# Supplementary material for: Ultrafast photophysics of para-substituted 2,5-bis(arylethynyl) rhodacyclopentadienes: thermally activated intersystem crossing
Source: Royal Society of Chemistry journal article supplement (doi:10.1039/d4sc04306e), 2024-01-01
Supplement: d4sc04306e2.pdf [file d4sc04306e2.pdf]

## Supporting Information

# Ultrafast Photophysics of *para*-Substituted 2,5-Bis(arylethynyl) Rhodacyclopentadienes: Thermally Activated Intersystem Crossing

Zilong Guo,<sup>b</sup> Yaxin Wang,<sup>b</sup> Julia Heitmüller,<sup>a</sup> Carolin Sieck,<sup>c</sup> Andreas Prüfer,<sup>d</sup> Philipp Ralle,<sup>d</sup> Andreas Steffen,<sup>d</sup> Petr Henke,<sup>e,g</sup> Peter R. Ogilby,<sup>\*e</sup> Todd B. Marder,<sup>\*c,f</sup> Xiaonan Ma,<sup>\*b,a</sup> and Tobias Brixner<sup>\*a,f</sup>

# Contents

|                                                  |      |
|--------------------------------------------------|------|
| S7. Raw data of fs-TA measurements               | S3   |
| Table S5                                         | S3   |
| Table S6                                         | S112 |
| Table S7                                         | S221 |
| Table S8                                         | S331 |
| S8. TD-DFT and UDFT results of D-RC-A and A-RC-A | S442 |
| Table S9                                         | S442 |
| Table S10                                        | S444 |
| Table S11                                        | S447 |
| Table S12                                        | S449 |
| Table S13                                        | S452 |
| Table S14                                        | S454 |
| Table S15                                        | S456 |
| Table S16                                        | S459 |

### S7. Raw data of fs-TA measurements.

**Table S5.** Raw data of fs-TA signals of D-RC-A collected under UV ( $\lambda_{ex} = 295$  nm) excitation in the  $\lambda_{pr} = 320\text{--}670$  nm regime, the unit of  $\Delta A$  in the table is mOD.

| Wavelength<br>(nm)<br>Time<br>(ps) | 320.70 | 322.11 | 323.52 | 324.93 | 326.34 | 327.75 | 329.16 | 330.56 | 331.97 | 333.38 | 334.79 |
|------------------------------------|--------|--------|--------|--------|--------|--------|--------|--------|--------|--------|--------|
| -3.28                              | -0.04  | 0.89   | 0.32   | 0.04   | 0.49   | 0.16   | 0.74   | -0.03  | 0.36   | 0.56   | -0.47  |
| -2.78                              | 0.25   | -0.19  | -0.02  | -0.51  | 0.10   | 0.14   | -0.35  | 0.19   | -0.11  | -0.53  | 0.04   |
| -2.28                              | 1.17   | -0.05  | -0.41  | -0.30  | 0.30   | 0.28   | -0.08  | 0.32   | 0.03   | -0.39  | 0.41   |
| -1.78                              | -0.25  | 0.48   | 0.32   | 0.20   | -0.10  | -0.42  | 0.17   | 0.22   | 0.35   | 0.06   | -0.15  |
| -1.28                              | 0.61   | 0.34   | 1.15   | 0.45   | 0.14   | 1.01   | 1.07   | 0.57   | 0.32   | 0.43   | 0.45   |
| -0.78                              | -0.83  | 0.42   | -0.91  | 0.09   | -0.75  | 0.03   | -0.44  | 0.01   | -0.41  | 0.15   | 0.01   |
| -0.28                              | -0.01  | -1.14  | -0.29  | 0.24   | -0.18  | -0.52  | -0.74  | -0.72  | -0.25  | 0.09   | 0.05   |
| 0.22                               | -0.91  | -0.75  | -0.16  | -0.21  | 0.00   | -0.69  | -0.38  | -0.56  | -0.29  | -0.38  | -0.33  |
| 0.32                               | -1.90  | -0.65  | 0.45   | 0.07   | 1.03   | 0.27   | 0.75   | 0.16   | -0.01  | -0.04  | 0.36   |
| 0.42                               | 0.62   | -1.69  | -3.67  | -4.11  | -3.96  | -3.03  | -1.30  | 0.63   | 0.73   | 1.19   | 0.61   |
| 0.52                               | 2.10   | 1.94   | 1.61   | 0.60   | 1.21   | 0.03   | 0.67   | 0.21   | -1.49  | -4.62  | -6.09  |
| 0.62                               | 1.06   | 2.27   | 0.84   | 1.18   | -0.22  | 1.23   | 0.61   | 0.90   | 0.06   | 0.22   | -0.73  |
| 0.72                               | 0.72   | 1.19   | 1.53   | 1.47   | 0.95   | 1.30   | 0.96   | 1.22   | 1.13   | 0.99   | 0.79   |
| 0.77                               | 1.61   | 0.72   | 0.08   | -0.02  | 1.55   | 0.08   | 1.41   | 0.96   | 0.64   | 0.69   | 0.03   |
| 0.82                               | 1.92   | 1.20   | 0.48   | 1.12   | 0.17   | 0.44   | 0.15   | 1.12   | 0.24   | 0.09   | 0.18   |
| 0.87                               | 1.60   | 1.56   | 1.64   | 0.59   | 1.07   | 0.82   | 1.05   | 0.69   | 0.64   | 0.16   | 0.49   |
| 0.92                               | 3.04   | 2.95   | 2.61   | 1.75   | 2.27   | 1.56   | 1.53   | 1.33   | 1.11   | 0.93   | 0.43   |
| 0.97                               | 2.46   | 1.71   | 2.67   | 1.29   | 1.65   | 1.58   | 1.50   | 1.64   | 1.45   | 1.05   | 0.71   |
| 1.02                               | 1.04   | 1.05   | 1.85   | 0.82   | 1.12   | 1.13   | 0.53   | 0.78   | 0.60   | 0.36   | 0.15   |
| 1.07                               | 2.95   | 1.16   | 0.11   | 1.42   | 0.96   | 0.92   | 0.84   | 1.30   | 0.32   | -0.11  | 0.07   |
| 1.12                               | 2.78   | 1.09   | 1.38   | 1.89   | 1.35   | 1.10   | 2.06   | 1.70   | 0.98   | 0.69   | 1.06   |
| 1.17                               | 2.76   | 2.43   | 2.93   | 2.23   | 2.89   | 1.91   | 1.73   | 1.48   | 1.25   | 0.82   | 0.32   |
| 1.22                               | 3.27   | 2.50   | 2.39   | 1.96   | 1.81   | 1.26   | 2.04   | 1.61   | 1.54   | 1.04   | 1.06   |
| 1.27                               | 3.22   | 2.66   | 1.61   | 1.64   | 1.81   | 1.65   | 1.96   | 2.32   | 1.76   | 0.93   | 0.58   |
| 1.32                               | 2.48   | 2.02   | 1.42   | 1.16   | 1.00   | 1.37   | 1.19   | 1.64   | 0.44   | 1.06   | 0.68   |
| 1.37                               | 1.67   | 0.92   | 1.53   | 1.51   | 0.60   | 0.65   | 0.80   | 0.67   | 0.99   | 0.60   | -0.02  |
| 1.42                               | 3.25   | 2.73   | 2.77   | 1.83   | 1.60   | 1.60   | 1.34   | 1.88   | 1.92   | 1.22   | 0.83   |
| 1.47                               | 2.82   | 2.98   | 2.56   | 2.05   | 1.42   | 1.89   | 1.79   | 1.64   | 0.77   | 0.88   | 0.58   |
| 1.52                               | 2.00   | 2.21   | 1.61   | 1.37   | 1.30   | 1.02   | 1.76   | 1.67   | 1.27   | 0.34   | 0.25   |
| 1.57                               | 2.07   | 2.02   | 1.65   | 1.81   | 1.88   | 1.30   | 2.03   | 1.79   | 0.88   | 0.90   | 1.01   |
| 1.62                               | 1.78   | 1.82   | 1.19   | 0.96   | 0.64   | 0.60   | 1.56   | 1.14   | 1.54   | 0.66   | 0.58   |
| 1.67                               | 1.82   | 2.64   | 2.43   | 1.27   | 1.53   | 1.88   | 1.70   | 1.36   | 1.41   | 1.03   | 0.74   |
| 1.72                               | 3.56   | 3.10   | 2.65   | 2.84   | 2.10   | 2.19   | 2.46   | 2.45   | 1.72   | 1.82   | 1.21   |
| 1.77                               | 3.49   | 2.78   | 3.01   | 2.64   | 1.72   | 1.70   | 2.69   | 2.19   | 1.51   | 1.50   | 0.66   |
| 1.82                               | 3.17   | 2.09   | 1.48   | 0.62   | 1.12   | 0.93   | 1.55   | 1.18   | 1.05   | 0.62   | 0.52   |
| 1.87                               | 1.12   | 1.84   | 0.94   | 1.36   | 1.30   | 0.70   | 1.27   | 0.46   | 0.29   | 0.48   | 0.38   |
| 1.92                               | 2.09   | 1.01   | 2.16   | 1.44   | 1.30   | 1.37   | 0.49   | 1.25   | 1.04   | 0.70   | 0.75   |
| 1.97                               | 3.43   | 2.82   | 3.18   | 2.03   | 1.49   | 2.72   | 2.39   | 2.31   | 1.52   | 1.82   | 1.17   |
| 2.02                               | 3.41   | 2.74   | 2.01   | 1.60   | 1.90   | 2.71   | 2.04   | 2.55   | 1.12   | 1.78   | 1.23   |
| 2.07                               | 3.38   | 3.49   | 3.05   | 2.85   | 2.11   | 2.92   | 2.35   | 2.30   | 2.23   | 1.65   | 1.17   |
| 2.12                               | 1.76   | 1.98   | 2.70   | 1.93   | 1.08   | 1.11   | 1.16   | 1.10   | 1.18   | 0.45   | 1.17   |
| 2.17                               | 1.31   | 0.84   | 1.70   | 1.57   | 1.33   | 1.28   | 0.49   | 1.08   | 0.59   | 0.97   | 0.69   |
| 2.22                               | 2.80   | 2.76   | 0.97   | 1.76   | 0.76   | 1.33   | 2.31   | 1.71   | 2.05   | 1.67   | 0.69   |

|      |      |      |       |      |       |      |       |      |      |      |       |
|------|------|------|-------|------|-------|------|-------|------|------|------|-------|
| 2.27 | 2.11 | 1.76 | 1.50  | 1.42 | 1.69  | 1.60 | 2.40  | 1.14 | 0.96 | 0.63 | 0.26  |
| 2.32 | 3.92 | 3.45 | 3.00  | 2.69 | 2.71  | 2.51 | 2.59  | 2.46 | 2.45 | 1.58 | 1.36  |
| 2.37 | 3.40 | 1.97 | 3.07  | 1.84 | 2.20  | 1.41 | 2.08  | 1.42 | 1.56 | 1.12 | 1.26  |
| 2.42 | 1.41 | 1.65 | -0.38 | 0.65 | 0.93  | 1.27 | 1.06  | 1.09 | 1.00 | 0.81 | 0.88  |
| 2.47 | 2.09 | 2.10 | 1.33  | 0.29 | 0.48  | 0.98 | 0.98  | 1.03 | 0.76 | 0.50 | 0.29  |
| 2.52 | 1.91 | 2.32 | 2.85  | 1.44 | 1.21  | 2.46 | 2.18  | 1.44 | 1.42 | 1.54 | 1.09  |
| 2.57 | 4.77 | 2.48 | 2.65  | 2.67 | 1.91  | 2.00 | 2.96  | 2.33 | 1.60 | 1.67 | 1.88  |
| 2.62 | 2.79 | 2.62 | 2.07  | 2.97 | 2.62  | 2.97 | 2.44  | 1.85 | 1.41 | 1.56 | 1.17  |
| 2.67 | 1.56 | 1.48 | 1.20  | 1.97 | 1.47  | 1.35 | 1.54  | 1.98 | 0.88 | 0.86 | 0.70  |
| 2.72 | 0.65 | 0.87 | 1.61  | 1.65 | 0.12  | 0.44 | 1.55  | 0.39 | 1.18 | 1.41 | 0.40  |
| 2.77 | 2.23 | 1.27 | 2.01  | 1.77 | 1.33  | 1.96 | 2.06  | 2.31 | 1.87 | 1.67 | 1.65  |
| 2.82 | 2.57 | 2.24 | 2.92  | 1.80 | 1.11  | 1.78 | 1.71  | 1.47 | 1.07 | 1.13 | 0.60  |
| 2.87 | 3.59 | 3.81 | 2.76  | 3.07 | 2.30  | 2.75 | 2.36  | 1.93 | 1.58 | 2.04 | 1.39  |
| 2.92 | 1.76 | 2.55 | 2.36  | 2.14 | 2.41  | 1.68 | 2.10  | 1.99 | 1.37 | 0.93 | 1.21  |
| 2.97 | 2.41 | 2.98 | 1.38  | 3.03 | 1.67  | 1.66 | 2.23  | 2.28 | 1.97 | 2.27 | 0.50  |
| 3.02 | 2.07 | 2.10 | 1.87  | 0.86 | 2.07  | 1.14 | 1.67  | 1.77 | 1.95 | 0.46 | 0.95  |
| 3.07 | 2.62 | 2.70 | 1.77  | 1.29 | 2.49  | 1.64 | 1.99  | 1.52 | 1.54 | 0.78 | 0.64  |
| 3.12 | 3.50 | 2.99 | 2.59  | 2.61 | 3.35  | 1.96 | 2.55  | 2.15 | 1.33 | 0.87 | 1.26  |
| 3.17 | 3.90 | 4.67 | 3.28  | 4.02 | 2.94  | 2.73 | 3.52  | 2.85 | 1.98 | 2.36 | 2.01  |
| 3.22 | 1.91 | 1.15 | 1.98  | 1.97 | 0.58  | 1.61 | 1.19  | 1.03 | 0.89 | 1.06 | 0.64  |
| 3.27 | 2.72 | 3.61 | -0.47 | 0.99 | 2.69  | 0.93 | -0.51 | 1.71 | 1.58 | 0.19 | 0.77  |
| 3.32 | 3.60 | 0.95 | 1.22  | 0.82 | 2.00  | 1.10 | 0.75  | 0.94 | 1.72 | 0.90 | 0.22  |
| 3.37 | 3.11 | 3.15 | 2.32  | 2.89 | 1.91  | 2.56 | 2.41  | 2.53 | 1.66 | 2.20 | 0.72  |
| 3.42 | 3.28 | 2.93 | 2.07  | 2.16 | 2.43  | 2.18 | 1.90  | 2.25 | 2.17 | 1.36 | 1.06  |
| 3.47 | 1.45 | 3.40 | 2.36  | 1.61 | 1.56  | 1.99 | 1.86  | 2.27 | 1.16 | 1.09 | 0.33  |
| 3.52 | 1.68 | 1.17 | 2.92  | 1.37 | 2.07  | 1.38 | 1.34  | 0.66 | 1.69 | 1.24 | 1.16  |
| 3.57 | 0.82 | 1.18 | 1.46  | 1.04 | 0.57  | 0.88 | 1.02  | 1.53 | 0.72 | 1.47 | 0.20  |
| 3.62 | 1.74 | 2.88 | 3.18  | 3.03 | 1.44  | 2.19 | 2.45  | 2.26 | 1.89 | 1.66 | 1.28  |
| 3.67 | 4.55 | 3.03 | 3.08  | 2.32 | 3.50  | 2.32 | 2.88  | 1.95 | 1.52 | 1.68 | 1.85  |
| 3.72 | 4.03 | 3.01 | 2.21  | 2.74 | 2.21  | 2.55 | 2.92  | 2.40 | 1.19 | 1.57 | 1.42  |
| 3.92 | 3.26 | 3.37 | 2.53  | 1.96 | 1.92  | 1.95 | 2.92  | 2.30 | 1.54 | 1.55 | 1.45  |
| 4.12 | 1.41 | 1.25 | 2.16  | 0.77 | 1.94  | 1.59 | 1.42  | 1.19 | 1.61 | 0.71 | 0.79  |
| 4.32 | 1.30 | 0.91 | 1.76  | 1.52 | -0.10 | 1.15 | 1.17  | 0.99 | 0.38 | 0.64 | 0.38  |
| 4.52 | 2.83 | 1.98 | 1.60  | 1.81 | 2.27  | 1.90 | 1.43  | 2.10 | 1.59 | 1.28 | 0.87  |
| 4.72 | 3.84 | 3.56 | 3.24  | 2.84 | 2.70  | 3.11 | 3.07  | 2.61 | 2.00 | 2.23 | 1.91  |
| 4.92 | 3.58 | 4.01 | 2.72  | 2.11 | 2.53  | 1.75 | 2.13  | 2.34 | 1.78 | 1.61 | 0.98  |
| 5.12 | 0.86 | 2.38 | 1.77  | 1.54 | 1.18  | 1.54 | 1.88  | 2.25 | 1.66 | 1.16 | 0.75  |
| 5.32 | 1.95 | 2.77 | 1.05  | 1.10 | 1.08  | 2.04 | 1.14  | 1.65 | 1.81 | 0.34 | 0.98  |
| 5.52 | 2.22 | 1.98 | 2.00  | 1.67 | 1.71  | 1.66 | 2.25  | 0.77 | 1.74 | 0.98 | 0.77  |
| 5.72 | 3.44 | 3.48 | 3.75  | 2.23 | 2.15  | 3.29 | 3.06  | 1.56 | 2.54 | 2.04 | 1.90  |
| 5.92 | 3.88 | 2.82 | 3.26  | 3.06 | 2.58  | 2.62 | 2.68  | 2.45 | 2.03 | 1.84 | 1.52  |
| 6.12 | 2.78 | 2.60 | 2.36  | 2.07 | 2.00  | 2.37 | 1.85  | 2.02 | 1.93 | 1.58 | 0.88  |
| 6.32 | 1.91 | 1.80 | 1.36  | 1.10 | 1.89  | 1.62 | 1.50  | 1.37 | 0.57 | 1.20 | 0.72  |
| 6.52 | 2.22 | 0.81 | 1.37  | 1.74 | 1.54  | 1.16 | 2.06  | 1.61 | 0.66 | 0.92 | 1.00  |
| 6.72 | 3.58 | 4.14 | 2.18  | 1.91 | 2.71  | 2.48 | 2.01  | 2.88 | 2.05 | 1.58 | 1.80  |
| 6.92 | 4.12 | 3.60 | 2.55  | 3.01 | 2.12  | 2.54 | 2.40  | 2.44 | 2.43 | 1.69 | 0.74  |
| 7.12 | 2.29 | 2.54 | 1.85  | 2.34 | 2.18  | 2.08 | 2.08  | 1.75 | 1.58 | 1.63 | 1.08  |
| 7.32 | 3.09 | 2.56 | 1.92  | 1.96 | 2.07  | 2.35 | 3.08  | 1.48 | 2.11 | 1.58 | 1.68  |
| 7.52 | 1.64 | 0.58 | 1.61  | 0.91 | 0.77  | 1.07 | 1.08  | 1.13 | 0.97 | 0.47 | -0.20 |
| 7.72 | 1.55 | 2.16 | 1.87  | 1.82 | 1.55  | 2.16 | 2.40  | 1.04 | 1.50 | 1.33 | 1.09  |

|       |      |      |      |      |      |      |      |      |      |      |      |
|-------|------|------|------|------|------|------|------|------|------|------|------|
| 7.92  | 2.75 | 3.24 | 2.59 | 2.01 | 2.54 | 2.61 | 2.43 | 1.89 | 2.01 | 1.45 | 1.12 |
| 8.12  | 2.95 | 2.58 | 2.25 | 2.46 | 2.19 | 2.39 | 2.97 | 2.24 | 1.83 | 1.58 | 1.02 |
| 8.32  | 2.88 | 3.20 | 2.65 | 2.15 | 1.52 | 2.05 | 2.15 | 1.83 | 2.10 | 1.25 | 0.52 |
| 8.52  | 2.40 | 2.17 | 1.23 | 1.10 | 1.51 | 1.86 | 1.44 | 1.81 | 1.11 | 0.51 | 0.64 |
| 8.72  | 1.74 | 1.44 | 1.22 | 1.68 | 1.60 | 1.60 | 1.97 | 1.28 | 0.79 | 1.33 | 1.35 |
| 8.92  | 3.61 | 2.58 | 0.77 | 2.28 | 2.45 | 1.40 | 1.67 | 2.20 | 1.56 | 1.22 | 1.96 |
| 9.12  | 3.51 | 3.37 | 3.04 | 2.54 | 1.90 | 2.66 | 2.86 | 2.12 | 1.79 | 1.87 | 1.70 |
| 9.32  | 3.82 | 3.98 | 2.92 | 3.91 | 3.02 | 2.85 | 3.14 | 3.31 | 3.13 | 2.01 | 2.39 |
| 9.52  | 2.81 | 2.65 | 2.79 | 2.61 | 2.84 | 2.42 | 2.55 | 1.75 | 2.10 | 1.10 | 1.85 |
| 9.72  | 1.85 | 0.65 | 1.77 | 1.82 | 1.87 | 1.13 | 2.12 | 2.01 | 0.93 | 0.80 | 1.40 |
| 9.92  | 2.13 | 2.40 | 2.50 | 1.00 | 2.55 | 2.12 | 1.57 | 2.28 | 1.88 | 1.53 | 1.33 |
| 10.12 | 3.13 | 3.66 | 1.62 | 2.24 | 2.35 | 2.40 | 1.53 | 1.90 | 2.25 | 1.60 | 1.18 |
| 10.32 | 3.19 | 2.81 | 3.01 | 2.23 | 2.23 | 2.68 | 1.98 | 2.70 | 2.59 | 2.35 | 1.35 |
| 10.52 | 3.73 | 3.14 | 1.57 | 1.33 | 2.27 | 1.65 | 1.86 | 1.98 | 1.91 | 1.23 | 1.34 |
| 10.72 | 2.18 | 2.60 | 2.75 | 1.51 | 1.93 | 2.38 | 2.37 | 2.43 | 1.92 | 1.74 | 1.44 |
| 10.92 | 1.87 | 2.07 | 2.24 | 1.26 | 1.81 | 1.53 | 1.92 | 1.70 | 1.54 | 1.43 | 0.58 |
| 11.12 | 2.99 | 2.47 | 2.65 | 1.63 | 1.90 | 1.92 | 2.56 | 2.49 | 2.09 | 1.91 | 1.92 |
| 11.32 | 2.71 | 3.49 | 2.81 | 2.91 | 2.01 | 2.11 | 2.60 | 2.48 | 2.42 | 1.64 | 1.48 |
| 11.52 | 4.06 | 3.57 | 3.01 | 2.69 | 2.29 | 1.78 | 1.70 | 2.24 | 2.21 | 1.46 | 0.89 |
| 11.72 | 1.79 | 1.27 | 1.24 | 1.36 | 0.66 | 1.85 | 1.99 | 1.59 | 1.38 | 0.75 | 0.71 |
| 11.92 | 1.77 | 1.39 | 1.14 | 0.97 | 0.76 | 0.66 | 1.19 | 0.40 | 1.07 | 0.52 | 0.82 |
| 12.12 | 1.16 | 1.23 | 1.49 | 1.40 | 1.02 | 0.82 | 0.78 | 0.76 | 0.63 | 0.76 | 0.87 |
| 12.32 | 2.29 | 2.30 | 2.37 | 2.33 | 2.36 | 2.21 | 1.55 | 1.54 | 1.30 | 1.87 | 1.51 |
| 12.52 | 2.59 | 3.15 | 3.55 | 2.05 | 2.62 | 1.88 | 2.64 | 2.67 | 2.56 | 1.60 | 1.48 |
| 12.72 | 3.67 | 2.98 | 3.17 | 2.70 | 2.56 | 1.84 | 2.77 | 2.55 | 2.42 | 1.46 | 1.31 |
| 12.92 | 2.33 | 1.87 | 2.52 | 1.94 | 1.66 | 1.75 | 2.18 | 1.99 | 1.28 | 1.11 | 1.47 |
| 13.12 | 1.18 | 2.03 | 1.10 | 0.77 | 1.45 | 1.52 | 1.43 | 1.29 | 1.34 | 1.18 | 0.97 |
| 13.32 | 2.57 | 1.69 | 3.34 | 2.52 | 2.44 | 1.80 | 2.42 | 1.89 | 2.55 | 1.76 | 1.86 |
| 13.52 | 3.79 | 3.33 | 3.16 | 3.11 | 2.76 | 3.63 | 2.97 | 2.17 | 1.75 | 1.75 | 1.59 |
| 13.72 | 3.48 | 3.45 | 3.70 | 3.64 | 3.06 | 3.34 | 3.10 | 3.30 | 2.22 | 1.91 | 2.62 |
| 13.92 | 2.75 | 2.82 | 2.64 | 2.20 | 2.28 | 2.23 | 2.81 | 1.61 | 1.81 | 1.61 | 1.26 |
| 14.00 | 1.95 | 1.23 | 1.91 | 1.47 | 1.29 | 1.17 | 0.91 | 1.38 | 0.98 | 1.43 | 1.11 |
| 14.08 | 2.06 | 2.73 | 0.85 | 1.59 | 0.94 | 1.53 | 1.26 | 0.73 | 1.50 | 0.51 | 0.60 |
| 14.17 | 2.27 | 1.75 | 2.07 | 1.73 | 1.83 | 2.21 | 0.93 | 1.13 | 1.37 | 0.97 | 0.80 |
| 14.27 | 3.16 | 3.33 | 2.72 | 3.31 | 2.42 | 1.85 | 3.07 | 2.38 | 2.26 | 1.61 | 1.84 |
| 14.38 | 3.78 | 2.93 | 3.08 | 1.88 | 2.44 | 2.06 | 2.32 | 2.54 | 1.99 | 1.89 | 1.30 |
| 14.49 | 2.69 | 1.69 | 1.58 | 2.59 | 2.49 | 1.49 | 2.26 | 1.63 | 1.55 | 1.52 | 0.82 |
| 14.61 | 1.91 | 1.58 | 1.25 | 1.00 | 0.96 | 0.83 | 2.04 | 1.51 | 1.47 | 0.71 | 0.65 |
| 14.75 | 3.04 | 2.71 | 1.16 | 0.73 | 1.97 | 2.51 | 2.09 | 1.52 | 2.23 | 1.18 | 0.93 |
| 14.89 | 2.68 | 3.17 | 2.42 | 1.52 | 1.78 | 1.42 | 2.11 | 1.59 | 1.81 | 1.42 | 0.81 |
| 15.05 | 3.81 | 3.19 | 2.93 | 1.80 | 2.91 | 2.90 | 2.30 | 2.89 | 2.41 | 1.38 | 2.12 |
| 15.21 | 2.45 | 3.24 | 2.16 | 1.71 | 1.95 | 2.23 | 2.27 | 1.53 | 1.43 | 1.04 | 0.53 |
| 15.39 | 2.71 | 1.96 | 1.59 | 1.80 | 2.22 | 1.79 | 2.05 | 2.02 | 1.50 | 0.59 | 0.95 |
| 15.59 | 1.97 | 1.61 | 1.84 | 1.28 | 1.80 | 1.92 | 1.04 | 2.27 | 0.34 | 1.08 | 1.09 |
| 15.80 | 3.35 | 2.61 | 2.96 | 2.61 | 2.09 | 1.90 | 2.40 | 1.91 | 1.60 | 1.54 | 1.77 |
| 16.02 | 3.82 | 3.68 | 2.30 | 3.04 | 2.69 | 3.11 | 2.39 | 2.11 | 1.54 | 1.86 | 1.12 |
| 16.27 | 4.43 | 2.91 | 3.49 | 3.91 | 2.94 | 2.69 | 3.13 | 2.74 | 2.40 | 2.10 | 1.52 |
| 16.53 | 1.10 | 2.93 | 2.60 | 1.60 | 2.47 | 1.91 | 1.94 | 1.52 | 1.71 | 1.79 | 0.64 |
| 16.81 | 3.19 | 2.40 | 1.77 | 2.14 | 2.17 | 1.72 | 1.79 | 1.50 | 0.93 | 1.72 | 0.98 |
| 17.12 | 2.43 | 2.01 | 1.90 | 0.78 | 1.37 | 1.76 | 1.19 | 1.19 | 0.32 | 1.25 | 0.62 |

|        |      |      |      |      |      |      |      |      |      |      |      |
|--------|------|------|------|------|------|------|------|------|------|------|------|
| 17.45  | 3.26 | 3.51 | 2.79 | 2.76 | 2.69 | 2.78 | 2.30 | 2.37 | 2.09 | 2.07 | 1.57 |
| 17.81  | 4.60 | 3.16 | 3.46 | 2.33 | 2.79 | 1.92 | 3.44 | 1.79 | 1.42 | 2.16 | 1.74 |
| 18.19  | 3.62 | 3.15 | 3.19 | 2.85 | 3.23 | 2.94 | 2.89 | 3.02 | 2.73 | 1.97 | 1.45 |
| 18.60  | 2.15 | 1.63 | 1.65 | 2.82 | 0.86 | 1.26 | 1.07 | 1.90 | 1.85 | 1.19 | 0.94 |
| 19.05  | 2.40 | 2.70 | 2.35 | 1.19 | 1.34 | 2.38 | 2.18 | 1.92 | 1.92 | 0.79 | 1.80 |
| 19.53  | 3.31 | 2.76 | 2.53 | 1.62 | 1.57 | 2.08 | 2.61 | 1.81 | 1.74 | 1.22 | 1.13 |
| 20.05  | 3.06 | 3.29 | 3.15 | 2.48 | 2.90 | 1.98 | 2.95 | 2.52 | 2.04 | 1.93 | 1.95 |
| 20.61  | 3.41 | 3.20 | 3.20 | 2.88 | 3.03 | 2.77 | 2.66 | 2.34 | 1.86 | 1.73 | 1.47 |
| 21.22  | 2.71 | 3.12 | 1.99 | 2.01 | 2.16 | 1.81 | 2.26 | 1.59 | 1.97 | 1.47 | 1.61 |
| 21.87  | 2.34 | 0.60 | 0.87 | 1.65 | 1.40 | 1.63 | 1.69 | 1.13 | 1.18 | 0.64 | 1.04 |
| 22.57  | 1.97 | 2.41 | 2.04 | 2.09 | 1.93 | 1.23 | 2.27 | 1.89 | 2.31 | 1.38 | 0.51 |
| 23.33  | 3.01 | 2.73 | 2.43 | 2.14 | 2.52 | 2.61 | 2.46 | 2.03 | 1.25 | 1.71 | 1.56 |
| 24.15  | 4.09 | 3.58 | 3.08 | 2.45 | 2.19 | 2.72 | 2.63 | 2.37 | 2.20 | 1.98 | 2.10 |
| 25.03  | 3.16 | 3.03 | 2.61 | 3.27 | 2.85 | 1.56 | 2.44 | 2.41 | 2.15 | 1.98 | 1.49 |
| 25.98  | 1.94 | 2.22 | 1.53 | 2.64 | 1.07 | 1.25 | 2.29 | 2.02 | 1.83 | 1.23 | 1.38 |
| 27.01  | 1.85 | 4.10 | 2.03 | 2.15 | 2.09 | 1.96 | 2.00 | 1.76 | 1.92 | 0.99 | 1.92 |
| 28.11  | 2.40 | 1.40 | 1.34 | 1.47 | 1.00 | 1.64 | 1.99 | 1.96 | 1.28 | 1.77 | 0.44 |
| 29.3   | 4.09 | 3.64 | 3.59 | 3.11 | 2.60 | 2.73 | 3.05 | 2.40 | 2.45 | 2.50 | 2.02 |
| 30.59  | 3.35 | 3.12 | 2.69 | 3.09 | 2.64 | 2.75 | 2.49 | 2.29 | 1.77 | 2.32 | 1.61 |
| 31.98  | 2.35 | 1.98 | 2.47 | 1.92 | 2.40 | 1.81 | 1.84 | 1.63 | 1.77 | 1.18 | 0.84 |
| 33.47  | 3.36 | 2.98 | 2.91 | 2.42 | 3.14 | 2.28 | 2.31 | 2.14 | 1.69 | 1.24 | 1.78 |
| 35.09  | 2.93 | 2.55 | 2.14 | 1.69 | 1.53 | 1.74 | 2.06 | 1.44 | 1.86 | 1.49 | 1.25 |
| 36.83  | 3.04 | 1.74 | 1.95 | 1.71 | 1.57 | 2.21 | 1.45 | 2.00 | 1.48 | 1.66 | 0.77 |
| 38.71  | 3.20 | 3.52 | 3.04 | 3.30 | 3.05 | 2.88 | 3.29 | 2.42 | 2.70 | 1.91 | 1.55 |
| 40.73  | 3.78 | 3.51 | 3.01 | 2.63 | 3.40 | 2.22 | 2.02 | 1.68 | 1.77 | 1.86 | 1.45 |
| 42.92  | 2.25 | 1.85 | 2.13 | 2.30 | 2.81 | 2.42 | 2.66 | 2.60 | 1.77 | 1.78 | 1.14 |
| 45.27  | 2.24 | 2.10 | 1.25 | 2.48 | 1.29 | 1.55 | 2.01 | 1.84 | 1.50 | 0.87 | 0.54 |
| 47.81  | 3.12 | 2.95 | 2.47 | 1.18 | 3.11 | 2.12 | 2.19 | 2.42 | 2.58 | 2.37 | 2.06 |
| 50.55  | 3.61 | 3.84 | 2.71 | 2.20 | 3.01 | 2.80 | 2.70 | 2.88 | 2.27 | 1.68 | 1.20 |
| 53.51  | 4.07 | 4.03 | 4.99 | 4.07 | 3.56 | 3.64 | 3.93 | 3.66 | 3.48 | 3.00 | 2.24 |
| 56.69  | 3.35 | 3.34 | 2.68 | 2.68 | 2.50 | 2.31 | 2.54 | 2.69 | 2.44 | 2.15 | 1.30 |
| 60.13  | 2.56 | 2.35 | 1.79 | 1.85 | 2.43 | 1.95 | 1.98 | 1.93 | 1.87 | 0.81 | 1.06 |
| 63.84  | 2.81 | 2.12 | 2.27 | 1.61 | 1.57 | 1.73 | 2.00 | 1.74 | 1.58 | 1.63 | 1.29 |
| 67.83  | 2.80 | 2.88 | 2.79 | 2.32 | 2.95 | 1.65 | 2.10 | 2.41 | 2.08 | 1.93 | 1.39 |
| 72.15  | 3.33 | 4.63 | 3.98 | 2.17 | 3.27 | 2.50 | 2.10 | 3.15 | 2.74 | 2.48 | 1.80 |
| 76.80  | 3.43 | 3.15 | 2.84 | 2.96 | 2.91 | 2.70 | 3.09 | 2.53 | 2.17 | 1.95 | 1.74 |
| 81.81  | 2.27 | 2.75 | 2.01 | 2.16 | 1.90 | 1.71 | 1.59 | 2.21 | 1.21 | 1.98 | 1.14 |
| 87.22  | 1.24 | 2.04 | 1.61 | 1.02 | 1.42 | 1.49 | 2.40 | 0.77 | 0.75 | 1.01 | 1.02 |
| 93.06  | 2.61 | 3.15 | 2.18 | 2.23 | 2.45 | 3.27 | 2.31 | 2.31 | 2.06 | 1.78 | 1.07 |
| 99.35  | 2.54 | 3.53 | 3.67 | 2.65 | 2.11 | 2.67 | 2.33 | 2.79 | 1.43 | 1.79 | 1.41 |
| 106.13 | 3.45 | 3.65 | 3.88 | 4.06 | 2.64 | 3.30 | 2.66 | 2.51 | 2.23 | 2.22 | 1.88 |
| 113.45 | 3.01 | 4.50 | 2.91 | 3.02 | 2.74 | 2.71 | 2.20 | 2.16 | 2.10 | 1.46 | 0.75 |
| 121.34 | 2.52 | 1.88 | 1.84 | 2.10 | 1.94 | 1.91 | 2.15 | 1.76 | 1.65 | 0.72 | 0.68 |
| 129.86 | 2.92 | 2.61 | 2.95 | 2.75 | 3.32 | 2.24 | 2.69 | 2.84 | 2.42 | 1.31 | 1.39 |
| 139.04 | 3.04 | 2.38 | 2.25 | 1.60 | 3.49 | 2.28 | 2.91 | 2.16 | 1.73 | 2.16 | 1.14 |
| 148.94 | 4.02 | 3.83 | 3.92 | 3.27 | 3.04 | 3.74 | 2.56 | 2.91 | 2.50 | 2.11 | 1.54 |
| 159.62 | 3.55 | 3.44 | 2.64 | 2.29 | 2.05 | 2.51 | 2.86 | 2.10 | 2.41 | 1.98 | 1.40 |
| 171.14 | 2.42 | 3.53 | 1.87 | 2.04 | 2.16 | 2.88 | 2.04 | 1.83 | 1.53 | 0.97 | 0.72 |
| 183.56 | 2.89 | 2.60 | 2.38 | 2.20 | 2.19 | 1.86 | 1.59 | 1.73 | 1.69 | 0.88 | 1.80 |
| 196.96 | 2.35 | 2.85 | 2.23 | 1.85 | 1.54 | 1.91 | 2.19 | 2.29 | 1.64 | 1.86 | 0.80 |

|         |      |      |      |      |      |      |      |      |      |      |      |
|---------|------|------|------|------|------|------|------|------|------|------|------|
| 211.41  | 2.56 | 3.13 | 2.96 | 3.42 | 2.97 | 2.52 | 2.70 | 2.35 | 2.10 | 1.71 | 1.42 |
| 226.99  | 3.90 | 4.40 | 3.82 | 3.44 | 2.63 | 3.33 | 3.23 | 2.52 | 1.80 | 2.21 | 1.65 |
| 243.80  | 2.72 | 2.95 | 3.42 | 2.90 | 3.17 | 2.65 | 2.26 | 2.26 | 1.30 | 1.89 | 1.53 |
| 261.93  | 3.97 | 2.40 | 2.55 | 2.52 | 1.76 | 3.61 | 1.79 | 2.09 | 2.04 | 2.24 | 1.72 |
| 281.48  | 2.55 | 1.40 | 1.48 | 2.06 | 1.89 | 2.07 | 2.26 | 1.32 | 1.33 | 1.09 | 0.79 |
| 302.56  | 4.12 | 4.75 | 2.91 | 3.26 | 2.34 | 3.60 | 2.38 | 3.31 | 2.24 | 1.73 | 1.54 |
| 325.3   | 4.62 | 4.20 | 4.04 | 3.31 | 4.06 | 3.48 | 3.77 | 2.67 | 3.03 | 2.02 | 2.08 |
| 349.83  | 3.81 | 3.79 | 3.65 | 3.27 | 3.90 | 3.04 | 2.78 | 2.77 | 2.45 | 1.80 | 1.67 |
| 376.28  | 2.93 | 3.37 | 2.48 | 3.13 | 2.99 | 2.20 | 2.56 | 2.05 | 2.06 | 1.53 | 1.26 |
| 404.81  | 3.22 | 3.30 | 2.70 | 2.62 | 1.95 | 1.56 | 1.67 | 1.83 | 1.83 | 0.98 | 1.48 |
| 435.58  | 1.88 | 3.28 | 2.50 | 2.13 | 2.84 | 2.10 | 2.62 | 2.29 | 2.07 | 1.88 | 1.44 |
| 468.76  | 3.65 | 3.37 | 3.21 | 2.60 | 2.63 | 3.22 | 2.92 | 2.36 | 2.44 | 2.20 | 1.62 |
| 504.55  | 4.73 | 5.12 | 4.19 | 3.94 | 3.79 | 3.67 | 3.14 | 3.22 | 2.75 | 2.15 | 1.78 |
| 543.15  | 4.46 | 4.43 | 4.41 | 4.34 | 4.16 | 3.81 | 3.03 | 3.82 | 2.63 | 1.65 | 1.89 |
| 584.78  | 3.33 | 2.37 | 2.85 | 2.43 | 2.44 | 1.92 | 2.28 | 1.76 | 1.69 | 1.50 | 1.29 |
| 629.68  | 2.37 | 3.55 | 3.21 | 2.03 | 2.67 | 1.88 | 2.10 | 2.29 | 1.60 | 1.61 | 1.40 |
| 678.10  | 3.05 | 1.39 | 2.86 | 0.44 | 2.07 | 1.52 | 1.69 | 1.26 | 1.01 | 0.93 | 0.21 |
| 730.33  | 5.15 | 4.46 | 4.22 | 3.96 | 3.47 | 2.91 | 3.79 | 3.40 | 2.61 | 2.01 | 1.54 |
| 786.65  | 4.02 | 4.99 | 3.42 | 3.65 | 3.02 | 3.25 | 2.46 | 2.94 | 2.59 | 2.23 | 1.52 |
| 847.40  | 3.87 | 3.17 | 3.12 | 3.36 | 2.93 | 2.94 | 2.70 | 2.99 | 2.37 | 2.20 | 1.73 |
| 912.92  | 3.24 | 3.34 | 2.34 | 2.61 | 3.27 | 2.61 | 2.04 | 2.04 | 1.52 | 1.28 | 0.74 |
| 983.58  | 2.93 | 2.65 | 2.97 | 2.40 | 2.70 | 2.97 | 2.90 | 2.01 | 1.99 | 1.53 | 1.07 |
| 1059.78 | 2.95 | 1.98 | 2.97 | 2.21 | 2.18 | 1.41 | 2.72 | 1.31 | 1.68 | 0.94 | 0.99 |
| 1141.98 | 5.12 | 3.24 | 3.73 | 2.94 | 3.39 | 2.45 | 3.48 | 1.97 | 1.82 | 1.30 | 0.99 |
| 1230.62 | 3.78 | 3.50 | 4.12 | 2.92 | 3.35 | 2.74 | 2.65 | 2.68 | 2.40 | 1.23 | 1.78 |
| 1326.23 | 3.81 | 2.91 | 3.23 | 2.42 | 2.47 | 2.36 | 2.17 | 2.05 | 1.74 | 0.70 | 0.60 |
| 1429.34 | 3.36 | 2.58 | 2.45 | 2.96 | 1.79 | 0.92 | 2.54 | 1.15 | 1.35 | 0.49 | 1.51 |
| 1540.54 | 2.82 | 2.95 | 2.71 | 2.14 | 1.62 | 1.82 | 2.20 | 2.27 | 1.72 | 1.44 | 0.90 |
| 1660.48 | 5.21 | 3.75 | 3.82 | 4.22 | 4.35 | 2.78 | 2.74 | 2.89 | 2.16 | 1.99 | 1.45 |
| 1789.83 | 5.79 | 4.06 | 4.63 | 4.61 | 3.94 | 3.57 | 3.89 | 2.79 | 2.52 | 2.04 | 1.97 |
| 1929.34 | 4.28 | 3.99 | 3.28 | 3.08 | 3.23 | 2.39 | 2.78 | 2.52 | 1.73 | 1.68 | 1.74 |
| 2079.80 | 1.96 | 3.00 | 2.27 | 3.23 | 2.67 | 1.98 | 2.07 | 1.79 | 1.34 | 0.86 | 0.24 |
| 2242.08 | 2.94 | 3.04 | 3.15 | 2.63 | 2.26 | 2.17 | 2.71 | 2.03 | 1.44 | 1.16 | 0.66 |
| 2417.10 | 4.27 | 4.25 | 3.73 | 3.47 | 3.00 | 2.64 | 2.60 | 2.69 | 1.92 | 1.15 | 1.50 |
| 2605.85 | 4.17 | 4.38 | 4.26 | 3.92 | 3.54 | 2.57 | 2.74 | 3.02 | 1.65 | 1.84 | 1.29 |
| 2809.43 | 4.28 | 3.00 | 4.42 | 3.05 | 3.40 | 3.48 | 3.18 | 2.17 | 2.38 | 2.22 | 1.14 |
| 3028.99 | 4.29 | 2.47 | 3.05 | 3.30 | 3.49 | 1.42 | 3.47 | 2.46 | 1.71 | 1.57 | 1.11 |
| 3265.79 | 2.44 | 3.53 | 3.31 | 1.95 | 2.01 | 2.71 | 2.40 | 2.71 | 2.26 | 1.75 | 0.96 |
| 3521.18 | 3.95 | 3.24 | 3.56 | 2.63 | 2.90 | 2.47 | 2.76 | 2.34 | 2.05 | 1.17 | 1.48 |
| 3796.62 | 5.17 | 4.07 | 4.13 | 3.54 | 4.19 | 3.40 | 3.54 | 3.52 | 3.15 | 1.79 | 1.90 |

| Wavelength (nm) \ Time (ps) | 336.20 | 337.61 | 339.02 | 340.42 | 341.83 | 343.24 | 344.65 | 346.06 | 347.47 | 348.87 | 350.28 |
|-----------------------------|--------|--------|--------|--------|--------|--------|--------|--------|--------|--------|--------|
| -3.28                       | 0.22   | -0.09  | 0.13   | 0.07   | 0.19   | 0.04   | 0.02   | -0.12  | 0.16   | -0.12  | -0.03  |
| -2.78                       | -0.26  | 0.11   | -0.13  | -0.11  | -0.43  | -0.14  | -0.06  | 0.42   | 0.08   | -0.16  | 0.29   |
| -2.28                       | 0.17   | -0.11  | -0.06  | 0.16   | 0.37   | 0.28   | 0.28   | -0.14  | -0.06  | 0.20   | 0.09   |
| -1.78                       | -0.10  | -0.33  | 0.02   | -0.11  | -0.05  | -0.36  | 0.18   | -0.10  | -0.37  | -0.07  | 0.01   |
| -1.28                       | 0.50   | 0.87   | 0.93   | 0.45   | 0.24   | 0.36   | 0.52   | 0.26   | 0.60   | 0.56   | 0.16   |
| -0.78                       | -0.05  | -0.42  | -0.52  | 0.14   | -0.21  | -0.17  | 0.03   | 0.05   | 0.11   | 0.11   | 0.04   |
| -0.28                       | -0.26  | 0.12   | 0.12   | -0.02  | -0.01  | 0.07   | -0.62  | -0.12  | -0.30  | 0.00   | -0.11  |

|      |       |       |       |       |       |       |       |       |       |       |       |
|------|-------|-------|-------|-------|-------|-------|-------|-------|-------|-------|-------|
| 0.22 | -0.22 | -0.14 | -0.50 | -0.57 | -0.09 | -0.07 | -0.36 | -0.26 | -0.22 | -0.53 | -0.46 |
| 0.32 | -0.23 | -0.11 | 0.10  | 0.35  | -0.07 | 0.10  | 0.16  | 0.48  | -0.06 | -0.26 | 0.26  |
| 0.42 | 0.50  | 0.16  | 0.21  | -0.21 | 0.34  | 0.67  | -0.26 | 0.09  | 0.37  | 0.10  | -0.18 |
| 0.52 | -7.08 | -5.27 | -2.47 | 0.13  | 0.73  | 1.22  | 0.59  | 0.69  | 0.51  | 0.32  | -0.03 |
| 0.62 | -0.16 | -1.37 | -1.41 | -3.13 | -4.07 | -5.50 | -6.36 | -6.40 | -4.49 | -2.90 | -1.50 |
| 0.72 | -0.18 | 0.01  | -0.23 | -0.03 | -0.09 | -0.39 | -0.89 | -1.71 | -1.90 | -1.98 | -2.04 |
| 0.77 | -0.22 | 0.13  | 0.54  | 0.39  | 0.32  | 0.27  | -0.48 | -0.09 | -0.63 | -0.54 | -1.31 |
| 0.82 | 0.22  | 0.01  | -0.19 | 0.02  | -0.10 | -0.35 | -0.47 | -0.05 | -0.01 | -0.15 | -0.68 |
| 0.87 | -0.02 | -0.06 | -0.57 | -0.57 | -0.84 | -0.71 | -1.15 | -1.19 | -0.94 | -1.04 | -1.14 |
| 0.92 | 0.17  | 0.22  | 0.30  | -0.36 | -0.13 | -0.83 | -0.80 | -0.89 | -0.91 | -1.18 | -1.09 |
| 0.97 | 0.48  | 0.14  | -0.18 | -0.45 | -0.13 | -0.41 | -0.93 | -1.10 | -0.76 | -0.89 | -0.85 |
| 1.02 | 0.36  | -0.03 | -0.33 | -0.10 | -0.25 | -0.36 | -0.46 | -0.50 | -0.48 | -0.99 | -0.72 |
| 1.07 | 0.12  | -0.10 | -0.35 | -0.57 | -0.72 | -0.06 | -0.39 | -0.58 | -0.51 | -0.72 | -0.16 |
| 1.12 | 0.01  | -0.07 | 0.40  | -0.28 | -0.20 | -0.27 | -0.15 | -0.25 | -0.18 | -0.16 | -0.50 |
| 1.17 | 0.29  | 0.01  | 0.36  | -0.28 | -0.18 | -0.44 | -0.71 | -0.47 | -0.68 | -0.53 | -0.89 |
| 1.22 | 0.40  | 0.20  | -0.07 | -0.02 | -0.14 | -0.42 | -0.67 | -0.86 | -0.89 | -1.02 | -1.24 |
| 1.27 | 0.75  | 0.12  | 0.27  | 0.38  | 0.17  | -0.40 | -0.20 | -0.32 | -0.05 | -0.81 | -0.73 |
| 1.32 | 0.87  | 0.48  | 0.75  | -0.07 | -0.01 | -0.28 | -0.10 | 0.04  | -0.15 | -0.40 | -0.05 |
| 1.37 | 0.00  | 0.17  | -0.43 | 0.31  | -0.17 | -0.17 | -1.03 | -0.28 | -0.76 | -0.19 | -1.02 |
| 1.42 | 0.30  | 0.57  | 0.44  | 0.04  | 0.02  | -0.51 | -0.37 | -0.78 | -0.57 | -0.69 | -0.76 |
| 1.47 | 0.09  | 0.13  | 0.08  | -0.52 | -0.22 | -0.90 | -0.76 | -1.23 | -0.84 | -1.17 | -1.13 |
| 1.52 | -0.15 | 0.35  | -0.11 | -0.59 | -0.80 | -0.89 | -1.09 | -1.19 | -1.09 | -1.06 | -1.41 |
| 1.57 | 0.66  | 0.93  | 0.03  | 0.42  | 0.21  | -0.04 | -0.41 | -0.46 | -0.27 | -0.34 | -0.48 |
| 1.62 | 0.18  | -0.06 | 0.06  | 0.45  | -0.12 | -0.39 | 0.16  | 0.01  | 0.11  | 0.15  | 0.03  |
| 1.67 | 0.38  | 0.34  | 0.53  | -0.27 | 0.29  | -0.08 | -0.74 | 0.04  | 0.04  | -0.70 | -0.46 |
| 1.72 | 1.19  | 0.66  | 0.67  | 0.30  | 0.24  | -0.21 | -0.25 | -0.36 | -0.52 | -0.33 | -0.55 |
| 1.77 | 0.72  | 0.69  | 0.16  | 0.09  | -0.17 | -0.29 | -0.68 | -0.26 | -0.69 | -0.72 | -0.53 |
| 1.82 | 0.03  | 0.37  | 0.10  | -0.05 | -0.03 | -0.20 | -0.54 | -0.72 | -0.66 | -1.04 | -1.12 |
| 1.87 | 0.42  | 0.39  | 0.45  | 0.47  | 0.18  | 0.07  | -0.66 | -0.31 | -0.21 | -0.36 | -0.49 |
| 1.92 | 0.76  | 0.10  | 0.21  | -0.01 | 0.42  | 0.00  | -0.57 | -0.09 | -0.22 | -0.57 | -0.40 |
| 1.97 | 0.90  | 0.94  | 0.57  | 0.17  | 0.71  | 0.22  | -0.11 | -0.43 | -0.15 | -0.25 | -0.54 |
| 2.02 | 0.82  | 0.19  | 0.26  | 0.00  | 0.03  | 0.24  | -0.58 | -0.33 | -0.65 | -0.51 | -0.83 |
| 2.07 | 1.07  | 0.82  | 0.47  | 0.28  | 0.47  | -0.02 | -0.31 | -0.57 | -0.42 | -0.95 | -0.90 |
| 2.12 | 0.93  | 0.54  | 0.40  | 0.52  | -0.22 | -0.16 | 0.07  | -0.18 | -0.52 | -0.22 | -0.47 |
| 2.17 | 0.16  | 0.47  | -0.12 | 0.01  | -0.11 | 0.31  | -0.40 | -0.84 | -0.59 | -0.28 | 0.14  |
| 2.22 | 0.89  | 0.52  | 0.61  | 0.37  | 0.36  | -0.09 | -0.01 | -0.21 | -0.27 | -0.35 | -0.02 |
| 2.27 | 0.36  | 0.00  | 0.30  | -0.22 | -0.27 | -0.67 | -0.83 | -0.83 | -0.80 | -0.98 | -1.34 |
| 2.32 | 1.65  | 1.04  | 0.58  | 0.43  | 0.29  | 0.15  | -0.48 | -0.34 | -0.35 | -0.54 | -0.48 |
| 2.37 | 0.71  | 0.84  | 0.21  | 0.46  | 0.05  | 0.04  | -0.54 | -0.43 | -0.49 | -0.40 | -0.74 |
| 2.42 | 0.03  | 0.43  | 0.01  | -0.11 | -0.04 | -0.07 | -0.35 | -0.45 | -0.67 | -0.65 | -0.66 |
| 2.47 | -0.12 | 0.42  | 0.05  | 0.30  | -0.45 | -0.11 | -0.28 | -0.28 | -0.25 | -0.16 | -0.37 |
| 2.52 | 0.45  | 0.95  | 0.15  | -0.08 | 0.37  | 0.01  | -0.11 | -0.80 | -0.21 | -0.14 | -0.56 |
| 2.57 | 0.86  | 0.27  | 0.80  | 0.73  | 0.14  | 0.00  | -0.19 | -0.59 | -0.45 | -0.44 | -0.72 |
| 2.62 | 0.76  | 0.43  | -0.03 | 0.13  | 0.33  | -0.51 | -0.42 | -0.62 | -0.39 | -0.97 | -1.03 |
| 2.67 | 0.20  | 0.55  | -0.63 | -0.42 | -0.01 | -0.68 | -0.35 | -0.36 | -0.47 | -0.60 | -0.69 |
| 2.72 | 0.28  | 0.43  | 0.17  | -0.38 | -0.07 | -0.21 | -0.30 | -0.39 | -0.18 | -0.11 | -0.20 |
| 2.77 | 1.43  | 0.48  | 0.61  | 0.15  | 0.55  | 0.07  | 0.40  | 0.08  | 0.29  | 0.02  | -0.19 |
| 2.82 | 0.38  | 0.25  | 0.54  | -0.14 | 0.19  | -0.75 | -0.44 | -0.86 | -0.89 | -0.87 | -0.68 |
| 2.87 | 0.85  | 0.56  | 0.56  | 0.25  | 0.17  | -0.20 | -0.32 | -0.51 | -0.21 | -0.62 | -0.79 |
| 2.92 | 0.66  | 0.27  | 0.27  | 0.11  | 0.21  | -0.31 | -0.56 | -1.01 | -0.99 | -1.15 | -1.12 |



|       |       |       |       |       |       |       |       |       |       |       |       |
|-------|-------|-------|-------|-------|-------|-------|-------|-------|-------|-------|-------|
| 2.97  | 0.99  | 0.82  | 1.51  | 0.30  | 0.08  | 0.53  | 0.43  | 0.47  | 0.37  | 0.43  | 0.07  |
| 3.02  | 0.31  | 0.43  | 0.32  | 0.16  | 0.41  | 0.29  | 0.11  | -0.24 | -0.08 | -0.35 | 0.08  |
| 3.07  | 1.22  | 0.30  | 0.36  | 0.03  | 0.16  | 0.30  | -0.53 | -0.39 | -0.44 | -0.62 | -0.46 |
| 3.12  | 0.52  | 0.03  | 0.13  | 0.21  | -0.03 | -0.19 | -0.55 | -0.47 | -0.68 | -0.63 | -0.85 |
| 3.17  | 1.40  | 0.72  | 0.92  | 0.20  | 0.43  | 0.32  | -0.29 | -0.35 | -0.20 | -0.58 | -0.88 |
| 3.22  | 0.56  | 0.12  | 0.48  | -0.18 | -0.40 | -0.48 | -0.31 | -0.61 | -0.78 | -0.39 | -0.77 |
| 3.27  | 0.60  | -0.11 | -0.21 | 0.88  | -0.14 | -0.47 | -0.69 | 0.21  | -0.57 | -0.46 | 0.14  |
| 3.32  | 0.67  | -0.10 | 0.16  | 0.26  | -0.02 | -1.02 | -0.86 | -0.61 | -0.40 | -0.54 | -0.43 |
| 3.37  | 0.68  | 1.01  | 0.83  | 0.07  | 0.43  | -0.26 | -0.06 | -0.27 | -0.44 | -0.40 | -0.73 |
| 3.42  | 0.87  | 0.50  | 0.68  | 0.46  | 0.41  | -0.20 | -0.22 | -0.43 | -0.53 | -0.81 | -1.28 |
| 3.47  | -0.16 | 0.14  | 0.05  | -0.72 | -0.38 | -0.59 | -0.92 | -0.67 | -1.05 | -1.07 | -1.30 |
| 3.52  | 0.04  | 1.26  | 0.39  | 0.08  | 0.28  | -0.18 | -0.39 | -0.20 | -0.37 | -0.03 | -0.99 |
| 3.57  | -0.31 | 0.76  | 0.08  | 0.03  | 0.11  | -0.21 | -0.53 | -0.47 | -0.44 | -0.32 | -0.20 |
| 3.62  | 0.82  | 1.25  | 0.95  | 0.51  | 0.49  | 0.30  | -0.10 | -0.02 | 0.09  | -0.53 | -0.31 |
| 3.67  | 1.09  | 0.84  | 0.51  | 0.59  | 0.18  | -0.02 | -0.02 | -0.03 | -0.48 | -0.51 | -0.76 |
| 3.72  | 1.00  | 0.68  | 0.69  | 0.38  | 0.37  | -0.25 | -0.48 | -0.64 | -0.36 | -0.81 | -0.89 |
| 3.92  | 0.76  | 0.84  | 0.77  | 0.65  | 0.01  | -0.15 | 0.03  | -0.36 | -0.29 | -0.35 | -0.53 |
| 4.12  | 0.51  | 0.67  | 0.25  | 0.13  | -0.27 | -0.24 | -0.26 | -0.08 | 0.04  | -0.19 | -0.53 |
| 4.32  | 0.22  | 0.63  | 0.40  | 0.09  | -0.18 | -0.10 | 0.07  | -0.63 | -0.26 | -0.47 | -0.73 |
| 4.52  | 0.32  | 0.42  | 1.09  | 0.28  | 0.62  | -0.30 | -0.51 | -0.35 | -0.20 | -0.63 | -0.57 |
| 4.72  | 1.19  | 1.07  | 0.73  | 0.31  | 0.72  | 0.14  | -0.03 | -0.13 | -0.43 | -0.61 | -0.61 |
| 4.92  | 0.66  | 0.47  | 0.42  | 0.07  | 0.05  | -0.63 | -0.52 | -0.38 | -0.37 | -0.52 | -1.02 |
| 5.12  | 0.86  | 0.03  | 0.57  | 0.06  | 0.55  | 0.10  | -0.18 | -0.41 | -0.11 | -0.39 | -0.24 |
| 5.32  | 0.46  | 1.09  | 0.67  | 0.93  | 0.17  | -0.02 | -0.15 | -0.15 | 0.03  | 0.15  | -0.38 |
| 5.52  | 0.01  | 0.37  | 0.43  | 0.08  | -0.13 | 0.06  | -0.18 | -0.42 | -0.55 | -0.50 | -0.57 |
| 5.72  | 1.10  | 1.31  | 1.04  | 0.42  | 0.55  | 0.34  | -0.22 | 0.10  | -0.01 | -0.57 | -0.54 |
| 5.92  | 0.23  | 0.33  | 0.86  | 0.19  | 0.19  | 0.11  | -0.15 | -0.49 | -0.97 | -0.54 | -0.78 |
| 6.12  | 0.94  | 0.72  | 0.78  | 0.03  | -0.05 | -0.02 | -0.23 | -0.42 | -0.19 | -0.64 | -0.87 |
| 6.32  | 0.52  | 0.71  | 0.42  | 0.39  | -0.01 | 0.06  | 0.25  | -0.16 | -0.34 | -0.15 | -0.34 |
| 6.52  | 0.67  | 0.00  | 0.23  | 0.52  | -0.24 | -0.69 | -0.37 | -0.40 | -0.81 | -0.74 | -0.31 |
| 6.72  | 1.47  | 0.71  | 0.93  | 0.97  | 0.73  | 0.21  | 0.29  | -0.19 | 0.03  | -0.24 | -0.47 |
| 6.92  | 1.09  | 1.19  | 0.43  | 0.35  | 0.65  | -0.15 | -0.40 | -0.32 | -0.41 | -0.55 | -0.62 |
| 7.12  | 0.85  | 0.52  | 0.31  | 0.15  | -0.14 | -0.43 | -0.58 | -0.56 | -0.75 | -0.94 | -1.21 |
| 7.32  | 0.98  | 0.75  | 1.07  | 0.61  | 0.59  | 0.43  | -0.17 | -0.22 | -0.23 | -0.43 | -0.42 |
| 7.52  | 0.54  | 0.05  | -0.10 | -0.41 | -0.05 | -0.79 | -0.64 | -0.38 | -0.38 | -0.72 | -0.53 |
| 7.72  | 1.29  | 0.93  | 0.89  | 0.64  | 0.51  | 0.44  | 0.38  | 0.30  | -0.21 | 0.08  | 0.00  |
| 7.92  | 0.81  | 1.05  | 0.65  | 0.48  | 0.52  | -0.14 | -0.75 | 0.14  | -0.30 | -0.48 | -0.83 |
| 8.12  | 0.96  | 0.70  | 0.54  | 0.48  | 0.21  | -0.31 | -0.87 | -0.53 | -0.84 | -0.93 | -1.08 |
| 8.32  | 1.00  | 0.60  | 0.48  | 0.31  | 0.40  | -0.27 | -0.59 | -0.63 | -0.95 | -1.08 | -1.19 |
| 8.52  | 1.33  | 0.67  | 0.53  | 0.63  | 0.85  | 0.00  | 0.19  | 0.09  | -0.15 | -0.49 | -0.64 |
| 8.72  | 0.24  | 1.10  | 0.35  | -0.05 | 0.25  | -0.28 | -0.27 | 0.39  | -0.62 | -0.55 | -0.37 |
| 8.92  | 0.77  | 0.82  | 0.80  | 0.23  | 0.41  | -0.21 | -0.22 | -0.21 | -0.32 | -0.32 | -0.51 |
| 9.12  | 1.38  | 1.05  | 0.54  | 0.07  | 0.57  | 0.01  | -0.47 | -0.43 | -0.19 | -0.60 | -0.89 |
| 9.32  | 1.63  | 1.18  | 1.04  | 0.90  | 0.68  | 0.37  | 0.13  | -0.34 | -0.25 | -0.21 | -0.57 |
| 9.52  | 1.25  | 0.55  | 0.94  | 0.70  | 0.37  | 0.28  | 0.03  | -0.12 | -0.44 | -0.38 | -0.63 |
| 9.72  | 0.51  | 0.52  | 0.81  | 0.79  | 0.50  | -0.14 | -0.27 | 0.34  | 0.27  | -0.09 | -0.24 |
| 9.92  | 0.87  | 1.69  | 0.85  | 0.99  | 0.71  | 0.63  | 0.22  | 0.35  | 0.39  | 0.01  | 0.07  |
| 10.12 | 0.89  | 0.91  | 0.19  | 0.65  | 0.61  | -0.08 | -0.23 | -0.15 | -0.59 | -0.68 | -0.61 |
| 10.32 | 1.28  | 0.98  | 0.85  | 0.47  | 0.48  | -0.06 | -0.40 | -0.47 | -0.81 | -0.75 | -0.64 |
| 10.52 | 0.86  | 0.65  | 0.25  | 0.46  | -0.28 | -0.28 | -0.58 | -0.25 | -0.64 | -0.99 | -0.93 |

|       |       |       |       |       |       |       |       |       |       |       |       |
|-------|-------|-------|-------|-------|-------|-------|-------|-------|-------|-------|-------|
| 10.72 | 0.98  | 0.67  | 0.56  | 0.53  | 0.24  | 0.26  | 0.00  | 0.32  | 0.10  | -0.01 | -0.43 |
| 10.92 | 0.39  | 0.88  | 0.18  | 0.65  | 0.28  | -0.04 | -0.22 | 0.07  | -0.10 | -0.28 | 0.10  |
| 11.12 | 0.87  | 1.14  | 0.82  | 0.56  | 0.19  | 0.33  | 0.13  | -0.16 | -0.37 | -0.14 | -0.43 |
| 11.32 | 1.70  | 0.37  | 0.78  | 0.36  | 0.17  | 0.01  | -0.07 | -0.36 | -0.72 | -0.48 | -0.47 |
| 11.52 | 0.35  | 0.93  | 0.47  | 0.46  | 0.12  | -0.43 | -0.27 | -0.48 | -0.59 | -1.17 | -0.99 |
| 11.72 | 0.69  | -0.02 | 0.34  | 0.09  | 0.07  | -0.14 | -0.65 | -0.76 | -0.79 | -0.59 | -1.03 |
| 11.92 | 0.06  | -0.33 | 0.11  | -0.37 | -0.03 | -0.47 | -0.79 | -0.76 | -0.60 | -0.94 | -0.78 |
| 12.12 | -0.32 | -0.15 | -0.05 | -0.30 | -0.20 | -0.32 | -0.63 | -0.46 | -0.20 | -0.62 | -0.73 |
| 12.32 | 0.86  | 0.73  | 0.36  | 0.35  | 0.22  | -0.07 | -0.24 | -0.29 | -0.59 | -0.81 | -0.98 |
| 12.52 | 1.36  | 0.60  | 0.72  | 0.58  | 0.61  | -0.14 | -0.38 | -0.34 | -0.25 | -0.71 | -0.61 |
| 12.72 | 1.42  | 0.67  | 0.64  | 0.43  | 0.14  | 0.23  | -0.48 | -0.20 | -0.54 | -0.92 | -0.87 |
| 12.92 | 0.79  | 0.95  | 0.03  | 0.72  | 0.42  | -0.04 | -0.07 | -0.51 | -0.37 | -0.54 | -0.25 |
| 13.12 | 0.33  | 0.44  | 0.92  | 0.33  | 0.06  | 0.41  | -0.01 | 0.08  | 0.18  | -0.36 | -0.21 |
| 13.32 | 1.58  | 2.03  | 1.43  | 0.83  | 1.46  | 0.44  | 0.25  | 0.26  | -0.11 | -0.03 | -0.41 |
| 13.52 | 1.20  | 0.96  | 1.01  | 0.75  | 0.83  | 0.05  | 0.03  | 0.01  | -0.31 | -0.43 | -0.27 |
| 13.72 | 1.71  | 1.48  | 0.89  | 0.60  | 0.74  | 0.57  | 0.26  | -0.09 | -0.16 | -0.58 | -0.60 |
| 13.92 | 1.21  | 0.79  | 1.17  | 0.40  | 0.44  | -0.09 | -0.73 | -0.21 | -0.23 | -0.70 | -0.47 |
| 14    | 0.49  | 0.04  | -0.23 | 0.74  | 0.26  | -0.42 | -0.42 | -0.56 | -0.20 | -0.36 | -0.65 |
| 14.08 | 0.39  | 0.51  | 0.19  | 0.10  | -0.04 | -0.20 | -0.39 | -0.37 | -0.65 | -0.75 | -0.59 |
| 14.17 | 0.46  | 0.44  | 0.11  | 0.03  | -0.30 | -0.11 | -0.30 | -0.58 | -0.51 | -0.86 | -0.71 |
| 14.27 | 0.91  | 0.41  | 0.71  | 0.83  | 0.41  | -0.01 | -0.24 | -0.55 | -0.44 | -0.70 | -0.78 |
| 14.38 | 1.01  | 1.03  | 0.73  | 0.67  | 0.31  | -0.01 | -0.68 | -0.92 | -0.37 | -0.84 | -1.13 |
| 14.49 | 0.76  | 0.98  | 0.46  | 0.05  | 0.22  | -0.04 | -0.38 | -0.47 | -0.50 | -0.56 | -0.61 |
| 14.61 | 1.04  | 1.29  | 0.57  | -0.04 | 0.39  | 0.45  | 0.18  | -0.08 | -0.18 | -0.17 | -0.54 |
| 14.75 | 0.93  | 1.23  | 0.23  | 0.55  | 0.33  | 0.11  | -0.24 | -0.11 | 0.02  | -0.38 | -0.36 |
| 14.89 | 0.60  | 0.84  | 0.85  | 0.68  | 0.32  | -0.34 | -0.50 | -0.05 | -0.52 | -0.82 | -0.95 |
| 15.05 | 1.28  | 1.47  | 0.98  | 0.26  | 0.54  | 0.25  | -0.12 | -0.24 | -0.38 | -0.69 | -1.21 |
| 15.21 | 0.91  | 1.17  | 0.60  | 0.44  | -0.30 | -0.23 | -0.35 | -0.46 | -0.47 | -0.82 | -0.75 |
| 15.39 | 1.00  | 0.69  | 0.97  | 0.45  | 0.60  | 0.17  | -0.08 | -0.09 | -0.31 | 0.12  | -0.64 |
| 15.59 | 0.74  | 0.49  | 0.11  | 0.45  | -0.28 | -0.25 | -0.08 | 0.12  | -0.39 | -0.32 | -0.27 |
| 15.8  | 0.88  | 0.90  | 0.76  | 0.41  | 0.87  | 0.13  | 0.01  | -0.05 | -0.12 | -0.50 | -0.55 |
| 16.02 | 1.15  | 1.14  | 0.56  | 0.51  | 0.17  | 0.05  | -0.74 | -0.26 | -0.31 | -0.64 | -0.76 |
| 16.27 | 1.48  | 0.95  | 0.68  | 0.44  | 0.43  | 0.02  | -0.20 | -0.48 | -0.74 | -0.99 | -1.12 |
| 16.53 | 0.50  | 0.78  | 0.44  | 0.31  | 0.02  | -0.28 | -0.73 | -0.72 | -0.62 | -0.74 | -0.84 |
| 16.81 | 0.74  | 0.44  | 0.54  | -0.04 | 0.32  | 0.19  | 0.48  | 0.03  | 0.07  | 0.01  | -0.08 |
| 17.12 | -0.25 | 0.50  | 0.69  | 0.29  | 0.81  | -0.13 | -0.38 | -0.13 | -0.67 | -0.64 | -0.54 |
| 17.45 | 1.04  | 1.20  | 1.07  | 0.65  | 0.37  | -0.04 | -0.08 | -0.37 | -0.19 | -0.40 | -0.59 |
| 17.81 | 1.17  | 0.97  | 0.78  | 0.33  | -0.01 | 0.03  | -0.21 | -0.32 | -0.37 | -0.88 | -0.42 |
| 18.19 | 1.01  | 0.81  | 1.07  | 0.44  | 0.49  | 0.38  | -0.09 | 0.52  | -0.16 | -0.37 | -0.33 |
| 18.6  | 0.38  | 0.59  | 0.56  | 0.38  | 0.40  | 0.21  | 0.17  | -0.49 | -0.08 | -0.19 | -0.50 |
| 19.05 | 1.23  | 1.41  | 1.08  | 1.05  | 0.28  | 0.49  | 0.61  | 0.40  | 0.22  | 0.36  | 0.42  |
| 19.53 | 0.77  | 1.15  | 0.49  | 0.38  | 0.14  | 0.03  | 0.01  | -0.39 | -0.35 | -0.74 | -0.57 |
| 20.05 | 1.26  | 0.85  | 1.08  | 0.45  | 0.64  | 0.04  | -0.45 | -0.29 | -0.22 | -0.68 | -0.91 |
| 20.61 | 1.04  | 1.01  | 0.57  | 0.54  | 0.27  | 0.08  | -0.36 | -0.58 | -0.68 | -0.64 | -0.28 |
| 21.22 | 0.88  | 1.07  | 0.67  | 0.51  | 0.63  | -0.02 | -0.24 | -0.13 | -0.23 | -0.36 | -0.78 |
| 21.87 | 0.69  | 0.42  | 0.38  | -0.18 | 0.18  | -0.22 | 0.18  | 0.04  | 0.08  | 0.06  | -0.83 |
| 22.57 | 0.73  | 1.28  | 0.76  | 0.93  | 0.16  | 0.41  | -0.12 | -0.06 | -0.33 | -0.32 | -0.03 |
| 23.33 | 0.99  | 0.56  | 0.64  | 0.57  | 0.57  | 0.10  | -0.53 | -0.46 | -0.54 | -0.80 | -0.65 |
| 24.15 | 1.59  | 0.99  | 0.74  | 0.55  | 0.11  | -0.26 | -0.14 | -0.50 | -0.48 | -0.73 | -0.80 |
| 25.03 | 0.93  | 0.78  | 0.46  | 0.46  | 0.39  | 0.54  | -0.07 | -0.53 | -0.42 | -0.64 | -0.74 |

|        |      |      |       |       |       |       |       |       |       |       |       |
|--------|------|------|-------|-------|-------|-------|-------|-------|-------|-------|-------|
| 25.98  | 1.04 | 0.80 | 0.48  | -0.10 | 0.27  | 0.41  | -0.23 | -0.24 | -0.29 | -0.22 | -0.42 |
| 27.01  | 1.51 | 0.98 | 0.83  | 0.99  | 0.51  | 0.47  | 0.26  | 0.05  | 0.39  | 0.21  | -0.04 |
| 28.11  | 0.48 | 0.78 | 0.66  | 0.60  | -0.02 | 0.14  | -0.16 | -0.60 | -0.41 | -0.68 | -0.66 |
| 29.3   | 1.52 | 1.35 | 0.91  | 0.60  | 0.42  | 0.25  | -0.03 | 0.11  | 0.22  | -0.27 | -0.40 |
| 30.59  | 1.46 | 1.13 | 1.15  | 0.67  | 0.60  | 0.38  | -0.16 | 0.16  | -0.03 | -0.66 | -0.91 |
| 31.98  | 0.59 | 0.72 | 0.85  | 0.14  | 0.09  | 0.24  | -0.36 | -0.67 | -0.93 | -0.67 | -0.75 |
| 33.47  | 1.54 | 0.86 | 0.16  | 0.61  | 0.71  | 0.14  | -0.01 | -0.68 | -0.13 | -0.74 | -0.30 |
| 35.09  | 0.88 | 1.04 | 1.02  | -0.06 | 0.62  | 0.01  | -0.23 | -0.05 | -0.40 | -0.62 | -0.47 |
| 36.83  | 0.90 | 0.76 | 0.58  | 0.18  | 0.07  | -0.61 | -0.26 | -0.38 | -0.31 | -0.54 | -0.38 |
| 38.71  | 1.20 | 1.27 | 0.96  | 0.92  | 0.36  | -0.02 | 0.10  | 0.11  | 0.02  | -0.33 | -0.34 |
| 40.73  | 1.41 | 0.85 | 0.72  | 0.72  | 0.38  | 0.27  | -0.21 | -0.06 | -0.30 | -0.62 | -0.91 |
| 42.92  | 1.36 | 0.98 | 0.46  | 0.23  | -0.02 | 0.42  | -0.10 | -0.43 | -0.06 | -0.53 | -0.67 |
| 45.27  | 1.11 | 0.73 | 0.73  | 0.49  | 0.50  | -0.06 | 0.11  | -0.26 | -0.36 | -0.70 | -0.22 |
| 47.81  | 1.30 | 1.45 | 1.15  | 1.03  | 1.04  | 0.81  | 0.38  | -0.53 | -0.04 | -0.09 | 0.01  |
| 50.55  | 0.94 | 0.95 | 0.92  | 0.54  | 0.91  | 0.12  | -0.37 | -0.54 | -0.79 | -0.62 | -0.84 |
| 53.51  | 2.29 | 1.84 | 1.54  | 0.82  | 1.15  | 0.56  | 0.44  | -0.02 | 0.65  | 0.04  | -0.06 |
| 56.69  | 1.15 | 1.26 | 1.02  | 0.92  | 0.83  | 0.44  | -0.35 | 0.19  | -0.14 | -0.32 | -0.68 |
| 60.13  | 1.00 | 1.24 | 1.10  | 0.16  | 0.63  | 0.78  | -0.32 | -0.11 | 0.27  | -0.29 | -0.15 |
| 63.84  | 0.89 | 0.81 | 0.67  | 0.68  | 0.43  | 0.01  | -0.01 | 0.12  | 0.01  | -0.49 | -0.58 |
| 67.83  | 1.62 | 1.41 | 1.25  | 0.67  | 0.71  | 0.00  | -0.15 | -0.30 | -0.55 | -0.23 | -0.35 |
| 72.15  | 1.36 | 1.23 | 1.06  | 0.90  | 0.71  | 0.47  | -0.29 | -0.16 | -0.33 | -0.51 | -0.47 |
| 76.8   | 0.94 | 1.15 | 0.65  | 0.65  | 0.46  | 0.22  | -0.49 | -0.07 | -0.16 | -0.46 | -0.71 |
| 81.81  | 1.10 | 0.65 | 0.32  | 0.12  | 0.46  | -0.39 | -0.21 | -0.24 | -0.33 | -0.53 | -0.95 |
| 87.22  | 0.13 | 0.50 | 0.35  | 0.44  | -0.51 | 0.24  | 0.08  | -0.12 | -0.52 | -0.40 | -0.58 |
| 93.06  | 1.24 | 0.44 | 0.80  | 0.77  | 0.59  | 0.61  | -0.27 | -0.04 | 0.19  | -0.23 | -0.16 |
| 99.35  | 1.04 | 1.07 | 1.00  | 0.26  | -0.28 | 0.32  | 0.04  | -0.43 | -0.52 | -0.92 | -0.83 |
| 106.13 | 1.10 | 1.27 | 1.03  | 0.64  | 0.41  | 0.59  | 0.06  | 0.12  | -0.18 | -0.40 | -0.77 |
| 113.45 | 0.70 | 0.67 | 0.61  | 0.40  | -0.20 | -0.03 | -0.64 | -0.15 | -0.45 | -1.17 | -0.83 |
| 121.34 | 0.65 | 0.48 | 0.11  | 0.46  | 0.29  | 0.07  | -0.34 | -0.32 | -0.71 | -0.36 | -0.66 |
| 129.86 | 0.87 | 1.40 | 0.90  | 0.59  | 0.73  | 0.53  | 0.31  | 0.33  | 0.31  | -0.37 | 0.18  |
| 139.04 | 1.01 | 0.45 | -0.12 | 0.68  | 0.46  | 0.22  | 0.03  | -0.13 | -0.53 | -0.18 | -0.57 |
| 148.94 | 1.45 | 1.21 | 1.02  | 0.22  | 0.85  | 0.42  | -0.47 | -0.41 | -0.48 | -0.62 | -0.78 |
| 159.62 | 0.85 | 0.99 | 0.54  | 0.22  | -0.03 | -0.16 | -0.43 | -0.36 | -0.55 | -0.86 | -0.99 |
| 171.14 | 0.49 | 0.59 | 0.53  | -0.41 | 0.11  | -0.26 | -0.49 | -0.50 | -0.47 | -0.76 | -0.80 |
| 183.56 | 0.79 | 0.65 | 0.74  | 0.45  | 0.37  | 0.08  | 0.18  | 0.06  | -0.39 | -0.11 | -0.69 |
| 196.96 | 0.93 | 0.94 | 0.58  | 0.03  | 0.52  | -0.46 | -0.35 | -0.23 | -0.66 | -0.59 | -0.82 |
| 211.41 | 0.68 | 0.93 | 0.19  | 0.23  | 0.43  | 0.01  | -0.32 | -0.41 | -0.38 | -0.84 | -0.73 |
| 226.99 | 0.76 | 1.27 | 0.60  | 0.20  | 0.10  | 0.00  | -0.55 | -0.62 | -0.41 | -0.94 | -0.97 |
| 243.8  | 0.66 | 0.61 | 0.94  | 0.63  | 0.12  | -0.29 | 0.07  | -0.25 | -0.37 | -0.81 | -0.90 |
| 261.93 | 1.34 | 1.02 | 0.88  | 0.51  | 0.41  | 0.36  | -0.53 | -0.35 | 0.23  | -0.06 | -0.63 |
| 281.48 | 0.97 | 0.39 | 0.39  | -0.07 | 0.56  | 0.29  | -0.15 | 0.02  | -0.15 | -0.44 | -0.97 |
| 302.56 | 1.28 | 0.93 | 1.11  | 0.63  | 0.06  | -0.09 | 0.30  | -0.22 | -0.45 | -0.50 | -0.50 |
| 325.3  | 1.00 | 1.31 | 0.55  | 0.95  | 0.36  | 0.15  | -0.50 | -0.15 | -0.29 | -0.43 | -0.66 |
| 349.83 | 1.15 | 0.57 | 0.50  | 0.08  | -0.29 | -0.14 | -0.20 | -0.34 | -0.66 | -0.69 | -0.90 |
| 376.28 | 1.33 | 0.66 | 0.30  | 0.32  | 0.28  | -0.20 | -0.62 | -0.35 | -0.57 | -0.47 | -0.84 |
| 404.81 | 0.59 | 0.00 | -0.13 | 0.29  | 0.11  | -0.10 | -0.60 | -0.70 | -0.45 | -0.71 | -0.68 |
| 435.58 | 0.95 | 0.68 | 0.19  | 0.88  | 0.74  | 0.61  | -0.35 | -0.15 | -0.24 | -0.17 | -0.45 |
| 468.76 | 0.98 | 1.12 | 0.43  | 0.40  | 0.26  | -0.04 | -0.16 | -0.56 | -0.44 | -0.60 | -0.84 |
| 504.55 | 1.37 | 1.37 | 0.63  | 0.48  | 0.40  | 0.14  | -0.10 | -0.54 | -0.81 | -0.86 | -0.86 |
| 543.15 | 2.05 | 0.78 | 1.26  | 0.72  | 0.52  | 0.30  | -0.31 | -0.27 | -0.45 | -0.69 | -1.03 |

|         |       |       |       |       |       |       |       |       |       |       |       |
|---------|-------|-------|-------|-------|-------|-------|-------|-------|-------|-------|-------|
| 584.78  | 0.45  | 0.19  | 0.53  | -0.32 | 0.16  | -0.41 | -0.74 | -0.65 | -0.96 | -1.02 | -1.18 |
| 629.68  | 0.73  | 0.70  | 0.51  | 0.34  | -0.33 | -0.06 | -0.41 | -0.41 | -0.25 | -0.81 | -1.12 |
| 678.1   | -0.05 | 0.07  | 0.33  | -0.16 | -0.71 | -0.89 | -0.60 | -0.94 | -0.66 | -1.53 | -1.60 |
| 730.33  | 0.88  | 1.10  | 0.24  | 0.23  | -0.12 | -0.15 | -0.57 | -0.60 | -0.97 | -0.94 | -1.20 |
| 786.65  | 1.38  | 1.04  | 0.49  | -0.08 | 0.14  | -0.52 | -0.68 | -0.73 | -0.74 | -0.98 | -0.91 |
| 847.4   | 0.83  | 0.36  | 0.62  | 0.39  | -0.21 | -0.16 | -0.80 | -0.87 | -0.64 | -0.97 | -1.15 |
| 912.92  | 0.12  | 0.39  | 0.36  | -0.04 | 0.27  | -0.21 | -0.57 | -0.41 | -0.49 | -0.60 | -0.64 |
| 983.58  | 0.82  | 0.85  | 0.31  | 0.08  | -0.17 | -0.35 | -0.03 | -0.44 | -0.60 | -0.51 | -1.01 |
| 1059.78 | -0.02 | 0.07  | -0.20 | -0.35 | -0.42 | -0.64 | -1.07 | -1.14 | -1.17 | -1.31 | -1.28 |
| 1141.98 | 0.48  | 0.91  | 0.58  | 0.16  | -0.62 | -0.48 | -0.65 | -0.77 | -0.89 | -1.21 | -1.03 |
| 1230.62 | 0.27  | -0.05 | 0.22  | -0.21 | -0.31 | -0.66 | -1.01 | -0.92 | -1.45 | -1.36 | -1.19 |
| 1326.23 | -0.08 | 0.73  | -0.42 | -0.44 | -0.09 | -0.97 | -1.10 | -1.24 | -1.02 | -1.27 | -1.26 |
| 1429.34 | 0.77  | 0.43  | 0.16  | 0.14  | 0.02  | -0.07 | -0.57 | -0.81 | -0.84 | -0.71 | -0.71 |
| 1540.54 | 0.22  | 0.31  | 0.57  | -0.13 | -0.09 | -0.67 | -1.05 | -0.93 | -1.11 | -0.98 | -1.01 |
| 1660.48 | 1.75  | 0.51  | 0.50  | 0.04  | 0.46  | -0.58 | -0.89 | -1.10 | -1.26 | -1.27 | -1.44 |
| 1789.83 | 1.07  | 0.52  | 0.65  | 0.38  | 0.00  | -0.59 | -0.46 | -0.70 | -0.91 | -1.24 | -1.25 |
| 1929.34 | 0.37  | 0.70  | 0.08  | 0.13  | -0.27 | -0.27 | -1.02 | -0.83 | -1.28 | -1.58 | -1.36 |
| 2079.8  | -0.06 | 0.53  | 0.27  | 0.41  | 0.02  | -0.56 | -0.50 | -0.36 | -0.20 | -0.58 | -0.41 |
| 2242.08 | 0.76  | 0.43  | 0.60  | -0.46 | 0.28  | -0.78 | -0.39 | -0.75 | -0.63 | -0.60 | -1.22 |
| 2417.1  | 0.68  | 0.18  | 0.44  | 0.13  | -0.16 | -0.74 | -1.03 | -0.57 | -1.05 | -1.50 | -1.49 |
| 2605.85 | 0.47  | 0.25  | 0.61  | -0.15 | -0.12 | -0.75 | -0.85 | -1.15 | -1.19 | -1.51 | -1.38 |
| 2809.43 | 0.90  | 1.16  | 0.14  | -0.39 | -0.26 | -0.55 | -1.25 | -1.09 | -1.18 | -1.65 | -1.93 |
| 3028.99 | 0.33  | 0.03  | 0.38  | -0.34 | -0.35 | -0.54 | -0.65 | -1.02 | -0.63 | -0.75 | -1.14 |
| 3265.79 | 0.09  | 0.08  | 0.01  | -0.04 | -0.41 | 0.39  | -0.48 | -0.47 | 0.19  | -0.18 | -0.76 |
| 3521.18 | 1.57  | 0.72  | 0.98  | -0.01 | 0.48  | 0.00  | -0.30 | -0.51 | -0.62 | -0.57 | -0.70 |
| 3796.62 | 1.19  | 0.58  | 0.48  | 0.41  | -0.12 | -0.33 | -0.82 | -0.81 | -1.21 | -1.10 | -1.21 |

| Wavelength (nm) | 351.69 | 353.10 | 354.51 | 355.92 | 357.33 | 358.73 | 360.14 | 361.55 | 362.96 | 364.37 | 365.78 |
|-----------------|--------|--------|--------|--------|--------|--------|--------|--------|--------|--------|--------|
| Time (ps)       |        |        |        |        |        |        |        |        |        |        |        |
| -3.28           | 0.02   | -0.30  | 0.00   | -0.15  | -0.04  | 0.01   | -0.15  | -0.18  | 0.15   | -0.11  | -0.27  |
| -2.78           | 0.13   | -0.48  | -0.17  | 0.01   | 0.02   | 0.24   | 0.14   | 0.01   | -0.26  | 0.07   | 0.17   |
| -2.28           | -0.16  | 0.23   | 0.04   | 0.03   | -0.08  | -0.22  | 0.17   | 0.14   | 0.06   | -0.23  | 0.05   |
| -1.78           | -0.14  | 0.22   | -0.23  | 0.09   | -0.11  | 0.34   | -0.10  | -0.08  | -0.12  | 0.05   | 0.30   |
| -1.28           | 0.03   | 0.06   | 0.13   | 0.13   | 0.26   | 0.27   | 0.22   | 0.33   | 0.22   | 0.30   | 0.04   |
| -0.78           | 0.29   | 0.34   | 0.13   | 0.12   | 0.01   | 0.08   | -0.19  | -0.27  | -0.14  | 0.11   | 0.07   |
| -0.28           | 0.08   | 0.10   | 0.25   | -0.08  | 0.04   | 0.00   | 0.20   | 0.27   | 0.38   | 0.19   | 0.00   |
| 0.22            | -0.25  | -0.17  | -0.16  | -0.15  | -0.10  | -0.71  | -0.31  | -0.21  | -0.31  | -0.37  | -0.36  |
| 0.32            | 0.29   | 0.21   | -0.45  | 0.30   | 0.23   | 0.11   | 0.04   | -0.03  | 0.06   | 0.00   | 0.02   |
| 0.42            | 0.16   | 0.06   | 0.13   | -0.11  | 0.13   | 0.11   | 0.39   | -0.19  | -0.17  | 0.26   | 0.02   |
| 0.52            | 0.13   | -0.14  | -0.18  | -0.29  | -0.05  | 0.22   | 0.33   | 0.14   | 0.39   | 0.28   | 0.10   |
| 0.62            | -0.47  | -0.30  | 0.15   | 0.11   | -0.08  | 0.17   | 0.14   | -0.03  | -0.17  | -0.33  | -0.01  |
| 0.72            | -2.05  | -2.31  | -2.45  | -2.80  | -2.49  | -2.19  | -1.10  | -0.61  | 0.05   | 0.44   | 0.35   |
| 0.77            | -0.94  | -1.35  | -1.77  | -1.63  | -1.54  | -1.40  | -1.26  | -0.96  | -0.71  | -0.45  | -0.33  |
| 0.82            | -0.47  | -0.32  | -0.16  | -0.50  | -0.39  | -0.45  | -0.64  | -1.12  | -0.95  | -1.38  | -1.08  |
| 0.87            | -0.75  | -0.96  | -0.61  | -0.39  | -0.15  | -0.21  | -0.11  | 0.14   | 0.15   | 0.25   | 0.29   |
| 0.92            | -0.95  | -1.16  | -1.15  | -0.95  | -0.60  | -0.25  | 0.20   | 0.29   | 0.42   | 0.54   | 0.74   |
| 0.97            | -0.95  | -0.84  | -0.86  | -1.08  | -0.41  | -0.21  | 0.10   | -0.07  | 0.36   | 0.54   | 0.87   |
| 1.02            | -0.73  | -0.43  | -0.57  | -0.67  | -0.08  | -0.25  | 0.07   | 0.37   | 0.71   | 0.95   | 1.21   |
| 1.07            | -0.52  | -0.20  | -0.49  | -0.20  | -0.35  | 0.25   | 0.81   | 0.46   | 0.84   | 1.38   | 1.37   |
| 1.12            | -0.54  | -0.48  | -0.25  | -0.24  | -0.04  | -0.01  | 0.60   | 0.42   | 0.61   | 0.89   | 1.00   |

|      |       |       |       |       |       |       |       |       |       |       |       |
|------|-------|-------|-------|-------|-------|-------|-------|-------|-------|-------|-------|
| 1.17 | -1.10 | -1.21 | -1.05 | -0.58 | -0.65 | -0.52 | -0.18 | -0.40 | -0.25 | -0.02 | 0.56  |
| 1.22 | -1.33 | -1.46 | -1.29 | -1.07 | -1.09 | -1.27 | -0.69 | -0.63 | -0.51 | -0.61 | -0.43 |
| 1.27 | -0.73 | -0.78 | -0.69 | -0.75 | -0.51 | 0.00  | 0.04  | 0.11  | 0.16  | 0.36  | 0.53  |
| 1.32 | -0.05 | -0.10 | 0.00  | 0.12  | 0.57  | 0.50  | 0.75  | 0.75  | 1.13  | 1.01  | 1.15  |
| 1.37 | -0.55 | -0.53 | -0.51 | -0.32 | -0.14 | -0.20 | -0.07 | -0.15 | 0.39  | 0.64  | 0.79  |
| 1.42 | -0.85 | -0.83 | -1.09 | -1.06 | -0.41 | -0.86 | -0.59 | -0.47 | -0.14 | -0.07 | 0.14  |
| 1.47 | -1.51 | -1.35 | -1.38 | -0.99 | -1.15 | -1.01 | -0.73 | -0.76 | -0.15 | -0.47 | -0.01 |
| 1.52 | -1.99 | -1.69 | -1.77 | -1.46 | -1.44 | -1.23 | -1.31 | -0.87 | -0.61 | -0.55 | -0.22 |
| 1.57 | -0.28 | -0.37 | -0.39 | -0.71 | -0.29 | -0.11 | 0.26  | 0.30  | 0.35  | 0.60  | 0.76  |
| 1.62 | -0.45 | -0.42 | -0.16 | -0.22 | 0.20  | 0.36  | 0.62  | 0.70  | 0.38  | 1.03  | 1.08  |
| 1.67 | -0.16 | -0.52 | -0.22 | -0.44 | 0.08  | 0.05  | 0.33  | 0.47  | 0.55  | 0.55  | 0.62  |
| 1.72 | -0.43 | -0.83 | -0.81 | -0.70 | -0.54 | -0.64 | -0.13 | -0.13 | -0.28 | -0.05 | -0.06 |
| 1.77 | -1.10 | -0.89 | -1.24 | -1.12 | -1.06 | -0.79 | -0.84 | -0.63 | -0.59 | -0.50 | -0.40 |
| 1.82 | -1.19 | -0.99 | -0.79 | -0.94 | -0.44 | -0.70 | -0.35 | 0.06  | -0.12 | -0.15 | 0.29  |
| 1.87 | -0.20 | 0.01  | 0.15  | -0.09 | 0.14  | 0.24  | 0.67  | 0.75  | 0.56  | 0.91  | 1.07  |
| 1.92 | -0.42 | -0.79 | -0.55 | -0.23 | 0.02  | -0.19 | 0.28  | 0.30  | 0.55  | 0.76  | 0.84  |
| 1.97 | -0.46 | -0.23 | -0.20 | -0.11 | -0.08 | 0.20  | 0.25  | 0.07  | 0.34  | 0.51  | 0.71  |
| 2.02 | -0.89 | -0.87 | -0.96 | -0.61 | -0.68 | -0.63 | -0.39 | -0.26 | -0.05 | -0.04 | 0.39  |
| 2.07 | -1.12 | -1.21 | -0.94 | -0.83 | -0.88 | -1.01 | -0.73 | -0.23 | -0.37 | -0.28 | -0.06 |
| 2.12 | -0.34 | -0.25 | -0.19 | -0.14 | -0.37 | -0.10 | 0.39  | 0.22  | 0.54  | 0.82  | 1.02  |
| 2.17 | -0.41 | -0.26 | -0.18 | -0.06 | 0.02  | 0.30  | 0.50  | 0.68  | 0.79  | 0.96  | 1.35  |
| 2.22 | -0.24 | 0.15  | -0.24 | -0.26 | -0.08 | -0.18 | 0.67  | 0.62  | 0.98  | 1.22  | 0.70  |
| 2.27 | -1.40 | -1.13 | -1.34 | -1.17 | -0.86 | -0.75 | -0.62 | -0.53 | -0.34 | -0.16 | 0.29  |
| 2.32 | -0.73 | -1.21 | -0.77 | -0.85 | -0.76 | -0.60 | -0.32 | -0.52 | -0.31 | -0.12 | 0.30  |
| 2.37 | -0.61 | -0.84 | -0.59 | -0.75 | -0.39 | -0.60 | -0.16 | -0.33 | -0.11 | 0.06  | 0.53  |
| 2.42 | -0.87 | -0.71 | -0.39 | -0.63 | -0.25 | -0.31 | 0.10  | -0.01 | 0.44  | 0.45  | 0.72  |
| 2.47 | -0.38 | -0.45 | -0.27 | 0.11  | -0.05 | 0.14  | 0.52  | 0.59  | 0.46  | 0.90  | 1.28  |
| 2.52 | -0.66 | -0.33 | -0.82 | -0.61 | -0.05 | -0.46 | -0.32 | 0.15  | 0.14  | -0.08 | 0.77  |
| 2.57 | -0.97 | -1.12 | -0.94 | -0.99 | -0.69 | -0.45 | -0.09 | -0.03 | 0.10  | 0.07  | 0.31  |
| 2.62 | -1.16 | -1.31 | -1.31 | -1.23 | -1.35 | -1.09 | -0.96 | -0.62 | -0.68 | -0.64 | -0.36 |
| 2.67 | -0.47 | -0.71 | -0.39 | -0.58 | -0.39 | -0.26 | 0.01  | 0.16  | 0.13  | 0.40  | 0.48  |
| 2.72 | -0.44 | -0.16 | -0.13 | -0.02 | 0.05  | 0.53  | 0.62  | 0.84  | 0.43  | 1.00  | 1.45  |
| 2.77 | -0.20 | -0.09 | -0.04 | -0.09 | 0.41  | 0.38  | 0.60  | 0.80  | 0.67  | 1.01  | 1.14  |
| 2.82 | -1.42 | -1.39 | -1.18 | -1.29 | -0.85 | -0.83 | -0.76 | -0.54 | -0.40 | -0.24 | -0.02 |
| 2.87 | -0.62 | -0.73 | -0.90 | -0.64 | -0.43 | -0.38 | -0.35 | -0.09 | -0.20 | 0.06  | 0.31  |
| 2.92 | -1.12 | -1.27 | -1.02 | -1.26 | -1.08 | -0.80 | -0.44 | -0.67 | -0.12 | -0.38 | -0.28 |
| 2.97 | 0.22  | 0.02  | -0.10 | 0.07  | 0.20  | 0.03  | 0.40  | 0.52  | 0.60  | 0.92  | 0.48  |
| 3.02 | -0.04 | -0.23 | 0.05  | 0.00  | 0.25  | 0.39  | 0.61  | 0.80  | 0.78  | 1.06  | 1.25  |
| 3.07 | -0.60 | -0.78 | -0.57 | -0.37 | -0.30 | -0.23 | 0.17  | 0.16  | 0.26  | 0.35  | 0.60  |
| 3.12 | -1.04 | -1.01 | -1.10 | -1.08 | -0.95 | -0.75 | -0.50 | -0.46 | -0.07 | -0.19 | 0.13  |
| 3.17 | -0.64 | -1.19 | -0.99 | -1.05 | -0.53 | -0.94 | -0.56 | -0.53 | -0.37 | -0.42 | -0.27 |
| 3.22 | -0.92 | -0.68 | -0.52 | -0.60 | -0.29 | -0.19 | -0.04 | -0.11 | 0.26  | 0.42  | 0.53  |
| 3.27 | -0.39 | -0.89 | -0.24 | -0.05 | 0.22  | 0.24  | 0.79  | 0.65  | 0.64  | 1.07  | 1.34  |
| 3.32 | -1.17 | -0.62 | -0.46 | -0.34 | -0.35 | -0.43 | 0.09  | -0.04 | 0.10  | 0.58  | 1.06  |
| 3.37 | -0.72 | -1.03 | -0.67 | -0.99 | -0.36 | -0.32 | -0.13 | -0.32 | 0.10  | 0.19  | 0.44  |
| 3.42 | -0.85 | -1.18 | -0.79 | -0.97 | -0.64 | -0.83 | -0.22 | -0.18 | 0.14  | 0.16  | 0.23  |
| 3.47 | -1.59 | -1.53 | -1.69 | -1.45 | -1.33 | -1.16 | -0.88 | -0.78 | -0.88 | -0.60 | -0.30 |
| 3.52 | -0.45 | -0.50 | -0.58 | -0.46 | 0.05  | -0.07 | 0.32  | 0.16  | 0.59  | 0.36  | 0.56  |
| 3.57 | -0.41 | -0.01 | 0.05  | -0.05 | 0.12  | 0.57  | 0.56  | 0.82  | 0.79  | 0.99  | 1.35  |
| 3.62 | -0.58 | -0.17 | -0.39 | -0.53 | -0.07 | -0.02 | 0.35  | 0.04  | 0.36  | 0.49  | 0.61  |

|       |       |       |       |       |       |       |       |       |       |       |       |
|-------|-------|-------|-------|-------|-------|-------|-------|-------|-------|-------|-------|
| 3.67  | -0.64 | -0.87 | -0.71 | -0.96 | -0.73 | -0.76 | -0.35 | -0.20 | -0.21 | 0.08  | 0.57  |
| 3.72  | -1.42 | -1.35 | -1.40 | -1.25 | -1.08 | -1.36 | -0.92 | -1.14 | -0.93 | -0.39 | -0.22 |
| 3.92  | -0.86 | -1.05 | -0.62 | -0.62 | -0.32 | -0.47 | -0.13 | 0.23  | 0.21  | 0.07  | 0.32  |
| 4.12  | -0.07 | -0.16 | 0.08  | -0.06 | -0.15 | -0.01 | 0.30  | 0.47  | 0.65  | 0.72  | 1.04  |
| 4.32  | -0.28 | -0.73 | -0.71 | -0.22 | 0.14  | 0.00  | 0.27  | 0.15  | 0.42  | 1.04  | 1.13  |
| 4.52  | -0.50 | -0.85 | -0.87 | -0.96 | -0.75 | -0.69 | -0.30 | -0.31 | -0.25 | 0.17  | 0.40  |
| 4.72  | -0.91 | -0.85 | -1.02 | -0.94 | -0.88 | -0.66 | -0.27 | -0.56 | -0.16 | 0.24  | 0.28  |
| 4.92  | -0.84 | -0.99 | -1.23 | -0.93 | -0.83 | -0.73 | -0.37 | -0.47 | -0.42 | -0.56 | -0.13 |
| 5.12  | -0.16 | -0.61 | -0.66 | -0.47 | -0.37 | -0.05 | 0.05  | -0.10 | 0.60  | 0.47  | 0.68  |
| 5.32  | -0.58 | -0.04 | 0.11  | 0.10  | 0.28  | 0.39  | 0.66  | 0.80  | 0.83  | 1.20  | 1.17  |
| 5.52  | -0.57 | -0.57 | -0.92 | -0.25 | -0.19 | -0.27 | 0.14  | 0.25  | 0.34  | 0.88  | 1.04  |
| 5.72  | -0.40 | -0.63 | -0.63 | -0.70 | -0.50 | -0.53 | 0.14  | -0.36 | -0.15 | 0.16  | 0.33  |
| 5.92  | -1.05 | -1.02 | -0.62 | -0.91 | -0.64 | -0.72 | -0.28 | -0.43 | -0.01 | -0.03 | 0.16  |
| 6.12  | -1.16 | -0.83 | -1.00 | -1.01 | -0.58 | -0.44 | -0.08 | -0.36 | -0.02 | -0.23 | 0.19  |
| 6.32  | -0.23 | -0.21 | -0.47 | -0.34 | 0.01  | -0.06 | 0.31  | 0.30  | 0.52  | 0.48  | 1.39  |
| 6.52  | -0.44 | -0.46 | -0.08 | -0.28 | 0.04  | 0.19  | 0.37  | 0.28  | 0.74  | 0.60  | 0.83  |
| 6.72  | -0.20 | -0.17 | -0.24 | -0.39 | -0.28 | -0.15 | -0.05 | 0.18  | 0.32  | 0.42  | 0.46  |
| 6.92  | -0.80 | -0.87 | -0.61 | -0.79 | -0.42 | -0.69 | -0.46 | -0.21 | -0.27 | -0.03 | 0.35  |
| 7.12  | -1.07 | -1.53 | -1.42 | -1.42 | -0.95 | -1.16 | -0.86 | -0.94 | -0.77 | -0.68 | -0.30 |
| 7.32  | -0.35 | -0.56 | -0.17 | -0.23 | -0.44 | 0.06  | 0.20  | 0.33  | 0.59  | 0.70  | 0.61  |
| 7.52  | -0.38 | -0.22 | -0.55 | -0.26 | -0.30 | -0.11 | 0.16  | 0.52  | 0.49  | 0.47  | 0.69  |
| 7.72  | -0.56 | -0.23 | -0.44 | -0.09 | 0.36  | 0.05  | 0.38  | 0.63  | 0.66  | 0.57  | 1.18  |
| 7.92  | -0.99 | -1.13 | -1.04 | -0.89 | -0.91 | -0.96 | -0.46 | -0.37 | -0.26 | 0.08  | 0.35  |
| 8.12  | -1.07 | -1.02 | -1.08 | -1.03 | -1.08 | -0.98 | -0.52 | -0.46 | -0.20 | -0.22 | 0.04  |
| 8.32  | -1.16 | -1.71 | -1.29 | -1.32 | -1.16 | -1.16 | -0.83 | -0.64 | -0.58 | -0.72 | -0.02 |
| 8.52  | -0.60 | -0.49 | -0.09 | -0.74 | -0.26 | -0.12 | 0.03  | 0.27  | 0.70  | 0.45  | 0.67  |
| 8.72  | -0.49 | -0.46 | -0.44 | -0.37 | -0.25 | -0.31 | 0.55  | 0.31  | 0.67  | 0.60  | 1.02  |
| 8.92  | -0.47 | -0.18 | -0.38 | -0.62 | -0.24 | -0.24 | 0.15  | 0.16  | 0.53  | 0.45  | 0.54  |
| 9.12  | -0.89 | -0.83 | -1.06 | -0.69 | -0.65 | -0.51 | -0.44 | -0.62 | 0.14  | 0.24  | 0.16  |
| 9.32  | -0.62 | -0.77 | -0.84 | -0.97 | -0.67 | -0.59 | -0.52 | -0.60 | -0.04 | -0.15 | 0.00  |
| 9.52  | -0.49 | -0.35 | -0.44 | -0.35 | -0.53 | -0.32 | -0.27 | -0.24 | 0.16  | 0.25  | 0.57  |
| 9.72  | -0.16 | -0.33 | -0.18 | -0.27 | -0.24 | 0.25  | 0.36  | 0.34  | 0.40  | 0.82  | 1.23  |
| 9.92  | -0.30 | -0.35 | 0.04  | -0.05 | 0.15  | -0.04 | 0.48  | 0.59  | 0.51  | 0.93  | 1.12  |
| 10.12 | -0.86 | -0.93 | -1.05 | -0.52 | -0.48 | -0.77 | -0.30 | -0.08 | 0.02  | -0.06 | 0.45  |
| 10.32 | -0.85 | -0.82 | -0.96 | -1.04 | -0.71 | -0.84 | -0.44 | -0.09 | -0.15 | -0.13 | 0.39  |
| 10.52 | -0.93 | -1.10 | -1.23 | -1.07 | -0.98 | -1.08 | -0.49 | -0.82 | -0.47 | -0.57 | -0.27 |
| 10.72 | -0.35 | -0.15 | -0.41 | -0.29 | 0.35  | 0.04  | 0.56  | 0.54  | 0.42  | 0.90  | 1.01  |
| 10.92 | -0.08 | -0.58 | -0.23 | -0.05 | 0.17  | 0.37  | 0.64  | 0.26  | 1.01  | 1.10  | 1.21  |
| 11.12 | -0.36 | -0.34 | -0.02 | -0.31 | -0.23 | -0.04 | 0.15  | 0.51  | 0.58  | 0.85  | 0.66  |
| 11.32 | -0.83 | -0.87 | -0.38 | -0.88 | -0.28 | -0.63 | -0.19 | -0.11 | 0.22  | 0.14  | 0.62  |
| 11.52 | -0.90 | -1.19 | -1.08 | -1.27 | -1.02 | -0.85 | -0.74 | -0.40 | -0.53 | -0.29 | -0.05 |
| 11.72 | -1.14 | -0.93 | -1.07 | -1.16 | -0.22 | -0.71 | -0.62 | -0.53 | 0.06  | 0.13  | 0.10  |
| 11.92 | -0.89 | -1.14 | -1.15 | -0.64 | -0.61 | -0.45 | -0.29 | -0.16 | 0.08  | 0.35  | 0.61  |
| 12.12 | -0.53 | -0.78 | -0.73 | -0.55 | -0.39 | -0.30 | -0.26 | -0.07 | 0.32  | 0.45  | 0.73  |
| 12.32 | -0.53 | -0.96 | -0.63 | -0.48 | -0.33 | -0.64 | 0.08  | -0.38 | 0.08  | -0.08 | 0.15  |
| 12.52 | -0.78 | -0.83 | -0.76 | -0.99 | -0.99 | -0.44 | -0.32 | -0.35 | -0.11 | -0.31 | 0.17  |
| 12.72 | -0.80 | -1.09 | -0.91 | -1.19 | -0.75 | -0.89 | -0.66 | -0.66 | -0.46 | -0.53 | -0.18 |
| 12.92 | -0.74 | -0.73 | -0.58 | -0.23 | -0.41 | -0.25 | 0.09  | 0.10  | 0.39  | 0.64  | 0.77  |
| 13.12 | -0.39 | 0.09  | -0.19 | -0.17 | 0.26  | -0.16 | 0.61  | 0.33  | 0.78  | 0.78  | 0.97  |
| 13.32 | -0.41 | -0.44 | -0.18 | -0.39 | -0.16 | 0.21  | 0.37  | 0.37  | 0.53  | 0.83  | 0.64  |

|       |       |       |       |       |       |       |       |       |       |       |       |
|-------|-------|-------|-------|-------|-------|-------|-------|-------|-------|-------|-------|
| 13.52 | -0.78 | -0.53 | -0.90 | -0.83 | -0.62 | -0.58 | -0.20 | 0.10  | 0.15  | 0.04  | 0.40  |
| 13.72 | -0.75 | -0.85 | -0.82 | -0.98 | -0.91 | -0.63 | -0.33 | -0.46 | 0.06  | 0.11  | 0.20  |
| 13.92 | -0.63 | -0.91 | -1.14 | -0.95 | -0.81 | -0.75 | -0.43 | -0.13 | 0.03  | -0.07 | 0.15  |
| 14.00 | -0.63 | -0.31 | -0.27 | -0.75 | -0.58 | -0.16 | 0.34  | 0.17  | 0.39  | 0.83  | 0.70  |
| 14.08 | -0.28 | -0.79 | -0.51 | -0.50 | -0.39 | -0.11 | 0.47  | 0.47  | 0.56  | 0.74  | 1.18  |
| 14.17 | -0.90 | -1.12 | -0.93 | -0.77 | -0.49 | -0.51 | -0.34 | -0.33 | -0.07 | 0.15  | 0.20  |
| 14.27 | -0.86 | -0.58 | -1.03 | -0.79 | -0.38 | -0.63 | 0.21  | 0.00  | 0.20  | 0.42  | 0.57  |
| 14.38 | -0.83 | -1.23 | -0.61 | -1.35 | -1.12 | -0.92 | -1.02 | -0.53 | -0.51 | -0.49 | -0.32 |
| 14.49 | -0.75 | -0.64 | -0.52 | -0.60 | -0.52 | -0.54 | -0.22 | -0.17 | 0.03  | 0.20  | 0.46  |
| 14.61 | -0.19 | -0.26 | -0.53 | -0.34 | 0.11  | 0.32  | 0.33  | 0.39  | 0.82  | 0.88  | 1.02  |
| 14.75 | -0.55 | -0.47 | -0.56 | -0.20 | -0.20 | -0.31 | 0.24  | 0.24  | 0.25  | 0.53  | 0.68  |
| 14.89 | -1.08 | -0.72 | -0.78 | -0.58 | -0.57 | -0.50 | -0.24 | -0.06 | 0.05  | 0.01  | 0.32  |
| 15.05 | -1.19 | -1.01 | -1.00 | -0.69 | -0.75 | -0.93 | -0.57 | -0.32 | -0.17 | -0.06 | 0.33  |
| 15.21 | -1.14 | -1.28 | -1.22 | -1.01 | -0.88 | -1.04 | -0.72 | -0.49 | -0.58 | -0.26 | -0.16 |
| 15.39 | 0.02  | -0.63 | -0.34 | -0.10 | -0.36 | 0.16  | 0.53  | 0.40  | 0.52  | 0.37  | 0.80  |
| 15.59 | -0.36 | -0.46 | -0.13 | -0.14 | -0.19 | -0.02 | 0.40  | 0.41  | 0.56  | 0.14  | 0.86  |
| 15.8  | -0.59 | -1.02 | -0.42 | -0.24 | -0.34 | -0.29 | 0.04  | 0.21  | 0.13  | 0.28  | 0.34  |
| 16.02 | -0.65 | -0.78 | -0.66 | -0.66 | -0.64 | -0.62 | -0.27 | -0.10 | 0.21  | 0.21  | 0.51  |
| 16.27 | -1.26 | -0.96 | -1.03 | -1.29 | -1.13 | -1.03 | -0.70 | -0.43 | -0.32 | -0.44 | -0.08 |
| 16.53 | -0.73 | -0.92 | -0.85 | -1.08 | -0.87 | -0.60 | -0.24 | -0.35 | -0.32 | -0.13 | 0.29  |
| 16.81 | 0.08  | -0.09 | -0.11 | -0.27 | -0.12 | 0.05  | 0.31  | 0.36  | 0.63  | 0.61  | 1.14  |
| 17.12 | -0.86 | -0.70 | -0.94 | -0.57 | -0.72 | -0.27 | 0.12  | -0.01 | 0.27  | 0.43  | 0.92  |
| 17.45 | -0.87 | -0.50 | -0.39 | -0.40 | -0.16 | -0.20 | 0.19  | -0.01 | 0.20  | 0.61  | 0.63  |
| 17.81 | -1.26 | -0.74 | -1.04 | -0.77 | -0.67 | -0.56 | -0.29 | -0.31 | 0.20  | -0.01 | 0.33  |
| 18.19 | -0.40 | -0.61 | -0.72 | -0.31 | -0.50 | -0.39 | -0.54 | -0.57 | -0.10 | -0.29 | -0.16 |
| 18.6  | -0.22 | -0.49 | -0.13 | -0.29 | -0.13 | -0.09 | 0.42  | 0.67  | 0.67  | 0.65  | 0.93  |
| 19.05 | -0.03 | 0.07  | 0.04  | 0.17  | 0.18  | 0.48  | 0.58  | 0.87  | 0.92  | 1.11  | 1.25  |
| 19.53 | -0.63 | -0.88 | -0.76 | -0.83 | -0.54 | -0.43 | -0.12 | -0.21 | -0.06 | 0.42  | 0.28  |
| 20.05 | -0.99 | -0.94 | -0.75 | -1.04 | -0.65 | -0.44 | -0.56 | -0.36 | 0.02  | 0.12  | 0.35  |
| 20.61 | -1.07 | -0.66 | -0.85 | -0.57 | -0.75 | -0.47 | -0.45 | -0.31 | 0.02  | 0.05  | 0.42  |
| 21.22 | -0.66 | -0.47 | -1.04 | -0.59 | -0.41 | -0.17 | 0.03  | -0.18 | 0.08  | 0.16  | 0.49  |
| 21.87 | -0.59 | -0.47 | -0.69 | -0.62 | -0.35 | -0.16 | 0.09  | 0.20  | 0.39  | 0.84  | 0.87  |
| 22.57 | -0.54 | -0.36 | -0.34 | -0.26 | 0.27  | 0.41  | 0.45  | 0.42  | 0.48  | 0.64  | 0.85  |
| 23.33 | -0.83 | -0.97 | -0.83 | -0.93 | -0.59 | -0.52 | -0.71 | -0.26 | -0.15 | -0.27 | -0.07 |
| 24.15 | -0.92 | -0.71 | -0.85 | -1.07 | -0.88 | -0.59 | -0.37 | -0.31 | -0.16 | 0.04  | 0.08  |
| 25.03 | -0.78 | -1.28 | -0.96 | -0.99 | -0.91 | -0.65 | -0.58 | -0.72 | -0.53 | -0.17 | -0.55 |
| 25.98 | -0.48 | -0.42 | -0.26 | -0.07 | -0.10 | 0.17  | 0.19  | 0.41  | 0.45  | 0.69  | 0.86  |
| 27.01 | -0.27 | -0.14 | -0.36 | -0.01 | 0.44  | 0.33  | 0.67  | 0.71  | 0.84  | 0.79  | 1.08  |
| 28.11 | -0.75 | -0.87 | -0.71 | -0.70 | -0.48 | -0.20 | -0.16 | -0.21 | 0.08  | 0.04  | 0.53  |
| 29.3  | -0.43 | -0.77 | -0.59 | -0.72 | -0.34 | -0.28 | -0.19 | -0.35 | 0.20  | 0.35  | 0.57  |
| 30.59 | -0.37 | -0.66 | -0.83 | -0.73 | -0.73 | -0.29 | -0.18 | -0.25 | 0.12  | 0.07  | 0.23  |
| 31.98 | -0.86 | -1.12 | -0.83 | -0.88 | -0.61 | -0.53 | -0.27 | -0.16 | -0.05 | -0.23 | 0.27  |
| 33.47 | -0.44 | -0.35 | -0.28 | -0.34 | -0.14 | -0.17 | 0.08  | 0.36  | 0.46  | 0.31  | 0.48  |
| 35.09 | -0.17 | -0.50 | -0.46 | -0.52 | -0.45 | -0.21 | 0.34  | 0.19  | 0.38  | 0.42  | 0.74  |
| 36.83 | -0.43 | -0.77 | -0.50 | -0.91 | -0.44 | -0.61 | -0.27 | -0.38 | -0.03 | 0.15  | 0.27  |
| 38.71 | -0.45 | -0.75 | -0.60 | -0.43 | -0.44 | -0.07 | -0.09 | -0.05 | 0.22  | 0.27  | 0.40  |
| 40.73 | -0.98 | -0.78 | -1.19 | -0.85 | -0.63 | -0.65 | -0.51 | -0.37 | 0.00  | -0.25 | 0.00  |
| 42.92 | -0.62 | -0.75 | -0.83 | -0.23 | -0.51 | -0.42 | -0.06 | -0.07 | 0.10  | 0.03  | 0.31  |
| 45.27 | -0.19 | -0.68 | -0.29 | 0.13  | -0.30 | 0.33  | 0.34  | 0.47  | 0.60  | 0.79  | 1.26  |
| 47.81 | -0.01 | -0.39 | -0.08 | -0.21 | -0.34 | -0.30 | -0.05 | 0.68  | 0.53  | 0.66  | 0.76  |

|         |       |       |       |       |       |       |       |       |       |       |       |
|---------|-------|-------|-------|-------|-------|-------|-------|-------|-------|-------|-------|
| 50.55   | -0.57 | -0.92 | -0.80 | -0.57 | -0.32 | -0.56 | -0.17 | -0.37 | 0.28  | -0.10 | 0.61  |
| 53.51   | -0.52 | -0.08 | -0.34 | -0.57 | -0.30 | -0.40 | 0.14  | -0.06 | 0.31  | 0.35  | 0.54  |
| 56.69   | -0.80 | -0.95 | -0.85 | -0.86 | -0.81 | -0.46 | -0.33 | -0.29 | -0.11 | -0.01 | 0.08  |
| 60.13   | -0.23 | -0.18 | 0.07  | -0.10 | 0.30  | 0.20  | 0.58  | 0.45  | 0.54  | 0.86  | 0.93  |
| 63.84   | -0.76 | -0.42 | -0.26 | -0.56 | 0.01  | -0.18 | 0.42  | 0.44  | 0.63  | 0.50  | 0.79  |
| 67.83   | -0.29 | -0.52 | -0.18 | -0.31 | -0.06 | -0.11 | 0.12  | 0.14  | 0.15  | 0.59  | 0.54  |
| 72.15   | -0.65 | -1.00 | -1.22 | -0.67 | -0.56 | -0.41 | 0.10  | -0.20 | 0.03  | 0.03  | 0.68  |
| 76.8    | -0.74 | -0.86 | -0.69 | -0.98 | -0.61 | -0.76 | -0.75 | -0.37 | -0.23 | -0.31 | 0.14  |
| 81.81   | -0.64 | -0.63 | -0.83 | -0.55 | -0.38 | -0.05 | 0.12  | 0.04  | -0.11 | 0.41  | 0.37  |
| 87.22   | -0.59 | -0.54 | -0.84 | -0.71 | -0.22 | -0.10 | 0.36  | 0.20  | 0.58  | 0.34  | 1.03  |
| 93.06   | -0.24 | -0.37 | -0.34 | -0.30 | -0.21 | 0.06  | -0.01 | 0.22  | 0.58  | 0.76  | 0.50  |
| 99.35   | -0.92 | -1.04 | -0.93 | -0.99 | -0.92 | -0.56 | -0.50 | -0.35 | 0.00  | 0.13  | 0.22  |
| 106.13  | -0.76 | -0.63 | -0.94 | -0.50 | -0.35 | -0.45 | -0.34 | -0.42 | 0.19  | 0.25  | 0.35  |
| 113.45  | -0.88 | -0.92 | -0.95 | -1.08 | -0.89 | -0.75 | -0.24 | -0.09 | -0.31 | -0.44 | -0.10 |
| 121.34  | -0.79 | -0.58 | -0.42 | 0.01  | 0.12  | 0.32  | 0.44  | 0.53  | 0.37  | 0.94  | 0.67  |
| 129.86  | -0.39 | -0.53 | -0.18 | 0.03  | 0.01  | 0.32  | 0.56  | 0.20  | 0.75  | 0.64  | 0.98  |
| 139.04  | -0.97 | -0.78 | -0.77 | -0.87 | -0.57 | -0.34 | 0.00  | -0.38 | -0.20 | 0.01  | 0.63  |
| 148.94  | -0.60 | -0.95 | -0.60 | -1.04 | -0.79 | -0.79 | 0.03  | -0.37 | -0.19 | 0.19  | 0.28  |
| 159.62  | -0.88 | -0.97 | -1.01 | -0.84 | -0.88 | -0.51 | -0.58 | -0.19 | -0.18 | 0.22  | 0.25  |
| 171.14  | -0.72 | -0.82 | -1.10 | -1.08 | -0.80 | -0.57 | -0.27 | -0.20 | -0.20 | 0.15  | 0.48  |
| 183.56  | -0.22 | -0.61 | -0.35 | -0.53 | -0.01 | 0.14  | 0.37  | 0.83  | 1.03  | 0.98  | 1.59  |
| 196.96  | -0.79 | -0.76 | -0.23 | -0.47 | -0.42 | 0.07  | 0.21  | 0.33  | 0.47  | 0.36  | 0.73  |
| 211.41  | -0.90 | -0.85 | -0.82 | -0.86 | -0.76 | -0.76 | -0.13 | -0.32 | -0.07 | 0.03  | 0.40  |
| 226.99  | -1.05 | -0.89 | -0.98 | -0.82 | -0.79 | -0.68 | -0.59 | -0.26 | 0.01  | -0.16 | 0.34  |
| 243.8   | -1.16 | -0.98 | -1.02 | -0.94 | -0.76 | -0.48 | -0.37 | -0.52 | -0.34 | -0.27 | -0.01 |
| 261.93  | -0.38 | -0.42 | -0.19 | -0.06 | 0.16  | -0.03 | 0.27  | 0.33  | 0.82  | 0.83  | 1.07  |
| 281.48  | -0.41 | -0.51 | -0.69 | -0.38 | -0.24 | 0.10  | -0.03 | 0.33  | 0.18  | 0.63  | 1.18  |
| 302.56  | -0.33 | -0.91 | -0.54 | -0.19 | -0.16 | -0.07 | 0.22  | 0.22  | 0.31  | 0.85  | 1.10  |
| 325.3   | -0.81 | -1.07 | -0.66 | -0.62 | -0.53 | -0.32 | -0.15 | 0.11  | 0.37  | 0.24  | 0.76  |
| 349.83  | -0.96 | -0.93 | -1.00 | -1.18 | -0.54 | -0.77 | -0.46 | -0.55 | -0.07 | 0.00  | 0.90  |
| 376.28  | -0.99 | -0.96 | -0.83 | -1.09 | -0.83 | -0.74 | -0.38 | -0.35 | -0.17 | 0.32  | 0.42  |
| 404.81  | -0.49 | -0.83 | -0.58 | -0.58 | -0.27 | -0.07 | 0.34  | 0.51  | 0.51  | 0.92  | 1.32  |
| 435.58  | -0.61 | -0.59 | -0.58 | -0.55 | -0.28 | 0.08  | 0.55  | 0.51  | 0.65  | 1.19  | 1.44  |
| 468.76  | -0.91 | -1.33 | -1.06 | -1.08 | -0.69 | -0.57 | -0.41 | -0.26 | -0.11 | 0.02  | 0.32  |
| 504.55  | -1.09 | -0.88 | -0.96 | -1.01 | -0.82 | -0.52 | -0.31 | -0.21 | -0.05 | 0.26  | 0.75  |
| 543.15  | -1.16 | -1.05 | -0.90 | -0.73 | -0.76 | -0.36 | -0.26 | -0.33 | -0.12 | 0.01  | 0.19  |
| 584.78  | -1.17 | -0.95 | -0.87 | -0.98 | -0.72 | -0.50 | -0.15 | 0.09  | 0.74  | 0.57  | 1.06  |
| 629.68  | -0.71 | -0.76 | -0.60 | -0.50 | -0.04 | -0.29 | 0.39  | 0.71  | 0.57  | 0.76  | 1.13  |
| 678.1   | -1.40 | -1.31 | -0.87 | -1.18 | -0.60 | -0.65 | -0.37 | -0.30 | 0.04  | -0.10 | 0.91  |
| 730.33  | -0.90 | -0.96 | -1.30 | -1.20 | -0.89 | -0.80 | -0.40 | -0.47 | 0.05  | 0.09  | 0.28  |
| 786.65  | -0.92 | -1.13 | -1.06 | -0.89 | -0.45 | -0.28 | -0.04 | -0.10 | 0.47  | 0.51  | 0.71  |
| 847.4   | -1.70 | -1.21 | -1.38 | -1.18 | -0.99 | -0.96 | -0.96 | -0.60 | -0.46 | -0.22 | 0.25  |
| 912.92  | -0.69 | -0.82 | -0.50 | -0.41 | -0.06 | 0.00  | 0.35  | 0.48  | 0.82  | 0.70  | 1.00  |
| 983.58  | -1.08 | -0.92 | -0.64 | -0.40 | -0.46 | -0.03 | 0.26  | 0.35  | 0.77  | 1.11  | 1.27  |
| 1059.78 | -1.43 | -1.78 | -1.30 | -1.31 | -0.99 | -1.12 | -0.41 | -0.47 | 0.11  | 0.01  | 0.73  |
| 1141.98 | -1.37 | -1.31 | -1.09 | -0.98 | -0.90 | -0.46 | -0.08 | -0.22 | 0.14  | 0.45  | 0.81  |
| 1230.62 | -1.44 | -1.38 | -1.50 | -1.32 | -1.21 | -1.22 | -0.94 | -0.87 | -0.15 | -0.24 | 0.28  |
| 1326.23 | -1.61 | -1.59 | -1.25 | -1.16 | -1.05 | -0.94 | -0.47 | -0.11 | 0.11  | 0.16  | 0.78  |
| 1429.34 | -0.55 | -0.49 | -0.42 | -0.48 | -0.02 | -0.24 | 0.39  | 0.54  | 0.61  | 1.08  | 1.40  |
| 1540.54 | -1.00 | -1.26 | -1.05 | -0.64 | -0.75 | -0.26 | -0.23 | -0.16 | 0.40  | 0.51  | 0.87  |



|         |       |       |       |       |       |       |       |       |       |       |      |
|---------|-------|-------|-------|-------|-------|-------|-------|-------|-------|-------|------|
| 1660.48 | -1.31 | -1.43 | -0.86 | -1.34 | -0.89 | -1.18 | -0.73 | -0.53 | -0.79 | -0.11 | 0.35 |
| 1789.83 | -1.23 | -1.26 | -1.23 | -1.27 | -0.87 | -0.56 | -0.44 | -0.23 | 0.12  | 0.18  | 0.63 |
| 1929.34 | -1.28 | -1.39 | -1.68 | -1.58 | -1.08 | -1.04 | -0.72 | -0.66 | -0.58 | -0.47 | 0.23 |
| 2079.8  | -0.83 | -0.63 | -0.36 | -0.38 | -0.12 | -0.17 | 0.29  | 0.69  | 0.78  | 1.14  | 1.64 |
| 2242.08 | -0.90 | -0.71 | -0.84 | -0.78 | -0.57 | 0.15  | 0.42  | 0.56  | 0.58  | 0.81  | 0.99 |
| 2417.1  | -1.38 | -1.37 | -1.41 | -1.27 | -0.78 | -0.59 | -0.35 | -0.58 | -0.18 | 0.20  | 0.40 |
| 2605.85 | -1.30 | -1.67 | -1.42 | -1.45 | -1.09 | -0.76 | -0.29 | -0.33 | -0.01 | 0.33  | 0.73 |
| 2809.43 | -1.30 | -1.99 | -1.60 | -1.88 | -1.26 | -0.98 | -1.14 | -0.75 | -0.52 | 0.09  | 0.50 |
| 3028.99 | -1.11 | -1.47 | -0.73 | -1.10 | -0.63 | -0.59 | -0.07 | -0.05 | 0.14  | 0.53  | 0.87 |
| 3265.79 | -0.27 | -0.46 | -0.52 | -0.26 | 0.12  | 0.21  | 0.31  | 0.58  | 0.54  | 1.05  | 1.38 |
| 3521.18 | -1.33 | -1.04 | -0.74 | -1.15 | -0.78 | -0.29 | 0.02  | 0.10  | 0.45  | 0.52  | 0.83 |
| 3796.62 | -1.03 | -1.32 | -1.17 | -1.14 | -0.93 | -0.97 | -0.57 | -0.81 | -0.19 | 0.45  | 0.25 |

| Wavelength (nm) | 367.19 | 368.59 | 370.00 | 371.41 | 372.82 | 374.23 | 375.64 | 377.05 | 378.45 | 379.86 | 381.27 |
|-----------------|--------|--------|--------|--------|--------|--------|--------|--------|--------|--------|--------|
| Time (ps)       |        |        |        |        |        |        |        |        |        |        |        |
| -3.28           | -0.22  | -0.03  | -0.20  | -0.17  | -0.24  | -0.14  | -0.14  | -0.23  | -0.01  | -0.09  | -0.16  |
| -2.78           | 0.22   | -0.06  | -0.01  | -0.17  | 0.17   | -0.12  | 0.11   | 0.07   | 0.03   | 0.26   | 0.32   |
| -2.28           | -0.07  | -0.14  | 0.49   | 0.09   | -0.16  | 0.14   | 0.00   | -0.18  | -0.12  | 0.06   | 0.18   |
| -1.78           | -0.02  | 0.07   | -0.16  | 0.12   | -0.15  | 0.06   | -0.04  | -0.18  | -0.29  | -0.25  | -0.34  |
| -1.28           | 0.08   | 0.27   | -0.02  | -0.01  | 0.21   | 0.05   | 0.25   | 0.13   | 0.19   | 0.13   | -0.05  |
| -0.78           | -0.04  | 0.06   | -0.02  | -0.04  | -0.06  | 0.01   | -0.24  | 0.02   | 0.20   | 0.08   | -0.13  |
| -0.28           | 0.38   | 0.16   | 0.22   | 0.27   | 0.37   | 0.41   | 0.24   | 0.37   | 0.16   | 0.25   | 0.24   |
| 0.22            | -0.33  | -0.33  | -0.31  | -0.09  | -0.14  | -0.42  | -0.18  | 0.01   | -0.17  | -0.44  | -0.04  |
| 0.32            | -0.04  | 0.18   | -0.09  | 0.01   | -0.07  | 0.16   | 0.13   | -0.07  | -0.14  | 0.09   | -0.10  |
| 0.42            | -0.10  | -0.09  | 0.02   | 0.06   | 0.13   | -0.15  | 0.16   | 0.29   | 0.00   | 0.02   | -0.01  |
| 0.52            | 0.21   | 0.13   | 0.05   | 0.33   | 0.14   | 0.20   | 0.43   | 0.40   | 0.21   | 0.16   | 0.08   |
| 0.62            | -0.08  | -0.22  | 0.12   | -0.07  | 0.11   | 0.00   | -0.01  | 0.10   | 0.03   | -0.03  | 0.08   |
| 0.72            | 0.29   | 0.44   | 0.35   | 0.10   | -0.03  | 0.22   | -0.01  | 0.25   | 0.27   | 0.22   | 0.06   |
| 0.77            | -0.24  | -0.41  | -0.08  | -0.29  | -0.14  | -0.10  | 0.00   | 0.15   | -0.12  | 0.24   | -0.07  |
| 0.82            | -0.99  | -0.29  | -0.21  | -0.20  | 0.01   | 0.07   | -0.24  | -0.10  | -0.17  | -0.11  | -0.01  |
| 0.87            | 0.39   | 0.76   | 0.85   | 1.18   | 1.18   | 1.36   | 1.50   | 1.33   | 0.93   | 0.53   | 0.14   |
| 0.92            | 0.55   | 1.07   | 1.20   | 1.35   | 1.66   | 1.56   | 2.24   | 2.41   | 2.95   | 3.44   | 3.69   |
| 0.97            | 1.22   | 1.30   | 1.55   | 2.17   | 2.43   | 2.18   | 2.69   | 3.02   | 3.07   | 3.27   | 3.79   |
| 1.02            | 1.97   | 2.03   | 2.38   | 3.15   | 3.76   | 4.45   | 5.22   | 5.88   | 6.61   | 7.12   | 7.28   |
| 1.07            | 1.75   | 2.51   | 2.62   | 2.95   | 3.50   | 4.15   | 4.50   | 4.92   | 5.82   | 6.22   | 7.11   |
| 1.12            | 1.34   | 1.91   | 1.97   | 2.42   | 2.63   | 3.07   | 3.11   | 3.70   | 4.02   | 4.14   | 4.66   |
| 1.17            | 0.83   | 1.15   | 1.40   | 1.83   | 2.03   | 2.32   | 2.60   | 2.96   | 3.30   | 3.70   | 3.80   |
| 1.22            | -0.20  | 0.43   | 0.48   | 0.87   | 1.31   | 1.62   | 2.01   | 2.12   | 2.56   | 2.87   | 3.19   |
| 1.27            | 0.64   | 1.13   | 1.42   | 1.34   | 1.91   | 2.17   | 2.21   | 2.65   | 2.96   | 3.22   | 3.55   |
| 1.32            | 1.67   | 1.90   | 2.30   | 2.81   | 3.28   | 3.10   | 3.47   | 3.98   | 4.40   | 4.58   | 4.98   |
| 1.37            | 0.97   | 1.57   | 1.71   | 2.13   | 2.60   | 2.31   | 2.81   | 3.47   | 3.68   | 3.73   | 4.37   |
| 1.42            | 0.51   | 0.56   | 0.81   | 1.19   | 1.69   | 1.77   | 2.25   | 2.56   | 2.92   | 3.21   | 3.17   |
| 1.47            | 0.05   | 0.48   | 0.77   | 1.17   | 1.44   | 1.55   | 1.81   | 2.22   | 2.42   | 2.74   | 3.01   |
| 1.52            | -0.19  | 0.22   | 0.69   | 0.87   | 1.03   | 1.18   | 1.50   | 1.92   | 2.29   | 2.36   | 2.75   |
| 1.57            | 0.94   | 1.32   | 1.67   | 2.09   | 2.26   | 2.67   | 2.56   | 3.01   | 3.46   | 3.87   | 3.73   |
| 1.62            | 1.26   | 1.99   | 2.20   | 2.46   | 2.91   | 2.96   | 3.18   | 3.65   | 3.95   | 4.12   | 4.12   |
| 1.67            | 1.39   | 1.44   | 1.65   | 1.90   | 2.18   | 2.05   | 2.64   | 2.91   | 3.33   | 3.02   | 3.44   |
| 1.72            | 0.57   | 0.78   | 0.95   | 1.06   | 1.46   | 1.42   | 1.98   | 2.20   | 2.43   | 2.71   | 2.88   |

|      |       |      |      |      |      |      |      |      |      |      |      |
|------|-------|------|------|------|------|------|------|------|------|------|------|
| 1.77 | -0.15 | 0.29 | 0.50 | 0.89 | 1.21 | 1.51 | 1.78 | 2.16 | 2.30 | 2.74 | 3.01 |
| 1.82 | 0.57  | 0.73 | 1.12 | 1.48 | 1.80 | 1.75 | 2.26 | 2.65 | 2.79 | 2.86 | 3.23 |
| 1.87 | 1.35  | 1.75 | 1.93 | 2.39 | 2.74 | 2.47 | 3.24 | 3.37 | 3.52 | 3.80 | 4.39 |
| 1.92 | 1.05  | 1.88 | 1.91 | 2.13 | 2.32 | 2.62 | 2.83 | 3.17 | 3.34 | 3.88 | 4.09 |
| 1.97 | 0.83  | 0.78 | 1.28 | 1.57 | 1.75 | 2.08 | 2.21 | 2.57 | 2.86 | 2.90 | 3.51 |
| 2.02 | 0.49  | 0.81 | 1.22 | 1.48 | 1.66 | 1.77 | 2.18 | 2.51 | 2.67 | 2.73 | 2.85 |
| 2.07 | 0.16  | 0.40 | 0.52 | 0.82 | 1.14 | 1.23 | 1.50 | 2.02 | 2.26 | 2.51 | 2.79 |
| 2.12 | 1.49  | 1.77 | 1.82 | 2.29 | 2.33 | 2.64 | 2.90 | 3.24 | 3.29 | 3.63 | 3.53 |
| 2.17 | 1.32  | 1.80 | 2.21 | 2.07 | 2.89 | 2.87 | 3.21 | 3.30 | 3.64 | 3.87 | 4.24 |
| 2.22 | 1.26  | 1.70 | 1.83 | 2.11 | 2.25 | 2.71 | 2.92 | 3.23 | 3.33 | 3.31 | 3.64 |
| 2.27 | 0.59  | 0.87 | 1.00 | 1.40 | 1.82 | 2.00 | 2.47 | 2.54 | 2.90 | 3.28 | 3.75 |
| 2.32 | 0.06  | 0.56 | 0.98 | 0.98 | 1.24 | 1.71 | 1.85 | 2.29 | 2.70 | 2.83 | 2.78 |
| 2.37 | 0.42  | 0.66 | 0.74 | 1.24 | 1.55 | 1.78 | 2.16 | 2.68 | 2.42 | 2.90 | 2.96 |
| 2.42 | 1.23  | 1.41 | 1.64 | 2.07 | 2.46 | 2.61 | 3.04 | 3.22 | 3.36 | 3.72 | 3.82 |
| 2.47 | 1.13  | 1.68 | 2.09 | 2.13 | 2.58 | 2.90 | 3.13 | 3.31 | 3.46 | 3.54 | 3.85 |
| 2.52 | 0.74  | 0.99 | 1.10 | 1.20 | 1.54 | 1.39 | 1.72 | 2.39 | 2.57 | 2.51 | 3.04 |
| 2.57 | 0.26  | 0.91 | 1.34 | 1.41 | 1.75 | 1.63 | 1.87 | 2.16 | 2.50 | 2.74 | 2.96 |
| 2.62 | 0.06  | 0.24 | 0.34 | 0.77 | 1.04 | 1.36 | 1.30 | 1.84 | 2.13 | 2.43 | 2.58 |
| 2.67 | 0.69  | 0.97 | 1.43 | 1.64 | 2.19 | 2.05 | 2.09 | 2.60 | 2.97 | 3.06 | 3.49 |
| 2.72 | 1.46  | 1.67 | 1.98 | 2.43 | 2.59 | 2.53 | 2.98 | 3.45 | 3.52 | 4.16 | 3.85 |
| 2.77 | 1.60  | 1.80 | 2.13 | 2.26 | 2.64 | 2.81 | 2.92 | 3.18 | 3.72 | 3.80 | 3.95 |
| 2.82 | 0.20  | 0.67 | 0.68 | 1.16 | 1.40 | 1.61 | 1.83 | 2.53 | 2.70 | 2.88 | 3.16 |
| 2.87 | 0.66  | 0.88 | 0.87 | 1.32 | 1.76 | 1.74 | 1.84 | 2.51 | 2.69 | 2.80 | 3.16 |
| 2.92 | 0.16  | 0.38 | 0.77 | 1.11 | 1.20 | 1.55 | 1.88 | 2.11 | 2.45 | 2.69 | 3.10 |
| 2.97 | 1.11  | 1.76 | 1.84 | 2.31 | 2.48 | 2.64 | 3.03 | 3.01 | 3.42 | 3.50 | 3.68 |
| 3.02 | 2.07  | 2.09 | 2.38 | 2.56 | 2.76 | 2.94 | 3.52 | 3.77 | 3.71 | 4.03 | 4.56 |
| 3.07 | 0.94  | 1.11 | 1.37 | 1.24 | 1.55 | 1.71 | 2.00 | 2.37 | 2.61 | 3.05 | 2.90 |
| 3.12 | 0.51  | 0.97 | 1.36 | 1.26 | 1.90 | 2.05 | 2.40 | 2.69 | 2.97 | 3.29 | 3.24 |
| 3.17 | 0.19  | 0.13 | 0.59 | 1.35 | 1.27 | 1.25 | 1.82 | 2.20 | 2.52 | 2.77 | 2.86 |
| 3.22 | 0.89  | 1.15 | 1.38 | 1.55 | 2.08 | 1.79 | 2.50 | 2.83 | 3.14 | 3.33 | 3.56 |
| 3.27 | 1.26  | 1.67 | 2.46 | 2.54 | 2.70 | 2.97 | 3.23 | 3.24 | 3.76 | 3.96 | 4.14 |
| 3.32 | 0.96  | 1.20 | 1.67 | 1.90 | 2.17 | 2.37 | 3.00 | 3.12 | 3.18 | 3.71 | 3.58 |
| 3.37 | 0.50  | 0.95 | 1.17 | 1.36 | 1.63 | 1.77 | 2.14 | 2.61 | 2.85 | 3.02 | 3.14 |
| 3.42 | 0.61  | 0.87 | 1.32 | 1.33 | 1.52 | 1.83 | 2.27 | 2.12 | 2.50 | 2.88 | 3.19 |
| 3.47 | 0.09  | 0.35 | 0.59 | 0.79 | 1.13 | 1.27 | 1.74 | 1.93 | 2.17 | 2.35 | 2.76 |
| 3.52 | 1.31  | 1.43 | 1.82 | 2.26 | 2.66 | 2.58 | 2.92 | 3.13 | 3.06 | 3.54 | 3.84 |
| 3.57 | 1.74  | 2.16 | 2.31 | 2.56 | 2.91 | 3.03 | 3.33 | 3.58 | 3.72 | 3.73 | 4.13 |
| 3.62 | 1.11  | 1.15 | 1.40 | 2.02 | 1.92 | 2.20 | 2.41 | 2.97 | 2.77 | 3.14 | 3.44 |
| 3.67 | 0.38  | 0.96 | 1.12 | 1.54 | 1.91 | 2.18 | 2.54 | 2.67 | 2.77 | 2.86 | 3.34 |
| 3.72 | -0.03 | 0.25 | 0.57 | 0.65 | 0.86 | 1.36 | 1.82 | 2.10 | 2.46 | 2.45 | 2.89 |
| 3.92 | 0.58  | 1.18 | 1.23 | 1.49 | 1.44 | 1.91 | 2.17 | 2.37 | 2.84 | 2.53 | 2.99 |
| 4.12 | 1.13  | 1.42 | 2.14 | 2.34 | 2.71 | 2.54 | 2.98 | 3.36 | 3.40 | 3.86 | 4.09 |
| 4.32 | 1.11  | 1.90 | 2.03 | 2.36 | 2.60 | 2.68 | 3.07 | 3.62 | 3.58 | 3.92 | 4.11 |
| 4.52 | 0.46  | 0.81 | 1.20 | 1.37 | 1.52 | 1.76 | 2.12 | 2.20 | 2.66 | 2.87 | 3.06 |
| 4.72 | 0.52  | 1.05 | 1.17 | 1.32 | 1.43 | 1.81 | 2.16 | 2.55 | 2.46 | 2.59 | 3.02 |
| 4.92 | 0.41  | 0.32 | 0.99 | 1.29 | 1.23 | 1.43 | 1.77 | 2.18 | 2.47 | 2.62 | 2.62 |
| 5.12 | 1.01  | 1.02 | 1.33 | 1.67 | 2.12 | 2.13 | 2.55 | 2.94 | 3.12 | 3.34 | 3.73 |
| 5.32 | 1.42  | 1.93 | 2.13 | 2.41 | 2.44 | 2.71 | 3.26 | 3.32 | 3.67 | 4.00 | 4.30 |
| 5.52 | 1.09  | 1.23 | 1.59 | 2.06 | 2.22 | 2.19 | 2.69 | 2.86 | 3.17 | 3.64 | 3.55 |
| 5.72 | 0.51  | 0.99 | 1.30 | 1.63 | 1.55 | 2.02 | 2.10 | 2.52 | 2.80 | 3.02 | 3.32 |

|       |       |      |      |      |      |      |      |      |      |      |      |
|-------|-------|------|------|------|------|------|------|------|------|------|------|
| 5.92  | 0.39  | 0.92 | 1.07 | 1.22 | 1.68 | 1.71 | 2.05 | 2.31 | 2.58 | 2.74 | 2.93 |
| 6.12  | 0.46  | 0.96 | 0.83 | 1.18 | 1.16 | 1.67 | 1.83 | 2.12 | 2.14 | 2.54 | 2.77 |
| 6.32  | 1.22  | 1.51 | 1.75 | 2.14 | 2.66 | 2.75 | 2.86 | 3.24 | 3.65 | 3.93 | 3.84 |
| 6.52  | 1.33  | 1.75 | 1.52 | 2.09 | 2.71 | 2.65 | 2.74 | 3.49 | 3.51 | 3.60 | 3.62 |
| 6.72  | 0.67  | 1.19 | 1.16 | 1.42 | 1.68 | 1.95 | 1.98 | 2.37 | 2.48 | 2.62 | 3.06 |
| 6.92  | 0.59  | 0.73 | 1.02 | 1.34 | 1.99 | 1.86 | 2.36 | 2.60 | 2.61 | 3.04 | 3.09 |
| 7.12  | -0.07 | 0.28 | 0.28 | 0.87 | 1.16 | 1.05 | 1.72 | 2.13 | 2.22 | 2.36 | 2.66 |
| 7.32  | 1.01  | 1.46 | 1.23 | 1.77 | 2.14 | 2.18 | 2.45 | 2.57 | 2.92 | 3.20 | 3.14 |
| 7.52  | 1.16  | 1.28 | 1.56 | 2.24 | 2.43 | 2.48 | 2.92 | 3.18 | 3.50 | 3.70 | 3.92 |
| 7.72  | 1.19  | 1.63 | 1.82 | 2.21 | 2.45 | 2.58 | 2.63 | 3.07 | 3.16 | 3.62 | 3.75 |
| 7.92  | 0.38  | 0.48 | 1.12 | 1.07 | 1.68 | 1.42 | 2.15 | 2.31 | 2.55 | 2.98 | 3.03 |
| 8.12  | 0.23  | 0.66 | 0.81 | 0.96 | 1.41 | 1.40 | 1.75 | 1.93 | 2.19 | 2.73 | 2.61 |
| 8.32  | 0.06  | 0.18 | 0.61 | 0.79 | 1.18 | 1.35 | 1.67 | 1.76 | 2.14 | 2.37 | 2.52 |
| 8.52  | 1.51  | 1.42 | 1.82 | 2.41 | 2.49 | 2.77 | 2.96 | 3.47 | 3.34 | 3.72 | 3.87 |
| 8.72  | 1.16  | 1.28 | 1.84 | 1.88 | 2.20 | 2.48 | 3.05 | 2.93 | 3.09 | 3.20 | 3.36 |
| 8.92  | 0.71  | 1.40 | 1.31 | 1.51 | 1.62 | 2.37 | 2.20 | 2.65 | 2.51 | 3.00 | 3.02 |
| 9.12  | 0.56  | 1.06 | 0.93 | 1.28 | 1.81 | 2.07 | 2.32 | 2.95 | 3.07 | 2.97 | 3.46 |
| 9.32  | -0.02 | 0.41 | 0.74 | 0.82 | 1.39 | 1.27 | 1.66 | 2.03 | 2.23 | 2.56 | 2.65 |
| 9.52  | 0.63  | 0.98 | 1.05 | 1.38 | 1.48 | 2.05 | 1.93 | 2.36 | 2.78 | 2.84 | 2.90 |
| 9.72  | 1.20  | 1.51 | 1.93 | 2.17 | 2.24 | 2.54 | 2.95 | 3.49 | 3.47 | 3.79 | 3.90 |
| 9.92  | 1.17  | 1.65 | 1.96 | 2.15 | 2.32 | 2.64 | 2.61 | 2.95 | 3.34 | 3.48 | 3.68 |
| 10.12 | 0.51  | 0.91 | 1.24 | 1.56 | 1.57 | 2.01 | 2.47 | 2.48 | 2.70 | 2.79 | 3.02 |
| 10.32 | 0.67  | 1.18 | 1.27 | 1.47 | 1.92 | 2.03 | 2.43 | 2.59 | 2.91 | 2.95 | 3.19 |
| 10.52 | -0.34 | 0.52 | 0.63 | 0.68 | 1.27 | 1.33 | 1.77 | 2.19 | 2.34 | 2.58 | 2.65 |
| 10.72 | 1.29  | 1.50 | 1.67 | 1.92 | 2.20 | 2.53 | 2.62 | 2.95 | 3.02 | 3.22 | 3.61 |
| 10.92 | 1.42  | 1.70 | 1.96 | 1.91 | 2.44 | 2.74 | 3.24 | 3.23 | 3.36 | 3.71 | 3.73 |
| 11.12 | 1.14  | 1.20 | 1.74 | 1.95 | 1.95 | 2.14 | 2.35 | 2.76 | 3.20 | 3.19 | 3.67 |
| 11.32 | 0.76  | 1.03 | 1.23 | 1.29 | 1.80 | 2.10 | 2.49 | 2.73 | 2.81 | 3.27 | 3.33 |
| 11.52 | 0.31  | 0.59 | 0.83 | 1.30 | 1.46 | 1.59 | 1.80 | 2.22 | 2.59 | 2.79 | 2.82 |
| 11.72 | 0.56  | 0.77 | 0.64 | 1.11 | 1.37 | 1.61 | 1.73 | 2.20 | 2.36 | 2.55 | 2.90 |
| 11.92 | 1.11  | 1.52 | 1.55 | 1.83 | 2.15 | 2.55 | 2.80 | 3.12 | 3.49 | 3.68 | 3.97 |
| 12.12 | 0.60  | 1.30 | 1.07 | 1.47 | 2.03 | 2.18 | 2.19 | 2.54 | 2.47 | 2.74 | 3.06 |
| 12.32 | 0.81  | 0.99 | 1.06 | 1.46 | 1.57 | 1.61 | 1.99 | 2.15 | 2.68 | 2.79 | 3.03 |
| 12.52 | 0.44  | 0.65 | 0.97 | 1.22 | 1.67 | 1.77 | 2.02 | 2.30 | 2.75 | 2.84 | 2.94 |
| 12.72 | 0.09  | 0.18 | 0.88 | 0.82 | 1.21 | 1.53 | 1.85 | 1.79 | 2.21 | 2.25 | 2.55 |
| 12.92 | 1.29  | 1.20 | 1.12 | 1.81 | 2.07 | 2.25 | 2.46 | 2.99 | 2.97 | 3.13 | 3.53 |
| 13.12 | 1.18  | 1.80 | 1.79 | 2.23 | 2.72 | 2.75 | 2.74 | 3.24 | 3.42 | 3.61 | 3.80 |
| 13.32 | 1.10  | 1.37 | 1.99 | 1.87 | 2.41 | 2.60 | 2.66 | 3.13 | 3.31 | 3.55 | 3.21 |
| 13.52 | 0.38  | 0.73 | 1.21 | 1.55 | 1.61 | 2.10 | 2.01 | 2.43 | 2.57 | 2.78 | 3.12 |
| 13.72 | 0.41  | 0.74 | 1.18 | 1.43 | 1.73 | 1.54 | 2.18 | 2.50 | 2.48 | 2.41 | 2.73 |
| 13.92 | 0.28  | 0.41 | 0.78 | 1.03 | 1.38 | 1.85 | 1.85 | 2.18 | 2.62 | 2.72 | 2.74 |
| 14    | 1.06  | 1.48 | 1.71 | 1.85 | 2.60 | 2.41 | 3.15 | 3.31 | 3.49 | 3.30 | 3.98 |
| 14.08 | 1.33  | 1.62 | 1.89 | 1.98 | 2.49 | 2.13 | 2.95 | 3.23 | 3.40 | 3.60 | 3.51 |
| 14.17 | 0.36  | 0.87 | 1.04 | 1.32 | 1.66 | 1.63 | 2.04 | 2.43 | 2.51 | 2.62 | 3.16 |
| 14.27 | 0.54  | 1.01 | 1.24 | 1.61 | 2.12 | 2.34 | 2.18 | 2.98 | 3.25 | 3.38 | 3.68 |
| 14.38 | -0.08 | 0.42 | 0.56 | 0.69 | 1.19 | 1.42 | 1.76 | 2.00 | 2.07 | 2.37 | 2.82 |
| 14.49 | 0.84  | 1.00 | 1.39 | 1.32 | 1.67 | 1.85 | 2.41 | 2.44 | 2.55 | 2.77 | 3.11 |
| 14.61 | 1.68  | 1.71 | 2.01 | 2.29 | 2.40 | 2.69 | 3.20 | 3.47 | 3.54 | 3.86 | 3.88 |
| 14.75 | 1.19  | 1.41 | 1.73 | 1.68 | 2.21 | 2.08 | 2.06 | 2.66 | 2.94 | 3.21 | 3.48 |
| 14.89 | 0.75  | 0.93 | 1.12 | 1.66 | 1.79 | 1.79 | 2.17 | 2.52 | 2.83 | 2.85 | 3.15 |

|       |       |      |      |      |      |      |      |      |      |      |      |
|-------|-------|------|------|------|------|------|------|------|------|------|------|
| 15.05 | 0.65  | 0.89 | 1.30 | 1.35 | 1.90 | 1.79 | 2.13 | 2.43 | 2.59 | 2.66 | 2.76 |
| 15.21 | 0.01  | 0.39 | 0.66 | 1.08 | 1.15 | 1.42 | 1.75 | 2.10 | 2.23 | 2.27 | 2.60 |
| 15.39 | 1.32  | 1.73 | 1.91 | 2.00 | 1.99 | 2.46 | 2.69 | 2.99 | 3.17 | 3.46 | 3.78 |
| 15.59 | 1.11  | 1.47 | 1.81 | 2.27 | 2.53 | 2.54 | 2.65 | 3.09 | 3.21 | 3.49 | 3.63 |
| 15.8  | 0.49  | 0.95 | 1.49 | 1.60 | 1.80 | 2.11 | 2.25 | 2.54 | 2.87 | 3.25 | 3.30 |
| 16.02 | 0.65  | 0.91 | 1.19 | 1.85 | 1.90 | 2.15 | 2.47 | 2.91 | 2.98 | 3.26 | 3.27 |
| 16.27 | 0.19  | 0.44 | 0.47 | 0.95 | 1.08 | 1.39 | 1.54 | 1.88 | 2.12 | 2.49 | 2.62 |
| 16.53 | 0.34  | 0.87 | 1.06 | 1.25 | 1.41 | 1.42 | 1.99 | 2.29 | 2.38 | 2.83 | 2.87 |
| 16.81 | 1.21  | 1.60 | 2.03 | 2.18 | 2.44 | 2.62 | 2.83 | 3.01 | 3.40 | 3.56 | 3.74 |
| 17.12 | 1.16  | 1.41 | 2.01 | 2.02 | 2.37 | 2.34 | 2.40 | 2.86 | 3.30 | 3.08 | 3.24 |
| 17.45 | 0.87  | 0.92 | 1.32 | 1.75 | 1.76 | 2.01 | 2.35 | 2.52 | 2.75 | 3.27 | 3.16 |
| 17.81 | 0.56  | 0.89 | 1.54 | 1.39 | 1.58 | 1.86 | 2.22 | 2.20 | 2.61 | 2.70 | 3.11 |
| 18.19 | 0.03  | 0.60 | 0.85 | 1.21 | 1.16 | 1.19 | 1.51 | 1.60 | 2.00 | 2.18 | 2.62 |
| 18.6  | 1.22  | 1.46 | 1.96 | 2.08 | 2.36 | 2.46 | 2.82 | 3.06 | 3.32 | 3.34 | 3.55 |
| 19.05 | 1.57  | 2.10 | 2.00 | 2.26 | 2.37 | 2.39 | 2.55 | 3.10 | 3.26 | 3.50 | 3.70 |
| 19.53 | 0.57  | 0.96 | 1.22 | 1.24 | 1.62 | 2.20 | 2.11 | 2.51 | 2.68 | 2.74 | 3.11 |
| 20.05 | 0.43  | 0.85 | 1.21 | 1.34 | 1.93 | 2.15 | 2.28 | 2.49 | 2.77 | 2.81 | 3.30 |
| 20.61 | 0.26  | 0.78 | 0.83 | 1.18 | 1.67 | 1.96 | 1.98 | 2.39 | 2.74 | 2.61 | 2.80 |
| 21.22 | 0.56  | 0.60 | 1.06 | 1.22 | 1.56 | 1.74 | 1.97 | 2.30 | 2.20 | 3.07 | 2.84 |
| 21.87 | 1.17  | 1.60 | 1.92 | 2.48 | 2.35 | 2.63 | 3.14 | 3.13 | 3.49 | 3.89 | 3.70 |
| 22.57 | 1.23  | 1.70 | 1.60 | 1.75 | 1.95 | 2.38 | 2.50 | 2.86 | 3.02 | 3.14 | 3.26 |
| 23.33 | 0.36  | 0.74 | 1.29 | 1.25 | 1.38 | 1.77 | 2.24 | 2.32 | 2.69 | 2.98 | 2.99 |
| 24.15 | 0.19  | 0.93 | 0.93 | 1.46 | 1.71 | 1.98 | 2.14 | 2.52 | 2.85 | 2.85 | 3.15 |
| 25.03 | -0.15 | 0.35 | 0.38 | 0.75 | 0.86 | 1.28 | 1.43 | 1.70 | 1.89 | 2.23 | 2.36 |
| 25.98 | 1.10  | 1.66 | 1.73 | 2.14 | 2.56 | 2.51 | 2.76 | 2.87 | 3.22 | 3.49 | 3.66 |
| 27.01 | 1.43  | 1.44 | 2.17 | 2.08 | 2.38 | 2.76 | 2.76 | 3.04 | 3.02 | 3.56 | 3.95 |
| 28.11 | 1.13  | 1.19 | 1.41 | 1.66 | 2.01 | 1.75 | 2.14 | 2.46 | 2.69 | 2.77 | 3.20 |
| 29.3  | 0.90  | 1.29 | 1.58 | 1.76 | 1.67 | 2.32 | 2.28 | 2.61 | 2.90 | 2.95 | 3.25 |
| 30.59 | 0.52  | 0.97 | 0.94 | 1.36 | 1.43 | 1.77 | 1.94 | 2.22 | 2.48 | 2.48 | 2.79 |
| 31.98 | 0.39  | 0.46 | 0.88 | 1.45 | 1.42 | 1.85 | 1.76 | 2.42 | 2.43 | 2.64 | 2.71 |
| 33.47 | 0.74  | 1.20 | 1.63 | 2.32 | 2.25 | 2.49 | 2.51 | 3.07 | 3.26 | 3.21 | 3.59 |
| 35.09 | 0.95  | 1.37 | 1.56 | 1.67 | 1.86 | 2.00 | 2.49 | 2.72 | 2.95 | 3.19 | 3.34 |
| 36.83 | 0.48  | 1.08 | 1.06 | 1.47 | 1.53 | 1.90 | 2.16 | 2.35 | 2.52 | 3.00 | 2.97 |
| 38.71 | 0.92  | 1.21 | 1.17 | 1.75 | 1.95 | 1.95 | 2.45 | 2.84 | 3.19 | 3.05 | 3.13 |
| 40.73 | 0.19  | 0.33 | 0.63 | 1.18 | 1.15 | 1.56 | 1.77 | 2.00 | 2.40 | 2.41 | 2.56 |
| 42.92 | 0.84  | 0.61 | 1.32 | 1.33 | 1.71 | 2.22 | 2.23 | 2.36 | 2.75 | 2.82 | 3.12 |
| 45.27 | 1.05  | 1.45 | 1.78 | 2.18 | 2.44 | 2.73 | 3.09 | 3.19 | 3.47 | 3.59 | 3.91 |
| 47.81 | 1.15  | 1.55 | 1.84 | 2.03 | 2.45 | 2.31 | 2.65 | 2.86 | 3.17 | 3.03 | 3.53 |
| 50.55 | 0.74  | 0.81 | 1.12 | 1.43 | 1.93 | 1.85 | 2.21 | 2.45 | 2.66 | 2.99 | 3.25 |
| 53.51 | 0.51  | 1.12 | 1.31 | 1.31 | 1.93 | 1.80 | 2.08 | 2.25 | 2.41 | 2.77 | 3.08 |
| 56.69 | 0.54  | 0.62 | 0.64 | 0.87 | 1.25 | 1.36 | 1.78 | 1.87 | 2.22 | 2.28 | 2.54 |
| 60.13 | 1.36  | 1.56 | 1.71 | 2.10 | 2.27 | 2.52 | 2.99 | 3.34 | 3.25 | 3.50 | 3.67 |
| 63.84 | 1.07  | 1.26 | 1.51 | 1.95 | 2.20 | 2.24 | 2.27 | 2.74 | 2.91 | 3.24 | 3.16 |
| 67.83 | 1.03  | 1.18 | 1.29 | 1.84 | 1.93 | 1.93 | 2.35 | 2.44 | 2.92 | 3.17 | 3.21 |
| 72.15 | 0.91  | 0.76 | 1.16 | 1.58 | 1.80 | 2.15 | 2.51 | 2.58 | 2.83 | 2.91 | 3.20 |
| 76.8  | 0.10  | 0.55 | 0.81 | 1.22 | 1.47 | 1.42 | 1.65 | 1.96 | 2.23 | 2.30 | 2.65 |
| 81.81 | 0.67  | 1.12 | 1.15 | 1.63 | 1.62 | 1.84 | 2.17 | 2.50 | 2.70 | 2.58 | 3.14 |
| 87.22 | 1.41  | 1.72 | 1.88 | 2.32 | 2.27 | 2.68 | 2.88 | 3.12 | 3.37 | 3.48 | 3.65 |
| 93.06 | 0.96  | 1.69 | 1.40 | 1.80 | 2.31 | 2.34 | 2.28 | 2.79 | 2.76 | 2.91 | 2.95 |
| 99.35 | 0.54  | 0.84 | 1.05 | 1.46 | 1.66 | 1.88 | 2.00 | 2.55 | 2.72 | 2.92 | 2.92 |

|         |      |      |      |      |      |      |      |      |      |      |      |
|---------|------|------|------|------|------|------|------|------|------|------|------|
| 106.13  | 0.58 | 1.24 | 1.15 | 1.25 | 1.87 | 1.86 | 2.29 | 2.60 | 2.96 | 3.13 | 3.08 |
| 113.45  | 0.42 | 0.76 | 1.07 | 1.21 | 1.56 | 1.58 | 1.95 | 2.28 | 2.43 | 2.47 | 3.01 |
| 121.34  | 1.24 | 1.54 | 2.23 | 2.26 | 2.52 | 2.75 | 2.83 | 3.49 | 3.60 | 3.60 | 4.09 |
| 129.86  | 1.21 | 1.57 | 1.98 | 2.11 | 2.28 | 2.63 | 2.80 | 3.17 | 3.34 | 3.44 | 3.64 |
| 139.04  | 0.73 | 1.04 | 1.09 | 1.21 | 1.35 | 1.84 | 2.04 | 2.24 | 2.50 | 2.62 | 2.66 |
| 148.94  | 0.71 | 0.99 | 1.20 | 1.56 | 1.74 | 2.08 | 2.52 | 2.74 | 2.75 | 3.25 | 3.29 |
| 159.62  | 0.58 | 0.80 | 1.22 | 1.73 | 1.97 | 1.73 | 2.25 | 2.20 | 2.50 | 2.60 | 2.96 |
| 171.14  | 0.46 | 0.80 | 0.98 | 1.41 | 1.73 | 1.81 | 2.23 | 2.48 | 2.60 | 2.79 | 2.94 |
| 183.56  | 1.23 | 1.85 | 2.29 | 2.31 | 2.95 | 2.83 | 3.12 | 3.38 | 3.49 | 3.58 | 3.98 |
| 196.96  | 0.87 | 1.29 | 1.83 | 1.82 | 2.09 | 2.17 | 2.73 | 3.04 | 3.06 | 3.17 | 3.43 |
| 211.41  | 0.49 | 0.91 | 1.48 | 1.49 | 1.65 | 1.84 | 2.29 | 2.54 | 2.95 | 3.06 | 3.29 |
| 226.99  | 0.58 | 0.89 | 1.34 | 1.52 | 1.86 | 2.33 | 2.51 | 2.78 | 2.99 | 3.08 | 3.42 |
| 243.8   | 0.53 | 0.71 | 1.25 | 1.42 | 1.53 | 1.66 | 2.19 | 2.26 | 2.59 | 2.84 | 2.89 |
| 261.93  | 1.43 | 1.64 | 2.18 | 2.15 | 2.38 | 2.52 | 2.85 | 3.18 | 3.10 | 3.29 | 3.59 |
| 281.48  | 1.47 | 1.90 | 2.02 | 2.30 | 2.52 | 2.72 | 3.26 | 3.22 | 3.60 | 3.69 | 3.71 |
| 302.56  | 1.28 | 1.39 | 1.89 | 1.65 | 1.98 | 2.44 | 2.32 | 2.60 | 2.80 | 2.77 | 2.98 |
| 325.3   | 0.76 | 1.47 | 1.74 | 1.75 | 2.13 | 2.32 | 2.59 | 2.78 | 3.02 | 3.06 | 3.18 |
| 349.83  | 0.74 | 1.11 | 1.64 | 1.76 | 2.11 | 2.38 | 2.79 | 2.65 | 2.73 | 3.06 | 3.10 |
| 376.28  | 0.88 | 0.78 | 1.32 | 1.57 | 1.82 | 1.79 | 2.05 | 2.44 | 2.49 | 2.62 | 2.87 |
| 404.81  | 1.75 | 2.01 | 2.11 | 2.45 | 3.02 | 3.05 | 3.48 | 3.62 | 3.78 | 3.81 | 3.77 |
| 435.58  | 1.57 | 1.96 | 2.19 | 2.30 | 2.52 | 2.70 | 3.21 | 3.54 | 3.63 | 3.34 | 3.69 |
| 468.76  | 0.91 | 0.95 | 1.26 | 1.42 | 2.00 | 2.09 | 2.20 | 2.63 | 2.94 | 2.96 | 3.20 |
| 504.55  | 0.78 | 1.35 | 1.79 | 1.86 | 2.23 | 2.49 | 2.73 | 3.10 | 2.94 | 3.00 | 3.27 |
| 543.15  | 0.79 | 1.09 | 1.44 | 1.74 | 1.87 | 2.12 | 2.20 | 2.43 | 2.71 | 2.71 | 2.89 |
| 584.78  | 1.14 | 1.63 | 1.74 | 1.75 | 2.35 | 2.77 | 2.87 | 2.94 | 3.21 | 3.02 | 3.24 |
| 629.68  | 1.46 | 1.78 | 2.07 | 2.48 | 2.83 | 2.87 | 3.23 | 3.15 | 3.49 | 3.54 | 3.74 |
| 678.1   | 0.93 | 1.25 | 1.33 | 1.77 | 2.12 | 2.22 | 2.43 | 2.82 | 2.89 | 2.96 | 3.04 |
| 730.33  | 0.71 | 1.19 | 1.33 | 1.52 | 1.92 | 2.11 | 2.44 | 2.59 | 2.86 | 2.95 | 3.18 |
| 786.65  | 1.12 | 1.61 | 1.95 | 2.03 | 2.27 | 2.56 | 2.84 | 3.24 | 3.30 | 3.57 | 3.62 |
| 847.4   | 0.43 | 0.83 | 0.78 | 1.46 | 1.77 | 1.87 | 2.06 | 2.24 | 2.46 | 2.44 | 2.76 |
| 912.92  | 1.84 | 1.84 | 2.27 | 2.59 | 2.84 | 3.02 | 3.14 | 3.64 | 3.77 | 3.98 | 4.07 |
| 983.58  | 1.59 | 1.76 | 2.15 | 2.45 | 3.08 | 3.12 | 3.18 | 3.27 | 3.60 | 3.53 | 3.72 |
| 1059.78 | 0.86 | 1.68 | 1.81 | 2.27 | 2.32 | 2.49 | 2.64 | 3.15 | 2.95 | 2.92 | 3.32 |
| 1141.98 | 1.20 | 1.62 | 1.86 | 2.35 | 2.79 | 2.78 | 3.08 | 3.03 | 3.32 | 3.36 | 3.55 |
| 1230.62 | 0.23 | 0.74 | 1.07 | 1.39 | 1.83 | 2.20 | 2.02 | 2.27 | 2.54 | 2.65 | 2.96 |
| 1326.23 | 0.87 | 1.45 | 1.46 | 1.80 | 1.75 | 2.05 | 2.32 | 2.85 | 2.88 | 3.01 | 3.35 |
| 1429.34 | 1.86 | 2.18 | 2.57 | 2.76 | 2.92 | 3.29 | 3.56 | 3.65 | 3.86 | 3.90 | 3.98 |
| 1540.54 | 1.31 | 1.59 | 1.89 | 2.18 | 2.38 | 2.66 | 2.91 | 3.17 | 3.24 | 3.05 | 3.27 |
| 1660.48 | 0.24 | 0.99 | 1.25 | 2.03 | 1.99 | 2.32 | 2.45 | 2.60 | 2.81 | 3.04 | 3.06 |
| 1789.83 | 0.90 | 1.31 | 1.64 | 1.91 | 2.18 | 2.57 | 2.91 | 3.02 | 3.21 | 3.30 | 3.50 |
| 1929.34 | 0.71 | 0.81 | 1.20 | 1.55 | 1.64 | 2.05 | 2.21 | 2.35 | 2.74 | 2.70 | 2.66 |
| 2079.8  | 1.85 | 2.32 | 2.69 | 2.83 | 3.43 | 3.23 | 3.55 | 3.96 | 4.10 | 4.05 | 4.35 |
| 2242.08 | 1.60 | 1.89 | 2.18 | 2.66 | 2.74 | 2.93 | 3.34 | 3.42 | 3.49 | 3.61 | 3.89 |
| 2417.1  | 0.55 | 1.31 | 1.41 | 1.66 | 2.04 | 1.98 | 2.21 | 2.80 | 2.60 | 2.70 | 2.76 |
| 2605.85 | 0.97 | 1.36 | 1.80 | 2.18 | 2.37 | 2.42 | 2.60 | 3.05 | 3.32 | 3.35 | 3.48 |
| 2809.43 | 0.62 | 1.23 | 1.01 | 1.55 | 1.80 | 1.88 | 2.30 | 2.59 | 2.52 | 2.79 | 2.72 |
| 3028.99 | 1.23 | 1.80 | 1.90 | 1.85 | 2.49 | 2.47 | 2.58 | 2.99 | 3.22 | 3.35 | 3.66 |
| 3265.79 | 1.85 | 2.07 | 2.33 | 2.67 | 3.05 | 2.96 | 3.24 | 3.49 | 3.54 | 3.79 | 3.73 |
| 3521.18 | 1.39 | 1.66 | 2.26 | 2.03 | 2.29 | 2.29 | 2.53 | 2.78 | 2.78 | 3.01 | 3.05 |
| 3796.62 | 0.73 | 1.08 | 1.62 | 1.81 | 1.96 | 2.28 | 2.46 | 2.77 | 2.88 | 2.78 | 2.96 |

| Wavelength<br>(nm)<br>Time<br>(ps) | 382.68 | 384.09 | 385.50 | 386.91 | 388.31 | 389.72 | 391.13 | 392.54 | 393.95 | 395.36 | 396.77 |
|------------------------------------|--------|--------|--------|--------|--------|--------|--------|--------|--------|--------|--------|
| -3.28                              | -0.10  | -0.18  | -0.33  | 0.08   | -0.09  | 0.05   | -0.04  | 0.10   | -0.01  | 0.12   | -0.12  |
| -2.78                              | 0.01   | -0.04  | 0.24   | -0.04  | 0.07   | 0.09   | 0.09   | -0.12  | 0.12   | 0.22   | 0.08   |
| -2.28                              | -0.15  | -0.03  | -0.03  | -0.27  | -0.02  | 0.05   | 0.03   | 0.07   | -0.13  | -0.09  | -0.05  |
| -1.78                              | -0.05  | -0.12  | 0.03   | -0.25  | 0.05   | -0.22  | 0.07   | -0.13  | -0.01  | 0.18   | -0.03  |
| -1.28                              | 0.16   | 0.07   | 0.07   | -0.08  | -0.12  | -0.06  | -0.12  | 0.11   | -0.16  | -0.11  | -0.05  |
| -0.78                              | 0.16   | 0.18   | -0.07  | 0.22   | 0.10   | 0.01   | -0.01  | 0.14   | 0.18   | 0.03   | 0.12   |
| -0.28                              | 0.26   | 0.12   | 0.19   | 0.25   | 0.13   | 0.34   | 0.10   | 0.03   | 0.05   | -0.17  | 0.15   |
| 0.22                               | -0.29  | 0.00   | -0.09  | 0.09   | -0.12  | -0.28  | -0.13  | -0.20  | -0.04  | -0.18  | -0.09  |
| 0.32                               | 0.01   | -0.01  | -0.26  | -0.53  | -0.09  | 0.03   | -0.36  | -0.30  | -0.59  | -0.18  | -0.04  |
| 0.42                               | 0.12   | 0.15   | 0.04   | -0.24  | -0.05  | 0.00   | -0.40  | -0.40  | -0.26  | -0.34  | -0.28  |
| 0.52                               | 0.10   | 0.19   | 0.25   | -0.02  | 0.08   | -0.06  | 0.08   | 0.25   | -0.18  | 0.11   | 0.05   |
| 0.62                               | 0.01   | 0.08   | 0.10   | 0.13   | 0.38   | 0.12   | 0.24   | 0.24   | 0.11   | 0.07   | 0.28   |
| 0.72                               | 0.15   | 0.00   | 0.18   | -0.33  | 0.02   | -0.39  | -0.08  | -0.18  | 0.02   | -0.15  | 0.03   |
| 0.77                               | 0.11   | 0.11   | -0.29  | -0.21  | 0.16   | 0.04   | 0.13   | 0.22   | -0.09  | 0.30   | -0.26  |
| 0.82                               | 0.19   | -0.09  | -0.16  | -0.49  | 0.08   | 0.00   | 0.09   | 0.15   | -0.06  | -0.03  | -0.11  |
| 0.87                               | 0.04   | -0.06  | -0.09  | 0.04   | 0.04   | 0.19   | 0.00   | -0.21  | 0.05   | 0.26   | -0.01  |
| 0.92                               | 3.92   | 3.48   | 3.21   | 2.20   | 1.73   | 0.83   | 0.39   | 0.02   | -0.15  | -0.23  | -0.25  |
| 0.97                               | 3.88   | 3.89   | 4.52   | 4.16   | 4.27   | 3.99   | 3.43   | 2.80   | 2.30   | 2.12   | 1.19   |
| 1.02                               | 7.39   | 7.18   | 6.48   | 5.93   | 5.44   | 4.73   | 4.34   | 3.95   | 3.68   | 3.85   | 3.61   |
| 1.07                               | 7.74   | 8.73   | 9.15   | 9.32   | 10.01  | 9.65   | 9.55   | 9.51   | 8.56   | 8.25   | 7.36   |
| 1.12                               | 5.07   | 5.43   | 6.24   | 6.66   | 7.23   | 7.45   | 8.31   | 8.56   | 8.75   | 9.21   | 9.35   |
| 1.17                               | 4.15   | 4.44   | 5.11   | 5.42   | 6.13   | 6.01   | 6.68   | 7.18   | 7.58   | 8.44   | 8.82   |
| 1.22                               | 3.44   | 4.02   | 4.55   | 4.84   | 5.19   | 5.39   | 6.11   | 6.43   | 6.82   | 7.43   | 7.87   |
| 1.27                               | 3.88   | 4.12   | 4.68   | 4.60   | 4.97   | 5.51   | 6.02   | 6.51   | 6.92   | 7.29   | 7.70   |
| 1.32                               | 5.34   | 5.44   | 5.93   | 6.19   | 6.49   | 6.87   | 7.28   | 7.41   | 7.83   | 8.27   | 8.62   |
| 1.37                               | 4.50   | 4.84   | 5.40   | 5.44   | 5.73   | 6.18   | 6.35   | 6.76   | 7.10   | 7.51   | 7.74   |
| 1.42                               | 3.70   | 3.80   | 4.57   | 4.47   | 4.94   | 4.93   | 5.41   | 5.83   | 6.02   | 6.37   | 6.82   |
| 1.47                               | 3.29   | 3.78   | 4.11   | 4.25   | 4.55   | 4.93   | 5.32   | 5.50   | 5.93   | 6.50   | 6.84   |
| 1.52                               | 3.36   | 3.41   | 4.11   | 3.97   | 4.34   | 4.60   | 5.29   | 5.49   | 5.78   | 6.29   | 6.50   |
| 1.57                               | 4.21   | 4.39   | 4.74   | 4.85   | 5.26   | 5.15   | 5.74   | 5.96   | 6.44   | 6.50   | 6.72   |
| 1.62                               | 4.61   | 4.87   | 5.42   | 5.55   | 5.94   | 6.22   | 6.33   | 6.43   | 6.75   | 7.23   | 7.55   |
| 1.67                               | 3.45   | 3.88   | 4.37   | 4.65   | 5.14   | 5.29   | 5.43   | 5.90   | 6.02   | 6.25   | 6.66   |
| 1.72                               | 3.55   | 3.65   | 3.93   | 3.87   | 4.47   | 4.84   | 5.01   | 5.22   | 5.64   | 5.92   | 6.15   |
| 1.77                               | 3.34   | 3.43   | 4.10   | 3.79   | 4.45   | 4.53   | 4.91   | 4.95   | 5.37   | 5.78   | 6.13   |
| 1.82                               | 3.57   | 3.90   | 4.02   | 4.15   | 4.45   | 4.73   | 5.13   | 5.73   | 5.79   | 6.17   | 6.40   |
| 1.87                               | 4.72   | 4.83   | 5.35   | 5.27   | 5.47   | 5.96   | 6.16   | 6.46   | 6.42   | 6.84   | 7.11   |
| 1.92                               | 4.53   | 4.38   | 5.08   | 5.28   | 5.39   | 5.43   | 5.90   | 6.07   | 6.34   | 6.71   | 6.70   |
| 1.97                               | 3.56   | 3.84   | 4.13   | 4.22   | 4.92   | 4.97   | 5.12   | 5.40   | 5.48   | 5.93   | 6.29   |
| 2.02                               | 3.24   | 3.54   | 3.77   | 4.06   | 4.34   | 4.50   | 4.87   | 5.02   | 5.43   | 5.67   | 5.85   |
| 2.07                               | 3.20   | 3.04   | 3.88   | 3.88   | 4.33   | 4.32   | 4.79   | 4.89   | 5.29   | 5.54   | 5.87   |
| 2.12                               | 4.16   | 4.44   | 4.64   | 4.55   | 4.81   | 4.92   | 5.35   | 5.59   | 5.85   | 5.99   | 6.34   |
| 2.17                               | 4.38   | 4.53   | 4.86   | 5.05   | 5.43   | 5.66   | 5.77   | 6.02   | 6.57   | 6.46   | 6.67   |
| 2.22                               | 3.97   | 3.97   | 4.65   | 4.61   | 4.79   | 5.07   | 5.38   | 5.62   | 5.89   | 5.82   | 6.10   |
| 2.27                               | 3.84   | 3.99   | 4.50   | 4.58   | 5.10   | 5.19   | 5.38   | 5.68   | 5.91   | 6.22   | 6.39   |
| 2.32                               | 3.38   | 3.59   | 4.30   | 3.87   | 4.48   | 4.61   | 4.81   | 5.02   | 5.38   | 5.75   | 5.99   |

|      |      |      |      |      |      |      |      |      |      |      |      |
|------|------|------|------|------|------|------|------|------|------|------|------|
| 2.37 | 3.57 | 3.70 | 4.13 | 4.13 | 4.51 | 4.58 | 5.09 | 5.15 | 5.37 | 5.54 | 5.82 |
| 2.42 | 4.04 | 4.33 | 4.88 | 4.56 | 5.20 | 5.47 | 5.63 | 5.74 | 5.89 | 6.37 | 6.42 |
| 2.47 | 4.23 | 4.34 | 4.80 | 4.99 | 5.20 | 5.04 | 5.56 | 5.62 | 5.89 | 6.16 | 6.25 |
| 2.52 | 3.42 | 3.11 | 3.79 | 4.00 | 4.25 | 4.28 | 4.92 | 5.27 | 5.15 | 5.65 | 5.81 |
| 2.57 | 3.42 | 3.34 | 4.07 | 3.58 | 4.26 | 4.37 | 4.83 | 5.27 | 5.28 | 5.63 | 5.87 |
| 2.62 | 2.99 | 3.40 | 3.42 | 3.72 | 3.93 | 4.05 | 4.36 | 4.65 | 4.89 | 5.38 | 5.54 |
| 2.67 | 3.51 | 3.93 | 4.47 | 4.38 | 4.63 | 4.81 | 5.04 | 5.27 | 5.48 | 5.87 | 5.96 |
| 2.72 | 4.34 | 4.48 | 4.91 | 4.84 | 5.38 | 5.51 | 5.91 | 5.92 | 6.16 | 6.22 | 6.58 |
| 2.77 | 4.01 | 4.36 | 4.83 | 4.78 | 5.18 | 5.16 | 5.52 | 5.49 | 5.70 | 5.91 | 5.93 |
| 2.82 | 3.49 | 3.86 | 4.26 | 4.08 | 4.29 | 4.78 | 4.91 | 5.20 | 5.29 | 5.71 | 5.66 |
| 2.87 | 3.49 | 3.51 | 4.18 | 3.83 | 4.47 | 4.39 | 4.94 | 4.94 | 4.93 | 5.51 | 5.78 |
| 2.92 | 3.42 | 3.26 | 3.94 | 3.88 | 4.29 | 4.48 | 4.89 | 5.11 | 5.27 | 5.72 | 5.99 |
| 2.97 | 4.26 | 4.33 | 4.67 | 4.66 | 5.19 | 5.08 | 5.15 | 5.57 | 5.82 | 6.17 | 5.93 |
| 3.02 | 4.81 | 4.83 | 5.11 | 5.17 | 5.47 | 5.73 | 5.90 | 6.02 | 6.16 | 6.40 | 6.52 |
| 3.07 | 3.07 | 3.62 | 3.94 | 4.10 | 4.42 | 4.58 | 4.83 | 5.16 | 5.31 | 5.40 | 5.72 |
| 3.12 | 3.54 | 3.92 | 4.40 | 4.34 | 4.61 | 4.68 | 4.98 | 5.44 | 5.45 | 5.99 | 5.95 |
| 3.17 | 3.35 | 3.38 | 4.13 | 3.89 | 4.28 | 4.41 | 4.84 | 4.64 | 5.02 | 5.32 | 5.58 |
| 3.22 | 4.00 | 3.87 | 4.38 | 4.38 | 4.90 | 5.00 | 5.23 | 5.50 | 5.45 | 5.96 | 6.00 |
| 3.27 | 4.80 | 4.88 | 5.29 | 5.15 | 5.41 | 5.69 | 5.85 | 5.90 | 6.38 | 6.41 | 6.35 |
| 3.32 | 4.14 | 4.12 | 4.66 | 4.52 | 4.91 | 5.13 | 5.24 | 5.51 | 5.86 | 6.05 | 6.26 |
| 3.37 | 3.46 | 3.74 | 4.38 | 4.20 | 4.56 | 4.56 | 5.07 | 5.01 | 5.52 | 5.87 | 5.72 |
| 3.42 | 3.45 | 3.62 | 4.25 | 4.03 | 4.31 | 4.39 | 4.88 | 4.81 | 5.09 | 5.33 | 5.66 |
| 3.47 | 2.96 | 3.07 | 3.65 | 3.54 | 3.97 | 4.22 | 4.53 | 4.85 | 5.14 | 5.53 | 5.53 |
| 3.52 | 4.08 | 4.02 | 4.40 | 4.34 | 4.52 | 4.83 | 5.15 | 5.28 | 5.48 | 5.79 | 6.12 |
| 3.57 | 4.56 | 4.63 | 4.87 | 5.08 | 5.26 | 5.32 | 5.69 | 5.77 | 6.12 | 6.18 | 6.56 |
| 3.62 | 3.70 | 3.83 | 4.30 | 4.18 | 4.58 | 4.70 | 4.90 | 4.94 | 5.35 | 5.54 | 5.73 |
| 3.67 | 3.54 | 3.83 | 3.97 | 3.77 | 4.33 | 4.51 | 4.92 | 5.14 | 5.21 | 5.64 | 5.70 |
| 3.72 | 2.85 | 3.27 | 3.80 | 3.63 | 3.93 | 4.24 | 4.19 | 4.69 | 4.89 | 5.24 | 5.50 |
| 3.92 | 3.47 | 3.55 | 3.82 | 3.89 | 4.13 | 4.39 | 4.57 | 4.69 | 4.90 | 5.38 | 5.33 |
| 4.12 | 4.35 | 4.52 | 4.84 | 4.77 | 4.99 | 4.94 | 5.45 | 5.54 | 5.86 | 6.20 | 6.01 |
| 4.32 | 4.37 | 4.54 | 4.82 | 5.08 | 5.49 | 5.25 | 5.80 | 5.77 | 5.81 | 6.33 | 6.21 |
| 4.52 | 3.18 | 3.47 | 4.28 | 4.07 | 4.45 | 4.57 | 4.91 | 5.27 | 5.21 | 5.76 | 5.74 |
| 4.72 | 3.07 | 3.27 | 3.85 | 3.70 | 4.02 | 4.33 | 4.36 | 4.82 | 4.84 | 5.44 | 5.36 |
| 4.92 | 3.11 | 3.29 | 3.66 | 3.73 | 4.13 | 4.36 | 4.50 | 5.04 | 4.99 | 5.47 | 5.52 |
| 5.12 | 3.67 | 4.13 | 4.48 | 4.25 | 4.95 | 4.56 | 4.92 | 5.29 | 5.06 | 5.60 | 5.64 |
| 5.32 | 4.35 | 4.40 | 5.11 | 5.08 | 5.51 | 5.19 | 5.67 | 5.76 | 6.00 | 6.10 | 6.26 |
| 5.52 | 3.99 | 4.22 | 4.34 | 4.43 | 4.73 | 4.69 | 5.01 | 5.26 | 5.38 | 5.75 | 6.14 |
| 5.72 | 3.78 | 3.73 | 4.29 | 4.24 | 4.54 | 4.70 | 4.94 | 5.22 | 5.35 | 5.66 | 5.78 |
| 5.92 | 3.17 | 3.51 | 3.99 | 3.91 | 4.09 | 4.41 | 4.64 | 4.70 | 5.09 | 5.30 | 5.70 |
| 6.12 | 3.14 | 3.16 | 3.55 | 3.42 | 3.68 | 4.03 | 4.38 | 4.57 | 4.72 | 5.05 | 5.28 |
| 6.32 | 4.12 | 4.50 | 4.69 | 4.44 | 4.77 | 4.83 | 5.07 | 5.19 | 5.41 | 5.56 | 5.76 |
| 6.52 | 4.21 | 4.19 | 4.67 | 4.41 | 4.91 | 4.80 | 4.96 | 5.30 | 5.40 | 5.54 | 5.97 |
| 6.72 | 3.25 | 3.15 | 3.88 | 3.61 | 4.13 | 4.44 | 4.66 | 4.61 | 4.80 | 5.22 | 5.61 |
| 6.92 | 3.58 | 3.74 | 4.07 | 3.98 | 4.65 | 4.27 | 4.81 | 4.83 | 4.96 | 5.28 | 5.29 |
| 7.12 | 2.82 | 2.97 | 3.69 | 3.47 | 3.82 | 3.99 | 4.22 | 4.57 | 4.79 | 4.98 | 5.54 |
| 7.32 | 3.53 | 3.70 | 4.25 | 4.25 | 4.57 | 4.48 | 4.78 | 4.97 | 5.15 | 5.43 | 5.71 |
| 7.52 | 3.93 | 4.37 | 4.80 | 4.77 | 5.05 | 5.13 | 5.48 | 5.53 | 5.51 | 6.08 | 6.11 |
| 7.72 | 4.01 | 4.12 | 4.53 | 4.38 | 4.77 | 4.84 | 5.13 | 5.17 | 5.34 | 5.56 | 5.76 |
| 7.92 | 3.43 | 3.52 | 4.11 | 3.76 | 4.10 | 4.49 | 4.86 | 4.87 | 5.33 | 5.53 | 5.85 |
| 8.12 | 3.00 | 3.33 | 3.65 | 3.48 | 4.05 | 3.99 | 4.20 | 4.30 | 4.97 | 5.07 | 5.28 |

|       |      |      |      |      |      |      |      |      |      |      |      |
|-------|------|------|------|------|------|------|------|------|------|------|------|
| 8.32  | 3.13 | 2.96 | 3.26 | 3.30 | 3.80 | 3.97 | 4.14 | 4.51 | 4.53 | 4.99 | 5.01 |
| 8.52  | 4.02 | 4.39 | 4.55 | 4.70 | 4.84 | 4.95 | 5.29 | 5.40 | 5.58 | 5.83 | 5.93 |
| 8.72  | 3.86 | 3.86 | 4.55 | 4.25 | 4.60 | 4.85 | 4.88 | 5.02 | 5.31 | 5.58 | 5.61 |
| 8.92  | 3.50 | 3.64 | 3.65 | 3.71 | 4.49 | 4.23 | 4.61 | 4.83 | 5.15 | 5.42 | 5.19 |
| 9.12  | 3.67 | 3.92 | 4.35 | 4.20 | 4.58 | 4.69 | 4.93 | 4.94 | 5.37 | 5.62 | 5.79 |
| 9.32  | 2.95 | 3.07 | 3.67 | 3.37 | 3.76 | 3.96 | 4.05 | 4.47 | 4.59 | 4.72 | 4.72 |
| 9.52  | 3.22 | 3.55 | 3.74 | 3.81 | 4.03 | 4.23 | 4.53 | 4.94 | 4.76 | 4.95 | 5.09 |
| 9.72  | 4.37 | 4.32 | 5.05 | 4.61 | 5.08 | 5.24 | 5.48 | 5.52 | 5.83 | 5.94 | 6.10 |
| 9.92  | 4.04 | 3.97 | 4.21 | 4.25 | 4.49 | 4.57 | 4.90 | 4.86 | 5.12 | 5.31 | 5.34 |
| 10.12 | 3.26 | 3.52 | 4.02 | 3.70 | 4.28 | 4.48 | 4.83 | 4.84 | 5.36 | 5.46 | 5.66 |
| 10.32 | 3.43 | 3.44 | 4.10 | 3.93 | 4.20 | 4.33 | 4.51 | 4.72 | 5.25 | 5.41 | 5.31 |
| 10.52 | 2.99 | 3.02 | 3.85 | 3.46 | 3.93 | 3.89 | 4.28 | 4.53 | 4.66 | 4.95 | 5.12 |
| 10.72 | 3.58 | 3.81 | 4.34 | 4.05 | 4.58 | 4.37 | 4.73 | 4.88 | 4.97 | 5.38 | 5.34 |
| 10.92 | 4.10 | 4.28 | 4.59 | 4.52 | 4.73 | 5.07 | 5.26 | 5.42 | 5.56 | 5.93 | 6.09 |
| 11.12 | 3.78 | 3.86 | 4.18 | 4.07 | 4.61 | 4.60 | 4.91 | 4.84 | 5.02 | 5.18 | 5.30 |
| 11.32 | 3.55 | 3.61 | 4.21 | 4.15 | 4.40 | 4.66 | 4.78 | 5.04 | 5.17 | 5.36 | 5.48 |
| 11.52 | 3.00 | 3.39 | 3.88 | 3.84 | 3.88 | 4.29 | 4.51 | 4.65 | 4.83 | 5.08 | 5.29 |
| 11.72 | 3.12 | 3.23 | 3.59 | 3.52 | 4.12 | 3.91 | 4.45 | 4.43 | 4.70 | 5.01 | 5.17 |
| 11.92 | 4.01 | 3.90 | 4.56 | 4.70 | 5.11 | 5.11 | 5.01 | 5.47 | 5.29 | 6.20 | 5.89 |
| 12.12 | 3.35 | 3.61 | 3.94 | 3.89 | 4.34 | 4.32 | 4.65 | 4.75 | 5.14 | 5.31 | 5.54 |
| 12.32 | 3.32 | 3.58 | 3.91 | 3.72 | 3.92 | 4.27 | 4.63 | 4.86 | 4.93 | 5.48 | 5.58 |
| 12.52 | 3.10 | 3.71 | 3.92 | 3.81 | 4.03 | 4.33 | 4.67 | 4.53 | 4.96 | 4.91 | 5.30 |
| 12.72 | 2.84 | 3.21 | 3.58 | 3.47 | 3.68 | 3.89 | 4.13 | 4.51 | 4.89 | 4.78 | 5.10 |
| 12.92 | 3.52 | 3.69 | 4.01 | 4.00 | 4.34 | 4.47 | 4.65 | 4.77 | 4.95 | 5.24 | 5.43 |
| 13.12 | 3.99 | 4.27 | 4.71 | 4.94 | 4.83 | 5.26 | 5.21 | 5.51 | 5.36 | 5.63 | 5.81 |
| 13.32 | 3.74 | 3.87 | 4.25 | 4.43 | 4.66 | 4.35 | 4.67 | 5.16 | 5.04 | 5.08 | 5.30 |
| 13.52 | 3.37 | 3.56 | 3.91 | 3.93 | 4.23 | 4.31 | 4.82 | 4.85 | 4.98 | 5.19 | 5.35 |
| 13.72 | 3.21 | 3.15 | 3.51 | 3.52 | 3.93 | 4.12 | 4.15 | 4.24 | 4.52 | 4.94 | 5.00 |
| 13.92 | 3.09 | 3.10 | 3.75 | 3.59 | 3.98 | 4.05 | 4.27 | 4.60 | 4.68 | 4.87 | 5.13 |
| 14    | 4.14 | 4.04 | 4.85 | 4.49 | 4.83 | 5.04 | 5.09 | 5.23 | 5.20 | 5.88 | 6.07 |
| 14.08 | 4.01 | 4.34 | 4.29 | 4.25 | 4.48 | 4.31 | 5.11 | 5.06 | 5.09 | 5.50 | 5.59 |
| 14.17 | 3.42 | 3.42 | 4.16 | 4.05 | 4.10 | 4.16 | 4.70 | 4.57 | 4.87 | 4.99 | 5.24 |
| 14.27 | 3.82 | 4.00 | 4.49 | 4.20 | 4.51 | 4.68 | 5.14 | 5.36 | 5.32 | 5.80 | 5.73 |
| 14.38 | 2.76 | 3.08 | 3.67 | 3.36 | 3.88 | 3.99 | 4.32 | 4.45 | 4.59 | 4.89 | 5.09 |
| 14.49 | 3.42 | 3.63 | 3.97 | 3.95 | 4.31 | 4.15 | 4.60 | 4.58 | 4.84 | 5.18 | 5.15 |
| 14.61 | 4.45 | 4.33 | 4.68 | 4.74 | 4.91 | 4.97 | 5.53 | 5.47 | 5.55 | 5.82 | 6.02 |
| 14.75 | 3.39 | 3.54 | 4.27 | 4.21 | 4.34 | 4.64 | 4.95 | 4.93 | 5.02 | 5.49 | 5.57 |
| 14.89 | 3.37 | 3.69 | 3.88 | 3.92 | 4.38 | 4.35 | 4.66 | 5.00 | 5.16 | 5.55 | 5.64 |
| 15.05 | 3.01 | 3.37 | 3.56 | 3.46 | 3.94 | 3.98 | 4.28 | 4.66 | 4.72 | 5.01 | 5.07 |
| 15.21 | 2.63 | 2.92 | 3.29 | 3.30 | 3.72 | 4.08 | 4.21 | 4.16 | 4.36 | 4.72 | 5.02 |
| 15.39 | 3.88 | 4.08 | 4.26 | 4.42 | 4.62 | 4.61 | 4.95 | 4.91 | 4.92 | 5.40 | 5.65 |
| 15.59 | 3.91 | 4.09 | 4.06 | 4.17 | 4.56 | 4.50 | 4.84 | 5.05 | 5.14 | 5.45 | 5.62 |
| 15.8  | 3.51 | 3.49 | 3.84 | 3.91 | 4.30 | 4.43 | 4.62 | 4.75 | 4.89 | 5.15 | 5.21 |
| 16.02 | 3.85 | 3.77 | 4.25 | 4.12 | 4.39 | 4.66 | 4.99 | 4.84 | 5.41 | 5.65 | 5.56 |
| 16.27 | 2.69 | 3.04 | 3.49 | 3.22 | 3.79 | 3.75 | 4.21 | 4.28 | 4.55 | 4.74 | 4.91 |
| 16.53 | 3.17 | 3.21 | 3.69 | 3.71 | 3.98 | 4.09 | 4.13 | 4.51 | 4.74 | 5.33 | 4.97 |
| 16.81 | 4.08 | 4.50 | 4.73 | 4.56 | 4.67 | 5.00 | 5.02 | 5.39 | 5.50 | 5.78 | 5.90 |
| 17.12 | 3.48 | 3.78 | 4.09 | 3.96 | 4.35 | 4.57 | 4.85 | 4.85 | 5.03 | 5.17 | 5.21 |
| 17.45 | 3.47 | 3.55 | 3.86 | 4.05 | 4.38 | 4.46 | 4.56 | 4.70 | 4.91 | 5.52 | 5.46 |
| 17.81 | 3.32 | 3.52 | 3.87 | 3.78 | 4.08 | 4.37 | 4.32 | 4.61 | 4.85 | 5.01 | 5.17 |



|        |      |      |      |      |      |      |      |      |      |      |      |
|--------|------|------|------|------|------|------|------|------|------|------|------|
| 18.19  | 2.44 | 2.67 | 2.95 | 3.20 | 3.46 | 3.71 | 3.91 | 4.01 | 4.27 | 4.56 | 4.77 |
| 18.6   | 3.91 | 3.64 | 4.38 | 4.43 | 4.51 | 4.43 | 5.02 | 4.88 | 5.23 | 5.30 | 5.65 |
| 19.05  | 4.03 | 4.06 | 4.38 | 4.48 | 4.75 | 4.73 | 5.06 | 5.19 | 5.28 | 5.53 | 5.56 |
| 19.53  | 3.29 | 3.60 | 3.76 | 4.11 | 4.42 | 4.44 | 4.59 | 5.02 | 5.04 | 5.46 | 5.52 |
| 20.05  | 3.39 | 3.76 | 3.99 | 3.96 | 4.35 | 4.03 | 4.64 | 4.74 | 5.04 | 5.28 | 5.50 |
| 20.61  | 3.37 | 3.35 | 3.69 | 3.76 | 3.87 | 3.98 | 4.44 | 4.48 | 4.55 | 4.99 | 5.08 |
| 21.22  | 3.31 | 3.38 | 3.56 | 3.53 | 3.86 | 3.93 | 4.33 | 4.62 | 4.67 | 4.84 | 5.25 |
| 21.87  | 4.05 | 4.30 | 4.37 | 4.53 | 4.76 | 4.94 | 5.20 | 5.20 | 5.56 | 5.59 | 5.73 |
| 22.57  | 3.36 | 3.66 | 4.01 | 3.95 | 4.16 | 4.34 | 4.88 | 4.79 | 5.06 | 5.31 | 5.24 |
| 23.33  | 3.18 | 3.07 | 3.80 | 3.59 | 4.10 | 4.10 | 4.52 | 4.31 | 4.42 | 5.12 | 4.99 |
| 24.15  | 3.20 | 3.61 | 3.94 | 3.85 | 4.13 | 4.39 | 4.55 | 4.70 | 4.66 | 5.12 | 5.07 |
| 25.03  | 2.75 | 2.96 | 3.51 | 3.30 | 3.68 | 3.82 | 3.98 | 4.42 | 4.41 | 4.68 | 4.90 |
| 25.98  | 3.61 | 3.81 | 4.22 | 3.96 | 4.52 | 4.70 | 4.89 | 4.89 | 5.21 | 5.09 | 5.36 |
| 27.01  | 4.12 | 3.97 | 4.16 | 4.59 | 4.59 | 4.85 | 4.95 | 4.92 | 5.40 | 5.40 | 5.64 |
| 28.11  | 3.24 | 3.38 | 3.76 | 3.83 | 4.09 | 4.44 | 4.55 | 4.64 | 5.03 | 5.06 | 5.09 |
| 29.3   | 3.53 | 3.49 | 3.96 | 3.99 | 4.05 | 4.06 | 4.42 | 4.64 | 4.91 | 5.09 | 5.17 |
| 30.59  | 2.74 | 3.02 | 3.52 | 3.46 | 3.78 | 3.81 | 4.19 | 4.28 | 4.67 | 4.60 | 5.20 |
| 31.98  | 2.89 | 3.36 | 3.46 | 3.54 | 4.02 | 4.21 | 4.22 | 4.41 | 4.57 | 4.77 | 4.97 |
| 33.47  | 3.79 | 3.81 | 4.21 | 4.05 | 4.21 | 4.46 | 4.67 | 4.80 | 4.90 | 5.30 | 5.36 |
| 35.09  | 3.61 | 3.73 | 4.13 | 4.17 | 4.53 | 4.55 | 5.13 | 4.98 | 4.96 | 5.12 | 5.30 |
| 36.83  | 3.39 | 3.38 | 4.04 | 3.71 | 4.13 | 4.32 | 4.47 | 4.62 | 4.94 | 5.17 | 5.35 |
| 38.71  | 3.50 | 3.60 | 4.21 | 3.99 | 4.46 | 4.33 | 4.76 | 4.82 | 4.68 | 5.19 | 5.15 |
| 40.73  | 2.66 | 2.61 | 3.60 | 3.30 | 3.75 | 3.82 | 4.19 | 4.28 | 4.53 | 4.84 | 4.74 |
| 42.92  | 3.15 | 3.59 | 3.87 | 3.75 | 3.94 | 4.27 | 4.24 | 4.36 | 4.68 | 5.18 | 5.38 |
| 45.27  | 3.94 | 4.15 | 4.61 | 4.76 | 4.85 | 4.84 | 4.99 | 5.32 | 5.34 | 5.39 | 5.68 |
| 47.81  | 3.54 | 3.60 | 4.16 | 4.07 | 4.12 | 4.33 | 4.46 | 4.66 | 4.83 | 5.11 | 5.15 |
| 50.55  | 3.26 | 3.23 | 3.84 | 3.76 | 3.90 | 4.29 | 4.45 | 4.58 | 4.82 | 5.15 | 5.12 |
| 53.51  | 3.16 | 3.11 | 3.21 | 3.36 | 3.96 | 4.04 | 4.23 | 4.45 | 4.45 | 4.66 | 4.82 |
| 56.69  | 2.54 | 2.75 | 3.31 | 3.23 | 3.64 | 3.73 | 4.20 | 4.12 | 4.42 | 4.57 | 4.85 |
| 60.13  | 3.86 | 3.88 | 4.33 | 4.25 | 4.56 | 4.38 | 4.78 | 5.01 | 5.28 | 5.44 | 5.44 |
| 63.84  | 3.46 | 3.70 | 4.10 | 4.13 | 4.06 | 4.33 | 4.88 | 4.57 | 4.79 | 5.03 | 5.12 |
| 67.83  | 3.48 | 3.62 | 4.06 | 3.91 | 4.25 | 4.24 | 4.59 | 4.69 | 4.74 | 4.80 | 4.97 |
| 72.15  | 3.65 | 3.69 | 4.12 | 4.10 | 4.25 | 4.33 | 4.65 | 4.65 | 4.59 | 5.30 | 5.27 |
| 76.8   | 2.87 | 3.17 | 3.25 | 3.39 | 3.76 | 3.70 | 4.00 | 4.01 | 4.03 | 4.50 | 4.62 |
| 81.81  | 3.20 | 3.13 | 3.79 | 3.61 | 3.99 | 4.34 | 4.51 | 4.74 | 4.69 | 4.89 | 4.94 |
| 87.22  | 4.27 | 4.04 | 4.59 | 4.58 | 4.56 | 4.59 | 5.07 | 4.80 | 5.07 | 5.21 | 5.39 |
| 93.06  | 3.47 | 3.16 | 3.58 | 3.79 | 4.04 | 4.13 | 4.21 | 4.55 | 4.33 | 4.78 | 5.02 |
| 99.35  | 3.26 | 3.41 | 3.98 | 3.81 | 4.30 | 3.83 | 4.33 | 4.61 | 4.50 | 4.89 | 4.82 |
| 106.13 | 3.51 | 3.34 | 4.02 | 3.76 | 3.98 | 4.09 | 4.27 | 4.51 | 4.50 | 4.93 | 4.84 |
| 113.45 | 3.09 | 3.12 | 3.57 | 3.29 | 3.75 | 4.07 | 4.05 | 4.30 | 4.51 | 4.67 | 4.92 |
| 121.34 | 4.10 | 4.11 | 4.28 | 4.20 | 4.33 | 4.46 | 4.76 | 4.72 | 4.93 | 5.31 | 5.29 |
| 129.86 | 3.82 | 4.14 | 4.31 | 4.25 | 4.25 | 4.29 | 4.63 | 4.72 | 4.57 | 5.07 | 5.30 |
| 139.04 | 3.05 | 2.91 | 3.49 | 3.42 | 3.44 | 3.79 | 4.06 | 4.15 | 4.24 | 4.54 | 4.78 |
| 148.94 | 3.38 | 3.33 | 3.72 | 3.92 | 3.90 | 4.19 | 4.42 | 4.51 | 4.69 | 4.84 | 5.29 |
| 159.62 | 3.12 | 3.04 | 3.28 | 3.40 | 3.49 | 3.57 | 3.83 | 4.20 | 4.14 | 4.40 | 4.68 |
| 171.14 | 3.25 | 3.20 | 3.41 | 3.67 | 3.74 | 3.85 | 3.71 | 4.17 | 4.23 | 4.26 | 4.37 |
| 183.56 | 3.88 | 3.75 | 4.32 | 4.56 | 4.66 | 4.27 | 4.78 | 4.74 | 4.68 | 5.08 | 5.20 |
| 196.96 | 3.26 | 3.38 | 3.92 | 3.85 | 3.86 | 3.98 | 4.09 | 4.46 | 4.61 | 4.61 | 4.41 |
| 211.41 | 3.13 | 3.47 | 3.87 | 3.82 | 4.10 | 4.14 | 4.31 | 4.51 | 4.21 | 4.82 | 5.09 |
| 226.99 | 3.65 | 3.81 | 3.83 | 4.08 | 4.29 | 4.22 | 4.38 | 4.60 | 4.64 | 4.67 | 5.01 |

|         |      |      |      |      |      |      |      |      |      |      |      |
|---------|------|------|------|------|------|------|------|------|------|------|------|
| 243.8   | 3.10 | 3.29 | 3.79 | 3.39 | 3.86 | 3.79 | 3.92 | 4.35 | 4.06 | 4.24 | 4.54 |
| 261.93  | 3.63 | 3.51 | 4.03 | 3.93 | 4.09 | 4.17 | 4.41 | 4.38 | 4.61 | 4.66 | 4.79 |
| 281.48  | 4.03 | 4.07 | 4.22 | 4.42 | 4.32 | 4.42 | 4.60 | 4.65 | 4.67 | 4.82 | 4.87 |
| 302.56  | 3.16 | 3.22 | 3.48 | 3.49 | 3.83 | 3.43 | 3.90 | 4.08 | 4.25 | 4.23 | 4.47 |
| 325.3   | 3.54 | 3.46 | 3.61 | 3.53 | 3.86 | 4.11 | 4.31 | 4.13 | 4.34 | 4.61 | 4.42 |
| 349.83  | 3.13 | 3.32 | 3.74 | 3.34 | 3.83 | 3.86 | 4.06 | 4.20 | 4.20 | 4.12 | 4.41 |
| 376.28  | 2.87 | 3.22 | 3.21 | 3.19 | 3.50 | 3.78 | 3.83 | 3.83 | 4.04 | 4.14 | 4.08 |
| 404.81  | 4.16 | 4.21 | 4.67 | 4.20 | 4.45 | 4.45 | 4.67 | 4.51 | 4.96 | 4.84 | 4.94 |
| 435.58  | 4.01 | 3.72 | 4.18 | 3.76 | 4.29 | 4.15 | 4.07 | 4.37 | 4.21 | 4.41 | 4.32 |
| 468.76  | 3.19 | 3.16 | 3.71 | 3.69 | 3.90 | 3.61 | 3.97 | 3.94 | 4.11 | 4.26 | 4.32 |
| 504.55  | 3.52 | 3.54 | 3.85 | 3.68 | 3.90 | 4.03 | 4.25 | 4.25 | 4.25 | 4.51 | 4.48 |
| 543.15  | 3.16 | 3.14 | 3.52 | 3.38 | 3.34 | 3.43 | 4.03 | 3.75 | 3.88 | 3.97 | 4.02 |
| 584.78  | 3.60 | 3.72 | 3.72 | 3.74 | 3.84 | 3.97 | 3.99 | 4.22 | 4.04 | 4.29 | 4.34 |
| 629.68  | 3.72 | 3.54 | 3.94 | 3.96 | 4.16 | 4.23 | 4.48 | 4.47 | 4.25 | 4.44 | 4.52 |
| 678.1   | 3.07 | 3.20 | 3.74 | 3.47 | 3.62 | 3.75 | 3.69 | 3.70 | 4.00 | 4.17 | 4.18 |
| 730.33  | 3.04 | 3.00 | 3.64 | 3.20 | 3.75 | 3.54 | 3.80 | 3.83 | 3.95 | 4.17 | 4.15 |
| 786.65  | 3.66 | 3.74 | 4.14 | 3.71 | 4.21 | 3.92 | 4.27 | 4.27 | 4.08 | 4.44 | 4.48 |
| 847.4   | 2.98 | 2.83 | 3.48 | 3.07 | 3.39 | 3.23 | 3.39 | 3.41 | 3.65 | 3.81 | 4.04 |
| 912.92  | 3.88 | 3.94 | 4.03 | 4.12 | 4.45 | 4.15 | 4.35 | 4.33 | 4.21 | 4.45 | 4.54 |
| 983.58  | 3.85 | 3.79 | 4.02 | 3.92 | 3.86 | 3.87 | 4.22 | 4.04 | 4.04 | 4.21 | 4.31 |
| 1059.78 | 3.28 | 3.53 | 3.67 | 3.32 | 3.39 | 3.48 | 3.73 | 3.64 | 3.63 | 3.91 | 3.97 |
| 1141.98 | 3.87 | 3.68 | 3.87 | 3.72 | 3.96 | 3.94 | 3.95 | 3.95 | 4.04 | 4.10 | 4.08 |
| 1230.62 | 3.03 | 3.04 | 3.42 | 2.98 | 3.07 | 3.24 | 3.20 | 3.40 | 3.46 | 3.59 | 3.55 |
| 1326.23 | 3.16 | 3.39 | 3.56 | 3.34 | 3.84 | 3.51 | 3.71 | 4.08 | 3.82 | 4.01 | 4.01 |
| 1429.34 | 4.26 | 4.06 | 4.34 | 4.01 | 3.97 | 4.20 | 4.12 | 4.33 | 4.22 | 4.37 | 4.44 |
| 1540.54 | 3.53 | 3.36 | 3.59 | 3.33 | 3.50 | 3.69 | 3.56 | 3.67 | 3.58 | 3.99 | 3.79 |
| 1660.48 | 3.22 | 3.19 | 3.14 | 3.25 | 3.50 | 3.41 | 3.65 | 3.86 | 3.72 | 3.97 | 4.02 |
| 1789.83 | 3.60 | 3.51 | 4.02 | 3.88 | 3.75 | 3.73 | 3.94 | 3.96 | 3.98 | 4.06 | 4.34 |
| 1929.34 | 2.97 | 3.03 | 3.11 | 3.24 | 3.57 | 3.63 | 3.65 | 3.91 | 3.89 | 4.03 | 3.89 |
| 2079.8  | 4.15 | 4.10 | 4.51 | 4.07 | 4.13 | 4.19 | 4.40 | 4.16 | 4.09 | 4.44 | 4.24 |
| 2242.08 | 3.91 | 3.70 | 3.88 | 4.12 | 4.16 | 3.84 | 4.24 | 4.13 | 4.09 | 4.21 | 4.37 |
| 2417.1  | 2.85 | 2.91 | 3.17 | 3.03 | 3.44 | 3.22 | 3.49 | 3.57 | 3.51 | 3.88 | 3.87 |
| 2605.85 | 3.52 | 3.43 | 3.98 | 3.71 | 3.77 | 3.55 | 3.62 | 4.00 | 4.17 | 4.27 | 4.13 |
| 2809.43 | 3.10 | 3.14 | 3.28 | 3.42 | 3.16 | 3.27 | 3.74 | 3.80 | 3.45 | 3.76 | 3.82 |
| 3028.99 | 3.82 | 3.65 | 3.83 | 3.51 | 3.65 | 3.72 | 3.53 | 3.71 | 4.03 | 3.99 | 3.99 |
| 3265.79 | 3.65 | 3.67 | 4.00 | 3.97 | 3.97 | 3.72 | 4.03 | 4.01 | 3.82 | 4.16 | 4.07 |
| 3521.18 | 3.09 | 3.04 | 3.50 | 3.37 | 3.22 | 3.35 | 3.48 | 3.53 | 3.58 | 3.71 | 3.71 |
| 3796.62 | 3.45 | 3.40 | 3.51 | 3.42 | 3.66 | 3.48 | 3.68 | 3.61 | 3.95 | 3.83 | 3.95 |

| Wavelength (nm) \ Time (ps) | 398.17 | 399.58 | 400.99 | 402.40 | 403.81 | 405.22 | 406.63 | 408.03 | 409.44 | 410.85 | 412.26 |
|-----------------------------|--------|--------|--------|--------|--------|--------|--------|--------|--------|--------|--------|
| -3.28                       | -0.23  | -0.05  | -0.13  | 0.02   | -0.04  | -0.09  | 0.07   | -0.12  | -0.04  | 0.13   | 0.16   |
| -2.78                       | -0.12  | 0.25   | 0.05   | -0.15  | -0.13  | 0.07   | -0.15  | -0.05  | 0.15   | -0.10  | 0.19   |
| -2.28                       | -0.02  | -0.29  | 0.08   | -0.14  | 0.09   | 0.19   | -0.15  | 0.03   | 0.21   | 0.17   | -0.02  |
| -1.78                       | 0.00   | 0.13   | -0.16  | 0.31   | 0.12   | -0.08  | 0.01   | 0.09   | 0.02   | -0.01  | -0.24  |
| -1.28                       | 0.01   | 0.03   | 0.16   | 0.17   | -0.23  | 0.06   | 0.35   | -0.22  | -0.36  | -0.23  | -0.18  |
| -0.78                       | 0.24   | 0.09   | 0.11   | -0.16  | 0.10   | 0.18   | 0.14   | 0.41   | 0.08   | 0.16   | 0.04   |
| -0.28                       | 0.15   | 0.00   | -0.07  | -0.15  | 0.22   | -0.22  | -0.02  | 0.10   | -0.22  | -0.08  | -0.04  |

|      |       |       |       |       |       |       |       |       |       |       |       |
|------|-------|-------|-------|-------|-------|-------|-------|-------|-------|-------|-------|
| 0.22 | -0.03 | -0.16 | -0.04 | 0.09  | -0.13 | -0.13 | -0.23 | -0.24 | 0.15  | -0.04 | 0.09  |
| 0.32 | -0.03 | -0.09 | -0.10 | 0.09  | -0.21 | 0.23  | 0.34  | 0.00  | -0.31 | 0.21  | -0.03 |
| 0.42 | -0.25 | -0.01 | -0.05 | -0.24 | -0.08 | -0.04 | -0.06 | -0.05 | -0.08 | -0.01 | -0.03 |
| 0.52 | 0.13  | 0.00  | 0.03  | 0.08  | 0.05  | 0.12  | 0.01  | -0.02 | -0.06 | 0.03  | -0.12 |
| 0.62 | 0.15  | 0.36  | 0.09  | 0.10  | -0.09 | 0.20  | 0.31  | 0.45  | -0.16 | 0.52  | 0.07  |
| 0.72 | -0.19 | -0.05 | 0.06  | -0.01 | 0.02  | 0.16  | -0.20 | -0.06 | -0.27 | 0.14  | 0.15  |
| 0.77 | -0.03 | -0.13 | 0.03  | 0.04  | 0.02  | 0.10  | -0.01 | 0.37  | -0.07 | 0.08  | 0.05  |
| 0.82 | -0.18 | 0.07  | 0.20  | -0.05 | 0.25  | 0.03  | 0.08  | 0.06  | -0.13 | -0.20 | 0.04  |
| 0.87 | 0.04  | 0.25  | 0.01  | 0.19  | -0.10 | -0.02 | 0.12  | 0.12  | 0.08  | 0.24  | 0.06  |
| 0.92 | -0.46 | -0.30 | -0.43 | -0.05 | -0.06 | 0.16  | -0.19 | -0.24 | -0.19 | -0.08 | -0.14 |
| 0.97 | 0.51  | -0.15 | -1.27 | -1.47 | -1.05 | -0.61 | -0.65 | -0.63 | -0.18 | 0.02  | -0.41 |
| 1.02 | 3.10  | 2.21  | 1.56  | 0.06  | -0.52 | -0.46 | -0.56 | -0.59 | -0.46 | -0.35 | -0.04 |
| 1.07 | 7.03  | 5.81  | 4.36  | 3.34  | 2.71  | 2.30  | 1.84  | 2.16  | 1.62  | 1.61  | 1.54  |
| 1.12 | 9.75  | 9.87  | 10.05 | 9.77  | 9.58  | 9.32  | 9.27  | 9.43  | 8.84  | 8.84  | 8.76  |
| 1.17 | 9.00  | 9.63  | 9.80  | 9.91  | 10.02 | 10.25 | 10.30 | 9.77  | 10.12 | 10.34 | 10.32 |
| 1.22 | 8.19  | 8.35  | 8.82  | 8.81  | 9.07  | 9.52  | 9.62  | 10.17 | 10.25 | 10.54 | 11.02 |
| 1.27 | 8.02  | 7.89  | 8.25  | 7.88  | 8.48  | 8.73  | 8.61  | 8.91  | 9.02  | 10.07 | 10.14 |
| 1.32 | 8.89  | 8.66  | 8.76  | 8.79  | 8.87  | 8.82  | 9.15  | 9.58  | 9.49  | 10.05 | 10.48 |
| 1.37 | 7.93  | 7.88  | 7.82  | 7.55  | 7.77  | 7.86  | 7.95  | 8.23  | 8.59  | 9.47  | 10.04 |
| 1.42 | 7.03  | 7.19  | 7.18  | 6.93  | 7.33  | 7.54  | 7.33  | 7.80  | 8.08  | 8.60  | 8.85  |
| 1.47 | 6.82  | 7.10  | 7.07  | 7.42  | 7.46  | 7.51  | 7.78  | 8.22  | 7.72  | 8.44  | 8.73  |
| 1.52 | 6.70  | 6.74  | 7.01  | 6.45  | 6.99  | 6.93  | 7.18  | 7.44  | 7.56  | 8.26  | 8.42  |
| 1.57 | 6.85  | 6.62  | 6.56  | 6.83  | 6.79  | 6.86  | 6.71  | 7.48  | 7.38  | 8.12  | 8.38  |
| 1.62 | 7.51  | 7.72  | 7.04  | 7.19  | 7.28  | 7.63  | 7.38  | 7.26  | 7.96  | 7.75  | 8.25  |
| 1.67 | 6.83  | 6.84  | 6.96  | 6.89  | 6.88  | 6.82  | 6.96  | 7.11  | 7.30  | 7.67  | 7.53  |
| 1.72 | 6.18  | 6.34  | 6.53  | 6.49  | 6.50  | 6.37  | 6.37  | 6.76  | 6.77  | 7.45  | 7.22  |
| 1.77 | 6.29  | 6.16  | 6.17  | 6.11  | 6.32  | 6.30  | 6.20  | 6.42  | 6.34  | 6.88  | 7.35  |
| 1.82 | 6.48  | 6.31  | 6.69  | 6.36  | 6.39  | 6.37  | 6.86  | 6.74  | 6.59  | 7.40  | 7.78  |
| 1.87 | 7.15  | 7.08  | 6.73  | 6.50  | 6.60  | 6.55  | 6.09  | 6.78  | 6.67  | 7.15  | 7.32  |
| 1.92 | 6.69  | 6.43  | 6.41  | 6.52  | 6.29  | 6.14  | 6.55  | 7.13  | 6.75  | 7.06  | 7.63  |
| 1.97 | 6.25  | 6.39  | 6.19  | 6.36  | 6.14  | 6.19  | 6.07  | 6.55  | 6.31  | 7.19  | 6.97  |
| 2.02 | 6.14  | 6.16  | 6.14  | 5.86  | 5.95  | 6.23  | 6.33  | 6.42  | 6.53  | 6.77  | 7.09  |
| 2.07 | 5.91  | 5.84  | 5.93  | 5.74  | 5.92  | 6.36  | 6.03  | 6.49  | 6.39  | 7.20  | 7.09  |
| 2.12 | 6.46  | 6.20  | 6.29  | 5.86  | 5.85  | 6.20  | 5.79  | 6.25  | 6.17  | 6.42  | 6.71  |
| 2.17 | 6.71  | 6.53  | 6.59  | 6.30  | 6.52  | 6.51  | 6.33  | 6.52  | 6.26  | 6.93  | 7.12  |
| 2.22 | 6.26  | 6.12  | 6.09  | 6.11  | 5.76  | 5.90  | 5.96  | 6.08  | 6.00  | 6.46  | 6.57  |
| 2.27 | 6.50  | 6.53  | 6.30  | 6.26  | 6.22  | 6.23  | 6.29  | 6.76  | 6.69  | 7.05  | 7.33  |
| 2.32 | 5.91  | 5.96  | 5.94  | 5.93  | 6.04  | 6.10  | 5.76  | 6.32  | 6.38  | 6.81  | 6.70  |
| 2.37 | 5.98  | 6.20  | 6.01  | 5.68  | 5.69  | 5.76  | 5.95  | 6.17  | 6.19  | 6.59  | 6.64  |
| 2.42 | 6.44  | 6.43  | 6.40  | 6.01  | 5.98  | 5.98  | 6.27  | 6.35  | 6.38  | 6.81  | 7.15  |
| 2.47 | 6.29  | 6.30  | 6.12  | 5.98  | 5.79  | 5.82  | 6.42  | 6.16  | 6.18  | 6.44  | 6.70  |
| 2.52 | 6.03  | 5.97  | 6.02  | 5.60  | 5.52  | 5.76  | 5.65  | 5.48  | 5.98  | 6.59  | 6.40  |
| 2.57 | 5.78  | 5.98  | 5.77  | 5.93  | 5.39  | 5.94  | 5.79  | 5.81  | 5.56  | 6.20  | 6.21  |
| 2.62 | 5.48  | 5.53  | 5.48  | 5.55  | 5.53  | 5.69  | 5.72  | 6.15  | 6.01  | 6.18  | 6.24  |
| 2.67 | 6.32  | 5.89  | 5.93  | 5.95  | 5.85  | 5.81  | 6.11  | 6.03  | 6.27  | 6.63  | 6.17  |
| 2.72 | 6.46  | 6.28  | 6.46  | 6.06  | 6.23  | 6.44  | 6.05  | 6.00  | 5.95  | 6.49  | 6.83  |
| 2.77 | 6.20  | 6.01  | 6.02  | 5.53  | 5.78  | 5.46  | 5.46  | 5.91  | 6.04  | 5.85  | 6.15  |
| 2.82 | 5.82  | 5.96  | 5.87  | 5.72  | 5.98  | 5.71  | 5.72  | 5.87  | 6.15  | 6.08  | 6.56  |
| 2.87 | 5.81  | 5.92  | 5.68  | 5.43  | 5.58  | 5.70  | 5.75  | 5.98  | 6.00  | 6.34  | 6.31  |
| 2.92 | 5.90  | 6.02  | 5.92  | 5.80  | 6.09  | 5.82  | 6.20  | 6.12  | 5.80  | 6.19  | 6.42  |

|       |      |      |      |      |      |      |      |      |      |      |      |
|-------|------|------|------|------|------|------|------|------|------|------|------|
| 2.97  | 6.08 | 6.11 | 5.94 | 5.66 | 5.48 | 5.75 | 5.46 | 5.78 | 5.70 | 6.10 | 6.46 |
| 3.02  | 6.26 | 6.09 | 6.26 | 6.02 | 5.83 | 5.54 | 5.83 | 5.72 | 5.93 | 6.32 | 6.48 |
| 3.07  | 5.97 | 5.78 | 5.67 | 5.34 | 5.34 | 5.69 | 5.13 | 5.54 | 5.59 | 5.95 | 5.85 |
| 3.12  | 6.36 | 6.24 | 6.03 | 5.77 | 6.02 | 6.15 | 5.90 | 6.39 | 6.06 | 6.52 | 6.69 |
| 3.17  | 5.74 | 5.81 | 5.61 | 5.40 | 5.42 | 5.54 | 5.38 | 5.92 | 5.39 | 6.19 | 6.21 |
| 3.22  | 5.94 | 5.98 | 5.92 | 6.03 | 5.96 | 5.72 | 5.59 | 5.69 | 6.26 | 6.73 | 6.90 |
| 3.27  | 6.60 | 6.54 | 6.43 | 5.93 | 5.93 | 5.93 | 5.60 | 6.05 | 6.26 | 6.52 | 6.51 |
| 3.32  | 5.88 | 6.05 | 5.86 | 5.53 | 5.62 | 5.50 | 5.33 | 5.94 | 5.87 | 6.56 | 6.38 |
| 3.37  | 5.86 | 5.85 | 5.75 | 5.68 | 5.55 | 5.48 | 5.20 | 5.75 | 5.79 | 6.08 | 6.50 |
| 3.42  | 5.69 | 5.57 | 5.40 | 5.53 | 5.38 | 5.60 | 5.64 | 5.55 | 5.59 | 5.90 | 6.00 |
| 3.47  | 5.86 | 5.91 | 5.75 | 5.55 | 5.37 | 5.41 | 5.54 | 6.00 | 5.86 | 6.27 | 6.14 |
| 3.52  | 5.86 | 5.93 | 5.74 | 5.53 | 5.77 | 5.94 | 5.99 | 5.85 | 6.20 | 6.50 | 6.52 |
| 3.57  | 6.56 | 6.63 | 6.23 | 6.06 | 6.01 | 5.75 | 6.29 | 5.90 | 5.88 | 6.43 | 6.57 |
| 3.62  | 5.76 | 5.59 | 5.41 | 5.33 | 5.42 | 5.76 | 5.81 | 5.80 | 5.80 | 5.95 | 5.85 |
| 3.67  | 5.90 | 5.92 | 5.63 | 5.41 | 5.63 | 5.46 | 5.49 | 5.48 | 5.15 | 6.01 | 6.23 |
| 3.72  | 5.70 | 5.54 | 5.62 | 5.40 | 5.38 | 5.45 | 5.58 | 5.99 | 5.79 | 5.88 | 6.34 |
| 3.92  | 5.33 | 5.55 | 5.09 | 5.37 | 5.33 | 5.41 | 5.42 | 5.24 | 5.61 | 6.07 | 6.15 |
| 4.12  | 6.43 | 6.04 | 6.15 | 5.88 | 5.72 | 5.71 | 6.05 | 5.56 | 5.78 | 6.54 | 6.50 |
| 4.32  | 6.29 | 6.44 | 6.19 | 5.59 | 5.88 | 5.39 | 5.63 | 5.92 | 5.92 | 6.36 | 6.24 |
| 4.52  | 5.81 | 5.91 | 5.67 | 5.71 | 5.97 | 5.71 | 5.40 | 5.69 | 6.03 | 6.19 | 6.27 |
| 4.72  | 5.51 | 5.67 | 5.58 | 5.58 | 5.46 | 5.59 | 5.68 | 5.52 | 5.46 | 6.08 | 6.17 |
| 4.92  | 5.53 | 5.45 | 5.55 | 5.07 | 5.50 | 5.54 | 5.67 | 5.69 | 5.60 | 6.13 | 6.01 |
| 5.12  | 5.83 | 5.77 | 5.32 | 5.23 | 5.38 | 5.63 | 5.40 | 5.40 | 5.69 | 6.00 | 5.95 |
| 5.32  | 6.31 | 6.41 | 5.88 | 5.56 | 6.12 | 5.73 | 5.45 | 5.81 | 5.88 | 5.92 | 6.27 |
| 5.52  | 5.80 | 5.95 | 5.59 | 5.63 | 5.25 | 5.47 | 5.39 | 5.90 | 5.70 | 6.27 | 6.34 |
| 5.72  | 5.91 | 5.80 | 5.90 | 5.65 | 5.54 | 5.83 | 5.32 | 5.60 | 5.57 | 5.80 | 6.00 |
| 5.92  | 5.62 | 5.62 | 5.66 | 5.70 | 5.54 | 5.47 | 5.73 | 6.05 | 5.78 | 5.87 | 6.11 |
| 6.12  | 5.45 | 5.22 | 5.23 | 5.40 | 5.18 | 5.34 | 5.32 | 5.15 | 5.37 | 5.92 | 5.73 |
| 6.32  | 5.81 | 5.93 | 5.58 | 5.41 | 5.23 | 5.29 | 5.59 | 5.63 | 5.80 | 6.11 | 6.24 |
| 6.52  | 6.14 | 5.74 | 5.75 | 5.51 | 5.46 | 5.21 | 5.14 | 5.59 | 5.21 | 5.76 | 5.97 |
| 6.72  | 5.51 | 5.49 | 5.62 | 5.22 | 5.24 | 5.25 | 5.29 | 5.43 | 4.98 | 5.99 | 5.64 |
| 6.92  | 5.36 | 5.54 | 5.23 | 5.14 | 5.20 | 5.07 | 5.46 | 5.26 | 5.40 | 5.84 | 5.70 |
| 7.12  | 5.22 | 5.64 | 5.32 | 5.23 | 5.42 | 5.17 | 5.27 | 5.16 | 5.76 | 5.78 | 5.97 |
| 7.32  | 5.73 | 5.55 | 5.21 | 5.33 | 5.10 | 4.96 | 5.18 | 5.61 | 5.23 | 5.87 | 6.19 |
| 7.52  | 5.97 | 6.13 | 6.00 | 5.89 | 5.56 | 5.40 | 5.56 | 5.30 | 5.57 | 5.71 | 5.87 |
| 7.72  | 5.35 | 5.67 | 5.28 | 5.19 | 5.03 | 5.28 | 5.13 | 5.47 | 5.13 | 5.65 | 5.75 |
| 7.92  | 5.52 | 5.91 | 5.34 | 5.10 | 5.54 | 5.52 | 5.29 | 5.36 | 5.66 | 5.82 | 6.19 |
| 8.12  | 5.35 | 5.34 | 5.30 | 5.22 | 5.20 | 5.09 | 5.18 | 5.20 | 5.09 | 5.49 | 5.80 |
| 8.32  | 5.16 | 5.03 | 5.12 | 5.19 | 5.08 | 5.39 | 5.21 | 5.15 | 5.16 | 6.06 | 5.87 |
| 8.52  | 5.84 | 5.90 | 5.94 | 5.21 | 5.60 | 5.32 | 5.48 | 5.65 | 5.59 | 6.10 | 5.79 |
| 8.72  | 5.60 | 5.70 | 5.32 | 5.45 | 5.64 | 5.10 | 4.82 | 5.65 | 5.40 | 5.84 | 6.06 |
| 8.92  | 5.77 | 5.59 | 5.45 | 5.58 | 5.24 | 5.09 | 5.20 | 5.43 | 5.29 | 5.43 | 6.15 |
| 9.12  | 5.52 | 5.66 | 5.54 | 5.47 | 5.29 | 5.43 | 5.56 | 5.46 | 5.40 | 5.49 | 6.09 |
| 9.32  | 5.05 | 5.02 | 5.14 | 4.96 | 4.98 | 4.94 | 5.05 | 5.35 | 4.90 | 5.47 | 5.52 |
| 9.52  | 5.26 | 5.25 | 5.08 | 5.07 | 5.01 | 5.06 | 5.56 | 5.42 | 5.11 | 5.77 | 5.51 |
| 9.72  | 6.13 | 6.04 | 5.88 | 5.78 | 5.56 | 5.42 | 5.11 | 5.68 | 5.25 | 5.77 | 5.78 |
| 9.92  | 5.44 | 5.68 | 5.44 | 5.12 | 5.12 | 5.25 | 5.16 | 5.31 | 5.73 | 6.03 | 5.74 |
| 10.12 | 5.60 | 5.58 | 5.68 | 5.41 | 5.43 | 5.42 | 5.24 | 5.85 | 5.67 | 5.65 | 5.80 |
| 10.32 | 5.35 | 5.49 | 5.24 | 5.22 | 5.20 | 5.39 | 4.98 | 5.24 | 5.29 | 5.50 | 5.48 |
| 10.52 | 5.20 | 4.95 | 5.36 | 5.15 | 5.13 | 5.05 | 5.02 | 5.45 | 5.34 | 5.33 | 5.58 |

|       |      |      |      |      |      |      |      |      |      |      |      |
|-------|------|------|------|------|------|------|------|------|------|------|------|
| 10.72 | 5.21 | 5.52 | 5.14 | 5.19 | 4.76 | 4.64 | 4.81 | 4.86 | 5.14 | 5.33 | 5.49 |
| 10.92 | 6.14 | 6.04 | 5.52 | 5.54 | 5.46 | 5.02 | 5.50 | 5.45 | 5.46 | 5.59 | 5.99 |
| 11.12 | 5.41 | 5.59 | 5.19 | 4.99 | 4.65 | 5.03 | 5.10 | 5.32 | 5.15 | 5.46 | 5.41 |
| 11.32 | 5.62 | 5.76 | 5.20 | 5.08 | 5.10 | 5.27 | 5.00 | 5.21 | 5.10 | 5.82 | 5.97 |
| 11.52 | 5.51 | 5.32 | 5.45 | 5.11 | 5.22 | 5.52 | 5.22 | 5.44 | 4.99 | 5.67 | 5.69 |
| 11.72 | 5.38 | 5.18 | 5.09 | 5.22 | 4.72 | 4.94 | 4.79 | 5.02 | 5.27 | 5.89 | 5.63 |
| 11.92 | 5.73 | 5.77 | 5.80 | 5.14 | 5.49 | 5.39 | 5.54 | 5.45 | 5.24 | 6.03 | 5.87 |
| 12.12 | 5.49 | 5.36 | 5.16 | 4.99 | 4.90 | 5.08 | 5.03 | 5.08 | 5.25 | 5.60 | 5.19 |
| 12.32 | 5.60 | 5.40 | 5.44 | 5.28 | 4.92 | 5.14 | 5.12 | 5.19 | 4.95 | 5.36 | 5.50 |
| 12.52 | 5.06 | 5.31 | 5.11 | 4.94 | 5.12 | 5.18 | 4.80 | 4.97 | 5.17 | 5.60 | 5.66 |
| 12.72 | 5.14 | 5.28 | 4.84 | 5.01 | 5.13 | 4.69 | 4.87 | 5.03 | 5.03 | 5.22 | 5.62 |
| 12.92 | 5.56 | 5.46 | 5.37 | 5.18 | 5.32 | 5.26 | 5.26 | 5.16 | 5.33 | 5.42 | 5.22 |
| 13.12 | 5.90 | 5.56 | 5.76 | 5.55 | 5.22 | 5.37 | 5.29 | 5.50 | 5.28 | 5.61 | 6.06 |
| 13.32 | 5.46 | 5.30 | 5.02 | 4.94 | 4.90 | 4.76 | 5.06 | 5.22 | 5.10 | 5.40 | 5.51 |
| 13.52 | 5.50 | 5.52 | 5.17 | 5.23 | 5.11 | 5.08 | 5.18 | 5.31 | 5.33 | 5.49 | 5.16 |
| 13.72 | 5.20 | 5.28 | 5.37 | 5.10 | 4.87 | 5.12 | 5.25 | 5.34 | 5.11 | 5.44 | 5.83 |
| 13.92 | 4.92 | 5.33 | 5.02 | 4.83 | 4.84 | 5.15 | 4.99 | 5.65 | 5.24 | 5.47 | 5.60 |
| 14    | 5.79 | 5.49 | 5.52 | 5.28 | 5.37 | 5.02 | 5.45 | 5.37 | 5.05 | 5.64 | 5.69 |
| 14.08 | 5.70 | 5.64 | 5.47 | 5.39 | 4.92 | 5.15 | 5.31 | 5.32 | 5.12 | 5.59 | 6.10 |
| 14.17 | 5.46 | 5.37 | 5.10 | 5.30 | 5.10 | 4.82 | 4.66 | 5.35 | 4.99 | 5.87 | 5.27 |
| 14.27 | 5.67 | 5.87 | 5.56 | 5.33 | 5.54 | 5.12 | 5.21 | 5.14 | 5.37 | 5.83 | 5.68 |
| 14.38 | 5.05 | 5.12 | 4.77 | 4.75 | 4.82 | 5.09 | 4.89 | 5.08 | 4.67 | 4.87 | 5.54 |
| 14.49 | 5.54 | 5.17 | 5.36 | 5.05 | 5.11 | 5.15 | 5.09 | 5.08 | 5.00 | 5.38 | 5.67 |
| 14.61 | 5.97 | 5.97 | 5.73 | 5.81 | 5.46 | 5.30 | 5.18 | 5.54 | 5.33 | 5.85 | 5.83 |
| 14.75 | 5.50 | 5.64 | 5.43 | 5.23 | 4.96 | 4.95 | 5.09 | 5.03 | 5.28 | 5.32 | 5.66 |
| 14.89 | 5.54 | 5.68 | 5.51 | 5.28 | 5.50 | 5.13 | 5.30 | 5.42 | 5.48 | 5.42 | 5.78 |
| 15.05 | 5.26 | 5.17 | 5.49 | 5.00 | 5.26 | 5.23 | 5.12 | 5.36 | 5.24 | 5.51 | 5.85 |
| 15.21 | 5.18 | 5.11 | 4.89 | 4.79 | 4.76 | 4.78 | 4.84 | 4.98 | 5.08 | 5.62 | 5.72 |
| 15.39 | 5.63 | 5.62 | 5.56 | 5.34 | 5.31 | 5.09 | 5.32 | 5.16 | 4.91 | 5.43 | 5.58 |
| 15.59 | 5.55 | 5.79 | 5.41 | 5.09 | 5.36 | 5.35 | 5.22 | 4.92 | 4.91 | 5.59 | 5.32 |
| 15.8  | 5.32 | 5.31 | 5.16 | 4.66 | 4.70 | 4.81 | 4.77 | 4.77 | 4.94 | 5.23 | 5.45 |
| 16.02 | 5.55 | 5.44 | 5.49 | 5.47 | 5.30 | 5.35 | 4.96 | 4.92 | 5.46 | 5.60 | 5.52 |
| 16.27 | 5.18 | 5.07 | 4.88 | 4.83 | 4.98 | 5.05 | 4.60 | 5.33 | 4.94 | 5.52 | 5.71 |
| 16.53 | 5.24 | 5.25 | 5.24 | 5.07 | 4.79 | 4.78 | 5.07 | 4.93 | 5.02 | 5.24 | 5.44 |
| 16.81 | 5.75 | 5.73 | 5.34 | 5.39 | 5.11 | 5.33 | 4.70 | 5.27 | 4.89 | 5.22 | 5.26 |
| 17.12 | 5.43 | 5.37 | 5.19 | 5.05 | 5.06 | 5.02 | 4.95 | 5.39 | 5.00 | 5.15 | 5.49 |
| 17.45 | 5.53 | 5.54 | 5.47 | 5.55 | 5.29 | 5.24 | 5.19 | 5.21 | 5.10 | 5.60 | 5.93 |
| 17.81 | 5.32 | 5.25 | 4.96 | 5.29 | 4.92 | 4.76 | 4.68 | 5.00 | 4.85 | 5.16 | 5.50 |
| 18.19 | 4.99 | 4.95 | 4.74 | 4.57 | 4.74 | 4.61 | 4.65 | 4.81 | 4.61 | 4.95 | 5.02 |
| 18.6  | 5.66 | 5.51 | 5.39 | 5.14 | 4.93 | 4.88 | 4.68 | 5.28 | 4.84 | 5.36 | 5.01 |
| 19.05 | 5.74 | 5.43 | 5.23 | 5.40 | 5.15 | 4.69 | 4.84 | 5.29 | 4.71 | 5.32 | 5.28 |
| 19.53 | 5.53 | 5.49 | 5.05 | 5.05 | 4.98 | 5.41 | 4.70 | 5.36 | 5.21 | 5.51 | 5.57 |
| 20.05 | 5.75 | 5.39 | 5.25 | 5.08 | 4.84 | 5.12 | 5.22 | 5.20 | 5.27 | 5.19 | 5.27 |
| 20.61 | 5.04 | 5.12 | 5.16 | 5.00 | 4.71 | 5.05 | 4.84 | 5.26 | 4.87 | 5.43 | 5.31 |
| 21.22 | 5.30 | 5.16 | 4.89 | 4.69 | 4.54 | 4.60 | 4.71 | 4.79 | 5.15 | 4.98 | 5.25 |
| 21.87 | 5.99 | 5.90 | 5.22 | 5.31 | 5.49 | 4.96 | 5.29 | 5.09 | 4.96 | 5.42 | 5.41 |
| 22.57 | 5.55 | 5.51 | 5.26 | 5.14 | 5.16 | 4.92 | 4.96 | 4.64 | 4.99 | 5.03 | 5.62 |
| 23.33 | 5.07 | 5.19 | 5.12 | 4.90 | 4.72 | 4.87 | 4.55 | 5.12 | 4.94 | 5.12 | 5.47 |
| 24.15 | 5.48 | 5.13 | 5.13 | 4.87 | 4.69 | 4.84 | 4.74 | 5.38 | 4.83 | 5.28 | 5.33 |
| 25.03 | 4.96 | 4.93 | 4.80 | 4.83 | 4.82 | 4.69 | 4.20 | 4.93 | 4.89 | 4.97 | 5.34 |

|        |      |      |      |      |      |      |      |      |      |      |      |
|--------|------|------|------|------|------|------|------|------|------|------|------|
| 25.98  | 5.36 | 5.42 | 5.35 | 4.94 | 4.85 | 5.01 | 4.82 | 4.79 | 4.70 | 5.10 | 5.45 |
| 27.01  | 5.87 | 5.70 | 5.39 | 5.20 | 4.82 | 4.97 | 5.26 | 4.57 | 4.81 | 5.40 | 5.07 |
| 28.11  | 4.94 | 5.19 | 4.83 | 4.62 | 4.76 | 4.61 | 4.62 | 5.24 | 4.75 | 5.22 | 5.46 |
| 29.3   | 5.21 | 5.35 | 5.12 | 5.18 | 4.81 | 4.78 | 4.72 | 4.90 | 5.22 | 5.19 | 5.20 |
| 30.59  | 5.23 | 5.11 | 4.97 | 5.05 | 4.93 | 4.81 | 4.70 | 4.46 | 4.75 | 5.03 | 4.99 |
| 31.98  | 5.15 | 4.90 | 5.13 | 4.73 | 4.63 | 4.52 | 4.73 | 4.79 | 4.67 | 5.03 | 5.33 |
| 33.47  | 5.39 | 5.35 | 5.15 | 5.07 | 4.80 | 4.99 | 4.50 | 4.85 | 5.05 | 5.08 | 5.30 |
| 35.09  | 5.36 | 5.12 | 4.96 | 4.54 | 4.95 | 5.14 | 4.41 | 5.20 | 4.78 | 5.08 | 5.24 |
| 36.83  | 5.33 | 5.39 | 5.09 | 4.76 | 4.78 | 4.88 | 5.04 | 5.06 | 5.07 | 5.09 | 5.06 |
| 38.71  | 5.23 | 5.15 | 5.10 | 4.80 | 4.77 | 4.94 | 4.77 | 4.84 | 5.13 | 5.34 | 4.96 |
| 40.73  | 4.80 | 4.83 | 4.93 | 4.52 | 4.87 | 4.95 | 4.71 | 4.77 | 4.48 | 5.19 | 5.33 |
| 42.92  | 5.03 | 5.11 | 5.14 | 4.60 | 4.40 | 4.96 | 4.97 | 5.03 | 4.90 | 5.20 | 5.12 |
| 45.27  | 5.75 | 5.55 | 5.47 | 5.21 | 4.87 | 4.99 | 4.99 | 4.77 | 4.76 | 5.26 | 5.12 |
| 47.81  | 4.92 | 5.34 | 4.79 | 4.65 | 4.59 | 4.79 | 4.89 | 4.63 | 4.55 | 5.05 | 5.08 |
| 50.55  | 5.28 | 5.29 | 5.12 | 4.71 | 4.72 | 4.68 | 5.02 | 4.83 | 4.83 | 5.03 | 5.24 |
| 53.51  | 4.74 | 4.75 | 4.57 | 4.62 | 4.45 | 3.99 | 3.98 | 4.48 | 4.14 | 4.45 | 4.45 |
| 56.69  | 4.83 | 4.57 | 4.67 | 4.30 | 4.46 | 4.57 | 4.54 | 4.51 | 3.98 | 4.84 | 4.87 |
| 60.13  | 5.35 | 5.29 | 5.28 | 5.27 | 4.94 | 4.86 | 4.87 | 4.60 | 4.95 | 5.11 | 4.79 |
| 63.84  | 5.31 | 4.99 | 5.02 | 4.53 | 4.69 | 4.63 | 4.46 | 4.97 | 4.78 | 4.66 | 4.71 |
| 67.83  | 4.96 | 4.92 | 4.97 | 4.57 | 4.51 | 4.36 | 4.30 | 4.53 | 4.76 | 4.86 | 4.81 |
| 72.15  | 5.31 | 5.13 | 5.05 | 4.80 | 4.95 | 4.95 | 4.39 | 4.95 | 4.68 | 4.60 | 4.94 |
| 76.8   | 4.82 | 4.57 | 4.53 | 4.62 | 4.49 | 4.60 | 4.48 | 4.41 | 4.24 | 4.73 | 4.55 |
| 81.81  | 4.92 | 4.96 | 4.89 | 4.60 | 4.60 | 4.39 | 4.41 | 4.65 | 4.56 | 4.62 | 5.08 |
| 87.22  | 5.15 | 5.30 | 5.24 | 5.08 | 4.94 | 4.49 | 4.64 | 4.91 | 4.61 | 4.96 | 5.18 |
| 93.06  | 4.77 | 4.84 | 5.05 | 4.69 | 4.27 | 4.44 | 4.45 | 4.81 | 5.01 | 4.76 | 4.88 |
| 99.35  | 5.16 | 4.80 | 4.92 | 4.75 | 4.69 | 4.93 | 4.55 | 4.75 | 4.64 | 5.21 | 5.02 |
| 106.13 | 4.98 | 4.85 | 4.58 | 4.76 | 4.33 | 4.64 | 4.42 | 4.41 | 4.35 | 4.61 | 5.13 |
| 113.45 | 4.63 | 4.79 | 4.88 | 4.71 | 4.17 | 4.69 | 4.37 | 4.40 | 4.63 | 4.56 | 4.83 |
| 121.34 | 5.16 | 5.04 | 4.79 | 4.62 | 4.29 | 4.72 | 4.71 | 4.81 | 4.69 | 4.48 | 5.04 |
| 129.86 | 5.08 | 4.87 | 4.55 | 4.14 | 4.36 | 4.33 | 4.28 | 4.86 | 4.11 | 4.43 | 4.67 |
| 139.04 | 4.94 | 4.62 | 4.57 | 4.39 | 4.15 | 4.39 | 4.27 | 4.38 | 4.55 | 4.66 | 4.73 |
| 148.94 | 5.05 | 5.11 | 4.68 | 4.67 | 4.76 | 4.47 | 4.47 | 4.47 | 4.50 | 4.65 | 4.97 |
| 159.62 | 4.65 | 4.79 | 4.64 | 4.45 | 4.47 | 4.46 | 4.29 | 4.44 | 4.65 | 4.50 | 4.80 |
| 171.14 | 4.39 | 4.52 | 4.36 | 4.24 | 4.08 | 4.38 | 3.82 | 3.98 | 4.04 | 4.34 | 4.56 |
| 183.56 | 4.84 | 5.19 | 4.91 | 4.50 | 4.53 | 4.26 | 4.57 | 4.61 | 4.18 | 4.74 | 4.52 |
| 196.96 | 4.63 | 4.60 | 4.48 | 4.13 | 4.15 | 4.42 | 4.33 | 4.30 | 4.25 | 4.47 | 4.68 |
| 211.41 | 4.82 | 4.92 | 4.68 | 4.53 | 4.17 | 4.52 | 4.14 | 4.66 | 4.36 | 4.34 | 4.77 |
| 226.99 | 4.64 | 4.79 | 4.68 | 4.48 | 4.42 | 4.34 | 4.29 | 4.42 | 4.53 | 4.68 | 4.79 |
| 243.8  | 4.37 | 4.63 | 4.27 | 4.14 | 4.05 | 4.16 | 4.28 | 4.25 | 4.10 | 4.35 | 4.37 |
| 261.93 | 4.58 | 4.62 | 4.46 | 4.08 | 3.99 | 4.31 | 4.07 | 4.04 | 4.23 | 4.03 | 4.29 |
| 281.48 | 4.67 | 4.79 | 4.65 | 4.50 | 4.40 | 4.37 | 4.19 | 4.44 | 4.30 | 4.73 | 4.54 |
| 302.56 | 4.25 | 4.38 | 4.11 | 4.18 | 4.10 | 3.64 | 3.71 | 3.77 | 4.11 | 4.14 | 4.04 |
| 325.3  | 4.64 | 4.78 | 4.37 | 4.56 | 4.15 | 4.18 | 4.18 | 4.15 | 4.38 | 4.42 | 4.43 |
| 349.83 | 4.35 | 4.48 | 4.20 | 4.27 | 3.79 | 4.19 | 3.94 | 4.09 | 4.19 | 4.15 | 4.33 |
| 376.28 | 4.30 | 4.13 | 4.10 | 4.17 | 3.72 | 3.60 | 3.88 | 3.71 | 3.74 | 4.04 | 4.19 |
| 404.81 | 4.96 | 4.91 | 4.61 | 4.42 | 4.36 | 4.04 | 4.15 | 4.28 | 3.87 | 4.34 | 4.12 |
| 435.58 | 4.49 | 4.54 | 4.34 | 4.13 | 3.91 | 4.01 | 3.72 | 3.86 | 3.83 | 4.09 | 3.93 |
| 468.76 | 4.18 | 4.01 | 4.18 | 4.12 | 4.22 | 3.74 | 3.71 | 3.88 | 3.62 | 3.78 | 3.92 |
| 504.55 | 4.29 | 4.20 | 4.22 | 4.05 | 4.09 | 3.80 | 4.08 | 3.79 | 3.46 | 3.88 | 4.15 |
| 543.15 | 4.03 | 3.99 | 3.76 | 3.81 | 3.36 | 3.41 | 3.43 | 3.59 | 3.55 | 3.89 | 3.74 |

|         |      |      |      |      |      |      |      |      |      |      |      |
|---------|------|------|------|------|------|------|------|------|------|------|------|
| 584.78  | 4.38 | 4.32 | 4.06 | 3.81 | 3.72 | 3.84 | 3.50 | 3.79 | 3.61 | 3.74 | 3.91 |
| 629.68  | 4.62 | 4.49 | 4.29 | 3.87 | 3.74 | 3.92 | 3.54 | 3.92 | 3.41 | 3.55 | 4.20 |
| 678.1   | 4.27 | 4.16 | 3.65 | 3.58 | 3.52 | 3.44 | 3.61 | 3.84 | 3.61 | 3.85 | 3.87 |
| 730.33  | 4.19 | 3.98 | 3.99 | 3.79 | 4.04 | 3.88 | 4.07 | 3.55 | 3.35 | 3.94 | 3.93 |
| 786.65  | 4.56 | 4.44 | 4.05 | 4.03 | 3.66 | 3.52 | 3.39 | 3.69 | 3.63 | 3.50 | 4.05 |
| 847.4   | 4.01 | 4.07 | 3.71 | 3.53 | 3.78 | 3.51 | 3.38 | 3.40 | 3.50 | 3.65 | 3.68 |
| 912.92  | 4.40 | 4.27 | 4.02 | 3.95 | 4.02 | 3.69 | 3.45 | 3.71 | 3.83 | 3.58 | 3.71 |
| 983.58  | 3.97 | 4.14 | 3.85 | 3.94 | 3.43 | 3.51 | 3.51 | 3.35 | 3.44 | 3.53 | 3.77 |
| 1059.78 | 4.10 | 4.01 | 3.83 | 3.49 | 3.74 | 3.72 | 3.72 | 3.76 | 3.54 | 3.84 | 4.02 |
| 1141.98 | 4.33 | 4.11 | 3.90 | 3.63 | 3.62 | 3.81 | 3.56 | 3.59 | 3.46 | 3.82 | 3.73 |
| 1230.62 | 3.57 | 3.46 | 3.67 | 3.45 | 3.35 | 3.19 | 3.48 | 3.78 | 2.91 | 3.64 | 3.48 |
| 1326.23 | 4.24 | 3.97 | 3.84 | 3.67 | 3.62 | 3.54 | 3.34 | 3.58 | 3.57 | 3.49 | 3.74 |
| 1429.34 | 4.29 | 4.20 | 4.14 | 3.70 | 3.91 | 3.52 | 3.34 | 3.62 | 3.78 | 3.57 | 4.08 |
| 1540.54 | 3.95 | 3.88 | 3.64 | 3.55 | 3.68 | 3.39 | 3.31 | 3.21 | 3.00 | 3.52 | 3.47 |
| 1660.48 | 3.91 | 4.07 | 3.80 | 3.78 | 3.51 | 3.89 | 3.68 | 3.86 | 3.72 | 3.27 | 3.56 |
| 1789.83 | 4.02 | 4.16 | 3.94 | 3.62 | 3.67 | 3.61 | 3.46 | 3.43 | 3.30 | 3.15 | 3.60 |
| 1929.34 | 4.07 | 4.00 | 3.99 | 3.36 | 3.70 | 3.26 | 3.34 | 3.47 | 3.42 | 3.66 | 3.56 |
| 2079.8  | 4.18 | 4.00 | 3.98 | 3.44 | 3.64 | 3.49 | 3.20 | 3.52 | 3.27 | 3.35 | 3.66 |
| 2242.08 | 4.25 | 3.97 | 3.73 | 3.55 | 3.46 | 3.44 | 3.21 | 3.64 | 3.21 | 3.69 | 3.70 |
| 2417.1  | 3.93 | 3.59 | 3.64 | 3.34 | 3.24 | 3.36 | 3.34 | 3.43 | 3.57 | 3.46 | 3.48 |
| 2605.85 | 4.03 | 4.01 | 3.54 | 3.26 | 3.64 | 3.54 | 2.95 | 3.39 | 3.30 | 3.67 | 3.43 |
| 2809.43 | 3.80 | 3.57 | 3.53 | 3.35 | 3.48 | 3.11 | 3.19 | 3.08 | 3.04 | 3.54 | 3.47 |
| 3028.99 | 4.00 | 4.05 | 3.62 | 3.57 | 3.48 | 3.22 | 3.02 | 3.42 | 2.97 | 3.46 | 3.65 |
| 3265.79 | 4.05 | 3.93 | 3.75 | 3.68 | 3.13 | 3.44 | 3.22 | 3.18 | 3.31 | 3.63 | 3.56 |
| 3521.18 | 3.74 | 3.90 | 3.44 | 3.28 | 3.27 | 3.41 | 3.29 | 3.26 | 3.28 | 3.27 | 3.52 |
| 3796.62 | 3.83 | 3.85 | 3.68 | 3.50 | 3.56 | 3.29 | 3.47 | 3.36 | 3.10 | 3.58 | 3.60 |

| Wavelength (nm) \ Time (ps) | 413.67 | 415.08 | 416.49 | 417.89 | 419.30 | 420.71 | 422.12 | 423.53 | 424.94 | 426.35 | 427.75 |
|-----------------------------|--------|--------|--------|--------|--------|--------|--------|--------|--------|--------|--------|
| -3.28                       | -0.12  | 0.06   | 0.00   | 0.02   | 0.05   | -0.07  | 0.13   | 0.13   | 0.17   | -0.01  | -0.05  |
| -2.78                       | 0.10   | -0.09  | 0.14   | -0.12  | -0.01  | 0.08   | 0.28   | 0.14   | 0.04   | 0.01   | 0.05   |
| -2.28                       | 0.13   | 0.12   | 0.12   | -0.03  | 0.05   | 0.04   | -0.10  | 0.04   | 0.15   | -0.01  | 0.13   |
| -1.78                       | -0.22  | 0.05   | -0.26  | -0.02  | -0.01  | 0.07   | -0.12  | -0.15  | -0.15  | -0.14  | -0.02  |
| -1.28                       | -0.05  | -0.18  | 0.02   | -0.07  | -0.19  | -0.10  | -0.17  | -0.31  | -0.35  | -0.04  | -0.06  |
| -0.78                       | 0.18   | 0.04   | 0.21   | 0.06   | 0.28   | 0.15   | 0.05   | 0.08   | 0.26   | 0.26   | 0.15   |
| -0.28                       | 0.11   | 0.03   | -0.23  | -0.03  | -0.11  | -0.15  | -0.06  | -0.05  | -0.02  | -0.22  | -0.18  |
| 0.22                        | -0.14  | -0.02  | 0.01   | 0.17   | -0.06  | -0.02  | -0.02  | 0.12   | -0.10  | 0.15   | -0.02  |
| 0.32                        | 0.44   | 0.22   | 0.34   | 0.18   | -0.06  | 0.24   | 0.15   | 0.16   | 0.20   | 0.12   | 0.21   |
| 0.42                        | 0.33   | 0.24   | -0.06  | -0.02  | 0.02   | 0.11   | 0.04   | 0.14   | 0.13   | 0.18   | -0.04  |
| 0.52                        | 0.03   | 0.07   | 0.08   | -0.13  | 0.00   | -0.12  | -0.35  | -0.05  | -0.04  | -0.05  | 0.00   |
| 0.62                        | -0.08  | 0.10   | 0.07   | -0.04  | -0.06  | 0.08   | 0.00   | 0.05   | 0.32   | 0.11   | 0.26   |
| 0.72                        | -0.12  | -0.23  | -0.15  | -0.16  | -0.02  | -0.08  | -0.13  | -0.20  | 0.10   | 0.00   | -0.06  |
| 0.77                        | 0.07   | 0.23   | 0.40   | 0.11   | 0.29   | 0.14   | 0.24   | 0.18   | 0.27   | 0.27   | 0.33   |
| 0.82                        | 0.09   | 0.31   | -0.24  | -0.04  | -0.18  | -0.17  | -0.09  | -0.11  | 0.06   | 0.01   | 0.12   |
| 0.87                        | 0.13   | 0.10   | 0.14   | 0.02   | 0.01   | -0.05  | 0.12   | 0.25   | 0.08   | 0.17   | 0.03   |
| 0.92                        | 0.13   | 0.00   | 0.11   | -0.04  | -0.13  | -0.02  | 0.04   | 0.13   | 0.08   | 0.04   | -0.09  |
| 0.97                        | -0.11  | -0.14  | -0.13  | -0.26  | -0.09  | -0.02  | -0.27  | -0.21  | 0.00   | -0.30  | -0.22  |
| 1.02                        | 0.31   | 0.40   | 0.21   | 0.00   | -0.09  | 0.19   | 0.09   | -0.17  | 0.16   | -0.03  | 0.05   |

|      |       |       |       |       |       |       |       |       |       |       |       |
|------|-------|-------|-------|-------|-------|-------|-------|-------|-------|-------|-------|
| 1.07 | 1.45  | 1.38  | 1.19  | 0.69  | 0.14  | -0.12 | -0.40 | -0.33 | -0.15 | -0.22 | -0.01 |
| 1.12 | 8.51  | 8.15  | 7.88  | 6.78  | 5.63  | 4.33  | 2.85  | 1.70  | 0.74  | 0.44  | 0.18  |
| 1.17 | 10.88 | 11.20 | 11.33 | 11.94 | 12.10 | 12.43 | 12.21 | 11.81 | 11.45 | 11.03 | 9.95  |
| 1.22 | 11.53 | 11.75 | 12.00 | 12.58 | 12.67 | 13.09 | 13.06 | 12.89 | 13.07 | 12.67 | 12.45 |
| 1.27 | 10.64 | 11.18 | 11.37 | 11.63 | 11.85 | 12.29 | 12.51 | 12.70 | 12.75 | 12.58 | 12.82 |
| 1.32 | 10.88 | 11.11 | 11.75 | 11.89 | 11.99 | 12.22 | 12.35 | 12.32 | 12.43 | 12.41 | 12.53 |
| 1.37 | 10.35 | 10.81 | 10.95 | 11.18 | 11.16 | 11.30 | 11.46 | 11.21 | 11.39 | 11.66 | 11.39 |
| 1.42 | 9.15  | 9.87  | 10.06 | 10.38 | 10.23 | 10.52 | 10.42 | 10.31 | 10.75 | 10.50 | 10.50 |
| 1.47 | 9.26  | 9.54  | 9.79  | 9.90  | 10.11 | 10.11 | 10.12 | 10.01 | 10.07 | 10.29 | 10.04 |
| 1.52 | 8.56  | 9.30  | 9.58  | 9.85  | 9.65  | 9.78  | 9.67  | 9.49  | 9.62  | 9.70  | 9.30  |
| 1.57 | 9.23  | 9.25  | 9.57  | 9.56  | 9.41  | 9.53  | 9.49  | 9.31  | 9.50  | 9.46  | 9.46  |
| 1.62 | 8.97  | 9.28  | 9.34  | 9.57  | 9.66  | 9.70  | 9.40  | 9.43  | 9.46  | 9.44  | 9.25  |
| 1.67 | 8.15  | 8.37  | 8.65  | 8.64  | 8.67  | 8.74  | 8.61  | 8.65  | 8.82  | 8.55  | 8.50  |
| 1.72 | 7.98  | 7.92  | 8.12  | 8.35  | 8.18  | 8.21  | 8.14  | 8.25  | 8.21  | 8.13  | 7.82  |
| 1.77 | 7.86  | 8.00  | 8.02  | 8.11  | 8.00  | 7.99  | 7.98  | 8.00  | 7.97  | 8.02  | 8.04  |
| 1.82 | 7.68  | 8.02  | 8.45  | 8.55  | 8.31  | 8.36  | 8.16  | 8.33  | 8.31  | 8.23  | 8.27  |
| 1.87 | 7.68  | 7.75  | 8.29  | 8.13  | 8.20  | 8.23  | 8.10  | 7.93  | 7.98  | 7.77  | 8.02  |
| 1.92 | 7.90  | 8.06  | 7.95  | 8.23  | 8.11  | 8.36  | 8.19  | 8.06  | 8.33  | 8.04  | 8.06  |
| 1.97 | 7.25  | 7.74  | 7.84  | 7.86  | 7.68  | 8.06  | 7.86  | 7.64  | 7.79  | 7.63  | 7.59  |
| 2.02 | 7.50  | 7.55  | 7.55  | 7.60  | 7.60  | 7.61  | 7.49  | 7.32  | 7.85  | 7.49  | 7.37  |
| 2.07 | 7.42  | 7.76  | 7.68  | 7.91  | 7.63  | 8.02  | 7.77  | 7.71  | 7.82  | 7.73  | 7.56  |
| 2.12 | 7.10  | 7.08  | 7.46  | 7.52  | 7.62  | 7.65  | 7.63  | 7.48  | 7.50  | 7.35  | 7.40  |
| 2.17 | 7.76  | 7.41  | 7.79  | 8.06  | 8.01  | 7.90  | 7.90  | 7.80  | 7.77  | 7.69  | 7.52  |
| 2.22 | 6.85  | 7.12  | 7.32  | 7.70  | 7.25  | 7.25  | 7.50  | 7.32  | 7.19  | 7.19  | 7.17  |
| 2.27 | 7.62  | 7.63  | 7.84  | 7.94  | 7.96  | 7.88  | 7.79  | 7.63  | 7.67  | 7.63  | 7.55  |
| 2.32 | 7.01  | 7.11  | 7.59  | 7.46  | 7.45  | 7.44  | 7.26  | 7.35  | 7.27  | 7.10  | 7.15  |
| 2.37 | 7.08  | 7.01  | 7.37  | 7.48  | 7.45  | 7.63  | 7.52  | 7.27  | 7.39  | 7.18  | 7.35  |
| 2.42 | 7.17  | 7.23  | 7.46  | 7.61  | 7.39  | 7.49  | 7.54  | 7.32  | 7.40  | 7.40  | 7.37  |
| 2.47 | 7.22  | 7.14  | 7.58  | 7.42  | 7.37  | 7.45  | 7.59  | 7.43  | 7.28  | 7.34  | 7.02  |
| 2.52 | 6.76  | 7.11  | 7.21  | 7.01  | 6.91  | 7.08  | 7.06  | 6.75  | 7.15  | 6.79  | 6.85  |
| 2.57 | 6.72  | 6.82  | 7.06  | 7.14  | 6.88  | 7.03  | 7.00  | 6.86  | 6.95  | 6.84  | 6.83  |
| 2.62 | 6.84  | 6.88  | 7.12  | 7.19  | 7.09  | 7.18  | 7.17  | 6.89  | 7.14  | 6.85  | 6.97  |
| 2.67 | 6.86  | 7.01  | 7.21  | 7.31  | 6.98  | 7.17  | 6.94  | 6.92  | 6.99  | 6.85  | 6.94  |
| 2.72 | 6.87  | 7.13  | 7.14  | 7.16  | 7.29  | 7.49  | 7.22  | 7.08  | 6.98  | 7.04  | 6.93  |
| 2.77 | 6.61  | 6.83  | 7.05  | 7.22  | 6.98  | 7.15  | 6.90  | 6.77  | 6.68  | 6.66  | 6.73  |
| 2.82 | 6.92  | 7.03  | 7.31  | 7.37  | 7.30  | 7.25  | 7.10  | 7.07  | 7.11  | 6.99  | 6.98  |
| 2.87 | 6.50  | 6.67  | 7.01  | 7.00  | 7.04  | 7.02  | 6.89  | 6.88  | 6.83  | 6.83  | 6.75  |
| 2.92 | 7.17  | 6.82  | 7.27  | 7.11  | 7.31  | 7.07  | 7.01  | 6.96  | 7.12  | 7.10  | 7.04  |
| 2.97 | 6.61  | 6.72  | 7.21  | 6.95  | 6.95  | 7.20  | 6.91  | 6.93  | 6.84  | 6.87  | 6.90  |
| 3.02 | 6.77  | 7.04  | 7.12  | 7.20  | 7.21  | 7.29  | 7.02  | 7.25  | 7.31  | 6.88  | 6.75  |
| 3.07 | 6.23  | 6.81  | 6.69  | 6.91  | 6.88  | 6.70  | 6.91  | 6.64  | 6.71  | 6.60  | 6.51  |
| 3.12 | 6.96  | 7.18  | 7.42  | 7.40  | 7.27  | 7.49  | 7.31  | 7.15  | 7.07  | 6.99  | 6.91  |
| 3.17 | 6.50  | 6.57  | 6.96  | 6.82  | 6.87  | 6.90  | 6.80  | 6.48  | 6.88  | 6.62  | 6.15  |
| 3.22 | 6.94  | 7.09  | 7.28  | 7.29  | 7.15  | 7.27  | 7.19  | 7.04  | 6.99  | 7.10  | 6.88  |
| 3.27 | 6.61  | 7.30  | 7.17  | 7.30  | 7.17  | 7.13  | 7.00  | 7.07  | 6.93  | 7.08  | 7.00  |
| 3.32 | 7.03  | 7.52  | 6.97  | 7.33  | 7.31  | 7.28  | 7.22  | 7.24  | 7.20  | 7.21  | 6.94  |
| 3.37 | 6.79  | 7.07  | 7.02  | 7.18  | 7.19  | 7.13  | 7.05  | 6.89  | 7.05  | 6.97  | 6.80  |
| 3.42 | 6.63  | 6.78  | 6.79  | 6.66  | 6.76  | 6.64  | 6.91  | 6.67  | 6.52  | 6.52  | 6.54  |
| 3.47 | 6.75  | 6.81  | 6.88  | 6.99  | 7.01  | 7.13  | 6.99  | 6.86  | 6.89  | 6.86  | 6.67  |
| 3.52 | 6.58  | 7.04  | 7.30  | 7.05  | 6.97  | 7.31  | 7.06  | 6.89  | 6.91  | 6.71  | 6.64  |



|       |      |      |      |      |      |      |      |      |      |      |      |
|-------|------|------|------|------|------|------|------|------|------|------|------|
| 3.57  | 6.79 | 7.18 | 7.18 | 7.27 | 7.14 | 7.37 | 6.98 | 7.04 | 6.89 | 6.75 | 6.69 |
| 3.62  | 6.52 | 6.65 | 6.88 | 6.65 | 6.60 | 6.78 | 6.62 | 6.59 | 6.75 | 6.63 | 6.47 |
| 3.67  | 6.30 | 6.61 | 6.86 | 6.89 | 6.71 | 6.90 | 6.65 | 6.64 | 6.89 | 6.75 | 6.42 |
| 3.72  | 6.81 | 6.83 | 6.96 | 6.84 | 6.91 | 7.10 | 7.11 | 6.95 | 7.03 | 6.84 | 6.89 |
| 3.92  | 6.16 | 6.60 | 6.60 | 6.50 | 6.55 | 6.63 | 6.58 | 6.57 | 6.53 | 6.33 | 6.17 |
| 4.12  | 6.73 | 6.99 | 6.78 | 6.94 | 6.89 | 7.21 | 6.88 | 6.94 | 6.55 | 6.75 | 6.41 |
| 4.32  | 6.45 | 6.62 | 7.22 | 6.93 | 7.02 | 7.33 | 6.93 | 7.01 | 6.97 | 6.94 | 6.94 |
| 4.52  | 6.68 | 6.63 | 6.93 | 6.95 | 7.02 | 7.08 | 6.95 | 6.94 | 7.17 | 6.93 | 6.73 |
| 4.72  | 6.29 | 6.40 | 6.53 | 6.73 | 6.60 | 6.87 | 6.57 | 6.53 | 6.68 | 6.42 | 6.35 |
| 4.92  | 6.58 | 6.40 | 6.70 | 6.67 | 6.80 | 6.69 | 6.49 | 6.66 | 6.76 | 6.57 | 6.45 |
| 5.12  | 6.63 | 6.54 | 6.87 | 6.72 | 6.63 | 6.70 | 6.77 | 6.41 | 6.55 | 6.36 | 6.41 |
| 5.32  | 6.55 | 6.74 | 7.04 | 7.10 | 6.92 | 6.92 | 6.89 | 6.71 | 6.73 | 6.59 | 6.50 |
| 5.52  | 6.33 | 6.82 | 6.78 | 6.52 | 6.67 | 6.81 | 6.69 | 6.54 | 6.54 | 6.50 | 6.37 |
| 5.72  | 6.51 | 6.51 | 6.51 | 6.18 | 6.60 | 6.47 | 6.54 | 6.23 | 6.23 | 6.30 | 6.17 |
| 5.92  | 6.40 | 6.39 | 6.55 | 6.64 | 6.69 | 6.87 | 6.72 | 6.60 | 6.67 | 6.51 | 6.30 |
| 6.12  | 6.01 | 6.34 | 6.56 | 6.40 | 6.36 | 6.50 | 6.39 | 6.14 | 6.25 | 6.39 | 6.09 |
| 6.32  | 6.62 | 6.59 | 6.65 | 6.94 | 6.81 | 6.60 | 6.45 | 6.45 | 6.30 | 6.37 | 6.27 |
| 6.52  | 6.38 | 6.71 | 6.75 | 6.96 | 6.88 | 6.84 | 6.97 | 6.95 | 6.66 | 6.67 | 6.67 |
| 6.72  | 5.96 | 6.15 | 6.29 | 6.25 | 6.31 | 6.39 | 6.10 | 6.09 | 6.14 | 5.97 | 6.03 |
| 6.92  | 6.02 | 6.23 | 6.12 | 6.42 | 6.23 | 6.38 | 6.11 | 6.38 | 6.13 | 6.27 | 6.10 |
| 7.12  | 6.05 | 6.34 | 6.42 | 6.44 | 6.25 | 6.49 | 6.48 | 6.22 | 6.27 | 6.16 | 6.31 |
| 7.32  | 6.01 | 6.09 | 6.57 | 6.62 | 6.44 | 6.60 | 6.58 | 6.46 | 6.59 | 6.45 | 6.48 |
| 7.52  | 6.46 | 6.50 | 6.64 | 6.70 | 6.69 | 6.70 | 6.63 | 6.63 | 6.64 | 6.47 | 6.47 |
| 7.72  | 6.08 | 6.16 | 6.34 | 6.31 | 6.17 | 6.34 | 6.52 | 6.08 | 6.26 | 6.15 | 5.90 |
| 7.92  | 6.20 | 6.64 | 6.60 | 6.81 | 6.48 | 6.56 | 6.44 | 6.40 | 6.52 | 6.32 | 6.37 |
| 8.12  | 5.90 | 6.20 | 6.18 | 6.37 | 6.27 | 6.21 | 6.16 | 6.13 | 6.01 | 5.99 | 5.78 |
| 8.32  | 6.30 | 6.53 | 6.57 | 6.62 | 6.51 | 6.58 | 6.36 | 6.14 | 6.50 | 6.41 | 6.31 |
| 8.52  | 5.90 | 6.27 | 6.39 | 6.49 | 6.72 | 6.54 | 6.33 | 6.32 | 6.37 | 6.35 | 6.37 |
| 8.72  | 6.17 | 6.61 | 6.38 | 6.34 | 6.42 | 6.63 | 6.49 | 6.34 | 6.57 | 6.32 | 6.36 |
| 8.92  | 6.08 | 6.13 | 6.13 | 6.36 | 6.10 | 6.24 | 6.19 | 5.92 | 6.19 | 6.08 | 5.79 |
| 9.12  | 6.11 | 6.50 | 6.43 | 6.45 | 6.25 | 6.21 | 6.48 | 6.34 | 6.27 | 6.25 | 6.08 |
| 9.32  | 5.96 | 5.63 | 6.26 | 6.15 | 5.99 | 5.99 | 6.02 | 5.78 | 5.87 | 5.86 | 5.74 |
| 9.52  | 5.96 | 6.20 | 6.34 | 6.20 | 6.26 | 6.43 | 6.29 | 6.10 | 6.14 | 6.08 | 5.96 |
| 9.72  | 6.09 | 6.17 | 6.70 | 6.44 | 6.59 | 6.50 | 6.72 | 6.33 | 6.29 | 6.23 | 6.14 |
| 9.92  | 6.05 | 6.13 | 6.18 | 6.39 | 6.26 | 6.32 | 6.23 | 6.17 | 6.26 | 6.10 | 5.94 |
| 10.12 | 6.12 | 6.37 | 6.54 | 6.58 | 6.56 | 6.64 | 6.51 | 6.61 | 6.40 | 6.42 | 6.05 |
| 10.32 | 6.11 | 5.92 | 6.23 | 6.43 | 6.41 | 6.37 | 6.19 | 6.35 | 6.31 | 6.19 | 6.13 |
| 10.52 | 5.87 | 6.25 | 6.11 | 6.13 | 6.10 | 6.03 | 6.12 | 6.13 | 6.17 | 6.06 | 5.88 |
| 10.72 | 5.91 | 5.69 | 5.77 | 6.04 | 5.93 | 5.84 | 6.05 | 5.96 | 5.94 | 5.96 | 5.68 |
| 10.92 | 6.07 | 6.36 | 6.33 | 6.53 | 6.53 | 6.51 | 6.35 | 6.36 | 6.36 | 6.34 | 6.27 |
| 11.12 | 5.88 | 6.27 | 6.38 | 6.09 | 6.11 | 6.30 | 6.35 | 6.08 | 6.28 | 6.15 | 5.99 |
| 11.32 | 6.05 | 6.28 | 6.19 | 6.38 | 6.19 | 6.30 | 6.33 | 6.20 | 6.21 | 5.83 | 6.00 |
| 11.52 | 6.26 | 6.02 | 6.21 | 6.42 | 6.32 | 6.43 | 6.42 | 6.18 | 6.36 | 6.21 | 6.26 |
| 11.72 | 5.49 | 6.17 | 6.35 | 6.22 | 6.07 | 6.10 | 6.26 | 6.08 | 6.15 | 6.04 | 5.88 |
| 11.92 | 5.97 | 6.37 | 6.44 | 6.37 | 6.50 | 6.28 | 6.47 | 6.35 | 6.25 | 6.30 | 6.30 |
| 12.12 | 5.78 | 6.24 | 6.27 | 6.17 | 6.13 | 6.02 | 6.03 | 6.11 | 6.23 | 6.20 | 5.97 |
| 12.32 | 6.04 | 6.22 | 6.03 | 6.28 | 6.26 | 6.53 | 6.50 | 6.46 | 6.34 | 6.02 | 5.92 |
| 12.52 | 5.84 | 6.01 | 6.03 | 6.20 | 6.26 | 6.14 | 6.13 | 6.10 | 6.22 | 6.03 | 5.91 |
| 12.72 | 5.51 | 6.07 | 6.08 | 6.00 | 6.26 | 6.23 | 6.12 | 6.01 | 6.12 | 5.93 | 5.87 |
| 12.92 | 6.05 | 5.72 | 5.94 | 6.05 | 6.03 | 6.22 | 6.13 | 5.87 | 6.07 | 5.90 | 5.80 |

|       |      |      |      |      |      |      |      |      |      |      |      |
|-------|------|------|------|------|------|------|------|------|------|------|------|
| 13.12 | 5.96 | 6.21 | 6.52 | 6.71 | 6.39 | 6.32 | 6.39 | 6.30 | 6.44 | 6.20 | 6.16 |
| 13.32 | 5.51 | 5.82 | 6.10 | 6.00 | 6.17 | 5.86 | 6.02 | 5.98 | 6.04 | 5.84 | 5.86 |
| 13.52 | 5.87 | 6.10 | 6.36 | 6.15 | 6.14 | 6.20 | 6.04 | 6.00 | 5.91 | 5.84 | 5.89 |
| 13.72 | 5.92 | 5.91 | 5.99 | 6.12 | 5.83 | 6.21 | 6.07 | 5.92 | 5.88 | 5.85 | 5.82 |
| 13.92 | 5.91 | 6.03 | 6.17 | 6.16 | 6.28 | 6.19 | 6.29 | 5.93 | 6.33 | 5.99 | 5.93 |
| 14    | 5.61 | 5.82 | 6.06 | 6.44 | 6.11 | 6.27 | 6.43 | 6.32 | 6.13 | 6.10 | 5.92 |
| 14.08 | 6.24 | 6.27 | 6.38 | 6.37 | 6.56 | 6.47 | 6.24 | 6.02 | 6.28 | 6.09 | 5.98 |
| 14.17 | 6.02 | 6.00 | 6.13 | 6.31 | 6.05 | 6.55 | 6.25 | 6.16 | 6.10 | 6.18 | 5.91 |
| 14.27 | 6.11 | 6.02 | 6.09 | 6.30 | 6.14 | 6.11 | 6.23 | 6.28 | 6.16 | 6.21 | 5.95 |
| 14.38 | 5.81 | 6.06 | 6.10 | 6.14 | 5.91 | 6.04 | 5.87 | 5.65 | 6.02 | 5.89 | 5.78 |
| 14.49 | 5.75 | 5.93 | 6.20 | 6.16 | 6.01 | 5.87 | 6.01 | 5.91 | 5.92 | 5.76 | 5.59 |
| 14.61 | 6.24 | 6.20 | 6.32 | 6.23 | 6.21 | 6.35 | 6.26 | 6.05 | 6.23 | 5.98 | 6.20 |
| 14.75 | 5.98 | 5.73 | 5.99 | 6.19 | 5.78 | 6.09 | 6.06 | 5.94 | 5.95 | 5.93 | 5.91 |
| 14.89 | 6.21 | 6.17 | 6.45 | 6.34 | 6.36 | 6.45 | 6.40 | 6.23 | 6.24 | 6.18 | 5.97 |
| 15.05 | 5.66 | 6.16 | 6.19 | 6.29 | 6.19 | 6.33 | 6.09 | 5.96 | 6.21 | 5.99 | 5.98 |
| 15.21 | 5.89 | 6.18 | 6.27 | 6.12 | 6.09 | 6.12 | 6.04 | 5.96 | 5.97 | 5.93 | 5.88 |
| 15.39 | 5.79 | 5.93 | 6.31 | 6.13 | 5.68 | 6.10 | 6.08 | 5.95 | 6.03 | 5.83 | 5.77 |
| 15.59 | 6.08 | 6.20 | 6.19 | 6.16 | 6.05 | 6.21 | 6.21 | 6.19 | 6.01 | 6.01 | 5.92 |
| 15.8  | 5.53 | 5.63 | 5.71 | 5.79 | 5.84 | 6.06 | 5.91 | 6.07 | 5.69 | 5.67 | 5.83 |
| 16.02 | 6.07 | 6.21 | 6.23 | 6.17 | 5.99 | 6.30 | 6.22 | 6.03 | 6.19 | 5.98 | 5.70 |
| 16.27 | 5.82 | 5.92 | 6.15 | 5.80 | 6.04 | 6.02 | 5.95 | 6.07 | 5.97 | 5.90 | 5.81 |
| 16.53 | 5.88 | 6.05 | 6.22 | 5.97 | 6.11 | 6.17 | 6.05 | 5.75 | 5.92 | 5.81 | 5.66 |
| 16.81 | 5.85 | 5.86 | 6.09 | 5.95 | 6.15 | 6.15 | 6.23 | 6.20 | 6.04 | 6.01 | 6.06 |
| 17.12 | 5.92 | 5.81 | 6.33 | 6.15 | 6.27 | 6.09 | 5.99 | 5.74 | 5.99 | 5.82 | 5.87 |
| 17.45 | 6.17 | 6.19 | 6.14 | 6.19 | 6.46 | 6.28 | 6.10 | 6.02 | 6.05 | 6.19 | 5.94 |
| 17.81 | 5.62 | 5.91 | 5.89 | 6.10 | 5.95 | 6.21 | 6.15 | 6.00 | 6.00 | 5.95 | 5.65 |
| 18.19 | 5.28 | 5.45 | 5.57 | 5.80 | 5.86 | 5.91 | 5.86 | 5.62 | 6.07 | 5.78 | 5.62 |
| 18.6  | 5.40 | 5.76 | 5.78 | 5.93 | 5.67 | 5.84 | 5.72 | 5.77 | 5.77 | 5.80 | 5.56 |
| 19.05 | 5.34 | 5.59 | 6.09 | 5.87 | 5.88 | 5.68 | 5.89 | 5.81 | 5.80 | 5.48 | 5.62 |
| 19.53 | 6.10 | 5.99 | 6.13 | 6.23 | 6.15 | 6.14 | 6.04 | 6.06 | 6.22 | 5.89 | 5.81 |
| 20.05 | 5.68 | 5.58 | 6.02 | 5.94 | 5.80 | 5.82 | 5.81 | 5.87 | 5.94 | 5.67 | 5.62 |
| 20.61 | 5.53 | 5.87 | 5.95 | 5.93 | 6.09 | 5.88 | 6.01 | 6.12 | 5.91 | 5.93 | 5.66 |
| 21.22 | 5.44 | 5.78 | 5.92 | 5.60 | 5.79 | 5.73 | 5.64 | 5.73 | 5.51 | 5.71 | 5.47 |
| 21.87 | 5.82 | 5.96 | 5.91 | 5.87 | 5.89 | 5.94 | 6.16 | 5.96 | 6.05 | 5.95 | 5.81 |
| 22.57 | 5.36 | 5.73 | 5.88 | 6.02 | 5.74 | 5.95 | 5.86 | 5.94 | 5.98 | 5.64 | 5.66 |
| 23.33 | 5.80 | 6.03 | 5.81 | 6.03 | 5.95 | 6.03 | 5.66 | 5.69 | 5.88 | 5.65 | 5.86 |
| 24.15 | 5.60 | 5.67 | 5.64 | 5.79 | 5.86 | 5.73 | 5.80 | 5.53 | 5.76 | 5.64 | 5.54 |
| 25.03 | 5.25 | 5.31 | 5.80 | 5.47 | 5.87 | 5.64 | 5.83 | 5.67 | 5.68 | 5.45 | 5.54 |
| 25.98 | 5.84 | 5.96 | 5.84 | 5.87 | 5.82 | 5.91 | 5.77 | 5.62 | 5.79 | 5.66 | 5.43 |
| 27.01 | 5.46 | 5.30 | 5.78 | 5.66 | 5.63 | 5.43 | 5.29 | 5.39 | 5.52 | 5.30 | 5.27 |
| 28.11 | 5.58 | 5.84 | 5.88 | 6.04 | 5.90 | 5.80 | 6.01 | 5.63 | 5.77 | 5.75 | 5.57 |
| 29.3  | 5.50 | 5.70 | 5.76 | 6.06 | 5.73 | 5.97 | 5.70 | 5.62 | 5.78 | 5.50 | 5.45 |
| 30.59 | 5.40 | 5.54 | 5.84 | 5.70 | 5.61 | 5.71 | 5.72 | 5.56 | 5.38 | 5.38 | 5.11 |
| 31.98 | 5.50 | 6.12 | 5.94 | 5.86 | 5.86 | 6.09 | 5.85 | 5.86 | 6.02 | 5.70 | 5.51 |
| 33.47 | 5.21 | 5.76 | 5.81 | 5.86 | 5.83 | 6.07 | 5.76 | 5.70 | 5.57 | 5.72 | 5.56 |
| 35.09 | 5.57 | 5.62 | 5.95 | 5.58 | 5.91 | 5.79 | 5.77 | 5.81 | 5.89 | 5.79 | 5.52 |
| 36.83 | 5.49 | 5.57 | 5.67 | 5.53 | 5.60 | 5.61 | 5.63 | 5.62 | 5.75 | 5.53 | 5.41 |
| 38.71 | 5.99 | 5.75 | 5.88 | 5.69 | 5.53 | 5.64 | 5.83 | 5.58 | 5.66 | 5.66 | 5.37 |
| 40.73 | 5.25 | 5.34 | 5.52 | 5.61 | 5.61 | 5.51 | 5.66 | 5.38 | 5.45 | 5.52 | 5.39 |
| 42.92 | 5.42 | 5.58 | 5.79 | 5.82 | 5.81 | 5.81 | 5.72 | 5.62 | 5.69 | 5.54 | 5.56 |

|         |      |      |      |      |      |      |      |      |      |      |      |
|---------|------|------|------|------|------|------|------|------|------|------|------|
| 45.27   | 5.47 | 5.64 | 5.63 | 5.70 | 5.78 | 5.70 | 5.87 | 5.79 | 5.75 | 5.65 | 5.80 |
| 47.81   | 5.18 | 5.41 | 5.63 | 5.58 | 5.59 | 5.53 | 5.41 | 5.47 | 5.44 | 5.57 | 5.02 |
| 50.55   | 5.40 | 5.84 | 5.83 | 5.60 | 5.50 | 5.64 | 5.63 | 5.43 | 5.74 | 5.39 | 5.17 |
| 53.51   | 4.99 | 4.63 | 5.08 | 5.07 | 4.92 | 5.17 | 4.99 | 5.15 | 5.09 | 5.09 | 4.91 |
| 56.69   | 5.16 | 5.25 | 5.25 | 5.28 | 5.10 | 5.30 | 5.26 | 5.24 | 5.19 | 5.11 | 4.86 |
| 60.13   | 5.41 | 5.35 | 5.53 | 5.46 | 5.63 | 5.41 | 5.53 | 5.30 | 5.28 | 5.24 | 5.04 |
| 63.84   | 5.19 | 5.33 | 5.55 | 5.42 | 5.50 | 5.46 | 5.49 | 5.11 | 5.25 | 5.09 | 5.12 |
| 67.83   | 5.03 | 4.95 | 5.12 | 5.10 | 5.36 | 5.38 | 5.09 | 5.26 | 5.28 | 5.09 | 4.91 |
| 72.15   | 5.13 | 5.27 | 5.13 | 5.33 | 5.21 | 5.16 | 5.16 | 5.13 | 5.47 | 5.10 | 5.04 |
| 76.8    | 4.78 | 5.07 | 5.33 | 5.03 | 4.98 | 5.10 | 5.04 | 5.06 | 5.12 | 5.01 | 4.82 |
| 81.81   | 5.32 | 5.24 | 5.48 | 5.30 | 5.37 | 5.33 | 5.39 | 5.34 | 5.29 | 5.19 | 5.05 |
| 87.22   | 5.58 | 5.66 | 5.69 | 5.79 | 5.66 | 5.50 | 5.39 | 5.46 | 5.29 | 5.16 | 4.99 |
| 93.06   | 5.22 | 5.45 | 5.63 | 5.45 | 5.52 | 5.48 | 5.34 | 5.44 | 5.41 | 5.24 | 5.19 |
| 99.35   | 5.31 | 5.45 | 5.71 | 5.40 | 5.52 | 5.58 | 5.54 | 5.32 | 5.52 | 5.19 | 5.05 |
| 106.13  | 5.04 | 4.90 | 5.10 | 5.04 | 5.21 | 5.20 | 5.22 | 4.92 | 4.97 | 5.17 | 4.87 |
| 113.45  | 5.03 | 5.25 | 5.36 | 5.35 | 5.37 | 5.36 | 5.33 | 5.29 | 5.18 | 5.31 | 5.18 |
| 121.34  | 5.28 | 5.38 | 5.43 | 5.43 | 5.06 | 5.42 | 5.26 | 5.12 | 5.09 | 5.38 | 5.13 |
| 129.86  | 4.80 | 5.06 | 5.15 | 5.11 | 5.03 | 5.02 | 4.90 | 5.01 | 5.04 | 4.99 | 4.69 |
| 139.04  | 4.87 | 4.75 | 5.10 | 5.20 | 4.82 | 5.03 | 5.01 | 4.94 | 5.00 | 4.97 | 4.83 |
| 148.94  | 4.98 | 5.18 | 5.17 | 5.26 | 5.22 | 5.12 | 5.06 | 4.99 | 5.06 | 4.92 | 5.01 |
| 159.62  | 4.57 | 5.18 | 5.35 | 5.09 | 5.05 | 5.18 | 5.03 | 4.91 | 4.89 | 4.81 | 4.84 |
| 171.14  | 4.81 | 5.06 | 5.16 | 5.10 | 5.08 | 5.17 | 5.15 | 4.96 | 5.11 | 4.76 | 4.76 |
| 183.56  | 4.66 | 4.78 | 4.90 | 4.88 | 4.74 | 4.78 | 5.17 | 4.76 | 4.85 | 4.82 | 4.58 |
| 196.96  | 4.57 | 4.97 | 5.07 | 5.01 | 4.98 | 4.97 | 5.03 | 4.86 | 5.05 | 4.92 | 4.74 |
| 211.41  | 4.80 | 4.98 | 5.02 | 5.10 | 4.93 | 4.98 | 4.81 | 4.81 | 5.05 | 4.92 | 4.70 |
| 226.99  | 4.90 | 4.95 | 5.04 | 4.91 | 4.91 | 5.19 | 5.12 | 4.99 | 5.03 | 4.81 | 4.81 |
| 243.8   | 4.60 | 4.89 | 4.85 | 5.13 | 4.80 | 4.68 | 4.52 | 4.68 | 4.76 | 4.45 | 4.53 |
| 261.93  | 4.53 | 4.65 | 4.71 | 5.02 | 4.77 | 4.96 | 4.90 | 4.75 | 5.00 | 4.66 | 4.63 |
| 281.48  | 4.77 | 5.10 | 5.29 | 5.12 | 5.13 | 5.19 | 5.03 | 5.06 | 5.16 | 5.08 | 4.88 |
| 302.56  | 4.63 | 4.63 | 4.64 | 4.63 | 4.57 | 4.85 | 4.68 | 4.48 | 4.64 | 4.65 | 4.47 |
| 325.3   | 4.35 | 4.79 | 4.74 | 4.79 | 4.94 | 4.85 | 4.94 | 4.71 | 4.67 | 4.69 | 4.45 |
| 349.83  | 4.31 | 4.30 | 4.60 | 4.55 | 4.58 | 4.50 | 4.70 | 4.44 | 4.51 | 4.36 | 4.36 |
| 376.28  | 4.52 | 4.38 | 4.72 | 4.61 | 4.35 | 4.72 | 4.57 | 4.47 | 4.63 | 4.60 | 4.32 |
| 404.81  | 4.41 | 4.66 | 4.66 | 4.81 | 4.65 | 4.82 | 4.65 | 4.58 | 5.01 | 4.71 | 4.60 |
| 435.58  | 4.24 | 4.26 | 4.35 | 4.32 | 4.47 | 4.35 | 4.48 | 4.32 | 4.41 | 4.14 | 4.12 |
| 468.76  | 4.39 | 4.55 | 4.46 | 4.86 | 4.39 | 4.48 | 4.50 | 4.51 | 4.40 | 4.65 | 4.49 |
| 504.55  | 4.37 | 4.39 | 4.66 | 4.65 | 4.54 | 4.62 | 4.61 | 4.71 | 4.57 | 4.38 | 4.50 |
| 543.15  | 4.20 | 4.33 | 4.04 | 4.33 | 4.26 | 4.33 | 4.32 | 4.33 | 4.27 | 4.10 | 4.15 |
| 584.78  | 4.34 | 4.29 | 4.26 | 4.32 | 4.54 | 4.50 | 4.70 | 4.35 | 4.48 | 4.44 | 4.30 |
| 629.68  | 4.31 | 4.32 | 4.24 | 4.41 | 4.25 | 4.49 | 4.43 | 4.40 | 4.39 | 4.11 | 4.25 |
| 678.1   | 4.14 | 4.35 | 4.62 | 4.63 | 4.41 | 4.55 | 4.66 | 4.49 | 4.39 | 4.37 | 4.21 |
| 730.33  | 4.41 | 4.16 | 4.35 | 4.33 | 4.27 | 4.24 | 4.29 | 4.26 | 4.28 | 4.06 | 4.03 |
| 786.65  | 3.93 | 3.97 | 4.12 | 4.18 | 4.15 | 4.17 | 4.16 | 3.95 | 4.20 | 3.97 | 4.05 |
| 847.4   | 3.91 | 3.93 | 3.81 | 3.93 | 3.89 | 4.01 | 4.08 | 3.83 | 3.88 | 3.81 | 3.70 |
| 912.92  | 3.84 | 3.94 | 4.22 | 4.07 | 3.95 | 3.99 | 4.23 | 4.11 | 3.98 | 4.06 | 3.73 |
| 983.58  | 4.21 | 3.73 | 4.20 | 4.09 | 3.96 | 4.23 | 4.25 | 4.03 | 4.15 | 4.03 | 3.99 |
| 1059.78 | 4.37 | 4.34 | 4.39 | 4.29 | 4.33 | 4.32 | 4.19 | 4.10 | 4.20 | 4.22 | 4.17 |
| 1141.98 | 4.06 | 4.12 | 4.25 | 4.22 | 4.16 | 4.13 | 4.14 | 4.05 | 4.31 | 3.99 | 3.84 |
| 1230.62 | 3.89 | 4.02 | 3.88 | 4.01 | 3.93 | 3.98 | 3.96 | 4.08 | 3.92 | 3.80 | 3.76 |
| 1326.23 | 3.99 | 4.00 | 4.10 | 4.31 | 3.88 | 4.16 | 4.33 | 4.16 | 4.41 | 4.10 | 4.11 |

|         |      |      |      |      |      |      |      |      |      |      |      |
|---------|------|------|------|------|------|------|------|------|------|------|------|
| 1429.34 | 3.83 | 4.11 | 4.17 | 4.07 | 4.16 | 4.13 | 4.28 | 4.06 | 3.92 | 3.93 | 3.94 |
| 1540.54 | 3.75 | 3.96 | 3.80 | 3.85 | 3.84 | 3.96 | 3.90 | 3.66 | 3.77 | 3.73 | 3.56 |
| 1660.48 | 3.69 | 3.98 | 3.87 | 3.95 | 3.98 | 3.99 | 4.06 | 3.91 | 3.79 | 3.87 | 3.77 |
| 1789.83 | 3.56 | 3.88 | 4.05 | 3.88 | 3.77 | 3.97 | 3.71 | 3.68 | 3.64 | 3.42 | 3.49 |
| 1929.34 | 3.90 | 4.08 | 4.28 | 4.16 | 4.05 | 4.32 | 4.20 | 4.02 | 4.07 | 4.13 | 3.89 |
| 2079.8  | 3.84 | 3.97 | 3.89 | 4.01 | 3.77 | 3.99 | 3.75 | 3.80 | 4.05 | 3.78 | 3.54 |
| 2242.08 | 4.09 | 4.12 | 4.09 | 4.32 | 4.13 | 4.27 | 4.11 | 3.94 | 3.87 | 3.85 | 3.78 |
| 2417.1  | 3.72 | 3.79 | 3.79 | 3.97 | 3.68 | 3.90 | 3.89 | 3.85 | 3.87 | 3.51 | 3.58 |
| 2605.85 | 3.85 | 3.97 | 4.02 | 3.86 | 3.84 | 4.07 | 3.77 | 3.61 | 3.67 | 3.61 | 3.74 |
| 2809.43 | 3.97 | 3.98 | 3.89 | 3.87 | 3.84 | 3.85 | 3.72 | 3.67 | 3.74 | 3.78 | 3.52 |
| 3028.99 | 3.71 | 3.74 | 4.06 | 4.03 | 3.74 | 3.89 | 4.00 | 3.73 | 3.99 | 3.81 | 3.81 |
| 3265.79 | 3.78 | 4.00 | 3.87 | 3.83 | 3.68 | 3.86 | 3.83 | 3.51 | 3.69 | 3.57 | 3.52 |
| 3521.18 | 3.62 | 3.89 | 3.75 | 3.85 | 3.64 | 3.65 | 3.62 | 3.58 | 3.47 | 3.48 | 3.51 |
| 3796.62 | 3.64 | 3.48 | 3.78 | 4.00 | 3.67 | 4.05 | 3.68 | 3.74 | 3.64 | 3.40 | 3.26 |

| Wavelength (nm) \ Time (ps) | 429.16 | 430.57 | 431.98 | 433.39 | 434.80 | 436.20 | 437.61 | 439.02 | 440.43 | 441.84 | 443.25 |
|-----------------------------|--------|--------|--------|--------|--------|--------|--------|--------|--------|--------|--------|
| -3.28                       | 0.11   | 0.19   | 0.02   | 0.24   | 0.02   | 0.05   | 0.31   | 0.14   | 0.21   | 0.08   | 0.07   |
| -2.78                       | 0.28   | -0.08  | 0.20   | 0.14   | 0.23   | 0.14   | 0.08   | -0.09  | -0.01  | 0.10   | 0.15   |
| -2.28                       | 0.02   | -0.06  | 0.10   | -0.16  | 0.01   | -0.30  | -0.26  | -0.07  | -0.14  | -0.06  | -0.01  |
| -1.78                       | -0.12  | -0.11  | -0.03  | -0.01  | 0.04   | 0.11   | -0.06  | 0.08   | 0.11   | 0.05   | 0.07   |
| -1.28                       | -0.25  | -0.06  | -0.17  | -0.21  | -0.26  | -0.02  | -0.31  | -0.17  | -0.15  | -0.11  | -0.25  |
| -0.78                       | 0.03   | 0.29   | 0.11   | 0.01   | 0.04   | 0.17   | 0.15   | 0.13   | 0.12   | 0.17   | 0.12   |
| -0.28                       | -0.17  | -0.12  | -0.31  | -0.02  | -0.22  | -0.18  | -0.08  | -0.07  | -0.27  | -0.27  | -0.19  |
| 0.22                        | 0.11   | -0.05  | 0.08   | 0.01   | 0.14   | 0.03   | 0.15   | 0.05   | 0.13   | 0.04   | 0.04   |
| 0.32                        | 0.13   | 0.08   | 0.11   | -0.01  | 0.16   | 0.00   | 0.15   | -0.04  | 0.09   | 0.05   | -0.20  |
| 0.42                        | 0.11   | -0.07  | -0.25  | -0.05  | 0.03   | 0.07   | -0.03  | 0.08   | -0.02  | -0.22  | -0.09  |
| 0.52                        | -0.22  | -0.08  | -0.21  | -0.25  | -0.09  | -0.16  | -0.26  | -0.25  | -0.24  | -0.18  | -0.33  |
| 0.62                        | 0.12   | 0.25   | 0.35   | 0.25   | 0.21   | 0.30   | 0.22   | 0.10   | 0.12   | 0.10   | -0.03  |
| 0.72                        | -0.24  | -0.02  | -0.23  | -0.25  | -0.23  | -0.24  | -0.16  | -0.34  | -0.48  | -0.28  | -0.22  |
| 0.77                        | 0.22   | 0.36   | 0.13   | 0.30   | 0.22   | 0.05   | 0.10   | 0.06   | 0.06   | 0.19   | -0.01  |
| 0.82                        | -0.07  | 0.11   | -0.01  | 0.06   | -0.05  | 0.05   | 0.21   | 0.10   | 0.16   | 0.18   | 0.16   |
| 0.87                        | 0.09   | 0.13   | -0.10  | -0.08  | 0.01   | 0.15   | -0.12  | 0.10   | 0.03   | -0.06  | -0.14  |
| 0.92                        | -0.13  | 0.09   | -0.12  | -0.09  | 0.03   | 0.00   | -0.21  | -0.08  | -0.04  | -0.04  | -0.08  |
| 0.97                        | -0.24  | -0.29  | -0.20  | -0.22  | -0.17  | -0.21  | -0.14  | -0.30  | -0.21  | -0.25  | -0.12  |
| 1.02                        | 0.10   | 0.30   | 0.11   | -0.08  | -0.10  | -0.01  | -0.03  | 0.09   | -0.01  | -0.22  | -0.10  |
| 1.07                        | 0.01   | -0.03  | 0.12   | 0.01   | -0.04  | 0.09   | 0.03   | -0.14  | -0.11  | 0.04   | 0.10   |
| 1.12                        | -0.15  | -0.49  | -0.49  | -0.72  | -0.66  | -0.54  | -0.28  | -0.22  | -0.25  | -0.01  | -0.12  |
| 1.17                        | 8.85   | 8.07   | 6.78   | 5.54   | 4.20   | 3.01   | 2.01   | 0.97   | 0.50   | -0.13  | -0.38  |
| 1.22                        | 12.53  | 12.22  | 11.82  | 11.38  | 11.04  | 10.71  | 10.02  | 9.25   | 8.43   | 7.74   | 6.77   |
| 1.27                        | 12.53  | 12.79  | 12.46  | 12.40  | 12.28  | 11.72  | 11.48  | 11.07  | 10.80  | 10.23  | 9.57   |
| 1.32                        | 12.66  | 12.67  | 12.85  | 12.62  | 12.63  | 12.29  | 12.21  | 12.19  | 11.84  | 11.46  | 11.04  |
| 1.37                        | 11.44  | 11.48  | 11.18  | 10.89  | 10.82  | 10.74  | 10.42  | 10.32  | 10.03  | 9.79   | 9.57   |
| 1.42                        | 10.39  | 10.40  | 10.37  | 10.09  | 9.94   | 9.62   | 9.23   | 9.41   | 8.90   | 8.41   | 8.07   |
| 1.47                        | 10.07  | 9.92   | 9.84   | 9.75   | 9.35   | 9.27   | 8.86   | 8.82   | 8.44   | 8.15   | 7.70   |
| 1.52                        | 9.54   | 9.36   | 9.27   | 9.11   | 8.79   | 8.88   | 8.46   | 8.21   | 7.77   | 7.29   | 7.01   |
| 1.57                        | 9.07   | 8.98   | 8.79   | 8.67   | 8.40   | 8.20   | 8.02   | 7.60   | 7.28   | 6.87   | 6.63   |
| 1.62                        | 9.30   | 9.08   | 8.76   | 8.72   | 8.34   | 8.49   | 7.96   | 7.68   | 7.38   | 7.20   | 6.80   |

|      |      |      |      |      |      |      |      |      |      |      |      |
|------|------|------|------|------|------|------|------|------|------|------|------|
| 1.67 | 8.38 | 8.28 | 8.14 | 8.07 | 7.70 | 7.71 | 7.33 | 7.10 | 6.84 | 6.35 | 6.24 |
| 1.72 | 7.82 | 7.71 | 7.53 | 7.44 | 7.35 | 7.02 | 6.73 | 6.45 | 6.16 | 6.04 | 5.71 |
| 1.77 | 7.85 | 7.79 | 7.49 | 7.37 | 7.15 | 6.87 | 6.66 | 6.63 | 6.18 | 5.78 | 5.48 |
| 1.82 | 7.95 | 7.96 | 7.79 | 7.61 | 7.31 | 7.06 | 6.67 | 6.77 | 6.30 | 5.92 | 5.43 |
| 1.87 | 7.75 | 7.62 | 7.60 | 7.23 | 7.04 | 6.85 | 6.59 | 6.32 | 6.19 | 5.75 | 5.45 |
| 1.92 | 7.81 | 7.69 | 7.69 | 7.22 | 6.91 | 6.95 | 6.56 | 6.54 | 6.25 | 5.82 | 5.47 |
| 1.97 | 7.55 | 7.36 | 7.19 | 6.98 | 6.76 | 6.69 | 6.17 | 6.08 | 5.97 | 5.38 | 5.05 |
| 2.02 | 7.26 | 7.29 | 6.98 | 6.89 | 6.52 | 6.51 | 6.14 | 5.86 | 5.84 | 5.32 | 5.11 |
| 2.07 | 7.45 | 7.48 | 7.08 | 6.91 | 6.74 | 6.28 | 6.28 | 6.05 | 5.76 | 5.15 | 5.04 |
| 2.12 | 7.19 | 7.23 | 6.87 | 6.61 | 6.82 | 6.36 | 6.13 | 5.98 | 5.51 | 5.18 | 4.90 |
| 2.17 | 7.61 | 7.63 | 7.33 | 7.01 | 6.82 | 6.50 | 6.44 | 6.18 | 5.91 | 5.34 | 5.15 |
| 2.22 | 7.36 | 6.89 | 6.78 | 6.49 | 6.26 | 6.04 | 6.00 | 5.48 | 5.57 | 5.21 | 4.88 |
| 2.27 | 7.56 | 7.32 | 7.06 | 6.85 | 6.72 | 6.44 | 6.12 | 5.83 | 5.49 | 5.02 | 4.86 |
| 2.32 | 7.11 | 7.03 | 6.82 | 6.64 | 6.45 | 6.16 | 5.91 | 5.79 | 5.38 | 5.10 | 4.74 |
| 2.37 | 7.00 | 6.98 | 6.78 | 6.74 | 6.55 | 6.31 | 6.05 | 5.83 | 5.41 | 5.09 | 4.88 |
| 2.42 | 7.09 | 6.97 | 6.95 | 6.60 | 6.43 | 6.36 | 6.12 | 5.75 | 5.42 | 5.17 | 4.92 |
| 2.47 | 7.07 | 6.86 | 6.64 | 6.67 | 6.47 | 6.43 | 6.08 | 5.79 | 5.51 | 5.38 | 5.13 |
| 2.52 | 6.58 | 6.53 | 6.40 | 6.27 | 5.81 | 5.64 | 5.43 | 5.40 | 5.00 | 4.56 | 4.30 |
| 2.57 | 6.45 | 6.35 | 6.22 | 6.00 | 5.83 | 5.84 | 5.51 | 5.33 | 5.08 | 4.66 | 4.22 |
| 2.62 | 6.64 | 6.61 | 6.21 | 6.20 | 5.94 | 5.68 | 5.48 | 5.30 | 4.90 | 4.73 | 4.46 |
| 2.67 | 6.78 | 6.52 | 6.38 | 6.21 | 5.86 | 5.78 | 5.62 | 5.33 | 5.08 | 4.68 | 4.45 |
| 2.72 | 6.84 | 6.61 | 6.40 | 6.10 | 6.04 | 5.83 | 5.55 | 5.20 | 5.00 | 4.65 | 4.38 |
| 2.77 | 6.49 | 6.29 | 6.08 | 5.86 | 5.63 | 5.53 | 5.20 | 5.04 | 4.81 | 4.42 | 4.29 |
| 2.82 | 6.89 | 6.80 | 6.64 | 6.33 | 6.05 | 5.86 | 5.73 | 5.42 | 5.29 | 4.81 | 4.53 |
| 2.87 | 6.57 | 6.47 | 6.23 | 5.92 | 5.87 | 5.52 | 5.23 | 5.22 | 4.94 | 4.46 | 4.22 |
| 2.92 | 6.65 | 6.62 | 6.54 | 6.32 | 6.10 | 5.97 | 5.55 | 5.26 | 5.24 | 4.69 | 4.48 |
| 2.97 | 6.53 | 6.46 | 6.13 | 5.96 | 5.91 | 5.45 | 5.36 | 5.17 | 4.84 | 4.53 | 4.31 |
| 3.02 | 6.87 | 6.69 | 6.31 | 6.12 | 6.04 | 5.75 | 5.58 | 5.40 | 4.87 | 4.56 | 4.33 |
| 3.07 | 6.40 | 6.12 | 6.05 | 6.04 | 5.66 | 5.26 | 5.00 | 4.83 | 4.81 | 4.35 | 4.26 |
| 3.12 | 6.90 | 6.85 | 6.58 | 6.38 | 6.09 | 5.80 | 5.75 | 5.51 | 5.22 | 4.87 | 4.53 |
| 3.17 | 6.50 | 6.25 | 6.22 | 5.91 | 5.74 | 5.49 | 5.22 | 5.17 | 4.90 | 4.45 | 4.17 |
| 3.22 | 6.63 | 6.69 | 6.59 | 6.24 | 5.92 | 5.69 | 5.61 | 5.18 | 5.04 | 4.69 | 4.22 |
| 3.27 | 6.66 | 6.33 | 6.42 | 6.12 | 5.80 | 5.82 | 5.45 | 5.39 | 5.06 | 4.77 | 4.54 |
| 3.32 | 6.88 | 6.83 | 6.68 | 6.55 | 6.13 | 5.82 | 5.94 | 5.46 | 5.16 | 4.93 | 4.72 |
| 3.37 | 6.47 | 6.37 | 6.18 | 6.00 | 5.79 | 5.46 | 5.23 | 5.03 | 4.96 | 4.56 | 4.17 |
| 3.42 | 6.22 | 6.18 | 5.92 | 5.70 | 5.34 | 5.16 | 5.11 | 4.83 | 4.52 | 4.10 | 3.91 |
| 3.47 | 6.53 | 6.70 | 6.31 | 6.01 | 5.87 | 5.55 | 5.40 | 5.11 | 5.03 | 4.66 | 4.13 |
| 3.52 | 6.61 | 6.42 | 6.30 | 5.93 | 5.58 | 5.61 | 5.21 | 5.07 | 4.77 | 4.29 | 4.20 |
| 3.57 | 6.49 | 6.33 | 6.03 | 5.94 | 5.85 | 5.58 | 5.40 | 5.34 | 4.90 | 4.53 | 4.17 |
| 3.62 | 6.35 | 6.21 | 5.98 | 5.63 | 5.51 | 5.24 | 5.01 | 4.89 | 4.38 | 4.36 | 4.10 |
| 3.67 | 6.24 | 6.10 | 6.06 | 5.84 | 5.55 | 5.43 | 5.21 | 4.91 | 4.34 | 4.48 | 3.97 |
| 3.72 | 6.72 | 6.40 | 6.36 | 6.11 | 6.02 | 5.59 | 5.67 | 5.13 | 4.91 | 4.66 | 4.14 |
| 3.92 | 6.04 | 5.84 | 5.63 | 5.43 | 5.19 | 5.04 | 4.77 | 4.55 | 4.40 | 3.95 | 3.50 |
| 4.12 | 6.54 | 6.29 | 6.05 | 5.97 | 5.53 | 5.43 | 4.98 | 5.01 | 4.66 | 4.42 | 4.11 |
| 4.32 | 6.57 | 6.59 | 6.48 | 6.15 | 5.82 | 5.66 | 5.53 | 5.05 | 5.02 | 4.65 | 4.13 |
| 4.52 | 6.69 | 6.78 | 6.34 | 6.00 | 5.81 | 5.54 | 5.56 | 5.06 | 4.94 | 4.44 | 4.23 |
| 4.72 | 6.16 | 6.08 | 5.90 | 5.64 | 5.41 | 5.41 | 4.92 | 4.73 | 4.46 | 4.20 | 4.13 |
| 4.92 | 6.27 | 6.28 | 6.07 | 5.85 | 5.44 | 5.25 | 5.04 | 4.90 | 4.53 | 4.22 | 4.13 |
| 5.12 | 6.08 | 6.23 | 5.69 | 5.53 | 5.53 | 5.29 | 4.99 | 4.72 | 4.46 | 4.10 | 3.72 |
| 5.32 | 6.28 | 6.20 | 6.04 | 5.72 | 5.65 | 5.14 | 5.01 | 4.91 | 4.67 | 4.14 | 3.70 |

|       |      |      |      |      |      |      |      |      |      |      |      |
|-------|------|------|------|------|------|------|------|------|------|------|------|
| 5.52  | 6.26 | 6.03 | 5.87 | 5.85 | 5.43 | 5.39 | 5.05 | 4.72 | 4.42 | 4.03 | 3.69 |
| 5.72  | 5.98 | 5.96 | 5.59 | 5.52 | 5.18 | 5.01 | 4.67 | 4.53 | 4.18 | 3.81 | 3.55 |
| 5.92  | 6.20 | 6.35 | 6.05 | 5.75 | 5.51 | 5.30 | 5.03 | 4.75 | 4.62 | 4.21 | 3.95 |
| 6.12  | 5.95 | 5.89 | 5.45 | 5.55 | 5.19 | 4.95 | 4.52 | 4.57 | 4.19 | 3.76 | 3.72 |
| 6.32  | 5.97 | 5.93 | 5.49 | 5.48 | 5.25 | 5.07 | 4.88 | 4.44 | 4.15 | 3.99 | 3.69 |
| 6.52  | 6.29 | 6.23 | 6.13 | 5.77 | 5.46 | 5.42 | 5.21 | 4.64 | 4.49 | 4.40 | 3.85 |
| 6.72  | 5.86 | 5.59 | 5.68 | 5.29 | 5.22 | 4.87 | 4.61 | 4.47 | 4.22 | 3.57 | 3.60 |
| 6.92  | 5.71 | 5.59 | 5.54 | 5.28 | 4.95 | 4.79 | 4.61 | 4.30 | 4.14 | 3.82 | 3.60 |
| 7.12  | 6.01 | 5.89 | 5.75 | 5.35 | 5.25 | 4.97 | 4.81 | 4.66 | 4.31 | 3.92 | 3.81 |
| 7.32  | 6.23 | 6.04 | 5.77 | 5.78 | 5.29 | 4.93 | 4.88 | 4.63 | 4.61 | 4.01 | 3.87 |
| 7.52  | 6.34 | 6.31 | 6.04 | 5.72 | 5.53 | 5.21 | 5.13 | 4.68 | 4.68 | 4.31 | 4.23 |
| 7.72  | 5.79 | 5.97 | 5.49 | 5.07 | 4.79 | 5.03 | 4.62 | 4.32 | 4.18 | 3.60 | 3.31 |
| 7.92  | 6.10 | 6.04 | 5.64 | 5.60 | 5.05 | 4.87 | 4.90 | 4.56 | 4.27 | 4.23 | 3.80 |
| 8.12  | 5.88 | 5.79 | 5.55 | 5.19 | 5.18 | 4.77 | 4.51 | 4.49 | 4.09 | 3.65 | 3.51 |
| 8.32  | 6.00 | 6.19 | 5.79 | 5.43 | 5.41 | 5.15 | 4.81 | 4.70 | 4.53 | 4.07 | 3.85 |
| 8.52  | 6.02 | 5.91 | 5.88 | 5.51 | 5.21 | 5.08 | 5.00 | 4.55 | 4.29 | 3.92 | 3.72 |
| 8.72  | 6.19 | 6.00 | 5.57 | 5.35 | 5.19 | 4.98 | 4.71 | 4.56 | 4.25 | 3.73 | 3.52 |
| 8.92  | 5.50 | 5.74 | 5.26 | 4.99 | 4.91 | 4.70 | 4.65 | 4.15 | 4.04 | 3.78 | 3.46 |
| 9.12  | 5.87 | 5.77 | 5.68 | 5.49 | 5.12 | 5.06 | 4.72 | 4.42 | 4.23 | 3.84 | 3.71 |
| 9.32  | 5.65 | 5.44 | 5.25 | 4.84 | 4.84 | 4.41 | 4.26 | 4.09 | 3.74 | 3.47 | 3.11 |
| 9.52  | 5.85 | 5.77 | 5.37 | 5.09 | 5.10 | 4.76 | 4.71 | 4.38 | 4.11 | 3.74 | 3.34 |
| 9.72  | 6.01 | 5.84 | 5.59 | 5.35 | 5.31 | 4.84 | 4.75 | 4.65 | 4.19 | 3.86 | 3.44 |
| 9.92  | 5.91 | 5.65 | 5.26 | 5.07 | 4.94 | 4.62 | 4.47 | 4.10 | 3.84 | 3.84 | 3.25 |
| 10.12 | 6.07 | 6.09 | 5.85 | 5.63 | 5.27 | 5.16 | 4.78 | 4.65 | 4.41 | 4.13 | 3.83 |
| 10.32 | 5.76 | 5.60 | 5.44 | 5.19 | 4.96 | 4.67 | 4.48 | 4.33 | 4.07 | 3.65 | 3.39 |
| 10.52 | 5.91 | 5.71 | 5.70 | 5.39 | 5.13 | 4.82 | 4.69 | 4.39 | 3.99 | 3.87 | 3.50 |
| 10.72 | 5.64 | 5.49 | 5.20 | 5.04 | 4.87 | 4.69 | 4.35 | 4.26 | 3.83 | 3.77 | 3.36 |
| 10.92 | 6.18 | 5.89 | 5.72 | 5.47 | 5.43 | 5.10 | 4.80 | 4.65 | 4.39 | 4.04 | 3.66 |
| 11.12 | 5.76 | 5.35 | 5.47 | 5.17 | 4.68 | 4.60 | 4.34 | 4.01 | 3.81 | 3.64 | 3.32 |
| 11.32 | 5.68 | 5.56 | 5.41 | 5.05 | 5.06 | 4.66 | 4.64 | 4.24 | 3.80 | 3.48 | 3.27 |
| 11.52 | 6.01 | 5.82 | 5.54 | 5.30 | 5.30 | 5.04 | 4.75 | 4.40 | 4.27 | 3.80 | 3.65 |
| 11.72 | 5.77 | 5.51 | 5.59 | 5.09 | 4.96 | 4.54 | 4.57 | 4.16 | 3.93 | 3.48 | 3.33 |
| 11.92 | 6.12 | 6.06 | 5.80 | 5.55 | 5.41 | 5.14 | 4.75 | 4.40 | 4.22 | 4.10 | 3.75 |
| 12.12 | 6.03 | 5.87 | 5.54 | 5.31 | 5.16 | 4.90 | 4.78 | 4.67 | 4.36 | 4.04 | 3.78 |
| 12.32 | 5.88 | 5.73 | 5.24 | 5.31 | 4.85 | 4.69 | 4.46 | 4.21 | 3.90 | 3.61 | 3.37 |
| 12.52 | 5.61 | 5.69 | 5.33 | 5.16 | 4.94 | 4.68 | 4.57 | 4.10 | 4.00 | 3.75 | 3.44 |
| 12.72 | 5.66 | 5.55 | 5.21 | 5.00 | 4.80 | 4.57 | 4.34 | 4.07 | 3.86 | 3.47 | 3.07 |
| 12.92 | 5.60 | 5.59 | 5.39 | 5.22 | 4.90 | 4.77 | 4.60 | 4.17 | 4.01 | 3.52 | 3.43 |
| 13.12 | 6.08 | 5.81 | 5.71 | 5.57 | 5.32 | 4.87 | 4.64 | 4.50 | 4.23 | 3.84 | 3.73 |
| 13.32 | 5.49 | 5.43 | 5.30 | 5.04 | 4.82 | 4.44 | 4.31 | 3.93 | 3.88 | 3.42 | 3.10 |
| 13.52 | 5.59 | 5.46 | 5.39 | 5.21 | 4.81 | 4.68 | 4.48 | 4.09 | 4.06 | 3.71 | 3.49 |
| 13.72 | 5.55 | 5.64 | 5.50 | 5.06 | 4.62 | 4.70 | 4.34 | 4.27 | 4.07 | 3.61 | 3.43 |
| 13.92 | 5.73 | 5.61 | 5.43 | 5.14 | 4.88 | 4.72 | 4.46 | 4.31 | 4.06 | 3.66 | 3.36 |
| 14    | 5.62 | 5.62 | 5.41 | 5.25 | 4.96 | 4.89 | 4.65 | 4.23 | 3.97 | 3.69 | 3.48 |
| 14.08 | 5.79 | 5.67 | 5.44 | 5.28 | 4.84 | 4.58 | 4.35 | 4.25 | 3.77 | 3.67 | 3.47 |
| 14.17 | 5.82 | 5.64 | 5.27 | 5.20 | 4.87 | 4.64 | 4.28 | 4.15 | 3.80 | 3.65 | 3.25 |
| 14.27 | 5.77 | 5.71 | 5.32 | 5.24 | 4.99 | 4.63 | 4.59 | 4.40 | 3.98 | 3.54 | 3.36 |
| 14.38 | 5.75 | 5.49 | 5.46 | 5.10 | 4.98 | 4.76 | 4.28 | 4.07 | 4.02 | 3.66 | 3.40 |
| 14.49 | 5.32 | 5.53 | 4.84 | 4.90 | 4.90 | 4.57 | 4.33 | 4.09 | 3.57 | 3.45 | 3.16 |
| 14.61 | 5.86 | 5.56 | 5.56 | 5.43 | 5.04 | 4.87 | 4.74 | 4.38 | 4.20 | 3.85 | 3.38 |

|       |      |      |      |      |      |      |      |      |      |      |      |
|-------|------|------|------|------|------|------|------|------|------|------|------|
| 14.75 | 5.52 | 5.52 | 5.43 | 5.23 | 5.07 | 4.70 | 4.50 | 4.29 | 4.08 | 3.76 | 3.37 |
| 14.89 | 5.77 | 5.88 | 5.51 | 5.27 | 4.87 | 4.81 | 4.35 | 4.23 | 4.15 | 3.60 | 3.27 |
| 15.05 | 5.71 | 5.41 | 5.26 | 5.06 | 4.89 | 4.56 | 4.46 | 4.13 | 3.97 | 3.61 | 3.34 |
| 15.21 | 5.65 | 5.35 | 5.26 | 5.16 | 4.79 | 4.65 | 4.43 | 3.97 | 3.89 | 3.47 | 3.30 |
| 15.39 | 5.57 | 5.47 | 5.12 | 4.87 | 4.95 | 4.55 | 4.32 | 3.79 | 3.83 | 3.53 | 3.06 |
| 15.59 | 5.74 | 5.32 | 5.32 | 5.19 | 4.71 | 4.60 | 4.25 | 4.03 | 3.79 | 3.32 | 3.11 |
| 15.8  | 5.45 | 5.26 | 5.54 | 4.97 | 4.81 | 4.54 | 4.34 | 4.24 | 3.95 | 3.53 | 3.20 |
| 16.02 | 5.66 | 5.66 | 5.33 | 4.98 | 4.76 | 4.57 | 4.21 | 4.21 | 3.86 | 3.61 | 3.16 |
| 16.27 | 5.69 | 5.63 | 5.21 | 5.07 | 4.84 | 4.66 | 4.51 | 4.14 | 3.83 | 3.60 | 3.38 |
| 16.53 | 5.82 | 5.48 | 5.27 | 5.07 | 4.79 | 4.54 | 4.37 | 4.26 | 3.76 | 3.59 | 3.33 |
| 16.81 | 5.60 | 5.67 | 5.27 | 5.21 | 4.96 | 4.70 | 4.20 | 4.11 | 4.02 | 3.61 | 3.40 |
| 17.12 | 5.59 | 5.63 | 5.15 | 5.15 | 4.79 | 4.62 | 4.43 | 4.14 | 3.95 | 3.52 | 3.48 |
| 17.45 | 5.55 | 5.71 | 5.49 | 5.18 | 4.89 | 4.55 | 4.59 | 4.04 | 4.00 | 3.57 | 3.19 |
| 17.81 | 5.47 | 5.52 | 5.26 | 4.90 | 4.74 | 4.49 | 4.26 | 4.08 | 3.93 | 3.73 | 3.41 |
| 18.19 | 5.39 | 5.21 | 5.01 | 4.80 | 4.70 | 4.40 | 4.46 | 3.97 | 3.93 | 3.47 | 3.11 |
| 18.6  | 5.49 | 5.22 | 5.02 | 4.81 | 4.63 | 4.39 | 4.14 | 3.81 | 3.66 | 3.35 | 3.10 |
| 19.05 | 5.51 | 5.02 | 4.87 | 4.78 | 4.59 | 4.20 | 4.13 | 3.90 | 3.64 | 3.29 | 3.11 |
| 19.53 | 5.43 | 5.41 | 5.02 | 5.13 | 4.97 | 4.62 | 4.44 | 4.31 | 3.74 | 3.68 | 3.51 |
| 20.05 | 5.48 | 5.18 | 5.10 | 4.97 | 4.45 | 4.49 | 4.08 | 4.00 | 3.66 | 3.31 | 3.13 |
| 20.61 | 5.42 | 5.33 | 5.07 | 4.80 | 4.75 | 4.43 | 4.32 | 3.78 | 3.71 | 3.45 | 3.17 |
| 21.22 | 5.46 | 5.25 | 5.06 | 4.80 | 4.48 | 4.43 | 3.96 | 4.00 | 3.74 | 3.40 | 3.04 |
| 21.87 | 5.73 | 5.44 | 5.30 | 5.02 | 4.85 | 4.46 | 4.17 | 4.22 | 3.80 | 3.54 | 3.41 |
| 22.57 | 5.40 | 5.15 | 5.03 | 4.79 | 4.60 | 4.53 | 4.22 | 3.96 | 3.96 | 3.60 | 3.14 |
| 23.33 | 5.63 | 5.39 | 5.11 | 4.93 | 4.70 | 4.25 | 4.12 | 4.04 | 3.74 | 3.34 | 3.21 |
| 24.15 | 5.25 | 5.14 | 5.01 | 4.72 | 4.56 | 4.24 | 3.96 | 3.74 | 3.40 | 3.12 | 3.03 |
| 25.03 | 5.35 | 5.00 | 5.18 | 4.79 | 4.63 | 4.37 | 4.22 | 3.95 | 3.65 | 3.42 | 3.09 |
| 25.98 | 5.30 | 5.35 | 5.13 | 4.61 | 4.54 | 4.19 | 3.94 | 3.73 | 3.67 | 3.18 | 2.93 |
| 27.01 | 5.04 | 5.03 | 4.72 | 4.56 | 4.31 | 4.18 | 3.95 | 3.79 | 3.40 | 3.07 | 2.98 |
| 28.11 | 5.43 | 5.30 | 5.11 | 4.79 | 4.58 | 4.54 | 4.12 | 3.94 | 3.61 | 3.36 | 3.17 |
| 29.3  | 5.29 | 5.18 | 4.99 | 4.50 | 4.26 | 4.12 | 3.77 | 3.47 | 3.36 | 2.94 | 2.75 |
| 30.59 | 5.14 | 5.23 | 5.01 | 4.47 | 4.38 | 4.37 | 3.98 | 3.61 | 3.51 | 3.20 | 3.16 |
| 31.98 | 5.38 | 5.28 | 4.99 | 4.77 | 4.49 | 4.36 | 4.21 | 3.75 | 3.58 | 3.20 | 2.96 |
| 33.47 | 5.27 | 5.24 | 4.86 | 4.75 | 4.59 | 4.32 | 3.99 | 3.81 | 3.68 | 3.03 | 3.06 |
| 35.09 | 5.47 | 5.26 | 5.07 | 4.85 | 4.52 | 4.23 | 4.06 | 3.81 | 3.79 | 3.39 | 3.21 |
| 36.83 | 5.18 | 5.06 | 4.67 | 4.49 | 4.46 | 4.00 | 3.77 | 3.56 | 3.30 | 3.08 | 2.65 |
| 38.71 | 5.25 | 5.14 | 4.72 | 4.53 | 4.41 | 4.26 | 3.92 | 3.69 | 3.41 | 3.26 | 2.84 |
| 40.73 | 4.98 | 4.97 | 4.78 | 4.61 | 4.47 | 4.33 | 3.97 | 3.81 | 3.54 | 3.21 | 2.97 |
| 42.92 | 5.28 | 5.17 | 4.93 | 4.77 | 4.50 | 4.21 | 4.23 | 3.90 | 3.89 | 3.30 | 3.10 |
| 45.27 | 5.56 | 5.27 | 5.13 | 4.89 | 4.68 | 4.48 | 4.34 | 4.04 | 3.77 | 3.36 | 3.19 |
| 47.81 | 5.13 | 5.03 | 4.61 | 4.53 | 4.29 | 4.12 | 3.96 | 3.78 | 3.39 | 3.23 | 2.69 |
| 50.55 | 5.16 | 4.82 | 4.76 | 4.52 | 4.30 | 3.89 | 3.55 | 3.38 | 3.24 | 2.90 | 2.66 |
| 53.51 | 4.64 | 4.57 | 4.41 | 4.20 | 3.92 | 3.73 | 3.46 | 3.17 | 2.94 | 2.52 | 2.26 |
| 56.69 | 4.83 | 4.64 | 4.62 | 4.52 | 4.14 | 3.95 | 3.62 | 3.33 | 3.14 | 2.79 | 2.42 |
| 60.13 | 4.81 | 4.88 | 4.55 | 4.21 | 3.73 | 3.75 | 3.55 | 3.43 | 3.32 | 2.92 | 2.65 |
| 63.84 | 4.96 | 4.70 | 4.41 | 4.31 | 4.14 | 3.81 | 3.64 | 3.59 | 3.18 | 2.93 | 2.76 |
| 67.83 | 4.80 | 4.78 | 4.51 | 4.26 | 4.07 | 3.87 | 3.58 | 3.41 | 2.89 | 2.79 | 2.29 |
| 72.15 | 4.95 | 4.62 | 4.48 | 4.22 | 3.86 | 3.69 | 3.55 | 3.45 | 3.26 | 2.77 | 2.53 |
| 76.8  | 4.77 | 4.59 | 4.32 | 4.11 | 4.02 | 3.80 | 3.59 | 3.46 | 3.06 | 2.69 | 2.56 |
| 81.81 | 4.91 | 4.68 | 4.59 | 4.32 | 4.14 | 3.84 | 3.69 | 3.59 | 3.12 | 2.83 | 2.87 |
| 87.22 | 4.72 | 4.74 | 4.50 | 4.38 | 4.25 | 4.00 | 3.59 | 3.37 | 2.95 | 2.61 | 2.63 |

|         |      |      |      |      |      |      |      |      |      |      |      |
|---------|------|------|------|------|------|------|------|------|------|------|------|
| 93.06   | 5.10 | 4.79 | 4.61 | 4.43 | 4.11 | 3.87 | 3.64 | 3.37 | 2.98 | 2.75 | 2.52 |
| 99.35   | 4.86 | 4.87 | 4.67 | 4.29 | 4.10 | 3.74 | 3.65 | 3.74 | 3.17 | 3.02 | 2.80 |
| 106.13  | 4.66 | 4.68 | 4.51 | 3.96 | 3.98 | 3.67 | 3.41 | 3.33 | 2.96 | 2.52 | 2.45 |
| 113.45  | 4.73 | 4.87 | 4.57 | 4.29 | 3.90 | 3.82 | 3.59 | 3.37 | 3.04 | 2.95 | 2.43 |
| 121.34  | 4.94 | 4.80 | 4.60 | 4.46 | 4.10 | 3.78 | 3.61 | 3.41 | 3.26 | 2.75 | 2.57 |
| 129.86  | 4.60 | 4.62 | 4.36 | 4.17 | 3.74 | 3.57 | 3.40 | 3.24 | 3.09 | 2.77 | 2.66 |
| 139.04  | 4.58 | 4.47 | 4.20 | 3.95 | 3.82 | 3.52 | 3.46 | 3.30 | 2.82 | 2.77 | 2.72 |
| 148.94  | 4.43 | 4.45 | 4.05 | 4.08 | 3.98 | 3.58 | 3.24 | 3.02 | 2.88 | 2.77 | 2.43 |
| 159.62  | 4.55 | 4.53 | 4.06 | 3.89 | 3.57 | 3.55 | 3.44 | 3.21 | 2.92 | 2.40 | 2.43 |
| 171.14  | 4.62 | 4.72 | 4.18 | 3.96 | 3.71 | 3.65 | 3.36 | 3.11 | 2.93 | 2.89 | 2.59 |
| 183.56  | 4.24 | 4.21 | 4.13 | 3.82 | 3.73 | 3.50 | 3.43 | 3.14 | 2.79 | 2.46 | 2.35 |
| 196.96  | 4.61 | 4.65 | 4.14 | 3.90 | 3.83 | 3.52 | 3.27 | 3.17 | 2.94 | 2.57 | 2.25 |
| 211.41  | 4.35 | 4.49 | 4.32 | 3.91 | 3.96 | 3.51 | 3.52 | 3.22 | 2.83 | 2.78 | 2.56 |
| 226.99  | 4.49 | 4.47 | 4.34 | 4.04 | 3.87 | 3.69 | 3.43 | 3.24 | 2.94 | 2.69 | 2.37 |
| 243.8   | 4.16 | 4.32 | 3.95 | 3.70 | 3.62 | 3.35 | 3.20 | 2.90 | 2.68 | 2.35 | 2.27 |
| 261.93  | 4.46 | 4.30 | 3.98 | 3.72 | 3.60 | 3.19 | 3.18 | 2.85 | 2.68 | 2.35 | 2.07 |
| 281.48  | 4.70 | 4.58 | 4.47 | 4.21 | 3.80 | 3.54 | 3.50 | 3.16 | 3.10 | 2.82 | 2.54 |
| 302.56  | 4.46 | 4.19 | 3.85 | 3.91 | 3.71 | 3.34 | 3.28 | 3.14 | 2.81 | 2.49 | 2.44 |
| 325.3   | 4.27 | 4.26 | 4.06 | 3.65 | 3.51 | 3.48 | 3.21 | 2.80 | 2.70 | 2.27 | 2.18 |
| 349.83  | 4.04 | 3.75 | 3.89 | 3.62 | 3.29 | 3.07 | 3.15 | 2.97 | 2.68 | 2.31 | 2.02 |
| 376.28  | 4.13 | 4.05 | 3.76 | 3.73 | 3.50 | 3.39 | 3.12 | 3.03 | 2.76 | 2.44 | 2.26 |
| 404.81  | 4.44 | 4.18 | 4.00 | 3.70 | 3.85 | 3.57 | 3.42 | 3.17 | 2.89 | 2.82 | 2.37 |
| 435.58  | 4.04 | 3.77 | 3.53 | 3.43 | 3.18 | 3.02 | 2.80 | 2.59 | 2.41 | 2.18 | 2.00 |
| 468.76  | 4.20 | 3.99 | 3.97 | 3.83 | 3.62 | 3.36 | 3.05 | 3.00 | 2.80 | 2.69 | 2.14 |
| 504.55  | 4.15 | 3.94 | 4.02 | 3.85 | 3.46 | 3.36 | 3.24 | 2.82 | 2.58 | 2.39 | 2.26 |
| 543.15  | 3.84 | 4.00 | 3.74 | 3.44 | 3.28 | 2.99 | 2.82 | 2.95 | 2.50 | 2.32 | 2.16 |
| 584.78  | 4.14 | 3.87 | 4.00 | 3.53 | 3.29 | 3.13 | 3.13 | 2.90 | 2.69 | 2.28 | 2.11 |
| 629.68  | 4.02 | 3.92 | 3.66 | 3.52 | 3.43 | 3.15 | 3.02 | 2.85 | 2.67 | 2.27 | 2.20 |
| 678.1   | 4.12 | 4.03 | 3.95 | 3.49 | 3.53 | 3.38 | 3.22 | 2.92 | 3.06 | 2.42 | 2.32 |
| 730.33  | 3.83 | 3.66 | 3.71 | 3.38 | 3.27 | 3.01 | 2.75 | 2.77 | 2.33 | 2.29 | 2.08 |
| 786.65  | 3.74 | 3.80 | 3.54 | 3.48 | 3.18 | 2.98 | 2.79 | 2.86 | 2.45 | 2.34 | 2.05 |
| 847.4   | 3.54 | 3.23 | 3.30 | 3.18 | 3.04 | 2.95 | 2.65 | 2.54 | 2.34 | 2.03 | 1.74 |
| 912.92  | 3.77 | 3.69 | 3.45 | 3.39 | 3.18 | 2.80 | 2.80 | 2.63 | 2.45 | 2.34 | 2.09 |
| 983.58  | 3.78 | 3.71 | 3.33 | 3.32 | 3.22 | 3.05 | 2.99 | 2.76 | 2.35 | 2.17 | 2.09 |
| 1059.78 | 3.89 | 3.78 | 3.61 | 3.31 | 3.34 | 2.97 | 3.03 | 2.84 | 2.61 | 2.23 | 2.36 |
| 1141.98 | 3.75 | 3.85 | 3.31 | 3.37 | 3.20 | 3.10 | 2.94 | 2.66 | 2.74 | 2.17 | 1.99 |
| 1230.62 | 3.73 | 3.53 | 3.30 | 3.21 | 3.03 | 2.86 | 2.82 | 2.47 | 2.35 | 2.21 | 1.89 |
| 1326.23 | 3.84 | 3.67 | 3.51 | 3.28 | 3.09 | 3.08 | 2.81 | 2.82 | 2.48 | 2.32 | 1.93 |
| 1429.34 | 3.92 | 3.57 | 3.54 | 3.60 | 3.44 | 3.16 | 2.85 | 2.93 | 2.54 | 2.32 | 1.97 |
| 1540.54 | 3.41 | 3.25 | 3.35 | 3.12 | 2.94 | 2.82 | 2.57 | 2.42 | 2.16 | 1.95 | 1.90 |
| 1660.48 | 3.62 | 3.46 | 3.26 | 3.16 | 2.97 | 2.81 | 2.71 | 2.67 | 2.43 | 2.10 | 2.01 |
| 1789.83 | 3.25 | 3.06 | 3.08 | 2.80 | 2.68 | 2.52 | 2.16 | 2.07 | 1.90 | 1.76 | 1.45 |
| 1929.34 | 3.86 | 3.60 | 3.57 | 3.41 | 3.21 | 3.17 | 2.86 | 2.68 | 2.35 | 2.31 | 1.89 |
| 2079.8  | 3.37 | 3.31 | 3.25 | 2.91 | 2.80 | 2.83 | 2.44 | 2.46 | 2.24 | 1.84 | 1.63 |
| 2242.08 | 3.64 | 3.65 | 3.43 | 3.14 | 2.86 | 2.83 | 2.56 | 2.56 | 2.31 | 2.06 | 1.71 |
| 2417.1  | 3.34 | 3.41 | 3.30 | 2.98 | 2.70 | 2.72 | 2.79 | 2.53 | 2.26 | 2.00 | 1.96 |
| 2605.85 | 3.33 | 3.31 | 2.98 | 2.96 | 2.86 | 2.67 | 2.55 | 2.33 | 2.16 | 1.81 | 1.64 |
| 2809.43 | 3.35 | 3.39 | 3.17 | 2.86 | 2.90 | 2.57 | 2.60 | 2.21 | 2.18 | 1.84 | 1.78 |
| 3028.99 | 3.50 | 3.59 | 3.31 | 3.20 | 3.02 | 3.01 | 2.52 | 2.59 | 2.37 | 2.09 | 1.94 |
| 3265.79 | 3.44 | 3.45 | 2.92 | 2.99 | 2.65 | 2.64 | 2.49 | 2.19 | 2.01 | 1.62 | 1.51 |



|         |      |      |      |      |      |      |      |      |      |      |      |
|---------|------|------|------|------|------|------|------|------|------|------|------|
| 3521.18 | 3.18 | 3.10 | 2.89 | 2.75 | 2.69 | 2.41 | 2.15 | 2.26 | 1.84 | 1.83 | 1.47 |
| 3796.62 | 3.25 | 3.03 | 2.79 | 2.69 | 2.80 | 2.42 | 2.15 | 1.99 | 1.92 | 1.67 | 1.43 |

| Wavelength<br>Time<br>(ps) | 444.66 | 446.06 | 447.47 | 448.88 | 450.29 | 451.70 | 453.11 | 454.52 | 455.92 | 457.33 | 458.74 |
|----------------------------|--------|--------|--------|--------|--------|--------|--------|--------|--------|--------|--------|
| -3.28                      | 0.20   | 0.40   | 0.18   | 0.11   | 0.21   | 0.18   | 0.26   | 0.10   | 0.10   | 0.27   | 0.35   |
| -2.78                      | 0.24   | -0.13  | 0.14   | 0.06   | 0.03   | 0.07   | -0.04  | 0.04   | -0.05  | -0.03  | 0.09   |
| -2.28                      | -0.05  | -0.04  | -0.13  | -0.12  | -0.17  | 0.11   | 0.06   | -0.06  | -0.06  | 0.11   | 0.15   |
| -1.78                      | -0.02  | -0.01  | -0.01  | 0.10   | -0.06  | 0.05   | -0.06  | -0.07  | 0.04   | -0.06  | -0.08  |
| -1.28                      | -0.28  | -0.20  | -0.12  | -0.26  | -0.03  | -0.23  | -0.35  | -0.24  | -0.20  | -0.27  | -0.33  |
| -0.78                      | 0.14   | -0.01  | 0.03   | 0.22   | 0.11   | 0.05   | 0.19   | 0.03   | 0.22   | 0.14   | -0.05  |
| -0.28                      | -0.28  | -0.18  | -0.24  | -0.21  | -0.19  | -0.38  | -0.26  | -0.07  | -0.22  | -0.27  | -0.15  |
| 0.22                       | 0.05   | 0.16   | 0.14   | 0.09   | 0.10   | 0.15   | 0.20   | 0.27   | 0.17   | 0.10   | 0.01   |
| 0.32                       | -0.07  | 0.12   | 0.12   | 0.14   | 0.21   | 0.08   | 0.18   | 0.09   | 0.21   | 0.00   | 0.14   |
| 0.42                       | 0.04   | -0.30  | -0.28  | -0.06  | -0.02  | -0.09  | -0.10  | -0.15  | -0.12  | -0.06  | -0.07  |
| 0.52                       | -0.38  | -0.33  | -0.26  | -0.25  | -0.22  | -0.06  | -0.23  | -0.35  | -0.30  | -0.32  | -0.25  |
| 0.62                       | 0.03   | 0.14   | 0.19   | 0.31   | 0.27   | 0.01   | 0.31   | 0.04   | 0.11   | 0.02   | 0.17   |
| 0.72                       | -0.33  | -0.33  | -0.36  | -0.33  | -0.16  | -0.15  | -0.25  | -0.27  | -0.31  | -0.09  | -0.15  |
| 0.77                       | 0.15   | 0.10   | 0.04   | 0.13   | 0.08   | 0.21   | 0.07   | 0.08   | 0.10   | 0.27   | -0.06  |
| 0.82                       | 0.07   | 0.00   | 0.03   | 0.21   | 0.25   | -0.02  | 0.20   | 0.06   | 0.02   | 0.23   | 0.08   |
| 0.87                       | -0.14  | 0.07   | -0.07  | 0.07   | 0.10   | 0.09   | 0.11   | -0.03  | -0.06  | -0.08  | 0.05   |
| 0.92                       | -0.04  | -0.17  | -0.06  | 0.10   | 0.01   | -0.19  | -0.16  | -0.11  | -0.11  | -0.13  | 0.03   |
| 0.97                       | -0.19  | -0.22  | -0.24  | -0.27  | -0.17  | -0.14  | -0.18  | -0.10  | -0.16  | -0.13  | -0.16  |
| 1.02                       | -0.07  | 0.02   | -0.18  | 0.06   | -0.06  | -0.07  | -0.08  | -0.14  | -0.06  | -0.03  | -0.07  |
| 1.07                       | 0.14   | 0.18   | -0.13  | 0.11   | -0.02  | 0.06   | 0.05   | 0.02   | -0.06  | 0.23   | -0.11  |
| 1.12                       | -0.03  | -0.15  | -0.05  | 0.07   | -0.04  | 0.14   | -0.01  | -0.08  | 0.03   | 0.00   | -0.19  |
| 1.17                       | -0.72  | -0.81  | -0.87  | -0.89  | -0.98  | -0.86  | -0.86  | -0.68  | -0.89  | -0.52  | -0.46  |
| 1.22                       | 5.88   | 4.83   | 3.87   | 3.01   | 2.19   | 1.23   | 0.77   | 0.11   | -0.16  | -0.32  | -0.60  |
| 1.27                       | 9.23   | 8.49   | 7.80   | 7.47   | 6.54   | 5.94   | 5.11   | 4.48   | 3.84   | 3.22   | 2.79   |
| 1.32                       | 10.86  | 10.17  | 9.79   | 9.39   | 8.68   | 8.05   | 7.23   | 6.73   | 6.19   | 5.70   | 5.19   |
| 1.37                       | 9.58   | 9.21   | 9.07   | 8.72   | 8.65   | 8.41   | 8.11   | 8.17   | 7.77   | 7.85   | 7.45   |
| 1.42                       | 7.81   | 7.47   | 7.06   | 6.67   | 6.35   | 5.82   | 5.32   | 4.85   | 4.16   | 4.00   | 3.41   |
| 1.47                       | 7.22   | 7.08   | 6.44   | 6.14   | 5.66   | 5.19   | 4.73   | 3.98   | 3.65   | 2.98   | 2.27   |
| 1.52                       | 6.59   | 6.47   | 5.81   | 5.42   | 5.11   | 4.54   | 4.01   | 3.34   | 2.89   | 2.53   | 1.65   |
| 1.57                       | 6.38   | 6.03   | 5.43   | 5.00   | 4.67   | 4.08   | 3.51   | 2.97   | 2.57   | 2.16   | 1.30   |
| 1.62                       | 6.20   | 5.91   | 5.58   | 5.27   | 4.79   | 4.25   | 3.75   | 3.24   | 2.59   | 2.11   | 1.63   |
| 1.67                       | 5.58   | 5.34   | 4.95   | 4.41   | 4.31   | 3.61   | 3.08   | 2.79   | 2.19   | 1.76   | 1.24   |
| 1.72                       | 5.31   | 4.89   | 4.51   | 4.33   | 3.90   | 3.39   | 2.85   | 2.52   | 2.07   | 1.48   | 0.96   |
| 1.77                       | 5.17   | 4.94   | 4.33   | 3.88   | 3.85   | 3.43   | 2.79   | 2.57   | 1.86   | 1.32   | 0.75   |
| 1.82                       | 5.40   | 5.04   | 4.49   | 4.20   | 3.76   | 3.27   | 3.00   | 2.54   | 2.11   | 1.59   | 1.02   |
| 1.87                       | 5.24   | 4.81   | 4.53   | 4.19   | 3.69   | 3.28   | 2.86   | 2.43   | 2.06   | 1.35   | 1.05   |
| 1.92                       | 5.23   | 4.88   | 4.67   | 4.20   | 3.69   | 3.35   | 2.98   | 2.49   | 2.19   | 1.73   | 1.37   |
| 1.97                       | 4.95   | 4.72   | 4.06   | 3.81   | 3.55   | 2.91   | 2.60   | 2.18   | 1.76   | 1.37   | 0.74   |
| 2.02                       | 4.76   | 4.46   | 4.01   | 3.82   | 3.37   | 3.12   | 2.42   | 2.25   | 1.63   | 1.26   | 0.87   |
| 2.07                       | 4.77   | 4.42   | 4.19   | 3.78   | 3.37   | 2.96   | 2.58   | 2.04   | 1.74   | 1.32   | 0.84   |
| 2.12                       | 4.65   | 4.37   | 4.06   | 3.77   | 3.35   | 2.86   | 2.46   | 2.09   | 1.56   | 1.23   | 0.91   |
| 2.17                       | 4.80   | 4.56   | 4.10   | 3.93   | 3.58   | 3.20   | 2.82   | 2.30   | 1.76   | 1.33   | 1.03   |
| 2.22                       | 4.64   | 4.33   | 3.89   | 3.65   | 3.44   | 2.88   | 2.41   | 2.30   | 1.50   | 1.20   | 0.98   |

|      |      |      |      |      |      |      |      |      |      |      |       |
|------|------|------|------|------|------|------|------|------|------|------|-------|
| 2.27 | 4.69 | 4.48 | 3.88 | 3.54 | 3.19 | 2.85 | 2.47 | 1.94 | 1.75 | 1.30 | 0.92  |
| 2.32 | 4.43 | 4.11 | 3.79 | 3.51 | 3.18 | 2.66 | 2.36 | 1.83 | 1.50 | 1.05 | 0.66  |
| 2.37 | 4.36 | 4.01 | 3.80 | 3.43 | 3.26 | 2.71 | 2.34 | 2.01 | 1.53 | 1.00 | 0.57  |
| 2.42 | 4.76 | 4.21 | 3.93 | 3.73 | 3.27 | 2.79 | 2.50 | 2.00 | 1.48 | 1.20 | 0.85  |
| 2.47 | 4.94 | 4.43 | 3.99 | 3.91 | 3.58 | 3.26 | 2.81 | 2.21 | 1.89 | 1.46 | 1.01  |
| 2.52 | 4.23 | 3.82 | 3.28 | 3.24 | 2.93 | 2.34 | 2.22 | 1.72 | 1.36 | 0.70 | 0.63  |
| 2.57 | 3.84 | 3.90 | 3.31 | 3.18 | 2.74 | 2.35 | 1.90 | 1.69 | 1.14 | 0.80 | 0.46  |
| 2.62 | 4.14 | 3.89 | 3.47 | 3.06 | 2.86 | 2.40 | 1.99 | 1.49 | 1.31 | 0.86 | 0.24  |
| 2.67 | 4.12 | 3.83 | 3.45 | 3.03 | 2.91 | 2.22 | 2.08 | 1.62 | 1.34 | 0.88 | 0.66  |
| 2.72 | 4.02 | 3.77 | 3.41 | 3.17 | 3.07 | 2.55 | 2.16 | 1.77 | 1.43 | 0.82 | 0.46  |
| 2.77 | 3.89 | 3.60 | 3.30 | 2.91 | 2.62 | 2.44 | 1.98 | 1.39 | 0.91 | 0.59 | 0.23  |
| 2.82 | 4.27 | 3.96 | 3.62 | 3.32 | 3.05 | 2.64 | 2.20 | 1.78 | 1.58 | 1.14 | 0.52  |
| 2.87 | 4.07 | 3.59 | 3.20 | 3.09 | 2.64 | 2.19 | 1.90 | 1.41 | 0.96 | 0.73 | 0.20  |
| 2.92 | 4.37 | 4.06 | 3.49 | 3.37 | 3.13 | 2.49 | 2.21 | 1.84 | 1.40 | 1.05 | 0.61  |
| 2.97 | 4.05 | 3.68 | 3.41 | 2.97 | 2.77 | 2.14 | 1.86 | 1.44 | 1.03 | 0.88 | 0.20  |
| 3.02 | 4.15 | 3.96 | 3.42 | 3.35 | 2.77 | 2.39 | 2.10 | 1.70 | 1.19 | 0.85 | 0.49  |
| 3.07 | 3.82 | 3.68 | 3.23 | 2.84 | 2.68 | 2.21 | 1.60 | 1.35 | 0.96 | 0.54 | -0.08 |
| 3.12 | 4.22 | 4.02 | 3.35 | 3.28 | 2.80 | 2.55 | 2.13 | 1.67 | 1.27 | 0.93 | 0.41  |
| 3.17 | 4.01 | 3.62 | 3.16 | 3.13 | 2.73 | 2.34 | 1.82 | 1.42 | 1.26 | 0.75 | 0.30  |
| 3.22 | 4.06 | 3.78 | 3.37 | 2.99 | 2.77 | 2.33 | 1.89 | 1.48 | 1.13 | 0.75 | 0.44  |
| 3.27 | 4.16 | 3.94 | 3.65 | 3.26 | 3.06 | 2.42 | 2.33 | 1.88 | 1.42 | 1.08 | 0.58  |
| 3.32 | 4.32 | 3.98 | 3.64 | 3.35 | 3.04 | 2.67 | 2.23 | 1.83 | 1.44 | 1.10 | 0.63  |
| 3.37 | 3.89 | 3.71 | 3.16 | 2.97 | 2.76 | 2.20 | 1.99 | 1.33 | 1.20 | 0.81 | 0.37  |
| 3.42 | 3.67 | 3.42 | 3.02 | 2.69 | 2.32 | 1.90 | 1.61 | 1.11 | 0.81 | 0.51 | 0.02  |
| 3.47 | 3.75 | 3.73 | 3.39 | 3.11 | 2.69 | 2.37 | 1.95 | 1.64 | 1.26 | 0.86 | 0.30  |
| 3.52 | 3.80 | 3.74 | 3.19 | 3.01 | 2.78 | 2.39 | 1.81 | 1.78 | 1.14 | 0.60 | 0.12  |
| 3.57 | 3.93 | 3.68 | 3.25 | 3.02 | 2.76 | 2.20 | 1.79 | 1.67 | 1.06 | 0.54 | 0.29  |
| 3.62 | 3.75 | 3.15 | 2.98 | 2.79 | 2.41 | 1.85 | 1.65 | 1.07 | 0.79 | 0.45 | 0.14  |
| 3.67 | 3.75 | 3.40 | 2.99 | 2.74 | 2.51 | 2.11 | 1.75 | 1.22 | 0.86 | 0.54 | 0.17  |
| 3.72 | 3.95 | 3.65 | 3.31 | 2.99 | 2.65 | 2.17 | 2.01 | 1.53 | 1.04 | 0.72 | 0.22  |
| 3.92 | 3.35 | 3.19 | 2.76 | 2.70 | 2.27 | 1.66 | 1.45 | 1.11 | 0.69 | 0.36 | 0.14  |
| 4.12 | 3.95 | 3.50 | 3.22 | 3.12 | 2.73 | 2.22 | 1.74 | 1.55 | 1.15 | 0.75 | 0.34  |
| 4.32 | 4.11 | 3.78 | 3.32 | 3.24 | 2.67 | 2.39 | 1.81 | 1.49 | 1.01 | 0.74 | 0.22  |
| 4.52 | 4.08 | 3.57 | 3.29 | 3.10 | 2.83 | 2.22 | 1.95 | 1.66 | 1.15 | 0.94 | 0.54  |
| 4.72 | 3.77 | 3.48 | 3.10 | 2.94 | 2.51 | 2.17 | 1.87 | 1.54 | 0.85 | 0.78 | 0.17  |
| 4.92 | 3.60 | 3.38 | 3.02 | 2.76 | 2.47 | 2.00 | 1.77 | 1.33 | 0.98 | 0.50 | 0.15  |
| 5.12 | 3.62 | 3.24 | 2.79 | 2.83 | 2.43 | 1.87 | 1.41 | 1.22 | 0.96 | 0.20 | 0.06  |
| 5.32 | 3.66 | 3.33 | 3.03 | 2.67 | 2.18 | 1.74 | 1.53 | 1.27 | 0.90 | 0.50 | -0.16 |
| 5.52 | 3.70 | 3.37 | 3.12 | 2.77 | 2.52 | 2.19 | 1.69 | 1.28 | 0.92 | 0.65 | 0.11  |
| 5.72 | 3.38 | 3.10 | 2.67 | 2.43 | 2.07 | 1.79 | 1.35 | 1.02 | 0.69 | 0.30 | -0.07 |
| 5.92 | 3.70 | 3.33 | 2.93 | 2.74 | 2.63 | 2.08 | 1.65 | 1.25 | 0.80 | 0.48 | 0.16  |
| 6.12 | 3.47 | 3.06 | 2.71 | 2.57 | 2.27 | 1.95 | 1.62 | 1.23 | 0.74 | 0.40 | 0.10  |
| 6.32 | 3.52 | 3.24 | 2.84 | 2.60 | 2.42 | 1.81 | 1.54 | 1.17 | 0.92 | 0.45 | 0.09  |
| 6.52 | 3.75 | 3.31 | 3.10 | 2.83 | 2.54 | 2.12 | 1.78 | 1.48 | 1.08 | 0.52 | 0.23  |
| 6.72 | 3.38 | 3.18 | 2.76 | 2.65 | 2.20 | 1.92 | 1.60 | 1.23 | 0.76 | 0.45 | -0.09 |
| 6.92 | 3.10 | 2.89 | 2.66 | 2.26 | 1.98 | 1.70 | 1.46 | 1.01 | 0.60 | 0.44 | -0.09 |
| 7.12 | 3.39 | 3.23 | 2.73 | 2.54 | 2.22 | 1.93 | 1.72 | 1.29 | 1.08 | 0.59 | 0.21  |
| 7.32 | 3.68 | 3.35 | 2.96 | 2.75 | 2.52 | 1.90 | 1.65 | 1.29 | 0.89 | 0.39 | 0.20  |
| 7.52 | 3.83 | 3.46 | 3.26 | 2.92 | 2.49 | 2.23 | 1.87 | 1.44 | 1.18 | 0.80 | 0.37  |
| 7.72 | 3.07 | 2.87 | 2.55 | 2.33 | 2.25 | 1.76 | 1.41 | 0.80 | 0.65 | 0.27 | -0.05 |

|       |      |      |      |      |      |      |      |      |      |      |       |
|-------|------|------|------|------|------|------|------|------|------|------|-------|
| 7.92  | 3.55 | 3.18 | 2.76 | 2.58 | 2.20 | 1.97 | 1.73 | 1.23 | 1.03 | 0.40 | 0.24  |
| 8.12  | 3.39 | 2.98 | 2.65 | 2.38 | 1.98 | 1.79 | 1.30 | 0.97 | 0.71 | 0.42 | -0.07 |
| 8.32  | 3.68 | 3.49 | 3.02 | 2.89 | 2.54 | 2.04 | 1.85 | 1.52 | 0.98 | 0.63 | 0.34  |
| 8.52  | 3.48 | 3.27 | 2.87 | 2.71 | 2.27 | 2.03 | 1.53 | 1.25 | 0.77 | 0.52 | 0.15  |
| 8.72  | 3.45 | 3.16 | 2.83 | 2.57 | 2.38 | 2.04 | 1.44 | 1.20 | 0.81 | 0.51 | 0.23  |
| 8.92  | 3.29 | 2.99 | 2.63 | 2.36 | 2.05 | 1.72 | 1.23 | 0.90 | 0.57 | 0.14 | -0.13 |
| 9.12  | 3.26 | 3.02 | 2.64 | 2.52 | 2.33 | 1.65 | 1.44 | 1.09 | 0.63 | 0.62 | -0.05 |
| 9.32  | 2.84 | 2.55 | 2.27 | 2.07 | 1.66 | 1.38 | 0.81 | 0.36 | 0.25 | 0.02 | -0.50 |
| 9.52  | 3.28 | 2.98 | 2.56 | 2.42 | 2.18 | 1.75 | 1.42 | 1.04 | 0.72 | 0.32 | 0.07  |
| 9.72  | 3.36 | 2.95 | 2.77 | 2.49 | 2.14 | 1.69 | 1.46 | 1.12 | 0.87 | 0.33 | -0.05 |
| 9.92  | 3.09 | 2.86 | 2.46 | 2.27 | 2.02 | 1.60 | 1.35 | 1.02 | 0.45 | 0.22 | -0.19 |
| 10.12 | 3.46 | 3.22 | 2.90 | 2.91 | 2.31 | 1.73 | 1.66 | 1.15 | 0.81 | 0.47 | 0.14  |
| 10.32 | 3.21 | 2.81 | 2.53 | 2.42 | 2.14 | 1.67 | 1.30 | 1.03 | 0.57 | 0.19 | 0.00  |
| 10.52 | 3.24 | 2.93 | 2.49 | 2.33 | 2.19 | 1.71 | 1.20 | 1.01 | 0.62 | 0.22 | -0.26 |
| 10.72 | 3.15 | 2.85 | 2.41 | 2.26 | 1.88 | 1.47 | 1.23 | 1.03 | 0.66 | 0.09 | -0.18 |
| 10.92 | 3.41 | 3.21 | 2.94 | 2.67 | 2.26 | 2.07 | 1.61 | 1.30 | 0.80 | 0.57 | 0.14  |
| 11.12 | 3.00 | 2.89 | 2.28 | 2.22 | 1.96 | 1.65 | 1.17 | 0.61 | 0.30 | 0.22 | -0.29 |
| 11.32 | 3.09 | 2.74 | 2.44 | 2.16 | 1.96 | 1.54 | 1.23 | 0.81 | 0.56 | 0.27 | -0.11 |
| 11.52 | 3.50 | 3.27 | 2.66 | 2.68 | 2.28 | 2.14 | 1.70 | 1.38 | 0.83 | 0.54 | 0.12  |
| 11.72 | 3.14 | 2.76 | 2.41 | 2.24 | 2.06 | 1.51 | 1.28 | 0.80 | 0.62 | 0.20 | -0.25 |
| 11.92 | 3.40 | 3.25 | 3.01 | 2.83 | 2.22 | 1.91 | 1.63 | 1.26 | 1.00 | 0.48 | 0.17  |
| 12.12 | 3.48 | 3.27 | 2.80 | 2.86 | 2.58 | 2.11 | 1.79 | 1.39 | 1.14 | 0.71 | 0.24  |
| 12.32 | 2.99 | 2.98 | 2.42 | 2.30 | 1.88 | 1.65 | 1.28 | 0.80 | 0.29 | 0.06 | -0.19 |
| 12.52 | 3.16 | 2.91 | 2.62 | 2.42 | 2.31 | 1.73 | 1.50 | 1.11 | 0.72 | 0.41 | -0.06 |
| 12.72 | 2.94 | 2.71 | 2.34 | 2.23 | 1.82 | 1.46 | 1.10 | 0.86 | 0.39 | 0.00 | -0.24 |
| 12.92 | 3.17 | 2.88 | 2.44 | 2.23 | 1.88 | 1.77 | 1.36 | 0.95 | 0.46 | 0.20 | -0.01 |
| 13.12 | 3.38 | 3.29 | 2.80 | 2.65 | 2.34 | 1.98 | 1.66 | 1.13 | 0.86 | 0.52 | 0.10  |
| 13.32 | 2.92 | 2.67 | 2.55 | 2.25 | 1.95 | 1.45 | 1.19 | 0.88 | 0.53 | 0.16 | -0.42 |
| 13.52 | 2.91 | 2.90 | 2.55 | 2.25 | 1.95 | 1.55 | 1.37 | 0.99 | 0.56 | 0.29 | -0.14 |
| 13.72 | 3.07 | 2.98 | 2.42 | 2.39 | 2.00 | 1.62 | 1.40 | 1.23 | 0.70 | 0.25 | -0.20 |
| 13.92 | 3.02 | 2.79 | 2.51 | 2.29 | 2.07 | 1.72 | 1.29 | 0.90 | 0.68 | 0.17 | -0.19 |
| 14    | 3.27 | 3.08 | 2.61 | 2.32 | 2.21 | 1.75 | 1.45 | 1.04 | 0.72 | 0.18 | -0.20 |
| 14.08 | 3.19 | 2.89 | 2.64 | 2.48 | 2.17 | 1.86 | 1.28 | 0.95 | 0.61 | 0.29 | -0.05 |
| 14.17 | 3.23 | 2.85 | 2.47 | 2.11 | 1.97 | 1.56 | 1.09 | 0.67 | 0.63 | 0.24 | -0.33 |
| 14.27 | 3.30 | 2.80 | 2.54 | 2.48 | 2.08 | 1.62 | 1.24 | 0.86 | 0.50 | 0.13 | -0.16 |
| 14.38 | 3.19 | 2.89 | 2.67 | 2.40 | 1.94 | 1.64 | 1.21 | 0.84 | 0.67 | 0.35 | -0.03 |
| 14.49 | 2.90 | 2.91 | 2.36 | 2.16 | 1.94 | 1.69 | 1.30 | 1.15 | 0.37 | 0.48 | -0.15 |
| 14.61 | 3.44 | 2.87 | 2.63 | 2.61 | 2.12 | 1.73 | 1.40 | 0.96 | 0.80 | 0.32 | 0.03  |
| 14.75 | 3.19 | 2.84 | 2.59 | 2.50 | 1.99 | 1.89 | 1.48 | 0.94 | 0.76 | 0.41 | -0.12 |
| 14.89 | 3.09 | 2.88 | 2.49 | 2.34 | 2.04 | 1.54 | 1.28 | 0.73 | 0.50 | 0.25 | -0.16 |
| 15.05 | 3.21 | 2.90 | 2.58 | 2.31 | 2.18 | 1.67 | 1.35 | 1.05 | 0.43 | 0.33 | -0.03 |
| 15.21 | 3.15 | 2.68 | 2.34 | 2.14 | 2.14 | 1.58 | 1.11 | 0.87 | 0.59 | 0.31 | -0.22 |
| 15.39 | 2.99 | 2.89 | 2.64 | 2.29 | 1.92 | 1.74 | 1.05 | 0.86 | 0.36 | 0.23 | -0.16 |
| 15.59 | 2.88 | 2.49 | 2.33 | 2.01 | 1.74 | 1.30 | 1.05 | 0.72 | 0.35 | 0.05 | -0.51 |
| 15.8  | 3.02 | 2.92 | 2.56 | 2.22 | 2.04 | 1.49 | 1.21 | 0.82 | 0.72 | 0.27 | -0.12 |
| 16.02 | 3.07 | 2.77 | 2.41 | 2.09 | 2.00 | 1.61 | 1.20 | 1.01 | 0.60 | 0.15 | -0.15 |
| 16.27 | 2.92 | 2.80 | 2.51 | 2.48 | 2.02 | 1.66 | 1.38 | 0.87 | 0.61 | 0.06 | -0.16 |
| 16.53 | 3.17 | 2.87 | 2.55 | 2.40 | 2.16 | 1.77 | 1.27 | 0.98 | 0.55 | 0.25 | -0.29 |
| 16.81 | 3.08 | 2.85 | 2.44 | 2.38 | 1.95 | 1.51 | 1.30 | 0.94 | 0.71 | 0.21 | -0.13 |
| 17.12 | 3.05 | 2.77 | 2.55 | 2.24 | 1.94 | 1.61 | 1.31 | 0.90 | 0.71 | 0.41 | -0.35 |

|        |      |      |      |      |      |      |      |      |       |       |       |
|--------|------|------|------|------|------|------|------|------|-------|-------|-------|
| 17.45  | 3.15 | 2.93 | 2.44 | 2.12 | 1.87 | 1.72 | 1.32 | 1.00 | 0.62  | 0.02  | -0.18 |
| 17.81  | 3.01 | 2.92 | 2.45 | 2.18 | 1.77 | 1.58 | 1.08 | 0.87 | 0.55  | 0.23  | -0.06 |
| 18.19  | 3.01 | 2.94 | 2.56 | 2.13 | 1.85 | 1.76 | 1.26 | 0.97 | 0.50  | 0.29  | -0.26 |
| 18.6   | 2.88 | 2.59 | 2.40 | 1.93 | 1.94 | 1.53 | 1.11 | 0.70 | 0.44  | 0.22  | -0.24 |
| 19.05  | 2.92 | 2.53 | 2.37 | 2.07 | 1.67 | 1.34 | 0.96 | 0.63 | 0.39  | -0.04 | -0.40 |
| 19.53  | 3.08 | 2.84 | 2.62 | 2.44 | 2.25 | 1.65 | 1.51 | 1.08 | 0.71  | 0.34  | 0.07  |
| 20.05  | 2.86 | 2.47 | 2.31 | 2.06 | 1.77 | 1.49 | 1.12 | 0.58 | 0.43  | 0.08  | -0.47 |
| 20.61  | 2.90 | 2.79 | 2.48 | 2.11 | 1.97 | 1.62 | 1.27 | 0.97 | 0.52  | 0.23  | -0.15 |
| 21.22  | 2.90 | 2.66 | 2.33 | 2.08 | 1.69 | 1.29 | 1.00 | 0.78 | 0.46  | -0.10 | -0.19 |
| 21.87  | 3.16 | 2.81 | 2.53 | 2.57 | 2.03 | 1.60 | 1.24 | 1.00 | 0.69  | 0.33  | -0.08 |
| 22.57  | 3.04 | 2.75 | 2.67 | 2.33 | 1.93 | 1.64 | 1.17 | 1.02 | 0.59  | 0.08  | -0.15 |
| 23.33  | 2.99 | 2.76 | 2.33 | 2.12 | 1.94 | 1.52 | 1.26 | 0.71 | 0.41  | 0.14  | -0.14 |
| 24.15  | 2.91 | 2.59 | 2.07 | 2.01 | 1.78 | 1.44 | 0.93 | 0.71 | 0.36  | -0.06 | -0.39 |
| 25.03  | 2.72 | 2.65 | 2.36 | 2.13 | 1.82 | 1.49 | 1.21 | 0.87 | 0.52  | 0.24  | -0.24 |
| 25.98  | 2.70 | 2.52 | 2.40 | 2.03 | 1.74 | 1.42 | 0.86 | 0.56 | 0.47  | 0.08  | -0.46 |
| 27.01  | 2.94 | 2.37 | 2.25 | 2.02 | 1.64 | 1.27 | 1.08 | 0.60 | 0.25  | 0.00  | -0.33 |
| 28.11  | 2.69 | 2.62 | 2.26 | 2.22 | 1.89 | 1.41 | 1.14 | 0.84 | 0.38  | 0.18  | -0.23 |
| 29.3   | 2.56 | 2.10 | 1.77 | 1.69 | 1.52 | 0.97 | 0.80 | 0.24 | -0.02 | -0.36 | -0.64 |
| 30.59  | 2.83 | 2.35 | 2.18 | 2.13 | 1.81 | 1.28 | 0.93 | 0.75 | 0.28  | 0.10  | -0.34 |
| 31.98  | 2.85 | 2.64 | 2.38 | 2.01 | 1.82 | 1.19 | 1.00 | 0.76 | 0.29  | 0.08  | -0.43 |
| 33.47  | 2.86 | 2.54 | 2.13 | 1.97 | 1.66 | 1.46 | 1.12 | 0.72 | 0.39  | 0.03  | -0.15 |
| 35.09  | 2.93 | 2.78 | 2.35 | 2.22 | 1.94 | 1.70 | 1.32 | 0.82 | 0.54  | 0.30  | -0.11 |
| 36.83  | 2.46 | 2.47 | 2.13 | 1.86 | 1.53 | 1.09 | 0.76 | 0.58 | 0.12  | -0.22 | -0.57 |
| 38.71  | 2.59 | 2.38 | 2.08 | 1.83 | 1.54 | 1.23 | 0.93 | 0.49 | 0.23  | -0.12 | -0.49 |
| 40.73  | 2.92 | 2.64 | 2.16 | 2.16 | 1.76 | 1.53 | 1.03 | 0.76 | 0.30  | -0.05 | -0.17 |
| 42.92  | 2.92 | 2.50 | 2.37 | 2.18 | 1.87 | 1.39 | 1.05 | 0.76 | 0.28  | 0.12  | -0.26 |
| 45.27  | 2.97 | 2.74 | 2.29 | 2.11 | 1.84 | 1.56 | 1.29 | 0.67 | 0.35  | -0.05 | -0.45 |
| 47.81  | 2.67 | 2.31 | 2.00 | 1.78 | 1.50 | 1.26 | 0.84 | 0.43 | 0.02  | -0.41 | -0.58 |
| 50.55  | 2.34 | 2.17 | 2.00 | 1.82 | 1.62 | 1.07 | 0.76 | 0.38 | 0.01  | -0.28 | -0.61 |
| 53.51  | 2.25 | 1.94 | 1.72 | 1.46 | 1.06 | 0.85 | 0.38 | 0.02 | -0.35 | -0.48 | -0.93 |
| 56.69  | 2.32 | 1.98 | 1.73 | 1.64 | 1.32 | 0.93 | 0.72 | 0.23 | 0.01  | -0.26 | -0.73 |
| 60.13  | 2.47 | 2.36 | 1.93 | 1.75 | 1.58 | 1.15 | 0.92 | 0.64 | 0.16  | -0.11 | -0.44 |
| 63.84  | 2.48 | 2.23 | 1.87 | 1.84 | 1.43 | 1.17 | 0.62 | 0.53 | -0.17 | -0.25 | -0.68 |
| 67.83  | 2.40 | 2.20 | 1.74 | 1.65 | 1.31 | 0.96 | 0.71 | 0.07 | -0.13 | -0.62 | -1.05 |
| 72.15  | 2.33 | 1.94 | 1.80 | 1.65 | 1.41 | 1.05 | 0.60 | 0.25 | -0.18 | -0.30 | -0.79 |
| 76.8   | 2.25 | 2.06 | 1.68 | 1.45 | 1.49 | 0.90 | 0.49 | 0.21 | -0.13 | -0.33 | -0.75 |
| 81.81  | 2.57 | 2.18 | 1.74 | 1.65 | 1.41 | 0.93 | 0.72 | 0.31 | 0.15  | -0.20 | -0.71 |
| 87.22  | 2.21 | 2.14 | 1.63 | 1.47 | 1.25 | 0.86 | 0.34 | 0.12 | -0.24 | -0.29 | -0.90 |
| 93.06  | 2.35 | 2.19 | 1.77 | 1.77 | 1.26 | 0.97 | 0.78 | 0.40 | -0.04 | -0.30 | -0.87 |
| 99.35  | 2.45 | 2.29 | 1.96 | 1.67 | 1.58 | 1.10 | 0.77 | 0.35 | 0.08  | -0.29 | -0.41 |
| 106.13 | 2.14 | 1.89 | 1.58 | 1.48 | 1.13 | 0.83 | 0.47 | 0.24 | -0.13 | -0.63 | -1.00 |
| 113.45 | 2.40 | 2.38 | 1.85 | 1.63 | 1.59 | 1.05 | 0.89 | 0.30 | -0.01 | -0.33 | -0.69 |
| 121.34 | 2.39 | 2.04 | 1.76 | 1.63 | 1.38 | 1.00 | 0.71 | 0.14 | 0.15  | -0.29 | -0.80 |
| 129.86 | 2.30 | 2.16 | 1.77 | 1.54 | 1.13 | 0.84 | 0.50 | 0.20 | -0.23 | -0.39 | -0.93 |
| 139.04 | 2.42 | 2.23 | 1.61 | 1.61 | 1.34 | 1.09 | 0.73 | 0.33 | 0.10  | -0.32 | -0.81 |
| 148.94 | 2.08 | 2.00 | 1.60 | 1.41 | 1.06 | 0.82 | 0.49 | 0.04 | -0.21 | -0.57 | -0.98 |
| 159.62 | 2.01 | 1.82 | 1.57 | 1.35 | 1.16 | 0.83 | 0.46 | 0.23 | -0.05 | -0.58 | -0.80 |
| 171.14 | 2.47 | 2.24 | 1.82 | 1.78 | 1.46 | 1.10 | 0.83 | 0.28 | 0.26  | -0.13 | -0.66 |
| 183.56 | 2.14 | 1.85 | 1.53 | 1.33 | 0.85 | 0.69 | 0.56 | 0.15 | -0.33 | -0.57 | -0.94 |
| 196.96 | 1.98 | 1.92 | 1.60 | 1.43 | 1.22 | 1.02 | 0.53 | 0.24 | -0.28 | -0.39 | -0.70 |

|         |      |      |      |      |      |      |       |       |       |       |       |
|---------|------|------|------|------|------|------|-------|-------|-------|-------|-------|
| 211.41  | 2.25 | 2.26 | 1.85 | 1.44 | 1.14 | 0.87 | 0.43  | 0.25  | -0.08 | -0.39 | -0.62 |
| 226.99  | 2.24 | 2.12 | 1.64 | 1.52 | 1.38 | 0.88 | 0.67  | 0.12  | -0.01 | -0.38 | -0.84 |
| 243.8   | 1.95 | 1.95 | 1.54 | 1.33 | 1.07 | 0.70 | 0.34  | 0.00  | -0.26 | -0.41 | -0.91 |
| 261.93  | 1.96 | 1.81 | 1.47 | 1.20 | 1.08 | 0.81 | 0.35  | 0.07  | -0.35 | -0.54 | -1.04 |
| 281.48  | 2.25 | 2.11 | 1.82 | 1.74 | 1.54 | 0.98 | 0.59  | 0.22  | -0.03 | -0.46 | -0.63 |
| 302.56  | 2.05 | 1.83 | 1.62 | 1.55 | 1.26 | 0.93 | 0.61  | 0.34  | -0.12 | -0.54 | -0.78 |
| 325.3   | 1.99 | 1.90 | 1.38 | 1.26 | 1.23 | 0.66 | 0.34  | -0.02 | -0.42 | -0.58 | -0.91 |
| 349.83  | 1.96 | 1.77 | 1.41 | 1.27 | 0.97 | 0.69 | 0.30  | 0.07  | -0.07 | -0.48 | -0.95 |
| 376.28  | 2.08 | 1.85 | 1.54 | 1.39 | 1.20 | 0.76 | 0.52  | 0.08  | -0.32 | -0.57 | -0.94 |
| 404.81  | 2.22 | 1.96 | 1.77 | 1.54 | 1.39 | 1.02 | 0.56  | 0.48  | 0.07  | -0.31 | -0.56 |
| 435.58  | 1.86 | 1.63 | 1.19 | 1.13 | 0.94 | 0.54 | 0.14  | -0.22 | -0.28 | -0.74 | -0.91 |
| 468.76  | 2.12 | 1.90 | 1.46 | 1.43 | 1.26 | 0.90 | 0.66  | 0.23  | -0.11 | -0.25 | -0.81 |
| 504.55  | 1.95 | 1.97 | 1.63 | 1.42 | 1.28 | 0.81 | 0.53  | 0.36  | -0.07 | -0.36 | -0.72 |
| 543.15  | 1.97 | 1.64 | 1.45 | 1.21 | 1.12 | 0.59 | 0.42  | -0.06 | -0.22 | -0.48 | -0.94 |
| 584.78  | 1.77 | 1.79 | 1.42 | 1.27 | 0.95 | 0.75 | 0.35  | 0.19  | -0.31 | -0.48 | -0.76 |
| 629.68  | 2.08 | 1.67 | 1.53 | 1.32 | 1.10 | 0.83 | 0.45  | 0.25  | -0.03 | -0.44 | -0.73 |
| 678.1   | 2.11 | 1.93 | 1.67 | 1.55 | 1.36 | 1.02 | 0.76  | 0.57  | 0.16  | -0.22 | -0.35 |
| 730.33  | 2.05 | 1.84 | 1.58 | 1.35 | 1.07 | 0.86 | 0.49  | 0.11  | -0.10 | -0.33 | -0.56 |
| 786.65  | 1.81 | 1.80 | 1.53 | 1.38 | 1.00 | 0.52 | 0.63  | 0.10  | -0.09 | -0.43 | -0.72 |
| 847.4   | 1.69 | 1.51 | 1.35 | 1.04 | 0.92 | 0.64 | 0.31  | -0.09 | -0.45 | -0.60 | -1.06 |
| 912.92  | 1.94 | 1.62 | 1.51 | 1.33 | 1.22 | 0.83 | 0.47  | 0.16  | -0.20 | -0.55 | -0.81 |
| 983.58  | 1.91 | 1.57 | 1.42 | 1.36 | 1.09 | 0.73 | 0.34  | 0.16  | -0.13 | -0.44 | -0.64 |
| 1059.78 | 2.09 | 1.78 | 1.75 | 1.40 | 1.24 | 1.06 | 0.63  | 0.23  | -0.10 | -0.36 | -0.47 |
| 1141.98 | 1.99 | 1.88 | 1.53 | 1.32 | 1.00 | 0.75 | 0.36  | 0.30  | 0.11  | -0.09 | -0.41 |
| 1230.62 | 1.67 | 1.38 | 1.37 | 1.14 | 0.85 | 0.45 | 0.07  | 0.06  | -0.38 | -0.61 | -0.82 |
| 1326.23 | 1.78 | 1.75 | 1.33 | 1.24 | 1.11 | 0.66 | 0.44  | 0.06  | -0.16 | -0.48 | -0.90 |
| 1429.34 | 2.05 | 1.88 | 1.51 | 1.41 | 1.12 | 0.81 | 0.63  | 0.23  | -0.04 | -0.42 | -0.57 |
| 1540.54 | 1.64 | 1.33 | 1.24 | 1.08 | 0.93 | 0.40 | 0.21  | -0.20 | -0.41 | -0.59 | -0.93 |
| 1660.48 | 1.91 | 1.81 | 1.33 | 1.32 | 1.15 | 0.67 | 0.27  | 0.22  | -0.13 | -0.42 | -0.81 |
| 1789.83 | 1.45 | 1.10 | 0.87 | 0.74 | 0.56 | 0.44 | -0.07 | -0.31 | -0.63 | -0.89 | -1.31 |
| 1929.34 | 1.82 | 1.64 | 1.49 | 1.22 | 0.91 | 0.79 | 0.48  | 0.04  | -0.28 | -0.50 | -0.75 |
| 2079.8  | 1.29 | 1.36 | 1.05 | 0.90 | 0.54 | 0.51 | 0.14  | -0.36 | -0.56 | -0.75 | -1.14 |
| 2242.08 | 1.64 | 1.42 | 1.25 | 1.00 | 0.76 | 0.49 | 0.21  | -0.14 | -0.39 | -0.57 | -0.99 |
| 2417.1  | 1.79 | 1.58 | 1.43 | 1.33 | 1.04 | 0.56 | 0.42  | 0.05  | -0.17 | -0.44 | -0.95 |
| 2605.85 | 1.32 | 1.22 | 0.95 | 0.96 | 0.58 | 0.21 | -0.05 | -0.27 | -0.63 | -0.84 | -1.28 |
| 2809.43 | 1.55 | 1.35 | 0.91 | 1.06 | 0.73 | 0.32 | -0.01 | -0.24 | -0.51 | -0.79 | -1.16 |
| 3028.99 | 1.73 | 1.61 | 1.28 | 1.05 | 0.92 | 0.63 | 0.40  | -0.14 | -0.13 | -0.69 | -0.83 |
| 3265.79 | 1.42 | 1.25 | 0.90 | 1.05 | 0.59 | 0.24 | 0.14  | -0.23 | -0.65 | -0.73 | -1.28 |
| 3521.18 | 1.41 | 1.28 | 0.73 | 0.77 | 0.62 | 0.22 | -0.20 | -0.49 | -0.72 | -0.85 | -1.52 |
| 3796.62 | 1.43 | 0.95 | 0.70 | 0.81 | 0.41 | 0.05 | -0.10 | -0.56 | -0.85 | -0.92 | -1.33 |

| Wavelength<br>(nm) | 460.15 | 461.56 | 462.97 | 464.38 | 465.78 | 467.19 | 468.60 | 470.01 | 471.42 | 472.83 | 474.24 |
|--------------------|--------|--------|--------|--------|--------|--------|--------|--------|--------|--------|--------|
| -3.28              | 0.27   | 0.14   | 0.20   | 0.12   | 0.05   | 0.31   | 0.11   | 0.21   | 0.13   | 0.09   | 0.22   |
| -2.78              | 0.04   | 0.11   | 0.14   | 0.05   | -0.05  | -0.05  | 0.05   | 0.02   | 0.21   | 0.09   | 0.00   |
| -2.28              | -0.13  | -0.08  | -0.05  | 0.03   | 0.01   | -0.07  | -0.09  | 0.01   | -0.10  | -0.06  | -0.10  |
| -1.78              | 0.11   | 0.11   | -0.07  | 0.02   | 0.04   | -0.04  | 0.05   | 0.11   | 0.04   | 0.02   | -0.01  |
| -1.28              | -0.10  | -0.15  | -0.22  | -0.25  | -0.12  | -0.14  | -0.19  | -0.22  | -0.15  | -0.30  | -0.23  |

|       |       |       |       |       |       |       |       |       |       |       |       |
|-------|-------|-------|-------|-------|-------|-------|-------|-------|-------|-------|-------|
| -0.78 | -0.02 | 0.06  | 0.01  | 0.09  | -0.10 | 0.07  | 0.04  | -0.09 | 0.04  | 0.07  | 0.04  |
| -0.28 | -0.30 | -0.26 | -0.22 | -0.16 | -0.10 | -0.20 | -0.20 | -0.27 | -0.28 | -0.19 | -0.09 |
| 0.22  | 0.14  | 0.07  | 0.20  | 0.11  | 0.28  | 0.13  | 0.25  | 0.23  | 0.11  | 0.27  | 0.17  |
| 0.32  | 0.13  | 0.09  | 0.29  | 0.16  | 0.14  | 0.18  | 0.17  | 0.08  | 0.37  | 0.16  | 0.17  |
| 0.42  | -0.24 | -0.09 | -0.24 | -0.26 | -0.39 | 0.04  | -0.21 | -0.08 | -0.23 | -0.32 | -0.06 |
| 0.52  | -0.23 | -0.14 | -0.34 | -0.37 | -0.22 | -0.36 | -0.21 | -0.31 | -0.28 | -0.33 | -0.24 |
| 0.62  | 0.07  | 0.23  | -0.03 | 0.06  | -0.03 | 0.19  | 0.36  | 0.12  | 0.16  | 0.17  | 0.02  |
| 0.72  | -0.46 | -0.11 | -0.10 | -0.21 | -0.06 | -0.23 | -0.13 | -0.21 | -0.04 | -0.29 | -0.16 |
| 0.77  | 0.22  | 0.23  | 0.21  | 0.18  | 0.08  | 0.25  | 0.15  | 0.24  | 0.26  | 0.22  | 0.31  |
| 0.82  | 0.02  | 0.16  | 0.27  | 0.20  | 0.17  | 0.24  | 0.30  | 0.21  | 0.09  | 0.30  | 0.29  |
| 0.87  | -0.02 | 0.26  | 0.02  | 0.03  | 0.07  | -0.04 | -0.02 | -0.07 | 0.12  | -0.10 | -0.02 |
| 0.92  | 0.02  | 0.02  | -0.04 | -0.09 | -0.03 | -0.07 | 0.00  | -0.04 | -0.07 | 0.03  | 0.08  |
| 0.97  | -0.14 | -0.24 | -0.23 | -0.21 | -0.12 | -0.13 | -0.01 | -0.26 | -0.23 | -0.03 | -0.16 |
| 1.02  | -0.07 | 0.04  | -0.03 | -0.03 | -0.30 | -0.25 | -0.05 | 0.06  | 0.02  | -0.05 | -0.07 |
| 1.07  | 0.14  | 0.27  | 0.20  | 0.12  | 0.14  | 0.13  | -0.03 | 0.07  | 0.33  | 0.14  | 0.05  |
| 1.12  | 0.21  | -0.03 | 0.02  | -0.10 | -0.20 | -0.11 | -0.11 | 0.00  | -0.22 | -0.16 | -0.08 |
| 1.17  | -0.33 | -0.20 | -0.34 | -0.30 | -0.29 | -0.28 | -0.33 | -0.19 | -0.20 | -0.15 | -0.13 |
| 1.22  | -0.67 | -0.47 | -0.49 | -0.42 | -0.53 | -0.43 | -0.55 | -0.47 | -0.38 | -0.30 | -0.15 |
| 1.27  | 2.04  | 1.82  | 1.26  | 1.08  | 0.56  | 0.26  | 0.05  | -0.19 | -0.41 | -0.67 | -0.79 |
| 1.32  | 4.79  | 4.16  | 3.82  | 3.45  | 2.86  | 2.73  | 2.21  | 1.82  | 1.49  | 0.95  | 0.85  |
| 1.37  | 7.30  | 7.30  | 7.13  | 6.95  | 6.49  | 6.49  | 6.16  | 5.70  | 5.45  | 5.06  | 4.35  |
| 1.42  | 2.79  | 2.66  | 2.00  | 1.72  | 1.20  | 1.02  | 0.66  | 0.44  | 0.22  | -0.15 | -0.33 |
| 1.47  | 1.78  | 1.49  | 0.87  | 0.30  | -0.45 | -0.89 | -1.50 | -1.99 | -2.67 | -3.22 | -3.91 |
| 1.52  | 1.27  | 0.66  | 0.04  | -0.48 | -1.05 | -1.59 | -2.36 | -2.86 | -3.50 | -4.16 | -4.90 |
| 1.57  | 0.81  | 0.49  | -0.34 | -0.88 | -1.35 | -1.96 | -2.50 | -3.09 | -3.89 | -4.69 | -5.33 |
| 1.62  | 1.19  | 0.57  | 0.02  | -0.37 | -1.26 | -1.66 | -2.14 | -2.97 | -3.61 | -4.26 | -5.10 |
| 1.67  | 0.74  | 0.30  | -0.33 | -0.85 | -1.56 | -1.87 | -2.38 | -3.13 | -3.68 | -4.24 | -4.93 |
| 1.72  | 0.57  | -0.03 | -0.42 | -0.94 | -1.23 | -1.80 | -2.34 | -3.01 | -3.50 | -4.06 | -4.68 |
| 1.77  | 0.34  | 0.00  | -0.31 | -0.84 | -1.54 | -1.92 | -2.42 | -3.08 | -3.44 | -4.05 | -4.68 |
| 1.82  | 0.62  | 0.19  | -0.31 | -0.62 | -1.51 | -1.88 | -2.30 | -2.92 | -3.42 | -3.94 | -4.44 |
| 1.87  | 0.75  | 0.11  | -0.23 | -0.85 | -1.38 | -1.75 | -2.40 | -2.77 | -3.32 | -4.02 | -4.27 |
| 1.92  | 0.61  | 0.26  | -0.11 | -0.63 | -1.16 | -1.60 | -2.06 | -2.70 | -3.01 | -3.57 | -4.29 |
| 1.97  | 0.54  | 0.02  | -0.26 | -0.86 | -1.45 | -1.74 | -2.14 | -2.79 | -3.19 | -3.75 | -4.34 |
| 2.02  | 0.56  | 0.11  | -0.45 | -0.86 | -1.48 | -1.82 | -2.27 | -2.66 | -2.95 | -3.61 | -4.12 |
| 2.07  | 0.41  | -0.02 | -0.29 | -0.98 | -1.33 | -1.75 | -2.23 | -2.58 | -3.14 | -3.72 | -4.23 |
| 2.12  | 0.43  | -0.06 | -0.52 | -0.90 | -1.46 | -1.86 | -2.36 | -2.63 | -3.06 | -3.82 | -4.10 |
| 2.17  | 0.53  | 0.12  | -0.14 | -0.62 | -1.26 | -1.54 | -2.13 | -2.41 | -2.92 | -3.51 | -3.89 |
| 2.22  | 0.69  | -0.06 | -0.16 | -0.76 | -1.17 | -1.59 | -2.05 | -2.47 | -2.85 | -3.58 | -3.95 |
| 2.27  | 0.52  | 0.07  | -0.31 | -0.84 | -1.31 | -1.64 | -2.11 | -2.57 | -2.94 | -3.38 | -3.84 |
| 2.32  | 0.17  | -0.11 | -0.49 | -1.09 | -1.44 | -1.87 | -2.27 | -2.78 | -3.20 | -3.67 | -4.29 |
| 2.37  | 0.33  | -0.08 | -0.49 | -0.89 | -1.36 | -1.83 | -2.29 | -2.57 | -2.96 | -3.62 | -4.12 |
| 2.42  | 0.53  | 0.10  | -0.23 | -0.68 | -1.13 | -1.75 | -2.17 | -2.45 | -3.02 | -3.56 | -3.94 |
| 2.47  | 0.53  | 0.35  | -0.10 | -0.68 | -1.06 | -1.45 | -1.87 | -2.37 | -2.82 | -3.17 | -3.84 |
| 2.52  | 0.33  | -0.14 | -0.64 | -0.90 | -1.43 | -1.80 | -2.06 | -2.65 | -3.29 | -3.56 | -4.05 |
| 2.57  | 0.09  | -0.24 | -0.64 | -1.16 | -1.73 | -2.09 | -2.47 | -2.79 | -3.19 | -3.71 | -4.15 |
| 2.62  | 0.03  | -0.33 | -0.71 | -1.45 | -1.63 | -2.02 | -2.50 | -2.89 | -3.55 | -3.91 | -4.40 |
| 2.67  | 0.20  | -0.35 | -0.59 | -0.98 | -1.48 | -1.92 | -2.45 | -2.79 | -3.22 | -3.79 | -4.16 |
| 2.72  | 0.10  | -0.02 | -0.68 | -1.08 | -1.31 | -1.78 | -2.27 | -2.59 | -3.16 | -3.43 | -3.90 |
| 2.77  | -0.15 | -0.68 | -0.88 | -1.40 | -1.84 | -2.27 | -2.63 | -3.10 | -3.54 | -4.01 | -4.51 |
| 2.82  | 0.30  | -0.01 | -0.32 | -0.86 | -1.33 | -1.76 | -2.19 | -2.58 | -2.89 | -3.47 | -3.85 |

|       |       |       |       |       |       |       |       |       |       |       |       |
|-------|-------|-------|-------|-------|-------|-------|-------|-------|-------|-------|-------|
| 2.87  | -0.27 | -0.52 | -0.93 | -1.21 | -1.77 | -2.04 | -2.54 | -2.73 | -3.43 | -3.69 | -4.23 |
| 2.92  | 0.25  | -0.18 | -0.48 | -1.03 | -1.42 | -1.83 | -2.24 | -2.52 | -3.28 | -3.57 | -4.02 |
| 2.97  | -0.23 | -0.39 | -0.87 | -1.41 | -1.96 | -2.19 | -2.50 | -2.95 | -3.40 | -3.94 | -4.53 |
| 3.02  | -0.09 | -0.36 | -0.78 | -1.21 | -1.63 | -1.94 | -2.32 | -2.90 | -3.24 | -3.76 | -4.18 |
| 3.07  | -0.06 | -0.59 | -0.84 | -1.20 | -1.72 | -2.02 | -2.38 | -2.83 | -3.42 | -3.69 | -4.25 |
| 3.12  | -0.07 | -0.26 | -0.60 | -1.27 | -1.52 | -1.96 | -2.47 | -2.88 | -3.22 | -3.66 | -4.22 |
| 3.17  | 0.02  | -0.30 | -0.89 | -1.09 | -1.78 | -2.10 | -2.48 | -2.84 | -3.38 | -3.94 | -4.32 |
| 3.22  | 0.01  | -0.41 | -0.84 | -1.16 | -1.63 | -2.10 | -2.49 | -2.72 | -3.28 | -3.79 | -4.21 |
| 3.27  | 0.21  | -0.10 | -0.58 | -1.01 | -1.48 | -1.88 | -2.01 | -2.58 | -3.10 | -3.61 | -4.08 |
| 3.32  | 0.40  | -0.14 | -0.17 | -0.89 | -1.42 | -1.66 | -1.97 | -2.39 | -2.80 | -3.39 | -4.00 |
| 3.37  | -0.07 | -0.22 | -0.65 | -1.25 | -1.84 | -2.09 | -2.34 | -2.77 | -3.35 | -3.73 | -4.21 |
| 3.42  | -0.40 | -0.71 | -1.01 | -1.52 | -1.90 | -2.25 | -2.74 | -3.10 | -3.55 | -3.98 | -4.43 |
| 3.47  | -0.02 | -0.45 | -0.73 | -1.12 | -1.71 | -2.05 | -2.40 | -3.00 | -3.17 | -3.76 | -3.93 |
| 3.52  | -0.19 | -0.69 | -0.87 | -1.30 | -1.77 | -2.14 | -2.46 | -3.10 | -3.09 | -3.75 | -4.21 |
| 3.57  | -0.12 | -0.58 | -1.03 | -1.32 | -1.73 | -2.08 | -2.64 | -2.88 | -3.55 | -3.89 | -4.30 |
| 3.62  | -0.25 | -0.59 | -1.04 | -1.35 | -1.87 | -2.35 | -2.66 | -3.16 | -3.56 | -4.05 | -4.33 |
| 3.67  | -0.33 | -0.58 | -0.98 | -1.46 | -1.73 | -2.14 | -2.59 | -3.06 | -3.37 | -3.98 | -4.33 |
| 3.72  | -0.09 | -0.38 | -0.74 | -1.16 | -1.66 | -2.02 | -2.41 | -2.69 | -3.16 | -3.59 | -4.17 |
| 3.92  | -0.34 | -0.66 | -0.95 | -1.32 | -1.88 | -2.10 | -2.43 | -2.92 | -3.24 | -3.71 | -4.16 |
| 4.12  | -0.01 | -0.29 | -0.75 | -1.07 | -1.74 | -2.03 | -2.52 | -2.85 | -3.09 | -3.75 | -4.10 |
| 4.32  | 0.25  | -0.60 | -0.88 | -1.22 | -1.75 | -2.00 | -2.39 | -3.02 | -3.36 | -3.77 | -4.34 |
| 4.52  | 0.03  | -0.31 | -0.77 | -1.30 | -1.52 | -1.97 | -2.26 | -2.77 | -3.06 | -3.55 | -4.03 |
| 4.72  | -0.10 | -0.38 | -0.88 | -1.15 | -1.63 | -2.14 | -2.56 | -2.70 | -3.27 | -3.75 | -4.16 |
| 4.92  | -0.20 | -0.53 | -0.94 | -1.26 | -1.76 | -2.18 | -2.65 | -3.08 | -3.47 | -3.75 | -4.40 |
| 5.12  | -0.33 | -0.74 | -0.89 | -1.51 | -1.99 | -2.25 | -2.66 | -3.09 | -3.40 | -4.08 | -4.33 |
| 5.32  | -0.51 | -0.53 | -1.01 | -1.44 | -1.78 | -2.31 | -2.78 | -3.19 | -3.61 | -4.06 | -4.45 |
| 5.52  | -0.10 | -0.45 | -0.88 | -1.28 | -1.81 | -2.19 | -2.42 | -2.82 | -3.42 | -3.74 | -4.21 |
| 5.72  | -0.49 | -0.95 | -1.17 | -1.69 | -2.05 | -2.53 | -2.87 | -3.29 | -3.93 | -4.26 | -4.66 |
| 5.92  | -0.25 | -0.65 | -0.90 | -1.40 | -1.87 | -2.05 | -2.54 | -2.92 | -3.19 | -3.72 | -4.29 |
| 6.12  | -0.38 | -0.59 | -1.02 | -1.40 | -1.91 | -2.33 | -2.81 | -3.09 | -3.37 | -4.14 | -4.29 |
| 6.32  | -0.19 | -0.59 | -0.96 | -1.34 | -1.87 | -2.27 | -2.67 | -3.04 | -3.46 | -3.95 | -4.13 |
| 6.52  | -0.03 | -0.43 | -0.83 | -1.26 | -1.65 | -1.94 | -2.68 | -2.91 | -3.29 | -3.78 | -4.06 |
| 6.72  | -0.18 | -0.69 | -1.01 | -1.43 | -1.89 | -2.33 | -2.58 | -3.02 | -3.57 | -3.90 | -4.38 |
| 6.92  | -0.47 | -0.63 | -0.95 | -1.48 | -1.94 | -2.37 | -2.76 | -3.02 | -3.44 | -3.79 | -4.22 |
| 7.12  | -0.09 | -0.58 | -0.83 | -1.21 | -1.62 | -1.91 | -2.25 | -2.93 | -3.12 | -3.66 | -4.11 |
| 7.32  | -0.23 | -0.49 | -0.91 | -1.26 | -1.85 | -2.25 | -2.62 | -2.88 | -3.12 | -3.94 | -4.28 |
| 7.52  | -0.04 | -0.38 | -0.82 | -1.29 | -1.62 | -2.08 | -2.38 | -2.92 | -3.21 | -3.63 | -4.13 |
| 7.72  | -0.58 | -0.66 | -1.21 | -1.69 | -2.04 | -2.49 | -2.72 | -3.23 | -3.64 | -3.95 | -4.48 |
| 7.92  | -0.33 | -0.56 | -0.81 | -1.33 | -2.05 | -2.21 | -2.65 | -3.03 | -3.33 | -3.91 | -4.37 |
| 8.12  | -0.38 | -0.76 | -1.01 | -1.74 | -2.00 | -2.24 | -2.56 | -3.09 | -3.29 | -4.02 | -4.36 |
| 8.32  | -0.16 | -0.50 | -0.90 | -1.17 | -1.61 | -1.96 | -2.58 | -2.92 | -3.38 | -3.73 | -4.21 |
| 8.52  | -0.23 | -0.68 | -0.92 | -1.38 | -1.79 | -2.22 | -2.54 | -2.91 | -3.56 | -3.80 | -4.29 |
| 8.72  | -0.22 | -0.61 | -0.93 | -1.39 | -1.92 | -2.28 | -2.56 | -2.87 | -3.55 | -3.86 | -4.27 |
| 8.92  | -0.56 | -1.01 | -1.20 | -1.69 | -2.02 | -2.47 | -2.86 | -3.41 | -3.72 | -4.26 | -4.68 |
| 9.12  | -0.52 | -0.59 | -1.24 | -1.66 | -2.07 | -2.21 | -2.65 | -3.14 | -3.50 | -3.93 | -4.44 |
| 9.32  | -0.86 | -1.18 | -1.68 | -1.88 | -2.42 | -2.69 | -3.02 | -3.50 | -3.93 | -4.36 | -4.67 |
| 9.52  | -0.54 | -0.74 | -1.22 | -1.43 | -1.99 | -2.36 | -2.83 | -3.24 | -3.51 | -3.92 | -4.58 |
| 9.72  | -0.47 | -0.73 | -0.86 | -1.63 | -2.01 | -2.31 | -2.64 | -3.29 | -3.63 | -4.01 | -4.52 |
| 9.92  | -0.40 | -0.89 | -1.06 | -1.60 | -2.01 | -2.36 | -2.71 | -3.24 | -3.59 | -4.07 | -4.52 |
| 10.12 | -0.16 | -0.59 | -0.86 | -1.26 | -1.79 | -2.14 | -2.49 | -2.91 | -3.35 | -3.64 | -4.07 |

|       |       |       |       |       |       |       |       |       |       |       |       |
|-------|-------|-------|-------|-------|-------|-------|-------|-------|-------|-------|-------|
| 10.32 | -0.35 | -0.69 | -1.09 | -1.55 | -1.89 | -2.29 | -2.63 | -3.17 | -3.55 | -3.92 | -4.27 |
| 10.52 | -0.47 | -0.65 | -1.14 | -1.64 | -2.15 | -2.47 | -2.77 | -3.16 | -3.42 | -3.87 | -4.33 |
| 10.72 | -0.65 | -0.82 | -1.22 | -1.59 | -2.10 | -2.51 | -2.68 | -2.90 | -3.42 | -4.03 | -4.34 |
| 10.92 | -0.43 | -0.51 | -0.98 | -1.51 | -1.68 | -2.27 | -2.75 | -2.94 | -3.31 | -3.94 | -4.18 |
| 11.12 | -0.50 | -0.94 | -1.44 | -1.72 | -2.20 | -2.46 | -2.86 | -3.27 | -3.76 | -4.25 | -4.38 |
| 11.32 | -0.49 | -0.91 | -1.19 | -1.72 | -2.16 | -2.44 | -2.95 | -3.11 | -3.55 | -4.16 | -4.49 |
| 11.52 | -0.31 | -0.55 | -1.05 | -1.26 | -1.77 | -2.16 | -2.43 | -2.72 | -3.20 | -3.67 | -3.97 |
| 11.72 | -0.39 | -0.96 | -1.22 | -1.77 | -1.94 | -2.32 | -2.66 | -3.15 | -3.58 | -3.96 | -4.52 |
| 11.92 | -0.25 | -0.51 | -0.87 | -1.15 | -1.57 | -1.95 | -2.30 | -2.68 | -3.31 | -3.64 | -4.06 |
| 12.12 | 0.13  | -0.42 | -0.76 | -0.91 | -1.47 | -1.78 | -2.10 | -2.51 | -2.83 | -3.48 | -3.77 |
| 12.32 | -0.55 | -0.94 | -1.36 | -1.70 | -2.00 | -2.58 | -2.91 | -3.39 | -3.79 | -4.16 | -4.25 |
| 12.52 | -0.35 | -0.61 | -1.05 | -1.43 | -1.93 | -2.20 | -2.65 | -3.08 | -3.32 | -3.97 | -4.22 |
| 12.72 | -0.80 | -1.18 | -1.29 | -1.84 | -2.12 | -2.56 | -2.88 | -3.47 | -3.73 | -4.34 | -4.59 |
| 12.92 | -0.58 | -0.86 | -1.07 | -1.60 | -2.04 | -2.51 | -2.78 | -3.17 | -3.69 | -4.12 | -4.39 |
| 13.12 | -0.35 | -0.58 | -0.86 | -1.40 | -1.84 | -2.35 | -2.46 | -3.05 | -3.27 | -3.70 | -4.03 |
| 13.32 | -0.69 | -0.87 | -1.35 | -1.82 | -2.23 | -2.45 | -2.68 | -3.47 | -3.70 | -4.20 | -4.47 |
| 13.52 | -0.42 | -0.85 | -1.13 | -1.71 | -1.97 | -2.38 | -2.84 | -3.15 | -3.61 | -4.05 | -4.39 |
| 13.72 | -0.29 | -0.74 | -1.09 | -1.47 | -1.92 | -2.31 | -2.54 | -3.13 | -3.32 | -3.84 | -4.10 |
| 13.92 | -0.58 | -0.96 | -1.34 | -1.71 | -1.94 | -2.39 | -2.82 | -3.37 | -3.57 | -4.04 | -4.67 |
| 14    | -0.40 | -0.72 | -1.22 | -1.67 | -2.06 | -2.40 | -2.62 | -3.08 | -3.59 | -4.10 | -4.55 |
| 14.08 | -0.37 | -0.83 | -1.10 | -1.50 | -1.87 | -2.48 | -2.60 | -3.15 | -3.38 | -4.10 | -4.30 |
| 14.17 | -0.50 | -0.90 | -1.11 | -1.65 | -2.14 | -2.29 | -2.69 | -3.08 | -3.52 | -3.59 | -4.12 |
| 14.27 | -0.50 | -0.96 | -1.19 | -1.70 | -2.09 | -2.66 | -2.74 | -3.22 | -3.58 | -3.98 | -4.47 |
| 14.38 | -0.56 | -0.91 | -1.16 | -1.47 | -2.05 | -2.35 | -2.83 | -3.21 | -3.53 | -4.02 | -4.34 |
| 14.49 | -0.47 | -0.90 | -1.37 | -1.56 | -1.85 | -2.42 | -2.65 | -3.10 | -3.52 | -3.93 | -4.46 |
| 14.61 | -0.49 | -0.78 | -1.27 | -1.58 | -1.89 | -2.58 | -2.79 | -3.11 | -3.53 | -3.86 | -4.27 |
| 14.75 | -0.40 | -0.90 | -0.88 | -1.34 | -1.89 | -2.29 | -2.73 | -3.14 | -3.43 | -3.96 | -4.33 |
| 14.89 | -0.53 | -0.76 | -1.22 | -1.68 | -1.98 | -2.40 | -2.81 | -3.28 | -3.56 | -4.10 | -4.27 |
| 15.05 | -0.54 | -0.72 | -1.19 | -1.42 | -2.02 | -2.36 | -2.77 | -3.15 | -3.60 | -3.96 | -4.34 |
| 15.21 | -0.53 | -0.85 | -0.95 | -1.70 | -2.07 | -2.46 | -2.90 | -3.11 | -3.61 | -3.95 | -4.45 |
| 15.39 | -0.71 | -1.05 | -1.16 | -1.75 | -1.95 | -2.36 | -2.78 | -3.13 | -3.55 | -3.97 | -4.41 |
| 15.59 | -0.60 | -1.15 | -1.60 | -1.97 | -2.27 | -2.68 | -3.07 | -3.47 | -3.79 | -4.28 | -4.60 |
| 15.8  | -0.45 | -0.98 | -1.38 | -1.58 | -1.98 | -2.24 | -2.91 | -3.07 | -3.59 | -3.78 | -4.38 |
| 16.02 | -0.41 | -0.90 | -1.17 | -1.67 | -1.95 | -2.43 | -2.73 | -3.17 | -3.53 | -3.81 | -4.21 |
| 16.27 | -0.44 | -0.69 | -1.28 | -1.67 | -2.10 | -2.30 | -2.67 | -3.15 | -3.53 | -4.07 | -4.42 |
| 16.53 | -0.55 | -0.66 | -1.20 | -1.50 | -1.95 | -2.23 | -2.58 | -3.08 | -3.42 | -3.82 | -4.30 |
| 16.81 | -0.66 | -0.85 | -1.14 | -1.59 | -1.81 | -2.28 | -2.73 | -3.09 | -3.61 | -3.95 | -4.48 |
| 17.12 | -0.49 | -0.86 | -1.31 | -1.59 | -1.90 | -2.41 | -2.73 | -3.09 | -3.60 | -4.02 | -4.43 |
| 17.45 | -0.59 | -0.85 | -1.26 | -1.79 | -2.20 | -2.42 | -2.85 | -3.13 | -3.56 | -3.96 | -4.51 |
| 17.81 | -0.42 | -0.86 | -1.35 | -1.70 | -2.08 | -2.21 | -2.69 | -3.23 | -3.73 | -4.03 | -4.50 |
| 18.19 | -0.58 | -0.87 | -1.21 | -1.56 | -1.96 | -2.35 | -2.60 | -3.07 | -3.56 | -4.03 | -4.32 |
| 18.6  | -0.38 | -0.93 | -1.28 | -1.89 | -1.92 | -2.49 | -2.78 | -3.25 | -3.80 | -3.87 | -4.29 |
| 19.05 | -0.88 | -1.17 | -1.59 | -1.99 | -2.34 | -2.65 | -2.98 | -3.40 | -3.86 | -4.21 | -4.62 |
| 19.53 | -0.35 | -0.53 | -0.97 | -1.56 | -1.89 | -2.24 | -2.63 | -3.05 | -3.30 | -3.80 | -4.11 |
| 20.05 | -0.78 | -1.16 | -1.42 | -1.94 | -2.21 | -2.55 | -3.00 | -3.38 | -3.55 | -4.01 | -4.52 |
| 20.61 | -0.63 | -0.86 | -1.16 | -1.79 | -2.05 | -2.46 | -2.85 | -3.22 | -3.51 | -4.09 | -4.36 |
| 21.22 | -0.63 | -0.99 | -1.40 | -1.90 | -2.17 | -2.48 | -2.92 | -3.27 | -3.55 | -4.26 | -4.52 |
| 21.87 | -0.37 | -0.80 | -1.18 | -1.62 | -1.96 | -2.37 | -2.54 | -3.12 | -3.58 | -3.90 | -4.38 |
| 22.57 | -0.60 | -0.88 | -1.29 | -1.57 | -2.23 | -2.38 | -2.90 | -3.23 | -3.53 | -3.97 | -4.40 |
| 23.33 | -0.62 | -0.92 | -1.39 | -1.64 | -2.04 | -2.46 | -2.60 | -3.28 | -3.53 | -3.74 | -4.24 |



|        |       |       |       |       |       |       |       |       |       |       |       |
|--------|-------|-------|-------|-------|-------|-------|-------|-------|-------|-------|-------|
| 24.15  | -0.90 | -0.92 | -1.46 | -1.59 | -2.19 | -2.45 | -2.72 | -3.14 | -3.59 | -4.11 | -4.38 |
| 25.03  | -0.51 | -0.89 | -1.40 | -1.72 | -2.00 | -2.45 | -2.81 | -3.25 | -3.53 | -3.90 | -4.37 |
| 25.98  | -0.88 | -1.27 | -1.59 | -1.87 | -2.26 | -2.70 | -3.09 | -3.45 | -3.74 | -4.42 | -4.63 |
| 27.01  | -0.89 | -1.08 | -1.50 | -1.83 | -2.35 | -2.65 | -2.99 | -3.31 | -3.75 | -4.25 | -4.61 |
| 28.11  | -0.61 | -0.83 | -1.19 | -1.59 | -2.10 | -2.32 | -2.85 | -3.15 | -3.59 | -3.88 | -4.29 |
| 29.3   | -1.28 | -1.43 | -1.85 | -2.27 | -2.79 | -3.01 | -3.44 | -3.68 | -3.98 | -4.54 | -4.91 |
| 30.59  | -0.52 | -1.03 | -1.40 | -1.73 | -2.08 | -2.45 | -2.81 | -3.08 | -3.41 | -3.94 | -4.22 |
| 31.98  | -0.81 | -0.89 | -1.31 | -1.73 | -2.38 | -2.44 | -2.94 | -3.21 | -3.65 | -4.04 | -4.47 |
| 33.47  | -0.47 | -0.84 | -1.41 | -1.75 | -1.90 | -2.46 | -2.65 | -3.08 | -3.61 | -3.91 | -4.52 |
| 35.09  | -0.67 | -0.89 | -1.35 | -1.68 | -2.07 | -2.43 | -2.76 | -3.15 | -3.41 | -3.89 | -4.19 |
| 36.83  | -0.90 | -1.15 | -1.67 | -1.98 | -2.30 | -2.54 | -3.01 | -3.27 | -3.72 | -4.01 | -4.39 |
| 38.71  | -0.87 | -1.10 | -1.52 | -1.82 | -2.23 | -2.80 | -2.88 | -3.36 | -3.62 | -3.91 | -4.49 |
| 40.73  | -0.62 | -0.96 | -1.37 | -1.68 | -2.38 | -2.70 | -2.84 | -3.11 | -3.61 | -4.02 | -4.48 |
| 42.92  | -0.59 | -1.23 | -1.29 | -1.79 | -2.30 | -2.52 | -2.86 | -3.34 | -3.64 | -4.14 | -4.52 |
| 45.27  | -0.82 | -1.23 | -1.39 | -1.85 | -2.44 | -2.54 | -3.04 | -3.52 | -3.75 | -4.12 | -4.65 |
| 47.81  | -0.96 | -1.26 | -1.63 | -1.90 | -2.55 | -2.84 | -2.96 | -3.51 | -3.92 | -4.21 | -4.80 |
| 50.55  | -0.95 | -1.37 | -1.71 | -2.02 | -2.43 | -2.82 | -3.19 | -3.65 | -3.83 | -4.42 | -4.61 |
| 53.51  | -1.29 | -1.53 | -2.04 | -2.47 | -2.67 | -3.05 | -3.28 | -3.84 | -4.08 | -4.42 | -4.80 |
| 56.69  | -1.18 | -1.26 | -1.89 | -2.34 | -2.45 | -2.86 | -3.24 | -3.55 | -3.98 | -4.46 | -4.94 |
| 60.13  | -0.83 | -1.19 | -1.41 | -1.73 | -2.24 | -2.59 | -3.04 | -3.41 | -3.72 | -4.21 | -4.54 |
| 63.84  | -0.91 | -1.45 | -1.60 | -2.10 | -2.43 | -2.67 | -3.19 | -3.57 | -3.94 | -4.33 | -4.63 |
| 67.83  | -1.25 | -1.56 | -1.92 | -2.13 | -2.72 | -2.91 | -3.34 | -3.77 | -4.04 | -4.67 | -4.79 |
| 72.15  | -1.09 | -1.51 | -1.83 | -2.25 | -2.59 | -2.93 | -3.20 | -3.61 | -3.88 | -4.36 | -4.73 |
| 76.8   | -1.00 | -1.24 | -1.76 | -1.93 | -2.60 | -2.70 | -3.16 | -3.53 | -3.80 | -4.39 | -4.64 |
| 81.81  | -1.13 | -1.30 | -1.74 | -2.24 | -2.53 | -2.83 | -3.02 | -3.53 | -3.82 | -4.20 | -4.64 |
| 87.22  | -0.96 | -1.42 | -1.94 | -2.07 | -2.63 | -2.91 | -3.39 | -3.61 | -3.73 | -4.20 | -4.79 |
| 93.06  | -0.92 | -1.25 | -1.74 | -1.90 | -2.47 | -2.72 | -2.98 | -3.48 | -3.71 | -4.24 | -4.59 |
| 99.35  | -0.95 | -1.18 | -1.54 | -1.98 | -2.25 | -2.68 | -3.12 | -3.48 | -3.66 | -4.17 | -4.60 |
| 106.13 | -1.28 | -1.55 | -1.73 | -2.13 | -2.67 | -2.97 | -3.14 | -3.56 | -3.77 | -4.20 | -4.66 |
| 113.45 | -0.84 | -1.33 | -1.68 | -1.95 | -2.38 | -2.64 | -3.17 | -3.38 | -3.75 | -4.09 | -4.58 |
| 121.34 | -1.01 | -1.32 | -1.67 | -2.08 | -2.43 | -2.85 | -3.16 | -3.35 | -3.90 | -4.20 | -4.53 |
| 129.86 | -1.13 | -1.45 | -1.83 | -2.28 | -2.58 | -2.93 | -3.26 | -3.53 | -4.21 | -4.25 | -4.66 |
| 139.04 | -1.08 | -1.24 | -1.57 | -2.08 | -2.39 | -2.79 | -2.98 | -3.31 | -3.67 | -3.93 | -4.43 |
| 148.94 | -1.29 | -1.40 | -1.91 | -2.27 | -2.63 | -2.83 | -3.22 | -3.74 | -3.95 | -4.30 | -4.69 |
| 159.62 | -1.19 | -1.38 | -1.80 | -2.07 | -2.42 | -2.92 | -3.07 | -3.40 | -3.71 | -4.25 | -4.53 |
| 171.14 | -0.89 | -1.20 | -1.45 | -1.87 | -2.22 | -2.58 | -2.72 | -3.14 | -3.36 | -3.91 | -4.11 |
| 183.56 | -1.39 | -1.57 | -2.02 | -2.33 | -2.52 | -2.92 | -3.26 | -3.54 | -3.94 | -4.25 | -4.56 |
| 196.96 | -1.20 | -1.33 | -1.82 | -1.99 | -2.41 | -2.74 | -3.02 | -3.35 | -3.77 | -4.29 | -4.39 |
| 211.41 | -1.11 | -1.30 | -1.85 | -1.98 | -2.50 | -2.66 | -2.99 | -3.35 | -3.76 | -4.07 | -4.27 |
| 226.99 | -1.14 | -1.31 | -1.89 | -1.95 | -2.43 | -2.80 | -3.12 | -3.36 | -3.68 | -4.13 | -4.33 |
| 243.8  | -1.28 | -1.55 | -1.75 | -2.18 | -2.60 | -3.00 | -3.04 | -3.41 | -3.68 | -4.23 | -4.36 |
| 261.93 | -1.34 | -1.50 | -1.93 | -2.27 | -2.62 | -2.63 | -3.04 | -3.34 | -3.61 | -4.12 | -4.37 |
| 281.48 | -0.95 | -1.18 | -1.78 | -2.02 | -2.45 | -2.81 | -2.93 | -3.18 | -3.48 | -3.99 | -4.35 |
| 302.56 | -1.17 | -1.39 | -1.71 | -2.14 | -2.49 | -2.40 | -2.91 | -3.38 | -3.42 | -3.84 | -4.22 |
| 325.3  | -1.36 | -1.73 | -1.78 | -2.30 | -2.59 | -2.74 | -3.20 | -3.51 | -3.81 | -4.18 | -4.38 |
| 349.83 | -1.30 | -1.63 | -1.84 | -2.02 | -2.64 | -2.77 | -2.87 | -3.35 | -3.48 | -3.93 | -4.35 |
| 376.28 | -1.33 | -1.45 | -1.87 | -1.91 | -2.43 | -2.54 | -3.06 | -3.15 | -3.49 | -3.85 | -4.27 |
| 404.81 | -0.92 | -1.21 | -1.47 | -1.67 | -2.18 | -2.39 | -2.53 | -2.97 | -3.17 | -3.76 | -3.88 |
| 435.58 | -1.25 | -1.33 | -1.83 | -2.13 | -2.54 | -2.73 | -3.06 | -3.26 | -3.62 | -3.92 | -4.33 |
| 468.76 | -1.08 | -1.25 | -1.48 | -2.06 | -2.16 | -2.29 | -2.80 | -3.05 | -3.41 | -3.70 | -3.88 |

|         |       |       |       |       |       |       |       |       |       |       |       |
|---------|-------|-------|-------|-------|-------|-------|-------|-------|-------|-------|-------|
| 504.55  | -0.89 | -1.23 | -1.46 | -1.93 | -2.34 | -2.49 | -2.57 | -2.90 | -3.32 | -3.55 | -3.88 |
| 543.15  | -1.32 | -1.36 | -1.75 | -2.06 | -2.48 | -2.50 | -2.82 | -3.10 | -3.39 | -3.74 | -3.91 |
| 584.78  | -1.18 | -1.52 | -1.72 | -1.94 | -2.32 | -2.53 | -2.73 | -3.19 | -3.48 | -3.59 | -3.79 |
| 629.68  | -0.98 | -1.38 | -1.50 | -1.82 | -2.30 | -2.53 | -2.70 | -3.11 | -3.12 | -3.50 | -3.87 |
| 678.1   | -0.74 | -0.90 | -1.35 | -1.51 | -1.98 | -2.19 | -2.44 | -2.76 | -2.78 | -3.03 | -3.51 |
| 730.33  | -0.91 | -1.15 | -1.35 | -1.91 | -2.10 | -2.37 | -2.42 | -2.72 | -3.10 | -3.16 | -3.63 |
| 786.65  | -1.05 | -1.21 | -1.66 | -1.70 | -2.18 | -2.30 | -2.68 | -2.84 | -3.30 | -3.40 | -3.69 |
| 847.4   | -1.41 | -1.59 | -1.80 | -1.97 | -2.40 | -2.42 | -2.82 | -3.03 | -3.23 | -3.79 | -3.87 |
| 912.92  | -1.05 | -1.40 | -1.69 | -1.81 | -2.11 | -2.46 | -2.61 | -2.94 | -3.00 | -3.36 | -3.54 |
| 983.58  | -1.03 | -1.22 | -1.67 | -1.64 | -2.11 | -2.28 | -2.49 | -2.88 | -2.92 | -3.32 | -3.69 |
| 1059.78 | -0.93 | -1.22 | -1.33 | -1.63 | -1.93 | -2.25 | -2.30 | -2.76 | -2.96 | -3.28 | -3.44 |
| 1141.98 | -0.77 | -1.14 | -1.35 | -1.63 | -1.77 | -2.06 | -2.32 | -2.48 | -2.61 | -2.88 | -3.19 |
| 1230.62 | -1.21 | -1.39 | -1.55 | -1.90 | -2.16 | -2.52 | -2.52 | -2.71 | -2.99 | -3.42 | -3.58 |
| 1326.23 | -0.91 | -1.20 | -1.32 | -1.85 | -1.98 | -2.26 | -2.37 | -2.70 | -2.77 | -3.14 | -3.43 |
| 1429.34 | -0.80 | -1.08 | -1.36 | -1.69 | -1.98 | -2.16 | -2.27 | -2.62 | -2.91 | -3.16 | -3.34 |
| 1540.54 | -1.27 | -1.35 | -1.71 | -2.14 | -2.45 | -2.60 | -2.80 | -3.11 | -3.23 | -3.49 | -3.84 |
| 1660.48 | -1.02 | -1.40 | -1.35 | -1.79 | -2.12 | -2.27 | -2.50 | -2.60 | -2.73 | -3.15 | -3.36 |
| 1789.83 | -1.48 | -1.75 | -1.97 | -2.31 | -2.47 | -2.77 | -2.97 | -3.12 | -3.26 | -3.75 | -4.11 |
| 1929.34 | -1.09 | -1.48 | -1.74 | -1.99 | -2.35 | -2.43 | -2.61 | -3.07 | -3.00 | -3.44 | -3.71 |
| 2079.8  | -1.47 | -1.67 | -1.97 | -2.06 | -2.55 | -2.63 | -3.13 | -3.06 | -3.26 | -3.86 | -3.85 |
| 2242.08 | -1.36 | -1.52 | -1.65 | -1.91 | -2.29 | -2.57 | -2.63 | -2.98 | -3.10 | -3.53 | -3.85 |
| 2417.1  | -1.18 | -1.27 | -1.61 | -1.98 | -2.08 | -2.50 | -2.70 | -2.94 | -3.04 | -3.32 | -3.67 |
| 2605.85 | -1.51 | -1.79 | -2.12 | -2.22 | -2.57 | -2.65 | -2.99 | -3.36 | -3.45 | -3.74 | -4.01 |
| 2809.43 | -1.57 | -1.71 | -1.98 | -2.14 | -2.48 | -2.80 | -2.81 | -3.12 | -3.29 | -3.65 | -3.71 |
| 3028.99 | -1.31 | -1.42 | -1.88 | -2.09 | -2.22 | -2.41 | -2.52 | -2.90 | -3.11 | -3.29 | -3.63 |
| 3265.79 | -1.32 | -1.65 | -1.89 | -2.24 | -2.53 | -2.62 | -3.00 | -3.01 | -3.34 | -3.68 | -3.84 |
| 3521.18 | -1.70 | -1.69 | -2.12 | -2.16 | -2.48 | -2.79 | -2.99 | -3.35 | -3.62 | -3.98 | -4.03 |
| 3796.62 | -1.50 | -1.81 | -2.07 | -2.40 | -2.56 | -2.84 | -2.91 | -3.26 | -3.43 | -3.83 | -3.98 |

| Wavelength (nm) \ Time (ps) | 475.64 | 477.05 | 478.46 | 479.87 | 481.28 | 482.69 | 484.10 | 485.50 | 486.91 | 488.32 | 489.73 |
|-----------------------------|--------|--------|--------|--------|--------|--------|--------|--------|--------|--------|--------|
| -3.28                       | 0.23   | 0.24   | 0.10   | 0.16   | 0.12   | 0.13   | 0.28   | 0.01   | 0.22   | 0.17   | 0.21   |
| -2.78                       | 0.23   | 0.15   | 0.11   | 0.12   | 0.13   | 0.02   | -0.06  | 0.11   | 0.13   | 0.06   | 0.09   |
| -2.28                       | -0.08  | -0.01  | 0.16   | 0.00   | -0.02  | 0.07   | 0.00   | 0.01   | 0.01   | 0.07   | -0.04  |
| -1.78                       | -0.13  | -0.02  | -0.01  | 0.20   | -0.05  | 0.09   | 0.01   | 0.17   | 0.00   | -0.10  | -0.04  |
| -1.28                       | -0.24  | -0.35  | -0.30  | -0.32  | -0.20  | -0.25  | -0.31  | -0.20  | -0.31  | -0.32  | -0.18  |
| -0.78                       | -0.05  | 0.13   | 0.07   | -0.02  | 0.13   | -0.01  | 0.01   | 0.07   | -0.03  | 0.09   | -0.01  |
| -0.28                       | -0.06  | -0.27  | -0.40  | -0.32  | -0.36  | -0.32  | -0.24  | -0.41  | -0.25  | -0.25  | -0.30  |
| 0.22                        | 0.10   | 0.13   | 0.27   | 0.17   | 0.26   | 0.25   | 0.29   | 0.23   | 0.23   | 0.27   | 0.27   |
| 0.32                        | 0.14   | 0.14   | 0.09   | 0.12   | 0.08   | 0.15   | -0.02  | 0.07   | 0.20   | 0.21   | 0.10   |
| 0.42                        | -0.05  | -0.08  | -0.04  | -0.09  | -0.27  | -0.10  | -0.22  | -0.08  | -0.16  | -0.20  | -0.12  |
| 0.52                        | -0.51  | -0.15  | -0.29  | -0.25  | -0.32  | -0.20  | -0.38  | -0.26  | -0.22  | -0.28  | -0.34  |
| 0.62                        | 0.20   | 0.17   | 0.13   | 0.12   | 0.20   | 0.07   | 0.07   | 0.18   | 0.15   | 0.09   | 0.15   |
| 0.72                        | -0.28  | -0.05  | -0.32  | -0.17  | -0.34  | -0.24  | -0.28  | -0.15  | -0.24  | -0.27  | -0.09  |
| 0.77                        | 0.13   | 0.27   | 0.12   | 0.27   | 0.18   | 0.21   | 0.15   | 0.15   | 0.12   | 0.23   | 0.15   |
| 0.82                        | 0.42   | 0.34   | 0.25   | 0.28   | 0.22   | 0.40   | 0.25   | 0.40   | 0.10   | 0.14   | 0.32   |
| 0.87                        | -0.02  | 0.03   | 0.02   | 0.03   | -0.02  | -0.06  | -0.01  | 0.00   | 0.14   | -0.14  | 0.08   |
| 0.92                        | -0.09  | 0.06   | -0.10  | 0.10   | -0.15  | -0.12  | -0.13  | 0.06   | 0.14   | -0.03  | -0.03  |

|      |       |       |       |       |       |       |        |        |        |        |        |
|------|-------|-------|-------|-------|-------|-------|--------|--------|--------|--------|--------|
| 0.97 | -0.10 | -0.05 | -0.33 | -0.23 | -0.15 | -0.15 | -0.16  | -0.09  | -0.20  | -0.23  | -0.08  |
| 1.02 | 0.05  | 0.05  | -0.07 | 0.01  | -0.06 | 0.05  | 0.07   | -0.03  | 0.08   | 0.03   | 0.05   |
| 1.07 | -0.05 | 0.26  | 0.08  | 0.18  | -0.02 | -0.01 | 0.08   | 0.15   | -0.05  | -0.02  | 0.33   |
| 1.12 | -0.06 | -0.17 | -0.17 | -0.16 | -0.40 | -0.19 | -0.16  | -0.16  | -0.17  | -0.18  | -0.26  |
| 1.17 | -0.15 | -0.23 | -0.39 | -0.16 | -0.31 | -0.30 | -0.28  | -0.20  | -0.34  | -0.21  | -0.22  |
| 1.22 | -0.16 | -0.18 | -0.03 | 0.09  | -0.05 | 0.06  | -0.03  | 0.06   | -0.01  | -0.16  | 0.21   |
| 1.27 | -0.65 | -0.32 | -0.54 | -0.46 | -0.62 | -0.54 | -0.36  | -0.35  | -0.37  | -0.36  | -0.53  |
| 1.32 | 0.42  | 0.26  | 0.13  | -0.01 | -0.07 | -0.07 | -0.40  | -0.39  | -0.46  | -0.51  | -0.74  |
| 1.37 | 3.90  | 3.55  | 2.96  | 2.58  | 2.30  | 1.92  | 1.50   | 1.23   | 0.94   | 0.60   | 0.24   |
| 1.42 | -0.61 | -0.89 | -1.04 | -1.26 | -1.58 | -1.72 | -1.60  | -1.60  | -1.51  | -1.45  | -1.42  |
| 1.47 | -4.46 | -5.14 | -5.83 | -6.21 | -7.00 | -7.53 | -7.93  | -8.28  | -8.63  | -8.94  | -8.95  |
| 1.52 | -5.55 | -6.27 | -6.98 | -7.64 | -8.50 | -9.11 | -9.77  | -10.37 | -10.79 | -11.25 | -11.76 |
| 1.57 | -5.88 | -6.68 | -7.56 | -8.18 | -8.96 | -9.79 | -10.43 | -11.17 | -11.68 | -12.41 | -12.81 |
| 1.62 | -5.71 | -6.45 | -7.18 | -8.00 | -8.86 | -9.42 | -10.19 | -10.81 | -11.31 | -12.10 | -12.69 |
| 1.67 | -5.42 | -6.14 | -7.07 | -7.56 | -8.31 | -8.87 | -9.75  | -10.27 | -10.96 | -11.48 | -11.95 |
| 1.72 | -5.33 | -5.86 | -6.44 | -7.19 | -7.75 | -8.54 | -9.09  | -9.43  | -10.10 | -10.69 | -11.10 |
| 1.77 | -5.29 | -5.81 | -6.28 | -7.03 | -7.73 | -8.17 | -8.74  | -9.53  | -9.88  | -10.43 | -10.82 |
| 1.82 | -5.11 | -5.67 | -6.26 | -6.83 | -7.49 | -8.20 | -8.76  | -9.28  | -9.70  | -10.26 | -10.72 |
| 1.87 | -4.88 | -5.52 | -6.25 | -6.81 | -7.27 | -7.78 | -8.45  | -9.03  | -9.46  | -10.00 | -10.28 |
| 1.92 | -4.67 | -5.22 | -5.91 | -6.36 | -7.07 | -7.48 | -8.11  | -8.62  | -9.19  | -9.60  | -10.06 |
| 1.97 | -4.88 | -5.41 | -6.02 | -6.42 | -7.19 | -7.68 | -8.33  | -8.77  | -9.31  | -9.63  | -10.03 |
| 2.02 | -4.74 | -5.30 | -5.77 | -6.47 | -7.07 | -7.48 | -7.96  | -8.35  | -8.91  | -9.29  | -9.67  |
| 2.07 | -4.80 | -5.21 | -5.89 | -6.37 | -6.92 | -7.64 | -7.95  | -8.57  | -8.90  | -9.43  | -9.74  |
| 2.12 | -4.78 | -5.15 | -5.73 | -6.31 | -6.93 | -7.28 | -7.75  | -8.18  | -8.66  | -9.14  | -9.61  |
| 2.17 | -4.42 | -4.95 | -5.63 | -6.02 | -6.58 | -7.00 | -7.65  | -8.12  | -8.52  | -8.89  | -9.27  |
| 2.22 | -4.40 | -4.80 | -5.49 | -5.95 | -6.56 | -6.99 | -7.57  | -7.87  | -8.26  | -8.65  | -8.96  |
| 2.27 | -4.23 | -4.92 | -5.38 | -5.99 | -6.57 | -6.98 | -7.36  | -7.80  | -8.28  | -8.67  | -9.02  |
| 2.32 | -4.58 | -5.06 | -5.82 | -6.31 | -6.89 | -7.26 | -7.82  | -8.20  | -8.61  | -9.01  | -9.21  |
| 2.37 | -4.46 | -5.06 | -5.73 | -6.15 | -6.69 | -7.14 | -7.63  | -8.11  | -8.38  | -8.85  | -9.14  |
| 2.42 | -4.38 | -4.99 | -5.62 | -5.99 | -6.62 | -7.07 | -7.40  | -7.75  | -8.29  | -8.69  | -8.87  |
| 2.47 | -4.37 | -4.86 | -5.30 | -5.82 | -6.34 | -6.96 | -7.40  | -7.67  | -8.14  | -8.58  | -8.95  |
| 2.52 | -4.53 | -5.15 | -5.60 | -5.86 | -6.67 | -7.00 | -7.57  | -7.84  | -8.24  | -8.70  | -8.97  |
| 2.57 | -4.76 | -5.16 | -5.59 | -5.95 | -6.72 | -7.21 | -7.50  | -7.83  | -8.37  | -8.62  | -8.94  |
| 2.62 | -4.93 | -5.46 | -5.85 | -6.35 | -6.87 | -7.45 | -7.79  | -8.26  | -8.52  | -8.86  | -9.32  |
| 2.67 | -4.72 | -5.08 | -5.65 | -6.12 | -6.67 | -7.01 | -7.57  | -7.95  | -8.38  | -8.65  | -9.01  |
| 2.72 | -4.47 | -4.88 | -5.49 | -5.94 | -6.51 | -6.91 | -7.47  | -7.71  | -8.23  | -8.56  | -8.77  |
| 2.77 | -5.00 | -5.26 | -5.91 | -6.36 | -6.94 | -7.50 | -7.90  | -8.25  | -8.68  | -9.03  | -9.35  |
| 2.82 | -4.47 | -4.73 | -5.52 | -5.85 | -6.53 | -6.73 | -7.34  | -7.67  | -8.13  | -8.34  | -8.65  |
| 2.87 | -4.85 | -5.24 | -5.87 | -6.10 | -6.70 | -7.15 | -7.56  | -7.91  | -8.32  | -8.61  | -8.97  |
| 2.92 | -4.65 | -5.07 | -5.50 | -5.94 | -6.64 | -7.09 | -7.53  | -8.00  | -8.43  | -8.59  | -8.82  |
| 2.97 | -5.02 | -5.39 | -5.94 | -6.39 | -7.07 | -7.50 | -7.97  | -8.41  | -8.56  | -9.06  | -9.35  |
| 3.02 | -4.81 | -5.12 | -5.75 | -6.30 | -6.72 | -7.19 | -7.69  | -8.03  | -8.28  | -8.81  | -9.08  |
| 3.07 | -4.72 | -5.18 | -5.62 | -6.04 | -6.63 | -7.01 | -7.49  | -7.90  | -8.12  | -8.36  | -8.82  |
| 3.12 | -4.68 | -5.29 | -5.75 | -6.19 | -6.63 | -7.20 | -7.63  | -8.06  | -8.33  | -8.78  | -8.92  |
| 3.17 | -4.88 | -5.36 | -5.70 | -6.16 | -6.82 | -7.15 | -7.70  | -8.06  | -8.46  | -8.77  | -8.97  |
| 3.22 | -4.74 | -5.15 | -5.60 | -6.08 | -6.47 | -7.09 | -7.54  | -7.97  | -8.28  | -8.65  | -8.83  |
| 3.27 | -4.48 | -4.85 | -5.60 | -5.83 | -6.41 | -6.88 | -7.44  | -7.80  | -8.00  | -8.48  | -8.67  |
| 3.32 | -4.31 | -4.90 | -5.33 | -5.77 | -6.36 | -6.57 | -7.23  | -7.60  | -7.95  | -8.26  | -8.45  |
| 3.37 | -4.59 | -5.16 | -5.59 | -6.05 | -6.61 | -6.95 | -7.46  | -7.91  | -8.23  | -8.56  | -8.73  |
| 3.42 | -4.91 | -5.41 | -5.86 | -6.27 | -6.73 | -7.09 | -7.68  | -8.02  | -8.25  | -8.52  | -8.76  |

|       |       |       |       |       |       |       |       |       |       |       |       |
|-------|-------|-------|-------|-------|-------|-------|-------|-------|-------|-------|-------|
| 3.47  | -4.61 | -5.04 | -5.51 | -6.04 | -6.56 | -6.94 | -7.47 | -7.88 | -8.24 | -8.33 | -8.48 |
| 3.52  | -4.84 | -5.37 | -5.90 | -6.26 | -6.96 | -7.28 | -7.72 | -7.89 | -8.38 | -8.68 | -8.93 |
| 3.57  | -4.82 | -5.28 | -5.88 | -6.12 | -6.62 | -7.17 | -7.63 | -7.92 | -8.34 | -8.70 | -8.81 |
| 3.62  | -4.95 | -5.44 | -5.91 | -6.48 | -6.83 | -7.23 | -7.61 | -8.05 | -8.37 | -8.70 | -8.97 |
| 3.67  | -4.76 | -5.30 | -5.85 | -6.17 | -6.67 | -7.19 | -7.48 | -8.05 | -8.43 | -8.56 | -8.79 |
| 3.72  | -4.63 | -5.03 | -5.62 | -5.97 | -6.49 | -6.87 | -7.39 | -7.69 | -7.95 | -8.40 | -8.51 |
| 3.92  | -4.79 | -5.19 | -5.52 | -6.09 | -6.59 | -7.01 | -7.40 | -7.71 | -8.18 | -8.26 | -8.46 |
| 4.12  | -4.50 | -5.17 | -5.80 | -6.08 | -6.68 | -6.97 | -7.47 | -7.76 | -8.15 | -8.40 | -8.66 |
| 4.32  | -4.79 | -5.20 | -5.77 | -6.29 | -6.62 | -7.25 | -7.55 | -7.95 | -8.48 | -8.65 | -8.96 |
| 4.52  | -4.47 | -4.83 | -5.55 | -5.89 | -6.51 | -6.80 | -7.30 | -7.63 | -7.98 | -8.33 | -8.60 |
| 4.72  | -4.57 | -5.20 | -5.57 | -6.07 | -6.59 | -6.90 | -7.27 | -7.68 | -8.12 | -8.41 | -8.56 |
| 4.92  | -4.81 | -5.08 | -5.81 | -6.15 | -6.80 | -7.03 | -7.59 | -7.84 | -8.14 | -8.55 | -8.76 |
| 5.12  | -4.81 | -5.29 | -5.75 | -6.25 | -6.80 | -7.28 | -7.70 | -7.94 | -8.21 | -8.60 | -8.76 |
| 5.32  | -4.91 | -5.50 | -5.88 | -6.45 | -6.82 | -7.21 | -7.64 | -8.03 | -8.31 | -8.82 | -8.86 |
| 5.52  | -4.65 | -5.01 | -5.61 | -5.96 | -6.49 | -6.89 | -7.42 | -7.85 | -7.86 | -8.29 | -8.49 |
| 5.72  | -5.14 | -5.66 | -6.15 | -6.54 | -7.10 | -7.43 | -7.91 | -8.22 | -8.58 | -8.84 | -9.03 |
| 5.92  | -4.66 | -5.20 | -5.53 | -6.01 | -6.70 | -6.86 | -7.32 | -7.61 | -8.08 | -8.37 | -8.47 |
| 6.12  | -4.86 | -5.23 | -5.79 | -6.28 | -6.78 | -7.25 | -7.50 | -7.95 | -8.20 | -8.52 | -8.74 |
| 6.32  | -4.82 | -5.16 | -5.81 | -5.97 | -6.64 | -7.11 | -7.51 | -7.78 | -8.04 | -8.40 | -8.77 |
| 6.52  | -4.66 | -5.02 | -5.68 | -6.08 | -6.54 | -6.94 | -7.39 | -7.54 | -7.98 | -8.13 | -8.46 |
| 6.72  | -4.97 | -5.34 | -5.72 | -6.21 | -6.73 | -7.21 | -7.50 | -7.99 | -8.31 | -8.45 | -8.63 |
| 6.92  | -4.84 | -5.16 | -5.62 | -5.99 | -6.52 | -7.06 | -7.40 | -7.64 | -8.01 | -8.38 | -8.48 |
| 7.12  | -4.47 | -4.98 | -5.40 | -5.77 | -6.24 | -6.54 | -7.02 | -7.40 | -7.62 | -7.87 | -8.08 |
| 7.32  | -4.78 | -5.25 | -5.58 | -6.07 | -6.55 | -6.95 | -7.35 | -7.68 | -8.12 | -8.35 | -8.43 |
| 7.52  | -4.79 | -5.23 | -5.54 | -5.92 | -6.52 | -6.95 | -7.31 | -7.58 | -7.93 | -8.38 | -8.52 |
| 7.72  | -5.08 | -5.30 | -5.81 | -6.30 | -6.79 | -7.20 | -7.61 | -7.86 | -8.20 | -8.58 | -8.72 |
| 7.92  | -4.94 | -5.20 | -5.59 | -6.20 | -6.80 | -6.93 | -7.41 | -7.77 | -8.03 | -8.20 | -8.37 |
| 8.12  | -4.77 | -5.26 | -5.74 | -6.03 | -6.48 | -7.02 | -7.34 | -7.54 | -8.00 | -8.36 | -8.33 |
| 8.32  | -4.46 | -4.91 | -5.54 | -5.97 | -6.39 | -6.86 | -7.17 | -7.53 | -7.93 | -8.20 | -8.24 |
| 8.52  | -4.83 | -5.07 | -5.70 | -6.01 | -6.63 | -6.99 | -7.30 | -7.78 | -8.05 | -8.28 | -8.56 |
| 8.72  | -4.70 | -4.98 | -5.55 | -5.98 | -6.55 | -7.00 | -7.44 | -7.77 | -7.96 | -8.35 | -8.44 |
| 8.92  | -5.04 | -5.56 | -6.00 | -6.23 | -6.99 | -7.09 | -7.72 | -7.89 | -8.31 | -8.43 | -8.79 |
| 9.12  | -4.82 | -5.21 | -5.81 | -6.10 | -6.62 | -6.99 | -7.49 | -7.80 | -8.09 | -8.32 | -8.58 |
| 9.32  | -5.25 | -5.63 | -6.26 | -6.46 | -7.07 | -7.35 | -7.75 | -8.27 | -8.42 | -8.77 | -8.98 |
| 9.52  | -4.87 | -5.51 | -5.85 | -6.15 | -6.88 | -7.34 | -7.60 | -7.80 | -8.15 | -8.31 | -8.63 |
| 9.72  | -4.87 | -5.31 | -5.78 | -6.15 | -6.76 | -7.06 | -7.60 | -7.97 | -8.16 | -8.45 | -8.63 |
| 9.92  | -4.88 | -5.48 | -5.83 | -6.37 | -6.80 | -7.29 | -7.71 | -7.97 | -8.24 | -8.56 | -8.83 |
| 10.12 | -4.70 | -5.06 | -5.57 | -6.02 | -6.55 | -6.95 | -7.28 | -7.63 | -7.81 | -8.09 | -8.37 |
| 10.32 | -4.88 | -5.10 | -5.66 | -6.22 | -6.59 | -6.91 | -7.23 | -7.58 | -8.00 | -8.18 | -8.33 |
| 10.52 | -4.80 | -5.31 | -5.70 | -6.10 | -6.68 | -6.93 | -7.43 | -7.60 | -7.99 | -8.31 | -8.54 |
| 10.72 | -4.98 | -5.26 | -5.85 | -6.23 | -6.75 | -6.93 | -7.33 | -7.63 | -8.06 | -8.21 | -8.41 |
| 10.92 | -4.69 | -5.09 | -5.73 | -6.16 | -6.44 | -6.86 | -7.23 | -7.73 | -8.08 | -8.29 | -8.30 |
| 11.12 | -5.05 | -5.44 | -5.79 | -6.29 | -6.82 | -7.30 | -7.42 | -7.88 | -8.15 | -8.37 | -8.71 |
| 11.32 | -5.00 | -5.30 | -5.71 | -6.00 | -6.52 | -6.97 | -7.34 | -7.59 | -7.99 | -8.17 | -8.42 |
| 11.52 | -4.55 | -4.95 | -5.46 | -5.64 | -6.33 | -6.72 | -6.86 | -7.29 | -7.63 | -7.80 | -8.16 |
| 11.72 | -4.72 | -5.27 | -5.75 | -6.12 | -6.61 | -6.86 | -7.39 | -7.52 | -7.83 | -8.15 | -8.34 |
| 11.92 | -4.64 | -4.85 | -5.39 | -5.81 | -6.30 | -6.55 | -6.88 | -7.09 | -7.37 | -7.73 | -8.05 |
| 12.12 | -4.34 | -4.53 | -5.20 | -5.47 | -6.12 | -6.47 | -6.72 | -7.08 | -7.18 | -7.54 | -7.66 |
| 12.32 | -4.95 | -5.53 | -5.66 | -6.11 | -6.77 | -7.12 | -7.45 | -7.79 | -8.12 | -8.26 | -8.50 |
| 12.52 | -4.66 | -5.13 | -5.64 | -5.86 | -6.56 | -6.96 | -7.14 | -7.50 | -7.87 | -7.99 | -8.12 |

|       |       |       |       |       |       |       |       |       |       |       |       |
|-------|-------|-------|-------|-------|-------|-------|-------|-------|-------|-------|-------|
| 12.72 | -5.24 | -5.55 | -6.13 | -6.35 | -7.03 | -7.33 | -7.61 | -7.91 | -8.15 | -8.40 | -8.66 |
| 12.92 | -4.81 | -5.22 | -5.78 | -6.14 | -6.76 | -6.97 | -7.29 | -7.72 | -7.88 | -8.25 | -8.36 |
| 13.12 | -4.55 | -5.00 | -5.55 | -6.11 | -6.44 | -6.73 | -7.13 | -7.42 | -7.78 | -8.14 | -8.20 |
| 13.32 | -5.00 | -5.41 | -5.98 | -6.31 | -6.94 | -7.22 | -7.65 | -8.02 | -8.33 | -8.55 | -8.69 |
| 13.52 | -4.79 | -5.27 | -5.80 | -6.07 | -6.62 | -7.22 | -7.46 | -7.71 | -7.91 | -8.27 | -8.54 |
| 13.72 | -4.62 | -5.05 | -5.57 | -5.98 | -6.43 | -6.89 | -7.31 | -7.51 | -7.65 | -8.05 | -8.23 |
| 13.92 | -4.91 | -5.36 | -5.87 | -6.21 | -6.58 | -7.18 | -7.57 | -7.75 | -8.10 | -8.33 | -8.64 |
| 14    | -4.84 | -5.21 | -5.63 | -5.92 | -6.39 | -6.91 | -7.35 | -7.64 | -8.00 | -8.09 | -8.29 |
| 14.08 | -4.66 | -5.17 | -5.76 | -6.16 | -6.55 | -6.90 | -7.29 | -7.80 | -8.00 | -8.26 | -8.47 |
| 14.17 | -4.80 | -5.16 | -5.51 | -5.86 | -6.38 | -6.83 | -7.14 | -7.39 | -7.76 | -7.97 | -8.06 |
| 14.27 | -4.69 | -5.23 | -5.72 | -6.12 | -6.72 | -6.98 | -7.42 | -7.66 | -7.88 | -8.10 | -8.33 |
| 14.38 | -4.86 | -5.31 | -5.76 | -6.18 | -6.57 | -6.93 | -7.26 | -7.67 | -7.98 | -8.25 | -8.35 |
| 14.49 | -4.83 | -5.07 | -5.61 | -5.88 | -6.62 | -6.83 | -7.25 | -7.48 | -7.64 | -8.14 | -8.31 |
| 14.61 | -4.95 | -5.39 | -5.95 | -6.04 | -6.76 | -7.12 | -7.46 | -7.91 | -8.15 | -8.26 | -8.41 |
| 14.75 | -4.81 | -5.15 | -5.61 | -6.12 | -6.45 | -6.97 | -7.43 | -7.68 | -7.93 | -8.08 | -8.37 |
| 14.89 | -4.99 | -5.25 | -5.87 | -6.19 | -6.63 | -6.92 | -7.43 | -7.65 | -7.95 | -8.36 | -8.33 |
| 15.05 | -4.81 | -5.36 | -5.67 | -6.10 | -6.47 | -6.99 | -7.27 | -7.54 | -7.79 | -8.03 | -8.22 |
| 15.21 | -4.91 | -5.20 | -5.79 | -6.12 | -6.77 | -7.06 | -7.40 | -7.70 | -7.94 | -8.22 | -8.29 |
| 15.39 | -4.96 | -5.48 | -5.71 | -6.18 | -6.61 | -7.01 | -7.50 | -7.75 | -7.97 | -8.22 | -8.41 |
| 15.59 | -5.18 | -5.41 | -5.98 | -6.31 | -6.79 | -7.24 | -7.63 | -7.82 | -8.25 | -8.35 | -8.65 |
| 15.8  | -4.69 | -5.13 | -5.53 | -6.06 | -6.45 | -6.81 | -7.21 | -7.50 | -7.53 | -8.08 | -8.17 |
| 16.02 | -4.74 | -5.00 | -5.69 | -5.91 | -6.49 | -6.84 | -7.08 | -7.40 | -7.76 | -7.93 | -8.04 |
| 16.27 | -4.84 | -5.36 | -5.81 | -6.14 | -6.53 | -7.01 | -7.28 | -7.54 | -7.77 | -7.95 | -8.31 |
| 16.53 | -4.70 | -5.03 | -5.47 | -6.02 | -6.53 | -6.68 | -7.25 | -7.45 | -7.91 | -8.02 | -8.26 |
| 16.81 | -5.01 | -5.53 | -5.78 | -6.26 | -6.52 | -7.02 | -7.45 | -7.72 | -7.88 | -8.14 | -8.41 |
| 17.12 | -4.84 | -5.28 | -5.55 | -6.01 | -6.52 | -6.97 | -7.33 | -7.63 | -7.80 | -8.05 | -8.29 |
| 17.45 | -4.67 | -5.26 | -5.73 | -6.15 | -6.65 | -6.94 | -7.25 | -7.60 | -7.96 | -8.16 | -8.53 |
| 17.81 | -4.82 | -5.25 | -5.67 | -6.02 | -6.52 | -6.93 | -7.16 | -7.49 | -7.74 | -8.10 | -8.16 |
| 18.19 | -4.82 | -5.17 | -5.64 | -5.93 | -6.47 | -6.77 | -7.12 | -7.50 | -7.87 | -7.97 | -8.26 |
| 18.6  | -4.94 | -5.16 | -5.52 | -6.09 | -6.45 | -6.82 | -7.22 | -7.40 | -7.82 | -8.02 | -8.14 |
| 19.05 | -5.05 | -5.43 | -5.95 | -6.37 | -7.03 | -7.29 | -7.66 | -7.88 | -8.29 | -8.47 | -8.60 |
| 19.53 | -4.83 | -5.03 | -5.57 | -6.08 | -6.46 | -6.77 | -7.23 | -7.44 | -7.78 | -7.90 | -8.02 |
| 20.05 | -4.85 | -5.34 | -5.76 | -6.18 | -6.55 | -7.05 | -7.20 | -7.50 | -7.81 | -8.03 | -8.20 |
| 20.61 | -4.73 | -5.18 | -5.63 | -6.00 | -6.60 | -7.04 | -7.33 | -7.61 | -7.93 | -8.07 | -8.46 |
| 21.22 | -4.99 | -5.38 | -5.71 | -6.13 | -6.69 | -7.13 | -7.37 | -7.72 | -7.92 | -8.23 | -8.40 |
| 21.87 | -4.76 | -5.20 | -5.72 | -5.98 | -6.44 | -6.85 | -7.20 | -7.58 | -7.82 | -8.00 | -8.25 |
| 22.57 | -4.86 | -5.31 | -5.77 | -6.27 | -6.79 | -6.89 | -7.41 | -7.74 | -7.91 | -8.16 | -8.36 |
| 23.33 | -4.70 | -5.09 | -5.57 | -5.88 | -6.40 | -6.61 | -7.18 | -7.38 | -7.61 | -7.85 | -8.08 |
| 24.15 | -4.74 | -5.22 | -5.61 | -5.94 | -6.43 | -6.75 | -7.02 | -7.37 | -7.63 | -7.92 | -8.07 |
| 25.03 | -4.90 | -5.12 | -5.65 | -6.10 | -6.48 | -6.74 | -7.05 | -7.50 | -7.80 | -7.90 | -8.11 |
| 25.98 | -5.21 | -5.56 | -6.00 | -6.41 | -6.97 | -7.25 | -7.58 | -7.92 | -8.22 | -8.45 | -8.58 |
| 27.01 | -5.08 | -5.51 | -5.82 | -6.30 | -6.76 | -7.14 | -7.40 | -7.75 | -8.10 | -8.25 | -8.56 |
| 28.11 | -4.65 | -5.15 | -5.46 | -6.05 | -6.29 | -6.88 | -7.03 | -7.31 | -7.77 | -7.94 | -8.05 |
| 29.3  | -5.31 | -5.78 | -6.09 | -6.48 | -6.89 | -7.20 | -7.74 | -8.06 | -8.17 | -8.46 | -8.61 |
| 30.59 | -4.63 | -5.13 | -5.60 | -5.86 | -6.36 | -6.54 | -6.98 | -7.16 | -7.36 | -7.63 | -7.86 |
| 31.98 | -4.75 | -5.21 | -5.71 | -6.01 | -6.46 | -6.93 | -7.34 | -7.59 | -7.65 | -8.14 | -8.25 |
| 33.47 | -4.86 | -5.05 | -5.57 | -5.92 | -6.32 | -6.78 | -7.14 | -7.30 | -7.60 | -7.99 | -7.95 |
| 35.09 | -4.71 | -4.95 | -5.61 | -5.70 | -6.37 | -6.76 | -7.08 | -7.34 | -7.66 | -7.94 | -8.03 |
| 36.83 | -4.91 | -5.22 | -5.84 | -6.08 | -6.50 | -6.97 | -7.40 | -7.50 | -7.84 | -8.11 | -8.17 |
| 38.71 | -4.92 | -5.36 | -5.74 | -6.17 | -6.74 | -6.93 | -7.19 | -7.59 | -7.78 | -7.95 | -8.20 |

|         |       |       |       |       |       |       |       |       |       |       |       |
|---------|-------|-------|-------|-------|-------|-------|-------|-------|-------|-------|-------|
| 40.73   | -4.95 | -5.40 | -5.69 | -6.27 | -6.66 | -6.98 | -7.31 | -7.68 | -7.97 | -8.06 | -8.26 |
| 42.92   | -4.71 | -5.52 | -5.80 | -6.21 | -6.68 | -7.16 | -7.43 | -7.71 | -7.96 | -8.12 | -8.20 |
| 45.27   | -5.23 | -5.50 | -5.87 | -6.19 | -6.62 | -7.07 | -7.47 | -7.71 | -8.06 | -8.21 | -8.35 |
| 47.81   | -5.31 | -5.57 | -6.01 | -6.55 | -6.91 | -7.31 | -7.57 | -7.95 | -8.17 | -8.22 | -8.46 |
| 50.55   | -5.28 | -5.47 | -5.99 | -6.28 | -6.78 | -7.12 | -7.49 | -7.70 | -8.04 | -8.29 | -8.27 |
| 53.51   | -5.24 | -5.64 | -6.11 | -6.35 | -6.76 | -7.12 | -7.40 | -7.69 | -8.12 | -8.26 | -8.33 |
| 56.69   | -5.31 | -5.43 | -6.17 | -6.47 | -6.91 | -7.19 | -7.58 | -7.86 | -8.16 | -8.33 | -8.51 |
| 60.13   | -5.02 | -5.26 | -5.64 | -6.16 | -6.58 | -6.75 | -7.32 | -7.49 | -7.85 | -8.07 | -8.20 |
| 63.84   | -5.04 | -5.44 | -5.95 | -6.23 | -6.73 | -6.95 | -7.49 | -7.75 | -7.93 | -8.24 | -8.53 |
| 67.83   | -5.30 | -5.70 | -6.20 | -6.48 | -6.81 | -7.28 | -7.67 | -7.93 | -8.24 | -8.52 | -8.72 |
| 72.15   | -5.11 | -5.56 | -5.93 | -6.33 | -6.76 | -6.99 | -7.38 | -7.65 | -7.92 | -8.10 | -8.25 |
| 76.8    | -5.11 | -5.44 | -5.75 | -6.06 | -6.57 | -6.93 | -7.28 | -7.48 | -7.71 | -7.94 | -8.09 |
| 81.81   | -4.99 | -5.50 | -5.90 | -5.94 | -6.68 | -6.89 | -7.10 | -7.62 | -7.88 | -8.20 | -8.24 |
| 87.22   | -5.06 | -5.49 | -5.96 | -6.28 | -6.73 | -7.09 | -7.38 | -7.59 | -7.84 | -8.33 | -8.33 |
| 93.06   | -5.26 | -5.34 | -5.78 | -6.12 | -6.61 | -6.93 | -7.35 | -7.62 | -7.84 | -8.03 | -8.31 |
| 99.35   | -5.07 | -5.20 | -5.83 | -6.13 | -6.62 | -6.94 | -7.37 | -7.77 | -7.69 | -8.13 | -8.26 |
| 106.13  | -5.10 | -5.33 | -5.68 | -6.07 | -6.78 | -6.85 | -7.30 | -7.54 | -7.70 | -7.97 | -8.01 |
| 113.45  | -4.93 | -5.36 | -5.73 | -6.11 | -6.45 | -6.90 | -7.12 | -7.47 | -7.74 | -8.02 | -8.05 |
| 121.34  | -5.13 | -5.12 | -5.88 | -6.08 | -6.73 | -6.83 | -7.27 | -7.47 | -7.69 | -7.95 | -8.22 |
| 129.86  | -5.25 | -5.49 | -6.15 | -6.39 | -6.86 | -7.21 | -7.55 | -7.76 | -7.90 | -8.18 | -8.47 |
| 139.04  | -4.88 | -5.19 | -5.54 | -5.85 | -6.36 | -6.65 | -7.07 | -7.33 | -7.49 | -7.82 | -8.02 |
| 148.94  | -5.16 | -5.57 | -5.77 | -6.23 | -6.87 | -7.16 | -7.41 | -7.52 | -7.86 | -8.05 | -8.19 |
| 159.62  | -4.83 | -5.29 | -5.64 | -6.04 | -6.51 | -6.66 | -7.04 | -7.32 | -7.58 | -7.80 | -8.00 |
| 171.14  | -4.45 | -4.95 | -5.30 | -5.70 | -6.24 | -6.39 | -6.88 | -7.04 | -7.29 | -7.65 | -7.56 |
| 183.56  | -5.06 | -5.31 | -5.79 | -6.17 | -6.54 | -6.86 | -7.27 | -7.62 | -7.84 | -7.87 | -8.11 |
| 196.96  | -4.73 | -5.24 | -5.61 | -5.98 | -6.43 | -6.72 | -7.19 | -7.45 | -7.69 | -7.88 | -8.02 |
| 211.41  | -4.96 | -5.14 | -5.59 | -5.93 | -6.36 | -6.75 | -7.15 | -7.34 | -7.56 | -7.71 | -7.98 |
| 226.99  | -4.71 | -5.07 | -5.52 | -6.05 | -6.52 | -6.64 | -7.02 | -7.32 | -7.40 | -7.77 | -7.92 |
| 243.8   | -4.63 | -5.15 | -5.57 | -5.84 | -6.35 | -6.57 | -7.05 | -7.25 | -7.45 | -7.69 | -7.88 |
| 261.93  | -4.76 | -5.00 | -5.48 | -5.93 | -6.37 | -6.51 | -6.90 | -7.10 | -7.47 | -7.63 | -7.87 |
| 281.48  | -4.68 | -5.04 | -5.48 | -5.78 | -6.22 | -6.31 | -6.83 | -7.09 | -7.42 | -7.70 | -7.81 |
| 302.56  | -4.74 | -4.81 | -5.39 | -5.74 | -5.98 | -6.50 | -6.75 | -7.14 | -7.16 | -7.41 | -7.58 |
| 325.3   | -4.81 | -5.21 | -5.58 | -5.70 | -6.29 | -6.57 | -6.85 | -7.18 | -7.52 | -7.69 | -7.67 |
| 349.83  | -4.67 | -4.92 | -5.27 | -5.52 | -5.91 | -6.37 | -6.66 | -6.71 | -7.06 | -7.46 | -7.49 |
| 376.28  | -4.62 | -4.82 | -5.40 | -5.59 | -6.00 | -6.41 | -6.81 | -7.01 | -7.14 | -7.46 | -7.58 |
| 404.81  | -4.28 | -4.43 | -5.12 | -5.25 | -5.59 | -5.86 | -6.34 | -6.49 | -6.72 | -7.05 | -7.01 |
| 435.58  | -4.55 | -4.84 | -5.33 | -5.70 | -6.07 | -6.22 | -6.49 | -6.92 | -7.22 | -7.34 | -7.54 |
| 468.76  | -4.42 | -4.47 | -5.01 | -5.36 | -5.66 | -6.05 | -6.32 | -6.74 | -6.63 | -7.13 | -7.17 |
| 504.55  | -4.24 | -4.55 | -4.89 | -5.22 | -5.52 | -5.91 | -6.19 | -6.36 | -6.80 | -6.91 | -7.02 |
| 543.15  | -4.31 | -4.70 | -4.95 | -5.15 | -5.81 | -6.09 | -6.19 | -6.54 | -6.68 | -6.99 | -7.03 |
| 584.78  | -4.37 | -4.50 | -4.68 | -5.21 | -5.55 | -5.76 | -6.12 | -6.36 | -6.55 | -6.77 | -6.96 |
| 629.68  | -4.19 | -4.31 | -4.71 | -5.11 | -5.39 | -5.58 | -6.07 | -6.19 | -6.67 | -6.61 | -6.89 |
| 678.1   | -3.71 | -4.04 | -4.29 | -4.59 | -5.18 | -5.48 | -5.61 | -5.78 | -6.15 | -6.45 | -6.50 |
| 730.33  | -3.99 | -4.21 | -4.67 | -4.91 | -5.43 | -5.53 | -5.90 | -6.09 | -6.38 | -6.63 | -6.64 |
| 786.65  | -3.90 | -4.29 | -4.68 | -4.84 | -5.18 | -5.57 | -5.69 | -6.09 | -6.21 | -6.43 | -6.77 |
| 847.4   | -4.14 | -4.60 | -4.64 | -5.06 | -5.56 | -5.80 | -6.17 | -6.25 | -6.46 | -6.61 | -6.78 |
| 912.92  | -4.03 | -4.07 | -4.68 | -4.72 | -5.37 | -5.52 | -5.85 | -6.10 | -6.31 | -6.43 | -6.67 |
| 983.58  | -3.87 | -4.12 | -4.28 | -4.71 | -5.19 | -5.40 | -5.75 | -5.94 | -6.15 | -6.22 | -6.46 |
| 1059.78 | -3.79 | -4.03 | -4.44 | -4.67 | -4.99 | -5.33 | -5.61 | -5.75 | -6.23 | -6.35 | -6.28 |
| 1141.98 | -3.49 | -3.78 | -3.96 | -4.39 | -4.86 | -4.93 | -5.23 | -5.58 | -5.72 | -5.90 | -5.97 |

|         |       |       |       |       |       |       |       |       |       |       |       |
|---------|-------|-------|-------|-------|-------|-------|-------|-------|-------|-------|-------|
| 1230.62 | -3.96 | -4.18 | -4.37 | -4.43 | -5.07 | -5.34 | -5.69 | -5.77 | -5.83 | -6.01 | -6.30 |
| 1326.23 | -3.78 | -4.08 | -4.31 | -4.56 | -5.04 | -5.40 | -5.59 | -5.90 | -6.03 | -6.05 | -6.32 |
| 1429.34 | -3.67 | -3.90 | -4.38 | -4.55 | -4.92 | -5.19 | -5.42 | -5.79 | -6.00 | -6.15 | -6.19 |
| 1540.54 | -4.06 | -4.17 | -4.54 | -4.85 | -5.35 | -5.58 | -5.85 | -6.02 | -6.22 | -6.67 | -6.64 |
| 1660.48 | -3.92 | -4.10 | -4.19 | -4.56 | -5.03 | -5.24 | -5.70 | -5.73 | -5.96 | -6.23 | -6.28 |
| 1789.83 | -4.22 | -4.39 | -4.77 | -4.97 | -5.52 | -5.56 | -5.81 | -6.11 | -6.35 | -6.43 | -6.55 |
| 1929.34 | -3.93 | -4.23 | -4.43 | -4.75 | -5.21 | -5.51 | -5.78 | -6.04 | -6.27 | -6.40 | -6.63 |
| 2079.8  | -4.14 | -4.36 | -4.77 | -5.11 | -5.52 | -5.65 | -5.92 | -6.12 | -6.24 | -6.57 | -6.56 |
| 2242.08 | -3.94 | -4.33 | -4.64 | -4.80 | -5.19 | -5.55 | -5.75 | -5.92 | -6.23 | -6.39 | -6.57 |
| 2417.1  | -3.94 | -4.26 | -4.76 | -4.99 | -5.22 | -5.50 | -5.75 | -5.98 | -6.21 | -6.61 | -6.54 |
| 2605.85 | -4.36 | -4.55 | -4.78 | -5.05 | -5.37 | -5.85 | -5.97 | -6.11 | -6.49 | -6.50 | -6.66 |
| 2809.43 | -4.04 | -4.50 | -4.66 | -4.85 | -5.49 | -5.43 | -5.75 | -6.14 | -6.35 | -6.41 | -6.59 |
| 3028.99 | -3.99 | -4.13 | -4.59 | -4.65 | -5.13 | -5.39 | -5.47 | -5.84 | -6.08 | -6.30 | -6.33 |
| 3265.79 | -4.19 | -4.33 | -4.67 | -4.87 | -5.23 | -5.48 | -5.78 | -6.06 | -6.38 | -6.28 | -6.52 |
| 3521.18 | -4.34 | -4.44 | -4.82 | -5.16 | -5.57 | -5.70 | -6.08 | -6.38 | -6.53 | -6.79 | -6.95 |
| 3796.62 | -4.23 | -4.50 | -4.86 | -5.13 | -5.59 | -5.78 | -5.95 | -6.16 | -6.42 | -6.51 | -6.73 |

| Wavelength (nm) \ Time (ps) | 491.14 | 492.55 | 493.96 | 495.36 | 496.77 | 498.18 | 499.59 | 501.00 | 502.41 | 503.82 | 505.22 |
|-----------------------------|--------|--------|--------|--------|--------|--------|--------|--------|--------|--------|--------|
| -3.28                       | 0.18   | 0.14   | 0.14   | 0.11   | 0.19   | 0.18   | 0.18   | 0.30   | 0.11   | 0.07   | 0.16   |
| -2.78                       | -0.04  | 0.07   | -0.01  | 0.06   | 0.03   | 0.08   | -0.05  | 0.03   | 0.08   | 0.12   | 0.08   |
| -2.28                       | 0.02   | 0.09   | 0.06   | 0.16   | 0.09   | 0.11   | 0.12   | 0.12   | 0.18   | 0.24   | 0.15   |
| -1.78                       | 0.01   | 0.01   | -0.03  | -0.08  | -0.01  | -0.03  | -0.02  | 0.01   | 0.02   | -0.01  | -0.01  |
| -1.28                       | -0.21  | -0.21  | -0.25  | -0.28  | -0.31  | -0.28  | -0.10  | -0.26  | -0.27  | -0.33  | -0.15  |
| -0.78                       | 0.04   | -0.04  | 0.03   | 0.02   | -0.04  | -0.02  | -0.06  | 0.03   | -0.09  | -0.02  | -0.08  |
| -0.28                       | -0.17  | -0.25  | -0.23  | -0.19  | -0.28  | -0.23  | -0.31  | -0.38  | -0.29  | -0.44  | -0.43  |
| 0.22                        | 0.16   | 0.18   | 0.30   | 0.21   | 0.33   | 0.19   | 0.25   | 0.16   | 0.25   | 0.37   | 0.27   |
| 0.32                        | 0.04   | 0.12   | 0.06   | 0.12   | 0.18   | 0.10   | 0.19   | 0.07   | 0.12   | 0.19   | 0.02   |
| 0.42                        | -0.23  | -0.19  | -0.17  | -0.26  | -0.01  | -0.26  | -0.32  | -0.26  | -0.17  | -0.11  | -0.15  |
| 0.52                        | -0.30  | -0.18  | -0.28  | -0.32  | -0.21  | -0.36  | -0.28  | -0.33  | -0.23  | -0.13  | -0.32  |
| 0.62                        | 0.15   | 0.24   | 0.09   | 0.18   | 0.21   | 0.29   | 0.07   | 0.12   | 0.19   | 0.09   | 0.23   |
| 0.72                        | -0.41  | -0.37  | -0.41  | -0.23  | -0.28  | -0.35  | -0.36  | -0.28  | -0.35  | -0.23  | -0.38  |
| 0.77                        | 0.15   | 0.18   | 0.20   | 0.26   | 0.17   | 0.13   | 0.33   | 0.19   | 0.21   | 0.15   | 0.29   |
| 0.82                        | 0.16   | 0.23   | 0.30   | 0.24   | 0.30   | 0.19   | 0.21   | 0.25   | 0.33   | 0.33   | 0.19   |
| 0.87                        | 0.16   | 0.10   | -0.04  | -0.04  | 0.11   | 0.02   | 0.07   | 0.03   | 0.00   | 0.01   | -0.04  |
| 0.92                        | 0.03   | -0.06  | -0.06  | -0.02  | -0.01  | 0.04   | -0.09  | 0.02   | -0.13  | -0.04  | -0.13  |
| 0.97                        | -0.20  | 0.02   | -0.12  | 0.00   | -0.22  | 0.04   | -0.12  | -0.27  | -0.06  | -0.06  | 0.03   |
| 1.02                        | 0.10   | 0.20   | -0.01  | -0.06  | 0.08   | 0.02   | -0.12  | 0.01   | 0.11   | 0.17   | 0.04   |
| 1.07                        | -0.05  | 0.07   | 0.00   | -0.07  | 0.16   | 0.17   | -0.07  | -0.02  | -0.04  | -0.03  | 0.00   |
| 1.12                        | -0.17  | -0.29  | -0.27  | -0.19  | -0.12  | -0.29  | -0.11  | -0.16  | -0.25  | -0.17  | -0.20  |
| 1.17                        | -0.34  | -0.20  | -0.07  | -0.26  | -0.19  | -0.26  | -0.21  | -0.33  | -0.22  | -0.27  | -0.22  |
| 1.22                        | 0.03   | 0.06   | 0.10   | 0.09   | 0.22   | 0.11   | 0.08   | 0.14   | 0.26   | 0.00   | 0.19   |
| 1.27                        | -0.54  | -0.29  | -0.42  | -0.16  | -0.24  | -0.07  | -0.09  | -0.17  | -0.09  | -0.09  | -0.09  |
| 1.32                        | -0.63  | -0.62  | -0.54  | -0.56  | -0.42  | -0.38  | -0.42  | -0.28  | -0.40  | -0.36  | -0.42  |
| 1.37                        | 0.05   | 0.03   | -0.13  | -0.15  | -0.22  | -0.18  | -0.24  | -0.27  | -0.22  | -0.41  | -0.46  |
| 1.42                        | -1.16  | -1.08  | -0.91  | -0.65  | -0.51  | -0.40  | -0.28  | -0.09  | 0.03   | 0.29   | 0.18   |
| 1.47                        | -9.21  | -9.24  | -9.37  | -9.15  | -9.01  | -8.79  | -8.50  | -8.19  | -7.84  | -7.43  | -7.02  |
| 1.52                        | -12.17 | -12.37 | -12.61 | -12.84 | -12.99 | -12.93 | -12.96 | -12.91 | -12.60 | -12.46 | -12.17 |

|      |        |        |        |        |        |        |        |        |        |        |        |
|------|--------|--------|--------|--------|--------|--------|--------|--------|--------|--------|--------|
| 1.57 | -13.49 | -13.87 | -14.30 | -14.41 | -14.76 | -14.94 | -14.95 | -15.05 | -14.99 | -15.10 | -14.98 |
| 1.62 | -13.14 | -13.71 | -14.19 | -14.45 | -14.66 | -14.95 | -15.19 | -15.26 | -15.32 | -15.39 | -15.38 |
| 1.67 | -12.66 | -13.03 | -13.27 | -13.61 | -13.99 | -14.11 | -14.43 | -14.47 | -14.42 | -14.50 | -14.60 |
| 1.72 | -11.50 | -11.69 | -12.23 | -12.42 | -12.62 | -12.67 | -12.80 | -12.88 | -12.86 | -13.01 | -13.01 |
| 1.77 | -11.09 | -11.45 | -11.75 | -11.89 | -11.99 | -12.22 | -12.28 | -12.24 | -12.24 | -12.15 | -12.32 |
| 1.82 | -11.13 | -11.28 | -11.68 | -11.68 | -11.86 | -11.94 | -12.08 | -12.04 | -11.93 | -11.83 | -11.91 |
| 1.87 | -10.66 | -11.04 | -11.14 | -11.29 | -11.48 | -11.43 | -11.64 | -11.46 | -11.55 | -11.41 | -11.33 |
| 1.92 | -10.28 | -10.44 | -10.81 | -10.94 | -11.06 | -11.27 | -11.25 | -11.18 | -10.99 | -10.98 | -10.92 |
| 1.97 | -10.45 | -10.70 | -10.84 | -11.03 | -10.94 | -11.08 | -11.15 | -11.26 | -10.85 | -10.79 | -10.67 |
| 2.02 | -9.97  | -10.13 | -10.36 | -10.48 | -10.60 | -10.55 | -10.54 | -10.37 | -10.34 | -10.20 | -10.08 |
| 2.07 | -10.22 | -10.29 | -10.51 | -10.51 | -10.61 | -10.65 | -10.52 | -10.60 | -10.28 | -10.23 | -10.12 |
| 2.12 | -9.78  | -9.95  | -10.08 | -10.22 | -10.46 | -10.37 | -10.49 | -10.40 | -10.12 | -9.85  | -9.79  |
| 2.17 | -9.65  | -9.76  | -9.95  | -9.99  | -9.94  | -10.14 | -10.11 | -9.86  | -9.71  | -9.51  | -9.50  |
| 2.22 | -9.24  | -9.38  | -9.66  | -9.89  | -9.75  | -9.73  | -9.62  | -9.60  | -9.44  | -9.31  | -9.15  |
| 2.27 | -9.11  | -9.37  | -9.41  | -9.55  | -9.51  | -9.41  | -9.55  | -9.46  | -9.08  | -8.95  | -8.88  |
| 2.32 | -9.48  | -9.57  | -9.83  | -9.85  | -9.92  | -9.88  | -9.81  | -9.75  | -9.42  | -9.27  | -9.13  |
| 2.37 | -9.34  | -9.54  | -9.77  | -9.68  | -9.79  | -9.73  | -9.61  | -9.36  | -9.25  | -9.07  | -8.98  |
| 2.42 | -9.33  | -9.43  | -9.67  | -9.50  | -9.59  | -9.52  | -9.54  | -9.49  | -9.31  | -8.92  | -8.78  |
| 2.47 | -9.16  | -9.20  | -9.42  | -9.54  | -9.46  | -9.40  | -9.28  | -9.29  | -8.95  | -8.89  | -8.75  |
| 2.52 | -9.27  | -9.44  | -9.53  | -9.47  | -9.50  | -9.50  | -9.36  | -9.16  | -9.01  | -8.81  | -8.62  |
| 2.57 | -9.25  | -9.22  | -9.46  | -9.35  | -9.38  | -9.28  | -9.27  | -9.18  | -8.86  | -8.61  | -8.53  |
| 2.62 | -9.49  | -9.57  | -9.73  | -9.74  | -9.75  | -9.83  | -9.51  | -9.31  | -9.14  | -8.85  | -8.70  |
| 2.67 | -9.23  | -9.32  | -9.33  | -9.46  | -9.52  | -9.38  | -9.15  | -9.10  | -8.84  | -8.59  | -8.41  |
| 2.72 | -9.01  | -9.29  | -9.21  | -9.39  | -9.40  | -9.25  | -9.18  | -9.11  | -8.82  | -8.50  | -8.27  |
| 2.77 | -9.76  | -9.70  | -9.82  | -9.78  | -9.80  | -9.73  | -9.68  | -9.44  | -9.25  | -9.01  | -8.89  |
| 2.82 | -8.88  | -9.00  | -9.22  | -9.10  | -9.02  | -8.85  | -8.86  | -8.66  | -8.38  | -8.21  | -7.98  |
| 2.87 | -9.09  | -9.25  | -9.31  | -9.35  | -9.38  | -9.22  | -9.19  | -8.70  | -8.59  | -8.40  | -8.27  |
| 2.92 | -9.14  | -9.21  | -9.36  | -9.29  | -9.26  | -9.22  | -9.05  | -8.83  | -8.53  | -8.24  | -8.01  |
| 2.97 | -9.59  | -9.73  | -9.92  | -9.86  | -9.83  | -9.83  | -9.58  | -9.44  | -9.08  | -8.94  | -8.70  |
| 3.02 | -9.34  | -9.43  | -9.45  | -9.58  | -9.31  | -9.41  | -9.28  | -9.02  | -8.79  | -8.64  | -8.46  |
| 3.07 | -9.06  | -9.10  | -9.20  | -9.26  | -9.10  | -9.16  | -8.92  | -8.68  | -8.44  | -8.15  | -8.05  |
| 3.12 | -9.25  | -9.25  | -9.53  | -9.31  | -9.23  | -9.19  | -9.03  | -8.80  | -8.48  | -8.23  | -7.98  |
| 3.17 | -9.20  | -9.22  | -9.37  | -9.50  | -9.28  | -9.12  | -9.06  | -8.70  | -8.52  | -8.29  | -8.19  |
| 3.22 | -9.20  | -9.18  | -9.30  | -9.24  | -9.08  | -9.06  | -8.93  | -8.76  | -8.47  | -8.24  | -7.96  |
| 3.27 | -9.00  | -9.10  | -9.15  | -9.19  | -9.17  | -9.06  | -8.94  | -8.65  | -8.20  | -8.03  | -7.85  |
| 3.32 | -8.78  | -8.91  | -9.06  | -8.89  | -8.82  | -8.83  | -8.63  | -8.52  | -8.10  | -7.99  | -7.71  |
| 3.37 | -8.98  | -9.14  | -9.28  | -9.05  | -9.13  | -9.06  | -8.79  | -8.72  | -8.21  | -8.19  | -7.90  |
| 3.42 | -9.15  | -9.13  | -9.23  | -8.98  | -8.91  | -8.92  | -8.77  | -8.42  | -8.18  | -7.89  | -7.69  |
| 3.47 | -8.87  | -9.04  | -9.11  | -9.04  | -8.93  | -8.90  | -8.65  | -8.51  | -8.04  | -7.87  | -7.52  |
| 3.52 | -9.14  | -9.44  | -9.49  | -9.39  | -9.43  | -9.21  | -8.98  | -8.75  | -8.52  | -8.26  | -8.11  |
| 3.57 | -9.08  | -9.18  | -9.40  | -9.33  | -9.20  | -9.21  | -9.09  | -8.65  | -8.36  | -8.10  | -7.92  |
| 3.62 | -9.20  | -9.21  | -9.29  | -9.30  | -9.20  | -9.00  | -8.95  | -8.68  | -8.33  | -8.04  | -7.94  |
| 3.67 | -9.21  | -9.23  | -9.17  | -9.27  | -9.13  | -9.07  | -8.82  | -8.65  | -8.35  | -8.05  | -7.87  |
| 3.72 | -8.91  | -8.91  | -8.92  | -8.96  | -8.64  | -8.56  | -8.60  | -8.21  | -7.94  | -7.70  | -7.31  |
| 3.92 | -8.76  | -8.75  | -8.94  | -8.92  | -8.73  | -8.57  | -8.48  | -8.23  | -7.82  | -7.52  | -7.37  |
| 4.12 | -8.91  | -8.97  | -9.02  | -8.97  | -8.84  | -8.81  | -8.49  | -8.39  | -8.03  | -7.73  | -7.42  |
| 4.32 | -9.10  | -9.19  | -9.19  | -9.19  | -9.06  | -8.94  | -8.57  | -8.65  | -8.34  | -8.03  | -7.72  |
| 4.52 | -8.71  | -8.75  | -8.82  | -8.85  | -8.57  | -8.64  | -8.47  | -8.28  | -7.95  | -7.47  | -7.24  |
| 4.72 | -8.63  | -8.69  | -8.89  | -8.79  | -8.75  | -8.61  | -8.41  | -8.00  | -7.85  | -7.49  | -7.16  |
| 4.92 | -8.97  | -8.94  | -8.90  | -8.87  | -8.92  | -8.82  | -8.58  | -8.35  | -7.89  | -7.58  | -7.41  |



|       |       |       |       |       |       |       |       |       |       |       |       |
|-------|-------|-------|-------|-------|-------|-------|-------|-------|-------|-------|-------|
| 5.12  | -9.04 | -9.06 | -9.26 | -9.06 | -9.03 | -8.91 | -8.76 | -8.33 | -8.20 | -7.78 | -7.52 |
| 5.32  | -9.18 | -9.22 | -9.26 | -9.08 | -8.96 | -8.95 | -8.76 | -8.46 | -8.11 | -7.78 | -7.48 |
| 5.52  | -8.68 | -8.64 | -8.77 | -8.73 | -8.66 | -8.56 | -8.41 | -7.99 | -7.82 | -7.44 | -7.14 |
| 5.72  | -9.23 | -9.26 | -9.34 | -9.33 | -9.01 | -9.01 | -8.75 | -8.38 | -8.11 | -7.72 | -7.62 |
| 5.92  | -8.60 | -8.69 | -8.77 | -8.63 | -8.46 | -8.18 | -8.01 | -7.89 | -7.52 | -7.16 | -6.92 |
| 6.12  | -8.97 | -9.02 | -8.97 | -8.84 | -8.82 | -8.61 | -8.33 | -8.15 | -7.82 | -7.38 | -7.19 |
| 6.32  | -8.91 | -8.92 | -9.14 | -8.83 | -8.67 | -8.58 | -8.48 | -8.01 | -7.80 | -7.55 | -7.22 |
| 6.52  | -8.73 | -8.64 | -8.85 | -8.69 | -8.58 | -8.48 | -8.15 | -7.91 | -7.59 | -7.23 | -7.08 |
| 6.72  | -8.77 | -8.98 | -8.97 | -8.95 | -8.69 | -8.71 | -8.37 | -8.01 | -7.82 | -7.45 | -7.21 |
| 6.92  | -8.65 | -8.72 | -8.64 | -8.60 | -8.46 | -8.28 | -7.97 | -7.82 | -7.47 | -7.21 | -6.70 |
| 7.12  | -8.29 | -8.24 | -8.28 | -8.12 | -7.93 | -7.80 | -7.51 | -7.35 | -6.98 | -6.63 | -6.39 |
| 7.32  | -8.60 | -8.53 | -8.58 | -8.57 | -8.44 | -8.29 | -8.03 | -7.84 | -7.57 | -7.10 | -6.87 |
| 7.52  | -8.65 | -8.49 | -8.59 | -8.50 | -8.36 | -8.26 | -8.06 | -7.68 | -7.43 | -7.21 | -6.84 |
| 7.72  | -8.89 | -8.92 | -8.89 | -8.83 | -8.70 | -8.58 | -8.54 | -8.08 | -7.69 | -7.38 | -7.15 |
| 7.92  | -8.66 | -8.63 | -8.75 | -8.71 | -8.32 | -8.29 | -8.06 | -7.77 | -7.38 | -7.14 | -6.79 |
| 8.12  | -8.58 | -8.58 | -8.54 | -8.41 | -8.33 | -8.16 | -7.88 | -7.66 | -7.32 | -6.94 | -6.66 |
| 8.32  | -8.52 | -8.52 | -8.53 | -8.44 | -8.30 | -8.17 | -7.85 | -7.58 | -7.19 | -6.90 | -6.70 |
| 8.52  | -8.69 | -8.68 | -8.79 | -8.66 | -8.43 | -8.45 | -8.10 | -7.74 | -7.37 | -7.14 | -6.87 |
| 8.72  | -8.64 | -8.71 | -8.74 | -8.62 | -8.55 | -8.24 | -8.10 | -7.82 | -7.37 | -7.16 | -6.87 |
| 8.92  | -8.87 | -8.92 | -9.02 | -8.84 | -8.72 | -8.63 | -8.37 | -8.11 | -7.76 | -7.27 | -7.19 |
| 9.12  | -8.69 | -8.79 | -8.87 | -8.72 | -8.54 | -8.26 | -8.08 | -7.95 | -7.48 | -7.13 | -6.89 |
| 9.32  | -9.10 | -9.09 | -9.06 | -8.96 | -8.73 | -8.74 | -8.49 | -8.05 | -7.69 | -7.42 | -7.30 |
| 9.52  | -8.74 | -8.74 | -8.75 | -8.57 | -8.55 | -8.38 | -8.17 | -7.86 | -7.48 | -7.11 | -6.80 |
| 9.72  | -8.85 | -8.85 | -8.94 | -8.75 | -8.58 | -8.46 | -8.25 | -7.91 | -7.62 | -7.25 | -6.91 |
| 9.92  | -8.94 | -8.87 | -8.97 | -8.91 | -8.62 | -8.61 | -8.35 | -8.16 | -7.82 | -7.48 | -7.14 |
| 10.12 | -8.37 | -8.57 | -8.51 | -8.51 | -8.23 | -8.06 | -7.83 | -7.55 | -7.17 | -6.83 | -6.63 |
| 10.32 | -8.49 | -8.39 | -8.45 | -8.34 | -8.13 | -7.98 | -7.79 | -7.52 | -7.13 | -6.85 | -6.64 |
| 10.52 | -8.63 | -8.47 | -8.71 | -8.67 | -8.37 | -8.14 | -7.87 | -7.56 | -7.26 | -6.97 | -6.75 |
| 10.72 | -8.47 | -8.52 | -8.50 | -8.47 | -8.29 | -8.13 | -8.06 | -7.82 | -7.32 | -7.00 | -6.65 |
| 10.92 | -8.49 | -8.54 | -8.66 | -8.55 | -8.43 | -8.18 | -7.91 | -7.82 | -7.32 | -7.15 | -6.68 |
| 11.12 | -8.77 | -8.74 | -8.81 | -8.72 | -8.57 | -8.47 | -8.20 | -7.88 | -7.56 | -7.31 | -6.95 |
| 11.32 | -8.49 | -8.53 | -8.49 | -8.46 | -8.23 | -8.05 | -7.81 | -7.51 | -7.21 | -6.97 | -6.66 |
| 11.52 | -8.23 | -8.07 | -8.12 | -8.04 | -7.89 | -7.72 | -7.43 | -7.15 | -6.82 | -6.51 | -6.21 |
| 11.72 | -8.29 | -8.57 | -8.53 | -8.28 | -8.17 | -8.02 | -7.66 | -7.46 | -7.15 | -6.91 | -6.51 |
| 11.92 | -8.03 | -8.05 | -8.22 | -8.04 | -7.81 | -7.66 | -7.36 | -7.10 | -6.82 | -6.43 | -6.03 |
| 12.12 | -7.86 | -7.75 | -7.82 | -7.73 | -7.65 | -7.49 | -7.26 | -7.00 | -6.73 | -6.29 | -6.06 |
| 12.32 | -8.60 | -8.64 | -8.57 | -8.53 | -8.32 | -8.16 | -7.88 | -7.47 | -7.29 | -6.88 | -6.59 |
| 12.52 | -8.29 | -8.45 | -8.25 | -8.15 | -7.96 | -7.82 | -7.52 | -7.25 | -6.89 | -6.64 | -6.14 |
| 12.72 | -8.78 | -8.67 | -8.77 | -8.69 | -8.56 | -8.37 | -8.31 | -7.89 | -7.56 | -7.07 | -6.90 |
| 12.92 | -8.51 | -8.60 | -8.59 | -8.52 | -8.07 | -8.15 | -7.85 | -7.67 | -7.23 | -6.93 | -6.56 |
| 13.12 | -8.39 | -8.28 | -8.30 | -8.32 | -8.00 | -7.93 | -7.78 | -7.29 | -7.10 | -6.77 | -6.43 |
| 13.32 | -8.90 | -8.96 | -9.09 | -8.89 | -8.75 | -8.62 | -8.23 | -8.09 | -7.56 | -7.27 | -7.01 |
| 13.52 | -8.55 | -8.53 | -8.58 | -8.41 | -8.22 | -8.11 | -7.74 | -7.63 | -7.17 | -6.81 | -6.49 |
| 13.72 | -8.28 | -8.22 | -8.37 | -8.27 | -8.06 | -7.87 | -7.55 | -7.32 | -7.00 | -6.75 | -6.34 |
| 13.92 | -8.62 | -8.80 | -8.86 | -8.56 | -8.43 | -8.28 | -7.96 | -7.79 | -7.33 | -7.14 | -6.76 |
| 14    | -8.38 | -8.35 | -8.51 | -8.38 | -8.14 | -8.10 | -7.81 | -7.37 | -7.12 | -6.80 | -6.42 |
| 14.08 | -8.46 | -8.55 | -8.66 | -8.44 | -8.49 | -8.08 | -7.93 | -7.67 | -7.20 | -6.96 | -6.54 |
| 14.17 | -8.25 | -8.19 | -8.19 | -8.09 | -7.96 | -7.78 | -7.48 | -7.25 | -6.91 | -6.53 | -6.33 |
| 14.27 | -8.51 | -8.58 | -8.42 | -8.25 | -8.34 | -7.93 | -7.73 | -7.61 | -7.08 | -6.77 | -6.42 |
| 14.38 | -8.54 | -8.57 | -8.48 | -8.39 | -8.25 | -8.08 | -7.85 | -7.49 | -7.17 | -6.88 | -6.47 |

|       |       |       |       |       |       |       |       |       |       |       |       |
|-------|-------|-------|-------|-------|-------|-------|-------|-------|-------|-------|-------|
| 14.49 | -8.38 | -8.23 | -8.44 | -8.16 | -8.14 | -7.99 | -7.78 | -7.42 | -7.13 | -6.83 | -6.48 |
| 14.61 | -8.60 | -8.66 | -8.56 | -8.59 | -8.62 | -8.26 | -7.91 | -7.78 | -7.41 | -7.01 | -6.75 |
| 14.75 | -8.54 | -8.47 | -8.59 | -8.43 | -8.18 | -8.10 | -7.79 | -7.54 | -7.25 | -7.01 | -6.65 |
| 14.89 | -8.51 | -8.47 | -8.43 | -8.43 | -8.34 | -8.21 | -7.83 | -7.64 | -7.21 | -6.78 | -6.37 |
| 15.05 | -8.45 | -8.39 | -8.41 | -8.26 | -8.16 | -7.99 | -7.80 | -7.55 | -7.07 | -6.73 | -6.43 |
| 15.21 | -8.52 | -8.54 | -8.48 | -8.34 | -8.33 | -8.11 | -7.97 | -7.41 | -7.21 | -6.88 | -6.51 |
| 15.39 | -8.52 | -8.39 | -8.46 | -8.51 | -8.24 | -8.10 | -7.84 | -7.61 | -7.23 | -6.87 | -6.52 |
| 15.59 | -8.62 | -8.66 | -8.56 | -8.57 | -8.26 | -8.25 | -7.93 | -7.57 | -7.35 | -7.01 | -6.70 |
| 15.8  | -8.38 | -8.40 | -8.25 | -8.19 | -8.03 | -7.78 | -7.62 | -7.42 | -6.91 | -6.65 | -6.42 |
| 16.02 | -8.33 | -8.18 | -8.19 | -8.10 | -7.92 | -7.70 | -7.38 | -7.24 | -6.90 | -6.50 | -6.26 |
| 16.27 | -8.45 | -8.38 | -8.42 | -8.41 | -8.01 | -7.82 | -7.62 | -7.46 | -6.91 | -6.55 | -6.40 |
| 16.53 | -8.31 | -8.28 | -8.24 | -8.16 | -7.92 | -7.72 | -7.56 | -7.31 | -6.81 | -6.53 | -6.25 |
| 16.81 | -8.62 | -8.52 | -8.59 | -8.56 | -8.35 | -8.17 | -7.98 | -7.60 | -7.22 | -7.03 | -6.49 |
| 17.12 | -8.32 | -8.48 | -8.35 | -8.34 | -8.11 | -7.98 | -7.75 | -7.34 | -7.03 | -6.69 | -6.38 |
| 17.45 | -8.39 | -8.49 | -8.55 | -8.43 | -8.17 | -7.90 | -7.76 | -7.47 | -7.05 | -6.82 | -6.58 |
| 17.81 | -8.39 | -8.30 | -8.24 | -8.12 | -7.93 | -7.92 | -7.59 | -7.21 | -6.95 | -6.49 | -6.22 |
| 18.19 | -8.29 | -8.37 | -8.43 | -8.16 | -8.11 | -7.88 | -7.64 | -7.45 | -6.94 | -6.69 | -6.32 |
| 18.6  | -8.33 | -8.31 | -8.37 | -8.13 | -7.98 | -7.88 | -7.57 | -7.39 | -6.94 | -6.65 | -6.26 |
| 19.05 | -8.81 | -8.78 | -8.78 | -8.80 | -8.51 | -8.37 | -8.11 | -7.83 | -7.38 | -7.07 | -6.78 |
| 19.53 | -8.16 | -8.36 | -8.31 | -8.16 | -7.93 | -7.84 | -7.43 | -7.25 | -7.04 | -6.58 | -6.23 |
| 20.05 | -8.39 | -8.34 | -8.34 | -8.10 | -7.93 | -7.83 | -7.67 | -7.35 | -6.90 | -6.62 | -6.36 |
| 20.61 | -8.35 | -8.24 | -8.26 | -8.26 | -8.09 | -7.81 | -7.60 | -7.42 | -6.99 | -6.67 | -6.46 |
| 21.22 | -8.58 | -8.52 | -8.69 | -8.38 | -8.33 | -8.12 | -7.79 | -7.41 | -7.34 | -6.95 | -6.49 |
| 21.87 | -8.42 | -8.32 | -8.27 | -8.11 | -8.13 | -7.84 | -7.63 | -7.21 | -6.89 | -6.57 | -6.21 |
| 22.57 | -8.46 | -8.45 | -8.46 | -8.36 | -8.18 | -8.03 | -7.81 | -7.52 | -7.23 | -6.89 | -6.55 |
| 23.33 | -8.00 | -8.18 | -8.10 | -7.95 | -7.87 | -7.84 | -7.42 | -7.13 | -6.62 | -6.47 | -6.13 |
| 24.15 | -8.14 | -8.08 | -8.13 | -8.09 | -7.84 | -7.69 | -7.35 | -7.03 | -6.69 | -6.36 | -6.07 |
| 25.03 | -8.31 | -8.18 | -8.30 | -8.05 | -7.91 | -7.88 | -7.54 | -7.35 | -6.80 | -6.58 | -6.16 |
| 25.98 | -8.59 | -8.64 | -8.68 | -8.63 | -8.41 | -8.25 | -7.99 | -7.65 | -7.43 | -7.07 | -6.67 |
| 27.01 | -8.65 | -8.73 | -8.72 | -8.56 | -8.38 | -8.23 | -7.94 | -7.72 | -7.39 | -7.07 | -6.68 |
| 28.11 | -8.20 | -8.27 | -8.20 | -8.01 | -8.00 | -7.72 | -7.52 | -7.23 | -6.76 | -6.56 | -6.21 |
| 29.3  | -8.74 | -8.80 | -8.74 | -8.61 | -8.38 | -8.22 | -8.05 | -7.76 | -7.29 | -6.92 | -6.53 |
| 30.59 | -8.04 | -7.81 | -7.99 | -7.90 | -7.56 | -7.50 | -7.28 | -7.05 | -6.61 | -6.33 | -5.96 |
| 31.98 | -8.34 | -8.35 | -8.22 | -8.05 | -7.91 | -7.84 | -7.62 | -7.29 | -6.95 | -6.69 | -6.29 |
| 33.47 | -8.10 | -8.06 | -8.13 | -8.03 | -7.91 | -7.68 | -7.47 | -7.26 | -6.74 | -6.44 | -6.00 |
| 35.09 | -8.26 | -8.24 | -8.11 | -8.19 | -7.86 | -7.75 | -7.43 | -7.18 | -6.84 | -6.40 | -6.16 |
| 36.83 | -8.21 | -8.31 | -8.35 | -8.18 | -7.88 | -7.76 | -7.69 | -7.24 | -6.93 | -6.52 | -6.19 |
| 38.71 | -8.26 | -8.32 | -8.16 | -8.00 | -8.01 | -7.74 | -7.45 | -7.22 | -6.93 | -6.59 | -6.11 |
| 40.73 | -8.36 | -8.39 | -8.34 | -8.14 | -8.06 | -7.87 | -7.67 | -7.28 | -6.95 | -6.72 | -6.31 |
| 42.92 | -8.44 | -8.39 | -8.48 | -8.40 | -8.10 | -8.01 | -7.74 | -7.31 | -6.96 | -6.54 | -6.34 |
| 45.27 | -8.49 | -8.45 | -8.45 | -8.27 | -8.27 | -7.95 | -7.67 | -7.47 | -7.09 | -6.83 | -6.55 |
| 47.81 | -8.73 | -8.65 | -8.69 | -8.48 | -8.48 | -8.24 | -8.07 | -7.77 | -7.51 | -7.03 | -6.78 |
| 50.55 | -8.49 | -8.37 | -8.46 | -8.28 | -7.92 | -8.00 | -7.70 | -7.31 | -6.96 | -6.67 | -6.23 |
| 53.51 | -8.53 | -8.38 | -8.45 | -8.20 | -8.18 | -8.04 | -7.79 | -7.45 | -6.96 | -6.79 | -6.43 |
| 56.69 | -8.51 | -8.65 | -8.64 | -8.47 | -8.30 | -8.02 | -7.87 | -7.55 | -7.05 | -6.73 | -6.42 |
| 60.13 | -8.24 | -8.31 | -8.29 | -8.34 | -8.08 | -7.98 | -7.77 | -7.39 | -6.97 | -6.55 | -6.19 |
| 63.84 | -8.46 | -8.46 | -8.50 | -8.47 | -8.10 | -8.09 | -7.70 | -7.50 | -7.25 | -6.83 | -6.39 |
| 67.83 | -8.81 | -8.69 | -8.82 | -8.64 | -8.50 | -8.27 | -8.10 | -7.80 | -7.34 | -7.04 | -6.83 |
| 72.15 | -8.29 | -8.43 | -8.39 | -8.29 | -8.14 | -7.94 | -7.78 | -7.46 | -7.21 | -6.68 | -6.43 |
| 76.8  | -8.28 | -8.24 | -8.37 | -8.13 | -8.02 | -7.88 | -7.64 | -7.34 | -6.96 | -6.60 | -6.34 |

|         |       |       |       |       |       |       |       |       |       |       |       |
|---------|-------|-------|-------|-------|-------|-------|-------|-------|-------|-------|-------|
| 81.81   | -8.17 | -8.29 | -8.34 | -8.20 | -7.91 | -7.83 | -7.57 | -7.29 | -6.92 | -6.55 | -6.29 |
| 87.22   | -8.40 | -8.33 | -8.38 | -8.31 | -8.17 | -7.79 | -7.60 | -7.43 | -6.99 | -6.63 | -6.19 |
| 93.06   | -8.38 | -8.28 | -8.39 | -8.26 | -8.18 | -7.98 | -7.78 | -7.38 | -7.13 | -6.76 | -6.49 |
| 99.35   | -8.29 | -8.48 | -8.40 | -8.28 | -8.14 | -7.96 | -7.74 | -7.42 | -7.02 | -6.72 | -6.32 |
| 106.13  | -8.22 | -8.35 | -8.15 | -8.24 | -7.93 | -7.81 | -7.46 | -7.26 | -6.88 | -6.60 | -6.21 |
| 113.45  | -8.27 | -8.20 | -8.20 | -8.19 | -7.98 | -7.87 | -7.55 | -7.21 | -6.86 | -6.59 | -6.22 |
| 121.34  | -8.30 | -8.28 | -8.32 | -8.21 | -8.01 | -7.77 | -7.66 | -7.48 | -7.07 | -6.82 | -6.42 |
| 129.86  | -8.49 | -8.58 | -8.59 | -8.33 | -8.24 | -8.24 | -7.93 | -7.67 | -7.24 | -7.06 | -6.68 |
| 139.04  | -8.06 | -7.99 | -8.12 | -8.07 | -7.89 | -7.68 | -7.53 | -7.23 | -6.80 | -6.43 | -6.16 |
| 148.94  | -8.44 | -8.29 | -8.41 | -8.30 | -7.99 | -7.87 | -7.74 | -7.33 | -6.98 | -6.61 | -6.14 |
| 159.62  | -8.16 | -8.06 | -8.03 | -8.10 | -7.86 | -7.66 | -7.40 | -7.17 | -6.72 | -6.47 | -6.18 |
| 171.14  | -7.80 | -7.78 | -7.83 | -7.70 | -7.64 | -7.39 | -7.31 | -7.00 | -6.56 | -6.25 | -6.04 |
| 183.56  | -8.31 | -8.27 | -8.31 | -8.20 | -8.03 | -7.90 | -7.64 | -7.37 | -6.93 | -6.74 | -6.39 |
| 196.96  | -8.26 | -8.25 | -8.19 | -8.12 | -7.84 | -7.83 | -7.60 | -7.40 | -6.98 | -6.68 | -6.30 |
| 211.41  | -8.06 | -8.15 | -8.04 | -8.02 | -7.97 | -7.77 | -7.54 | -7.27 | -6.93 | -6.57 | -6.32 |
| 226.99  | -7.90 | -7.98 | -8.12 | -7.93 | -7.74 | -7.62 | -7.55 | -7.15 | -6.91 | -6.45 | -6.11 |
| 243.8   | -8.12 | -7.96 | -8.09 | -7.91 | -7.64 | -7.65 | -7.44 | -7.09 | -6.83 | -6.56 | -6.12 |
| 261.93  | -8.01 | -7.95 | -7.98 | -7.90 | -7.71 | -7.60 | -7.38 | -7.25 | -6.82 | -6.47 | -6.25 |
| 281.48  | -7.83 | -7.81 | -7.94 | -7.79 | -7.62 | -7.57 | -7.21 | -7.10 | -6.67 | -6.39 | -5.92 |
| 302.56  | -7.74 | -7.86 | -7.69 | -7.81 | -7.62 | -7.42 | -7.31 | -7.04 | -6.74 | -6.30 | -6.07 |
| 325.3   | -7.88 | -7.93 | -7.85 | -7.89 | -7.68 | -7.51 | -7.28 | -6.98 | -6.68 | -6.30 | -5.99 |
| 349.83  | -7.57 | -7.56 | -7.57 | -7.54 | -7.39 | -7.24 | -6.97 | -6.82 | -6.40 | -6.07 | -5.91 |
| 376.28  | -7.82 | -7.65 | -7.73 | -7.60 | -7.45 | -7.44 | -7.26 | -6.92 | -6.62 | -6.30 | -5.94 |
| 404.81  | -7.23 | -7.31 | -7.32 | -7.34 | -7.26 | -7.02 | -6.81 | -6.51 | -6.20 | -5.88 | -5.65 |
| 435.58  | -7.57 | -7.50 | -7.66 | -7.63 | -7.55 | -7.26 | -7.12 | -6.81 | -6.63 | -6.28 | -5.94 |
| 468.76  | -7.24 | -7.27 | -7.35 | -7.33 | -7.12 | -7.13 | -6.88 | -6.63 | -6.27 | -5.95 | -5.65 |
| 504.55  | -7.17 | -7.05 | -7.25 | -7.09 | -6.85 | -7.03 | -6.77 | -6.45 | -6.09 | -5.70 | -5.58 |
| 543.15  | -7.17 | -7.29 | -7.24 | -7.14 | -7.11 | -7.01 | -6.71 | -6.60 | -6.25 | -5.77 | -5.50 |
| 584.78  | -7.12 | -7.21 | -7.09 | -7.04 | -6.93 | -6.87 | -6.65 | -6.30 | -5.97 | -5.77 | -5.33 |
| 629.68  | -6.95 | -7.07 | -7.13 | -6.90 | -6.81 | -6.81 | -6.56 | -6.36 | -6.05 | -5.57 | -5.42 |
| 678.1   | -6.69 | -6.62 | -6.71 | -6.66 | -6.54 | -6.44 | -6.14 | -5.89 | -5.62 | -5.25 | -4.96 |
| 730.33  | -6.85 | -6.92 | -7.04 | -6.81 | -6.71 | -6.62 | -6.44 | -6.16 | -5.81 | -5.59 | -5.31 |
| 786.65  | -6.77 | -6.86 | -6.86 | -6.74 | -6.73 | -6.56 | -6.32 | -6.12 | -5.78 | -5.47 | -5.29 |
| 847.4   | -7.02 | -6.96 | -6.95 | -7.00 | -6.89 | -6.75 | -6.48 | -6.34 | -5.88 | -5.67 | -5.38 |
| 912.92  | -6.75 | -6.70 | -6.94 | -6.72 | -6.73 | -6.38 | -6.32 | -6.14 | -5.79 | -5.50 | -5.12 |
| 983.58  | -6.69 | -6.52 | -6.72 | -6.62 | -6.60 | -6.47 | -6.30 | -6.11 | -5.75 | -5.39 | -5.14 |
| 1059.78 | -6.68 | -6.57 | -6.62 | -6.54 | -6.56 | -6.43 | -6.16 | -5.89 | -5.61 | -5.30 | -5.08 |
| 1141.98 | -6.12 | -6.12 | -6.21 | -5.96 | -5.98 | -6.06 | -5.73 | -5.52 | -5.19 | -5.06 | -4.69 |
| 1230.62 | -6.35 | -6.40 | -6.63 | -6.52 | -6.32 | -6.27 | -6.00 | -5.75 | -5.42 | -5.21 | -4.90 |
| 1326.23 | -6.52 | -6.51 | -6.59 | -6.55 | -6.56 | -6.29 | -6.09 | -5.96 | -5.57 | -5.20 | -4.96 |
| 1429.34 | -6.52 | -6.37 | -6.41 | -6.33 | -6.26 | -6.09 | -5.95 | -5.68 | -5.35 | -5.11 | -4.75 |
| 1540.54 | -6.76 | -6.85 | -6.89 | -6.77 | -6.78 | -6.52 | -6.44 | -6.22 | -5.92 | -5.48 | -5.25 |
| 1660.48 | -6.50 | -6.54 | -6.60 | -6.51 | -6.41 | -6.27 | -6.16 | -5.77 | -5.49 | -5.22 | -4.92 |
| 1789.83 | -6.77 | -6.70 | -6.90 | -6.91 | -6.65 | -6.48 | -6.28 | -6.15 | -5.83 | -5.44 | -5.20 |
| 1929.34 | -6.65 | -6.77 | -6.89 | -6.72 | -6.58 | -6.52 | -6.24 | -6.00 | -5.76 | -5.38 | -4.99 |
| 2079.8  | -6.82 | -6.89 | -6.90 | -6.97 | -6.68 | -6.71 | -6.55 | -6.20 | -5.87 | -5.56 | -5.50 |
| 2242.08 | -6.67 | -6.72 | -6.80 | -6.72 | -6.71 | -6.49 | -6.33 | -6.02 | -5.84 | -5.38 | -5.07 |
| 2417.1  | -6.76 | -6.73 | -6.71 | -6.67 | -6.62 | -6.39 | -6.39 | -6.07 | -5.71 | -5.34 | -5.13 |
| 2605.85 | -6.89 | -7.00 | -7.01 | -6.91 | -6.76 | -6.54 | -6.46 | -6.08 | -5.78 | -5.72 | -5.14 |
| 2809.43 | -6.64 | -6.76 | -6.87 | -6.72 | -6.56 | -6.45 | -6.41 | -5.98 | -5.76 | -5.42 | -5.21 |

|         |       |       |       |       |       |       |       |       |       |       |       |
|---------|-------|-------|-------|-------|-------|-------|-------|-------|-------|-------|-------|
| 3028.99 | -6.48 | -6.41 | -6.62 | -6.45 | -6.35 | -6.41 | -6.15 | -5.99 | -5.58 | -5.34 | -4.99 |
| 3265.79 | -6.77 | -6.75 | -6.73 | -6.52 | -6.58 | -6.40 | -6.30 | -6.07 | -5.76 | -5.34 | -5.15 |
| 3521.18 | -6.80 | -7.06 | -7.20 | -6.96 | -6.80 | -6.75 | -6.65 | -6.42 | -6.19 | -5.67 | -5.39 |
| 3796.62 | -6.67 | -6.90 | -6.83 | -6.70 | -6.78 | -6.52 | -6.35 | -6.12 | -5.79 | -5.36 | -5.17 |

| Wavelength<br>(nm)<br>Time<br>(ps) | 506.63 | 508.04 | 509.45 | 510.86 | 512.27 | 513.67 | 515.08 | 516.49 | 517.90 | 519.31 | 520.72 |
|------------------------------------|--------|--------|--------|--------|--------|--------|--------|--------|--------|--------|--------|
|                                    | -3.28  | 0.16   | 0.32   | 0.33   | 0.18   | 0.22   | 0.23   | 0.25   | 0.13   | 0.19   | 0.22   |
| -2.78                              | 0.11   | -0.06  | 0.14   | 0.09   | 0.10   | 0.06   | 0.02   | 0.06   | 0.02   | 0.02   | -0.01  |
| -2.28                              | 0.12   | 0.14   | 0.10   | 0.16   | 0.20   | 0.15   | 0.17   | 0.20   | 0.21   | 0.08   | 0.21   |
| -1.78                              | 0.02   | -0.06  | -0.10  | -0.02  | -0.01  | -0.02  | 0.06   | 0.03   | 0.07   | 0.10   | 0.02   |
| -1.28                              | -0.35  | -0.29  | -0.21  | -0.20  | -0.32  | -0.33  | -0.35  | -0.30  | -0.35  | -0.24  | -0.34  |
| -0.78                              | 0.05   | 0.03   | 0.03   | -0.06  | 0.05   | 0.10   | 0.07   | 0.05   | 0.01   | 0.08   | 0.03   |
| -0.28                              | -0.31  | -0.32  | -0.54  | -0.32  | -0.51  | -0.39  | -0.47  | -0.48  | -0.41  | -0.47  | -0.47  |
| 0.22                               | 0.20   | 0.24   | 0.26   | 0.18   | 0.27   | 0.22   | 0.25   | 0.31   | 0.26   | 0.22   | 0.35   |
| 0.32                               | 0.13   | 0.12   | 0.15   | 0.08   | 0.17   | 0.07   | 0.10   | 0.22   | 0.12   | 0.24   | 0.20   |
| 0.42                               | -0.22  | -0.08  | -0.18  | -0.11  | -0.16  | -0.12  | -0.22  | -0.08  | -0.16  | -0.03  | 0.01   |
| 0.52                               | -0.40  | -0.23  | -0.33  | -0.33  | -0.41  | -0.30  | -0.31  | -0.18  | -0.42  | -0.33  | -0.24  |
| 0.62                               | 0.23   | 0.21   | 0.26   | 0.19   | 0.32   | 0.17   | 0.19   | 0.22   | 0.20   | 0.13   | 0.24   |
| 0.72                               | -0.34  | -0.47  | -0.37  | -0.45  | -0.38  | -0.41  | -0.38  | -0.35  | -0.39  | -0.31  | -0.23  |
| 0.77                               | 0.15   | 0.16   | 0.16   | 0.18   | 0.25   | 0.16   | 0.22   | 0.08   | 0.19   | 0.14   | 0.19   |
| 0.82                               | 0.31   | 0.30   | 0.22   | 0.06   | 0.35   | 0.30   | 0.21   | 0.24   | 0.21   | 0.26   | 0.22   |
| 0.87                               | -0.04  | 0.01   | -0.11  | -0.02  | 0.11   | 0.02   | 0.00   | -0.08  | 0.04   | -0.07  | 0.04   |
| 0.92                               | -0.14  | 0.00   | -0.10  | -0.15  | -0.18  | -0.11  | -0.18  | -0.09  | -0.05  | -0.12  | -0.10  |
| 0.97                               | -0.06  | -0.02  | -0.12  | -0.16  | 0.02   | -0.07  | -0.04  | -0.02  | 0.02   | -0.11  | -0.11  |
| 1.02                               | 0.02   | 0.00   | 0.06   | 0.02   | 0.12   | 0.08   | 0.13   | 0.05   | 0.04   | 0.05   | 0.11   |
| 1.07                               | -0.04  | -0.04  | 0.09   | 0.06   | 0.07   | -0.08  | 0.02   | 0.05   | 0.00   | -0.12  | -0.05  |
| 1.12                               | -0.18  | -0.20  | -0.22  | -0.24  | -0.26  | -0.30  | -0.29  | -0.24  | -0.18  | -0.21  | -0.13  |
| 1.17                               | -0.25  | -0.22  | -0.24  | -0.25  | -0.26  | -0.23  | -0.28  | -0.18  | -0.22  | -0.17  | -0.14  |
| 1.22                               | 0.12   | 0.07   | 0.13   | 0.14   | 0.27   | 0.14   | 0.10   | 0.20   | 0.31   | 0.17   | 0.22   |
| 1.27                               | -0.06  | -0.09  | -0.01  | -0.09  | -0.04  | -0.07  | -0.08  | -0.02  | -0.09  | -0.10  | -0.02  |
| 1.32                               | -0.39  | -0.27  | -0.31  | -0.35  | -0.28  | -0.22  | -0.25  | -0.25  | -0.07  | -0.19  | -0.05  |
| 1.37                               | -0.42  | -0.33  | -0.42  | -0.41  | -0.26  | -0.40  | -0.31  | -0.33  | -0.34  | -0.34  | -0.23  |
| 1.42                               | 0.33   | 0.36   | 0.30   | 0.22   | 0.19   | 0.04   | -0.07  | 0.03   | -0.13  | -0.23  | -0.34  |
| 1.47                               | -6.41  | -5.97  | -5.55  | -5.10  | -4.63  | -4.26  | -3.95  | -3.66  | -3.46  | -3.06  | -2.82  |
| 1.52                               | -12.15 | -11.82 | -11.47 | -11.13 | -10.97 | -10.70 | -10.35 | -10.19 | -9.87  | -9.62  | -9.24  |
| 1.57                               | -14.94 | -14.85 | -14.75 | -14.69 | -14.57 | -14.55 | -14.56 | -14.45 | -14.43 | -14.24 | -14.16 |
| 1.62                               | -15.54 | -15.45 | -15.52 | -15.53 | -15.50 | -15.60 | -15.80 | -15.77 | -15.97 | -15.93 | -15.96 |
| 1.67                               | -14.78 | -14.80 | -14.91 | -14.90 | -14.90 | -15.02 | -15.26 | -15.39 | -15.57 | -15.67 | -15.82 |
| 1.72                               | -13.15 | -13.12 | -13.09 | -13.11 | -13.08 | -13.22 | -13.41 | -13.43 | -13.63 | -13.88 | -13.94 |
| 1.77                               | -12.19 | -12.25 | -12.30 | -12.16 | -12.25 | -12.28 | -12.41 | -12.49 | -12.65 | -12.76 | -12.90 |
| 1.82                               | -11.71 | -11.80 | -11.82 | -11.75 | -11.69 | -11.79 | -11.74 | -12.03 | -12.12 | -12.25 | -12.37 |
| 1.87                               | -11.29 | -11.25 | -11.24 | -11.14 | -11.13 | -11.10 | -11.09 | -11.16 | -11.23 | -11.45 | -11.51 |
| 1.92                               | -10.88 | -10.72 | -10.67 | -10.57 | -10.35 | -10.46 | -10.41 | -10.61 | -10.72 | -10.77 | -10.87 |
| 1.97                               | -10.73 | -10.50 | -10.47 | -10.42 | -10.34 | -10.39 | -10.32 | -10.36 | -10.46 | -10.47 | -10.52 |
| 2.02                               | -9.98  | -9.88  | -9.88  | -9.68  | -9.52  | -9.52  | -9.51  | -9.61  | -9.57  | -9.56  | -9.67  |
| 2.07                               | -9.96  | -9.89  | -9.75  | -9.72  | -9.51  | -9.45  | -9.41  | -9.47  | -9.41  | -9.46  | -9.55  |
| 2.12                               | -9.78  | -9.50  | -9.42  | -9.35  | -9.21  | -9.11  | -9.17  | -9.17  | -9.14  | -9.29  | -9.22  |

|      |       |       |       |       |       |       |       |       |       |       |       |
|------|-------|-------|-------|-------|-------|-------|-------|-------|-------|-------|-------|
| 2.17 | -9.36 | -9.10 | -9.00 | -8.77 | -8.80 | -8.82 | -8.70 | -8.70 | -8.76 | -8.77 | -8.67 |
| 2.22 | -9.00 | -8.83 | -8.69 | -8.62 | -8.43 | -8.45 | -8.33 | -8.28 | -8.27 | -8.28 | -8.35 |
| 2.27 | -8.69 | -8.49 | -8.23 | -8.21 | -8.02 | -7.99 | -7.86 | -7.84 | -7.95 | -7.93 | -7.84 |
| 2.32 | -8.80 | -8.66 | -8.52 | -8.34 | -8.13 | -8.26 | -8.12 | -7.97 | -8.08 | -8.17 | -8.00 |
| 2.37 | -8.71 | -8.52 | -8.28 | -8.22 | -8.02 | -8.01 | -7.86 | -8.00 | -7.78 | -7.83 | -7.78 |
| 2.42 | -8.72 | -8.32 | -8.18 | -8.08 | -7.78 | -7.76 | -7.84 | -7.70 | -7.55 | -7.46 | -7.48 |
| 2.47 | -8.54 | -8.29 | -8.07 | -7.95 | -7.66 | -7.65 | -7.62 | -7.52 | -7.54 | -7.41 | -7.45 |
| 2.52 | -8.29 | -8.13 | -7.99 | -7.82 | -7.70 | -7.46 | -7.45 | -7.48 | -7.32 | -7.43 | -7.40 |
| 2.57 | -8.29 | -7.90 | -7.74 | -7.68 | -7.44 | -7.43 | -7.27 | -7.36 | -7.17 | -7.21 | -7.16 |
| 2.62 | -8.50 | -8.34 | -8.14 | -7.77 | -7.65 | -7.67 | -7.32 | -7.49 | -7.38 | -7.39 | -7.30 |
| 2.67 | -8.30 | -7.99 | -7.78 | -7.47 | -7.35 | -7.21 | -7.17 | -7.10 | -7.05 | -6.95 | -6.99 |
| 2.72 | -8.12 | -7.76 | -7.63 | -7.55 | -7.31 | -7.00 | -7.04 | -6.99 | -6.90 | -6.87 | -6.75 |
| 2.77 | -8.61 | -8.44 | -8.12 | -7.86 | -7.70 | -7.64 | -7.49 | -7.37 | -7.39 | -7.30 | -7.24 |
| 2.82 | -7.79 | -7.44 | -7.34 | -7.12 | -6.95 | -6.68 | -6.63 | -6.74 | -6.48 | -6.46 | -6.36 |
| 2.87 | -7.88 | -7.68 | -7.48 | -7.26 | -7.21 | -7.00 | -6.85 | -6.80 | -6.86 | -6.73 | -6.69 |
| 2.92 | -7.74 | -7.36 | -7.40 | -7.14 | -6.83 | -6.65 | -6.56 | -6.57 | -6.46 | -6.61 | -6.29 |
| 2.97 | -8.46 | -8.16 | -7.98 | -7.75 | -7.41 | -7.33 | -7.08 | -7.08 | -7.00 | -6.96 | -6.91 |
| 3.02 | -8.14 | -7.76 | -7.61 | -7.39 | -7.17 | -7.01 | -6.89 | -6.82 | -6.67 | -6.59 | -6.45 |
| 3.07 | -7.69 | -7.36 | -7.30 | -7.08 | -6.81 | -6.70 | -6.39 | -6.46 | -6.31 | -6.24 | -6.24 |
| 3.12 | -7.78 | -7.53 | -7.26 | -6.96 | -6.72 | -6.57 | -6.56 | -6.37 | -6.37 | -6.40 | -6.21 |
| 3.17 | -7.81 | -7.44 | -7.36 | -7.02 | -6.74 | -6.67 | -6.56 | -6.52 | -6.25 | -6.31 | -6.28 |
| 3.22 | -7.72 | -7.54 | -7.37 | -6.92 | -6.74 | -6.63 | -6.53 | -6.43 | -6.29 | -6.33 | -6.24 |
| 3.27 | -7.54 | -7.22 | -6.99 | -6.81 | -6.45 | -6.36 | -6.38 | -6.28 | -6.14 | -6.07 | -5.93 |
| 3.32 | -7.36 | -7.11 | -6.87 | -6.66 | -6.36 | -6.25 | -6.05 | -5.98 | -5.91 | -5.85 | -5.84 |
| 3.37 | -7.58 | -7.19 | -7.03 | -6.76 | -6.59 | -6.37 | -6.36 | -6.23 | -6.03 | -6.06 | -5.93 |
| 3.42 | -7.48 | -7.14 | -6.93 | -6.75 | -6.60 | -6.36 | -6.22 | -6.09 | -5.98 | -6.01 | -5.90 |
| 3.47 | -7.23 | -7.06 | -6.84 | -6.52 | -6.24 | -6.15 | -6.03 | -5.95 | -5.82 | -5.89 | -5.65 |
| 3.52 | -7.83 | -7.42 | -7.17 | -6.95 | -6.70 | -6.55 | -6.36 | -6.41 | -6.30 | -6.29 | -6.09 |
| 3.57 | -7.36 | -7.34 | -7.12 | -6.73 | -6.52 | -6.26 | -6.18 | -6.09 | -6.00 | -5.88 | -5.74 |
| 3.62 | -7.51 | -7.25 | -6.99 | -6.80 | -6.53 | -6.29 | -6.11 | -6.06 | -5.97 | -5.92 | -5.92 |
| 3.67 | -7.56 | -7.28 | -6.83 | -6.74 | -6.59 | -6.42 | -6.17 | -6.10 | -5.91 | -5.90 | -5.83 |
| 3.72 | -7.17 | -6.81 | -6.49 | -6.39 | -6.09 | -5.88 | -5.75 | -5.67 | -5.54 | -5.46 | -5.39 |
| 3.92 | -7.19 | -6.74 | -6.50 | -6.28 | -6.07 | -5.88 | -5.79 | -5.66 | -5.61 | -5.48 | -5.38 |
| 4.12 | -7.28 | -6.84 | -6.62 | -6.28 | -6.07 | -5.83 | -5.74 | -5.62 | -5.47 | -5.50 | -5.40 |
| 4.32 | -7.34 | -6.99 | -6.76 | -6.63 | -6.21 | -6.03 | -5.90 | -5.73 | -5.69 | -5.54 | -5.46 |
| 4.52 | -6.93 | -6.43 | -6.32 | -6.03 | -5.76 | -5.61 | -5.54 | -5.30 | -5.21 | -5.16 | -5.19 |
| 4.72 | -6.77 | -6.46 | -6.38 | -5.96 | -5.83 | -5.67 | -5.42 | -5.44 | -5.25 | -5.23 | -5.14 |
| 4.92 | -7.07 | -6.72 | -6.40 | -6.13 | -5.91 | -5.69 | -5.53 | -5.41 | -5.36 | -5.36 | -5.24 |
| 5.12 | -7.12 | -6.92 | -6.54 | -6.30 | -6.06 | -5.91 | -5.78 | -5.58 | -5.46 | -5.55 | -5.40 |
| 5.32 | -7.16 | -6.77 | -6.46 | -6.19 | -5.98 | -5.81 | -5.51 | -5.38 | -5.30 | -5.40 | -5.14 |
| 5.52 | -6.84 | -6.45 | -6.29 | -6.03 | -5.78 | -5.49 | -5.41 | -5.24 | -5.11 | -5.09 | -4.99 |
| 5.72 | -7.29 | -6.92 | -6.73 | -6.32 | -6.08 | -5.95 | -5.86 | -5.63 | -5.56 | -5.55 | -5.39 |
| 5.92 | -6.59 | -6.27 | -6.12 | -5.83 | -5.61 | -5.31 | -5.21 | -5.15 | -5.01 | -4.97 | -4.86 |
| 6.12 | -6.98 | -6.64 | -6.37 | -5.96 | -5.60 | -5.47 | -5.41 | -5.32 | -5.12 | -5.09 | -4.97 |
| 6.32 | -6.96 | -6.68 | -6.24 | -5.86 | -5.74 | -5.64 | -5.42 | -5.24 | -5.17 | -5.04 | -5.04 |
| 6.52 | -6.72 | -6.27 | -6.05 | -5.81 | -5.45 | -5.23 | -5.10 | -5.04 | -4.94 | -4.89 | -4.79 |
| 6.72 | -6.91 | -6.54 | -6.16 | -6.07 | -5.77 | -5.47 | -5.35 | -5.36 | -5.10 | -5.14 | -5.07 |
| 6.92 | -6.61 | -6.21 | -5.92 | -5.78 | -5.43 | -5.22 | -5.10 | -5.00 | -4.89 | -4.89 | -4.67 |
| 7.12 | -6.05 | -5.79 | -5.40 | -5.20 | -4.88 | -4.75 | -4.49 | -4.49 | -4.35 | -4.34 | -4.29 |
| 7.32 | -6.54 | -6.18 | -5.87 | -5.51 | -5.44 | -5.22 | -5.11 | -4.90 | -4.79 | -4.77 | -4.74 |

|       |       |       |       |       |       |       |       |       |       |       |       |
|-------|-------|-------|-------|-------|-------|-------|-------|-------|-------|-------|-------|
| 7.52  | -6.59 | -6.22 | -5.78 | -5.54 | -5.25 | -5.16 | -4.86 | -4.83 | -4.59 | -4.62 | -4.50 |
| 7.72  | -6.95 | -6.52 | -6.26 | -5.88 | -5.62 | -5.41 | -5.34 | -5.24 | -5.15 | -5.11 | -4.94 |
| 7.92  | -6.48 | -6.08 | -5.82 | -5.53 | -5.27 | -5.23 | -5.01 | -4.84 | -4.83 | -4.72 | -4.62 |
| 8.12  | -6.31 | -5.84 | -5.77 | -5.35 | -5.19 | -5.10 | -4.81 | -4.76 | -4.62 | -4.63 | -4.50 |
| 8.32  | -6.37 | -5.98 | -5.66 | -5.32 | -5.15 | -4.95 | -4.81 | -4.79 | -4.68 | -4.55 | -4.55 |
| 8.52  | -6.50 | -6.13 | -5.93 | -5.64 | -5.40 | -5.06 | -4.98 | -4.76 | -4.74 | -4.80 | -4.61 |
| 8.72  | -6.44 | -6.15 | -5.88 | -5.53 | -5.25 | -5.12 | -4.85 | -4.70 | -4.74 | -4.61 | -4.61 |
| 8.92  | -6.73 | -6.47 | -6.11 | -5.85 | -5.55 | -5.35 | -5.10 | -5.10 | -4.96 | -4.96 | -4.86 |
| 9.12  | -6.54 | -6.17 | -5.96 | -5.60 | -5.38 | -5.20 | -5.08 | -4.86 | -4.75 | -4.78 | -4.79 |
| 9.32  | -6.86 | -6.47 | -6.08 | -5.91 | -5.64 | -5.61 | -5.42 | -5.32 | -5.08 | -5.12 | -4.94 |
| 9.52  | -6.50 | -6.17 | -5.80 | -5.43 | -5.33 | -5.13 | -4.93 | -4.82 | -4.69 | -4.69 | -4.62 |
| 9.72  | -6.65 | -6.22 | -5.88 | -5.60 | -5.37 | -5.17 | -4.98 | -4.90 | -4.74 | -4.73 | -4.51 |
| 9.92  | -6.73 | -6.38 | -6.14 | -5.75 | -5.46 | -5.29 | -5.18 | -5.04 | -4.96 | -5.00 | -4.80 |
| 10.12 | -6.21 | -5.76 | -5.56 | -5.28 | -4.97 | -4.94 | -4.77 | -4.58 | -4.52 | -4.51 | -4.35 |
| 10.32 | -6.31 | -6.02 | -5.69 | -5.32 | -5.07 | -4.98 | -4.69 | -4.73 | -4.56 | -4.50 | -4.58 |
| 10.52 | -6.33 | -6.01 | -5.70 | -5.46 | -5.12 | -4.95 | -4.81 | -4.87 | -4.73 | -4.58 | -4.60 |
| 10.72 | -6.31 | -5.96 | -5.66 | -5.43 | -5.18 | -4.87 | -4.78 | -4.72 | -4.61 | -4.53 | -4.56 |
| 10.92 | -6.28 | -6.14 | -5.84 | -5.52 | -5.26 | -4.96 | -4.92 | -4.80 | -4.70 | -4.63 | -4.51 |
| 11.12 | -6.63 | -6.22 | -5.82 | -5.62 | -5.39 | -5.26 | -5.04 | -4.92 | -4.92 | -4.80 | -4.73 |
| 11.32 | -6.30 | -5.95 | -5.64 | -5.34 | -5.09 | -4.97 | -4.82 | -4.70 | -4.63 | -4.58 | -4.49 |
| 11.52 | -5.85 | -5.51 | -5.21 | -4.94 | -4.79 | -4.61 | -4.49 | -4.21 | -4.23 | -4.23 | -4.10 |
| 11.72 | -6.20 | -5.94 | -5.62 | -5.21 | -5.05 | -4.73 | -4.61 | -4.51 | -4.58 | -4.43 | -4.41 |
| 11.92 | -5.87 | -5.45 | -5.13 | -4.88 | -4.63 | -4.47 | -4.30 | -4.18 | -4.08 | -4.03 | -3.89 |
| 12.12 | -5.62 | -5.23 | -4.80 | -4.69 | -4.45 | -4.21 | -4.13 | -3.98 | -3.89 | -3.86 | -3.85 |
| 12.32 | -6.35 | -5.87 | -5.46 | -5.26 | -4.93 | -4.80 | -4.60 | -4.45 | -4.48 | -4.49 | -4.29 |
| 12.52 | -6.04 | -5.64 | -5.32 | -5.09 | -4.85 | -4.74 | -4.55 | -4.37 | -4.14 | -4.28 | -4.14 |
| 12.72 | -6.51 | -6.12 | -5.99 | -5.60 | -5.30 | -5.19 | -4.91 | -4.96 | -4.90 | -4.90 | -4.70 |
| 12.92 | -6.24 | -5.88 | -5.68 | -5.27 | -5.12 | -4.82 | -4.62 | -4.60 | -4.45 | -4.45 | -4.37 |
| 13.12 | -6.09 | -5.65 | -5.19 | -5.09 | -4.63 | -4.57 | -4.42 | -4.29 | -4.23 | -4.24 | -4.12 |
| 13.32 | -6.72 | -6.26 | -5.98 | -5.72 | -5.46 | -5.23 | -5.11 | -4.98 | -5.03 | -4.96 | -4.83 |
| 13.52 | -6.11 | -5.88 | -5.48 | -5.22 | -5.02 | -4.75 | -4.63 | -4.68 | -4.47 | -4.47 | -4.41 |
| 13.72 | -6.02 | -5.64 | -5.43 | -5.14 | -4.81 | -4.84 | -4.51 | -4.44 | -4.37 | -4.32 | -4.18 |
| 13.92 | -6.33 | -5.91 | -5.76 | -5.33 | -5.23 | -4.94 | -4.88 | -4.73 | -4.54 | -4.55 | -4.51 |
| 14    | -6.18 | -5.80 | -5.49 | -5.19 | -4.98 | -4.76 | -4.59 | -4.49 | -4.49 | -4.43 | -4.28 |
| 14.08 | -6.36 | -5.89 | -5.63 | -5.40 | -5.05 | -4.98 | -4.69 | -4.63 | -4.59 | -4.42 | -4.42 |
| 14.17 | -5.89 | -5.54 | -5.24 | -5.03 | -4.73 | -4.57 | -4.46 | -4.15 | -4.15 | -4.19 | -3.96 |
| 14.27 | -6.19 | -5.81 | -5.58 | -5.10 | -4.99 | -4.72 | -4.73 | -4.65 | -4.55 | -4.51 | -4.37 |
| 14.38 | -6.20 | -5.74 | -5.52 | -5.29 | -5.01 | -4.84 | -4.76 | -4.50 | -4.38 | -4.44 | -4.35 |
| 14.49 | -6.12 | -5.80 | -5.60 | -5.21 | -4.99 | -4.78 | -4.71 | -4.66 | -4.39 | -4.38 | -4.30 |
| 14.61 | -6.37 | -6.03 | -5.73 | -5.46 | -5.09 | -5.00 | -4.77 | -4.64 | -4.66 | -4.62 | -4.57 |
| 14.75 | -6.19 | -5.97 | -5.58 | -5.27 | -5.00 | -4.85 | -4.56 | -4.61 | -4.50 | -4.38 | -4.37 |
| 14.89 | -6.16 | -5.81 | -5.51 | -5.25 | -5.02 | -4.79 | -4.76 | -4.52 | -4.44 | -4.35 | -4.37 |
| 15.05 | -6.12 | -5.74 | -5.46 | -5.15 | -4.96 | -4.70 | -4.58 | -4.39 | -4.41 | -4.45 | -4.38 |
| 15.21 | -6.24 | -5.79 | -5.59 | -5.24 | -4.96 | -4.79 | -4.64 | -4.41 | -4.51 | -4.47 | -4.24 |
| 15.39 | -6.08 | -5.80 | -5.46 | -5.30 | -4.95 | -4.74 | -4.61 | -4.43 | -4.40 | -4.32 | -4.31 |
| 15.59 | -6.30 | -5.92 | -5.64 | -5.30 | -4.96 | -4.92 | -4.75 | -4.64 | -4.59 | -4.58 | -4.43 |
| 15.8  | -5.91 | -5.67 | -5.37 | -5.21 | -4.81 | -4.71 | -4.55 | -4.53 | -4.31 | -4.48 | -4.32 |
| 16.02 | -5.87 | -5.48 | -5.29 | -5.01 | -4.66 | -4.48 | -4.39 | -4.33 | -4.24 | -4.15 | -4.15 |
| 16.27 | -6.05 | -5.62 | -5.34 | -5.08 | -4.74 | -4.73 | -4.42 | -4.42 | -4.35 | -4.38 | -4.15 |
| 16.53 | -5.94 | -5.52 | -5.36 | -5.00 | -4.75 | -4.52 | -4.40 | -4.37 | -4.15 | -4.18 | -4.04 |

|        |       |       |       |       |       |       |       |       |       |       |       |
|--------|-------|-------|-------|-------|-------|-------|-------|-------|-------|-------|-------|
| 16.81  | -6.20 | -5.85 | -5.61 | -5.11 | -5.09 | -4.77 | -4.61 | -4.49 | -4.44 | -4.34 | -4.34 |
| 17.12  | -6.18 | -5.81 | -5.38 | -5.04 | -4.82 | -4.63 | -4.54 | -4.41 | -4.39 | -4.26 | -4.21 |
| 17.45  | -6.10 | -5.75 | -5.44 | -5.26 | -5.01 | -4.73 | -4.71 | -4.52 | -4.39 | -4.30 | -4.23 |
| 17.81  | -5.91 | -5.58 | -5.17 | -4.96 | -4.70 | -4.52 | -4.39 | -4.23 | -4.21 | -4.27 | -4.13 |
| 18.19  | -6.00 | -5.69 | -5.46 | -5.10 | -4.71 | -4.69 | -4.44 | -4.39 | -4.29 | -4.30 | -4.25 |
| 18.6   | -6.02 | -5.42 | -5.31 | -5.11 | -4.78 | -4.52 | -4.30 | -4.33 | -4.20 | -4.18 | -4.11 |
| 19.05  | -6.43 | -6.04 | -5.73 | -5.47 | -5.13 | -4.97 | -4.76 | -4.70 | -4.59 | -4.62 | -4.59 |
| 19.53  | -5.93 | -5.52 | -5.25 | -4.90 | -4.80 | -4.42 | -4.37 | -4.32 | -4.20 | -4.25 | -4.07 |
| 20.05  | -5.96 | -5.66 | -5.23 | -4.98 | -4.78 | -4.53 | -4.52 | -4.37 | -4.27 | -4.29 | -4.18 |
| 20.61  | -6.05 | -5.72 | -5.38 | -5.06 | -4.77 | -4.70 | -4.54 | -4.34 | -4.35 | -4.33 | -4.28 |
| 21.22  | -6.18 | -5.84 | -5.50 | -5.15 | -4.95 | -4.78 | -4.62 | -4.44 | -4.46 | -4.44 | -4.29 |
| 21.87  | -5.91 | -5.55 | -5.24 | -4.93 | -4.53 | -4.50 | -4.30 | -4.21 | -4.12 | -3.98 | -4.07 |
| 22.57  | -6.21 | -5.81 | -5.47 | -5.20 | -4.86 | -4.85 | -4.51 | -4.42 | -4.44 | -4.35 | -4.24 |
| 23.33  | -5.86 | -5.30 | -5.04 | -4.78 | -4.61 | -4.42 | -4.15 | -4.08 | -4.04 | -4.06 | -3.97 |
| 24.15  | -5.85 | -5.37 | -5.09 | -4.76 | -4.56 | -4.27 | -4.22 | -4.08 | -3.97 | -3.96 | -3.93 |
| 25.03  | -5.78 | -5.36 | -5.16 | -4.99 | -4.65 | -4.39 | -4.26 | -4.10 | -4.25 | -4.05 | -3.95 |
| 25.98  | -6.35 | -5.94 | -5.75 | -5.37 | -5.15 | -4.91 | -4.77 | -4.77 | -4.67 | -4.56 | -4.50 |
| 27.01  | -6.24 | -5.97 | -5.71 | -5.41 | -5.05 | -4.87 | -4.65 | -4.61 | -4.62 | -4.60 | -4.54 |
| 28.11  | -5.84 | -5.45 | -5.26 | -4.90 | -4.55 | -4.45 | -4.30 | -4.20 | -4.09 | -4.13 | -4.04 |
| 29.3   | -6.28 | -5.92 | -5.63 | -5.34 | -4.97 | -4.82 | -4.76 | -4.51 | -4.65 | -4.52 | -4.37 |
| 30.59  | -5.71 | -5.29 | -5.04 | -4.62 | -4.37 | -4.25 | -4.08 | -4.13 | -4.07 | -4.06 | -4.12 |
| 31.98  | -5.89 | -5.52 | -5.34 | -4.97 | -4.70 | -4.56 | -4.47 | -4.28 | -4.15 | -4.15 | -4.14 |
| 33.47  | -5.71 | -5.55 | -5.21 | -4.85 | -4.64 | -4.41 | -4.22 | -4.01 | -3.90 | -3.91 | -3.90 |
| 35.09  | -5.84 | -5.47 | -5.18 | -4.95 | -4.55 | -4.39 | -4.23 | -4.16 | -4.08 | -3.99 | -3.94 |
| 36.83  | -5.85 | -5.46 | -5.15 | -4.92 | -4.67 | -4.44 | -4.37 | -4.17 | -4.06 | -4.09 | -3.96 |
| 38.71  | -5.97 | -5.47 | -5.20 | -4.95 | -4.71 | -4.51 | -4.33 | -4.17 | -4.07 | -4.12 | -3.96 |
| 40.73  | -5.94 | -5.54 | -5.30 | -5.19 | -4.71 | -4.49 | -4.35 | -4.31 | -4.23 | -4.22 | -4.13 |
| 42.92  | -5.94 | -5.48 | -5.26 | -5.01 | -4.68 | -4.49 | -4.36 | -4.23 | -4.06 | -4.11 | -3.91 |
| 45.27  | -6.01 | -5.70 | -5.38 | -5.09 | -4.82 | -4.59 | -4.47 | -4.31 | -4.25 | -4.22 | -4.11 |
| 47.81  | -6.32 | -6.02 | -5.69 | -5.44 | -5.16 | -4.86 | -4.88 | -4.74 | -4.69 | -4.59 | -4.56 |
| 50.55  | -6.05 | -5.60 | -5.38 | -4.99 | -4.75 | -4.49 | -4.33 | -4.20 | -4.14 | -4.17 | -4.01 |
| 53.51  | -6.07 | -5.64 | -5.44 | -5.16 | -4.81 | -4.66 | -4.59 | -4.35 | -4.40 | -4.27 | -4.15 |
| 56.69  | -6.05 | -5.75 | -5.49 | -5.04 | -4.80 | -4.73 | -4.50 | -4.35 | -4.20 | -4.17 | -4.00 |
| 60.13  | -5.99 | -5.57 | -5.30 | -4.91 | -4.60 | -4.48 | -4.32 | -4.18 | -4.19 | -4.03 | -3.92 |
| 63.84  | -6.12 | -5.72 | -5.47 | -5.13 | -4.75 | -4.82 | -4.52 | -4.38 | -4.21 | -4.20 | -4.15 |
| 67.83  | -6.38 | -6.04 | -5.79 | -5.39 | -5.23 | -5.03 | -4.77 | -4.67 | -4.67 | -4.43 | -4.38 |
| 72.15  | -5.94 | -5.73 | -5.41 | -5.18 | -4.90 | -4.59 | -4.47 | -4.33 | -4.25 | -4.17 | -4.17 |
| 76.8   | -6.05 | -5.64 | -5.25 | -4.99 | -4.79 | -4.51 | -4.38 | -4.26 | -4.21 | -4.19 | -4.05 |
| 81.81  | -5.92 | -5.46 | -5.29 | -5.00 | -4.67 | -4.45 | -4.27 | -4.11 | -3.97 | -4.02 | -3.88 |
| 87.22  | -6.01 | -5.72 | -5.30 | -4.99 | -4.69 | -4.55 | -4.21 | -4.13 | -3.84 | -3.97 | -3.84 |
| 93.06  | -6.01 | -5.66 | -5.31 | -4.93 | -4.71 | -4.46 | -4.29 | -4.25 | -4.13 | -4.04 | -3.90 |
| 99.35  | -5.88 | -5.69 | -5.35 | -5.02 | -4.75 | -4.51 | -4.26 | -4.27 | -4.05 | -3.91 | -3.92 |
| 106.13 | -5.84 | -5.54 | -5.22 | -4.94 | -4.65 | -4.34 | -4.23 | -4.10 | -4.01 | -3.91 | -3.77 |
| 113.45 | -5.90 | -5.56 | -5.35 | -4.92 | -4.64 | -4.55 | -4.34 | -4.23 | -4.02 | -4.02 | -3.75 |
| 121.34 | -6.01 | -5.66 | -5.32 | -5.08 | -4.72 | -4.49 | -4.37 | -4.17 | -4.05 | -3.92 | -3.78 |
| 129.86 | -6.29 | -5.94 | -5.66 | -5.28 | -4.99 | -4.70 | -4.61 | -4.47 | -4.30 | -4.23 | -4.11 |
| 139.04 | -5.82 | -5.35 | -5.21 | -4.62 | -4.38 | -4.10 | -3.98 | -3.82 | -3.66 | -3.62 | -3.41 |
| 148.94 | -5.96 | -5.56 | -5.17 | -4.99 | -4.54 | -4.28 | -4.25 | -3.91 | -3.79 | -3.68 | -3.57 |
| 159.62 | -5.75 | -5.32 | -5.05 | -4.73 | -4.50 | -4.30 | -3.96 | -3.98 | -3.72 | -3.71 | -3.47 |
| 171.14 | -5.62 | -5.37 | -5.02 | -4.68 | -4.38 | -4.12 | -3.81 | -3.79 | -3.72 | -3.51 | -3.31 |

|         |       |       |       |       |       |       |       |       |       |       |       |
|---------|-------|-------|-------|-------|-------|-------|-------|-------|-------|-------|-------|
| 183.56  | -6.07 | -5.60 | -5.29 | -4.92 | -4.56 | -4.53 | -4.20 | -4.10 | -3.94 | -3.75 | -3.60 |
| 196.96  | -5.93 | -5.54 | -5.22 | -4.92 | -4.66 | -4.45 | -4.10 | -3.93 | -3.92 | -3.68 | -3.57 |
| 211.41  | -5.73 | -5.65 | -5.12 | -4.85 | -4.57 | -4.29 | -3.96 | -3.95 | -3.77 | -3.65 | -3.50 |
| 226.99  | -5.79 | -5.24 | -4.96 | -4.79 | -4.43 | -4.23 | -3.83 | -3.72 | -3.52 | -3.45 | -3.36 |
| 243.8   | -5.84 | -5.42 | -5.11 | -4.84 | -4.50 | -4.24 | -3.99 | -3.77 | -3.66 | -3.49 | -3.37 |
| 261.93  | -5.77 | -5.38 | -4.98 | -4.61 | -4.39 | -4.17 | -3.88 | -3.61 | -3.53 | -3.40 | -3.22 |
| 281.48  | -5.57 | -5.34 | -4.91 | -4.53 | -4.28 | -3.97 | -3.67 | -3.46 | -3.27 | -3.12 | -2.88 |
| 302.56  | -5.56 | -5.20 | -4.94 | -4.57 | -4.15 | -3.98 | -3.77 | -3.53 | -3.35 | -3.14 | -2.94 |
| 325.3   | -5.77 | -5.23 | -4.93 | -4.54 | -4.27 | -4.03 | -3.67 | -3.53 | -3.24 | -3.19 | -2.96 |
| 349.83  | -5.46 | -5.05 | -4.78 | -4.34 | -4.09 | -3.90 | -3.60 | -3.41 | -3.16 | -3.02 | -2.68 |
| 376.28  | -5.61 | -5.23 | -4.82 | -4.55 | -4.13 | -3.86 | -3.68 | -3.44 | -3.16 | -3.11 | -2.85 |
| 404.81  | -5.21 | -4.72 | -4.48 | -4.12 | -3.76 | -3.42 | -3.19 | -3.05 | -2.80 | -2.54 | -2.34 |
| 435.58  | -5.57 | -5.24 | -4.88 | -4.61 | -4.03 | -3.97 | -3.59 | -3.35 | -3.12 | -2.93 | -2.59 |
| 468.76  | -5.30 | -4.90 | -4.58 | -4.08 | -3.91 | -3.57 | -3.19 | -2.98 | -2.70 | -2.57 | -2.22 |
| 504.55  | -5.09 | -4.77 | -4.37 | -4.12 | -3.64 | -3.49 | -3.13 | -2.93 | -2.71 | -2.38 | -2.12 |
| 543.15  | -5.37 | -4.79 | -4.53 | -4.16 | -3.76 | -3.50 | -3.11 | -2.94 | -2.68 | -2.33 | -2.16 |
| 584.78  | -5.01 | -4.63 | -4.40 | -3.96 | -3.60 | -3.30 | -2.94 | -2.58 | -2.43 | -2.21 | -1.98 |
| 629.68  | -5.00 | -4.54 | -4.23 | -3.81 | -3.38 | -3.29 | -2.90 | -2.67 | -2.34 | -2.09 | -1.69 |
| 678.1   | -4.66 | -4.27 | -3.87 | -3.42 | -3.09 | -2.82 | -2.44 | -2.26 | -1.95 | -1.71 | -1.42 |
| 730.33  | -4.84 | -4.43 | -4.18 | -3.95 | -3.39 | -3.17 | -2.79 | -2.55 | -2.20 | -2.01 | -1.71 |
| 786.65  | -4.87 | -4.44 | -4.10 | -3.84 | -3.39 | -3.17 | -2.71 | -2.61 | -2.23 | -2.08 | -1.73 |
| 847.4   | -5.08 | -4.73 | -4.24 | -3.89 | -3.49 | -3.25 | -2.85 | -2.70 | -2.29 | -2.05 | -1.61 |
| 912.92  | -4.71 | -4.37 | -4.10 | -3.63 | -3.31 | -3.03 | -2.66 | -2.35 | -2.12 | -1.85 | -1.49 |
| 983.58  | -4.69 | -4.37 | -4.12 | -3.57 | -3.34 | -2.96 | -2.54 | -2.24 | -2.01 | -1.77 | -1.50 |
| 1059.78 | -4.76 | -4.32 | -3.98 | -3.62 | -3.26 | -2.91 | -2.59 | -2.25 | -2.04 | -1.64 | -1.42 |
| 1141.98 | -4.24 | -3.86 | -3.55 | -3.18 | -2.69 | -2.42 | -2.21 | -1.95 | -1.53 | -1.33 | -1.01 |
| 1230.62 | -4.65 | -4.16 | -3.80 | -3.47 | -3.12 | -2.81 | -2.48 | -2.17 | -1.93 | -1.62 | -1.27 |
| 1326.23 | -4.53 | -4.17 | -3.88 | -3.41 | -3.12 | -2.79 | -2.45 | -2.25 | -1.92 | -1.55 | -1.25 |
| 1429.34 | -4.34 | -4.01 | -3.67 | -3.26 | -2.87 | -2.50 | -2.22 | -1.99 | -1.58 | -1.27 | -0.92 |
| 1540.54 | -4.93 | -4.54 | -4.20 | -3.75 | -3.45 | -2.98 | -2.64 | -2.38 | -2.03 | -1.85 | -1.43 |
| 1660.48 | -4.63 | -4.17 | -3.82 | -3.50 | -3.12 | -2.73 | -2.36 | -2.11 | -1.75 | -1.50 | -1.17 |
| 1789.83 | -4.74 | -4.51 | -4.05 | -3.62 | -3.28 | -2.96 | -2.57 | -2.32 | -1.93 | -1.67 | -1.34 |
| 1929.34 | -4.60 | -4.36 | -4.00 | -3.57 | -3.17 | -2.80 | -2.45 | -2.14 | -1.80 | -1.64 | -1.23 |
| 2079.8  | -5.11 | -4.49 | -4.33 | -3.94 | -3.36 | -3.29 | -2.92 | -2.53 | -2.16 | -1.87 | -1.57 |
| 2242.08 | -4.81 | -4.25 | -3.94 | -3.71 | -3.10 | -2.92 | -2.61 | -2.19 | -1.90 | -1.58 | -1.19 |
| 2417.1  | -4.85 | -4.41 | -4.01 | -3.61 | -3.22 | -2.94 | -2.56 | -2.20 | -1.92 | -1.61 | -1.30 |
| 2605.85 | -4.86 | -4.40 | -4.13 | -3.73 | -3.33 | -2.95 | -2.50 | -2.40 | -1.98 | -1.79 | -1.38 |
| 2809.43 | -4.82 | -4.48 | -3.94 | -3.66 | -3.30 | -2.92 | -2.58 | -2.23 | -1.90 | -1.70 | -1.31 |
| 3028.99 | -4.70 | -4.33 | -4.00 | -3.54 | -3.18 | -2.88 | -2.57 | -2.30 | -1.92 | -1.48 | -1.27 |
| 3265.79 | -4.73 | -4.25 | -3.95 | -3.60 | -3.26 | -2.87 | -2.56 | -2.24 | -1.97 | -1.61 | -1.25 |
| 3521.18 | -5.05 | -4.64 | -4.32 | -3.91 | -3.61 | -3.23 | -2.95 | -2.75 | -2.29 | -2.10 | -1.69 |
| 3796.62 | -4.87 | -4.29 | -4.02 | -3.58 | -3.28 | -2.95 | -2.57 | -2.33 | -1.86 | -1.60 | -1.35 |

| Wavelength (nm) \ Time (ps) | 522.13 | 523.53 | 524.94 | 526.35 | 527.76 | 529.17 | 530.58 | 531.99 | 533.39 | 534.80 | 536.21 |
|-----------------------------|--------|--------|--------|--------|--------|--------|--------|--------|--------|--------|--------|
| -3.28                       | 0.19   | 0.22   | 0.12   | 0.25   | 0.22   | 0.09   | 0.13   | 0.19   | 0.18   | 0.24   | 0.15   |
| -2.78                       | 0.09   | 0.10   | 0.01   | 0.19   | 0.04   | 0.08   | 0.09   | 0.08   | 0.02   | 0.03   | 0.09   |
| -2.28                       | 0.17   | 0.19   | 0.28   | 0.14   | 0.29   | 0.28   | 0.19   | 0.28   | 0.26   | 0.24   | 0.15   |



|       |        |        |        |        |        |        |        |        |        |        |        |
|-------|--------|--------|--------|--------|--------|--------|--------|--------|--------|--------|--------|
| -1.78 | 0.03   | -0.09  | 0.05   | -0.03  | 0.06   | -0.03  | 0.08   | -0.17  | -0.01  | 0.00   | 0.03   |
| -1.28 | -0.36  | -0.25  | -0.29  | -0.31  | -0.24  | -0.19  | -0.27  | -0.32  | -0.20  | -0.29  | -0.23  |
| -0.78 | 0.02   | 0.07   | 0.13   | 0.05   | 0.04   | 0.08   | 0.06   | 0.09   | 0.01   | 0.02   | 0.05   |
| -0.28 | -0.46  | -0.51  | -0.48  | -0.57  | -0.63  | -0.50  | -0.51  | -0.46  | -0.56  | -0.58  | -0.58  |
| 0.22  | 0.31   | 0.26   | 0.18   | 0.30   | 0.23   | 0.19   | 0.24   | 0.31   | 0.30   | 0.34   | 0.34   |
| 0.32  | 0.08   | 0.11   | 0.17   | 0.19   | 0.19   | 0.07   | 0.12   | 0.17   | 0.17   | 0.14   | 0.28   |
| 0.42  | -0.08  | -0.17  | -0.20  | -0.11  | -0.11  | -0.10  | -0.04  | -0.12  | -0.21  | -0.22  | -0.10  |
| 0.52  | -0.28  | -0.22  | -0.25  | -0.21  | -0.31  | -0.22  | -0.28  | -0.30  | -0.35  | -0.26  | -0.24  |
| 0.62  | 0.15   | 0.14   | 0.29   | 0.24   | 0.21   | 0.18   | 0.15   | 0.10   | 0.13   | 0.17   | 0.11   |
| 0.72  | -0.46  | -0.46  | -0.32  | -0.30  | -0.42  | -0.36  | -0.33  | -0.41  | -0.45  | -0.34  | -0.31  |
| 0.77  | 0.22   | 0.14   | 0.06   | 0.17   | 0.17   | 0.11   | 0.28   | 0.12   | 0.18   | 0.13   | 0.14   |
| 0.82  | 0.28   | 0.23   | 0.16   | 0.15   | 0.16   | 0.14   | 0.30   | 0.26   | 0.21   | 0.17   | 0.18   |
| 0.87  | 0.05   | -0.01  | 0.01   | -0.06  | -0.11  | -0.13  | 0.01   | -0.11  | -0.11  | -0.01  | 0.02   |
| 0.92  | -0.13  | -0.19  | -0.10  | -0.19  | -0.12  | -0.07  | -0.10  | -0.06  | -0.30  | -0.11  | -0.04  |
| 0.97  | -0.04  | -0.06  | -0.04  | -0.01  | -0.09  | -0.04  | -0.14  | -0.08  | -0.17  | 0.01   | -0.02  |
| 1.02  | 0.00   | 0.19   | 0.16   | 0.15   | 0.12   | 0.17   | 0.15   | 0.11   | 0.12   | 0.19   | 0.17   |
| 1.07  | -0.04  | 0.10   | -0.01  | -0.10  | -0.04  | -0.07  | 0.10   | 0.07   | -0.04  | -0.07  | -0.05  |
| 1.12  | -0.28  | -0.21  | -0.28  | -0.17  | -0.26  | -0.24  | -0.19  | -0.17  | -0.23  | -0.33  | -0.23  |
| 1.17  | -0.19  | -0.23  | -0.26  | -0.17  | -0.22  | -0.20  | -0.18  | -0.16  | -0.19  | -0.21  | -0.15  |
| 1.22  | 0.30   | 0.20   | 0.16   | 0.29   | 0.09   | 0.13   | 0.25   | 0.29   | 0.17   | 0.21   | 0.26   |
| 1.27  | 0.04   | 0.00   | -0.03  | -0.03  | -0.02  | 0.02   | -0.03  | 0.11   | 0.04   | -0.01  | -0.04  |
| 1.32  | -0.13  | -0.18  | -0.12  | -0.22  | -0.27  | -0.17  | -0.18  | -0.15  | -0.21  | -0.23  | -0.19  |
| 1.37  | -0.39  | -0.19  | -0.28  | -0.24  | -0.20  | -0.22  | -0.11  | -0.07  | 0.01   | -0.03  | -0.05  |
| 1.42  | -0.43  | -0.47  | -0.46  | -0.58  | -0.49  | -0.70  | -0.54  | -0.43  | -0.51  | -0.47  | -0.41  |
| 1.47  | -2.45  | -2.14  | -1.80  | -1.51  | -1.24  | -1.03  | -0.60  | -0.58  | -0.24  | -0.01  | 0.23   |
| 1.52  | -8.89  | -8.57  | -8.01  | -7.62  | -7.13  | -6.58  | -5.99  | -5.51  | -4.87  | -4.32  | -3.46  |
| 1.57  | -14.00 | -13.79 | -13.49 | -13.07 | -12.61 | -12.28 | -11.60 | -11.04 | -10.30 | -9.50  | -8.58  |
| 1.62  | -16.06 | -15.91 | -15.87 | -15.62 | -15.50 | -15.21 | -14.60 | -14.15 | -13.65 | -12.82 | -11.97 |
| 1.67  | -15.95 | -16.03 | -16.13 | -16.04 | -15.99 | -15.84 | -15.45 | -15.17 | -14.55 | -14.07 | -13.29 |
| 1.72  | -14.14 | -14.27 | -14.42 | -14.38 | -14.30 | -14.20 | -13.92 | -13.57 | -13.17 | -12.72 | -11.97 |
| 1.77  | -13.07 | -13.21 | -13.13 | -13.20 | -13.10 | -13.06 | -12.79 | -12.54 | -12.12 | -11.68 | -10.97 |
| 1.82  | -12.58 | -12.64 | -12.72 | -12.77 | -12.64 | -12.52 | -12.31 | -11.95 | -11.60 | -11.20 | -10.70 |
| 1.87  | -11.64 | -11.71 | -11.81 | -11.78 | -11.79 | -11.54 | -11.33 | -11.03 | -10.76 | -10.33 | -9.68  |
| 1.92  | -10.89 | -10.96 | -11.10 | -10.81 | -10.84 | -10.72 | -10.45 | -10.16 | -9.81  | -9.25  | -8.62  |
| 1.97  | -10.68 | -10.61 | -10.65 | -10.60 | -10.57 | -10.39 | -10.03 | -9.54  | -9.34  | -8.70  | -8.13  |
| 2.02  | -9.66  | -9.73  | -9.63  | -9.60  | -9.43  | -9.26  | -9.00  | -8.58  | -8.11  | -7.59  | -6.88  |
| 2.07  | -9.69  | -9.63  | -9.61  | -9.49  | -9.33  | -9.03  | -8.59  | -8.25  | -7.82  | -7.18  | -6.53  |
| 2.12  | -9.28  | -9.28  | -9.19  | -9.15  | -8.91  | -8.87  | -8.43  | -8.09  | -7.58  | -6.96  | -6.35  |
| 2.17  | -8.70  | -8.80  | -8.75  | -8.70  | -8.54  | -8.28  | -7.91  | -7.62  | -7.21  | -6.53  | -5.91  |
| 2.22  | -8.37  | -8.52  | -8.36  | -8.21  | -8.03  | -7.83  | -7.50  | -7.10  | -6.75  | -6.15  | -5.44  |
| 2.27  | -7.86  | -7.79  | -7.86  | -7.76  | -7.54  | -7.30  | -6.90  | -6.44  | -6.05  | -5.44  | -4.78  |
| 2.32  | -8.02  | -7.98  | -7.98  | -7.68  | -7.59  | -7.30  | -6.78  | -6.38  | -5.93  | -5.23  | -4.57  |
| 2.37  | -7.76  | -7.73  | -7.83  | -7.61  | -7.35  | -7.10  | -6.63  | -6.32  | -5.72  | -5.15  | -4.32  |
| 2.42  | -7.54  | -7.59  | -7.39  | -7.31  | -7.16  | -6.92  | -6.46  | -6.06  | -5.49  | -4.85  | -4.05  |
| 2.47  | -7.45  | -7.35  | -7.32  | -7.13  | -7.11  | -6.83  | -6.24  | -5.89  | -5.25  | -4.71  | -4.08  |
| 2.52  | -7.42  | -7.32  | -7.22  | -7.12  | -6.84  | -6.70  | -6.19  | -5.66  | -5.21  | -4.60  | -3.92  |
| 2.57  | -7.11  | -7.14  | -7.11  | -6.83  | -6.74  | -6.34  | -5.92  | -5.53  | -4.99  | -4.21  | -3.55  |
| 2.62  | -7.31  | -7.31  | -7.14  | -7.03  | -6.86  | -6.50  | -6.02  | -5.62  | -5.03  | -4.28  | -3.54  |
| 2.67  | -6.88  | -6.85  | -6.80  | -6.60  | -6.42  | -6.11  | -5.66  | -5.20  | -4.72  | -4.02  | -3.35  |
| 2.72  | -6.81  | -6.78  | -6.67  | -6.42  | -6.34  | -6.09  | -5.70  | -5.18  | -4.62  | -4.00  | -3.17  |

|      |       |       |       |       |       |       |       |       |       |       |       |
|------|-------|-------|-------|-------|-------|-------|-------|-------|-------|-------|-------|
| 2.77 | -7.24 | -7.28 | -7.03 | -6.92 | -6.71 | -6.41 | -6.01 | -5.44 | -4.91 | -4.36 | -3.56 |
| 2.82 | -6.34 | -6.42 | -6.13 | -6.07 | -5.87 | -5.53 | -5.01 | -4.65 | -3.99 | -3.29 | -2.48 |
| 2.87 | -6.67 | -6.65 | -6.46 | -6.38 | -6.15 | -5.84 | -5.34 | -4.82 | -4.30 | -3.68 | -2.90 |
| 2.92 | -6.31 | -6.29 | -6.19 | -5.99 | -5.80 | -5.38 | -4.95 | -4.46 | -3.86 | -3.12 | -2.34 |
| 2.97 | -6.81 | -6.81 | -6.58 | -6.45 | -6.32 | -5.95 | -5.50 | -5.08 | -4.36 | -3.65 | -2.89 |
| 3.02 | -6.48 | -6.46 | -6.34 | -6.22 | -6.01 | -5.67 | -5.20 | -4.78 | -4.10 | -3.50 | -2.74 |
| 3.07 | -6.11 | -6.13 | -6.03 | -5.76 | -5.63 | -5.33 | -4.83 | -4.40 | -3.81 | -3.06 | -2.32 |
| 3.12 | -6.15 | -6.06 | -6.00 | -5.76 | -5.52 | -5.23 | -4.71 | -4.19 | -3.65 | -2.88 | -2.12 |
| 3.17 | -6.21 | -6.12 | -6.03 | -5.87 | -5.47 | -5.28 | -4.77 | -4.15 | -3.66 | -2.94 | -2.06 |
| 3.22 | -6.20 | -6.01 | -6.02 | -5.73 | -5.57 | -5.25 | -4.76 | -4.22 | -3.57 | -2.93 | -2.16 |
| 3.27 | -5.98 | -5.97 | -5.75 | -5.70 | -5.44 | -5.07 | -4.62 | -4.20 | -3.54 | -2.92 | -2.13 |
| 3.32 | -5.69 | -5.68 | -5.46 | -5.25 | -5.06 | -4.71 | -4.38 | -3.88 | -3.14 | -2.45 | -1.60 |
| 3.37 | -5.84 | -5.80 | -5.69 | -5.56 | -5.29 | -5.00 | -4.40 | -3.99 | -3.36 | -2.62 | -1.90 |
| 3.42 | -5.86 | -5.75 | -5.65 | -5.39 | -5.18 | -4.75 | -4.34 | -3.95 | -3.35 | -2.59 | -1.72 |
| 3.47 | -5.60 | -5.49 | -5.31 | -5.15 | -4.86 | -4.68 | -4.14 | -3.77 | -3.01 | -2.33 | -1.38 |
| 3.52 | -5.99 | -5.90 | -5.78 | -5.58 | -5.36 | -4.99 | -4.54 | -4.03 | -3.39 | -2.60 | -1.97 |
| 3.57 | -5.75 | -5.62 | -5.49 | -5.32 | -5.07 | -4.76 | -4.35 | -3.89 | -3.31 | -2.59 | -1.72 |
| 3.62 | -5.75 | -5.77 | -5.60 | -5.34 | -5.13 | -4.77 | -4.23 | -3.72 | -3.21 | -2.54 | -1.64 |
| 3.67 | -5.78 | -5.79 | -5.59 | -5.44 | -5.20 | -4.88 | -4.37 | -3.85 | -3.23 | -2.44 | -1.68 |
| 3.72 | -5.27 | -5.14 | -5.04 | -4.82 | -4.67 | -4.22 | -3.78 | -3.29 | -2.64 | -1.89 | -0.93 |
| 3.92 | -5.33 | -5.35 | -5.20 | -4.83 | -4.67 | -4.38 | -3.88 | -3.37 | -2.79 | -2.10 | -1.23 |
| 4.12 | -5.21 | -5.17 | -5.04 | -4.91 | -4.60 | -4.33 | -3.78 | -3.28 | -2.71 | -1.92 | -1.19 |
| 4.32 | -5.38 | -5.38 | -5.22 | -4.92 | -4.84 | -4.44 | -3.99 | -3.52 | -2.78 | -2.13 | -1.28 |
| 4.52 | -5.04 | -4.93 | -4.73 | -4.56 | -4.29 | -4.11 | -3.49 | -2.98 | -2.31 | -1.61 | -0.84 |
| 4.72 | -5.04 | -5.03 | -4.83 | -4.63 | -4.32 | -4.03 | -3.53 | -2.98 | -2.35 | -1.63 | -0.72 |
| 4.92 | -5.22 | -5.12 | -4.95 | -4.67 | -4.47 | -4.16 | -3.70 | -3.20 | -2.48 | -1.84 | -0.89 |
| 5.12 | -5.32 | -5.28 | -5.14 | -4.90 | -4.58 | -4.29 | -3.81 | -3.36 | -2.73 | -1.98 | -1.01 |
| 5.32 | -5.09 | -5.15 | -4.85 | -4.67 | -4.43 | -4.09 | -3.63 | -3.09 | -2.44 | -1.64 | -0.94 |
| 5.52 | -4.86 | -4.80 | -4.77 | -4.56 | -4.26 | -3.90 | -3.49 | -3.03 | -2.31 | -1.70 | -0.72 |
| 5.72 | -5.40 | -5.30 | -5.09 | -4.97 | -4.76 | -4.43 | -3.87 | -3.30 | -2.78 | -2.03 | -1.02 |
| 5.92 | -4.75 | -4.73 | -4.58 | -4.47 | -4.18 | -3.82 | -3.33 | -2.85 | -2.23 | -1.44 | -0.61 |
| 6.12 | -5.07 | -4.87 | -4.81 | -4.55 | -4.53 | -4.04 | -3.60 | -3.08 | -2.33 | -1.72 | -0.78 |
| 6.32 | -4.96 | -4.85 | -4.68 | -4.56 | -4.38 | -3.96 | -3.59 | -2.96 | -2.38 | -1.65 | -0.82 |
| 6.52 | -4.68 | -4.64 | -4.54 | -4.41 | -4.27 | -3.80 | -3.38 | -2.85 | -2.21 | -1.45 | -0.64 |
| 6.72 | -4.88 | -5.01 | -4.74 | -4.58 | -4.29 | -3.91 | -3.56 | -2.96 | -2.39 | -1.69 | -0.83 |
| 6.92 | -4.81 | -4.57 | -4.50 | -4.35 | -4.20 | -3.81 | -3.36 | -2.70 | -2.12 | -1.50 | -0.62 |
| 7.12 | -4.20 | -4.07 | -4.00 | -3.91 | -3.58 | -3.25 | -2.82 | -2.33 | -1.70 | -0.97 | -0.13 |
| 7.32 | -4.79 | -4.63 | -4.45 | -4.25 | -4.11 | -3.67 | -3.18 | -2.74 | -2.08 | -1.41 | -0.41 |
| 7.52 | -4.55 | -4.41 | -4.32 | -4.14 | -4.00 | -3.70 | -3.10 | -2.59 | -2.05 | -1.37 | -0.48 |
| 7.72 | -4.93 | -4.82 | -4.74 | -4.48 | -4.25 | -4.03 | -3.60 | -3.06 | -2.52 | -1.73 | -0.82 |
| 7.92 | -4.51 | -4.45 | -4.36 | -4.19 | -4.06 | -3.65 | -3.21 | -2.68 | -2.05 | -1.30 | -0.47 |
| 8.12 | -4.52 | -4.38 | -4.30 | -4.09 | -3.98 | -3.49 | -3.06 | -2.61 | -2.02 | -1.26 | -0.45 |
| 8.32 | -4.50 | -4.44 | -4.27 | -4.12 | -3.94 | -3.60 | -3.12 | -2.60 | -1.99 | -1.34 | -0.42 |
| 8.52 | -4.51 | -4.37 | -4.34 | -4.20 | -4.05 | -3.78 | -3.19 | -2.72 | -2.17 | -1.45 | -0.53 |
| 8.72 | -4.62 | -4.52 | -4.28 | -4.17 | -3.96 | -3.55 | -3.24 | -2.68 | -2.13 | -1.44 | -0.59 |
| 8.92 | -4.87 | -4.69 | -4.68 | -4.42 | -4.25 | -3.94 | -3.38 | -2.98 | -2.40 | -1.53 | -0.76 |
| 9.12 | -4.77 | -4.67 | -4.51 | -4.33 | -4.02 | -3.81 | -3.34 | -2.84 | -2.23 | -1.53 | -0.62 |
| 9.32 | -5.00 | -4.86 | -4.88 | -4.60 | -4.41 | -4.08 | -3.70 | -3.12 | -2.49 | -1.69 | -0.82 |
| 9.52 | -4.54 | -4.52 | -4.43 | -4.35 | -4.14 | -3.77 | -3.33 | -2.78 | -2.08 | -1.39 | -0.59 |
| 9.72 | -4.53 | -4.44 | -4.33 | -4.27 | -4.01 | -3.75 | -3.35 | -2.78 | -2.28 | -1.53 | -0.58 |

|       |       |       |       |       |       |       |       |       |       |       |       |
|-------|-------|-------|-------|-------|-------|-------|-------|-------|-------|-------|-------|
| 9.92  | -4.82 | -4.79 | -4.53 | -4.51 | -4.18 | -3.92 | -3.40 | -2.93 | -2.35 | -1.63 | -0.74 |
| 10.12 | -4.34 | -4.38 | -4.14 | -4.14 | -3.81 | -3.48 | -2.96 | -2.58 | -1.97 | -1.19 | -0.35 |
| 10.32 | -4.36 | -4.37 | -4.27 | -4.13 | -3.91 | -3.62 | -3.18 | -2.69 | -2.14 | -1.34 | -0.45 |
| 10.52 | -4.52 | -4.38 | -4.42 | -4.23 | -3.94 | -3.64 | -3.25 | -2.72 | -2.27 | -1.47 | -0.67 |
| 10.72 | -4.42 | -4.37 | -4.24 | -4.12 | -3.90 | -3.62 | -3.12 | -2.68 | -2.12 | -1.39 | -0.60 |
| 10.92 | -4.56 | -4.44 | -4.38 | -4.20 | -4.05 | -3.68 | -3.32 | -2.73 | -2.18 | -1.52 | -0.57 |
| 11.12 | -4.75 | -4.72 | -4.52 | -4.39 | -4.15 | -3.92 | -3.53 | -3.01 | -2.41 | -1.63 | -0.77 |
| 11.32 | -4.37 | -4.41 | -4.30 | -4.09 | -3.95 | -3.63 | -3.14 | -2.67 | -2.13 | -1.38 | -0.59 |
| 11.52 | -4.03 | -4.06 | -3.93 | -3.83 | -3.55 | -3.27 | -2.80 | -2.31 | -1.71 | -1.11 | -0.28 |
| 11.72 | -4.36 | -4.34 | -4.23 | -4.11 | -3.87 | -3.59 | -3.08 | -2.63 | -2.00 | -1.32 | -0.43 |
| 11.92 | -3.90 | -3.84 | -3.77 | -3.63 | -3.42 | -3.23 | -2.65 | -2.29 | -1.69 | -0.91 | -0.16 |
| 12.12 | -3.77 | -3.73 | -3.65 | -3.52 | -3.37 | -3.15 | -2.61 | -2.21 | -1.64 | -1.05 | -0.24 |
| 12.32 | -4.29 | -4.20 | -4.18 | -3.92 | -3.76 | -3.49 | -3.16 | -2.53 | -1.98 | -1.26 | -0.47 |
| 12.52 | -4.23 | -4.12 | -3.93 | -3.78 | -3.64 | -3.36 | -2.88 | -2.36 | -1.71 | -0.99 | -0.24 |
| 12.72 | -4.75 | -4.68 | -4.51 | -4.37 | -4.16 | -3.83 | -3.48 | -2.90 | -2.27 | -1.56 | -0.81 |
| 12.92 | -4.38 | -4.25 | -4.20 | -4.02 | -3.73 | -3.61 | -3.13 | -2.57 | -2.01 | -1.28 | -0.51 |
| 13.12 | -4.13 | -4.10 | -3.96 | -3.83 | -3.69 | -3.36 | -2.80 | -2.37 | -1.90 | -1.25 | -0.42 |
| 13.32 | -4.84 | -4.78 | -4.70 | -4.43 | -4.24 | -3.98 | -3.51 | -2.98 | -2.42 | -1.74 | -0.89 |
| 13.52 | -4.45 | -4.34 | -4.27 | -4.09 | -3.87 | -3.65 | -3.12 | -2.63 | -2.06 | -1.32 | -0.51 |
| 13.72 | -4.34 | -4.30 | -4.28 | -3.88 | -3.81 | -3.53 | -2.98 | -2.58 | -1.96 | -1.23 | -0.36 |
| 13.92 | -4.45 | -4.44 | -4.33 | -4.17 | -3.96 | -3.57 | -3.21 | -2.73 | -2.14 | -1.40 | -0.49 |
| 14    | -4.38 | -4.25 | -4.19 | -4.00 | -3.82 | -3.56 | -3.09 | -2.74 | -2.08 | -1.48 | -0.56 |
| 14.08 | -4.46 | -4.30 | -4.26 | -4.21 | -3.97 | -3.67 | -3.30 | -2.78 | -2.23 | -1.53 | -0.77 |
| 14.17 | -4.11 | -3.98 | -3.87 | -3.75 | -3.64 | -3.27 | -2.89 | -2.39 | -1.82 | -1.06 | -0.36 |
| 14.27 | -4.31 | -4.26 | -4.15 | -4.19 | -3.90 | -3.60 | -3.08 | -2.61 | -2.07 | -1.35 | -0.45 |
| 14.38 | -4.31 | -4.39 | -4.27 | -4.09 | -3.87 | -3.54 | -3.10 | -2.69 | -2.10 | -1.40 | -0.48 |
| 14.49 | -4.36 | -4.21 | -4.32 | -4.08 | -3.97 | -3.66 | -3.16 | -2.73 | -2.16 | -1.47 | -0.60 |
| 14.61 | -4.58 | -4.55 | -4.32 | -4.23 | -4.09 | -3.72 | -3.38 | -2.90 | -2.29 | -1.54 | -0.67 |
| 14.75 | -4.31 | -4.33 | -4.30 | -4.09 | -3.90 | -3.64 | -3.23 | -2.66 | -2.15 | -1.37 | -0.60 |
| 14.89 | -4.31 | -4.44 | -4.35 | -4.15 | -3.95 | -3.67 | -3.17 | -2.74 | -2.15 | -1.50 | -0.57 |
| 15.05 | -4.38 | -4.23 | -4.21 | -4.08 | -3.85 | -3.53 | -3.16 | -2.59 | -2.04 | -1.34 | -0.46 |
| 15.21 | -4.37 | -4.30 | -4.25 | -4.03 | -3.88 | -3.48 | -3.12 | -2.63 | -1.96 | -1.36 | -0.44 |
| 15.39 | -4.34 | -4.32 | -4.28 | -3.98 | -3.83 | -3.61 | -3.15 | -2.77 | -2.10 | -1.33 | -0.59 |
| 15.59 | -4.34 | -4.36 | -4.26 | -4.06 | -3.88 | -3.65 | -3.20 | -2.67 | -2.12 | -1.46 | -0.54 |
| 15.8  | -4.32 | -4.33 | -4.31 | -4.05 | -3.89 | -3.57 | -3.30 | -2.71 | -2.15 | -1.35 | -0.62 |
| 16.02 | -4.08 | -4.21 | -4.06 | -3.91 | -3.69 | -3.42 | -3.00 | -2.46 | -1.93 | -1.21 | -0.30 |
| 16.27 | -4.20 | -4.10 | -3.99 | -3.92 | -3.65 | -3.38 | -2.93 | -2.49 | -1.92 | -1.04 | -0.29 |
| 16.53 | -4.07 | -4.06 | -3.98 | -3.86 | -3.72 | -3.37 | -2.81 | -2.48 | -1.78 | -1.13 | -0.21 |
| 16.81 | -4.26 | -4.31 | -4.22 | -4.05 | -3.77 | -3.58 | -3.20 | -2.72 | -1.89 | -1.37 | -0.50 |
| 17.12 | -4.27 | -4.10 | -4.13 | -3.91 | -3.75 | -3.50 | -3.07 | -2.57 | -1.91 | -1.24 | -0.41 |
| 17.45 | -4.32 | -4.21 | -4.22 | -4.00 | -3.92 | -3.61 | -3.09 | -2.63 | -2.08 | -1.38 | -0.60 |
| 17.81 | -4.09 | -4.07 | -4.05 | -3.84 | -3.61 | -3.39 | -2.92 | -2.39 | -1.99 | -1.17 | -0.30 |
| 18.19 | -4.15 | -4.12 | -4.03 | -3.91 | -3.70 | -3.44 | -3.01 | -2.51 | -1.96 | -1.15 | -0.36 |
| 18.6  | -4.10 | -4.09 | -4.00 | -3.82 | -3.63 | -3.38 | -3.05 | -2.49 | -1.99 | -1.32 | -0.41 |
| 19.05 | -4.50 | -4.54 | -4.40 | -4.26 | -4.09 | -3.78 | -3.31 | -2.99 | -2.40 | -1.67 | -0.83 |
| 19.53 | -4.14 | -4.01 | -3.98 | -3.77 | -3.53 | -3.27 | -2.79 | -2.36 | -1.78 | -1.06 | -0.24 |
| 20.05 | -4.13 | -4.13 | -4.05 | -3.89 | -3.83 | -3.46 | -3.07 | -2.51 | -1.99 | -1.39 | -0.49 |
| 20.61 | -4.33 | -4.35 | -4.19 | -3.98 | -3.81 | -3.51 | -3.09 | -2.57 | -2.07 | -1.32 | -0.50 |
| 21.22 | -4.40 | -4.34 | -4.26 | -4.08 | -4.01 | -3.70 | -3.21 | -2.75 | -2.21 | -1.42 | -0.69 |
| 21.87 | -3.93 | -3.88 | -3.84 | -3.69 | -3.56 | -3.37 | -2.81 | -2.39 | -1.76 | -1.16 | -0.25 |

|        |       |       |       |       |       |       |       |       |       |       |       |
|--------|-------|-------|-------|-------|-------|-------|-------|-------|-------|-------|-------|
| 22.57  | -4.27 | -4.29 | -4.17 | -3.95 | -3.90 | -3.57 | -3.21 | -2.62 | -2.01 | -1.42 | -0.53 |
| 23.33  | -3.87 | -3.83 | -3.82 | -3.66 | -3.41 | -3.23 | -2.76 | -2.28 | -1.69 | -1.03 | -0.17 |
| 24.15  | -3.90 | -3.78 | -3.87 | -3.57 | -3.41 | -3.10 | -2.75 | -2.26 | -1.69 | -0.93 | -0.09 |
| 25.03  | -4.08 | -3.98 | -3.86 | -3.64 | -3.49 | -3.30 | -2.86 | -2.29 | -1.75 | -1.06 | -0.20 |
| 25.98  | -4.51 | -4.55 | -4.46 | -4.41 | -4.09 | -3.82 | -3.45 | -2.93 | -2.37 | -1.71 | -0.72 |
| 27.01  | -4.47 | -4.45 | -4.42 | -4.29 | -4.06 | -3.83 | -3.36 | -2.94 | -2.41 | -1.73 | -0.78 |
| 28.11  | -4.03 | -3.86 | -3.88 | -3.80 | -3.59 | -3.35 | -2.90 | -2.45 | -1.85 | -1.18 | -0.34 |
| 29.3   | -4.39 | -4.35 | -4.29 | -4.16 | -3.91 | -3.66 | -3.18 | -2.71 | -2.10 | -1.36 | -0.47 |
| 30.59  | -3.94 | -4.09 | -3.84 | -3.77 | -3.50 | -3.28 | -2.77 | -2.30 | -1.91 | -1.05 | -0.38 |
| 31.98  | -4.17 | -4.19 | -3.99 | -3.85 | -3.71 | -3.43 | -2.90 | -2.46 | -1.86 | -1.17 | -0.28 |
| 33.47  | -3.82 | -3.82 | -3.77 | -3.61 | -3.52 | -3.15 | -2.67 | -2.27 | -1.74 | -1.00 | -0.24 |
| 35.09  | -3.96 | -3.92 | -3.74 | -3.70 | -3.50 | -3.19 | -2.87 | -2.46 | -1.85 | -1.01 | -0.16 |
| 36.83  | -4.03 | -3.90 | -3.82 | -3.65 | -3.40 | -3.25 | -2.77 | -2.21 | -1.66 | -0.94 | -0.12 |
| 38.71  | -3.88 | -4.05 | -3.79 | -3.69 | -3.42 | -3.24 | -2.80 | -2.30 | -1.69 | -1.01 | -0.09 |
| 40.73  | -4.04 | -4.05 | -3.92 | -3.91 | -3.60 | -3.24 | -2.91 | -2.24 | -1.68 | -0.90 | -0.12 |
| 42.92  | -3.91 | -4.00 | -3.84 | -3.64 | -3.39 | -3.22 | -2.70 | -2.17 | -1.54 | -0.82 | 0.14  |
| 45.27  | -4.08 | -4.08 | -3.99 | -3.84 | -3.64 | -3.31 | -2.99 | -2.41 | -1.78 | -1.13 | -0.21 |
| 47.81  | -4.53 | -4.49 | -4.42 | -4.22 | -3.98 | -3.65 | -3.22 | -2.78 | -2.09 | -1.42 | -0.49 |
| 50.55  | -4.00 | -3.95 | -3.94 | -3.73 | -3.46 | -3.11 | -2.68 | -2.30 | -1.65 | -0.88 | -0.15 |
| 53.51  | -4.19 | -4.18 | -3.94 | -3.84 | -3.58 | -3.28 | -2.76 | -2.42 | -1.75 | -1.08 | -0.31 |
| 56.69  | -3.97 | -3.92 | -3.82 | -3.64 | -3.44 | -3.18 | -2.66 | -2.24 | -1.48 | -0.78 | 0.21  |
| 60.13  | -3.88 | -3.83 | -3.70 | -3.57 | -3.24 | -3.01 | -2.67 | -2.09 | -1.44 | -0.77 | 0.09  |
| 63.84  | -4.08 | -4.01 | -3.90 | -3.72 | -3.59 | -3.30 | -2.76 | -2.25 | -1.58 | -0.83 | 0.06  |
| 67.83  | -4.43 | -4.35 | -4.22 | -4.06 | -3.78 | -3.49 | -3.01 | -2.52 | -1.85 | -1.13 | -0.10 |
| 72.15  | -4.11 | -4.11 | -3.91 | -3.59 | -3.51 | -3.19 | -2.75 | -2.18 | -1.62 | -0.84 | 0.01  |
| 76.8   | -3.97 | -4.03 | -3.83 | -3.62 | -3.49 | -3.03 | -2.64 | -2.15 | -1.47 | -0.74 | 0.08  |
| 81.81  | -3.85 | -3.76 | -3.62 | -3.42 | -3.22 | -2.93 | -2.35 | -1.84 | -1.16 | -0.48 | 0.42  |
| 87.22  | -3.71 | -3.70 | -3.57 | -3.39 | -3.15 | -2.93 | -2.28 | -1.86 | -1.24 | -0.49 | 0.47  |
| 93.06  | -3.84 | -3.80 | -3.49 | -3.34 | -3.13 | -2.81 | -2.30 | -1.69 | -1.06 | -0.30 | 0.61  |
| 99.35  | -3.90 | -3.74 | -3.56 | -3.40 | -3.07 | -2.66 | -2.39 | -1.64 | -1.04 | -0.19 | 0.74  |
| 106.13 | -3.66 | -3.67 | -3.36 | -3.23 | -2.98 | -2.66 | -2.11 | -1.48 | -0.93 | -0.09 | 0.77  |
| 113.45 | -3.67 | -3.62 | -3.47 | -3.20 | -2.99 | -2.62 | -2.09 | -1.66 | -0.86 | -0.06 | 0.89  |
| 121.34 | -3.80 | -3.79 | -3.55 | -3.38 | -3.16 | -2.73 | -2.19 | -1.69 | -1.04 | -0.31 | 0.70  |
| 129.86 | -3.98 | -3.84 | -3.79 | -3.50 | -3.20 | -2.80 | -2.30 | -1.67 | -1.11 | -0.25 | 0.65  |
| 139.04 | -3.43 | -3.32 | -2.96 | -2.78 | -2.46 | -2.07 | -1.48 | -0.92 | -0.33 | 0.47  | 1.44  |
| 148.94 | -3.52 | -3.41 | -3.20 | -3.00 | -2.58 | -2.27 | -1.63 | -1.07 | -0.27 | 0.47  | 1.40  |
| 159.62 | -3.28 | -3.28 | -3.02 | -2.77 | -2.56 | -2.13 | -1.60 | -0.95 | -0.21 | 0.49  | 1.43  |
| 171.14 | -3.26 | -3.22 | -3.07 | -2.69 | -2.35 | -2.02 | -1.43 | -0.95 | -0.19 | 0.67  | 1.58  |
| 183.56 | -3.40 | -3.33 | -3.16 | -3.00 | -2.57 | -2.22 | -1.65 | -1.03 | -0.35 | 0.48  | 1.42  |
| 196.96 | -3.39 | -3.27 | -3.03 | -2.84 | -2.49 | -2.09 | -1.56 | -0.88 | -0.09 | 0.66  | 1.75  |
| 211.41 | -3.22 | -3.16 | -2.86 | -2.63 | -2.24 | -1.91 | -1.31 | -0.59 | 0.19  | 0.99  | 2.11  |
| 226.99 | -3.15 | -3.00 | -2.80 | -2.39 | -2.11 | -1.61 | -0.89 | -0.44 | 0.32  | 1.34  | 2.25  |
| 243.8  | -3.24 | -3.00 | -2.83 | -2.44 | -2.17 | -1.68 | -1.00 | -0.43 | 0.28  | 1.26  | 2.33  |
| 261.93 | -2.88 | -2.78 | -2.61 | -2.32 | -1.79 | -1.48 | -0.78 | -0.15 | 0.65  | 1.57  | 2.61  |
| 281.48 | -2.71 | -2.58 | -2.24 | -1.93 | -1.57 | -1.20 | -0.45 | 0.20  | 0.94  | 1.99  | 2.93  |
| 302.56 | -2.76 | -2.49 | -2.26 | -1.92 | -1.50 | -1.01 | -0.36 | 0.30  | 1.01  | 2.02  | 3.11  |
| 325.3  | -2.76 | -2.55 | -2.25 | -1.88 | -1.43 | -0.96 | -0.29 | 0.29  | 1.14  | 2.17  | 3.13  |
| 349.83 | -2.52 | -2.40 | -2.06 | -1.67 | -1.46 | -0.79 | -0.23 | 0.53  | 1.23  | 2.22  | 3.24  |
| 376.28 | -2.53 | -2.29 | -2.00 | -1.64 | -1.26 | -0.68 | -0.07 | 0.69  | 1.55  | 2.46  | 3.52  |
| 404.81 | -2.15 | -1.90 | -1.56 | -1.29 | -0.92 | -0.34 | 0.43  | 1.11  | 1.80  | 2.85  | 3.86  |

|         |       |       |       |       |       |       |      |      |      |      |      |
|---------|-------|-------|-------|-------|-------|-------|------|------|------|------|------|
| 435.58  | -2.50 | -2.19 | -1.75 | -1.40 | -0.89 | -0.44 | 0.23 | 0.93 | 1.89 | 2.77 | 3.91 |
| 468.76  | -2.08 | -1.76 | -1.52 | -1.02 | -0.67 | -0.08 | 0.61 | 1.44 | 2.31 | 3.30 | 4.44 |
| 504.55  | -1.82 | -1.64 | -1.34 | -0.91 | -0.47 | 0.03  | 0.88 | 1.67 | 2.55 | 3.40 | 4.51 |
| 543.15  | -1.81 | -1.59 | -1.35 | -0.88 | -0.44 | 0.08  | 0.79 | 1.67 | 2.56 | 3.45 | 4.68 |
| 584.78  | -1.58 | -1.38 | -1.10 | -0.58 | -0.06 | 0.53  | 1.32 | 1.96 | 2.90 | 3.90 | 5.06 |
| 629.68  | -1.57 | -1.26 | -0.92 | -0.43 | 0.05  | 0.59  | 1.35 | 2.23 | 2.99 | 4.00 | 5.15 |
| 678.1   | -1.14 | -0.80 | -0.48 | -0.01 | 0.45  | 1.09  | 1.87 | 2.56 | 3.48 | 4.54 | 5.68 |
| 730.33  | -1.35 | -1.21 | -0.71 | -0.35 | 0.22  | 0.84  | 1.64 | 2.36 | 3.30 | 4.28 | 5.46 |
| 786.65  | -1.39 | -1.21 | -0.79 | -0.37 | 0.27  | 0.83  | 1.60 | 2.43 | 3.27 | 4.31 | 5.52 |
| 847.4   | -1.39 | -1.05 | -0.62 | -0.10 | 0.33  | 1.02  | 1.69 | 2.70 | 3.52 | 4.56 | 5.78 |
| 912.92  | -1.15 | -0.81 | -0.53 | -0.01 | 0.51  | 1.12  | 1.86 | 2.70 | 3.61 | 4.56 | 5.84 |
| 983.58  | -1.11 | -0.90 | -0.43 | 0.11  | 0.56  | 1.16  | 1.90 | 2.81 | 3.78 | 4.71 | 5.96 |
| 1059.78 | -1.00 | -0.70 | -0.36 | 0.17  | 0.63  | 1.32  | 2.10 | 2.92 | 3.86 | 4.92 | 6.08 |
| 1141.98 | -0.76 | -0.51 | -0.02 | 0.43  | 0.92  | 1.60  | 2.37 | 3.15 | 4.06 | 5.13 | 6.34 |
| 1230.62 | -0.82 | -0.56 | -0.16 | 0.34  | 0.83  | 1.49  | 2.22 | 3.04 | 4.01 | 5.06 | 6.23 |
| 1326.23 | -0.87 | -0.56 | -0.22 | 0.41  | 0.95  | 1.48  | 2.30 | 3.15 | 4.14 | 5.27 | 6.43 |
| 1429.34 | -0.60 | -0.18 | 0.18  | 0.52  | 1.09  | 1.78  | 2.61 | 3.44 | 4.40 | 5.41 | 6.60 |
| 1540.54 | -1.05 | -0.81 | -0.45 | 0.12  | 0.68  | 1.34  | 2.07 | 3.00 | 3.93 | 5.04 | 6.23 |
| 1660.48 | -0.88 | -0.46 | -0.09 | 0.40  | 0.93  | 1.57  | 2.43 | 3.35 | 4.18 | 5.36 | 6.56 |
| 1789.83 | -0.95 | -0.71 | -0.28 | 0.12  | 0.78  | 1.49  | 2.18 | 3.07 | 4.05 | 5.19 | 6.31 |
| 1929.34 | -0.98 | -0.45 | -0.10 | 0.37  | 0.99  | 1.65  | 2.50 | 3.41 | 4.33 | 5.49 | 6.68 |
| 2079.8  | -1.11 | -0.83 | -0.49 | 0.01  | 0.48  | 1.24  | 1.95 | 2.88 | 3.90 | 4.93 | 6.07 |
| 2242.08 | -0.86 | -0.55 | -0.05 | 0.41  | 0.92  | 1.77  | 2.48 | 3.33 | 4.28 | 5.39 | 6.64 |
| 2417.1  | -0.95 | -0.65 | -0.11 | 0.26  | 0.93  | 1.55  | 2.36 | 3.15 | 4.12 | 5.29 | 6.55 |
| 2605.85 | -1.12 | -0.80 | -0.33 | 0.22  | 0.74  | 1.44  | 2.30 | 3.04 | 3.97 | 5.12 | 6.27 |
| 2809.43 | -0.98 | -0.55 | -0.25 | 0.22  | 0.77  | 1.50  | 2.29 | 3.14 | 4.13 | 5.16 | 6.41 |
| 3028.99 | -0.89 | -0.66 | -0.14 | 0.36  | 0.82  | 1.48  | 2.27 | 3.04 | 3.99 | 5.16 | 6.29 |
| 3265.79 | -0.90 | -0.44 | -0.19 | 0.32  | 0.91  | 1.57  | 2.31 | 3.16 | 4.04 | 5.15 | 6.34 |
| 3521.18 | -1.37 | -0.98 | -0.60 | -0.01 | 0.44  | 1.10  | 2.03 | 2.78 | 3.74 | 4.74 | 5.95 |
| 3796.62 | -1.13 | -0.52 | -0.31 | 0.31  | 0.80  | 1.60  | 2.26 | 3.11 | 4.11 | 5.21 | 6.38 |

| Wavelength (nm) | 537.62 | 539.03 | 540.44 | 541.85 | 543.25 | 544.66 | 546.07 | 547.48 | 548.89 | 550.30 | 551.71 |
|-----------------|--------|--------|--------|--------|--------|--------|--------|--------|--------|--------|--------|
| Time (ps)       |        |        |        |        |        |        |        |        |        |        |        |
| -3.28           | 0.35   | 0.26   | 0.19   | 0.16   | 0.28   | 0.21   | 0.22   | 0.18   | 0.12   | 0.20   | 0.24   |
| -2.78           | 0.09   | 0.11   | 0.07   | 0.12   | 0.11   | 0.15   | 0.13   | 0.09   | 0.07   | 0.10   | 0.10   |
| -2.28           | 0.17   | 0.20   | 0.24   | 0.20   | 0.26   | 0.21   | 0.25   | 0.18   | 0.19   | 0.19   | 0.24   |
| -1.78           | -0.01  | -0.07  | -0.01  | 0.03   | -0.04  | 0.02   | 0.00   | 0.06   | 0.05   | 0.05   | 0.02   |
| -1.28           | -0.24  | -0.21  | -0.12  | -0.20  | -0.27  | -0.26  | -0.23  | -0.15  | -0.18  | -0.19  | -0.27  |
| -0.78           | 0.00   | 0.07   | 0.02   | 0.13   | 0.02   | 0.04   | 0.04   | -0.01  | 0.08   | 0.05   | 0.03   |
| -0.28           | -0.60  | -0.63  | -0.68  | -0.69  | -0.61  | -0.64  | -0.63  | -0.61  | -0.64  | -0.65  | -0.65  |
| 0.22            | 0.24   | 0.27   | 0.29   | 0.24   | 0.24   | 0.28   | 0.22   | 0.25   | 0.32   | 0.27   | 0.29   |
| 0.32            | 0.19   | 0.16   | 0.16   | 0.24   | 0.20   | 0.23   | 0.30   | 0.21   | 0.32   | 0.27   | 0.19   |
| 0.42            | -0.09  | -0.09  | -0.13  | -0.06  | -0.10  | -0.13  | -0.10  | -0.09  | -0.11  | -0.01  | -0.04  |
| 0.52            | -0.23  | -0.18  | -0.18  | -0.20  | -0.22  | -0.27  | -0.19  | -0.22  | -0.20  | -0.19  | -0.23  |
| 0.62            | 0.15   | 0.07   | 0.15   | 0.16   | 0.23   | 0.20   | 0.11   | 0.14   | 0.21   | 0.18   | 0.23   |
| 0.72            | -0.36  | -0.31  | -0.28  | -0.30  | -0.24  | -0.29  | -0.29  | -0.22  | -0.23  | -0.26  | -0.26  |
| 0.77            | 0.25   | 0.12   | 0.11   | 0.22   | 0.20   | 0.12   | 0.27   | 0.17   | 0.23   | 0.21   | 0.19   |
| 0.82            | 0.11   | 0.08   | 0.13   | 0.14   | 0.12   | 0.11   | 0.14   | 0.08   | 0.11   | 0.04   | 0.10   |

|      |        |        |        |       |       |       |       |       |       |       |       |
|------|--------|--------|--------|-------|-------|-------|-------|-------|-------|-------|-------|
| 0.87 | -0.10  | -0.13  | -0.08  | -0.08 | -0.06 | -0.15 | -0.08 | -0.12 | -0.13 | -0.16 | -0.11 |
| 0.92 | -0.14  | -0.10  | -0.10  | -0.13 | -0.13 | -0.16 | -0.04 | -0.17 | -0.13 | -0.09 | -0.07 |
| 0.97 | -0.08  | -0.05  | -0.05  | 0.10  | 0.00  | -0.05 | -0.02 | -0.01 | 0.00  | 0.00  | 0.04  |
| 1.02 | 0.22   | 0.19   | 0.15   | 0.27  | 0.16  | 0.15  | 0.18  | 0.23  | 0.24  | 0.27  | 0.27  |
| 1.07 | -0.01  | -0.06  | 0.01   | 0.04  | 0.00  | 0.03  | 0.01  | 0.05  | 0.04  | 0.05  | -0.03 |
| 1.12 | -0.30  | -0.21  | -0.19  | -0.15 | -0.22 | -0.23 | -0.17 | -0.17 | -0.19 | -0.21 | -0.18 |
| 1.17 | -0.17  | -0.13  | -0.09  | -0.12 | -0.06 | -0.11 | -0.09 | -0.16 | -0.04 | -0.14 | -0.05 |
| 1.22 | 0.29   | 0.28   | 0.33   | 0.33  | 0.32  | 0.30  | 0.36  | 0.35  | 0.31  | 0.37  | 0.37  |
| 1.27 | 0.02   | -0.03  | 0.01   | 0.08  | 0.11  | 0.12  | 0.09  | -0.09 | 0.08  | 0.12  | 0.05  |
| 1.32 | -0.11  | -0.12  | -0.09  | -0.15 | -0.11 | -0.17 | -0.12 | -0.16 | -0.13 | -0.09 | -0.15 |
| 1.37 | 0.02   | -0.03  | -0.09  | -0.07 | -0.03 | -0.07 | 0.00  | -0.09 | -0.02 | -0.04 | 0.05  |
| 1.42 | -0.45  | -0.36  | -0.37  | -0.39 | -0.48 | -0.44 | -0.38 | -0.39 | -0.30 | -0.38 | -0.25 |
| 1.47 | 0.50   | 0.68   | 0.86   | 1.16  | 1.29  | 1.41  | 1.48  | 1.60  | 1.48  | 1.56  | 1.58  |
| 1.52 | -2.79  | -2.02  | -1.20  | -0.46 | 0.37  | 1.15  | 1.80  | 2.40  | 2.92  | 3.36  | 3.79  |
| 1.57 | -7.63  | -6.50  | -5.32  | -4.14 | -3.00 | -1.69 | -0.50 | 0.71  | 1.82  | 2.87  | 3.84  |
| 1.62 | -10.97 | -9.91  | -8.74  | -7.43 | -6.21 | -4.81 | -3.40 | -1.96 | -0.54 | 0.90  | 2.27  |
| 1.67 | -12.50 | -11.54 | -10.45 | -9.36 | -8.20 | -6.91 | -5.68 | -4.32 | -2.81 | -1.49 | -0.06 |
| 1.72 | -11.22 | -10.38 | -9.47  | -8.52 | -7.47 | -6.27 | -5.20 | -4.00 | -2.75 | -1.51 | -0.27 |
| 1.77 | -10.21 | -9.42  | -8.65  | -7.66 | -6.72 | -5.74 | -4.56 | -3.45 | -2.27 | -1.22 | -0.04 |
| 1.82 | -9.92  | -9.12  | -8.38  | -7.45 | -6.51 | -5.51 | -4.43 | -3.40 | -2.36 | -1.23 | -0.19 |
| 1.87 | -9.05  | -8.29  | -7.48  | -6.51 | -5.67 | -4.65 | -3.66 | -2.63 | -1.65 | -0.62 | 0.36  |
| 1.92 | -7.96  | -7.18  | -6.35  | -5.48 | -4.45 | -3.52 | -2.46 | -1.48 | -0.49 | 0.61  | 1.70  |
| 1.97 | -7.30  | -6.54  | -5.63  | -4.68 | -3.76 | -2.74 | -1.72 | -0.65 | 0.38  | 1.47  | 2.49  |
| 2.02 | -6.08  | -5.34  | -4.37  | -3.49 | -2.45 | -1.43 | -0.43 | 0.66  | 1.70  | 2.89  | 3.87  |
| 2.07 | -5.68  | -4.82  | -3.89  | -2.81 | -1.82 | -0.73 | 0.41  | 1.43  | 2.58  | 3.66  | 4.76  |
| 2.12 | -5.56  | -4.74  | -3.82  | -2.83 | -1.82 | -0.76 | 0.18  | 1.31  | 2.44  | 3.48  | 4.51  |
| 2.17 | -5.14  | -4.34  | -3.41  | -2.47 | -1.45 | -0.43 | 0.74  | 1.78  | 2.89  | 3.92  | 4.98  |
| 2.22 | -4.59  | -3.87  | -2.88  | -1.94 | -0.98 | 0.15  | 1.34  | 2.29  | 3.42  | 4.47  | 5.58  |
| 2.27 | -3.91  | -3.07  | -2.09  | -1.11 | -0.06 | 1.09  | 2.17  | 3.38  | 4.45  | 5.48  | 6.60  |
| 2.32 | -3.63  | -2.75  | -1.73  | -0.74 | 0.41  | 1.50  | 2.66  | 3.78  | 5.00  | 6.02  | 7.16  |
| 2.37 | -3.55  | -2.54  | -1.61  | -0.57 | 0.47  | 1.69  | 2.85  | 3.97  | 4.98  | 6.18  | 7.35  |
| 2.42 | -3.32  | -2.46  | -1.46  | -0.45 | 0.61  | 1.71  | 2.90  | 4.04  | 5.24  | 6.40  | 7.51  |
| 2.47 | -3.22  | -2.30  | -1.32  | -0.22 | 0.86  | 1.96  | 3.16  | 4.29  | 5.44  | 6.63  | 7.69  |
| 2.52 | -3.06  | -2.16  | -1.16  | -0.08 | 0.96  | 2.12  | 3.31  | 4.40  | 5.59  | 6.75  | 7.83  |
| 2.57 | -2.69  | -1.72  | -0.90  | 0.32  | 1.43  | 2.54  | 3.72  | 4.92  | 6.13  | 7.22  | 8.42  |
| 2.62 | -2.64  | -1.75  | -0.65  | 0.48  | 1.57  | 2.76  | 3.89  | 5.10  | 6.34  | 7.52  | 8.62  |
| 2.67 | -2.41  | -1.51  | -0.54  | 0.54  | 1.74  | 2.80  | 4.05  | 5.22  | 6.35  | 7.57  | 8.77  |
| 2.72 | -2.30  | -1.44  | -0.45  | 0.60  | 1.68  | 2.83  | 4.07  | 5.21  | 6.32  | 7.54  | 8.71  |
| 2.77 | -2.66  | -1.70  | -0.64  | 0.44  | 1.62  | 2.79  | 3.98  | 5.14  | 6.36  | 7.58  | 8.76  |
| 2.82 | -1.63  | -0.65  | 0.34   | 1.48  | 2.64  | 3.78  | 5.00  | 6.19  | 7.44  | 8.55  | 9.75  |
| 2.87 | -2.03  | -1.10  | 0.10   | 1.14  | 2.26  | 3.49  | 4.73  | 5.77  | 7.07  | 8.31  | 9.43  |
| 2.92 | -1.35  | -0.44  | 0.61   | 1.76  | 2.86  | 4.05  | 5.32  | 6.55  | 7.81  | 9.04  | 10.20 |
| 2.97 | -2.00  | -0.97  | 0.13   | 1.18  | 2.35  | 3.63  | 4.90  | 6.18  | 7.47  | 8.67  | 9.91  |
| 3.02 | -1.79  | -0.88  | 0.14   | 1.36  | 2.54  | 3.66  | 4.98  | 6.23  | 7.37  | 8.62  | 9.84  |
| 3.07 | -1.41  | -0.39  | 0.61   | 1.83  | 2.84  | 4.04  | 5.22  | 6.53  | 7.75  | 9.00  | 10.07 |
| 3.12 | -1.02  | -0.08  | 1.01   | 2.26  | 3.46  | 4.67  | 6.00  | 7.24  | 8.57  | 9.77  | 11.04 |
| 3.17 | -1.21  | -0.08  | 0.87   | 2.07  | 3.33  | 4.52  | 5.78  | 7.02  | 8.24  | 9.55  | 10.77 |
| 3.22 | -1.17  | -0.25  | 0.85   | 1.99  | 3.18  | 4.34  | 5.62  | 6.86  | 8.22  | 9.42  | 10.63 |
| 3.27 | -1.28  | -0.28  | 0.74   | 1.96  | 3.08  | 4.31  | 5.58  | 6.76  | 8.06  | 9.26  | 10.40 |
| 3.32 | -0.75  | 0.16   | 1.28   | 2.49  | 3.70  | 4.92  | 6.20  | 7.41  | 8.74  | 10.03 | 11.26 |

|       |       |      |      |      |      |      |      |      |       |       |       |
|-------|-------|------|------|------|------|------|------|------|-------|-------|-------|
| 3.37  | -0.74 | 0.24 | 1.18 | 2.42 | 3.54 | 4.86 | 6.03 | 7.32 | 8.71  | 9.88  | 11.13 |
| 3.42  | -0.81 | 0.25 | 1.21 | 2.45 | 3.60 | 4.82 | 6.07 | 7.32 | 8.53  | 9.87  | 11.04 |
| 3.47  | -0.53 | 0.53 | 1.62 | 2.68 | 3.83 | 5.18 | 6.46 | 7.69 | 9.02  | 10.18 | 11.50 |
| 3.52  | -0.95 | 0.10 | 1.10 | 2.40 | 3.53 | 4.76 | 6.14 | 7.35 | 8.67  | 10.00 | 11.28 |
| 3.57  | -0.88 | 0.13 | 1.33 | 2.43 | 3.54 | 4.83 | 6.04 | 7.33 | 8.70  | 9.94  | 11.10 |
| 3.62  | -0.74 | 0.29 | 1.44 | 2.51 | 3.80 | 5.07 | 6.39 | 7.54 | 8.91  | 10.25 | 11.47 |
| 3.67  | -0.68 | 0.31 | 1.42 | 2.66 | 3.80 | 5.12 | 6.38 | 7.58 | 9.02  | 10.30 | 11.50 |
| 3.72  | -0.08 | 0.98 | 2.16 | 3.39 | 4.61 | 5.85 | 7.07 | 8.45 | 9.78  | 11.15 | 12.36 |
| 3.92  | -0.35 | 0.73 | 1.70 | 2.95 | 4.12 | 5.35 | 6.60 | 7.87 | 9.27  | 10.44 | 11.71 |
| 4.12  | -0.21 | 0.80 | 1.88 | 3.12 | 4.19 | 5.53 | 6.83 | 8.20 | 9.56  | 10.88 | 12.13 |
| 4.32  | -0.31 | 0.71 | 1.87 | 3.05 | 4.24 | 5.58 | 6.95 | 8.34 | 9.65  | 10.97 | 12.35 |
| 4.52  | 0.18  | 1.38 | 2.44 | 3.74 | 4.89 | 6.12 | 7.50 | 8.83 | 10.22 | 11.56 | 12.87 |
| 4.72  | 0.17  | 1.24 | 2.34 | 3.56 | 4.93 | 6.16 | 7.61 | 8.83 | 10.25 | 11.63 | 12.92 |
| 4.92  | 0.08  | 1.14 | 2.28 | 3.51 | 4.64 | 6.01 | 7.39 | 8.78 | 10.11 | 11.50 | 12.74 |
| 5.12  | -0.04 | 0.95 | 2.11 | 3.32 | 4.64 | 5.91 | 7.35 | 8.65 | 10.13 | 11.40 | 12.82 |
| 5.32  | 0.07  | 1.13 | 2.27 | 3.48 | 4.79 | 6.08 | 7.51 | 8.88 | 10.25 | 11.72 | 12.97 |
| 5.52  | 0.18  | 1.17 | 2.29 | 3.53 | 4.82 | 6.14 | 7.48 | 8.88 | 10.24 | 11.64 | 12.96 |
| 5.72  | -0.01 | 0.95 | 2.11 | 3.43 | 4.67 | 5.95 | 7.43 | 8.77 | 10.18 | 11.56 | 12.98 |
| 5.92  | 0.52  | 1.46 | 2.61 | 3.87 | 5.12 | 6.45 | 7.82 | 9.19 | 10.57 | 12.04 | 13.36 |
| 6.12  | 0.13  | 1.17 | 2.30 | 3.64 | 4.86 | 6.18 | 7.54 | 8.85 | 10.33 | 11.61 | 13.01 |
| 6.32  | 0.17  | 1.17 | 2.30 | 3.56 | 4.75 | 6.04 | 7.44 | 8.79 | 10.21 | 11.60 | 12.91 |
| 6.52  | 0.27  | 1.33 | 2.46 | 3.64 | 4.99 | 6.29 | 7.74 | 9.04 | 10.46 | 11.86 | 13.20 |
| 6.72  | 0.27  | 1.33 | 2.51 | 3.75 | 5.00 | 6.32 | 7.69 | 9.03 | 10.49 | 11.86 | 13.28 |
| 6.92  | 0.20  | 1.41 | 2.53 | 3.72 | 5.05 | 6.23 | 7.64 | 9.00 | 10.37 | 11.78 | 13.10 |
| 7.12  | 0.76  | 1.90 | 3.01 | 4.18 | 5.46 | 6.76 | 8.11 | 9.51 | 10.90 | 12.20 | 13.54 |
| 7.32  | 0.53  | 1.64 | 2.74 | 3.91 | 5.20 | 6.48 | 7.97 | 9.31 | 10.73 | 12.04 | 13.47 |
| 7.52  | 0.34  | 1.44 | 2.43 | 3.77 | 4.99 | 6.39 | 7.82 | 9.13 | 10.53 | 11.88 | 13.23 |
| 7.72  | 0.06  | 1.13 | 2.24 | 3.53 | 4.71 | 6.03 | 7.50 | 8.73 | 10.16 | 11.65 | 13.05 |
| 7.92  | 0.49  | 1.58 | 2.63 | 3.93 | 5.18 | 6.50 | 7.95 | 9.33 | 10.78 | 12.13 | 13.58 |
| 8.12  | 0.59  | 1.55 | 2.69 | 3.95 | 5.18 | 6.60 | 7.85 | 9.26 | 10.67 | 12.11 | 13.39 |
| 8.32  | 0.56  | 1.58 | 2.73 | 3.93 | 5.15 | 6.57 | 7.96 | 9.33 | 10.78 | 12.21 | 13.55 |
| 8.52  | 0.31  | 1.41 | 2.60 | 3.76 | 4.99 | 6.33 | 7.73 | 9.09 | 10.56 | 12.01 | 13.30 |
| 8.72  | 0.34  | 1.37 | 2.53 | 3.71 | 4.99 | 6.25 | 7.75 | 9.12 | 10.54 | 11.93 | 13.28 |
| 8.92  | 0.28  | 1.29 | 2.49 | 3.63 | 4.96 | 6.24 | 7.65 | 9.02 | 10.50 | 11.88 | 13.36 |
| 9.12  | 0.38  | 1.48 | 2.58 | 3.86 | 5.17 | 6.48 | 7.82 | 9.27 | 10.65 | 12.01 | 13.50 |
| 9.32  | 0.08  | 1.15 | 2.32 | 3.57 | 4.95 | 6.24 | 7.70 | 8.97 | 10.46 | 11.98 | 13.32 |
| 9.52  | 0.49  | 1.54 | 2.62 | 3.96 | 5.30 | 6.66 | 8.06 | 9.46 | 10.97 | 12.38 | 13.73 |
| 9.72  | 0.33  | 1.49 | 2.49 | 3.80 | 5.16 | 6.45 | 7.88 | 9.29 | 10.80 | 12.14 | 13.53 |
| 9.92  | 0.29  | 1.22 | 2.44 | 3.69 | 4.96 | 6.31 | 7.79 | 9.16 | 10.62 | 12.08 | 13.50 |
| 10.12 | 0.66  | 1.58 | 2.68 | 3.98 | 5.24 | 6.58 | 7.98 | 9.32 | 10.69 | 12.21 | 13.49 |
| 10.32 | 0.47  | 1.46 | 2.67 | 3.88 | 5.18 | 6.53 | 7.84 | 9.25 | 10.68 | 12.11 | 13.48 |
| 10.52 | 0.39  | 1.36 | 2.58 | 3.80 | 5.02 | 6.39 | 7.82 | 9.14 | 10.59 | 12.02 | 13.38 |
| 10.72 | 0.29  | 1.42 | 2.54 | 3.70 | 4.96 | 6.27 | 7.62 | 8.92 | 10.37 | 11.77 | 13.11 |
| 10.92 | 0.30  | 1.35 | 2.49 | 3.71 | 4.95 | 6.28 | 7.72 | 9.13 | 10.51 | 11.92 | 13.32 |
| 11.12 | 0.18  | 1.28 | 2.35 | 3.66 | 4.88 | 6.29 | 7.59 | 9.00 | 10.50 | 11.96 | 13.34 |
| 11.32 | 0.31  | 1.49 | 2.56 | 3.89 | 5.15 | 6.42 | 7.85 | 9.24 | 10.67 | 12.02 | 13.39 |
| 11.52 | 0.73  | 1.77 | 2.91 | 4.21 | 5.42 | 6.69 | 8.12 | 9.42 | 10.88 | 12.24 | 13.66 |
| 11.72 | 0.42  | 1.43 | 2.57 | 3.81 | 5.03 | 6.36 | 7.78 | 9.23 | 10.57 | 11.96 | 13.36 |
| 11.92 | 0.69  | 1.72 | 2.71 | 3.85 | 5.17 | 6.40 | 7.78 | 9.09 | 10.58 | 11.87 | 13.31 |
| 12.12 | 0.70  | 1.67 | 2.83 | 4.03 | 5.26 | 6.47 | 7.99 | 9.32 | 10.62 | 11.99 | 13.36 |

|       |      |      |      |      |      |      |      |      |       |       |       |
|-------|------|------|------|------|------|------|------|------|-------|-------|-------|
| 12.32 | 0.58 | 1.63 | 2.72 | 3.96 | 5.16 | 6.52 | 7.89 | 9.24 | 10.70 | 12.09 | 13.49 |
| 12.52 | 0.77 | 1.80 | 2.88 | 4.25 | 5.50 | 6.90 | 8.26 | 9.66 | 11.11 | 12.56 | 13.93 |
| 12.72 | 0.35 | 1.36 | 2.53 | 3.80 | 5.06 | 6.45 | 7.95 | 9.32 | 10.67 | 12.16 | 13.56 |
| 12.92 | 0.40 | 1.42 | 2.63 | 3.86 | 5.12 | 6.43 | 7.77 | 9.28 | 10.67 | 12.11 | 13.50 |
| 13.12 | 0.54 | 1.62 | 2.66 | 3.90 | 5.16 | 6.53 | 7.91 | 9.22 | 10.78 | 12.14 | 13.55 |
| 13.32 | 0.14 | 1.16 | 2.29 | 3.56 | 4.85 | 6.30 | 7.63 | 9.02 | 10.47 | 12.05 | 13.38 |
| 13.52 | 0.55 | 1.51 | 2.72 | 3.82 | 5.16 | 6.51 | 8.01 | 9.34 | 10.91 | 12.22 | 13.61 |
| 13.72 | 0.57 | 1.70 | 2.87 | 4.14 | 5.32 | 6.75 | 8.18 | 9.45 | 11.03 | 12.43 | 13.86 |
| 13.92 | 0.39 | 1.52 | 2.68 | 3.88 | 5.21 | 6.59 | 8.02 | 9.51 | 10.99 | 12.32 | 13.80 |
| 14    | 0.35 | 1.34 | 2.50 | 3.70 | 4.89 | 6.18 | 7.62 | 9.03 | 10.46 | 11.84 | 13.19 |
| 14.08 | 0.28 | 1.29 | 2.37 | 3.59 | 5.00 | 6.20 | 7.64 | 9.00 | 10.46 | 11.87 | 13.24 |
| 14.17 | 0.63 | 1.76 | 2.79 | 3.96 | 5.24 | 6.49 | 7.93 | 9.31 | 10.72 | 12.15 | 13.50 |
| 14.27 | 0.43 | 1.50 | 2.70 | 3.86 | 5.21 | 6.52 | 7.96 | 9.31 | 10.69 | 12.15 | 13.55 |
| 14.38 | 0.36 | 1.60 | 2.64 | 4.00 | 5.24 | 6.53 | 7.89 | 9.32 | 10.78 | 12.15 | 13.57 |
| 14.49 | 0.37 | 1.28 | 2.45 | 3.71 | 4.88 | 6.22 | 7.65 | 9.04 | 10.41 | 11.80 | 13.18 |
| 14.61 | 0.19 | 1.29 | 2.43 | 3.61 | 4.89 | 6.27 | 7.78 | 9.16 | 10.63 | 12.02 | 13.42 |
| 14.75 | 0.40 | 1.49 | 2.64 | 3.82 | 5.16 | 6.49 | 7.92 | 9.29 | 10.71 | 12.17 | 13.60 |
| 14.89 | 0.35 | 1.43 | 2.49 | 3.70 | 5.07 | 6.44 | 7.86 | 9.26 | 10.72 | 12.05 | 13.47 |
| 15.05 | 0.52 | 1.65 | 2.76 | 4.09 | 5.35 | 6.74 | 8.16 | 9.47 | 10.99 | 12.51 | 13.91 |
| 15.21 | 0.48 | 1.46 | 2.66 | 3.91 | 5.16 | 6.55 | 7.96 | 9.37 | 10.84 | 12.24 | 13.62 |
| 15.39 | 0.47 | 1.44 | 2.51 | 3.85 | 5.04 | 6.38 | 7.78 | 9.20 | 10.60 | 12.00 | 13.44 |
| 15.59 | 0.32 | 1.40 | 2.60 | 3.85 | 5.02 | 6.32 | 7.74 | 9.18 | 10.62 | 12.08 | 13.50 |
| 15.8  | 0.33 | 1.36 | 2.45 | 3.67 | 4.90 | 6.21 | 7.61 | 8.95 | 10.43 | 11.83 | 13.13 |
| 16.02 | 0.60 | 1.55 | 2.67 | 4.00 | 5.22 | 6.57 | 7.86 | 9.29 | 10.76 | 12.10 | 13.49 |
| 16.27 | 0.67 | 1.78 | 2.96 | 4.13 | 5.44 | 6.78 | 8.29 | 9.62 | 11.15 | 12.60 | 13.98 |
| 16.53 | 0.68 | 1.79 | 2.79 | 3.97 | 5.29 | 6.68 | 8.05 | 9.44 | 10.98 | 12.37 | 13.76 |
| 16.81 | 0.47 | 1.46 | 2.66 | 3.89 | 5.15 | 6.46 | 7.88 | 9.33 | 10.77 | 12.17 | 13.59 |
| 17.12 | 0.46 | 1.44 | 2.56 | 3.81 | 5.03 | 6.43 | 7.84 | 9.25 | 10.76 | 11.97 | 13.43 |
| 17.45 | 0.34 | 1.48 | 2.68 | 3.85 | 5.28 | 6.62 | 7.89 | 9.37 | 10.79 | 12.29 | 13.74 |
| 17.81 | 0.67 | 1.68 | 2.88 | 4.11 | 5.37 | 6.75 | 8.07 | 9.58 | 10.95 | 12.42 | 13.81 |
| 18.19 | 0.62 | 1.74 | 2.78 | 4.13 | 5.43 | 6.74 | 8.17 | 9.58 | 11.05 | 12.45 | 13.88 |
| 18.6  | 0.56 | 1.62 | 2.73 | 3.95 | 5.20 | 6.52 | 7.94 | 9.24 | 10.74 | 12.10 | 13.56 |
| 19.05 | 0.18 | 1.19 | 2.41 | 3.64 | 4.84 | 6.27 | 7.62 | 9.06 | 10.51 | 12.01 | 13.38 |
| 19.53 | 0.77 | 1.73 | 2.91 | 4.15 | 5.48 | 6.78 | 8.33 | 9.63 | 11.07 | 12.47 | 13.93 |
| 20.05 | 0.44 | 1.52 | 2.66 | 3.84 | 5.17 | 6.50 | 7.81 | 9.23 | 10.56 | 12.05 | 13.46 |
| 20.61 | 0.48 | 1.60 | 2.81 | 4.00 | 5.31 | 6.65 | 8.02 | 9.54 | 10.89 | 12.45 | 13.84 |
| 21.22 | 0.34 | 1.37 | 2.53 | 3.75 | 5.11 | 6.36 | 7.79 | 9.21 | 10.66 | 12.05 | 13.50 |
| 21.87 | 0.57 | 1.67 | 2.82 | 4.05 | 5.26 | 6.52 | 7.97 | 9.40 | 10.88 | 12.25 | 13.64 |
| 22.57 | 0.43 | 1.55 | 2.58 | 3.80 | 5.14 | 6.55 | 7.90 | 9.36 | 10.80 | 12.20 | 13.67 |
| 23.33 | 0.77 | 1.86 | 2.94 | 4.18 | 5.46 | 6.72 | 8.18 | 9.49 | 10.90 | 12.39 | 13.73 |
| 24.15 | 0.87 | 1.93 | 3.07 | 4.39 | 5.62 | 6.95 | 8.37 | 9.69 | 11.20 | 12.64 | 13.98 |
| 25.03 | 0.92 | 1.92 | 3.05 | 4.31 | 5.59 | 6.87 | 8.37 | 9.74 | 11.17 | 12.61 | 14.04 |
| 25.98 | 0.14 | 1.09 | 2.21 | 3.39 | 4.73 | 6.17 | 7.59 | 9.00 | 10.43 | 11.79 | 13.28 |
| 27.01 | 0.09 | 1.13 | 2.28 | 3.51 | 4.86 | 6.13 | 7.54 | 9.00 | 10.33 | 11.78 | 13.27 |
| 28.11 | 0.70 | 1.69 | 2.87 | 4.16 | 5.34 | 6.58 | 8.19 | 9.47 | 10.83 | 12.29 | 13.69 |
| 29.3  | 0.46 | 1.43 | 2.64 | 3.88 | 5.23 | 6.57 | 8.00 | 9.48 | 10.92 | 12.38 | 13.77 |
| 30.59 | 0.65 | 1.75 | 2.83 | 3.97 | 5.33 | 6.66 | 7.91 | 9.33 | 10.84 | 12.23 | 13.58 |
| 31.98 | 0.69 | 1.71 | 2.92 | 4.11 | 5.35 | 6.81 | 8.20 | 9.58 | 11.03 | 12.51 | 13.92 |
| 33.47 | 0.76 | 1.80 | 2.97 | 4.21 | 5.57 | 6.84 | 8.38 | 9.69 | 11.11 | 12.50 | 14.01 |
| 35.09 | 0.75 | 1.90 | 2.92 | 4.19 | 5.50 | 6.90 | 8.27 | 9.77 | 11.16 | 12.68 | 14.08 |



|        |      |      |       |       |       |       |       |       |       |       |       |
|--------|------|------|-------|-------|-------|-------|-------|-------|-------|-------|-------|
| 36.83  | 0.85 | 1.97 | 3.11  | 4.37  | 5.60  | 7.02  | 8.45  | 9.85  | 11.35 | 12.79 | 14.21 |
| 38.71  | 0.85 | 1.95 | 3.18  | 4.37  | 5.68  | 7.03  | 8.52  | 9.95  | 11.41 | 12.83 | 14.24 |
| 40.73  | 0.77 | 1.91 | 3.05  | 4.34  | 5.67  | 7.03  | 8.46  | 9.84  | 11.39 | 12.91 | 14.22 |
| 42.92  | 1.18 | 2.21 | 3.26  | 4.69  | 6.01  | 7.38  | 8.90  | 10.38 | 11.91 | 13.40 | 14.97 |
| 45.27  | 0.61 | 1.71 | 2.95  | 4.18  | 5.55  | 6.90  | 8.24  | 9.69  | 11.12 | 12.68 | 14.08 |
| 47.81  | 0.43 | 1.50 | 2.82  | 4.06  | 5.33  | 6.81  | 8.22  | 9.71  | 11.28 | 12.62 | 14.12 |
| 50.55  | 0.97 | 2.08 | 3.27  | 4.36  | 5.65  | 7.14  | 8.61  | 9.98  | 11.47 | 12.97 | 14.32 |
| 53.51  | 0.86 | 1.89 | 3.09  | 4.44  | 5.73  | 7.07  | 8.57  | 9.98  | 11.42 | 12.86 | 14.28 |
| 56.69  | 1.15 | 2.25 | 3.49  | 4.84  | 6.10  | 7.50  | 9.02  | 10.49 | 11.98 | 13.50 | 14.99 |
| 60.13  | 1.06 | 2.09 | 3.36  | 4.58  | 5.90  | 7.23  | 8.71  | 10.18 | 11.68 | 13.10 | 14.54 |
| 63.84  | 0.94 | 2.12 | 3.37  | 4.56  | 5.97  | 7.39  | 8.77  | 10.21 | 11.78 | 13.23 | 14.80 |
| 67.83  | 0.86 | 1.92 | 3.19  | 4.48  | 5.81  | 7.26  | 8.73  | 10.24 | 11.73 | 13.27 | 14.82 |
| 72.15  | 1.07 | 2.19 | 3.46  | 4.72  | 6.02  | 7.46  | 8.82  | 10.30 | 11.84 | 13.32 | 14.79 |
| 76.8   | 1.20 | 2.29 | 3.36  | 4.72  | 6.10  | 7.49  | 8.92  | 10.34 | 11.87 | 13.33 | 14.81 |
| 81.81  | 1.43 | 2.61 | 3.83  | 5.10  | 6.45  | 7.81  | 9.31  | 10.80 | 12.26 | 13.86 | 15.38 |
| 87.22  | 1.44 | 2.57 | 3.76  | 5.05  | 6.31  | 7.69  | 9.32  | 10.79 | 12.26 | 13.84 | 15.28 |
| 93.06  | 1.60 | 2.86 | 4.02  | 5.28  | 6.70  | 8.14  | 9.69  | 11.19 | 12.72 | 14.31 | 15.78 |
| 99.35  | 1.82 | 2.99 | 4.17  | 5.62  | 6.90  | 8.36  | 9.98  | 11.39 | 12.99 | 14.57 | 16.15 |
| 106.13 | 1.83 | 3.01 | 4.25  | 5.56  | 6.83  | 8.34  | 9.81  | 11.36 | 12.81 | 14.39 | 15.80 |
| 113.45 | 2.02 | 3.09 | 4.36  | 5.68  | 7.11  | 8.52  | 10.06 | 11.64 | 13.11 | 14.65 | 16.22 |
| 121.34 | 1.72 | 2.82 | 4.14  | 5.34  | 6.70  | 8.13  | 9.69  | 11.23 | 12.69 | 14.25 | 15.78 |
| 129.86 | 1.73 | 2.83 | 4.10  | 5.45  | 6.90  | 8.31  | 9.82  | 11.33 | 12.95 | 14.53 | 16.08 |
| 139.04 | 2.57 | 3.85 | 5.07  | 6.48  | 7.85  | 9.33  | 10.84 | 12.38 | 13.96 | 15.52 | 17.13 |
| 148.94 | 2.51 | 3.78 | 5.07  | 6.46  | 7.90  | 9.38  | 10.84 | 12.43 | 14.05 | 15.69 | 17.16 |
| 159.62 | 2.66 | 3.78 | 5.10  | 6.54  | 7.89  | 9.29  | 10.82 | 12.45 | 13.91 | 15.55 | 17.14 |
| 171.14 | 2.77 | 3.83 | 5.14  | 6.62  | 7.95  | 9.47  | 10.98 | 12.45 | 14.10 | 15.67 | 17.19 |
| 183.56 | 2.55 | 3.73 | 4.95  | 6.43  | 7.81  | 9.26  | 10.74 | 12.30 | 13.92 | 15.46 | 17.05 |
| 196.96 | 2.88 | 4.03 | 5.40  | 6.83  | 8.24  | 9.80  | 11.34 | 12.94 | 14.55 | 16.20 | 17.76 |
| 211.41 | 3.17 | 4.47 | 5.79  | 7.27  | 8.61  | 10.24 | 11.79 | 13.39 | 15.01 | 16.62 | 18.28 |
| 226.99 | 3.49 | 4.74 | 6.22  | 7.65  | 9.07  | 10.65 | 12.23 | 13.85 | 15.57 | 17.19 | 18.75 |
| 243.8  | 3.41 | 4.67 | 6.00  | 7.46  | 8.93  | 10.46 | 12.06 | 13.65 | 15.25 | 16.83 | 18.39 |
| 261.93 | 3.81 | 5.05 | 6.35  | 7.78  | 9.23  | 10.85 | 12.39 | 14.08 | 15.77 | 17.46 | 19.04 |
| 281.48 | 4.11 | 5.35 | 6.70  | 8.17  | 9.57  | 11.22 | 12.86 | 14.45 | 16.07 | 17.71 | 19.42 |
| 302.56 | 4.34 | 5.72 | 6.95  | 8.46  | 10.00 | 11.50 | 13.17 | 14.88 | 16.55 | 18.14 | 19.83 |
| 325.3  | 4.37 | 5.68 | 7.08  | 8.56  | 10.09 | 11.63 | 13.29 | 14.94 | 16.63 | 18.21 | 19.90 |
| 349.83 | 4.49 | 5.67 | 6.93  | 8.47  | 9.99  | 11.50 | 13.17 | 14.70 | 16.32 | 17.97 | 19.58 |
| 376.28 | 4.94 | 6.05 | 7.49  | 9.08  | 10.56 | 12.12 | 13.82 | 15.54 | 17.18 | 18.85 | 20.49 |
| 404.81 | 5.05 | 6.34 | 7.69  | 9.26  | 10.75 | 12.28 | 14.05 | 15.61 | 17.31 | 18.95 | 20.56 |
| 435.58 | 5.18 | 6.42 | 7.76  | 9.43  | 10.90 | 12.56 | 14.23 | 15.84 | 17.59 | 19.29 | 20.94 |
| 468.76 | 5.71 | 7.01 | 8.44  | 10.01 | 11.53 | 13.22 | 14.91 | 16.66 | 18.23 | 19.95 | 21.70 |
| 504.55 | 5.70 | 7.15 | 8.61  | 10.21 | 11.74 | 13.35 | 15.11 | 16.67 | 18.38 | 20.09 | 21.77 |
| 543.15 | 5.92 | 7.32 | 8.74  | 10.27 | 11.86 | 13.46 | 15.11 | 16.84 | 18.62 | 20.26 | 21.97 |
| 584.78 | 6.40 | 7.70 | 9.08  | 10.67 | 12.26 | 13.84 | 15.61 | 17.26 | 18.97 | 20.70 | 22.47 |
| 629.68 | 6.51 | 7.83 | 9.30  | 10.85 | 12.42 | 14.09 | 15.79 | 17.54 | 19.23 | 20.95 | 22.71 |
| 678.1  | 6.90 | 8.36 | 9.65  | 11.26 | 12.84 | 14.44 | 16.28 | 17.85 | 19.60 | 21.33 | 23.05 |
| 730.33 | 6.88 | 8.24 | 9.68  | 11.30 | 12.87 | 14.47 | 16.21 | 17.88 | 19.63 | 21.38 | 23.06 |
| 786.65 | 6.77 | 8.13 | 9.74  | 11.19 | 12.74 | 14.46 | 16.08 | 17.91 | 19.48 | 21.29 | 22.93 |
| 847.4  | 7.13 | 8.57 | 10.07 | 11.64 | 13.30 | 14.91 | 16.65 | 18.41 | 20.17 | 21.97 | 23.63 |
| 912.92 | 7.10 | 8.54 | 9.98  | 11.58 | 13.19 | 14.88 | 16.51 | 18.26 | 19.97 | 21.63 | 23.41 |
| 983.58 | 7.30 | 8.60 | 10.07 | 11.65 | 13.19 | 14.86 | 16.59 | 18.30 | 20.01 | 21.73 | 23.33 |

|         |      |      |       |       |       |       |       |       |       |       |       |
|---------|------|------|-------|-------|-------|-------|-------|-------|-------|-------|-------|
| 1059.78 | 7.39 | 8.74 | 10.28 | 11.84 | 13.39 | 15.05 | 16.79 | 18.48 | 20.16 | 21.89 | 23.61 |
| 1141.98 | 7.56 | 8.94 | 10.32 | 11.90 | 13.39 | 15.11 | 16.78 | 18.38 | 20.11 | 21.84 | 23.43 |
| 1230.62 | 7.54 | 8.91 | 10.44 | 11.90 | 13.61 | 15.22 | 16.90 | 18.57 | 20.39 | 22.06 | 23.74 |
| 1326.23 | 7.70 | 9.18 | 10.66 | 12.29 | 13.89 | 15.52 | 17.27 | 19.02 | 20.81 | 22.57 | 24.25 |
| 1429.34 | 7.87 | 9.24 | 10.79 | 12.40 | 14.05 | 15.67 | 17.44 | 19.12 | 20.98 | 22.65 | 24.33 |
| 1540.54 | 7.63 | 9.01 | 10.50 | 12.16 | 13.68 | 15.41 | 17.17 | 18.80 | 20.62 | 22.32 | 24.04 |
| 1660.48 | 7.88 | 9.25 | 10.81 | 12.40 | 14.03 | 15.72 | 17.39 | 19.06 | 20.94 | 22.74 | 24.40 |
| 1789.83 | 7.66 | 9.11 | 10.58 | 12.25 | 13.85 | 15.63 | 17.25 | 19.05 | 20.79 | 22.60 | 24.32 |
| 1929.34 | 8.13 | 9.54 | 11.04 | 12.68 | 14.37 | 16.10 | 17.83 | 19.60 | 21.33 | 23.19 | 24.88 |
| 2079.8  | 7.43 | 8.77 | 10.26 | 11.83 | 13.43 | 15.15 | 16.83 | 18.66 | 20.34 | 22.06 | 23.82 |
| 2242.08 | 7.89 | 9.43 | 10.95 | 12.51 | 14.11 | 15.91 | 17.65 | 19.36 | 21.18 | 22.97 | 24.76 |
| 2417.1  | 7.81 | 9.27 | 10.72 | 12.24 | 14.00 | 15.67 | 17.36 | 19.21 | 20.90 | 22.71 | 24.39 |
| 2605.85 | 7.59 | 9.04 | 10.57 | 12.20 | 13.88 | 15.52 | 17.16 | 18.90 | 20.74 | 22.41 | 24.05 |
| 2809.43 | 7.80 | 9.05 | 10.56 | 12.19 | 13.85 | 15.45 | 17.23 | 18.93 | 20.72 | 22.43 | 24.21 |
| 3028.99 | 7.68 | 8.99 | 10.39 | 11.96 | 13.54 | 15.27 | 16.81 | 18.50 | 20.28 | 21.89 | 23.62 |
| 3265.79 | 7.64 | 8.90 | 10.48 | 11.97 | 13.59 | 15.27 | 17.03 | 18.59 | 20.40 | 22.11 | 23.73 |
| 3521.18 | 7.22 | 8.80 | 10.19 | 11.83 | 13.38 | 14.89 | 16.66 | 18.34 | 20.12 | 21.86 | 23.58 |
| 3796.62 | 7.75 | 9.11 | 10.52 | 12.18 | 13.79 | 15.47 | 17.20 | 18.83 | 20.59 | 22.33 | 23.99 |

| Wavelength (nm) \ Time (ps) | 553.11 | 554.52 | 555.93 | 557.34 | 558.75 | 560.16 | 561.57 | 562.97 | 564.38 | 565.79 | 567.20 |
|-----------------------------|--------|--------|--------|--------|--------|--------|--------|--------|--------|--------|--------|
| -3.28                       | 0.22   | 0.22   | 0.22   | 0.21   | 0.19   | 0.18   | 0.21   | 0.13   | 0.18   | 0.12   | 0.15   |
| -2.78                       | -0.01  | 0.05   | 0.12   | 0.09   | 0.04   | 0.05   | 0.10   | 0.07   | 0.04   | 0.08   | 0.03   |
| -2.28                       | 0.22   | 0.24   | 0.21   | 0.19   | 0.16   | 0.17   | 0.22   | 0.19   | 0.17   | 0.15   | 0.20   |
| -1.78                       | 0.05   | 0.03   | 0.02   | 0.07   | 0.05   | 0.08   | 0.02   | 0.07   | 0.14   | 0.12   | 0.13   |
| -1.28                       | -0.12  | -0.17  | -0.12  | -0.11  | -0.07  | -0.12  | -0.07  | -0.10  | -0.11  | -0.11  | -0.09  |
| -0.78                       | 0.01   | 0.05   | 0.01   | 0.02   | 0.05   | 0.03   | -0.02  | 0.01   | 0.04   | -0.03  | -0.04  |
| -0.28                       | -0.59  | -0.69  | -0.69  | -0.69  | -0.64  | -0.56  | -0.63  | -0.59  | -0.60  | -0.55  | -0.56  |
| 0.22                        | 0.22   | 0.27   | 0.23   | 0.21   | 0.21   | 0.16   | 0.18   | 0.24   | 0.14   | 0.23   | 0.16   |
| 0.32                        | 0.22   | 0.26   | 0.23   | 0.24   | 0.22   | 0.17   | 0.28   | 0.27   | 0.29   | 0.27   | 0.37   |
| 0.42                        | -0.06  | -0.04  | -0.06  | -0.11  | -0.01  | -0.05  | -0.05  | 0.00   | 0.01   | -0.01  | 0.04   |
| 0.52                        | -0.15  | -0.16  | -0.17  | -0.16  | -0.21  | -0.20  | -0.17  | -0.22  | -0.17  | -0.16  | -0.27  |
| 0.62                        | 0.11   | 0.11   | 0.12   | 0.03   | 0.10   | 0.05   | 0.09   | 0.04   | 0.03   | 0.09   | 0.05   |
| 0.72                        | -0.18  | -0.18  | -0.22  | -0.20  | -0.23  | -0.21  | -0.19  | -0.18  | -0.16  | -0.22  | -0.18  |
| 0.77                        | 0.18   | 0.23   | 0.11   | 0.09   | 0.19   | 0.21   | 0.11   | 0.23   | 0.23   | 0.19   | 0.13   |
| 0.82                        | -0.01  | 0.07   | -0.01  | 0.08   | -0.03  | 0.01   | 0.03   | -0.02  | 0.02   | 0.03   | 0.00   |
| 0.87                        | -0.13  | -0.15  | -0.19  | -0.18  | -0.14  | -0.24  | -0.15  | -0.20  | -0.20  | -0.21  | -0.23  |
| 0.92                        | -0.09  | -0.09  | -0.08  | -0.12  | -0.07  | -0.15  | -0.11  | -0.09  | -0.14  | -0.05  | -0.09  |
| 0.97                        | 0.06   | 0.08   | 0.15   | 0.09   | 0.14   | 0.19   | 0.05   | 0.11   | 0.14   | 0.10   | 0.12   |
| 1.02                        | 0.30   | 0.22   | 0.25   | 0.29   | 0.26   | 0.22   | 0.22   | 0.22   | 0.21   | 0.23   | 0.28   |
| 1.07                        | -0.04  | -0.03  | 0.02   | -0.04  | -0.03  | -0.04  | -0.02  | -0.02  | -0.03  | 0.00   | 0.03   |
| 1.12                        | -0.19  | -0.18  | -0.18  | -0.13  | -0.11  | -0.11  | -0.14  | -0.12  | -0.12  | -0.14  | -0.13  |
| 1.17                        | -0.02  | -0.01  | -0.07  | 0.02   | -0.04  | 0.01   | -0.03  | -0.01  | -0.02  | -0.02  | 0.03   |
| 1.22                        | 0.38   | 0.33   | 0.34   | 0.34   | 0.35   | 0.38   | 0.32   | 0.30   | 0.34   | 0.36   | 0.40   |
| 1.27                        | 0.12   | 0.11   | 0.05   | 0.13   | 0.09   | 0.14   | 0.17   | 0.14   | 0.15   | 0.14   | 0.17   |
| 1.32                        | -0.14  | -0.08  | -0.19  | -0.04  | -0.16  | -0.08  | -0.09  | -0.07  | -0.12  | -0.14  | -0.09  |
| 1.37                        | 0.01   | -0.03  | -0.12  | -0.10  | -0.05  | -0.08  | -0.05  | -0.05  | 0.03   | 0.01   | 0.01   |
| 1.42                        | -0.27  | -0.26  | -0.20  | -0.19  | -0.15  | -0.19  | -0.10  | -0.09  | -0.04  | 0.00   | -0.06  |

|      |       |       |       |       |       |       |       |       |       |       |       |
|------|-------|-------|-------|-------|-------|-------|-------|-------|-------|-------|-------|
| 1.47 | 1.37  | 1.33  | 1.30  | 1.17  | 1.22  | 1.10  | 0.95  | 0.88  | 0.75  | 0.64  | 0.57  |
| 1.52 | 4.01  | 4.27  | 4.33  | 4.53  | 4.53  | 4.64  | 4.67  | 4.66  | 4.60  | 4.47  | 4.34  |
| 1.57 | 4.71  | 5.55  | 6.29  | 6.97  | 7.51  | 8.11  | 8.59  | 9.02  | 9.37  | 9.60  | 9.79  |
| 1.62 | 3.62  | 4.98  | 6.27  | 7.44  | 8.49  | 9.55  | 10.48 | 11.38 | 12.22 | 12.88 | 13.51 |
| 1.67 | 1.29  | 2.68  | 3.99  | 5.38  | 6.54  | 7.78  | 8.89  | 9.89  | 10.93 | 11.89 | 12.75 |
| 1.72 | 1.01  | 2.14  | 3.35  | 4.45  | 5.51  | 6.57  | 7.55  | 8.52  | 9.42  | 10.21 | 10.98 |
| 1.77 | 1.06  | 2.18  | 3.27  | 4.26  | 5.21  | 6.19  | 7.05  | 7.89  | 8.66  | 9.37  | 10.04 |
| 1.82 | 0.89  | 1.97  | 3.03  | 4.00  | 4.92  | 5.75  | 6.59  | 7.33  | 8.05  | 8.75  | 9.30  |
| 1.87 | 1.32  | 2.45  | 3.35  | 4.25  | 5.06  | 5.95  | 6.63  | 7.33  | 8.01  | 8.65  | 9.11  |
| 1.92 | 2.68  | 3.62  | 4.59  | 5.50  | 6.31  | 7.02  | 7.72  | 8.43  | 9.09  | 9.58  | 10.16 |
| 1.97 | 3.44  | 4.44  | 5.39  | 6.24  | 7.06  | 7.79  | 8.47  | 9.14  | 9.67  | 10.21 | 10.55 |
| 2.02 | 4.89  | 5.72  | 6.66  | 7.56  | 8.31  | 9.05  | 9.69  | 10.32 | 10.82 | 11.34 | 11.69 |
| 2.07 | 5.76  | 6.80  | 7.68  | 8.53  | 9.35  | 10.00 | 10.78 | 11.35 | 11.87 | 12.33 | 12.75 |
| 2.12 | 5.54  | 6.54  | 7.38  | 8.18  | 8.97  | 9.71  | 10.37 | 10.92 | 11.43 | 11.84 | 12.25 |
| 2.17 | 6.04  | 7.04  | 7.97  | 8.77  | 9.52  | 10.28 | 10.94 | 11.45 | 12.00 | 12.45 | 12.82 |
| 2.22 | 6.59  | 7.49  | 8.41  | 9.33  | 10.07 | 10.84 | 11.42 | 12.09 | 12.59 | 12.99 | 13.36 |
| 2.27 | 7.54  | 8.51  | 9.41  | 10.28 | 11.04 | 11.80 | 12.41 | 13.01 | 13.48 | 13.87 | 14.25 |
| 2.32 | 8.22  | 9.23  | 10.20 | 11.09 | 11.82 | 12.65 | 13.21 | 13.82 | 14.27 | 14.69 | 15.01 |
| 2.37 | 8.35  | 9.33  | 10.30 | 11.17 | 11.94 | 12.68 | 13.33 | 13.91 | 14.39 | 14.83 | 15.07 |
| 2.42 | 8.53  | 9.54  | 10.42 | 11.34 | 12.04 | 12.86 | 13.55 | 14.09 | 14.65 | 15.00 | 15.34 |
| 2.47 | 8.77  | 9.82  | 10.75 | 11.63 | 12.46 | 13.24 | 13.86 | 14.51 | 15.04 | 15.45 | 15.73 |
| 2.52 | 8.83  | 9.93  | 10.88 | 11.75 | 12.55 | 13.25 | 13.95 | 14.59 | 15.04 | 15.41 | 15.72 |
| 2.57 | 9.43  | 10.41 | 11.45 | 12.33 | 13.14 | 13.91 | 14.61 | 15.15 | 15.65 | 16.13 | 16.49 |
| 2.62 | 9.78  | 10.74 | 11.80 | 12.65 | 13.42 | 14.31 | 14.98 | 15.56 | 16.07 | 16.42 | 16.90 |
| 2.67 | 9.76  | 10.81 | 11.72 | 12.65 | 13.45 | 14.15 | 14.94 | 15.51 | 15.98 | 16.38 | 16.71 |
| 2.72 | 9.84  | 10.82 | 11.76 | 12.68 | 13.58 | 14.28 | 14.97 | 15.51 | 16.03 | 16.43 | 16.66 |
| 2.77 | 9.91  | 10.93 | 11.94 | 12.84 | 13.65 | 14.52 | 15.16 | 15.76 | 16.31 | 16.78 | 16.98 |
| 2.82 | 10.83 | 11.92 | 12.94 | 13.80 | 14.64 | 15.47 | 16.20 | 16.72 | 17.26 | 17.68 | 17.93 |
| 2.87 | 10.56 | 11.66 | 12.69 | 13.59 | 14.41 | 15.15 | 15.86 | 16.43 | 16.93 | 17.39 | 17.78 |
| 2.92 | 11.30 | 12.45 | 13.47 | 14.37 | 15.15 | 15.97 | 16.64 | 17.27 | 17.77 | 18.18 | 18.49 |
| 2.97 | 11.05 | 12.15 | 13.25 | 14.13 | 15.11 | 15.78 | 16.53 | 17.11 | 17.73 | 18.12 | 18.39 |
| 3.02 | 10.95 | 12.01 | 13.08 | 14.00 | 14.98 | 15.70 | 16.38 | 16.89 | 17.52 | 17.92 | 18.25 |
| 3.07 | 11.21 | 12.30 | 13.25 | 14.23 | 15.08 | 15.85 | 16.59 | 17.19 | 17.71 | 18.06 | 18.45 |
| 3.12 | 12.22 | 13.35 | 14.44 | 15.41 | 16.30 | 17.18 | 17.83 | 18.44 | 19.06 | 19.40 | 19.78 |
| 3.17 | 11.77 | 12.98 | 13.94 | 14.99 | 15.71 | 16.58 | 17.27 | 17.93 | 18.52 | 18.84 | 19.17 |
| 3.22 | 11.72 | 12.85 | 13.90 | 14.83 | 15.75 | 16.54 | 17.24 | 17.88 | 18.47 | 18.82 | 19.15 |
| 3.27 | 11.54 | 12.70 | 13.64 | 14.67 | 15.55 | 16.31 | 17.01 | 17.69 | 18.24 | 18.70 | 18.99 |
| 3.32 | 12.37 | 13.52 | 14.61 | 15.57 | 16.43 | 17.31 | 18.05 | 18.75 | 19.21 | 19.73 | 20.05 |
| 3.37 | 12.34 | 13.43 | 14.44 | 15.41 | 16.32 | 17.17 | 17.85 | 18.46 | 19.01 | 19.41 | 19.78 |
| 3.42 | 12.13 | 13.31 | 14.42 | 15.28 | 16.21 | 17.03 | 17.75 | 18.39 | 18.92 | 19.33 | 19.70 |
| 3.47 | 12.63 | 13.75 | 14.78 | 15.70 | 16.69 | 17.37 | 18.15 | 18.77 | 19.31 | 19.77 | 20.17 |
| 3.52 | 12.36 | 13.48 | 14.62 | 15.65 | 16.55 | 17.34 | 18.14 | 18.80 | 19.39 | 19.80 | 20.17 |
| 3.57 | 12.27 | 13.42 | 14.54 | 15.53 | 16.40 | 17.20 | 17.93 | 18.58 | 19.09 | 19.62 | 19.97 |
| 3.62 | 12.68 | 13.75 | 14.85 | 15.85 | 16.74 | 17.60 | 18.35 | 19.03 | 19.61 | 20.12 | 20.41 |
| 3.67 | 12.72 | 13.86 | 14.99 | 15.95 | 16.95 | 17.73 | 18.42 | 19.12 | 19.72 | 20.19 | 20.50 |
| 3.72 | 13.59 | 14.69 | 15.92 | 16.76 | 17.69 | 18.50 | 19.26 | 20.03 | 20.57 | 21.10 | 21.36 |
| 3.92 | 12.85 | 13.99 | 15.11 | 15.97 | 16.91 | 17.79 | 18.43 | 19.08 | 19.68 | 20.11 | 20.55 |
| 4.12 | 13.33 | 14.44 | 15.55 | 16.56 | 17.55 | 18.39 | 19.18 | 19.88 | 20.46 | 20.99 | 21.33 |
| 4.32 | 13.51 | 14.72 | 15.83 | 16.93 | 17.89 | 18.87 | 19.61 | 20.39 | 20.88 | 21.41 | 21.79 |
| 4.52 | 14.21 | 15.35 | 16.50 | 17.59 | 18.52 | 19.45 | 20.18 | 20.90 | 21.54 | 22.06 | 22.42 |

|       |       |       |       |       |       |       |       |       |       |       |       |
|-------|-------|-------|-------|-------|-------|-------|-------|-------|-------|-------|-------|
| 4.72  | 14.25 | 15.34 | 16.51 | 17.55 | 18.55 | 19.41 | 20.25 | 20.89 | 21.51 | 22.15 | 22.52 |
| 4.92  | 14.05 | 15.25 | 16.42 | 17.44 | 18.40 | 19.38 | 20.12 | 20.91 | 21.44 | 21.98 | 22.38 |
| 5.12  | 14.15 | 15.32 | 16.46 | 17.54 | 18.59 | 19.58 | 20.35 | 21.12 | 21.74 | 22.27 | 22.69 |
| 5.32  | 14.28 | 15.50 | 16.70 | 17.83 | 18.83 | 19.80 | 20.66 | 21.39 | 22.10 | 22.59 | 22.92 |
| 5.52  | 14.23 | 15.41 | 16.58 | 17.66 | 18.66 | 19.60 | 20.49 | 21.17 | 21.82 | 22.34 | 22.79 |
| 5.72  | 14.27 | 15.50 | 16.72 | 17.81 | 18.83 | 19.73 | 20.57 | 21.31 | 21.98 | 22.46 | 22.89 |
| 5.92  | 14.66 | 15.85 | 17.08 | 18.15 | 19.14 | 20.07 | 20.88 | 21.63 | 22.34 | 22.86 | 23.30 |
| 6.12  | 14.26 | 15.56 | 16.71 | 17.78 | 18.79 | 19.67 | 20.56 | 21.35 | 21.93 | 22.50 | 22.89 |
| 6.32  | 14.24 | 15.38 | 16.59 | 17.68 | 18.70 | 19.70 | 20.43 | 21.22 | 21.87 | 22.38 | 22.81 |
| 6.52  | 14.59 | 15.75 | 17.01 | 18.16 | 19.13 | 20.19 | 20.92 | 21.69 | 22.43 | 22.99 | 23.37 |
| 6.72  | 14.57 | 15.84 | 17.15 | 18.23 | 19.20 | 20.15 | 21.01 | 21.73 | 22.44 | 22.94 | 23.34 |
| 6.92  | 14.38 | 15.58 | 16.80 | 17.95 | 18.90 | 19.79 | 20.65 | 21.42 | 22.09 | 22.63 | 23.06 |
| 7.12  | 14.70 | 15.98 | 17.17 | 18.26 | 19.21 | 20.14 | 20.97 | 21.73 | 22.37 | 22.91 | 23.36 |
| 7.32  | 14.85 | 15.99 | 17.27 | 18.35 | 19.34 | 20.30 | 21.18 | 21.96 | 22.63 | 23.20 | 23.57 |
| 7.52  | 14.57 | 15.71 | 16.96 | 18.12 | 19.12 | 20.06 | 20.94 | 21.71 | 22.40 | 22.89 | 23.39 |
| 7.72  | 14.30 | 15.48 | 16.70 | 17.87 | 18.86 | 19.84 | 20.63 | 21.52 | 22.22 | 22.72 | 23.14 |
| 7.92  | 14.82 | 16.10 | 17.31 | 18.51 | 19.50 | 20.44 | 21.39 | 22.08 | 22.80 | 23.35 | 23.67 |
| 8.12  | 14.68 | 15.91 | 17.07 | 18.25 | 19.25 | 20.24 | 21.04 | 21.78 | 22.48 | 22.98 | 23.45 |
| 8.32  | 14.83 | 16.09 | 17.30 | 18.42 | 19.44 | 20.38 | 21.30 | 22.03 | 22.71 | 23.26 | 23.68 |
| 8.52  | 14.58 | 15.94 | 17.12 | 18.27 | 19.30 | 20.27 | 21.14 | 21.92 | 22.59 | 23.10 | 23.63 |
| 8.72  | 14.61 | 15.86 | 17.05 | 18.17 | 19.22 | 20.22 | 21.09 | 21.86 | 22.60 | 23.15 | 23.56 |
| 8.92  | 14.60 | 15.85 | 17.10 | 18.18 | 19.32 | 20.23 | 21.07 | 21.91 | 22.60 | 23.13 | 23.62 |
| 9.12  | 14.82 | 16.10 | 17.32 | 18.49 | 19.52 | 20.45 | 21.39 | 22.20 | 22.89 | 23.42 | 23.89 |
| 9.32  | 14.75 | 15.99 | 17.26 | 18.35 | 19.45 | 20.41 | 21.30 | 22.08 | 22.77 | 23.34 | 23.79 |
| 9.52  | 15.09 | 16.41 | 17.64 | 18.80 | 19.86 | 20.83 | 21.79 | 22.60 | 23.29 | 23.90 | 24.29 |
| 9.72  | 14.91 | 16.22 | 17.46 | 18.63 | 19.75 | 20.69 | 21.59 | 22.42 | 23.10 | 23.69 | 24.10 |
| 9.92  | 14.73 | 15.94 | 17.34 | 18.53 | 19.55 | 20.55 | 21.44 | 22.29 | 22.88 | 23.49 | 23.97 |
| 10.12 | 14.92 | 16.14 | 17.37 | 18.60 | 19.58 | 20.46 | 21.31 | 22.17 | 22.85 | 23.32 | 23.88 |
| 10.32 | 14.77 | 16.01 | 17.26 | 18.38 | 19.46 | 20.36 | 21.25 | 22.03 | 22.67 | 23.30 | 23.76 |
| 10.52 | 14.72 | 16.08 | 17.27 | 18.41 | 19.50 | 20.36 | 21.25 | 22.00 | 22.72 | 23.27 | 23.66 |
| 10.72 | 14.40 | 15.76 | 16.87 | 18.06 | 19.12 | 20.05 | 20.88 | 21.68 | 22.36 | 22.91 | 23.33 |
| 10.92 | 14.67 | 16.00 | 17.26 | 18.34 | 19.46 | 20.46 | 21.36 | 22.15 | 22.88 | 23.46 | 23.89 |
| 11.12 | 14.58 | 15.92 | 17.21 | 18.33 | 19.33 | 20.36 | 21.22 | 22.01 | 22.73 | 23.27 | 23.74 |
| 11.32 | 14.73 | 16.05 | 17.23 | 18.43 | 19.41 | 20.46 | 21.29 | 22.08 | 22.79 | 23.38 | 23.77 |
| 11.52 | 14.93 | 16.15 | 17.41 | 18.52 | 19.57 | 20.53 | 21.32 | 22.21 | 22.83 | 23.38 | 23.83 |
| 11.72 | 14.58 | 15.86 | 17.11 | 18.16 | 19.19 | 20.17 | 21.05 | 21.78 | 22.50 | 23.07 | 23.63 |
| 11.92 | 14.61 | 15.71 | 16.75 | 17.94 | 18.95 | 19.86 | 20.81 | 21.46 | 22.24 | 22.73 | 23.16 |
| 12.12 | 14.56 | 15.89 | 17.05 | 18.12 | 19.22 | 20.18 | 20.99 | 21.81 | 22.45 | 22.95 | 23.40 |
| 12.32 | 14.83 | 16.09 | 17.30 | 18.46 | 19.47 | 20.49 | 21.33 | 22.11 | 22.76 | 23.35 | 23.69 |
| 12.52 | 15.25 | 16.59 | 17.83 | 18.99 | 20.02 | 21.02 | 21.97 | 22.71 | 23.41 | 24.08 | 24.45 |
| 12.72 | 14.85 | 16.18 | 17.42 | 18.57 | 19.69 | 20.65 | 21.53 | 22.33 | 23.07 | 23.56 | 24.08 |
| 12.92 | 14.72 | 16.08 | 17.35 | 18.43 | 19.52 | 20.49 | 21.36 | 22.14 | 22.89 | 23.44 | 23.86 |
| 13.12 | 14.87 | 16.14 | 17.38 | 18.57 | 19.62 | 20.66 | 21.47 | 22.27 | 22.92 | 23.52 | 24.01 |
| 13.32 | 14.70 | 16.04 | 17.35 | 18.44 | 19.55 | 20.58 | 21.50 | 22.30 | 22.91 | 23.55 | 24.03 |
| 13.52 | 15.00 | 16.28 | 17.45 | 18.71 | 19.79 | 20.77 | 21.63 | 22.36 | 23.19 | 23.72 | 24.26 |
| 13.72 | 15.23 | 16.58 | 17.80 | 18.96 | 19.99 | 20.97 | 21.86 | 22.72 | 23.41 | 23.97 | 24.47 |
| 13.92 | 15.18 | 16.52 | 17.70 | 18.83 | 19.97 | 20.95 | 21.91 | 22.64 | 23.36 | 23.97 | 24.43 |
| 14    | 14.52 | 15.84 | 17.07 | 18.23 | 19.25 | 20.28 | 21.14 | 21.89 | 22.58 | 23.12 | 23.62 |
| 14.08 | 14.62 | 15.90 | 17.11 | 18.27 | 19.34 | 20.35 | 21.23 | 22.01 | 22.71 | 23.30 | 23.70 |
| 14.17 | 14.81 | 16.04 | 17.33 | 18.44 | 19.43 | 20.37 | 21.27 | 22.15 | 22.72 | 23.31 | 23.75 |

|       |       |       |       |       |       |       |       |       |       |       |       |
|-------|-------|-------|-------|-------|-------|-------|-------|-------|-------|-------|-------|
| 14.27 | 14.86 | 16.17 | 17.49 | 18.56 | 19.67 | 20.69 | 21.48 | 22.30 | 23.07 | 23.59 | 24.05 |
| 14.38 | 14.96 | 16.22 | 17.43 | 18.62 | 19.71 | 20.69 | 21.58 | 22.36 | 23.01 | 23.63 | 24.10 |
| 14.49 | 14.53 | 15.74 | 17.03 | 18.17 | 19.17 | 20.19 | 21.04 | 21.88 | 22.51 | 23.13 | 23.56 |
| 14.61 | 14.76 | 16.08 | 17.26 | 18.46 | 19.61 | 20.59 | 21.50 | 22.35 | 22.94 | 23.54 | 24.01 |
| 14.75 | 14.92 | 16.23 | 17.51 | 18.61 | 19.67 | 20.71 | 21.57 | 22.39 | 23.11 | 23.64 | 24.08 |
| 14.89 | 14.81 | 16.14 | 17.47 | 18.57 | 19.69 | 20.64 | 21.49 | 22.27 | 23.03 | 23.66 | 24.04 |
| 15.05 | 15.25 | 16.57 | 17.95 | 19.10 | 20.17 | 21.16 | 22.00 | 22.83 | 23.56 | 24.13 | 24.58 |
| 15.21 | 14.88 | 16.18 | 17.47 | 18.61 | 19.69 | 20.64 | 21.52 | 22.34 | 23.03 | 23.65 | 24.07 |
| 15.39 | 14.74 | 16.07 | 17.21 | 18.33 | 19.50 | 20.46 | 21.31 | 22.13 | 22.81 | 23.42 | 23.85 |
| 15.59 | 14.85 | 16.02 | 17.34 | 18.50 | 19.61 | 20.55 | 21.50 | 22.26 | 22.97 | 23.56 | 24.02 |
| 15.8  | 14.42 | 15.68 | 16.95 | 18.03 | 19.17 | 20.04 | 21.04 | 21.79 | 22.40 | 23.02 | 23.44 |
| 16.02 | 14.77 | 16.13 | 17.32 | 18.41 | 19.49 | 20.41 | 21.29 | 22.12 | 22.79 | 23.32 | 23.82 |
| 16.27 | 15.28 | 16.61 | 17.85 | 19.05 | 20.16 | 21.14 | 21.98 | 22.89 | 23.59 | 24.25 | 24.59 |
| 16.53 | 15.13 | 16.35 | 17.61 | 18.74 | 19.74 | 20.78 | 21.66 | 22.50 | 23.25 | 23.83 | 24.22 |
| 16.81 | 14.98 | 16.18 | 17.51 | 18.70 | 19.78 | 20.78 | 21.68 | 22.47 | 23.17 | 23.75 | 24.16 |
| 17.12 | 14.71 | 16.06 | 17.27 | 18.37 | 19.49 | 20.46 | 21.41 | 22.15 | 22.87 | 23.44 | 23.93 |
| 17.45 | 15.06 | 16.37 | 17.57 | 18.75 | 19.79 | 20.81 | 21.68 | 22.47 | 23.20 | 23.85 | 24.20 |
| 17.81 | 15.22 | 16.49 | 17.73 | 18.93 | 19.95 | 21.00 | 21.90 | 22.74 | 23.41 | 24.02 | 24.42 |
| 18.19 | 15.20 | 16.45 | 17.72 | 18.97 | 19.93 | 20.94 | 21.90 | 22.71 | 23.45 | 24.01 | 24.52 |
| 18.6  | 14.73 | 16.07 | 17.36 | 18.36 | 19.47 | 20.44 | 21.35 | 22.15 | 22.82 | 23.39 | 23.82 |
| 19.05 | 14.78 | 16.12 | 17.37 | 18.56 | 19.68 | 20.69 | 21.54 | 22.37 | 23.06 | 23.70 | 24.18 |
| 19.53 | 15.24 | 16.68 | 17.93 | 19.06 | 20.10 | 21.13 | 22.08 | 22.91 | 23.55 | 24.23 | 24.63 |
| 20.05 | 14.79 | 16.07 | 17.33 | 18.51 | 19.54 | 20.56 | 21.39 | 22.22 | 22.87 | 23.49 | 23.90 |
| 20.61 | 15.14 | 16.44 | 17.73 | 18.88 | 20.04 | 20.98 | 21.87 | 22.71 | 23.42 | 24.02 | 24.51 |
| 21.22 | 14.85 | 16.19 | 17.42 | 18.50 | 19.61 | 20.72 | 21.62 | 22.43 | 23.06 | 23.67 | 24.07 |
| 21.87 | 14.93 | 16.22 | 17.47 | 18.64 | 19.79 | 20.65 | 21.62 | 22.45 | 23.15 | 23.72 | 24.14 |
| 22.57 | 15.04 | 16.41 | 17.68 | 18.85 | 19.98 | 21.01 | 21.86 | 22.66 | 23.38 | 24.08 | 24.49 |
| 23.33 | 15.09 | 16.37 | 17.57 | 18.68 | 19.80 | 20.75 | 21.73 | 22.50 | 23.21 | 23.78 | 24.22 |
| 24.15 | 15.44 | 16.70 | 17.90 | 19.12 | 20.16 | 21.21 | 22.07 | 22.80 | 23.63 | 24.20 | 24.69 |
| 25.03 | 15.42 | 16.69 | 17.96 | 19.10 | 20.27 | 21.21 | 22.19 | 22.98 | 23.63 | 24.22 | 24.74 |
| 25.98 | 14.62 | 15.92 | 17.19 | 18.32 | 19.42 | 20.44 | 21.38 | 22.22 | 22.94 | 23.56 | 23.99 |
| 27.01 | 14.67 | 16.04 | 17.24 | 18.39 | 19.59 | 20.57 | 21.45 | 22.30 | 23.06 | 23.60 | 24.13 |
| 28.11 | 15.06 | 16.30 | 17.58 | 18.79 | 19.83 | 20.83 | 21.76 | 22.50 | 23.29 | 23.83 | 24.34 |
| 29.3  | 15.22 | 16.57 | 17.82 | 19.01 | 20.12 | 21.12 | 22.04 | 22.85 | 23.59 | 24.16 | 24.63 |
| 30.59 | 14.86 | 16.17 | 17.46 | 18.52 | 19.65 | 20.64 | 21.55 | 22.31 | 22.99 | 23.59 | 24.04 |
| 31.98 | 15.25 | 16.61 | 17.86 | 19.06 | 20.12 | 21.19 | 22.12 | 22.89 | 23.60 | 24.22 | 24.73 |
| 33.47 | 15.30 | 16.65 | 17.92 | 19.07 | 20.17 | 21.14 | 22.10 | 22.95 | 23.71 | 24.26 | 24.76 |
| 35.09 | 15.43 | 16.80 | 18.04 | 19.18 | 20.32 | 21.28 | 22.23 | 23.09 | 23.82 | 24.44 | 24.93 |
| 36.83 | 15.57 | 16.91 | 18.15 | 19.37 | 20.46 | 21.53 | 22.49 | 23.30 | 24.08 | 24.68 | 25.15 |
| 38.71 | 15.55 | 16.93 | 18.25 | 19.40 | 20.51 | 21.52 | 22.40 | 23.30 | 24.02 | 24.68 | 25.18 |
| 40.73 | 15.71 | 17.03 | 18.22 | 19.51 | 20.60 | 21.62 | 22.50 | 23.36 | 24.16 | 24.74 | 25.31 |
| 42.92 | 16.29 | 17.70 | 19.07 | 20.19 | 21.30 | 22.47 | 23.39 | 24.31 | 25.08 | 25.77 | 26.26 |
| 45.27 | 15.44 | 16.73 | 18.03 | 19.22 | 20.41 | 21.50 | 22.46 | 23.31 | 24.04 | 24.73 | 25.19 |
| 47.81 | 15.51 | 16.95 | 18.23 | 19.54 | 20.65 | 21.69 | 22.63 | 23.53 | 24.30 | 24.94 | 25.41 |
| 50.55 | 15.71 | 17.04 | 18.35 | 19.55 | 20.66 | 21.75 | 22.60 | 23.54 | 24.19 | 24.89 | 25.35 |
| 53.51 | 15.75 | 17.06 | 18.34 | 19.54 | 20.68 | 21.70 | 22.65 | 23.56 | 24.18 | 24.85 | 25.42 |
| 56.69 | 16.38 | 17.80 | 19.06 | 20.30 | 21.50 | 22.56 | 23.50 | 24.38 | 25.13 | 25.75 | 26.29 |
| 60.13 | 15.89 | 17.34 | 18.62 | 19.87 | 20.92 | 21.96 | 22.97 | 23.82 | 24.62 | 25.24 | 25.71 |
| 63.84 | 16.07 | 17.47 | 18.83 | 19.97 | 21.20 | 22.31 | 23.28 | 24.11 | 24.92 | 25.50 | 26.05 |
| 67.83 | 16.20 | 17.56 | 18.95 | 20.18 | 21.38 | 22.44 | 23.38 | 24.24 | 25.08 | 25.76 | 26.29 |

|         |       |       |       |       |       |       |       |       |       |       |       |
|---------|-------|-------|-------|-------|-------|-------|-------|-------|-------|-------|-------|
| 72.15   | 16.25 | 17.52 | 18.96 | 20.14 | 21.32 | 22.42 | 23.33 | 24.24 | 25.01 | 25.60 | 26.13 |
| 76.8    | 16.25 | 17.56 | 18.89 | 20.08 | 21.24 | 22.35 | 23.32 | 24.18 | 24.98 | 25.62 | 26.14 |
| 81.81   | 16.68 | 18.11 | 19.43 | 20.59 | 21.77 | 22.86 | 23.82 | 24.76 | 25.50 | 26.15 | 26.72 |
| 87.22   | 16.65 | 17.98 | 19.36 | 20.58 | 21.78 | 22.91 | 23.89 | 24.77 | 25.59 | 26.22 | 26.84 |
| 93.06   | 17.22 | 18.60 | 19.99 | 21.28 | 22.48 | 23.64 | 24.56 | 25.54 | 26.30 | 27.02 | 27.53 |
| 99.35   | 17.67 | 19.05 | 20.44 | 21.73 | 22.95 | 24.10 | 25.12 | 26.03 | 26.85 | 27.55 | 28.18 |
| 106.13  | 17.32 | 18.65 | 20.03 | 21.22 | 22.47 | 23.56 | 24.56 | 25.39 | 26.20 | 26.93 | 27.47 |
| 113.45  | 17.62 | 19.05 | 20.43 | 21.73 | 22.91 | 24.05 | 25.04 | 26.00 | 26.82 | 27.52 | 28.12 |
| 121.34  | 17.18 | 18.57 | 19.94 | 21.19 | 22.34 | 23.42 | 24.38 | 25.35 | 26.21 | 26.88 | 27.52 |
| 129.86  | 17.51 | 19.01 | 20.33 | 21.65 | 22.84 | 24.01 | 25.02 | 26.00 | 26.81 | 27.51 | 28.07 |
| 139.04  | 18.62 | 20.10 | 21.45 | 22.75 | 23.92 | 25.07 | 26.06 | 27.08 | 27.90 | 28.59 | 29.25 |
| 148.94  | 18.74 | 20.21 | 21.61 | 22.96 | 24.18 | 25.33 | 26.39 | 27.30 | 28.16 | 28.92 | 29.51 |
| 159.62  | 18.58 | 20.01 | 21.38 | 22.63 | 23.87 | 24.97 | 26.03 | 26.97 | 27.81 | 28.59 | 29.19 |
| 171.14  | 18.69 | 20.12 | 21.46 | 22.70 | 23.97 | 25.18 | 26.23 | 27.14 | 28.03 | 28.75 | 29.41 |
| 183.56  | 18.47 | 19.94 | 21.30 | 22.63 | 23.86 | 25.04 | 26.08 | 27.08 | 27.98 | 28.70 | 29.30 |
| 196.96  | 19.29 | 20.78 | 22.18 | 23.59 | 24.84 | 26.02 | 27.08 | 28.10 | 29.01 | 29.74 | 30.38 |
| 211.41  | 19.72 | 21.21 | 22.68 | 23.99 | 25.31 | 26.45 | 27.50 | 28.54 | 29.49 | 30.17 | 30.84 |
| 226.99  | 20.41 | 21.96 | 23.32 | 24.72 | 26.05 | 27.24 | 28.39 | 29.50 | 30.29 | 31.16 | 31.87 |
| 243.8   | 20.00 | 21.50 | 22.91 | 24.35 | 25.59 | 26.81 | 27.84 | 28.85 | 29.79 | 30.53 | 31.26 |
| 261.93  | 20.62 | 22.09 | 23.57 | 24.98 | 26.19 | 27.48 | 28.57 | 29.64 | 30.53 | 31.37 | 32.03 |
| 281.48  | 20.87 | 22.45 | 23.87 | 25.28 | 26.63 | 27.85 | 28.91 | 30.01 | 30.89 | 31.76 | 32.43 |
| 302.56  | 21.45 | 23.01 | 24.46 | 25.82 | 27.18 | 28.46 | 29.56 | 30.55 | 31.58 | 32.38 | 33.04 |
| 325.3   | 21.44 | 23.09 | 24.50 | 25.85 | 27.23 | 28.45 | 29.52 | 30.63 | 31.55 | 32.37 | 33.13 |
| 349.83  | 21.12 | 22.67 | 24.15 | 25.55 | 26.78 | 28.00 | 29.08 | 30.11 | 31.04 | 31.84 | 32.63 |
| 376.28  | 22.08 | 23.72 | 25.13 | 26.59 | 27.93 | 29.18 | 30.37 | 31.41 | 32.42 | 33.24 | 33.98 |
| 404.81  | 22.10 | 23.61 | 25.22 | 26.54 | 27.98 | 29.20 | 30.41 | 31.45 | 32.34 | 33.15 | 33.91 |
| 435.58  | 22.55 | 24.16 | 25.68 | 27.07 | 28.46 | 29.79 | 30.94 | 31.98 | 32.95 | 33.84 | 34.59 |
| 468.76  | 23.24 | 24.89 | 26.42 | 27.88 | 29.19 | 30.53 | 31.69 | 32.79 | 33.76 | 34.63 | 35.44 |
| 504.55  | 23.38 | 25.00 | 26.57 | 27.98 | 29.38 | 30.68 | 31.77 | 32.96 | 33.90 | 34.76 | 35.55 |
| 543.15  | 23.58 | 25.16 | 26.59 | 28.09 | 29.55 | 30.76 | 31.99 | 33.04 | 34.06 | 34.95 | 35.68 |
| 584.78  | 24.02 | 25.62 | 27.09 | 28.51 | 29.92 | 31.21 | 32.41 | 33.59 | 34.59 | 35.45 | 36.26 |
| 629.68  | 24.33 | 25.97 | 27.48 | 29.01 | 30.36 | 31.63 | 32.86 | 34.02 | 35.08 | 35.99 | 36.80 |
| 678.1   | 24.63 | 26.14 | 27.76 | 29.20 | 30.58 | 31.89 | 33.02 | 34.12 | 35.19 | 36.06 | 36.86 |
| 730.33  | 24.79 | 26.39 | 27.96 | 29.44 | 30.79 | 32.06 | 33.27 | 34.42 | 35.48 | 36.40 | 37.19 |
| 786.65  | 24.73 | 26.13 | 27.74 | 29.22 | 30.60 | 31.92 | 33.14 | 34.30 | 35.29 | 36.24 | 37.00 |
| 847.4   | 25.33 | 26.93 | 28.57 | 30.02 | 31.46 | 32.72 | 34.03 | 35.09 | 36.17 | 37.10 | 37.93 |
| 912.92  | 24.99 | 26.61 | 28.15 | 29.64 | 31.12 | 32.42 | 33.63 | 34.68 | 35.75 | 36.71 | 37.44 |
| 983.58  | 24.98 | 26.61 | 28.04 | 29.59 | 30.97 | 32.30 | 33.45 | 34.65 | 35.65 | 36.53 | 37.35 |
| 1059.78 | 25.21 | 26.81 | 28.32 | 29.80 | 31.19 | 32.50 | 33.72 | 34.86 | 35.88 | 36.83 | 37.69 |
| 1141.98 | 25.07 | 26.61 | 28.13 | 29.61 | 30.95 | 32.27 | 33.42 | 34.54 | 35.52 | 36.46 | 37.28 |
| 1230.62 | 25.41 | 26.92 | 28.55 | 29.91 | 31.37 | 32.63 | 33.90 | 35.04 | 36.04 | 36.97 | 37.76 |
| 1326.23 | 25.92 | 27.48 | 29.08 | 30.50 | 31.98 | 33.25 | 34.53 | 35.68 | 36.71 | 37.65 | 38.48 |
| 1429.34 | 25.99 | 27.57 | 29.16 | 30.69 | 32.13 | 33.44 | 34.62 | 35.81 | 36.88 | 37.76 | 38.68 |
| 1540.54 | 25.75 | 27.40 | 28.94 | 30.48 | 31.87 | 33.23 | 34.46 | 35.64 | 36.68 | 37.54 | 38.44 |
| 1660.48 | 26.07 | 27.77 | 29.29 | 30.75 | 32.12 | 33.53 | 34.73 | 35.91 | 37.01 | 37.87 | 38.77 |
| 1789.83 | 26.07 | 27.58 | 29.14 | 30.71 | 32.12 | 33.49 | 34.67 | 35.83 | 36.92 | 37.82 | 38.68 |
| 1929.34 | 26.59 | 28.24 | 29.83 | 31.42 | 32.74 | 34.19 | 35.41 | 36.61 | 37.68 | 38.60 | 39.44 |
| 2079.8  | 25.45 | 27.11 | 28.55 | 30.09 | 31.50 | 32.88 | 34.08 | 35.25 | 36.29 | 37.15 | 38.12 |
| 2242.08 | 26.28 | 28.04 | 29.58 | 31.11 | 32.54 | 33.95 | 35.17 | 36.33 | 37.38 | 38.36 | 39.27 |
| 2417.1  | 26.07 | 27.76 | 29.21 | 30.73 | 32.17 | 33.43 | 34.73 | 35.88 | 36.95 | 37.81 | 38.66 |

|         |       |       |       |       |       |       |       |       |       |       |       |
|---------|-------|-------|-------|-------|-------|-------|-------|-------|-------|-------|-------|
| 2605.85 | 25.75 | 27.40 | 29.02 | 30.43 | 31.87 | 33.15 | 34.38 | 35.56 | 36.61 | 37.56 | 38.43 |
| 2809.43 | 25.82 | 27.42 | 28.93 | 30.44 | 31.85 | 33.10 | 34.43 | 35.62 | 36.63 | 37.56 | 38.42 |
| 3028.99 | 25.17 | 26.76 | 28.29 | 29.75 | 31.05 | 32.41 | 33.55 | 34.61 | 35.70 | 36.60 | 37.40 |
| 3265.79 | 25.35 | 26.84 | 28.41 | 29.91 | 31.17 | 32.53 | 33.78 | 34.90 | 35.93 | 36.83 | 37.66 |
| 3521.18 | 25.21 | 26.82 | 28.38 | 29.83 | 31.19 | 32.57 | 33.68 | 34.84 | 35.89 | 36.82 | 37.66 |
| 3796.62 | 25.64 | 27.29 | 28.79 | 30.30 | 31.64 | 32.95 | 34.14 | 35.32 | 36.37 | 37.32 | 38.11 |

| Wavelength (nm) / Time (ps) | 568.61 | 570.02 | 571.43 | 572.83 | 574.24 | 575.65 | 577.06 | 578.47 | 579.88 | 581.29 | 582.69 |
|-----------------------------|--------|--------|--------|--------|--------|--------|--------|--------|--------|--------|--------|
| -3.28                       | 0.14   | 0.20   | 0.18   | 0.17   | 0.16   | 0.18   | 0.13   | 0.12   | 0.16   | 0.15   | 0.15   |
| -2.78                       | 0.03   | 0.02   | -0.01  | 0.05   | 0.06   | 0.08   | 0.00   | 0.08   | 0.00   | 0.02   | -0.01  |
| -2.28                       | 0.15   | 0.16   | 0.16   | 0.15   | 0.21   | 0.13   | 0.16   | 0.13   | 0.09   | 0.07   | 0.13   |
| -1.78                       | 0.14   | 0.08   | 0.10   | 0.12   | 0.09   | 0.14   | 0.13   | 0.15   | 0.12   | 0.14   | 0.07   |
| -1.28                       | -0.09  | -0.15  | -0.10  | -0.08  | -0.07  | -0.06  | -0.06  | -0.03  | 0.00   | 0.00   | 0.04   |
| -0.78                       | -0.02  | 0.03   | 0.01   | 0.00   | -0.06  | -0.03  | 0.01   | -0.05  | -0.02  | -0.03  | -0.04  |
| -0.28                       | -0.58  | -0.59  | -0.54  | -0.58  | -0.58  | -0.58  | -0.56  | -0.55  | -0.51  | -0.44  | -0.46  |
| 0.22                        | 0.21   | 0.27   | 0.20   | 0.18   | 0.19   | 0.14   | 0.18   | 0.15   | 0.16   | 0.09   | 0.12   |
| 0.32                        | 0.29   | 0.30   | 0.32   | 0.34   | 0.37   | 0.30   | 0.29   | 0.31   | 0.30   | 0.28   | 0.33   |
| 0.42                        | 0.03   | 0.00   | 0.05   | 0.07   | 0.06   | 0.12   | 0.15   | 0.16   | 0.08   | 0.12   | 0.12   |
| 0.52                        | -0.14  | -0.20  | -0.21  | -0.16  | -0.20  | -0.17  | -0.17  | -0.10  | -0.13  | -0.16  | -0.12  |
| 0.62                        | 0.06   | -0.02  | 0.04   | 0.02   | 0.06   | 0.10   | 0.07   | 0.04   | -0.02  | 0.00   | 0.02   |
| 0.72                        | -0.21  | -0.13  | -0.14  | -0.09  | -0.11  | -0.07  | -0.09  | -0.04  | -0.10  | -0.12  | -0.09  |
| 0.77                        | 0.24   | 0.22   | 0.16   | 0.20   | 0.23   | 0.27   | 0.27   | 0.21   | 0.21   | 0.21   | 0.29   |
| 0.82                        | -0.06  | -0.05  | -0.06  | -0.05  | -0.07  | -0.01  | -0.10  | -0.10  | -0.10  | -0.10  | -0.11  |
| 0.87                        | -0.26  | -0.21  | -0.26  | -0.23  | -0.20  | -0.19  | -0.21  | -0.23  | -0.29  | -0.26  | -0.21  |
| 0.92                        | -0.03  | -0.13  | -0.09  | -0.11  | -0.13  | -0.09  | -0.15  | -0.05  | -0.02  | -0.05  | -0.03  |
| 0.97                        | 0.10   | 0.14   | 0.15   | 0.13   | 0.14   | 0.21   | 0.17   | 0.20   | 0.19   | 0.17   | 0.20   |
| 1.02                        | 0.32   | 0.28   | 0.29   | 0.27   | 0.31   | 0.25   | 0.30   | 0.22   | 0.21   | 0.22   | 0.23   |
| 1.07                        | 0.02   | 0.05   | 0.04   | 0.05   | 0.01   | 0.02   | 0.05   | 0.03   | 0.06   | 0.02   | 0.07   |
| 1.12                        | -0.21  | -0.13  | -0.12  | -0.20  | -0.15  | -0.14  | -0.17  | -0.18  | -0.15  | -0.15  | -0.17  |
| 1.17                        | 0.02   | -0.03  | 0.02   | 0.03   | 0.11   | 0.09   | 0.11   | 0.12   | 0.06   | 0.07   | 0.06   |
| 1.22                        | 0.38   | 0.43   | 0.37   | 0.37   | 0.33   | 0.37   | 0.42   | 0.29   | 0.35   | 0.28   | 0.35   |
| 1.27                        | 0.13   | 0.15   | 0.10   | 0.14   | 0.18   | 0.21   | 0.20   | 0.18   | 0.14   | 0.18   | 0.19   |
| 1.32                        | -0.03  | -0.05  | -0.10  | -0.07  | -0.10  | -0.03  | -0.06  | -0.03  | -0.07  | -0.08  | -0.09  |
| 1.37                        | -0.01  | 0.02   | 0.02   | -0.01  | 0.05   | 0.02   | 0.03   | 0.01   | 0.01   | -0.03  | 0.02   |
| 1.42                        | -0.06  | 0.00   | 0.00   | -0.06  | -0.01  | 0.13   | 0.10   | 0.08   | 0.14   | 0.11   | 0.16   |
| 1.47                        | 0.46   | 0.36   | 0.23   | 0.17   | 0.19   | 0.15   | 0.12   | 0.11   | 0.15   | 0.09   | 0.08   |
| 1.52                        | 4.12   | 3.90   | 3.66   | 3.44   | 3.09   | 2.86   | 2.61   | 2.38   | 2.20   | 1.96   | 1.86   |
| 1.57                        | 9.81   | 9.71   | 9.59   | 9.43   | 9.19   | 8.93   | 8.66   | 8.35   | 8.11   | 7.81   | 7.56   |
| 1.62                        | 14.09  | 14.57  | 14.89  | 15.21  | 15.37  | 15.44  | 15.50  | 15.54  | 15.52  | 15.47  | 15.39  |
| 1.67                        | 13.55  | 14.35  | 15.06  | 15.67  | 16.29  | 16.74  | 17.15  | 17.62  | 17.87  | 18.10  | 18.46  |
| 1.72                        | 11.72  | 12.39  | 12.94  | 13.56  | 14.13  | 14.56  | 14.99  | 15.29  | 15.66  | 15.97  | 16.27  |
| 1.77                        | 10.65  | 11.27  | 11.70  | 12.25  | 12.65  | 13.05  | 13.37  | 13.67  | 13.99  | 14.14  | 14.40  |
| 1.82                        | 9.82   | 10.28  | 10.70  | 11.15  | 11.49  | 11.79  | 12.15  | 12.35  | 12.63  | 12.81  | 12.97  |
| 1.87                        | 9.64   | 10.08  | 10.38  | 10.72  | 10.97  | 11.32  | 11.62  | 11.75  | 12.01  | 12.07  | 12.20  |
| 1.92                        | 10.49  | 10.92  | 11.19  | 11.51  | 11.78  | 12.00  | 12.18  | 12.39  | 12.42  | 12.50  | 12.55  |
| 1.97                        | 10.95  | 11.27  | 11.51  | 11.80  | 12.03  | 12.25  | 12.35  | 12.48  | 12.56  | 12.63  | 12.73  |
| 2.02                        | 12.10  | 12.35  | 12.58  | 12.78  | 12.98  | 13.07  | 13.16  | 13.28  | 13.30  | 13.27  | 13.33  |

|      |       |       |       |       |       |       |       |       |       |       |       |
|------|-------|-------|-------|-------|-------|-------|-------|-------|-------|-------|-------|
| 2.07 | 13.06 | 13.30 | 13.47 | 13.72 | 13.81 | 13.93 | 14.03 | 14.08 | 14.08 | 14.00 | 14.02 |
| 2.12 | 12.52 | 12.87 | 13.02 | 13.18 | 13.30 | 13.45 | 13.47 | 13.57 | 13.57 | 13.53 | 13.49 |
| 2.17 | 13.14 | 13.43 | 13.63 | 13.73 | 13.88 | 14.00 | 13.97 | 13.99 | 13.95 | 13.92 | 13.88 |
| 2.22 | 13.64 | 13.87 | 14.09 | 14.18 | 14.35 | 14.50 | 14.46 | 14.41 | 14.48 | 14.38 | 14.40 |
| 2.27 | 14.57 | 14.70 | 14.93 | 15.03 | 15.03 | 15.12 | 15.15 | 15.00 | 15.04 | 14.87 | 14.81 |
| 2.32 | 15.30 | 15.55 | 15.68 | 15.80 | 15.92 | 15.91 | 15.90 | 15.78 | 15.86 | 15.70 | 15.65 |
| 2.37 | 15.39 | 15.61 | 15.77 | 15.87 | 15.97 | 15.91 | 15.88 | 15.86 | 15.77 | 15.61 | 15.51 |
| 2.42 | 15.59 | 15.80 | 15.91 | 16.06 | 16.05 | 16.12 | 16.01 | 15.93 | 15.90 | 15.73 | 15.61 |
| 2.47 | 15.99 | 16.26 | 16.36 | 16.47 | 16.46 | 16.44 | 16.44 | 16.37 | 16.25 | 16.10 | 15.98 |
| 2.52 | 16.01 | 16.20 | 16.25 | 16.37 | 16.43 | 16.40 | 16.40 | 16.29 | 16.18 | 16.07 | 15.94 |
| 2.57 | 16.68 | 16.86 | 16.98 | 17.00 | 17.09 | 17.13 | 16.96 | 16.93 | 16.84 | 16.68 | 16.51 |
| 2.62 | 17.12 | 17.30 | 17.34 | 17.41 | 17.39 | 17.46 | 17.40 | 17.26 | 17.15 | 16.99 | 16.87 |
| 2.67 | 16.95 | 17.13 | 17.20 | 17.29 | 17.31 | 17.26 | 17.18 | 17.11 | 16.96 | 16.74 | 16.53 |
| 2.72 | 16.93 | 17.16 | 17.20 | 17.36 | 17.30 | 17.28 | 17.17 | 17.12 | 16.93 | 16.74 | 16.56 |
| 2.77 | 17.28 | 17.47 | 17.54 | 17.65 | 17.62 | 17.59 | 17.52 | 17.47 | 17.29 | 17.12 | 16.99 |
| 2.82 | 18.22 | 18.36 | 18.49 | 18.50 | 18.49 | 18.45 | 18.34 | 18.16 | 18.00 | 17.80 | 17.63 |
| 2.87 | 17.92 | 18.13 | 18.22 | 18.32 | 18.25 | 18.29 | 18.17 | 18.02 | 17.92 | 17.69 | 17.50 |
| 2.92 | 18.74 | 18.91 | 18.97 | 19.05 | 19.02 | 18.97 | 18.86 | 18.72 | 18.52 | 18.33 | 18.04 |
| 2.97 | 18.73 | 18.93 | 18.99 | 19.08 | 19.12 | 19.06 | 18.96 | 18.86 | 18.64 | 18.39 | 18.20 |
| 3.02 | 18.51 | 18.73 | 18.71 | 18.85 | 18.81 | 18.75 | 18.66 | 18.49 | 18.32 | 18.10 | 17.85 |
| 3.07 | 18.69 | 18.85 | 18.85 | 19.01 | 19.00 | 18.90 | 18.77 | 18.63 | 18.44 | 18.25 | 18.00 |
| 3.12 | 20.03 | 20.24 | 20.32 | 20.31 | 20.38 | 20.21 | 20.14 | 19.99 | 19.77 | 19.54 | 19.28 |
| 3.17 | 19.51 | 19.58 | 19.67 | 19.71 | 19.69 | 19.66 | 19.52 | 19.41 | 19.27 | 19.02 | 18.68 |
| 3.22 | 19.40 | 19.63 | 19.66 | 19.69 | 19.73 | 19.63 | 19.52 | 19.35 | 19.16 | 18.82 | 18.63 |
| 3.27 | 19.18 | 19.37 | 19.42 | 19.46 | 19.47 | 19.44 | 19.24 | 19.08 | 18.88 | 18.68 | 18.48 |
| 3.32 | 20.30 | 20.47 | 20.53 | 20.59 | 20.59 | 20.46 | 20.28 | 20.09 | 19.89 | 19.63 | 19.37 |
| 3.37 | 20.07 | 20.20 | 20.27 | 20.31 | 20.31 | 20.21 | 20.10 | 19.98 | 19.72 | 19.45 | 19.22 |
| 3.42 | 19.92 | 20.12 | 20.17 | 20.21 | 20.23 | 20.11 | 19.95 | 19.80 | 19.68 | 19.38 | 19.17 |
| 3.47 | 20.31 | 20.54 | 20.60 | 20.61 | 20.55 | 20.50 | 20.37 | 20.13 | 19.88 | 19.65 | 19.38 |
| 3.52 | 20.34 | 20.60 | 20.66 | 20.74 | 20.57 | 20.61 | 20.45 | 20.31 | 20.15 | 19.82 | 19.59 |
| 3.57 | 20.19 | 20.32 | 20.39 | 20.48 | 20.45 | 20.39 | 20.28 | 20.01 | 19.88 | 19.59 | 19.28 |
| 3.62 | 20.71 | 20.77 | 20.96 | 21.01 | 20.99 | 20.89 | 20.80 | 20.57 | 20.39 | 20.17 | 19.89 |
| 3.67 | 20.78 | 20.98 | 21.07 | 21.15 | 21.14 | 21.08 | 20.92 | 20.76 | 20.54 | 20.32 | 20.06 |
| 3.72 | 21.70 | 21.87 | 21.94 | 22.03 | 21.98 | 21.89 | 21.70 | 21.55 | 21.30 | 21.02 | 20.76 |
| 3.92 | 20.71 | 20.91 | 21.00 | 21.01 | 21.04 | 20.97 | 20.83 | 20.65 | 20.46 | 20.12 | 19.87 |
| 4.12 | 21.59 | 21.79 | 21.91 | 21.98 | 21.96 | 21.83 | 21.75 | 21.53 | 21.29 | 21.06 | 20.78 |
| 4.32 | 22.04 | 22.27 | 22.37 | 22.47 | 22.43 | 22.33 | 22.19 | 21.99 | 21.79 | 21.43 | 21.18 |
| 4.52 | 22.79 | 22.94 | 23.05 | 23.16 | 23.08 | 23.09 | 22.97 | 22.73 | 22.47 | 22.15 | 21.88 |
| 4.72 | 22.75 | 22.98 | 23.09 | 23.20 | 23.15 | 23.07 | 23.00 | 22.77 | 22.57 | 22.28 | 21.98 |
| 4.92 | 22.65 | 22.95 | 22.98 | 23.11 | 23.07 | 23.00 | 22.88 | 22.64 | 22.40 | 22.15 | 21.87 |
| 5.12 | 22.95 | 23.20 | 23.35 | 23.41 | 23.42 | 23.36 | 23.17 | 23.03 | 22.85 | 22.47 | 22.17 |
| 5.32 | 23.32 | 23.60 | 23.68 | 23.76 | 23.69 | 23.68 | 23.53 | 23.34 | 23.11 | 22.73 | 22.47 |
| 5.52 | 23.06 | 23.29 | 23.48 | 23.56 | 23.51 | 23.44 | 23.30 | 23.17 | 22.86 | 22.61 | 22.35 |
| 5.72 | 23.24 | 23.46 | 23.58 | 23.71 | 23.74 | 23.69 | 23.51 | 23.31 | 23.09 | 22.78 | 22.46 |
| 5.92 | 23.62 | 23.83 | 23.93 | 24.05 | 24.00 | 23.92 | 23.82 | 23.64 | 23.36 | 23.05 | 22.83 |
| 6.12 | 23.33 | 23.50 | 23.56 | 23.66 | 23.64 | 23.63 | 23.48 | 23.25 | 23.10 | 22.66 | 22.42 |
| 6.32 | 23.12 | 23.40 | 23.53 | 23.58 | 23.68 | 23.54 | 23.49 | 23.27 | 23.05 | 22.76 | 22.44 |
| 6.52 | 23.71 | 23.88 | 24.08 | 24.16 | 24.10 | 24.08 | 23.94 | 23.76 | 23.42 | 23.12 | 22.82 |
| 6.72 | 23.68 | 23.95 | 24.14 | 24.19 | 24.28 | 24.20 | 24.06 | 23.89 | 23.64 | 23.38 | 23.10 |
| 6.92 | 23.41 | 23.61 | 23.68 | 23.81 | 23.76 | 23.78 | 23.62 | 23.48 | 23.18 | 22.98 | 22.61 |



|       |       |       |       |       |       |       |       |       |       |       |       |
|-------|-------|-------|-------|-------|-------|-------|-------|-------|-------|-------|-------|
| 7.12  | 23.60 | 23.87 | 23.95 | 24.02 | 23.96 | 23.88 | 23.75 | 23.54 | 23.31 | 23.00 | 22.69 |
| 7.32  | 23.94 | 24.19 | 24.36 | 24.44 | 24.40 | 24.43 | 24.30 | 24.06 | 23.87 | 23.55 | 23.22 |
| 7.52  | 23.70 | 23.88 | 24.00 | 24.11 | 24.10 | 24.05 | 23.92 | 23.68 | 23.45 | 23.07 | 22.81 |
| 7.72  | 23.41 | 23.71 | 23.81 | 23.91 | 23.91 | 23.93 | 23.76 | 23.55 | 23.33 | 23.02 | 22.71 |
| 7.92  | 24.09 | 24.27 | 24.41 | 24.50 | 24.50 | 24.47 | 24.38 | 24.11 | 23.95 | 23.62 | 23.27 |
| 8.12  | 23.75 | 24.05 | 24.13 | 24.22 | 24.24 | 24.15 | 24.06 | 23.80 | 23.56 | 23.29 | 23.02 |
| 8.32  | 24.06 | 24.28 | 24.37 | 24.47 | 24.48 | 24.42 | 24.23 | 24.05 | 23.77 | 23.49 | 23.14 |
| 8.52  | 23.86 | 24.21 | 24.29 | 24.37 | 24.34 | 24.29 | 24.17 | 23.98 | 23.68 | 23.39 | 23.10 |
| 8.72  | 23.95 | 24.14 | 24.25 | 24.34 | 24.36 | 24.25 | 24.15 | 23.95 | 23.66 | 23.43 | 23.09 |
| 8.92  | 23.92 | 24.23 | 24.33 | 24.43 | 24.48 | 24.44 | 24.34 | 24.09 | 23.84 | 23.58 | 23.27 |
| 9.12  | 24.19 | 24.43 | 24.54 | 24.67 | 24.68 | 24.55 | 24.46 | 24.30 | 24.14 | 23.78 | 23.48 |
| 9.32  | 24.17 | 24.42 | 24.50 | 24.65 | 24.76 | 24.61 | 24.54 | 24.37 | 24.09 | 23.73 | 23.45 |
| 9.52  | 24.66 | 24.90 | 25.02 | 25.13 | 25.05 | 25.06 | 24.97 | 24.79 | 24.55 | 24.20 | 23.90 |
| 9.72  | 24.47 | 24.64 | 24.83 | 25.01 | 24.87 | 24.91 | 24.76 | 24.53 | 24.25 | 23.91 | 23.64 |
| 9.92  | 24.32 | 24.56 | 24.73 | 24.82 | 24.83 | 24.74 | 24.63 | 24.44 | 24.23 | 23.88 | 23.59 |
| 10.12 | 24.20 | 24.44 | 24.59 | 24.64 | 24.70 | 24.65 | 24.47 | 24.24 | 23.96 | 23.67 | 23.37 |
| 10.32 | 24.08 | 24.32 | 24.42 | 24.57 | 24.58 | 24.53 | 24.46 | 24.20 | 24.04 | 23.73 | 23.41 |
| 10.52 | 24.08 | 24.29 | 24.45 | 24.55 | 24.51 | 24.48 | 24.31 | 24.16 | 23.94 | 23.61 | 23.24 |
| 10.72 | 23.72 | 23.98 | 24.10 | 24.17 | 24.20 | 24.15 | 23.96 | 23.81 | 23.56 | 23.26 | 22.99 |
| 10.92 | 24.23 | 24.55 | 24.65 | 24.78 | 24.79 | 24.73 | 24.60 | 24.43 | 24.19 | 23.79 | 23.53 |
| 11.12 | 24.03 | 24.32 | 24.48 | 24.58 | 24.58 | 24.59 | 24.42 | 24.27 | 23.99 | 23.64 | 23.34 |
| 11.32 | 24.12 | 24.39 | 24.49 | 24.58 | 24.56 | 24.48 | 24.36 | 24.18 | 23.95 | 23.64 | 23.40 |
| 11.52 | 24.18 | 24.40 | 24.53 | 24.66 | 24.62 | 24.59 | 24.45 | 24.15 | 23.98 | 23.65 | 23.37 |
| 11.72 | 23.86 | 24.09 | 24.26 | 24.33 | 24.28 | 24.19 | 24.06 | 23.92 | 23.68 | 23.30 | 23.01 |
| 11.92 | 23.49 | 23.72 | 23.83 | 23.95 | 23.92 | 23.83 | 23.68 | 23.48 | 23.17 | 22.89 | 22.51 |
| 12.12 | 23.80 | 23.96 | 24.10 | 24.21 | 24.17 | 24.09 | 23.95 | 23.68 | 23.52 | 23.12 | 22.83 |
| 12.32 | 24.15 | 24.44 | 24.55 | 24.60 | 24.64 | 24.58 | 24.47 | 24.25 | 23.99 | 23.68 | 23.35 |
| 12.52 | 24.78 | 24.97 | 25.17 | 25.26 | 25.26 | 25.25 | 25.06 | 24.86 | 24.65 | 24.36 | 24.02 |
| 12.72 | 24.36 | 24.68 | 24.81 | 24.84 | 24.91 | 24.80 | 24.76 | 24.49 | 24.25 | 23.96 | 23.63 |
| 12.92 | 24.23 | 24.43 | 24.63 | 24.73 | 24.72 | 24.68 | 24.55 | 24.36 | 24.09 | 23.76 | 23.50 |
| 13.12 | 24.25 | 24.57 | 24.72 | 24.82 | 24.79 | 24.74 | 24.52 | 24.31 | 24.15 | 23.82 | 23.45 |
| 13.32 | 24.37 | 24.68 | 24.76 | 24.88 | 24.91 | 24.87 | 24.72 | 24.61 | 24.33 | 24.00 | 23.66 |
| 13.52 | 24.60 | 24.79 | 24.96 | 25.00 | 25.04 | 24.99 | 24.86 | 24.64 | 24.41 | 24.10 | 23.81 |
| 13.72 | 24.84 | 25.10 | 25.24 | 25.32 | 25.31 | 25.30 | 25.25 | 24.99 | 24.76 | 24.44 | 24.07 |
| 13.92 | 24.81 | 25.03 | 25.18 | 25.33 | 25.31 | 25.25 | 25.13 | 24.94 | 24.63 | 24.35 | 23.99 |
| 14    | 23.98 | 24.23 | 24.32 | 24.48 | 24.52 | 24.38 | 24.22 | 24.08 | 23.77 | 23.44 | 23.14 |
| 14.08 | 24.08 | 24.38 | 24.44 | 24.57 | 24.57 | 24.59 | 24.45 | 24.21 | 23.93 | 23.59 | 23.31 |
| 14.17 | 24.13 | 24.38 | 24.53 | 24.62 | 24.52 | 24.44 | 24.34 | 24.12 | 23.98 | 23.53 | 23.26 |
| 14.27 | 24.37 | 24.67 | 24.79 | 24.85 | 24.82 | 24.81 | 24.68 | 24.50 | 24.25 | 23.88 | 23.65 |
| 14.38 | 24.42 | 24.72 | 24.76 | 24.87 | 24.87 | 24.86 | 24.74 | 24.48 | 24.27 | 23.90 | 23.63 |
| 14.49 | 23.95 | 24.19 | 24.34 | 24.35 | 24.41 | 24.34 | 24.26 | 24.10 | 23.78 | 23.54 | 23.16 |
| 14.61 | 24.33 | 24.64 | 24.82 | 24.86 | 24.89 | 24.79 | 24.73 | 24.49 | 24.19 | 23.92 | 23.62 |
| 14.75 | 24.46 | 24.78 | 24.90 | 24.98 | 24.99 | 24.90 | 24.77 | 24.60 | 24.39 | 23.94 | 23.66 |
| 14.89 | 24.39 | 24.72 | 24.75 | 24.88 | 24.90 | 24.81 | 24.75 | 24.51 | 24.29 | 23.97 | 23.63 |
| 15.05 | 24.93 | 25.25 | 25.35 | 25.47 | 25.46 | 25.40 | 25.25 | 25.10 | 24.86 | 24.57 | 24.27 |
| 15.21 | 24.43 | 24.66 | 24.75 | 24.86 | 24.91 | 24.75 | 24.66 | 24.39 | 24.23 | 23.88 | 23.58 |
| 15.39 | 24.22 | 24.46 | 24.63 | 24.73 | 24.73 | 24.64 | 24.48 | 24.33 | 24.08 | 23.75 | 23.38 |
| 15.59 | 24.31 | 24.65 | 24.75 | 24.84 | 24.82 | 24.80 | 24.71 | 24.52 | 24.22 | 23.96 | 23.61 |
| 15.8  | 23.89 | 24.09 | 24.19 | 24.32 | 24.32 | 24.24 | 24.15 | 23.95 | 23.73 | 23.41 | 23.11 |
| 16.02 | 24.18 | 24.45 | 24.55 | 24.63 | 24.69 | 24.58 | 24.43 | 24.25 | 24.03 | 23.73 | 23.37 |

|        |       |       |       |       |       |       |       |       |       |       |       |
|--------|-------|-------|-------|-------|-------|-------|-------|-------|-------|-------|-------|
| 16.27  | 24.96 | 25.27 | 25.34 | 25.39 | 25.42 | 25.42 | 25.28 | 25.00 | 24.75 | 24.49 | 24.17 |
| 16.53  | 24.60 | 24.88 | 24.99 | 25.12 | 25.07 | 24.94 | 24.87 | 24.67 | 24.36 | 24.08 | 23.73 |
| 16.81  | 24.50 | 24.86 | 24.98 | 25.15 | 25.11 | 25.04 | 24.90 | 24.75 | 24.53 | 24.15 | 23.79 |
| 17.12  | 24.26 | 24.53 | 24.61 | 24.73 | 24.74 | 24.72 | 24.55 | 24.37 | 24.09 | 23.75 | 23.43 |
| 17.45  | 24.63 | 24.87 | 25.06 | 25.14 | 25.15 | 25.08 | 25.00 | 24.69 | 24.49 | 24.12 | 23.90 |
| 17.81  | 24.90 | 25.14 | 25.25 | 25.39 | 25.37 | 25.34 | 25.15 | 24.93 | 24.78 | 24.42 | 24.13 |
| 18.19  | 24.81 | 25.11 | 25.32 | 25.40 | 25.38 | 25.39 | 25.26 | 25.03 | 24.78 | 24.38 | 24.13 |
| 18.6   | 24.18 | 24.50 | 24.64 | 24.77 | 24.76 | 24.68 | 24.54 | 24.34 | 24.07 | 23.77 | 23.49 |
| 19.05  | 24.48 | 24.78 | 24.89 | 25.05 | 25.02 | 24.99 | 24.91 | 24.69 | 24.46 | 24.11 | 23.80 |
| 19.53  | 25.01 | 25.21 | 25.36 | 25.44 | 25.52 | 25.45 | 25.30 | 25.10 | 24.84 | 24.56 | 24.18 |
| 20.05  | 24.28 | 24.59 | 24.69 | 24.75 | 24.74 | 24.76 | 24.64 | 24.45 | 24.18 | 23.93 | 23.58 |
| 20.61  | 24.83 | 25.13 | 25.27 | 25.41 | 25.34 | 25.32 | 25.23 | 25.02 | 24.66 | 24.37 | 24.07 |
| 21.22  | 24.48 | 24.75 | 24.85 | 25.06 | 25.06 | 25.00 | 24.82 | 24.61 | 24.36 | 24.06 | 23.80 |
| 21.87  | 24.55 | 24.76 | 24.92 | 25.02 | 25.01 | 25.02 | 24.82 | 24.63 | 24.37 | 24.02 | 23.74 |
| 22.57  | 24.88 | 25.15 | 25.31 | 25.43 | 25.49 | 25.45 | 25.31 | 25.10 | 24.82 | 24.53 | 24.15 |
| 23.33  | 24.61 | 24.92 | 25.06 | 25.20 | 25.11 | 25.11 | 24.90 | 24.73 | 24.51 | 24.19 | 23.88 |
| 24.15  | 25.00 | 25.31 | 25.43 | 25.57 | 25.54 | 25.49 | 25.41 | 25.19 | 25.00 | 24.68 | 24.38 |
| 25.03  | 25.19 | 25.36 | 25.56 | 25.67 | 25.61 | 25.63 | 25.48 | 25.35 | 25.04 | 24.66 | 24.41 |
| 25.98  | 24.37 | 24.66 | 24.81 | 24.94 | 24.93 | 24.90 | 24.78 | 24.60 | 24.38 | 24.02 | 23.76 |
| 27.01  | 24.46 | 24.72 | 24.91 | 25.07 | 25.09 | 25.13 | 24.93 | 24.79 | 24.55 | 24.19 | 23.88 |
| 28.11  | 24.66 | 24.91 | 25.06 | 25.21 | 25.19 | 25.14 | 25.11 | 24.85 | 24.61 | 24.24 | 23.92 |
| 29.3   | 25.01 | 25.25 | 25.48 | 25.59 | 25.60 | 25.56 | 25.44 | 25.30 | 25.02 | 24.72 | 24.39 |
| 30.59  | 24.38 | 24.69 | 24.84 | 24.93 | 24.96 | 24.91 | 24.76 | 24.68 | 24.42 | 24.13 | 23.86 |
| 31.98  | 25.06 | 25.33 | 25.52 | 25.66 | 25.66 | 25.57 | 25.46 | 25.27 | 25.05 | 24.66 | 24.42 |
| 33.47  | 25.17 | 25.41 | 25.63 | 25.76 | 25.74 | 25.68 | 25.59 | 25.38 | 25.20 | 24.81 | 24.46 |
| 35.09  | 25.35 | 25.62 | 25.75 | 25.92 | 25.94 | 25.81 | 25.74 | 25.57 | 25.34 | 24.96 | 24.67 |
| 36.83  | 25.54 | 25.82 | 26.01 | 26.12 | 26.17 | 26.09 | 25.98 | 25.81 | 25.52 | 25.22 | 24.97 |
| 38.71  | 25.59 | 25.84 | 26.02 | 26.08 | 26.15 | 26.11 | 25.97 | 25.83 | 25.65 | 25.27 | 24.95 |
| 40.73  | 25.55 | 25.98 | 26.08 | 26.18 | 26.21 | 26.23 | 26.06 | 25.92 | 25.66 | 25.41 | 25.12 |
| 42.92  | 26.58 | 26.94 | 27.15 | 27.29 | 27.31 | 27.27 | 27.16 | 26.93 | 26.70 | 26.37 | 26.05 |
| 45.27  | 25.53 | 25.85 | 26.04 | 26.15 | 26.15 | 26.12 | 26.08 | 25.84 | 25.62 | 25.32 | 25.05 |
| 47.81  | 25.82 | 26.18 | 26.31 | 26.49 | 26.48 | 26.48 | 26.43 | 26.26 | 26.07 | 25.80 | 25.40 |
| 50.55  | 25.82 | 26.09 | 26.28 | 26.37 | 26.42 | 26.44 | 26.31 | 26.20 | 25.95 | 25.67 | 25.36 |
| 53.51  | 25.85 | 26.13 | 26.32 | 26.46 | 26.53 | 26.48 | 26.39 | 26.29 | 26.05 | 25.74 | 25.49 |
| 56.69  | 26.75 | 27.09 | 27.20 | 27.40 | 27.48 | 27.36 | 27.32 | 27.14 | 26.92 | 26.57 | 26.25 |
| 60.13  | 26.13 | 26.44 | 26.62 | 26.76 | 26.90 | 26.87 | 26.83 | 26.62 | 26.45 | 26.14 | 25.82 |
| 63.84  | 26.49 | 26.83 | 27.01 | 27.19 | 27.26 | 27.35 | 27.18 | 27.02 | 26.88 | 26.55 | 26.26 |
| 67.83  | 26.73 | 27.07 | 27.23 | 27.47 | 27.51 | 27.55 | 27.48 | 27.37 | 27.14 | 26.85 | 26.56 |
| 72.15  | 26.61 | 26.89 | 27.10 | 27.32 | 27.35 | 27.37 | 27.34 | 27.26 | 27.04 | 26.74 | 26.51 |
| 76.8   | 26.58 | 26.90 | 27.10 | 27.26 | 27.35 | 27.37 | 27.28 | 27.17 | 27.03 | 26.74 | 26.46 |
| 81.81  | 27.14 | 27.49 | 27.68 | 27.83 | 27.93 | 27.99 | 27.84 | 27.70 | 27.52 | 27.20 | 26.92 |
| 87.22  | 27.22 | 27.50 | 27.72 | 27.93 | 27.98 | 27.97 | 27.91 | 27.75 | 27.60 | 27.30 | 27.04 |
| 93.06  | 28.06 | 28.37 | 28.59 | 28.83 | 28.89 | 28.94 | 28.92 | 28.76 | 28.52 | 28.21 | 27.94 |
| 99.35  | 28.55 | 28.94 | 29.22 | 29.40 | 29.51 | 29.56 | 29.48 | 29.38 | 29.21 | 28.91 | 28.72 |
| 106.13 | 27.92 | 28.36 | 28.56 | 28.74 | 28.87 | 28.91 | 28.86 | 28.80 | 28.62 | 28.37 | 28.11 |
| 113.45 | 28.53 | 28.86 | 29.14 | 29.36 | 29.50 | 29.47 | 29.47 | 29.32 | 29.17 | 28.94 | 28.68 |
| 121.34 | 27.92 | 28.34 | 28.55 | 28.79 | 28.87 | 28.91 | 28.87 | 28.81 | 28.64 | 28.34 | 28.07 |
| 129.86 | 28.61 | 28.98 | 29.30 | 29.51 | 29.65 | 29.77 | 29.75 | 29.66 | 29.56 | 29.23 | 29.02 |
| 139.04 | 29.72 | 30.11 | 30.40 | 30.65 | 30.84 | 30.83 | 30.84 | 30.79 | 30.56 | 30.28 | 30.06 |
| 148.94 | 30.05 | 30.44 | 30.70 | 30.98 | 31.04 | 31.17 | 31.13 | 31.10 | 31.00 | 30.77 | 30.53 |

|         |       |       |       |       |       |       |       |       |       |       |       |
|---------|-------|-------|-------|-------|-------|-------|-------|-------|-------|-------|-------|
| 159.62  | 29.66 | 30.08 | 30.33 | 30.55 | 30.72 | 30.77 | 30.80 | 30.72 | 30.62 | 30.33 | 30.09 |
| 171.14  | 29.88 | 30.33 | 30.63 | 30.85 | 31.03 | 31.09 | 31.10 | 31.05 | 30.92 | 30.65 | 30.48 |
| 183.56  | 29.83 | 30.25 | 30.58 | 30.86 | 31.00 | 31.09 | 31.11 | 31.05 | 30.96 | 30.70 | 30.54 |
| 196.96  | 30.94 | 31.35 | 31.65 | 31.93 | 32.12 | 32.21 | 32.33 | 32.22 | 32.12 | 31.92 | 31.74 |
| 211.41  | 31.41 | 31.84 | 32.22 | 32.41 | 32.59 | 32.70 | 32.78 | 32.74 | 32.62 | 32.41 | 32.16 |
| 226.99  | 32.46 | 32.91 | 33.19 | 33.51 | 33.68 | 33.79 | 33.84 | 33.75 | 33.72 | 33.54 | 33.34 |
| 243.8   | 31.82 | 32.26 | 32.67 | 32.95 | 33.10 | 33.27 | 33.29 | 33.34 | 33.19 | 33.02 | 32.84 |
| 261.93  | 32.64 | 33.07 | 33.50 | 33.84 | 34.09 | 34.19 | 34.28 | 34.27 | 34.16 | 34.00 | 33.81 |
| 281.48  | 33.06 | 33.54 | 33.88 | 34.28 | 34.45 | 34.61 | 34.63 | 34.62 | 34.55 | 34.29 | 34.19 |
| 302.56  | 33.69 | 34.22 | 34.63 | 34.99 | 35.23 | 35.36 | 35.41 | 35.44 | 35.32 | 35.16 | 34.96 |
| 325.3   | 33.75 | 34.25 | 34.66 | 35.02 | 35.20 | 35.44 | 35.47 | 35.52 | 35.48 | 35.33 | 35.17 |
| 349.83  | 33.18 | 33.71 | 34.13 | 34.42 | 34.66 | 34.79 | 34.93 | 35.01 | 34.98 | 34.77 | 34.75 |
| 376.28  | 34.59 | 35.19 | 35.60 | 35.95 | 36.18 | 36.41 | 36.55 | 36.57 | 36.53 | 36.36 | 36.24 |
| 404.81  | 34.54 | 35.12 | 35.56 | 35.92 | 36.22 | 36.38 | 36.44 | 36.45 | 36.43 | 36.35 | 36.28 |
| 435.58  | 35.24 | 35.80 | 36.25 | 36.61 | 36.88 | 37.15 | 37.28 | 37.33 | 37.29 | 37.14 | 37.05 |
| 468.76  | 36.10 | 36.66 | 37.04 | 37.44 | 37.75 | 38.00 | 38.09 | 38.15 | 38.17 | 38.00 | 37.93 |
| 504.55  | 36.25 | 36.75 | 37.27 | 37.67 | 37.94 | 38.17 | 38.31 | 38.40 | 38.39 | 38.30 | 38.26 |
| 543.15  | 36.41 | 36.94 | 37.39 | 37.84 | 38.16 | 38.38 | 38.50 | 38.59 | 38.62 | 38.53 | 38.42 |
| 584.78  | 36.97 | 37.52 | 37.93 | 38.38 | 38.68 | 39.01 | 39.14 | 39.20 | 39.20 | 39.14 | 39.03 |
| 629.68  | 37.44 | 38.08 | 38.52 | 38.99 | 39.31 | 39.61 | 39.79 | 39.81 | 39.82 | 39.75 | 39.70 |
| 678.1   | 37.53 | 38.14 | 38.63 | 39.07 | 39.38 | 39.62 | 39.78 | 39.79 | 39.83 | 39.73 | 39.68 |
| 730.33  | 37.95 | 38.56 | 38.99 | 39.46 | 39.84 | 40.10 | 40.25 | 40.40 | 40.42 | 40.36 | 40.30 |
| 786.65  | 37.71 | 38.31 | 38.83 | 39.31 | 39.66 | 39.92 | 40.12 | 40.19 | 40.30 | 40.28 | 40.20 |
| 847.4   | 38.67 | 39.28 | 39.76 | 40.20 | 40.54 | 40.80 | 41.03 | 41.15 | 41.20 | 41.13 | 41.04 |
| 912.92  | 38.24 | 38.82 | 39.28 | 39.79 | 40.07 | 40.41 | 40.57 | 40.71 | 40.79 | 40.65 | 40.61 |
| 983.58  | 38.09 | 38.68 | 39.19 | 39.68 | 39.99 | 40.29 | 40.40 | 40.53 | 40.63 | 40.51 | 40.54 |
| 1059.78 | 38.35 | 38.98 | 39.43 | 39.93 | 40.33 | 40.58 | 40.72 | 40.91 | 40.90 | 40.84 | 40.84 |
| 1141.98 | 37.94 | 38.58 | 39.04 | 39.50 | 39.81 | 40.17 | 40.36 | 40.42 | 40.56 | 40.50 | 40.42 |
| 1230.62 | 38.43 | 39.11 | 39.62 | 40.06 | 40.45 | 40.77 | 40.98 | 41.01 | 41.04 | 41.13 | 41.06 |
| 1326.23 | 39.23 | 39.85 | 40.40 | 40.83 | 41.24 | 41.53 | 41.75 | 41.86 | 41.94 | 41.92 | 41.82 |
| 1429.34 | 39.37 | 40.04 | 40.60 | 41.01 | 41.36 | 41.61 | 41.83 | 42.02 | 42.03 | 42.01 | 42.01 |
| 1540.54 | 39.18 | 39.84 | 40.30 | 40.82 | 41.15 | 41.45 | 41.64 | 41.75 | 41.86 | 41.80 | 41.77 |
| 1660.48 | 39.46 | 40.10 | 40.66 | 41.12 | 41.59 | 41.82 | 42.15 | 42.20 | 42.28 | 42.26 | 42.20 |
| 1789.83 | 39.45 | 40.03 | 40.62 | 41.07 | 41.43 | 41.76 | 41.98 | 42.15 | 42.26 | 42.21 | 42.26 |
| 1929.34 | 40.13 | 40.83 | 41.37 | 41.85 | 42.18 | 42.49 | 42.79 | 42.88 | 42.94 | 42.89 | 42.84 |
| 2079.8  | 38.79 | 39.40 | 39.93 | 40.44 | 40.83 | 41.10 | 41.35 | 41.50 | 41.55 | 41.52 | 41.53 |
| 2242.08 | 39.94 | 40.66 | 41.13 | 41.68 | 42.01 | 42.36 | 42.56 | 42.72 | 42.77 | 42.76 | 42.67 |
| 2417.1  | 39.39 | 40.04 | 40.55 | 41.09 | 41.44 | 41.75 | 41.91 | 42.09 | 42.10 | 42.06 | 42.07 |
| 2605.85 | 39.12 | 39.80 | 40.27 | 40.79 | 41.12 | 41.47 | 41.67 | 41.78 | 41.75 | 41.85 | 41.82 |
| 2809.43 | 39.10 | 39.72 | 40.29 | 40.71 | 41.14 | 41.42 | 41.64 | 41.76 | 41.75 | 41.77 | 41.75 |
| 3028.99 | 38.07 | 38.70 | 39.25 | 39.70 | 40.05 | 40.32 | 40.56 | 40.66 | 40.71 | 40.67 | 40.62 |
| 3265.79 | 38.35 | 39.01 | 39.52 | 40.03 | 40.35 | 40.62 | 40.87 | 40.95 | 41.02 | 41.02 | 40.96 |
| 3521.18 | 38.33 | 38.96 | 39.46 | 39.96 | 40.32 | 40.63 | 40.78 | 40.96 | 41.08 | 41.01 | 40.91 |
| 3796.62 | 38.87 | 39.43 | 39.93 | 40.43 | 40.80 | 41.20 | 41.30 | 41.43 | 41.55 | 41.53 | 41.49 |

| Wavelength (nm) | 584.10 | 585.51 | 586.92 | 588.33 | 589.74 | 591.15 | 592.55 | 593.96 | 595.37 | 596.78 | 598.19 |      |
|-----------------|--------|--------|--------|--------|--------|--------|--------|--------|--------|--------|--------|------|
| Time (ps)       | -3.28  | 0.13   | 0.11   | 0.10   | 0.12   | 0.11   | 0.14   | 0.10   | 0.12   | 0.12   | 0.11   | 0.14 |

|       |       |       |       |       |       |       |       |       |       |       |       |
|-------|-------|-------|-------|-------|-------|-------|-------|-------|-------|-------|-------|
| -2.78 | -0.05 | -0.01 | 0.03  | 0.00  | 0.11  | -0.03 | 0.04  | -0.02 | -0.03 | 0.04  | -0.06 |
| -2.28 | 0.15  | 0.14  | 0.11  | 0.08  | 0.10  | 0.14  | 0.08  | 0.11  | 0.09  | 0.10  | 0.13  |
| -1.78 | 0.13  | 0.10  | 0.14  | 0.10  | 0.03  | 0.13  | 0.07  | 0.13  | 0.12  | 0.16  | 0.10  |
| -1.28 | 0.04  | 0.01  | 0.01  | 0.06  | -0.05 | -0.02 | -0.01 | -0.01 | -0.05 | -0.02 | 0.00  |
| -0.78 | -0.05 | -0.03 | 0.01  | -0.05 | -0.09 | -0.02 | -0.02 | -0.08 | -0.03 | -0.06 | -0.02 |
| -0.28 | -0.47 | -0.45 | -0.46 | -0.40 | -0.34 | -0.39 | -0.40 | -0.36 | -0.38 | -0.41 | -0.40 |
| 0.22  | 0.11  | 0.13  | 0.07  | 0.10  | 0.12  | 0.06  | 0.14  | 0.12  | 0.16  | 0.10  | 0.11  |
| 0.32  | 0.31  | 0.30  | 0.31  | 0.33  | 0.36  | 0.38  | 0.33  | 0.35  | 0.35  | 0.34  | 0.33  |
| 0.42  | 0.10  | 0.15  | 0.12  | 0.10  | 0.12  | 0.17  | 0.13  | 0.11  | 0.12  | 0.13  | 0.12  |
| 0.52  | -0.15 | -0.13 | -0.13 | -0.17 | -0.14 | -0.16 | -0.19 | -0.15 | -0.20 | -0.16 | -0.20 |
| 0.62  | 0.01  | -0.04 | -0.01 | 0.01  | 0.00  | 0.02  | 0.03  | -0.05 | -0.04 | 0.02  | 0.03  |
| 0.72  | -0.09 | -0.02 | -0.05 | -0.07 | -0.07 | -0.01 | -0.06 | -0.08 | -0.07 | -0.04 | -0.05 |
| 0.77  | 0.25  | 0.23  | 0.21  | 0.28  | 0.28  | 0.27  | 0.23  | 0.27  | 0.23  | 0.23  | 0.22  |
| 0.82  | -0.10 | -0.17 | -0.06 | -0.14 | -0.10 | -0.08 | -0.07 | -0.06 | -0.07 | -0.03 | -0.06 |
| 0.87  | -0.27 | -0.25 | -0.23 | -0.19 | -0.18 | -0.20 | -0.19 | -0.22 | -0.25 | -0.21 | -0.26 |
| 0.92  | -0.02 | -0.01 | 0.00  | -0.03 | 0.03  | 0.01  | 0.03  | -0.05 | -0.01 | 0.01  | -0.01 |
| 0.97  | 0.24  | 0.23  | 0.29  | 0.15  | 0.21  | 0.18  | 0.22  | 0.17  | 0.16  | 0.16  | 0.23  |
| 1.02  | 0.15  | 0.18  | 0.17  | 0.16  | 0.18  | 0.22  | 0.20  | 0.17  | 0.15  | 0.18  | 0.18  |
| 1.07  | 0.11  | 0.01  | 0.02  | 0.05  | 0.03  | 0.11  | 0.03  | 0.05  | 0.06  | 0.11  | 0.08  |
| 1.12  | -0.10 | -0.11 | -0.09 | -0.06 | -0.10 | -0.10 | -0.13 | -0.12 | -0.13 | -0.06 | -0.10 |
| 1.17  | 0.11  | 0.09  | 0.11  | 0.06  | 0.03  | 0.05  | 0.02  | 0.00  | 0.00  | 0.05  | 0.08  |
| 1.22  | 0.30  | 0.28  | 0.27  | 0.30  | 0.32  | 0.31  | 0.30  | 0.27  | 0.30  | 0.28  | 0.26  |
| 1.27  | 0.19  | 0.22  | 0.23  | 0.15  | 0.19  | 0.19  | 0.19  | 0.13  | 0.13  | 0.17  | 0.16  |
| 1.32  | -0.05 | -0.07 | -0.04 | -0.04 | -0.05 | -0.03 | -0.01 | -0.02 | -0.01 | -0.02 | -0.01 |
| 1.37  | -0.05 | 0.02  | -0.02 | 0.00  | 0.00  | 0.04  | -0.01 | 0.00  | 0.07  | 0.05  | 0.08  |
| 1.42  | 0.15  | 0.13  | 0.17  | 0.13  | 0.16  | 0.22  | 0.12  | 0.15  | 0.13  | 0.18  | 0.15  |
| 1.47  | 0.09  | 0.05  | 0.06  | -0.03 | -0.03 | -0.09 | -0.08 | -0.12 | -0.04 | -0.02 | 0.06  |
| 1.52  | 1.71  | 1.51  | 1.38  | 1.25  | 1.10  | 0.96  | 0.73  | 0.63  | 0.56  | 0.53  | 0.41  |
| 1.57  | 7.30  | 7.07  | 6.70  | 6.42  | 6.21  | 5.93  | 5.53  | 5.20  | 4.90  | 4.60  | 4.31  |
| 1.62  | 15.25 | 15.09 | 15.05 | 14.82 | 14.57 | 14.39 | 14.04 | 13.66 | 13.30 | 12.89 | 12.51 |
| 1.67  | 18.62 | 18.83 | 19.01 | 19.20 | 19.24 | 19.40 | 19.40 | 19.35 | 19.38 | 19.42 | 19.34 |
| 1.72  | 16.47 | 16.69 | 16.85 | 17.09 | 17.21 | 17.43 | 17.54 | 17.75 | 17.86 | 17.96 | 18.11 |
| 1.77  | 14.52 | 14.71 | 14.88 | 14.98 | 15.09 | 15.24 | 15.36 | 15.45 | 15.52 | 15.61 | 15.76 |
| 1.82  | 13.13 | 13.26 | 13.35 | 13.45 | 13.61 | 13.65 | 13.69 | 13.76 | 13.81 | 13.91 | 13.99 |
| 1.87  | 12.36 | 12.41 | 12.47 | 12.54 | 12.54 | 12.59 | 12.59 | 12.66 | 12.68 | 12.72 | 12.82 |
| 1.92  | 12.65 | 12.63 | 12.68 | 12.73 | 12.66 | 12.71 | 12.69 | 12.63 | 12.66 | 12.70 | 12.70 |
| 1.97  | 12.66 | 12.69 | 12.68 | 12.62 | 12.58 | 12.60 | 12.51 | 12.47 | 12.46 | 12.41 | 12.45 |
| 2.02  | 13.31 | 13.23 | 13.17 | 13.16 | 13.13 | 13.00 | 12.92 | 12.87 | 12.76 | 12.73 | 12.66 |
| 2.07  | 14.02 | 13.92 | 13.95 | 13.83 | 13.67 | 13.63 | 13.47 | 13.37 | 13.33 | 13.26 | 13.19 |
| 2.12  | 13.41 | 13.36 | 13.32 | 13.20 | 13.08 | 13.04 | 12.92 | 12.79 | 12.66 | 12.57 | 12.56 |
| 2.17  | 13.84 | 13.75 | 13.62 | 13.50 | 13.45 | 13.39 | 13.22 | 13.08 | 13.00 | 12.90 | 12.88 |
| 2.22  | 14.27 | 14.18 | 14.07 | 13.91 | 13.83 | 13.66 | 13.64 | 13.45 | 13.31 | 13.18 | 13.12 |
| 2.27  | 14.71 | 14.58 | 14.51 | 14.32 | 14.23 | 14.13 | 13.92 | 13.77 | 13.69 | 13.58 | 13.51 |
| 2.32  | 15.49 | 15.38 | 15.24 | 15.06 | 14.95 | 14.73 | 14.64 | 14.45 | 14.35 | 14.22 | 14.11 |
| 2.37  | 15.38 | 15.28 | 15.06 | 14.99 | 14.74 | 14.63 | 14.46 | 14.30 | 14.23 | 14.02 | 13.89 |
| 2.42  | 15.53 | 15.37 | 15.18 | 15.01 | 14.82 | 14.69 | 14.56 | 14.30 | 14.21 | 14.02 | 13.94 |
| 2.47  | 15.86 | 15.73 | 15.47 | 15.35 | 15.22 | 15.02 | 14.82 | 14.60 | 14.46 | 14.39 | 14.25 |
| 2.52  | 15.81 | 15.64 | 15.38 | 15.25 | 15.04 | 14.85 | 14.69 | 14.49 | 14.36 | 14.10 | 13.96 |
| 2.57  | 16.39 | 16.18 | 16.01 | 15.84 | 15.67 | 15.47 | 15.22 | 15.05 | 14.80 | 14.70 | 14.56 |
| 2.62  | 16.64 | 16.50 | 16.27 | 16.04 | 15.87 | 15.69 | 15.46 | 15.29 | 14.96 | 14.88 | 14.71 |

|      |       |       |       |       |       |       |       |       |       |       |       |
|------|-------|-------|-------|-------|-------|-------|-------|-------|-------|-------|-------|
| 2.67 | 16.39 | 16.16 | 15.93 | 15.68 | 15.57 | 15.34 | 15.07 | 14.94 | 14.67 | 14.48 | 14.38 |
| 2.72 | 16.39 | 16.13 | 15.96 | 15.68 | 15.48 | 15.28 | 15.06 | 14.83 | 14.71 | 14.51 | 14.38 |
| 2.77 | 16.78 | 16.58 | 16.36 | 16.11 | 15.93 | 15.61 | 15.41 | 15.18 | 14.95 | 14.80 | 14.62 |
| 2.82 | 17.40 | 17.09 | 16.93 | 16.67 | 16.41 | 16.15 | 15.96 | 15.68 | 15.48 | 15.26 | 15.11 |
| 2.87 | 17.36 | 17.14 | 16.86 | 16.68 | 16.37 | 16.21 | 15.88 | 15.65 | 15.45 | 15.29 | 15.08 |
| 2.92 | 17.83 | 17.56 | 17.32 | 17.03 | 16.77 | 16.51 | 16.24 | 15.99 | 15.80 | 15.60 | 15.37 |
| 2.97 | 17.99 | 17.71 | 17.45 | 17.18 | 16.87 | 16.63 | 16.35 | 16.13 | 15.92 | 15.61 | 15.45 |
| 3.02 | 17.63 | 17.37 | 17.12 | 16.86 | 16.52 | 16.24 | 16.01 | 15.82 | 15.53 | 15.30 | 15.06 |
| 3.07 | 17.75 | 17.46 | 17.19 | 16.94 | 16.72 | 16.42 | 16.10 | 15.91 | 15.65 | 15.36 | 15.11 |
| 3.12 | 19.05 | 18.76 | 18.50 | 18.21 | 17.91 | 17.65 | 17.34 | 17.03 | 16.78 | 16.57 | 16.36 |
| 3.17 | 18.53 | 18.22 | 17.93 | 17.64 | 17.32 | 17.10 | 16.78 | 16.48 | 16.24 | 15.97 | 15.71 |
| 3.22 | 18.41 | 18.09 | 17.86 | 17.48 | 17.24 | 16.92 | 16.65 | 16.36 | 16.06 | 15.83 | 15.63 |
| 3.27 | 18.15 | 17.88 | 17.61 | 17.28 | 17.00 | 16.69 | 16.43 | 16.18 | 15.89 | 15.65 | 15.42 |
| 3.32 | 19.12 | 18.85 | 18.49 | 18.20 | 17.91 | 17.60 | 17.31 | 17.05 | 16.73 | 16.46 | 16.25 |
| 3.37 | 18.95 | 18.65 | 18.31 | 18.05 | 17.75 | 17.39 | 17.08 | 16.77 | 16.49 | 16.25 | 16.02 |
| 3.42 | 18.83 | 18.64 | 18.34 | 18.02 | 17.64 | 17.37 | 17.11 | 16.81 | 16.44 | 16.21 | 15.94 |
| 3.47 | 19.14 | 18.79 | 18.49 | 18.17 | 17.86 | 17.54 | 17.18 | 16.85 | 16.63 | 16.32 | 16.13 |
| 3.52 | 19.28 | 19.00 | 18.72 | 18.37 | 18.02 | 17.73 | 17.44 | 17.03 | 16.76 | 16.54 | 16.25 |
| 3.57 | 19.02 | 18.71 | 18.41 | 18.09 | 17.74 | 17.43 | 17.12 | 16.75 | 16.54 | 16.26 | 15.97 |
| 3.62 | 19.58 | 19.32 | 18.97 | 18.59 | 18.37 | 18.00 | 17.62 | 17.33 | 17.05 | 16.71 | 16.52 |
| 3.67 | 19.80 | 19.41 | 19.13 | 18.85 | 18.52 | 18.16 | 17.77 | 17.50 | 17.20 | 16.89 | 16.62 |
| 3.72 | 20.44 | 20.12 | 19.78 | 19.36 | 19.10 | 18.72 | 18.39 | 18.02 | 17.75 | 17.42 | 17.17 |
| 3.92 | 19.60 | 19.28 | 18.99 | 18.57 | 18.33 | 17.90 | 17.56 | 17.24 | 16.92 | 16.62 | 16.35 |
| 4.12 | 20.41 | 20.13 | 19.72 | 19.34 | 19.07 | 18.69 | 18.33 | 18.01 | 17.66 | 17.34 | 17.03 |
| 4.32 | 20.81 | 20.49 | 20.14 | 19.72 | 19.31 | 18.99 | 18.57 | 18.25 | 17.91 | 17.54 | 17.27 |
| 4.52 | 21.51 | 21.20 | 20.86 | 20.51 | 20.12 | 19.67 | 19.26 | 18.93 | 18.57 | 18.21 | 17.90 |
| 4.72 | 21.70 | 21.36 | 20.97 | 20.57 | 20.28 | 19.83 | 19.44 | 19.10 | 18.78 | 18.37 | 18.02 |
| 4.92 | 21.49 | 21.15 | 20.79 | 20.38 | 19.97 | 19.64 | 19.25 | 18.77 | 18.45 | 18.09 | 17.75 |
| 5.12 | 21.85 | 21.50 | 21.15 | 20.72 | 20.35 | 19.92 | 19.54 | 19.11 | 18.78 | 18.40 | 18.05 |
| 5.32 | 22.11 | 21.74 | 21.38 | 20.98 | 20.54 | 20.21 | 19.75 | 19.29 | 18.95 | 18.59 | 18.29 |
| 5.52 | 22.01 | 21.61 | 21.18 | 20.87 | 20.44 | 20.02 | 19.57 | 19.20 | 18.82 | 18.45 | 18.15 |
| 5.72 | 22.18 | 21.78 | 21.39 | 21.03 | 20.60 | 20.15 | 19.73 | 19.32 | 18.98 | 18.56 | 18.15 |
| 5.92 | 22.52 | 22.09 | 21.76 | 21.34 | 20.93 | 20.51 | 20.17 | 19.67 | 19.31 | 18.93 | 18.53 |
| 6.12 | 22.07 | 21.74 | 21.34 | 20.89 | 20.55 | 20.10 | 19.65 | 19.26 | 18.83 | 18.45 | 18.11 |
| 6.32 | 22.09 | 21.76 | 21.32 | 20.85 | 20.49 | 20.06 | 19.64 | 19.20 | 18.79 | 18.46 | 18.08 |
| 6.52 | 22.52 | 22.08 | 21.69 | 21.29 | 20.85 | 20.42 | 20.03 | 19.60 | 19.22 | 18.79 | 18.43 |
| 6.72 | 22.67 | 22.33 | 21.91 | 21.47 | 21.04 | 20.59 | 20.12 | 19.74 | 19.33 | 18.89 | 18.48 |
| 6.92 | 22.28 | 21.92 | 21.55 | 21.14 | 20.75 | 20.36 | 19.91 | 19.46 | 19.11 | 18.70 | 18.33 |
| 7.12 | 22.34 | 21.92 | 21.52 | 21.15 | 20.72 | 20.25 | 19.85 | 19.49 | 19.00 | 18.58 | 18.25 |
| 7.32 | 22.91 | 22.45 | 22.10 | 21.73 | 21.23 | 20.88 | 20.36 | 19.97 | 19.52 | 19.16 | 18.75 |
| 7.52 | 22.39 | 22.02 | 21.62 | 21.18 | 20.75 | 20.35 | 19.93 | 19.45 | 19.00 | 18.68 | 18.25 |
| 7.72 | 22.32 | 22.00 | 21.58 | 21.11 | 20.71 | 20.24 | 19.76 | 19.34 | 18.88 | 18.51 | 18.13 |
| 7.92 | 22.96 | 22.47 | 22.07 | 21.62 | 21.22 | 20.86 | 20.36 | 19.81 | 19.45 | 19.07 | 18.65 |
| 8.12 | 22.66 | 22.28 | 21.89 | 21.52 | 21.01 | 20.64 | 20.20 | 19.70 | 19.32 | 18.94 | 18.57 |
| 8.32 | 22.81 | 22.39 | 21.94 | 21.60 | 21.08 | 20.63 | 20.22 | 19.72 | 19.29 | 18.83 | 18.58 |
| 8.52 | 22.73 | 22.22 | 21.92 | 21.44 | 21.07 | 20.56 | 20.13 | 19.67 | 19.20 | 18.84 | 18.37 |
| 8.72 | 22.69 | 22.32 | 21.87 | 21.44 | 21.03 | 20.56 | 20.11 | 19.64 | 19.28 | 18.84 | 18.46 |
| 8.92 | 22.90 | 22.55 | 22.06 | 21.60 | 21.15 | 20.75 | 20.34 | 19.80 | 19.36 | 18.91 | 18.51 |
| 9.12 | 23.04 | 22.68 | 22.25 | 21.86 | 21.43 | 21.02 | 20.51 | 20.06 | 19.61 | 19.20 | 18.82 |
| 9.32 | 23.07 | 22.71 | 22.36 | 21.90 | 21.45 | 20.93 | 20.51 | 20.00 | 19.58 | 19.15 | 18.70 |

|       |       |       |       |       |       |       |       |       |       |       |       |
|-------|-------|-------|-------|-------|-------|-------|-------|-------|-------|-------|-------|
| 9.52  | 23.49 | 23.14 | 22.78 | 22.22 | 21.80 | 21.34 | 20.82 | 20.33 | 20.00 | 19.58 | 19.14 |
| 9.72  | 23.23 | 22.80 | 22.41 | 21.93 | 21.49 | 21.02 | 20.52 | 20.06 | 19.62 | 19.19 | 18.76 |
| 9.92  | 23.21 | 22.80 | 22.40 | 21.94 | 21.47 | 21.06 | 20.55 | 20.05 | 19.61 | 19.21 | 18.85 |
| 10.12 | 22.95 | 22.50 | 22.17 | 21.73 | 21.24 | 20.84 | 20.34 | 19.89 | 19.46 | 19.03 | 18.69 |
| 10.32 | 23.09 | 22.68 | 22.31 | 21.86 | 21.44 | 21.02 | 20.52 | 20.09 | 19.66 | 19.24 | 18.86 |
| 10.52 | 22.86 | 22.45 | 21.97 | 21.60 | 21.14 | 20.68 | 20.20 | 19.73 | 19.29 | 18.85 | 18.41 |
| 10.72 | 22.64 | 22.22 | 21.81 | 21.35 | 20.94 | 20.43 | 20.05 | 19.49 | 19.09 | 18.72 | 18.29 |
| 10.92 | 23.16 | 22.72 | 22.32 | 21.94 | 21.42 | 20.96 | 20.57 | 20.06 | 19.75 | 19.25 | 18.76 |
| 11.12 | 22.97 | 22.56 | 22.17 | 21.68 | 21.28 | 20.77 | 20.37 | 19.83 | 19.38 | 18.99 | 18.58 |
| 11.32 | 22.92 | 22.51 | 22.18 | 21.72 | 21.29 | 20.84 | 20.36 | 19.83 | 19.43 | 19.01 | 18.59 |
| 11.52 | 23.00 | 22.61 | 22.19 | 21.78 | 21.30 | 20.82 | 20.34 | 19.95 | 19.48 | 19.11 | 18.63 |
| 11.72 | 22.62 | 22.16 | 21.83 | 21.34 | 20.94 | 20.51 | 20.03 | 19.55 | 19.15 | 18.63 | 18.25 |
| 11.92 | 22.11 | 21.74 | 21.31 | 20.85 | 20.45 | 19.99 | 19.57 | 19.06 | 18.65 | 18.22 | 17.87 |
| 12.12 | 22.44 | 22.07 | 21.61 | 21.15 | 20.75 | 20.29 | 19.83 | 19.39 | 18.95 | 18.51 | 18.11 |
| 12.32 | 22.96 | 22.58 | 22.12 | 21.74 | 21.26 | 20.74 | 20.31 | 19.83 | 19.35 | 18.95 | 18.54 |
| 12.52 | 23.63 | 23.25 | 22.88 | 22.33 | 21.94 | 21.47 | 21.02 | 20.52 | 20.10 | 19.63 | 19.16 |
| 12.72 | 23.28 | 22.83 | 22.42 | 21.95 | 21.47 | 21.01 | 20.49 | 20.07 | 19.62 | 19.14 | 18.69 |
| 12.92 | 23.10 | 22.65 | 22.22 | 21.82 | 21.30 | 20.93 | 20.45 | 19.99 | 19.52 | 19.07 | 18.62 |
| 13.12 | 23.04 | 22.62 | 22.19 | 21.75 | 21.29 | 20.78 | 20.34 | 19.89 | 19.44 | 18.97 | 18.55 |
| 13.32 | 23.31 | 22.85 | 22.40 | 21.98 | 21.50 | 21.05 | 20.57 | 20.07 | 19.64 | 19.16 | 18.68 |
| 13.52 | 23.37 | 23.04 | 22.51 | 22.08 | 21.69 | 21.26 | 20.69 | 20.29 | 19.78 | 19.37 | 18.98 |
| 13.72 | 23.74 | 23.33 | 22.92 | 22.48 | 22.03 | 21.60 | 21.05 | 20.57 | 20.19 | 19.67 | 19.27 |
| 13.92 | 23.60 | 23.13 | 22.72 | 22.25 | 21.82 | 21.31 | 20.87 | 20.37 | 19.93 | 19.49 | 19.02 |
| 14    | 22.79 | 22.33 | 21.97 | 21.51 | 21.01 | 20.55 | 20.09 | 19.61 | 19.18 | 18.71 | 18.31 |
| 14.08 | 22.86 | 22.49 | 22.07 | 21.61 | 21.16 | 20.71 | 20.16 | 19.74 | 19.31 | 18.87 | 18.52 |
| 14.17 | 22.86 | 22.50 | 22.08 | 21.59 | 21.13 | 20.67 | 20.29 | 19.73 | 19.29 | 18.92 | 18.46 |
| 14.27 | 23.29 | 22.87 | 22.42 | 21.98 | 21.53 | 21.06 | 20.57 | 20.09 | 19.66 | 19.27 | 18.75 |
| 14.38 | 23.25 | 22.83 | 22.37 | 21.88 | 21.48 | 21.09 | 20.60 | 20.06 | 19.58 | 19.12 | 18.72 |
| 14.49 | 22.77 | 22.38 | 22.01 | 21.55 | 21.15 | 20.64 | 20.14 | 19.73 | 19.26 | 18.86 | 18.46 |
| 14.61 | 23.14 | 22.76 | 22.33 | 21.89 | 21.43 | 20.88 | 20.43 | 19.89 | 19.49 | 19.03 | 18.63 |
| 14.75 | 23.34 | 22.90 | 22.46 | 22.01 | 21.50 | 21.07 | 20.59 | 20.03 | 19.65 | 19.14 | 18.73 |
| 14.89 | 23.22 | 22.85 | 22.50 | 21.98 | 21.52 | 21.11 | 20.63 | 20.14 | 19.71 | 19.25 | 18.79 |
| 15.05 | 23.87 | 23.51 | 23.09 | 22.60 | 22.15 | 21.63 | 21.21 | 20.69 | 20.20 | 19.77 | 19.32 |
| 15.21 | 23.13 | 22.67 | 22.30 | 21.91 | 21.38 | 20.89 | 20.39 | 19.95 | 19.47 | 19.00 | 18.62 |
| 15.39 | 23.06 | 22.60 | 22.19 | 21.74 | 21.24 | 20.77 | 20.31 | 19.84 | 19.38 | 18.90 | 18.44 |
| 15.59 | 23.20 | 22.75 | 22.36 | 21.92 | 21.35 | 21.02 | 20.50 | 20.00 | 19.54 | 19.05 | 18.72 |
| 15.8  | 22.72 | 22.30 | 21.88 | 21.43 | 21.05 | 20.53 | 20.10 | 19.61 | 19.17 | 18.70 | 18.30 |
| 16.02 | 23.08 | 22.61 | 22.24 | 21.79 | 21.36 | 20.93 | 20.36 | 19.92 | 19.48 | 19.06 | 18.59 |
| 16.27 | 23.74 | 23.33 | 22.95 | 22.43 | 22.02 | 21.51 | 21.03 | 20.57 | 20.06 | 19.60 | 19.19 |
| 16.53 | 23.37 | 22.94 | 22.55 | 22.06 | 21.61 | 21.18 | 20.64 | 20.18 | 19.67 | 19.27 | 18.82 |
| 16.81 | 23.40 | 22.96 | 22.52 | 22.16 | 21.66 | 21.14 | 20.65 | 20.18 | 19.71 | 19.29 | 18.82 |
| 17.12 | 23.13 | 22.71 | 22.28 | 21.80 | 21.35 | 20.84 | 20.37 | 19.86 | 19.44 | 18.97 | 18.55 |
| 17.45 | 23.44 | 23.06 | 22.58 | 22.11 | 21.69 | 21.16 | 20.72 | 20.17 | 19.80 | 19.24 | 18.84 |
| 17.81 | 23.77 | 23.33 | 22.96 | 22.54 | 22.03 | 21.55 | 21.10 | 20.64 | 20.11 | 19.70 | 19.31 |
| 18.19 | 23.74 | 23.25 | 22.84 | 22.41 | 21.93 | 21.46 | 20.97 | 20.48 | 19.94 | 19.58 | 19.12 |
| 18.6  | 23.07 | 22.67 | 22.25 | 21.78 | 21.29 | 20.89 | 20.39 | 19.84 | 19.46 | 19.03 | 18.51 |
| 19.05 | 23.37 | 22.95 | 22.55 | 22.05 | 21.51 | 21.08 | 20.56 | 20.03 | 19.63 | 19.17 | 18.69 |
| 19.53 | 23.84 | 23.43 | 23.04 | 22.49 | 21.97 | 21.58 | 21.04 | 20.53 | 20.11 | 19.58 | 19.20 |
| 20.05 | 23.22 | 22.75 | 22.38 | 21.90 | 21.48 | 21.01 | 20.50 | 20.07 | 19.59 | 19.06 | 18.65 |
| 20.61 | 23.79 | 23.31 | 22.84 | 22.40 | 21.94 | 21.42 | 20.96 | 20.49 | 20.02 | 19.49 | 19.08 |

|        |       |       |       |       |       |       |       |       |       |       |       |
|--------|-------|-------|-------|-------|-------|-------|-------|-------|-------|-------|-------|
| 21.22  | 23.40 | 22.94 | 22.48 | 22.04 | 21.59 | 21.11 | 20.57 | 20.09 | 19.62 | 19.19 | 18.70 |
| 21.87  | 23.32 | 22.84 | 22.45 | 21.99 | 21.55 | 20.99 | 20.47 | 20.04 | 19.52 | 19.07 | 18.64 |
| 22.57  | 23.77 | 23.26 | 22.83 | 22.37 | 21.92 | 21.43 | 21.00 | 20.43 | 19.97 | 19.53 | 19.07 |
| 23.33  | 23.50 | 23.12 | 22.69 | 22.21 | 21.77 | 21.31 | 20.73 | 20.32 | 19.81 | 19.41 | 18.94 |
| 24.15  | 24.00 | 23.55 | 23.15 | 22.67 | 22.23 | 21.77 | 21.28 | 20.79 | 20.27 | 19.87 | 19.36 |
| 25.03  | 23.99 | 23.56 | 23.10 | 22.64 | 22.21 | 21.67 | 21.21 | 20.73 | 20.21 | 19.76 | 19.33 |
| 25.98  | 23.37 | 22.93 | 22.48 | 22.04 | 21.65 | 21.17 | 20.68 | 20.14 | 19.67 | 19.28 | 18.81 |
| 27.01  | 23.48 | 23.10 | 22.75 | 22.20 | 21.70 | 21.18 | 20.72 | 20.18 | 19.74 | 19.28 | 18.86 |
| 28.11  | 23.58 | 23.13 | 22.72 | 22.28 | 21.79 | 21.28 | 20.84 | 20.28 | 19.89 | 19.36 | 18.92 |
| 29.3   | 24.02 | 23.59 | 23.22 | 22.69 | 22.25 | 21.71 | 21.27 | 20.72 | 20.27 | 19.82 | 19.32 |
| 30.59  | 23.45 | 23.07 | 22.70 | 22.20 | 21.74 | 21.33 | 20.84 | 20.35 | 19.84 | 19.42 | 18.99 |
| 31.98  | 23.99 | 23.56 | 23.09 | 22.62 | 22.12 | 21.70 | 21.20 | 20.67 | 20.21 | 19.74 | 19.23 |
| 33.47  | 24.14 | 23.71 | 23.28 | 22.83 | 22.38 | 21.98 | 21.45 | 20.91 | 20.46 | 20.05 | 19.54 |
| 35.09  | 24.28 | 23.84 | 23.39 | 22.92 | 22.47 | 22.05 | 21.47 | 21.00 | 20.47 | 20.03 | 19.57 |
| 36.83  | 24.53 | 24.05 | 23.66 | 23.23 | 22.76 | 22.26 | 21.75 | 21.30 | 20.73 | 20.31 | 19.85 |
| 38.71  | 24.61 | 24.27 | 23.81 | 23.28 | 22.84 | 22.45 | 21.95 | 21.42 | 20.91 | 20.52 | 20.08 |
| 40.73  | 24.74 | 24.31 | 23.87 | 23.37 | 22.88 | 22.49 | 21.99 | 21.46 | 20.98 | 20.54 | 20.01 |
| 42.92  | 25.69 | 25.27 | 24.81 | 24.39 | 23.84 | 23.39 | 22.88 | 22.36 | 21.87 | 21.34 | 20.93 |
| 45.27  | 24.65 | 24.23 | 23.89 | 23.44 | 22.87 | 22.44 | 21.89 | 21.45 | 20.96 | 20.49 | 20.00 |
| 47.81  | 25.09 | 24.76 | 24.33 | 23.79 | 23.36 | 22.84 | 22.33 | 21.80 | 21.36 | 20.83 | 20.36 |
| 50.55  | 25.01 | 24.58 | 24.15 | 23.74 | 23.23 | 22.77 | 22.28 | 21.76 | 21.31 | 20.79 | 20.45 |
| 53.51  | 25.17 | 24.84 | 24.39 | 23.95 | 23.45 | 23.03 | 22.52 | 22.00 | 21.56 | 21.09 | 20.55 |
| 56.69  | 25.90 | 25.43 | 25.05 | 24.60 | 24.06 | 23.61 | 23.10 | 22.56 | 22.06 | 21.55 | 21.13 |
| 60.13  | 25.44 | 25.09 | 24.64 | 24.26 | 23.78 | 23.30 | 22.85 | 22.35 | 21.87 | 21.34 | 20.92 |
| 63.84  | 25.89 | 25.50 | 25.05 | 24.61 | 24.15 | 23.71 | 23.21 | 22.68 | 22.21 | 21.67 | 21.20 |
| 67.83  | 26.24 | 25.81 | 25.43 | 24.99 | 24.47 | 24.05 | 23.54 | 22.97 | 22.51 | 22.00 | 21.59 |
| 72.15  | 26.22 | 25.77 | 25.43 | 24.98 | 24.56 | 24.06 | 23.47 | 23.05 | 22.62 | 22.12 | 21.63 |
| 76.8   | 26.12 | 25.76 | 25.40 | 24.86 | 24.44 | 24.03 | 23.50 | 23.02 | 22.53 | 22.06 | 21.55 |
| 81.81  | 26.50 | 26.19 | 25.75 | 25.31 | 24.90 | 24.38 | 23.85 | 23.32 | 22.84 | 22.44 | 21.86 |
| 87.22  | 26.64 | 26.24 | 25.87 | 25.40 | 24.98 | 24.46 | 24.02 | 23.49 | 23.05 | 22.48 | 22.01 |
| 93.06  | 27.65 | 27.23 | 26.82 | 26.36 | 25.95 | 25.37 | 24.92 | 24.40 | 23.94 | 23.38 | 22.94 |
| 99.35  | 28.33 | 27.97 | 27.60 | 27.15 | 26.72 | 26.20 | 25.72 | 25.19 | 24.71 | 24.18 | 23.71 |
| 106.13 | 27.80 | 27.43 | 27.06 | 26.60 | 26.22 | 25.76 | 25.19 | 24.75 | 24.26 | 23.78 | 23.31 |
| 113.45 | 28.30 | 27.92 | 27.53 | 27.08 | 26.64 | 26.14 | 25.75 | 25.22 | 24.70 | 24.19 | 23.75 |
| 121.34 | 27.87 | 27.50 | 27.07 | 26.65 | 26.18 | 25.77 | 25.26 | 24.80 | 24.32 | 23.76 | 23.35 |
| 129.86 | 28.69 | 28.33 | 27.91 | 27.49 | 27.12 | 26.58 | 26.12 | 25.62 | 25.06 | 24.63 | 24.10 |
| 139.04 | 29.78 | 29.36 | 28.98 | 28.56 | 28.11 | 27.71 | 27.15 | 26.65 | 26.16 | 25.63 | 25.18 |
| 148.94 | 30.14 | 29.77 | 29.45 | 29.04 | 28.50 | 28.12 | 27.52 | 27.06 | 26.61 | 26.11 | 25.57 |
| 159.62 | 29.84 | 29.48 | 29.05 | 28.68 | 28.27 | 27.79 | 27.28 | 26.78 | 26.31 | 25.85 | 25.31 |
| 171.14 | 30.15 | 29.89 | 29.44 | 29.04 | 28.60 | 28.15 | 27.70 | 27.19 | 26.68 | 26.21 | 25.70 |
| 183.56 | 30.24 | 29.92 | 29.57 | 29.05 | 28.72 | 28.30 | 27.77 | 27.27 | 26.80 | 26.33 | 25.80 |
| 196.96 | 31.43 | 31.07 | 30.74 | 30.32 | 29.85 | 29.44 | 28.97 | 28.40 | 27.93 | 27.38 | 26.90 |
| 211.41 | 31.90 | 31.54 | 31.22 | 30.85 | 30.41 | 29.95 | 29.50 | 28.91 | 28.43 | 27.96 | 27.38 |
| 226.99 | 33.08 | 32.74 | 32.41 | 32.01 | 31.59 | 31.20 | 30.67 | 30.11 | 29.67 | 29.13 | 28.60 |
| 243.8  | 32.57 | 32.29 | 31.92 | 31.58 | 31.15 | 30.70 | 30.23 | 29.79 | 29.18 | 28.68 | 28.24 |
| 261.93 | 33.55 | 33.24 | 32.89 | 32.52 | 32.09 | 31.67 | 31.20 | 30.63 | 30.22 | 29.68 | 29.21 |
| 281.48 | 33.93 | 33.61 | 33.20 | 32.84 | 32.52 | 31.98 | 31.52 | 31.01 | 30.50 | 29.99 | 29.49 |
| 302.56 | 34.76 | 34.40 | 34.12 | 33.68 | 33.33 | 32.86 | 32.38 | 31.81 | 31.28 | 30.80 | 30.24 |
| 325.3  | 34.95 | 34.71 | 34.35 | 33.95 | 33.57 | 33.09 | 32.70 | 32.20 | 31.59 | 31.17 | 30.65 |
| 349.83 | 34.48 | 34.19 | 33.95 | 33.51 | 33.16 | 32.74 | 32.25 | 31.80 | 31.29 | 30.78 | 30.31 |

|         |       |       |       |       |       |       |       |       |       |       |       |
|---------|-------|-------|-------|-------|-------|-------|-------|-------|-------|-------|-------|
| 376.28  | 36.06 | 35.81 | 35.43 | 35.08 | 34.69 | 34.19 | 33.80 | 33.26 | 32.78 | 32.23 | 31.72 |
| 404.81  | 36.02 | 35.77 | 35.50 | 35.14 | 34.78 | 34.29 | 33.80 | 33.35 | 32.86 | 32.32 | 31.84 |
| 435.58  | 36.85 | 36.63 | 36.27 | 35.94 | 35.53 | 35.07 | 34.61 | 34.10 | 33.56 | 33.08 | 32.50 |
| 468.76  | 37.79 | 37.45 | 37.17 | 36.85 | 36.48 | 35.94 | 35.58 | 35.07 | 34.49 | 34.01 | 33.47 |
| 504.55  | 38.00 | 37.80 | 37.48 | 37.17 | 36.85 | 36.36 | 35.91 | 35.46 | 34.94 | 34.36 | 33.89 |
| 543.15  | 38.32 | 37.98 | 37.73 | 37.37 | 37.02 | 36.64 | 36.15 | 35.63 | 35.14 | 34.64 | 34.05 |
| 584.78  | 38.84 | 38.57 | 38.24 | 37.95 | 37.56 | 37.14 | 36.70 | 36.16 | 35.70 | 35.11 | 34.67 |
| 629.68  | 39.47 | 39.26 | 39.00 | 38.64 | 38.33 | 37.87 | 37.45 | 36.90 | 36.47 | 35.84 | 35.35 |
| 678.1   | 39.47 | 39.23 | 38.99 | 38.66 | 38.34 | 37.84 | 37.43 | 36.93 | 36.46 | 35.90 | 35.38 |
| 730.33  | 40.13 | 39.84 | 39.62 | 39.25 | 38.94 | 38.54 | 38.03 | 37.55 | 37.13 | 36.55 | 35.94 |
| 786.65  | 40.07 | 39.89 | 39.61 | 39.30 | 38.96 | 38.57 | 38.13 | 37.66 | 37.14 | 36.57 | 36.05 |
| 847.4   | 40.90 | 40.65 | 40.42 | 40.08 | 39.74 | 39.29 | 38.89 | 38.36 | 37.83 | 37.27 | 36.75 |
| 912.92  | 40.50 | 40.30 | 40.03 | 39.73 | 39.42 | 39.04 | 38.56 | 38.07 | 37.58 | 37.03 | 36.48 |
| 983.58  | 40.38 | 40.14 | 39.87 | 39.60 | 39.25 | 38.85 | 38.43 | 37.90 | 37.35 | 36.87 | 36.28 |
| 1059.78 | 40.63 | 40.50 | 40.26 | 39.91 | 39.55 | 39.18 | 38.77 | 38.21 | 37.76 | 37.23 | 36.64 |
| 1141.98 | 40.32 | 40.13 | 39.90 | 39.62 | 39.24 | 38.88 | 38.49 | 37.95 | 37.53 | 36.94 | 36.40 |
| 1230.62 | 40.95 | 40.71 | 40.50 | 40.16 | 39.87 | 39.46 | 39.10 | 38.55 | 38.10 | 37.45 | 36.96 |
| 1326.23 | 41.67 | 41.43 | 41.24 | 40.94 | 40.57 | 40.14 | 39.78 | 39.23 | 38.73 | 38.17 | 37.60 |
| 1429.34 | 41.76 | 41.57 | 41.34 | 41.02 | 40.73 | 40.33 | 39.86 | 39.36 | 38.86 | 38.25 | 37.75 |
| 1540.54 | 41.61 | 41.41 | 41.17 | 40.90 | 40.61 | 40.20 | 39.68 | 39.20 | 38.64 | 38.08 | 37.57 |
| 1660.48 | 42.07 | 41.85 | 41.72 | 41.33 | 41.00 | 40.59 | 40.12 | 39.59 | 39.14 | 38.60 | 38.02 |
| 1789.83 | 42.12 | 41.88 | 41.67 | 41.38 | 41.00 | 40.60 | 40.18 | 39.68 | 39.17 | 38.65 | 38.03 |
| 1929.34 | 42.74 | 42.43 | 42.23 | 41.97 | 41.48 | 41.15 | 40.64 | 40.17 | 39.63 | 39.12 | 38.48 |
| 2079.8  | 41.38 | 41.15 | 41.00 | 40.65 | 40.40 | 40.02 | 39.56 | 39.07 | 38.50 | 38.02 | 37.45 |
| 2242.08 | 42.56 | 42.29 | 42.08 | 41.76 | 41.42 | 41.03 | 40.62 | 40.07 | 39.54 | 39.03 | 38.41 |
| 2417.1  | 41.94 | 41.76 | 41.49 | 41.17 | 40.79 | 40.47 | 39.94 | 39.44 | 38.98 | 38.41 | 37.76 |
| 2605.85 | 41.69 | 41.47 | 41.25 | 40.97 | 40.62 | 40.21 | 39.84 | 39.33 | 38.84 | 38.27 | 37.69 |
| 2809.43 | 41.62 | 41.39 | 41.17 | 40.84 | 40.54 | 40.18 | 39.67 | 39.24 | 38.73 | 38.11 | 37.57 |
| 3028.99 | 40.52 | 40.33 | 40.06 | 39.73 | 39.43 | 39.05 | 38.58 | 38.10 | 37.63 | 37.09 | 36.54 |
| 3265.79 | 40.87 | 40.63 | 40.44 | 40.13 | 39.80 | 39.46 | 38.98 | 38.51 | 37.98 | 37.42 | 36.86 |
| 3521.18 | 40.86 | 40.66 | 40.43 | 40.10 | 39.78 | 39.37 | 38.94 | 38.44 | 37.97 | 37.34 | 36.81 |
| 3796.62 | 41.31 | 41.13 | 40.85 | 40.62 | 40.24 | 39.86 | 39.42 | 38.91 | 38.40 | 37.89 | 37.32 |

| Wavelength (nm) \ Time (ps) | 599.60 | 601.00 | 602.41 | 603.82 | 605.23 | 606.64 | 608.05 | 609.46 | 610.86 | 612.27 | 613.68 |
|-----------------------------|--------|--------|--------|--------|--------|--------|--------|--------|--------|--------|--------|
| -3.28                       | 0.12   | 0.12   | 0.11   | 0.10   | 0.11   | 0.11   | 0.11   | 0.10   | 0.08   | 0.14   | 0.12   |
| -2.78                       | -0.02  | 0.02   | 0.04   | 0.00   | 0.00   | -0.03  | 0.01   | -0.03  | 0.01   | -0.02  | 0.01   |
| -2.28                       | 0.08   | 0.07   | 0.05   | 0.04   | 0.06   | 0.07   | 0.04   | 0.06   | 0.03   | 0.00   | 0.01   |
| -1.78                       | 0.12   | 0.12   | 0.10   | 0.13   | 0.15   | 0.16   | 0.14   | 0.12   | 0.15   | 0.16   | 0.09   |
| -1.28                       | 0.00   | 0.02   | 0.03   | 0.06   | 0.02   | 0.06   | 0.05   | 0.06   | 0.02   | 0.10   | 0.07   |
| -0.78                       | -0.04  | -0.09  | -0.04  | -0.05  | -0.06  | -0.07  | -0.07  | -0.12  | -0.07  | -0.12  | -0.09  |
| -0.28                       | -0.33  | -0.36  | -0.35  | -0.38  | -0.36  | -0.38  | -0.34  | -0.22  | -0.30  | -0.30  | -0.25  |
| 0.22                        | 0.06   | 0.11   | 0.06   | 0.10   | 0.08   | 0.08   | 0.06   | 0.03   | 0.08   | 0.04   | 0.04   |
| 0.32                        | 0.35   | 0.35   | 0.37   | 0.35   | 0.32   | 0.28   | 0.26   | 0.32   | 0.24   | 0.23   | 0.26   |
| 0.42                        | 0.18   | 0.16   | 0.21   | 0.24   | 0.19   | 0.22   | 0.20   | 0.18   | 0.23   | 0.21   | 0.21   |
| 0.52                        | -0.23  | -0.17  | -0.12  | -0.08  | -0.13  | -0.15  | -0.06  | -0.10  | -0.04  | -0.09  | -0.09  |
| 0.62                        | 0.00   | -0.02  | -0.02  | 0.02   | 0.03   | 0.03   | 0.03   | -0.04  | 0.05   | 0.03   | -0.01  |
| 0.72                        | 0.03   | -0.03  | -0.04  | 0.05   | -0.02  | 0.01   | 0.07   | 0.03   | 0.09   | 0.12   | 0.04   |



|      |       |       |       |       |       |       |       |       |       |       |       |
|------|-------|-------|-------|-------|-------|-------|-------|-------|-------|-------|-------|
| 0.77 | 0.23  | 0.28  | 0.24  | 0.28  | 0.26  | 0.29  | 0.31  | 0.22  | 0.25  | 0.27  | 0.28  |
| 0.82 | -0.16 | -0.10 | -0.03 | -0.06 | -0.09 | -0.16 | -0.09 | -0.08 | -0.06 | -0.05 | -0.09 |
| 0.87 | -0.24 | -0.29 | -0.28 | -0.18 | -0.27 | -0.23 | -0.24 | -0.22 | -0.23 | -0.21 | -0.20 |
| 0.92 | -0.01 | 0.02  | 0.05  | 0.01  | -0.01 | 0.04  | 0.06  | 0.04  | 0.15  | 0.13  | 0.10  |
| 0.97 | 0.26  | 0.26  | 0.26  | 0.26  | 0.28  | 0.23  | 0.23  | 0.25  | 0.29  | 0.31  | 0.29  |
| 1.02 | 0.18  | 0.22  | 0.22  | 0.20  | 0.21  | 0.16  | 0.19  | 0.19  | 0.14  | 0.14  | 0.14  |
| 1.07 | 0.02  | 0.05  | 0.06  | 0.05  | 0.03  | 0.08  | 0.01  | 0.05  | 0.14  | 0.08  | 0.12  |
| 1.12 | -0.11 | -0.13 | -0.14 | -0.10 | -0.17 | -0.15 | -0.06 | -0.11 | -0.10 | -0.14 | -0.10 |
| 1.17 | 0.03  | 0.05  | 0.02  | 0.12  | 0.10  | 0.09  | 0.12  | 0.15  | 0.15  | 0.21  | 0.17  |
| 1.22 | 0.25  | 0.29  | 0.24  | 0.28  | 0.25  | 0.25  | 0.25  | 0.22  | 0.22  | 0.21  | 0.16  |
| 1.27 | 0.13  | 0.15  | 0.20  | 0.17  | 0.19  | 0.12  | 0.12  | 0.15  | 0.11  | 0.13  | 0.12  |
| 1.32 | -0.01 | 0.01  | 0.06  | 0.01  | 0.01  | 0.07  | -0.01 | -0.05 | 0.00  | 0.01  | 0.01  |
| 1.37 | 0.06  | 0.11  | 0.13  | 0.10  | 0.12  | 0.03  | 0.08  | 0.08  | 0.10  | 0.16  | 0.15  |
| 1.42 | 0.16  | 0.17  | 0.19  | 0.23  | 0.16  | 0.21  | 0.13  | 0.21  | 0.19  | 0.24  | 0.20  |
| 1.47 | 0.01  | 0.06  | 0.05  | 0.12  | 0.17  | 0.18  | 0.17  | 0.14  | 0.15  | 0.15  | 0.12  |
| 1.52 | 0.34  | 0.35  | 0.28  | 0.33  | 0.30  | 0.29  | 0.26  | 0.20  | 0.24  | 0.20  | 0.12  |
| 1.57 | 4.04  | 3.76  | 3.55  | 3.34  | 3.20  | 3.00  | 2.84  | 2.72  | 2.61  | 2.46  | 2.42  |
| 1.62 | 12.11 | 11.64 | 11.28 | 10.88 | 10.61 | 10.33 | 10.02 | 9.80  | 9.67  | 9.43  | 9.30  |
| 1.67 | 19.31 | 19.20 | 19.19 | 19.09 | 18.99 | 18.95 | 18.93 | 18.98 | 18.97 | 18.99 | 19.01 |
| 1.72 | 18.26 | 18.38 | 18.49 | 18.64 | 18.85 | 18.96 | 19.20 | 19.37 | 19.60 | 19.77 | 19.97 |
| 1.77 | 15.90 | 16.08 | 16.13 | 16.29 | 16.49 | 16.63 | 16.80 | 16.98 | 17.23 | 17.43 | 17.64 |
| 1.82 | 14.07 | 14.19 | 14.31 | 14.48 | 14.54 | 14.75 | 14.95 | 15.06 | 15.31 | 15.50 | 15.73 |
| 1.87 | 12.86 | 12.93 | 12.96 | 13.08 | 13.22 | 13.35 | 13.51 | 13.57 | 13.79 | 13.96 | 14.12 |
| 1.92 | 12.69 | 12.70 | 12.77 | 12.80 | 12.88 | 13.00 | 13.00 | 13.09 | 13.26 | 13.42 | 13.55 |
| 1.97 | 12.41 | 12.41 | 12.37 | 12.47 | 12.49 | 12.59 | 12.68 | 12.69 | 12.84 | 12.92 | 13.05 |
| 2.02 | 12.69 | 12.67 | 12.71 | 12.64 | 12.65 | 12.65 | 12.69 | 12.76 | 12.84 | 12.97 | 13.03 |
| 2.07 | 13.08 | 13.11 | 13.04 | 13.07 | 13.04 | 13.07 | 13.11 | 13.11 | 13.21 | 13.23 | 13.31 |
| 2.12 | 12.48 | 12.45 | 12.43 | 12.40 | 12.38 | 12.44 | 12.43 | 12.45 | 12.59 | 12.66 | 12.72 |
| 2.17 | 12.81 | 12.72 | 12.72 | 12.62 | 12.62 | 12.65 | 12.70 | 12.69 | 12.70 | 12.81 | 12.79 |
| 2.22 | 13.07 | 12.95 | 12.94 | 12.80 | 12.85 | 12.85 | 12.81 | 12.87 | 12.88 | 12.91 | 12.97 |
| 2.27 | 13.37 | 13.29 | 13.24 | 13.13 | 13.15 | 13.09 | 13.12 | 13.13 | 13.19 | 13.18 | 13.20 |
| 2.32 | 14.00 | 13.93 | 13.85 | 13.78 | 13.79 | 13.71 | 13.68 | 13.68 | 13.72 | 13.68 | 13.79 |
| 2.37 | 13.75 | 13.74 | 13.60 | 13.60 | 13.50 | 13.54 | 13.52 | 13.47 | 13.53 | 13.53 | 13.56 |
| 2.42 | 13.77 | 13.71 | 13.62 | 13.61 | 13.50 | 13.42 | 13.45 | 13.45 | 13.45 | 13.41 | 13.42 |
| 2.47 | 14.05 | 14.01 | 13.89 | 13.86 | 13.82 | 13.73 | 13.67 | 13.64 | 13.66 | 13.67 | 13.62 |
| 2.52 | 13.87 | 13.77 | 13.70 | 13.57 | 13.51 | 13.45 | 13.40 | 13.39 | 13.42 | 13.41 | 13.36 |
| 2.57 | 14.37 | 14.28 | 14.22 | 14.12 | 14.05 | 13.97 | 13.90 | 13.83 | 13.87 | 13.83 | 13.80 |
| 2.62 | 14.52 | 14.42 | 14.29 | 14.22 | 14.16 | 14.07 | 14.02 | 13.98 | 13.93 | 13.95 | 13.92 |
| 2.67 | 14.24 | 14.11 | 13.98 | 13.85 | 13.79 | 13.77 | 13.76 | 13.71 | 13.70 | 13.69 | 13.66 |
| 2.72 | 14.13 | 14.01 | 13.94 | 13.88 | 13.76 | 13.64 | 13.58 | 13.56 | 13.57 | 13.56 | 13.49 |
| 2.77 | 14.40 | 14.32 | 14.19 | 14.09 | 14.01 | 13.96 | 13.88 | 13.85 | 13.92 | 13.88 | 13.91 |
| 2.82 | 14.93 | 14.77 | 14.63 | 14.51 | 14.43 | 14.34 | 14.27 | 14.14 | 14.13 | 14.11 | 14.10 |
| 2.87 | 14.89 | 14.72 | 14.60 | 14.55 | 14.43 | 14.33 | 14.24 | 14.19 | 14.19 | 14.20 | 14.14 |
| 2.92 | 15.15 | 15.06 | 14.90 | 14.80 | 14.68 | 14.56 | 14.52 | 14.44 | 14.41 | 14.35 | 14.30 |
| 2.97 | 15.30 | 15.16 | 14.99 | 14.90 | 14.84 | 14.68 | 14.65 | 14.59 | 14.54 | 14.54 | 14.47 |
| 3.02 | 14.89 | 14.78 | 14.69 | 14.56 | 14.41 | 14.30 | 14.22 | 14.15 | 14.14 | 14.12 | 14.13 |
| 3.07 | 15.01 | 14.83 | 14.65 | 14.53 | 14.44 | 14.31 | 14.25 | 14.15 | 14.13 | 14.13 | 14.12 |
| 3.12 | 16.09 | 15.90 | 15.78 | 15.61 | 15.47 | 15.37 | 15.25 | 15.18 | 15.14 | 15.02 | 15.04 |
| 3.17 | 15.55 | 15.41 | 15.17 | 15.04 | 14.91 | 14.81 | 14.75 | 14.72 | 14.65 | 14.57 | 14.50 |
| 3.22 | 15.35 | 15.18 | 15.00 | 14.92 | 14.74 | 14.67 | 14.60 | 14.51 | 14.49 | 14.44 | 14.34 |

|       |       |       |       |       |       |       |       |       |       |       |       |
|-------|-------|-------|-------|-------|-------|-------|-------|-------|-------|-------|-------|
| 3.27  | 15.18 | 15.01 | 14.84 | 14.70 | 14.57 | 14.43 | 14.36 | 14.30 | 14.23 | 14.15 | 14.13 |
| 3.32  | 16.03 | 15.84 | 15.63 | 15.44 | 15.33 | 15.21 | 15.12 | 14.99 | 14.90 | 14.81 | 14.78 |
| 3.37  | 15.77 | 15.59 | 15.37 | 15.27 | 15.12 | 15.01 | 14.89 | 14.77 | 14.73 | 14.65 | 14.67 |
| 3.42  | 15.71 | 15.54 | 15.34 | 15.19 | 15.08 | 14.87 | 14.82 | 14.73 | 14.64 | 14.59 | 14.55 |
| 3.47  | 15.86 | 15.65 | 15.41 | 15.29 | 15.14 | 14.97 | 14.86 | 14.78 | 14.66 | 14.61 | 14.55 |
| 3.52  | 16.03 | 15.86 | 15.61 | 15.45 | 15.30 | 15.16 | 15.07 | 14.98 | 14.95 | 14.89 | 14.85 |
| 3.57  | 15.71 | 15.49 | 15.29 | 15.21 | 15.03 | 14.88 | 14.78 | 14.70 | 14.58 | 14.54 | 14.46 |
| 3.62  | 16.22 | 16.00 | 15.76 | 15.65 | 15.47 | 15.27 | 15.22 | 15.13 | 15.00 | 14.91 | 14.82 |
| 3.67  | 16.36 | 16.18 | 15.98 | 15.84 | 15.62 | 15.46 | 15.34 | 15.26 | 15.24 | 15.14 | 15.05 |
| 3.72  | 16.85 | 16.71 | 16.39 | 16.26 | 16.09 | 15.90 | 15.78 | 15.63 | 15.51 | 15.41 | 15.31 |
| 3.92  | 16.11 | 15.85 | 15.60 | 15.44 | 15.30 | 15.08 | 14.97 | 14.87 | 14.81 | 14.73 | 14.65 |
| 4.12  | 16.76 | 16.54 | 16.25 | 16.09 | 15.94 | 15.67 | 15.58 | 15.46 | 15.36 | 15.25 | 15.11 |
| 4.32  | 16.94 | 16.68 | 16.40 | 16.27 | 16.02 | 15.89 | 15.67 | 15.53 | 15.44 | 15.38 | 15.25 |
| 4.52  | 17.55 | 17.37 | 17.02 | 16.83 | 16.65 | 16.43 | 16.32 | 16.12 | 16.04 | 15.85 | 15.78 |
| 4.72  | 17.64 | 17.45 | 17.20 | 17.00 | 16.79 | 16.59 | 16.38 | 16.18 | 16.09 | 15.94 | 15.81 |
| 4.92  | 17.46 | 17.16 | 16.89 | 16.65 | 16.42 | 16.23 | 16.06 | 15.91 | 15.82 | 15.65 | 15.56 |
| 5.12  | 17.72 | 17.45 | 17.13 | 16.95 | 16.70 | 16.47 | 16.29 | 16.09 | 16.01 | 15.88 | 15.76 |
| 5.32  | 17.99 | 17.63 | 17.42 | 17.08 | 16.87 | 16.68 | 16.44 | 16.30 | 16.22 | 16.07 | 15.97 |
| 5.52  | 17.76 | 17.43 | 17.19 | 16.98 | 16.67 | 16.53 | 16.33 | 16.14 | 16.00 | 15.86 | 15.72 |
| 5.72  | 17.84 | 17.55 | 17.25 | 16.99 | 16.81 | 16.58 | 16.36 | 16.24 | 16.12 | 15.98 | 15.88 |
| 5.92  | 18.23 | 17.91 | 17.63 | 17.38 | 17.08 | 16.84 | 16.76 | 16.54 | 16.34 | 16.19 | 16.08 |
| 6.12  | 17.77 | 17.48 | 17.25 | 16.92 | 16.69 | 16.43 | 16.31 | 16.12 | 15.95 | 15.84 | 15.67 |
| 6.32  | 17.75 | 17.49 | 17.08 | 16.91 | 16.71 | 16.44 | 16.21 | 16.10 | 15.99 | 15.81 | 15.64 |
| 6.52  | 18.01 | 17.73 | 17.41 | 17.14 | 16.90 | 16.70 | 16.47 | 16.29 | 16.07 | 15.98 | 15.79 |
| 6.72  | 18.17 | 17.73 | 17.53 | 17.29 | 16.99 | 16.75 | 16.55 | 16.35 | 16.22 | 16.09 | 15.92 |
| 6.92  | 17.95 | 17.64 | 17.36 | 17.10 | 16.80 | 16.60 | 16.40 | 16.18 | 16.04 | 15.87 | 15.73 |
| 7.12  | 17.85 | 17.57 | 17.19 | 16.92 | 16.69 | 16.40 | 16.18 | 15.94 | 15.80 | 15.61 | 15.43 |
| 7.32  | 18.37 | 18.05 | 17.72 | 17.52 | 17.19 | 16.99 | 16.78 | 16.54 | 16.45 | 16.27 | 16.13 |
| 7.52  | 17.89 | 17.55 | 17.25 | 16.99 | 16.74 | 16.48 | 16.28 | 16.08 | 15.93 | 15.76 | 15.68 |
| 7.72  | 17.72 | 17.43 | 17.07 | 16.84 | 16.60 | 16.36 | 16.14 | 15.92 | 15.81 | 15.67 | 15.53 |
| 7.92  | 18.22 | 17.93 | 17.61 | 17.32 | 17.03 | 16.80 | 16.56 | 16.42 | 16.19 | 16.09 | 15.91 |
| 8.12  | 18.19 | 17.81 | 17.53 | 17.27 | 16.98 | 16.72 | 16.50 | 16.31 | 16.19 | 16.00 | 15.93 |
| 8.32  | 18.07 | 17.78 | 17.42 | 17.16 | 16.98 | 16.68 | 16.48 | 16.28 | 16.09 | 15.93 | 15.75 |
| 8.52  | 18.06 | 17.68 | 17.37 | 17.12 | 16.84 | 16.52 | 16.32 | 16.16 | 16.01 | 15.82 | 15.72 |
| 8.72  | 18.10 | 17.73 | 17.38 | 17.15 | 16.79 | 16.57 | 16.28 | 16.15 | 15.95 | 15.79 | 15.69 |
| 8.92  | 18.13 | 17.83 | 17.46 | 17.20 | 16.95 | 16.70 | 16.50 | 16.28 | 16.13 | 15.98 | 15.77 |
| 9.12  | 18.38 | 18.06 | 17.70 | 17.40 | 17.14 | 16.96 | 16.68 | 16.49 | 16.39 | 16.19 | 16.02 |
| 9.32  | 18.37 | 18.01 | 17.69 | 17.50 | 17.15 | 16.89 | 16.67 | 16.52 | 16.33 | 16.16 | 16.09 |
| 9.52  | 18.77 | 18.37 | 18.05 | 17.74 | 17.46 | 17.16 | 16.92 | 16.76 | 16.57 | 16.39 | 16.27 |
| 9.72  | 18.36 | 18.00 | 17.61 | 17.40 | 17.17 | 16.83 | 16.59 | 16.37 | 16.27 | 16.07 | 15.94 |
| 9.92  | 18.37 | 18.08 | 17.73 | 17.43 | 17.13 | 16.85 | 16.61 | 16.41 | 16.28 | 16.15 | 15.99 |
| 10.12 | 18.26 | 17.88 | 17.53 | 17.25 | 16.93 | 16.72 | 16.44 | 16.24 | 16.04 | 15.90 | 15.78 |
| 10.32 | 18.43 | 18.11 | 17.75 | 17.53 | 17.21 | 16.93 | 16.77 | 16.60 | 16.37 | 16.23 | 16.06 |
| 10.52 | 18.10 | 17.70 | 17.36 | 17.07 | 16.82 | 16.54 | 16.36 | 16.12 | 15.95 | 15.82 | 15.65 |
| 10.72 | 17.86 | 17.53 | 17.22 | 16.96 | 16.64 | 16.37 | 16.15 | 15.96 | 15.81 | 15.63 | 15.45 |
| 10.92 | 18.43 | 18.07 | 17.73 | 17.46 | 17.15 | 16.92 | 16.65 | 16.42 | 16.27 | 16.20 | 15.97 |
| 11.12 | 18.15 | 17.77 | 17.50 | 17.21 | 16.94 | 16.69 | 16.43 | 16.21 | 16.06 | 15.90 | 15.70 |
| 11.32 | 18.24 | 17.86 | 17.51 | 17.15 | 16.93 | 16.66 | 16.37 | 16.22 | 16.04 | 15.88 | 15.73 |
| 11.52 | 18.33 | 17.96 | 17.51 | 17.23 | 16.99 | 16.75 | 16.46 | 16.20 | 16.09 | 15.88 | 15.70 |
| 11.72 | 17.85 | 17.51 | 17.13 | 16.88 | 16.64 | 16.35 | 16.11 | 15.90 | 15.69 | 15.53 | 15.39 |

|       |       |       |       |       |       |       |       |       |       |       |       |
|-------|-------|-------|-------|-------|-------|-------|-------|-------|-------|-------|-------|
| 11.92 | 17.45 | 17.10 | 16.74 | 16.43 | 16.17 | 15.92 | 15.64 | 15.45 | 15.28 | 15.12 | 14.97 |
| 12.12 | 17.70 | 17.33 | 17.00 | 16.67 | 16.34 | 16.07 | 15.86 | 15.63 | 15.47 | 15.26 | 15.10 |
| 12.32 | 18.22 | 17.80 | 17.45 | 17.18 | 16.86 | 16.59 | 16.34 | 16.14 | 15.89 | 15.77 | 15.62 |
| 12.52 | 18.78 | 18.40 | 18.01 | 17.83 | 17.45 | 17.19 | 16.88 | 16.63 | 16.49 | 16.28 | 16.12 |
| 12.72 | 18.36 | 17.94 | 17.64 | 17.34 | 16.98 | 16.77 | 16.51 | 16.38 | 16.16 | 15.90 | 15.74 |
| 12.92 | 18.28 | 17.93 | 17.54 | 17.25 | 16.95 | 16.65 | 16.46 | 16.23 | 16.10 | 15.96 | 15.76 |
| 13.12 | 18.12 | 17.84 | 17.42 | 17.13 | 16.82 | 16.57 | 16.31 | 16.12 | 15.94 | 15.76 | 15.65 |
| 13.32 | 18.27 | 17.98 | 17.59 | 17.31 | 17.00 | 16.78 | 16.56 | 16.35 | 16.17 | 16.01 | 15.85 |
| 13.52 | 18.47 | 18.18 | 17.84 | 17.53 | 17.23 | 16.94 | 16.69 | 16.43 | 16.27 | 16.11 | 15.89 |
| 13.72 | 18.86 | 18.51 | 18.08 | 17.81 | 17.52 | 17.18 | 16.97 | 16.77 | 16.56 | 16.43 | 16.18 |
| 13.92 | 18.62 | 18.24 | 17.86 | 17.54 | 17.26 | 16.94 | 16.74 | 16.47 | 16.35 | 16.11 | 16.02 |
| 14    | 17.90 | 17.57 | 17.20 | 16.89 | 16.59 | 16.36 | 16.14 | 15.85 | 15.69 | 15.58 | 15.39 |
| 14.08 | 18.01 | 17.72 | 17.36 | 17.05 | 16.77 | 16.50 | 16.26 | 16.04 | 15.81 | 15.76 | 15.56 |
| 14.17 | 18.04 | 17.69 | 17.35 | 17.04 | 16.72 | 16.38 | 16.25 | 15.99 | 15.81 | 15.61 | 15.38 |
| 14.27 | 18.37 | 18.08 | 17.67 | 17.37 | 17.09 | 16.81 | 16.61 | 16.48 | 16.24 | 16.07 | 15.88 |
| 14.38 | 18.31 | 17.96 | 17.61 | 17.30 | 16.95 | 16.75 | 16.46 | 16.23 | 16.07 | 15.86 | 15.74 |
| 14.49 | 17.99 | 17.65 | 17.22 | 17.00 | 16.66 | 16.46 | 16.25 | 16.02 | 15.84 | 15.66 | 15.56 |
| 14.61 | 18.17 | 17.82 | 17.45 | 17.20 | 16.87 | 16.63 | 16.40 | 16.17 | 16.05 | 15.83 | 15.65 |
| 14.75 | 18.27 | 17.99 | 17.58 | 17.29 | 16.94 | 16.70 | 16.46 | 16.19 | 16.00 | 15.85 | 15.66 |
| 14.89 | 18.38 | 18.01 | 17.70 | 17.36 | 17.08 | 16.80 | 16.52 | 16.39 | 16.21 | 16.08 | 15.90 |
| 15.05 | 18.89 | 18.54 | 18.14 | 17.86 | 17.55 | 17.24 | 17.06 | 16.75 | 16.66 | 16.41 | 16.25 |
| 15.21 | 18.20 | 17.81 | 17.42 | 17.07 | 16.76 | 16.56 | 16.23 | 16.07 | 15.91 | 15.69 | 15.54 |
| 15.39 | 18.13 | 17.74 | 17.43 | 17.14 | 16.78 | 16.54 | 16.29 | 16.06 | 15.96 | 15.73 | 15.60 |
| 15.59 | 18.19 | 17.80 | 17.51 | 17.20 | 16.81 | 16.61 | 16.30 | 16.10 | 15.97 | 15.78 | 15.65 |
| 15.8  | 17.91 | 17.52 | 17.22 | 16.87 | 16.55 | 16.32 | 16.07 | 15.87 | 15.70 | 15.51 | 15.36 |
| 16.02 | 18.25 | 17.88 | 17.54 | 17.23 | 16.91 | 16.64 | 16.38 | 16.17 | 16.02 | 15.86 | 15.65 |
| 16.27 | 18.74 | 18.40 | 18.03 | 17.68 | 17.40 | 17.06 | 16.84 | 16.52 | 16.38 | 16.22 | 16.04 |
| 16.53 | 18.44 | 18.08 | 17.64 | 17.37 | 17.06 | 16.80 | 16.56 | 16.34 | 16.15 | 15.91 | 15.75 |
| 16.81 | 18.39 | 18.04 | 17.62 | 17.32 | 17.00 | 16.73 | 16.53 | 16.25 | 16.10 | 15.88 | 15.77 |
| 17.12 | 18.13 | 17.76 | 17.33 | 17.07 | 16.76 | 16.43 | 16.19 | 16.07 | 15.86 | 15.67 | 15.44 |
| 17.45 | 18.45 | 18.06 | 17.71 | 17.39 | 17.02 | 16.82 | 16.57 | 16.35 | 16.15 | 15.97 | 15.80 |
| 17.81 | 18.80 | 18.45 | 18.03 | 17.76 | 17.41 | 17.14 | 16.92 | 16.66 | 16.44 | 16.21 | 16.09 |
| 18.19 | 18.67 | 18.38 | 17.99 | 17.59 | 17.30 | 17.02 | 16.75 | 16.49 | 16.30 | 16.09 | 15.92 |
| 18.6  | 18.15 | 17.76 | 17.41 | 17.10 | 16.87 | 16.48 | 16.30 | 16.04 | 15.89 | 15.63 | 15.54 |
| 19.05 | 18.26 | 17.91 | 17.53 | 17.17 | 16.93 | 16.62 | 16.41 | 16.17 | 16.01 | 15.85 | 15.67 |
| 19.53 | 18.72 | 18.37 | 17.98 | 17.62 | 17.28 | 17.02 | 16.78 | 16.52 | 16.34 | 16.12 | 15.93 |
| 20.05 | 18.29 | 17.86 | 17.52 | 17.18 | 16.87 | 16.63 | 16.39 | 16.13 | 15.98 | 15.81 | 15.60 |
| 20.61 | 18.60 | 18.21 | 17.81 | 17.54 | 17.18 | 16.96 | 16.67 | 16.38 | 16.24 | 16.04 | 15.88 |
| 21.22 | 18.29 | 17.95 | 17.53 | 17.21 | 16.98 | 16.64 | 16.43 | 16.14 | 15.99 | 15.81 | 15.62 |
| 21.87 | 18.18 | 17.80 | 17.47 | 17.11 | 16.82 | 16.52 | 16.24 | 16.05 | 15.84 | 15.67 | 15.54 |
| 22.57 | 18.63 | 18.26 | 17.94 | 17.57 | 17.28 | 16.95 | 16.68 | 16.45 | 16.29 | 16.14 | 15.98 |
| 23.33 | 18.46 | 18.17 | 17.75 | 17.44 | 17.12 | 16.79 | 16.54 | 16.29 | 16.14 | 15.93 | 15.75 |
| 24.15 | 18.94 | 18.60 | 18.23 | 17.89 | 17.61 | 17.26 | 16.99 | 16.79 | 16.56 | 16.36 | 16.19 |
| 25.03 | 18.86 | 18.47 | 18.13 | 17.77 | 17.44 | 17.09 | 16.85 | 16.60 | 16.40 | 16.17 | 15.97 |
| 25.98 | 18.40 | 17.96 | 17.64 | 17.34 | 17.02 | 16.69 | 16.50 | 16.23 | 16.04 | 15.86 | 15.72 |
| 27.01 | 18.37 | 18.07 | 17.66 | 17.39 | 17.04 | 16.80 | 16.56 | 16.33 | 16.16 | 15.94 | 15.82 |
| 28.11 | 18.46 | 18.08 | 17.67 | 17.38 | 17.11 | 16.75 | 16.48 | 16.19 | 16.06 | 15.86 | 15.73 |
| 29.3  | 18.89 | 18.51 | 18.18 | 17.82 | 17.47 | 17.20 | 16.89 | 16.60 | 16.42 | 16.22 | 16.13 |
| 30.59 | 18.54 | 18.15 | 17.80 | 17.44 | 17.15 | 16.90 | 16.58 | 16.34 | 16.16 | 15.95 | 15.78 |
| 31.98 | 18.87 | 18.38 | 18.06 | 17.75 | 17.40 | 17.10 | 16.83 | 16.56 | 16.38 | 16.15 | 15.99 |

|        |       |       |       |       |       |       |       |       |       |       |       |
|--------|-------|-------|-------|-------|-------|-------|-------|-------|-------|-------|-------|
| 33.47  | 19.11 | 18.70 | 18.30 | 17.99 | 17.62 | 17.35 | 17.04 | 16.84 | 16.60 | 16.37 | 16.16 |
| 35.09  | 19.16 | 18.72 | 18.34 | 18.03 | 17.64 | 17.39 | 17.10 | 16.88 | 16.65 | 16.39 | 16.26 |
| 36.83  | 19.40 | 18.98 | 18.58 | 18.22 | 17.90 | 17.59 | 17.27 | 17.02 | 16.79 | 16.54 | 16.32 |
| 38.71  | 19.64 | 19.29 | 18.81 | 18.47 | 18.14 | 17.81 | 17.55 | 17.29 | 17.08 | 16.88 | 16.66 |
| 40.73  | 19.60 | 19.24 | 18.83 | 18.39 | 18.07 | 17.79 | 17.44 | 17.20 | 17.05 | 16.78 | 16.58 |
| 42.92  | 20.44 | 20.03 | 19.61 | 19.26 | 18.88 | 18.56 | 18.24 | 17.92 | 17.72 | 17.44 | 17.29 |
| 45.27  | 19.54 | 19.15 | 18.71 | 18.35 | 18.04 | 17.66 | 17.41 | 17.18 | 16.83 | 16.68 | 16.54 |
| 47.81  | 19.91 | 19.51 | 19.05 | 18.66 | 18.36 | 18.00 | 17.77 | 17.49 | 17.31 | 17.09 | 16.91 |
| 50.55  | 20.01 | 19.59 | 19.17 | 18.80 | 18.52 | 18.16 | 17.86 | 17.54 | 17.30 | 17.10 | 16.87 |
| 53.51  | 20.13 | 19.72 | 19.33 | 19.00 | 18.67 | 18.35 | 18.02 | 17.77 | 17.57 | 17.33 | 17.17 |
| 56.69  | 20.63 | 20.22 | 19.78 | 19.44 | 19.09 | 18.71 | 18.40 | 18.09 | 17.82 | 17.57 | 17.38 |
| 60.13  | 20.43 | 19.98 | 19.66 | 19.26 | 18.93 | 18.56 | 18.27 | 17.99 | 17.76 | 17.51 | 17.29 |
| 63.84  | 20.78 | 20.34 | 19.96 | 19.53 | 19.17 | 18.83 | 18.56 | 18.24 | 18.00 | 17.77 | 17.57 |
| 67.83  | 21.07 | 20.69 | 20.26 | 19.87 | 19.55 | 19.16 | 18.84 | 18.58 | 18.35 | 18.06 | 17.84 |
| 72.15  | 21.21 | 20.79 | 20.37 | 19.98 | 19.63 | 19.27 | 18.98 | 18.72 | 18.49 | 18.22 | 17.95 |
| 76.8   | 21.11 | 20.69 | 20.26 | 19.87 | 19.55 | 19.21 | 18.83 | 18.55 | 18.28 | 18.00 | 17.74 |
| 81.81  | 21.43 | 21.00 | 20.59 | 20.23 | 19.78 | 19.44 | 19.13 | 18.80 | 18.53 | 18.28 | 18.04 |
| 87.22  | 21.51 | 21.14 | 20.67 | 20.31 | 19.95 | 19.51 | 19.22 | 18.87 | 18.62 | 18.36 | 18.15 |
| 93.06  | 22.44 | 22.01 | 21.57 | 21.18 | 20.74 | 20.42 | 20.01 | 19.72 | 19.42 | 19.14 | 18.92 |
| 99.35  | 23.18 | 22.75 | 22.28 | 21.90 | 21.47 | 21.09 | 20.71 | 20.40 | 20.13 | 19.83 | 19.59 |
| 106.13 | 22.83 | 22.32 | 21.96 | 21.58 | 21.18 | 20.78 | 20.49 | 20.18 | 19.82 | 19.53 | 19.27 |
| 113.45 | 23.19 | 22.72 | 22.38 | 21.88 | 21.47 | 21.09 | 20.69 | 20.34 | 20.09 | 19.74 | 19.45 |
| 121.34 | 22.88 | 22.43 | 21.99 | 21.59 | 21.19 | 20.82 | 20.49 | 20.15 | 19.92 | 19.61 | 19.33 |
| 129.86 | 23.64 | 23.19 | 22.74 | 22.34 | 21.96 | 21.55 | 21.21 | 20.89 | 20.54 | 20.22 | 19.97 |
| 139.04 | 24.66 | 24.20 | 23.71 | 23.28 | 22.86 | 22.43 | 22.05 | 21.64 | 21.33 | 21.01 | 20.72 |
| 148.94 | 25.08 | 24.59 | 24.15 | 23.75 | 23.27 | 22.87 | 22.52 | 22.09 | 21.78 | 21.49 | 21.15 |
| 159.62 | 24.83 | 24.43 | 23.92 | 23.44 | 23.04 | 22.61 | 22.22 | 21.87 | 21.50 | 21.17 | 20.88 |
| 171.14 | 25.15 | 24.77 | 24.23 | 23.83 | 23.36 | 22.91 | 22.62 | 22.21 | 21.85 | 21.54 | 21.19 |
| 183.56 | 25.27 | 24.81 | 24.35 | 23.97 | 23.49 | 23.09 | 22.71 | 22.28 | 21.99 | 21.69 | 21.32 |
| 196.96 | 26.37 | 25.87 | 25.40 | 24.96 | 24.51 | 24.11 | 23.67 | 23.28 | 22.90 | 22.46 | 22.13 |
| 211.41 | 26.91 | 26.39 | 25.93 | 25.50 | 25.02 | 24.48 | 24.13 | 23.72 | 23.37 | 22.93 | 22.62 |
| 226.99 | 28.10 | 27.59 | 27.11 | 26.63 | 26.14 | 25.70 | 25.25 | 24.82 | 24.42 | 24.02 | 23.66 |
| 243.8  | 27.67 | 27.17 | 26.62 | 26.14 | 25.66 | 25.28 | 24.82 | 24.32 | 24.02 | 23.57 | 23.25 |
| 261.93 | 28.65 | 28.16 | 27.63 | 27.15 | 26.67 | 26.21 | 25.73 | 25.29 | 24.89 | 24.44 | 24.12 |
| 281.48 | 28.93 | 28.47 | 27.91 | 27.43 | 26.91 | 26.45 | 26.01 | 25.54 | 25.06 | 24.71 | 24.28 |
| 302.56 | 29.73 | 29.23 | 28.66 | 28.16 | 27.64 | 27.21 | 26.75 | 26.29 | 25.83 | 25.39 | 24.95 |
| 325.3  | 30.11 | 29.56 | 29.05 | 28.52 | 28.06 | 27.58 | 27.09 | 26.60 | 26.17 | 25.73 | 25.31 |
| 349.83 | 29.76 | 29.24 | 28.70 | 28.23 | 27.74 | 27.21 | 26.74 | 26.27 | 25.87 | 25.41 | 25.00 |
| 376.28 | 31.13 | 30.61 | 29.97 | 29.59 | 29.01 | 28.52 | 28.02 | 27.50 | 27.01 | 26.58 | 26.09 |
| 404.81 | 31.35 | 30.75 | 30.22 | 29.74 | 29.18 | 28.64 | 28.14 | 27.66 | 27.17 | 26.71 | 26.26 |
| 435.58 | 31.88 | 31.38 | 30.80 | 30.32 | 29.80 | 29.25 | 28.70 | 28.18 | 27.71 | 27.26 | 26.81 |
| 468.76 | 32.89 | 32.32 | 31.77 | 31.18 | 30.70 | 30.07 | 29.54 | 29.03 | 28.54 | 28.05 | 27.52 |
| 504.55 | 33.32 | 32.78 | 32.21 | 31.67 | 31.13 | 30.55 | 30.00 | 29.51 | 28.97 | 28.41 | 27.96 |
| 543.15 | 33.51 | 32.94 | 32.29 | 31.81 | 31.21 | 30.70 | 30.17 | 29.62 | 29.13 | 28.55 | 28.02 |
| 584.78 | 33.99 | 33.48 | 32.90 | 32.33 | 31.74 | 31.18 | 30.68 | 30.10 | 29.55 | 29.05 | 28.54 |
| 629.68 | 34.77 | 34.20 | 33.54 | 32.99 | 32.38 | 31.81 | 31.26 | 30.71 | 30.18 | 29.60 | 29.08 |
| 678.1  | 34.74 | 34.12 | 33.58 | 32.95 | 32.32 | 31.76 | 31.21 | 30.65 | 30.07 | 29.49 | 28.95 |
| 730.33 | 35.43 | 34.83 | 34.21 | 33.68 | 33.10 | 32.46 | 31.89 | 31.32 | 30.80 | 30.20 | 29.62 |
| 786.65 | 35.45 | 34.87 | 34.34 | 33.74 | 33.13 | 32.54 | 32.00 | 31.43 | 30.91 | 30.31 | 29.75 |
| 847.4  | 36.16 | 35.49 | 34.91 | 34.37 | 33.71 | 33.11 | 32.47 | 31.87 | 31.30 | 30.75 | 30.13 |

|         |       |       |       |       |       |       |       |       |       |       |       |
|---------|-------|-------|-------|-------|-------|-------|-------|-------|-------|-------|-------|
| 912.92  | 35.84 | 35.25 | 34.61 | 34.04 | 33.42 | 32.82 | 32.22 | 31.66 | 31.05 | 30.48 | 29.90 |
| 983.58  | 35.68 | 35.14 | 34.50 | 33.94 | 33.32 | 32.72 | 32.13 | 31.54 | 30.97 | 30.39 | 29.78 |
| 1059.78 | 36.06 | 35.49 | 34.86 | 34.23 | 33.64 | 33.01 | 32.43 | 31.80 | 31.26 | 30.63 | 30.07 |
| 1141.98 | 35.82 | 35.30 | 34.70 | 34.10 | 33.52 | 32.91 | 32.32 | 31.65 | 31.12 | 30.52 | 29.92 |
| 1230.62 | 36.33 | 35.79 | 35.12 | 34.56 | 33.93 | 33.33 | 32.73 | 32.10 | 31.47 | 30.92 | 30.33 |
| 1326.23 | 37.05 | 36.43 | 35.80 | 35.20 | 34.52 | 33.95 | 33.30 | 32.73 | 32.10 | 31.49 | 30.92 |
| 1429.34 | 37.13 | 36.51 | 35.91 | 35.33 | 34.68 | 33.98 | 33.41 | 32.82 | 32.22 | 31.60 | 30.98 |
| 1540.54 | 36.87 | 36.39 | 35.66 | 35.13 | 34.43 | 33.82 | 33.22 | 32.60 | 32.02 | 31.43 | 30.76 |
| 1660.48 | 37.45 | 36.81 | 36.17 | 35.58 | 34.96 | 34.32 | 33.69 | 33.09 | 32.46 | 31.86 | 31.24 |
| 1789.83 | 37.45 | 36.89 | 36.22 | 35.61 | 35.00 | 34.37 | 33.71 | 33.12 | 32.56 | 31.96 | 31.37 |
| 1929.34 | 37.85 | 37.20 | 36.64 | 36.03 | 35.30 | 34.70 | 34.04 | 33.31 | 32.77 | 32.14 | 31.58 |
| 2079.8  | 36.92 | 36.25 | 35.65 | 35.04 | 34.39 | 33.79 | 33.21 | 32.59 | 31.97 | 31.37 | 30.75 |
| 2242.08 | 37.78 | 37.16 | 36.55 | 35.92 | 35.24 | 34.59 | 33.93 | 33.30 | 32.77 | 32.08 | 31.53 |
| 2417.1  | 37.16 | 36.62 | 35.92 | 35.34 | 34.69 | 34.05 | 33.40 | 32.75 | 32.17 | 31.60 | 30.98 |
| 2605.85 | 37.11 | 36.54 | 35.84 | 35.28 | 34.63 | 34.04 | 33.43 | 32.77 | 32.21 | 31.63 | 30.97 |
| 2809.43 | 36.97 | 36.40 | 35.73 | 35.04 | 34.45 | 33.89 | 33.18 | 32.63 | 31.96 | 31.39 | 30.74 |
| 3028.99 | 35.96 | 35.36 | 34.68 | 34.14 | 33.55 | 32.90 | 32.27 | 31.71 | 31.04 | 30.50 | 29.89 |
| 3265.79 | 36.30 | 35.63 | 35.13 | 34.51 | 33.86 | 33.24 | 32.60 | 31.98 | 31.40 | 30.83 | 30.19 |
| 3521.18 | 36.19 | 35.58 | 34.95 | 34.42 | 33.77 | 33.10 | 32.54 | 31.94 | 31.36 | 30.74 | 30.16 |
| 3796.62 | 36.72 | 36.17 | 35.48 | 34.87 | 34.21 | 33.62 | 33.00 | 32.39 | 31.84 | 31.20 | 30.58 |

| Wavelength (nm) \ Time (ps) | 615.09 | 616.50 | 617.91 | 619.32 | 620.72 | 622.13 | 623.54 | 624.95 | 626.36 | 627.77 | 629.18 |
|-----------------------------|--------|--------|--------|--------|--------|--------|--------|--------|--------|--------|--------|
| -3.28                       | 0.12   | 0.08   | 0.06   | 0.11   | 0.10   | 0.13   | 0.07   | 0.10   | 0.05   | 0.07   | 0.02   |
| -2.78                       | 0.00   | 0.02   | 0.04   | 0.00   | -0.02  | 0.00   | 0.04   | -0.02  | 0.00   | 0.04   | 0.02   |
| -2.28                       | 0.07   | 0.01   | -0.01  | -0.03  | 0.00   | -0.02  | -0.04  | -0.07  | -0.07  | -0.05  | -0.03  |
| -1.78                       | 0.12   | 0.10   | 0.13   | 0.16   | 0.10   | 0.14   | 0.12   | 0.11   | 0.10   | 0.06   | 0.10   |
| -1.28                       | 0.08   | 0.11   | 0.05   | 0.10   | 0.07   | 0.10   | 0.10   | 0.08   | 0.13   | 0.12   | 0.12   |
| -0.78                       | -0.12  | -0.09  | -0.12  | -0.10  | -0.10  | -0.09  | -0.09  | -0.10  | -0.09  | -0.15  | -0.11  |
| -0.28                       | -0.26  | -0.24  | -0.20  | -0.18  | -0.16  | -0.18  | -0.12  | -0.09  | -0.06  | -0.04  | -0.03  |
| 0.22                        | -0.02  | 0.01   | 0.05   | -0.05  | 0.01   | -0.07  | -0.07  | -0.02  | -0.06  | -0.06  | -0.09  |
| 0.32                        | 0.27   | 0.21   | 0.20   | 0.21   | 0.19   | 0.11   | 0.15   | 0.15   | 0.12   | 0.09   | 0.10   |
| 0.42                        | 0.25   | 0.18   | 0.20   | 0.19   | 0.21   | 0.17   | 0.17   | 0.20   | 0.21   | 0.15   | 0.12   |
| 0.52                        | -0.04  | -0.02  | -0.06  | -0.07  | 0.02   | 0.00   | -0.04  | 0.00   | -0.05  | 0.03   | 0.03   |
| 0.62                        | 0.01   | -0.05  | -0.02  | -0.05  | -0.05  | -0.07  | -0.04  | -0.04  | 0.00   | -0.11  | -0.03  |
| 0.72                        | 0.11   | 0.13   | 0.12   | 0.10   | 0.14   | 0.20   | 0.18   | 0.12   | 0.14   | 0.14   | 0.21   |
| 0.77                        | 0.22   | 0.26   | 0.23   | 0.19   | 0.17   | 0.15   | 0.17   | 0.20   | 0.16   | 0.18   | 0.09   |
| 0.82                        | -0.11  | -0.13  | -0.13  | -0.16  | -0.08  | -0.06  | -0.13  | -0.12  | -0.13  | -0.08  | -0.08  |
| 0.87                        | -0.21  | -0.20  | -0.20  | -0.21  | -0.16  | -0.17  | -0.14  | -0.15  | -0.11  | -0.17  | -0.08  |
| 0.92                        | 0.15   | 0.09   | 0.14   | 0.18   | 0.15   | 0.11   | 0.17   | 0.12   | 0.17   | 0.21   | 0.20   |
| 0.97                        | 0.24   | 0.22   | 0.24   | 0.24   | 0.27   | 0.22   | 0.26   | 0.22   | 0.20   | 0.20   | 0.18   |
| 1.02                        | 0.12   | 0.05   | 0.12   | 0.10   | 0.12   | 0.08   | -0.02  | -0.02  | 0.03   | 0.00   | 0.00   |
| 1.07                        | 0.07   | 0.02   | 0.05   | 0.10   | 0.09   | 0.06   | 0.05   | 0.04   | 0.00   | 0.06   | 0.06   |
| 1.12                        | -0.08  | -0.05  | -0.03  | -0.04  | 0.01   | -0.01  | 0.01   | -0.05  | -0.02  | -0.01  | 0.01   |
| 1.17                        | 0.15   | 0.17   | 0.18   | 0.19   | 0.19   | 0.20   | 0.15   | 0.19   | 0.17   | 0.20   | 0.21   |
| 1.22                        | 0.15   | 0.12   | 0.11   | 0.17   | 0.15   | 0.07   | 0.05   | 0.08   | 0.07   | 0.09   | 0.07   |
| 1.27                        | 0.16   | 0.09   | 0.15   | 0.12   | 0.13   | 0.13   | 0.09   | 0.13   | 0.10   | 0.10   | 0.14   |
| 1.32                        | 0.12   | 0.07   | 0.09   | 0.06   | 0.09   | 0.10   | 0.14   | 0.09   | 0.06   | 0.10   | 0.14   |

|      |       |       |       |       |       |       |       |       |       |       |       |
|------|-------|-------|-------|-------|-------|-------|-------|-------|-------|-------|-------|
| 1.37 | 0.11  | 0.05  | 0.09  | 0.09  | 0.10  | 0.07  | 0.01  | -0.02 | -0.01 | 0.03  | 0.10  |
| 1.42 | 0.20  | 0.23  | 0.13  | 0.17  | 0.19  | 0.15  | 0.11  | 0.09  | 0.14  | 0.15  | 0.12  |
| 1.47 | 0.14  | 0.11  | 0.08  | 0.05  | 0.05  | 0.01  | 0.05  | 0.02  | 0.07  | 0.02  | 0.03  |
| 1.52 | 0.13  | -0.03 | -0.03 | -0.04 | -0.15 | -0.17 | -0.22 | -0.18 | -0.23 | -0.19 | -0.19 |
| 1.57 | 2.26  | 2.09  | 1.85  | 1.80  | 1.60  | 1.52  | 1.28  | 1.16  | 1.08  | 1.06  | 0.94  |
| 1.62 | 9.06  | 8.86  | 8.59  | 8.34  | 8.12  | 7.83  | 7.55  | 7.21  | 6.94  | 6.66  | 6.43  |
| 1.67 | 19.04 | 19.05 | 19.03 | 19.06 | 19.03 | 18.96 | 18.87 | 18.71 | 18.58 | 18.49 | 18.36 |
| 1.72 | 20.24 | 20.50 | 20.68 | 20.94 | 21.15 | 21.36 | 21.57 | 21.71 | 21.90 | 22.17 | 22.36 |
| 1.77 | 17.94 | 18.16 | 18.40 | 18.67 | 18.99 | 19.24 | 19.50 | 19.81 | 20.08 | 20.38 | 20.68 |
| 1.82 | 15.92 | 16.22 | 16.49 | 16.82 | 17.04 | 17.41 | 17.69 | 18.01 | 18.27 | 18.65 | 19.02 |
| 1.87 | 14.37 | 14.53 | 14.79 | 15.06 | 15.27 | 15.54 | 15.81 | 16.16 | 16.48 | 16.82 | 17.14 |
| 1.92 | 13.69 | 13.82 | 14.04 | 14.28 | 14.55 | 14.77 | 15.06 | 15.24 | 15.55 | 15.93 | 16.28 |
| 1.97 | 13.22 | 13.40 | 13.56 | 13.70 | 13.95 | 14.13 | 14.39 | 14.67 | 14.88 | 15.17 | 15.54 |
| 2.02 | 13.14 | 13.22 | 13.36 | 13.54 | 13.79 | 13.92 | 14.05 | 14.33 | 14.62 | 14.88 | 15.16 |
| 2.07 | 13.43 | 13.49 | 13.59 | 13.79 | 13.93 | 14.15 | 14.27 | 14.49 | 14.75 | 15.02 | 15.30 |
| 2.12 | 12.78 | 12.89 | 13.03 | 13.21 | 13.42 | 13.57 | 13.76 | 13.90 | 14.08 | 14.40 | 14.76 |
| 2.17 | 12.95 | 12.98 | 13.08 | 13.21 | 13.33 | 13.47 | 13.64 | 13.83 | 14.09 | 14.25 | 14.54 |
| 2.22 | 13.01 | 13.06 | 13.14 | 13.24 | 13.40 | 13.52 | 13.69 | 13.83 | 14.06 | 14.29 | 14.49 |
| 2.27 | 13.29 | 13.34 | 13.42 | 13.49 | 13.61 | 13.78 | 13.90 | 14.07 | 14.25 | 14.47 | 14.64 |
| 2.32 | 13.80 | 13.78 | 13.90 | 13.99 | 14.06 | 14.19 | 14.30 | 14.48 | 14.60 | 14.89 | 15.14 |
| 2.37 | 13.59 | 13.61 | 13.68 | 13.79 | 13.90 | 14.03 | 14.14 | 14.22 | 14.41 | 14.62 | 14.86 |
| 2.42 | 13.49 | 13.56 | 13.55 | 13.67 | 13.78 | 13.90 | 13.98 | 14.11 | 14.27 | 14.51 | 14.74 |
| 2.47 | 13.66 | 13.66 | 13.73 | 13.84 | 13.90 | 14.01 | 14.13 | 14.23 | 14.39 | 14.55 | 14.75 |
| 2.52 | 13.42 | 13.42 | 13.54 | 13.55 | 13.64 | 13.76 | 13.78 | 13.96 | 14.11 | 14.25 | 14.51 |
| 2.57 | 13.87 | 13.85 | 13.83 | 13.94 | 14.00 | 14.11 | 14.18 | 14.25 | 14.41 | 14.58 | 14.80 |
| 2.62 | 14.00 | 13.92 | 13.97 | 14.02 | 14.07 | 14.19 | 14.30 | 14.38 | 14.52 | 14.69 | 14.81 |
| 2.67 | 13.71 | 13.71 | 13.76 | 13.87 | 13.93 | 13.95 | 14.10 | 14.21 | 14.43 | 14.54 | 14.70 |
| 2.72 | 13.56 | 13.58 | 13.63 | 13.67 | 13.70 | 13.75 | 13.89 | 14.04 | 14.20 | 14.39 | 14.49 |
| 2.77 | 13.89 | 13.87 | 13.94 | 14.07 | 14.11 | 14.22 | 14.30 | 14.36 | 14.55 | 14.68 | 14.88 |
| 2.82 | 14.09 | 14.05 | 14.05 | 14.07 | 14.21 | 14.25 | 14.29 | 14.39 | 14.49 | 14.63 | 14.81 |
| 2.87 | 14.18 | 14.17 | 14.21 | 14.22 | 14.28 | 14.30 | 14.45 | 14.48 | 14.68 | 14.76 | 14.92 |
| 2.92 | 14.34 | 14.30 | 14.33 | 14.40 | 14.40 | 14.47 | 14.52 | 14.57 | 14.72 | 14.87 | 15.04 |
| 2.97 | 14.52 | 14.52 | 14.55 | 14.57 | 14.63 | 14.65 | 14.80 | 14.77 | 14.91 | 15.10 | 15.28 |
| 3.02 | 14.09 | 14.14 | 14.12 | 14.19 | 14.26 | 14.31 | 14.44 | 14.49 | 14.57 | 14.73 | 14.98 |
| 3.07 | 14.12 | 14.08 | 14.10 | 14.15 | 14.19 | 14.28 | 14.34 | 14.40 | 14.47 | 14.64 | 14.79 |
| 3.12 | 15.00 | 14.99 | 14.95 | 14.98 | 14.98 | 15.07 | 15.04 | 15.14 | 15.27 | 15.41 | 15.52 |
| 3.17 | 14.49 | 14.39 | 14.40 | 14.42 | 14.39 | 14.53 | 14.59 | 14.61 | 14.70 | 14.85 | 15.01 |
| 3.22 | 14.35 | 14.34 | 14.39 | 14.41 | 14.40 | 14.49 | 14.57 | 14.64 | 14.71 | 14.89 | 15.07 |
| 3.27 | 14.15 | 14.12 | 14.12 | 14.20 | 14.22 | 14.29 | 14.35 | 14.39 | 14.48 | 14.63 | 14.80 |
| 3.32 | 14.75 | 14.64 | 14.68 | 14.68 | 14.71 | 14.67 | 14.73 | 14.80 | 14.91 | 15.01 | 15.12 |
| 3.37 | 14.60 | 14.54 | 14.59 | 14.56 | 14.58 | 14.59 | 14.69 | 14.76 | 14.87 | 14.99 | 15.10 |
| 3.42 | 14.53 | 14.50 | 14.49 | 14.46 | 14.53 | 14.51 | 14.62 | 14.67 | 14.71 | 14.87 | 15.00 |
| 3.47 | 14.52 | 14.46 | 14.43 | 14.45 | 14.47 | 14.50 | 14.57 | 14.67 | 14.70 | 14.80 | 14.96 |
| 3.52 | 14.84 | 14.79 | 14.78 | 14.76 | 14.83 | 14.87 | 14.90 | 15.02 | 15.07 | 15.20 | 15.35 |
| 3.57 | 14.41 | 14.41 | 14.39 | 14.42 | 14.42 | 14.53 | 14.46 | 14.59 | 14.71 | 14.76 | 14.89 |
| 3.62 | 14.85 | 14.74 | 14.79 | 14.77 | 14.82 | 14.83 | 14.82 | 14.89 | 14.90 | 15.05 | 15.22 |
| 3.67 | 15.01 | 14.96 | 14.94 | 14.99 | 15.05 | 15.04 | 15.06 | 15.12 | 15.16 | 15.31 | 15.44 |
| 3.72 | 15.27 | 15.17 | 15.15 | 15.08 | 15.10 | 15.05 | 15.07 | 15.13 | 15.18 | 15.27 | 15.41 |
| 3.92 | 14.62 | 14.53 | 14.53 | 14.54 | 14.55 | 14.59 | 14.65 | 14.72 | 14.73 | 14.89 | 14.95 |
| 4.12 | 15.12 | 15.03 | 14.96 | 14.91 | 14.91 | 15.01 | 14.97 | 15.06 | 15.09 | 15.18 | 15.26 |

|       |       |       |       |       |       |       |       |       |       |       |       |
|-------|-------|-------|-------|-------|-------|-------|-------|-------|-------|-------|-------|
| 4.32  | 15.23 | 15.13 | 15.08 | 15.11 | 15.05 | 15.10 | 15.13 | 15.18 | 15.32 | 15.41 | 15.48 |
| 4.52  | 15.72 | 15.64 | 15.59 | 15.57 | 15.52 | 15.44 | 15.47 | 15.53 | 15.63 | 15.67 | 15.72 |
| 4.72  | 15.73 | 15.64 | 15.58 | 15.55 | 15.52 | 15.48 | 15.44 | 15.50 | 15.50 | 15.63 | 15.71 |
| 4.92  | 15.48 | 15.36 | 15.35 | 15.29 | 15.35 | 15.32 | 15.34 | 15.36 | 15.41 | 15.53 | 15.73 |
| 5.12  | 15.79 | 15.59 | 15.58 | 15.58 | 15.54 | 15.49 | 15.51 | 15.58 | 15.65 | 15.78 | 15.88 |
| 5.32  | 15.87 | 15.77 | 15.73 | 15.69 | 15.66 | 15.67 | 15.63 | 15.69 | 15.71 | 15.86 | 15.98 |
| 5.52  | 15.64 | 15.58 | 15.52 | 15.44 | 15.46 | 15.43 | 15.47 | 15.48 | 15.57 | 15.65 | 15.72 |
| 5.72  | 15.75 | 15.70 | 15.66 | 15.58 | 15.59 | 15.54 | 15.67 | 15.72 | 15.70 | 15.85 | 15.94 |
| 5.92  | 15.98 | 15.89 | 15.84 | 15.85 | 15.74 | 15.76 | 15.76 | 15.75 | 15.82 | 15.93 | 16.03 |
| 6.12  | 15.60 | 15.48 | 15.43 | 15.44 | 15.39 | 15.43 | 15.38 | 15.36 | 15.47 | 15.57 | 15.65 |
| 6.32  | 15.58 | 15.50 | 15.45 | 15.40 | 15.43 | 15.43 | 15.38 | 15.41 | 15.53 | 15.54 | 15.66 |
| 6.52  | 15.75 | 15.62 | 15.56 | 15.54 | 15.52 | 15.52 | 15.54 | 15.59 | 15.63 | 15.64 | 15.78 |
| 6.72  | 15.85 | 15.73 | 15.75 | 15.71 | 15.68 | 15.64 | 15.63 | 15.72 | 15.74 | 15.83 | 15.86 |
| 6.92  | 15.68 | 15.57 | 15.51 | 15.44 | 15.47 | 15.43 | 15.44 | 15.45 | 15.50 | 15.62 | 15.71 |
| 7.12  | 15.31 | 15.17 | 15.08 | 15.05 | 15.00 | 15.00 | 14.98 | 14.96 | 15.03 | 15.10 | 15.22 |
| 7.32  | 16.09 | 15.93 | 15.85 | 15.75 | 15.77 | 15.73 | 15.77 | 15.79 | 15.84 | 15.87 | 16.01 |
| 7.52  | 15.53 | 15.42 | 15.36 | 15.34 | 15.29 | 15.30 | 15.31 | 15.34 | 15.34 | 15.46 | 15.52 |
| 7.72  | 15.45 | 15.37 | 15.28 | 15.32 | 15.25 | 15.28 | 15.28 | 15.29 | 15.36 | 15.46 | 15.65 |
| 7.92  | 15.84 | 15.71 | 15.63 | 15.60 | 15.62 | 15.60 | 15.63 | 15.63 | 15.67 | 15.70 | 15.85 |
| 8.12  | 15.80 | 15.61 | 15.50 | 15.55 | 15.49 | 15.48 | 15.48 | 15.49 | 15.50 | 15.58 | 15.69 |
| 8.32  | 15.67 | 15.53 | 15.47 | 15.42 | 15.40 | 15.40 | 15.40 | 15.41 | 15.52 | 15.64 | 15.69 |
| 8.52  | 15.58 | 15.50 | 15.41 | 15.43 | 15.44 | 15.37 | 15.41 | 15.54 | 15.50 | 15.56 | 15.68 |
| 8.72  | 15.56 | 15.45 | 15.35 | 15.34 | 15.34 | 15.27 | 15.30 | 15.33 | 15.32 | 15.37 | 15.54 |
| 8.92  | 15.78 | 15.62 | 15.56 | 15.53 | 15.57 | 15.51 | 15.51 | 15.54 | 15.66 | 15.75 | 15.82 |
| 9.12  | 15.97 | 15.91 | 15.81 | 15.74 | 15.78 | 15.76 | 15.78 | 15.78 | 15.86 | 15.92 | 16.09 |
| 9.32  | 15.94 | 15.85 | 15.76 | 15.71 | 15.73 | 15.73 | 15.81 | 15.76 | 15.79 | 15.92 | 16.05 |
| 9.52  | 16.16 | 16.02 | 15.92 | 15.91 | 15.86 | 15.84 | 15.84 | 15.87 | 15.93 | 16.03 | 16.17 |
| 9.72  | 15.78 | 15.71 | 15.69 | 15.64 | 15.62 | 15.58 | 15.60 | 15.64 | 15.66 | 15.76 | 15.94 |
| 9.92  | 15.90 | 15.75 | 15.68 | 15.69 | 15.67 | 15.67 | 15.67 | 15.71 | 15.74 | 15.85 | 16.01 |
| 10.12 | 15.70 | 15.57 | 15.46 | 15.38 | 15.41 | 15.39 | 15.42 | 15.48 | 15.49 | 15.56 | 15.65 |
| 10.32 | 15.96 | 15.86 | 15.77 | 15.71 | 15.69 | 15.65 | 15.67 | 15.63 | 15.69 | 15.77 | 15.92 |
| 10.52 | 15.61 | 15.45 | 15.36 | 15.34 | 15.37 | 15.32 | 15.38 | 15.36 | 15.45 | 15.55 | 15.65 |
| 10.72 | 15.32 | 15.22 | 15.22 | 15.14 | 15.13 | 15.08 | 15.05 | 15.16 | 15.19 | 15.29 | 15.35 |
| 10.92 | 15.89 | 15.74 | 15.71 | 15.64 | 15.64 | 15.61 | 15.63 | 15.65 | 15.71 | 15.82 | 15.91 |
| 11.12 | 15.63 | 15.58 | 15.48 | 15.48 | 15.47 | 15.45 | 15.48 | 15.49 | 15.57 | 15.64 | 15.80 |
| 11.32 | 15.62 | 15.48 | 15.41 | 15.39 | 15.37 | 15.36 | 15.36 | 15.40 | 15.52 | 15.62 | 15.63 |
| 11.52 | 15.60 | 15.48 | 15.37 | 15.35 | 15.30 | 15.26 | 15.26 | 15.34 | 15.36 | 15.41 | 15.59 |
| 11.72 | 15.30 | 15.18 | 15.09 | 15.07 | 15.08 | 15.09 | 15.10 | 15.14 | 15.16 | 15.25 | 15.40 |
| 11.92 | 14.87 | 14.74 | 14.65 | 14.64 | 14.58 | 14.60 | 14.54 | 14.61 | 14.69 | 14.68 | 14.84 |
| 12.12 | 15.02 | 14.89 | 14.81 | 14.80 | 14.70 | 14.74 | 14.69 | 14.73 | 14.80 | 14.81 | 14.95 |
| 12.32 | 15.50 | 15.41 | 15.31 | 15.24 | 15.18 | 15.19 | 15.23 | 15.28 | 15.27 | 15.41 | 15.51 |
| 12.52 | 16.07 | 15.89 | 15.77 | 15.71 | 15.71 | 15.66 | 15.67 | 15.65 | 15.70 | 15.73 | 15.91 |
| 12.72 | 15.72 | 15.53 | 15.54 | 15.48 | 15.49 | 15.47 | 15.48 | 15.56 | 15.58 | 15.66 | 15.80 |
| 12.92 | 15.59 | 15.54 | 15.50 | 15.43 | 15.44 | 15.38 | 15.39 | 15.44 | 15.55 | 15.61 | 15.73 |
| 13.12 | 15.51 | 15.35 | 15.28 | 15.27 | 15.28 | 15.24 | 15.16 | 15.28 | 15.36 | 15.40 | 15.53 |
| 13.32 | 15.77 | 15.75 | 15.68 | 15.60 | 15.63 | 15.64 | 15.63 | 15.76 | 15.76 | 15.82 | 16.00 |
| 13.52 | 15.82 | 15.69 | 15.57 | 15.55 | 15.55 | 15.53 | 15.56 | 15.55 | 15.63 | 15.64 | 15.80 |
| 13.72 | 16.06 | 15.95 | 15.90 | 15.80 | 15.76 | 15.73 | 15.76 | 15.77 | 15.81 | 15.90 | 16.01 |
| 13.92 | 15.90 | 15.76 | 15.70 | 15.71 | 15.67 | 15.60 | 15.67 | 15.64 | 15.70 | 15.79 | 15.93 |
| 14    | 15.30 | 15.25 | 15.21 | 15.12 | 15.11 | 15.13 | 15.10 | 15.21 | 15.22 | 15.31 | 15.49 |

|       |       |       |       |       |       |       |       |       |       |       |       |
|-------|-------|-------|-------|-------|-------|-------|-------|-------|-------|-------|-------|
| 14.08 | 15.45 | 15.36 | 15.30 | 15.29 | 15.32 | 15.27 | 15.27 | 15.29 | 15.35 | 15.45 | 15.60 |
| 14.17 | 15.33 | 15.21 | 15.17 | 15.05 | 15.04 | 14.97 | 14.99 | 14.99 | 15.03 | 15.14 | 15.23 |
| 14.27 | 15.82 | 15.69 | 15.61 | 15.54 | 15.48 | 15.55 | 15.59 | 15.54 | 15.67 | 15.72 | 15.81 |
| 14.38 | 15.57 | 15.47 | 15.42 | 15.41 | 15.34 | 15.34 | 15.35 | 15.40 | 15.44 | 15.52 | 15.63 |
| 14.49 | 15.40 | 15.34 | 15.29 | 15.28 | 15.21 | 15.22 | 15.23 | 15.26 | 15.36 | 15.44 | 15.50 |
| 14.61 | 15.63 | 15.43 | 15.43 | 15.36 | 15.38 | 15.38 | 15.40 | 15.45 | 15.54 | 15.66 | 15.75 |
| 14.75 | 15.56 | 15.46 | 15.39 | 15.36 | 15.33 | 15.35 | 15.41 | 15.40 | 15.44 | 15.52 | 15.62 |
| 14.89 | 15.78 | 15.66 | 15.61 | 15.60 | 15.59 | 15.54 | 15.54 | 15.56 | 15.61 | 15.70 | 15.80 |
| 15.05 | 16.12 | 16.04 | 15.96 | 15.91 | 15.87 | 15.81 | 15.84 | 15.85 | 15.92 | 16.06 | 16.14 |
| 15.21 | 15.47 | 15.34 | 15.22 | 15.24 | 15.20 | 15.15 | 15.18 | 15.17 | 15.24 | 15.34 | 15.48 |
| 15.39 | 15.53 | 15.39 | 15.30 | 15.30 | 15.27 | 15.27 | 15.30 | 15.33 | 15.37 | 15.48 | 15.59 |
| 15.59 | 15.58 | 15.39 | 15.34 | 15.31 | 15.32 | 15.31 | 15.29 | 15.34 | 15.42 | 15.53 | 15.66 |
| 15.8  | 15.25 | 15.08 | 15.10 | 15.06 | 15.04 | 15.00 | 15.04 | 15.08 | 15.17 | 15.30 | 15.37 |
| 16.02 | 15.56 | 15.41 | 15.36 | 15.31 | 15.27 | 15.26 | 15.26 | 15.29 | 15.32 | 15.43 | 15.57 |
| 16.27 | 15.88 | 15.81 | 15.62 | 15.56 | 15.53 | 15.60 | 15.59 | 15.56 | 15.57 | 15.70 | 15.81 |
| 16.53 | 15.64 | 15.51 | 15.42 | 15.41 | 15.36 | 15.35 | 15.35 | 15.38 | 15.45 | 15.47 | 15.60 |
| 16.81 | 15.65 | 15.54 | 15.47 | 15.44 | 15.39 | 15.34 | 15.38 | 15.43 | 15.47 | 15.59 | 15.65 |
| 17.12 | 15.40 | 15.28 | 15.17 | 15.13 | 15.13 | 15.16 | 15.10 | 15.16 | 15.25 | 15.33 | 15.48 |
| 17.45 | 15.72 | 15.57 | 15.47 | 15.42 | 15.44 | 15.40 | 15.46 | 15.47 | 15.51 | 15.61 | 15.76 |
| 17.81 | 15.99 | 15.82 | 15.72 | 15.61 | 15.66 | 15.60 | 15.59 | 15.62 | 15.67 | 15.76 | 15.80 |
| 18.19 | 15.83 | 15.63 | 15.58 | 15.51 | 15.48 | 15.49 | 15.46 | 15.45 | 15.55 | 15.62 | 15.64 |
| 18.6  | 15.33 | 15.25 | 15.19 | 15.12 | 15.13 | 15.15 | 15.15 | 15.14 | 15.18 | 15.33 | 15.42 |
| 19.05 | 15.66 | 15.55 | 15.45 | 15.43 | 15.36 | 15.39 | 15.45 | 15.50 | 15.52 | 15.62 | 15.83 |
| 19.53 | 15.80 | 15.67 | 15.60 | 15.60 | 15.55 | 15.47 | 15.51 | 15.55 | 15.60 | 15.65 | 15.76 |
| 20.05 | 15.53 | 15.42 | 15.34 | 15.30 | 15.20 | 15.27 | 15.24 | 15.32 | 15.41 | 15.50 | 15.60 |
| 20.61 | 15.75 | 15.63 | 15.54 | 15.55 | 15.47 | 15.44 | 15.45 | 15.50 | 15.57 | 15.64 | 15.72 |
| 21.22 | 15.53 | 15.44 | 15.32 | 15.30 | 15.29 | 15.33 | 15.25 | 15.35 | 15.40 | 15.54 | 15.66 |
| 21.87 | 15.37 | 15.23 | 15.19 | 15.12 | 15.10 | 15.07 | 15.06 | 15.17 | 15.25 | 15.31 | 15.36 |
| 22.57 | 15.85 | 15.73 | 15.65 | 15.61 | 15.54 | 15.50 | 15.55 | 15.59 | 15.68 | 15.76 | 15.85 |
| 23.33 | 15.60 | 15.44 | 15.33 | 15.28 | 15.25 | 15.26 | 15.22 | 15.23 | 15.23 | 15.30 | 15.41 |
| 24.15 | 16.08 | 15.93 | 15.83 | 15.73 | 15.64 | 15.66 | 15.64 | 15.67 | 15.72 | 15.73 | 15.86 |
| 25.03 | 15.90 | 15.70 | 15.57 | 15.51 | 15.52 | 15.41 | 15.46 | 15.50 | 15.52 | 15.57 | 15.65 |
| 25.98 | 15.61 | 15.42 | 15.47 | 15.39 | 15.40 | 15.34 | 15.38 | 15.43 | 15.59 | 15.64 | 15.72 |
| 27.01 | 15.70 | 15.61 | 15.56 | 15.56 | 15.56 | 15.60 | 15.58 | 15.64 | 15.66 | 15.79 | 15.92 |
| 28.11 | 15.59 | 15.42 | 15.32 | 15.33 | 15.25 | 15.22 | 15.26 | 15.21 | 15.32 | 15.43 | 15.53 |
| 29.3  | 15.94 | 15.80 | 15.78 | 15.74 | 15.68 | 15.65 | 15.66 | 15.69 | 15.70 | 15.77 | 15.92 |
| 30.59 | 15.63 | 15.48 | 15.40 | 15.37 | 15.31 | 15.33 | 15.26 | 15.30 | 15.39 | 15.44 | 15.51 |
| 31.98 | 15.90 | 15.71 | 15.66 | 15.55 | 15.57 | 15.55 | 15.52 | 15.56 | 15.61 | 15.71 | 15.79 |
| 33.47 | 16.10 | 15.88 | 15.79 | 15.78 | 15.69 | 15.62 | 15.64 | 15.64 | 15.66 | 15.81 | 15.83 |
| 35.09 | 16.08 | 15.91 | 15.89 | 15.80 | 15.74 | 15.68 | 15.67 | 15.66 | 15.74 | 15.85 | 15.96 |
| 36.83 | 16.21 | 16.06 | 15.96 | 15.89 | 15.84 | 15.81 | 15.79 | 15.82 | 15.82 | 15.91 | 16.06 |
| 38.71 | 16.49 | 16.32 | 16.20 | 16.13 | 16.12 | 16.04 | 16.02 | 16.06 | 16.04 | 16.14 | 16.25 |
| 40.73 | 16.38 | 16.27 | 16.07 | 16.05 | 16.02 | 15.96 | 15.89 | 15.91 | 15.98 | 16.02 | 16.19 |
| 42.92 | 17.09 | 16.89 | 16.78 | 16.68 | 16.60 | 16.56 | 16.51 | 16.50 | 16.51 | 16.54 | 16.58 |
| 45.27 | 16.40 | 16.23 | 16.08 | 16.02 | 15.96 | 15.91 | 15.90 | 15.91 | 15.95 | 16.04 | 16.10 |
| 47.81 | 16.75 | 16.60 | 16.49 | 16.42 | 16.42 | 16.35 | 16.36 | 16.36 | 16.36 | 16.48 | 16.58 |
| 50.55 | 16.75 | 16.55 | 16.43 | 16.30 | 16.28 | 16.25 | 16.10 | 16.18 | 16.18 | 16.20 | 16.26 |
| 53.51 | 16.96 | 16.79 | 16.62 | 16.51 | 16.46 | 16.46 | 16.42 | 16.40 | 16.38 | 16.49 | 16.53 |
| 56.69 | 17.23 | 17.06 | 16.88 | 16.79 | 16.72 | 16.60 | 16.62 | 16.58 | 16.56 | 16.60 | 16.64 |
| 60.13 | 17.11 | 16.96 | 16.82 | 16.74 | 16.64 | 16.58 | 16.51 | 16.48 | 16.50 | 16.57 | 16.63 |



|         |       |       |       |       |       |       |       |       |       |       |       |
|---------|-------|-------|-------|-------|-------|-------|-------|-------|-------|-------|-------|
| 63.84   | 17.43 | 17.24 | 17.09 | 17.00 | 16.89 | 16.78 | 16.77 | 16.80 | 16.77 | 16.83 | 16.83 |
| 67.83   | 17.62 | 17.49 | 17.37 | 17.24 | 17.19 | 17.11 | 17.10 | 17.03 | 17.05 | 17.08 | 17.15 |
| 72.15   | 17.81 | 17.58 | 17.49 | 17.32 | 17.24 | 17.11 | 17.10 | 17.08 | 17.10 | 17.09 | 17.12 |
| 76.8    | 17.56 | 17.36 | 17.24 | 17.11 | 17.05 | 16.97 | 16.85 | 16.83 | 16.76 | 16.81 | 16.87 |
| 81.81   | 17.76 | 17.57 | 17.45 | 17.33 | 17.22 | 17.06 | 17.02 | 16.97 | 16.99 | 17.02 | 17.02 |
| 87.22   | 17.93 | 17.72 | 17.53 | 17.39 | 17.30 | 17.27 | 17.20 | 17.14 | 17.09 | 17.08 | 17.15 |
| 93.06   | 18.66 | 18.37 | 18.24 | 18.16 | 18.03 | 17.89 | 17.73 | 17.66 | 17.66 | 17.67 | 17.70 |
| 99.35   | 19.32 | 19.02 | 18.87 | 18.73 | 18.60 | 18.43 | 18.37 | 18.23 | 18.14 | 18.12 | 18.12 |
| 106.13  | 19.05 | 18.77 | 18.62 | 18.46 | 18.23 | 18.18 | 17.99 | 17.96 | 17.95 | 17.80 | 17.82 |
| 113.45  | 19.28 | 19.00 | 18.81 | 18.60 | 18.48 | 18.35 | 18.25 | 18.15 | 18.10 | 18.03 | 18.02 |
| 121.34  | 19.03 | 18.83 | 18.71 | 18.53 | 18.38 | 18.30 | 18.21 | 18.06 | 17.94 | 18.02 | 18.01 |
| 129.86  | 19.78 | 19.48 | 19.27 | 19.11 | 19.00 | 18.83 | 18.71 | 18.52 | 18.53 | 18.49 | 18.52 |
| 139.04  | 20.38 | 20.15 | 19.87 | 19.70 | 19.50 | 19.30 | 19.15 | 19.02 | 18.99 | 18.89 | 18.82 |
| 148.94  | 20.90 | 20.64 | 20.34 | 20.14 | 19.97 | 19.82 | 19.63 | 19.48 | 19.36 | 19.32 | 19.29 |
| 159.62  | 20.54 | 20.29 | 19.98 | 19.79 | 19.59 | 19.40 | 19.27 | 19.15 | 19.01 | 18.92 | 18.90 |
| 171.14  | 20.89 | 20.54 | 20.34 | 20.08 | 19.94 | 19.71 | 19.54 | 19.34 | 19.30 | 19.21 | 19.11 |
| 183.56  | 21.03 | 20.76 | 20.53 | 20.30 | 20.16 | 19.90 | 19.69 | 19.53 | 19.41 | 19.36 | 19.31 |
| 196.96  | 21.92 | 21.58 | 21.32 | 21.04 | 20.83 | 20.61 | 20.40 | 20.18 | 20.07 | 19.97 | 19.90 |
| 211.41  | 22.29 | 21.91 | 21.66 | 21.30 | 21.09 | 20.87 | 20.66 | 20.52 | 20.40 | 20.25 | 20.10 |
| 226.99  | 23.31 | 22.93 | 22.62 | 22.30 | 22.01 | 21.78 | 21.57 | 21.38 | 21.17 | 21.04 | 20.87 |
| 243.8   | 22.91 | 22.53 | 22.15 | 21.85 | 21.68 | 21.40 | 21.13 | 20.91 | 20.71 | 20.57 | 20.48 |
| 261.93  | 23.67 | 23.32 | 22.98 | 22.64 | 22.41 | 22.13 | 21.89 | 21.61 | 21.38 | 21.28 | 21.10 |
| 281.48  | 23.82 | 23.54 | 23.16 | 22.85 | 22.52 | 22.22 | 21.95 | 21.71 | 21.56 | 21.30 | 21.14 |
| 302.56  | 24.53 | 24.11 | 23.72 | 23.44 | 23.18 | 22.86 | 22.57 | 22.29 | 22.07 | 21.84 | 21.75 |
| 325.3   | 24.89 | 24.48 | 24.13 | 23.75 | 23.43 | 23.10 | 22.88 | 22.56 | 22.28 | 22.07 | 21.93 |
| 349.83  | 24.61 | 24.19 | 23.80 | 23.50 | 23.12 | 22.85 | 22.50 | 22.23 | 22.01 | 21.81 | 21.60 |
| 376.28  | 25.75 | 25.27 | 24.83 | 24.45 | 24.15 | 23.83 | 23.44 | 23.15 | 22.84 | 22.61 | 22.40 |
| 404.81  | 25.86 | 25.35 | 25.01 | 24.64 | 24.25 | 23.93 | 23.53 | 23.24 | 22.94 | 22.65 | 22.53 |
| 435.58  | 26.40 | 25.91 | 25.51 | 25.06 | 24.72 | 24.33 | 23.97 | 23.64 | 23.34 | 23.11 | 22.93 |
| 468.76  | 27.08 | 26.57 | 26.12 | 25.71 | 25.32 | 24.94 | 24.49 | 24.15 | 23.90 | 23.62 | 23.31 |
| 504.55  | 27.47 | 27.02 | 26.55 | 26.15 | 25.68 | 25.29 | 24.90 | 24.53 | 24.14 | 23.88 | 23.60 |
| 543.15  | 27.54 | 27.06 | 26.62 | 26.18 | 25.74 | 25.31 | 24.84 | 24.54 | 24.24 | 23.92 | 23.60 |
| 584.78  | 28.01 | 27.51 | 26.99 | 26.60 | 26.10 | 25.69 | 25.29 | 24.89 | 24.56 | 24.20 | 23.85 |
| 629.68  | 28.58 | 28.03 | 27.51 | 27.02 | 26.65 | 26.20 | 25.70 | 25.28 | 24.91 | 24.59 | 24.27 |
| 678.1   | 28.38 | 27.85 | 27.33 | 26.85 | 26.38 | 25.88 | 25.45 | 25.07 | 24.63 | 24.29 | 23.94 |
| 730.33  | 29.12 | 28.54 | 28.07 | 27.57 | 27.10 | 26.68 | 26.16 | 25.75 | 25.34 | 25.01 | 24.61 |
| 786.65  | 29.28 | 28.70 | 28.17 | 27.70 | 27.24 | 26.76 | 26.30 | 25.91 | 25.47 | 25.14 | 24.79 |
| 847.4   | 29.62 | 28.98 | 28.53 | 28.00 | 27.50 | 27.01 | 26.59 | 26.11 | 25.67 | 25.34 | 24.98 |
| 912.92  | 29.36 | 28.80 | 28.29 | 27.77 | 27.22 | 26.78 | 26.26 | 25.85 | 25.46 | 25.09 | 24.67 |
| 983.58  | 29.21 | 28.68 | 28.07 | 27.62 | 27.18 | 26.62 | 26.16 | 25.71 | 25.30 | 24.92 | 24.56 |
| 1059.78 | 29.52 | 28.94 | 28.40 | 27.91 | 27.35 | 26.81 | 26.33 | 25.90 | 25.49 | 25.12 | 24.66 |
| 1141.98 | 29.40 | 28.78 | 28.25 | 27.80 | 27.29 | 26.74 | 26.28 | 25.79 | 25.44 | 25.04 | 24.66 |
| 1230.62 | 29.70 | 29.16 | 28.58 | 28.12 | 27.54 | 27.07 | 26.56 | 26.08 | 25.63 | 25.23 | 24.78 |
| 1326.23 | 30.30 | 29.69 | 29.16 | 28.56 | 28.09 | 27.60 | 27.04 | 26.56 | 26.10 | 25.66 | 25.30 |
| 1429.34 | 30.41 | 29.78 | 29.25 | 28.74 | 28.14 | 27.61 | 27.06 | 26.62 | 26.21 | 25.70 | 25.34 |
| 1540.54 | 30.21 | 29.59 | 29.05 | 28.50 | 27.92 | 27.46 | 26.96 | 26.45 | 26.02 | 25.61 | 25.19 |
| 1660.48 | 30.67 | 30.04 | 29.48 | 28.95 | 28.42 | 27.90 | 27.39 | 26.89 | 26.33 | 25.92 | 25.52 |
| 1789.83 | 30.75 | 30.16 | 29.53 | 29.08 | 28.48 | 27.97 | 27.45 | 26.94 | 26.49 | 26.10 | 25.68 |
| 1929.34 | 30.94 | 30.29 | 29.70 | 29.18 | 28.59 | 28.10 | 27.56 | 26.94 | 26.54 | 26.10 | 25.66 |
| 2079.8  | 30.19 | 29.63 | 29.07 | 28.49 | 27.99 | 27.43 | 26.96 | 26.48 | 26.09 | 25.61 | 25.19 |

|         |       |       |       |       |       |       |       |       |       |       |       |
|---------|-------|-------|-------|-------|-------|-------|-------|-------|-------|-------|-------|
| 2242.08 | 30.85 | 30.22 | 29.65 | 29.11 | 28.61 | 28.03 | 27.54 | 26.99 | 26.51 | 26.09 | 25.62 |
| 2417.1  | 30.34 | 29.70 | 29.13 | 28.58 | 28.07 | 27.56 | 27.01 | 26.49 | 26.01 | 25.56 | 25.14 |
| 2605.85 | 30.41 | 29.73 | 29.24 | 28.66 | 28.14 | 27.56 | 27.12 | 26.60 | 26.07 | 25.72 | 25.31 |
| 2809.43 | 30.17 | 29.58 | 28.96 | 28.48 | 27.94 | 27.41 | 26.89 | 26.34 | 25.88 | 25.54 | 25.08 |
| 3028.99 | 29.38 | 28.71 | 28.20 | 27.69 | 27.10 | 26.61 | 26.09 | 25.69 | 25.18 | 24.77 | 24.40 |
| 3265.79 | 29.65 | 29.01 | 28.41 | 27.89 | 27.38 | 26.84 | 26.34 | 25.80 | 25.35 | 24.92 | 24.54 |
| 3521.18 | 29.63 | 28.96 | 28.39 | 27.93 | 27.40 | 26.84 | 26.33 | 25.86 | 25.37 | 24.95 | 24.57 |
| 3796.62 | 29.99 | 29.41 | 28.83 | 28.30 | 27.74 | 27.19 | 26.71 | 26.16 | 25.73 | 25.34 | 24.92 |

| Wavelength (nm) \ Time (ps) | 630.58 | 631.99 | 633.40 | 634.81 | 636.22 | 637.63 | 639.04 | 640.44 | 641.85 | 643.26 | 644.67 |
|-----------------------------|--------|--------|--------|--------|--------|--------|--------|--------|--------|--------|--------|
| -3.28                       | 0.01   | 0.02   | 0.00   | 0.10   | -0.01  | -0.01  | 0.01   | 0.01   | -0.03  | -0.07  | -0.08  |
| -2.78                       | 0.02   | 0.00   | -0.02  | -0.02  | 0.06   | 0.01   | 0.01   | 0.08   | 0.01   | 0.10   | 0.06   |
| -2.28                       | -0.07  | -0.05  | -0.10  | -0.14  | -0.14  | -0.08  | -0.09  | -0.12  | -0.10  | -0.12  | -0.16  |
| -1.78                       | 0.09   | 0.12   | 0.13   | 0.11   | 0.07   | 0.05   | 0.08   | 0.07   | 0.09   | 0.07   | 0.00   |
| -1.28                       | 0.12   | 0.15   | 0.11   | 0.11   | 0.13   | 0.20   | 0.10   | 0.05   | 0.09   | 0.13   | 0.19   |
| -0.78                       | -0.12  | -0.14  | -0.09  | -0.14  | -0.09  | -0.17  | -0.15  | -0.15  | -0.07  | -0.11  | -0.09  |
| -0.28                       | -0.01  | 0.02   | 0.05   | 0.06   | 0.05   | 0.05   | 0.13   | 0.17   | 0.17   | 0.11   | 0.20   |
| 0.22                        | -0.04  | -0.12  | -0.09  | -0.09  | -0.08  | -0.04  | -0.09  | -0.12  | -0.16  | -0.11  | -0.12  |
| 0.32                        | 0.09   | 0.08   | 0.09   | 0.03   | -0.01  | -0.09  | -0.05  | -0.04  | -0.05  | -0.06  | 0.04   |
| 0.42                        | 0.17   | 0.14   | 0.12   | 0.14   | 0.10   | 0.10   | 0.09   | 0.13   | 0.15   | 0.11   | 0.11   |
| 0.52                        | 0.06   | 0.03   | 0.03   | 0.02   | 0.04   | 0.08   | 0.03   | 0.04   | 0.02   | 0.09   | 0.15   |
| 0.62                        | -0.07  | -0.06  | -0.04  | -0.02  | -0.08  | -0.05  | -0.03  | -0.01  | 0.00   | -0.05  | 0.00   |
| 0.72                        | 0.19   | 0.15   | 0.22   | 0.20   | 0.17   | 0.21   | 0.18   | 0.29   | 0.27   | 0.23   | 0.29   |
| 0.77                        | 0.15   | 0.12   | 0.09   | 0.13   | 0.09   | 0.15   | 0.06   | 0.07   | 0.13   | 0.09   | 0.11   |
| 0.82                        | -0.07  | -0.06  | -0.08  | -0.04  | -0.13  | -0.10  | -0.11  | -0.06  | -0.05  | -0.08  | -0.05  |
| 0.87                        | -0.10  | -0.06  | -0.03  | -0.05  | -0.02  | -0.07  | -0.04  | -0.04  | 0.03   | 0.01   | 0.04   |
| 0.92                        | 0.17   | 0.20   | 0.15   | 0.15   | 0.16   | 0.25   | 0.18   | 0.17   | 0.16   | 0.19   | 0.17   |
| 0.97                        | 0.21   | 0.21   | 0.17   | 0.14   | 0.17   | 0.12   | 0.14   | 0.14   | 0.10   | 0.11   | 0.10   |
| 1.02                        | -0.06  | -0.04  | -0.11  | -0.05  | -0.07  | -0.06  | -0.07  | -0.09  | -0.13  | -0.13  | -0.13  |
| 1.07                        | 0.12   | 0.00   | 0.05   | 0.05   | 0.11   | 0.14   | 0.08   | 0.06   | 0.02   | 0.05   | 0.08   |
| 1.12                        | 0.03   | 0.03   | -0.01  | 0.04   | 0.02   | 0.03   | 0.01   | 0.10   | 0.08   | 0.08   | 0.10   |
| 1.17                        | 0.21   | 0.23   | 0.13   | 0.16   | 0.06   | 0.16   | 0.28   | 0.25   | 0.21   | 0.18   | 0.21   |
| 1.22                        | 0.03   | -0.01  | 0.03   | -0.09  | -0.08  | 0.05   | -0.05  | -0.01  | -0.10  | -0.14  | -0.04  |
| 1.27                        | 0.11   | 0.10   | 0.06   | 0.12   | 0.12   | 0.10   | 0.02   | 0.04   | 0.08   | 0.09   | -0.01  |
| 1.32                        | 0.11   | 0.14   | 0.12   | 0.10   | 0.10   | 0.14   | 0.11   | 0.16   | 0.12   | 0.12   | 0.14   |
| 1.37                        | 0.06   | 0.05   | 0.01   | 0.03   | -0.01  | 0.03   | 0.05   | 0.09   | 0.01   | -0.01  | -0.02  |
| 1.42                        | 0.15   | 0.07   | 0.09   | 0.12   | 0.07   | 0.09   | 0.13   | 0.08   | 0.10   | 0.07   | 0.10   |
| 1.47                        | -0.01  | 0.05   | 0.03   | -0.01  | -0.05  | -0.01  | 0.01   | -0.03  | 0.02   | 0.00   | 0.00   |
| 1.52                        | -0.21  | -0.18  | -0.24  | -0.22  | -0.24  | -0.19  | -0.16  | -0.28  | -0.24  | -0.29  | -0.21  |
| 1.57                        | 0.89   | 0.79   | 0.76   | 0.66   | 0.62   | 0.64   | 0.60   | 0.50   | 0.33   | 0.26   | 0.25   |
| 1.62                        | 6.21   | 5.97   | 5.76   | 5.61   | 5.45   | 5.29   | 5.11   | 4.87   | 4.70   | 4.55   | 4.38   |
| 1.67                        | 18.18  | 17.97  | 17.86  | 17.75  | 17.68  | 17.59  | 17.47  | 17.33  | 17.21  | 17.01  | 16.80  |
| 1.72                        | 22.43  | 22.65  | 22.69  | 22.86  | 23.05  | 23.25  | 23.36  | 23.46  | 23.60  | 23.69  | 23.81  |
| 1.77                        | 20.90  | 21.19  | 21.42  | 21.76  | 21.99  | 22.33  | 22.61  | 22.85  | 23.11  | 23.43  | 23.67  |
| 1.82                        | 19.31  | 19.64  | 20.02  | 20.33  | 20.73  | 21.10  | 21.36  | 21.73  | 22.08  | 22.40  | 22.84  |
| 1.87                        | 17.49  | 17.79  | 18.15  | 18.60  | 18.92  | 19.29  | 19.68  | 20.11  | 20.46  | 20.82  | 21.23  |
| 1.92                        | 16.60  | 16.96  | 17.23  | 17.61  | 17.99  | 18.50  | 18.81  | 19.27  | 19.66  | 19.99  | 20.42  |

|      |       |       |       |       |       |       |       |       |       |       |       |
|------|-------|-------|-------|-------|-------|-------|-------|-------|-------|-------|-------|
| 1.97 | 15.91 | 16.18 | 16.54 | 16.85 | 17.26 | 17.65 | 18.07 | 18.45 | 18.81 | 19.21 | 19.69 |
| 2.02 | 15.48 | 15.79 | 16.11 | 16.47 | 16.82 | 17.22 | 17.51 | 17.95 | 18.35 | 18.81 | 19.14 |
| 2.07 | 15.55 | 15.82 | 16.14 | 16.46 | 16.82 | 17.19 | 17.51 | 17.93 | 18.29 | 18.67 | 19.14 |
| 2.12 | 15.00 | 15.28 | 15.53 | 15.84 | 16.15 | 16.60 | 16.95 | 17.30 | 17.63 | 18.04 | 18.41 |
| 2.17 | 14.78 | 15.05 | 15.35 | 15.68 | 16.01 | 16.34 | 16.64 | 17.06 | 17.42 | 17.74 | 18.16 |
| 2.22 | 14.76 | 15.03 | 15.32 | 15.56 | 15.89 | 16.21 | 16.59 | 16.97 | 17.33 | 17.58 | 18.03 |
| 2.27 | 14.88 | 15.18 | 15.51 | 15.80 | 16.11 | 16.39 | 16.70 | 17.08 | 17.46 | 17.94 | 18.28 |
| 2.32 | 15.32 | 15.50 | 15.75 | 16.06 | 16.39 | 16.71 | 17.08 | 17.38 | 17.71 | 18.05 | 18.48 |
| 2.37 | 15.01 | 15.30 | 15.51 | 15.89 | 16.11 | 16.45 | 16.75 | 17.15 | 17.43 | 17.82 | 18.19 |
| 2.42 | 14.91 | 15.15 | 15.34 | 15.71 | 16.01 | 16.32 | 16.60 | 17.02 | 17.38 | 17.69 | 18.17 |
| 2.47 | 14.96 | 15.22 | 15.40 | 15.70 | 15.99 | 16.29 | 16.59 | 16.88 | 17.33 | 17.65 | 18.00 |
| 2.52 | 14.75 | 14.93 | 15.16 | 15.48 | 15.69 | 16.07 | 16.33 | 16.68 | 17.04 | 17.41 | 17.74 |
| 2.57 | 14.94 | 15.15 | 15.34 | 15.63 | 15.94 | 16.20 | 16.50 | 16.83 | 17.15 | 17.43 | 17.93 |
| 2.62 | 15.02 | 15.21 | 15.46 | 15.72 | 16.00 | 16.33 | 16.53 | 16.86 | 17.27 | 17.54 | 17.91 |
| 2.67 | 14.89 | 15.12 | 15.32 | 15.63 | 15.92 | 16.26 | 16.47 | 16.85 | 17.13 | 17.50 | 17.86 |
| 2.72 | 14.69 | 14.90 | 15.11 | 15.43 | 15.74 | 16.03 | 16.25 | 16.56 | 16.84 | 17.25 | 17.64 |
| 2.77 | 15.06 | 15.26 | 15.45 | 15.74 | 15.99 | 16.30 | 16.51 | 16.87 | 17.30 | 17.59 | 17.93 |
| 2.82 | 14.92 | 15.16 | 15.37 | 15.60 | 15.83 | 16.11 | 16.34 | 16.73 | 17.10 | 17.39 | 17.73 |
| 2.87 | 15.09 | 15.28 | 15.52 | 15.70 | 16.00 | 16.25 | 16.54 | 16.80 | 17.12 | 17.38 | 17.71 |
| 2.92 | 15.18 | 15.32 | 15.53 | 15.79 | 16.04 | 16.34 | 16.51 | 16.84 | 17.21 | 17.57 | 17.80 |
| 2.97 | 15.42 | 15.57 | 15.79 | 16.01 | 16.30 | 16.54 | 16.82 | 17.09 | 17.41 | 17.67 | 18.04 |
| 3.02 | 15.11 | 15.33 | 15.54 | 15.74 | 15.96 | 16.30 | 16.53 | 16.90 | 17.18 | 17.46 | 17.79 |
| 3.07 | 14.94 | 15.06 | 15.34 | 15.55 | 15.80 | 16.02 | 16.28 | 16.58 | 16.85 | 17.20 | 17.54 |
| 3.12 | 15.68 | 15.84 | 16.03 | 16.22 | 16.52 | 16.79 | 17.06 | 17.31 | 17.62 | 17.97 | 18.30 |
| 3.17 | 15.14 | 15.30 | 15.40 | 15.65 | 15.85 | 16.05 | 16.30 | 16.61 | 16.96 | 17.19 | 17.50 |
| 3.22 | 15.19 | 15.30 | 15.54 | 15.79 | 16.02 | 16.30 | 16.47 | 16.72 | 17.07 | 17.39 | 17.75 |
| 3.27 | 14.91 | 15.12 | 15.29 | 15.51 | 15.71 | 15.96 | 16.20 | 16.43 | 16.80 | 17.12 | 17.40 |
| 3.32 | 15.28 | 15.36 | 15.51 | 15.78 | 16.01 | 16.30 | 16.38 | 16.66 | 16.93 | 17.31 | 17.66 |
| 3.37 | 15.22 | 15.40 | 15.60 | 15.80 | 16.00 | 16.25 | 16.47 | 16.74 | 16.99 | 17.34 | 17.65 |
| 3.42 | 15.09 | 15.38 | 15.41 | 15.63 | 15.86 | 16.09 | 16.33 | 16.65 | 16.96 | 17.21 | 17.50 |
| 3.47 | 15.08 | 15.18 | 15.37 | 15.56 | 15.82 | 16.01 | 16.29 | 16.51 | 16.88 | 17.10 | 17.46 |
| 3.52 | 15.47 | 15.59 | 15.71 | 16.03 | 16.25 | 16.47 | 16.66 | 16.97 | 17.25 | 17.56 | 17.89 |
| 3.57 | 15.03 | 15.22 | 15.34 | 15.55 | 15.82 | 16.04 | 16.25 | 16.62 | 16.83 | 17.12 | 17.40 |
| 3.62 | 15.28 | 15.40 | 15.64 | 15.83 | 16.01 | 16.24 | 16.47 | 16.69 | 16.96 | 17.26 | 17.57 |
| 3.67 | 15.57 | 15.67 | 15.86 | 16.03 | 16.24 | 16.47 | 16.70 | 16.99 | 17.25 | 17.51 | 17.79 |
| 3.72 | 15.47 | 15.63 | 15.79 | 15.96 | 16.15 | 16.43 | 16.58 | 16.84 | 17.12 | 17.32 | 17.65 |
| 3.92 | 15.04 | 15.19 | 15.37 | 15.54 | 15.75 | 16.04 | 16.24 | 16.40 | 16.73 | 16.89 | 17.26 |
| 4.12 | 15.45 | 15.52 | 15.68 | 15.83 | 16.01 | 16.28 | 16.51 | 16.73 | 16.90 | 17.19 | 17.46 |
| 4.32 | 15.63 | 15.72 | 15.92 | 16.22 | 16.34 | 16.54 | 16.77 | 16.99 | 17.35 | 17.54 | 17.87 |
| 4.52 | 15.80 | 15.87 | 16.06 | 16.22 | 16.45 | 16.62 | 16.82 | 17.07 | 17.26 | 17.56 | 17.85 |
| 4.72 | 15.79 | 15.89 | 16.00 | 16.16 | 16.34 | 16.50 | 16.69 | 16.94 | 17.17 | 17.37 | 17.65 |
| 4.92 | 15.81 | 15.84 | 15.98 | 16.19 | 16.45 | 16.61 | 16.80 | 17.11 | 17.33 | 17.56 | 17.89 |
| 5.12 | 16.01 | 16.12 | 16.31 | 16.45 | 16.68 | 16.89 | 17.04 | 17.35 | 17.58 | 17.85 | 18.18 |
| 5.32 | 16.09 | 16.19 | 16.26 | 16.49 | 16.63 | 16.89 | 17.09 | 17.34 | 17.53 | 17.87 | 18.10 |
| 5.52 | 15.83 | 15.99 | 16.08 | 16.24 | 16.41 | 16.62 | 16.92 | 17.19 | 17.42 | 17.66 | 17.92 |
| 5.72 | 16.03 | 16.19 | 16.30 | 16.51 | 16.78 | 16.93 | 17.11 | 17.40 | 17.68 | 17.89 | 18.24 |
| 5.92 | 16.08 | 16.20 | 16.33 | 16.48 | 16.69 | 16.89 | 17.07 | 17.34 | 17.67 | 17.87 | 18.12 |
| 6.12 | 15.66 | 15.88 | 16.02 | 16.25 | 16.45 | 16.65 | 16.82 | 17.12 | 17.37 | 17.66 | 17.93 |
| 6.32 | 15.80 | 15.91 | 15.97 | 16.22 | 16.38 | 16.58 | 16.76 | 16.99 | 17.30 | 17.51 | 17.83 |
| 6.52 | 15.84 | 15.99 | 16.22 | 16.38 | 16.53 | 16.70 | 16.90 | 17.10 | 17.38 | 17.61 | 17.93 |

|       |       |       |       |       |       |       |       |       |       |       |       |
|-------|-------|-------|-------|-------|-------|-------|-------|-------|-------|-------|-------|
| 6.72  | 16.05 | 16.16 | 16.33 | 16.49 | 16.72 | 16.89 | 17.05 | 17.34 | 17.62 | 17.84 | 18.14 |
| 6.92  | 15.76 | 15.91 | 16.03 | 16.24 | 16.40 | 16.61 | 16.79 | 17.00 | 17.33 | 17.54 | 17.87 |
| 7.12  | 15.28 | 15.44 | 15.51 | 15.60 | 15.83 | 15.97 | 16.15 | 16.56 | 16.73 | 16.98 | 17.22 |
| 7.32  | 16.06 | 16.21 | 16.27 | 16.50 | 16.75 | 16.89 | 17.09 | 17.31 | 17.52 | 17.74 | 18.11 |
| 7.52  | 15.68 | 15.79 | 15.86 | 16.19 | 16.28 | 16.54 | 16.78 | 16.98 | 17.28 | 17.52 | 17.80 |
| 7.72  | 15.72 | 15.92 | 15.98 | 16.17 | 16.33 | 16.63 | 16.90 | 17.11 | 17.41 | 17.66 | 17.88 |
| 7.92  | 16.00 | 16.17 | 16.26 | 16.38 | 16.51 | 16.89 | 17.08 | 17.34 | 17.55 | 17.79 | 18.14 |
| 8.12  | 15.82 | 15.94 | 16.04 | 16.27 | 16.44 | 16.63 | 16.82 | 17.06 | 17.31 | 17.51 | 17.86 |
| 8.32  | 15.75 | 15.87 | 16.03 | 16.27 | 16.46 | 16.64 | 16.87 | 17.08 | 17.44 | 17.68 | 18.00 |
| 8.52  | 15.84 | 15.96 | 16.17 | 16.35 | 16.44 | 16.71 | 16.91 | 17.18 | 17.51 | 17.78 | 18.05 |
| 8.72  | 15.67 | 15.85 | 15.96 | 16.17 | 16.35 | 16.59 | 16.82 | 17.04 | 17.26 | 17.56 | 17.92 |
| 8.92  | 16.01 | 16.10 | 16.25 | 16.44 | 16.65 | 16.87 | 17.05 | 17.33 | 17.58 | 17.94 | 18.24 |
| 9.12  | 16.21 | 16.28 | 16.39 | 16.59 | 16.82 | 17.01 | 17.29 | 17.50 | 17.79 | 18.07 | 18.42 |
| 9.32  | 16.27 | 16.36 | 16.43 | 16.66 | 16.91 | 17.06 | 17.29 | 17.56 | 17.84 | 18.08 | 18.34 |
| 9.52  | 16.25 | 16.35 | 16.47 | 16.73 | 16.89 | 17.18 | 17.41 | 17.63 | 17.75 | 18.06 | 18.43 |
| 9.72  | 16.02 | 16.15 | 16.31 | 16.52 | 16.72 | 16.97 | 17.20 | 17.52 | 17.77 | 18.11 | 18.30 |
| 9.92  | 16.03 | 16.17 | 16.33 | 16.45 | 16.71 | 16.92 | 17.14 | 17.39 | 17.69 | 17.92 | 18.18 |
| 10.12 | 15.79 | 15.93 | 16.08 | 16.27 | 16.46 | 16.71 | 16.90 | 17.18 | 17.44 | 17.74 | 18.03 |
| 10.32 | 16.01 | 16.11 | 16.28 | 16.46 | 16.63 | 16.87 | 17.02 | 17.33 | 17.61 | 17.81 | 18.10 |
| 10.52 | 15.69 | 15.82 | 16.06 | 16.25 | 16.46 | 16.68 | 16.91 | 17.15 | 17.45 | 17.66 | 18.01 |
| 10.72 | 15.47 | 15.53 | 15.78 | 15.96 | 16.12 | 16.34 | 16.56 | 16.82 | 17.08 | 17.39 | 17.64 |
| 10.92 | 16.05 | 16.12 | 16.24 | 16.51 | 16.71 | 16.93 | 17.13 | 17.35 | 17.64 | 17.98 | 18.26 |
| 11.12 | 15.92 | 16.05 | 16.24 | 16.36 | 16.58 | 16.80 | 17.01 | 17.29 | 17.55 | 17.85 | 18.12 |
| 11.32 | 15.78 | 15.92 | 16.07 | 16.27 | 16.49 | 16.73 | 16.92 | 17.22 | 17.46 | 17.79 | 18.03 |
| 11.52 | 15.67 | 15.81 | 15.91 | 16.04 | 16.26 | 16.55 | 16.70 | 17.03 | 17.27 | 17.50 | 17.79 |
| 11.72 | 15.52 | 15.61 | 15.87 | 16.01 | 16.21 | 16.46 | 16.70 | 16.96 | 17.30 | 17.57 | 17.84 |
| 11.92 | 14.95 | 15.10 | 15.27 | 15.49 | 15.63 | 15.83 | 16.08 | 16.36 | 16.57 | 16.84 | 17.13 |
| 12.12 | 15.12 | 15.27 | 15.43 | 15.58 | 15.73 | 15.98 | 16.16 | 16.49 | 16.79 | 17.03 | 17.35 |
| 12.32 | 15.65 | 15.72 | 15.84 | 16.11 | 16.30 | 16.54 | 16.76 | 16.94 | 17.26 | 17.60 | 17.97 |
| 12.52 | 15.98 | 16.03 | 16.14 | 16.40 | 16.60 | 16.76 | 17.01 | 17.30 | 17.53 | 17.85 | 18.15 |
| 12.72 | 15.94 | 16.05 | 16.18 | 16.41 | 16.63 | 16.86 | 17.11 | 17.42 | 17.60 | 17.91 | 18.22 |
| 12.92 | 15.79 | 15.86 | 16.09 | 16.24 | 16.50 | 16.71 | 16.88 | 17.11 | 17.45 | 17.75 | 18.01 |
| 13.12 | 15.62 | 15.74 | 15.92 | 16.17 | 16.36 | 16.58 | 16.73 | 17.05 | 17.35 | 17.60 | 17.91 |
| 13.32 | 16.11 | 16.29 | 16.40 | 16.62 | 16.88 | 17.06 | 17.33 | 17.61 | 17.93 | 18.14 | 18.47 |
| 13.52 | 15.90 | 16.03 | 16.19 | 16.38 | 16.63 | 16.82 | 16.97 | 17.30 | 17.57 | 17.83 | 18.24 |
| 13.72 | 16.07 | 16.20 | 16.34 | 16.57 | 16.72 | 16.94 | 17.15 | 17.39 | 17.65 | 17.94 | 18.27 |
| 13.92 | 15.96 | 16.21 | 16.39 | 16.52 | 16.71 | 16.95 | 17.22 | 17.52 | 17.81 | 18.02 | 18.42 |
| 14    | 15.55 | 15.76 | 15.87 | 16.14 | 16.31 | 16.54 | 16.76 | 17.07 | 17.36 | 17.69 | 17.92 |
| 14.08 | 15.76 | 15.87 | 16.02 | 16.18 | 16.47 | 16.77 | 16.98 | 17.23 | 17.53 | 17.79 | 18.09 |
| 14.17 | 15.38 | 15.46 | 15.62 | 15.79 | 15.97 | 16.29 | 16.48 | 16.80 | 17.07 | 17.26 | 17.61 |
| 14.27 | 15.97 | 16.08 | 16.26 | 16.44 | 16.72 | 16.89 | 17.05 | 17.42 | 17.70 | 17.95 | 18.30 |
| 14.38 | 15.78 | 15.88 | 16.00 | 16.24 | 16.46 | 16.67 | 16.90 | 17.18 | 17.45 | 17.69 | 18.03 |
| 14.49 | 15.58 | 15.77 | 15.90 | 16.12 | 16.35 | 16.57 | 16.70 | 17.01 | 17.22 | 17.58 | 17.86 |
| 14.61 | 15.83 | 16.00 | 16.24 | 16.41 | 16.69 | 16.88 | 17.12 | 17.40 | 17.71 | 17.98 | 18.36 |
| 14.75 | 15.82 | 16.01 | 16.16 | 16.31 | 16.51 | 16.74 | 17.00 | 17.35 | 17.62 | 17.81 | 18.17 |
| 14.89 | 15.95 | 16.07 | 16.22 | 16.42 | 16.62 | 16.92 | 17.14 | 17.40 | 17.68 | 18.01 | 18.32 |
| 15.05 | 16.30 | 16.39 | 16.56 | 16.73 | 16.98 | 17.24 | 17.47 | 17.67 | 17.95 | 18.27 | 18.60 |
| 15.21 | 15.61 | 15.74 | 15.92 | 16.13 | 16.35 | 16.54 | 16.78 | 17.05 | 17.38 | 17.62 | 17.93 |
| 15.39 | 15.73 | 15.90 | 16.08 | 16.24 | 16.42 | 16.72 | 16.92 | 17.24 | 17.54 | 17.79 | 18.08 |
| 15.59 | 15.77 | 15.87 | 16.03 | 16.30 | 16.50 | 16.75 | 16.98 | 17.23 | 17.56 | 17.81 | 18.10 |

|        |       |       |       |       |       |       |       |       |       |       |       |
|--------|-------|-------|-------|-------|-------|-------|-------|-------|-------|-------|-------|
| 15.8   | 15.43 | 15.57 | 15.72 | 16.02 | 16.22 | 16.39 | 16.62 | 16.84 | 17.17 | 17.47 | 17.76 |
| 16.02  | 15.61 | 15.73 | 15.92 | 16.14 | 16.33 | 16.60 | 16.79 | 17.06 | 17.26 | 17.61 | 17.94 |
| 16.27  | 15.95 | 16.05 | 16.19 | 16.45 | 16.65 | 16.85 | 17.02 | 17.39 | 17.59 | 17.86 | 18.22 |
| 16.53  | 15.71 | 15.85 | 16.00 | 16.26 | 16.43 | 16.68 | 16.85 | 17.12 | 17.42 | 17.73 | 18.02 |
| 16.81  | 15.76 | 15.97 | 16.05 | 16.26 | 16.47 | 16.72 | 17.05 | 17.28 | 17.56 | 17.78 | 18.19 |
| 17.12  | 15.63 | 15.73 | 15.90 | 16.13 | 16.32 | 16.57 | 16.79 | 17.06 | 17.39 | 17.66 | 17.99 |
| 17.45  | 15.86 | 16.05 | 16.20 | 16.40 | 16.60 | 16.90 | 17.06 | 17.41 | 17.69 | 17.90 | 18.32 |
| 17.81  | 15.90 | 16.01 | 16.22 | 16.39 | 16.58 | 16.83 | 17.05 | 17.36 | 17.57 | 17.86 | 18.20 |
| 18.19  | 15.75 | 15.88 | 16.05 | 16.26 | 16.44 | 16.70 | 16.86 | 17.20 | 17.45 | 17.75 | 17.98 |
| 18.6   | 15.53 | 15.67 | 15.78 | 16.02 | 16.28 | 16.50 | 16.76 | 16.99 | 17.23 | 17.57 | 17.91 |
| 19.05  | 15.88 | 16.03 | 16.26 | 16.46 | 16.66 | 16.85 | 17.17 | 17.39 | 17.70 | 17.99 | 18.31 |
| 19.53  | 15.85 | 15.99 | 16.21 | 16.40 | 16.60 | 16.84 | 17.00 | 17.31 | 17.65 | 17.92 | 18.21 |
| 20.05  | 15.70 | 15.85 | 16.04 | 16.29 | 16.53 | 16.75 | 16.88 | 17.27 | 17.49 | 17.78 | 18.15 |
| 20.61  | 15.86 | 16.03 | 16.14 | 16.41 | 16.58 | 16.81 | 17.05 | 17.36 | 17.61 | 17.85 | 18.27 |
| 21.22  | 15.78 | 15.87 | 16.01 | 16.25 | 16.48 | 16.68 | 16.95 | 17.23 | 17.50 | 17.83 | 18.17 |
| 21.87  | 15.56 | 15.67 | 15.83 | 16.01 | 16.29 | 16.55 | 16.77 | 17.04 | 17.31 | 17.62 | 17.89 |
| 22.57  | 16.02 | 16.15 | 16.30 | 16.55 | 16.73 | 16.94 | 17.17 | 17.45 | 17.78 | 18.09 | 18.38 |
| 23.33  | 15.59 | 15.72 | 15.80 | 15.96 | 16.16 | 16.41 | 16.65 | 16.89 | 17.24 | 17.47 | 17.77 |
| 24.15  | 15.96 | 16.13 | 16.25 | 16.42 | 16.57 | 16.82 | 17.05 | 17.40 | 17.66 | 17.91 | 18.15 |
| 25.03  | 15.74 | 15.88 | 16.06 | 16.27 | 16.40 | 16.68 | 16.90 | 17.19 | 17.55 | 17.76 | 18.07 |
| 25.98  | 15.89 | 15.98 | 16.20 | 16.48 | 16.68 | 16.97 | 17.07 | 17.40 | 17.67 | 17.94 | 18.32 |
| 27.01  | 16.09 | 16.25 | 16.42 | 16.57 | 16.82 | 17.14 | 17.35 | 17.66 | 17.93 | 18.23 | 18.59 |
| 28.11  | 15.59 | 15.69 | 15.94 | 16.14 | 16.28 | 16.56 | 16.77 | 17.05 | 17.35 | 17.60 | 17.94 |
| 29.3   | 16.05 | 16.21 | 16.35 | 16.49 | 16.66 | 16.97 | 17.22 | 17.52 | 17.82 | 18.09 | 18.41 |
| 30.59  | 15.62 | 15.77 | 15.95 | 16.07 | 16.33 | 16.53 | 16.78 | 17.04 | 17.29 | 17.59 | 17.91 |
| 31.98  | 15.88 | 16.02 | 16.18 | 16.42 | 16.67 | 16.86 | 17.08 | 17.28 | 17.57 | 17.87 | 18.25 |
| 33.47  | 15.89 | 16.02 | 16.21 | 16.42 | 16.61 | 16.80 | 17.03 | 17.22 | 17.54 | 17.84 | 18.16 |
| 35.09  | 16.01 | 16.10 | 16.26 | 16.52 | 16.72 | 16.88 | 17.10 | 17.40 | 17.69 | 17.92 | 18.27 |
| 36.83  | 16.17 | 16.32 | 16.43 | 16.68 | 16.83 | 17.05 | 17.31 | 17.63 | 17.90 | 18.20 | 18.53 |
| 38.71  | 16.35 | 16.39 | 16.54 | 16.74 | 16.93 | 17.19 | 17.33 | 17.61 | 17.86 | 18.13 | 18.46 |
| 40.73  | 16.21 | 16.32 | 16.44 | 16.68 | 16.86 | 17.04 | 17.28 | 17.52 | 17.87 | 18.06 | 18.34 |
| 42.92  | 16.72 | 16.89 | 16.92 | 17.14 | 17.25 | 17.46 | 17.72 | 18.01 | 18.17 | 18.41 | 18.68 |
| 45.27  | 16.21 | 16.30 | 16.41 | 16.63 | 16.86 | 17.11 | 17.28 | 17.50 | 17.82 | 18.11 | 18.51 |
| 47.81  | 16.65 | 16.81 | 16.96 | 17.03 | 17.25 | 17.49 | 17.63 | 17.96 | 18.24 | 18.47 | 18.75 |
| 50.55  | 16.40 | 16.54 | 16.61 | 16.79 | 16.97 | 17.13 | 17.38 | 17.65 | 17.89 | 18.15 | 18.48 |
| 53.51  | 16.67 | 16.70 | 16.81 | 16.98 | 17.16 | 17.39 | 17.63 | 17.87 | 18.10 | 18.28 | 18.57 |
| 56.69  | 16.79 | 16.86 | 16.97 | 17.14 | 17.31 | 17.58 | 17.79 | 18.02 | 18.27 | 18.55 | 18.77 |
| 60.13  | 16.73 | 16.75 | 16.81 | 17.03 | 17.28 | 17.48 | 17.59 | 17.79 | 18.02 | 18.32 | 18.62 |
| 63.84  | 16.94 | 17.02 | 17.13 | 17.31 | 17.41 | 17.59 | 17.82 | 18.04 | 18.24 | 18.51 | 18.76 |
| 67.83  | 17.21 | 17.27 | 17.45 | 17.59 | 17.70 | 17.95 | 18.13 | 18.34 | 18.59 | 18.84 | 19.10 |
| 72.15  | 17.14 | 17.20 | 17.35 | 17.46 | 17.69 | 17.85 | 18.06 | 18.22 | 18.47 | 18.66 | 18.98 |
| 76.8   | 16.93 | 16.97 | 17.05 | 17.29 | 17.38 | 17.56 | 17.77 | 17.93 | 18.15 | 18.43 | 18.58 |
| 81.81  | 17.10 | 17.06 | 17.21 | 17.39 | 17.50 | 17.74 | 17.88 | 18.08 | 18.30 | 18.54 | 18.82 |
| 87.22  | 17.18 | 17.30 | 17.38 | 17.56 | 17.65 | 17.86 | 17.97 | 18.23 | 18.51 | 18.59 | 18.90 |
| 93.06  | 17.66 | 17.74 | 17.78 | 17.95 | 18.06 | 18.20 | 18.34 | 18.53 | 18.79 | 19.01 | 19.21 |
| 99.35  | 18.13 | 18.23 | 18.27 | 18.40 | 18.47 | 18.65 | 18.72 | 18.95 | 19.15 | 19.37 | 19.56 |
| 106.13 | 17.85 | 17.88 | 17.98 | 18.01 | 18.16 | 18.22 | 18.43 | 18.59 | 18.79 | 18.91 | 19.11 |
| 113.45 | 18.04 | 18.12 | 18.14 | 18.23 | 18.40 | 18.45 | 18.65 | 18.83 | 18.94 | 19.17 | 19.35 |
| 121.34 | 18.00 | 18.01 | 18.06 | 18.12 | 18.29 | 18.48 | 18.62 | 18.75 | 18.97 | 19.02 | 19.25 |
| 129.86 | 18.49 | 18.50 | 18.49 | 18.54 | 18.70 | 18.81 | 18.97 | 19.11 | 19.18 | 19.34 | 19.59 |

|         |       |       |       |       |       |       |       |       |       |       |       |
|---------|-------|-------|-------|-------|-------|-------|-------|-------|-------|-------|-------|
| 139.04  | 18.84 | 18.79 | 18.80 | 18.86 | 18.84 | 19.03 | 19.08 | 19.25 | 19.44 | 19.53 | 19.67 |
| 148.94  | 19.21 | 19.22 | 19.21 | 19.25 | 19.40 | 19.45 | 19.56 | 19.65 | 19.85 | 19.99 | 20.11 |
| 159.62  | 18.83 | 18.80 | 18.77 | 18.82 | 18.97 | 19.03 | 19.09 | 19.22 | 19.29 | 19.45 | 19.60 |
| 171.14  | 19.02 | 19.02 | 18.96 | 19.05 | 19.10 | 19.22 | 19.26 | 19.39 | 19.51 | 19.58 | 19.81 |
| 183.56  | 19.29 | 19.26 | 19.24 | 19.31 | 19.34 | 19.37 | 19.47 | 19.55 | 19.73 | 19.90 | 19.95 |
| 196.96  | 19.80 | 19.69 | 19.69 | 19.74 | 19.71 | 19.79 | 19.86 | 19.99 | 20.01 | 20.21 | 20.35 |
| 211.41  | 20.04 | 20.01 | 19.96 | 20.01 | 20.01 | 19.98 | 20.02 | 20.13 | 20.23 | 20.31 | 20.52 |
| 226.99  | 20.73 | 20.69 | 20.66 | 20.61 | 20.57 | 20.56 | 20.56 | 20.63 | 20.81 | 20.83 | 21.00 |
| 243.8   | 20.40 | 20.25 | 20.23 | 20.13 | 20.15 | 20.16 | 20.18 | 20.28 | 20.31 | 20.33 | 20.49 |
| 261.93  | 20.99 | 20.90 | 20.72 | 20.64 | 20.64 | 20.64 | 20.70 | 20.73 | 20.78 | 20.79 | 20.79 |
| 281.48  | 20.98 | 20.86 | 20.78 | 20.66 | 20.65 | 20.61 | 20.66 | 20.64 | 20.64 | 20.68 | 20.76 |
| 302.56  | 21.59 | 21.35 | 21.20 | 21.18 | 21.13 | 21.13 | 21.12 | 21.09 | 21.14 | 21.15 | 21.18 |
| 325.3   | 21.71 | 21.52 | 21.39 | 21.33 | 21.33 | 21.23 | 21.15 | 21.17 | 21.14 | 21.11 | 21.20 |
| 349.83  | 21.41 | 21.29 | 21.08 | 20.95 | 20.91 | 20.88 | 20.82 | 20.80 | 20.82 | 20.79 | 20.87 |
| 376.28  | 22.23 | 22.03 | 21.86 | 21.79 | 21.68 | 21.62 | 21.61 | 21.55 | 21.50 | 21.48 | 21.49 |
| 404.81  | 22.30 | 22.04 | 21.87 | 21.72 | 21.59 | 21.56 | 21.50 | 21.45 | 21.40 | 21.31 | 21.40 |
| 435.58  | 22.69 | 22.51 | 22.29 | 22.16 | 22.10 | 21.98 | 21.95 | 21.82 | 21.82 | 21.76 | 21.73 |
| 468.76  | 23.07 | 22.86 | 22.58 | 22.46 | 22.35 | 22.34 | 22.11 | 22.10 | 21.97 | 21.88 | 21.90 |
| 504.55  | 23.30 | 23.02 | 22.82 | 22.66 | 22.50 | 22.40 | 22.20 | 22.10 | 22.00 | 21.97 | 21.96 |
| 543.15  | 23.27 | 23.11 | 22.81 | 22.68 | 22.45 | 22.34 | 22.24 | 22.07 | 21.94 | 21.90 | 21.82 |
| 584.78  | 23.59 | 23.29 | 23.08 | 22.92 | 22.72 | 22.53 | 22.40 | 22.40 | 22.16 | 22.10 | 22.06 |
| 629.68  | 23.95 | 23.66 | 23.40 | 23.25 | 22.99 | 22.82 | 22.69 | 22.58 | 22.44 | 22.31 | 22.20 |
| 678.1   | 23.63 | 23.29 | 23.00 | 22.84 | 22.62 | 22.37 | 22.29 | 22.17 | 22.00 | 21.83 | 21.74 |
| 730.33  | 24.29 | 24.05 | 23.68 | 23.47 | 23.24 | 23.10 | 22.92 | 22.72 | 22.65 | 22.43 | 22.33 |
| 786.65  | 24.43 | 24.08 | 23.82 | 23.65 | 23.38 | 23.12 | 22.92 | 22.86 | 22.69 | 22.51 | 22.41 |
| 847.4   | 24.64 | 24.23 | 23.97 | 23.69 | 23.56 | 23.36 | 23.14 | 22.95 | 22.80 | 22.64 | 22.52 |
| 912.92  | 24.36 | 24.07 | 23.71 | 23.48 | 23.25 | 23.03 | 22.84 | 22.67 | 22.46 | 22.33 | 22.25 |
| 983.58  | 24.10 | 23.76 | 23.45 | 23.29 | 23.02 | 22.81 | 22.66 | 22.47 | 22.28 | 22.06 | 21.94 |
| 1059.78 | 24.35 | 23.96 | 23.68 | 23.43 | 23.18 | 22.96 | 22.72 | 22.53 | 22.35 | 22.20 | 22.02 |
| 1141.98 | 24.26 | 23.90 | 23.59 | 23.32 | 23.03 | 22.76 | 22.61 | 22.40 | 22.26 | 22.03 | 21.82 |
| 1230.62 | 24.42 | 24.04 | 23.66 | 23.41 | 23.17 | 22.93 | 22.74 | 22.50 | 22.32 | 22.09 | 21.99 |
| 1326.23 | 24.90 | 24.52 | 24.25 | 23.85 | 23.68 | 23.45 | 23.19 | 22.95 | 22.73 | 22.57 | 22.42 |
| 1429.34 | 24.95 | 24.55 | 24.15 | 23.91 | 23.73 | 23.44 | 23.17 | 22.97 | 22.76 | 22.57 | 22.32 |
| 1540.54 | 24.87 | 24.43 | 24.17 | 23.89 | 23.64 | 23.39 | 23.04 | 22.86 | 22.70 | 22.50 | 22.32 |
| 1660.48 | 25.13 | 24.77 | 24.42 | 24.01 | 23.76 | 23.54 | 23.24 | 23.08 | 22.84 | 22.60 | 22.46 |
| 1789.83 | 25.30 | 24.93 | 24.53 | 24.29 | 23.95 | 23.74 | 23.49 | 23.20 | 23.01 | 22.77 | 22.67 |
| 1929.34 | 25.23 | 24.87 | 24.48 | 24.21 | 23.88 | 23.58 | 23.30 | 23.11 | 22.94 | 22.73 | 22.47 |
| 2079.8  | 24.79 | 24.49 | 24.12 | 23.87 | 23.57 | 23.30 | 23.03 | 22.85 | 22.69 | 22.41 | 22.29 |
| 2242.08 | 25.26 | 24.82 | 24.46 | 24.19 | 23.89 | 23.69 | 23.40 | 23.11 | 22.87 | 22.68 | 22.51 |
| 2417.1  | 24.73 | 24.43 | 24.03 | 23.73 | 23.36 | 23.17 | 22.90 | 22.70 | 22.51 | 22.27 | 22.02 |
| 2605.85 | 24.94 | 24.54 | 24.16 | 23.89 | 23.60 | 23.35 | 23.18 | 22.94 | 22.66 | 22.50 | 22.30 |
| 2809.43 | 24.64 | 24.31 | 23.91 | 23.62 | 23.34 | 23.12 | 22.84 | 22.59 | 22.32 | 22.19 | 22.06 |
| 3028.99 | 23.92 | 23.59 | 23.27 | 23.02 | 22.72 | 22.44 | 22.19 | 22.04 | 21.78 | 21.61 | 21.47 |
| 3265.79 | 24.16 | 23.77 | 23.39 | 23.09 | 22.80 | 22.52 | 22.32 | 22.04 | 21.81 | 21.60 | 21.46 |
| 3521.18 | 24.22 | 23.81 | 23.49 | 23.19 | 22.92 | 22.66 | 22.37 | 22.12 | 21.95 | 21.74 | 21.50 |
| 3796.62 | 24.48 | 24.08 | 23.72 | 23.45 | 23.13 | 22.86 | 22.61 | 22.39 | 22.16 | 21.98 | 21.81 |

| Wavelength<br>(nm)<br>Time<br>(ps) | 646.08 | 647.49 | 648.90 | 650.30 | 651.71 | 653.12 | 654.53 | 655.94 | 657.35 | 658.76 | 660.16 |
|------------------------------------|--------|--------|--------|--------|--------|--------|--------|--------|--------|--------|--------|
| -3.28                              | -0.03  | -0.02  | -0.05  | -0.07  | 0.01   | -0.07  | -0.15  | -0.10  | -0.11  | -0.11  | -0.12  |
| -2.78                              | -0.01  | 0.01   | 0.05   | 0.06   | 0.09   | -0.04  | -0.02  | 0.02   | 0.07   | 0.09   | 0.04   |
| -2.28                              | -0.10  | -0.11  | -0.11  | -0.18  | -0.14  | -0.12  | -0.07  | -0.09  | -0.10  | -0.08  | -0.09  |
| -1.78                              | 0.02   | 0.07   | 0.05   | 0.07   | 0.00   | 0.03   | -0.01  | 0.02   | 0.09   | 0.02   | 0.04   |
| -1.28                              | 0.14   | 0.05   | 0.11   | 0.09   | 0.08   | 0.09   | 0.08   | 0.12   | 0.10   | 0.05   | 0.03   |
| -0.78                              | -0.06  | -0.05  | -0.10  | -0.01  | -0.05  | -0.02  | -0.03  | -0.11  | -0.09  | -0.06  | -0.06  |
| -0.28                              | 0.15   | 0.21   | 0.16   | 0.14   | 0.16   | 0.20   | 0.32   | 0.22   | 0.20   | 0.18   | 0.24   |
| 0.22                               | -0.12  | -0.16  | -0.11  | -0.11  | -0.15  | -0.08  | -0.10  | -0.07  | -0.16  | -0.09  | -0.07  |
| 0.32                               | -0.03  | -0.05  | -0.09  | -0.10  | -0.14  | -0.09  | -0.11  | -0.12  | -0.18  | -0.14  | -0.17  |
| 0.42                               | 0.15   | 0.15   | 0.10   | 0.11   | 0.11   | 0.04   | 0.01   | 0.04   | -0.05  | -0.07  | -0.06  |
| 0.52                               | 0.14   | 0.06   | 0.10   | 0.11   | 0.10   | 0.12   | 0.09   | 0.02   | 0.08   | 0.10   | 0.16   |
| 0.62                               | 0.01   | 0.00   | 0.00   | -0.05  | 0.01   | -0.02  | -0.09  | -0.12  | -0.18  | -0.15  | -0.15  |
| 0.72                               | 0.17   | 0.17   | 0.12   | 0.24   | 0.10   | 0.15   | -0.02  | 0.05   | 0.10   | 0.01   | -0.01  |
| 0.77                               | 0.06   | -0.08  | -0.15  | -0.09  | -0.10  | 0.05   | -0.09  | -0.13  | -0.25  | -0.18  | -0.11  |
| 0.82                               | -0.06  | -0.08  | -0.12  | -0.04  | 0.02   | -0.07  | -0.07  | -0.03  | 0.02   | 0.08   | 0.03   |
| 0.87                               | -0.03  | -0.01  | 0.03   | 0.03   | 0.00   | 0.08   | 0.03   | 0.06   | 0.05   | 0.04   | 0.08   |
| 0.92                               | 0.19   | 0.14   | 0.09   | 0.06   | 0.06   | 0.03   | 0.02   | 0.00   | 0.03   | 0.05   | 0.06   |
| 0.97                               | 0.16   | 0.03   | 0.04   | -0.02  | 0.05   | -0.02  | -0.02  | -0.12  | -0.06  | -0.11  | -0.12  |
| 1.02                               | -0.23  | -0.25  | -0.20  | -0.17  | -0.20  | -0.21  | -0.20  | -0.25  | -0.16  | -0.22  | -0.17  |
| 1.07                               | 0.08   | 0.11   | 0.10   | 0.03   | 0.10   | -0.03  | 0.10   | 0.10   | 0.07   | 0.02   | 0.01   |
| 1.12                               | 0.06   | 0.06   | 0.04   | 0.20   | 0.13   | 0.11   | 0.09   | 0.03   | 0.10   | 0.10   | 0.02   |
| 1.17                               | 0.21   | 0.24   | 0.18   | 0.16   | 0.14   | 0.13   | 0.07   | 0.06   | 0.08   | 0.07   | 0.01   |
| 1.22                               | -0.12  | -0.04  | -0.12  | -0.12  | -0.13  | -0.12  | -0.18  | -0.18  | -0.11  | -0.13  | -0.11  |
| 1.27                               | 0.04   | 0.01   | 0.01   | -0.03  | 0.05   | -0.05  | -0.12  | -0.04  | -0.11  | -0.11  | -0.12  |
| 1.32                               | 0.14   | 0.11   | 0.06   | 0.08   | 0.05   | 0.05   | 0.06   | 0.09   | 0.11   | 0.02   | 0.02   |
| 1.37                               | 0.05   | 0.01   | 0.01   | 0.06   | 0.03   | 0.05   | 0.00   | 0.02   | 0.06   | -0.04  | -0.02  |
| 1.42                               | 0.08   | 0.06   | 0.01   | -0.01  | 0.01   | 0.03   | -0.02  | -0.13  | -0.11  | -0.07  | -0.07  |
| 1.47                               | 0.00   | -0.03  | -0.05  | -0.02  | -0.10  | -0.08  | -0.05  | -0.07  | -0.09  | -0.20  | -0.17  |
| 1.52                               | -0.32  | -0.28  | -0.28  | -0.30  | -0.25  | -0.30  | -0.21  | -0.26  | -0.25  | -0.28  | -0.17  |
| 1.57                               | 0.28   | 0.21   | 0.05   | 0.01   | 0.01   | 0.00   | -0.02  | -0.01  | -0.01  | -0.07  | -0.02  |
| 1.62                               | 4.16   | 3.88   | 3.65   | 3.45   | 3.31   | 3.12   | 2.94   | 2.74   | 2.64   | 2.50   | 2.43   |
| 1.67                               | 16.51  | 16.29  | 15.91  | 15.61  | 15.24  | 14.94  | 14.53  | 14.13  | 13.68  | 13.34  | 13.09  |
| 1.72                               | 23.84  | 23.84  | 23.79  | 23.69  | 23.56  | 23.33  | 23.22  | 23.05  | 22.95  | 22.73  | 22.55  |
| 1.77                               | 23.96  | 24.02  | 24.26  | 24.49  | 24.60  | 24.69  | 24.78  | 24.84  | 24.93  | 24.93  | 25.03  |
| 1.82                               | 23.12  | 23.45  | 23.77  | 24.08  | 24.39  | 24.62  | 24.86  | 25.06  | 25.36  | 25.59  | 25.79  |
| 1.87                               | 21.62  | 22.05  | 22.28  | 22.72  | 23.08  | 23.42  | 23.68  | 24.07  | 24.36  | 24.60  | 24.97  |
| 1.92                               | 20.89  | 21.25  | 21.70  | 22.00  | 22.45  | 22.78  | 23.17  | 23.64  | 24.01  | 24.40  | 24.78  |
| 1.97                               | 20.11  | 20.49  | 20.85  | 21.25  | 21.76  | 22.22  | 22.56  | 22.99  | 23.36  | 23.84  | 24.24  |
| 2.02                               | 19.54  | 19.93  | 20.41  | 20.91  | 21.34  | 21.67  | 22.13  | 22.60  | 23.10  | 23.56  | 23.97  |
| 2.07                               | 19.48  | 19.92  | 20.32  | 20.77  | 21.11  | 21.59  | 22.02  | 22.49  | 23.02  | 23.42  | 23.98  |
| 2.12                               | 18.91  | 19.32  | 19.61  | 20.08  | 20.38  | 20.90  | 21.30  | 21.77  | 22.21  | 22.58  | 23.04  |
| 2.17                               | 18.54  | 18.94  | 19.43  | 19.80  | 20.21  | 20.65  | 21.00  | 21.50  | 21.95  | 22.25  | 22.67  |
| 2.22                               | 18.41  | 18.82  | 19.15  | 19.63  | 19.99  | 20.35  | 20.80  | 21.17  | 21.65  | 22.01  | 22.49  |
| 2.27                               | 18.68  | 19.05  | 19.48  | 19.86  | 20.32  | 20.76  | 21.16  | 21.62  | 22.13  | 22.52  | 22.97  |
| 2.32                               | 18.95  | 19.30  | 19.63  | 20.05  | 20.46  | 20.87  | 21.34  | 21.79  | 22.30  | 22.69  | 23.21  |
| 2.37                               | 18.57  | 18.98  | 19.36  | 19.86  | 20.16  | 20.66  | 21.02  | 21.46  | 21.95  | 22.41  | 22.77  |
| 2.42                               | 18.49  | 18.87  | 19.25  | 19.61  | 20.16  | 20.49  | 20.91  | 21.38  | 21.69  | 22.12  | 22.58  |

|      |       |       |       |       |       |       |       |       |       |       |       |
|------|-------|-------|-------|-------|-------|-------|-------|-------|-------|-------|-------|
| 2.47 | 18.39 | 18.66 | 19.19 | 19.51 | 20.01 | 20.35 | 20.73 | 21.14 | 21.65 | 22.02 | 22.44 |
| 2.52 | 18.14 | 18.52 | 18.86 | 19.28 | 19.83 | 20.11 | 20.51 | 20.91 | 21.33 | 21.75 | 22.29 |
| 2.57 | 18.27 | 18.65 | 18.99 | 19.36 | 19.81 | 20.24 | 20.70 | 21.19 | 21.55 | 21.91 | 22.39 |
| 2.62 | 18.30 | 18.66 | 18.98 | 19.39 | 19.86 | 20.30 | 20.63 | 21.09 | 21.56 | 21.92 | 22.47 |
| 2.67 | 18.28 | 18.66 | 18.99 | 19.38 | 19.85 | 20.25 | 20.68 | 21.05 | 21.48 | 21.88 | 22.31 |
| 2.72 | 18.04 | 18.31 | 18.68 | 19.09 | 19.51 | 19.93 | 20.37 | 20.72 | 21.09 | 21.51 | 21.96 |
| 2.77 | 18.30 | 18.65 | 19.05 | 19.38 | 19.81 | 20.16 | 20.58 | 20.96 | 21.40 | 21.80 | 22.24 |
| 2.82 | 18.02 | 18.44 | 18.85 | 19.30 | 19.71 | 20.09 | 20.52 | 20.94 | 21.37 | 21.77 | 22.25 |
| 2.87 | 18.12 | 18.49 | 18.89 | 19.28 | 19.54 | 19.99 | 20.39 | 20.78 | 21.28 | 21.65 | 22.07 |
| 2.92 | 18.17 | 18.60 | 18.94 | 19.36 | 19.70 | 20.14 | 20.51 | 20.92 | 21.42 | 21.81 | 22.14 |
| 2.97 | 18.43 | 18.74 | 19.04 | 19.42 | 19.81 | 20.25 | 20.64 | 20.96 | 21.38 | 21.78 | 22.27 |
| 3.02 | 18.12 | 18.48 | 18.85 | 19.20 | 19.64 | 19.98 | 20.40 | 20.85 | 21.20 | 21.57 | 21.97 |
| 3.07 | 17.88 | 18.23 | 18.58 | 18.99 | 19.36 | 19.77 | 20.08 | 20.54 | 20.86 | 21.27 | 21.68 |
| 3.12 | 18.66 | 18.96 | 19.31 | 19.74 | 20.14 | 20.49 | 20.80 | 21.20 | 21.71 | 22.17 | 22.62 |
| 3.17 | 17.83 | 18.14 | 18.54 | 18.85 | 19.25 | 19.64 | 20.00 | 20.46 | 20.86 | 21.33 | 21.80 |
| 3.22 | 18.12 | 18.42 | 18.72 | 19.15 | 19.59 | 19.95 | 20.35 | 20.73 | 21.13 | 21.43 | 21.92 |
| 3.27 | 17.71 | 17.97 | 18.40 | 18.75 | 19.17 | 19.57 | 19.87 | 20.16 | 20.63 | 20.95 | 21.35 |
| 3.32 | 17.99 | 18.31 | 18.49 | 18.96 | 19.32 | 19.76 | 20.08 | 20.52 | 20.86 | 21.23 | 21.64 |
| 3.37 | 17.94 | 18.28 | 18.55 | 19.00 | 19.33 | 19.69 | 20.10 | 20.43 | 20.94 | 21.28 | 21.68 |
| 3.42 | 17.82 | 18.17 | 18.51 | 18.83 | 19.18 | 19.56 | 19.92 | 20.35 | 20.77 | 21.17 | 21.50 |
| 3.47 | 17.79 | 18.14 | 18.44 | 18.75 | 19.11 | 19.52 | 20.00 | 20.33 | 20.73 | 21.13 | 21.56 |
| 3.52 | 18.20 | 18.50 | 18.84 | 19.15 | 19.49 | 19.87 | 20.15 | 20.48 | 20.92 | 21.29 | 21.64 |
| 3.57 | 17.75 | 18.02 | 18.44 | 18.69 | 19.09 | 19.44 | 19.80 | 20.14 | 20.55 | 20.86 | 21.26 |
| 3.62 | 17.81 | 18.13 | 18.52 | 18.85 | 19.14 | 19.52 | 19.85 | 20.20 | 20.57 | 20.91 | 21.34 |
| 3.67 | 18.14 | 18.45 | 18.75 | 19.10 | 19.48 | 19.82 | 20.15 | 20.53 | 20.94 | 21.30 | 21.66 |
| 3.72 | 17.95 | 18.24 | 18.51 | 18.87 | 19.25 | 19.63 | 19.97 | 20.31 | 20.68 | 21.06 | 21.49 |
| 3.92 | 17.56 | 17.88 | 18.17 | 18.51 | 18.82 | 19.14 | 19.45 | 19.88 | 20.25 | 20.52 | 20.91 |
| 4.12 | 17.82 | 18.06 | 18.34 | 18.78 | 19.09 | 19.37 | 19.60 | 19.97 | 20.40 | 20.74 | 21.08 |
| 4.32 | 18.18 | 18.40 | 18.72 | 19.10 | 19.49 | 19.86 | 20.18 | 20.44 | 20.90 | 21.24 | 21.70 |
| 4.52 | 18.18 | 18.47 | 18.71 | 19.06 | 19.40 | 19.70 | 20.05 | 20.43 | 20.79 | 21.15 | 21.48 |
| 4.72 | 17.95 | 18.23 | 18.47 | 18.82 | 19.10 | 19.44 | 19.78 | 20.10 | 20.54 | 20.83 | 21.25 |
| 4.92 | 18.21 | 18.48 | 18.84 | 19.13 | 19.47 | 19.80 | 20.18 | 20.54 | 20.94 | 21.33 | 21.60 |
| 5.12 | 18.38 | 18.69 | 18.98 | 19.30 | 19.63 | 19.91 | 20.23 | 20.54 | 20.98 | 21.33 | 21.67 |
| 5.32 | 18.41 | 18.69 | 18.94 | 19.24 | 19.59 | 19.94 | 20.20 | 20.57 | 20.89 | 21.25 | 21.62 |
| 5.52 | 18.19 | 18.45 | 18.76 | 19.05 | 19.37 | 19.72 | 19.97 | 20.26 | 20.65 | 20.98 | 21.29 |
| 5.72 | 18.53 | 18.87 | 19.06 | 19.46 | 19.83 | 20.11 | 20.50 | 20.77 | 21.16 | 21.53 | 21.85 |
| 5.92 | 18.38 | 18.76 | 18.98 | 19.39 | 19.66 | 20.03 | 20.39 | 20.67 | 21.13 | 21.39 | 21.63 |
| 6.12 | 18.17 | 18.45 | 18.77 | 19.04 | 19.38 | 19.70 | 19.98 | 20.19 | 20.65 | 20.96 | 21.26 |
| 6.32 | 18.03 | 18.35 | 18.58 | 18.92 | 19.34 | 19.57 | 19.84 | 20.13 | 20.50 | 20.81 | 21.23 |
| 6.52 | 18.19 | 18.49 | 18.87 | 19.16 | 19.44 | 19.79 | 20.10 | 20.49 | 20.86 | 21.10 | 21.48 |
| 6.72 | 18.36 | 18.74 | 18.97 | 19.30 | 19.63 | 19.97 | 20.26 | 20.67 | 20.93 | 21.24 | 21.61 |
| 6.92 | 18.06 | 18.32 | 18.74 | 19.05 | 19.36 | 19.58 | 19.94 | 20.37 | 20.64 | 21.04 | 21.38 |
| 7.12 | 17.48 | 17.76 | 18.11 | 18.45 | 18.77 | 19.09 | 19.46 | 19.80 | 20.20 | 20.45 | 20.88 |
| 7.32 | 18.37 | 18.59 | 18.86 | 19.18 | 19.41 | 19.76 | 20.02 | 20.34 | 20.62 | 20.98 | 21.24 |
| 7.52 | 18.11 | 18.39 | 18.69 | 19.06 | 19.37 | 19.66 | 19.98 | 20.28 | 20.59 | 20.86 | 21.26 |
| 7.72 | 18.18 | 18.52 | 18.81 | 19.15 | 19.44 | 19.69 | 20.05 | 20.32 | 20.61 | 20.99 | 21.36 |
| 7.92 | 18.39 | 18.73 | 19.02 | 19.32 | 19.70 | 20.07 | 20.38 | 20.73 | 21.15 | 21.47 | 21.87 |
| 8.12 | 18.17 | 18.42 | 18.72 | 19.03 | 19.40 | 19.76 | 20.06 | 20.39 | 20.78 | 21.15 | 21.49 |
| 8.32 | 18.26 | 18.56 | 18.87 | 19.19 | 19.57 | 19.84 | 20.02 | 20.41 | 20.79 | 21.15 | 21.48 |
| 8.52 | 18.35 | 18.65 | 18.89 | 19.23 | 19.62 | 19.96 | 20.26 | 20.50 | 20.85 | 21.27 | 21.55 |



|       |       |       |       |       |       |       |       |       |       |       |       |
|-------|-------|-------|-------|-------|-------|-------|-------|-------|-------|-------|-------|
| 8.72  | 18.10 | 18.37 | 18.71 | 19.09 | 19.44 | 19.73 | 20.03 | 20.31 | 20.60 | 20.99 | 21.38 |
| 8.92  | 18.51 | 18.83 | 19.08 | 19.39 | 19.75 | 20.12 | 20.44 | 20.72 | 21.01 | 21.36 | 21.77 |
| 9.12  | 18.72 | 19.07 | 19.36 | 19.67 | 20.05 | 20.38 | 20.75 | 21.05 | 21.41 | 21.77 | 22.11 |
| 9.32  | 18.64 | 18.93 | 19.28 | 19.60 | 19.89 | 20.25 | 20.56 | 20.81 | 21.30 | 21.67 | 22.01 |
| 9.52  | 18.72 | 19.03 | 19.26 | 19.56 | 19.90 | 20.24 | 20.61 | 20.94 | 21.29 | 21.59 | 21.88 |
| 9.72  | 18.65 | 19.00 | 19.25 | 19.57 | 19.92 | 20.25 | 20.55 | 20.88 | 21.20 | 21.52 | 21.85 |
| 9.92  | 18.56 | 18.80 | 19.11 | 19.45 | 19.80 | 20.05 | 20.44 | 20.71 | 21.10 | 21.37 | 21.74 |
| 10.12 | 18.31 | 18.66 | 18.91 | 19.37 | 19.65 | 20.06 | 20.32 | 20.69 | 21.00 | 21.31 | 21.63 |
| 10.32 | 18.37 | 18.74 | 18.99 | 19.33 | 19.61 | 19.94 | 20.17 | 20.57 | 20.89 | 21.25 | 21.59 |
| 10.52 | 18.35 | 18.65 | 18.92 | 19.26 | 19.60 | 19.90 | 20.23 | 20.60 | 20.94 | 21.24 | 21.59 |
| 10.72 | 17.87 | 18.20 | 18.44 | 18.82 | 19.10 | 19.43 | 19.73 | 20.05 | 20.35 | 20.64 | 20.99 |
| 10.92 | 18.60 | 18.77 | 19.10 | 19.46 | 19.81 | 20.16 | 20.47 | 20.77 | 21.05 | 21.30 | 21.72 |
| 11.12 | 18.50 | 18.85 | 19.08 | 19.45 | 19.73 | 20.04 | 20.39 | 20.74 | 21.13 | 21.35 | 21.69 |
| 11.32 | 18.39 | 18.71 | 18.98 | 19.27 | 19.65 | 20.05 | 20.39 | 20.74 | 21.08 | 21.29 | 21.66 |
| 11.52 | 18.10 | 18.42 | 18.74 | 19.06 | 19.34 | 19.74 | 20.00 | 20.41 | 20.77 | 21.11 | 21.51 |
| 11.72 | 18.12 | 18.42 | 18.75 | 19.15 | 19.36 | 19.72 | 20.05 | 20.44 | 20.85 | 21.12 | 21.48 |
| 11.92 | 17.54 | 17.79 | 18.06 | 18.33 | 18.65 | 19.03 | 19.41 | 19.73 | 20.10 | 20.34 | 20.67 |
| 12.12 | 17.64 | 17.93 | 18.25 | 18.67 | 18.95 | 19.26 | 19.53 | 19.81 | 20.22 | 20.59 | 20.95 |
| 12.32 | 18.21 | 18.55 | 18.83 | 19.17 | 19.50 | 19.93 | 20.20 | 20.48 | 20.88 | 21.14 | 21.50 |
| 12.52 | 18.48 | 18.83 | 19.08 | 19.43 | 19.79 | 20.13 | 20.46 | 20.80 | 21.11 | 21.45 | 21.85 |
| 12.72 | 18.61 | 18.90 | 19.20 | 19.53 | 19.88 | 20.20 | 20.55 | 20.91 | 21.34 | 21.56 | 21.93 |
| 12.92 | 18.35 | 18.61 | 18.89 | 19.21 | 19.57 | 19.84 | 20.19 | 20.48 | 20.77 | 21.10 | 21.46 |
| 13.12 | 18.32 | 18.58 | 18.86 | 19.25 | 19.58 | 19.80 | 20.17 | 20.53 | 20.82 | 21.21 | 21.40 |
| 13.32 | 18.78 | 19.20 | 19.45 | 19.75 | 20.07 | 20.44 | 20.81 | 21.04 | 21.36 | 21.63 | 22.02 |
| 13.52 | 18.48 | 18.77 | 19.04 | 19.37 | 19.75 | 20.14 | 20.43 | 20.77 | 21.11 | 21.46 | 21.88 |
| 13.72 | 18.61 | 18.89 | 19.19 | 19.60 | 19.94 | 20.28 | 20.56 | 20.90 | 21.26 | 21.54 | 21.94 |
| 13.92 | 18.73 | 19.11 | 19.46 | 19.80 | 20.13 | 20.38 | 20.78 | 21.16 | 21.44 | 21.78 | 22.09 |
| 14    | 18.29 | 18.60 | 18.93 | 19.21 | 19.66 | 19.95 | 20.24 | 20.68 | 20.89 | 21.21 | 21.65 |
| 14.08 | 18.39 | 18.73 | 19.09 | 19.39 | 19.75 | 20.01 | 20.38 | 20.68 | 21.00 | 21.23 | 21.52 |
| 14.17 | 17.96 | 18.28 | 18.54 | 18.90 | 19.24 | 19.61 | 19.94 | 20.24 | 20.52 | 20.85 | 21.17 |
| 14.27 | 18.60 | 18.93 | 19.24 | 19.56 | 19.94 | 20.30 | 20.69 | 21.01 | 21.40 | 21.63 | 22.00 |
| 14.38 | 18.36 | 18.77 | 19.03 | 19.38 | 19.69 | 20.12 | 20.48 | 20.79 | 21.14 | 21.46 | 21.76 |
| 14.49 | 18.20 | 18.53 | 18.78 | 19.15 | 19.43 | 19.78 | 20.08 | 20.44 | 20.82 | 21.05 | 21.31 |
| 14.61 | 18.69 | 19.06 | 19.30 | 19.57 | 19.98 | 20.29 | 20.70 | 21.08 | 21.33 | 21.60 | 21.98 |
| 14.75 | 18.43 | 18.78 | 19.19 | 19.48 | 19.82 | 20.06 | 20.41 | 20.78 | 21.15 | 21.49 | 21.82 |
| 14.89 | 18.69 | 18.91 | 19.34 | 19.75 | 20.00 | 20.28 | 20.59 | 20.99 | 21.32 | 21.62 | 22.01 |
| 15.05 | 18.98 | 19.22 | 19.52 | 19.90 | 20.21 | 20.54 | 20.84 | 21.22 | 21.63 | 21.93 | 22.27 |
| 15.21 | 18.21 | 18.61 | 18.81 | 19.19 | 19.54 | 19.87 | 20.26 | 20.64 | 20.98 | 21.31 | 21.66 |
| 15.39 | 18.42 | 18.69 | 19.05 | 19.35 | 19.71 | 19.93 | 20.26 | 20.62 | 21.01 | 21.23 | 21.57 |
| 15.59 | 18.54 | 18.84 | 19.06 | 19.45 | 19.69 | 20.06 | 20.41 | 20.83 | 21.12 | 21.41 | 21.69 |
| 15.8  | 18.10 | 18.37 | 18.73 | 19.01 | 19.37 | 19.74 | 19.99 | 20.37 | 20.71 | 20.94 | 21.28 |
| 16.02 | 18.23 | 18.63 | 18.77 | 19.15 | 19.50 | 19.88 | 20.26 | 20.60 | 20.96 | 21.26 | 21.53 |
| 16.27 | 18.51 | 18.88 | 19.18 | 19.42 | 19.85 | 20.20 | 20.54 | 20.86 | 21.22 | 21.53 | 21.85 |
| 16.53 | 18.31 | 18.58 | 18.97 | 19.28 | 19.63 | 19.98 | 20.29 | 20.54 | 20.96 | 21.21 | 21.55 |
| 16.81 | 18.53 | 18.76 | 19.18 | 19.43 | 19.78 | 20.04 | 20.40 | 20.81 | 21.22 | 21.33 | 21.71 |
| 17.12 | 18.29 | 18.63 | 18.96 | 19.37 | 19.62 | 19.92 | 20.28 | 20.59 | 20.97 | 21.21 | 21.55 |
| 17.45 | 18.64 | 18.91 | 19.20 | 19.52 | 19.89 | 20.24 | 20.63 | 20.90 | 21.19 | 21.56 | 21.91 |
| 17.81 | 18.56 | 18.80 | 19.16 | 19.52 | 19.86 | 20.22 | 20.52 | 20.86 | 21.23 | 21.50 | 21.78 |
| 18.19 | 18.30 | 18.61 | 18.91 | 19.25 | 19.56 | 19.88 | 20.22 | 20.55 | 20.90 | 21.27 | 21.43 |
| 18.6  | 18.22 | 18.59 | 18.73 | 19.11 | 19.43 | 19.71 | 20.02 | 20.34 | 20.64 | 20.95 | 21.26 |

|        |       |       |       |       |       |       |       |       |       |       |       |
|--------|-------|-------|-------|-------|-------|-------|-------|-------|-------|-------|-------|
| 19.05  | 18.62 | 18.96 | 19.21 | 19.67 | 19.88 | 20.29 | 20.55 | 20.88 | 21.17 | 21.48 | 21.83 |
| 19.53  | 18.56 | 18.89 | 19.22 | 19.52 | 19.88 | 20.23 | 20.49 | 20.85 | 21.15 | 21.36 | 21.65 |
| 20.05  | 18.46 | 18.74 | 18.99 | 19.38 | 19.69 | 20.02 | 20.28 | 20.66 | 21.03 | 21.32 | 21.69 |
| 20.61  | 18.59 | 18.96 | 19.21 | 19.58 | 19.97 | 20.29 | 20.67 | 20.97 | 21.25 | 21.61 | 21.99 |
| 21.22  | 18.46 | 18.82 | 19.14 | 19.44 | 19.87 | 20.14 | 20.47 | 20.81 | 21.12 | 21.39 | 21.65 |
| 21.87  | 18.23 | 18.58 | 18.80 | 19.17 | 19.48 | 19.87 | 20.15 | 20.48 | 20.89 | 21.10 | 21.45 |
| 22.57  | 18.70 | 19.06 | 19.39 | 19.69 | 19.96 | 20.35 | 20.64 | 20.92 | 21.21 | 21.50 | 21.84 |
| 23.33  | 18.09 | 18.38 | 18.73 | 19.03 | 19.34 | 19.66 | 19.97 | 20.26 | 20.60 | 20.94 | 21.18 |
| 24.15  | 18.51 | 18.85 | 19.22 | 19.48 | 19.83 | 20.05 | 20.34 | 20.73 | 21.15 | 21.35 | 21.72 |
| 25.03  | 18.36 | 18.73 | 19.05 | 19.40 | 19.73 | 20.01 | 20.30 | 20.64 | 20.92 | 21.21 | 21.56 |
| 25.98  | 18.62 | 18.91 | 19.18 | 19.59 | 19.96 | 20.25 | 20.54 | 20.93 | 21.23 | 21.53 | 21.89 |
| 27.01  | 18.80 | 19.14 | 19.49 | 19.87 | 20.19 | 20.47 | 20.75 | 21.06 | 21.34 | 21.66 | 21.87 |
| 28.11  | 18.22 | 18.59 | 18.90 | 19.14 | 19.56 | 19.89 | 20.20 | 20.50 | 20.76 | 21.04 | 21.32 |
| 29.3   | 18.77 | 19.02 | 19.41 | 19.78 | 20.11 | 20.42 | 20.64 | 20.97 | 21.39 | 21.62 | 22.05 |
| 30.59  | 18.21 | 18.48 | 18.76 | 19.10 | 19.45 | 19.76 | 20.05 | 20.34 | 20.59 | 20.84 | 21.23 |
| 31.98  | 18.61 | 18.95 | 19.21 | 19.48 | 19.83 | 20.16 | 20.46 | 20.79 | 20.98 | 21.28 | 21.57 |
| 33.47  | 18.41 | 18.69 | 18.94 | 19.32 | 19.57 | 19.98 | 20.29 | 20.56 | 20.85 | 21.07 | 21.36 |
| 35.09  | 18.55 | 18.87 | 19.25 | 19.55 | 19.88 | 20.20 | 20.46 | 20.75 | 21.10 | 21.34 | 21.61 |
| 36.83  | 18.81 | 19.09 | 19.36 | 19.73 | 20.12 | 20.36 | 20.62 | 20.90 | 21.21 | 21.49 | 21.80 |
| 38.71  | 18.81 | 19.10 | 19.30 | 19.57 | 19.91 | 20.27 | 20.60 | 20.86 | 21.20 | 21.42 | 21.71 |
| 40.73  | 18.69 | 18.96 | 19.33 | 19.59 | 19.83 | 20.18 | 20.48 | 20.77 | 21.14 | 21.40 | 21.66 |
| 42.92  | 18.98 | 19.23 | 19.57 | 19.90 | 20.19 | 20.50 | 20.72 | 20.97 | 21.33 | 21.58 | 21.85 |
| 45.27  | 18.81 | 19.04 | 19.27 | 19.63 | 19.93 | 20.33 | 20.58 | 20.75 | 20.99 | 21.34 | 21.58 |
| 47.81  | 19.07 | 19.34 | 19.70 | 19.93 | 20.27 | 20.63 | 20.93 | 21.20 | 21.49 | 21.69 | 21.94 |
| 50.55  | 18.69 | 18.97 | 19.29 | 19.54 | 19.92 | 20.18 | 20.44 | 20.68 | 21.00 | 21.22 | 21.56 |
| 53.51  | 18.90 | 19.21 | 19.45 | 19.70 | 19.93 | 20.28 | 20.53 | 20.81 | 21.18 | 21.37 | 21.61 |
| 56.69  | 19.10 | 19.29 | 19.63 | 19.93 | 20.09 | 20.49 | 20.69 | 20.98 | 21.15 | 21.41 | 21.70 |
| 60.13  | 18.92 | 19.18 | 19.33 | 19.64 | 19.94 | 20.19 | 20.43 | 20.68 | 20.93 | 21.12 | 21.40 |
| 63.84  | 19.05 | 19.26 | 19.61 | 19.75 | 20.06 | 20.34 | 20.53 | 20.88 | 21.10 | 21.27 | 21.61 |
| 67.83  | 19.38 | 19.61 | 19.87 | 20.14 | 20.48 | 20.75 | 20.92 | 21.21 | 21.51 | 21.73 | 22.05 |
| 72.15  | 19.25 | 19.47 | 19.64 | 19.81 | 20.15 | 20.42 | 20.64 | 20.79 | 21.15 | 21.36 | 21.63 |
| 76.8   | 18.87 | 19.13 | 19.38 | 19.68 | 19.93 | 20.21 | 20.51 | 20.67 | 21.01 | 21.18 | 21.47 |
| 81.81  | 19.05 | 19.32 | 19.54 | 19.81 | 20.07 | 20.27 | 20.49 | 20.82 | 20.99 | 21.20 | 21.47 |
| 87.22  | 19.18 | 19.40 | 19.61 | 19.83 | 20.09 | 20.29 | 20.56 | 20.77 | 21.00 | 21.28 | 21.50 |
| 93.06  | 19.44 | 19.64 | 19.78 | 20.12 | 20.39 | 20.56 | 20.83 | 21.00 | 21.22 | 21.34 | 21.64 |
| 99.35  | 19.79 | 20.07 | 20.19 | 20.53 | 20.73 | 20.96 | 21.13 | 21.34 | 21.63 | 21.79 | 22.01 |
| 106.13 | 19.34 | 19.55 | 19.79 | 20.03 | 20.18 | 20.43 | 20.61 | 20.85 | 21.12 | 21.19 | 21.33 |
| 113.45 | 19.58 | 19.78 | 19.97 | 20.14 | 20.39 | 20.65 | 20.90 | 21.08 | 21.26 | 21.33 | 21.62 |
| 121.34 | 19.52 | 19.81 | 19.99 | 20.16 | 20.22 | 20.56 | 20.70 | 20.92 | 21.12 | 21.27 | 21.43 |
| 129.86 | 19.78 | 19.97 | 20.15 | 20.39 | 20.60 | 20.73 | 20.94 | 21.12 | 21.23 | 21.33 | 21.47 |
| 139.04 | 19.84 | 20.04 | 20.22 | 20.38 | 20.58 | 20.68 | 20.85 | 20.99 | 21.20 | 21.32 | 21.42 |
| 148.94 | 20.32 | 20.40 | 20.63 | 20.85 | 21.00 | 21.14 | 21.26 | 21.42 | 21.69 | 21.75 | 21.97 |
| 159.62 | 19.80 | 19.93 | 20.17 | 20.31 | 20.51 | 20.58 | 20.81 | 20.93 | 21.06 | 21.19 | 21.32 |
| 171.14 | 19.90 | 20.10 | 20.15 | 20.35 | 20.57 | 20.70 | 20.81 | 20.98 | 21.06 | 21.15 | 21.32 |
| 183.56 | 20.09 | 20.19 | 20.28 | 20.52 | 20.63 | 20.78 | 20.83 | 20.95 | 21.15 | 21.20 | 21.29 |
| 196.96 | 20.45 | 20.56 | 20.75 | 20.85 | 20.93 | 21.02 | 21.21 | 21.32 | 21.44 | 21.51 | 21.51 |
| 211.41 | 20.58 | 20.67 | 20.75 | 20.83 | 21.00 | 21.11 | 21.30 | 21.31 | 21.44 | 21.47 | 21.64 |
| 226.99 | 21.06 | 21.10 | 21.22 | 21.31 | 21.45 | 21.58 | 21.69 | 21.63 | 21.73 | 21.83 | 21.83 |
| 243.8  | 20.60 | 20.67 | 20.72 | 20.82 | 20.93 | 21.02 | 21.12 | 21.15 | 21.26 | 21.25 | 21.36 |
| 261.93 | 20.86 | 20.92 | 20.99 | 21.08 | 21.19 | 21.21 | 21.23 | 21.27 | 21.44 | 21.38 | 21.47 |

|         |       |       |       |       |       |       |       |       |       |       |       |
|---------|-------|-------|-------|-------|-------|-------|-------|-------|-------|-------|-------|
| 281.48  | 20.86 | 20.95 | 21.01 | 21.06 | 21.13 | 21.18 | 21.19 | 21.22 | 21.29 | 21.25 | 21.42 |
| 302.56  | 21.26 | 21.35 | 21.35 | 21.35 | 21.36 | 21.37 | 21.50 | 21.48 | 21.58 | 21.44 | 21.43 |
| 325.3   | 21.27 | 21.31 | 21.23 | 21.30 | 21.37 | 21.38 | 21.41 | 21.44 | 21.44 | 21.45 | 21.44 |
| 349.83  | 20.81 | 20.87 | 20.83 | 20.88 | 20.95 | 20.97 | 20.94 | 20.98 | 21.03 | 20.96 | 20.92 |
| 376.28  | 21.48 | 21.49 | 21.41 | 21.40 | 21.46 | 21.42 | 21.40 | 21.34 | 21.38 | 21.26 | 21.19 |
| 404.81  | 21.35 | 21.37 | 21.36 | 21.40 | 21.27 | 21.30 | 21.28 | 21.21 | 21.22 | 21.13 | 21.00 |
| 435.58  | 21.73 | 21.67 | 21.57 | 21.54 | 21.51 | 21.54 | 21.43 | 21.42 | 21.37 | 21.24 | 21.20 |
| 468.76  | 21.83 | 21.80 | 21.67 | 21.60 | 21.52 | 21.51 | 21.44 | 21.36 | 21.33 | 21.19 | 21.15 |
| 504.55  | 21.87 | 21.81 | 21.72 | 21.63 | 21.56 | 21.58 | 21.48 | 21.40 | 21.33 | 21.19 | 21.09 |
| 543.15  | 21.76 | 21.72 | 21.53 | 21.46 | 21.34 | 21.30 | 21.24 | 21.13 | 21.05 | 20.86 | 20.77 |
| 584.78  | 21.90 | 21.85 | 21.80 | 21.75 | 21.73 | 21.57 | 21.42 | 21.33 | 21.17 | 21.06 | 20.92 |
| 629.68  | 22.09 | 22.03 | 21.91 | 21.82 | 21.66 | 21.56 | 21.35 | 21.25 | 21.15 | 20.98 | 20.84 |
| 678.1   | 21.70 | 21.60 | 21.45 | 21.42 | 21.30 | 21.17 | 21.00 | 20.94 | 20.81 | 20.67 | 20.47 |
| 730.33  | 22.22 | 22.08 | 21.92 | 21.85 | 21.72 | 21.60 | 21.40 | 21.20 | 21.06 | 20.90 | 20.70 |
| 786.65  | 22.30 | 22.17 | 21.99 | 21.93 | 21.74 | 21.61 | 21.46 | 21.28 | 21.23 | 21.06 | 20.89 |
| 847.4   | 22.39 | 22.12 | 22.03 | 21.86 | 21.67 | 21.50 | 21.29 | 21.15 | 21.02 | 20.86 | 20.64 |
| 912.92  | 22.09 | 21.93 | 21.68 | 21.64 | 21.51 | 21.38 | 21.22 | 21.01 | 20.72 | 20.52 | 20.43 |
| 983.58  | 21.80 | 21.71 | 21.47 | 21.46 | 21.29 | 21.03 | 20.90 | 20.79 | 20.60 | 20.32 | 20.12 |
| 1059.78 | 21.94 | 21.74 | 21.59 | 21.41 | 21.28 | 21.10 | 20.91 | 20.73 | 20.57 | 20.34 | 20.14 |
| 1141.98 | 21.69 | 21.52 | 21.27 | 21.10 | 21.00 | 20.82 | 20.63 | 20.44 | 20.34 | 20.07 | 19.82 |
| 1230.62 | 21.83 | 21.58 | 21.42 | 21.21 | 21.04 | 20.91 | 20.68 | 20.52 | 20.28 | 20.10 | 19.92 |
| 1326.23 | 22.24 | 22.04 | 21.85 | 21.67 | 21.50 | 21.31 | 21.11 | 20.87 | 20.69 | 20.49 | 20.20 |
| 1429.34 | 22.21 | 22.06 | 21.87 | 21.64 | 21.44 | 21.26 | 21.11 | 20.87 | 20.69 | 20.42 | 20.22 |
| 1540.54 | 22.10 | 21.90 | 21.69 | 21.57 | 21.40 | 21.21 | 20.95 | 20.75 | 20.50 | 20.34 | 20.14 |
| 1660.48 | 22.22 | 22.00 | 21.84 | 21.69 | 21.46 | 21.27 | 20.94 | 20.72 | 20.55 | 20.29 | 20.13 |
| 1789.83 | 22.41 | 22.20 | 21.99 | 21.76 | 21.65 | 21.39 | 21.17 | 20.96 | 20.78 | 20.54 | 20.31 |
| 1929.34 | 22.30 | 22.05 | 21.90 | 21.71 | 21.61 | 21.34 | 21.07 | 20.80 | 20.51 | 20.30 | 20.05 |
| 2079.8  | 22.13 | 21.95 | 21.68 | 21.56 | 21.37 | 21.18 | 21.02 | 20.77 | 20.53 | 20.32 | 20.13 |
| 2242.08 | 22.39 | 22.15 | 21.92 | 21.66 | 21.53 | 21.33 | 21.16 | 20.88 | 20.73 | 20.44 | 20.20 |
| 2417.1  | 21.88 | 21.65 | 21.49 | 21.34 | 21.25 | 20.92 | 20.70 | 20.53 | 20.31 | 20.04 | 19.88 |
| 2605.85 | 22.14 | 21.90 | 21.66 | 21.51 | 21.31 | 21.10 | 20.83 | 20.62 | 20.38 | 20.21 | 19.97 |
| 2809.43 | 21.82 | 21.64 | 21.42 | 21.26 | 21.13 | 20.91 | 20.70 | 20.35 | 20.18 | 19.95 | 19.75 |
| 3028.99 | 21.20 | 20.98 | 20.82 | 20.60 | 20.49 | 20.26 | 19.96 | 19.81 | 19.61 | 19.34 | 19.17 |
| 3265.79 | 21.27 | 21.10 | 20.85 | 20.68 | 20.49 | 20.33 | 20.08 | 19.84 | 19.66 | 19.38 | 19.24 |
| 3521.18 | 21.37 | 21.19 | 21.01 | 20.81 | 20.53 | 20.36 | 20.15 | 20.00 | 19.84 | 19.48 | 19.29 |
| 3796.62 | 21.59 | 21.42 | 21.11 | 20.95 | 20.80 | 20.51 | 20.36 | 20.13 | 19.87 | 19.69 | 19.52 |

| Wavelength (nm) \ Time (ps) | 661.57 | 662.98 | 664.39 | 665.80 | 667.21 | 668.62 | 670.02 |
|-----------------------------|--------|--------|--------|--------|--------|--------|--------|
| -3.28                       | -0.08  | -0.08  | -0.11  | -0.11  | -0.14  | -0.13  | -0.10  |
| -2.78                       | 0.00   | -0.02  | 0.02   | 0.10   | 0.12   | 0.09   | 0.12   |
| -2.28                       | -0.11  | -0.08  | 0.00   | -0.01  | -0.02  | 0.02   | -0.05  |
| -1.78                       | 0.02   | 0.00   | -0.03  | -0.13  | -0.07  | -0.04  | -0.03  |
| -1.28                       | 0.05   | 0.01   | 0.02   | 0.00   | 0.01   | -0.05  | -0.02  |
| -0.78                       | 0.00   | -0.01  | -0.04  | -0.05  | -0.12  | -0.07  | -0.08  |
| -0.28                       | 0.23   | 0.26   | 0.22   | 0.22   | 0.20   | 0.11   | 0.19   |
| 0.22                        | -0.10  | -0.08  | -0.07  | -0.03  | 0.02   | 0.07   | -0.03  |
| 0.32                        | -0.08  | -0.09  | -0.14  | -0.23  | -0.18  | -0.09  | -0.03  |

|      |       |       |       |       |       |       |       |
|------|-------|-------|-------|-------|-------|-------|-------|
| 0.42 | -0.04 | 0.00  | 0.04  | 0.00  | 0.01  | -0.05 | -0.03 |
| 0.52 | 0.20  | 0.14  | 0.13  | 0.14  | 0.08  | 0.10  | 0.21  |
| 0.62 | -0.20 | -0.22 | -0.20 | -0.16 | -0.14 | -0.02 | -0.02 |
| 0.72 | 0.00  | -0.03 | -0.02 | 0.02  | 0.08  | 0.07  | 0.15  |
| 0.77 | -0.05 | -0.10 | -0.09 | 0.00  | 0.02  | 0.17  | 0.23  |
| 0.82 | 0.05  | -0.02 | 0.00  | -0.03 | 0.00  | 0.07  | 0.18  |
| 0.87 | 0.10  | 0.03  | 0.09  | 0.07  | 0.16  | 0.14  | 0.15  |
| 0.92 | 0.04  | 0.08  | 0.09  | 0.12  | 0.18  | 0.11  | 0.17  |
| 0.97 | -0.12 | -0.10 | -0.11 | -0.14 | -0.04 | 0.04  | 0.07  |
| 1.02 | -0.21 | -0.19 | -0.26 | -0.15 | -0.07 | -0.17 | -0.10 |
| 1.07 | 0.07  | 0.09  | 0.11  | 0.12  | 0.10  | 0.12  | 0.11  |
| 1.12 | -0.02 | 0.03  | 0.05  | 0.13  | 0.08  | 0.10  | 0.14  |
| 1.17 | 0.02  | -0.01 | 0.01  | 0.05  | 0.02  | 0.03  | 0.07  |
| 1.22 | -0.11 | -0.20 | -0.18 | -0.09 | -0.06 | -0.11 | -0.11 |
| 1.27 | -0.05 | -0.09 | -0.03 | 0.07  | 0.07  | 0.10  | 0.11  |
| 1.32 | 0.07  | 0.04  | 0.09  | 0.02  | 0.08  | 0.04  | 0.12  |
| 1.37 | 0.02  | 0.00  | -0.04 | -0.01 | 0.03  | -0.02 | 0.01  |
| 1.42 | -0.07 | -0.15 | -0.06 | -0.08 | 0.03  | 0.03  | 0.03  |
| 1.47 | -0.20 | -0.22 | -0.23 | -0.21 | -0.17 | -0.09 | -0.03 |
| 1.52 | -0.19 | -0.19 | -0.22 | -0.21 | -0.08 | -0.08 | 0.05  |
| 1.57 | 0.09  | 0.08  | 0.07  | 0.11  | 0.16  | 0.13  | 0.17  |
| 1.62 | 2.35  | 2.28  | 2.22  | 2.08  | 1.97  | 1.94  | 2.03  |
| 1.67 | 12.74 | 12.40 | 12.08 | 11.79 | 11.51 | 11.40 | 11.30 |
| 1.72 | 22.33 | 22.08 | 21.97 | 21.63 | 21.45 | 21.38 | 21.49 |
| 1.77 | 25.09 | 25.02 | 25.01 | 25.05 | 25.11 | 25.27 | 25.51 |
| 1.82 | 26.03 | 26.23 | 26.31 | 26.46 | 26.55 | 26.99 | 27.48 |
| 1.87 | 25.26 | 25.57 | 25.82 | 26.11 | 26.37 | 26.94 | 27.40 |
| 1.92 | 25.16 | 25.59 | 26.01 | 26.37 | 26.77 | 27.37 | 28.00 |
| 1.97 | 24.78 | 25.18 | 25.59 | 26.04 | 26.50 | 27.20 | 28.09 |
| 2.02 | 24.39 | 24.87 | 25.34 | 25.91 | 26.49 | 27.17 | 27.95 |
| 2.07 | 24.43 | 24.97 | 25.44 | 25.84 | 26.36 | 27.11 | 27.97 |
| 2.12 | 23.49 | 23.86 | 24.37 | 24.75 | 25.21 | 25.90 | 26.60 |
| 2.17 | 23.12 | 23.64 | 23.95 | 24.42 | 24.81 | 25.41 | 26.08 |
| 2.22 | 22.92 | 23.34 | 23.80 | 24.26 | 24.68 | 25.31 | 25.90 |
| 2.27 | 23.48 | 23.98 | 24.47 | 24.82 | 25.33 | 26.05 | 26.85 |
| 2.32 | 23.64 | 24.09 | 24.58 | 25.06 | 25.61 | 26.26 | 27.08 |
| 2.37 | 23.28 | 23.79 | 24.24 | 24.70 | 25.21 | 25.73 | 26.46 |
| 2.42 | 23.01 | 23.34 | 23.81 | 24.19 | 24.59 | 25.26 | 25.82 |
| 2.47 | 22.91 | 23.29 | 23.73 | 24.10 | 24.53 | 25.07 | 25.76 |
| 2.52 | 22.70 | 23.19 | 23.57 | 23.96 | 24.48 | 25.12 | 25.70 |
| 2.57 | 22.92 | 23.41 | 23.86 | 24.33 | 24.84 | 25.57 | 26.22 |
| 2.62 | 22.96 | 23.45 | 23.88 | 24.29 | 24.83 | 25.45 | 26.17 |
| 2.67 | 22.77 | 23.17 | 23.59 | 23.88 | 24.39 | 25.05 | 25.73 |
| 2.72 | 22.37 | 22.75 | 23.16 | 23.63 | 23.91 | 24.55 | 25.17 |
| 2.77 | 22.66 | 23.02 | 23.42 | 23.78 | 24.17 | 24.78 | 25.42 |
| 2.82 | 22.68 | 23.06 | 23.47 | 23.91 | 24.28 | 24.88 | 25.59 |
| 2.87 | 22.55 | 22.98 | 23.43 | 23.85 | 24.23 | 24.89 | 25.60 |
| 2.92 | 22.63 | 23.10 | 23.55 | 23.90 | 24.36 | 24.95 | 25.71 |
| 2.97 | 22.63 | 23.04 | 23.41 | 23.83 | 24.21 | 24.83 | 25.39 |
| 3.02 | 22.47 | 22.74 | 23.15 | 23.61 | 24.06 | 24.64 | 25.22 |

|       |       |       |       |       |       |       |       |
|-------|-------|-------|-------|-------|-------|-------|-------|
| 3.07  | 22.07 | 22.50 | 22.87 | 23.24 | 23.69 | 24.32 | 24.95 |
| 3.12  | 23.10 | 23.53 | 23.98 | 24.38 | 24.90 | 25.55 | 26.19 |
| 3.17  | 22.22 | 22.68 | 23.13 | 23.52 | 23.97 | 24.57 | 25.25 |
| 3.22  | 22.36 | 22.72 | 23.10 | 23.40 | 23.77 | 24.42 | 25.11 |
| 3.27  | 21.79 | 22.17 | 22.49 | 22.81 | 23.19 | 23.73 | 24.33 |
| 3.32  | 22.03 | 22.44 | 22.73 | 23.18 | 23.50 | 24.10 | 24.73 |
| 3.37  | 22.16 | 22.65 | 23.03 | 23.44 | 23.82 | 24.38 | 24.98 |
| 3.42  | 21.97 | 22.30 | 22.85 | 23.19 | 23.57 | 24.27 | 24.89 |
| 3.47  | 21.97 | 22.40 | 22.83 | 23.21 | 23.54 | 24.23 | 24.86 |
| 3.52  | 22.00 | 22.43 | 22.65 | 23.06 | 23.47 | 24.09 | 24.71 |
| 3.57  | 21.68 | 21.97 | 22.39 | 22.67 | 23.05 | 23.46 | 24.07 |
| 3.62  | 21.70 | 22.02 | 22.45 | 22.80 | 23.24 | 23.80 | 24.37 |
| 3.67  | 22.12 | 22.54 | 22.92 | 23.35 | 23.65 | 24.27 | 24.97 |
| 3.72  | 21.95 | 22.34 | 22.69 | 23.14 | 23.56 | 24.22 | 24.95 |
| 3.92  | 21.25 | 21.66 | 22.04 | 22.36 | 22.69 | 23.16 | 23.81 |
| 4.12  | 21.45 | 21.76 | 22.04 | 22.39 | 22.75 | 23.23 | 23.80 |
| 4.32  | 22.07 | 22.37 | 22.69 | 23.01 | 23.47 | 23.94 | 24.43 |
| 4.52  | 21.87 | 22.21 | 22.62 | 22.95 | 23.40 | 23.84 | 24.38 |
| 4.72  | 21.55 | 21.97 | 22.40 | 22.68 | 23.12 | 23.66 | 24.22 |
| 4.92  | 22.06 | 22.46 | 22.72 | 23.13 | 23.45 | 23.98 | 24.60 |
| 5.12  | 22.04 | 22.33 | 22.70 | 23.03 | 23.37 | 23.93 | 24.48 |
| 5.32  | 21.96 | 22.32 | 22.60 | 22.92 | 23.21 | 23.76 | 24.33 |
| 5.52  | 21.64 | 21.96 | 22.27 | 22.62 | 22.97 | 23.42 | 24.00 |
| 5.72  | 22.19 | 22.52 | 22.84 | 23.19 | 23.50 | 24.00 | 24.55 |
| 5.92  | 22.06 | 22.39 | 22.71 | 23.02 | 23.31 | 23.88 | 24.40 |
| 6.12  | 21.56 | 21.85 | 22.19 | 22.55 | 22.93 | 23.39 | 23.95 |
| 6.32  | 21.46 | 21.76 | 21.98 | 22.29 | 22.57 | 23.10 | 23.58 |
| 6.52  | 21.74 | 22.05 | 22.37 | 22.68 | 23.02 | 23.40 | 23.81 |
| 6.72  | 21.99 | 22.31 | 22.57 | 22.89 | 23.11 | 23.66 | 24.08 |
| 6.92  | 21.68 | 21.99 | 22.40 | 22.75 | 23.03 | 23.61 | 24.10 |
| 7.12  | 21.21 | 21.51 | 21.87 | 22.21 | 22.54 | 23.03 | 23.52 |
| 7.32  | 21.62 | 21.93 | 22.18 | 22.48 | 22.79 | 23.22 | 23.80 |
| 7.52  | 21.49 | 21.73 | 22.01 | 22.31 | 22.63 | 23.01 | 23.55 |
| 7.72  | 21.73 | 22.00 | 22.25 | 22.56 | 22.92 | 23.37 | 23.91 |
| 7.92  | 22.31 | 22.59 | 22.89 | 23.14 | 23.57 | 24.09 | 24.62 |
| 8.12  | 21.76 | 22.24 | 22.39 | 22.69 | 23.01 | 23.51 | 24.05 |
| 8.32  | 21.84 | 22.17 | 22.47 | 22.84 | 23.17 | 23.60 | 24.22 |
| 8.52  | 21.92 | 22.20 | 22.51 | 22.82 | 23.02 | 23.47 | 23.87 |
| 8.72  | 21.68 | 21.95 | 22.19 | 22.41 | 22.71 | 23.16 | 23.62 |
| 8.92  | 22.03 | 22.32 | 22.60 | 22.91 | 23.10 | 23.67 | 24.20 |
| 9.12  | 22.46 | 22.82 | 23.11 | 23.45 | 23.70 | 24.25 | 24.82 |
| 9.32  | 22.35 | 22.64 | 23.04 | 23.37 | 23.70 | 24.16 | 24.67 |
| 9.52  | 22.28 | 22.56 | 22.88 | 23.21 | 23.48 | 23.93 | 24.46 |
| 9.72  | 22.14 | 22.42 | 22.62 | 22.95 | 23.28 | 23.65 | 24.16 |
| 9.92  | 22.12 | 22.36 | 22.62 | 22.84 | 23.11 | 23.61 | 24.10 |
| 10.12 | 22.03 | 22.33 | 22.66 | 22.94 | 23.23 | 23.70 | 24.16 |
| 10.32 | 21.97 | 22.23 | 22.59 | 22.87 | 23.21 | 23.78 | 24.25 |
| 10.52 | 21.89 | 22.22 | 22.46 | 22.86 | 23.17 | 23.63 | 24.11 |
| 10.72 | 21.33 | 21.63 | 21.92 | 22.19 | 22.46 | 22.97 | 23.31 |
| 10.92 | 22.05 | 22.28 | 22.47 | 22.76 | 23.07 | 23.58 | 24.08 |

|       |       |       |       |       |       |       |       |
|-------|-------|-------|-------|-------|-------|-------|-------|
| 11.12 | 22.01 | 22.34 | 22.57 | 22.80 | 23.14 | 23.57 | 23.97 |
| 11.32 | 22.12 | 22.45 | 22.72 | 23.05 | 23.40 | 23.88 | 24.47 |
| 11.52 | 21.72 | 22.11 | 22.39 | 22.75 | 23.00 | 23.43 | 24.02 |
| 11.72 | 21.76 | 22.01 | 22.34 | 22.58 | 22.85 | 23.27 | 23.64 |
| 11.92 | 20.99 | 21.34 | 21.65 | 21.93 | 22.11 | 22.61 | 23.11 |
| 12.12 | 21.25 | 21.47 | 21.65 | 21.97 | 22.24 | 22.69 | 23.06 |
| 12.32 | 21.82 | 22.14 | 22.43 | 22.68 | 22.91 | 23.45 | 23.96 |
| 12.52 | 22.14 | 22.54 | 22.84 | 23.12 | 23.42 | 23.95 | 24.41 |
| 12.72 | 22.27 | 22.64 | 22.91 | 23.26 | 23.52 | 24.03 | 24.53 |
| 12.92 | 21.82 | 22.00 | 22.32 | 22.62 | 22.88 | 23.29 | 23.79 |
| 13.12 | 21.84 | 22.07 | 22.42 | 22.63 | 22.90 | 23.28 | 23.67 |
| 13.32 | 22.36 | 22.64 | 22.85 | 23.04 | 23.34 | 23.83 | 24.38 |
| 13.52 | 22.25 | 22.56 | 22.82 | 23.15 | 23.40 | 23.90 | 24.42 |
| 13.72 | 22.23 | 22.63 | 22.84 | 23.10 | 23.42 | 23.86 | 24.41 |
| 13.92 | 22.57 | 22.81 | 23.10 | 23.36 | 23.64 | 24.09 | 24.55 |
| 14    | 21.88 | 22.13 | 22.27 | 22.63 | 22.85 | 23.24 | 23.72 |
| 14.08 | 21.86 | 22.14 | 22.42 | 22.60 | 22.91 | 23.32 | 23.84 |
| 14.17 | 21.42 | 21.77 | 21.98 | 22.27 | 22.60 | 23.03 | 23.47 |
| 14.27 | 22.37 | 22.61 | 22.91 | 23.19 | 23.53 | 23.97 | 24.43 |
| 14.38 | 22.14 | 22.43 | 22.76 | 22.95 | 23.16 | 23.63 | 24.14 |
| 14.49 | 21.68 | 21.98 | 22.24 | 22.46 | 22.72 | 22.98 | 23.55 |
| 14.61 | 22.31 | 22.55 | 22.78 | 23.04 | 23.27 | 23.68 | 24.16 |
| 14.75 | 22.06 | 22.20 | 22.57 | 22.81 | 23.15 | 23.59 | 24.00 |
| 14.89 | 22.32 | 22.59 | 22.87 | 23.17 | 23.43 | 24.00 | 24.46 |
| 15.05 | 22.58 | 22.95 | 23.27 | 23.64 | 23.92 | 24.36 | 24.90 |
| 15.21 | 22.04 | 22.35 | 22.72 | 22.86 | 23.21 | 23.68 | 24.22 |
| 15.39 | 21.85 | 22.14 | 22.38 | 22.59 | 22.87 | 23.21 | 23.72 |
| 15.59 | 21.97 | 22.24 | 22.49 | 22.79 | 23.05 | 23.48 | 23.96 |
| 15.8  | 21.62 | 21.82 | 22.16 | 22.40 | 22.66 | 23.03 | 23.48 |
| 16.02 | 21.89 | 22.19 | 22.49 | 22.74 | 23.02 | 23.46 | 23.95 |
| 16.27 | 22.20 | 22.58 | 22.85 | 23.10 | 23.36 | 23.85 | 24.39 |
| 16.53 | 21.86 | 22.17 | 22.42 | 22.65 | 22.86 | 23.30 | 23.81 |
| 16.81 | 22.00 | 22.28 | 22.52 | 22.75 | 22.99 | 23.37 | 23.70 |
| 17.12 | 21.84 | 22.17 | 22.49 | 22.70 | 22.86 | 23.31 | 23.77 |
| 17.45 | 22.33 | 22.61 | 22.92 | 23.25 | 23.49 | 23.93 | 24.42 |
| 17.81 | 22.23 | 22.52 | 22.75 | 23.04 | 23.35 | 23.79 | 24.28 |
| 18.19 | 21.79 | 22.10 | 22.42 | 22.70 | 22.92 | 23.43 | 23.86 |
| 18.6  | 21.56 | 21.83 | 22.08 | 22.27 | 22.60 | 22.93 | 23.47 |
| 19.05 | 22.14 | 22.35 | 22.61 | 22.80 | 23.04 | 23.39 | 23.85 |
| 19.53 | 21.97 | 22.27 | 22.55 | 22.83 | 23.00 | 23.37 | 23.92 |
| 20.05 | 21.97 | 22.31 | 22.56 | 22.86 | 23.16 | 23.60 | 24.11 |
| 20.61 | 22.28 | 22.55 | 22.79 | 22.97 | 23.22 | 23.69 | 24.16 |
| 21.22 | 21.99 | 22.23 | 22.44 | 22.73 | 22.94 | 23.36 | 23.76 |
| 21.87 | 21.80 | 22.06 | 22.31 | 22.55 | 22.89 | 23.29 | 23.71 |
| 22.57 | 22.14 | 22.36 | 22.65 | 22.86 | 23.07 | 23.43 | 23.83 |
| 23.33 | 21.60 | 21.85 | 21.92 | 22.30 | 22.54 | 23.03 | 23.49 |
| 24.15 | 21.93 | 22.20 | 22.50 | 22.82 | 23.14 | 23.57 | 24.03 |
| 25.03 | 21.90 | 22.11 | 22.39 | 22.52 | 22.82 | 23.18 | 23.70 |
| 25.98 | 22.19 | 22.42 | 22.62 | 22.85 | 23.02 | 23.44 | 23.75 |
| 27.01 | 22.18 | 22.36 | 22.61 | 22.83 | 23.04 | 23.51 | 23.91 |

|        |       |       |       |       |       |       |       |
|--------|-------|-------|-------|-------|-------|-------|-------|
| 28.11  | 21.67 | 21.91 | 22.14 | 22.29 | 22.49 | 22.94 | 23.43 |
| 29.3   | 22.26 | 22.52 | 22.80 | 22.99 | 23.26 | 23.74 | 24.19 |
| 30.59  | 21.45 | 21.67 | 21.98 | 22.24 | 22.45 | 22.83 | 23.23 |
| 31.98  | 21.96 | 22.18 | 22.43 | 22.66 | 22.77 | 23.14 | 23.56 |
| 33.47  | 21.57 | 21.96 | 22.10 | 22.30 | 22.41 | 22.86 | 23.26 |
| 35.09  | 21.93 | 22.09 | 22.33 | 22.54 | 22.72 | 23.11 | 23.41 |
| 36.83  | 22.08 | 22.28 | 22.57 | 22.66 | 22.99 | 23.35 | 23.81 |
| 38.71  | 22.00 | 22.28 | 22.55 | 22.78 | 23.01 | 23.39 | 23.86 |
| 40.73  | 21.97 | 22.16 | 22.46 | 22.66 | 22.87 | 23.27 | 23.71 |
| 42.92  | 22.12 | 22.36 | 22.59 | 22.84 | 22.96 | 23.32 | 23.74 |
| 45.27  | 21.90 | 22.05 | 22.18 | 22.39 | 22.54 | 22.89 | 23.25 |
| 47.81  | 22.31 | 22.44 | 22.56 | 22.82 | 22.92 | 23.38 | 23.64 |
| 50.55  | 21.84 | 22.02 | 22.22 | 22.40 | 22.70 | 23.10 | 23.54 |
| 53.51  | 21.91 | 22.15 | 22.26 | 22.51 | 22.73 | 23.16 | 23.55 |
| 56.69  | 21.92 | 22.11 | 22.25 | 22.45 | 22.61 | 22.99 | 23.36 |
| 60.13  | 21.60 | 21.83 | 22.01 | 22.17 | 22.33 | 22.62 | 22.99 |
| 63.84  | 21.76 | 22.01 | 22.19 | 22.34 | 22.57 | 22.73 | 23.13 |
| 67.83  | 22.26 | 22.50 | 22.64 | 22.80 | 22.87 | 23.22 | 23.59 |
| 72.15  | 21.83 | 22.05 | 22.30 | 22.47 | 22.70 | 23.05 | 23.46 |
| 76.8   | 21.70 | 21.85 | 21.97 | 22.18 | 22.36 | 22.65 | 23.02 |
| 81.81  | 21.56 | 21.78 | 21.94 | 22.10 | 22.25 | 22.56 | 22.91 |
| 87.22  | 21.65 | 21.85 | 21.95 | 22.06 | 22.27 | 22.60 | 22.88 |
| 93.06  | 21.82 | 21.94 | 22.03 | 22.07 | 22.18 | 22.51 | 22.89 |
| 99.35  | 22.24 | 22.46 | 22.59 | 22.71 | 22.81 | 23.05 | 23.38 |
| 106.13 | 21.52 | 21.66 | 21.79 | 22.03 | 22.17 | 22.61 | 22.88 |
| 113.45 | 21.78 | 21.95 | 22.10 | 22.17 | 22.28 | 22.58 | 22.98 |
| 121.34 | 21.50 | 21.63 | 21.69 | 21.74 | 21.90 | 22.18 | 22.44 |
| 129.86 | 21.64 | 21.83 | 21.89 | 21.99 | 21.99 | 22.15 | 22.57 |
| 139.04 | 21.53 | 21.73 | 21.79 | 21.89 | 21.96 | 22.21 | 22.46 |
| 148.94 | 22.06 | 22.17 | 22.25 | 22.32 | 22.46 | 22.77 | 23.08 |
| 159.62 | 21.45 | 21.57 | 21.63 | 21.70 | 21.81 | 22.09 | 22.33 |
| 171.14 | 21.37 | 21.46 | 21.50 | 21.54 | 21.61 | 21.85 | 22.07 |
| 183.56 | 21.35 | 21.42 | 21.53 | 21.60 | 21.67 | 21.81 | 22.10 |
| 196.96 | 21.61 | 21.65 | 21.68 | 21.66 | 21.73 | 21.88 | 22.13 |
| 211.41 | 21.69 | 21.71 | 21.77 | 21.75 | 21.77 | 21.90 | 22.28 |
| 226.99 | 21.98 | 22.06 | 21.99 | 22.05 | 22.04 | 22.33 | 22.64 |
| 243.8  | 21.43 | 21.42 | 21.47 | 21.50 | 21.45 | 21.62 | 21.91 |
| 261.93 | 21.48 | 21.40 | 21.40 | 21.33 | 21.40 | 21.64 | 21.76 |
| 281.48 | 21.37 | 21.31 | 21.25 | 21.23 | 21.18 | 21.29 | 21.45 |
| 302.56 | 21.40 | 21.36 | 21.32 | 21.27 | 21.28 | 21.33 | 21.58 |
| 325.3  | 21.50 | 21.45 | 21.32 | 21.28 | 21.23 | 21.28 | 21.50 |
| 349.83 | 20.95 | 20.92 | 20.84 | 20.71 | 20.67 | 20.73 | 20.93 |
| 376.28 | 21.23 | 21.10 | 20.96 | 20.88 | 20.75 | 20.92 | 21.08 |
| 404.81 | 20.95 | 20.88 | 20.80 | 20.60 | 20.57 | 20.69 | 20.78 |
| 435.58 | 21.09 | 21.01 | 20.88 | 20.78 | 20.71 | 20.68 | 20.76 |
| 468.76 | 21.05 | 20.86 | 20.79 | 20.61 | 20.62 | 20.71 | 20.78 |
| 504.55 | 20.97 | 20.86 | 20.67 | 20.56 | 20.45 | 20.53 | 20.52 |
| 543.15 | 20.74 | 20.65 | 20.54 | 20.45 | 20.30 | 20.30 | 20.49 |
| 584.78 | 20.72 | 20.56 | 20.38 | 20.32 | 20.10 | 20.15 | 20.24 |
| 629.68 | 20.78 | 20.62 | 20.41 | 20.24 | 20.05 | 20.18 | 20.35 |

|         |       |       |       |       |       |       |       |
|---------|-------|-------|-------|-------|-------|-------|-------|
| 678.1   | 20.35 | 20.14 | 19.96 | 19.73 | 19.66 | 19.68 | 19.75 |
| 730.33  | 20.61 | 20.37 | 20.22 | 20.01 | 19.88 | 19.85 | 19.99 |
| 786.65  | 20.67 | 20.49 | 20.27 | 20.05 | 19.89 | 19.94 | 19.97 |
| 847.4   | 20.43 | 20.19 | 20.00 | 19.82 | 19.74 | 19.68 | 19.84 |
| 912.92  | 20.27 | 20.07 | 19.84 | 19.54 | 19.38 | 19.34 | 19.41 |
| 983.58  | 19.92 | 19.59 | 19.41 | 19.17 | 18.94 | 18.85 | 18.91 |
| 1059.78 | 20.04 | 19.73 | 19.49 | 19.23 | 19.07 | 19.03 | 19.20 |
| 1141.98 | 19.65 | 19.41 | 19.23 | 18.99 | 18.86 | 18.91 | 18.99 |
| 1230.62 | 19.76 | 19.53 | 19.27 | 19.04 | 18.88 | 18.88 | 18.84 |
| 1326.23 | 19.98 | 19.75 | 19.45 | 19.24 | 19.09 | 18.99 | 19.04 |
| 1429.34 | 20.02 | 19.78 | 19.52 | 19.33 | 19.13 | 19.08 | 19.07 |
| 1540.54 | 19.95 | 19.66 | 19.49 | 19.26 | 18.99 | 18.94 | 19.03 |
| 1660.48 | 19.85 | 19.59 | 19.33 | 19.09 | 18.96 | 18.89 | 18.91 |
| 1789.83 | 20.19 | 19.85 | 19.64 | 19.37 | 19.17 | 19.09 | 19.11 |
| 1929.34 | 19.88 | 19.57 | 19.28 | 19.09 | 18.89 | 18.88 | 18.84 |
| 2079.8  | 19.89 | 19.54 | 19.32 | 19.04 | 18.76 | 18.82 | 18.88 |
| 2242.08 | 19.93 | 19.76 | 19.43 | 19.15 | 18.89 | 18.77 | 18.67 |
| 2417.1  | 19.68 | 19.37 | 19.13 | 18.86 | 18.60 | 18.48 | 18.49 |
| 2605.85 | 19.78 | 19.52 | 19.37 | 19.08 | 18.90 | 18.74 | 18.86 |
| 2809.43 | 19.52 | 19.32 | 19.03 | 18.76 | 18.61 | 18.52 | 18.56 |
| 3028.99 | 18.97 | 18.64 | 18.46 | 18.22 | 17.99 | 17.96 | 17.95 |
| 3265.79 | 18.98 | 18.77 | 18.65 | 18.31 | 18.06 | 17.99 | 18.05 |
| 3521.18 | 19.12 | 18.88 | 18.64 | 18.41 | 18.16 | 18.03 | 18.09 |
| 3796.62 | 19.23 | 19.05 | 18.79 | 18.52 | 18.24 | 18.16 | 18.27 |

**Table S6.** Raw data of fs-TA signals of A-RC-A collected under UV ( $\lambda_{\text{ex}} = 295 \text{ nm}$ ) excitation in the  $\lambda_{\text{pr}} = 320\text{--}670 \text{ nm}$  regime, the unit of  $\Delta A$  in the table is mOD.

| Wavelength<br>Time<br>(ps) | 320.70 | 322.11 | 323.52 | 324.93 | 326.34 | 327.75 | 329.16 | 330.56 | 331.97 | 333.38 | 334.79 |
|----------------------------|--------|--------|--------|--------|--------|--------|--------|--------|--------|--------|--------|
| -3.28                      | -0.32  | 0.43   | 0.21   | 0.26   | 0.44   | 0.01   | 0.02   | 0.10   | 0.19   | 0.09   | 0.10   |
| -2.78                      | 0.59   | 0.03   | 0.17   | 0.03   | 0.19   | -0.03  | 0.05   | -0.23  | 0.19   | 0.13   | 0.33   |
| -2.28                      | 0.15   | -0.84  | -0.23  | -0.31  | -0.34  | -0.28  | -0.26  | -0.19  | -0.35  | -0.21  | 0.12   |
| -1.78                      | -0.19  | 0.15   | 0.71   | -0.68  | -0.26  | -0.20  | 0.08   | -0.01  | -0.49  | -0.33  | -0.18  |
| -1.28                      | 0.31   | 0.30   | -0.07  | 0.16   | 0.25   | 0.75   | 0.27   | -0.32  | 0.15   | 0.28   | -0.23  |
| -0.78                      | 0.49   | 0.51   | -0.80  | -0.08  | -0.01  | -0.18  | -0.36  | 0.49   | -0.07  | 0.29   | -0.03  |
| -0.28                      | -1.18  | 0.00   | 0.23   | 0.10   | -0.04  | -0.07  | -0.09  | -0.20  | 0.25   | -0.40  | 0.10   |
| 0.22                       | 0.57   | -0.87  | -0.20  | 0.37   | 0.00   | -0.25  | -0.19  | 0.05   | -0.06  | -0.01  | -0.17  |
| 0.32                       | -0.61  | -0.22  | 0.20   | 0.17   | 0.05   | 0.51   | 0.30   | 0.19   | 0.16   | -0.14  | -0.16  |
| 0.42                       | 0.21   | 0.50   | -0.22  | -0.03  | -0.27  | -0.28  | 0.18   | 0.12   | 0.03   | 0.31   | 0.12   |
| 0.52                       | 0.50   | 0.17   | 0.71   | 0.04   | 0.50   | 0.72   | 0.54   | 0.73   | 0.45   | 0.06   | -0.52  |
| 0.62                       | 0.29   | -0.10  | 0.24   | -0.21  | -0.42  | 0.84   | 0.38   | 0.52   | 0.37   | 0.55   | 0.44   |
| 0.72                       | 0.08   | -0.47  | 0.73   | 0.08   | 0.35   | 0.39   | -0.03  | -0.30  | -0.36  | -0.47  | -0.30  |
| 0.77                       | 0.01   | -0.15  | 0.48   | -0.21  | 0.31   | 0.43   | 0.06   | -0.05  | -0.28  | -0.02  | -0.36  |
| 0.82                       | -0.77  | -0.67  | 0.21   | -0.25  | -1.15  | 0.46   | -0.15  | -0.78  | -0.78  | -0.39  | -0.70  |
| 0.87                       | 0.36   | -0.10  | -0.06  | -0.06  | -0.26  | 0.30   | 0.04   | -0.27  | 0.00   | -0.25  | 0.02   |
| 0.92                       | -0.10  | -0.05  | 0.04   | 0.38   | -0.17  | 0.13   | -0.03  | -0.08  | -0.52  | 0.00   | -0.50  |
| 0.97                       | -0.05  | -0.77  | 0.48   | -0.25  | 0.40   | 0.05   | -0.01  | -0.21  | -0.07  | 0.11   | -0.04  |
| 1.02                       | -0.45  | -0.19  | 0.28   | 0.29   | -0.36  | 0.21   | 0.13   | -0.13  | -0.26  | -0.07  | -0.14  |



|      |       |       |       |       |       |       |       |       |       |       |       |
|------|-------|-------|-------|-------|-------|-------|-------|-------|-------|-------|-------|
| 1.07 | -0.33 | 0.41  | -0.48 | 0.47  | 0.06  | -0.27 | -0.60 | -0.22 | -0.30 | -0.79 | -0.40 |
| 1.12 | 0.15  | 0.35  | -0.13 | 0.12  | 0.45  | 0.50  | 0.14  | 0.25  | 0.06  | -0.43 | -0.16 |
| 1.17 | 0.65  | -0.34 | -0.67 | 0.12  | 0.29  | 0.21  | 0.09  | -0.13 | -0.83 | -0.59 | -0.30 |
| 1.22 | -1.07 | 0.11  | 0.97  | -0.22 | 0.07  | 0.07  | 0.03  | -0.13 | -0.55 | 0.14  | -0.30 |
| 1.27 | -0.96 | 0.09  | -0.12 | -0.54 | 0.02  | 0.00  | -0.32 | -0.46 | -0.47 | -1.04 | -0.47 |
| 1.32 | -0.89 | -0.14 | -0.04 | 0.21  | -0.30 | -0.50 | 0.06  | -0.10 | -0.95 | -0.16 | -0.35 |
| 1.37 | -0.28 | -0.76 | -0.39 | -0.05 | 0.17  | 0.37  | 0.24  | 0.19  | -0.63 | -0.15 | 0.15  |
| 1.42 | 0.16  | -0.59 | -0.04 | 0.07  | 0.12  | 0.05  | 0.36  | -0.16 | -0.72 | -0.15 | -0.06 |
| 1.47 | 0.17  | -1.12 | 0.11  | 0.58  | -0.27 | -0.21 | 0.40  | 0.32  | -0.35 | 0.10  | 0.47  |
| 1.52 | -0.36 | -0.38 | 0.06  | -0.18 | -0.26 | -0.02 | -0.75 | -0.20 | -0.47 | -0.09 | -0.34 |
| 1.57 | -0.52 | -0.51 | 0.84  | -0.23 | -0.58 | 0.12  | 0.00  | -0.79 | 0.00  | -0.09 | -0.62 |
| 1.62 | -0.68 | -0.44 | -0.38 | 0.11  | 0.42  | 0.01  | -0.53 | -0.53 | -0.79 | -0.19 | -0.29 |
| 1.67 | 0.29  | 0.08  | -0.63 | 0.31  | -0.14 | -0.06 | -0.02 | -0.36 | 0.00  | -0.27 | -0.53 |
| 1.72 | -0.31 | -0.63 | -0.29 | -0.31 | -0.15 | -0.29 | -0.64 | -0.80 | -0.78 | -0.56 | -0.66 |
| 1.77 | 0.13  | -0.23 | 0.07  | -0.03 | -0.29 | 0.62  | 0.50  | -0.16 | -0.09 | -0.14 | -0.17 |
| 1.82 | -0.19 | 0.14  | -0.36 | -0.19 | 0.15  | 1.15  | -0.84 | 0.74  | -0.13 | -0.24 | -0.31 |
| 1.87 | 0.43  | -1.05 | 0.09  | -0.38 | -0.71 | -0.18 | -0.15 | -0.51 | -0.81 | -0.41 | -0.55 |
| 1.92 | 0.56  | -0.32 | -0.08 | -0.18 | -0.13 | 0.32  | -0.16 | 0.11  | -0.44 | -0.12 | -0.02 |
| 1.97 | 0.07  | -0.17 | -0.11 | 0.04  | 0.10  | 0.62  | 0.27  | 0.10  | -0.20 | 0.30  | 0.22  |
| 2.02 | -0.08 | -0.97 | 0.53  | 0.07  | -0.24 | -0.59 | 0.15  | -0.26 | -0.30 | -0.09 | -0.46 |
| 2.07 | 0.41  | -0.82 | 0.23  | 0.68  | -0.14 | -0.09 | 0.41  | -0.59 | -0.14 | 0.00  | -0.03 |
| 2.12 | -0.13 | -0.37 | -0.15 | 0.20  | -0.87 | 0.12  | -0.01 | -0.33 | -0.53 | -0.39 | -0.31 |
| 2.17 | -0.95 | -1.09 | -0.15 | 0.16  | -0.14 | 0.09  | -0.55 | -0.31 | -0.18 | -0.26 | -0.86 |
| 2.22 | -0.50 | 0.21  | -0.27 | -0.70 | -0.22 | -0.24 | 0.21  | -0.20 | -0.45 | -0.96 | -0.37 |
| 2.27 | -0.63 | -0.07 | -0.25 | 0.23  | -0.54 | -0.02 | -0.21 | -0.15 | -0.44 | -0.64 | -0.13 |
| 2.32 | 0.31  | 0.00  | -0.06 | -0.13 | 0.44  | -0.13 | -0.04 | -0.28 | -0.51 | 0.25  | -0.15 |
| 2.37 | 0.27  | -0.12 | -0.32 | 0.23  | -0.11 | 0.36  | 0.04  | 0.17  | -0.16 | 0.07  | -0.07 |
| 2.42 | -0.38 | -0.86 | -0.19 | 0.31  | -0.31 | -0.09 | -0.44 | -0.84 | -0.17 | -0.16 | -0.49 |
| 2.47 | -0.38 | -0.76 | -0.50 | -0.21 | 0.44  | -0.10 | -0.61 | -0.06 | -0.24 | -0.35 | -0.15 |
| 2.52 | 0.76  | 0.73  | 0.21  | -0.94 | -0.62 | 0.63  | -0.60 | -0.14 | -0.42 | -0.25 | -0.06 |
| 2.57 | 0.75  | 0.03  | 0.00  | 0.48  | -0.23 | -0.40 | -0.14 | -0.23 | -0.18 | 0.10  | -0.17 |
| 2.62 | 0.10  | -1.17 | -0.29 | -0.02 | 0.55  | 0.26  | -0.17 | -0.27 | -0.46 | -0.42 | -0.28 |
| 2.67 | 0.20  | -0.18 | -0.42 | -0.44 | -0.23 | -0.05 | -0.59 | -0.72 | -0.91 | -0.40 | -0.36 |
| 2.72 | -0.44 | -0.51 | 0.30  | -0.71 | -0.42 | -0.21 | -0.55 | -0.59 | -0.38 | -0.63 | -0.07 |
| 2.77 | 0.09  | -0.64 | 0.25  | -0.13 | 0.08  | -0.59 | -0.57 | -0.61 | -0.49 | -0.50 | -0.36 |
| 2.82 | -0.96 | -0.12 | -0.43 | -0.34 | 0.34  | 0.33  | -0.15 | -0.31 | -0.87 | -0.30 | -0.23 |
| 2.87 | 0.32  | 0.05  | 0.44  | -0.02 | -0.93 | -0.29 | 0.38  | -0.64 | -0.24 | 0.07  | -0.16 |
| 2.92 | 0.17  | 0.30  | 0.54  | -0.17 | -0.34 | -0.10 | -0.32 | 0.00  | -0.71 | -0.34 | -0.30 |
| 2.97 | -0.40 | 0.33  | -0.07 | -0.93 | -0.16 | 0.13  | -1.04 | -0.73 | -0.14 | -0.81 | -0.78 |
| 3.02 | -0.17 | -0.10 | 0.31  | -0.52 | 0.62  | 0.07  | -0.16 | 0.17  | 0.10  | 0.02  | -0.08 |
| 3.07 | -0.66 | 0.04  | -0.63 | 0.09  | -0.01 | -0.36 | -0.34 | -0.65 | -0.15 | -0.63 | -0.41 |
| 3.12 | -0.56 | 0.15  | -0.11 | -0.01 | -0.23 | -0.40 | 0.09  | -0.16 | -0.46 | -0.62 | -0.22 |
| 3.17 | 0.25  | -0.28 | -0.51 | -0.61 | -0.43 | -0.30 | -0.38 | -0.32 | -0.87 | -0.95 | -0.78 |
| 3.22 | -0.12 | -0.52 | 0.28  | -0.25 | -0.39 | 0.38  | -0.23 | -0.49 | -0.81 | -0.28 | -0.46 |
| 3.27 | -0.16 | -0.26 | 0.71  | 0.60  | 0.37  | 0.83  | -0.04 | -0.25 | 0.02  | -0.29 | -0.42 |
| 3.32 | 0.30  | 0.10  | -0.76 | 0.23  | 0.39  | 0.45  | -0.48 | 0.36  | -0.33 | -0.21 | -0.12 |
| 3.37 | 0.25  | -0.41 | -0.74 | 0.45  | -0.11 | -0.21 | -0.35 | -0.09 | -1.07 | -0.28 | -0.43 |
| 3.42 | -0.37 | -0.10 | -0.10 | -0.24 | -0.17 | -0.17 | -0.55 | 0.26  | -0.18 | -0.62 | -0.58 |
| 3.47 | -0.59 | -0.40 | -0.02 | -0.36 | -0.19 | 0.06  | -0.55 | -0.17 | -0.69 | -0.39 | -0.12 |
| 3.52 | 0.05  | -0.67 | -0.01 | 0.25  | 0.05  | 0.38  | -0.38 | 0.11  | -0.48 | 0.02  | -0.32 |

|       |       |       |       |       |       |       |       |       |       |       |       |
|-------|-------|-------|-------|-------|-------|-------|-------|-------|-------|-------|-------|
| 3.57  | 0.57  | 0.31  | -0.49 | 0.06  | 0.20  | -0.63 | -0.39 | -0.18 | -0.19 | -0.46 | -0.45 |
| 3.62  | -0.29 | -0.46 | -0.24 | -0.41 | 0.32  | -0.42 | -0.54 | -0.19 | -0.22 | -0.33 | -0.71 |
| 3.67  | 0.19  | -0.75 | 0.90  | 0.70  | 0.16  | -0.05 | 0.15  | 0.45  | -0.27 | -0.08 | -0.12 |
| 3.72  | 0.51  | -0.98 | 0.16  | -0.38 | 0.46  | -0.24 | 0.11  | -0.28 | -0.49 | -0.39 | -0.15 |
| 3.92  | -0.18 | 0.07  | 0.07  | 0.14  | 0.61  | 0.26  | -0.85 | -0.43 | -0.36 | -0.26 | -0.36 |
| 4.12  | 0.08  | -0.84 | 0.59  | -0.17 | -0.47 | -0.38 | -0.12 | -0.92 | -0.56 | -0.68 | -0.82 |
| 4.32  | -0.13 | -0.17 | -0.51 | 0.37  | -0.08 | 0.29  | 0.00  | 0.02  | 0.04  | -0.34 | -0.47 |
| 4.52  | -0.22 | 0.40  | -0.02 | -0.07 | 0.42  | -0.29 | -0.56 | -0.84 | -0.37 | -0.22 | -0.14 |
| 4.72  | -0.29 | 0.25  | -0.50 | -1.16 | 0.18  | -0.75 | -0.51 | 0.04  | 0.05  | -0.26 | -0.34 |
| 4.92  | 0.21  | -0.52 | -0.50 | -0.44 | 0.29  | -0.21 | -0.16 | -0.10 | -0.21 | -0.15 | -0.18 |
| 5.12  | -0.86 | 0.23  | 0.34  | -0.27 | 0.14  | -0.24 | -0.28 | -0.65 | 0.00  | -0.57 | -0.24 |
| 5.32  | 0.12  | -0.37 | -0.49 | 0.75  | 0.28  | -0.54 | -0.53 | -0.21 | -0.42 | -0.68 | -0.25 |
| 5.52  | -0.11 | -0.43 | 0.16  | -0.10 | -0.19 | -0.28 | -0.07 | -0.64 | -0.48 | -0.16 | 0.12  |
| 5.72  | 0.49  | 0.03  | 0.30  | -0.41 | 0.22  | -0.32 | -0.69 | -0.19 | -0.61 | -0.79 | -0.60 |
| 5.92  | 0.41  | 1.17  | -0.03 | -0.34 | 0.21  | 0.66  | -0.59 | -0.23 | -0.26 | -0.66 | 0.17  |
| 6.12  | -0.16 | -0.39 | -0.26 | 0.48  | 0.60  | 0.16  | -0.37 | -0.22 | -0.34 | -0.56 | -0.27 |
| 6.32  | -0.37 | -0.04 | -0.08 | -0.79 | 0.01  | -0.50 | -0.35 | -0.25 | 0.02  | -0.48 | -0.15 |
| 6.52  | 0.08  | -0.12 | 0.03  | 0.26  | -0.11 | -0.18 | 0.01  | 0.10  | 0.18  | -0.30 | -0.20 |
| 6.72  | 0.45  | 0.53  | 0.55  | -0.19 | -0.07 | -0.40 | 0.20  | -0.59 | -0.35 | -0.06 | -0.70 |
| 6.92  | -0.27 | -0.33 | 0.00  | -0.88 | -0.13 | 0.44  | -0.28 | -0.53 | -0.43 | -0.52 | -0.47 |
| 7.12  | -0.63 | -0.20 | 1.17  | 0.13  | -0.49 | 0.21  | 0.39  | -0.82 | -0.73 | 0.14  | -0.20 |
| 7.32  | 0.34  | -0.66 | 0.03  | -0.02 | 0.47  | -0.10 | -0.36 | -0.17 | -0.06 | -0.28 | -0.49 |
| 7.52  | 0.36  | -0.06 | 0.63  | 0.09  | -0.23 | -0.27 | -0.21 | -0.39 | -0.62 | -0.35 | -0.31 |
| 7.72  | 0.28  | -1.18 | -0.31 | 0.50  | -0.20 | 0.50  | 0.36  | 0.08  | -0.27 | 0.28  | 0.00  |
| 7.92  | 0.07  | -0.08 | -0.34 | 0.60  | -0.37 | -0.28 | -0.28 | -0.72 | -0.75 | -0.22 | -0.63 |
| 8.12  | 0.85  | -1.07 | 0.47  | 0.68  | -0.09 | -0.07 | 0.03  | 0.06  | -0.52 | -0.13 | 0.46  |
| 8.32  | -0.02 | -0.66 | 0.95  | -0.17 | -0.31 | 0.44  | -0.34 | -0.18 | -0.68 | -0.16 | -0.04 |
| 8.52  | 0.15  | -0.05 | -1.06 | -0.18 | 0.03  | -0.34 | -0.57 | -0.25 | -0.43 | -0.38 | -0.37 |
| 8.72  | -0.01 | 0.39  | -0.26 | -0.30 | -0.15 | 0.07  | -0.63 | -0.73 | -0.38 | -0.46 | -0.33 |
| 8.92  | 0.22  | -0.03 | -0.23 | -0.36 | 0.17  | 0.02  | 0.06  | -0.59 | 0.00  | -0.02 | -0.60 |
| 9.12  | -0.22 | -0.44 | 0.76  | -0.16 | -0.43 | 0.02  | -0.38 | -0.53 | -0.70 | -0.12 | -0.28 |
| 9.32  | -0.21 | -0.29 | -0.03 | -0.12 | 0.09  | 0.48  | -0.23 | 0.10  | -0.22 | -0.04 | -0.13 |
| 9.52  | 0.75  | -0.25 | -0.14 | -0.34 | -0.47 | -0.75 | -0.14 | -0.45 | -0.56 | -0.23 | -0.23 |
| 9.72  | -0.43 | 0.12  | 0.77  | -0.24 | -0.23 | 0.58  | -0.08 | -0.23 | -0.36 | -0.13 | -0.48 |
| 9.92  | 0.07  | -0.59 | -0.74 | -0.60 | 0.27  | -0.49 | -0.38 | -0.74 | -0.41 | -0.26 | -0.71 |
| 10.12 | 1.04  | -0.21 | -0.57 | 0.22  | 0.40  | -0.84 | -1.22 | -0.05 | -0.03 | -0.56 | -0.01 |
| 10.32 | -0.24 | 0.12  | -0.94 | 0.24  | -0.52 | -0.04 | 0.03  | -0.79 | -0.65 | -0.64 | -0.23 |
| 10.52 | 0.22  | 0.11  | -0.24 | -0.26 | -0.23 | 0.53  | -0.31 | -0.39 | -0.46 | -0.08 | -0.63 |
| 10.72 | -0.40 | -1.61 | 0.02  | 0.21  | -0.23 | -0.16 | 0.01  | -0.03 | -0.67 | -0.26 | -0.20 |
| 10.92 | 0.07  | 0.20  | -0.14 | -0.13 | -0.56 | -0.22 | 0.09  | -0.58 | -0.35 | -0.49 | -0.46 |
| 11.12 | 0.09  | -0.21 | 0.38  | -0.67 | 0.07  | -0.68 | -0.10 | -0.29 | -0.42 | -0.05 | -0.60 |
| 11.32 | -0.03 | -0.29 | -0.12 | -0.02 | 0.19  | -0.31 | -0.13 | 0.15  | -0.24 | -0.22 | -0.18 |
| 11.52 | 0.16  | 0.13  | 0.02  | -0.71 | -0.12 | -0.23 | -0.21 | -0.38 | -0.87 | -0.58 | -0.38 |
| 11.72 | 0.17  | -1.17 | 0.55  | 0.37  | -0.91 | 0.76  | -0.78 | -0.65 | -0.43 | 0.42  | -0.22 |
| 11.92 | -0.02 | -0.30 | 0.12  | -0.11 | 0.44  | -0.26 | -0.05 | 0.35  | 0.19  | -0.26 | -0.52 |
| 12.12 | -0.37 | 0.54  | 0.20  | 0.06  | -0.02 | 0.39  | -0.43 | -0.59 | -0.19 | -0.27 | -0.25 |
| 12.32 | 0.56  | -0.40 | 0.09  | -0.09 | -0.08 | 0.23  | -0.05 | 0.22  | 0.25  | -0.29 | 0.19  |
| 12.52 | 0.13  | -0.17 | -0.24 | -0.03 | -0.80 | -0.40 | 0.37  | -0.27 | -0.74 | -0.21 | -0.15 |
| 12.72 | -0.41 | -0.26 | -0.15 | 0.15  | -0.11 | -0.20 | -0.70 | -0.47 | -0.33 | -0.83 | -0.65 |
| 12.92 | -0.58 | -0.66 | 0.45  | -0.06 | -0.23 | -0.02 | -0.52 | -0.45 | -0.24 | 0.09  | -0.33 |

|       |       |       |       |       |       |       |       |       |       |       |       |
|-------|-------|-------|-------|-------|-------|-------|-------|-------|-------|-------|-------|
| 13.12 | -1.18 | 0.18  | 0.53  | -1.07 | -0.05 | 0.20  | 0.10  | -0.80 | -0.32 | 0.15  | -0.17 |
| 13.32 | -0.68 | -0.19 | -0.58 | -0.04 | -0.21 | -0.55 | 0.12  | -0.14 | -0.18 | -0.63 | -0.31 |
| 13.52 | -0.41 | 0.24  | -0.12 | -0.07 | -0.87 | -0.27 | -0.20 | -0.34 | -0.49 | -0.39 | -0.48 |
| 13.72 | -0.25 | -0.16 | 0.11  | -0.23 | 0.29  | 0.15  | 0.02  | -0.08 | -0.23 | -0.08 | -0.23 |
| 13.92 | -0.69 | -0.09 | 0.14  | -0.36 | 0.26  | 0.39  | -0.07 | -0.79 | 0.03  | 0.38  | -0.43 |
| 14.00 | 0.67  | 0.18  | -0.01 | 0.30  | 0.01  | 0.51  | -0.06 | -0.30 | 0.28  | -0.01 | 0.30  |
| 14.08 | 1.01  | -0.76 | -0.02 | 0.37  | -0.76 | -0.34 | -0.34 | -0.47 | -0.81 | -0.39 | -0.19 |
| 14.17 | 0.73  | 0.05  | -0.71 | -0.10 | 0.25  | -0.05 | -0.49 | -0.19 | -0.64 | -0.36 | -0.80 |
| 14.27 | 0.45  | -0.29 | -0.17 | -0.36 | -0.14 | -0.41 | 0.00  | -0.34 | -0.47 | -0.52 | -0.46 |
| 14.38 | -0.56 | 0.35  | 0.02  | -0.98 | -0.24 | 0.25  | -0.83 | -0.75 | -0.74 | -0.07 | -0.66 |
| 14.49 | -0.23 | -0.50 | -0.77 | 0.39  | 0.86  | 0.67  | -0.10 | 0.21  | 0.12  | 0.57  | 0.11  |
| 14.61 | 0.03  | -0.98 | -0.06 | -0.73 | -0.07 | -0.22 | -0.77 | -0.67 | -0.41 | -0.31 | -0.22 |
| 14.75 | 0.06  | 0.22  | -0.65 | 0.20  | -0.64 | 0.15  | -0.09 | -0.73 | -0.09 | -0.61 | -0.67 |
| 14.89 | -0.41 | -0.64 | 0.18  | -0.42 | -0.76 | -0.51 | -0.08 | 0.05  | -0.31 | -0.69 | -0.08 |
| 15.05 | 0.44  | 0.36  | 0.97  | 0.19  | -0.18 | 0.31  | -0.81 | 0.12  | -0.16 | 0.00  | -0.38 |
| 15.21 | -0.54 | 0.09  | -0.23 | -0.30 | -0.20 | -0.30 | -0.20 | 0.34  | -0.14 | -0.01 | -0.11 |
| 15.39 | -0.04 | 0.29  | 0.34  | 0.28  | -0.81 | 0.20  | -0.25 | -0.42 | -0.01 | -0.30 | -0.26 |
| 15.59 | 0.28  | -0.13 | 0.19  | -0.10 | -0.57 | -0.12 | -0.12 | 0.10  | -0.33 | -0.23 | 0.17  |
| 15.80 | 0.36  | -0.33 | 0.19  | 0.03  | -0.52 | -0.07 | -0.08 | 0.04  | -0.28 | -0.60 | -0.47 |
| 16.02 | 0.31  | 0.47  | -0.65 | -0.52 | 0.71  | -0.28 | 0.38  | -0.32 | -0.64 | -0.59 | -0.31 |
| 16.27 | -0.25 | -0.59 | -0.60 | 0.20  | -0.68 | 0.16  | -0.25 | -0.49 | -0.82 | -0.56 | -0.72 |
| 16.53 | -0.29 | -0.33 | -0.29 | 0.06  | 0.03  | -0.12 | 0.01  | -0.40 | -0.29 | -0.61 | -0.55 |
| 16.81 | 0.01  | -0.11 | 0.40  | 0.09  | 0.05  | -0.21 | 0.22  | -0.41 | -0.36 | -0.38 | -0.39 |
| 17.12 | -0.67 | -0.79 | -0.83 | 0.35  | 0.08  | -0.46 | -0.48 | -0.33 | -0.60 | -0.23 | -0.19 |
| 17.45 | -0.70 | -0.23 | -0.08 | -0.38 | -0.58 | -0.09 | -0.64 | -0.54 | -0.12 | -0.48 | 0.00  |
| 17.81 | -0.47 | 0.08  | 0.28  | -0.52 | 0.35  | -0.40 | -0.19 | 0.16  | -0.40 | -0.09 | -0.63 |
| 18.19 | 0.35  | -0.49 | 0.39  | -0.31 | -0.08 | 0.21  | 0.10  | -0.16 | -0.37 | -0.30 | -0.23 |
| 18.60 | -0.43 | -0.44 | -0.28 | -0.60 | -0.01 | 0.22  | -0.27 | 0.09  | -0.46 | 0.12  | -0.06 |
| 19.05 | -0.25 | 0.37  | 0.50  | -0.28 | -0.15 | 0.08  | -0.07 | -0.14 | 0.00  | -0.08 | -0.34 |
| 19.53 | 0.08  | -0.41 | -0.18 | -0.32 | -0.43 | 0.09  | -0.12 | 0.17  | 0.12  | 0.06  | 0.30  |
| 20.05 | -0.74 | 0.33  | 0.74  | -0.36 | -0.02 | -0.09 | -0.14 | -0.38 | -0.09 | -0.08 | 0.03  |
| 20.61 | 0.43  | -0.63 | -0.56 | -0.07 | 0.01  | -0.04 | -0.09 | -0.05 | -0.37 | -0.28 | -0.51 |
| 21.22 | -0.43 | -0.58 | 0.60  | -0.14 | 0.31  | -0.08 | -0.15 | -0.17 | -0.44 | -0.34 | -0.31 |
| 21.87 | 0.05  | -0.32 | 0.04  | 0.01  | 0.58  | 0.00  | -0.12 | -0.68 | -0.34 | -0.20 | -0.38 |
| 22.57 | 0.12  | 0.89  | 0.72  | -0.13 | 0.49  | 0.20  | 0.14  | 0.64  | 0.21  | 0.34  | 0.12  |
| 23.33 | -0.39 | 0.54  | -0.84 | -0.24 | -0.10 | -0.21 | -0.68 | -0.71 | -0.31 | -0.22 | -0.27 |
| 24.15 | -0.69 | 0.04  | -0.08 | -0.59 | -0.09 | 0.12  | -0.16 | -0.03 | 0.13  | 0.00  | -0.34 |
| 25.03 | -0.01 | -0.72 | -0.39 | -0.41 | -0.08 | 0.03  | -0.83 | -0.61 | -0.51 | -0.48 | -0.04 |
| 25.98 | -0.33 | -0.04 | -0.36 | -0.24 | -0.37 | -0.05 | -0.11 | 0.13  | -0.51 | -0.04 | -0.05 |
| 27.01 | 0.28  | -0.33 | -0.07 | -0.05 | -0.27 | 0.31  | 0.33  | -0.05 | -0.33 | -0.25 | 0.13  |
| 28.11 | -0.19 | -0.32 | -0.80 | -0.48 | 0.10  | 0.32  | -0.74 | -0.25 | -0.35 | -0.17 | -0.45 |
| 29.30 | -0.23 | -0.61 | 0.11  | -0.27 | -0.39 | -0.42 | -0.09 | -0.13 | -0.66 | -0.63 | -0.05 |
| 30.59 | -0.15 | 0.22  | 0.59  | -0.77 | 0.34  | -0.25 | -0.19 | 0.11  | -0.23 | 0.23  | -0.02 |
| 31.98 | 0.46  | -0.49 | 0.23  | -0.11 | -0.21 | 0.37  | -0.57 | -0.45 | -0.55 | -0.20 | -0.13 |
| 33.47 | 0.08  | -0.18 | -0.10 | -0.70 | -0.65 | 0.26  | -0.29 | -0.41 | -0.38 | -0.20 | -0.49 |
| 35.09 | 0.07  | 0.11  | -0.19 | 0.39  | -0.46 | 0.29  | 0.21  | -0.19 | 0.03  | 0.12  | 0.17  |
| 36.83 | -0.46 | -0.24 | -0.04 | -0.47 | -0.45 | -0.33 | -0.88 | -0.36 | -0.09 | -0.01 | -0.10 |
| 38.71 | 0.15  | 0.83  | 0.56  | 0.18  | 0.06  | -0.13 | -0.02 | 0.03  | -0.50 | -0.54 | -0.34 |
| 40.73 | -0.05 | -0.89 | 0.32  | 0.41  | 0.06  | -0.08 | 0.23  | 0.27  | -0.34 | -0.29 | -0.51 |
| 42.92 | 0.13  | -0.49 | -0.06 | -0.23 | -0.13 | -0.30 | -0.07 | -0.77 | -0.98 | -0.27 | -0.40 |

|         |       |       |       |       |       |       |       |       |       |       |       |
|---------|-------|-------|-------|-------|-------|-------|-------|-------|-------|-------|-------|
| 45.27   | -0.57 | -0.51 | -0.72 | -0.34 | -0.11 | 0.00  | 0.00  | -0.61 | -0.43 | -0.34 | -0.91 |
| 47.81   | 0.61  | -0.12 | 0.36  | 0.38  | 0.26  | 0.13  | 0.50  | -0.44 | -0.03 | 0.03  | -0.07 |
| 50.55   | -0.10 | -0.52 | 0.16  | -0.17 | 0.22  | 0.00  | -0.31 | 0.02  | -0.32 | -0.07 | 0.04  |
| 53.51   | -0.39 | 0.05  | 0.28  | -0.60 | 0.46  | 0.70  | -0.39 | 0.14  | -0.07 | 0.02  | 0.17  |
| 56.69   | 0.41  | -0.43 | 0.75  | 1.14  | 0.31  | -0.56 | -0.62 | -0.29 | -0.20 | -0.39 | 0.12  |
| 60.13   | 0.09  | 0.22  | 0.18  | -0.02 | 0.06  | 0.58  | -0.11 | -0.31 | -0.46 | 0.01  | 0.09  |
| 63.84   | -0.47 | 0.35  | 0.04  | -0.22 | -0.41 | 0.16  | -0.36 | -0.24 | -0.09 | 0.03  | 0.04  |
| 67.83   | 0.09  | -0.05 | 0.52  | 0.60  | 0.50  | -0.86 | -0.21 | 0.01  | -0.43 | 0.24  | 0.18  |
| 72.15   | -0.17 | 0.54  | -0.03 | -0.09 | 0.02  | 0.60  | -0.11 | -0.10 | -0.38 | -0.22 | -0.10 |
| 76.80   | -0.02 | -0.54 | -0.47 | -0.45 | 0.52  | -0.11 | 0.13  | 0.24  | -0.28 | -0.14 | -0.01 |
| 81.81   | -0.24 | -0.01 | 0.17  | 0.09  | 0.49  | -0.54 | -0.23 | -0.44 | -0.70 | -0.03 | -0.17 |
| 87.22   | -0.97 | -0.63 | -0.46 | 0.66  | -0.40 | -0.78 | -0.58 | -0.38 | -0.85 | -0.51 | -0.13 |
| 93.06   | -0.46 | -0.79 | -0.19 | -0.28 | 0.26  | 0.46  | -0.63 | -0.43 | -0.52 | -0.60 | -0.35 |
| 99.35   | 0.08  | 0.17  | -0.03 | -0.15 | 0.39  | 0.54  | 0.28  | -0.34 | -0.06 | 0.35  | -0.09 |
| 106.13  | -0.94 | -0.35 | 0.68  | 0.62  | -0.40 | 0.06  | 0.04  | -0.06 | -0.36 | -0.03 | -0.32 |
| 113.45  | 0.56  | -0.78 | -0.71 | -0.37 | 0.05  | -0.30 | 0.04  | -0.43 | -0.56 | -0.39 | -0.15 |
| 121.34  | -0.35 | -0.02 | -0.01 | -0.78 | -0.48 | -0.43 | 0.01  | -0.48 | -0.47 | -0.66 | -0.66 |
| 129.86  | -0.76 | -0.29 | 0.63  | 0.30  | -0.15 | 0.27  | 0.41  | -0.22 | 0.22  | 0.17  | 0.01  |
| 139.04  | 0.29  | -0.74 | 0.14  | 0.68  | 0.76  | -0.07 | -0.04 | 0.35  | -0.06 | -0.10 | 0.33  |
| 148.94  | 0.07  | -0.50 | 0.37  | -0.32 | 0.23  | -0.28 | -0.82 | -0.28 | -0.48 | -0.36 | -0.01 |
| 159.62  | 0.00  | -0.52 | -0.61 | -0.16 | 0.13  | 0.67  | -0.39 | -0.05 | -0.20 | 0.02  | -0.12 |
| 171.14  | 0.01  | -0.96 | -0.34 | -0.16 | -0.60 | 0.17  | -0.39 | -0.32 | -0.43 | -0.58 | -0.60 |
| 183.56  | -0.16 | -0.55 | 0.77  | 0.50  | -0.44 | 0.02  | 0.29  | 0.45  | -0.20 | -0.43 | -0.08 |
| 196.96  | 0.26  | -0.16 | -0.11 | 0.32  | 0.08  | -0.03 | 0.53  | -0.39 | -0.91 | -0.54 | -0.28 |
| 211.41  | -0.19 | -0.32 | -0.17 | 0.39  | 0.32  | 0.30  | -0.07 | 0.05  | -0.53 | -0.84 | -0.14 |
| 226.99  | -0.02 | -0.12 | 0.93  | 0.60  | 0.12  | 0.46  | 0.30  | 0.48  | 0.47  | -0.11 | 0.45  |
| 243.80  | -0.10 | -0.11 | -0.40 | 0.27  | -0.04 | -0.58 | -0.35 | -0.30 | -0.61 | -0.59 | -0.16 |
| 261.93  | 0.41  | -0.42 | -0.22 | -0.52 | -0.10 | -0.16 | 0.48  | -0.25 | 0.20  | 0.20  | 0.22  |
| 281.48  | -0.05 | 0.44  | 0.10  | -0.15 | -0.07 | -0.46 | -0.17 | -0.33 | -0.36 | -0.10 | -0.20 |
| 302.56  | -0.08 | 0.48  | -0.59 | 0.62  | 0.12  | 0.65  | -0.42 | -0.32 | 0.26  | 0.03  | -0.41 |
| 325.30  | -0.45 | 0.46  | 0.48  | 0.66  | 0.30  | 0.37  | 0.13  | -0.13 | 0.27  | 0.18  | -0.23 |
| 349.83  | 0.19  | 0.12  | 0.17  | -0.04 | -0.19 | -0.14 | -0.48 | -0.43 | 0.04  | -0.54 | -0.16 |
| 376.28  | 0.68  | -0.23 | 0.52  | -0.19 | -0.22 | -0.21 | 0.39  | -0.11 | -0.30 | 0.11  | -0.19 |
| 404.81  | -0.68 | -0.32 | -0.07 | 0.07  | 0.05  | 0.52  | -0.45 | 0.13  | -0.02 | -0.32 | -0.09 |
| 435.58  | 0.02  | -0.02 | -0.20 | -0.15 | -0.32 | -0.02 | -0.42 | 0.19  | -0.48 | -0.07 | 0.00  |
| 468.76  | -0.58 | -0.04 | -1.04 | -0.71 | 0.24  | -0.16 | -0.87 | -0.49 | 0.02  | -0.37 | -0.03 |
| 504.55  | 0.14  | -0.43 | 0.38  | 0.22  | 0.18  | 0.36  | 0.14  | -0.43 | 0.00  | -0.10 | 0.01  |
| 543.15  | -0.16 | -0.52 | 0.76  | 0.00  | -0.52 | -0.21 | -0.17 | 0.06  | -0.10 | -0.52 | 0.13  |
| 584.78  | 0.34  | -0.85 | 0.34  | -0.52 | 0.54  | 0.09  | 0.17  | -0.36 | 0.24  | -0.23 | -0.55 |
| 629.68  | 0.03  | -1.02 | -0.48 | 0.10  | -0.09 | -0.17 | -0.51 | -0.33 | -0.61 | -0.32 | -0.38 |
| 678.10  | -0.14 | -0.47 | 1.10  | 0.24  | 0.24  | -0.28 | 0.16  | -0.23 | 0.22  | 0.16  | 0.03  |
| 730.33  | -0.60 | -0.65 | -0.33 | 0.00  | -0.06 | 0.66  | -0.15 | -0.33 | -0.06 | 0.14  | -0.06 |
| 786.65  | -0.88 | 0.01  | -0.75 | -0.57 | 0.18  | -0.40 | -0.87 | -0.39 | -0.42 | -0.71 | -0.34 |
| 847.40  | -0.80 | -0.19 | 0.16  | -0.50 | -0.53 | -0.26 | -0.38 | -0.42 | -0.45 | -0.16 | -0.42 |
| 912.92  | 0.31  | 0.00  | -0.67 | -0.01 | 0.16  | -0.08 | -0.12 | -0.13 | 0.23  | -0.46 | 0.05  |
| 983.58  | -0.05 | -1.04 | -0.62 | -0.29 | -0.25 | 0.08  | -0.04 | -0.07 | -0.65 | 0.05  | -0.02 |
| 1059.78 | 0.71  | -1.05 | -0.61 | -0.03 | 0.32  | -0.09 | -0.01 | -0.32 | -0.51 | 0.03  | -0.44 |
| 1141.98 | 0.32  | -0.60 | 0.17  | -0.43 | 0.18  | -0.24 | -0.05 | 0.00  | -0.38 | -0.43 | 0.38  |
| 1230.62 | -0.26 | -0.56 | -0.66 | -0.20 | 0.50  | 0.41  | -0.17 | 0.41  | 0.15  | 0.06  | -0.05 |
| 1326.23 | -0.20 | 0.34  | 0.65  | -0.18 | 0.42  | 0.45  | 0.19  | -0.10 | 0.15  | 0.25  | 0.44  |

|         |       |       |       |       |       |       |       |       |       |       |       |
|---------|-------|-------|-------|-------|-------|-------|-------|-------|-------|-------|-------|
| 1429.34 | 0.36  | -0.31 | -0.47 | 0.03  | -0.24 | -0.36 | -0.56 | -0.15 | -0.62 | -0.77 | 0.22  |
| 1540.54 | -0.01 | -0.94 | -0.30 | 0.00  | 0.36  | -0.05 | -0.23 | -0.27 | -0.55 | -0.58 | -0.36 |
| 1660.48 | 0.62  | -0.35 | 0.41  | -0.34 | 0.26  | 0.04  | -0.20 | -0.02 | -0.32 | -0.03 | 0.13  |
| 1789.83 | -0.89 | 0.73  | -0.15 | 0.11  | -0.08 | 0.05  | -0.26 | 0.09  | 0.11  | -0.06 | 0.12  |
| 1929.34 | 0.11  | 0.08  | -0.02 | 0.02  | 0.12  | 0.26  | 0.29  | -0.50 | 0.61  | -0.01 | -0.16 |
| 2079.80 | -0.34 | 0.58  | -0.55 | -0.16 | -0.49 | 0.36  | -0.52 | -0.39 | -0.43 | -0.02 | -0.64 |
| 2242.08 | 0.11  | 0.04  | 0.22  | 0.28  | -0.53 | 0.17  | 0.00  | -0.48 | -0.19 | -0.19 | -0.16 |
| 2417.10 | -0.17 | 0.59  | 0.37  | -0.39 | -0.32 | 0.04  | -0.43 | -0.43 | -0.13 | -0.40 | -0.20 |
| 2605.85 | -0.84 | 0.82  | 0.25  | 0.13  | 0.24  | 0.06  | -0.04 | -0.06 | -0.60 | -0.14 | -0.23 |
| 2809.43 | -0.53 | -0.50 | 0.23  | -0.37 | -0.38 | -0.15 | 0.04  | -0.30 | -0.29 | -0.26 | -0.42 |
| 3028.99 | 0.52  | 0.23  | 0.11  | -0.19 | -0.55 | 0.05  | 0.22  | -0.23 | 0.05  | -0.18 | 0.20  |
| 3265.79 | -0.12 | -0.18 | 0.99  | 0.00  | -0.52 | -0.08 | -0.40 | -0.50 | -0.22 | 0.30  | -0.33 |
| 3521.18 | -0.42 | -0.77 | 0.00  | 0.13  | -0.52 | 0.05  | 0.07  | -0.15 | 0.43  | -0.18 | 0.04  |
| 3796.62 | -0.73 | -0.32 | -0.19 | -0.20 | 0.44  | 0.26  | 0.76  | 0.28  | 0.06  | 0.18  | 0.12  |

| Wavelength (nm) \ Time (ps) | 336.20 | 337.61 | 339.02 | 340.42 | 341.83 | 343.24 | 344.65 | 346.06 | 347.47 | 348.87 | 350.28 |
|-----------------------------|--------|--------|--------|--------|--------|--------|--------|--------|--------|--------|--------|
| -3.28                       | 0.19   | 0.00   | 0.30   | 0.22   | 0.29   | 0.27   | 0.18   | 0.09   | 0.25   | 0.20   | 0.29   |
| -2.78                       | 0.12   | -0.13  | -0.11  | -0.08  | -0.19  | -0.19  | -0.08  | -0.03  | 0.24   | -0.18  | -0.14  |
| -2.28                       | -0.22  | -0.13  | -0.09  | -0.01  | -0.13  | -0.15  | -0.02  | -0.24  | -0.14  | -0.02  | 0.03   |
| -1.78                       | 0.03   | -0.17  | -0.10  | -0.25  | 0.03   | -0.10  | 0.08   | 0.27   | -0.09  | -0.06  | -0.05  |
| -1.28                       | 0.11   | 0.11   | -0.26  | -0.17  | 0.03   | 0.02   | -0.23  | 0.01   | -0.05  | 0.21   | 0.02   |
| -0.78                       | -0.25  | 0.27   | 0.01   | -0.05  | 0.02   | -0.01  | 0.05   | -0.23  | -0.04  | -0.04  | -0.32  |
| -0.28                       | 0.14   | 0.14   | 0.24   | 0.13   | -0.03  | -0.01  | 0.08   | 0.23   | -0.04  | 0.06   | 0.12   |
| 0.22                        | -0.20  | -0.17  | -0.23  | 0.13   | -0.04  | 0.20   | -0.11  | -0.17  | 0.01   | 0.03   | 0.09   |
| 0.32                        | 0.26   | -0.02  | 0.19   | 0.08   | -0.02  | 0.12   | -0.01  | 0.13   | -0.14  | 0.01   | -0.03  |
| 0.42                        | -0.18  | 0.08   | 0.04   | 0.00   | 0.04   | -0.15  | 0.05   | -0.07  | 0.00   | -0.20  | 0.00   |
| 0.52                        | -0.49  | -0.62  | -0.08  | 0.03   | 0.19   | -0.08  | 0.05   | 0.04   | 0.00   | 0.01   | -0.01  |
| 0.62                        | 0.27   | 0.26   | 0.75   | 0.59   | 0.23   | 0.16   | -0.26  | -0.25  | -0.26  | -0.03  | 0.09   |
| 0.72                        | -0.17  | -0.37  | -0.23  | 0.04   | 0.33   | 0.78   | 1.46   | 1.72   | 1.53   | 1.45   | 1.27   |
| 0.77                        | -0.36  | -0.06  | 0.39   | -0.14  | 0.43   | 0.26   | 0.72   | 0.98   | 0.96   | 0.88   | 1.24   |
| 0.82                        | -0.62  | -0.12  | -0.49  | -1.02  | -0.46  | -0.28  | -0.33  | -0.03  | 0.43   | 0.61   | 0.92   |
| 0.87                        | -0.02  | -0.29  | -0.10  | 0.07   | -0.16  | -0.12  | 0.29   | 0.37   | 0.38   | 0.34   | 0.75   |
| 0.92                        | -0.10  | -0.34  | -0.11  | -0.22  | -0.20  | 0.09   | -0.06  | 0.10   | 0.14   | 0.31   | 0.43   |
| 0.97                        | 0.05   | -0.35  | -0.04  | -0.03  | -0.11  | -0.26  | -0.18  | 0.33   | 0.38   | 0.41   | 0.41   |
| 1.02                        | -0.17  | -0.49  | -0.19  | -0.09  | -0.15  | -0.14  | 0.11   | 0.13   | 0.25   | 0.39   | 0.54   |
| 1.07                        | -0.51  | -0.54  | -0.56  | -0.03  | -0.03  | 0.00   | -0.28  | 0.03   | 0.17   | 0.33   | 0.55   |
| 1.12                        | 0.30   | -0.18  | 0.02   | 0.10   | -0.14  | -0.04  | 0.16   | 0.29   | 0.33   | 0.51   | 0.40   |
| 1.17                        | -0.29  | -0.53  | -0.07  | -0.23  | -0.32  | -0.41  | -0.02  | 0.12   | 0.20   | 0.19   | 0.22   |
| 1.22                        | -0.12  | -0.01  | -0.29  | -0.17  | 0.07   | 0.09   | 0.17   | 0.15   | 0.38   | 0.56   | 0.43   |
| 1.27                        | -0.32  | -0.53  | -0.42  | -0.51  | -0.28  | -0.23  | -0.18  | 0.10   | 0.01   | 0.05   | 0.37   |
| 1.32                        | -0.70  | -0.78  | -0.33  | -0.25  | -0.12  | -0.18  | 0.00   | 0.07   | 0.27   | 0.39   | 0.56   |
| 1.37                        | -0.30  | 0.12   | -0.11  | -0.12  | -0.14  | 0.26   | 0.21   | 0.30   | 0.17   | 0.35   | 0.54   |
| 1.42                        | -0.24  | -0.49  | -0.44  | 0.00   | 0.30   | 0.08   | 0.15   | 0.49   | 0.42   | 0.47   | 0.47   |
| 1.47                        | 0.13   | -0.37  | 0.14   | 0.16   | -0.20  | 0.14   | 0.43   | 0.35   | 0.32   | 0.40   | 0.60   |
| 1.52                        | -0.22  | -0.67  | -0.06  | -0.26  | -0.25  | -0.45  | 0.05   | 0.29   | 0.18   | 0.00   | 0.50   |
| 1.57                        | -0.74  | -0.11  | -0.10  | -0.33  | -0.12  | 0.01   | -0.20  | 0.16   | 0.02   | 0.10   | 0.22   |
| 1.62                        | -0.38  | -0.45  | -0.45  | 0.11   | -0.34  | -0.35  | 0.17   | 0.20   | 0.16   | 0.23   | 0.27   |
| 1.67                        | -0.30  | -0.21  | -0.53  | -0.20  | -0.21  | 0.18   | -0.01  | 0.12   | 0.23   | 0.41   | 0.42   |

|      |       |       |       |       |       |       |       |       |       |       |       |
|------|-------|-------|-------|-------|-------|-------|-------|-------|-------|-------|-------|
| 1.72 | -0.48 | -0.50 | -0.44 | -0.51 | -0.18 | -0.32 | -0.33 | 0.11  | -0.36 | -0.10 | 0.09  |
| 1.77 | -0.41 | -0.29 | 0.21  | 0.11  | -0.17 | -0.14 | -0.13 | 0.51  | 0.22  | 0.31  | 0.22  |
| 1.82 | -0.14 | -0.50 | -0.16 | 0.05  | 0.00  | -0.17 | 0.25  | 0.16  | 0.20  | 0.25  | 0.19  |
| 1.87 | -0.84 | -0.57 | -0.41 | -0.54 | -0.36 | 0.02  | -0.06 | -0.09 | 0.05  | 0.24  | 0.14  |
| 1.92 | -0.47 | -0.20 | -0.24 | -0.17 | -0.36 | -0.10 | 0.27  | 0.23  | 0.35  | 0.23  | 0.51  |
| 1.97 | 0.03  | -0.32 | -0.07 | 0.10  | -0.05 | 0.25  | 0.00  | 0.11  | 0.05  | 0.23  | 0.45  |
| 2.02 | -0.26 | -0.45 | 0.04  | -0.33 | -0.09 | -0.28 | 0.13  | -0.13 | 0.35  | 0.44  | 0.33  |
| 2.07 | -0.56 | -0.20 | -0.20 | -0.30 | -0.03 | -0.13 | -0.15 | 0.03  | 0.15  | 0.23  | 0.33  |
| 2.12 | -0.31 | -0.57 | 0.08  | -0.20 | 0.03  | -0.08 | 0.19  | 0.26  | 0.27  | 0.39  | 0.41  |
| 2.17 | -0.57 | -0.85 | -0.33 | -0.32 | -0.46 | -0.14 | 0.13  | 0.20  | 0.12  | 0.28  | 0.26  |
| 2.22 | -0.46 | -0.48 | -0.63 | -0.44 | -0.02 | -0.43 | -0.04 | 0.17  | 0.08  | 0.28  | 0.21  |
| 2.27 | -0.70 | -0.57 | -0.36 | -0.05 | -0.36 | -0.26 | -0.24 | -0.14 | 0.05  | -0.05 | 0.17  |
| 2.32 | -0.57 | -0.52 | -0.39 | -0.40 | -0.45 | -0.12 | -0.27 | 0.12  | 0.18  | 0.14  | 0.04  |
| 2.37 | -0.16 | -0.14 | -0.30 | -0.04 | -0.14 | 0.02  | 0.19  | 0.26  | 0.19  | 0.35  | 0.36  |
| 2.42 | -0.61 | -0.56 | -0.32 | -0.55 | -0.13 | -0.07 | 0.03  | 0.12  | 0.03  | -0.02 | 0.20  |
| 2.47 | -0.08 | -0.16 | -0.09 | -0.03 | -0.06 | 0.07  | -0.07 | 0.26  | 0.33  | 0.45  | 0.49  |
| 2.52 | -0.46 | -0.52 | -0.41 | -0.35 | -0.26 | -0.01 | -0.12 | 0.24  | 0.32  | 0.42  | 0.60  |
| 2.57 | -0.34 | -0.18 | -0.22 | -0.24 | 0.18  | -0.26 | 0.07  | 0.19  | 0.22  | 0.15  | 0.34  |
| 2.62 | -0.51 | -0.58 | -0.62 | -0.13 | -0.30 | -0.44 | -0.30 | 0.03  | 0.10  | -0.02 | 0.02  |
| 2.67 | -0.59 | -0.66 | -0.18 | -0.35 | -0.41 | -0.14 | -0.06 | 0.22  | 0.48  | 0.49  | 0.46  |
| 2.72 | -0.68 | -0.56 | -0.36 | -0.28 | -0.22 | -0.30 | -0.19 | 0.20  | 0.03  | 0.21  | 0.20  |
| 2.77 | -0.46 | -0.52 | -0.09 | -0.31 | -0.09 | 0.04  | 0.10  | 0.00  | 0.22  | 0.37  | 0.44  |
| 2.82 | -0.37 | -0.31 | -0.38 | -0.35 | -0.55 | -0.32 | -0.08 | -0.09 | -0.08 | 0.14  | 0.18  |
| 2.87 | -0.31 | -0.31 | -0.16 | -0.63 | 0.03  | 0.06  | 0.12  | 0.25  | 0.05  | 0.19  | 0.29  |
| 2.92 | -0.41 | -0.59 | -0.30 | -0.04 | 0.14  | -0.04 | -0.05 | 0.32  | 0.25  | 0.09  | 0.58  |
| 2.97 | -0.30 | -0.79 | -0.86 | -0.71 | -0.31 | -0.26 | -0.30 | -0.14 | -0.06 | 0.01  | 0.27  |
| 3.02 | 0.08  | -0.31 | 0.27  | 0.10  | -0.02 | 0.03  | 0.09  | 0.16  | 0.21  | 0.24  | 0.25  |
| 3.07 | -0.63 | -0.72 | -0.57 | -0.20 | -0.20 | -0.21 | -0.23 | 0.19  | 0.24  | 0.40  | 0.48  |
| 3.12 | -0.11 | -0.15 | -0.26 | 0.14  | -0.15 | 0.00  | 0.24  | 0.27  | 0.16  | 0.48  | 0.51  |
| 3.17 | -0.66 | -0.91 | -0.46 | -0.38 | -0.41 | -0.38 | -0.20 | -0.19 | 0.04  | -0.04 | 0.36  |
| 3.22 | -0.10 | -0.26 | -0.23 | -0.41 | -0.18 | -0.24 | -0.15 | 0.20  | 0.21  | 0.19  | -0.01 |
| 3.27 | -0.11 | -0.61 | -0.40 | -0.16 | -0.31 | -0.02 | 0.04  | 0.10  | 0.17  | 0.16  | 0.35  |
| 3.32 | -0.41 | -0.32 | -0.30 | 0.06  | -0.12 | 0.06  | 0.15  | 0.45  | 0.30  | 0.71  | 0.54  |
| 3.37 | -0.61 | -0.89 | -0.47 | -0.40 | -0.23 | -0.28 | 0.03  | 0.21  | 0.22  | 0.28  | 0.32  |
| 3.42 | -0.13 | -0.36 | 0.05  | -0.25 | -0.27 | -0.07 | -0.04 | 0.21  | 0.10  | 0.43  | 0.25  |
| 3.47 | -0.66 | -0.61 | -0.44 | -0.31 | -0.20 | -0.09 | -0.16 | 0.38  | 0.19  | 0.15  | 0.33  |
| 3.52 | -0.07 | -0.29 | 0.04  | -0.32 | 0.06  | -0.19 | -0.12 | -0.08 | 0.30  | 0.16  | 0.60  |
| 3.57 | -0.29 | -0.29 | -0.33 | -0.22 | -0.17 | 0.04  | 0.09  | 0.24  | 0.30  | 0.55  | 0.51  |
| 3.62 | -0.38 | -0.40 | -0.24 | -0.42 | -0.18 | -0.15 | -0.01 | 0.10  | 0.23  | 0.26  | 0.27  |
| 3.67 | 0.16  | -0.08 | -0.11 | 0.29  | -0.05 | 0.11  | 0.40  | 0.43  | 0.36  | 0.59  | 0.59  |
| 3.72 | -0.38 | -0.47 | 0.02  | -0.15 | -0.04 | -0.06 | 0.00  | 0.36  | 0.22  | 0.32  | 0.23  |
| 3.92 | -0.61 | -0.71 | -0.37 | -0.49 | -0.57 | -0.29 | 0.12  | 0.14  | 0.02  | 0.26  | 0.24  |
| 4.12 | -0.76 | -0.59 | -0.37 | -0.49 | -0.49 | -0.21 | -0.40 | -0.15 | -0.13 | -0.09 | -0.01 |
| 4.32 | 0.22  | -0.19 | -0.12 | 0.17  | 0.14  | 0.02  | 0.24  | 0.53  | 0.39  | 0.41  | 0.66  |
| 4.52 | -0.50 | -0.50 | -0.32 | -0.38 | -0.29 | -0.27 | -0.21 | 0.05  | 0.12  | 0.34  | 0.11  |
| 4.72 | -0.31 | -0.58 | -0.16 | -0.17 | -0.47 | -0.21 | -0.02 | 0.19  | 0.18  | 0.30  | 0.34  |
| 4.92 | -0.08 | -0.78 | -0.27 | 0.13  | -0.43 | 0.04  | -0.24 | -0.03 | 0.16  | -0.01 | 0.24  |
| 5.12 | -0.51 | -0.19 | -0.20 | -0.12 | -0.17 | -0.10 | 0.01  | 0.35  | 0.14  | 0.39  | 0.53  |
| 5.32 | -0.58 | -0.54 | -0.24 | -0.52 | -0.58 | -0.43 | 0.06  | 0.28  | 0.12  | 0.18  | 0.47  |
| 5.52 | -0.54 | -0.42 | 0.04  | -0.63 | -0.20 | -0.14 | 0.19  | 0.26  | 0.30  | 0.45  | 0.46  |

|       |       |       |       |       |       |       |       |       |       |       |      |
|-------|-------|-------|-------|-------|-------|-------|-------|-------|-------|-------|------|
| 5.72  | -0.06 | -0.61 | -0.43 | -0.10 | -0.21 | -0.24 | -0.01 | 0.13  | 0.14  | 0.27  | 0.51 |
| 5.92  | -0.14 | -0.30 | -0.30 | -0.19 | -0.20 | -0.16 | 0.17  | 0.03  | 0.18  | 0.10  | 0.40 |
| 6.12  | -0.08 | -0.61 | -0.52 | -0.26 | -0.11 | -0.01 | 0.05  | 0.22  | 0.13  | 0.25  | 0.23 |
| 6.32  | -0.31 | -0.34 | -0.28 | 0.00  | -0.12 | 0.14  | 0.04  | 0.29  | 0.22  | 0.30  | 0.47 |
| 6.52  | -0.40 | -0.56 | -0.27 | -0.36 | 0.27  | -0.09 | 0.19  | 0.47  | 0.11  | 0.25  | 0.43 |
| 6.72  | -0.36 | -0.33 | -0.18 | -0.35 | -0.07 | -0.27 | -0.02 | 0.16  | 0.22  | 0.10  | 0.31 |
| 6.92  | -0.33 | -0.53 | -0.19 | -0.25 | 0.07  | -0.48 | -0.13 | 0.10  | 0.25  | 0.34  | 0.59 |
| 7.12  | -0.83 | -0.36 | -0.15 | -0.64 | -0.26 | 0.15  | 0.00  | 0.03  | 0.30  | 0.41  | 0.29 |
| 7.32  | -0.32 | -0.55 | -0.07 | 0.05  | 0.00  | -0.11 | -0.06 | 0.37  | 0.43  | 0.26  | 0.35 |
| 7.52  | -0.45 | -0.28 | -0.43 | -0.42 | -0.27 | -0.11 | 0.09  | 0.24  | 0.13  | 0.16  | 0.22 |
| 7.72  | -0.05 | -0.41 | -0.11 | 0.08  | -0.34 | 0.18  | 0.15  | 0.29  | 0.37  | 0.29  | 0.16 |
| 7.92  | -0.52 | -0.65 | -0.32 | -0.53 | -0.36 | -0.17 | -0.22 | 0.33  | 0.15  | 0.20  | 0.26 |
| 8.12  | -0.17 | -0.28 | 0.13  | -0.11 | -0.14 | 0.06  | 0.27  | 0.16  | 0.04  | 0.42  | 0.40 |
| 8.32  | -0.32 | -0.15 | -0.46 | -0.14 | 0.02  | -0.19 | 0.14  | 0.35  | 0.19  | 0.21  | 0.40 |
| 8.52  | -0.43 | -0.80 | -0.58 | -0.41 | -0.53 | -0.48 | 0.01  | -0.25 | 0.12  | 0.21  | 0.02 |
| 8.72  | -0.78 | -0.29 | -0.30 | -0.71 | -0.25 | -0.25 | -0.15 | -0.08 | -0.02 | 0.05  | 0.05 |
| 8.92  | -0.16 | -0.07 | -0.08 | 0.00  | -0.01 | 0.06  | -0.20 | 0.16  | 0.31  | 0.35  | 0.44 |
| 9.12  | -0.48 | -0.52 | -0.24 | -0.39 | -0.02 | -0.23 | -0.17 | -0.06 | 0.17  | 0.33  | 0.20 |
| 9.32  | 0.32  | -0.19 | -0.09 | -0.18 | -0.06 | 0.18  | 0.18  | 0.37  | 0.48  | 0.35  | 0.48 |
| 9.52  | -0.36 | -0.65 | -0.14 | -0.36 | -0.23 | -0.11 | -0.01 | 0.32  | 0.12  | 0.19  | 0.32 |
| 9.72  | -0.32 | -0.21 | -0.38 | -0.33 | -0.09 | -0.10 | 0.09  | 0.35  | 0.46  | 0.41  | 0.46 |
| 9.92  | -0.06 | -0.44 | -0.45 | -0.21 | 0.21  | -0.01 | -0.07 | 0.41  | 0.36  | 0.36  | 0.19 |
| 10.12 | 0.27  | -0.83 | -0.26 | -0.13 | -0.11 | 0.03  | 0.37  | 0.41  | 0.31  | 0.43  | 0.60 |
| 10.32 | -0.06 | -0.26 | -0.14 | 0.08  | 0.08  | -0.12 | 0.10  | 0.34  | 0.49  | 0.37  | 0.38 |
| 10.52 | -0.55 | -0.62 | -0.41 | -0.33 | -0.24 | -0.17 | -0.05 | 0.19  | 0.03  | 0.24  | 0.32 |
| 10.72 | -0.04 | -0.27 | 0.14  | 0.27  | 0.20  | 0.18  | 0.19  | 0.31  | 0.38  | 0.43  | 0.59 |
| 10.92 | -0.17 | -0.55 | -0.04 | -0.06 | -0.17 | -0.18 | 0.00  | 0.09  | 0.23  | 0.27  | 0.21 |
| 11.12 | -0.59 | -0.29 | -0.16 | -0.37 | -0.33 | -0.20 | -0.17 | 0.04  | 0.16  | 0.27  | 0.23 |
| 11.32 | -0.34 | -0.47 | -0.28 | -0.12 | 0.17  | -0.03 | 0.13  | 0.59  | 0.58  | 0.30  | 0.45 |
| 11.52 | -0.21 | -0.66 | -0.46 | -0.24 | -0.25 | -0.24 | 0.05  | -0.01 | 0.30  | 0.10  | 0.15 |
| 11.72 | -0.09 | -0.50 | 0.14  | 0.05  | -0.34 | -0.14 | -0.12 | 0.11  | 0.25  | 0.22  | 0.16 |
| 11.92 | -0.25 | 0.11  | 0.12  | 0.21  | 0.36  | 0.40  | 0.35  | 0.69  | 0.72  | 0.55  | 0.55 |
| 12.12 | -0.27 | -0.18 | -0.35 | 0.01  | 0.07  | 0.07  | 0.10  | 0.36  | 0.39  | 0.36  | 0.35 |
| 12.32 | 0.15  | -0.08 | 0.29  | -0.29 | 0.27  | 0.20  | 0.15  | 0.40  | 0.35  | 0.42  | 0.23 |
| 12.52 | -0.50 | -0.40 | -0.20 | 0.02  | -0.12 | 0.20  | 0.13  | 0.12  | 0.33  | 0.50  | 0.35 |
| 12.72 | -0.21 | -0.61 | -0.54 | -0.33 | -0.46 | -0.36 | -0.02 | 0.09  | 0.07  | 0.14  | 0.22 |
| 12.92 | -0.12 | -0.31 | -0.07 | 0.06  | -0.14 | -0.28 | 0.04  | 0.37  | 0.41  | 0.43  | 0.43 |
| 13.12 | -0.30 | -0.21 | 0.02  | -0.25 | 0.22  | 0.13  | 0.07  | 0.15  | 0.56  | 0.31  | 0.51 |
| 13.32 | -0.24 | -0.80 | -0.52 | -0.16 | 0.01  | -0.20 | -0.22 | 0.35  | 0.42  | 0.34  | 0.41 |
| 13.52 | -0.39 | -0.65 | -0.39 | -0.55 | -0.28 | -0.13 | -0.25 | -0.10 | -0.13 | -0.01 | 0.17 |
| 13.72 | -0.17 | -0.38 | -0.37 | -0.12 | 0.22  | 0.00  | 0.00  | 0.30  | 0.45  | 0.40  | 0.49 |
| 13.92 | -0.11 | -0.13 | -0.25 | -0.52 | -0.06 | 0.05  | 0.17  | -0.13 | 0.40  | 0.37  | 0.26 |
| 14.00 | -0.04 | -0.21 | 0.03  | -0.05 | 0.22  | 0.02  | 0.13  | 0.17  | 0.20  | 0.16  | 0.34 |
| 14.08 | -0.55 | -0.92 | -0.08 | -0.25 | -0.19 | -0.16 | 0.12  | -0.44 | -0.15 | 0.11  | 0.14 |
| 14.17 | -0.32 | -0.56 | -0.23 | -0.35 | -0.33 | -0.13 | -0.18 | 0.00  | -0.03 | 0.10  | 0.05 |
| 14.27 | -0.16 | -0.28 | -0.25 | -0.17 | 0.01  | 0.15  | 0.06  | -0.01 | 0.24  | 0.26  | 0.28 |
| 14.38 | -0.39 | -0.40 | -0.12 | -0.29 | -0.08 | 0.11  | -0.18 | 0.33  | 0.20  | 0.05  | 0.22 |
| 14.49 | -0.13 | -0.51 | 0.13  | -0.34 | 0.16  | -0.11 | 0.28  | 0.10  | 0.25  | 0.45  | 0.53 |
| 14.61 | -0.41 | -0.29 | -0.45 | -0.07 | -0.05 | -0.13 | 0.01  | -0.03 | 0.11  | 0.18  | 0.53 |
| 14.75 | -0.49 | -0.65 | -0.03 | -0.26 | -0.18 | -0.11 | 0.08  | 0.34  | 0.16  | 0.16  | 0.02 |

|       |       |       |       |       |       |       |       |       |       |       |       |
|-------|-------|-------|-------|-------|-------|-------|-------|-------|-------|-------|-------|
| 14.89 | -0.65 | -0.33 | -0.25 | -0.04 | -0.40 | -0.14 | -0.17 | -0.23 | 0.09  | -0.01 | 0.21  |
| 15.05 | 0.28  | 0.08  | 0.02  | -0.22 | 0.16  | 0.15  | 0.25  | 0.65  | 0.31  | 0.42  | 0.70  |
| 15.21 | 0.11  | -0.49 | -0.33 | -0.08 | 0.00  | 0.13  | 0.08  | 0.33  | 0.22  | 0.35  | 0.38  |
| 15.39 | -0.03 | -0.49 | -0.06 | -0.19 | -0.13 | -0.02 | 0.10  | 0.22  | 0.46  | 0.15  | 0.12  |
| 15.59 | -0.38 | -0.50 | -0.28 | -0.12 | -0.13 | -0.23 | 0.15  | 0.09  | 0.28  | 0.04  | 0.18  |
| 15.80 | -0.55 | -0.68 | -0.36 | -0.02 | -0.38 | -0.24 | 0.01  | 0.22  | -0.17 | -0.04 | 0.22  |
| 16.02 | 0.06  | -0.67 | -0.46 | -0.65 | -0.39 | -0.15 | 0.05  | 0.15  | -0.01 | 0.01  | 0.13  |
| 16.27 | -0.63 | -0.85 | -0.51 | -0.26 | -0.43 | -0.44 | 0.08  | -0.15 | 0.03  | 0.18  | 0.02  |
| 16.53 | -0.69 | -0.69 | -0.32 | -0.25 | -0.40 | -0.09 | 0.19  | 0.26  | 0.16  | 0.35  | 0.25  |
| 16.81 | -0.10 | -0.24 | 0.02  | -0.50 | -0.01 | -0.29 | -0.01 | -0.11 | 0.16  | 0.07  | 0.33  |
| 17.12 | -0.60 | -0.32 | -0.22 | -0.40 | -0.15 | 0.02  | -0.16 | 0.05  | 0.01  | 0.34  | 0.31  |
| 17.45 | -0.48 | -0.33 | -0.50 | -0.44 | -0.22 | -0.27 | -0.14 | -0.16 | -0.19 | -0.02 | -0.08 |
| 17.81 | -0.21 | -0.24 | -0.48 | -0.31 | -0.39 | -0.20 | 0.00  | -0.03 | 0.05  | 0.14  | 0.14  |
| 18.19 | -0.34 | -0.49 | -0.20 | -0.04 | 0.02  | 0.08  | 0.04  | 0.20  | 0.14  | 0.38  | 0.30  |
| 18.60 | -0.26 | -0.27 | 0.18  | -0.49 | 0.18  | -0.28 | 0.04  | 0.10  | 0.13  | 0.13  | 0.24  |
| 19.05 | -0.26 | -0.22 | -0.21 | -0.03 | -0.06 | -0.08 | -0.02 | 0.18  | -0.04 | 0.03  | -0.17 |
| 19.53 | 0.06  | -0.24 | 0.08  | 0.28  | 0.01  | 0.06  | 0.13  | 0.32  | 0.47  | 0.45  | 0.50  |
| 20.05 | -0.18 | -0.11 | 0.47  | -0.28 | 0.00  | -0.19 | 0.23  | 0.66  | 0.42  | 0.53  | 0.21  |
| 20.61 | -0.27 | -0.34 | -0.27 | -0.02 | 0.39  | -0.13 | -0.14 | 0.36  | 0.37  | 0.36  | 0.54  |
| 21.22 | -0.45 | -0.52 | -0.07 | -0.04 | -0.11 | 0.32  | 0.39  | 0.19  | 0.26  | 0.24  | 0.17  |
| 21.87 | -0.29 | -0.28 | -0.37 | -0.13 | -0.05 | -0.23 | 0.18  | 0.10  | 0.28  | 0.30  | 0.36  |
| 22.57 | 0.26  | 0.04  | 0.31  | 0.41  | 0.26  | 0.41  | 0.19  | 0.47  | 0.24  | 0.32  | 0.43  |
| 23.33 | -0.49 | -0.31 | -0.11 | -0.27 | -0.27 | 0.03  | -0.13 | 0.09  | 0.13  | 0.38  | 0.36  |
| 24.15 | -0.12 | -0.28 | -0.29 | 0.04  | -0.01 | 0.12  | 0.16  | 0.32  | 0.28  | 0.53  | 0.36  |
| 25.03 | -0.52 | -0.49 | -0.39 | -0.04 | -0.22 | 0.00  | 0.03  | 0.18  | 0.13  | 0.21  | 0.39  |
| 25.98 | -0.28 | -0.36 | -0.19 | -0.28 | -0.32 | -0.21 | 0.03  | 0.06  | 0.17  | 0.14  | 0.23  |
| 27.01 | -0.25 | -0.12 | -0.10 | 0.01  | -0.04 | 0.08  | -0.11 | 0.29  | 0.28  | 0.41  | 0.42  |
| 28.11 | -0.21 | -0.38 | -0.05 | -0.18 | -0.07 | -0.01 | -0.04 | 0.24  | 0.26  | 0.42  | 0.50  |
| 29.30 | -0.40 | -0.33 | -0.18 | 0.18  | -0.09 | -0.08 | 0.07  | 0.09  | 0.32  | 0.07  | 0.28  |
| 30.59 | -0.22 | 0.08  | -0.25 | 0.28  | 0.07  | 0.03  | 0.29  | 0.42  | 0.32  | 0.57  | 0.35  |
| 31.98 | -0.31 | -0.31 | -0.41 | -0.07 | 0.07  | -0.03 | 0.22  | 0.23  | 0.22  | 0.34  | 0.37  |
| 33.47 | -0.66 | -0.53 | -0.27 | -0.48 | -0.31 | 0.11  | -0.06 | 0.24  | 0.23  | 0.09  | 0.43  |
| 35.09 | -0.16 | -0.24 | 0.05  | -0.08 | -0.03 | 0.20  | 0.27  | 0.44  | 0.49  | 0.54  | 0.40  |
| 36.83 | 0.09  | -0.31 | -0.31 | -0.44 | -0.20 | 0.01  | 0.02  | -0.01 | 0.18  | 0.17  | 0.31  |
| 38.71 | -0.29 | -0.40 | -0.03 | 0.06  | -0.30 | -0.07 | 0.14  | 0.11  | 0.22  | 0.27  | 0.35  |
| 40.73 | -0.21 | -0.26 | -0.26 | 0.03  | -0.11 | 0.22  | -0.33 | 0.22  | 0.40  | 0.25  | 0.20  |
| 42.92 | -0.35 | -0.21 | -0.25 | -0.08 | 0.20  | 0.29  | 0.19  | 0.20  | 0.30  | 0.36  | 0.53  |
| 45.27 | -0.17 | -0.58 | -0.56 | -0.49 | -0.13 | -0.09 | -0.29 | -0.01 | 0.08  | -0.02 | 0.22  |
| 47.81 | -0.08 | -0.18 | -0.26 | -0.21 | 0.09  | 0.13  | 0.01  | 0.37  | 0.17  | 0.19  | 0.27  |
| 50.55 | -0.21 | -0.24 | 0.07  | 0.00  | 0.15  | -0.18 | 0.01  | 0.35  | 0.33  | 0.54  | 0.37  |
| 53.51 | -0.21 | -0.30 | 0.06  | 0.03  | -0.07 | 0.02  | 0.15  | 0.56  | 0.25  | 0.02  | 0.50  |
| 56.69 | -0.63 | -0.56 | -0.21 | -0.18 | -0.52 | -0.16 | 0.13  | 0.18  | 0.19  | 0.48  | 0.20  |
| 60.13 | -0.60 | -0.20 | 0.16  | -0.19 | 0.31  | 0.08  | -0.06 | 0.23  | 0.54  | 0.14  | 0.47  |
| 63.84 | 0.02  | -0.21 | 0.05  | -0.08 | 0.02  | 0.12  | 0.37  | 0.37  | 0.19  | 0.49  | 0.61  |
| 67.83 | -0.40 | -0.33 | -0.17 | 0.03  | 0.13  | 0.24  | 0.04  | 0.40  | 0.43  | 0.33  | 0.47  |
| 72.15 | 0.01  | -0.37 | -0.12 | -0.29 | 0.12  | -0.07 | 0.06  | 0.39  | 0.21  | 0.45  | 0.28  |
| 76.80 | -0.55 | -0.11 | 0.07  | -0.32 | -0.34 | -0.06 | -0.05 | 0.16  | 0.32  | 0.19  | 0.25  |
| 81.81 | -0.55 | -0.58 | 0.10  | -0.34 | -0.57 | 0.05  | 0.03  | 0.03  | 0.14  | 0.22  | 0.28  |
| 87.22 | -0.34 | -0.37 | -0.69 | 0.02  | -0.25 | -0.11 | -0.10 | 0.28  | 0.12  | 0.20  | 0.32  |
| 93.06 | -0.10 | -0.31 | -0.11 | 0.09  | 0.15  | 0.08  | 0.22  | 0.10  | 0.30  | 0.41  | 0.38  |



|         |       |       |       |       |       |       |       |       |       |       |       |
|---------|-------|-------|-------|-------|-------|-------|-------|-------|-------|-------|-------|
| 99.35   | -0.08 | -0.07 | 0.28  | 0.00  | 0.11  | 0.25  | 0.14  | 0.16  | 0.48  | 0.29  | 0.44  |
| 106.13  | -0.40 | -0.15 | -0.02 | -0.17 | -0.10 | -0.05 | 0.44  | 0.47  | 0.50  | 0.73  | 0.67  |
| 113.45  | -0.39 | -0.43 | -0.08 | -0.37 | -0.34 | 0.05  | -0.03 | 0.21  | 0.16  | 0.48  | 0.18  |
| 121.34  | -0.49 | -0.42 | -0.10 | -0.09 | 0.05  | -0.21 | 0.10  | 0.25  | 0.48  | 0.49  | 0.35  |
| 129.86  | 0.13  | -0.34 | -0.11 | 0.04  | 0.06  | 0.06  | 0.28  | 0.36  | 0.46  | 0.42  | 0.59  |
| 139.04  | 0.09  | 0.01  | 0.07  | 0.18  | 0.10  | 0.09  | 0.36  | 0.57  | 0.43  | 0.48  | 0.62  |
| 148.94  | -0.35 | -0.46 | -0.32 | -0.43 | 0.01  | -0.07 | -0.14 | 0.22  | 0.17  | -0.01 | 0.25  |
| 159.62  | -0.15 | -0.15 | 0.00  | 0.17  | 0.16  | 0.11  | 0.10  | 0.51  | 0.24  | 0.53  | 0.44  |
| 171.14  | -0.38 | -0.29 | -0.37 | -0.19 | -0.01 | 0.02  | -0.12 | 0.21  | 0.19  | 0.24  | 0.30  |
| 183.56  | -0.12 | -0.30 | 0.36  | 0.30  | 0.49  | 0.37  | 0.30  | 0.60  | 0.46  | 0.57  | 0.43  |
| 196.96  | -0.59 | -0.40 | -0.60 | -0.37 | -0.11 | -0.10 | -0.05 | 0.04  | 0.21  | 0.33  | 0.52  |
| 211.41  | -0.14 | -0.63 | -0.30 | -0.04 | -0.11 | -0.02 | 0.00  | 0.44  | 0.20  | 0.11  | 0.26  |
| 226.99  | 0.28  | -0.03 | -0.06 | 0.14  | 0.03  | 0.33  | 0.18  | 0.22  | 0.33  | 0.11  | 0.27  |
| 243.80  | 0.03  | -0.36 | -0.25 | -0.32 | -0.10 | -0.11 | 0.05  | 0.25  | 0.17  | 0.28  | 0.34  |
| 261.93  | 0.04  | 0.24  | -0.01 | 0.13  | 0.12  | 0.28  | 0.29  | 0.51  | 0.45  | 0.14  | 0.43  |
| 281.48  | -0.05 | -0.25 | -0.14 | -0.04 | -0.13 | 0.33  | 0.53  | 0.43  | 0.44  | 0.44  | 0.52  |
| 302.56  | 0.11  | -0.56 | -0.19 | 0.04  | 0.04  | 0.26  | -0.01 | 0.35  | 0.13  | 0.25  | 0.21  |
| 325.30  | 0.09  | -0.12 | -0.11 | 0.12  | -0.02 | 0.16  | 0.34  | 0.25  | 0.34  | 0.42  | 0.39  |
| 349.83  | -0.25 | -0.16 | -0.03 | 0.12  | -0.07 | -0.05 | 0.21  | 0.17  | 0.20  | 0.19  | 0.06  |
| 376.28  | -0.07 | -0.42 | -0.13 | -0.10 | 0.26  | 0.28  | 0.23  | 0.30  | 0.26  | 0.23  | 0.31  |
| 404.81  | -0.28 | -0.26 | -0.09 | -0.46 | 0.14  | -0.16 | 0.10  | 0.25  | 0.51  | 0.30  | 0.31  |
| 435.58  | -0.54 | -0.33 | 0.03  | 0.01  | 0.05  | 0.12  | 0.48  | 0.29  | 0.42  | 0.45  | 0.43  |
| 468.76  | -0.51 | -0.44 | -0.12 | -0.24 | -0.03 | -0.04 | 0.02  | 0.10  | 0.35  | 0.01  | 0.22  |
| 504.55  | -0.40 | -0.32 | -0.13 | 0.06  | -0.27 | -0.10 | -0.05 | 0.42  | 0.19  | 0.07  | 0.31  |
| 543.15  | -0.46 | 0.06  | 0.22  | -0.06 | -0.01 | 0.06  | 0.17  | 0.19  | 0.40  | 0.09  | 0.34  |
| 584.78  | 0.07  | 0.23  | 0.17  | 0.00  | 0.08  | -0.07 | 0.11  | 0.27  | 0.31  | 0.38  | 0.40  |
| 629.68  | -0.24 | -0.25 | -0.02 | -0.36 | -0.08 | 0.13  | 0.17  | 0.09  | 0.02  | 0.14  | 0.25  |
| 678.10  | -0.05 | -0.02 | 0.42  | 0.10  | 0.15  | 0.17  | 0.14  | 0.22  | 0.45  | 0.28  | 0.56  |
| 730.33  | -0.16 | 0.16  | 0.16  | 0.00  | 0.05  | 0.06  | 0.11  | 0.37  | 0.64  | 0.46  | 0.66  |
| 786.65  | -0.51 | -0.53 | -0.14 | 0.05  | -0.05 | -0.20 | -0.32 | 0.18  | 0.35  | 0.15  | 0.24  |
| 847.40  | 0.03  | -0.40 | -0.02 | -0.40 | -0.30 | 0.03  | -0.13 | 0.20  | 0.17  | 0.12  | 0.10  |
| 912.92  | -0.05 | -0.24 | -0.03 | -0.29 | 0.20  | -0.33 | -0.04 | 0.38  | 0.09  | 0.18  | 0.46  |
| 983.58  | -0.57 | -0.37 | 0.07  | -0.15 | 0.05  | -0.04 | 0.05  | 0.22  | 0.23  | 0.34  | 0.30  |
| 1059.78 | -0.06 | -0.39 | -0.60 | -0.35 | -0.15 | -0.29 | -0.03 | 0.34  | 0.32  | 0.49  | 0.46  |
| 1141.98 | -0.07 | -0.22 | 0.04  | 0.23  | 0.22  | -0.01 | 0.19  | 0.32  | 0.41  | 0.34  | 0.52  |
| 1230.62 | 0.10  | 0.11  | -0.23 | 0.28  | 0.06  | 0.30  | 0.33  | 0.33  | 0.28  | 0.34  | 0.42  |
| 1326.23 | -0.16 | 0.66  | 0.25  | 0.07  | 0.27  | 0.41  | 0.32  | 0.65  | 0.56  | 0.30  | 0.55  |
| 1429.34 | -0.34 | -0.46 | -0.32 | -0.41 | -0.62 | -0.41 | -0.23 | -0.22 | 0.07  | -0.08 | 0.27  |
| 1540.54 | -0.17 | -0.36 | -0.26 | 0.25  | -0.23 | -0.15 | 0.08  | 0.31  | 0.03  | 0.42  | 0.52  |
| 1660.48 | 0.09  | -0.25 | -0.33 | 0.20  | 0.09  | 0.13  | 0.18  | 0.32  | 0.40  | 0.49  | 0.57  |
| 1789.83 | 0.11  | 0.01  | -0.02 | -0.27 | 0.05  | 0.01  | 0.05  | 0.32  | 0.28  | 0.37  | 0.42  |
| 1929.34 | -0.14 | 0.07  | -0.13 | 0.07  | 0.29  | -0.01 | 0.27  | 0.31  | 0.41  | 0.39  | 0.33  |
| 2079.80 | -0.22 | -0.41 | -0.31 | -0.40 | 0.04  | -0.13 | 0.14  | 0.02  | 0.12  | 0.29  | 0.16  |
| 2242.08 | -0.22 | -0.17 | -0.26 | -0.40 | -0.01 | -0.11 | -0.11 | 0.13  | 0.28  | 0.19  | 0.24  |
| 2417.10 | -0.54 | -0.39 | -0.30 | -0.33 | -0.28 | -0.08 | -0.22 | 0.21  | -0.09 | 0.07  | -0.03 |
| 2605.85 | -0.05 | -0.20 | -0.10 | 0.00  | -0.01 | -0.18 | -0.02 | 0.17  | 0.22  | -0.03 | 0.14  |
| 2809.43 | -0.15 | -0.24 | -0.01 | -0.03 | 0.18  | 0.20  | 0.04  | 0.29  | 0.35  | 0.29  | 0.44  |
| 3028.99 | -0.45 | -0.17 | 0.07  | -0.03 | -0.10 | 0.18  | 0.32  | 0.42  | 0.51  | 0.38  | 0.53  |
| 3265.79 | -0.22 | -0.18 | -0.16 | -0.33 | -0.11 | 0.23  | -0.11 | -0.01 | 0.28  | 0.36  | 0.18  |
| 3521.18 | -0.22 | -0.14 | 0.00  | 0.05  | 0.31  | 0.22  | 0.07  | 0.27  | 0.38  | 0.57  | 0.21  |









|         |      |      |      |      |      |      |      |      |      |      |      |
|---------|------|------|------|------|------|------|------|------|------|------|------|
| 243.80  | 0.00 | 0.00 | 0.00 | 0.00 | 0.00 | 0.00 | 0.00 | 0.00 | 0.00 | 0.00 | 0.00 |
| 261.93  | 0.00 | 0.00 | 0.00 | 0.00 | 0.00 | 0.00 | 0.00 | 0.00 | 0.00 | 0.00 | 0.00 |
| 281.48  | 0.00 | 0.00 | 0.00 | 0.00 | 0.00 | 0.00 | 0.00 | 0.00 | 0.00 | 0.00 | 0.00 |
| 302.56  | 0.00 | 0.00 | 0.00 | 0.00 | 0.00 | 0.00 | 0.00 | 0.00 | 0.00 | 0.00 | 0.00 |
| 325.30  | 0.00 | 0.00 | 0.00 | 0.00 | 0.00 | 0.00 | 0.00 | 0.00 | 0.00 | 0.00 | 0.00 |
| 349.83  | 0.00 | 0.00 | 0.00 | 0.00 | 0.00 | 0.00 | 0.00 | 0.00 | 0.00 | 0.00 | 0.00 |
| 376.28  | 0.00 | 0.00 | 0.00 | 0.00 | 0.00 | 0.00 | 0.00 | 0.00 | 0.00 | 0.00 | 0.00 |
| 404.81  | 0.00 | 0.00 | 0.00 | 0.00 | 0.00 | 0.00 | 0.00 | 0.00 | 0.00 | 0.00 | 0.00 |
| 435.58  | 0.00 | 0.00 | 0.00 | 0.00 | 0.00 | 0.00 | 0.00 | 0.00 | 0.00 | 0.00 | 0.00 |
| 468.76  | 0.00 | 0.00 | 0.00 | 0.00 | 0.00 | 0.00 | 0.00 | 0.00 | 0.00 | 0.00 | 0.00 |
| 504.55  | 0.00 | 0.00 | 0.00 | 0.00 | 0.00 | 0.00 | 0.00 | 0.00 | 0.00 | 0.00 | 0.00 |
| 543.15  | 0.00 | 0.00 | 0.00 | 0.00 | 0.00 | 0.00 | 0.00 | 0.00 | 0.00 | 0.00 | 0.00 |
| 584.78  | 0.00 | 0.00 | 0.00 | 0.00 | 0.00 | 0.00 | 0.00 | 0.00 | 0.00 | 0.00 | 0.00 |
| 629.68  | 0.00 | 0.00 | 0.00 | 0.00 | 0.00 | 0.00 | 0.00 | 0.00 | 0.00 | 0.00 | 0.00 |
| 678.10  | 0.00 | 0.00 | 0.00 | 0.00 | 0.00 | 0.00 | 0.00 | 0.00 | 0.00 | 0.00 | 0.00 |
| 730.33  | 0.00 | 0.00 | 0.00 | 0.00 | 0.00 | 0.00 | 0.00 | 0.00 | 0.00 | 0.00 | 0.00 |
| 786.65  | 0.00 | 0.00 | 0.00 | 0.00 | 0.00 | 0.00 | 0.00 | 0.00 | 0.00 | 0.00 | 0.00 |
| 847.40  | 0.00 | 0.00 | 0.00 | 0.00 | 0.00 | 0.00 | 0.00 | 0.00 | 0.00 | 0.00 | 0.00 |
| 912.92  | 0.00 | 0.00 | 0.00 | 0.00 | 0.00 | 0.00 | 0.00 | 0.00 | 0.00 | 0.00 | 0.00 |
| 983.58  | 0.00 | 0.00 | 0.00 | 0.00 | 0.00 | 0.00 | 0.00 | 0.00 | 0.00 | 0.00 | 0.00 |
| 1059.78 | 0.00 | 0.00 | 0.00 | 0.00 | 0.00 | 0.00 | 0.00 | 0.00 | 0.00 | 0.00 | 0.00 |
| 1141.98 | 0.00 | 0.00 | 0.00 | 0.00 | 0.00 | 0.00 | 0.00 | 0.00 | 0.00 | 0.00 | 0.00 |
| 1230.62 | 0.00 | 0.00 | 0.00 | 0.00 | 0.00 | 0.00 | 0.00 | 0.00 | 0.00 | 0.00 | 0.00 |
| 1326.23 | 0.00 | 0.00 | 0.00 | 0.00 | 0.00 | 0.00 | 0.00 | 0.00 | 0.00 | 0.00 | 0.00 |
| 1429.34 | 0.00 | 0.00 | 0.00 | 0.00 | 0.00 | 0.00 | 0.00 | 0.00 | 0.00 | 0.00 | 0.00 |
| 1540.54 | 0.00 | 0.00 | 0.00 | 0.00 | 0.00 | 0.00 | 0.00 | 0.00 | 0.00 | 0.00 | 0.00 |
| 1660.48 | 0.00 | 0.00 | 0.00 | 0.00 | 0.00 | 0.00 | 0.00 | 0.00 | 0.00 | 0.00 | 0.00 |
| 1789.83 | 0.00 | 0.00 | 0.00 | 0.00 | 0.00 | 0.00 | 0.00 | 0.00 | 0.00 | 0.00 | 0.00 |
| 1929.34 | 0.00 | 0.00 | 0.00 | 0.00 | 0.00 | 0.00 | 0.00 | 0.00 | 0.00 | 0.00 | 0.00 |
| 2079.80 | 0.00 | 0.00 | 0.00 | 0.00 | 0.00 | 0.00 | 0.00 | 0.00 | 0.00 | 0.00 | 0.00 |
| 2242.08 | 0.00 | 0.00 | 0.00 | 0.00 | 0.00 | 0.00 | 0.00 | 0.00 | 0.00 | 0.00 | 0.00 |
| 2417.10 | 0.00 | 0.00 | 0.00 | 0.00 | 0.00 | 0.00 | 0.00 | 0.00 | 0.00 | 0.00 | 0.00 |
| 2605.85 | 0.00 | 0.00 | 0.00 | 0.00 | 0.00 | 0.00 | 0.00 | 0.00 | 0.00 | 0.00 | 0.00 |
| 2809.43 | 0.00 | 0.00 | 0.00 | 0.00 | 0.00 | 0.00 | 0.00 | 0.00 | 0.00 | 0.00 | 0.00 |
| 3028.99 | 0.00 | 0.00 | 0.00 | 0.00 | 0.00 | 0.00 | 0.00 | 0.00 | 0.00 | 0.00 | 0.00 |
| 3265.79 | 0.00 | 0.00 | 0.00 | 0.00 | 0.00 | 0.00 | 0.00 | 0.00 | 0.00 | 0.00 | 0.00 |
| 3521.18 | 0.00 | 0.00 | 0.00 | 0.00 | 0.00 | 0.00 | 0.00 | 0.00 | 0.00 | 0.00 | 0.00 |
| 3796.62 | 0.00 | 0.00 | 0.00 | 0.00 | 0.00 | 0.00 | 0.00 | 0.00 | 0.00 | 0.00 | 0.00 |

| Wavelength (nm) \ Time (ps) | 367.19 | 368.59 | 370.00 | 371.41 | 372.82 | 374.23 | 375.64 | 377.05 | 378.45 | 379.86 | 381.27 |
|-----------------------------|--------|--------|--------|--------|--------|--------|--------|--------|--------|--------|--------|
| -3.28                       | 0.14   | 0.00   | -0.02  | 0.24   | 0.14   | 0.11   | 0.15   | 0.08   | 0.13   | -0.06  | -0.20  |
| -2.78                       | -0.05  | 0.07   | 0.16   | -0.05  | -0.04  | 0.10   | 0.09   | 0.04   | -0.08  | -0.08  | -0.01  |
| -2.28                       | 0.03   | 0.05   | -0.05  | -0.07  | -0.09  | -0.25  | 0.01   | -0.04  | -0.07  | -0.07  | 0.05   |
| -1.78                       | -0.04  | -0.01  | 0.10   | 0.08   | 0.01   | 0.15   | 0.06   | 0.09   | 0.24   | 0.29   | 0.14   |
| -1.28                       | 0.14   | -0.04  | -0.09  | 0.02   | -0.03  | -0.21  | -0.23  | -0.02  | -0.12  | 0.05   | 0.07   |
| -0.78                       | -0.15  | -0.04  | -0.02  | -0.06  | 0.10   | 0.03   | -0.09  | -0.09  | -0.08  | -0.14  | -0.07  |
| -0.28                       | 0.02   | 0.08   | -0.04  | -0.07  | -0.06  | 0.00   | -0.07  | -0.02  | -0.07  | 0.03   | -0.02  |
| 0.22                        | 0.02   | 0.13   | -0.06  | -0.06  | 0.07   | 0.05   | 0.02   | -0.06  | 0.00   | 0.09   | 0.03   |

|      |       |       |       |       |       |       |       |       |       |       |       |
|------|-------|-------|-------|-------|-------|-------|-------|-------|-------|-------|-------|
| 0.32 | -0.12 | -0.10 | 0.07  | -0.05 | 0.06  | 0.04  | 0.04  | -0.04 | 0.06  | -0.08 | 0.01  |
| 0.42 | 0.01  | -0.15 | -0.04 | 0.02  | -0.16 | -0.01 | 0.03  | 0.07  | -0.02 | -0.02 | -0.01 |
| 0.52 | 0.02  | 0.01  | 0.12  | 0.09  | 0.06  | 0.04  | 0.12  | 0.06  | 0.13  | -0.03 | 0.12  |
| 0.62 | 0.34  | 0.11  | 0.08  | 0.13  | 0.07  | 0.08  | 0.01  | 0.01  | 0.15  | 0.16  | 0.26  |
| 0.72 | -0.01 | -0.11 | 0.03  | -0.06 | -0.08 | 0.01  | -0.08 | -0.13 | -0.01 | -0.03 | -0.08 |
| 0.77 | -0.20 | -0.19 | -0.07 | -0.14 | 0.07  | -0.15 | -0.05 | -0.03 | -0.03 | 0.03  | -0.06 |
| 0.82 | 1.22  | 0.92  | 0.70  | 0.39  | 0.12  | -0.25 | -0.17 | -0.09 | -0.18 | -0.17 | -0.08 |
| 0.87 | 3.51  | 3.74  | 3.40  | 3.07  | 2.47  | 2.06  | 1.37  | 0.99  | 0.61  | 0.33  | 0.19  |
| 0.92 | 3.05  | 3.25  | 3.46  | 3.45  | 3.61  | 3.20  | 3.22  | 3.22  | 3.00  | 2.58  | 2.40  |
| 0.97 | 2.84  | 3.26  | 3.60  | 3.99  | 4.13  | 4.08  | 3.97  | 3.78  | 3.66  | 3.64  | 3.67  |
| 1.02 | 2.19  | 2.40  | 2.79  | 2.81  | 2.93  | 3.22  | 3.47  | 3.53  | 4.18  | 4.53  | 5.09  |
| 1.07 | 2.06  | 2.09  | 2.50  | 2.33  | 2.69  | 2.89  | 2.95  | 3.26  | 3.37  | 3.63  | 4.02  |
| 1.12 | 2.35  | 2.17  | 2.61  | 2.68  | 2.89  | 2.98  | 3.23  | 3.25  | 3.61  | 3.77  | 3.93  |
| 1.17 | 2.09  | 2.20  | 2.26  | 2.34  | 2.50  | 2.83  | 2.70  | 2.91  | 3.12  | 3.17  | 3.22  |
| 1.22 | 2.04  | 2.26  | 2.37  | 2.57  | 2.50  | 2.72  | 2.80  | 3.09  | 3.16  | 3.19  | 3.46  |
| 1.27 | 1.95  | 2.20  | 2.18  | 2.36  | 2.38  | 2.56  | 2.62  | 2.82  | 2.92  | 3.12  | 3.28  |
| 1.32 | 2.17  | 2.07  | 2.29  | 2.31  | 2.60  | 2.51  | 2.62  | 2.77  | 2.99  | 2.98  | 3.26  |
| 1.37 | 1.78  | 1.90  | 2.17  | 2.23  | 2.41  | 2.30  | 2.46  | 2.72  | 2.81  | 3.00  | 2.99  |
| 1.42 | 1.71  | 1.99  | 2.20  | 2.33  | 2.43  | 2.65  | 2.44  | 2.80  | 2.73  | 2.73  | 3.01  |
| 1.47 | 1.92  | 2.00  | 2.15  | 2.06  | 2.19  | 2.40  | 2.36  | 2.48  | 2.60  | 2.82  | 3.01  |
| 1.52 | 1.63  | 1.79  | 2.09  | 1.94  | 2.05  | 2.17  | 2.28  | 2.25  | 2.60  | 2.62  | 2.77  |
| 1.57 | 1.67  | 1.77  | 1.81  | 2.11  | 2.15  | 2.27  | 2.27  | 2.39  | 2.48  | 2.68  | 2.66  |
| 1.62 | 1.73  | 1.77  | 1.89  | 2.00  | 2.15  | 2.06  | 2.27  | 2.27  | 2.37  | 2.59  | 2.66  |
| 1.67 | 1.75  | 1.77  | 2.13  | 2.00  | 2.25  | 2.21  | 2.34  | 2.34  | 2.66  | 2.78  | 2.88  |
| 1.72 | 1.47  | 1.65  | 1.72  | 1.87  | 1.78  | 2.03  | 2.14  | 2.17  | 2.13  | 2.44  | 2.66  |
| 1.77 | 1.58  | 1.88  | 1.87  | 2.03  | 1.94  | 2.01  | 2.28  | 2.34  | 2.42  | 2.35  | 2.58  |
| 1.82 | 1.61  | 1.55  | 1.89  | 1.73  | 2.03  | 1.95  | 2.32  | 2.37  | 2.44  | 2.25  | 2.57  |
| 1.87 | 1.43  | 1.45  | 1.72  | 1.83  | 1.87  | 1.94  | 2.00  | 2.15  | 2.33  | 2.19  | 2.43  |
| 1.92 | 1.75  | 1.82  | 1.81  | 1.95  | 1.94  | 2.09  | 2.29  | 2.35  | 2.27  | 2.55  | 2.65  |
| 1.97 | 1.62  | 1.61  | 1.73  | 1.76  | 1.97  | 2.13  | 2.16  | 2.28  | 2.31  | 2.41  | 2.56  |
| 2.02 | 1.56  | 1.65  | 1.71  | 1.82  | 2.11  | 2.14  | 2.08  | 2.25  | 2.19  | 2.41  | 2.54  |
| 2.07 | 1.45  | 1.51  | 1.84  | 1.60  | 1.86  | 1.91  | 1.94  | 2.11  | 2.24  | 2.27  | 2.53  |
| 2.12 | 1.65  | 1.81  | 2.09  | 1.86  | 1.88  | 2.10  | 2.18  | 2.34  | 2.56  | 2.58  | 2.63  |
| 2.17 | 1.40  | 1.59  | 1.95  | 1.90  | 1.90  | 1.99  | 2.08  | 2.29  | 2.33  | 2.28  | 2.50  |
| 2.22 | 1.48  | 1.57  | 1.87  | 1.53  | 1.85  | 2.06  | 2.05  | 1.98  | 2.13  | 2.17  | 2.40  |
| 2.27 | 1.24  | 1.29  | 1.48  | 1.69  | 1.77  | 1.76  | 2.00  | 2.05  | 2.20  | 2.21  | 2.35  |
| 2.32 | 1.28  | 1.51  | 1.45  | 1.59  | 1.65  | 1.68  | 1.82  | 2.06  | 2.06  | 2.10  | 2.23  |
| 2.37 | 1.53  | 1.70  | 1.74  | 1.85  | 2.00  | 1.96  | 2.03  | 2.27  | 2.30  | 2.25  | 2.40  |
| 2.42 | 1.45  | 1.61  | 1.65  | 1.93  | 1.85  | 1.89  | 1.98  | 2.24  | 2.23  | 2.27  | 2.41  |
| 2.47 | 1.49  | 1.49  | 1.85  | 1.80  | 1.85  | 1.96  | 1.81  | 2.06  | 2.23  | 2.09  | 2.46  |
| 2.52 | 1.60  | 1.43  | 1.77  | 1.80  | 1.81  | 1.95  | 2.04  | 2.12  | 2.14  | 2.11  | 2.51  |
| 2.57 | 1.47  | 1.61  | 1.75  | 1.86  | 1.97  | 1.72  | 1.92  | 2.01  | 2.06  | 2.27  | 2.38  |
| 2.62 | 1.35  | 1.37  | 1.50  | 1.62  | 1.76  | 1.78  | 1.75  | 1.87  | 1.92  | 2.14  | 2.21  |
| 2.67 | 1.48  | 1.70  | 1.73  | 1.85  | 1.95  | 1.79  | 1.89  | 2.02  | 2.14  | 2.22  | 2.31  |
| 2.72 | 1.60  | 1.64  | 1.69  | 1.71  | 1.90  | 2.07  | 1.98  | 2.12  | 2.10  | 2.21  | 2.40  |
| 2.77 | 1.40  | 1.65  | 1.81  | 1.77  | 1.88  | 1.97  | 2.11  | 2.36  | 2.22  | 2.27  | 2.57  |
| 2.82 | 1.34  | 1.46  | 1.71  | 1.73  | 1.69  | 1.80  | 1.82  | 2.03  | 1.99  | 2.17  | 2.37  |
| 2.87 | 1.79  | 1.72  | 1.69  | 1.73  | 1.86  | 1.74  | 1.89  | 1.88  | 2.12  | 2.24  | 2.18  |
| 2.92 | 1.52  | 1.69  | 1.71  | 1.72  | 1.76  | 1.81  | 1.95  | 2.11  | 2.06  | 2.08  | 2.16  |
| 2.97 | 1.58  | 1.34  | 1.55  | 1.54  | 1.92  | 1.73  | 1.86  | 1.96  | 2.07  | 2.12  | 2.26  |

|       |      |      |      |      |      |      |      |      |      |      |      |
|-------|------|------|------|------|------|------|------|------|------|------|------|
| 3.02  | 1.59 | 1.65 | 1.88 | 1.89 | 1.97 | 1.84 | 2.02 | 2.19 | 2.22 | 2.31 | 2.55 |
| 3.07  | 1.50 | 1.69 | 1.79 | 1.82 | 1.82 | 1.94 | 2.06 | 2.13 | 2.16 | 2.15 | 2.31 |
| 3.12  | 1.75 | 1.68 | 1.81 | 1.87 | 1.87 | 1.78 | 2.12 | 2.00 | 2.16 | 2.23 | 2.36 |
| 3.17  | 1.25 | 1.42 | 1.51 | 1.76 | 1.64 | 1.87 | 1.87 | 1.96 | 1.95 | 2.20 | 2.28 |
| 3.22  | 1.45 | 1.48 | 1.72 | 1.60 | 1.66 | 1.88 | 1.84 | 1.84 | 2.09 | 2.00 | 2.27 |
| 3.27  | 1.48 | 1.55 | 1.63 | 1.71 | 1.84 | 1.83 | 1.94 | 1.97 | 2.10 | 2.25 | 2.40 |
| 3.32  | 1.59 | 1.69 | 1.91 | 2.02 | 1.89 | 2.01 | 2.01 | 2.12 | 2.34 | 2.46 | 2.57 |
| 3.37  | 1.39 | 1.66 | 1.81 | 1.87 | 1.86 | 1.94 | 1.86 | 2.04 | 2.24 | 2.13 | 2.11 |
| 3.42  | 1.59 | 1.73 | 1.79 | 1.77 | 1.80 | 2.08 | 2.01 | 1.96 | 2.20 | 2.46 | 2.40 |
| 3.47  | 1.42 | 1.55 | 1.76 | 1.70 | 1.79 | 1.77 | 1.87 | 1.96 | 1.99 | 2.27 | 2.33 |
| 3.52  | 1.42 | 1.66 | 1.76 | 1.81 | 1.77 | 1.81 | 1.98 | 1.93 | 2.20 | 2.08 | 2.27 |
| 3.57  | 1.43 | 1.52 | 1.78 | 1.79 | 1.84 | 1.84 | 1.91 | 1.80 | 2.20 | 2.10 | 2.08 |
| 3.62  | 1.50 | 1.58 | 1.64 | 1.51 | 1.74 | 1.88 | 1.86 | 1.89 | 1.91 | 2.18 | 2.23 |
| 3.67  | 1.60 | 1.75 | 1.81 | 1.71 | 1.98 | 1.87 | 2.18 | 2.01 | 2.10 | 2.21 | 2.59 |
| 3.72  | 1.44 | 1.61 | 1.59 | 1.59 | 1.70 | 1.77 | 1.83 | 1.82 | 2.01 | 2.04 | 2.11 |
| 3.92  | 1.35 | 1.55 | 1.51 | 1.62 | 2.00 | 1.86 | 1.64 | 2.08 | 2.24 | 2.29 | 2.28 |
| 4.12  | 1.45 | 1.38 | 1.58 | 1.77 | 1.57 | 1.77 | 1.87 | 1.96 | 2.00 | 2.02 | 2.27 |
| 4.32  | 1.46 | 1.54 | 1.54 | 1.73 | 1.73 | 1.87 | 1.79 | 2.12 | 2.03 | 2.06 | 2.18 |
| 4.52  | 1.36 | 1.51 | 1.68 | 1.70 | 1.66 | 1.83 | 1.99 | 2.01 | 2.06 | 2.19 | 2.29 |
| 4.72  | 1.54 | 1.69 | 1.74 | 1.69 | 1.90 | 1.76 | 1.93 | 1.90 | 2.06 | 2.02 | 2.36 |
| 4.92  | 1.45 | 1.41 | 1.68 | 1.51 | 1.78 | 1.67 | 1.67 | 1.96 | 1.95 | 2.20 | 2.28 |
| 5.12  | 1.63 | 1.57 | 1.66 | 1.73 | 1.70 | 2.01 | 1.83 | 1.75 | 2.10 | 2.07 | 2.32 |
| 5.32  | 1.35 | 1.55 | 1.64 | 1.70 | 1.75 | 1.97 | 1.85 | 2.06 | 2.12 | 2.12 | 2.21 |
| 5.52  | 1.45 | 1.68 | 1.61 | 1.68 | 1.99 | 1.77 | 1.96 | 1.80 | 2.13 | 2.25 | 2.41 |
| 5.72  | 1.49 | 1.62 | 1.82 | 1.63 | 1.89 | 1.95 | 1.99 | 1.97 | 2.08 | 2.14 | 2.24 |
| 5.92  | 1.51 | 1.54 | 1.58 | 1.70 | 1.65 | 1.81 | 1.93 | 1.83 | 2.00 | 2.22 | 2.17 |
| 6.12  | 1.40 | 1.54 | 1.51 | 1.60 | 1.65 | 1.61 | 1.87 | 2.00 | 2.00 | 2.04 | 2.07 |
| 6.32  | 1.56 | 1.34 | 1.65 | 1.58 | 1.68 | 1.72 | 1.74 | 1.87 | 2.07 | 1.82 | 2.13 |
| 6.52  | 1.27 | 1.67 | 1.67 | 1.71 | 1.66 | 1.87 | 2.09 | 2.03 | 2.15 | 2.05 | 2.17 |
| 6.72  | 1.44 | 1.56 | 1.72 | 1.55 | 1.80 | 1.94 | 1.99 | 1.92 | 2.18 | 2.21 | 2.30 |
| 6.92  | 1.65 | 1.35 | 1.78 | 1.66 | 1.60 | 1.74 | 1.94 | 1.92 | 1.86 | 2.16 | 2.18 |
| 7.12  | 1.41 | 1.31 | 1.37 | 1.49 | 1.66 | 1.74 | 1.84 | 1.94 | 2.06 | 2.10 | 2.31 |
| 7.32  | 1.41 | 1.61 | 1.66 | 1.65 | 1.71 | 1.70 | 1.96 | 1.82 | 1.98 | 1.93 | 2.18 |
| 7.52  | 1.30 | 1.64 | 1.60 | 1.68 | 1.72 | 1.64 | 1.80 | 1.88 | 1.99 | 2.14 | 2.30 |
| 7.72  | 1.28 | 1.44 | 1.41 | 1.63 | 1.73 | 1.75 | 1.79 | 1.87 | 2.01 | 2.12 | 2.37 |
| 7.92  | 1.35 | 1.59 | 1.75 | 1.56 | 1.75 | 1.85 | 1.76 | 1.89 | 1.85 | 2.00 | 2.13 |
| 8.12  | 1.39 | 1.31 | 1.43 | 1.77 | 1.91 | 1.68 | 1.70 | 1.89 | 1.82 | 2.01 | 2.20 |
| 8.32  | 1.47 | 1.32 | 1.38 | 1.55 | 1.74 | 1.75 | 1.79 | 1.78 | 2.05 | 2.03 | 2.00 |
| 8.52  | 1.26 | 1.52 | 1.31 | 1.51 | 1.47 | 1.54 | 1.59 | 1.67 | 1.63 | 1.78 | 1.93 |
| 8.72  | 1.37 | 1.35 | 1.45 | 1.48 | 1.68 | 1.79 | 1.68 | 1.88 | 1.90 | 1.98 | 2.04 |
| 8.92  | 1.18 | 1.57 | 1.56 | 1.69 | 1.51 | 1.81 | 1.67 | 1.80 | 1.92 | 1.97 | 1.98 |
| 9.12  | 1.46 | 1.49 | 1.52 | 1.65 | 1.60 | 1.81 | 1.84 | 1.94 | 2.02 | 1.99 | 2.02 |
| 9.32  | 1.46 | 1.37 | 1.55 | 1.73 | 1.85 | 1.74 | 1.87 | 2.02 | 1.82 | 2.01 | 2.14 |
| 9.52  | 1.31 | 1.34 | 1.42 | 1.55 | 1.51 | 1.79 | 1.63 | 1.83 | 1.93 | 1.86 | 2.08 |
| 9.72  | 1.34 | 1.29 | 1.70 | 1.58 | 1.53 | 1.69 | 1.69 | 1.83 | 1.83 | 1.93 | 2.08 |
| 9.92  | 1.36 | 1.52 | 1.77 | 1.71 | 1.89 | 1.90 | 1.90 | 2.01 | 1.95 | 2.11 | 2.28 |
| 10.12 | 1.48 | 1.65 | 1.88 | 1.64 | 1.83 | 2.04 | 2.11 | 2.20 | 2.10 | 2.24 | 2.25 |
| 10.32 | 1.21 | 1.54 | 1.61 | 1.74 | 1.72 | 1.75 | 1.75 | 2.02 | 2.14 | 1.94 | 2.13 |
| 10.52 | 1.45 | 1.35 | 1.49 | 1.64 | 1.67 | 1.68 | 1.89 | 1.86 | 2.09 | 2.00 | 2.30 |
| 10.72 | 1.60 | 1.60 | 1.47 | 1.70 | 1.78 | 1.66 | 1.63 | 1.96 | 1.93 | 2.08 | 2.07 |



|       |      |      |      |      |      |      |      |      |      |      |      |
|-------|------|------|------|------|------|------|------|------|------|------|------|
| 10.92 | 1.49 | 1.51 | 1.57 | 1.46 | 1.51 | 1.63 | 1.64 | 1.64 | 1.83 | 2.03 | 1.86 |
| 11.12 | 1.16 | 1.34 | 1.51 | 1.50 | 1.54 | 1.69 | 1.57 | 1.72 | 1.76 | 1.93 | 2.13 |
| 11.32 | 1.53 | 1.56 | 1.75 | 1.70 | 1.77 | 1.63 | 1.85 | 1.92 | 2.28 | 2.20 | 2.23 |
| 11.52 | 1.27 | 1.31 | 1.51 | 1.49 | 1.38 | 1.55 | 1.55 | 1.78 | 1.91 | 2.03 | 1.97 |
| 11.72 | 1.41 | 1.55 | 1.50 | 1.74 | 1.77 | 1.63 | 1.75 | 1.96 | 1.99 | 2.03 | 2.07 |
| 11.92 | 1.44 | 1.51 | 1.61 | 1.76 | 1.70 | 1.65 | 1.74 | 1.84 | 1.90 | 1.83 | 2.06 |
| 12.12 | 1.39 | 1.44 | 1.55 | 1.49 | 1.44 | 1.72 | 1.80 | 1.85 | 1.62 | 1.96 | 2.07 |
| 12.32 | 1.08 | 1.42 | 1.47 | 1.51 | 1.63 | 1.70 | 1.77 | 1.91 | 2.04 | 2.24 | 2.34 |
| 12.52 | 1.19 | 1.36 | 1.73 | 1.61 | 1.68 | 1.64 | 1.64 | 1.81 | 1.78 | 1.92 | 2.06 |
| 12.72 | 1.27 | 1.30 | 1.48 | 1.42 | 1.45 | 1.56 | 1.53 | 1.62 | 1.90 | 1.79 | 2.01 |
| 12.92 | 1.27 | 1.39 | 1.58 | 1.64 | 1.64 | 1.71 | 1.88 | 1.72 | 1.88 | 2.02 | 2.02 |
| 13.12 | 1.18 | 1.54 | 1.46 | 1.46 | 1.61 | 1.50 | 1.52 | 1.76 | 1.74 | 1.72 | 1.83 |
| 13.32 | 1.20 | 1.44 | 1.60 | 1.53 | 1.54 | 1.81 | 1.86 | 2.06 | 2.04 | 1.98 | 2.11 |
| 13.52 | 0.73 | 1.17 | 1.20 | 1.35 | 1.27 | 1.51 | 1.66 | 1.47 | 1.64 | 1.79 | 1.84 |
| 13.72 | 1.43 | 1.45 | 1.76 | 1.69 | 1.82 | 1.87 | 1.78 | 1.96 | 1.96 | 1.92 | 2.09 |
| 13.92 | 1.31 | 1.26 | 1.34 | 1.41 | 1.49 | 1.53 | 1.73 | 1.57 | 1.93 | 2.14 | 2.22 |
| 14.00 | 1.21 | 1.29 | 1.42 | 1.50 | 1.54 | 1.65 | 1.74 | 1.87 | 1.99 | 1.87 | 2.10 |
| 14.08 | 1.00 | 1.26 | 1.29 | 1.18 | 1.44 | 1.49 | 1.54 | 1.53 | 1.67 | 1.60 | 1.75 |
| 14.17 | 1.11 | 1.07 | 1.13 | 1.49 | 1.51 | 1.52 | 1.46 | 1.59 | 1.70 | 1.82 | 1.78 |
| 14.27 | 1.24 | 1.37 | 1.43 | 1.50 | 1.47 | 1.69 | 1.63 | 1.68 | 1.77 | 1.94 | 2.07 |
| 14.38 | 1.29 | 1.35 | 1.54 | 1.61 | 1.67 | 1.62 | 1.67 | 1.80 | 1.85 | 1.83 | 2.02 |
| 14.49 | 1.37 | 1.39 | 1.63 | 1.61 | 1.56 | 1.69 | 1.88 | 1.86 | 1.96 | 2.05 | 2.03 |
| 14.61 | 1.08 | 1.42 | 1.45 | 1.54 | 1.56 | 1.46 | 1.62 | 1.65 | 1.76 | 1.87 | 1.95 |
| 14.75 | 1.12 | 1.18 | 1.49 | 1.50 | 1.48 | 1.43 | 1.57 | 1.63 | 1.69 | 1.72 | 1.92 |
| 14.89 | 1.11 | 1.36 | 1.40 | 1.45 | 1.56 | 1.54 | 1.72 | 1.78 | 1.81 | 2.10 | 2.26 |
| 15.05 | 1.37 | 1.43 | 1.62 | 1.53 | 1.48 | 1.59 | 1.79 | 1.78 | 1.88 | 2.10 | 2.09 |
| 15.21 | 1.23 | 1.47 | 1.59 | 1.58 | 1.73 | 1.72 | 1.75 | 1.78 | 1.90 | 2.06 | 2.08 |
| 15.39 | 1.11 | 1.24 | 1.35 | 1.49 | 1.54 | 1.49 | 1.65 | 1.66 | 1.84 | 1.91 | 2.12 |
| 15.59 | 1.33 | 1.45 | 1.54 | 1.32 | 1.48 | 1.43 | 1.47 | 1.50 | 1.63 | 1.79 | 1.92 |
| 15.80 | 1.12 | 1.28 | 1.47 | 1.42 | 1.58 | 1.55 | 1.58 | 1.85 | 1.78 | 1.81 | 2.09 |
| 16.02 | 0.89 | 1.07 | 1.30 | 1.27 | 1.38 | 1.55 | 1.36 | 1.49 | 1.71 | 1.87 | 1.84 |
| 16.27 | 1.32 | 1.19 | 1.50 | 1.55 | 1.50 | 1.62 | 1.63 | 1.68 | 1.96 | 1.84 | 1.87 |
| 16.53 | 1.35 | 1.36 | 1.50 | 1.57 | 1.47 | 1.58 | 1.70 | 1.81 | 1.78 | 1.81 | 1.92 |
| 16.81 | 1.09 | 1.09 | 1.26 | 1.23 | 1.39 | 1.32 | 1.44 | 1.75 | 1.83 | 1.68 | 1.97 |
| 17.12 | 0.97 | 1.16 | 1.08 | 1.31 | 1.52 | 1.45 | 1.47 | 1.71 | 1.69 | 1.67 | 1.87 |
| 17.45 | 1.04 | 0.99 | 1.19 | 1.27 | 1.33 | 1.40 | 1.34 | 1.40 | 1.55 | 1.54 | 1.71 |
| 17.81 | 1.20 | 1.20 | 1.21 | 1.41 | 1.64 | 1.45 | 1.65 | 1.70 | 1.75 | 1.76 | 1.92 |
| 18.19 | 1.40 | 1.38 | 1.44 | 1.39 | 1.54 | 1.57 | 1.62 | 1.62 | 1.95 | 1.86 | 2.12 |
| 18.60 | 1.24 | 1.28 | 1.55 | 1.47 | 1.57 | 1.64 | 1.67 | 1.97 | 1.99 | 1.81 | 2.05 |
| 19.05 | 1.04 | 1.23 | 1.31 | 1.34 | 1.41 | 1.40 | 1.55 | 1.61 | 1.72 | 1.65 | 1.98 |
| 19.53 | 1.20 | 1.18 | 1.43 | 1.50 | 1.46 | 1.71 | 1.54 | 1.78 | 1.62 | 1.81 | 1.98 |
| 20.05 | 1.50 | 1.36 | 1.49 | 1.64 | 1.59 | 1.65 | 1.62 | 1.93 | 1.96 | 1.92 | 2.09 |
| 20.61 | 1.22 | 1.44 | 1.73 | 1.60 | 1.61 | 1.69 | 1.76 | 1.96 | 1.89 | 2.02 | 2.10 |
| 21.22 | 1.21 | 1.37 | 1.51 | 1.49 | 1.42 | 1.46 | 1.75 | 1.68 | 1.90 | 1.78 | 2.02 |
| 21.87 | 1.11 | 1.25 | 1.35 | 1.51 | 1.53 | 1.42 | 1.56 | 1.76 | 1.76 | 1.92 | 2.08 |
| 22.57 | 1.28 | 1.27 | 1.60 | 1.52 | 1.32 | 1.51 | 1.66 | 1.69 | 1.84 | 1.89 | 2.06 |
| 23.33 | 1.21 | 1.25 | 1.35 | 1.40 | 1.25 | 1.64 | 1.57 | 1.54 | 1.81 | 1.76 | 2.08 |
| 24.15 | 1.13 | 1.28 | 1.38 | 1.32 | 1.41 | 1.64 | 1.57 | 1.51 | 1.63 | 1.78 | 2.08 |
| 25.03 | 1.11 | 1.34 | 1.34 | 1.46 | 1.37 | 1.37 | 1.62 | 1.63 | 1.63 | 1.71 | 2.00 |
| 25.98 | 1.56 | 1.32 | 1.41 | 1.40 | 1.53 | 1.61 | 1.48 | 1.78 | 1.78 | 1.93 | 1.93 |

|        |      |      |      |      |      |      |      |      |      |      |      |
|--------|------|------|------|------|------|------|------|------|------|------|------|
| 27.01  | 1.15 | 1.27 | 1.24 | 1.29 | 1.36 | 1.49 | 1.48 | 1.64 | 1.63 | 1.63 | 1.95 |
| 28.11  | 1.30 | 1.39 | 1.34 | 1.50 | 1.31 | 1.48 | 1.60 | 1.65 | 1.89 | 1.90 | 2.02 |
| 29.30  | 1.22 | 1.22 | 1.30 | 1.19 | 1.44 | 1.47 | 1.47 | 1.50 | 1.60 | 1.78 | 1.83 |
| 30.59  | 1.14 | 1.20 | 1.39 | 1.45 | 1.52 | 1.56 | 1.71 | 1.77 | 1.83 | 1.84 | 2.12 |
| 31.98  | 1.42 | 1.38 | 1.49 | 1.26 | 1.48 | 1.43 | 1.60 | 1.56 | 1.64 | 1.81 | 2.04 |
| 33.47  | 1.04 | 1.42 | 1.30 | 1.52 | 1.53 | 1.50 | 1.52 | 1.75 | 1.70 | 1.82 | 1.94 |
| 35.09  | 1.19 | 1.37 | 1.36 | 1.64 | 1.52 | 1.61 | 1.63 | 1.76 | 1.86 | 1.76 | 2.07 |
| 36.83  | 1.23 | 1.16 | 1.38 | 1.39 | 1.48 | 1.54 | 1.49 | 1.65 | 1.84 | 1.70 | 1.84 |
| 38.71  | 1.26 | 1.41 | 1.38 | 1.52 | 1.45 | 1.47 | 1.44 | 1.54 | 1.72 | 1.73 | 1.84 |
| 40.73  | 1.04 | 1.27 | 1.48 | 1.46 | 1.48 | 1.43 | 1.54 | 1.52 | 1.74 | 1.74 | 1.85 |
| 42.92  | 1.33 | 1.28 | 1.50 | 1.36 | 1.43 | 1.47 | 1.59 | 1.77 | 1.76 | 1.82 | 2.14 |
| 45.27  | 1.08 | 1.23 | 1.31 | 1.17 | 1.43 | 1.41 | 1.51 | 1.64 | 1.78 | 1.84 | 1.97 |
| 47.81  | 1.24 | 1.13 | 1.21 | 1.47 | 1.41 | 1.48 | 1.62 | 1.64 | 1.66 | 1.92 | 1.90 |
| 50.55  | 1.18 | 1.15 | 1.23 | 1.43 | 1.25 | 1.53 | 1.47 | 1.73 | 1.78 | 1.68 | 1.87 |
| 53.51  | 1.22 | 1.25 | 1.28 | 1.32 | 1.53 | 1.50 | 1.55 | 1.59 | 1.78 | 1.78 | 1.85 |
| 56.69  | 1.16 | 1.31 | 1.21 | 1.54 | 1.50 | 1.59 | 1.53 | 1.66 | 1.80 | 1.92 | 1.98 |
| 60.13  | 1.09 | 1.27 | 1.33 | 1.28 | 1.38 | 1.54 | 1.62 | 1.65 | 1.72 | 1.80 | 1.87 |
| 63.84  | 1.28 | 1.46 | 1.44 | 1.56 | 1.29 | 1.61 | 1.60 | 1.78 | 1.66 | 1.83 | 1.97 |
| 67.83  | 1.24 | 1.23 | 1.25 | 1.40 | 1.43 | 1.44 | 1.52 | 1.63 | 1.62 | 1.90 | 1.95 |
| 72.15  | 1.04 | 1.05 | 1.29 | 1.27 | 1.24 | 1.35 | 1.34 | 1.42 | 1.52 | 1.67 | 1.84 |
| 76.80  | 0.97 | 1.23 | 1.13 | 1.23 | 1.35 | 1.48 | 1.36 | 1.54 | 1.49 | 1.57 | 1.68 |
| 81.81  | 1.12 | 1.29 | 1.23 | 1.16 | 1.29 | 1.38 | 1.59 | 1.63 | 1.67 | 1.72 | 1.74 |
| 87.22  | 0.97 | 0.97 | 1.06 | 1.34 | 1.33 | 1.29 | 1.32 | 1.38 | 1.57 | 1.65 | 1.62 |
| 93.06  | 1.12 | 1.25 | 1.30 | 1.23 | 1.15 | 1.28 | 1.42 | 1.52 | 1.63 | 1.71 | 1.78 |
| 99.35  | 1.09 | 1.19 | 1.31 | 1.31 | 1.31 | 1.40 | 1.39 | 1.53 | 1.66 | 1.64 | 1.72 |
| 106.13 | 1.12 | 1.26 | 1.34 | 1.34 | 1.38 | 1.39 | 1.43 | 1.47 | 1.61 | 1.53 | 1.87 |
| 113.45 | 0.97 | 1.31 | 1.24 | 1.27 | 1.45 | 1.50 | 1.54 | 1.66 | 1.60 | 1.72 | 1.86 |
| 121.34 | 1.11 | 1.16 | 1.40 | 1.38 | 1.39 | 1.18 | 1.43 | 1.54 | 1.72 | 1.87 | 1.82 |
| 129.86 | 0.98 | 1.42 | 1.24 | 1.27 | 1.52 | 1.36 | 1.45 | 1.71 | 1.60 | 1.47 | 1.82 |
| 139.04 | 1.38 | 1.46 | 1.54 | 1.34 | 1.44 | 1.43 | 1.42 | 1.55 | 1.63 | 1.77 | 1.86 |
| 148.94 | 1.05 | 0.89 | 1.19 | 1.14 | 1.30 | 1.31 | 1.31 | 1.39 | 1.46 | 1.67 | 1.53 |
| 159.62 | 1.25 | 1.27 | 1.28 | 1.25 | 1.25 | 1.25 | 1.47 | 1.39 | 1.64 | 1.64 | 1.60 |
| 171.14 | 1.10 | 1.20 | 1.33 | 1.37 | 1.33 | 1.47 | 1.27 | 1.64 | 1.54 | 1.57 | 1.72 |
| 183.56 | 1.33 | 1.17 | 1.35 | 1.50 | 1.57 | 1.61 | 1.61 | 1.60 | 1.60 | 1.59 | 1.65 |
| 196.96 | 1.06 | 1.28 | 1.36 | 1.40 | 1.40 | 1.59 | 1.42 | 1.56 | 1.62 | 1.50 | 1.72 |
| 211.41 | 1.10 | 1.13 | 1.32 | 1.17 | 1.16 | 1.32 | 1.27 | 1.38 | 1.45 | 1.41 | 1.65 |
| 226.99 | 1.10 | 1.00 | 1.10 | 1.06 | 1.02 | 1.14 | 1.29 | 1.28 | 1.50 | 1.49 | 1.69 |
| 243.80 | 1.03 | 1.09 | 1.14 | 1.03 | 1.31 | 1.42 | 1.44 | 1.30 | 1.58 | 1.45 | 1.57 |
| 261.93 | 1.18 | 1.38 | 1.40 | 1.30 | 1.39 | 1.52 | 1.45 | 1.66 | 1.72 | 1.63 | 1.84 |
| 281.48 | 1.14 | 1.43 | 1.35 | 1.34 | 1.39 | 1.36 | 1.44 | 1.58 | 1.67 | 1.67 | 1.76 |
| 302.56 | 1.09 | 1.07 | 1.28 | 1.10 | 1.45 | 1.47 | 1.35 | 1.53 | 1.51 | 1.70 | 1.67 |
| 325.30 | 0.97 | 1.08 | 1.19 | 1.08 | 1.15 | 1.17 | 1.30 | 1.40 | 1.20 | 1.53 | 1.54 |
| 349.83 | 0.88 | 0.84 | 1.09 | 1.14 | 1.13 | 1.06 | 1.32 | 1.25 | 1.20 | 1.40 | 1.40 |
| 376.28 | 1.09 | 1.05 | 1.09 | 1.28 | 1.29 | 1.35 | 1.34 | 1.30 | 1.45 | 1.40 | 1.82 |
| 404.81 | 1.23 | 1.23 | 1.38 | 1.33 | 1.38 | 1.38 | 1.37 | 1.50 | 1.67 | 1.62 | 1.86 |
| 435.58 | 1.14 | 1.11 | 1.18 | 1.30 | 1.25 | 1.32 | 1.26 | 1.29 | 1.47 | 1.49 | 1.70 |
| 468.76 | 1.01 | 0.94 | 1.08 | 1.06 | 1.02 | 1.22 | 1.04 | 1.20 | 1.34 | 1.42 | 1.56 |
| 504.55 | 0.96 | 1.02 | 1.14 | 1.16 | 1.02 | 0.85 | 1.09 | 1.24 | 1.29 | 1.23 | 1.44 |
| 543.15 | 0.72 | 0.94 | 0.98 | 1.22 | 1.18 | 1.25 | 1.18 | 1.27 | 1.42 | 1.37 | 1.41 |
| 584.78 | 0.91 | 0.91 | 1.03 | 0.91 | 1.00 | 1.06 | 0.95 | 1.16 | 1.19 | 1.22 | 1.15 |

|         |      |      |      |      |      |      |      |      |      |      |      |
|---------|------|------|------|------|------|------|------|------|------|------|------|
| 629.68  | 0.93 | 1.01 | 1.20 | 1.07 | 1.18 | 1.18 | 1.15 | 1.29 | 1.34 | 1.31 | 1.36 |
| 678.10  | 1.07 | 1.07 | 1.13 | 1.22 | 1.28 | 1.26 | 1.51 | 1.36 | 1.55 | 1.38 | 1.60 |
| 730.33  | 1.10 | 1.11 | 1.03 | 1.21 | 1.30 | 1.20 | 1.18 | 1.36 | 1.29 | 1.42 | 1.46 |
| 786.65  | 0.66 | 0.93 | 0.98 | 0.87 | 1.03 | 1.05 | 1.03 | 1.28 | 1.14 | 1.11 | 1.30 |
| 847.40  | 0.87 | 0.79 | 0.90 | 0.80 | 0.99 | 1.04 | 1.09 | 0.89 | 1.09 | 1.23 | 1.36 |
| 912.92  | 0.83 | 1.11 | 1.04 | 1.00 | 1.16 | 1.12 | 1.24 | 1.33 | 1.29 | 1.35 | 1.41 |
| 983.58  | 0.85 | 0.93 | 1.09 | 1.04 | 0.92 | 1.00 | 1.01 | 1.11 | 1.15 | 1.14 | 1.30 |
| 1059.78 | 0.86 | 1.03 | 1.17 | 0.93 | 0.92 | 1.15 | 1.12 | 1.15 | 1.20 | 1.05 | 1.21 |
| 1141.98 | 0.85 | 0.86 | 0.85 | 0.92 | 0.74 | 1.05 | 0.80 | 0.98 | 0.96 | 1.08 | 1.21 |
| 1230.62 | 0.71 | 0.87 | 0.90 | 0.92 | 1.05 | 1.07 | 1.04 | 1.15 | 1.08 | 1.15 | 1.16 |
| 1326.23 | 1.13 | 0.96 | 0.97 | 1.19 | 1.08 | 1.05 | 1.01 | 1.13 | 1.17 | 1.33 | 1.24 |
| 1429.34 | 0.47 | 0.90 | 0.82 | 0.75 | 0.73 | 0.92 | 0.84 | 0.87 | 1.02 | 1.10 | 1.07 |
| 1540.54 | 0.94 | 0.82 | 0.88 | 0.92 | 0.92 | 0.76 | 0.78 | 1.03 | 1.07 | 0.87 | 1.04 |
| 1660.48 | 0.90 | 0.90 | 1.00 | 1.01 | 0.81 | 1.00 | 0.89 | 0.89 | 1.02 | 1.00 | 0.99 |
| 1789.83 | 0.77 | 0.92 | 0.79 | 0.91 | 0.91 | 0.79 | 0.87 | 0.89 | 0.85 | 1.05 | 1.04 |
| 1929.34 | 0.70 | 0.66 | 0.69 | 0.73 | 0.66 | 0.80 | 0.81 | 0.82 | 1.03 | 0.91 | 0.93 |
| 2079.80 | 0.62 | 0.74 | 0.49 | 0.85 | 0.69 | 0.66 | 0.73 | 0.84 | 0.89 | 0.84 | 0.97 |
| 2242.08 | 0.81 | 0.62 | 0.82 | 0.82 | 0.98 | 0.82 | 0.95 | 0.78 | 0.99 | 1.00 | 0.92 |
| 2417.10 | 0.51 | 0.64 | 0.73 | 0.41 | 0.51 | 0.55 | 0.54 | 0.69 | 0.77 | 0.61 | 0.93 |
| 2605.85 | 0.47 | 0.39 | 0.57 | 0.63 | 0.54 | 0.53 | 0.60 | 0.64 | 0.81 | 0.88 | 0.91 |
| 2809.43 | 0.67 | 0.72 | 0.85 | 0.77 | 0.63 | 0.81 | 0.56 | 0.66 | 0.79 | 0.78 | 0.83 |
| 3028.99 | 0.68 | 0.69 | 0.62 | 0.67 | 0.76 | 0.55 | 0.86 | 0.77 | 0.84 | 0.71 | 0.90 |
| 3265.79 | 0.71 | 0.62 | 0.68 | 0.60 | 0.64 | 0.61 | 0.64 | 0.60 | 0.70 | 0.69 | 0.85 |
| 3521.18 | 0.73 | 0.72 | 0.76 | 0.60 | 0.71 | 0.64 | 0.62 | 0.73 | 0.75 | 0.87 | 0.87 |
| 3796.62 | 0.52 | 0.63 | 0.82 | 0.69 | 0.70 | 0.68 | 0.66 | 0.73 | 0.93 | 0.61 | 0.87 |

| Wavelength (nm) \ Time (ps) | 382.68 | 384.09 | 385.50 | 386.91 | 388.31 | 389.72 | 391.13 | 392.54 | 393.95 | 395.36 | 396.77 |
|-----------------------------|--------|--------|--------|--------|--------|--------|--------|--------|--------|--------|--------|
| -3.28                       | -0.08  | -0.06  | -0.08  | -0.05  | -0.09  | -0.04  | 0.02   | -0.03  | -0.01  | 0.01   | -0.04  |
| -2.78                       | -0.04  | 0.01   | -0.08  | -0.10  | 0.04   | -0.09  | -0.03  | -0.10  | -0.08  | -0.11  | -0.05  |
| -2.28                       | 0.12   | -0.02  | -0.05  | 0.00   | -0.05  | -0.07  | 0.05   | 0.08   | 0.02   | -0.05  | 0.08   |
| -1.78                       | 0.13   | 0.09   | 0.18   | 0.18   | 0.28   | 0.21   | 0.08   | 0.25   | 0.27   | 0.25   | 0.31   |
| -1.28                       | -0.09  | -0.06  | 0.08   | -0.03  | 0.06   | -0.07  | 0.02   | -0.10  | -0.09  | -0.03  | -0.05  |
| -0.78                       | -0.12  | 0.00   | -0.09  | -0.10  | -0.11  | -0.07  | -0.16  | -0.14  | -0.05  | -0.10  | -0.23  |
| -0.28                       | 0.07   | -0.06  | 0.08   | -0.01  | 0.06   | -0.04  | 0.09   | -0.01  | -0.05  | 0.12   | 0.04   |
| 0.22                        | 0.07   | 0.07   | -0.15  | -0.03  | -0.13  | 0.08   | 0.01   | -0.05  | -0.01  | -0.15  | -0.05  |
| 0.32                        | -0.05  | 0.05   | 0.14   | 0.06   | -0.13  | 0.11   | -0.02  | 0.04   | -0.02  | 0.10   | -0.15  |
| 0.42                        | -0.01  | -0.02  | -0.04  | 0.09   | 0.04   | -0.03  | -0.05  | 0.05   | 0.01   | -0.04  | 0.13   |
| 0.52                        | -0.02  | -0.05  | -0.03  | -0.01  | -0.09  | -0.09  | -0.04  | 0.01   | 0.14   | -0.09  | 0.11   |
| 0.62                        | -0.03  | 0.12   | 0.25   | 0.01   | -0.12  | -0.01  | -0.02  | 0.05   | 0.10   | 0.07   | -0.01  |
| 0.72                        | 0.04   | -0.04  | -0.08  | 0.04   | -0.08  | -0.02  | -0.17  | -0.15  | 0.03   | 0.08   | 0.03   |
| 0.77                        | 0.22   | -0.07  | 0.10   | -0.02  | 0.18   | 0.04   | 0.15   | 0.07   | 0.14   | 0.13   | 0.02   |
| 0.82                        | -0.14  | -0.03  | 0.05   | 0.13   | 0.01   | -0.06  | 0.00   | -0.01  | -0.06  | -0.11  | 0.01   |
| 0.87                        | -0.14  | -0.10  | -0.13  | 0.00   | -0.01  | 0.04   | 0.01   | 0.15   | 0.26   | 0.02   | 0.00   |
| 0.92                        | 1.94   | 1.28   | 0.84   | 0.46   | -0.09  | -0.11  | -0.21  | -0.18  | -0.22  | -0.17  | -0.10  |
| 0.97                        | 3.51   | 3.62   | 3.42   | 3.32   | 3.22   | 2.62   | 2.14   | 1.51   | 0.97   | 0.58   | 0.21   |
| 1.02                        | 5.32   | 5.52   | 5.95   | 6.19   | 6.10   | 5.96   | 5.90   | 5.59   | 5.11   | 4.70   | 4.18   |
| 1.07                        | 4.28   | 4.49   | 4.91   | 5.23   | 5.45   | 5.72   | 5.76   | 6.00   | 6.04   | 5.96   | 5.99   |
| 1.12                        | 4.16   | 4.28   | 4.53   | 4.86   | 5.23   | 5.28   | 5.56   | 5.98   | 6.24   | 6.40   | 6.70   |

|      |      |      |      |      |      |      |      |      |      |      |      |
|------|------|------|------|------|------|------|------|------|------|------|------|
| 1.17 | 3.53 | 3.63 | 3.98 | 4.06 | 4.21 | 4.41 | 4.75 | 4.89 | 5.13 | 5.13 | 5.47 |
| 1.22 | 3.61 | 3.82 | 3.84 | 4.03 | 4.22 | 4.39 | 4.71 | 4.70 | 4.90 | 5.08 | 5.43 |
| 1.27 | 3.39 | 3.71 | 3.69 | 4.09 | 3.92 | 4.16 | 4.28 | 4.53 | 4.70 | 4.92 | 5.07 |
| 1.32 | 3.30 | 3.36 | 3.36 | 3.72 | 4.01 | 3.97 | 4.21 | 4.39 | 4.56 | 4.74 | 4.86 |
| 1.37 | 3.28 | 3.16 | 3.53 | 3.60 | 3.67 | 3.62 | 3.86 | 3.98 | 4.29 | 4.27 | 4.42 |
| 1.42 | 3.12 | 3.23 | 3.33 | 3.50 | 3.66 | 3.71 | 3.94 | 3.97 | 4.21 | 4.28 | 4.61 |
| 1.47 | 3.06 | 3.16 | 3.13 | 3.39 | 3.42 | 3.64 | 3.66 | 3.94 | 4.09 | 4.26 | 4.45 |
| 1.52 | 3.15 | 2.91 | 3.17 | 3.31 | 3.28 | 3.36 | 3.52 | 3.91 | 3.89 | 4.02 | 4.22 |
| 1.57 | 2.82 | 2.79 | 3.17 | 3.26 | 3.36 | 3.41 | 3.62 | 3.71 | 3.84 | 4.01 | 4.02 |
| 1.62 | 2.91 | 2.77 | 3.14 | 3.34 | 3.39 | 3.63 | 3.66 | 3.77 | 3.76 | 4.01 | 4.07 |
| 1.67 | 2.97 | 2.97 | 3.12 | 3.31 | 3.37 | 3.49 | 3.69 | 3.68 | 3.97 | 3.91 | 4.39 |
| 1.72 | 2.84 | 2.89 | 2.71 | 3.09 | 3.08 | 3.30 | 3.46 | 3.63 | 3.66 | 3.99 | 3.84 |
| 1.77 | 2.70 | 2.71 | 2.96 | 3.13 | 3.10 | 3.14 | 3.51 | 3.37 | 3.67 | 3.80 | 3.91 |
| 1.82 | 2.59 | 2.72 | 2.95 | 3.05 | 3.08 | 3.01 | 3.11 | 3.44 | 3.59 | 3.55 | 3.75 |
| 1.87 | 2.62 | 2.60 | 2.72 | 2.98 | 2.94 | 3.02 | 3.25 | 3.33 | 3.46 | 3.71 | 3.65 |
| 1.92 | 2.60 | 2.80 | 3.01 | 3.07 | 3.21 | 3.39 | 3.51 | 3.44 | 3.57 | 3.87 | 3.75 |
| 1.97 | 2.77 | 2.70 | 2.78 | 3.12 | 2.85 | 3.24 | 3.31 | 3.56 | 3.69 | 3.74 | 3.76 |
| 2.02 | 2.65 | 2.59 | 2.75 | 2.95 | 3.01 | 3.18 | 3.27 | 3.31 | 3.60 | 3.59 | 3.82 |
| 2.07 | 2.52 | 2.57 | 2.82 | 2.87 | 2.80 | 2.96 | 3.13 | 3.30 | 3.41 | 3.49 | 3.58 |
| 2.12 | 2.86 | 2.86 | 2.91 | 3.28 | 3.16 | 3.32 | 3.59 | 3.60 | 3.76 | 3.88 | 3.79 |
| 2.17 | 2.68 | 2.66 | 2.75 | 3.05 | 2.96 | 3.09 | 3.19 | 3.30 | 3.55 | 3.57 | 3.76 |
| 2.22 | 2.63 | 2.53 | 2.59 | 2.91 | 3.03 | 3.04 | 3.00 | 3.14 | 3.39 | 3.59 | 3.70 |
| 2.27 | 2.45 | 2.50 | 2.52 | 2.73 | 2.76 | 3.02 | 3.06 | 3.32 | 3.53 | 3.61 | 3.74 |
| 2.32 | 2.33 | 2.44 | 2.52 | 2.75 | 2.80 | 2.89 | 3.03 | 3.26 | 3.53 | 3.42 | 3.39 |
| 2.37 | 2.60 | 2.62 | 2.77 | 2.99 | 2.95 | 3.03 | 3.24 | 3.36 | 3.40 | 3.58 | 3.74 |
| 2.42 | 2.54 | 2.70 | 2.85 | 2.83 | 3.07 | 2.93 | 3.32 | 3.40 | 3.45 | 3.45 | 3.69 |
| 2.47 | 2.47 | 2.47 | 2.66 | 2.81 | 2.68 | 3.00 | 3.18 | 3.20 | 3.42 | 3.36 | 3.57 |
| 2.52 | 2.55 | 2.75 | 2.87 | 2.86 | 2.86 | 2.94 | 3.23 | 3.32 | 3.40 | 3.48 | 3.68 |
| 2.57 | 2.42 | 2.45 | 2.56 | 2.91 | 2.81 | 2.93 | 2.96 | 3.08 | 3.37 | 3.48 | 3.49 |
| 2.62 | 2.27 | 2.27 | 2.37 | 2.69 | 2.63 | 2.78 | 2.90 | 3.15 | 3.15 | 3.33 | 3.47 |
| 2.67 | 2.44 | 2.39 | 2.63 | 2.73 | 2.80 | 2.78 | 3.02 | 3.06 | 3.20 | 3.29 | 3.47 |
| 2.72 | 2.50 | 2.47 | 2.80 | 2.69 | 2.91 | 2.96 | 2.99 | 3.13 | 3.25 | 3.37 | 3.45 |
| 2.77 | 2.57 | 2.64 | 2.77 | 3.08 | 3.15 | 3.11 | 3.32 | 3.38 | 3.52 | 3.53 | 3.68 |
| 2.82 | 2.38 | 2.40 | 2.53 | 2.62 | 2.79 | 2.99 | 2.90 | 3.16 | 3.42 | 3.25 | 3.55 |
| 2.87 | 2.37 | 2.39 | 2.58 | 2.78 | 2.80 | 2.80 | 3.04 | 2.96 | 3.17 | 3.31 | 3.44 |
| 2.92 | 2.39 | 2.43 | 2.51 | 2.75 | 2.84 | 2.77 | 2.92 | 3.06 | 3.21 | 3.41 | 3.43 |
| 2.97 | 2.41 | 2.43 | 2.45 | 2.64 | 2.80 | 2.86 | 2.85 | 2.95 | 3.31 | 3.29 | 3.35 |
| 3.02 | 2.51 | 2.65 | 2.62 | 2.87 | 2.91 | 2.98 | 3.09 | 3.24 | 3.42 | 3.55 | 3.59 |
| 3.07 | 2.51 | 2.54 | 2.67 | 2.87 | 2.97 | 3.00 | 3.06 | 3.21 | 3.30 | 3.38 | 3.53 |
| 3.12 | 2.51 | 2.51 | 2.74 | 2.85 | 3.09 | 2.89 | 3.14 | 3.35 | 3.50 | 3.45 | 3.48 |
| 3.17 | 2.26 | 2.21 | 2.59 | 2.77 | 2.82 | 2.90 | 2.88 | 3.12 | 3.49 | 3.56 | 3.51 |
| 3.22 | 2.22 | 2.31 | 2.54 | 2.81 | 2.54 | 2.79 | 3.01 | 3.18 | 3.49 | 3.36 | 3.42 |
| 3.27 | 2.35 | 2.52 | 2.77 | 2.76 | 3.01 | 2.74 | 3.14 | 3.17 | 3.43 | 3.42 | 3.52 |
| 3.32 | 2.52 | 2.55 | 2.63 | 2.83 | 2.96 | 2.97 | 3.20 | 3.09 | 3.39 | 3.46 | 3.49 |
| 3.37 | 2.38 | 2.60 | 2.26 | 2.66 | 2.78 | 2.73 | 2.90 | 3.14 | 3.19 | 3.24 | 3.37 |
| 3.42 | 2.42 | 2.44 | 2.73 | 2.94 | 3.05 | 3.11 | 3.13 | 3.40 | 3.51 | 3.54 | 3.60 |
| 3.47 | 2.44 | 2.22 | 2.49 | 2.66 | 2.85 | 2.78 | 2.91 | 3.17 | 3.33 | 3.36 | 3.40 |
| 3.52 | 2.30 | 2.40 | 2.56 | 2.81 | 2.76 | 2.97 | 2.96 | 3.08 | 3.23 | 3.41 | 3.44 |
| 3.57 | 2.33 | 2.33 | 2.51 | 2.75 | 2.76 | 2.86 | 2.95 | 3.12 | 3.18 | 3.32 | 3.38 |
| 3.62 | 2.26 | 2.30 | 2.40 | 2.58 | 2.76 | 2.92 | 3.06 | 3.00 | 3.31 | 3.38 | 3.35 |

|       |      |      |      |      |      |      |      |      |      |      |      |
|-------|------|------|------|------|------|------|------|------|------|------|------|
| 3.67  | 2.47 | 2.39 | 2.56 | 2.79 | 2.72 | 2.88 | 2.99 | 3.05 | 3.13 | 3.27 | 3.33 |
| 3.72  | 2.34 | 2.32 | 2.45 | 2.69 | 2.80 | 2.68 | 2.98 | 2.97 | 3.13 | 3.35 | 3.46 |
| 3.92  | 2.37 | 2.30 | 2.54 | 2.50 | 2.65 | 2.83 | 2.84 | 2.99 | 3.22 | 3.36 | 3.42 |
| 4.12  | 2.28 | 2.21 | 2.37 | 2.55 | 2.78 | 2.81 | 2.96 | 2.91 | 3.13 | 3.33 | 3.40 |
| 4.32  | 2.28 | 2.30 | 2.55 | 2.52 | 2.70 | 2.74 | 2.78 | 2.79 | 3.09 | 3.03 | 3.35 |
| 4.52  | 2.35 | 2.27 | 2.56 | 2.69 | 2.91 | 2.80 | 2.91 | 2.91 | 3.15 | 3.24 | 3.39 |
| 4.72  | 2.30 | 2.48 | 2.44 | 2.74 | 2.68 | 2.61 | 2.86 | 3.07 | 3.08 | 3.21 | 3.36 |
| 4.92  | 2.41 | 2.43 | 2.47 | 2.53 | 2.65 | 2.81 | 2.95 | 3.00 | 3.20 | 3.27 | 3.45 |
| 5.12  | 2.28 | 2.36 | 2.41 | 2.65 | 2.70 | 2.80 | 2.73 | 2.93 | 3.22 | 3.19 | 3.27 |
| 5.32  | 2.43 | 2.61 | 2.55 | 2.80 | 2.87 | 2.99 | 3.07 | 3.28 | 3.48 | 3.40 | 3.53 |
| 5.52  | 2.49 | 2.41 | 2.54 | 2.93 | 2.80 | 2.85 | 3.04 | 3.25 | 3.17 | 3.39 | 3.31 |
| 5.72  | 2.41 | 2.28 | 2.60 | 2.76 | 2.93 | 2.83 | 2.90 | 3.18 | 3.27 | 3.30 | 3.48 |
| 5.92  | 2.34 | 2.52 | 2.63 | 2.55 | 2.68 | 2.88 | 2.99 | 3.15 | 3.12 | 3.28 | 3.30 |
| 6.12  | 2.33 | 2.23 | 2.31 | 2.59 | 2.60 | 2.77 | 2.73 | 3.05 | 3.30 | 3.36 | 3.29 |
| 6.32  | 2.29 | 2.21 | 2.31 | 2.60 | 2.40 | 2.64 | 2.75 | 3.06 | 3.10 | 3.18 | 3.35 |
| 6.52  | 2.39 | 2.47 | 2.50 | 2.70 | 2.72 | 2.78 | 2.97 | 3.17 | 3.17 | 3.23 | 3.49 |
| 6.72  | 2.52 | 2.59 | 2.62 | 2.67 | 2.76 | 2.94 | 3.01 | 2.99 | 3.28 | 3.37 | 3.52 |
| 6.92  | 2.20 | 2.31 | 2.39 | 2.57 | 2.68 | 2.77 | 2.94 | 2.87 | 3.05 | 3.26 | 3.27 |
| 7.12  | 2.28 | 2.42 | 2.35 | 2.70 | 2.85 | 2.66 | 2.93 | 3.02 | 3.07 | 3.11 | 3.30 |
| 7.32  | 2.30 | 2.28 | 2.39 | 2.59 | 2.64 | 2.71 | 2.81 | 3.11 | 3.29 | 3.21 | 3.35 |
| 7.52  | 2.18 | 2.17 | 2.43 | 2.49 | 2.59 | 2.76 | 2.92 | 2.91 | 3.16 | 3.29 | 3.47 |
| 7.72  | 2.29 | 2.37 | 2.51 | 2.64 | 2.67 | 2.84 | 2.91 | 2.99 | 3.04 | 3.20 | 3.40 |
| 7.92  | 2.13 | 2.33 | 2.34 | 2.56 | 2.70 | 2.69 | 2.85 | 2.92 | 2.98 | 3.39 | 3.25 |
| 8.12  | 2.37 | 2.32 | 2.47 | 2.53 | 2.74 | 2.79 | 2.80 | 2.98 | 3.20 | 3.35 | 3.44 |
| 8.32  | 2.10 | 2.31 | 2.43 | 2.78 | 2.55 | 2.78 | 2.90 | 3.00 | 3.08 | 3.17 | 3.24 |
| 8.52  | 2.10 | 1.87 | 2.16 | 2.42 | 2.34 | 2.51 | 2.39 | 2.76 | 2.79 | 2.99 | 2.97 |
| 8.72  | 1.99 | 2.12 | 2.33 | 2.53 | 2.44 | 2.59 | 2.60 | 2.91 | 2.91 | 3.07 | 3.32 |
| 8.92  | 2.20 | 2.42 | 2.55 | 2.58 | 2.65 | 2.68 | 2.96 | 2.87 | 2.94 | 3.17 | 3.16 |
| 9.12  | 2.13 | 2.32 | 2.44 | 2.76 | 2.64 | 2.63 | 2.74 | 2.88 | 3.23 | 3.34 | 3.50 |
| 9.32  | 2.17 | 2.17 | 2.51 | 2.52 | 2.57 | 2.66 | 2.68 | 2.78 | 2.99 | 3.18 | 3.08 |
| 9.52  | 2.19 | 2.27 | 2.38 | 2.53 | 2.65 | 2.63 | 2.88 | 2.96 | 3.15 | 3.05 | 3.36 |
| 9.72  | 2.29 | 2.08 | 2.39 | 2.38 | 2.54 | 2.52 | 2.78 | 2.81 | 3.08 | 3.07 | 3.29 |
| 9.92  | 2.44 | 2.34 | 2.49 | 2.50 | 2.78 | 2.76 | 2.86 | 3.07 | 3.25 | 3.32 | 3.19 |
| 10.12 | 2.50 | 2.45 | 2.38 | 2.80 | 2.93 | 2.89 | 2.98 | 3.11 | 3.35 | 3.34 | 3.47 |
| 10.32 | 1.93 | 2.18 | 2.34 | 2.58 | 2.61 | 2.58 | 2.74 | 2.84 | 3.01 | 2.97 | 3.21 |
| 10.52 | 2.16 | 2.25 | 2.41 | 2.41 | 2.72 | 2.80 | 2.73 | 2.90 | 3.08 | 3.27 | 3.37 |
| 10.72 | 2.14 | 2.21 | 2.38 | 2.73 | 2.55 | 2.74 | 2.74 | 3.00 | 3.14 | 3.01 | 3.21 |
| 10.92 | 2.12 | 1.97 | 2.20 | 2.50 | 2.47 | 2.54 | 2.67 | 2.92 | 2.84 | 3.00 | 3.04 |
| 11.12 | 2.32 | 2.24 | 2.30 | 2.30 | 2.54 | 2.63 | 2.56 | 2.88 | 3.05 | 3.20 | 3.21 |
| 11.32 | 2.56 | 2.46 | 2.49 | 2.75 | 2.61 | 2.82 | 2.83 | 3.05 | 3.12 | 3.34 | 3.40 |
| 11.52 | 2.07 | 2.13 | 2.18 | 2.41 | 2.42 | 2.61 | 2.72 | 2.81 | 2.84 | 2.92 | 3.05 |
| 11.72 | 2.38 | 2.32 | 2.46 | 2.50 | 2.53 | 2.73 | 2.89 | 3.06 | 3.13 | 3.18 | 3.17 |
| 11.92 | 2.17 | 2.15 | 2.31 | 2.46 | 2.55 | 2.61 | 2.83 | 2.93 | 2.91 | 3.03 | 3.19 |
| 12.12 | 2.43 | 2.17 | 2.55 | 2.48 | 2.53 | 2.68 | 2.77 | 2.89 | 3.16 | 3.11 | 3.17 |
| 12.32 | 2.32 | 2.24 | 2.44 | 2.58 | 2.51 | 2.77 | 2.88 | 3.01 | 2.91 | 3.07 | 3.40 |
| 12.52 | 2.13 | 2.18 | 2.32 | 2.63 | 2.50 | 2.68 | 2.72 | 2.96 | 3.11 | 3.12 | 3.13 |
| 12.72 | 2.15 | 2.15 | 2.28 | 2.49 | 2.42 | 2.54 | 2.69 | 2.94 | 3.08 | 3.07 | 3.28 |
| 12.92 | 2.06 | 2.34 | 2.40 | 2.55 | 2.70 | 2.67 | 2.82 | 2.92 | 3.15 | 3.20 | 3.22 |
| 13.12 | 1.87 | 2.02 | 2.22 | 2.49 | 2.36 | 2.45 | 2.61 | 2.62 | 2.81 | 2.89 | 2.94 |
| 13.32 | 2.30 | 2.26 | 2.42 | 2.39 | 2.37 | 2.59 | 2.86 | 2.82 | 3.06 | 2.96 | 3.22 |

|       |      |      |      |      |      |      |      |      |      |      |      |
|-------|------|------|------|------|------|------|------|------|------|------|------|
| 13.52 | 1.99 | 2.04 | 2.13 | 2.46 | 2.36 | 2.41 | 2.55 | 2.65 | 2.76 | 2.92 | 3.08 |
| 13.72 | 2.30 | 2.30 | 2.33 | 2.68 | 2.71 | 2.83 | 2.83 | 3.13 | 3.17 | 3.33 | 3.51 |
| 13.92 | 2.04 | 2.12 | 2.42 | 2.58 | 2.42 | 2.41 | 2.85 | 2.79 | 2.77 | 2.98 | 3.00 |
| 14.00 | 2.27 | 2.23 | 2.47 | 2.67 | 2.60 | 2.76 | 2.85 | 2.89 | 3.13 | 3.08 | 3.30 |
| 14.08 | 1.94 | 1.95 | 2.15 | 2.16 | 2.52 | 2.30 | 2.54 | 2.66 | 2.94 | 2.90 | 3.03 |
| 14.17 | 2.01 | 2.14 | 2.17 | 2.24 | 2.28 | 2.36 | 2.50 | 2.65 | 2.90 | 3.12 | 3.10 |
| 14.27 | 2.15 | 2.10 | 2.37 | 2.57 | 2.49 | 2.52 | 2.59 | 2.80 | 3.00 | 3.04 | 3.08 |
| 14.38 | 1.97 | 2.34 | 2.36 | 2.44 | 2.52 | 2.70 | 2.75 | 2.85 | 3.05 | 3.16 | 3.14 |
| 14.49 | 2.18 | 2.21 | 2.42 | 2.41 | 2.48 | 2.59 | 2.88 | 2.70 | 2.89 | 3.14 | 3.16 |
| 14.61 | 2.04 | 2.09 | 2.18 | 2.36 | 2.30 | 2.56 | 2.54 | 2.73 | 2.84 | 2.99 | 2.89 |
| 14.75 | 2.15 | 1.87 | 2.15 | 2.12 | 2.29 | 2.39 | 2.48 | 2.59 | 2.71 | 2.96 | 2.92 |
| 14.89 | 2.28 | 2.27 | 2.62 | 2.70 | 2.62 | 2.63 | 2.92 | 3.02 | 3.20 | 3.34 | 3.48 |
| 15.05 | 2.25 | 2.18 | 2.41 | 2.72 | 2.74 | 2.78 | 2.79 | 2.98 | 3.00 | 3.28 | 3.24 |
| 15.21 | 2.22 | 2.26 | 2.39 | 2.62 | 2.55 | 2.84 | 2.83 | 2.88 | 3.13 | 3.19 | 3.22 |
| 15.39 | 1.96 | 2.08 | 2.32 | 2.44 | 2.34 | 2.64 | 2.71 | 2.81 | 3.11 | 2.87 | 3.19 |
| 15.59 | 1.98 | 2.04 | 2.20 | 2.18 | 2.44 | 2.32 | 2.47 | 2.60 | 2.95 | 2.92 | 2.89 |
| 15.80 | 2.28 | 2.20 | 2.28 | 2.47 | 2.51 | 2.68 | 2.64 | 2.75 | 3.19 | 3.14 | 3.25 |
| 16.02 | 1.90 | 2.15 | 2.06 | 2.30 | 2.31 | 2.39 | 2.59 | 2.64 | 2.74 | 2.97 | 3.01 |
| 16.27 | 2.11 | 2.12 | 2.44 | 2.53 | 2.56 | 2.61 | 2.76 | 2.85 | 3.08 | 3.23 | 3.32 |
| 16.53 | 2.20 | 2.11 | 2.22 | 2.43 | 2.66 | 2.64 | 2.65 | 2.91 | 3.01 | 3.11 | 3.07 |
| 16.81 | 1.95 | 2.05 | 2.04 | 2.26 | 2.52 | 2.40 | 2.60 | 2.65 | 2.90 | 2.93 | 3.12 |
| 17.12 | 2.01 | 2.09 | 2.19 | 2.33 | 2.48 | 2.49 | 2.63 | 2.92 | 2.83 | 2.95 | 3.03 |
| 17.45 | 1.89 | 1.79 | 2.07 | 2.13 | 2.35 | 2.27 | 2.39 | 2.45 | 2.54 | 2.82 | 2.99 |
| 17.81 | 2.05 | 2.04 | 2.36 | 2.28 | 2.52 | 2.65 | 2.63 | 3.01 | 3.11 | 3.12 | 3.09 |
| 18.19 | 2.18 | 2.05 | 2.32 | 2.59 | 2.57 | 2.81 | 2.78 | 2.83 | 3.01 | 3.28 | 3.41 |
| 18.60 | 2.23 | 2.35 | 2.31 | 2.54 | 2.59 | 2.65 | 2.85 | 2.94 | 3.18 | 3.26 | 3.29 |
| 19.05 | 2.10 | 2.10 | 2.15 | 2.38 | 2.38 | 2.44 | 2.68 | 2.79 | 3.02 | 3.09 | 3.27 |
| 19.53 | 2.14 | 2.13 | 2.21 | 2.39 | 2.40 | 2.60 | 2.62 | 2.71 | 2.95 | 3.07 | 3.02 |
| 20.05 | 2.34 | 2.21 | 2.40 | 2.63 | 2.55 | 2.64 | 2.67 | 2.89 | 2.95 | 3.30 | 3.04 |
| 20.61 | 2.29 | 2.31 | 2.44 | 2.49 | 2.61 | 2.69 | 2.81 | 2.94 | 3.11 | 3.21 | 3.32 |
| 21.22 | 2.20 | 2.37 | 2.20 | 2.53 | 2.36 | 2.54 | 2.66 | 2.78 | 2.84 | 3.16 | 3.19 |
| 21.87 | 2.12 | 2.05 | 2.50 | 2.42 | 2.50 | 2.73 | 2.78 | 2.78 | 3.04 | 3.14 | 3.19 |
| 22.57 | 2.09 | 2.13 | 2.23 | 2.45 | 2.46 | 2.56 | 2.65 | 2.72 | 3.04 | 3.11 | 3.17 |
| 23.33 | 2.15 | 2.11 | 2.07 | 2.39 | 2.59 | 2.48 | 2.72 | 2.76 | 2.98 | 3.03 | 3.07 |
| 24.15 | 2.00 | 2.20 | 2.29 | 2.51 | 2.35 | 2.49 | 2.52 | 2.76 | 2.82 | 2.94 | 3.11 |
| 25.03 | 1.96 | 1.95 | 2.25 | 2.33 | 2.28 | 2.55 | 2.62 | 2.70 | 2.78 | 2.92 | 2.98 |
| 25.98 | 2.08 | 2.15 | 2.33 | 2.46 | 2.50 | 2.51 | 2.76 | 2.84 | 3.02 | 3.11 | 3.14 |
| 27.01 | 1.95 | 2.14 | 2.09 | 2.26 | 2.43 | 2.36 | 2.65 | 2.82 | 2.93 | 2.94 | 3.14 |
| 28.11 | 2.08 | 2.16 | 2.27 | 2.28 | 2.50 | 2.58 | 2.58 | 2.61 | 2.79 | 3.00 | 3.14 |
| 29.30 | 2.06 | 2.10 | 1.99 | 2.23 | 2.36 | 2.40 | 2.50 | 2.78 | 2.82 | 3.01 | 2.97 |
| 30.59 | 1.96 | 2.18 | 2.15 | 2.57 | 2.48 | 2.65 | 2.66 | 2.88 | 2.90 | 2.93 | 3.21 |
| 31.98 | 2.07 | 1.93 | 2.02 | 2.48 | 2.43 | 2.51 | 2.57 | 2.56 | 2.84 | 2.90 | 3.04 |
| 33.47 | 2.03 | 2.04 | 2.21 | 2.53 | 2.42 | 2.48 | 2.66 | 2.72 | 2.81 | 2.89 | 3.10 |
| 35.09 | 2.13 | 2.10 | 2.27 | 2.47 | 2.44 | 2.62 | 2.69 | 2.72 | 2.80 | 3.18 | 3.13 |
| 36.83 | 1.90 | 1.97 | 2.10 | 2.30 | 2.34 | 2.41 | 2.42 | 2.66 | 2.78 | 2.83 | 2.96 |
| 38.71 | 1.87 | 1.92 | 2.17 | 2.25 | 2.46 | 2.51 | 2.44 | 2.87 | 2.87 | 3.11 | 3.08 |
| 40.73 | 2.00 | 2.21 | 2.23 | 2.34 | 2.32 | 2.51 | 2.54 | 2.81 | 2.87 | 3.00 | 3.16 |
| 42.92 | 2.03 | 1.98 | 2.29 | 2.38 | 2.53 | 2.65 | 2.62 | 2.80 | 2.89 | 2.97 | 3.18 |
| 45.27 | 2.03 | 2.11 | 2.20 | 2.51 | 2.37 | 2.47 | 2.52 | 2.60 | 2.85 | 2.87 | 3.01 |
| 47.81 | 2.09 | 2.02 | 2.19 | 2.50 | 2.36 | 2.59 | 2.60 | 2.82 | 2.73 | 3.08 | 3.24 |

|         |      |      |      |      |      |      |      |      |      |      |      |
|---------|------|------|------|------|------|------|------|------|------|------|------|
| 50.55   | 1.96 | 1.95 | 1.91 | 2.15 | 2.22 | 2.40 | 2.35 | 2.46 | 2.65 | 2.69 | 2.87 |
| 53.51   | 2.09 | 2.25 | 2.13 | 2.36 | 2.30 | 2.49 | 2.67 | 2.70 | 2.89 | 3.02 | 3.08 |
| 56.69   | 2.06 | 1.97 | 2.23 | 2.39 | 2.27 | 2.43 | 2.53 | 2.75 | 2.76 | 3.04 | 3.09 |
| 60.13   | 2.06 | 2.09 | 1.97 | 2.24 | 2.45 | 2.32 | 2.40 | 2.52 | 2.76 | 2.63 | 2.72 |
| 63.84   | 2.06 | 2.25 | 2.15 | 2.35 | 2.56 | 2.56 | 2.76 | 2.73 | 2.96 | 3.15 | 3.09 |
| 67.83   | 2.01 | 2.20 | 2.14 | 2.30 | 2.42 | 2.24 | 2.57 | 2.62 | 2.84 | 2.77 | 2.95 |
| 72.15   | 1.82 | 1.82 | 2.18 | 2.11 | 2.26 | 2.26 | 2.44 | 2.53 | 2.72 | 2.85 | 2.98 |
| 76.80   | 1.90 | 1.74 | 2.09 | 2.16 | 2.08 | 2.35 | 2.44 | 2.68 | 2.55 | 2.62 | 2.83 |
| 81.81   | 1.85 | 2.00 | 2.12 | 2.27 | 2.42 | 2.43 | 2.49 | 2.57 | 2.90 | 2.87 | 2.93 |
| 87.22   | 1.87 | 1.92 | 1.97 | 2.20 | 2.19 | 2.43 | 2.51 | 2.64 | 2.62 | 2.71 | 2.89 |
| 93.06   | 1.69 | 1.97 | 2.22 | 2.10 | 2.25 | 2.42 | 2.42 | 2.41 | 2.70 | 2.61 | 2.75 |
| 99.35   | 1.85 | 1.87 | 2.08 | 2.03 | 2.20 | 2.33 | 2.43 | 2.64 | 2.69 | 2.81 | 2.84 |
| 106.13  | 1.96 | 1.83 | 2.18 | 2.41 | 2.35 | 2.37 | 2.36 | 2.61 | 2.69 | 2.69 | 2.90 |
| 113.45  | 1.90 | 2.26 | 2.29 | 2.38 | 2.37 | 2.53 | 2.60 | 2.80 | 2.83 | 3.04 | 3.03 |
| 121.34  | 1.92 | 1.94 | 2.00 | 2.20 | 2.04 | 2.19 | 2.30 | 2.52 | 2.67 | 2.75 | 2.82 |
| 129.86  | 1.81 | 1.85 | 1.98 | 2.28 | 2.21 | 2.26 | 2.29 | 2.47 | 2.73 | 2.64 | 2.75 |
| 139.04  | 2.00 | 1.94 | 2.07 | 2.19 | 2.19 | 2.34 | 2.46 | 2.42 | 2.70 | 2.72 | 2.93 |
| 148.94  | 1.66 | 1.76 | 1.93 | 1.97 | 2.05 | 2.17 | 2.09 | 2.36 | 2.37 | 2.50 | 2.57 |
| 159.62  | 1.80 | 1.67 | 2.02 | 2.09 | 2.26 | 2.32 | 2.40 | 2.49 | 2.59 | 2.61 | 2.66 |
| 171.14  | 1.95 | 1.83 | 1.93 | 2.17 | 2.28 | 2.46 | 2.49 | 2.60 | 2.62 | 2.74 | 2.88 |
| 183.56  | 2.07 | 1.87 | 2.06 | 2.18 | 2.15 | 2.26 | 2.31 | 2.31 | 2.44 | 2.62 | 2.58 |
| 196.96  | 1.82 | 1.97 | 1.92 | 2.32 | 2.28 | 2.34 | 2.25 | 2.43 | 2.71 | 2.72 | 2.82 |
| 211.41  | 1.72 | 1.68 | 1.92 | 1.97 | 2.09 | 2.20 | 2.20 | 2.34 | 2.52 | 2.53 | 2.63 |
| 226.99  | 1.64 | 1.72 | 1.72 | 1.99 | 2.01 | 2.14 | 2.20 | 2.40 | 2.61 | 2.49 | 2.60 |
| 243.80  | 1.67 | 1.73 | 1.65 | 1.99 | 1.96 | 2.03 | 2.20 | 2.31 | 2.33 | 2.40 | 2.55 |
| 261.93  | 1.83 | 1.85 | 1.95 | 1.94 | 2.23 | 2.22 | 2.31 | 2.43 | 2.55 | 2.61 | 2.79 |
| 281.48  | 1.85 | 1.87 | 2.02 | 2.20 | 1.99 | 2.28 | 2.23 | 2.48 | 2.61 | 2.68 | 2.73 |
| 302.56  | 1.63 | 1.62 | 1.84 | 1.87 | 2.05 | 2.10 | 2.07 | 2.21 | 2.36 | 2.45 | 2.58 |
| 325.30  | 1.70 | 1.79 | 1.87 | 2.06 | 1.92 | 2.16 | 2.00 | 2.16 | 2.38 | 2.44 | 2.63 |
| 349.83  | 1.47 | 1.63 | 1.73 | 1.89 | 1.77 | 1.84 | 2.19 | 2.03 | 2.19 | 2.19 | 2.37 |
| 376.28  | 1.68 | 1.73 | 1.73 | 1.88 | 1.93 | 2.07 | 2.05 | 2.11 | 2.41 | 2.44 | 2.61 |
| 404.81  | 1.69 | 1.82 | 1.86 | 2.13 | 1.91 | 2.02 | 2.34 | 2.24 | 2.47 | 2.44 | 2.78 |
| 435.58  | 1.73 | 1.77 | 1.78 | 1.91 | 2.10 | 2.11 | 2.12 | 2.21 | 2.52 | 2.40 | 2.54 |
| 468.76  | 1.45 | 1.52 | 1.71 | 1.86 | 1.82 | 1.86 | 2.06 | 2.19 | 2.23 | 2.31 | 2.48 |
| 504.55  | 1.44 | 1.41 | 1.52 | 1.78 | 1.81 | 1.79 | 1.73 | 2.01 | 2.09 | 2.17 | 2.12 |
| 543.15  | 1.48 | 1.53 | 1.63 | 1.79 | 1.72 | 1.86 | 1.82 | 1.95 | 2.26 | 2.28 | 2.28 |
| 584.78  | 1.44 | 1.37 | 1.54 | 1.52 | 1.64 | 1.80 | 1.93 | 1.97 | 1.88 | 2.11 | 2.23 |
| 629.68  | 1.41 | 1.53 | 1.53 | 1.68 | 1.76 | 1.84 | 1.67 | 1.96 | 2.10 | 2.34 | 2.06 |
| 678.10  | 1.64 | 1.77 | 1.55 | 1.75 | 1.65 | 1.93 | 1.99 | 2.03 | 2.06 | 2.25 | 2.26 |
| 730.33  | 1.59 | 1.63 | 1.80 | 1.79 | 1.89 | 2.01 | 1.87 | 1.98 | 2.13 | 2.30 | 2.39 |
| 786.65  | 1.52 | 1.24 | 1.70 | 1.59 | 1.68 | 1.83 | 1.88 | 2.02 | 2.02 | 2.17 | 2.15 |
| 847.40  | 1.15 | 1.20 | 1.38 | 1.65 | 1.46 | 1.40 | 1.60 | 1.71 | 1.91 | 1.95 | 2.02 |
| 912.92  | 1.23 | 1.44 | 1.59 | 1.58 | 1.70 | 1.72 | 1.90 | 2.07 | 2.03 | 2.14 | 2.19 |
| 983.58  | 1.29 | 1.40 | 1.59 | 1.58 | 1.67 | 1.58 | 1.73 | 1.79 | 2.02 | 2.10 | 2.10 |
| 1059.78 | 1.41 | 1.43 | 1.44 | 1.52 | 1.69 | 1.66 | 1.75 | 1.94 | 1.97 | 2.20 | 2.21 |
| 1141.98 | 1.26 | 1.30 | 1.41 | 1.41 | 1.46 | 1.56 | 1.55 | 1.70 | 1.92 | 1.75 | 1.91 |
| 1230.62 | 1.24 | 1.36 | 1.30 | 1.39 | 1.48 | 1.52 | 1.39 | 1.63 | 1.75 | 1.87 | 1.74 |
| 1326.23 | 1.42 | 1.43 | 1.67 | 1.76 | 1.58 | 1.64 | 1.76 | 1.79 | 1.93 | 1.99 | 1.91 |
| 1429.34 | 1.27 | 1.07 | 1.31 | 1.33 | 1.37 | 1.54 | 1.49 | 1.73 | 1.87 | 1.98 | 1.98 |
| 1540.54 | 1.22 | 1.25 | 1.29 | 1.45 | 1.50 | 1.64 | 1.74 | 1.71 | 1.88 | 1.92 | 1.99 |

|         |      |      |      |      |      |      |      |      |      |      |      |
|---------|------|------|------|------|------|------|------|------|------|------|------|
| 1660.48 | 1.20 | 1.27 | 1.10 | 1.57 | 1.48 | 1.49 | 1.73 | 1.68 | 1.89 | 2.00 | 2.06 |
| 1789.83 | 1.29 | 0.98 | 1.22 | 1.37 | 1.31 | 1.35 | 1.52 | 1.46 | 1.59 | 1.67 | 1.79 |
| 1929.34 | 1.03 | 1.07 | 1.23 | 1.38 | 1.28 | 1.37 | 1.53 | 1.51 | 1.61 | 1.66 | 1.80 |
| 2079.80 | 1.11 | 1.02 | 1.25 | 1.17 | 1.36 | 1.43 | 1.40 | 1.51 | 1.60 | 1.68 | 1.67 |
| 2242.08 | 1.03 | 1.09 | 1.19 | 1.17 | 1.39 | 1.29 | 1.42 | 1.55 | 1.62 | 1.64 | 1.68 |
| 2417.10 | 0.89 | 0.89 | 0.91 | 1.12 | 1.26 | 1.28 | 1.30 | 1.47 | 1.52 | 1.56 | 1.60 |
| 2605.85 | 1.06 | 1.05 | 1.15 | 1.14 | 1.13 | 1.24 | 1.39 | 1.45 | 1.53 | 1.61 | 1.49 |
| 2809.43 | 0.72 | 1.02 | 0.98 | 1.19 | 1.05 | 1.11 | 1.17 | 1.28 | 1.46 | 1.36 | 1.53 |
| 3028.99 | 0.88 | 0.96 | 1.10 | 1.11 | 1.11 | 1.22 | 1.14 | 1.34 | 1.37 | 1.39 | 1.48 |
| 3265.79 | 0.89 | 0.89 | 0.84 | 1.03 | 1.28 | 1.09 | 1.27 | 1.38 | 1.40 | 1.47 | 1.68 |
| 3521.18 | 1.06 | 0.98 | 1.11 | 1.26 | 1.34 | 1.16 | 1.28 | 1.38 | 1.49 | 1.58 | 1.57 |
| 3796.62 | 0.79 | 0.92 | 0.81 | 1.00 | 1.11 | 1.09 | 1.11 | 1.21 | 1.30 | 1.35 | 1.43 |

| Wavelength (nm) | 398.17 | 399.58 | 400.99 | 402.40 | 403.81 | 405.22 | 406.63 | 408.03 | 409.44 | 410.85 | 412.26 |
|-----------------|--------|--------|--------|--------|--------|--------|--------|--------|--------|--------|--------|
| -3.28           | -0.04  | -0.13  | -0.13  | 0.14   | 0.04   | -0.13  | -0.03  | 0.04   | -0.06  | -0.16  | -0.10  |
| -2.78           | -0.01  | 0.01   | -0.09  | -0.16  | -0.18  | 0.08   | -0.10  | -0.07  | -0.11  | 0.00   | -0.07  |
| -2.28           | -0.06  | 0.01   | 0.02   | -0.14  | 0.02   | -0.27  | -0.19  | -0.12  | -0.19  | -0.02  | -0.03  |
| -1.78           | 0.12   | 0.05   | 0.09   | 0.09   | 0.18   | 0.11   | 0.21   | -0.03  | 0.17   | 0.22   | 0.13   |
| -1.28           | -0.15  | 0.02   | -0.02  | -0.10  | -0.15  | -0.11  | -0.04  | -0.01  | 0.16   | -0.26  | -0.13  |
| -0.78           | -0.03  | -0.15  | -0.09  | 0.10   | -0.21  | -0.02  | 0.01   | -0.03  | -0.17  | 0.22   | 0.07   |
| -0.28           | 0.18   | 0.09   | 0.08   | 0.00   | 0.07   | 0.17   | 0.07   | -0.12  | -0.03  | 0.04   | 0.02   |
| 0.22            | -0.05  | 0.06   | 0.12   | -0.01  | 0.09   | 0.10   | 0.20   | 0.26   | 0.15   | 0.02   | 0.07   |
| 0.32            | -0.04  | -0.02  | 0.00   | -0.04  | 0.08   | 0.11   | -0.22  | -0.02  | 0.11   | -0.05  | 0.03   |
| 0.42            | 0.07   | 0.06   | 0.00   | 0.13   | 0.05   | -0.04  | 0.08   | 0.09   | -0.04  | -0.03  | -0.01  |
| 0.52            | 0.07   | -0.07  | -0.06  | -0.06  | 0.05   | 0.12   | 0.19   | -0.02  | -0.18  | 0.04   | 0.10   |
| 0.62            | 0.03   | -0.01  | 0.14   | -0.03  | -0.14  | 0.15   | 0.06   | -0.01  | -0.03  | -0.04  | 0.19   |
| 0.72            | -0.02  | -0.04  | 0.16   | -0.08  | 0.06   | 0.03   | 0.18   | -0.03  | 0.24   | -0.07  | 0.12   |
| 0.77            | 0.09   | 0.14   | 0.07   | -0.08  | -0.02  | 0.01   | 0.06   | 0.15   | 0.35   | 0.15   | -0.02  |
| 0.82            | -0.05  | -0.15  | -0.13  | -0.07  | -0.16  | 0.05   | 0.10   | -0.17  | 0.04   | 0.00   | -0.13  |
| 0.87            | 0.17   | 0.10   | 0.09   | 0.20   | 0.27   | -0.11  | 0.06   | 0.38   | 0.20   | 0.04   | 0.30   |
| 0.92            | -0.21  | -0.31  | -0.16  | -0.04  | 0.03   | -0.13  | 0.00   | -0.35  | -0.04  | -0.31  | -0.12  |
| 0.97            | -0.08  | -0.42  | -0.63  | -0.66  | -0.32  | -0.03  | 0.01   | -0.17  | 0.38   | -0.05  | -0.02  |
| 1.02            | 3.30   | 2.12   | 1.05   | -0.17  | -0.46  | -0.82  | -0.43  | -0.57  | -0.08  | -0.20  | -0.06  |
| 1.07            | 6.04   | 5.95   | 5.37   | 4.59   | 3.87   | 2.89   | 2.33   | 1.69   | 1.39   | 0.93   | 1.03   |
| 1.12            | 7.08   | 7.19   | 7.25   | 6.84   | 6.46   | 5.90   | 5.52   | 5.48   | 4.86   | 4.56   | 4.62   |
| 1.17            | 5.73   | 5.95   | 5.96   | 6.22   | 6.10   | 6.08   | 6.43   | 6.34   | 6.14   | 6.08   | 6.21   |
| 1.22            | 5.30   | 5.31   | 5.59   | 5.64   | 5.44   | 5.67   | 5.90   | 5.64   | 5.86   | 5.84   | 6.05   |
| 1.27            | 5.13   | 5.20   | 5.29   | 5.37   | 5.21   | 5.38   | 5.19   | 5.25   | 5.74   | 5.63   | 6.05   |
| 1.32            | 4.96   | 4.92   | 4.77   | 4.83   | 4.75   | 4.92   | 5.07   | 5.25   | 5.34   | 5.42   | 5.88   |
| 1.37            | 4.53   | 4.43   | 4.47   | 4.47   | 4.62   | 4.55   | 4.81   | 4.84   | 5.11   | 5.21   | 5.27   |
| 1.42            | 4.64   | 4.56   | 4.51   | 4.58   | 4.76   | 4.74   | 4.47   | 4.82   | 4.95   | 5.03   | 5.29   |
| 1.47            | 4.36   | 4.49   | 4.37   | 4.25   | 4.25   | 4.17   | 4.32   | 4.85   | 4.50   | 4.75   | 5.15   |
| 1.52            | 4.36   | 4.40   | 4.16   | 4.20   | 4.29   | 4.26   | 4.42   | 4.64   | 4.82   | 4.48   | 4.84   |
| 1.57            | 4.14   | 4.12   | 4.15   | 4.23   | 4.18   | 4.24   | 4.33   | 4.57   | 4.48   | 4.65   | 5.07   |
| 1.62            | 4.02   | 4.10   | 4.01   | 4.22   | 3.91   | 4.26   | 4.08   | 4.56   | 4.66   | 4.73   | 4.79   |
| 1.67            | 4.36   | 4.20   | 4.16   | 4.28   | 4.47   | 4.47   | 4.30   | 4.50   | 4.76   | 4.84   | 4.90   |
| 1.72            | 4.01   | 4.02   | 4.09   | 3.98   | 4.24   | 4.10   | 4.20   | 4.20   | 4.68   | 4.61   | 4.85   |
| 1.77            | 3.97   | 3.86   | 3.91   | 3.83   | 3.93   | 4.16   | 4.00   | 4.07   | 4.38   | 4.46   | 4.61   |



|      |      |      |      |      |      |      |      |      |      |      |      |
|------|------|------|------|------|------|------|------|------|------|------|------|
| 1.82 | 3.90 | 3.80 | 3.76 | 3.86 | 4.01 | 3.94 | 3.91 | 4.07 | 4.30 | 4.08 | 4.57 |
| 1.87 | 3.78 | 3.67 | 3.62 | 3.63 | 3.79 | 3.89 | 3.86 | 4.21 | 4.13 | 4.10 | 4.57 |
| 1.92 | 3.97 | 3.86 | 3.78 | 3.84 | 4.01 | 3.96 | 4.05 | 4.01 | 4.33 | 4.44 | 4.53 |
| 1.97 | 3.92 | 3.99 | 3.99 | 4.16 | 3.97 | 3.86 | 4.10 | 4.24 | 4.43 | 4.37 | 4.63 |
| 2.02 | 3.84 | 3.79 | 3.68 | 3.82 | 3.69 | 3.97 | 4.16 | 4.03 | 4.23 | 4.33 | 4.47 |
| 2.07 | 3.62 | 3.61 | 3.58 | 3.71 | 3.62 | 3.81 | 3.97 | 4.05 | 3.89 | 4.25 | 4.46 |
| 2.12 | 3.98 | 3.95 | 4.12 | 3.96 | 3.92 | 4.00 | 3.91 | 4.21 | 4.38 | 4.63 | 4.81 |
| 2.17 | 3.74 | 3.75 | 3.71 | 3.88 | 3.73 | 3.76 | 3.79 | 4.10 | 4.20 | 4.18 | 4.41 |
| 2.22 | 3.77 | 3.59 | 3.57 | 3.77 | 3.70 | 3.78 | 3.88 | 3.74 | 4.20 | 4.15 | 4.39 |
| 2.27 | 3.72 | 3.50 | 3.70 | 3.78 | 3.65 | 3.70 | 3.76 | 4.00 | 4.29 | 4.09 | 4.44 |
| 2.32 | 3.49 | 3.55 | 3.59 | 3.49 | 3.46 | 3.48 | 3.65 | 3.76 | 4.01 | 4.03 | 4.21 |
| 2.37 | 3.90 | 3.74 | 3.90 | 3.88 | 3.85 | 4.00 | 4.02 | 4.04 | 4.06 | 4.29 | 4.61 |
| 2.42 | 3.86 | 3.83 | 3.83 | 3.89 | 3.99 | 3.73 | 3.99 | 3.99 | 4.28 | 4.30 | 4.29 |
| 2.47 | 3.41 | 3.48 | 3.59 | 3.52 | 3.57 | 3.69 | 3.69 | 3.86 | 4.15 | 3.97 | 4.29 |
| 2.52 | 3.67 | 3.50 | 3.61 | 3.75 | 3.85 | 3.81 | 4.00 | 3.91 | 4.06 | 4.06 | 4.29 |
| 2.57 | 3.56 | 3.49 | 3.59 | 3.40 | 3.55 | 3.67 | 3.70 | 3.70 | 3.83 | 3.89 | 4.09 |
| 2.62 | 3.55 | 3.57 | 3.50 | 3.45 | 3.47 | 3.63 | 3.65 | 3.79 | 4.11 | 4.10 | 4.26 |
| 2.67 | 3.47 | 3.42 | 3.36 | 3.39 | 3.43 | 3.31 | 3.48 | 3.63 | 3.96 | 3.67 | 4.08 |
| 2.72 | 3.53 | 3.75 | 3.61 | 3.50 | 3.37 | 3.55 | 3.69 | 3.75 | 3.98 | 3.82 | 4.31 |
| 2.77 | 3.80 | 3.85 | 3.59 | 4.00 | 3.69 | 3.69 | 4.25 | 4.15 | 4.13 | 4.37 | 4.48 |
| 2.82 | 3.66 | 3.53 | 3.55 | 3.51 | 3.57 | 3.49 | 3.75 | 3.64 | 4.01 | 3.96 | 4.14 |
| 2.87 | 3.33 | 3.34 | 3.56 | 3.72 | 3.55 | 3.58 | 3.82 | 3.52 | 3.90 | 3.85 | 4.20 |
| 2.92 | 3.50 | 3.60 | 3.47 | 3.36 | 3.40 | 3.57 | 3.69 | 3.79 | 3.83 | 3.69 | 4.06 |
| 2.97 | 3.37 | 3.39 | 3.43 | 3.35 | 3.61 | 3.65 | 3.72 | 3.63 | 4.03 | 3.82 | 4.04 |
| 3.02 | 3.64 | 3.73 | 3.73 | 3.64 | 3.93 | 3.72 | 4.12 | 3.86 | 4.07 | 4.31 | 4.70 |
| 3.07 | 3.54 | 3.63 | 3.46 | 3.61 | 3.65 | 3.71 | 3.44 | 3.86 | 4.25 | 4.11 | 4.37 |
| 3.12 | 3.64 | 3.80 | 3.85 | 3.80 | 3.91 | 3.51 | 3.83 | 4.03 | 3.92 | 4.14 | 4.48 |
| 3.17 | 3.56 | 3.70 | 3.67 | 3.55 | 3.79 | 3.54 | 3.58 | 3.80 | 4.16 | 4.05 | 4.28 |
| 3.22 | 3.52 | 3.31 | 3.53 | 3.56 | 3.63 | 3.68 | 3.71 | 4.15 | 3.98 | 4.00 | 4.22 |
| 3.27 | 3.56 | 3.63 | 3.60 | 3.60 | 4.00 | 3.80 | 3.73 | 3.80 | 4.09 | 4.18 | 4.26 |
| 3.32 | 3.84 | 3.70 | 3.63 | 3.69 | 3.64 | 3.89 | 3.87 | 4.29 | 4.20 | 4.35 | 4.50 |
| 3.37 | 3.51 | 3.59 | 3.48 | 3.54 | 3.56 | 3.45 | 3.55 | 3.91 | 3.91 | 4.12 | 4.20 |
| 3.42 | 3.55 | 3.62 | 3.63 | 3.75 | 3.82 | 3.69 | 3.72 | 4.12 | 4.06 | 4.22 | 4.46 |
| 3.47 | 3.43 | 3.62 | 3.63 | 3.52 | 3.64 | 3.56 | 3.65 | 3.76 | 4.01 | 3.99 | 4.17 |
| 3.52 | 3.69 | 3.62 | 3.51 | 3.58 | 3.55 | 3.74 | 3.58 | 3.84 | 3.88 | 3.88 | 4.15 |
| 3.57 | 3.54 | 3.53 | 3.52 | 3.25 | 3.34 | 3.55 | 3.52 | 3.67 | 3.96 | 3.76 | 4.27 |
| 3.62 | 3.51 | 3.59 | 3.62 | 3.50 | 3.34 | 3.65 | 3.82 | 3.66 | 3.85 | 3.84 | 4.32 |
| 3.67 | 3.51 | 3.44 | 3.43 | 3.42 | 3.61 | 3.46 | 3.47 | 3.69 | 3.87 | 3.89 | 4.14 |
| 3.72 | 3.64 | 3.51 | 3.52 | 3.40 | 3.39 | 3.42 | 3.29 | 3.82 | 3.98 | 3.90 | 4.11 |
| 3.92 | 3.49 | 3.54 | 3.63 | 3.56 | 3.53 | 3.63 | 3.66 | 3.77 | 3.93 | 4.06 | 4.14 |
| 4.12 | 3.53 | 3.51 | 3.55 | 3.47 | 3.51 | 3.62 | 3.67 | 3.78 | 3.79 | 4.12 | 4.26 |
| 4.32 | 3.16 | 3.44 | 3.42 | 3.37 | 3.71 | 3.47 | 3.36 | 3.60 | 3.73 | 3.74 | 4.08 |
| 4.52 | 3.41 | 3.40 | 3.60 | 3.37 | 3.36 | 3.46 | 3.58 | 3.75 | 3.85 | 4.16 | 4.09 |
| 4.72 | 3.60 | 3.50 | 3.39 | 3.45 | 3.31 | 3.49 | 3.68 | 3.72 | 3.80 | 3.77 | 4.01 |
| 4.92 | 3.57 | 3.52 | 3.33 | 3.59 | 3.35 | 3.60 | 3.71 | 3.79 | 3.99 | 3.89 | 4.13 |
| 5.12 | 3.42 | 3.36 | 3.39 | 3.45 | 3.51 | 3.56 | 3.69 | 3.67 | 3.85 | 3.80 | 4.22 |
| 5.32 | 3.67 | 3.56 | 3.47 | 3.51 | 3.56 | 3.73 | 3.71 | 3.80 | 4.06 | 4.17 | 4.48 |
| 5.52 | 3.57 | 3.46 | 3.37 | 3.71 | 3.62 | 3.75 | 4.02 | 3.84 | 4.11 | 4.15 | 4.39 |
| 5.72 | 3.62 | 3.61 | 3.57 | 3.69 | 3.68 | 3.63 | 3.68 | 3.92 | 4.02 | 4.03 | 4.50 |
| 5.92 | 3.49 | 3.40 | 3.37 | 3.30 | 3.37 | 3.42 | 3.64 | 3.70 | 3.87 | 3.59 | 3.89 |

|       |      |      |      |      |      |      |      |      |      |      |      |
|-------|------|------|------|------|------|------|------|------|------|------|------|
| 6.12  | 3.42 | 3.46 | 3.43 | 3.41 | 3.44 | 3.73 | 3.54 | 3.78 | 3.92 | 3.88 | 4.12 |
| 6.32  | 3.39 | 3.30 | 3.33 | 3.34 | 3.41 | 3.43 | 3.27 | 3.71 | 3.77 | 3.74 | 3.97 |
| 6.52  | 3.52 | 3.49 | 3.44 | 3.55 | 3.55 | 3.54 | 3.70 | 3.69 | 3.97 | 3.96 | 4.17 |
| 6.72  | 3.51 | 3.57 | 3.49 | 3.55 | 3.62 | 3.64 | 3.81 | 4.04 | 4.12 | 4.17 | 4.49 |
| 6.92  | 3.36 | 3.35 | 3.43 | 3.37 | 3.38 | 3.53 | 3.60 | 3.67 | 4.10 | 3.81 | 4.45 |
| 7.12  | 3.40 | 3.36 | 3.35 | 3.28 | 3.41 | 3.54 | 3.91 | 3.72 | 3.87 | 3.71 | 4.14 |
| 7.32  | 3.49 | 3.40 | 3.49 | 3.70 | 3.68 | 3.59 | 3.72 | 3.71 | 4.06 | 4.03 | 4.30 |
| 7.52  | 3.42 | 3.35 | 3.31 | 3.31 | 3.49 | 3.31 | 3.62 | 3.69 | 3.88 | 3.74 | 4.18 |
| 7.72  | 3.44 | 3.35 | 3.41 | 3.32 | 3.27 | 3.45 | 3.29 | 3.88 | 3.62 | 3.90 | 4.04 |
| 7.92  | 3.46 | 3.36 | 3.40 | 3.49 | 3.51 | 3.54 | 3.67 | 3.68 | 3.92 | 3.73 | 4.11 |
| 8.12  | 3.49 | 3.63 | 3.41 | 3.50 | 3.59 | 3.66 | 3.76 | 4.03 | 4.00 | 4.20 | 4.51 |
| 8.32  | 3.41 | 3.40 | 3.34 | 3.32 | 3.34 | 3.44 | 3.83 | 3.71 | 3.78 | 3.92 | 4.22 |
| 8.52  | 3.16 | 3.28 | 3.23 | 3.09 | 3.42 | 3.20 | 3.44 | 3.46 | 3.71 | 3.46 | 3.91 |
| 8.72  | 3.33 | 3.46 | 3.38 | 3.32 | 3.49 | 3.37 | 3.42 | 3.76 | 3.79 | 3.84 | 4.12 |
| 8.92  | 3.31 | 3.14 | 3.35 | 3.10 | 3.45 | 3.30 | 3.41 | 3.32 | 3.85 | 3.65 | 3.96 |
| 9.12  | 3.57 | 3.42 | 3.38 | 3.40 | 3.43 | 3.50 | 3.51 | 3.71 | 3.90 | 4.05 | 4.31 |
| 9.32  | 3.14 | 3.20 | 3.23 | 3.37 | 3.40 | 3.28 | 3.65 | 3.36 | 3.54 | 3.64 | 3.99 |
| 9.52  | 3.38 | 3.37 | 3.47 | 3.32 | 3.22 | 3.22 | 3.43 | 3.47 | 4.07 | 3.94 | 4.18 |
| 9.72  | 3.27 | 3.20 | 3.30 | 3.21 | 3.41 | 3.59 | 3.60 | 3.79 | 3.94 | 3.93 | 4.14 |
| 9.92  | 3.52 | 3.48 | 3.48 | 3.38 | 3.51 | 3.41 | 3.40 | 3.67 | 3.86 | 3.98 | 3.99 |
| 10.12 | 3.56 | 3.58 | 3.46 | 3.48 | 3.59 | 3.64 | 3.87 | 3.88 | 3.95 | 3.77 | 4.26 |
| 10.32 | 3.20 | 3.04 | 3.38 | 3.20 | 3.27 | 3.25 | 3.18 | 3.54 | 3.64 | 3.63 | 4.09 |
| 10.52 | 3.40 | 3.39 | 3.55 | 3.32 | 3.53 | 3.38 | 3.55 | 3.72 | 3.83 | 4.09 | 4.16 |
| 10.72 | 3.27 | 3.20 | 3.34 | 3.23 | 3.53 | 3.52 | 3.51 | 3.39 | 3.83 | 3.92 | 4.25 |
| 10.92 | 3.26 | 3.10 | 3.20 | 3.13 | 3.21 | 3.35 | 3.47 | 3.53 | 3.82 | 3.72 | 4.13 |
| 11.12 | 3.30 | 3.41 | 3.17 | 3.22 | 3.35 | 3.41 | 3.47 | 3.64 | 3.80 | 3.72 | 4.02 |
| 11.32 | 3.47 | 3.54 | 3.59 | 3.66 | 3.53 | 3.42 | 3.60 | 3.81 | 4.12 | 3.94 | 4.48 |
| 11.52 | 3.08 | 3.19 | 3.35 | 3.07 | 3.14 | 3.36 | 3.63 | 3.56 | 3.68 | 3.63 | 4.26 |
| 11.72 | 3.27 | 3.38 | 3.35 | 3.24 | 3.33 | 3.64 | 3.72 | 3.70 | 3.99 | 4.04 | 4.35 |
| 11.92 | 3.26 | 3.21 | 3.29 | 3.20 | 3.11 | 3.29 | 3.37 | 3.50 | 3.78 | 3.87 | 4.13 |
| 12.12 | 3.29 | 3.30 | 3.37 | 3.28 | 3.36 | 3.71 | 3.43 | 3.82 | 3.88 | 4.02 | 4.31 |
| 12.32 | 3.18 | 3.36 | 3.38 | 3.39 | 3.38 | 3.68 | 3.58 | 3.73 | 3.83 | 4.09 | 4.21 |
| 12.52 | 3.26 | 3.27 | 3.25 | 3.36 | 3.33 | 3.26 | 3.66 | 3.57 | 3.61 | 3.82 | 3.92 |
| 12.72 | 3.31 | 3.37 | 3.15 | 3.23 | 3.44 | 3.45 | 3.56 | 3.72 | 3.86 | 4.08 | 4.21 |
| 12.92 | 3.45 | 3.37 | 3.40 | 3.29 | 3.40 | 3.47 | 3.66 | 3.74 | 3.89 | 4.07 | 4.06 |
| 13.12 | 3.16 | 3.13 | 3.16 | 3.08 | 3.10 | 3.18 | 3.35 | 3.35 | 3.86 | 3.62 | 3.75 |
| 13.32 | 3.39 | 3.37 | 3.23 | 3.33 | 3.16 | 3.53 | 3.72 | 3.48 | 3.78 | 3.69 | 4.04 |
| 13.52 | 2.99 | 3.07 | 2.95 | 3.19 | 3.06 | 3.32 | 3.35 | 3.56 | 3.63 | 3.74 | 3.98 |
| 13.72 | 3.42 | 3.33 | 3.42 | 3.39 | 3.60 | 3.62 | 3.53 | 3.65 | 3.96 | 4.08 | 4.17 |
| 13.92 | 3.13 | 3.10 | 3.39 | 3.13 | 3.34 | 3.36 | 3.43 | 3.54 | 3.72 | 3.99 | 3.88 |
| 14.00 | 3.37 | 3.37 | 3.45 | 3.56 | 3.47 | 3.55 | 3.47 | 3.64 | 4.05 | 4.08 | 4.30 |
| 14.08 | 3.24 | 3.17 | 3.23 | 3.13 | 3.29 | 3.10 | 3.47 | 3.75 | 3.45 | 3.70 | 4.14 |
| 14.17 | 3.16 | 3.16 | 3.22 | 3.11 | 3.00 | 3.26 | 3.26 | 3.52 | 3.64 | 3.68 | 3.91 |
| 14.27 | 3.19 | 3.29 | 3.33 | 3.37 | 3.36 | 3.35 | 3.47 | 3.62 | 3.89 | 3.82 | 4.08 |
| 14.38 | 3.17 | 3.35 | 3.17 | 3.13 | 3.15 | 3.20 | 3.38 | 3.56 | 3.63 | 3.67 | 3.86 |
| 14.49 | 3.12 | 3.25 | 3.13 | 3.38 | 3.13 | 3.44 | 3.26 | 3.47 | 3.66 | 3.77 | 4.06 |
| 14.61 | 3.26 | 3.15 | 3.24 | 3.25 | 3.26 | 3.28 | 3.43 | 3.49 | 3.87 | 3.83 | 3.98 |
| 14.75 | 3.14 | 3.07 | 3.28 | 3.02 | 3.27 | 3.21 | 3.46 | 3.77 | 3.63 | 3.71 | 3.98 |
| 14.89 | 3.51 | 3.56 | 3.48 | 3.59 | 3.66 | 3.55 | 3.76 | 3.74 | 3.88 | 4.21 | 4.38 |
| 15.05 | 3.40 | 3.53 | 3.33 | 3.08 | 3.56 | 3.39 | 3.58 | 3.27 | 3.62 | 3.90 | 4.15 |

|        |      |      |      |      |      |      |      |      |      |      |      |
|--------|------|------|------|------|------|------|------|------|------|------|------|
| 15.21  | 3.41 | 3.37 | 3.45 | 3.28 | 3.45 | 3.46 | 3.52 | 3.58 | 4.13 | 3.98 | 4.27 |
| 15.39  | 3.27 | 3.29 | 3.26 | 3.14 | 3.55 | 3.34 | 3.36 | 3.44 | 3.53 | 3.63 | 3.93 |
| 15.59  | 3.18 | 3.12 | 3.17 | 3.11 | 3.22 | 3.38 | 3.43 | 3.40 | 3.70 | 3.92 | 4.04 |
| 15.80  | 3.25 | 3.25 | 3.28 | 3.41 | 3.55 | 3.38 | 3.59 | 3.77 | 4.04 | 3.85 | 4.32 |
| 16.02  | 3.11 | 3.10 | 3.02 | 3.17 | 3.12 | 3.17 | 3.21 | 3.59 | 3.54 | 3.34 | 3.83 |
| 16.27  | 3.28 | 3.38 | 3.16 | 3.39 | 3.58 | 3.66 | 3.54 | 4.03 | 3.93 | 3.98 | 4.27 |
| 16.53  | 3.25 | 3.25 | 3.26 | 3.36 | 3.24 | 3.47 | 3.47 | 3.63 | 3.84 | 3.96 | 3.97 |
| 16.81  | 3.09 | 2.96 | 3.06 | 2.98 | 3.03 | 3.12 | 3.29 | 3.55 | 3.65 | 3.44 | 3.90 |
| 17.12  | 3.24 | 3.10 | 3.07 | 3.13 | 3.23 | 3.51 | 3.43 | 3.46 | 3.65 | 3.86 | 3.99 |
| 17.45  | 2.96 | 2.95 | 3.13 | 3.07 | 2.96 | 3.15 | 3.24 | 3.39 | 3.64 | 3.67 | 3.79 |
| 17.81  | 3.17 | 3.25 | 3.29 | 3.12 | 3.47 | 3.53 | 3.78 | 3.70 | 4.07 | 4.09 | 4.20 |
| 18.19  | 3.46 | 3.42 | 3.30 | 3.50 | 3.33 | 3.45 | 3.67 | 3.56 | 3.86 | 3.89 | 4.24 |
| 18.60  | 3.47 | 3.41 | 3.39 | 3.33 | 3.48 | 3.49 | 3.80 | 3.82 | 4.12 | 4.11 | 4.27 |
| 19.05  | 3.20 | 3.34 | 3.12 | 3.26 | 3.31 | 3.34 | 3.68 | 3.66 | 3.82 | 3.82 | 4.00 |
| 19.53  | 3.22 | 3.09 | 3.18 | 3.21 | 3.21 | 3.22 | 3.31 | 3.61 | 3.76 | 3.88 | 3.96 |
| 20.05  | 3.24 | 3.32 | 3.28 | 3.43 | 3.41 | 3.46 | 3.37 | 3.62 | 4.12 | 3.89 | 4.18 |
| 20.61  | 3.51 | 3.45 | 3.41 | 3.44 | 3.17 | 3.48 | 3.43 | 3.49 | 3.92 | 4.03 | 4.33 |
| 21.22  | 3.12 | 3.17 | 3.47 | 3.23 | 3.35 | 3.21 | 3.51 | 3.60 | 4.02 | 3.86 | 4.26 |
| 21.87  | 3.21 | 3.30 | 3.27 | 3.44 | 3.08 | 3.33 | 3.57 | 3.52 | 3.94 | 3.96 | 4.15 |
| 22.57  | 3.30 | 3.35 | 3.27 | 3.27 | 3.35 | 3.41 | 3.54 | 3.34 | 4.08 | 3.84 | 4.14 |
| 23.33  | 3.19 | 3.07 | 3.38 | 3.32 | 3.56 | 3.15 | 3.69 | 3.68 | 3.85 | 3.78 | 4.30 |
| 24.15  | 3.24 | 3.08 | 3.20 | 3.13 | 3.26 | 3.36 | 3.42 | 3.31 | 3.65 | 3.51 | 3.98 |
| 25.03  | 3.09 | 3.16 | 3.21 | 3.16 | 3.08 | 3.09 | 3.25 | 3.58 | 3.58 | 3.74 | 3.88 |
| 25.98  | 3.25 | 3.19 | 3.19 | 3.32 | 3.09 | 3.42 | 3.52 | 3.66 | 3.82 | 3.86 | 4.32 |
| 27.01  | 3.07 | 3.06 | 3.18 | 3.26 | 3.33 | 3.08 | 3.18 | 3.60 | 3.76 | 3.81 | 4.24 |
| 28.11  | 3.25 | 3.24 | 3.26 | 3.23 | 3.17 | 3.52 | 3.39 | 3.55 | 3.82 | 3.70 | 4.18 |
| 29.30  | 3.07 | 3.13 | 3.05 | 3.08 | 3.27 | 3.30 | 3.35 | 3.49 | 3.91 | 3.65 | 4.04 |
| 30.59  | 3.07 | 3.11 | 3.36 | 3.34 | 3.35 | 3.24 | 3.52 | 3.64 | 3.77 | 3.71 | 4.20 |
| 31.98  | 3.21 | 3.11 | 3.16 | 3.16 | 3.12 | 3.32 | 3.35 | 3.27 | 3.56 | 3.58 | 4.02 |
| 33.47  | 3.14 | 3.07 | 3.22 | 3.17 | 3.05 | 3.20 | 3.36 | 3.75 | 3.65 | 3.91 | 4.16 |
| 35.09  | 3.11 | 3.19 | 3.16 | 3.12 | 3.37 | 3.32 | 3.49 | 3.42 | 3.86 | 3.84 | 4.11 |
| 36.83  | 3.06 | 3.11 | 3.14 | 3.12 | 3.25 | 3.21 | 3.40 | 3.29 | 3.68 | 3.93 | 4.13 |
| 38.71  | 3.04 | 3.19 | 3.22 | 2.97 | 3.18 | 3.30 | 3.31 | 3.35 | 3.51 | 3.58 | 3.96 |
| 40.73  | 3.11 | 3.20 | 3.16 | 2.99 | 3.24 | 3.27 | 3.46 | 3.52 | 3.64 | 3.91 | 4.05 |
| 42.92  | 3.23 | 3.21 | 3.16 | 3.20 | 3.36 | 3.40 | 3.20 | 3.52 | 3.63 | 3.83 | 4.04 |
| 45.27  | 3.08 | 3.02 | 3.10 | 3.07 | 3.11 | 3.32 | 3.43 | 3.55 | 3.76 | 3.78 | 4.05 |
| 47.81  | 3.12 | 3.27 | 2.97 | 3.15 | 3.07 | 3.16 | 3.35 | 3.21 | 3.45 | 3.80 | 4.07 |
| 50.55  | 2.82 | 2.83 | 2.85 | 2.91 | 2.92 | 3.03 | 3.23 | 3.30 | 3.53 | 3.60 | 3.57 |
| 53.51  | 3.26 | 3.10 | 3.19 | 3.06 | 3.23 | 3.09 | 3.39 | 3.67 | 3.88 | 3.86 | 4.20 |
| 56.69  | 3.11 | 3.24 | 3.18 | 3.27 | 3.23 | 3.40 | 3.19 | 3.53 | 3.70 | 3.72 | 4.19 |
| 60.13  | 2.88 | 2.97 | 3.08 | 3.04 | 2.94 | 3.01 | 3.11 | 3.33 | 3.72 | 3.78 | 4.06 |
| 63.84  | 2.99 | 3.28 | 3.08 | 3.02 | 3.13 | 3.30 | 3.33 | 3.59 | 3.75 | 3.93 | 4.04 |
| 67.83  | 3.06 | 3.08 | 2.96 | 3.09 | 2.95 | 3.32 | 3.44 | 3.40 | 3.59 | 3.92 | 4.20 |
| 72.15  | 3.01 | 2.87 | 2.96 | 2.94 | 2.90 | 2.90 | 3.38 | 3.43 | 3.51 | 3.92 | 3.92 |
| 76.80  | 2.83 | 3.01 | 2.98 | 3.00 | 2.96 | 3.02 | 3.11 | 3.44 | 3.53 | 3.49 | 3.81 |
| 81.81  | 3.05 | 3.08 | 3.19 | 2.98 | 3.19 | 3.19 | 3.40 | 3.56 | 3.41 | 3.80 | 4.24 |
| 87.22  | 2.96 | 2.94 | 2.77 | 3.03 | 2.69 | 2.67 | 3.10 | 3.33 | 3.24 | 3.59 | 3.70 |
| 93.06  | 2.85 | 2.98 | 2.89 | 2.60 | 3.05 | 2.88 | 3.11 | 3.29 | 3.65 | 3.50 | 3.91 |
| 99.35  | 2.93 | 2.88 | 3.08 | 2.92 | 2.91 | 3.30 | 3.16 | 3.38 | 3.68 | 3.68 | 3.75 |
| 106.13 | 2.89 | 2.95 | 2.73 | 3.09 | 2.93 | 2.99 | 3.08 | 3.29 | 3.57 | 3.70 | 3.87 |

|         |      |      |      |      |      |      |      |      |      |      |      |
|---------|------|------|------|------|------|------|------|------|------|------|------|
| 113.45  | 3.12 | 3.05 | 3.13 | 3.16 | 3.03 | 3.12 | 3.43 | 3.46 | 3.63 | 3.78 | 4.01 |
| 121.34  | 2.84 | 2.97 | 2.90 | 2.91 | 2.97 | 3.13 | 3.02 | 3.42 | 3.61 | 3.45 | 3.78 |
| 129.86  | 2.91 | 3.02 | 2.97 | 2.92 | 2.77 | 2.92 | 3.13 | 3.21 | 3.37 | 3.50 | 3.64 |
| 139.04  | 2.94 | 3.08 | 2.84 | 2.86 | 2.96 | 2.97 | 2.98 | 3.04 | 3.24 | 3.50 | 3.59 |
| 148.94  | 2.82 | 2.67 | 2.67 | 2.65 | 2.71 | 2.58 | 3.00 | 3.09 | 3.42 | 3.46 | 3.51 |
| 159.62  | 2.67 | 2.81 | 2.81 | 2.85 | 2.97 | 2.95 | 3.26 | 3.23 | 3.41 | 3.68 | 3.97 |
| 171.14  | 2.93 | 2.86 | 3.01 | 2.78 | 3.03 | 3.22 | 3.11 | 3.35 | 3.46 | 3.37 | 3.76 |
| 183.56  | 2.80 | 2.63 | 2.66 | 2.52 | 2.93 | 2.70 | 2.97 | 2.98 | 3.43 | 3.60 | 3.52 |
| 196.96  | 2.96 | 2.95 | 2.87 | 2.85 | 2.92 | 2.89 | 3.18 | 3.46 | 3.28 | 3.70 | 3.78 |
| 211.41  | 2.72 | 2.63 | 2.71 | 2.62 | 3.00 | 2.99 | 2.98 | 3.21 | 3.13 | 3.11 | 3.66 |
| 226.99  | 2.76 | 2.80 | 2.71 | 2.92 | 2.98 | 2.88 | 3.23 | 3.31 | 3.41 | 3.25 | 3.76 |
| 243.80  | 2.62 | 2.70 | 2.47 | 2.66 | 2.70 | 2.80 | 2.89 | 2.84 | 3.13 | 3.41 | 3.45 |
| 261.93  | 2.85 | 2.79 | 2.89 | 2.94 | 2.94 | 2.67 | 3.06 | 3.02 | 3.24 | 3.52 | 3.69 |
| 281.48  | 2.86 | 2.98 | 2.84 | 2.80 | 2.80 | 2.98 | 2.98 | 3.11 | 3.36 | 3.42 | 3.57 |
| 302.56  | 2.73 | 2.63 | 2.59 | 2.54 | 2.39 | 2.81 | 2.77 | 3.01 | 3.32 | 3.12 | 3.53 |
| 325.30  | 2.55 | 2.54 | 2.47 | 2.51 | 2.73 | 2.90 | 3.11 | 2.88 | 2.92 | 3.35 | 3.50 |
| 349.83  | 2.25 | 2.43 | 2.27 | 2.43 | 2.49 | 2.53 | 2.70 | 3.05 | 2.83 | 3.06 | 3.42 |
| 376.28  | 2.43 | 2.58 | 2.47 | 2.58 | 2.52 | 2.72 | 2.90 | 3.06 | 3.18 | 3.08 | 3.56 |
| 404.81  | 2.68 | 2.79 | 2.79 | 2.73 | 2.91 | 2.88 | 3.24 | 3.01 | 3.44 | 3.38 | 3.56 |
| 435.58  | 2.60 | 2.52 | 2.61 | 2.39 | 2.64 | 2.66 | 2.69 | 2.61 | 2.95 | 3.14 | 3.39 |
| 468.76  | 2.49 | 2.40 | 2.50 | 2.56 | 2.35 | 2.43 | 2.63 | 2.76 | 2.94 | 2.85 | 3.27 |
| 504.55  | 2.46 | 2.32 | 2.27 | 2.48 | 2.42 | 2.55 | 2.62 | 2.78 | 2.97 | 2.75 | 3.23 |
| 543.15  | 2.40 | 2.32 | 2.39 | 2.25 | 2.43 | 2.36 | 2.70 | 2.71 | 3.01 | 2.95 | 3.29 |
| 584.78  | 2.14 | 2.34 | 2.35 | 2.35 | 2.31 | 2.19 | 2.59 | 2.44 | 2.87 | 2.87 | 2.96 |
| 629.68  | 2.32 | 2.20 | 2.35 | 2.45 | 2.38 | 2.49 | 2.37 | 2.66 | 2.82 | 2.88 | 3.13 |
| 678.10  | 2.38 | 2.36 | 2.42 | 2.32 | 2.44 | 2.36 | 2.72 | 2.70 | 2.75 | 3.13 | 3.39 |
| 730.33  | 2.35 | 2.43 | 2.38 | 2.55 | 2.38 | 2.67 | 2.63 | 2.81 | 3.04 | 3.10 | 3.39 |
| 786.65  | 2.29 | 2.26 | 2.42 | 2.36 | 2.31 | 2.49 | 2.67 | 2.66 | 2.75 | 3.00 | 3.13 |
| 847.40  | 2.14 | 2.14 | 2.05 | 2.21 | 2.31 | 2.31 | 2.36 | 2.35 | 2.74 | 2.73 | 3.15 |
| 912.92  | 2.26 | 2.27 | 2.03 | 2.28 | 2.12 | 2.26 | 2.33 | 2.88 | 2.76 | 2.67 | 3.21 |
| 983.58  | 2.27 | 2.08 | 2.06 | 2.24 | 2.08 | 2.37 | 2.47 | 2.57 | 2.53 | 2.99 | 3.16 |
| 1059.78 | 2.26 | 2.27 | 2.08 | 2.21 | 2.43 | 2.18 | 2.43 | 2.70 | 2.68 | 2.67 | 3.19 |
| 1141.98 | 2.05 | 1.93 | 1.89 | 1.87 | 1.84 | 2.16 | 2.03 | 2.35 | 2.36 | 2.43 | 2.99 |
| 1230.62 | 1.83 | 2.01 | 1.81 | 1.89 | 1.97 | 1.99 | 1.98 | 2.45 | 2.66 | 2.36 | 2.73 |
| 1326.23 | 2.01 | 1.97 | 2.06 | 1.97 | 2.00 | 2.18 | 2.14 | 2.47 | 2.82 | 2.64 | 3.01 |
| 1429.34 | 2.14 | 2.08 | 2.06 | 2.09 | 2.05 | 2.27 | 2.31 | 2.27 | 2.56 | 2.66 | 3.12 |
| 1540.54 | 2.15 | 1.87 | 2.00 | 2.06 | 2.07 | 2.00 | 2.31 | 2.31 | 2.42 | 2.57 | 2.94 |
| 1660.48 | 2.05 | 1.94 | 1.92 | 1.83 | 1.98 | 2.15 | 2.19 | 2.09 | 2.49 | 2.73 | 2.91 |
| 1789.83 | 1.77 | 2.00 | 1.78 | 1.68 | 1.84 | 1.96 | 2.26 | 1.98 | 2.41 | 2.28 | 2.58 |
| 1929.34 | 1.73 | 1.95 | 1.92 | 1.89 | 1.90 | 2.01 | 2.03 | 2.07 | 2.40 | 2.34 | 2.57 |
| 2079.80 | 1.74 | 1.67 | 1.74 | 1.69 | 1.59 | 1.67 | 1.76 | 1.93 | 2.22 | 2.32 | 2.34 |
| 2242.08 | 1.83 | 1.81 | 1.64 | 1.69 | 1.90 | 1.79 | 1.99 | 2.14 | 2.39 | 2.41 | 2.71 |
| 2417.10 | 1.62 | 1.58 | 1.68 | 1.76 | 1.75 | 1.75 | 1.80 | 2.10 | 2.14 | 2.32 | 2.77 |
| 2605.85 | 1.62 | 1.44 | 1.68 | 1.63 | 1.65 | 1.69 | 1.57 | 2.02 | 2.08 | 2.15 | 2.38 |
| 2809.43 | 1.63 | 1.57 | 1.75 | 1.58 | 1.48 | 1.57 | 1.92 | 2.03 | 2.05 | 1.79 | 2.23 |
| 3028.99 | 1.35 | 1.58 | 1.36 | 1.43 | 1.57 | 1.93 | 1.77 | 1.68 | 1.96 | 2.09 | 2.45 |
| 3265.79 | 1.61 | 1.67 | 1.56 | 1.61 | 1.56 | 1.62 | 1.70 | 1.69 | 1.98 | 2.11 | 2.39 |
| 3521.18 | 1.55 | 1.73 | 1.67 | 1.58 | 1.54 | 1.60 | 1.77 | 2.05 | 2.05 | 2.18 | 2.49 |
| 3796.62 | 1.46 | 1.55 | 1.52 | 1.50 | 1.52 | 1.75 | 1.61 | 2.09 | 1.77 | 1.92 | 2.23 |

| Wavelength<br>(nm)<br>Time<br>(ps) | 413.67 | 415.08 | 416.49 | 417.89 | 419.30 | 420.71 | 422.12 | 423.53 | 424.94 | 426.35 | 427.75 |
|------------------------------------|--------|--------|--------|--------|--------|--------|--------|--------|--------|--------|--------|
| -3.28                              | 0.07   | -0.11  | -0.24  | -0.03  | -0.12  | -0.15  | -0.12  | -0.08  | -0.08  | -0.18  | -0.06  |
| -2.78                              | -0.07  | -0.03  | -0.07  | -0.18  | 0.01   | -0.07  | -0.09  | 0.03   | -0.14  | -0.11  | -0.06  |
| -2.28                              | -0.14  | -0.03  | 0.07   | -0.11  | -0.16  | -0.04  | -0.08  | -0.02  | -0.04  | -0.10  | -0.07  |
| -1.78                              | 0.20   | 0.13   | 0.22   | 0.27   | 0.10   | 0.11   | 0.30   | 0.12   | 0.16   | 0.13   | 0.12   |
| -1.28                              | -0.17  | -0.09  | -0.14  | 0.06   | -0.01  | 0.05   | 0.04   | -0.10  | 0.04   | 0.03   | -0.10  |
| -0.78                              | -0.18  | -0.07  | -0.07  | -0.20  | 0.00   | -0.11  | -0.05  | -0.10  | 0.00   | -0.06  | -0.05  |
| -0.28                              | 0.00   | 0.12   | 0.06   | 0.04   | 0.01   | 0.00   | 0.00   | -0.03  | -0.03  | 0.04   | -0.04  |
| 0.22                               | 0.02   | 0.10   | 0.12   | -0.03  | 0.06   | 0.14   | 0.01   | -0.03  | 0.14   | 0.06   | 0.20   |
| 0.32                               | 0.11   | -0.06  | 0.07   | 0.13   | -0.07  | -0.05  | -0.01  | 0.06   | -0.15  | 0.07   | 0.03   |
| 0.42                               | 0.16   | 0.04   | -0.02  | 0.05   | 0.17   | 0.12   | -0.02  | 0.14   | 0.09   | 0.11   | 0.03   |
| 0.52                               | -0.11  | 0.05   | -0.08  | -0.05  | 0.02   | 0.04   | -0.08  | 0.00   | 0.03   | 0.13   | 0.08   |
| 0.62                               | 0.17   | 0.06   | 0.04   | 0.02   | 0.11   | 0.18   | 0.14   | 0.09   | 0.08   | 0.14   | -0.09  |
| 0.72                               | 0.09   | 0.22   | 0.06   | 0.12   | 0.11   | 0.17   | -0.05  | -0.02  | 0.01   | -0.02  | 0.11   |
| 0.77                               | 0.01   | 0.18   | 0.12   | 0.11   | 0.06   | 0.13   | 0.15   | 0.03   | 0.15   | 0.11   | -0.08  |
| 0.82                               | -0.04  | 0.12   | -0.13  | -0.12  | 0.10   | 0.12   | 0.01   | 0.10   | 0.15   | 0.13   | 0.09   |
| 0.87                               | 0.19   | 0.10   | -0.06  | 0.04   | 0.04   | 0.02   | 0.14   | 0.06   | -0.04  | 0.02   | -0.04  |
| 0.92                               | -0.19  | 0.02   | -0.25  | -0.16  | 0.02   | 0.02   | -0.01  | 0.03   | -0.06  | 0.07   | -0.04  |
| 0.97                               | 0.11   | 0.21   | 0.13   | 0.14   | 0.04   | 0.06   | 0.08   | 0.04   | 0.02   | -0.02  | -0.01  |
| 1.02                               | -0.09  | 0.03   | 0.05   | -0.09  | -0.15  | -0.13  | -0.02  | -0.02  | -0.05  | 0.10   | 0.10   |
| 1.07                               | 0.91   | 0.73   | 0.35   | 0.18   | -0.13  | -0.33  | -0.33  | -0.23  | -0.08  | -0.04  | -0.14  |
| 1.12                               | 4.54   | 4.21   | 3.78   | 3.38   | 2.73   | 1.97   | 1.09   | 0.45   | 0.04   | -0.20  | -0.38  |
| 1.17                               | 6.41   | 6.52   | 6.73   | 6.92   | 7.04   | 6.90   | 6.21   | 5.73   | 4.88   | 4.11   | 3.28   |
| 1.22                               | 6.37   | 6.27   | 6.70   | 6.83   | 7.07   | 7.19   | 7.13   | 6.79   | 6.68   | 6.57   | 6.13   |
| 1.27                               | 6.11   | 6.16   | 6.44   | 6.75   | 6.86   | 6.99   | 7.07   | 7.23   | 7.18   | 7.24   | 7.20   |
| 1.32                               | 5.92   | 6.09   | 6.15   | 6.42   | 6.51   | 6.38   | 6.33   | 6.47   | 6.48   | 6.47   | 6.39   |
| 1.37                               | 5.59   | 5.90   | 5.84   | 5.96   | 5.94   | 5.94   | 6.08   | 6.08   | 6.05   | 5.93   | 5.98   |
| 1.42                               | 5.46   | 5.51   | 5.66   | 5.68   | 5.85   | 5.84   | 5.88   | 5.75   | 5.82   | 5.83   | 5.84   |
| 1.47                               | 5.25   | 5.42   | 5.61   | 5.65   | 5.68   | 5.88   | 5.74   | 5.72   | 5.66   | 5.77   | 5.74   |
| 1.52                               | 5.11   | 5.35   | 5.63   | 5.52   | 5.63   | 5.59   | 5.74   | 5.60   | 5.49   | 5.59   | 5.59   |
| 1.57                               | 5.19   | 5.31   | 5.50   | 5.51   | 5.47   | 5.53   | 5.65   | 5.50   | 5.50   | 5.53   | 5.47   |
| 1.62                               | 4.93   | 5.27   | 5.49   | 5.51   | 5.63   | 5.55   | 5.61   | 5.69   | 5.60   | 5.58   | 5.59   |
| 1.67                               | 5.11   | 5.40   | 5.55   | 5.60   | 5.58   | 5.64   | 5.62   | 5.53   | 5.57   | 5.60   | 5.47   |
| 1.72                               | 4.98   | 5.27   | 5.32   | 5.49   | 5.52   | 5.51   | 5.56   | 5.57   | 5.53   | 5.56   | 5.41   |
| 1.77                               | 4.87   | 5.02   | 5.16   | 5.25   | 5.36   | 5.35   | 5.32   | 5.41   | 5.44   | 5.40   | 5.34   |
| 1.82                               | 4.67   | 4.89   | 4.93   | 5.18   | 5.08   | 5.30   | 5.16   | 5.20   | 5.10   | 5.13   | 5.18   |
| 1.87                               | 4.59   | 4.77   | 4.89   | 5.12   | 5.04   | 5.23   | 5.15   | 5.19   | 5.30   | 5.27   | 5.10   |
| 1.92                               | 4.59   | 5.09   | 5.14   | 5.31   | 5.25   | 5.31   | 5.32   | 5.38   | 5.37   | 5.38   | 5.20   |
| 1.97                               | 4.73   | 4.94   | 5.14   | 5.33   | 5.27   | 5.20   | 5.25   | 5.30   | 5.33   | 5.31   | 5.32   |
| 2.02                               | 4.56   | 4.94   | 5.04   | 5.12   | 4.97   | 5.30   | 5.20   | 5.19   | 5.17   | 5.32   | 5.05   |
| 2.07                               | 4.60   | 4.88   | 4.79   | 5.02   | 5.07   | 5.22   | 5.16   | 5.05   | 5.10   | 5.14   | 5.07   |
| 2.12                               | 4.77   | 5.14   | 5.30   | 5.30   | 5.39   | 5.56   | 5.49   | 5.57   | 5.53   | 5.59   | 5.50   |
| 2.17                               | 4.70   | 5.02   | 5.02   | 5.12   | 5.08   | 5.32   | 5.38   | 5.42   | 5.39   | 5.34   | 5.33   |
| 2.22                               | 4.62   | 4.72   | 4.92   | 4.96   | 5.09   | 5.06   | 5.14   | 5.08   | 5.06   | 5.15   | 5.02   |
| 2.27                               | 4.54   | 4.91   | 5.13   | 5.05   | 5.22   | 5.06   | 5.27   | 5.26   | 5.23   | 5.36   | 5.21   |
| 2.32                               | 4.58   | 4.51   | 4.69   | 4.99   | 4.94   | 4.99   | 5.11   | 5.08   | 5.14   | 5.12   | 4.99   |
| 2.37                               | 4.92   | 4.97   | 4.99   | 5.24   | 5.27   | 5.36   | 5.30   | 5.37   | 5.23   | 5.41   | 5.25   |
| 2.42                               | 4.59   | 4.93   | 4.83   | 5.15   | 5.14   | 5.22   | 5.30   | 5.35   | 5.23   | 5.36   | 5.21   |

|      |      |      |      |      |      |      |      |      |      |      |      |
|------|------|------|------|------|------|------|------|------|------|------|------|
| 2.47 | 4.41 | 4.39 | 4.73 | 4.83 | 4.83 | 5.04 | 5.07 | 5.02 | 5.01 | 5.18 | 4.97 |
| 2.52 | 4.51 | 4.78 | 4.74 | 5.03 | 5.18 | 5.15 | 5.13 | 5.18 | 5.25 | 5.23 | 5.09 |
| 2.57 | 4.36 | 4.52 | 4.59 | 4.88 | 4.84 | 5.05 | 4.90 | 4.99 | 5.00 | 4.94 | 5.03 |
| 2.62 | 4.42 | 4.64 | 4.67 | 4.90 | 4.94 | 5.05 | 4.88 | 5.00 | 5.07 | 5.13 | 5.17 |
| 2.67 | 4.20 | 4.34 | 4.77 | 4.68 | 4.88 | 5.01 | 4.86 | 4.93 | 4.99 | 4.94 | 5.02 |
| 2.72 | 4.45 | 4.80 | 4.80 | 4.94 | 4.99 | 5.05 | 5.15 | 5.01 | 5.09 | 5.06 | 5.08 |
| 2.77 | 4.81 | 5.01 | 5.20 | 5.35 | 5.21 | 5.35 | 5.46 | 5.39 | 5.42 | 5.39 | 5.30 |
| 2.82 | 4.34 | 4.56 | 4.92 | 4.94 | 4.88 | 5.05 | 5.07 | 5.17 | 5.07 | 5.26 | 5.16 |
| 2.87 | 4.22 | 4.53 | 4.72 | 4.73 | 4.89 | 5.02 | 4.88 | 4.93 | 4.93 | 5.16 | 4.90 |
| 2.92 | 4.40 | 4.43 | 4.73 | 4.86 | 4.97 | 5.00 | 4.95 | 5.07 | 5.09 | 5.03 | 4.99 |
| 2.97 | 4.27 | 4.69 | 4.80 | 4.90 | 4.94 | 4.93 | 4.96 | 5.07 | 5.10 | 5.05 | 5.06 |
| 3.02 | 4.67 | 4.93 | 4.94 | 5.10 | 5.10 | 5.14 | 5.27 | 5.27 | 5.32 | 5.22 | 5.23 |
| 3.07 | 4.67 | 4.73 | 4.93 | 5.14 | 5.10 | 5.11 | 5.05 | 5.05 | 5.19 | 5.20 | 5.09 |
| 3.12 | 4.68 | 4.72 | 4.88 | 5.10 | 5.19 | 5.25 | 5.30 | 5.22 | 5.31 | 5.22 | 5.22 |
| 3.17 | 4.57 | 4.73 | 4.85 | 4.99 | 5.14 | 5.16 | 5.19 | 5.26 | 5.30 | 5.39 | 5.21 |
| 3.22 | 4.54 | 4.67 | 4.67 | 4.95 | 5.10 | 5.01 | 5.07 | 5.06 | 5.03 | 5.16 | 4.96 |
| 3.27 | 4.53 | 4.74 | 4.85 | 4.99 | 5.18 | 5.09 | 5.21 | 5.18 | 5.18 | 5.40 | 5.18 |
| 3.32 | 4.84 | 4.71 | 5.08 | 5.12 | 5.12 | 5.28 | 5.48 | 5.35 | 5.37 | 5.31 | 5.26 |
| 3.37 | 4.40 | 4.69 | 4.64 | 4.74 | 4.75 | 5.01 | 4.91 | 4.89 | 4.93 | 4.95 | 4.89 |
| 3.42 | 4.66 | 4.75 | 4.87 | 5.14 | 5.23 | 5.32 | 5.26 | 5.32 | 5.34 | 5.38 | 5.29 |
| 3.47 | 4.34 | 4.49 | 4.74 | 4.90 | 4.89 | 5.16 | 5.18 | 5.21 | 5.08 | 5.14 | 5.12 |
| 3.52 | 4.30 | 4.56 | 4.76 | 4.96 | 4.94 | 4.91 | 5.12 | 5.34 | 5.12 | 5.06 | 4.99 |
| 3.57 | 4.00 | 4.62 | 4.47 | 4.84 | 4.77 | 4.96 | 4.95 | 5.16 | 5.10 | 4.97 | 5.01 |
| 3.62 | 4.40 | 4.63 | 4.72 | 4.91 | 4.95 | 5.07 | 4.98 | 5.13 | 5.15 | 5.14 | 4.91 |
| 3.67 | 4.31 | 4.51 | 4.63 | 4.77 | 4.81 | 4.97 | 4.91 | 4.97 | 5.03 | 5.13 | 4.88 |
| 3.72 | 4.52 | 4.57 | 4.79 | 4.95 | 4.92 | 4.95 | 4.97 | 4.97 | 5.04 | 5.07 | 5.06 |
| 3.92 | 4.50 | 4.55 | 4.86 | 5.04 | 5.01 | 5.22 | 5.21 | 5.13 | 5.14 | 5.11 | 5.03 |
| 4.12 | 4.47 | 4.64 | 4.71 | 5.02 | 5.03 | 5.10 | 5.12 | 5.19 | 5.06 | 5.34 | 5.19 |
| 4.32 | 4.27 | 4.48 | 4.50 | 4.74 | 4.77 | 4.76 | 4.86 | 4.90 | 5.02 | 4.93 | 4.82 |
| 4.52 | 4.48 | 4.64 | 4.84 | 5.02 | 5.06 | 5.11 | 5.12 | 5.15 | 5.14 | 5.02 | 5.01 |
| 4.72 | 4.31 | 4.55 | 4.74 | 4.71 | 4.88 | 4.96 | 5.06 | 4.89 | 4.84 | 4.98 | 4.92 |
| 4.92 | 4.43 | 4.59 | 4.80 | 5.09 | 5.08 | 5.10 | 5.11 | 5.21 | 5.25 | 5.35 | 5.04 |
| 5.12 | 4.31 | 4.56 | 4.61 | 4.83 | 4.90 | 5.08 | 5.06 | 5.03 | 5.11 | 5.12 | 5.01 |
| 5.32 | 4.62 | 4.93 | 4.98 | 5.20 | 5.20 | 5.27 | 5.32 | 5.28 | 5.28 | 5.29 | 5.18 |
| 5.52 | 4.50 | 4.84 | 4.95 | 5.08 | 5.16 | 5.17 | 5.25 | 5.22 | 5.25 | 5.29 | 5.07 |
| 5.72 | 4.59 | 4.69 | 4.90 | 5.13 | 5.27 | 5.35 | 5.28 | 5.29 | 5.34 | 5.35 | 5.30 |
| 5.92 | 4.43 | 4.52 | 4.82 | 4.86 | 4.80 | 5.06 | 5.04 | 5.21 | 5.02 | 4.97 | 5.01 |
| 6.12 | 4.40 | 4.61 | 4.79 | 4.95 | 5.15 | 5.15 | 5.09 | 5.10 | 5.21 | 5.22 | 5.03 |
| 6.32 | 4.11 | 4.36 | 4.52 | 4.78 | 4.92 | 5.06 | 5.02 | 4.92 | 4.97 | 4.94 | 4.84 |
| 6.52 | 4.53 | 4.53 | 4.70 | 5.05 | 4.94 | 5.12 | 5.12 | 4.98 | 5.24 | 5.10 | 5.06 |
| 6.72 | 4.75 | 4.86 | 5.11 | 5.19 | 5.32 | 5.41 | 5.40 | 5.33 | 5.28 | 5.41 | 5.25 |
| 6.92 | 4.49 | 4.56 | 4.73 | 4.96 | 4.89 | 5.03 | 5.09 | 4.93 | 5.05 | 5.03 | 4.96 |
| 7.12 | 4.49 | 4.78 | 4.99 | 4.86 | 4.98 | 5.16 | 5.14 | 5.07 | 5.22 | 5.11 | 4.98 |
| 7.32 | 4.38 | 4.67 | 4.90 | 5.01 | 4.97 | 5.15 | 5.13 | 5.24 | 5.22 | 5.22 | 5.03 |
| 7.52 | 4.58 | 4.58 | 4.61 | 4.92 | 4.93 | 5.01 | 5.02 | 5.07 | 4.93 | 4.91 | 4.94 |
| 7.72 | 4.51 | 4.57 | 4.91 | 5.06 | 5.16 | 5.20 | 5.20 | 5.16 | 5.18 | 5.13 | 4.94 |
| 7.92 | 4.46 | 4.74 | 4.60 | 4.85 | 4.97 | 4.89 | 5.05 | 5.08 | 5.12 | 5.10 | 4.96 |
| 8.12 | 4.50 | 4.72 | 4.90 | 5.03 | 5.18 | 5.25 | 5.17 | 5.19 | 5.24 | 5.26 | 5.09 |
| 8.32 | 4.58 | 4.62 | 4.83 | 4.95 | 5.02 | 5.10 | 5.16 | 5.05 | 5.18 | 5.16 | 5.00 |
| 8.52 | 4.12 | 4.43 | 4.46 | 4.53 | 4.62 | 4.73 | 4.83 | 4.78 | 4.80 | 4.86 | 4.73 |

|       |      |      |      |      |      |      |      |      |      |      |      |
|-------|------|------|------|------|------|------|------|------|------|------|------|
| 8.72  | 4.45 | 4.56 | 4.54 | 5.05 | 5.11 | 5.09 | 5.14 | 5.19 | 5.12 | 5.18 | 5.04 |
| 8.92  | 4.34 | 4.44 | 4.68 | 4.94 | 5.12 | 5.07 | 5.09 | 5.09 | 4.97 | 5.06 | 5.01 |
| 9.12  | 4.32 | 4.77 | 4.74 | 4.91 | 5.11 | 5.11 | 5.19 | 5.13 | 5.12 | 5.16 | 5.04 |
| 9.32  | 4.11 | 4.28 | 4.64 | 4.80 | 4.91 | 4.81 | 4.94 | 4.99 | 4.85 | 4.85 | 4.67 |
| 9.52  | 4.26 | 4.59 | 4.83 | 4.96 | 4.88 | 5.10 | 4.97 | 5.12 | 5.02 | 5.14 | 4.90 |
| 9.72  | 4.25 | 4.66 | 4.71 | 4.84 | 4.75 | 4.84 | 4.99 | 5.04 | 4.94 | 4.88 | 4.72 |
| 9.92  | 4.56 | 4.73 | 4.65 | 4.93 | 5.09 | 5.12 | 5.20 | 4.89 | 5.05 | 5.01 | 4.78 |
| 10.12 | 4.41 | 4.69 | 4.98 | 5.23 | 5.20 | 5.48 | 5.44 | 5.34 | 5.21 | 5.25 | 5.13 |
| 10.32 | 4.23 | 4.34 | 4.49 | 4.69 | 4.85 | 4.86 | 4.93 | 4.90 | 4.86 | 4.80 | 4.71 |
| 10.52 | 4.49 | 4.77 | 4.76 | 5.02 | 5.02 | 5.06 | 5.06 | 5.11 | 4.94 | 4.97 | 4.99 |
| 10.72 | 4.26 | 4.68 | 4.74 | 4.82 | 4.96 | 5.09 | 4.99 | 5.14 | 5.07 | 4.95 | 4.78 |
| 10.92 | 4.28 | 4.38 | 4.45 | 4.81 | 4.74 | 4.75 | 4.88 | 4.89 | 4.87 | 4.96 | 4.65 |
| 11.12 | 4.36 | 4.54 | 4.79 | 4.97 | 4.97 | 5.06 | 5.02 | 4.91 | 5.05 | 4.85 | 4.74 |
| 11.32 | 4.50 | 4.73 | 4.92 | 5.07 | 5.19 | 5.21 | 5.11 | 5.25 | 5.13 | 5.15 | 4.99 |
| 11.52 | 4.30 | 4.57 | 4.60 | 4.78 | 4.84 | 4.90 | 4.93 | 4.92 | 4.88 | 4.92 | 4.77 |
| 11.72 | 4.51 | 4.70 | 4.89 | 4.90 | 5.02 | 5.12 | 4.94 | 5.17 | 5.07 | 5.01 | 4.88 |
| 11.92 | 4.41 | 4.35 | 4.69 | 4.77 | 4.96 | 4.87 | 4.91 | 4.98 | 4.96 | 4.87 | 4.77 |
| 12.12 | 4.46 | 4.85 | 4.97 | 5.07 | 5.22 | 5.18 | 5.24 | 5.22 | 5.15 | 5.17 | 5.02 |
| 12.32 | 4.43 | 4.81 | 4.77 | 5.07 | 5.15 | 5.18 | 5.21 | 5.28 | 5.18 | 5.14 | 5.03 |
| 12.52 | 4.34 | 4.55 | 4.72 | 4.94 | 5.02 | 5.12 | 4.99 | 4.95 | 5.05 | 5.05 | 4.92 |
| 12.72 | 4.46 | 4.65 | 4.99 | 5.00 | 4.97 | 5.09 | 5.06 | 5.12 | 5.06 | 5.07 | 4.91 |
| 12.92 | 4.37 | 4.70 | 4.75 | 5.03 | 5.00 | 5.10 | 5.14 | 5.16 | 4.97 | 5.03 | 4.97 |
| 13.12 | 4.21 | 4.57 | 4.55 | 4.60 | 4.73 | 4.79 | 4.63 | 4.80 | 4.71 | 4.63 | 4.44 |
| 13.32 | 4.23 | 4.73 | 4.68 | 5.05 | 5.01 | 5.19 | 5.05 | 5.07 | 5.05 | 5.22 | 4.83 |
| 13.52 | 4.25 | 4.43 | 4.68 | 4.76 | 4.78 | 4.84 | 4.72 | 4.80 | 4.90 | 4.77 | 4.72 |
| 13.72 | 4.52 | 4.73 | 4.93 | 5.19 | 5.12 | 5.23 | 5.29 | 5.18 | 5.25 | 5.16 | 5.04 |
| 13.92 | 4.31 | 4.69 | 4.73 | 4.94 | 4.99 | 5.01 | 5.06 | 5.03 | 4.97 | 5.02 | 4.84 |
| 14.00 | 4.61 | 4.83 | 4.90 | 5.05 | 5.19 | 5.25 | 5.27 | 5.30 | 5.22 | 5.10 | 5.07 |
| 14.08 | 4.48 | 4.62 | 4.75 | 4.89 | 4.77 | 4.94 | 4.88 | 4.94 | 4.84 | 4.92 | 4.89 |
| 14.17 | 4.09 | 4.31 | 4.63 | 4.85 | 4.81 | 5.05 | 5.07 | 4.96 | 4.86 | 4.99 | 4.69 |
| 14.27 | 4.25 | 4.57 | 4.70 | 4.78 | 4.94 | 5.00 | 4.98 | 5.02 | 4.98 | 4.89 | 4.77 |
| 14.38 | 4.19 | 4.43 | 4.64 | 4.79 | 4.88 | 5.06 | 4.98 | 4.97 | 4.95 | 4.89 | 4.78 |
| 14.49 | 4.33 | 4.40 | 4.67 | 4.91 | 4.86 | 4.89 | 4.87 | 4.84 | 4.98 | 4.89 | 4.80 |
| 14.61 | 4.29 | 4.40 | 4.54 | 4.88 | 4.86 | 4.79 | 4.85 | 4.82 | 4.85 | 4.86 | 4.85 |
| 14.75 | 4.25 | 4.30 | 4.52 | 4.66 | 4.78 | 4.81 | 4.81 | 4.89 | 4.76 | 4.86 | 4.55 |
| 14.89 | 4.78 | 5.07 | 5.19 | 5.31 | 5.36 | 5.49 | 5.38 | 5.28 | 5.27 | 5.31 | 5.14 |
| 15.05 | 4.34 | 4.45 | 4.63 | 5.02 | 5.06 | 5.01 | 4.93 | 4.95 | 4.98 | 5.13 | 4.85 |
| 15.21 | 4.60 | 4.75 | 4.85 | 5.01 | 5.22 | 5.29 | 5.05 | 5.10 | 5.19 | 5.09 | 4.97 |
| 15.39 | 4.35 | 4.62 | 4.74 | 4.83 | 4.92 | 4.93 | 4.94 | 4.88 | 4.88 | 4.85 | 4.79 |
| 15.59 | 4.36 | 4.45 | 4.62 | 4.83 | 4.88 | 4.94 | 4.91 | 4.91 | 4.90 | 4.92 | 4.71 |
| 15.80 | 4.45 | 4.75 | 4.93 | 5.08 | 5.20 | 5.29 | 5.10 | 5.07 | 5.06 | 5.03 | 4.91 |
| 16.02 | 4.18 | 4.36 | 4.67 | 4.74 | 4.78 | 4.83 | 5.00 | 4.77 | 4.88 | 4.85 | 4.64 |
| 16.27 | 4.61 | 4.80 | 4.83 | 5.11 | 5.12 | 5.17 | 5.28 | 5.14 | 5.06 | 5.24 | 5.08 |
| 16.53 | 4.30 | 4.52 | 4.68 | 4.80 | 4.92 | 4.98 | 5.03 | 5.04 | 4.96 | 4.89 | 4.82 |
| 16.81 | 4.08 | 4.45 | 4.55 | 4.73 | 4.75 | 4.78 | 4.80 | 4.82 | 4.84 | 4.64 | 4.64 |
| 17.12 | 4.48 | 4.71 | 4.78 | 4.96 | 4.98 | 5.02 | 5.04 | 5.13 | 5.08 | 5.08 | 4.80 |
| 17.45 | 3.96 | 4.25 | 4.56 | 4.69 | 4.64 | 4.77 | 4.74 | 4.63 | 4.76 | 4.85 | 4.57 |
| 17.81 | 4.43 | 4.83 | 4.96 | 5.15 | 5.16 | 5.34 | 5.27 | 5.21 | 5.13 | 4.99 | 4.96 |
| 18.19 | 4.47 | 4.75 | 4.83 | 4.95 | 5.15 | 5.18 | 5.24 | 5.02 | 5.12 | 5.12 | 4.93 |
| 18.60 | 4.61 | 4.84 | 5.02 | 5.18 | 5.30 | 5.36 | 5.34 | 5.20 | 5.21 | 5.06 | 5.05 |

|        |      |      |      |      |      |      |      |      |      |      |      |
|--------|------|------|------|------|------|------|------|------|------|------|------|
| 19.05  | 4.46 | 4.78 | 4.88 | 5.05 | 5.20 | 5.10 | 5.00 | 5.04 | 4.95 | 4.88 | 4.88 |
| 19.53  | 4.39 | 4.70 | 4.76 | 4.92 | 5.01 | 5.01 | 5.02 | 4.93 | 4.94 | 4.93 | 4.78 |
| 20.05  | 4.42 | 4.65 | 4.77 | 5.03 | 5.06 | 5.09 | 5.03 | 5.08 | 4.94 | 5.01 | 4.89 |
| 20.61  | 4.56 | 4.70 | 4.74 | 5.00 | 5.20 | 5.04 | 5.18 | 5.10 | 5.12 | 4.95 | 4.93 |
| 21.22  | 4.46 | 4.56 | 4.72 | 4.81 | 4.96 | 4.99 | 5.05 | 5.04 | 4.93 | 4.91 | 4.85 |
| 21.87  | 4.44 | 4.76 | 4.89 | 5.02 | 5.07 | 5.11 | 5.09 | 4.90 | 4.88 | 5.07 | 4.70 |
| 22.57  | 4.44 | 4.76 | 4.93 | 5.10 | 5.02 | 5.05 | 5.05 | 5.13 | 5.00 | 5.07 | 4.83 |
| 23.33  | 4.46 | 4.59 | 4.77 | 5.05 | 5.13 | 5.02 | 5.14 | 5.14 | 5.10 | 5.14 | 4.85 |
| 24.15  | 4.41 | 4.60 | 4.53 | 4.91 | 4.97 | 4.95 | 4.98 | 4.87 | 4.86 | 4.76 | 4.80 |
| 25.03  | 4.26 | 4.29 | 4.60 | 4.82 | 4.87 | 4.98 | 4.93 | 4.85 | 4.87 | 4.69 | 4.74 |
| 25.98  | 4.37 | 4.72 | 4.88 | 5.10 | 5.06 | 5.12 | 5.16 | 5.16 | 4.99 | 4.98 | 4.90 |
| 27.01  | 4.45 | 4.53 | 4.64 | 4.80 | 4.95 | 5.00 | 5.10 | 5.04 | 4.90 | 4.87 | 4.77 |
| 28.11  | 4.44 | 4.68 | 4.77 | 5.11 | 4.95 | 5.16 | 5.17 | 5.17 | 4.97 | 4.94 | 4.66 |
| 29.30  | 4.43 | 4.48 | 4.76 | 5.00 | 4.95 | 4.98 | 5.03 | 4.99 | 4.84 | 4.83 | 4.64 |
| 30.59  | 4.27 | 4.57 | 4.66 | 5.06 | 5.06 | 5.06 | 4.99 | 4.95 | 4.91 | 4.86 | 4.73 |
| 31.98  | 4.35 | 4.46 | 4.67 | 4.75 | 4.86 | 4.91 | 4.85 | 4.84 | 4.90 | 4.79 | 4.63 |
| 33.47  | 4.14 | 4.56 | 4.62 | 4.97 | 4.88 | 4.95 | 4.85 | 4.90 | 4.92 | 4.85 | 4.64 |
| 35.09  | 4.43 | 4.48 | 4.79 | 5.01 | 4.99 | 5.12 | 5.15 | 5.11 | 4.97 | 4.89 | 4.70 |
| 36.83  | 4.22 | 4.52 | 4.55 | 4.80 | 4.86 | 4.83 | 4.86 | 4.87 | 4.83 | 4.68 | 4.53 |
| 38.71  | 4.21 | 4.32 | 4.74 | 4.83 | 4.90 | 4.76 | 4.71 | 4.73 | 4.72 | 4.65 | 4.58 |
| 40.73  | 4.40 | 4.67 | 4.66 | 4.88 | 5.02 | 5.05 | 5.07 | 4.99 | 4.87 | 4.97 | 4.76 |
| 42.92  | 4.22 | 4.62 | 4.55 | 4.81 | 4.80 | 4.99 | 4.92 | 4.90 | 4.90 | 4.78 | 4.64 |
| 45.27  | 4.29 | 4.67 | 4.83 | 4.95 | 4.90 | 5.06 | 4.93 | 4.94 | 4.80 | 4.74 | 4.66 |
| 47.81  | 4.32 | 4.58 | 4.85 | 5.03 | 4.98 | 5.01 | 4.85 | 4.95 | 4.78 | 4.74 | 4.77 |
| 50.55  | 3.91 | 4.12 | 4.46 | 4.46 | 4.62 | 4.62 | 4.63 | 4.38 | 4.40 | 4.48 | 4.21 |
| 53.51  | 4.46 | 4.65 | 4.77 | 4.88 | 5.03 | 4.99 | 4.94 | 4.92 | 4.79 | 4.85 | 4.64 |
| 56.69  | 4.55 | 4.58 | 4.95 | 5.05 | 4.91 | 4.98 | 5.09 | 4.80 | 4.79 | 4.71 | 4.63 |
| 60.13  | 4.29 | 4.53 | 4.74 | 4.95 | 4.75 | 4.79 | 4.91 | 4.69 | 4.74 | 4.67 | 4.38 |
| 63.84  | 4.35 | 4.69 | 4.77 | 4.85 | 5.02 | 5.08 | 5.06 | 4.95 | 4.68 | 4.73 | 4.64 |
| 67.83  | 4.29 | 4.50 | 4.67 | 4.92 | 4.88 | 4.86 | 4.71 | 4.71 | 4.77 | 4.66 | 4.33 |
| 72.15  | 4.31 | 4.51 | 4.51 | 4.78 | 4.73 | 4.77 | 4.80 | 4.74 | 4.73 | 4.58 | 4.43 |
| 76.80  | 4.08 | 4.38 | 4.68 | 4.72 | 4.75 | 4.85 | 4.74 | 4.78 | 4.65 | 4.55 | 4.41 |
| 81.81  | 4.13 | 4.59 | 4.62 | 4.86 | 4.92 | 5.04 | 4.97 | 4.76 | 4.87 | 4.78 | 4.57 |
| 87.22  | 3.95 | 4.21 | 4.43 | 4.57 | 4.72 | 4.77 | 4.70 | 4.63 | 4.61 | 4.53 | 4.29 |
| 93.06  | 4.00 | 4.35 | 4.39 | 4.61 | 4.85 | 4.76 | 4.76 | 4.56 | 4.72 | 4.57 | 4.49 |
| 99.35  | 4.32 | 4.50 | 4.53 | 4.76 | 4.83 | 4.86 | 4.90 | 4.73 | 4.68 | 4.78 | 4.49 |
| 106.13 | 4.18 | 4.41 | 4.48 | 4.75 | 4.71 | 4.78 | 4.62 | 4.68 | 4.72 | 4.43 | 4.30 |
| 113.45 | 4.39 | 4.54 | 4.83 | 4.90 | 4.88 | 5.04 | 4.98 | 4.95 | 4.88 | 4.73 | 4.51 |
| 121.34 | 4.19 | 4.25 | 4.53 | 4.61 | 4.73 | 4.81 | 4.82 | 4.68 | 4.56 | 4.54 | 4.34 |
| 129.86 | 3.92 | 4.07 | 4.28 | 4.52 | 4.59 | 4.53 | 4.56 | 4.39 | 4.40 | 4.35 | 4.07 |
| 139.04 | 3.95 | 4.19 | 4.30 | 4.53 | 4.60 | 4.58 | 4.52 | 4.54 | 4.61 | 4.32 | 4.25 |
| 148.94 | 3.85 | 4.08 | 4.35 | 4.35 | 4.38 | 4.42 | 4.43 | 4.36 | 4.22 | 4.30 | 4.01 |
| 159.62 | 3.91 | 4.21 | 4.34 | 4.62 | 4.42 | 4.61 | 4.53 | 4.64 | 4.33 | 4.39 | 4.23 |
| 171.14 | 4.07 | 4.30 | 4.43 | 4.62 | 4.68 | 4.67 | 4.72 | 4.62 | 4.56 | 4.51 | 4.31 |
| 183.56 | 3.74 | 4.06 | 4.24 | 4.32 | 4.26 | 4.32 | 4.40 | 4.20 | 4.29 | 4.23 | 4.08 |
| 196.96 | 4.03 | 4.29 | 4.50 | 4.63 | 4.61 | 4.78 | 4.87 | 4.54 | 4.56 | 4.44 | 4.26 |
| 211.41 | 4.00 | 4.13 | 4.32 | 4.54 | 4.54 | 4.50 | 4.58 | 4.54 | 4.31 | 4.40 | 4.18 |
| 226.99 | 3.89 | 4.17 | 4.33 | 4.70 | 4.49 | 4.55 | 4.47 | 4.55 | 4.53 | 4.46 | 4.21 |
| 243.80 | 3.70 | 3.90 | 4.05 | 4.28 | 4.33 | 4.32 | 4.21 | 4.06 | 4.18 | 4.15 | 3.89 |
| 261.93 | 3.99 | 4.18 | 4.43 | 4.60 | 4.47 | 4.57 | 4.56 | 4.60 | 4.48 | 4.42 | 4.14 |



|         |      |      |      |      |      |      |      |      |      |      |      |
|---------|------|------|------|------|------|------|------|------|------|------|------|
| 281.48  | 4.10 | 4.22 | 4.40 | 4.59 | 4.47 | 4.67 | 4.60 | 4.46 | 4.42 | 4.28 | 4.13 |
| 302.56  | 3.79 | 3.87 | 3.98 | 4.11 | 4.39 | 4.20 | 4.21 | 4.26 | 4.17 | 4.04 | 3.92 |
| 325.30  | 3.61 | 4.00 | 4.07 | 4.45 | 4.39 | 4.43 | 4.45 | 4.38 | 4.20 | 4.31 | 4.04 |
| 349.83  | 3.48 | 3.79 | 3.87 | 4.14 | 4.24 | 4.23 | 4.15 | 4.27 | 4.13 | 4.05 | 3.84 |
| 376.28  | 3.79 | 4.04 | 4.05 | 4.35 | 4.24 | 4.31 | 4.36 | 4.24 | 4.12 | 4.08 | 3.98 |
| 404.81  | 3.88 | 4.11 | 4.26 | 4.46 | 4.53 | 4.32 | 4.37 | 4.25 | 4.15 | 4.17 | 3.93 |
| 435.58  | 3.66 | 3.71 | 4.03 | 4.18 | 4.31 | 4.22 | 4.24 | 4.18 | 4.13 | 4.12 | 3.83 |
| 468.76  | 3.76 | 3.78 | 3.87 | 4.12 | 4.23 | 4.05 | 4.21 | 4.12 | 3.98 | 3.96 | 3.81 |
| 504.55  | 3.45 | 3.67 | 3.66 | 3.93 | 3.89 | 4.03 | 3.93 | 4.03 | 3.76 | 3.86 | 3.66 |
| 543.15  | 3.54 | 3.75 | 4.00 | 4.20 | 4.19 | 4.05 | 4.07 | 3.97 | 4.01 | 3.79 | 3.48 |
| 584.78  | 3.27 | 3.60 | 3.81 | 3.88 | 3.80 | 4.01 | 3.89 | 3.67 | 3.81 | 3.66 | 3.49 |
| 629.68  | 3.38 | 3.56 | 3.63 | 3.88 | 3.93 | 4.01 | 3.85 | 3.86 | 3.76 | 3.68 | 3.61 |
| 678.10  | 3.53 | 3.74 | 3.91 | 4.03 | 4.08 | 4.19 | 4.05 | 4.06 | 3.89 | 3.82 | 3.64 |
| 730.33  | 3.59 | 3.90 | 3.89 | 4.15 | 4.12 | 4.14 | 4.08 | 4.03 | 3.98 | 3.97 | 3.83 |
| 786.65  | 3.38 | 3.66 | 3.66 | 3.89 | 3.89 | 3.86 | 3.89 | 3.73 | 3.68 | 3.63 | 3.51 |
| 847.40  | 3.31 | 3.56 | 3.72 | 3.83 | 3.83 | 4.00 | 3.89 | 3.71 | 3.77 | 3.61 | 3.43 |
| 912.92  | 3.30 | 3.61 | 3.80 | 3.98 | 4.08 | 3.96 | 3.98 | 3.87 | 3.83 | 3.60 | 3.55 |
| 983.58  | 3.27 | 3.67 | 3.89 | 4.11 | 4.08 | 4.05 | 3.93 | 3.88 | 3.71 | 3.84 | 3.60 |
| 1059.78 | 3.22 | 3.40 | 3.78 | 3.91 | 3.99 | 3.87 | 3.85 | 3.91 | 3.63 | 3.76 | 3.54 |
| 1141.98 | 3.16 | 3.29 | 3.38 | 3.78 | 3.66 | 3.53 | 3.61 | 3.61 | 3.51 | 3.50 | 3.26 |
| 1230.62 | 3.22 | 3.30 | 3.25 | 3.50 | 3.67 | 3.54 | 3.43 | 3.49 | 3.26 | 3.28 | 3.08 |
| 1326.23 | 3.16 | 3.54 | 3.53 | 3.74 | 3.85 | 3.79 | 3.62 | 3.67 | 3.55 | 3.37 | 3.39 |
| 1429.34 | 3.37 | 3.39 | 3.66 | 3.76 | 3.82 | 3.95 | 3.83 | 3.82 | 3.79 | 3.70 | 3.33 |
| 1540.54 | 3.14 | 3.26 | 3.48 | 3.67 | 3.74 | 3.81 | 3.74 | 3.57 | 3.49 | 3.43 | 3.38 |
| 1660.48 | 2.90 | 3.36 | 3.41 | 3.68 | 3.66 | 3.81 | 3.69 | 3.58 | 3.46 | 3.41 | 3.21 |
| 1789.83 | 2.90 | 3.16 | 3.38 | 3.44 | 3.48 | 3.72 | 3.54 | 3.26 | 3.39 | 3.38 | 3.17 |
| 1929.34 | 3.12 | 3.25 | 3.28 | 3.58 | 3.47 | 3.59 | 3.58 | 3.43 | 3.55 | 3.42 | 3.17 |
| 2079.80 | 2.82 | 3.24 | 3.28 | 3.41 | 3.48 | 3.53 | 3.45 | 3.48 | 3.39 | 3.18 | 3.00 |
| 2242.08 | 2.80 | 2.99 | 3.23 | 3.52 | 3.48 | 3.40 | 3.45 | 3.36 | 3.18 | 3.14 | 3.02 |
| 2417.10 | 2.83 | 3.14 | 3.18 | 3.52 | 3.37 | 3.59 | 3.40 | 3.37 | 3.35 | 3.21 | 2.95 |
| 2605.85 | 2.76 | 3.13 | 3.24 | 3.36 | 3.43 | 3.55 | 3.34 | 3.36 | 3.21 | 3.23 | 2.87 |
| 2809.43 | 2.52 | 2.73 | 2.92 | 3.06 | 3.07 | 3.10 | 2.97 | 2.98 | 2.80 | 2.90 | 2.68 |
| 3028.99 | 2.50 | 2.87 | 3.02 | 3.12 | 3.28 | 3.13 | 3.22 | 3.07 | 3.03 | 2.96 | 2.82 |
| 3265.79 | 2.65 | 2.84 | 2.88 | 3.12 | 3.17 | 3.25 | 3.19 | 3.04 | 3.02 | 3.02 | 2.81 |
| 3521.18 | 2.65 | 2.96 | 3.10 | 3.23 | 3.38 | 3.20 | 3.25 | 3.09 | 3.05 | 3.07 | 2.91 |
| 3796.62 | 2.61 | 2.70 | 2.85 | 2.98 | 2.99 | 3.10 | 3.02 | 2.85 | 2.78 | 2.86 | 2.45 |

| Wavelength (nm) \ Time (ps) | 429.16 | 430.57 | 431.98 | 433.39 | 434.80 | 436.20 | 437.61 | 439.02 | 440.43 | 441.84 | 443.25 |
|-----------------------------|--------|--------|--------|--------|--------|--------|--------|--------|--------|--------|--------|
| -3.28                       | -0.18  | -0.08  | -0.12  | -0.24  | -0.16  | -0.05  | -0.16  | -0.07  | -0.19  | -0.13  | -0.02  |
| -2.78                       | -0.13  | -0.09  | -0.14  | -0.05  | -0.13  | -0.06  | -0.01  | -0.09  | -0.18  | -0.08  | -0.02  |
| -2.28                       | -0.03  | -0.01  | 0.03   | -0.02  | 0.02   | -0.02  | -0.13  | -0.07  | 0.03   | 0.02   | -0.01  |
| -1.78                       | 0.10   | 0.15   | 0.07   | 0.20   | 0.03   | 0.16   | 0.12   | 0.07   | 0.17   | 0.03   | 0.05   |
| -1.28                       | -0.03  | 0.00   | 0.01   | 0.08   | 0.01   | -0.02  | -0.02  | 0.04   | -0.05  | 0.07   | 0.03   |
| -0.78                       | -0.12  | -0.02  | -0.12  | -0.07  | 0.02   | 0.03   | -0.10  | -0.13  | -0.12  | -0.12  | -0.06  |
| -0.28                       | 0.01   | -0.10  | -0.06  | -0.04  | 0.02   | -0.05  | -0.07  | 0.02   | -0.01  | 0.01   | -0.02  |
| 0.22                        | 0.12   | 0.07   | 0.25   | 0.07   | 0.20   | -0.03  | 0.17   | 0.07   | 0.14   | 0.17   | 0.03   |
| 0.32                        | 0.01   | -0.03  | 0.04   | -0.10  | -0.04  | 0.05   | 0.03   | -0.01  | 0.00   | -0.04  | -0.02  |
| 0.42                        | 0.25   | 0.11   | 0.05   | 0.17   | 0.01   | -0.01  | 0.18   | 0.17   | 0.21   | 0.07   | 0.04   |

|      |       |       |       |       |       |       |       |       |       |       |       |
|------|-------|-------|-------|-------|-------|-------|-------|-------|-------|-------|-------|
| 0.52 | 0.05  | 0.02  | -0.01 | 0.05  | 0.06  | -0.06 | -0.05 | -0.10 | -0.01 | 0.00  | -0.05 |
| 0.62 | 0.04  | 0.01  | 0.10  | 0.09  | -0.09 | -0.02 | 0.03  | -0.06 | 0.08  | 0.03  | -0.02 |
| 0.72 | 0.06  | 0.09  | 0.25  | 0.17  | 0.20  | 0.27  | 0.20  | 0.02  | 0.18  | 0.23  | 0.22  |
| 0.77 | 0.10  | 0.02  | 0.01  | 0.14  | 0.06  | 0.04  | -0.01 | 0.14  | -0.02 | -0.02 | 0.02  |
| 0.82 | 0.12  | 0.12  | 0.00  | 0.01  | 0.02  | 0.00  | -0.09 | -0.01 | 0.02  | 0.04  | 0.19  |
| 0.87 | 0.01  | 0.02  | 0.12  | 0.02  | -0.02 | -0.08 | -0.06 | -0.03 | -0.04 | 0.04  | -0.03 |
| 0.92 | 0.09  | 0.06  | -0.01 | 0.04  | 0.08  | 0.11  | -0.06 | 0.06  | 0.09  | -0.01 | -0.19 |
| 0.97 | 0.01  | -0.11 | 0.11  | 0.00  | 0.00  | -0.13 | -0.18 | -0.04 | -0.05 | -0.02 | -0.03 |
| 1.02 | 0.04  | -0.05 | -0.01 | -0.10 | -0.11 | -0.12 | -0.02 | -0.11 | -0.08 | -0.09 | -0.03 |
| 1.07 | 0.02  | -0.05 | -0.04 | -0.01 | -0.11 | -0.01 | -0.05 | -0.06 | -0.10 | 0.07  | 0.01  |
| 1.12 | -0.39 | -0.51 | -0.45 | -0.48 | -0.32 | -0.26 | -0.21 | -0.22 | -0.25 | -0.09 | -0.22 |
| 1.17 | 2.51  | 1.72  | 1.26  | 0.51  | 0.24  | -0.17 | -0.28 | -0.44 | -0.41 | -0.47 | -0.33 |
| 1.22 | 6.01  | 5.59  | 5.38  | 4.96  | 4.50  | 4.22  | 3.64  | 3.19  | 2.61  | 2.41  | 1.76  |
| 1.27 | 7.37  | 7.26  | 7.32  | 7.20  | 7.09  | 6.96  | 6.76  | 6.54  | 6.30  | 6.01  | 5.63  |
| 1.32 | 6.38  | 6.57  | 6.49  | 6.39  | 6.35  | 6.49  | 6.43  | 6.44  | 6.43  | 6.51  | 6.29  |
| 1.37 | 5.88  | 5.94  | 5.83  | 5.72  | 5.74  | 5.72  | 5.62  | 5.46  | 5.38  | 5.31  | 5.20  |
| 1.42 | 5.86  | 5.67  | 5.75  | 5.75  | 5.67  | 5.48  | 5.33  | 5.27  | 5.19  | 5.14  | 5.13  |
| 1.47 | 5.68  | 5.57  | 5.58  | 5.44  | 5.30  | 5.21  | 5.23  | 5.05  | 4.92  | 4.83  | 4.81  |
| 1.52 | 5.52  | 5.45  | 5.37  | 5.15  | 5.13  | 5.04  | 4.90  | 4.84  | 4.67  | 4.59  | 4.45  |
| 1.57 | 5.41  | 5.29  | 5.17  | 5.20  | 5.16  | 4.94  | 4.87  | 4.70  | 4.65  | 4.58  | 4.44  |
| 1.62 | 5.52  | 5.52  | 5.41  | 5.23  | 5.13  | 5.01  | 4.95  | 4.83  | 4.69  | 4.55  | 4.39  |
| 1.67 | 5.46  | 5.43  | 5.38  | 5.20  | 5.14  | 5.12  | 4.89  | 4.81  | 4.72  | 4.67  | 4.47  |
| 1.72 | 5.29  | 5.34  | 5.24  | 5.17  | 5.11  | 4.93  | 4.79  | 4.71  | 4.64  | 4.41  | 4.37  |
| 1.77 | 5.32  | 5.39  | 5.19  | 5.17  | 5.03  | 4.85  | 4.87  | 4.56  | 4.56  | 4.29  | 4.17  |
| 1.82 | 5.12  | 5.03  | 5.05  | 4.84  | 4.92  | 4.81  | 4.62  | 4.50  | 4.43  | 4.12  | 4.08  |
| 1.87 | 5.14  | 5.03  | 5.05  | 4.90  | 4.80  | 4.73  | 4.65  | 4.49  | 4.42  | 4.27  | 4.07  |
| 1.92 | 5.20  | 5.22  | 5.28  | 4.96  | 4.93  | 4.72  | 4.80  | 4.48  | 4.48  | 4.23  | 4.12  |
| 1.97 | 5.10  | 5.13  | 5.08  | 4.98  | 4.76  | 4.73  | 4.69  | 4.54  | 4.25  | 4.13  | 4.17  |
| 2.02 | 5.22  | 5.15  | 4.99  | 4.88  | 4.94  | 4.88  | 4.58  | 4.38  | 4.29  | 4.37  | 4.06  |
| 2.07 | 5.02  | 4.87  | 4.88  | 4.80  | 4.79  | 4.59  | 4.32  | 4.24  | 4.17  | 3.95  | 4.04  |
| 2.12 | 5.40  | 5.36  | 5.31  | 5.13  | 5.21  | 5.02  | 4.78  | 4.74  | 4.62  | 4.36  | 4.31  |
| 2.17 | 5.34  | 5.13  | 5.05  | 4.89  | 5.00  | 4.78  | 4.66  | 4.43  | 4.42  | 4.37  | 4.15  |
| 2.22 | 5.11  | 4.98  | 4.81  | 4.73  | 4.72  | 4.64  | 4.47  | 4.29  | 4.22  | 3.97  | 4.01  |
| 2.27 | 5.15  | 5.17  | 5.05  | 4.90  | 4.88  | 4.85  | 4.70  | 4.56  | 4.38  | 4.30  | 4.20  |
| 2.32 | 5.04  | 5.02  | 5.02  | 4.80  | 4.73  | 4.52  | 4.51  | 4.42  | 4.23  | 4.05  | 4.02  |
| 2.37 | 5.31  | 5.18  | 5.04  | 4.99  | 4.84  | 4.68  | 4.59  | 4.46  | 4.35  | 4.18  | 4.17  |
| 2.42 | 5.17  | 5.04  | 5.11  | 5.07  | 5.00  | 4.83  | 4.48  | 4.46  | 4.28  | 4.15  | 4.07  |
| 2.47 | 4.99  | 4.93  | 4.79  | 4.68  | 4.56  | 4.45  | 4.28  | 4.16  | 4.02  | 4.03  | 3.79  |
| 2.52 | 5.09  | 4.97  | 4.97  | 4.80  | 4.67  | 4.56  | 4.50  | 4.19  | 4.21  | 3.98  | 3.94  |
| 2.57 | 4.91  | 4.85  | 4.75  | 4.62  | 4.58  | 4.34  | 4.26  | 4.08  | 4.00  | 3.82  | 3.68  |
| 2.62 | 5.06  | 4.88  | 4.89  | 4.76  | 4.75  | 4.44  | 4.46  | 4.27  | 4.27  | 4.02  | 3.87  |
| 2.67 | 4.96  | 4.82  | 4.71  | 4.54  | 4.61  | 4.35  | 4.26  | 4.01  | 4.07  | 3.79  | 3.66  |
| 2.72 | 4.82  | 4.84  | 4.81  | 4.68  | 4.55  | 4.42  | 4.38  | 4.21  | 4.07  | 4.07  | 3.78  |
| 2.77 | 5.29  | 5.24  | 5.26  | 5.03  | 4.85  | 4.67  | 4.56  | 4.45  | 4.29  | 4.23  | 4.14  |
| 2.82 | 5.13  | 4.95  | 4.97  | 4.85  | 4.60  | 4.47  | 4.45  | 4.34  | 4.06  | 3.98  | 3.87  |
| 2.87 | 4.97  | 5.00  | 4.73  | 4.69  | 4.58  | 4.47  | 4.31  | 4.08  | 4.01  | 3.92  | 3.72  |
| 2.92 | 5.03  | 4.79  | 4.98  | 4.74  | 4.63  | 4.58  | 4.30  | 4.13  | 4.16  | 4.08  | 3.87  |
| 2.97 | 4.97  | 4.88  | 4.78  | 4.74  | 4.68  | 4.53  | 4.36  | 4.23  | 3.94  | 3.94  | 3.77  |
| 3.02 | 5.13  | 5.08  | 5.04  | 4.76  | 4.72  | 4.63  | 4.49  | 4.33  | 4.16  | 4.06  | 3.90  |
| 3.07 | 5.03  | 5.05  | 4.99  | 4.75  | 4.66  | 4.54  | 4.48  | 4.21  | 4.05  | 4.11  | 3.89  |

|       |      |      |      |      |      |      |      |      |      |      |      |
|-------|------|------|------|------|------|------|------|------|------|------|------|
| 3.12  | 5.17 | 5.16 | 5.00 | 4.94 | 4.83 | 4.74 | 4.66 | 4.37 | 4.35 | 4.19 | 4.00 |
| 3.17  | 5.23 | 5.12 | 5.05 | 4.91 | 4.79 | 4.61 | 4.48 | 4.25 | 4.19 | 4.03 | 3.85 |
| 3.22  | 5.14 | 4.99 | 4.97 | 4.74 | 4.70 | 4.44 | 4.17 | 4.22 | 4.07 | 4.02 | 3.86 |
| 3.27  | 5.02 | 5.00 | 4.86 | 4.87 | 4.72 | 4.62 | 4.43 | 4.40 | 4.15 | 4.01 | 3.92 |
| 3.32  | 5.27 | 5.11 | 5.08 | 5.08 | 4.80 | 4.83 | 4.58 | 4.42 | 4.17 | 4.28 | 3.98 |
| 3.37  | 4.71 | 4.73 | 4.67 | 4.58 | 4.46 | 4.36 | 4.03 | 3.96 | 3.94 | 3.80 | 3.74 |
| 3.42  | 5.26 | 5.03 | 5.13 | 5.02 | 4.80 | 4.73 | 4.43 | 4.31 | 4.15 | 4.08 | 3.86 |
| 3.47  | 4.98 | 4.95 | 4.99 | 4.70 | 4.65 | 4.49 | 4.33 | 4.28 | 4.05 | 3.94 | 3.87 |
| 3.52  | 5.12 | 4.94 | 4.93 | 4.95 | 4.73 | 4.52 | 4.41 | 4.24 | 4.18 | 3.97 | 3.83 |
| 3.57  | 4.94 | 4.81 | 4.86 | 4.74 | 4.44 | 4.49 | 4.25 | 4.06 | 3.94 | 3.93 | 3.76 |
| 3.62  | 5.03 | 5.00 | 4.89 | 4.78 | 4.71 | 4.45 | 4.21 | 4.21 | 4.04 | 3.83 | 3.73 |
| 3.67  | 4.78 | 4.76 | 4.74 | 4.59 | 4.52 | 4.20 | 4.20 | 3.96 | 3.88 | 3.72 | 3.55 |
| 3.72  | 5.07 | 4.92 | 4.92 | 4.81 | 4.56 | 4.48 | 4.16 | 4.21 | 4.04 | 3.89 | 3.80 |
| 3.92  | 5.12 | 4.99 | 4.84 | 4.76 | 4.74 | 4.55 | 4.33 | 4.28 | 4.02 | 3.91 | 3.70 |
| 4.12  | 4.90 | 4.93 | 4.88 | 4.66 | 4.68 | 4.59 | 4.35 | 4.22 | 4.06 | 3.93 | 3.68 |
| 4.32  | 4.86 | 4.73 | 4.71 | 4.52 | 4.36 | 4.26 | 4.11 | 3.98 | 3.85 | 3.80 | 3.58 |
| 4.52  | 4.91 | 4.89 | 4.80 | 4.58 | 4.42 | 4.46 | 4.19 | 4.03 | 3.87 | 3.72 | 3.68 |
| 4.72  | 4.97 | 4.83 | 4.71 | 4.59 | 4.49 | 4.41 | 4.20 | 3.94 | 3.97 | 3.70 | 3.48 |
| 4.92  | 5.19 | 5.08 | 5.05 | 4.82 | 4.65 | 4.44 | 4.33 | 4.19 | 4.04 | 3.88 | 3.73 |
| 5.12  | 4.94 | 4.88 | 4.80 | 4.76 | 4.54 | 4.45 | 4.18 | 3.96 | 3.84 | 3.74 | 3.58 |
| 5.32  | 5.14 | 5.01 | 4.85 | 4.72 | 4.56 | 4.53 | 4.23 | 4.20 | 3.99 | 3.77 | 3.83 |
| 5.52  | 5.05 | 4.98 | 4.80 | 4.79 | 4.52 | 4.47 | 4.30 | 4.08 | 4.03 | 3.92 | 3.52 |
| 5.72  | 5.28 | 5.09 | 5.08 | 4.79 | 4.65 | 4.59 | 4.37 | 4.21 | 4.18 | 3.92 | 3.78 |
| 5.92  | 4.80 | 4.73 | 4.71 | 4.55 | 4.41 | 4.12 | 4.10 | 3.90 | 3.69 | 3.74 | 3.54 |
| 6.12  | 4.95 | 4.99 | 4.83 | 4.63 | 4.54 | 4.27 | 4.11 | 3.99 | 3.82 | 3.72 | 3.62 |
| 6.32  | 4.84 | 4.72 | 4.54 | 4.46 | 4.32 | 4.05 | 3.90 | 3.79 | 3.65 | 3.55 | 3.23 |
| 6.52  | 4.92 | 4.95 | 4.74 | 4.51 | 4.40 | 4.31 | 4.06 | 4.02 | 3.82 | 3.66 | 3.45 |
| 6.72  | 5.23 | 4.93 | 4.91 | 4.73 | 4.64 | 4.40 | 4.36 | 4.09 | 3.90 | 3.77 | 3.85 |
| 6.92  | 4.86 | 4.77 | 4.74 | 4.47 | 4.41 | 4.25 | 4.10 | 3.93 | 3.81 | 3.68 | 3.45 |
| 7.12  | 4.96 | 4.80 | 4.59 | 4.56 | 4.49 | 4.30 | 4.05 | 3.99 | 3.82 | 3.59 | 3.37 |
| 7.32  | 5.09 | 4.93 | 4.83 | 4.55 | 4.52 | 4.44 | 4.06 | 3.95 | 3.91 | 3.72 | 3.53 |
| 7.52  | 4.88 | 4.77 | 4.63 | 4.59 | 4.47 | 4.27 | 3.95 | 3.82 | 3.77 | 3.66 | 3.47 |
| 7.72  | 5.00 | 4.84 | 4.63 | 4.67 | 4.42 | 4.23 | 4.06 | 3.97 | 3.83 | 3.71 | 3.52 |
| 7.92  | 4.84 | 4.78 | 4.64 | 4.41 | 4.45 | 4.24 | 4.06 | 3.89 | 3.75 | 3.59 | 3.35 |
| 8.12  | 5.03 | 4.89 | 4.84 | 4.66 | 4.52 | 4.31 | 4.10 | 3.99 | 3.95 | 3.80 | 3.60 |
| 8.32  | 4.94 | 4.84 | 4.68 | 4.53 | 4.44 | 4.31 | 4.23 | 3.99 | 3.74 | 3.49 | 3.49 |
| 8.52  | 4.70 | 4.53 | 4.47 | 4.25 | 4.18 | 4.07 | 3.86 | 3.65 | 3.59 | 3.50 | 3.15 |
| 8.72  | 5.01 | 4.90 | 4.80 | 4.64 | 4.39 | 4.27 | 4.10 | 3.88 | 3.76 | 3.72 | 3.52 |
| 8.92  | 4.75 | 4.76 | 4.70 | 4.57 | 4.39 | 4.10 | 4.00 | 3.84 | 3.77 | 3.48 | 3.33 |
| 9.12  | 5.01 | 4.98 | 4.51 | 4.54 | 4.42 | 4.25 | 4.10 | 4.01 | 3.74 | 3.67 | 3.45 |
| 9.32  | 4.56 | 4.57 | 4.27 | 4.30 | 4.23 | 3.90 | 3.79 | 3.59 | 3.52 | 3.35 | 3.24 |
| 9.52  | 4.83 | 4.77 | 4.66 | 4.48 | 4.23 | 4.08 | 4.13 | 3.80 | 3.68 | 3.55 | 3.34 |
| 9.72  | 4.85 | 4.71 | 4.48 | 4.37 | 4.27 | 4.06 | 3.92 | 3.74 | 3.58 | 3.44 | 3.19 |
| 9.92  | 4.73 | 4.71 | 4.55 | 4.43 | 4.27 | 4.13 | 3.95 | 3.86 | 3.59 | 3.35 | 3.26 |
| 10.12 | 5.00 | 4.87 | 4.74 | 4.50 | 4.48 | 4.23 | 4.09 | 3.86 | 3.73 | 3.60 | 3.29 |
| 10.32 | 4.55 | 4.49 | 4.35 | 4.21 | 4.09 | 3.90 | 3.72 | 3.53 | 3.43 | 3.23 | 3.07 |
| 10.52 | 4.83 | 4.67 | 4.64 | 4.47 | 4.26 | 4.05 | 3.98 | 3.67 | 3.52 | 3.44 | 3.37 |
| 10.72 | 4.83 | 4.70 | 4.54 | 4.42 | 4.39 | 4.13 | 3.84 | 3.68 | 3.57 | 3.48 | 3.35 |
| 10.92 | 4.62 | 4.49 | 4.34 | 4.25 | 4.08 | 3.98 | 3.74 | 3.72 | 3.52 | 3.37 | 3.20 |
| 11.12 | 4.71 | 4.53 | 4.44 | 4.36 | 4.10 | 4.07 | 3.84 | 3.76 | 3.64 | 3.38 | 3.22 |

|       |      |      |      |      |      |      |      |      |      |      |      |
|-------|------|------|------|------|------|------|------|------|------|------|------|
| 11.32 | 4.95 | 4.81 | 4.64 | 4.62 | 4.44 | 4.36 | 3.99 | 3.84 | 3.81 | 3.63 | 3.49 |
| 11.52 | 4.57 | 4.55 | 4.46 | 4.23 | 4.32 | 4.05 | 3.81 | 3.85 | 3.63 | 3.42 | 3.22 |
| 11.72 | 4.80 | 4.60 | 4.53 | 4.39 | 4.19 | 4.17 | 3.79 | 3.59 | 3.56 | 3.44 | 3.22 |
| 11.92 | 4.70 | 4.59 | 4.42 | 4.26 | 4.04 | 4.09 | 3.84 | 3.53 | 3.47 | 3.25 | 3.14 |
| 12.12 | 4.95 | 4.74 | 4.62 | 4.48 | 4.32 | 4.26 | 4.02 | 3.80 | 3.69 | 3.57 | 3.35 |
| 12.32 | 5.02 | 4.84 | 4.74 | 4.51 | 4.39 | 4.15 | 3.93 | 3.80 | 3.64 | 3.48 | 3.26 |
| 12.52 | 4.74 | 4.54 | 4.64 | 4.25 | 4.11 | 3.87 | 3.89 | 3.79 | 3.49 | 3.28 | 3.23 |
| 12.72 | 4.89 | 4.67 | 4.72 | 4.49 | 4.25 | 4.16 | 4.04 | 3.67 | 3.70 | 3.59 | 3.31 |
| 12.92 | 4.76 | 4.59 | 4.57 | 4.41 | 4.21 | 4.05 | 3.84 | 3.59 | 3.48 | 3.42 | 3.24 |
| 13.12 | 4.61 | 4.18 | 4.17 | 4.12 | 4.01 | 3.77 | 3.65 | 3.47 | 3.45 | 3.29 | 3.18 |
| 13.32 | 4.82 | 4.59 | 4.42 | 4.42 | 4.31 | 4.04 | 3.88 | 3.77 | 3.49 | 3.33 | 3.26 |
| 13.52 | 4.53 | 4.41 | 4.42 | 4.19 | 3.95 | 3.94 | 3.66 | 3.58 | 3.46 | 3.23 | 3.17 |
| 13.72 | 4.89 | 4.80 | 4.68 | 4.39 | 4.30 | 4.16 | 3.97 | 3.76 | 3.50 | 3.57 | 3.29 |
| 13.92 | 4.81 | 4.52 | 4.47 | 4.36 | 4.29 | 3.94 | 3.81 | 3.61 | 3.64 | 3.40 | 3.33 |
| 14.00 | 4.94 | 4.75 | 4.70 | 4.55 | 4.32 | 4.18 | 4.03 | 3.76 | 3.63 | 3.61 | 3.36 |
| 14.08 | 4.60 | 4.65 | 4.46 | 4.29 | 4.10 | 3.95 | 3.76 | 3.57 | 3.57 | 3.29 | 3.14 |
| 14.17 | 4.79 | 4.50 | 4.42 | 4.29 | 4.04 | 3.92 | 3.71 | 3.52 | 3.50 | 3.29 | 3.15 |
| 14.27 | 4.71 | 4.60 | 4.44 | 4.38 | 3.98 | 3.99 | 3.73 | 3.64 | 3.46 | 3.32 | 3.19 |
| 14.38 | 4.70 | 4.59 | 4.44 | 4.27 | 4.19 | 4.02 | 3.69 | 3.76 | 3.59 | 3.23 | 3.18 |
| 14.49 | 4.66 | 4.47 | 4.36 | 4.23 | 4.10 | 3.90 | 3.67 | 3.48 | 3.34 | 3.26 | 3.17 |
| 14.61 | 4.53 | 4.49 | 4.30 | 4.22 | 4.08 | 3.90 | 3.72 | 3.51 | 3.31 | 3.19 | 3.09 |
| 14.75 | 4.45 | 4.36 | 4.19 | 4.12 | 4.05 | 3.99 | 3.70 | 3.60 | 3.38 | 3.31 | 3.01 |
| 14.89 | 5.15 | 5.00 | 4.75 | 4.70 | 4.41 | 4.39 | 4.15 | 3.83 | 3.69 | 3.46 | 3.34 |
| 15.05 | 4.75 | 4.70 | 4.41 | 4.27 | 4.10 | 4.02 | 3.75 | 3.56 | 3.42 | 3.44 | 3.04 |
| 15.21 | 4.84 | 4.69 | 4.49 | 4.40 | 4.34 | 4.18 | 3.96 | 3.88 | 3.56 | 3.42 | 3.26 |
| 15.39 | 4.54 | 4.56 | 4.30 | 4.31 | 4.05 | 3.96 | 3.79 | 3.54 | 3.36 | 3.32 | 3.12 |
| 15.59 | 4.63 | 4.62 | 4.30 | 4.35 | 3.93 | 3.74 | 3.65 | 3.60 | 3.39 | 3.21 | 3.15 |
| 15.80 | 4.74 | 4.67 | 4.64 | 4.36 | 4.24 | 4.00 | 3.94 | 3.67 | 3.59 | 3.40 | 3.18 |
| 16.02 | 4.63 | 4.32 | 4.38 | 4.16 | 3.89 | 3.88 | 3.69 | 3.55 | 3.30 | 3.24 | 3.00 |
| 16.27 | 4.81 | 4.67 | 4.54 | 4.34 | 4.28 | 4.06 | 3.88 | 3.85 | 3.64 | 3.50 | 3.34 |
| 16.53 | 4.68 | 4.57 | 4.39 | 4.27 | 4.13 | 3.84 | 3.63 | 3.71 | 3.46 | 3.24 | 3.22 |
| 16.81 | 4.53 | 4.52 | 4.41 | 4.29 | 4.01 | 3.99 | 3.66 | 3.62 | 3.38 | 3.21 | 2.96 |
| 17.12 | 4.74 | 4.72 | 4.55 | 4.23 | 4.05 | 3.95 | 3.75 | 3.71 | 3.47 | 3.36 | 3.07 |
| 17.45 | 4.55 | 4.29 | 4.19 | 3.97 | 3.89 | 3.56 | 3.43 | 3.30 | 3.14 | 3.01 | 2.99 |
| 17.81 | 4.85 | 4.74 | 4.55 | 4.40 | 4.21 | 4.11 | 3.80 | 3.77 | 3.55 | 3.35 | 3.15 |
| 18.19 | 4.96 | 4.66 | 4.54 | 4.38 | 4.19 | 4.12 | 3.82 | 3.78 | 3.66 | 3.34 | 3.25 |
| 18.60 | 4.94 | 4.75 | 4.61 | 4.49 | 4.34 | 4.20 | 3.95 | 3.83 | 3.66 | 3.40 | 3.33 |
| 19.05 | 4.77 | 4.55 | 4.62 | 4.39 | 4.20 | 4.05 | 3.83 | 3.71 | 3.52 | 3.34 | 3.17 |
| 19.53 | 4.66 | 4.50 | 4.31 | 4.23 | 4.09 | 3.85 | 3.65 | 3.48 | 3.33 | 3.17 | 3.04 |
| 20.05 | 4.83 | 4.53 | 4.52 | 4.28 | 4.15 | 3.91 | 3.80 | 3.59 | 3.42 | 3.39 | 3.05 |
| 20.61 | 4.72 | 4.63 | 4.57 | 4.39 | 4.31 | 3.89 | 3.85 | 3.64 | 3.61 | 3.27 | 3.21 |
| 21.22 | 4.72 | 4.59 | 4.27 | 4.25 | 4.10 | 3.87 | 3.75 | 3.55 | 3.56 | 3.23 | 3.10 |
| 21.87 | 4.71 | 4.48 | 4.38 | 4.33 | 4.07 | 3.94 | 3.69 | 3.60 | 3.42 | 3.31 | 3.05 |
| 22.57 | 4.76 | 4.55 | 4.45 | 4.20 | 4.09 | 3.98 | 3.75 | 3.57 | 3.47 | 3.22 | 2.97 |
| 23.33 | 4.76 | 4.57 | 4.47 | 4.37 | 4.25 | 3.98 | 3.75 | 3.69 | 3.41 | 3.26 | 3.08 |
| 24.15 | 4.71 | 4.52 | 4.35 | 4.24 | 4.14 | 3.88 | 3.84 | 3.49 | 3.33 | 3.24 | 2.97 |
| 25.03 | 4.59 | 4.40 | 4.27 | 4.18 | 3.88 | 3.84 | 3.54 | 3.39 | 3.25 | 3.09 | 2.90 |
| 25.98 | 4.73 | 4.62 | 4.44 | 4.26 | 4.09 | 3.85 | 3.74 | 3.55 | 3.32 | 3.20 | 3.11 |
| 27.01 | 4.62 | 4.65 | 4.26 | 4.15 | 4.00 | 3.85 | 3.63 | 3.45 | 3.41 | 3.30 | 3.03 |
| 28.11 | 4.54 | 4.50 | 4.47 | 4.29 | 4.09 | 4.00 | 3.75 | 3.55 | 3.39 | 3.15 | 3.07 |

|        |      |      |      |      |      |      |      |      |      |      |      |
|--------|------|------|------|------|------|------|------|------|------|------|------|
| 29.30  | 4.50 | 4.47 | 4.49 | 4.18 | 3.99 | 3.92 | 3.68 | 3.51 | 3.31 | 3.18 | 3.06 |
| 30.59  | 4.66 | 4.39 | 4.34 | 4.20 | 4.08 | 3.74 | 3.68 | 3.52 | 3.26 | 3.19 | 3.01 |
| 31.98  | 4.58 | 4.36 | 4.23 | 4.13 | 3.98 | 3.80 | 3.52 | 3.26 | 3.25 | 3.06 | 2.86 |
| 33.47  | 4.63 | 4.37 | 4.33 | 4.07 | 3.91 | 3.79 | 3.63 | 3.53 | 3.34 | 3.08 | 2.95 |
| 35.09  | 4.59 | 4.50 | 4.33 | 4.17 | 3.88 | 3.82 | 3.56 | 3.50 | 3.26 | 3.03 | 3.00 |
| 36.83  | 4.52 | 4.34 | 4.09 | 4.01 | 3.87 | 3.66 | 3.61 | 3.44 | 3.29 | 3.13 | 2.96 |
| 38.71  | 4.38 | 4.36 | 4.25 | 4.11 | 3.77 | 3.71 | 3.51 | 3.36 | 3.22 | 3.01 | 2.68 |
| 40.73  | 4.56 | 4.34 | 4.18 | 4.10 | 3.94 | 3.73 | 3.55 | 3.31 | 3.26 | 3.07 | 2.92 |
| 42.92  | 4.53 | 4.44 | 4.37 | 4.13 | 4.06 | 3.78 | 3.62 | 3.39 | 3.25 | 3.19 | 2.89 |
| 45.27  | 4.44 | 4.27 | 4.25 | 4.02 | 3.89 | 3.67 | 3.35 | 3.33 | 3.26 | 3.11 | 2.85 |
| 47.81  | 4.59 | 4.29 | 4.18 | 3.92 | 3.88 | 3.75 | 3.55 | 3.36 | 3.25 | 3.15 | 2.86 |
| 50.55  | 4.06 | 4.09 | 3.89 | 3.69 | 3.56 | 3.38 | 3.16 | 2.93 | 2.79 | 2.75 | 2.54 |
| 53.51  | 4.60 | 4.30 | 4.30 | 4.13 | 3.86 | 3.71 | 3.51 | 3.31 | 3.15 | 2.96 | 2.80 |
| 56.69  | 4.49 | 4.45 | 4.27 | 4.13 | 3.77 | 3.81 | 3.62 | 3.34 | 3.13 | 3.13 | 3.02 |
| 60.13  | 4.27 | 4.23 | 4.12 | 3.95 | 3.76 | 3.57 | 3.34 | 3.27 | 3.00 | 2.93 | 2.61 |
| 63.84  | 4.51 | 4.33 | 4.24 | 4.13 | 3.89 | 3.61 | 3.51 | 3.43 | 3.25 | 3.05 | 2.85 |
| 67.83  | 4.35 | 4.16 | 3.99 | 3.86 | 3.73 | 3.55 | 3.31 | 3.14 | 3.00 | 2.92 | 2.71 |
| 72.15  | 4.24 | 4.18 | 4.21 | 3.99 | 3.74 | 3.49 | 3.30 | 3.20 | 3.03 | 2.78 | 2.72 |
| 76.80  | 4.38 | 4.07 | 3.99 | 3.87 | 3.61 | 3.52 | 3.25 | 3.05 | 2.88 | 2.80 | 2.57 |
| 81.81  | 4.46 | 4.29 | 4.19 | 3.90 | 3.84 | 3.59 | 3.38 | 3.32 | 3.15 | 2.87 | 2.80 |
| 87.22  | 4.26 | 3.98 | 3.97 | 3.75 | 3.65 | 3.44 | 3.22 | 3.06 | 2.95 | 2.89 | 2.60 |
| 93.06  | 4.32 | 4.00 | 3.98 | 3.77 | 3.70 | 3.47 | 3.40 | 3.09 | 2.92 | 2.78 | 2.63 |
| 99.35  | 4.32 | 4.20 | 3.97 | 3.87 | 3.81 | 3.52 | 3.35 | 2.99 | 2.91 | 2.84 | 2.58 |
| 106.13 | 4.13 | 3.99 | 3.94 | 3.66 | 3.56 | 3.32 | 3.08 | 3.10 | 2.80 | 2.69 | 2.43 |
| 113.45 | 4.46 | 4.19 | 4.12 | 4.01 | 3.75 | 3.55 | 3.32 | 3.13 | 3.15 | 2.80 | 2.61 |
| 121.34 | 4.29 | 4.18 | 4.00 | 3.75 | 3.69 | 3.46 | 3.25 | 3.03 | 2.94 | 2.89 | 2.61 |
| 129.86 | 4.13 | 3.84 | 3.71 | 3.60 | 3.43 | 3.28 | 3.08 | 2.86 | 2.59 | 2.64 | 2.35 |
| 139.04 | 4.02 | 4.04 | 3.71 | 3.60 | 3.57 | 3.19 | 3.18 | 2.98 | 2.71 | 2.57 | 2.30 |
| 148.94 | 4.02 | 3.80 | 3.62 | 3.44 | 3.36 | 3.09 | 2.90 | 2.70 | 2.65 | 2.39 | 2.26 |
| 159.62 | 4.06 | 3.96 | 3.78 | 3.61 | 3.46 | 3.33 | 3.01 | 2.84 | 2.85 | 2.57 | 2.44 |
| 171.14 | 4.26 | 3.98 | 3.88 | 3.76 | 3.44 | 3.34 | 3.05 | 2.86 | 2.86 | 2.65 | 2.47 |
| 183.56 | 3.85 | 3.82 | 3.63 | 3.43 | 3.23 | 3.09 | 2.88 | 2.70 | 2.60 | 2.35 | 2.28 |
| 196.96 | 4.20 | 4.06 | 3.89 | 3.71 | 3.45 | 3.26 | 3.03 | 2.77 | 2.69 | 2.61 | 2.22 |
| 211.41 | 4.06 | 3.96 | 3.77 | 3.46 | 3.24 | 3.15 | 2.86 | 2.80 | 2.68 | 2.55 | 2.24 |
| 226.99 | 4.00 | 3.91 | 3.84 | 3.51 | 3.42 | 3.21 | 2.99 | 2.82 | 2.67 | 2.52 | 2.29 |
| 243.80 | 3.75 | 3.55 | 3.56 | 3.26 | 3.13 | 2.92 | 2.77 | 2.50 | 2.30 | 2.22 | 2.05 |
| 261.93 | 4.04 | 3.96 | 3.88 | 3.58 | 3.32 | 3.34 | 2.95 | 2.80 | 2.73 | 2.56 | 2.36 |
| 281.48 | 4.02 | 3.81 | 3.57 | 3.45 | 3.23 | 2.98 | 2.77 | 2.74 | 2.61 | 2.37 | 2.15 |
| 302.56 | 3.75 | 3.60 | 3.55 | 3.26 | 3.04 | 2.88 | 2.75 | 2.57 | 2.39 | 2.25 | 2.13 |
| 325.30 | 3.86 | 3.80 | 3.54 | 3.40 | 3.26 | 3.09 | 2.80 | 2.58 | 2.49 | 2.34 | 2.11 |
| 349.83 | 3.67 | 3.49 | 3.44 | 3.16 | 3.01 | 2.95 | 2.80 | 2.53 | 2.40 | 2.14 | 1.98 |
| 376.28 | 3.68 | 3.55 | 3.49 | 3.18 | 3.09 | 2.85 | 2.62 | 2.51 | 2.42 | 2.12 | 2.04 |
| 404.81 | 3.83 | 3.71 | 3.47 | 3.20 | 3.16 | 2.89 | 2.73 | 2.64 | 2.40 | 2.27 | 1.93 |
| 435.58 | 3.69 | 3.62 | 3.38 | 3.25 | 3.11 | 2.73 | 2.55 | 2.48 | 2.27 | 2.20 | 2.06 |
| 468.76 | 3.83 | 3.40 | 3.31 | 3.16 | 2.93 | 2.78 | 2.65 | 2.48 | 2.25 | 2.01 | 1.99 |
| 504.55 | 3.46 | 3.27 | 3.12 | 2.99 | 2.76 | 2.71 | 2.48 | 2.32 | 2.16 | 2.05 | 1.82 |
| 543.15 | 3.53 | 3.35 | 3.16 | 3.06 | 2.90 | 2.75 | 2.53 | 2.28 | 2.18 | 2.03 | 1.86 |
| 584.78 | 3.40 | 3.24 | 3.03 | 2.89 | 2.79 | 2.61 | 2.48 | 2.36 | 2.22 | 1.97 | 1.79 |
| 629.68 | 3.47 | 3.23 | 3.14 | 2.84 | 2.85 | 2.57 | 2.41 | 2.18 | 2.13 | 2.05 | 1.92 |
| 678.10 | 3.56 | 3.37 | 3.21 | 3.02 | 2.79 | 2.73 | 2.43 | 2.31 | 2.20 | 1.95 | 1.77 |

|         |      |      |      |      |      |      |      |      |      |      |      |
|---------|------|------|------|------|------|------|------|------|------|------|------|
| 730.33  | 3.61 | 3.35 | 3.16 | 3.05 | 2.93 | 2.80 | 2.42 | 2.28 | 2.17 | 2.04 | 1.81 |
| 786.65  | 3.49 | 3.19 | 3.07 | 2.87 | 2.77 | 2.70 | 2.32 | 2.13 | 2.16 | 1.98 | 1.76 |
| 847.40  | 3.37 | 3.19 | 3.01 | 2.96 | 2.65 | 2.40 | 2.24 | 2.09 | 2.01 | 1.78 | 1.73 |
| 912.92  | 3.49 | 3.34 | 3.32 | 3.02 | 2.70 | 2.58 | 2.42 | 2.21 | 2.01 | 1.95 | 1.85 |
| 983.58  | 3.40 | 3.31 | 3.16 | 2.77 | 2.78 | 2.58 | 2.32 | 2.25 | 2.14 | 1.96 | 1.89 |
| 1059.78 | 3.31 | 3.17 | 3.07 | 2.83 | 2.65 | 2.53 | 2.43 | 2.17 | 2.03 | 1.95 | 1.73 |
| 1141.98 | 3.12 | 2.97 | 2.84 | 2.55 | 2.56 | 2.32 | 2.09 | 1.88 | 1.88 | 1.64 | 1.46 |
| 1230.62 | 2.95 | 2.83 | 2.72 | 2.48 | 2.36 | 2.19 | 2.13 | 1.92 | 1.66 | 1.75 | 1.49 |
| 1326.23 | 3.05 | 2.89 | 2.83 | 2.64 | 2.48 | 2.36 | 2.14 | 1.99 | 1.93 | 1.87 | 1.58 |
| 1429.34 | 3.21 | 3.17 | 2.83 | 2.78 | 2.53 | 2.43 | 2.35 | 2.09 | 1.94 | 1.79 | 1.67 |
| 1540.54 | 3.24 | 2.93 | 2.84 | 2.67 | 2.57 | 2.44 | 2.22 | 1.96 | 2.02 | 1.74 | 1.59 |
| 1660.48 | 3.09 | 2.86 | 2.84 | 2.57 | 2.42 | 2.28 | 1.98 | 1.90 | 1.87 | 1.66 | 1.54 |
| 1789.83 | 2.99 | 2.78 | 2.63 | 2.38 | 2.33 | 2.11 | 1.90 | 1.91 | 1.67 | 1.63 | 1.46 |
| 1929.34 | 2.98 | 2.95 | 2.83 | 2.70 | 2.41 | 2.34 | 2.05 | 1.96 | 1.82 | 1.63 | 1.52 |
| 2079.80 | 2.88 | 2.85 | 2.72 | 2.47 | 2.35 | 2.18 | 1.97 | 1.94 | 1.91 | 1.58 | 1.49 |
| 2242.08 | 2.95 | 2.74 | 2.64 | 2.46 | 2.33 | 2.08 | 2.04 | 1.88 | 1.72 | 1.51 | 1.36 |
| 2417.10 | 2.92 | 2.58 | 2.62 | 2.48 | 2.41 | 2.24 | 1.96 | 1.76 | 1.70 | 1.64 | 1.42 |
| 2605.85 | 2.79 | 2.77 | 2.47 | 2.46 | 2.29 | 2.12 | 1.96 | 1.67 | 1.63 | 1.51 | 1.41 |
| 2809.43 | 2.67 | 2.38 | 2.39 | 2.24 | 2.00 | 1.98 | 1.76 | 1.78 | 1.53 | 1.52 | 1.33 |
| 3028.99 | 2.61 | 2.62 | 2.35 | 2.17 | 2.17 | 2.06 | 1.72 | 1.60 | 1.66 | 1.41 | 1.22 |
| 3265.79 | 2.74 | 2.59 | 2.46 | 2.31 | 2.23 | 1.94 | 1.75 | 1.63 | 1.60 | 1.55 | 1.32 |
| 3521.18 | 2.75 | 2.67 | 2.49 | 2.20 | 2.06 | 1.94 | 1.82 | 1.66 | 1.53 | 1.44 | 1.34 |
| 3796.62 | 2.58 | 2.17 | 2.18 | 2.10 | 1.85 | 1.89 | 1.62 | 1.56 | 1.38 | 1.29 | 1.31 |

| Wavelength (nm) \ Time (ps) | 444.66 | 446.06 | 447.47 | 448.88 | 450.29 | 451.70 | 453.11 | 454.52 | 455.92 | 457.33 | 458.74 |
|-----------------------------|--------|--------|--------|--------|--------|--------|--------|--------|--------|--------|--------|
| -3.28                       | 0.01   | -0.17  | -0.20  | -0.12  | -0.15  | -0.03  | -0.07  | -0.13  | -0.11  | -0.07  | -0.04  |
| -2.78                       | -0.04  | -0.14  | -0.10  | -0.10  | -0.07  | -0.08  | 0.04   | -0.15  | -0.03  | -0.06  | -0.04  |
| -2.28                       | -0.03  | -0.02  | -0.08  | -0.02  | 0.12   | 0.01   | 0.00   | -0.04  | -0.02  | -0.08  | 0.07   |
| -1.78                       | 0.08   | 0.04   | 0.11   | 0.07   | 0.01   | -0.01  | 0.13   | 0.12   | 0.02   | 0.07   | 0.13   |
| -1.28                       | 0.07   | 0.09   | 0.03   | 0.00   | 0.01   | 0.04   | 0.00   | 0.01   | 0.00   | 0.02   | -0.03  |
| -0.78                       | -0.11  | -0.08  | -0.01  | -0.11  | -0.10  | -0.10  | -0.16  | -0.08  | -0.06  | -0.15  | -0.12  |
| -0.28                       | 0.05   | 0.01   | 0.10   | 0.00   | 0.08   | 0.01   | -0.05  | 0.00   | 0.08   | 0.13   | -0.03  |
| 0.22                        | 0.09   | 0.17   | 0.13   | 0.16   | 0.14   | 0.00   | 0.10   | 0.17   | 0.05   | 0.10   | 0.06   |
| 0.32                        | -0.12  | -0.07  | -0.08  | -0.03  | -0.16  | 0.05   | -0.07  | -0.13  | -0.03  | -0.09  | -0.04  |
| 0.42                        | 0.00   | 0.17   | 0.10   | 0.16   | 0.12   | 0.12   | 0.08   | 0.22   | 0.10   | 0.14   | 0.04   |
| 0.52                        | -0.04  | -0.03  | 0.00   | -0.03  | 0.08   | -0.02  | 0.01   | 0.05   | -0.02  | 0.07   | 0.07   |
| 0.62                        | -0.06  | -0.06  | 0.04   | -0.11  | 0.12   | 0.03   | 0.16   | 0.04   | -0.07  | 0.06   | 0.08   |
| 0.72                        | 0.16   | 0.19   | 0.28   | 0.23   | 0.21   | 0.28   | 0.31   | 0.24   | 0.28   | 0.21   | 0.31   |
| 0.77                        | 0.04   | 0.02   | 0.10   | 0.02   | 0.17   | 0.14   | -0.03  | 0.05   | -0.03  | 0.04   | -0.06  |
| 0.82                        | -0.01  | 0.05   | 0.06   | 0.03   | 0.09   | 0.00   | 0.04   | 0.09   | 0.06   | 0.10   | 0.15   |
| 0.87                        | 0.04   | -0.06  | 0.03   | -0.09  | 0.07   | 0.00   | 0.00   | 0.06   | -0.20  | -0.09  | -0.11  |
| 0.92                        | -0.06  | 0.00   | 0.08   | -0.08  | 0.04   | 0.00   | -0.12  | 0.01   | -0.03  | 0.08   | 0.06   |
| 0.97                        | -0.11  | -0.14  | -0.13  | -0.10  | -0.03  | -0.06  | -0.08  | -0.10  | -0.11  | -0.08  | -0.08  |
| 1.02                        | -0.09  | -0.03  | -0.01  | -0.16  | -0.04  | -0.02  | 0.06   | 0.00   | -0.06  | 0.01   | -0.05  |
| 1.07                        | 0.00   | 0.13   | 0.13   | 0.05   | 0.03   | 0.07   | 0.07   | 0.07   | 0.06   | 0.13   | 0.10   |
| 1.12                        | -0.11  | -0.05  | -0.09  | -0.19  | -0.07  | 0.01   | -0.12  | -0.09  | -0.10  | -0.07  | -0.13  |
| 1.17                        | -0.43  | -0.29  | -0.26  | -0.30  | -0.21  | -0.33  | -0.15  | -0.09  | -0.05  | -0.16  | -0.09  |
| 1.22                        | 1.46   | 1.13   | 0.72   | 0.30   | 0.13   | -0.12  | -0.16  | -0.31  | -0.32  | -0.28  | -0.22  |

|      |      |      |      |      |      |      |      |      |      |      |      |
|------|------|------|------|------|------|------|------|------|------|------|------|
| 1.27 | 5.35 | 4.95 | 4.52 | 4.06 | 3.64 | 3.11 | 2.73 | 2.17 | 1.72 | 1.55 | 1.26 |
| 1.32 | 6.41 | 6.42 | 6.35 | 6.29 | 6.20 | 6.10 | 5.86 | 5.64 | 5.31 | 5.08 | 4.76 |
| 1.37 | 5.15 | 5.10 | 4.99 | 5.04 | 5.03 | 5.03 | 4.96 | 4.93 | 4.83 | 4.78 | 4.81 |
| 1.42 | 4.94 | 4.82 | 4.63 | 4.56 | 4.53 | 4.22 | 4.08 | 3.94 | 3.79 | 3.84 | 3.61 |
| 1.47 | 4.64 | 4.52 | 4.34 | 4.16 | 4.06 | 4.00 | 3.70 | 3.60 | 3.35 | 3.20 | 3.07 |
| 1.52 | 4.30 | 4.21 | 4.08 | 3.85 | 3.88 | 3.70 | 3.38 | 3.23 | 3.06 | 2.96 | 2.66 |
| 1.57 | 4.23 | 4.12 | 3.94 | 3.83 | 3.74 | 3.44 | 3.27 | 3.12 | 2.97 | 2.82 | 2.60 |
| 1.62 | 4.25 | 4.14 | 3.98 | 3.82 | 3.69 | 3.47 | 3.47 | 3.21 | 3.02 | 2.77 | 2.54 |
| 1.67 | 4.28 | 4.19 | 4.03 | 3.70 | 3.61 | 3.47 | 3.22 | 3.09 | 2.90 | 2.65 | 2.46 |
| 1.72 | 4.26 | 4.13 | 4.00 | 3.77 | 3.64 | 3.39 | 3.13 | 2.98 | 2.75 | 2.66 | 2.44 |
| 1.77 | 4.08 | 3.96 | 3.77 | 3.54 | 3.38 | 3.22 | 2.97 | 2.95 | 2.71 | 2.51 | 2.31 |
| 1.82 | 4.10 | 3.92 | 3.60 | 3.56 | 3.50 | 3.10 | 3.11 | 2.97 | 2.65 | 2.58 | 2.49 |
| 1.87 | 3.95 | 3.89 | 3.78 | 3.60 | 3.47 | 3.21 | 3.08 | 2.95 | 2.69 | 2.48 | 2.40 |
| 1.92 | 4.03 | 3.80 | 3.66 | 3.53 | 3.34 | 3.17 | 3.02 | 2.91 | 2.70 | 2.58 | 2.29 |
| 1.97 | 3.92 | 3.68 | 3.53 | 3.44 | 3.26 | 3.17 | 2.86 | 2.77 | 2.67 | 2.41 | 2.24 |
| 2.02 | 4.05 | 3.83 | 3.60 | 3.54 | 3.46 | 3.03 | 3.01 | 2.92 | 2.70 | 2.37 | 2.26 |
| 2.07 | 3.73 | 3.64 | 3.60 | 3.21 | 3.22 | 2.93 | 2.76 | 2.67 | 2.47 | 2.29 | 2.02 |
| 2.12 | 4.22 | 4.11 | 3.77 | 3.59 | 3.54 | 3.37 | 3.10 | 2.93 | 2.74 | 2.54 | 2.46 |
| 2.17 | 4.08 | 3.89 | 3.67 | 3.54 | 3.50 | 3.23 | 3.02 | 2.93 | 2.63 | 2.55 | 2.37 |
| 2.22 | 3.80 | 3.64 | 3.51 | 3.32 | 3.25 | 3.00 | 2.79 | 2.67 | 2.50 | 2.23 | 2.11 |
| 2.27 | 3.96 | 3.85 | 3.67 | 3.47 | 3.48 | 3.19 | 2.88 | 2.80 | 2.64 | 2.48 | 2.37 |
| 2.32 | 3.87 | 3.65 | 3.65 | 3.35 | 3.30 | 2.94 | 2.92 | 2.68 | 2.50 | 2.37 | 2.12 |
| 2.37 | 3.93 | 3.72 | 3.51 | 3.27 | 3.33 | 3.07 | 2.85 | 2.61 | 2.44 | 2.28 | 2.08 |
| 2.42 | 3.93 | 3.83 | 3.59 | 3.43 | 3.27 | 3.02 | 2.89 | 2.84 | 2.65 | 2.45 | 2.16 |
| 2.47 | 3.58 | 3.56 | 3.40 | 3.14 | 3.02 | 3.00 | 2.69 | 2.50 | 2.43 | 2.23 | 2.10 |
| 2.52 | 3.73 | 3.62 | 3.57 | 3.36 | 3.31 | 3.06 | 2.97 | 2.64 | 2.56 | 2.39 | 2.18 |
| 2.57 | 3.53 | 3.54 | 3.31 | 3.19 | 2.83 | 2.82 | 2.63 | 2.35 | 2.34 | 2.08 | 1.93 |
| 2.62 | 3.72 | 3.68 | 3.47 | 3.23 | 3.23 | 2.92 | 2.73 | 2.53 | 2.54 | 2.31 | 2.13 |
| 2.67 | 3.63 | 3.37 | 3.33 | 3.18 | 2.99 | 2.81 | 2.68 | 2.37 | 2.37 | 2.16 | 1.95 |
| 2.72 | 3.66 | 3.52 | 3.44 | 3.18 | 3.16 | 2.80 | 2.74 | 2.45 | 2.40 | 2.39 | 2.13 |
| 2.77 | 3.88 | 3.84 | 3.78 | 3.56 | 3.30 | 3.15 | 2.92 | 2.83 | 2.73 | 2.48 | 2.25 |
| 2.82 | 3.74 | 3.55 | 3.47 | 3.26 | 3.12 | 3.00 | 2.77 | 2.59 | 2.39 | 2.22 | 2.08 |
| 2.87 | 3.54 | 3.45 | 3.39 | 3.10 | 3.03 | 2.84 | 2.64 | 2.52 | 2.33 | 2.16 | 1.93 |
| 2.92 | 3.76 | 3.50 | 3.43 | 3.18 | 3.18 | 2.81 | 2.74 | 2.56 | 2.40 | 2.12 | 2.00 |
| 2.97 | 3.54 | 3.48 | 3.54 | 3.18 | 3.13 | 2.81 | 2.66 | 2.52 | 2.29 | 2.16 | 1.96 |
| 3.02 | 3.82 | 3.63 | 3.46 | 3.16 | 3.20 | 3.00 | 2.78 | 2.64 | 2.44 | 2.24 | 2.07 |
| 3.07 | 3.81 | 3.68 | 3.47 | 3.19 | 3.13 | 2.87 | 2.80 | 2.62 | 2.29 | 2.27 | 2.09 |
| 3.12 | 3.86 | 3.66 | 3.49 | 3.29 | 3.15 | 2.92 | 2.81 | 2.66 | 2.53 | 2.33 | 2.12 |
| 3.17 | 3.71 | 3.56 | 3.38 | 3.28 | 3.03 | 2.90 | 2.69 | 2.62 | 2.31 | 2.19 | 1.97 |
| 3.22 | 3.68 | 3.53 | 3.42 | 3.25 | 3.02 | 2.84 | 2.63 | 2.50 | 2.34 | 2.19 | 1.96 |
| 3.27 | 3.70 | 3.58 | 3.38 | 3.21 | 3.10 | 2.94 | 2.80 | 2.49 | 2.45 | 2.18 | 1.90 |
| 3.32 | 3.90 | 3.64 | 3.52 | 3.39 | 3.21 | 3.08 | 2.84 | 2.59 | 2.35 | 2.22 | 2.16 |
| 3.37 | 3.59 | 3.38 | 3.18 | 3.11 | 2.88 | 2.75 | 2.54 | 2.32 | 2.12 | 2.09 | 1.74 |
| 3.42 | 3.75 | 3.60 | 3.37 | 3.29 | 3.13 | 2.84 | 2.82 | 2.55 | 2.36 | 2.18 | 1.99 |
| 3.47 | 3.61 | 3.46 | 3.30 | 3.15 | 2.93 | 2.82 | 2.58 | 2.51 | 2.20 | 2.12 | 1.94 |
| 3.52 | 3.56 | 3.49 | 3.30 | 3.09 | 3.02 | 2.80 | 2.62 | 2.45 | 2.20 | 2.07 | 1.99 |
| 3.57 | 3.53 | 3.37 | 3.26 | 3.11 | 2.89 | 2.80 | 2.64 | 2.30 | 2.15 | 1.97 | 1.95 |
| 3.62 | 3.67 | 3.40 | 3.45 | 3.13 | 2.98 | 2.85 | 2.65 | 2.50 | 2.34 | 2.10 | 1.94 |
| 3.67 | 3.50 | 3.27 | 3.12 | 2.95 | 2.93 | 2.57 | 2.45 | 2.38 | 2.16 | 2.04 | 1.87 |
| 3.72 | 3.60 | 3.46 | 3.26 | 3.00 | 2.94 | 2.77 | 2.69 | 2.39 | 2.23 | 2.19 | 1.95 |

|       |      |      |      |      |      |      |      |      |      |      |      |
|-------|------|------|------|------|------|------|------|------|------|------|------|
| 3.92  | 3.73 | 3.48 | 3.31 | 3.05 | 3.02 | 2.85 | 2.68 | 2.45 | 2.27 | 2.12 | 1.93 |
| 4.12  | 3.66 | 3.43 | 3.32 | 3.01 | 3.04 | 2.77 | 2.56 | 2.42 | 2.26 | 2.02 | 1.77 |
| 4.32  | 3.39 | 3.31 | 3.22 | 2.92 | 2.94 | 2.65 | 2.46 | 2.46 | 2.14 | 2.07 | 1.82 |
| 4.52  | 3.44 | 3.34 | 3.20 | 3.01 | 2.93 | 2.55 | 2.62 | 2.40 | 2.10 | 2.10 | 1.82 |
| 4.72  | 3.50 | 3.37 | 3.16 | 2.90 | 2.84 | 2.65 | 2.46 | 2.27 | 2.10 | 1.90 | 1.73 |
| 4.92  | 3.65 | 3.45 | 3.28 | 3.05 | 2.81 | 2.72 | 2.67 | 2.44 | 2.28 | 2.13 | 1.98 |
| 5.12  | 3.49 | 3.35 | 3.14 | 2.88 | 2.84 | 2.62 | 2.47 | 2.34 | 2.01 | 1.99 | 1.87 |
| 5.32  | 3.47 | 3.38 | 3.28 | 2.96 | 2.85 | 2.71 | 2.48 | 2.37 | 2.20 | 2.09 | 1.92 |
| 5.52  | 3.56 | 3.46 | 3.20 | 2.92 | 2.81 | 2.61 | 2.62 | 2.28 | 2.09 | 2.04 | 1.80 |
| 5.72  | 3.69 | 3.58 | 3.30 | 3.15 | 3.07 | 2.87 | 2.59 | 2.40 | 2.22 | 2.10 | 1.93 |
| 5.92  | 3.31 | 3.18 | 2.92 | 2.73 | 2.69 | 2.48 | 2.28 | 2.07 | 2.03 | 1.76 | 1.72 |
| 6.12  | 3.35 | 3.20 | 3.08 | 2.89 | 2.78 | 2.56 | 2.50 | 2.25 | 2.12 | 1.95 | 1.78 |
| 6.32  | 3.09 | 3.00 | 2.83 | 2.62 | 2.64 | 2.34 | 2.12 | 2.05 | 1.90 | 1.74 | 1.61 |
| 6.52  | 3.32 | 3.21 | 3.13 | 2.91 | 2.80 | 2.53 | 2.29 | 2.18 | 2.04 | 1.90 | 1.84 |
| 6.72  | 3.61 | 3.45 | 3.28 | 3.01 | 2.91 | 2.72 | 2.53 | 2.52 | 2.31 | 2.11 | 2.08 |
| 6.92  | 3.22 | 3.21 | 2.99 | 2.80 | 2.65 | 2.53 | 2.36 | 2.19 | 2.03 | 1.79 | 1.63 |
| 7.12  | 3.31 | 3.23 | 3.00 | 2.83 | 2.71 | 2.55 | 2.37 | 2.20 | 2.01 | 1.84 | 1.78 |
| 7.32  | 3.28 | 3.25 | 3.11 | 2.88 | 2.78 | 2.47 | 2.23 | 2.15 | 2.02 | 1.78 | 1.60 |
| 7.52  | 3.31 | 3.04 | 3.01 | 2.83 | 2.72 | 2.52 | 2.29 | 2.14 | 1.92 | 1.83 | 1.70 |
| 7.72  | 3.42 | 3.21 | 3.03 | 2.91 | 2.76 | 2.60 | 2.52 | 2.24 | 2.15 | 1.91 | 1.76 |
| 7.92  | 3.30 | 3.16 | 3.08 | 2.80 | 2.75 | 2.52 | 2.31 | 2.15 | 1.97 | 1.78 | 1.64 |
| 8.12  | 3.44 | 3.28 | 3.00 | 2.76 | 2.69 | 2.63 | 2.42 | 2.27 | 2.09 | 1.91 | 1.77 |
| 8.32  | 3.50 | 3.28 | 3.02 | 2.86 | 2.73 | 2.58 | 2.36 | 2.23 | 2.13 | 1.85 | 1.76 |
| 8.52  | 3.16 | 2.93 | 2.84 | 2.68 | 2.55 | 2.29 | 2.20 | 2.02 | 1.79 | 1.76 | 1.53 |
| 8.72  | 3.33 | 3.22 | 3.03 | 2.82 | 2.58 | 2.46 | 2.19 | 2.05 | 1.93 | 1.79 | 1.63 |
| 8.92  | 3.23 | 3.06 | 2.85 | 2.71 | 2.73 | 2.36 | 2.23 | 2.08 | 1.88 | 1.69 | 1.52 |
| 9.12  | 3.43 | 3.15 | 3.02 | 2.82 | 2.68 | 2.49 | 2.27 | 2.17 | 1.92 | 1.85 | 1.70 |
| 9.32  | 3.13 | 2.93 | 2.75 | 2.62 | 2.44 | 2.34 | 2.02 | 2.12 | 1.88 | 1.74 | 1.54 |
| 9.52  | 3.30 | 3.08 | 2.84 | 2.79 | 2.64 | 2.33 | 2.25 | 2.17 | 1.88 | 1.79 | 1.59 |
| 9.72  | 3.07 | 2.91 | 2.89 | 2.78 | 2.66 | 2.32 | 2.12 | 2.06 | 1.77 | 1.61 | 1.54 |
| 9.92  | 3.15 | 3.01 | 2.84 | 2.68 | 2.52 | 2.32 | 2.19 | 1.99 | 1.89 | 1.64 | 1.51 |
| 10.12 | 3.25 | 3.03 | 3.00 | 2.73 | 2.63 | 2.40 | 2.27 | 2.11 | 1.90 | 1.71 | 1.47 |
| 10.32 | 2.92 | 2.80 | 2.64 | 2.49 | 2.36 | 2.21 | 1.96 | 1.88 | 1.81 | 1.50 | 1.44 |
| 10.52 | 3.09 | 2.91 | 2.86 | 2.69 | 2.49 | 2.37 | 2.19 | 2.05 | 1.79 | 1.65 | 1.43 |
| 10.72 | 3.27 | 3.00 | 2.88 | 2.81 | 2.58 | 2.43 | 2.29 | 2.04 | 1.92 | 1.74 | 1.65 |
| 10.92 | 3.16 | 2.88 | 2.75 | 2.73 | 2.45 | 2.32 | 2.21 | 2.04 | 1.84 | 1.74 | 1.57 |
| 11.12 | 3.20 | 2.85 | 2.74 | 2.64 | 2.47 | 2.27 | 2.22 | 1.93 | 1.76 | 1.71 | 1.68 |
| 11.32 | 3.22 | 3.04 | 2.99 | 2.86 | 2.69 | 2.48 | 2.39 | 2.10 | 1.87 | 1.77 | 1.80 |
| 11.52 | 3.05 | 2.87 | 2.80 | 2.66 | 2.49 | 2.36 | 2.02 | 1.98 | 1.76 | 1.64 | 1.49 |
| 11.72 | 3.08 | 2.90 | 2.72 | 2.62 | 2.63 | 2.30 | 2.14 | 1.94 | 1.81 | 1.79 | 1.54 |
| 11.92 | 3.01 | 2.76 | 2.62 | 2.55 | 2.46 | 2.17 | 2.04 | 1.81 | 1.83 | 1.60 | 1.42 |
| 12.12 | 3.27 | 3.11 | 2.89 | 2.72 | 2.62 | 2.33 | 2.19 | 1.89 | 1.77 | 1.68 | 1.51 |
| 12.32 | 3.25 | 3.07 | 2.93 | 2.73 | 2.49 | 2.44 | 2.27 | 2.10 | 1.95 | 1.63 | 1.60 |
| 12.52 | 3.05 | 2.84 | 2.62 | 2.47 | 2.34 | 2.18 | 2.15 | 1.95 | 1.73 | 1.64 | 1.50 |
| 12.72 | 3.24 | 3.10 | 2.90 | 2.64 | 2.62 | 2.35 | 2.22 | 2.12 | 1.91 | 1.78 | 1.54 |
| 12.92 | 2.97 | 2.94 | 2.74 | 2.59 | 2.40 | 2.33 | 2.22 | 1.97 | 1.65 | 1.59 | 1.57 |
| 13.12 | 2.95 | 2.66 | 2.75 | 2.45 | 2.34 | 2.27 | 2.06 | 1.82 | 1.64 | 1.49 | 1.43 |
| 13.32 | 3.16 | 2.91 | 2.75 | 2.59 | 2.51 | 2.22 | 2.06 | 1.95 | 1.74 | 1.50 | 1.44 |
| 13.52 | 2.96 | 2.87 | 2.66 | 2.58 | 2.51 | 2.28 | 2.09 | 1.94 | 1.78 | 1.58 | 1.50 |
| 13.72 | 3.22 | 3.04 | 2.88 | 2.64 | 2.52 | 2.32 | 2.28 | 2.07 | 1.92 | 1.67 | 1.51 |



|       |      |      |      |      |      |      |      |      |      |      |      |
|-------|------|------|------|------|------|------|------|------|------|------|------|
| 13.92 | 3.07 | 2.98 | 2.70 | 2.68 | 2.41 | 2.26 | 2.09 | 1.96 | 1.75 | 1.68 | 1.48 |
| 14.00 | 3.18 | 3.10 | 2.95 | 2.58 | 2.64 | 2.29 | 2.32 | 2.01 | 1.94 | 1.70 | 1.57 |
| 14.08 | 3.06 | 2.80 | 2.76 | 2.42 | 2.45 | 2.29 | 2.06 | 1.88 | 1.83 | 1.64 | 1.41 |
| 14.17 | 2.94 | 2.91 | 2.64 | 2.57 | 2.35 | 2.15 | 2.10 | 1.79 | 1.67 | 1.50 | 1.37 |
| 14.27 | 2.98 | 2.88 | 2.76 | 2.55 | 2.43 | 2.25 | 2.05 | 1.91 | 1.81 | 1.58 | 1.53 |
| 14.38 | 3.05 | 2.87 | 2.62 | 2.59 | 2.38 | 2.25 | 2.04 | 2.00 | 1.67 | 1.58 | 1.56 |
| 14.49 | 2.90 | 2.71 | 2.64 | 2.45 | 2.35 | 2.22 | 1.99 | 1.87 | 1.61 | 1.62 | 1.41 |
| 14.61 | 2.94 | 2.85 | 2.55 | 2.54 | 2.39 | 2.09 | 2.06 | 1.73 | 1.60 | 1.62 | 1.41 |
| 14.75 | 2.91 | 2.59 | 2.61 | 2.43 | 2.32 | 2.10 | 2.04 | 1.83 | 1.57 | 1.62 | 1.47 |
| 14.89 | 3.34 | 3.07 | 2.98 | 2.80 | 2.78 | 2.43 | 2.28 | 2.27 | 1.93 | 1.83 | 1.66 |
| 15.05 | 2.96 | 2.76 | 2.71 | 2.47 | 2.45 | 2.15 | 1.98 | 1.84 | 1.76 | 1.69 | 1.49 |
| 15.21 | 3.07 | 3.01 | 2.86 | 2.64 | 2.54 | 2.39 | 2.24 | 2.07 | 1.79 | 1.71 | 1.47 |
| 15.39 | 3.09 | 2.84 | 2.66 | 2.58 | 2.30 | 2.28 | 2.10 | 1.96 | 1.76 | 1.67 | 1.52 |
| 15.59 | 2.86 | 2.91 | 2.67 | 2.49 | 2.38 | 2.22 | 1.97 | 1.90 | 1.71 | 1.54 | 1.44 |
| 15.80 | 3.18 | 2.99 | 2.77 | 2.56 | 2.62 | 2.36 | 2.10 | 1.93 | 1.90 | 1.77 | 1.56 |
| 16.02 | 2.95 | 2.65 | 2.55 | 2.41 | 2.26 | 2.05 | 2.03 | 1.78 | 1.62 | 1.59 | 1.31 |
| 16.27 | 3.04 | 2.94 | 2.89 | 2.57 | 2.43 | 2.38 | 2.23 | 1.99 | 1.77 | 1.71 | 1.59 |
| 16.53 | 3.00 | 2.79 | 2.65 | 2.56 | 2.38 | 2.24 | 2.05 | 1.98 | 1.77 | 1.62 | 1.41 |
| 16.81 | 2.86 | 2.75 | 2.48 | 2.38 | 2.44 | 2.19 | 2.06 | 1.84 | 1.73 | 1.50 | 1.43 |
| 17.12 | 3.02 | 2.84 | 2.73 | 2.51 | 2.28 | 2.30 | 2.06 | 1.92 | 1.86 | 1.58 | 1.50 |
| 17.45 | 2.93 | 2.71 | 2.56 | 2.35 | 2.24 | 2.08 | 1.93 | 1.82 | 1.71 | 1.43 | 1.39 |
| 17.81 | 3.10 | 2.99 | 2.84 | 2.54 | 2.53 | 2.40 | 2.17 | 1.86 | 1.85 | 1.68 | 1.57 |
| 18.19 | 3.07 | 2.98 | 2.84 | 2.61 | 2.51 | 2.24 | 2.27 | 2.01 | 1.71 | 1.73 | 1.53 |
| 18.60 | 3.12 | 2.87 | 2.85 | 2.68 | 2.60 | 2.36 | 2.18 | 2.00 | 1.84 | 1.67 | 1.46 |
| 19.05 | 3.14 | 2.96 | 2.88 | 2.61 | 2.54 | 2.41 | 2.17 | 2.00 | 1.82 | 1.58 | 1.58 |
| 19.53 | 2.95 | 2.70 | 2.57 | 2.46 | 2.18 | 2.08 | 2.06 | 1.91 | 1.67 | 1.50 | 1.31 |
| 20.05 | 3.03 | 2.76 | 2.70 | 2.43 | 2.38 | 2.11 | 2.03 | 1.82 | 1.69 | 1.52 | 1.39 |
| 20.61 | 2.99 | 2.92 | 2.67 | 2.43 | 2.39 | 2.19 | 1.98 | 1.85 | 1.75 | 1.55 | 1.48 |
| 21.22 | 3.02 | 2.86 | 2.70 | 2.57 | 2.43 | 2.18 | 2.15 | 2.02 | 1.76 | 1.59 | 1.53 |
| 21.87 | 2.89 | 2.87 | 2.76 | 2.47 | 2.38 | 2.25 | 2.02 | 1.85 | 1.69 | 1.51 | 1.23 |
| 22.57 | 2.98 | 2.81 | 2.79 | 2.47 | 2.31 | 2.19 | 2.05 | 1.94 | 1.73 | 1.59 | 1.49 |
| 23.33 | 2.91 | 2.80 | 2.70 | 2.45 | 2.39 | 2.19 | 2.08 | 1.83 | 1.72 | 1.48 | 1.41 |
| 24.15 | 2.95 | 2.80 | 2.68 | 2.44 | 2.36 | 2.22 | 2.07 | 1.83 | 1.69 | 1.48 | 1.34 |
| 25.03 | 2.94 | 2.65 | 2.53 | 2.27 | 2.28 | 1.99 | 1.98 | 1.89 | 1.62 | 1.47 | 1.43 |
| 25.98 | 2.98 | 2.79 | 2.65 | 2.47 | 2.36 | 2.19 | 1.98 | 1.92 | 1.78 | 1.54 | 1.37 |
| 27.01 | 2.72 | 2.72 | 2.42 | 2.36 | 2.32 | 2.13 | 1.78 | 1.75 | 1.59 | 1.34 | 1.25 |
| 28.11 | 2.96 | 2.75 | 2.65 | 2.36 | 2.35 | 2.20 | 1.99 | 1.72 | 1.78 | 1.45 | 1.29 |
| 29.30 | 2.83 | 2.79 | 2.59 | 2.42 | 2.29 | 2.09 | 1.97 | 1.81 | 1.54 | 1.45 | 1.35 |
| 30.59 | 2.95 | 2.74 | 2.57 | 2.41 | 2.36 | 2.12 | 2.00 | 1.74 | 1.56 | 1.42 | 1.36 |
| 31.98 | 2.75 | 2.48 | 2.46 | 2.23 | 2.10 | 1.92 | 1.79 | 1.66 | 1.45 | 1.30 | 1.11 |
| 33.47 | 2.71 | 2.61 | 2.50 | 2.39 | 2.27 | 1.97 | 1.88 | 1.77 | 1.56 | 1.43 | 1.24 |
| 35.09 | 2.79 | 2.73 | 2.37 | 2.12 | 2.26 | 1.95 | 1.84 | 1.73 | 1.66 | 1.36 | 1.31 |
| 36.83 | 2.69 | 2.61 | 2.64 | 2.35 | 2.21 | 2.07 | 1.91 | 1.65 | 1.55 | 1.47 | 1.19 |
| 38.71 | 2.68 | 2.58 | 2.35 | 2.24 | 2.08 | 1.88 | 1.75 | 1.65 | 1.35 | 1.35 | 1.14 |
| 40.73 | 2.72 | 2.65 | 2.52 | 2.40 | 2.07 | 1.93 | 1.90 | 1.65 | 1.51 | 1.29 | 1.31 |
| 42.92 | 2.79 | 2.56 | 2.44 | 2.40 | 2.26 | 1.94 | 1.83 | 1.77 | 1.51 | 1.33 | 1.30 |
| 45.27 | 2.76 | 2.50 | 2.56 | 2.29 | 2.12 | 2.14 | 1.79 | 1.68 | 1.60 | 1.45 | 1.25 |
| 47.81 | 2.80 | 2.55 | 2.51 | 2.20 | 2.22 | 2.06 | 1.84 | 1.70 | 1.49 | 1.35 | 1.24 |
| 50.55 | 2.45 | 2.31 | 2.16 | 1.93 | 1.95 | 1.71 | 1.55 | 1.38 | 1.28 | 1.09 | 1.01 |
| 53.51 | 2.72 | 2.61 | 2.41 | 2.27 | 2.17 | 1.92 | 1.80 | 1.58 | 1.47 | 1.44 | 1.24 |

|         |      |      |      |      |      |      |      |      |      |      |      |
|---------|------|------|------|------|------|------|------|------|------|------|------|
| 56.69   | 2.86 | 2.72 | 2.46 | 2.37 | 2.22 | 1.98 | 1.78 | 1.77 | 1.39 | 1.23 | 1.02 |
| 60.13   | 2.47 | 2.39 | 2.20 | 2.02 | 1.91 | 1.78 | 1.65 | 1.35 | 1.41 | 1.13 | 0.92 |
| 63.84   | 2.62 | 2.50 | 2.24 | 2.10 | 1.80 | 1.88 | 1.70 | 1.58 | 1.38 | 1.11 | 1.00 |
| 67.83   | 2.57 | 2.35 | 2.17 | 2.03 | 2.04 | 1.74 | 1.62 | 1.43 | 1.26 | 1.26 | 1.01 |
| 72.15   | 2.54 | 2.38 | 2.23 | 1.99 | 1.97 | 1.72 | 1.58 | 1.46 | 1.25 | 1.10 | 1.03 |
| 76.80   | 2.36 | 2.36 | 2.18 | 1.88 | 1.83 | 1.54 | 1.44 | 1.34 | 1.20 | 1.04 | 0.80 |
| 81.81   | 2.69 | 2.42 | 2.39 | 2.18 | 2.03 | 1.84 | 1.59 | 1.49 | 1.31 | 1.20 | 1.02 |
| 87.22   | 2.49 | 2.31 | 2.04 | 1.89 | 1.87 | 1.69 | 1.64 | 1.35 | 1.32 | 1.01 | 0.93 |
| 93.06   | 2.44 | 2.27 | 2.19 | 1.92 | 1.85 | 1.62 | 1.46 | 1.25 | 1.14 | 1.09 | 0.82 |
| 99.35   | 2.49 | 2.30 | 2.09 | 1.95 | 1.81 | 1.59 | 1.68 | 1.47 | 1.18 | 1.00 | 0.90 |
| 106.13  | 2.29 | 2.22 | 2.05 | 1.81 | 1.68 | 1.54 | 1.45 | 1.28 | 1.10 | 1.00 | 0.75 |
| 113.45  | 2.64 | 2.31 | 2.24 | 2.07 | 2.05 | 1.74 | 1.53 | 1.45 | 1.22 | 1.14 | 0.97 |
| 121.34  | 2.45 | 2.18 | 2.15 | 1.98 | 1.82 | 1.65 | 1.48 | 1.31 | 1.04 | 0.96 | 0.74 |
| 129.86  | 2.20 | 2.11 | 1.87 | 1.72 | 1.60 | 1.45 | 1.28 | 1.15 | 0.90 | 0.85 | 0.60 |
| 139.04  | 2.34 | 2.18 | 1.97 | 1.83 | 1.72 | 1.48 | 1.36 | 1.22 | 1.00 | 0.92 | 0.75 |
| 148.94  | 2.12 | 1.96 | 1.74 | 1.56 | 1.54 | 1.44 | 1.21 | 1.01 | 0.92 | 0.71 | 0.61 |
| 159.62  | 2.33 | 2.10 | 1.92 | 1.79 | 1.70 | 1.43 | 1.25 | 1.18 | 1.03 | 0.87 | 0.65 |
| 171.14  | 2.28 | 2.18 | 1.94 | 1.68 | 1.71 | 1.52 | 1.32 | 1.23 | 0.94 | 0.83 | 0.62 |
| 183.56  | 2.09 | 1.90 | 1.74 | 1.59 | 1.42 | 1.19 | 1.17 | 0.93 | 0.90 | 0.66 | 0.56 |
| 196.96  | 2.16 | 2.03 | 1.81 | 1.72 | 1.68 | 1.27 | 1.19 | 1.08 | 0.82 | 0.62 | 0.48 |
| 211.41  | 2.19 | 1.97 | 1.92 | 1.72 | 1.80 | 1.33 | 1.12 | 1.07 | 0.96 | 0.75 | 0.48 |
| 226.99  | 2.21 | 2.00 | 1.95 | 1.69 | 1.55 | 1.36 | 1.24 | 0.89 | 0.87 | 0.71 | 0.55 |
| 243.80  | 1.96 | 1.66 | 1.69 | 1.40 | 1.32 | 1.10 | 1.04 | 0.83 | 0.74 | 0.65 | 0.45 |
| 261.93  | 2.20 | 2.03 | 1.94 | 1.61 | 1.61 | 1.43 | 1.22 | 0.93 | 0.81 | 0.64 | 0.54 |
| 281.48  | 1.95 | 1.97 | 1.73 | 1.63 | 1.56 | 1.26 | 1.14 | 1.02 | 0.84 | 0.65 | 0.44 |
| 302.56  | 1.93 | 1.87 | 1.67 | 1.54 | 1.37 | 1.16 | 0.99 | 0.90 | 0.76 | 0.54 | 0.46 |
| 325.30  | 2.00 | 1.92 | 1.67 | 1.47 | 1.41 | 1.25 | 0.93 | 0.87 | 0.85 | 0.59 | 0.43 |
| 349.83  | 1.89 | 1.78 | 1.66 | 1.37 | 1.34 | 1.24 | 1.05 | 0.91 | 0.81 | 0.55 | 0.42 |
| 376.28  | 1.84 | 1.79 | 1.61 | 1.30 | 1.31 | 1.21 | 0.97 | 0.89 | 0.64 | 0.48 | 0.27 |
| 404.81  | 1.84 | 1.77 | 1.56 | 1.42 | 1.37 | 1.16 | 1.00 | 0.92 | 0.68 | 0.56 | 0.37 |
| 435.58  | 1.90 | 1.70 | 1.56 | 1.39 | 1.33 | 1.15 | 0.90 | 0.74 | 0.73 | 0.56 | 0.32 |
| 468.76  | 1.71 | 1.68 | 1.48 | 1.27 | 1.37 | 1.06 | 0.83 | 0.80 | 0.61 | 0.51 | 0.25 |
| 504.55  | 1.68 | 1.43 | 1.38 | 1.29 | 1.17 | 0.97 | 0.89 | 0.75 | 0.55 | 0.42 | 0.27 |
| 543.15  | 1.70 | 1.64 | 1.50 | 1.31 | 1.26 | 0.94 | 0.89 | 0.63 | 0.64 | 0.45 | 0.38 |
| 584.78  | 1.61 | 1.49 | 1.38 | 1.30 | 1.14 | 1.05 | 0.93 | 0.62 | 0.52 | 0.45 | 0.31 |
| 629.68  | 1.62 | 1.53 | 1.44 | 1.27 | 1.29 | 1.14 | 0.75 | 0.79 | 0.54 | 0.41 | 0.33 |
| 678.10  | 1.77 | 1.61 | 1.44 | 1.20 | 1.11 | 0.98 | 0.82 | 0.73 | 0.54 | 0.45 | 0.35 |
| 730.33  | 1.74 | 1.65 | 1.46 | 1.26 | 1.34 | 1.20 | 1.01 | 0.79 | 0.69 | 0.57 | 0.39 |
| 786.65  | 1.70 | 1.57 | 1.46 | 1.32 | 1.16 | 1.04 | 0.88 | 0.77 | 0.63 | 0.46 | 0.29 |
| 847.40  | 1.61 | 1.37 | 1.25 | 1.08 | 0.97 | 0.89 | 0.87 | 0.60 | 0.46 | 0.40 | 0.29 |
| 912.92  | 1.66 | 1.52 | 1.37 | 1.24 | 1.20 | 0.92 | 0.84 | 0.63 | 0.49 | 0.41 | 0.19 |
| 983.58  | 1.66 | 1.58 | 1.38 | 1.17 | 1.17 | 0.95 | 0.81 | 0.77 | 0.74 | 0.45 | 0.36 |
| 1059.78 | 1.60 | 1.53 | 1.40 | 1.30 | 1.09 | 1.08 | 0.85 | 0.67 | 0.55 | 0.49 | 0.30 |
| 1141.98 | 1.33 | 1.32 | 1.23 | 1.01 | 1.05 | 0.87 | 0.74 | 0.67 | 0.46 | 0.39 | 0.34 |
| 1230.62 | 1.48 | 1.16 | 1.18 | 1.01 | 1.02 | 0.92 | 0.67 | 0.54 | 0.44 | 0.29 | 0.28 |
| 1326.23 | 1.56 | 1.34 | 1.29 | 1.24 | 1.07 | 0.94 | 0.87 | 0.74 | 0.57 | 0.52 | 0.47 |
| 1429.34 | 1.52 | 1.41 | 1.27 | 1.21 | 1.07 | 0.99 | 0.85 | 0.77 | 0.55 | 0.43 | 0.41 |
| 1540.54 | 1.48 | 1.36 | 1.26 | 1.07 | 1.04 | 0.94 | 0.80 | 0.81 | 0.56 | 0.54 | 0.38 |
| 1660.48 | 1.38 | 1.21 | 1.17 | 1.15 | 1.07 | 0.93 | 0.70 | 0.69 | 0.50 | 0.40 | 0.37 |
| 1789.83 | 1.39 | 1.33 | 1.17 | 1.13 | 1.05 | 0.84 | 0.73 | 0.74 | 0.58 | 0.43 | 0.37 |

|         |      |      |      |      |      |      |      |      |      |      |      |
|---------|------|------|------|------|------|------|------|------|------|------|------|
| 1929.34 | 1.51 | 1.40 | 1.27 | 1.09 | 1.04 | 0.93 | 0.81 | 0.61 | 0.66 | 0.53 | 0.42 |
| 2079.80 | 1.46 | 1.35 | 1.22 | 0.95 | 1.04 | 0.84 | 0.77 | 0.64 | 0.62 | 0.49 | 0.48 |
| 2242.08 | 1.31 | 1.26 | 1.15 | 1.02 | 1.00 | 0.90 | 0.66 | 0.70 | 0.58 | 0.55 | 0.38 |
| 2417.10 | 1.40 | 1.19 | 1.21 | 0.96 | 0.94 | 0.94 | 0.91 | 0.66 | 0.64 | 0.46 | 0.44 |
| 2605.85 | 1.39 | 1.26 | 1.18 | 1.01 | 1.03 | 0.93 | 0.89 | 0.76 | 0.69 | 0.59 | 0.57 |
| 2809.43 | 1.17 | 1.06 | 1.15 | 0.86 | 0.96 | 0.80 | 0.69 | 0.79 | 0.69 | 0.49 | 0.42 |
| 3028.99 | 1.31 | 1.13 | 1.11 | 0.99 | 0.91 | 0.81 | 0.74 | 0.68 | 0.41 | 0.48 | 0.41 |
| 3265.79 | 1.17 | 1.32 | 1.09 | 1.02 | 0.96 | 0.91 | 0.62 | 0.64 | 0.69 | 0.55 | 0.37 |
| 3521.18 | 1.14 | 1.22 | 1.10 | 0.92 | 0.88 | 0.83 | 0.73 | 0.71 | 0.65 | 0.54 | 0.44 |
| 3796.62 | 1.15 | 1.10 | 1.04 | 0.91 | 0.90 | 0.72 | 0.65 | 0.59 | 0.47 | 0.34 | 0.41 |

| Wavelength (nm) \ Time (ps) | 460.15 | 461.56 | 462.97 | 464.38 | 465.78 | 467.19 | 468.60 | 470.01 | 471.42 | 472.83 | 474.24 |
|-----------------------------|--------|--------|--------|--------|--------|--------|--------|--------|--------|--------|--------|
| -3.28                       | -0.13  | -0.12  | -0.12  | -0.17  | -0.18  | -0.14  | -0.10  | -0.06  | -0.09  | -0.10  | -0.11  |
| -2.78                       | -0.06  | -0.11  | -0.12  | -0.08  | -0.08  | 0.02   | -0.02  | -0.12  | -0.12  | -0.14  | -0.08  |
| -2.28                       | 0.07   | -0.03  | -0.05  | -0.09  | 0.06   | 0.06   | -0.09  | 0.06   | 0.07   | -0.08  | 0.04   |
| -1.78                       | 0.08   | 0.20   | 0.21   | 0.14   | 0.15   | 0.13   | 0.12   | 0.12   | 0.11   | 0.19   | 0.19   |
| -1.28                       | -0.01  | 0.01   | 0.00   | 0.07   | 0.00   | -0.09  | -0.02  | 0.00   | -0.13  | -0.06  | -0.11  |
| -0.78                       | -0.15  | -0.10  | -0.10  | -0.11  | -0.08  | -0.11  | 0.05   | -0.04  | 0.00   | -0.03  | -0.04  |
| -0.28                       | 0.02   | -0.03  | 0.03   | 0.02   | -0.02  | -0.07  | -0.09  | 0.02   | -0.01  | 0.00   | -0.01  |
| 0.22                        | 0.16   | 0.12   | 0.10   | 0.11   | 0.06   | 0.17   | 0.12   | -0.03  | 0.07   | 0.11   | 0.07   |
| 0.32                        | -0.01  | 0.01   | -0.08  | -0.06  | -0.09  | -0.04  | -0.05  | -0.10  | -0.07  | -0.04  | -0.16  |
| 0.42                        | 0.03   | 0.06   | 0.12   | 0.18   | 0.18   | 0.06   | 0.08   | 0.16   | 0.16   | 0.15   | 0.21   |
| 0.52                        | 0.03   | 0.01   | -0.03  | -0.04  | -0.06  | 0.07   | -0.01  | -0.01  | 0.04   | 0.04   | -0.04  |
| 0.62                        | 0.01   | -0.02  | 0.04   | 0.04   | 0.05   | 0.04   | 0.00   | 0.09   | 0.00   | 0.06   | 0.08   |
| 0.72                        | 0.27   | 0.31   | 0.25   | 0.27   | 0.24   | 0.28   | 0.22   | 0.26   | 0.21   | 0.29   | 0.22   |
| 0.77                        | 0.08   | 0.02   | 0.13   | 0.02   | 0.08   | 0.10   | 0.10   | 0.04   | 0.09   | 0.21   | 0.11   |
| 0.82                        | 0.00   | -0.01  | 0.03   | 0.07   | 0.18   | 0.00   | -0.01  | 0.01   | 0.10   | 0.16   | -0.02  |
| 0.87                        | -0.12  | -0.11  | -0.01  | -0.13  | -0.07  | -0.06  | -0.08  | -0.12  | -0.05  | -0.10  | -0.07  |
| 0.92                        | 0.03   | -0.10  | -0.07  | -0.12  | -0.01  | -0.03  | 0.05   | 0.05   | 0.10   | -0.01  | 0.02   |
| 0.97                        | -0.09  | -0.12  | -0.06  | -0.06  | -0.03  | -0.09  | -0.01  | -0.15  | -0.08  | 0.01   | -0.05  |
| 1.02                        | -0.02  | 0.07   | -0.05  | -0.12  | -0.02  | -0.02  | -0.03  | -0.06  | 0.02   | -0.12  | 0.07   |
| 1.07                        | 0.10   | 0.23   | 0.07   | 0.12   | 0.15   | 0.04   | 0.10   | 0.10   | 0.17   | 0.07   | 0.11   |
| 1.12                        | -0.17  | -0.20  | -0.22  | -0.16  | -0.14  | -0.13  | -0.09  | -0.19  | -0.16  | -0.15  | -0.14  |
| 1.17                        | -0.03  | -0.20  | -0.12  | 0.02   | 0.03   | 0.02   | -0.05  | -0.09  | -0.04  | -0.09  | -0.09  |
| 1.22                        | -0.30  | -0.23  | -0.15  | -0.08  | -0.12  | -0.15  | -0.08  | -0.07  | -0.01  | -0.07  | 0.02   |
| 1.27                        | 0.88   | 0.78   | 0.46   | 0.25   | 0.20   | 0.11   | -0.10  | -0.16  | -0.14  | -0.25  | -0.20  |
| 1.32                        | 4.32   | 4.04   | 3.41   | 3.10   | 2.87   | 2.39   | 1.99   | 1.65   | 1.27   | 0.96   | 0.67   |
| 1.37                        | 4.73   | 4.81   | 4.63   | 4.66   | 4.47   | 4.44   | 4.39   | 4.27   | 4.22   | 3.98   | 3.64   |
| 1.42                        | 3.49   | 3.33   | 3.35   | 3.37   | 3.39   | 3.18   | 3.28   | 3.33   | 3.24   | 3.42   | 3.39   |
| 1.47                        | 2.78   | 2.61   | 2.39   | 2.34   | 2.25   | 2.00   | 2.07   | 1.92   | 1.84   | 1.81   | 1.67   |
| 1.52                        | 2.41   | 2.26   | 2.06   | 1.89   | 1.93   | 1.65   | 1.53   | 1.48   | 1.39   | 1.30   | 1.11   |
| 1.57                        | 2.30   | 2.21   | 2.09   | 1.96   | 1.77   | 1.66   | 1.41   | 1.40   | 1.30   | 1.14   | 1.04   |
| 1.62                        | 2.29   | 2.21   | 2.03   | 1.92   | 1.84   | 1.66   | 1.47   | 1.37   | 1.24   | 1.19   | 0.88   |
| 1.67                        | 2.15   | 2.12   | 1.73   | 1.59   | 1.52   | 1.44   | 1.33   | 1.26   | 1.03   | 0.97   | 0.84   |
| 1.72                        | 2.13   | 2.11   | 1.92   | 1.57   | 1.59   | 1.43   | 1.25   | 1.11   | 1.03   | 0.91   | 0.80   |
| 1.77                        | 2.11   | 2.04   | 1.69   | 1.66   | 1.52   | 1.39   | 1.17   | 1.02   | 0.93   | 0.82   | 0.78   |
| 1.82                        | 2.09   | 2.02   | 1.73   | 1.68   | 1.49   | 1.58   | 1.28   | 1.19   | 1.05   | 0.92   | 0.71   |
| 1.87                        | 2.28   | 1.98   | 1.91   | 1.74   | 1.60   | 1.54   | 1.30   | 1.21   | 1.14   | 1.01   | 0.87   |

|      |      |      |      |      |      |      |      |      |      |      |      |
|------|------|------|------|------|------|------|------|------|------|------|------|
| 1.92 | 2.12 | 1.94 | 1.74 | 1.64 | 1.48 | 1.37 | 1.24 | 1.12 | 1.07 | 0.95 | 0.72 |
| 1.97 | 2.05 | 1.94 | 1.60 | 1.64 | 1.44 | 1.28 | 1.15 | 0.98 | 0.92 | 0.91 | 0.67 |
| 2.02 | 2.03 | 1.93 | 1.67 | 1.59 | 1.42 | 1.35 | 1.22 | 1.09 | 1.07 | 0.92 | 0.81 |
| 2.07 | 1.97 | 1.82 | 1.59 | 1.27 | 1.43 | 1.16 | 1.18 | 1.01 | 0.95 | 0.78 | 0.67 |
| 2.12 | 2.19 | 1.95 | 1.78 | 1.74 | 1.61 | 1.50 | 1.40 | 1.31 | 1.14 | 0.98 | 0.81 |
| 2.17 | 2.10 | 2.05 | 1.92 | 1.71 | 1.66 | 1.55 | 1.43 | 1.29 | 1.19 | 0.95 | 0.86 |
| 2.22 | 2.08 | 1.88 | 1.68 | 1.54 | 1.48 | 1.22 | 1.23 | 1.05 | 0.96 | 0.84 | 0.77 |
| 2.27 | 2.05 | 2.02 | 1.80 | 1.63 | 1.60 | 1.33 | 1.22 | 1.28 | 1.14 | 0.97 | 0.89 |
| 2.32 | 1.96 | 1.87 | 1.63 | 1.49 | 1.44 | 1.35 | 1.22 | 1.24 | 1.06 | 0.88 | 0.81 |
| 2.37 | 1.98 | 1.82 | 1.67 | 1.49 | 1.32 | 1.24 | 1.09 | 1.07 | 0.99 | 0.86 | 0.62 |
| 2.42 | 1.97 | 1.88 | 1.72 | 1.54 | 1.47 | 1.34 | 1.26 | 1.12 | 0.94 | 0.91 | 0.75 |
| 2.47 | 1.82 | 1.67 | 1.44 | 1.49 | 1.35 | 1.18 | 1.09 | 1.05 | 0.99 | 0.81 | 0.71 |
| 2.52 | 2.01 | 1.76 | 1.72 | 1.57 | 1.43 | 1.32 | 1.14 | 0.96 | 0.96 | 0.88 | 0.75 |
| 2.57 | 1.67 | 1.64 | 1.43 | 1.37 | 1.20 | 0.99 | 1.03 | 0.92 | 0.86 | 0.68 | 0.60 |
| 2.62 | 1.97 | 1.84 | 1.66 | 1.60 | 1.58 | 1.34 | 1.15 | 1.14 | 1.05 | 1.00 | 0.90 |
| 2.67 | 1.80 | 1.71 | 1.46 | 1.29 | 1.36 | 1.15 | 1.08 | 0.98 | 0.73 | 0.77 | 0.68 |
| 2.72 | 1.80 | 1.79 | 1.56 | 1.42 | 1.38 | 1.21 | 1.15 | 1.04 | 1.01 | 0.91 | 0.71 |
| 2.77 | 2.04 | 1.98 | 1.75 | 1.73 | 1.60 | 1.48 | 1.44 | 1.28 | 1.21 | 1.03 | 0.89 |
| 2.82 | 1.98 | 1.83 | 1.58 | 1.37 | 1.27 | 1.22 | 1.11 | 1.04 | 0.98 | 0.96 | 0.77 |
| 2.87 | 1.86 | 1.60 | 1.47 | 1.25 | 1.19 | 1.12 | 1.04 | 0.93 | 0.79 | 0.87 | 0.67 |
| 2.92 | 1.86 | 1.70 | 1.60 | 1.48 | 1.39 | 1.15 | 1.10 | 1.04 | 1.01 | 0.82 | 0.76 |
| 2.97 | 1.73 | 1.60 | 1.45 | 1.35 | 1.16 | 1.24 | 1.11 | 0.97 | 0.78 | 0.86 | 0.57 |
| 3.02 | 1.89 | 1.72 | 1.58 | 1.46 | 1.39 | 1.23 | 1.09 | 0.98 | 0.92 | 0.77 | 0.82 |
| 3.07 | 1.86 | 1.78 | 1.52 | 1.51 | 1.38 | 1.24 | 1.13 | 0.90 | 0.99 | 0.89 | 0.73 |
| 3.12 | 1.82 | 1.71 | 1.51 | 1.40 | 1.43 | 1.21 | 1.09 | 0.91 | 0.81 | 0.91 | 0.72 |
| 3.17 | 1.85 | 1.71 | 1.58 | 1.39 | 1.31 | 1.08 | 1.12 | 0.92 | 0.86 | 0.87 | 0.80 |
| 3.22 | 1.79 | 1.74 | 1.50 | 1.39 | 1.27 | 1.14 | 1.08 | 0.91 | 0.85 | 0.82 | 0.62 |
| 3.27 | 1.81 | 1.61 | 1.44 | 1.34 | 1.42 | 1.10 | 1.11 | 1.01 | 0.78 | 0.82 | 0.74 |
| 3.32 | 1.87 | 1.74 | 1.58 | 1.48 | 1.47 | 1.12 | 1.18 | 1.06 | 1.02 | 0.88 | 0.69 |
| 3.37 | 1.58 | 1.50 | 1.56 | 1.30 | 1.21 | 1.00 | 0.82 | 0.81 | 0.81 | 0.59 | 0.60 |
| 3.42 | 1.86 | 1.67 | 1.62 | 1.28 | 1.37 | 1.14 | 1.02 | 0.90 | 0.83 | 0.78 | 0.76 |
| 3.47 | 1.66 | 1.58 | 1.39 | 1.26 | 1.19 | 0.95 | 0.86 | 0.85 | 0.72 | 0.64 | 0.59 |
| 3.52 | 1.67 | 1.56 | 1.37 | 1.27 | 1.23 | 0.93 | 0.95 | 0.82 | 0.76 | 0.66 | 0.63 |
| 3.57 | 1.79 | 1.61 | 1.43 | 1.19 | 1.30 | 0.99 | 1.03 | 0.90 | 0.81 | 0.76 | 0.56 |
| 3.62 | 1.64 | 1.73 | 1.52 | 1.36 | 1.33 | 1.24 | 0.93 | 0.98 | 0.89 | 0.83 | 0.70 |
| 3.67 | 1.58 | 1.51 | 1.34 | 1.21 | 1.14 | 1.02 | 0.90 | 0.84 | 0.80 | 0.59 | 0.51 |
| 3.72 | 1.69 | 1.54 | 1.44 | 1.37 | 1.20 | 1.15 | 0.94 | 0.76 | 0.86 | 0.76 | 0.60 |
| 3.92 | 1.71 | 1.64 | 1.45 | 1.20 | 1.19 | 1.00 | 1.04 | 0.99 | 0.93 | 0.73 | 0.70 |
| 4.12 | 1.60 | 1.51 | 1.35 | 1.32 | 1.17 | 1.14 | 1.01 | 0.85 | 0.78 | 0.75 | 0.61 |
| 4.32 | 1.71 | 1.63 | 1.32 | 1.22 | 1.22 | 1.10 | 1.01 | 0.92 | 0.79 | 0.68 | 0.64 |
| 4.52 | 1.62 | 1.65 | 1.21 | 1.25 | 1.22 | 1.04 | 0.90 | 0.79 | 0.70 | 0.64 | 0.51 |
| 4.72 | 1.61 | 1.51 | 1.18 | 1.12 | 1.06 | 0.88 | 0.86 | 0.80 | 0.76 | 0.67 | 0.46 |
| 4.92 | 1.72 | 1.62 | 1.46 | 1.38 | 1.28 | 1.19 | 0.98 | 0.97 | 0.93 | 0.87 | 0.73 |
| 5.12 | 1.66 | 1.55 | 1.39 | 1.20 | 1.20 | 1.08 | 0.97 | 0.89 | 0.78 | 0.69 | 0.77 |
| 5.32 | 1.78 | 1.50 | 1.42 | 1.31 | 1.20 | 1.04 | 0.89 | 0.84 | 0.85 | 0.75 | 0.56 |
| 5.52 | 1.65 | 1.63 | 1.43 | 1.40 | 1.22 | 1.11 | 1.02 | 0.89 | 0.93 | 0.82 | 0.69 |
| 5.72 | 1.66 | 1.69 | 1.46 | 1.43 | 1.32 | 1.13 | 1.04 | 0.86 | 0.90 | 0.83 | 0.76 |
| 5.92 | 1.34 | 1.37 | 1.19 | 0.90 | 1.03 | 0.95 | 0.78 | 0.74 | 0.68 | 0.55 | 0.40 |
| 6.12 | 1.63 | 1.40 | 1.27 | 1.07 | 1.09 | 0.90 | 0.89 | 0.85 | 0.69 | 0.61 | 0.51 |
| 6.32 | 1.35 | 1.29 | 1.08 | 0.95 | 0.93 | 0.90 | 0.80 | 0.71 | 0.56 | 0.39 | 0.48 |

|       |      |      |      |      |      |      |      |      |      |      |      |
|-------|------|------|------|------|------|------|------|------|------|------|------|
| 6.52  | 1.54 | 1.40 | 1.23 | 1.07 | 1.06 | 1.00 | 0.77 | 0.72 | 0.72 | 0.71 | 0.77 |
| 6.72  | 1.78 | 1.59 | 1.45 | 1.42 | 1.31 | 1.14 | 1.09 | 0.94 | 0.94 | 0.82 | 0.69 |
| 6.92  | 1.47 | 1.33 | 1.24 | 1.13 | 1.01 | 0.88 | 0.82 | 0.73 | 0.70 | 0.58 | 0.41 |
| 7.12  | 1.49 | 1.36 | 1.24 | 0.88 | 1.01 | 1.04 | 0.78 | 0.70 | 0.66 | 0.64 | 0.59 |
| 7.32  | 1.47 | 1.43 | 1.28 | 1.06 | 0.97 | 0.81 | 0.82 | 0.73 | 0.69 | 0.52 | 0.57 |
| 7.52  | 1.44 | 1.32 | 1.21 | 1.13 | 1.01 | 0.91 | 0.89 | 0.81 | 0.67 | 0.62 | 0.51 |
| 7.72  | 1.52 | 1.41 | 1.24 | 1.13 | 1.08 | 0.95 | 0.91 | 0.75 | 0.70 | 0.69 | 0.53 |
| 7.92  | 1.48 | 1.28 | 1.23 | 1.00 | 0.97 | 0.85 | 0.89 | 0.68 | 0.74 | 0.47 | 0.58 |
| 8.12  | 1.63 | 1.43 | 1.16 | 1.13 | 1.15 | 0.92 | 0.80 | 0.81 | 0.78 | 0.66 | 0.57 |
| 8.32  | 1.52 | 1.35 | 1.20 | 1.07 | 1.10 | 0.92 | 0.81 | 0.79 | 0.59 | 0.59 | 0.59 |
| 8.52  | 1.34 | 1.26 | 1.04 | 1.09 | 0.94 | 0.77 | 0.68 | 0.69 | 0.53 | 0.45 | 0.45 |
| 8.72  | 1.34 | 1.24 | 1.10 | 1.04 | 0.79 | 0.73 | 0.68 | 0.70 | 0.67 | 0.42 | 0.35 |
| 8.92  | 1.37 | 1.32 | 1.12 | 0.88 | 0.89 | 0.67 | 0.67 | 0.66 | 0.54 | 0.46 | 0.46 |
| 9.12  | 1.45 | 1.31 | 1.15 | 1.03 | 0.99 | 0.83 | 0.76 | 0.69 | 0.57 | 0.60 | 0.43 |
| 9.32  | 1.31 | 1.28 | 1.17 | 1.02 | 0.83 | 0.80 | 0.81 | 0.68 | 0.61 | 0.52 | 0.49 |
| 9.52  | 1.41 | 1.38 | 1.10 | 0.97 | 0.96 | 0.74 | 0.72 | 0.75 | 0.56 | 0.69 | 0.31 |
| 9.72  | 1.31 | 1.25 | 1.02 | 0.90 | 0.86 | 0.86 | 0.76 | 0.56 | 0.62 | 0.40 | 0.45 |
| 9.92  | 1.35 | 1.24 | 1.17 | 0.96 | 0.99 | 0.78 | 0.80 | 0.75 | 0.72 | 0.53 | 0.45 |
| 10.12 | 1.28 | 1.39 | 1.06 | 1.03 | 0.77 | 0.75 | 0.77 | 0.58 | 0.53 | 0.53 | 0.43 |
| 10.32 | 1.18 | 1.17 | 0.96 | 0.83 | 0.82 | 0.63 | 0.66 | 0.69 | 0.41 | 0.42 | 0.52 |
| 10.52 | 1.11 | 1.22 | 1.06 | 0.93 | 0.84 | 0.74 | 0.68 | 0.51 | 0.54 | 0.46 | 0.31 |
| 10.72 | 1.47 | 1.33 | 1.11 | 1.00 | 0.94 | 0.78 | 0.83 | 0.78 | 0.63 | 0.62 | 0.52 |
| 10.92 | 1.33 | 1.26 | 1.10 | 0.96 | 0.90 | 0.71 | 0.72 | 0.74 | 0.50 | 0.45 | 0.42 |
| 11.12 | 1.29 | 1.18 | 0.95 | 0.86 | 0.89 | 0.73 | 0.61 | 0.53 | 0.47 | 0.46 | 0.38 |
| 11.32 | 1.41 | 1.36 | 1.30 | 1.12 | 1.05 | 0.95 | 0.87 | 0.75 | 0.75 | 0.66 | 0.62 |
| 11.52 | 1.40 | 1.17 | 1.08 | 0.87 | 0.88 | 0.71 | 0.69 | 0.64 | 0.53 | 0.55 | 0.32 |
| 11.72 | 1.16 | 1.19 | 0.99 | 0.86 | 0.84 | 0.86 | 0.63 | 0.67 | 0.58 | 0.41 | 0.34 |
| 11.92 | 1.17 | 1.00 | 0.92 | 0.92 | 0.80 | 0.64 | 0.63 | 0.47 | 0.52 | 0.40 | 0.36 |
| 12.12 | 1.31 | 1.27 | 1.14 | 0.96 | 0.93 | 0.77 | 0.65 | 0.56 | 0.51 | 0.46 | 0.41 |
| 12.32 | 1.37 | 1.18 | 1.09 | 1.00 | 0.95 | 0.93 | 0.87 | 0.64 | 0.61 | 0.53 | 0.40 |
| 12.52 | 1.18 | 1.11 | 1.00 | 0.94 | 0.75 | 0.72 | 0.60 | 0.54 | 0.67 | 0.46 | 0.34 |
| 12.72 | 1.59 | 1.41 | 1.21 | 1.06 | 1.03 | 0.86 | 0.87 | 0.85 | 0.76 | 0.64 | 0.56 |
| 12.92 | 1.25 | 1.22 | 1.16 | 0.93 | 0.91 | 0.79 | 0.69 | 0.59 | 0.60 | 0.53 | 0.48 |
| 13.12 | 1.26 | 1.15 | 0.94 | 0.84 | 0.93 | 0.78 | 0.70 | 0.52 | 0.47 | 0.40 | 0.29 |
| 13.32 | 1.26 | 1.11 | 0.93 | 0.89 | 0.83 | 0.61 | 0.63 | 0.48 | 0.32 | 0.40 | 0.18 |
| 13.52 | 1.29 | 1.18 | 1.15 | 0.94 | 0.89 | 0.78 | 0.63 | 0.68 | 0.57 | 0.53 | 0.42 |
| 13.72 | 1.43 | 1.34 | 1.05 | 0.94 | 0.85 | 0.78 | 0.79 | 0.82 | 0.62 | 0.53 | 0.48 |
| 13.92 | 1.20 | 1.17 | 1.00 | 0.94 | 0.86 | 0.74 | 0.66 | 0.67 | 0.44 | 0.47 | 0.34 |
| 14.00 | 1.38 | 1.24 | 1.13 | 0.96 | 0.95 | 0.82 | 0.76 | 0.67 | 0.71 | 0.59 | 0.53 |
| 14.08 | 1.36 | 1.20 | 0.87 | 0.88 | 0.86 | 0.80 | 0.63 | 0.56 | 0.51 | 0.41 | 0.36 |
| 14.17 | 1.34 | 1.12 | 0.92 | 0.77 | 0.71 | 0.56 | 0.57 | 0.67 | 0.37 | 0.48 | 0.38 |
| 14.27 | 1.32 | 1.22 | 0.98 | 0.97 | 0.91 | 0.68 | 0.58 | 0.53 | 0.59 | 0.48 | 0.32 |
| 14.38 | 1.27 | 1.21 | 0.96 | 0.95 | 0.88 | 0.77 | 0.81 | 0.66 | 0.57 | 0.52 | 0.32 |
| 14.49 | 1.27 | 1.06 | 1.01 | 0.84 | 0.86 | 0.69 | 0.52 | 0.56 | 0.56 | 0.36 | 0.33 |
| 14.61 | 1.14 | 1.08 | 0.94 | 0.81 | 0.73 | 0.58 | 0.64 | 0.52 | 0.40 | 0.41 | 0.26 |
| 14.75 | 1.15 | 1.10 | 0.94 | 0.85 | 0.72 | 0.60 | 0.55 | 0.40 | 0.49 | 0.43 | 0.27 |
| 14.89 | 1.55 | 1.36 | 1.24 | 1.15 | 1.01 | 1.00 | 0.78 | 0.69 | 0.73 | 0.62 | 0.54 |
| 15.05 | 1.21 | 1.08 | 0.95 | 0.90 | 0.84 | 0.70 | 0.74 | 0.66 | 0.45 | 0.49 | 0.43 |
| 15.21 | 1.41 | 1.32 | 1.20 | 1.00 | 1.00 | 0.97 | 0.70 | 0.61 | 0.63 | 0.50 | 0.48 |
| 15.39 | 1.18 | 1.27 | 1.08 | 0.85 | 0.91 | 0.72 | 0.70 | 0.62 | 0.52 | 0.49 | 0.37 |

|        |      |      |      |      |      |       |       |       |       |       |       |
|--------|------|------|------|------|------|-------|-------|-------|-------|-------|-------|
| 15.59  | 1.22 | 1.09 | 1.09 | 0.86 | 0.80 | 0.65  | 0.57  | 0.42  | 0.35  | 0.38  | 0.30  |
| 15.80  | 1.37 | 1.22 | 1.12 | 1.00 | 0.85 | 0.70  | 0.76  | 0.64  | 0.52  | 0.61  | 0.40  |
| 16.02  | 1.24 | 1.13 | 1.03 | 0.88 | 0.79 | 0.61  | 0.71  | 0.68  | 0.40  | 0.43  | 0.29  |
| 16.27  | 1.33 | 1.14 | 1.06 | 0.97 | 0.98 | 0.76  | 0.61  | 0.60  | 0.58  | 0.43  | 0.31  |
| 16.53  | 1.26 | 1.11 | 0.99 | 0.81 | 0.75 | 0.67  | 0.60  | 0.47  | 0.46  | 0.40  | 0.30  |
| 16.81  | 1.18 | 1.06 | 0.91 | 0.87 | 0.73 | 0.50  | 0.46  | 0.55  | 0.38  | 0.36  | 0.35  |
| 17.12  | 1.35 | 1.20 | 1.03 | 0.88 | 0.94 | 0.75  | 0.61  | 0.49  | 0.50  | 0.42  | 0.41  |
| 17.45  | 1.12 | 1.02 | 0.89 | 0.72 | 0.65 | 0.59  | 0.60  | 0.41  | 0.37  | 0.32  | 0.22  |
| 17.81  | 1.32 | 1.15 | 0.98 | 0.86 | 0.82 | 0.70  | 0.66  | 0.54  | 0.45  | 0.41  | 0.41  |
| 18.19  | 1.36 | 1.21 | 1.02 | 0.90 | 0.86 | 0.77  | 0.65  | 0.53  | 0.55  | 0.49  | 0.38  |
| 18.60  | 1.27 | 1.31 | 1.05 | 1.00 | 0.86 | 0.66  | 0.66  | 0.54  | 0.54  | 0.45  | 0.49  |
| 19.05  | 1.19 | 1.21 | 1.08 | 1.00 | 0.85 | 0.71  | 0.58  | 0.56  | 0.41  | 0.40  | 0.40  |
| 19.53  | 1.14 | 1.23 | 0.94 | 0.83 | 0.75 | 0.66  | 0.53  | 0.41  | 0.40  | 0.32  | 0.28  |
| 20.05  | 1.12 | 1.02 | 0.82 | 0.71 | 0.68 | 0.50  | 0.46  | 0.41  | 0.31  | 0.21  | 0.27  |
| 20.61  | 1.24 | 1.10 | 1.09 | 0.94 | 0.83 | 0.64  | 0.47  | 0.59  | 0.47  | 0.44  | 0.25  |
| 21.22  | 1.20 | 1.18 | 0.98 | 0.90 | 0.86 | 0.80  | 0.54  | 0.47  | 0.48  | 0.35  | 0.37  |
| 21.87  | 1.12 | 1.01 | 0.88 | 0.79 | 0.72 | 0.58  | 0.48  | 0.45  | 0.43  | 0.24  | 0.06  |
| 22.57  | 1.16 | 1.05 | 1.00 | 0.83 | 0.72 | 0.64  | 0.74  | 0.55  | 0.51  | 0.36  | 0.34  |
| 23.33  | 1.26 | 1.08 | 1.06 | 0.89 | 0.88 | 0.69  | 0.60  | 0.44  | 0.51  | 0.32  | 0.23  |
| 24.15  | 1.25 | 1.16 | 0.85 | 0.81 | 0.67 | 0.64  | 0.50  | 0.42  | 0.32  | 0.30  | 0.29  |
| 25.03  | 1.11 | 1.08 | 0.92 | 0.72 | 0.75 | 0.56  | 0.51  | 0.45  | 0.53  | 0.32  | 0.26  |
| 25.98  | 1.01 | 1.01 | 0.77 | 0.75 | 0.78 | 0.54  | 0.50  | 0.45  | 0.36  | 0.29  | 0.17  |
| 27.01  | 1.08 | 0.99 | 0.80 | 0.66 | 0.63 | 0.45  | 0.40  | 0.36  | 0.36  | 0.24  | 0.12  |
| 28.11  | 1.10 | 0.97 | 0.92 | 0.69 | 0.69 | 0.65  | 0.52  | 0.41  | 0.34  | 0.44  | 0.26  |
| 29.30  | 1.16 | 1.04 | 0.89 | 0.81 | 0.74 | 0.57  | 0.50  | 0.50  | 0.42  | 0.24  | 0.33  |
| 30.59  | 0.98 | 0.98 | 0.78 | 0.77 | 0.71 | 0.42  | 0.46  | 0.38  | 0.20  | 0.23  | 0.16  |
| 31.98  | 0.93 | 0.82 | 0.64 | 0.56 | 0.60 | 0.44  | 0.37  | 0.27  | 0.11  | 0.10  | 0.08  |
| 33.47  | 1.05 | 0.89 | 0.90 | 0.61 | 0.61 | 0.49  | 0.48  | 0.39  | 0.37  | 0.35  | 0.16  |
| 35.09  | 1.00 | 0.96 | 0.80 | 0.78 | 0.66 | 0.48  | 0.38  | 0.33  | 0.27  | 0.15  | 0.17  |
| 36.83  | 1.05 | 0.95 | 0.87 | 0.65 | 0.61 | 0.48  | 0.29  | 0.31  | 0.21  | 0.13  | 0.05  |
| 38.71  | 1.02 | 0.97 | 0.78 | 0.63 | 0.63 | 0.46  | 0.36  | 0.15  | 0.32  | 0.14  | 0.18  |
| 40.73  | 1.18 | 0.94 | 0.89 | 0.68 | 0.70 | 0.57  | 0.40  | 0.32  | 0.31  | 0.27  | 0.12  |
| 42.92  | 1.11 | 0.91 | 0.80 | 0.70 | 0.62 | 0.50  | 0.50  | 0.36  | 0.27  | 0.27  | 0.16  |
| 45.27  | 1.00 | 1.09 | 0.82 | 0.62 | 0.55 | 0.42  | 0.45  | 0.45  | 0.37  | 0.24  | 0.14  |
| 47.81  | 1.05 | 0.95 | 0.68 | 0.64 | 0.58 | 0.47  | 0.43  | 0.22  | 0.29  | 0.12  | 0.09  |
| 50.55  | 0.67 | 0.73 | 0.49 | 0.38 | 0.40 | 0.24  | 0.15  | 0.20  | 0.14  | -0.01 | -0.13 |
| 53.51  | 0.99 | 0.93 | 0.72 | 0.63 | 0.52 | 0.57  | 0.36  | 0.31  | 0.24  | 0.25  | 0.10  |
| 56.69  | 0.99 | 0.85 | 0.58 | 0.52 | 0.53 | 0.33  | 0.24  | 0.16  | 0.13  | -0.06 | -0.09 |
| 60.13  | 0.72 | 0.65 | 0.45 | 0.46 | 0.38 | 0.30  | 0.14  | 0.12  | 0.05  | -0.03 | -0.10 |
| 63.84  | 0.80 | 0.65 | 0.54 | 0.44 | 0.42 | 0.22  | 0.14  | 0.03  | 0.11  | -0.02 | -0.10 |
| 67.83  | 0.72 | 0.65 | 0.55 | 0.30 | 0.35 | 0.17  | 0.04  | 0.05  | -0.04 | -0.11 | -0.22 |
| 72.15  | 0.71 | 0.72 | 0.53 | 0.28 | 0.30 | 0.13  | 0.24  | 0.12  | -0.02 | -0.11 | -0.10 |
| 76.80  | 0.60 | 0.53 | 0.42 | 0.30 | 0.17 | 0.04  | 0.04  | -0.04 | -0.10 | -0.17 | -0.24 |
| 81.81  | 0.71 | 0.72 | 0.59 | 0.43 | 0.36 | 0.28  | 0.15  | 0.10  | 0.04  | 0.01  | -0.27 |
| 87.22  | 0.81 | 0.64 | 0.38 | 0.29 | 0.30 | 0.31  | 0.05  | 0.05  | 0.00  | -0.02 | -0.20 |
| 93.06  | 0.60 | 0.57 | 0.34 | 0.23 | 0.13 | 0.03  | -0.08 | -0.08 | -0.18 | -0.18 | -0.25 |
| 99.35  | 0.69 | 0.68 | 0.34 | 0.28 | 0.27 | 0.09  | 0.05  | 0.02  | -0.16 | -0.15 | -0.28 |
| 106.13 | 0.61 | 0.62 | 0.30 | 0.12 | 0.07 | 0.01  | -0.09 | -0.11 | -0.06 | -0.28 | -0.32 |
| 113.45 | 0.81 | 0.62 | 0.47 | 0.46 | 0.37 | 0.14  | 0.09  | -0.09 | -0.11 | -0.08 | -0.16 |
| 121.34 | 0.62 | 0.53 | 0.43 | 0.23 | 0.11 | -0.01 | -0.12 | -0.12 | -0.21 | -0.36 | -0.40 |

|         |       |       |       |       |       |       |       |       |       |       |       |
|---------|-------|-------|-------|-------|-------|-------|-------|-------|-------|-------|-------|
| 129.86  | 0.48  | 0.36  | 0.08  | 0.03  | 0.02  | -0.21 | -0.28 | -0.25 | -0.43 | -0.49 | -0.50 |
| 139.04  | 0.55  | 0.56  | 0.36  | 0.12  | 0.07  | -0.03 | -0.08 | -0.25 | -0.23 | -0.29 | -0.46 |
| 148.94  | 0.43  | 0.20  | 0.09  | 0.07  | -0.02 | -0.09 | -0.24 | -0.23 | -0.30 | -0.40 | -0.49 |
| 159.62  | 0.53  | 0.39  | 0.24  | 0.10  | -0.07 | -0.12 | -0.17 | -0.24 | -0.29 | -0.48 | -0.46 |
| 171.14  | 0.62  | 0.36  | 0.19  | 0.02  | 0.09  | -0.25 | -0.27 | -0.27 | -0.35 | -0.36 | -0.45 |
| 183.56  | 0.44  | 0.19  | 0.07  | -0.03 | -0.09 | -0.18 | -0.29 | -0.32 | -0.36 | -0.51 | -0.57 |
| 196.96  | 0.38  | 0.17  | 0.11  | 0.03  | -0.10 | -0.18 | -0.34 | -0.32 | -0.40 | -0.53 | -0.59 |
| 211.41  | 0.34  | 0.20  | 0.06  | 0.03  | 0.02  | -0.19 | -0.21 | -0.40 | -0.37 | -0.52 | -0.52 |
| 226.99  | 0.33  | 0.20  | 0.07  | -0.04 | -0.03 | -0.16 | -0.23 | -0.36 | -0.45 | -0.54 | -0.64 |
| 243.80  | 0.33  | 0.10  | -0.04 | -0.03 | -0.20 | -0.32 | -0.40 | -0.43 | -0.50 | -0.55 | -0.56 |
| 261.93  | 0.31  | 0.21  | 0.05  | -0.05 | -0.22 | -0.19 | -0.33 | -0.36 | -0.40 | -0.47 | -0.64 |
| 281.48  | 0.27  | 0.05  | -0.04 | -0.21 | -0.18 | -0.32 | -0.37 | -0.59 | -0.50 | -0.70 | -0.72 |
| 302.56  | 0.15  | 0.02  | -0.04 | -0.19 | -0.09 | -0.36 | -0.47 | -0.46 | -0.44 | -0.54 | -0.76 |
| 325.30  | 0.18  | 0.12  | -0.12 | -0.15 | -0.23 | -0.30 | -0.32 | -0.39 | -0.47 | -0.58 | -0.60 |
| 349.83  | 0.16  | 0.16  | -0.06 | -0.17 | -0.08 | -0.26 | -0.40 | -0.50 | -0.44 | -0.52 | -0.67 |
| 376.28  | 0.21  | 0.10  | -0.08 | -0.23 | -0.22 | -0.42 | -0.52 | -0.51 | -0.51 | -0.64 | -0.76 |
| 404.81  | 0.13  | 0.17  | -0.11 | -0.20 | -0.23 | -0.30 | -0.41 | -0.49 | -0.43 | -0.63 | -0.53 |
| 435.58  | 0.16  | 0.12  | -0.01 | -0.17 | -0.29 | -0.39 | -0.42 | -0.47 | -0.47 | -0.53 | -0.58 |
| 468.76  | 0.04  | 0.14  | -0.14 | -0.27 | -0.20 | -0.36 | -0.41 | -0.45 | -0.45 | -0.53 | -0.66 |
| 504.55  | -0.01 | -0.08 | -0.10 | -0.22 | -0.26 | -0.40 | -0.48 | -0.48 | -0.66 | -0.70 | -0.67 |
| 543.15  | 0.14  | -0.05 | -0.11 | -0.05 | -0.19 | -0.30 | -0.33 | -0.45 | -0.37 | -0.54 | -0.63 |
| 584.78  | -0.03 | -0.12 | -0.10 | -0.27 | -0.32 | -0.47 | -0.45 | -0.61 | -0.78 | -0.57 | -0.61 |
| 629.68  | 0.18  | 0.02  | -0.13 | -0.16 | -0.21 | -0.22 | -0.37 | -0.37 | -0.55 | -0.58 | -0.49 |
| 678.10  | 0.14  | 0.01  | -0.19 | -0.14 | -0.30 | -0.39 | -0.35 | -0.46 | -0.48 | -0.58 | -0.65 |
| 730.33  | 0.32  | 0.22  | -0.02 | -0.07 | -0.17 | -0.25 | -0.20 | -0.35 | -0.38 | -0.45 | -0.49 |
| 786.65  | 0.20  | 0.07  | -0.14 | -0.19 | -0.07 | -0.18 | -0.26 | -0.36 | -0.42 | -0.49 | -0.35 |
| 847.40  | 0.06  | -0.03 | -0.22 | -0.19 | -0.24 | -0.31 | -0.40 | -0.43 | -0.53 | -0.57 | -0.65 |
| 912.92  | 0.06  | 0.03  | -0.10 | -0.17 | -0.18 | -0.40 | -0.40 | -0.45 | -0.48 | -0.49 | -0.62 |
| 983.58  | 0.22  | 0.15  | 0.04  | -0.06 | -0.11 | -0.22 | -0.29 | -0.38 | -0.43 | -0.34 | -0.40 |
| 1059.78 | 0.13  | 0.21  | -0.04 | -0.04 | -0.11 | -0.10 | -0.17 | -0.33 | -0.28 | -0.34 | -0.42 |
| 1141.98 | 0.19  | 0.07  | -0.04 | -0.16 | -0.15 | -0.36 | -0.30 | -0.29 | -0.41 | -0.43 | -0.47 |
| 1230.62 | 0.10  | 0.09  | -0.08 | -0.20 | -0.14 | -0.16 | -0.20 | -0.31 | -0.33 | -0.36 | -0.47 |
| 1326.23 | 0.24  | 0.18  | 0.05  | -0.04 | -0.02 | -0.17 | -0.22 | -0.18 | -0.17 | -0.21 | -0.38 |
| 1429.34 | 0.19  | 0.20  | 0.02  | -0.03 | 0.03  | -0.11 | -0.20 | -0.24 | -0.24 | -0.29 | -0.35 |
| 1540.54 | 0.17  | 0.15  | 0.06  | 0.07  | -0.03 | -0.03 | -0.15 | -0.16 | -0.19 | -0.22 | -0.26 |
| 1660.48 | 0.18  | 0.08  | -0.02 | -0.03 | -0.12 | -0.12 | -0.24 | -0.30 | -0.16 | -0.24 | -0.23 |
| 1789.83 | 0.22  | 0.18  | 0.07  | -0.04 | -0.06 | -0.02 | -0.15 | -0.20 | -0.18 | -0.13 | -0.20 |
| 1929.34 | 0.33  | 0.22  | 0.06  | 0.06  | 0.05  | -0.04 | -0.01 | -0.08 | -0.15 | -0.15 | -0.06 |
| 2079.80 | 0.31  | 0.14  | 0.12  | 0.00  | 0.09  | 0.01  | 0.00  | -0.01 | -0.07 | -0.07 | -0.20 |
| 2242.08 | 0.29  | 0.32  | 0.07  | 0.04  | -0.01 | 0.07  | -0.04 | -0.09 | -0.06 | -0.12 | -0.16 |
| 2417.10 | 0.32  | 0.20  | 0.07  | 0.24  | 0.11  | -0.08 | -0.01 | 0.11  | -0.04 | 0.00  | -0.14 |
| 2605.85 | 0.32  | 0.26  | 0.26  | 0.20  | 0.24  | 0.16  | 0.12  | 0.04  | 0.12  | 0.05  | -0.02 |
| 2809.43 | 0.28  | 0.24  | 0.14  | 0.17  | 0.12  | 0.12  | 0.01  | -0.02 | -0.04 | 0.00  | -0.01 |
| 3028.99 | 0.26  | 0.23  | 0.16  | 0.17  | 0.12  | 0.02  | 0.13  | 0.06  | 0.09  | -0.02 | 0.02  |
| 3265.79 | 0.29  | 0.33  | 0.19  | 0.17  | 0.19  | 0.06  | 0.12  | 0.10  | 0.05  | 0.09  | 0.12  |
| 3521.18 | 0.31  | 0.27  | 0.28  | 0.17  | 0.23  | 0.21  | 0.27  | 0.21  | 0.09  | 0.19  | -0.03 |
| 3796.62 | 0.30  | 0.24  | 0.12  | 0.10  | 0.21  | -0.07 | 0.06  | 0.02  | 0.09  | 0.05  | 0.05  |

| Wavelength<br>Time<br>(ps) | 460.15 | 461.56 | 462.97 | 464.38 | 465.78 | 467.19 | 468.60 | 470.01 | 471.42 | 472.83 | 474.24 |
|----------------------------|--------|--------|--------|--------|--------|--------|--------|--------|--------|--------|--------|
| -3.28                      | -0.13  | -0.12  | -0.12  | -0.17  | -0.18  | -0.14  | -0.10  | -0.06  | -0.09  | -0.10  | -0.11  |
| -2.78                      | -0.06  | -0.11  | -0.12  | -0.08  | -0.08  | 0.02   | -0.02  | -0.12  | -0.12  | -0.14  | -0.08  |
| -2.28                      | 0.07   | -0.03  | -0.05  | -0.09  | 0.06   | 0.06   | -0.09  | 0.06   | 0.07   | -0.08  | 0.04   |
| -1.78                      | 0.08   | 0.20   | 0.21   | 0.14   | 0.15   | 0.13   | 0.12   | 0.12   | 0.11   | 0.19   | 0.19   |
| -1.28                      | -0.01  | 0.01   | 0.00   | 0.07   | 0.00   | -0.09  | -0.02  | 0.00   | -0.13  | -0.06  | -0.11  |
| -0.78                      | -0.15  | -0.10  | -0.10  | -0.11  | -0.08  | -0.11  | 0.05   | -0.04  | 0.00   | -0.03  | -0.04  |
| -0.28                      | 0.02   | -0.03  | 0.03   | 0.02   | -0.02  | -0.07  | -0.09  | 0.02   | -0.01  | 0.00   | -0.01  |
| 0.22                       | 0.16   | 0.12   | 0.10   | 0.11   | 0.06   | 0.17   | 0.12   | -0.03  | 0.07   | 0.11   | 0.07   |
| 0.32                       | -0.01  | 0.01   | -0.08  | -0.06  | -0.09  | -0.04  | -0.05  | -0.10  | -0.07  | -0.04  | -0.16  |
| 0.42                       | 0.03   | 0.06   | 0.12   | 0.18   | 0.18   | 0.06   | 0.08   | 0.16   | 0.16   | 0.15   | 0.21   |
| 0.52                       | 0.03   | 0.01   | -0.03  | -0.04  | -0.06  | 0.07   | -0.01  | -0.01  | 0.04   | 0.04   | -0.04  |
| 0.62                       | 0.01   | -0.02  | 0.04   | 0.04   | 0.05   | 0.04   | 0.00   | 0.09   | 0.00   | 0.06   | 0.08   |
| 0.72                       | 0.27   | 0.31   | 0.25   | 0.27   | 0.24   | 0.28   | 0.22   | 0.26   | 0.21   | 0.29   | 0.22   |
| 0.77                       | 0.08   | 0.02   | 0.13   | 0.02   | 0.08   | 0.10   | 0.10   | 0.04   | 0.09   | 0.21   | 0.11   |
| 0.82                       | 0.00   | -0.01  | 0.03   | 0.07   | 0.18   | 0.00   | -0.01  | 0.01   | 0.10   | 0.16   | -0.02  |
| 0.87                       | -0.12  | -0.11  | -0.01  | -0.13  | -0.07  | -0.06  | -0.08  | -0.12  | -0.05  | -0.10  | -0.07  |
| 0.92                       | 0.03   | -0.10  | -0.07  | -0.12  | -0.01  | -0.03  | 0.05   | 0.05   | 0.10   | -0.01  | 0.02   |
| 0.97                       | -0.09  | -0.12  | -0.06  | -0.06  | -0.03  | -0.09  | -0.01  | -0.15  | -0.08  | 0.01   | -0.05  |
| 1.02                       | -0.02  | 0.07   | -0.05  | -0.12  | -0.02  | -0.02  | -0.03  | -0.06  | 0.02   | -0.12  | 0.07   |
| 1.07                       | 0.10   | 0.23   | 0.07   | 0.12   | 0.15   | 0.04   | 0.10   | 0.10   | 0.17   | 0.07   | 0.11   |
| 1.12                       | -0.17  | -0.20  | -0.22  | -0.16  | -0.14  | -0.13  | -0.09  | -0.19  | -0.16  | -0.15  | -0.14  |
| 1.17                       | -0.03  | -0.20  | -0.12  | 0.02   | 0.03   | 0.02   | -0.05  | -0.09  | -0.04  | -0.09  | -0.09  |
| 1.22                       | -0.30  | -0.23  | -0.15  | -0.08  | -0.12  | -0.15  | -0.08  | -0.07  | -0.01  | -0.07  | 0.02   |
| 1.27                       | 0.88   | 0.78   | 0.46   | 0.25   | 0.20   | 0.11   | -0.10  | -0.16  | -0.14  | -0.25  | -0.20  |
| 1.32                       | 4.32   | 4.04   | 3.41   | 3.10   | 2.87   | 2.39   | 1.99   | 1.65   | 1.27   | 0.96   | 0.67   |
| 1.37                       | 4.73   | 4.81   | 4.63   | 4.66   | 4.47   | 4.44   | 4.39   | 4.27   | 4.22   | 3.98   | 3.64   |
| 1.42                       | 3.49   | 3.33   | 3.35   | 3.37   | 3.39   | 3.18   | 3.28   | 3.33   | 3.24   | 3.42   | 3.39   |
| 1.47                       | 2.78   | 2.61   | 2.39   | 2.34   | 2.25   | 2.00   | 2.07   | 1.92   | 1.84   | 1.81   | 1.67   |
| 1.52                       | 2.41   | 2.26   | 2.06   | 1.89   | 1.93   | 1.65   | 1.53   | 1.48   | 1.39   | 1.30   | 1.11   |
| 1.57                       | 2.30   | 2.21   | 2.09   | 1.96   | 1.77   | 1.66   | 1.41   | 1.40   | 1.30   | 1.14   | 1.04   |
| 1.62                       | 2.29   | 2.21   | 2.03   | 1.92   | 1.84   | 1.66   | 1.47   | 1.37   | 1.24   | 1.19   | 0.88   |
| 1.67                       | 2.15   | 2.12   | 1.73   | 1.59   | 1.52   | 1.44   | 1.33   | 1.26   | 1.03   | 0.97   | 0.84   |
| 1.72                       | 2.13   | 2.11   | 1.92   | 1.57   | 1.59   | 1.43   | 1.25   | 1.11   | 1.03   | 0.91   | 0.80   |
| 1.77                       | 2.11   | 2.04   | 1.69   | 1.66   | 1.52   | 1.39   | 1.17   | 1.02   | 0.93   | 0.82   | 0.78   |
| 1.82                       | 2.09   | 2.02   | 1.73   | 1.68   | 1.49   | 1.58   | 1.28   | 1.19   | 1.05   | 0.92   | 0.71   |
| 1.87                       | 2.28   | 1.98   | 1.91   | 1.74   | 1.60   | 1.54   | 1.30   | 1.21   | 1.14   | 1.01   | 0.87   |
| 1.92                       | 2.12   | 1.94   | 1.74   | 1.64   | 1.48   | 1.37   | 1.24   | 1.12   | 1.07   | 0.95   | 0.72   |
| 1.97                       | 2.05   | 1.94   | 1.60   | 1.64   | 1.44   | 1.28   | 1.15   | 0.98   | 0.92   | 0.91   | 0.67   |
| 2.02                       | 2.03   | 1.93   | 1.67   | 1.59   | 1.42   | 1.35   | 1.22   | 1.09   | 1.07   | 0.92   | 0.81   |
| 2.07                       | 1.97   | 1.82   | 1.59   | 1.27   | 1.43   | 1.16   | 1.18   | 1.01   | 0.95   | 0.78   | 0.67   |
| 2.12                       | 2.19   | 1.95   | 1.78   | 1.74   | 1.61   | 1.50   | 1.40   | 1.31   | 1.14   | 0.98   | 0.81   |
| 2.17                       | 2.10   | 2.05   | 1.92   | 1.71   | 1.66   | 1.55   | 1.43   | 1.29   | 1.19   | 0.95   | 0.86   |
| 2.22                       | 2.08   | 1.88   | 1.68   | 1.54   | 1.48   | 1.22   | 1.23   | 1.05   | 0.96   | 0.84   | 0.77   |
| 2.27                       | 2.05   | 2.02   | 1.80   | 1.63   | 1.60   | 1.33   | 1.22   | 1.28   | 1.14   | 0.97   | 0.89   |
| 2.32                       | 1.96   | 1.87   | 1.63   | 1.49   | 1.44   | 1.35   | 1.22   | 1.24   | 1.06   | 0.88   | 0.81   |
| 2.37                       | 1.98   | 1.82   | 1.67   | 1.49   | 1.32   | 1.24   | 1.09   | 1.07   | 0.99   | 0.86   | 0.62   |
| 2.42                       | 1.97   | 1.88   | 1.72   | 1.54   | 1.47   | 1.34   | 1.26   | 1.12   | 0.94   | 0.91   | 0.75   |



|      |      |      |      |      |      |      |      |      |      |      |      |
|------|------|------|------|------|------|------|------|------|------|------|------|
| 2.47 | 1.82 | 1.67 | 1.44 | 1.49 | 1.35 | 1.18 | 1.09 | 1.05 | 0.99 | 0.81 | 0.71 |
| 2.52 | 2.01 | 1.76 | 1.72 | 1.57 | 1.43 | 1.32 | 1.14 | 0.96 | 0.96 | 0.88 | 0.75 |
| 2.57 | 1.67 | 1.64 | 1.43 | 1.37 | 1.20 | 0.99 | 1.03 | 0.92 | 0.86 | 0.68 | 0.60 |
| 2.62 | 1.97 | 1.84 | 1.66 | 1.60 | 1.58 | 1.34 | 1.15 | 1.14 | 1.05 | 1.00 | 0.90 |
| 2.67 | 1.80 | 1.71 | 1.46 | 1.29 | 1.36 | 1.15 | 1.08 | 0.98 | 0.73 | 0.77 | 0.68 |
| 2.72 | 1.80 | 1.79 | 1.56 | 1.42 | 1.38 | 1.21 | 1.15 | 1.04 | 1.01 | 0.91 | 0.71 |
| 2.77 | 2.04 | 1.98 | 1.75 | 1.73 | 1.60 | 1.48 | 1.44 | 1.28 | 1.21 | 1.03 | 0.89 |
| 2.82 | 1.98 | 1.83 | 1.58 | 1.37 | 1.27 | 1.22 | 1.11 | 1.04 | 0.98 | 0.96 | 0.77 |
| 2.87 | 1.86 | 1.60 | 1.47 | 1.25 | 1.19 | 1.12 | 1.04 | 0.93 | 0.79 | 0.87 | 0.67 |
| 2.92 | 1.86 | 1.70 | 1.60 | 1.48 | 1.39 | 1.15 | 1.10 | 1.04 | 1.01 | 0.82 | 0.76 |
| 2.97 | 1.73 | 1.60 | 1.45 | 1.35 | 1.16 | 1.24 | 1.11 | 0.97 | 0.78 | 0.86 | 0.57 |
| 3.02 | 1.89 | 1.72 | 1.58 | 1.46 | 1.39 | 1.23 | 1.09 | 0.98 | 0.92 | 0.77 | 0.82 |
| 3.07 | 1.86 | 1.78 | 1.52 | 1.51 | 1.38 | 1.24 | 1.13 | 0.90 | 0.99 | 0.89 | 0.73 |
| 3.12 | 1.82 | 1.71 | 1.51 | 1.40 | 1.43 | 1.21 | 1.09 | 0.91 | 0.81 | 0.91 | 0.72 |
| 3.17 | 1.85 | 1.71 | 1.58 | 1.39 | 1.31 | 1.08 | 1.12 | 0.92 | 0.86 | 0.87 | 0.80 |
| 3.22 | 1.79 | 1.74 | 1.50 | 1.39 | 1.27 | 1.14 | 1.08 | 0.91 | 0.85 | 0.82 | 0.62 |
| 3.27 | 1.81 | 1.61 | 1.44 | 1.34 | 1.42 | 1.10 | 1.11 | 1.01 | 0.78 | 0.82 | 0.74 |
| 3.32 | 1.87 | 1.74 | 1.58 | 1.48 | 1.47 | 1.12 | 1.18 | 1.06 | 1.02 | 0.88 | 0.69 |
| 3.37 | 1.58 | 1.50 | 1.56 | 1.30 | 1.21 | 1.00 | 0.82 | 0.81 | 0.81 | 0.59 | 0.60 |
| 3.42 | 1.86 | 1.67 | 1.62 | 1.28 | 1.37 | 1.14 | 1.02 | 0.90 | 0.83 | 0.78 | 0.76 |
| 3.47 | 1.66 | 1.58 | 1.39 | 1.26 | 1.19 | 0.95 | 0.86 | 0.85 | 0.72 | 0.64 | 0.59 |
| 3.52 | 1.67 | 1.56 | 1.37 | 1.27 | 1.23 | 0.93 | 0.95 | 0.82 | 0.76 | 0.66 | 0.63 |
| 3.57 | 1.79 | 1.61 | 1.43 | 1.19 | 1.30 | 0.99 | 1.03 | 0.90 | 0.81 | 0.76 | 0.56 |
| 3.62 | 1.64 | 1.73 | 1.52 | 1.36 | 1.33 | 1.24 | 0.93 | 0.98 | 0.89 | 0.83 | 0.70 |
| 3.67 | 1.58 | 1.51 | 1.34 | 1.21 | 1.14 | 1.02 | 0.90 | 0.84 | 0.80 | 0.59 | 0.51 |
| 3.72 | 1.69 | 1.54 | 1.44 | 1.37 | 1.20 | 1.15 | 0.94 | 0.76 | 0.86 | 0.76 | 0.60 |
| 3.92 | 1.71 | 1.64 | 1.45 | 1.20 | 1.19 | 1.00 | 1.04 | 0.99 | 0.93 | 0.73 | 0.70 |
| 4.12 | 1.60 | 1.51 | 1.35 | 1.32 | 1.17 | 1.14 | 1.01 | 0.85 | 0.78 | 0.75 | 0.61 |
| 4.32 | 1.71 | 1.63 | 1.32 | 1.22 | 1.22 | 1.10 | 1.01 | 0.92 | 0.79 | 0.68 | 0.64 |
| 4.52 | 1.62 | 1.65 | 1.21 | 1.25 | 1.22 | 1.04 | 0.90 | 0.79 | 0.70 | 0.64 | 0.51 |
| 4.72 | 1.61 | 1.51 | 1.18 | 1.12 | 1.06 | 0.88 | 0.86 | 0.80 | 0.76 | 0.67 | 0.46 |
| 4.92 | 1.72 | 1.62 | 1.46 | 1.38 | 1.28 | 1.19 | 0.98 | 0.97 | 0.93 | 0.87 | 0.73 |
| 5.12 | 1.66 | 1.55 | 1.39 | 1.20 | 1.20 | 1.08 | 0.97 | 0.89 | 0.78 | 0.69 | 0.77 |
| 5.32 | 1.78 | 1.50 | 1.42 | 1.31 | 1.20 | 1.04 | 0.89 | 0.84 | 0.85 | 0.75 | 0.56 |
| 5.52 | 1.65 | 1.63 | 1.43 | 1.40 | 1.22 | 1.11 | 1.02 | 0.89 | 0.93 | 0.82 | 0.69 |
| 5.72 | 1.66 | 1.69 | 1.46 | 1.43 | 1.32 | 1.13 | 1.04 | 0.86 | 0.90 | 0.83 | 0.76 |
| 5.92 | 1.34 | 1.37 | 1.19 | 0.90 | 1.03 | 0.95 | 0.78 | 0.74 | 0.68 | 0.55 | 0.40 |
| 6.12 | 1.63 | 1.40 | 1.27 | 1.07 | 1.09 | 0.90 | 0.89 | 0.85 | 0.69 | 0.61 | 0.51 |
| 6.32 | 1.35 | 1.29 | 1.08 | 0.95 | 0.93 | 0.90 | 0.80 | 0.71 | 0.56 | 0.39 | 0.48 |
| 6.52 | 1.54 | 1.40 | 1.23 | 1.07 | 1.06 | 1.00 | 0.77 | 0.72 | 0.72 | 0.71 | 0.77 |
| 6.72 | 1.78 | 1.59 | 1.45 | 1.42 | 1.31 | 1.14 | 1.09 | 0.94 | 0.94 | 0.82 | 0.69 |
| 6.92 | 1.47 | 1.33 | 1.24 | 1.13 | 1.01 | 0.88 | 0.82 | 0.73 | 0.70 | 0.58 | 0.41 |
| 7.12 | 1.49 | 1.36 | 1.24 | 0.88 | 1.01 | 1.04 | 0.78 | 0.70 | 0.66 | 0.64 | 0.59 |
| 7.32 | 1.47 | 1.43 | 1.28 | 1.06 | 0.97 | 0.81 | 0.82 | 0.73 | 0.69 | 0.52 | 0.57 |
| 7.52 | 1.44 | 1.32 | 1.21 | 1.13 | 1.01 | 0.91 | 0.89 | 0.81 | 0.67 | 0.62 | 0.51 |
| 7.72 | 1.52 | 1.41 | 1.24 | 1.13 | 1.08 | 0.95 | 0.91 | 0.75 | 0.70 | 0.69 | 0.53 |
| 7.92 | 1.48 | 1.28 | 1.23 | 1.00 | 0.97 | 0.85 | 0.89 | 0.68 | 0.74 | 0.47 | 0.58 |
| 8.12 | 1.63 | 1.43 | 1.16 | 1.13 | 1.15 | 0.92 | 0.80 | 0.81 | 0.78 | 0.66 | 0.57 |
| 8.32 | 1.52 | 1.35 | 1.20 | 1.07 | 1.10 | 0.92 | 0.81 | 0.79 | 0.59 | 0.59 | 0.59 |
| 8.52 | 1.34 | 1.26 | 1.04 | 1.09 | 0.94 | 0.77 | 0.68 | 0.69 | 0.53 | 0.45 | 0.45 |

|       |      |      |      |      |      |      |      |      |      |      |      |
|-------|------|------|------|------|------|------|------|------|------|------|------|
| 8.72  | 1.34 | 1.24 | 1.10 | 1.04 | 0.79 | 0.73 | 0.68 | 0.70 | 0.67 | 0.42 | 0.35 |
| 8.92  | 1.37 | 1.32 | 1.12 | 0.88 | 0.89 | 0.67 | 0.67 | 0.66 | 0.54 | 0.46 | 0.46 |
| 9.12  | 1.45 | 1.31 | 1.15 | 1.03 | 0.99 | 0.83 | 0.76 | 0.69 | 0.57 | 0.60 | 0.43 |
| 9.32  | 1.31 | 1.28 | 1.17 | 1.02 | 0.83 | 0.80 | 0.81 | 0.68 | 0.61 | 0.52 | 0.49 |
| 9.52  | 1.41 | 1.38 | 1.10 | 0.97 | 0.96 | 0.74 | 0.72 | 0.75 | 0.56 | 0.69 | 0.31 |
| 9.72  | 1.31 | 1.25 | 1.02 | 0.90 | 0.86 | 0.86 | 0.76 | 0.56 | 0.62 | 0.40 | 0.45 |
| 9.92  | 1.35 | 1.24 | 1.17 | 0.96 | 0.99 | 0.78 | 0.80 | 0.75 | 0.72 | 0.53 | 0.45 |
| 10.12 | 1.28 | 1.39 | 1.06 | 1.03 | 0.77 | 0.75 | 0.77 | 0.58 | 0.53 | 0.53 | 0.43 |
| 10.32 | 1.18 | 1.17 | 0.96 | 0.83 | 0.82 | 0.63 | 0.66 | 0.69 | 0.41 | 0.42 | 0.52 |
| 10.52 | 1.11 | 1.22 | 1.06 | 0.93 | 0.84 | 0.74 | 0.68 | 0.51 | 0.54 | 0.46 | 0.31 |
| 10.72 | 1.47 | 1.33 | 1.11 | 1.00 | 0.94 | 0.78 | 0.83 | 0.78 | 0.63 | 0.62 | 0.52 |
| 10.92 | 1.33 | 1.26 | 1.10 | 0.96 | 0.90 | 0.71 | 0.72 | 0.74 | 0.50 | 0.45 | 0.42 |
| 11.12 | 1.29 | 1.18 | 0.95 | 0.86 | 0.89 | 0.73 | 0.61 | 0.53 | 0.47 | 0.46 | 0.38 |
| 11.32 | 1.41 | 1.36 | 1.30 | 1.12 | 1.05 | 0.95 | 0.87 | 0.75 | 0.75 | 0.66 | 0.62 |
| 11.52 | 1.40 | 1.17 | 1.08 | 0.87 | 0.88 | 0.71 | 0.69 | 0.64 | 0.53 | 0.55 | 0.32 |
| 11.72 | 1.16 | 1.19 | 0.99 | 0.86 | 0.84 | 0.86 | 0.63 | 0.67 | 0.58 | 0.41 | 0.34 |
| 11.92 | 1.17 | 1.00 | 0.92 | 0.92 | 0.80 | 0.64 | 0.63 | 0.47 | 0.52 | 0.40 | 0.36 |
| 12.12 | 1.31 | 1.27 | 1.14 | 0.96 | 0.93 | 0.77 | 0.65 | 0.56 | 0.51 | 0.46 | 0.41 |
| 12.32 | 1.37 | 1.18 | 1.09 | 1.00 | 0.95 | 0.93 | 0.87 | 0.64 | 0.61 | 0.53 | 0.40 |
| 12.52 | 1.18 | 1.11 | 1.00 | 0.94 | 0.75 | 0.72 | 0.60 | 0.54 | 0.67 | 0.46 | 0.34 |
| 12.72 | 1.59 | 1.41 | 1.21 | 1.06 | 1.03 | 0.86 | 0.87 | 0.85 | 0.76 | 0.64 | 0.56 |
| 12.92 | 1.25 | 1.22 | 1.16 | 0.93 | 0.91 | 0.79 | 0.69 | 0.59 | 0.60 | 0.53 | 0.48 |
| 13.12 | 1.26 | 1.15 | 0.94 | 0.84 | 0.93 | 0.78 | 0.70 | 0.52 | 0.47 | 0.40 | 0.29 |
| 13.32 | 1.26 | 1.11 | 0.93 | 0.89 | 0.83 | 0.61 | 0.63 | 0.48 | 0.32 | 0.40 | 0.18 |
| 13.52 | 1.29 | 1.18 | 1.15 | 0.94 | 0.89 | 0.78 | 0.63 | 0.68 | 0.57 | 0.53 | 0.42 |
| 13.72 | 1.43 | 1.34 | 1.05 | 0.94 | 0.85 | 0.78 | 0.79 | 0.82 | 0.62 | 0.53 | 0.48 |
| 13.92 | 1.20 | 1.17 | 1.00 | 0.94 | 0.86 | 0.74 | 0.66 | 0.67 | 0.44 | 0.47 | 0.34 |
| 14.00 | 1.38 | 1.24 | 1.13 | 0.96 | 0.95 | 0.82 | 0.76 | 0.67 | 0.71 | 0.59 | 0.53 |
| 14.08 | 1.36 | 1.20 | 0.87 | 0.88 | 0.86 | 0.80 | 0.63 | 0.56 | 0.51 | 0.41 | 0.36 |
| 14.17 | 1.34 | 1.12 | 0.92 | 0.77 | 0.71 | 0.56 | 0.57 | 0.67 | 0.37 | 0.48 | 0.38 |
| 14.27 | 1.32 | 1.22 | 0.98 | 0.97 | 0.91 | 0.68 | 0.58 | 0.53 | 0.59 | 0.48 | 0.32 |
| 14.38 | 1.27 | 1.21 | 0.96 | 0.95 | 0.88 | 0.77 | 0.81 | 0.66 | 0.57 | 0.52 | 0.32 |
| 14.49 | 1.27 | 1.06 | 1.01 | 0.84 | 0.86 | 0.69 | 0.52 | 0.56 | 0.56 | 0.36 | 0.33 |
| 14.61 | 1.14 | 1.08 | 0.94 | 0.81 | 0.73 | 0.58 | 0.64 | 0.52 | 0.40 | 0.41 | 0.26 |
| 14.75 | 1.15 | 1.10 | 0.94 | 0.85 | 0.72 | 0.60 | 0.55 | 0.40 | 0.49 | 0.43 | 0.27 |
| 14.89 | 1.55 | 1.36 | 1.24 | 1.15 | 1.01 | 1.00 | 0.78 | 0.69 | 0.73 | 0.62 | 0.54 |
| 15.05 | 1.21 | 1.08 | 0.95 | 0.90 | 0.84 | 0.70 | 0.74 | 0.66 | 0.45 | 0.49 | 0.43 |
| 15.21 | 1.41 | 1.32 | 1.20 | 1.00 | 1.00 | 0.97 | 0.70 | 0.61 | 0.63 | 0.50 | 0.48 |
| 15.39 | 1.18 | 1.27 | 1.08 | 0.85 | 0.91 | 0.72 | 0.70 | 0.62 | 0.52 | 0.49 | 0.37 |
| 15.59 | 1.22 | 1.09 | 1.09 | 0.86 | 0.80 | 0.65 | 0.57 | 0.42 | 0.35 | 0.38 | 0.30 |
| 15.80 | 1.37 | 1.22 | 1.12 | 1.00 | 0.85 | 0.70 | 0.76 | 0.64 | 0.52 | 0.61 | 0.40 |
| 16.02 | 1.24 | 1.13 | 1.03 | 0.88 | 0.79 | 0.61 | 0.71 | 0.68 | 0.40 | 0.43 | 0.29 |
| 16.27 | 1.33 | 1.14 | 1.06 | 0.97 | 0.98 | 0.76 | 0.61 | 0.60 | 0.58 | 0.43 | 0.31 |
| 16.53 | 1.26 | 1.11 | 0.99 | 0.81 | 0.75 | 0.67 | 0.60 | 0.47 | 0.46 | 0.40 | 0.30 |
| 16.81 | 1.18 | 1.06 | 0.91 | 0.87 | 0.73 | 0.50 | 0.46 | 0.55 | 0.38 | 0.36 | 0.35 |
| 17.12 | 1.35 | 1.20 | 1.03 | 0.88 | 0.94 | 0.75 | 0.61 | 0.49 | 0.50 | 0.42 | 0.41 |
| 17.45 | 1.12 | 1.02 | 0.89 | 0.72 | 0.65 | 0.59 | 0.60 | 0.41 | 0.37 | 0.32 | 0.22 |
| 17.81 | 1.32 | 1.15 | 0.98 | 0.86 | 0.82 | 0.70 | 0.66 | 0.54 | 0.45 | 0.41 | 0.41 |
| 18.19 | 1.36 | 1.21 | 1.02 | 0.90 | 0.86 | 0.77 | 0.65 | 0.53 | 0.55 | 0.49 | 0.38 |
| 18.60 | 1.27 | 1.31 | 1.05 | 1.00 | 0.86 | 0.66 | 0.66 | 0.54 | 0.54 | 0.45 | 0.49 |

|        |      |      |       |       |       |       |       |       |       |       |       |
|--------|------|------|-------|-------|-------|-------|-------|-------|-------|-------|-------|
| 19.05  | 1.19 | 1.21 | 1.08  | 1.00  | 0.85  | 0.71  | 0.58  | 0.56  | 0.41  | 0.40  | 0.40  |
| 19.53  | 1.14 | 1.23 | 0.94  | 0.83  | 0.75  | 0.66  | 0.53  | 0.41  | 0.40  | 0.32  | 0.28  |
| 20.05  | 1.12 | 1.02 | 0.82  | 0.71  | 0.68  | 0.50  | 0.46  | 0.41  | 0.31  | 0.21  | 0.27  |
| 20.61  | 1.24 | 1.10 | 1.09  | 0.94  | 0.83  | 0.64  | 0.47  | 0.59  | 0.47  | 0.44  | 0.25  |
| 21.22  | 1.20 | 1.18 | 0.98  | 0.90  | 0.86  | 0.80  | 0.54  | 0.47  | 0.48  | 0.35  | 0.37  |
| 21.87  | 1.12 | 1.01 | 0.88  | 0.79  | 0.72  | 0.58  | 0.48  | 0.45  | 0.43  | 0.24  | 0.06  |
| 22.57  | 1.16 | 1.05 | 1.00  | 0.83  | 0.72  | 0.64  | 0.74  | 0.55  | 0.51  | 0.36  | 0.34  |
| 23.33  | 1.26 | 1.08 | 1.06  | 0.89  | 0.88  | 0.69  | 0.60  | 0.44  | 0.51  | 0.32  | 0.23  |
| 24.15  | 1.25 | 1.16 | 0.85  | 0.81  | 0.67  | 0.64  | 0.50  | 0.42  | 0.32  | 0.30  | 0.29  |
| 25.03  | 1.11 | 1.08 | 0.92  | 0.72  | 0.75  | 0.56  | 0.51  | 0.45  | 0.53  | 0.32  | 0.26  |
| 25.98  | 1.01 | 1.01 | 0.77  | 0.75  | 0.78  | 0.54  | 0.50  | 0.45  | 0.36  | 0.29  | 0.17  |
| 27.01  | 1.08 | 0.99 | 0.80  | 0.66  | 0.63  | 0.45  | 0.40  | 0.36  | 0.36  | 0.24  | 0.12  |
| 28.11  | 1.10 | 0.97 | 0.92  | 0.69  | 0.69  | 0.65  | 0.52  | 0.41  | 0.34  | 0.44  | 0.26  |
| 29.30  | 1.16 | 1.04 | 0.89  | 0.81  | 0.74  | 0.57  | 0.50  | 0.50  | 0.42  | 0.24  | 0.33  |
| 30.59  | 0.98 | 0.98 | 0.78  | 0.77  | 0.71  | 0.42  | 0.46  | 0.38  | 0.20  | 0.23  | 0.16  |
| 31.98  | 0.93 | 0.82 | 0.64  | 0.56  | 0.60  | 0.44  | 0.37  | 0.27  | 0.11  | 0.10  | 0.08  |
| 33.47  | 1.05 | 0.89 | 0.90  | 0.61  | 0.61  | 0.49  | 0.48  | 0.39  | 0.37  | 0.35  | 0.16  |
| 35.09  | 1.00 | 0.96 | 0.80  | 0.78  | 0.66  | 0.48  | 0.38  | 0.33  | 0.27  | 0.15  | 0.17  |
| 36.83  | 1.05 | 0.95 | 0.87  | 0.65  | 0.61  | 0.48  | 0.29  | 0.31  | 0.21  | 0.13  | 0.05  |
| 38.71  | 1.02 | 0.97 | 0.78  | 0.63  | 0.63  | 0.46  | 0.36  | 0.15  | 0.32  | 0.14  | 0.18  |
| 40.73  | 1.18 | 0.94 | 0.89  | 0.68  | 0.70  | 0.57  | 0.40  | 0.32  | 0.31  | 0.27  | 0.12  |
| 42.92  | 1.11 | 0.91 | 0.80  | 0.70  | 0.62  | 0.50  | 0.50  | 0.36  | 0.27  | 0.27  | 0.16  |
| 45.27  | 1.00 | 1.09 | 0.82  | 0.62  | 0.55  | 0.42  | 0.45  | 0.45  | 0.37  | 0.24  | 0.14  |
| 47.81  | 1.05 | 0.95 | 0.68  | 0.64  | 0.58  | 0.47  | 0.43  | 0.22  | 0.29  | 0.12  | 0.09  |
| 50.55  | 0.67 | 0.73 | 0.49  | 0.38  | 0.40  | 0.24  | 0.15  | 0.20  | 0.14  | -0.01 | -0.13 |
| 53.51  | 0.99 | 0.93 | 0.72  | 0.63  | 0.52  | 0.57  | 0.36  | 0.31  | 0.24  | 0.25  | 0.10  |
| 56.69  | 0.99 | 0.85 | 0.58  | 0.52  | 0.53  | 0.33  | 0.24  | 0.16  | 0.13  | -0.06 | -0.09 |
| 60.13  | 0.72 | 0.65 | 0.45  | 0.46  | 0.38  | 0.30  | 0.14  | 0.12  | 0.05  | -0.03 | -0.10 |
| 63.84  | 0.80 | 0.65 | 0.54  | 0.44  | 0.42  | 0.22  | 0.14  | 0.03  | 0.11  | -0.02 | -0.10 |
| 67.83  | 0.72 | 0.65 | 0.55  | 0.30  | 0.35  | 0.17  | 0.04  | 0.05  | -0.04 | -0.11 | -0.22 |
| 72.15  | 0.71 | 0.72 | 0.53  | 0.28  | 0.30  | 0.13  | 0.24  | 0.12  | -0.02 | -0.11 | -0.10 |
| 76.80  | 0.60 | 0.53 | 0.42  | 0.30  | 0.17  | 0.04  | 0.04  | -0.04 | -0.10 | -0.17 | -0.24 |
| 81.81  | 0.71 | 0.72 | 0.59  | 0.43  | 0.36  | 0.28  | 0.15  | 0.10  | 0.04  | 0.01  | -0.27 |
| 87.22  | 0.81 | 0.64 | 0.38  | 0.29  | 0.30  | 0.31  | 0.05  | 0.05  | 0.00  | -0.02 | -0.20 |
| 93.06  | 0.60 | 0.57 | 0.34  | 0.23  | 0.13  | 0.03  | -0.08 | -0.08 | -0.18 | -0.18 | -0.25 |
| 99.35  | 0.69 | 0.68 | 0.34  | 0.28  | 0.27  | 0.09  | 0.05  | 0.02  | -0.16 | -0.15 | -0.28 |
| 106.13 | 0.61 | 0.62 | 0.30  | 0.12  | 0.07  | 0.01  | -0.09 | -0.11 | -0.06 | -0.28 | -0.32 |
| 113.45 | 0.81 | 0.62 | 0.47  | 0.46  | 0.37  | 0.14  | 0.09  | -0.09 | -0.11 | -0.08 | -0.16 |
| 121.34 | 0.62 | 0.53 | 0.43  | 0.23  | 0.11  | -0.01 | -0.12 | -0.12 | -0.21 | -0.36 | -0.40 |
| 129.86 | 0.48 | 0.36 | 0.08  | 0.03  | 0.02  | -0.21 | -0.28 | -0.25 | -0.43 | -0.49 | -0.50 |
| 139.04 | 0.55 | 0.56 | 0.36  | 0.12  | 0.07  | -0.03 | -0.08 | -0.25 | -0.23 | -0.29 | -0.46 |
| 148.94 | 0.43 | 0.20 | 0.09  | 0.07  | -0.02 | -0.09 | -0.24 | -0.23 | -0.30 | -0.40 | -0.49 |
| 159.62 | 0.53 | 0.39 | 0.24  | 0.10  | -0.07 | -0.12 | -0.17 | -0.24 | -0.29 | -0.48 | -0.46 |
| 171.14 | 0.62 | 0.36 | 0.19  | 0.02  | 0.09  | -0.25 | -0.27 | -0.27 | -0.35 | -0.36 | -0.45 |
| 183.56 | 0.44 | 0.19 | 0.07  | -0.03 | -0.09 | -0.18 | -0.29 | -0.32 | -0.36 | -0.51 | -0.57 |
| 196.96 | 0.38 | 0.17 | 0.11  | 0.03  | -0.10 | -0.18 | -0.34 | -0.32 | -0.40 | -0.53 | -0.59 |
| 211.41 | 0.34 | 0.20 | 0.06  | 0.03  | 0.02  | -0.19 | -0.21 | -0.40 | -0.37 | -0.52 | -0.52 |
| 226.99 | 0.33 | 0.20 | 0.07  | -0.04 | -0.03 | -0.16 | -0.23 | -0.36 | -0.45 | -0.54 | -0.64 |
| 243.80 | 0.33 | 0.10 | -0.04 | -0.03 | -0.20 | -0.32 | -0.40 | -0.43 | -0.50 | -0.55 | -0.56 |
| 261.93 | 0.31 | 0.21 | 0.05  | -0.05 | -0.22 | -0.19 | -0.33 | -0.36 | -0.40 | -0.47 | -0.64 |

|         |       |       |       |       |       |       |       |       |       |       |       |
|---------|-------|-------|-------|-------|-------|-------|-------|-------|-------|-------|-------|
| 281.48  | 0.27  | 0.05  | -0.04 | -0.21 | -0.18 | -0.32 | -0.37 | -0.59 | -0.50 | -0.70 | -0.72 |
| 302.56  | 0.15  | 0.02  | -0.04 | -0.19 | -0.09 | -0.36 | -0.47 | -0.46 | -0.44 | -0.54 | -0.76 |
| 325.30  | 0.18  | 0.12  | -0.12 | -0.15 | -0.23 | -0.30 | -0.32 | -0.39 | -0.47 | -0.58 | -0.60 |
| 349.83  | 0.16  | 0.16  | -0.06 | -0.17 | -0.08 | -0.26 | -0.40 | -0.50 | -0.44 | -0.52 | -0.67 |
| 376.28  | 0.21  | 0.10  | -0.08 | -0.23 | -0.22 | -0.42 | -0.52 | -0.51 | -0.51 | -0.64 | -0.76 |
| 404.81  | 0.13  | 0.17  | -0.11 | -0.20 | -0.23 | -0.30 | -0.41 | -0.49 | -0.43 | -0.63 | -0.53 |
| 435.58  | 0.16  | 0.12  | -0.01 | -0.17 | -0.29 | -0.39 | -0.42 | -0.47 | -0.47 | -0.53 | -0.58 |
| 468.76  | 0.04  | 0.14  | -0.14 | -0.27 | -0.20 | -0.36 | -0.41 | -0.45 | -0.45 | -0.53 | -0.66 |
| 504.55  | -0.01 | -0.08 | -0.10 | -0.22 | -0.26 | -0.40 | -0.48 | -0.48 | -0.66 | -0.70 | -0.67 |
| 543.15  | 0.14  | -0.05 | -0.11 | -0.05 | -0.19 | -0.30 | -0.33 | -0.45 | -0.37 | -0.54 | -0.63 |
| 584.78  | -0.03 | -0.12 | -0.10 | -0.27 | -0.32 | -0.47 | -0.45 | -0.61 | -0.78 | -0.57 | -0.61 |
| 629.68  | 0.18  | 0.02  | -0.13 | -0.16 | -0.21 | -0.22 | -0.37 | -0.37 | -0.55 | -0.58 | -0.49 |
| 678.10  | 0.14  | 0.01  | -0.19 | -0.14 | -0.30 | -0.39 | -0.35 | -0.46 | -0.48 | -0.58 | -0.65 |
| 730.33  | 0.32  | 0.22  | -0.02 | -0.07 | -0.17 | -0.25 | -0.20 | -0.35 | -0.38 | -0.45 | -0.49 |
| 786.65  | 0.20  | 0.07  | -0.14 | -0.19 | -0.07 | -0.18 | -0.26 | -0.36 | -0.42 | -0.49 | -0.35 |
| 847.40  | 0.06  | -0.03 | -0.22 | -0.19 | -0.24 | -0.31 | -0.40 | -0.43 | -0.53 | -0.57 | -0.65 |
| 912.92  | 0.06  | 0.03  | -0.10 | -0.17 | -0.18 | -0.40 | -0.40 | -0.45 | -0.48 | -0.49 | -0.62 |
| 983.58  | 0.22  | 0.15  | 0.04  | -0.06 | -0.11 | -0.22 | -0.29 | -0.38 | -0.43 | -0.34 | -0.40 |
| 1059.78 | 0.13  | 0.21  | -0.04 | -0.04 | -0.11 | -0.10 | -0.17 | -0.33 | -0.28 | -0.34 | -0.42 |
| 1141.98 | 0.19  | 0.07  | -0.04 | -0.16 | -0.15 | -0.36 | -0.30 | -0.29 | -0.41 | -0.43 | -0.47 |
| 1230.62 | 0.10  | 0.09  | -0.08 | -0.20 | -0.14 | -0.16 | -0.20 | -0.31 | -0.33 | -0.36 | -0.47 |
| 1326.23 | 0.24  | 0.18  | 0.05  | -0.04 | -0.02 | -0.17 | -0.22 | -0.18 | -0.17 | -0.21 | -0.38 |
| 1429.34 | 0.19  | 0.20  | 0.02  | -0.03 | 0.03  | -0.11 | -0.20 | -0.24 | -0.24 | -0.29 | -0.35 |
| 1540.54 | 0.17  | 0.15  | 0.06  | 0.07  | -0.03 | -0.03 | -0.15 | -0.16 | -0.19 | -0.22 | -0.26 |
| 1660.48 | 0.18  | 0.08  | -0.02 | -0.03 | -0.12 | -0.12 | -0.24 | -0.30 | -0.16 | -0.24 | -0.23 |
| 1789.83 | 0.22  | 0.18  | 0.07  | -0.04 | -0.06 | -0.02 | -0.15 | -0.20 | -0.18 | -0.13 | -0.20 |
| 1929.34 | 0.33  | 0.22  | 0.06  | 0.06  | 0.05  | -0.04 | -0.01 | -0.08 | -0.15 | -0.15 | -0.06 |
| 2079.80 | 0.31  | 0.14  | 0.12  | 0.00  | 0.09  | 0.01  | 0.00  | -0.01 | -0.07 | -0.07 | -0.20 |
| 2242.08 | 0.29  | 0.32  | 0.07  | 0.04  | -0.01 | 0.07  | -0.04 | -0.09 | -0.06 | -0.12 | -0.16 |
| 2417.10 | 0.32  | 0.20  | 0.07  | 0.24  | 0.11  | -0.08 | -0.01 | 0.11  | -0.04 | 0.00  | -0.14 |
| 2605.85 | 0.32  | 0.26  | 0.26  | 0.20  | 0.24  | 0.16  | 0.12  | 0.04  | 0.12  | 0.05  | -0.02 |
| 2809.43 | 0.28  | 0.24  | 0.14  | 0.17  | 0.12  | 0.12  | 0.01  | -0.02 | -0.04 | 0.00  | -0.01 |
| 3028.99 | 0.26  | 0.23  | 0.16  | 0.17  | 0.12  | 0.02  | 0.13  | 0.06  | 0.09  | -0.02 | 0.02  |
| 3265.79 | 0.29  | 0.33  | 0.19  | 0.17  | 0.19  | 0.06  | 0.12  | 0.10  | 0.05  | 0.09  | 0.12  |
| 3521.18 | 0.31  | 0.27  | 0.28  | 0.17  | 0.23  | 0.21  | 0.27  | 0.21  | 0.09  | 0.19  | -0.03 |
| 3796.62 | 0.30  | 0.24  | 0.12  | 0.10  | 0.21  | -0.07 | 0.06  | 0.02  | 0.09  | 0.05  | 0.05  |

| Wavelength (nm) \ Time (ps) | 491.14 | 492.55 | 493.96 | 495.36 | 496.77 | 498.18 | 499.59 | 501.00 | 502.41 | 503.82 | 505.22 |
|-----------------------------|--------|--------|--------|--------|--------|--------|--------|--------|--------|--------|--------|
| -3.28                       | -0.14  | -0.11  | -0.12  | -0.15  | -0.12  | -0.09  | -0.18  | -0.17  | -0.11  | -0.04  | -0.14  |
| -2.78                       | -0.16  | -0.02  | -0.12  | -0.03  | -0.12  | -0.15  | -0.12  | -0.07  | -0.08  | -0.10  | -0.05  |
| -2.28                       | -0.02  | 0.02   | 0.04   | -0.08  | 0.00   | -0.02  | 0.04   | -0.03  | 0.00   | -0.05  | -0.08  |
| -1.78                       | 0.31   | 0.19   | 0.19   | 0.12   | 0.26   | 0.19   | 0.19   | 0.19   | 0.17   | 0.24   | 0.16   |
| -1.28                       | -0.02  | -0.11  | -0.06  | 0.00   | -0.05  | -0.02  | 0.03   | 0.01   | -0.07  | 0.03   | -0.06  |
| -0.78                       | -0.09  | -0.12  | -0.15  | -0.16  | -0.08  | -0.15  | -0.09  | -0.15  | -0.06  | -0.08  | -0.03  |
| -0.28                       | -0.01  | -0.02  | 0.03   | 0.07   | 0.00   | -0.01  | -0.01  | 0.00   | 0.04   | -0.07  | 0.11   |
| 0.22                        | 0.11   | 0.12   | 0.12   | 0.06   | 0.09   | 0.16   | 0.06   | 0.11   | 0.04   | 0.09   | 0.12   |
| 0.32                        | -0.07  | -0.08  | -0.07  | -0.02  | -0.07  | -0.04  | -0.09  | 0.04   | -0.05  | -0.14  | -0.10  |
| 0.42                        | 0.10   | 0.13   | 0.13   | 0.18   | 0.10   | 0.13   | 0.17   | 0.07   | 0.11   | 0.12   | 0.07   |

|      |       |       |       |       |       |       |       |       |       |       |       |
|------|-------|-------|-------|-------|-------|-------|-------|-------|-------|-------|-------|
| 0.52 | -0.09 | -0.02 | 0.01  | 0.01  | -0.02 | -0.01 | -0.05 | 0.04  | -0.03 | 0.01  | -0.09 |
| 0.62 | 0.07  | 0.16  | 0.05  | 0.09  | 0.10  | 0.01  | 0.13  | 0.06  | 0.08  | 0.10  | 0.03  |
| 0.72 | 0.30  | 0.27  | 0.19  | 0.25  | 0.23  | 0.27  | 0.21  | 0.28  | 0.20  | 0.24  | 0.27  |
| 0.77 | 0.17  | 0.21  | 0.06  | 0.08  | 0.20  | 0.11  | 0.08  | 0.01  | 0.10  | 0.11  | 0.08  |
| 0.82 | 0.08  | 0.13  | 0.04  | 0.15  | 0.07  | 0.06  | 0.10  | 0.05  | 0.10  | 0.14  | 0.13  |
| 0.87 | -0.03 | 0.04  | -0.13 | -0.01 | -0.09 | -0.06 | 0.08  | 0.02  | -0.04 | -0.03 | 0.00  |
| 0.92 | -0.05 | 0.03  | 0.12  | 0.13  | 0.10  | 0.09  | -0.03 | 0.06  | 0.10  | 0.08  | 0.04  |
| 0.97 | 0.00  | -0.08 | -0.06 | 0.04  | 0.04  | -0.02 | -0.03 | 0.01  | 0.02  | -0.08 | -0.10 |
| 1.02 | -0.06 | -0.07 | -0.11 | -0.06 | -0.06 | -0.13 | -0.15 | -0.07 | -0.10 | -0.08 | -0.14 |
| 1.07 | -0.01 | 0.10  | 0.10  | 0.14  | 0.16  | 0.08  | 0.12  | 0.10  | 0.17  | 0.14  | 0.11  |
| 1.12 | -0.17 | -0.14 | -0.24 | -0.20 | -0.22 | -0.23 | -0.16 | -0.28 | -0.14 | -0.10 | -0.21 |
| 1.17 | -0.17 | -0.10 | -0.15 | -0.11 | -0.05 | -0.06 | -0.04 | -0.04 | -0.22 | -0.11 | -0.19 |
| 1.22 | -0.03 | -0.01 | 0.00  | 0.02  | 0.01  | -0.01 | 0.06  | -0.04 | -0.04 | 0.09  | -0.03 |
| 1.27 | 0.03  | 0.05  | 0.01  | 0.10  | 0.05  | 0.05  | 0.09  | 0.04  | 0.02  | 0.06  | 0.03  |
| 1.32 | -0.30 | -0.34 | -0.29 | -0.23 | -0.23 | -0.20 | -0.20 | -0.13 | -0.09 | 0.00  | -0.12 |
| 1.37 | 0.31  | 0.15  | 0.07  | 0.01  | -0.09 | -0.27 | -0.18 | -0.27 | -0.34 | -0.28 | -0.29 |
| 1.42 | 2.23  | 2.14  | 1.84  | 1.66  | 1.61  | 1.44  | 1.33  | 1.32  | 1.15  | 1.11  | 0.88  |
| 1.47 | 0.22  | 0.28  | 0.14  | 0.30  | 0.37  | 0.43  | 0.63  | 0.70  | 0.92  | 1.20  | 1.30  |
| 1.52 | -1.19 | -1.27 | -1.42 | -1.42 | -1.44 | -1.38 | -1.33 | -1.23 | -1.04 | -0.77 | -0.52 |
| 1.57 | -1.74 | -1.90 | -2.07 | -2.19 | -2.33 | -2.27 | -2.29 | -2.29 | -2.12 | -1.88 | -1.70 |
| 1.62 | -1.72 | -2.00 | -2.11 | -2.33 | -2.43 | -2.54 | -2.47 | -2.46 | -2.35 | -2.20 | -2.04 |
| 1.67 | -1.88 | -2.18 | -2.38 | -2.50 | -2.65 | -2.64 | -2.59 | -2.57 | -2.42 | -2.25 | -2.16 |
| 1.72 | -1.87 | -2.04 | -2.27 | -2.36 | -2.47 | -2.50 | -2.48 | -2.38 | -2.34 | -2.11 | -2.01 |
| 1.77 | -1.82 | -2.03 | -2.16 | -2.23 | -2.37 | -2.42 | -2.26 | -2.25 | -2.20 | -2.00 | -1.79 |
| 1.82 | -1.61 | -1.76 | -1.98 | -2.10 | -2.20 | -2.22 | -2.15 | -2.04 | -1.96 | -1.78 | -1.61 |
| 1.87 | -1.45 | -1.63 | -1.73 | -1.85 | -1.86 | -1.95 | -1.90 | -1.84 | -1.68 | -1.55 | -1.36 |
| 1.92 | -1.51 | -1.69 | -1.90 | -1.95 | -2.00 | -2.05 | -1.96 | -1.92 | -1.79 | -1.56 | -1.38 |
| 1.97 | -1.57 | -1.79 | -1.93 | -1.97 | -2.14 | -2.14 | -1.98 | -2.03 | -1.85 | -1.56 | -1.40 |
| 2.02 | -1.45 | -1.61 | -1.80 | -1.88 | -1.92 | -1.89 | -1.76 | -1.87 | -1.58 | -1.41 | -1.24 |
| 2.07 | -1.59 | -1.77 | -1.84 | -1.80 | -1.93 | -2.01 | -1.92 | -1.84 | -1.72 | -1.48 | -1.24 |
| 2.12 | -1.51 | -1.55 | -1.64 | -1.84 | -1.83 | -1.87 | -1.79 | -1.70 | -1.55 | -1.21 | -1.04 |
| 2.17 | -1.25 | -1.46 | -1.47 | -1.53 | -1.57 | -1.61 | -1.49 | -1.43 | -1.34 | -1.01 | -0.85 |
| 2.22 | -1.33 | -1.46 | -1.76 | -1.64 | -1.73 | -1.77 | -1.61 | -1.50 | -1.35 | -1.05 | -0.92 |
| 2.27 | -1.18 | -1.38 | -1.55 | -1.52 | -1.58 | -1.58 | -1.57 | -1.43 | -1.18 | -0.98 | -0.76 |
| 2.32 | -1.27 | -1.26 | -1.52 | -1.59 | -1.65 | -1.63 | -1.49 | -1.39 | -1.17 | -1.00 | -0.76 |
| 2.37 | -1.45 | -1.52 | -1.71 | -1.75 | -1.85 | -1.71 | -1.65 | -1.50 | -1.35 | -1.19 | -0.87 |
| 2.42 | -1.34 | -1.31 | -1.61 | -1.58 | -1.65 | -1.61 | -1.52 | -1.41 | -1.15 | -0.96 | -0.68 |
| 2.47 | -1.26 | -1.47 | -1.48 | -1.60 | -1.69 | -1.57 | -1.53 | -1.40 | -1.26 | -0.94 | -0.73 |
| 2.52 | -1.32 | -1.45 | -1.40 | -1.60 | -1.69 | -1.55 | -1.52 | -1.33 | -1.26 | -0.94 | -0.69 |
| 2.57 | -1.36 | -1.48 | -1.58 | -1.65 | -1.74 | -1.68 | -1.62 | -1.30 | -1.27 | -0.99 | -0.77 |
| 2.62 | -1.00 | -1.15 | -1.36 | -1.32 | -1.32 | -1.34 | -1.25 | -1.11 | -0.87 | -0.58 | -0.35 |
| 2.67 | -1.33 | -1.39 | -1.53 | -1.44 | -1.52 | -1.63 | -1.46 | -1.41 | -1.14 | -0.95 | -0.64 |
| 2.72 | -1.14 | -1.16 | -1.44 | -1.51 | -1.42 | -1.42 | -1.29 | -1.17 | -1.01 | -0.73 | -0.48 |
| 2.77 | -1.04 | -1.18 | -1.31 | -1.36 | -1.31 | -1.25 | -1.19 | -1.08 | -0.84 | -0.58 | -0.30 |
| 2.82 | -1.21 | -1.30 | -1.36 | -1.43 | -1.50 | -1.36 | -1.26 | -1.24 | -0.85 | -0.62 | -0.46 |
| 2.87 | -1.33 | -1.37 | -1.47 | -1.62 | -1.63 | -1.50 | -1.36 | -1.25 | -1.06 | -0.79 | -0.51 |
| 2.92 | -1.25 | -1.26 | -1.43 | -1.46 | -1.48 | -1.39 | -1.26 | -1.21 | -1.10 | -0.74 | -0.43 |
| 2.97 | -1.12 | -1.31 | -1.47 | -1.45 | -1.50 | -1.49 | -1.31 | -1.20 | -1.06 | -0.81 | -0.47 |
| 3.02 | -1.21 | -1.26 | -1.38 | -1.45 | -1.50 | -1.44 | -1.38 | -1.27 | -1.06 | -0.72 | -0.48 |
| 3.07 | -1.20 | -1.37 | -1.50 | -1.54 | -1.59 | -1.46 | -1.36 | -1.29 | -1.00 | -0.79 | -0.53 |

|       |       |       |       |       |       |       |       |       |       |       |       |
|-------|-------|-------|-------|-------|-------|-------|-------|-------|-------|-------|-------|
| 3.12  | -1.26 | -1.34 | -1.49 | -1.55 | -1.57 | -1.44 | -1.35 | -1.22 | -0.98 | -0.62 | -0.37 |
| 3.17  | -1.13 | -1.31 | -1.50 | -1.45 | -1.48 | -1.37 | -1.28 | -1.21 | -0.95 | -0.57 | -0.34 |
| 3.22  | -1.20 | -1.28 | -1.44 | -1.40 | -1.45 | -1.38 | -1.24 | -1.16 | -0.92 | -0.60 | -0.43 |
| 3.27  | -1.16 | -1.31 | -1.31 | -1.38 | -1.43 | -1.40 | -1.35 | -1.14 | -0.92 | -0.59 | -0.35 |
| 3.32  | -1.21 | -1.31 | -1.43 | -1.54 | -1.53 | -1.40 | -1.32 | -1.15 | -0.93 | -0.63 | -0.38 |
| 3.37  | -1.37 | -1.49 | -1.63 | -1.60 | -1.65 | -1.58 | -1.45 | -1.30 | -1.14 | -0.76 | -0.48 |
| 3.42  | -1.16 | -1.29 | -1.42 | -1.47 | -1.48 | -1.35 | -1.24 | -1.17 | -0.91 | -0.59 | -0.28 |
| 3.47  | -1.31 | -1.41 | -1.62 | -1.58 | -1.55 | -1.52 | -1.40 | -1.26 | -1.03 | -0.78 | -0.55 |
| 3.52  | -1.33 | -1.43 | -1.54 | -1.64 | -1.57 | -1.53 | -1.39 | -1.33 | -1.09 | -0.75 | -0.46 |
| 3.57  | -1.18 | -1.36 | -1.50 | -1.43 | -1.41 | -1.37 | -1.33 | -1.21 | -1.00 | -0.67 | -0.38 |
| 3.62  | -1.20 | -1.23 | -1.36 | -1.42 | -1.34 | -1.37 | -1.21 | -1.00 | -0.84 | -0.50 | -0.19 |
| 3.67  | -1.28 | -1.40 | -1.45 | -1.52 | -1.49 | -1.48 | -1.29 | -1.26 | -1.03 | -0.69 | -0.49 |
| 3.72  | -1.10 | -1.26 | -1.35 | -1.40 | -1.41 | -1.32 | -1.22 | -1.00 | -0.85 | -0.60 | -0.24 |
| 3.92  | -1.20 | -1.35 | -1.42 | -1.53 | -1.41 | -1.37 | -1.21 | -1.12 | -0.86 | -0.46 | -0.34 |
| 4.12  | -1.23 | -1.38 | -1.38 | -1.52 | -1.57 | -1.45 | -1.29 | -1.19 | -0.95 | -0.61 | -0.31 |
| 4.32  | -1.21 | -1.33 | -1.39 | -1.37 | -1.51 | -1.37 | -1.20 | -1.00 | -0.82 | -0.58 | -0.26 |
| 4.52  | -1.22 | -1.38 | -1.44 | -1.53 | -1.46 | -1.45 | -1.23 | -1.00 | -0.84 | -0.52 | -0.26 |
| 4.72  | -1.25 | -1.45 | -1.56 | -1.55 | -1.47 | -1.39 | -1.24 | -1.16 | -0.91 | -0.64 | -0.30 |
| 4.92  | -1.14 | -1.19 | -1.44 | -1.48 | -1.37 | -1.30 | -1.17 | -0.98 | -0.75 | -0.38 | -0.12 |
| 5.12  | -1.16 | -1.26 | -1.34 | -1.35 | -1.44 | -1.24 | -1.17 | -0.97 | -0.83 | -0.48 | -0.14 |
| 5.32  | -1.15 | -1.25 | -1.34 | -1.25 | -1.32 | -1.32 | -1.08 | -1.08 | -0.74 | -0.40 | -0.11 |
| 5.52  | -1.07 | -1.12 | -1.29 | -1.28 | -1.31 | -1.25 | -1.06 | -0.88 | -0.62 | -0.29 | -0.13 |
| 5.72  | -1.04 | -1.29 | -1.35 | -1.28 | -1.36 | -1.22 | -1.14 | -0.98 | -0.79 | -0.41 | -0.01 |
| 5.92  | -1.24 | -1.48 | -1.55 | -1.60 | -1.57 | -1.43 | -1.34 | -1.15 | -0.88 | -0.61 | -0.24 |
| 6.12  | -1.24 | -1.41 | -1.44 | -1.38 | -1.38 | -1.36 | -1.19 | -1.01 | -0.83 | -0.44 | -0.24 |
| 6.32  | -1.26 | -1.43 | -1.54 | -1.44 | -1.59 | -1.44 | -1.27 | -1.15 | -0.89 | -0.60 | -0.32 |
| 6.52  | -1.06 | -1.26 | -1.35 | -1.44 | -1.34 | -1.46 | -1.17 | -0.97 | -0.67 | -0.26 | 0.01  |
| 6.72  | -1.08 | -1.13 | -1.30 | -1.35 | -1.29 | -1.17 | -1.05 | -0.89 | -0.68 | -0.40 | -0.02 |
| 6.92  | -1.28 | -1.42 | -1.48 | -1.48 | -1.47 | -1.42 | -1.29 | -0.99 | -0.85 | -0.45 | -0.25 |
| 7.12  | -1.13 | -1.35 | -1.50 | -1.49 | -1.50 | -1.38 | -1.17 | -1.04 | -0.80 | -0.34 | -0.12 |
| 7.32  | -1.25 | -1.34 | -1.48 | -1.55 | -1.59 | -1.36 | -1.32 | -1.08 | -0.82 | -0.47 | -0.19 |
| 7.52  | -1.26 | -1.34 | -1.48 | -1.46 | -1.40 | -1.38 | -1.30 | -1.06 | -0.68 | -0.44 | -0.13 |
| 7.72  | -1.24 | -1.37 | -1.50 | -1.51 | -1.50 | -1.45 | -1.16 | -1.04 | -0.82 | -0.43 | -0.13 |
| 7.92  | -1.24 | -1.27 | -1.54 | -1.54 | -1.43 | -1.39 | -1.20 | -1.10 | -0.79 | -0.47 | -0.15 |
| 8.12  | -1.28 | -1.30 | -1.44 | -1.45 | -1.43 | -1.29 | -1.16 | -0.97 | -0.76 | -0.35 | -0.05 |
| 8.32  | -1.24 | -1.28 | -1.47 | -1.39 | -1.41 | -1.29 | -1.12 | -0.96 | -0.68 | -0.36 | -0.07 |
| 8.52  | -1.34 | -1.30 | -1.40 | -1.50 | -1.53 | -1.42 | -1.23 | -1.12 | -0.80 | -0.46 | -0.18 |
| 8.72  | -1.42 | -1.53 | -1.60 | -1.71 | -1.58 | -1.58 | -1.39 | -1.26 | -0.91 | -0.64 | -0.26 |
| 8.92  | -1.38 | -1.53 | -1.59 | -1.65 | -1.71 | -1.46 | -1.36 | -1.19 | -0.91 | -0.60 | -0.36 |
| 9.12  | -1.32 | -1.46 | -1.51 | -1.55 | -1.51 | -1.47 | -1.21 | -1.10 | -0.84 | -0.46 | -0.16 |
| 9.32  | -1.30 | -1.43 | -1.39 | -1.51 | -1.52 | -1.39 | -1.28 | -1.09 | -0.87 | -0.47 | -0.21 |
| 9.52  | -1.39 | -1.53 | -1.58 | -1.60 | -1.61 | -1.47 | -1.31 | -1.21 | -0.97 | -0.53 | -0.28 |
| 9.72  | -1.23 | -1.41 | -1.46 | -1.53 | -1.42 | -1.42 | -1.28 | -1.12 | -0.81 | -0.39 | -0.14 |
| 9.92  | -1.15 | -1.25 | -1.25 | -1.33 | -1.36 | -1.27 | -1.09 | -0.89 | -0.68 | -0.32 | 0.03  |
| 10.12 | -1.37 | -1.49 | -1.61 | -1.54 | -1.67 | -1.55 | -1.37 | -1.11 | -0.83 | -0.51 | -0.29 |
| 10.32 | -1.27 | -1.42 | -1.46 | -1.51 | -1.51 | -1.41 | -1.26 | -1.09 | -0.90 | -0.57 | -0.17 |
| 10.52 | -1.31 | -1.60 | -1.68 | -1.63 | -1.62 | -1.51 | -1.37 | -1.19 | -0.92 | -0.57 | -0.22 |
| 10.72 | -1.25 | -1.47 | -1.49 | -1.48 | -1.51 | -1.42 | -1.20 | -1.14 | -0.82 | -0.56 | -0.09 |
| 10.92 | -1.25 | -1.37 | -1.48 | -1.48 | -1.44 | -1.34 | -1.24 | -1.07 | -0.75 | -0.47 | -0.07 |
| 11.12 | -1.38 | -1.44 | -1.64 | -1.56 | -1.56 | -1.53 | -1.40 | -1.11 | -0.74 | -0.52 | -0.21 |

|       |       |       |       |       |       |       |       |       |       |       |       |
|-------|-------|-------|-------|-------|-------|-------|-------|-------|-------|-------|-------|
| 11.32 | -1.14 | -1.23 | -1.36 | -1.43 | -1.32 | -1.30 | -1.08 | -0.93 | -0.67 | -0.27 | -0.08 |
| 11.52 | -1.31 | -1.42 | -1.50 | -1.58 | -1.52 | -1.37 | -1.36 | -1.16 | -0.84 | -0.59 | -0.17 |
| 11.72 | -1.26 | -1.34 | -1.47 | -1.46 | -1.45 | -1.40 | -1.22 | -1.10 | -0.82 | -0.43 | -0.15 |
| 11.92 | -1.37 | -1.55 | -1.59 | -1.69 | -1.64 | -1.60 | -1.47 | -1.17 | -0.87 | -0.55 | -0.27 |
| 12.12 | -1.51 | -1.61 | -1.65 | -1.58 | -1.68 | -1.58 | -1.52 | -1.22 | -0.89 | -0.52 | -0.21 |
| 12.32 | -1.32 | -1.39 | -1.54 | -1.51 | -1.58 | -1.56 | -1.38 | -1.11 | -0.81 | -0.48 | -0.18 |
| 12.52 | -1.38 | -1.45 | -1.58 | -1.62 | -1.49 | -1.50 | -1.38 | -1.23 | -0.87 | -0.58 | -0.16 |
| 12.72 | -1.18 | -1.18 | -1.29 | -1.32 | -1.24 | -1.24 | -1.03 | -0.94 | -0.59 | -0.28 | -0.03 |
| 12.92 | -1.34 | -1.40 | -1.53 | -1.42 | -1.45 | -1.40 | -1.20 | -0.98 | -0.83 | -0.41 | -0.14 |
| 13.12 | -1.34 | -1.40 | -1.58 | -1.61 | -1.54 | -1.43 | -1.33 | -1.15 | -0.87 | -0.54 | -0.12 |
| 13.32 | -1.48 | -1.61 | -1.72 | -1.74 | -1.69 | -1.59 | -1.50 | -1.34 | -0.92 | -0.53 | -0.24 |
| 13.52 | -1.24 | -1.37 | -1.41 | -1.49 | -1.41 | -1.30 | -1.18 | -1.04 | -0.80 | -0.49 | -0.13 |
| 13.72 | -1.24 | -1.24 | -1.49 | -1.45 | -1.41 | -1.38 | -1.20 | -0.92 | -0.69 | -0.37 | 0.03  |
| 13.92 | -1.36 | -1.51 | -1.61 | -1.72 | -1.64 | -1.52 | -1.41 | -1.19 | -0.91 | -0.52 | -0.18 |
| 14.00 | -1.36 | -1.43 | -1.62 | -1.51 | -1.60 | -1.51 | -1.30 | -1.08 | -0.69 | -0.40 | -0.09 |
| 14.08 | -1.38 | -1.49 | -1.52 | -1.58 | -1.61 | -1.45 | -1.24 | -1.04 | -0.84 | -0.43 | -0.12 |
| 14.17 | -1.37 | -1.53 | -1.55 | -1.57 | -1.64 | -1.47 | -1.29 | -1.13 | -0.98 | -0.61 | -0.17 |
| 14.27 | -1.47 | -1.56 | -1.72 | -1.72 | -1.71 | -1.58 | -1.46 | -1.20 | -0.93 | -0.61 | -0.27 |
| 14.38 | -1.25 | -1.42 | -1.54 | -1.58 | -1.54 | -1.51 | -1.33 | -1.08 | -0.78 | -0.43 | -0.14 |
| 14.49 | -1.37 | -1.50 | -1.58 | -1.51 | -1.59 | -1.47 | -1.35 | -1.20 | -0.91 | -0.53 | -0.11 |
| 14.61 | -1.52 | -1.57 | -1.71 | -1.66 | -1.67 | -1.57 | -1.36 | -1.15 | -1.03 | -0.61 | -0.38 |
| 14.75 | -1.44 | -1.57 | -1.73 | -1.65 | -1.64 | -1.69 | -1.42 | -1.21 | -0.87 | -0.60 | -0.29 |
| 14.89 | -1.18 | -1.31 | -1.40 | -1.42 | -1.40 | -1.33 | -1.19 | -0.96 | -0.66 | -0.27 | 0.13  |
| 15.05 | -1.33 | -1.53 | -1.54 | -1.58 | -1.54 | -1.52 | -1.39 | -1.12 | -0.80 | -0.54 | -0.23 |
| 15.21 | -1.31 | -1.39 | -1.46 | -1.61 | -1.42 | -1.32 | -1.29 | -1.00 | -0.79 | -0.51 | -0.08 |
| 15.39 | -1.22 | -1.29 | -1.37 | -1.42 | -1.47 | -1.28 | -1.11 | -1.11 | -0.72 | -0.32 | -0.04 |
| 15.59 | -1.43 | -1.60 | -1.67 | -1.72 | -1.72 | -1.60 | -1.31 | -1.20 | -0.94 | -0.59 | -0.19 |
| 15.80 | -1.26 | -1.52 | -1.53 | -1.55 | -1.54 | -1.56 | -1.34 | -1.11 | -0.89 | -0.41 | -0.18 |
| 16.02 | -1.31 | -1.43 | -1.47 | -1.49 | -1.41 | -1.50 | -1.21 | -1.03 | -0.84 | -0.45 | -0.10 |
| 16.27 | -1.39 | -1.47 | -1.58 | -1.54 | -1.57 | -1.45 | -1.26 | -1.13 | -0.83 | -0.43 | -0.08 |
| 16.53 | -1.45 | -1.57 | -1.75 | -1.65 | -1.63 | -1.60 | -1.43 | -1.19 | -0.89 | -0.62 | -0.26 |
| 16.81 | -1.46 | -1.63 | -1.74 | -1.68 | -1.67 | -1.59 | -1.44 | -1.20 | -0.97 | -0.72 | -0.31 |
| 17.12 | -1.36 | -1.55 | -1.61 | -1.65 | -1.65 | -1.50 | -1.33 | -1.22 | -0.81 | -0.49 | -0.17 |
| 17.45 | -1.40 | -1.50 | -1.60 | -1.62 | -1.67 | -1.46 | -1.39 | -1.19 | -0.88 | -0.56 | -0.26 |
| 17.81 | -1.39 | -1.59 | -1.76 | -1.77 | -1.57 | -1.63 | -1.40 | -1.22 | -0.91 | -0.52 | -0.16 |
| 18.19 | -1.47 | -1.55 | -1.70 | -1.77 | -1.62 | -1.63 | -1.44 | -1.19 | -0.91 | -0.47 | -0.18 |
| 18.60 | -1.50 | -1.57 | -1.60 | -1.60 | -1.62 | -1.54 | -1.34 | -1.15 | -0.84 | -0.38 | -0.07 |
| 19.05 | -1.48 | -1.55 | -1.68 | -1.69 | -1.62 | -1.54 | -1.46 | -1.31 | -0.92 | -0.49 | -0.21 |
| 19.53 | -1.60 | -1.64 | -1.74 | -1.64 | -1.74 | -1.66 | -1.47 | -1.33 | -0.98 | -0.63 | -0.32 |
| 20.05 | -1.56 | -1.73 | -1.75 | -1.80 | -1.74 | -1.75 | -1.47 | -1.33 | -1.05 | -0.60 | -0.28 |
| 20.61 | -1.46 | -1.55 | -1.67 | -1.75 | -1.66 | -1.56 | -1.41 | -1.18 | -0.84 | -0.50 | -0.16 |
| 21.22 | -1.33 | -1.53 | -1.57 | -1.62 | -1.57 | -1.49 | -1.38 | -1.13 | -0.96 | -0.50 | -0.17 |
| 21.87 | -1.56 | -1.74 | -1.76 | -1.80 | -1.84 | -1.74 | -1.53 | -1.34 | -0.91 | -0.65 | -0.30 |
| 22.57 | -1.44 | -1.57 | -1.61 | -1.66 | -1.57 | -1.43 | -1.30 | -1.29 | -0.90 | -0.49 | -0.18 |
| 23.33 | -1.56 | -1.64 | -1.67 | -1.72 | -1.63 | -1.71 | -1.42 | -1.25 | -1.04 | -0.59 | -0.26 |
| 24.15 | -1.52 | -1.64 | -1.69 | -1.76 | -1.72 | -1.52 | -1.46 | -1.20 | -0.94 | -0.60 | -0.28 |
| 25.03 | -1.55 | -1.66 | -1.80 | -1.73 | -1.75 | -1.63 | -1.50 | -1.25 | -0.94 | -0.57 | -0.33 |
| 25.98 | -1.58 | -1.66 | -1.81 | -1.88 | -1.74 | -1.71 | -1.53 | -1.25 | -1.03 | -0.57 | -0.30 |
| 27.01 | -1.64 | -1.76 | -1.84 | -1.88 | -1.76 | -1.73 | -1.50 | -1.39 | -1.02 | -0.70 | -0.31 |
| 28.11 | -1.55 | -1.70 | -1.78 | -1.68 | -1.78 | -1.59 | -1.35 | -1.19 | -0.93 | -0.55 | -0.23 |

|        |       |       |       |       |       |       |       |       |       |       |       |
|--------|-------|-------|-------|-------|-------|-------|-------|-------|-------|-------|-------|
| 29.30  | -1.64 | -1.75 | -1.76 | -1.79 | -1.73 | -1.65 | -1.49 | -1.34 | -1.11 | -0.66 | -0.31 |
| 30.59  | -1.56 | -1.69 | -1.75 | -1.77 | -1.81 | -1.76 | -1.56 | -1.34 | -1.02 | -0.62 | -0.36 |
| 31.98  | -1.72 | -1.92 | -2.03 | -1.98 | -1.97 | -1.83 | -1.65 | -1.43 | -1.17 | -0.89 | -0.46 |
| 33.47  | -1.64 | -1.79 | -1.88 | -1.87 | -1.82 | -1.75 | -1.58 | -1.36 | -1.14 | -0.65 | -0.30 |
| 35.09  | -1.66 | -1.79 | -1.89 | -1.80 | -1.90 | -1.65 | -1.68 | -1.34 | -1.05 | -0.73 | -0.35 |
| 36.83  | -1.74 | -1.82 | -1.91 | -2.01 | -1.94 | -1.83 | -1.63 | -1.48 | -1.21 | -0.76 | -0.46 |
| 38.71  | -1.60 | -1.76 | -1.86 | -1.80 | -1.70 | -1.75 | -1.55 | -1.35 | -1.04 | -0.64 | -0.32 |
| 40.73  | -1.58 | -1.72 | -1.76 | -1.70 | -1.76 | -1.68 | -1.53 | -1.30 | -0.97 | -0.62 | -0.19 |
| 42.92  | -1.67 | -1.76 | -1.94 | -1.78 | -1.84 | -1.71 | -1.59 | -1.33 | -1.06 | -0.70 | -0.36 |
| 45.27  | -1.68 | -1.74 | -1.82 | -1.92 | -1.88 | -1.76 | -1.56 | -1.44 | -1.12 | -0.74 | -0.40 |
| 47.81  | -1.72 | -1.84 | -2.01 | -1.88 | -1.99 | -1.91 | -1.65 | -1.49 | -1.14 | -0.80 | -0.37 |
| 50.55  | -1.80 | -1.81 | -2.03 | -2.06 | -2.01 | -1.93 | -1.74 | -1.55 | -1.26 | -0.92 | -0.54 |
| 53.51  | -1.76 | -1.90 | -2.00 | -1.92 | -1.89 | -1.85 | -1.65 | -1.47 | -1.20 | -0.80 | -0.39 |
| 56.69  | -1.85 | -2.00 | -2.14 | -2.09 | -2.15 | -2.00 | -1.83 | -1.63 | -1.32 | -0.90 | -0.64 |
| 60.13  | -1.92 | -2.05 | -2.13 | -2.19 | -2.09 | -2.10 | -1.87 | -1.68 | -1.33 | -1.03 | -0.64 |
| 63.84  | -1.94 | -1.99 | -2.07 | -2.05 | -2.03 | -1.96 | -1.78 | -1.59 | -1.35 | -0.89 | -0.54 |
| 67.83  | -2.07 | -2.19 | -2.33 | -2.32 | -2.25 | -2.11 | -2.07 | -1.79 | -1.42 | -1.03 | -0.70 |
| 72.15  | -2.07 | -2.09 | -2.28 | -2.22 | -2.16 | -2.04 | -1.94 | -1.77 | -1.47 | -1.01 | -0.72 |
| 76.80  | -2.04 | -2.18 | -2.40 | -2.27 | -2.31 | -2.18 | -1.98 | -1.76 | -1.42 | -1.10 | -0.74 |
| 81.81  | -2.00 | -2.06 | -2.23 | -2.20 | -2.18 | -2.08 | -1.98 | -1.70 | -1.39 | -0.96 | -0.57 |
| 87.22  | -1.94 | -1.98 | -2.14 | -2.11 | -2.17 | -2.02 | -1.80 | -1.67 | -1.34 | -0.92 | -0.57 |
| 93.06  | -2.05 | -2.25 | -2.37 | -2.35 | -2.39 | -2.25 | -1.99 | -1.81 | -1.55 | -1.13 | -0.82 |
| 99.35  | -2.04 | -2.18 | -2.28 | -2.29 | -2.24 | -2.18 | -2.03 | -1.70 | -1.51 | -1.14 | -0.74 |
| 106.13 | -2.31 | -2.32 | -2.41 | -2.43 | -2.40 | -2.39 | -2.19 | -1.95 | -1.63 | -1.18 | -0.85 |
| 113.45 | -2.09 | -2.18 | -2.25 | -2.33 | -2.29 | -2.22 | -2.01 | -1.76 | -1.51 | -1.02 | -0.64 |
| 121.34 | -2.23 | -2.31 | -2.51 | -2.53 | -2.47 | -2.40 | -2.26 | -1.95 | -1.66 | -1.28 | -0.88 |
| 129.86 | -2.20 | -2.40 | -2.50 | -2.49 | -2.57 | -2.47 | -2.22 | -2.08 | -1.68 | -1.29 | -0.97 |
| 139.04 | -2.12 | -2.31 | -2.37 | -2.48 | -2.38 | -2.29 | -2.07 | -1.97 | -1.64 | -1.20 | -0.88 |
| 148.94 | -2.39 | -2.40 | -2.45 | -2.65 | -2.56 | -2.40 | -2.19 | -2.07 | -1.83 | -1.35 | -1.00 |
| 159.62 | -2.28 | -2.43 | -2.51 | -2.50 | -2.55 | -2.39 | -2.22 | -1.98 | -1.67 | -1.39 | -0.87 |
| 171.14 | -2.36 | -2.48 | -2.53 | -2.56 | -2.58 | -2.45 | -2.25 | -2.04 | -1.66 | -1.36 | -0.89 |
| 183.56 | -2.42 | -2.49 | -2.68 | -2.67 | -2.56 | -2.50 | -2.25 | -2.14 | -1.81 | -1.45 | -1.10 |
| 196.96 | -2.46 | -2.50 | -2.67 | -2.59 | -2.63 | -2.58 | -2.31 | -2.08 | -1.77 | -1.44 | -1.02 |
| 211.41 | -2.42 | -2.45 | -2.50 | -2.58 | -2.54 | -2.50 | -2.26 | -2.04 | -1.70 | -1.27 | -0.98 |
| 226.99 | -2.39 | -2.45 | -2.68 | -2.63 | -2.66 | -2.61 | -2.41 | -2.07 | -1.80 | -1.45 | -1.06 |
| 243.80 | -2.37 | -2.52 | -2.67 | -2.64 | -2.57 | -2.48 | -2.47 | -2.16 | -1.85 | -1.46 | -1.09 |
| 261.93 | -2.44 | -2.55 | -2.67 | -2.68 | -2.71 | -2.52 | -2.43 | -2.19 | -1.85 | -1.43 | -1.06 |
| 281.48 | -2.62 | -2.77 | -2.81 | -2.99 | -2.87 | -2.71 | -2.51 | -2.30 | -2.04 | -1.56 | -1.16 |
| 302.56 | -2.48 | -2.56 | -2.75 | -2.69 | -2.71 | -2.65 | -2.40 | -2.25 | -1.95 | -1.48 | -1.13 |
| 325.30 | -2.34 | -2.59 | -2.65 | -2.59 | -2.53 | -2.54 | -2.29 | -2.04 | -1.78 | -1.41 | -1.04 |
| 349.83 | -2.41 | -2.51 | -2.63 | -2.74 | -2.59 | -2.53 | -2.30 | -2.10 | -1.74 | -1.39 | -0.98 |
| 376.28 | -2.46 | -2.60 | -2.77 | -2.68 | -2.62 | -2.59 | -2.42 | -2.17 | -1.91 | -1.46 | -1.10 |
| 404.81 | -2.25 | -2.38 | -2.51 | -2.44 | -2.49 | -2.32 | -2.15 | -1.97 | -1.69 | -1.34 | -0.88 |
| 435.58 | -2.39 | -2.53 | -2.58 | -2.59 | -2.57 | -2.54 | -2.29 | -2.12 | -1.74 | -1.42 | -1.02 |
| 468.76 | -2.36 | -2.43 | -2.60 | -2.64 | -2.53 | -2.50 | -2.22 | -2.04 | -1.74 | -1.41 | -0.97 |
| 504.55 | -2.36 | -2.48 | -2.58 | -2.50 | -2.50 | -2.39 | -2.28 | -2.04 | -1.79 | -1.36 | -1.01 |
| 543.15 | -2.24 | -2.40 | -2.50 | -2.49 | -2.47 | -2.38 | -2.30 | -2.02 | -1.72 | -1.33 | -0.99 |
| 584.78 | -2.34 | -2.46 | -2.55 | -2.51 | -2.46 | -2.50 | -2.29 | -2.05 | -1.73 | -1.41 | -1.00 |
| 629.68 | -2.14 | -2.31 | -2.27 | -2.33 | -2.32 | -2.24 | -2.04 | -1.92 | -1.62 | -1.18 | -0.87 |
| 678.10 | -2.31 | -2.46 | -2.65 | -2.67 | -2.57 | -2.53 | -2.27 | -2.00 | -1.75 | -1.29 | -1.08 |



|         |       |       |       |       |       |       |       |       |       |       |       |
|---------|-------|-------|-------|-------|-------|-------|-------|-------|-------|-------|-------|
| 730.33  | -2.28 | -2.23 | -2.39 | -2.37 | -2.36 | -2.22 | -1.99 | -1.79 | -1.54 | -1.14 | -0.75 |
| 786.65  | -2.13 | -2.22 | -2.27 | -2.21 | -2.31 | -2.13 | -1.99 | -1.77 | -1.43 | -1.08 | -0.68 |
| 847.40  | -2.26 | -2.28 | -2.41 | -2.39 | -2.48 | -2.29 | -2.19 | -1.85 | -1.58 | -1.23 | -0.94 |
| 912.92  | -2.10 | -2.22 | -2.38 | -2.38 | -2.18 | -2.14 | -1.97 | -1.72 | -1.43 | -1.01 | -0.73 |
| 983.58  | -2.04 | -2.28 | -2.35 | -2.24 | -2.28 | -2.13 | -2.03 | -1.83 | -1.51 | -1.06 | -0.70 |
| 1059.78 | -2.02 | -2.04 | -2.17 | -2.20 | -2.26 | -2.00 | -1.84 | -1.60 | -1.37 | -1.00 | -0.67 |
| 1141.98 | -1.83 | -2.06 | -2.20 | -2.11 | -2.26 | -2.04 | -1.90 | -1.63 | -1.35 | -0.93 | -0.68 |
| 1230.62 | -1.79 | -1.95 | -2.07 | -2.04 | -2.01 | -1.89 | -1.73 | -1.45 | -1.20 | -0.87 | -0.56 |
| 1326.23 | -1.79 | -1.91 | -1.95 | -1.93 | -2.00 | -1.76 | -1.74 | -1.53 | -1.26 | -0.76 | -0.41 |
| 1429.34 | -1.78 | -1.83 | -1.99 | -1.85 | -1.89 | -1.73 | -1.65 | -1.42 | -1.19 | -0.68 | -0.37 |
| 1540.54 | -1.62 | -1.69 | -1.78 | -1.85 | -1.72 | -1.79 | -1.52 | -1.31 | -1.00 | -0.63 | -0.33 |
| 1660.48 | -1.68 | -1.83 | -1.86 | -1.93 | -1.85 | -1.79 | -1.53 | -1.39 | -1.11 | -0.70 | -0.36 |
| 1789.83 | -1.60 | -1.77 | -1.82 | -1.77 | -1.78 | -1.69 | -1.58 | -1.23 | -1.03 | -0.62 | -0.32 |
| 1929.34 | -1.37 | -1.59 | -1.70 | -1.64 | -1.51 | -1.50 | -1.26 | -1.06 | -0.79 | -0.45 | -0.12 |
| 2079.80 | -1.42 | -1.49 | -1.58 | -1.50 | -1.54 | -1.41 | -1.30 | -1.05 | -0.76 | -0.40 | -0.09 |
| 2242.08 | -1.42 | -1.40 | -1.58 | -1.50 | -1.48 | -1.43 | -1.25 | -1.08 | -0.78 | -0.37 | -0.05 |
| 2417.10 | -1.31 | -1.42 | -1.35 | -1.52 | -1.48 | -1.21 | -1.10 | -0.95 | -0.65 | -0.27 | -0.04 |
| 2605.85 | -1.13 | -1.24 | -1.38 | -1.29 | -1.26 | -1.22 | -0.99 | -0.86 | -0.60 | -0.21 | 0.00  |
| 2809.43 | -1.09 | -1.15 | -1.28 | -1.20 | -1.15 | -1.06 | -0.96 | -0.77 | -0.54 | -0.20 | 0.12  |
| 3028.99 | -1.14 | -1.25 | -1.40 | -1.35 | -1.35 | -1.17 | -1.07 | -0.74 | -0.50 | -0.20 | 0.01  |
| 3265.79 | -1.02 | -1.16 | -1.11 | -1.19 | -1.10 | -1.01 | -0.80 | -0.68 | -0.44 | -0.09 | 0.21  |
| 3521.18 | -0.96 | -1.02 | -1.04 | -1.03 | -1.00 | -0.98 | -0.81 | -0.59 | -0.37 | -0.03 | 0.24  |
| 3796.62 | -1.05 | -1.13 | -1.26 | -1.13 | -1.16 | -1.11 | -0.94 | -0.78 | -0.55 | -0.22 | 0.08  |

| Wavelength (nm) \ Time (ps) | 506.63 | 508.04 | 509.45 | 510.86 | 512.27 | 513.67 | 515.08 | 516.49 | 517.90 | 519.31 | 520.72 |
|-----------------------------|--------|--------|--------|--------|--------|--------|--------|--------|--------|--------|--------|
| -3.28                       | -0.17  | -0.06  | -0.13  | -0.12  | -0.13  | -0.20  | -0.17  | -0.15  | -0.20  | -0.11  | -0.09  |
| -2.78                       | -0.12  | -0.07  | -0.14  | -0.04  | -0.08  | -0.09  | -0.12  | -0.10  | -0.06  | -0.10  | -0.05  |
| -2.28                       | 0.03   | -0.02  | 0.01   | -0.01  | -0.03  | 0.04   | 0.00   | 0.04   | 0.00   | -0.04  | -0.02  |
| -1.78                       | 0.18   | 0.18   | 0.23   | 0.13   | 0.22   | 0.26   | 0.24   | 0.20   | 0.19   | 0.20   | 0.25   |
| -1.28                       | -0.02  | 0.06   | -0.01  | 0.00   | 0.02   | 0.03   | 0.06   | 0.01   | -0.02  | 0.04   | -0.01  |
| -0.78                       | -0.07  | -0.10  | -0.15  | -0.08  | -0.08  | -0.10  | -0.08  | -0.14  | -0.14  | -0.08  | -0.14  |
| -0.28                       | -0.02  | -0.01  | 0.02   | 0.04   | 0.03   | -0.03  | 0.02   | 0.04   | 0.05   | 0.09   | -0.01  |
| 0.22                        | 0.21   | 0.11   | 0.12   | 0.12   | 0.13   | 0.11   | 0.06   | 0.15   | 0.14   | 0.05   | 0.08   |
| 0.32                        | -0.05  | -0.14  | -0.06  | -0.09  | -0.14  | -0.12  | -0.09  | -0.12  | -0.07  | -0.06  | -0.11  |
| 0.42                        | 0.03   | 0.05   | 0.10   | 0.05   | 0.05   | 0.11   | 0.06   | 0.06   | 0.09   | 0.02   | 0.10   |
| 0.52                        | 0.04   | -0.07  | 0.03   | 0.04   | -0.02  | 0.04   | -0.02  | -0.05  | -0.08  | -0.02  | -0.05  |
| 0.62                        | 0.03   | -0.06  | 0.04   | 0.03   | -0.01  | 0.03   | 0.05   | 0.06   | -0.01  | 0.02   | -0.03  |
| 0.72                        | 0.29   | 0.26   | 0.29   | 0.20   | 0.20   | 0.25   | 0.26   | 0.28   | 0.27   | 0.27   | 0.25   |
| 0.77                        | 0.12   | 0.05   | 0.10   | 0.02   | 0.12   | 0.06   | 0.10   | 0.17   | 0.11   | 0.08   | 0.04   |
| 0.82                        | 0.04   | 0.07   | 0.11   | 0.11   | 0.05   | 0.10   | 0.15   | 0.12   | 0.16   | 0.17   | 0.13   |
| 0.87                        | -0.04  | -0.05  | -0.01  | -0.01  | -0.08  | -0.02  | 0.02   | -0.02  | -0.03  | -0.01  | -0.08  |
| 0.92                        | 0.09   | 0.03   | 0.09   | 0.07   | 0.00   | 0.12   | 0.05   | 0.13   | 0.04   | 0.04   | 0.13   |
| 0.97                        | -0.08  | -0.07  | -0.04  | -0.01  | -0.06  | -0.06  | -0.09  | 0.05   | 0.03   | -0.04  | -0.04  |
| 1.02                        | -0.13  | -0.10  | -0.07  | -0.10  | -0.17  | -0.10  | -0.16  | -0.05  | -0.08  | -0.14  | -0.13  |
| 1.07                        | 0.11   | 0.13   | 0.09   | 0.14   | 0.06   | 0.13   | 0.24   | 0.08   | 0.18   | 0.12   | 0.10   |
| 1.12                        | -0.22  | -0.21  | -0.20  | -0.12  | -0.22  | -0.13  | -0.23  | -0.22  | -0.21  | -0.21  | -0.17  |
| 1.17                        | -0.10  | -0.24  | -0.13  | -0.09  | -0.16  | -0.07  | -0.06  | -0.04  | -0.14  | -0.15  | -0.17  |
| 1.22                        | 0.01   | -0.01  | -0.01  | 0.00   | 0.00   | -0.02  | -0.02  | -0.07  | -0.02  | -0.03  | -0.03  |

|      |       |       |       |       |       |       |       |       |       |       |       |
|------|-------|-------|-------|-------|-------|-------|-------|-------|-------|-------|-------|
| 1.27 | 0.04  | 0.08  | 0.12  | 0.06  | 0.05  | 0.12  | 0.12  | 0.12  | 0.07  | 0.03  | 0.12  |
| 1.32 | -0.06 | -0.06 | -0.02 | -0.09 | 0.00  | -0.01 | -0.04 | -0.03 | 0.04  | 0.02  | 0.01  |
| 1.37 | -0.35 | -0.38 | -0.36 | -0.33 | -0.29 | -0.30 | -0.23 | -0.25 | -0.26 | -0.21 | -0.19 |
| 1.42 | 0.93  | 0.78  | 0.66  | 0.57  | 0.38  | 0.29  | 0.26  | 0.18  | 0.02  | -0.11 | -0.10 |
| 1.47 | 1.60  | 1.78  | 1.96  | 2.16  | 2.13  | 2.17  | 2.17  | 2.08  | 2.00  | 1.89  | 1.71  |
| 1.52 | -0.20 | 0.06  | 0.32  | 0.58  | 0.81  | 1.05  | 1.19  | 1.35  | 1.42  | 1.44  | 1.51  |
| 1.57 | -1.46 | -1.16 | -0.96 | -0.68 | -0.46 | -0.26 | -0.10 | 0.09  | 0.08  | 0.15  | 0.14  |
| 1.62 | -1.85 | -1.59 | -1.37 | -1.16 | -1.05 | -0.85 | -0.70 | -0.54 | -0.54 | -0.56 | -0.67 |
| 1.67 | -1.90 | -1.77 | -1.49 | -1.36 | -1.16 | -0.99 | -0.85 | -0.70 | -0.80 | -0.84 | -0.94 |
| 1.72 | -1.72 | -1.56 | -1.29 | -1.03 | -0.96 | -0.83 | -0.62 | -0.50 | -0.55 | -0.64 | -0.71 |
| 1.77 | -1.60 | -1.42 | -1.07 | -0.86 | -0.66 | -0.51 | -0.42 | -0.33 | -0.27 | -0.42 | -0.43 |
| 1.82 | -1.33 | -1.14 | -0.95 | -0.67 | -0.51 | -0.28 | -0.18 | -0.18 | -0.12 | -0.16 | -0.20 |
| 1.87 | -1.14 | -0.85 | -0.59 | -0.40 | -0.24 | -0.01 | 0.12  | 0.16  | 0.18  | 0.20  | 0.06  |
| 1.92 | -1.15 | -0.96 | -0.60 | -0.39 | -0.19 | 0.00  | 0.17  | 0.26  | 0.24  | 0.31  | 0.13  |
| 1.97 | -1.14 | -0.95 | -0.62 | -0.26 | -0.16 | 0.01  | 0.13  | 0.26  | 0.29  | 0.28  | 0.22  |
| 2.02 | -0.92 | -0.66 | -0.41 | -0.17 | 0.10  | 0.23  | 0.44  | 0.57  | 0.63  | 0.60  | 0.55  |
| 2.07 | -0.96 | -0.75 | -0.39 | -0.26 | 0.00  | 0.23  | 0.33  | 0.50  | 0.55  | 0.54  | 0.48  |
| 2.12 | -0.75 | -0.45 | -0.15 | 0.12  | 0.35  | 0.57  | 0.70  | 0.86  | 0.97  | 0.91  | 0.90  |
| 2.17 | -0.52 | -0.27 | 0.01  | 0.34  | 0.47  | 0.78  | 0.82  | 1.01  | 1.06  | 1.07  | 1.04  |
| 2.22 | -0.62 | -0.48 | -0.01 | 0.22  | 0.46  | 0.62  | 0.90  | 0.98  | 1.02  | 1.02  | 1.01  |
| 2.27 | -0.47 | -0.15 | 0.08  | 0.48  | 0.63  | 0.89  | 1.06  | 1.15  | 1.22  | 1.26  | 1.19  |
| 2.32 | -0.46 | -0.25 | 0.17  | 0.38  | 0.60  | 0.86  | 0.99  | 1.16  | 1.26  | 1.21  | 1.20  |
| 2.37 | -0.58 | -0.30 | 0.02  | 0.27  | 0.51  | 0.72  | 0.94  | 1.08  | 1.17  | 1.19  | 1.15  |
| 2.42 | -0.41 | -0.18 | 0.16  | 0.52  | 0.76  | 0.98  | 1.12  | 1.26  | 1.42  | 1.41  | 1.43  |
| 2.47 | -0.44 | -0.28 | 0.12  | 0.38  | 0.60  | 0.90  | 1.13  | 1.24  | 1.21  | 1.33  | 1.34  |
| 2.52 | -0.31 | -0.11 | 0.16  | 0.55  | 0.82  | 1.04  | 1.16  | 1.34  | 1.46  | 1.48  | 1.48  |
| 2.57 | -0.43 | -0.16 | 0.17  | 0.45  | 0.67  | 0.94  | 1.21  | 1.22  | 1.41  | 1.39  | 1.41  |
| 2.62 | -0.14 | 0.17  | 0.54  | 0.81  | 1.10  | 1.30  | 1.45  | 1.73  | 1.74  | 1.81  | 1.74  |
| 2.67 | -0.37 | -0.15 | 0.20  | 0.50  | 0.75  | 1.07  | 1.26  | 1.43  | 1.41  | 1.58  | 1.48  |
| 2.72 | -0.21 | 0.10  | 0.46  | 0.66  | 1.02  | 1.29  | 1.46  | 1.66  | 1.78  | 1.78  | 1.78  |
| 2.77 | 0.03  | 0.31  | 0.67  | 1.00  | 1.22  | 1.50  | 1.71  | 1.83  | 1.97  | 1.99  | 1.94  |
| 2.82 | -0.10 | 0.16  | 0.55  | 0.88  | 1.12  | 1.42  | 1.63  | 1.78  | 1.81  | 1.85  | 1.88  |
| 2.87 | -0.18 | 0.03  | 0.38  | 0.67  | 0.99  | 1.31  | 1.52  | 1.60  | 1.75  | 1.79  | 1.80  |
| 2.92 | -0.18 | 0.20  | 0.47  | 0.78  | 1.09  | 1.32  | 1.55  | 1.71  | 1.79  | 1.82  | 1.85  |
| 2.97 | -0.13 | 0.09  | 0.41  | 0.82  | 1.14  | 1.37  | 1.63  | 1.79  | 1.83  | 1.96  | 1.95  |
| 3.02 | -0.02 | 0.26  | 0.63  | 0.89  | 1.16  | 1.50  | 1.65  | 1.87  | 1.97  | 2.08  | 2.04  |
| 3.07 | -0.20 | 0.14  | 0.46  | 0.90  | 1.15  | 1.43  | 1.59  | 1.84  | 1.93  | 2.05  | 2.00  |
| 3.12 | -0.05 | 0.29  | 0.68  | 1.09  | 1.28  | 1.55  | 1.84  | 2.03  | 2.13  | 2.15  | 2.19  |
| 3.17 | 0.00  | 0.32  | 0.58  | 1.03  | 1.22  | 1.54  | 1.78  | 1.99  | 2.13  | 2.19  | 2.30  |
| 3.22 | 0.01  | 0.28  | 0.66  | 1.03  | 1.25  | 1.58  | 1.87  | 2.00  | 2.16  | 2.29  | 2.21  |
| 3.27 | -0.10 | 0.37  | 0.72  | 1.06  | 1.35  | 1.61  | 1.78  | 2.04  | 2.14  | 2.19  | 2.28  |
| 3.32 | -0.01 | 0.29  | 0.81  | 1.10  | 1.40  | 1.66  | 1.85  | 2.11  | 2.26  | 2.32  | 2.36  |
| 3.37 | -0.15 | 0.16  | 0.54  | 0.86  | 1.12  | 1.37  | 1.63  | 1.83  | 2.09  | 2.03  | 2.05  |
| 3.42 | 0.04  | 0.35  | 0.80  | 1.05  | 1.40  | 1.67  | 2.01  | 2.17  | 2.31  | 2.39  | 2.37  |
| 3.47 | -0.16 | 0.23  | 0.65  | 0.99  | 1.26  | 1.64  | 1.84  | 2.03  | 2.19  | 2.27  | 2.27  |
| 3.52 | -0.16 | 0.25  | 0.65  | 0.99  | 1.25  | 1.56  | 1.76  | 2.02  | 2.12  | 2.18  | 2.16  |
| 3.57 | -0.05 | 0.23  | 0.63  | 0.99  | 1.24  | 1.61  | 1.86  | 2.06  | 2.20  | 2.26  | 2.27  |
| 3.62 | 0.16  | 0.42  | 0.79  | 1.10  | 1.39  | 1.76  | 2.02  | 2.18  | 2.29  | 2.40  | 2.46  |
| 3.67 | -0.08 | 0.20  | 0.61  | 0.99  | 1.29  | 1.58  | 1.79  | 1.93  | 2.13  | 2.17  | 2.21  |
| 3.72 | 0.10  | 0.35  | 0.77  | 1.15  | 1.45  | 1.69  | 2.07  | 2.19  | 2.40  | 2.43  | 2.45  |

|       |      |      |      |      |      |      |      |      |      |      |      |
|-------|------|------|------|------|------|------|------|------|------|------|------|
| 3.92  | 0.06 | 0.39 | 0.85 | 1.21 | 1.49 | 1.77 | 2.13 | 2.30 | 2.52 | 2.54 | 2.57 |
| 4.12  | 0.07 | 0.49 | 0.84 | 1.14 | 1.52 | 1.80 | 2.16 | 2.33 | 2.43 | 2.57 | 2.51 |
| 4.32  | 0.09 | 0.36 | 0.78 | 1.23 | 1.53 | 1.79 | 2.14 | 2.33 | 2.45 | 2.50 | 2.50 |
| 4.52  | 0.04 | 0.40 | 0.86 | 1.24 | 1.44 | 1.81 | 2.04 | 2.27 | 2.41 | 2.56 | 2.63 |
| 4.72  | 0.10 | 0.40 | 0.80 | 1.18 | 1.41 | 1.82 | 2.12 | 2.30 | 2.44 | 2.62 | 2.56 |
| 4.92  | 0.31 | 0.67 | 1.03 | 1.37 | 1.75 | 2.11 | 2.39 | 2.68 | 2.76 | 2.88 | 2.87 |
| 5.12  | 0.33 | 0.62 | 0.98 | 1.38 | 1.75 | 2.03 | 2.34 | 2.60 | 2.67 | 2.77 | 2.78 |
| 5.32  | 0.21 | 0.58 | 1.13 | 1.46 | 1.81 | 2.11 | 2.45 | 2.72 | 2.80 | 2.95 | 2.99 |
| 5.52  | 0.34 | 0.79 | 1.14 | 1.51 | 1.84 | 2.16 | 2.50 | 2.75 | 2.91 | 3.02 | 2.94 |
| 5.72  | 0.33 | 0.69 | 1.10 | 1.59 | 1.90 | 2.30 | 2.50 | 2.75 | 2.90 | 3.05 | 3.08 |
| 5.92  | 0.16 | 0.53 | 0.93 | 1.43 | 1.67 | 2.01 | 2.27 | 2.49 | 2.69 | 2.83 | 2.86 |
| 6.12  | 0.19 | 0.57 | 1.17 | 1.48 | 1.82 | 2.15 | 2.42 | 2.72 | 2.86 | 2.95 | 3.01 |
| 6.32  | 0.06 | 0.47 | 0.91 | 1.31 | 1.58 | 2.00 | 2.15 | 2.48 | 2.63 | 2.69 | 2.72 |
| 6.52  | 0.33 | 0.65 | 1.03 | 1.51 | 1.83 | 2.19 | 2.41 | 2.70 | 2.86 | 2.99 | 3.00 |
| 6.72  | 0.43 | 0.83 | 1.29 | 1.66 | 2.10 | 2.31 | 2.61 | 2.89 | 3.00 | 3.21 | 3.24 |
| 6.92  | 0.14 | 0.56 | 0.92 | 1.42 | 1.71 | 2.13 | 2.42 | 2.61 | 2.74 | 2.92 | 2.92 |
| 7.12  | 0.28 | 0.63 | 1.05 | 1.49 | 1.83 | 2.21 | 2.45 | 2.73 | 2.92 | 2.98 | 3.05 |
| 7.32  | 0.28 | 0.60 | 1.06 | 1.51 | 1.91 | 2.14 | 2.53 | 2.78 | 2.94 | 2.98 | 3.04 |
| 7.52  | 0.28 | 0.60 | 1.09 | 1.49 | 1.88 | 2.24 | 2.49 | 2.77 | 2.97 | 3.02 | 3.03 |
| 7.72  | 0.24 | 0.69 | 1.13 | 1.49 | 1.82 | 2.21 | 2.64 | 2.77 | 2.91 | 3.06 | 3.06 |
| 7.92  | 0.26 | 0.59 | 1.04 | 1.52 | 1.81 | 2.17 | 2.44 | 2.76 | 2.91 | 3.02 | 3.10 |
| 8.12  | 0.37 | 0.70 | 1.22 | 1.63 | 1.96 | 2.26 | 2.64 | 2.87 | 3.07 | 3.14 | 3.22 |
| 8.32  | 0.39 | 0.79 | 1.25 | 1.65 | 2.04 | 2.31 | 2.59 | 2.85 | 3.01 | 3.12 | 3.25 |
| 8.52  | 0.18 | 0.58 | 1.07 | 1.49 | 1.79 | 2.13 | 2.44 | 2.72 | 2.86 | 2.92 | 3.02 |
| 8.72  | 0.16 | 0.53 | 0.99 | 1.52 | 1.78 | 2.05 | 2.37 | 2.74 | 2.87 | 3.03 | 3.02 |
| 8.92  | 0.09 | 0.56 | 0.94 | 1.38 | 1.74 | 2.09 | 2.39 | 2.66 | 2.89 | 2.97 | 3.01 |
| 9.12  | 0.29 | 0.70 | 1.08 | 1.58 | 1.92 | 2.30 | 2.57 | 2.80 | 3.04 | 3.11 | 3.17 |
| 9.32  | 0.24 | 0.60 | 1.07 | 1.50 | 1.73 | 2.16 | 2.41 | 2.67 | 2.78 | 2.99 | 3.04 |
| 9.52  | 0.18 | 0.62 | 1.03 | 1.54 | 1.86 | 2.29 | 2.55 | 2.82 | 3.05 | 3.21 | 3.18 |
| 9.72  | 0.24 | 0.63 | 1.11 | 1.50 | 1.84 | 2.14 | 2.51 | 2.82 | 2.90 | 3.09 | 3.06 |
| 9.92  | 0.44 | 0.76 | 1.29 | 1.66 | 2.02 | 2.41 | 2.65 | 2.98 | 3.17 | 3.21 | 3.31 |
| 10.12 | 0.28 | 0.69 | 1.15 | 1.52 | 1.86 | 2.33 | 2.59 | 2.85 | 3.08 | 3.21 | 3.24 |
| 10.32 | 0.21 | 0.62 | 1.05 | 1.48 | 1.80 | 2.16 | 2.40 | 2.61 | 2.77 | 2.95 | 2.99 |
| 10.52 | 0.28 | 0.57 | 1.02 | 1.43 | 1.82 | 2.27 | 2.48 | 2.73 | 3.01 | 2.96 | 3.13 |
| 10.72 | 0.34 | 0.77 | 1.20 | 1.61 | 1.91 | 2.34 | 2.69 | 2.96 | 3.10 | 3.18 | 3.24 |
| 10.92 | 0.28 | 0.62 | 1.15 | 1.60 | 1.87 | 2.26 | 2.58 | 2.90 | 3.03 | 3.09 | 3.09 |
| 11.12 | 0.28 | 0.60 | 1.08 | 1.46 | 1.84 | 2.27 | 2.51 | 2.82 | 3.00 | 3.11 | 3.17 |
| 11.32 | 0.45 | 0.77 | 1.26 | 1.79 | 2.13 | 2.51 | 2.75 | 3.03 | 3.22 | 3.33 | 3.34 |
| 11.52 | 0.32 | 0.61 | 1.15 | 1.57 | 1.83 | 2.21 | 2.56 | 2.77 | 2.99 | 3.08 | 3.08 |
| 11.72 | 0.29 | 0.67 | 1.11 | 1.53 | 1.87 | 2.29 | 2.58 | 2.86 | 3.01 | 3.15 | 3.23 |
| 11.92 | 0.20 | 0.50 | 0.97 | 1.44 | 1.87 | 2.14 | 2.37 | 2.75 | 2.85 | 2.98 | 3.00 |
| 12.12 | 0.26 | 0.64 | 1.09 | 1.55 | 1.87 | 2.32 | 2.63 | 2.94 | 3.03 | 3.20 | 3.23 |
| 12.32 | 0.32 | 0.71 | 1.14 | 1.54 | 1.93 | 2.32 | 2.67 | 2.88 | 3.14 | 3.22 | 3.25 |
| 12.52 | 0.26 | 0.57 | 1.09 | 1.55 | 1.81 | 2.27 | 2.54 | 2.80 | 2.98 | 3.04 | 3.11 |
| 12.72 | 0.52 | 0.87 | 1.29 | 1.76 | 2.09 | 2.49 | 2.75 | 3.09 | 3.23 | 3.29 | 3.31 |
| 12.92 | 0.38 | 0.75 | 1.18 | 1.66 | 2.03 | 2.39 | 2.65 | 2.96 | 3.22 | 3.28 | 3.36 |
| 13.12 | 0.19 | 0.70 | 1.00 | 1.46 | 1.78 | 2.15 | 2.48 | 2.70 | 2.89 | 3.00 | 3.05 |
| 13.32 | 0.15 | 0.54 | 1.00 | 1.52 | 1.89 | 2.24 | 2.53 | 2.78 | 3.04 | 3.13 | 3.12 |
| 13.52 | 0.30 | 0.71 | 1.13 | 1.61 | 1.89 | 2.21 | 2.54 | 2.79 | 2.98 | 3.15 | 3.14 |
| 13.72 | 0.43 | 0.85 | 1.34 | 1.74 | 2.04 | 2.49 | 2.87 | 3.02 | 3.26 | 3.35 | 3.36 |

|       |       |      |      |      |      |      |      |      |      |      |      |
|-------|-------|------|------|------|------|------|------|------|------|------|------|
| 13.92 | 0.28  | 0.64 | 1.10 | 1.52 | 1.86 | 2.32 | 2.61 | 2.85 | 2.99 | 3.16 | 3.17 |
| 14.00 | 0.40  | 0.77 | 1.27 | 1.72 | 2.03 | 2.52 | 2.71 | 3.08 | 3.31 | 3.44 | 3.41 |
| 14.08 | 0.32  | 0.70 | 1.13 | 1.61 | 1.93 | 2.35 | 2.59 | 2.87 | 3.02 | 3.16 | 3.18 |
| 14.17 | 0.23  | 0.67 | 1.13 | 1.48 | 1.90 | 2.30 | 2.52 | 2.85 | 2.98 | 3.11 | 3.16 |
| 14.27 | 0.17  | 0.59 | 0.99 | 1.47 | 1.83 | 2.18 | 2.60 | 2.75 | 2.94 | 3.18 | 3.14 |
| 14.38 | 0.34  | 0.72 | 1.20 | 1.62 | 1.90 | 2.28 | 2.67 | 2.92 | 3.04 | 3.13 | 3.17 |
| 14.49 | 0.26  | 0.71 | 1.13 | 1.49 | 1.83 | 2.25 | 2.59 | 2.84 | 2.97 | 3.12 | 3.16 |
| 14.61 | 0.20  | 0.57 | 0.95 | 1.44 | 1.84 | 2.17 | 2.57 | 2.65 | 2.84 | 3.01 | 3.07 |
| 14.75 | 0.14  | 0.53 | 1.01 | 1.42 | 1.80 | 2.16 | 2.42 | 2.72 | 2.87 | 3.02 | 3.09 |
| 14.89 | 0.62  | 0.96 | 1.49 | 1.89 | 2.34 | 2.69 | 3.04 | 3.32 | 3.41 | 3.56 | 3.65 |
| 15.05 | 0.16  | 0.53 | 1.11 | 1.48 | 1.84 | 2.31 | 2.59 | 2.84 | 3.03 | 3.17 | 3.10 |
| 15.21 | 0.40  | 0.72 | 1.23 | 1.63 | 2.01 | 2.43 | 2.73 | 3.12 | 3.22 | 3.27 | 3.35 |
| 15.39 | 0.34  | 0.78 | 1.19 | 1.63 | 1.98 | 2.30 | 2.66 | 2.95 | 3.10 | 3.20 | 3.25 |
| 15.59 | 0.19  | 0.63 | 1.09 | 1.51 | 1.85 | 2.29 | 2.54 | 2.80 | 3.08 | 3.10 | 3.17 |
| 15.80 | 0.32  | 0.74 | 1.15 | 1.67 | 2.03 | 2.49 | 2.72 | 3.06 | 3.27 | 3.30 | 3.36 |
| 16.02 | 0.42  | 0.72 | 1.06 | 1.62 | 1.91 | 2.38 | 2.68 | 2.89 | 3.00 | 3.16 | 3.20 |
| 16.27 | 0.44  | 0.83 | 1.27 | 1.73 | 2.08 | 2.50 | 2.83 | 3.13 | 3.27 | 3.40 | 3.36 |
| 16.53 | 0.15  | 0.56 | 1.05 | 1.44 | 1.89 | 2.27 | 2.57 | 2.74 | 3.01 | 3.15 | 3.12 |
| 16.81 | 0.13  | 0.52 | 1.06 | 1.45 | 1.81 | 2.21 | 2.55 | 2.84 | 2.96 | 3.02 | 3.08 |
| 17.12 | 0.35  | 0.80 | 1.35 | 1.67 | 2.04 | 2.41 | 2.73 | 2.98 | 3.11 | 3.31 | 3.37 |
| 17.45 | 0.20  | 0.53 | 1.06 | 1.51 | 1.75 | 2.31 | 2.54 | 2.78 | 2.90 | 2.99 | 3.10 |
| 17.81 | 0.33  | 0.73 | 1.17 | 1.71 | 2.03 | 2.47 | 2.76 | 3.05 | 3.22 | 3.35 | 3.40 |
| 18.19 | 0.29  | 0.78 | 1.24 | 1.66 | 2.04 | 2.46 | 2.79 | 3.09 | 3.30 | 3.40 | 3.44 |
| 18.60 | 0.38  | 0.70 | 1.25 | 1.69 | 2.06 | 2.44 | 2.82 | 3.03 | 3.22 | 3.36 | 3.46 |
| 19.05 | 0.32  | 0.75 | 1.19 | 1.65 | 2.06 | 2.49 | 2.82 | 3.03 | 3.28 | 3.37 | 3.33 |
| 19.53 | 0.20  | 0.50 | 0.99 | 1.47 | 1.85 | 2.25 | 2.60 | 2.86 | 2.99 | 3.11 | 3.11 |
| 20.05 | 0.16  | 0.61 | 1.04 | 1.49 | 1.84 | 2.28 | 2.60 | 2.88 | 3.11 | 3.13 | 3.24 |
| 20.61 | 0.25  | 0.59 | 1.09 | 1.60 | 2.00 | 2.39 | 2.68 | 3.03 | 3.15 | 3.29 | 3.36 |
| 21.22 | 0.30  | 0.61 | 1.18 | 1.62 | 2.05 | 2.42 | 2.72 | 2.98 | 3.16 | 3.21 | 3.26 |
| 21.87 | 0.22  | 0.56 | 1.10 | 1.53 | 1.91 | 2.36 | 2.62 | 2.95 | 3.12 | 3.18 | 3.32 |
| 22.57 | 0.26  | 0.77 | 1.26 | 1.69 | 1.93 | 2.40 | 2.69 | 2.94 | 3.24 | 3.25 | 3.31 |
| 23.33 | 0.20  | 0.67 | 1.22 | 1.65 | 2.08 | 2.40 | 2.76 | 3.00 | 3.21 | 3.22 | 3.28 |
| 24.15 | 0.21  | 0.62 | 1.05 | 1.56 | 1.95 | 2.23 | 2.62 | 2.94 | 3.11 | 3.17 | 3.19 |
| 25.03 | 0.18  | 0.49 | 1.06 | 1.58 | 1.90 | 2.26 | 2.63 | 2.77 | 2.99 | 3.12 | 3.22 |
| 25.98 | 0.19  | 0.62 | 1.17 | 1.63 | 2.00 | 2.44 | 2.77 | 3.05 | 3.14 | 3.37 | 3.34 |
| 27.01 | 0.07  | 0.56 | 0.98 | 1.49 | 1.93 | 2.24 | 2.55 | 2.86 | 3.07 | 3.16 | 3.15 |
| 28.11 | 0.34  | 0.68 | 1.25 | 1.56 | 1.98 | 2.37 | 2.84 | 3.07 | 3.20 | 3.38 | 3.40 |
| 29.30 | 0.19  | 0.65 | 1.14 | 1.56 | 1.89 | 2.33 | 2.66 | 2.93 | 3.11 | 3.26 | 3.23 |
| 30.59 | 0.20  | 0.61 | 1.11 | 1.55 | 2.02 | 2.37 | 2.75 | 2.88 | 3.16 | 3.32 | 3.29 |
| 31.98 | -0.14 | 0.40 | 0.91 | 1.33 | 1.74 | 2.06 | 2.44 | 2.72 | 2.91 | 3.05 | 3.03 |
| 33.47 | 0.17  | 0.58 | 1.02 | 1.50 | 1.85 | 2.30 | 2.60 | 2.86 | 2.98 | 3.19 | 3.20 |
| 35.09 | 0.11  | 0.58 | 0.94 | 1.41 | 1.77 | 2.18 | 2.55 | 2.83 | 3.02 | 3.13 | 3.11 |
| 36.83 | 0.02  | 0.47 | 0.95 | 1.38 | 1.80 | 2.17 | 2.50 | 2.79 | 3.05 | 3.07 | 3.14 |
| 38.71 | 0.19  | 0.60 | 0.99 | 1.52 | 1.99 | 2.28 | 2.62 | 2.86 | 3.12 | 3.22 | 3.20 |
| 40.73 | 0.18  | 0.59 | 1.05 | 1.58 | 1.93 | 2.35 | 2.72 | 2.94 | 3.09 | 3.18 | 3.31 |
| 42.92 | 0.15  | 0.56 | 0.96 | 1.51 | 1.90 | 2.19 | 2.50 | 2.86 | 2.97 | 3.10 | 3.05 |
| 45.27 | 0.10  | 0.45 | 0.94 | 1.40 | 1.75 | 2.09 | 2.47 | 2.77 | 2.91 | 3.06 | 3.08 |
| 47.81 | 0.02  | 0.56 | 0.91 | 1.53 | 1.84 | 2.22 | 2.58 | 2.83 | 3.00 | 3.23 | 3.19 |
| 50.55 | -0.04 | 0.33 | 0.71 | 1.10 | 1.52 | 1.94 | 2.26 | 2.43 | 2.65 | 2.78 | 2.78 |
| 53.51 | 0.10  | 0.51 | 1.07 | 1.48 | 1.80 | 2.30 | 2.67 | 2.88 | 3.01 | 3.13 | 3.19 |

|         |       |       |      |      |      |      |      |      |      |      |      |
|---------|-------|-------|------|------|------|------|------|------|------|------|------|
| 56.69   | -0.04 | 0.32  | 0.80 | 1.30 | 1.69 | 2.03 | 2.36 | 2.74 | 2.87 | 2.97 | 2.96 |
| 60.13   | -0.15 | 0.28  | 0.78 | 1.26 | 1.65 | 1.97 | 2.34 | 2.62 | 2.77 | 2.89 | 2.96 |
| 63.84   | -0.13 | 0.24  | 0.85 | 1.33 | 1.73 | 2.19 | 2.51 | 2.81 | 2.98 | 3.09 | 3.08 |
| 67.83   | -0.24 | 0.20  | 0.71 | 1.11 | 1.57 | 1.99 | 2.33 | 2.60 | 2.71 | 2.94 | 2.87 |
| 72.15   | -0.19 | 0.21  | 0.72 | 1.14 | 1.55 | 1.96 | 2.33 | 2.59 | 2.75 | 2.85 | 2.88 |
| 76.80   | -0.30 | 0.10  | 0.61 | 1.03 | 1.43 | 1.94 | 2.11 | 2.49 | 2.66 | 2.74 | 2.76 |
| 81.81   | -0.20 | 0.32  | 0.81 | 1.29 | 1.75 | 2.16 | 2.41 | 2.81 | 2.99 | 3.06 | 3.06 |
| 87.22   | -0.20 | 0.29  | 0.75 | 1.25 | 1.60 | 2.00 | 2.32 | 2.59 | 2.80 | 2.86 | 2.90 |
| 93.06   | -0.30 | 0.09  | 0.64 | 1.09 | 1.48 | 1.97 | 2.29 | 2.54 | 2.67 | 2.84 | 2.83 |
| 99.35   | -0.19 | 0.19  | 0.69 | 1.24 | 1.62 | 1.95 | 2.37 | 2.63 | 2.74 | 2.92 | 2.92 |
| 106.13  | -0.41 | 0.17  | 0.58 | 1.05 | 1.47 | 1.83 | 2.23 | 2.47 | 2.60 | 2.75 | 2.80 |
| 113.45  | -0.14 | 0.22  | 0.77 | 1.29 | 1.62 | 2.14 | 2.43 | 2.75 | 2.86 | 3.00 | 2.96 |
| 121.34  | -0.38 | -0.06 | 0.58 | 0.94 | 1.40 | 1.71 | 2.12 | 2.41 | 2.61 | 2.71 | 2.72 |
| 129.86  | -0.42 | -0.04 | 0.38 | 0.91 | 1.30 | 1.73 | 1.96 | 2.32 | 2.56 | 2.66 | 2.62 |
| 139.04  | -0.33 | 0.03  | 0.60 | 1.07 | 1.47 | 1.87 | 2.16 | 2.42 | 2.59 | 2.75 | 2.82 |
| 148.94  | -0.56 | -0.09 | 0.37 | 0.88 | 1.26 | 1.66 | 1.96 | 2.23 | 2.41 | 2.48 | 2.49 |
| 159.62  | -0.39 | 0.04  | 0.52 | 1.02 | 1.38 | 1.79 | 2.20 | 2.44 | 2.68 | 2.78 | 2.76 |
| 171.14  | -0.51 | -0.04 | 0.51 | 1.01 | 1.34 | 1.78 | 2.14 | 2.45 | 2.57 | 2.71 | 2.70 |
| 183.56  | -0.63 | -0.23 | 0.22 | 0.74 | 1.10 | 1.50 | 1.79 | 2.16 | 2.28 | 2.38 | 2.40 |
| 196.96  | -0.61 | -0.09 | 0.41 | 0.86 | 1.31 | 1.77 | 2.01 | 2.38 | 2.51 | 2.68 | 2.68 |
| 211.41  | -0.44 | -0.04 | 0.47 | 0.97 | 1.38 | 1.77 | 2.14 | 2.42 | 2.60 | 2.76 | 2.66 |
| 226.99  | -0.52 | -0.08 | 0.38 | 0.90 | 1.37 | 1.74 | 2.05 | 2.37 | 2.56 | 2.62 | 2.68 |
| 243.80  | -0.66 | -0.21 | 0.26 | 0.76 | 1.11 | 1.53 | 1.79 | 2.17 | 2.23 | 2.39 | 2.51 |
| 261.93  | -0.56 | -0.04 | 0.37 | 0.83 | 1.30 | 1.72 | 2.11 | 2.40 | 2.57 | 2.70 | 2.67 |
| 281.48  | -0.72 | -0.19 | 0.21 | 0.74 | 1.09 | 1.58 | 1.91 | 2.22 | 2.43 | 2.61 | 2.55 |
| 302.56  | -0.64 | -0.18 | 0.33 | 0.80 | 1.18 | 1.55 | 1.92 | 2.26 | 2.41 | 2.54 | 2.51 |
| 325.30  | -0.47 | -0.16 | 0.41 | 0.89 | 1.36 | 1.74 | 2.08 | 2.40 | 2.53 | 2.66 | 2.65 |
| 349.83  | -0.58 | -0.17 | 0.33 | 0.83 | 1.27 | 1.75 | 1.98 | 2.26 | 2.39 | 2.54 | 2.58 |
| 376.28  | -0.58 | -0.12 | 0.37 | 0.86 | 1.28 | 1.59 | 1.97 | 2.26 | 2.48 | 2.56 | 2.60 |
| 404.81  | -0.39 | -0.03 | 0.56 | 1.07 | 1.34 | 1.87 | 2.18 | 2.32 | 2.55 | 2.66 | 2.79 |
| 435.58  | -0.53 | -0.13 | 0.43 | 0.91 | 1.27 | 1.64 | 2.01 | 2.29 | 2.41 | 2.53 | 2.50 |
| 468.76  | -0.53 | -0.07 | 0.36 | 0.94 | 1.36 | 1.74 | 2.01 | 2.34 | 2.44 | 2.57 | 2.55 |
| 504.55  | -0.50 | -0.11 | 0.28 | 0.89 | 1.25 | 1.64 | 1.96 | 2.23 | 2.37 | 2.50 | 2.51 |
| 543.15  | -0.46 | 0.01  | 0.48 | 0.87 | 1.30 | 1.66 | 1.99 | 2.27 | 2.45 | 2.56 | 2.66 |
| 584.78  | -0.56 | -0.07 | 0.35 | 0.73 | 1.25 | 1.56 | 1.93 | 2.21 | 2.34 | 2.53 | 2.57 |
| 629.68  | -0.36 | 0.06  | 0.47 | 0.95 | 1.37 | 1.77 | 2.01 | 2.23 | 2.47 | 2.58 | 2.61 |
| 678.10  | -0.48 | 0.00  | 0.39 | 0.90 | 1.29 | 1.72 | 2.01 | 2.34 | 2.50 | 2.54 | 2.62 |
| 730.33  | -0.31 | 0.13  | 0.62 | 1.16 | 1.58 | 1.98 | 2.26 | 2.59 | 2.76 | 2.83 | 2.85 |
| 786.65  | -0.29 | 0.12  | 0.63 | 1.06 | 1.49 | 1.83 | 2.21 | 2.51 | 2.63 | 2.76 | 2.73 |
| 847.40  | -0.38 | 0.02  | 0.55 | 0.96 | 1.40 | 1.81 | 2.10 | 2.31 | 2.60 | 2.65 | 2.69 |
| 912.92  | -0.22 | 0.23  | 0.72 | 1.14 | 1.61 | 1.97 | 2.25 | 2.54 | 2.72 | 2.90 | 2.88 |
| 983.58  | -0.24 | 0.20  | 0.70 | 1.19 | 1.54 | 1.89 | 2.20 | 2.51 | 2.66 | 2.78 | 2.76 |
| 1059.78 | -0.12 | 0.24  | 0.84 | 1.21 | 1.59 | 1.99 | 2.32 | 2.53 | 2.74 | 2.85 | 2.90 |
| 1141.98 | -0.06 | 0.30  | 0.70 | 1.09 | 1.57 | 2.01 | 2.24 | 2.48 | 2.70 | 2.83 | 2.79 |
| 1230.62 | -0.17 | 0.24  | 0.72 | 1.13 | 1.48 | 1.89 | 2.15 | 2.45 | 2.61 | 2.69 | 2.73 |
| 1326.23 | -0.05 | 0.40  | 0.80 | 1.27 | 1.76 | 2.01 | 2.39 | 2.69 | 2.74 | 2.84 | 2.85 |
| 1429.34 | 0.02  | 0.51  | 0.94 | 1.39 | 1.81 | 2.22 | 2.56 | 2.76 | 2.91 | 3.06 | 3.03 |
| 1540.54 | 0.19  | 0.58  | 1.01 | 1.48 | 1.78 | 2.19 | 2.57 | 2.78 | 3.01 | 3.04 | 3.02 |
| 1660.48 | 0.03  | 0.49  | 1.00 | 1.43 | 1.75 | 2.12 | 2.44 | 2.78 | 2.92 | 2.93 | 2.98 |
| 1789.83 | 0.11  | 0.56  | 0.91 | 1.47 | 1.83 | 2.18 | 2.44 | 2.75 | 2.84 | 3.03 | 3.01 |

|         |      |      |      |      |      |      |      |      |      |      |      |
|---------|------|------|------|------|------|------|------|------|------|------|------|
| 1929.34 | 0.36 | 0.73 | 1.18 | 1.63 | 2.03 | 2.37 | 2.65 | 2.87 | 3.08 | 3.17 | 3.22 |
| 2079.80 | 0.38 | 0.78 | 1.29 | 1.63 | 2.01 | 2.36 | 2.58 | 2.94 | 3.06 | 3.10 | 3.20 |
| 2242.08 | 0.37 | 0.78 | 1.24 | 1.55 | 1.99 | 2.35 | 2.60 | 2.85 | 3.00 | 3.13 | 3.10 |
| 2417.10 | 0.46 | 0.85 | 1.22 | 1.68 | 2.06 | 2.44 | 2.68 | 2.88 | 3.12 | 3.20 | 3.19 |
| 2605.85 | 0.54 | 0.84 | 1.29 | 1.69 | 2.07 | 2.41 | 2.72 | 2.99 | 3.12 | 3.23 | 3.17 |
| 2809.43 | 0.50 | 0.80 | 1.27 | 1.68 | 1.93 | 2.29 | 2.55 | 2.68 | 2.92 | 2.99 | 2.96 |
| 3028.99 | 0.50 | 0.84 | 1.34 | 1.63 | 1.97 | 2.31 | 2.71 | 2.81 | 3.00 | 3.02 | 3.10 |
| 3265.79 | 0.69 | 0.94 | 1.44 | 1.83 | 2.14 | 2.46 | 2.72 | 2.94 | 3.13 | 3.19 | 3.20 |
| 3521.18 | 0.62 | 1.04 | 1.42 | 1.73 | 2.13 | 2.43 | 2.72 | 2.99 | 3.06 | 3.22 | 3.20 |
| 3796.62 | 0.37 | 0.78 | 1.25 | 1.59 | 1.86 | 2.21 | 2.44 | 2.67 | 2.83 | 2.86 | 2.92 |

| Wavelength (nm) \ Time (ps) | 522.13 | 523.53 | 524.94 | 526.35 | 527.76 | 529.17 | 530.58 | 531.99 | 533.39 | 534.80 | 536.21 |
|-----------------------------|--------|--------|--------|--------|--------|--------|--------|--------|--------|--------|--------|
| -3.28                       | -0.13  | -0.18  | -0.14  | -0.13  | -0.12  | -0.19  | -0.17  | -0.12  | -0.14  | -0.17  | -0.15  |
| -2.78                       | -0.08  | -0.11  | -0.09  | -0.05  | -0.11  | -0.08  | -0.15  | -0.09  | -0.14  | -0.12  | -0.13  |
| -2.28                       | -0.06  | 0.04   | -0.05  | -0.12  | 0.03   | -0.03  | 0.00   | -0.05  | -0.05  | -0.02  | -0.06  |
| -1.78                       | 0.31   | 0.23   | 0.27   | 0.25   | 0.22   | 0.23   | 0.21   | 0.23   | 0.24   | 0.25   | 0.22   |
| -1.28                       | -0.03  | 0.00   | 0.01   | -0.02  | 0.00   | 0.00   | 0.03   | -0.03  | 0.03   | 0.02   | 0.01   |
| -0.78                       | -0.13  | -0.10  | -0.15  | -0.06  | -0.12  | -0.09  | -0.12  | -0.08  | -0.10  | -0.09  | -0.09  |
| -0.28                       | 0.03   | 0.01   | 0.02   | 0.01   | 0.03   | 0.05   | 0.04   | 0.06   | 0.12   | 0.08   | 0.06   |
| 0.22                        | 0.12   | 0.10   | 0.10   | 0.13   | 0.08   | 0.09   | 0.15   | 0.07   | 0.07   | 0.09   | 0.12   |
| 0.32                        | -0.10  | -0.05  | -0.10  | -0.07  | -0.08  | -0.08  | -0.08  | -0.06  | -0.07  | -0.06  | -0.02  |
| 0.42                        | 0.05   | 0.06   | 0.12   | 0.06   | 0.07   | 0.12   | 0.09   | 0.07   | 0.05   | 0.04   | 0.07   |
| 0.52                        | 0.00   | -0.10  | -0.02  | 0.00   | -0.02  | -0.04  | -0.05  | 0.00   | -0.02  | -0.04  | -0.03  |
| 0.62                        | 0.05   | 0.01   | 0.03   | 0.05   | 0.01   | 0.09   | 0.05   | 0.03   | 0.05   | 0.10   | 0.00   |
| 0.72                        | 0.27   | 0.27   | 0.26   | 0.22   | 0.21   | 0.25   | 0.22   | 0.24   | 0.26   | 0.12   | 0.19   |
| 0.77                        | 0.07   | 0.01   | -0.02  | 0.05   | 0.06   | 0.07   | 0.12   | 0.06   | 0.05   | 0.05   | 0.05   |
| 0.82                        | 0.10   | 0.14   | 0.07   | 0.14   | 0.09   | 0.03   | 0.03   | 0.07   | 0.19   | 0.10   | 0.12   |
| 0.87                        | -0.06  | 0.01   | 0.00   | 0.04   | 0.07   | 0.04   | 0.00   | 0.00   | 0.12   | -0.04  | -0.03  |
| 0.92                        | 0.04   | 0.03   | 0.10   | 0.09   | 0.02   | 0.04   | 0.05   | 0.07   | 0.00   | -0.05  | 0.11   |
| 0.97                        | -0.02  | -0.01  | -0.02  | 0.02   | -0.01  | -0.07  | 0.04   | -0.08  | -0.03  | -0.04  | -0.04  |
| 1.02                        | -0.12  | -0.08  | -0.16  | -0.16  | -0.09  | -0.12  | -0.13  | -0.05  | -0.15  | -0.14  | -0.09  |
| 1.07                        | 0.17   | 0.14   | 0.17   | 0.21   | 0.15   | 0.16   | 0.09   | 0.18   | 0.28   | 0.12   | 0.20   |
| 1.12                        | -0.20  | -0.23  | -0.25  | -0.23  | -0.24  | -0.26  | -0.19  | -0.18  | -0.23  | -0.24  | -0.21  |
| 1.17                        | -0.15  | -0.10  | -0.20  | -0.13  | -0.12  | -0.14  | -0.22  | -0.17  | -0.12  | -0.21  | -0.11  |
| 1.22                        | -0.03  | -0.06  | -0.03  | -0.03  | 0.04   | -0.08  | -0.08  | -0.04  | -0.04  | 0.00   | 0.02   |
| 1.27                        | 0.03   | 0.06   | 0.09   | 0.15   | 0.13   | 0.10   | 0.11   | 0.15   | 0.07   | 0.09   | 0.10   |
| 1.32                        | -0.02  | 0.00   | -0.07  | 0.00   | 0.03   | 0.01   | 0.00   | -0.02  | 0.00   | 0.00   | -0.02  |
| 1.37                        | -0.25  | -0.16  | -0.18  | -0.16  | -0.10  | -0.08  | -0.19  | -0.10  | -0.08  | -0.12  | -0.06  |
| 1.42                        | -0.28  | -0.27  | -0.34  | -0.31  | -0.39  | -0.34  | -0.36  | -0.28  | -0.27  | -0.29  | -0.30  |
| 1.47                        | 1.50   | 1.35   | 1.21   | 0.99   | 0.88   | 0.71   | 0.50   | 0.41   | 0.24   | 0.22   | 0.11   |
| 1.52                        | 1.43   | 1.31   | 1.26   | 1.18   | 1.07   | 0.97   | 0.77   | 0.81   | 0.72   | 0.73   | 0.73   |
| 1.57                        | 0.16   | 0.06   | -0.02  | -0.09  | -0.07  | -0.23  | -0.29  | -0.33  | -0.24  | -0.24  | -0.13  |
| 1.62                        | -0.65  | -0.84  | -0.94  | -1.07  | -1.20  | -1.27  | -1.35  | -1.43  | -1.40  | -1.45  | -1.25  |
| 1.67                        | -1.03  | -1.30  | -1.39  | -1.59  | -1.77  | -1.93  | -2.09  | -2.16  | -2.20  | -2.25  | -2.15  |
| 1.72                        | -0.82  | -1.04  | -1.16  | -1.44  | -1.61  | -1.77  | -1.89  | -2.07  | -2.20  | -2.30  | -2.14  |
| 1.77                        | -0.59  | -0.76  | -0.96  | -1.07  | -1.34  | -1.47  | -1.71  | -1.83  | -1.92  | -2.03  | -2.03  |
| 1.82                        | -0.31  | -0.49  | -0.72  | -0.85  | -1.04  | -1.36  | -1.46  | -1.65  | -1.79  | -1.80  | -1.74  |
| 1.87                        | -0.05  | -0.13  | -0.35  | -0.56  | -0.75  | -0.90  | -1.14  | -1.26  | -1.35  | -1.45  | -1.39  |

|      |      |       |       |       |       |       |       |       |       |       |       |
|------|------|-------|-------|-------|-------|-------|-------|-------|-------|-------|-------|
| 1.92 | 0.10 | -0.03 | -0.26 | -0.48 | -0.67 | -0.85 | -1.11 | -1.19 | -1.31 | -1.35 | -1.39 |
| 1.97 | 0.08 | -0.11 | -0.22 | -0.41 | -0.59 | -0.80 | -1.01 | -1.14 | -1.20 | -1.32 | -1.28 |
| 2.02 | 0.41 | 0.24  | -0.02 | -0.17 | -0.31 | -0.43 | -0.65 | -0.72 | -0.82 | -0.88 | -0.87 |
| 2.07 | 0.37 | 0.30  | 0.01  | -0.14 | -0.28 | -0.45 | -0.64 | -0.68 | -0.79 | -0.87 | -0.87 |
| 2.12 | 0.83 | 0.64  | 0.48  | 0.26  | 0.17  | -0.10 | -0.28 | -0.40 | -0.47 | -0.51 | -0.52 |
| 2.17 | 0.92 | 0.81  | 0.63  | 0.47  | 0.31  | 0.05  | -0.07 | -0.17 | -0.27 | -0.29 | -0.27 |
| 2.22 | 0.94 | 0.80  | 0.59  | 0.44  | 0.31  | 0.08  | -0.05 | -0.18 | -0.20 | -0.35 | -0.24 |
| 2.27 | 1.10 | 1.03  | 0.86  | 0.70  | 0.50  | 0.37  | 0.16  | 0.09  | -0.04 | -0.08 | -0.05 |
| 2.32 | 1.17 | 1.08  | 0.87  | 0.69  | 0.57  | 0.37  | 0.24  | 0.16  | 0.02  | 0.07  | 0.05  |
| 2.37 | 1.08 | 1.00  | 0.78  | 0.61  | 0.52  | 0.32  | 0.17  | 0.10  | 0.03  | -0.10 | -0.02 |
| 2.42 | 1.28 | 1.16  | 1.05  | 0.93  | 0.75  | 0.59  | 0.35  | 0.27  | 0.27  | 0.17  | 0.26  |
| 2.47 | 1.24 | 1.17  | 1.00  | 0.84  | 0.70  | 0.48  | 0.40  | 0.27  | 0.16  | 0.19  | 0.20  |
| 2.52 | 1.36 | 1.25  | 1.09  | 0.96  | 0.91  | 0.67  | 0.52  | 0.43  | 0.35  | 0.34  | 0.34  |
| 2.57 | 1.35 | 1.19  | 1.03  | 0.90  | 0.76  | 0.61  | 0.46  | 0.37  | 0.24  | 0.32  | 0.31  |
| 2.62 | 1.75 | 1.60  | 1.49  | 1.31  | 1.19  | 1.01  | 0.83  | 0.82  | 0.72  | 0.64  | 0.71  |
| 2.67 | 1.48 | 1.29  | 1.20  | 1.04  | 0.95  | 0.81  | 0.66  | 0.63  | 0.45  | 0.48  | 0.57  |
| 2.72 | 1.74 | 1.66  | 1.46  | 1.34  | 1.25  | 1.04  | 0.92  | 0.87  | 0.77  | 0.68  | 0.77  |
| 2.77 | 1.93 | 1.78  | 1.71  | 1.59  | 1.41  | 1.26  | 1.11  | 1.10  | 0.96  | 0.91  | 0.97  |
| 2.82 | 1.81 | 1.72  | 1.65  | 1.49  | 1.32  | 1.20  | 0.99  | 1.02  | 0.88  | 0.82  | 0.86  |
| 2.87 | 1.70 | 1.61  | 1.48  | 1.42  | 1.18  | 1.05  | 0.93  | 0.89  | 0.77  | 0.72  | 0.81  |
| 2.92 | 1.86 | 1.75  | 1.60  | 1.45  | 1.32  | 1.26  | 1.01  | 0.94  | 0.93  | 0.87  | 0.91  |
| 2.97 | 1.90 | 1.83  | 1.70  | 1.56  | 1.38  | 1.19  | 1.14  | 1.10  | 0.95  | 0.88  | 1.01  |
| 3.02 | 1.99 | 1.86  | 1.82  | 1.64  | 1.51  | 1.35  | 1.24  | 1.18  | 1.02  | 0.90  | 1.10  |
| 3.07 | 1.97 | 1.82  | 1.69  | 1.66  | 1.53  | 1.36  | 1.17  | 1.11  | 1.00  | 1.01  | 0.96  |
| 3.12 | 2.15 | 2.11  | 1.94  | 1.76  | 1.70  | 1.52  | 1.30  | 1.29  | 1.22  | 1.14  | 1.20  |
| 3.17 | 2.14 | 2.05  | 1.94  | 1.78  | 1.66  | 1.54  | 1.45  | 1.37  | 1.27  | 1.26  | 1.26  |
| 3.22 | 2.19 | 2.15  | 1.98  | 1.87  | 1.80  | 1.56  | 1.42  | 1.30  | 1.30  | 1.23  | 1.29  |
| 3.27 | 2.24 | 2.08  | 2.02  | 1.85  | 1.74  | 1.59  | 1.42  | 1.32  | 1.29  | 1.21  | 1.34  |
| 3.32 | 2.24 | 2.18  | 2.06  | 1.92  | 1.79  | 1.66  | 1.46  | 1.40  | 1.36  | 1.36  | 1.35  |
| 3.37 | 1.92 | 1.88  | 1.75  | 1.71  | 1.59  | 1.40  | 1.24  | 1.19  | 1.09  | 1.01  | 1.16  |
| 3.42 | 2.42 | 2.17  | 2.11  | 2.00  | 1.87  | 1.72  | 1.57  | 1.47  | 1.49  | 1.43  | 1.47  |
| 3.47 | 2.14 | 2.15  | 2.02  | 1.84  | 1.70  | 1.56  | 1.43  | 1.32  | 1.31  | 1.24  | 1.36  |
| 3.52 | 2.26 | 2.08  | 1.97  | 1.88  | 1.72  | 1.60  | 1.40  | 1.36  | 1.28  | 1.24  | 1.22  |
| 3.57 | 2.26 | 2.11  | 2.04  | 1.82  | 1.77  | 1.56  | 1.52  | 1.34  | 1.35  | 1.29  | 1.29  |
| 3.62 | 2.39 | 2.32  | 2.22  | 2.02  | 1.93  | 1.79  | 1.70  | 1.54  | 1.45  | 1.51  | 1.55  |
| 3.67 | 2.17 | 2.10  | 1.97  | 1.84  | 1.72  | 1.60  | 1.48  | 1.35  | 1.32  | 1.24  | 1.29  |
| 3.72 | 2.35 | 2.31  | 2.20  | 1.98  | 1.86  | 1.77  | 1.72  | 1.49  | 1.50  | 1.49  | 1.56  |
| 3.92 | 2.52 | 2.42  | 2.32  | 2.20  | 2.09  | 1.93  | 1.79  | 1.72  | 1.64  | 1.60  | 1.67  |
| 4.12 | 2.57 | 2.46  | 2.31  | 2.25  | 2.04  | 1.90  | 1.74  | 1.73  | 1.66  | 1.69  | 1.70  |
| 4.32 | 2.52 | 2.44  | 2.27  | 2.22  | 2.09  | 1.90  | 1.85  | 1.75  | 1.67  | 1.57  | 1.73  |
| 4.52 | 2.50 | 2.50  | 2.41  | 2.20  | 2.16  | 1.95  | 1.87  | 1.75  | 1.68  | 1.62  | 1.69  |
| 4.72 | 2.57 | 2.50  | 2.43  | 2.26  | 2.13  | 2.00  | 1.85  | 1.72  | 1.71  | 1.69  | 1.74  |
| 4.92 | 2.83 | 2.80  | 2.68  | 2.58  | 2.44  | 2.36  | 2.19  | 2.09  | 1.99  | 1.96  | 1.99  |
| 5.12 | 2.79 | 2.70  | 2.68  | 2.44  | 2.40  | 2.22  | 2.03  | 1.97  | 1.91  | 1.87  | 1.89  |
| 5.32 | 2.93 | 2.87  | 2.82  | 2.71  | 2.51  | 2.34  | 2.19  | 2.16  | 2.06  | 2.09  | 2.12  |
| 5.52 | 3.02 | 2.95  | 2.84  | 2.71  | 2.58  | 2.46  | 2.28  | 2.16  | 2.05  | 2.05  | 2.17  |
| 5.72 | 3.03 | 2.98  | 2.87  | 2.75  | 2.61  | 2.49  | 2.30  | 2.18  | 2.16  | 2.10  | 2.19  |
| 5.92 | 2.83 | 2.72  | 2.65  | 2.51  | 2.37  | 2.26  | 2.03  | 2.01  | 1.94  | 1.89  | 1.94  |
| 6.12 | 2.96 | 2.94  | 2.74  | 2.68  | 2.53  | 2.40  | 2.28  | 2.23  | 2.08  | 2.01  | 2.05  |
| 6.32 | 2.76 | 2.68  | 2.62  | 2.43  | 2.24  | 2.22  | 2.00  | 1.92  | 1.82  | 1.80  | 1.82  |

|       |      |      |      |      |      |      |      |      |      |      |      |
|-------|------|------|------|------|------|------|------|------|------|------|------|
| 6.52  | 2.99 | 2.95 | 2.84 | 2.66 | 2.56 | 2.36 | 2.29 | 2.21 | 2.08 | 2.05 | 1.99 |
| 6.72  | 3.21 | 3.13 | 2.98 | 2.92 | 2.78 | 2.56 | 2.41 | 2.39 | 2.23 | 2.15 | 2.18 |
| 6.92  | 2.95 | 2.88 | 2.70 | 2.56 | 2.44 | 2.25 | 2.13 | 2.13 | 2.04 | 1.94 | 1.99 |
| 7.12  | 2.94 | 2.96 | 2.82 | 2.65 | 2.57 | 2.29 | 2.26 | 2.17 | 2.06 | 1.93 | 2.01 |
| 7.32  | 3.02 | 2.99 | 2.85 | 2.75 | 2.65 | 2.43 | 2.31 | 2.14 | 2.05 | 1.94 | 2.07 |
| 7.52  | 3.00 | 2.91 | 2.83 | 2.70 | 2.53 | 2.37 | 2.19 | 2.19 | 2.09 | 2.02 | 2.06 |
| 7.72  | 3.05 | 3.05 | 2.92 | 2.74 | 2.59 | 2.36 | 2.29 | 2.12 | 2.09 | 2.00 | 2.06 |
| 7.92  | 3.05 | 2.99 | 2.89 | 2.70 | 2.61 | 2.38 | 2.31 | 2.14 | 2.05 | 2.00 | 2.08 |
| 8.12  | 3.15 | 3.14 | 2.95 | 2.85 | 2.66 | 2.59 | 2.35 | 2.27 | 2.21 | 2.12 | 2.15 |
| 8.32  | 3.16 | 3.08 | 3.00 | 2.87 | 2.66 | 2.55 | 2.37 | 2.27 | 2.17 | 2.10 | 2.14 |
| 8.52  | 2.93 | 2.84 | 2.81 | 2.67 | 2.52 | 2.32 | 2.16 | 2.13 | 2.01 | 1.93 | 1.95 |
| 8.72  | 2.99 | 2.96 | 2.84 | 2.75 | 2.54 | 2.37 | 2.25 | 2.09 | 1.96 | 1.94 | 1.97 |
| 8.92  | 2.99 | 2.92 | 2.74 | 2.57 | 2.46 | 2.29 | 2.12 | 2.01 | 1.84 | 1.80 | 1.85 |
| 9.12  | 3.09 | 3.11 | 2.94 | 2.85 | 2.64 | 2.51 | 2.27 | 2.19 | 2.14 | 2.02 | 2.11 |
| 9.32  | 2.96 | 2.95 | 2.81 | 2.67 | 2.45 | 2.21 | 2.11 | 2.01 | 1.95 | 1.87 | 1.90 |
| 9.52  | 3.11 | 3.05 | 2.96 | 2.86 | 2.64 | 2.44 | 2.27 | 2.22 | 2.03 | 1.96 | 2.07 |
| 9.72  | 3.12 | 3.05 | 2.84 | 2.69 | 2.60 | 2.42 | 2.14 | 2.17 | 2.07 | 2.01 | 1.93 |
| 9.92  | 3.32 | 3.23 | 3.07 | 2.91 | 2.75 | 2.60 | 2.43 | 2.33 | 2.21 | 2.13 | 2.13 |
| 10.12 | 3.22 | 3.12 | 2.91 | 2.82 | 2.72 | 2.48 | 2.30 | 2.23 | 2.09 | 2.00 | 2.10 |
| 10.32 | 2.97 | 2.90 | 2.82 | 2.64 | 2.45 | 2.27 | 2.09 | 2.01 | 1.91 | 1.84 | 1.83 |
| 10.52 | 3.10 | 2.98 | 2.89 | 2.70 | 2.57 | 2.37 | 2.23 | 2.13 | 1.99 | 1.86 | 1.88 |
| 10.72 | 3.28 | 3.24 | 2.98 | 2.87 | 2.72 | 2.52 | 2.29 | 2.24 | 2.13 | 2.12 | 2.11 |
| 10.92 | 3.08 | 3.08 | 2.90 | 2.79 | 2.62 | 2.41 | 2.28 | 2.09 | 2.03 | 1.95 | 2.04 |
| 11.12 | 3.08 | 3.00 | 2.85 | 2.72 | 2.63 | 2.48 | 2.26 | 2.14 | 2.04 | 1.92 | 1.85 |
| 11.32 | 3.34 | 3.25 | 3.12 | 3.00 | 2.76 | 2.58 | 2.43 | 2.28 | 2.12 | 2.16 | 2.18 |
| 11.52 | 3.00 | 2.98 | 2.86 | 2.67 | 2.59 | 2.38 | 2.22 | 2.10 | 1.96 | 1.89 | 1.92 |
| 11.72 | 3.20 | 3.00 | 2.93 | 2.83 | 2.68 | 2.48 | 2.36 | 2.15 | 2.03 | 1.89 | 1.93 |
| 11.92 | 3.02 | 2.93 | 2.76 | 2.62 | 2.48 | 2.31 | 2.05 | 1.93 | 1.91 | 1.78 | 1.80 |
| 12.12 | 3.17 | 3.13 | 2.95 | 2.86 | 2.60 | 2.40 | 2.23 | 2.16 | 1.95 | 1.94 | 1.96 |
| 12.32 | 3.30 | 3.14 | 2.96 | 2.80 | 2.66 | 2.44 | 2.30 | 2.22 | 2.03 | 1.98 | 1.96 |
| 12.52 | 3.05 | 2.97 | 2.84 | 2.73 | 2.50 | 2.32 | 2.09 | 2.09 | 1.91 | 1.92 | 1.89 |
| 12.72 | 3.33 | 3.37 | 3.08 | 2.94 | 2.84 | 2.58 | 2.44 | 2.29 | 2.17 | 2.15 | 2.13 |
| 12.92 | 3.22 | 3.19 | 3.07 | 2.94 | 2.70 | 2.52 | 2.34 | 2.25 | 2.07 | 2.03 | 2.04 |
| 13.12 | 3.06 | 2.91 | 2.77 | 2.63 | 2.41 | 2.26 | 2.12 | 2.11 | 1.87 | 1.79 | 1.82 |
| 13.32 | 3.17 | 3.09 | 2.85 | 2.73 | 2.53 | 2.42 | 2.16 | 2.11 | 1.93 | 1.90 | 1.87 |
| 13.52 | 3.09 | 3.03 | 2.89 | 2.76 | 2.61 | 2.36 | 2.27 | 2.04 | 2.01 | 1.86 | 1.87 |
| 13.72 | 3.37 | 3.29 | 3.12 | 3.02 | 2.85 | 2.62 | 2.46 | 2.35 | 2.17 | 2.05 | 2.09 |
| 13.92 | 3.10 | 2.97 | 2.88 | 2.72 | 2.56 | 2.36 | 2.21 | 2.05 | 1.94 | 1.80 | 1.86 |
| 14.00 | 3.38 | 3.28 | 3.21 | 2.96 | 2.76 | 2.60 | 2.40 | 2.32 | 2.13 | 2.07 | 2.08 |
| 14.08 | 3.18 | 3.13 | 2.98 | 2.81 | 2.67 | 2.54 | 2.26 | 2.14 | 2.05 | 2.03 | 1.91 |
| 14.17 | 3.11 | 3.08 | 2.87 | 2.77 | 2.55 | 2.37 | 2.12 | 2.04 | 1.93 | 1.88 | 1.87 |
| 14.27 | 3.11 | 2.93 | 2.83 | 2.72 | 2.51 | 2.35 | 2.15 | 1.99 | 1.88 | 1.77 | 1.86 |
| 14.38 | 3.13 | 3.09 | 3.01 | 2.88 | 2.63 | 2.42 | 2.27 | 2.13 | 2.02 | 1.91 | 1.96 |
| 14.49 | 3.05 | 3.08 | 2.85 | 2.72 | 2.53 | 2.29 | 2.13 | 2.01 | 1.92 | 1.82 | 1.85 |
| 14.61 | 3.05 | 2.98 | 2.89 | 2.66 | 2.47 | 2.28 | 2.13 | 2.01 | 1.82 | 1.79 | 1.82 |
| 14.75 | 3.01 | 2.93 | 2.75 | 2.57 | 2.43 | 2.27 | 2.06 | 2.03 | 1.85 | 1.75 | 1.78 |
| 14.89 | 3.65 | 3.59 | 3.39 | 3.30 | 3.06 | 2.85 | 2.61 | 2.57 | 2.39 | 2.19 | 2.34 |
| 15.05 | 3.17 | 3.05 | 2.83 | 2.74 | 2.59 | 2.42 | 2.12 | 2.00 | 1.86 | 1.81 | 1.82 |
| 15.21 | 3.26 | 3.22 | 3.08 | 2.92 | 2.70 | 2.53 | 2.30 | 2.18 | 2.05 | 1.96 | 1.95 |
| 15.39 | 3.21 | 3.06 | 2.94 | 2.81 | 2.70 | 2.47 | 2.22 | 2.11 | 1.99 | 1.91 | 2.02 |



|        |      |      |      |      |      |      |      |      |      |      |      |
|--------|------|------|------|------|------|------|------|------|------|------|------|
| 15.59  | 3.14 | 3.03 | 2.84 | 2.74 | 2.57 | 2.32 | 2.26 | 2.06 | 1.93 | 1.80 | 1.77 |
| 15.80  | 3.33 | 3.23 | 3.11 | 2.92 | 2.72 | 2.55 | 2.29 | 2.22 | 1.99 | 2.01 | 1.98 |
| 16.02  | 3.15 | 3.05 | 2.90 | 2.80 | 2.61 | 2.38 | 2.23 | 2.04 | 1.95 | 1.88 | 1.95 |
| 16.27  | 3.34 | 3.37 | 3.07 | 3.06 | 2.80 | 2.71 | 2.40 | 2.23 | 2.13 | 2.07 | 2.11 |
| 16.53  | 3.11 | 2.98 | 2.87 | 2.72 | 2.52 | 2.37 | 2.23 | 2.07 | 1.86 | 1.76 | 1.79 |
| 16.81  | 3.05 | 2.95 | 2.78 | 2.64 | 2.46 | 2.24 | 2.01 | 1.94 | 1.83 | 1.67 | 1.66 |
| 17.12  | 3.21 | 3.17 | 3.05 | 2.87 | 2.69 | 2.52 | 2.21 | 2.20 | 2.08 | 1.93 | 1.95 |
| 17.45  | 3.05 | 2.98 | 2.81 | 2.68 | 2.47 | 2.25 | 2.01 | 1.93 | 1.76 | 1.73 | 1.84 |
| 17.81  | 3.33 | 3.28 | 3.09 | 2.91 | 2.80 | 2.56 | 2.33 | 2.24 | 2.04 | 2.04 | 2.02 |
| 18.19  | 3.37 | 3.31 | 3.15 | 2.94 | 2.78 | 2.50 | 2.28 | 2.22 | 2.09 | 1.97 | 1.91 |
| 18.60  | 3.31 | 3.21 | 3.12 | 2.91 | 2.74 | 2.51 | 2.37 | 2.21 | 1.99 | 1.91 | 1.95 |
| 19.05  | 3.31 | 3.33 | 3.08 | 2.92 | 2.76 | 2.48 | 2.31 | 2.20 | 2.06 | 1.92 | 1.95 |
| 19.53  | 3.11 | 2.99 | 2.86 | 2.65 | 2.49 | 2.30 | 2.08 | 1.90 | 1.87 | 1.74 | 1.77 |
| 20.05  | 3.16 | 3.14 | 2.97 | 2.71 | 2.58 | 2.32 | 2.14 | 1.98 | 1.88 | 1.79 | 1.68 |
| 20.61  | 3.22 | 3.13 | 3.05 | 2.87 | 2.63 | 2.45 | 2.28 | 2.07 | 1.93 | 1.90 | 1.89 |
| 21.22  | 3.27 | 3.16 | 2.95 | 2.82 | 2.68 | 2.39 | 2.22 | 2.10 | 1.91 | 1.79 | 1.82 |
| 21.87  | 3.11 | 3.10 | 2.97 | 2.80 | 2.58 | 2.42 | 2.20 | 2.02 | 1.85 | 1.82 | 1.83 |
| 22.57  | 3.31 | 3.16 | 3.01 | 2.86 | 2.64 | 2.38 | 2.17 | 2.05 | 1.90 | 1.82 | 1.84 |
| 23.33  | 3.26 | 3.14 | 3.02 | 2.89 | 2.61 | 2.40 | 2.19 | 2.03 | 1.92 | 1.80 | 1.79 |
| 24.15  | 3.15 | 3.10 | 3.01 | 2.76 | 2.64 | 2.37 | 2.12 | 2.05 | 1.88 | 1.83 | 1.82 |
| 25.03  | 3.13 | 2.99 | 2.85 | 2.61 | 2.50 | 2.34 | 2.07 | 1.91 | 1.76 | 1.65 | 1.74 |
| 25.98  | 3.28 | 3.24 | 3.04 | 2.89 | 2.72 | 2.44 | 2.24 | 2.10 | 1.92 | 1.83 | 1.85 |
| 27.01  | 3.11 | 3.03 | 2.78 | 2.70 | 2.49 | 2.20 | 2.05 | 1.94 | 1.81 | 1.64 | 1.69 |
| 28.11  | 3.36 | 3.20 | 3.07 | 2.85 | 2.62 | 2.45 | 2.25 | 2.06 | 1.93 | 1.88 | 1.91 |
| 29.30  | 3.19 | 3.15 | 2.92 | 2.77 | 2.57 | 2.37 | 2.10 | 2.05 | 1.87 | 1.75 | 1.66 |
| 30.59  | 3.25 | 3.13 | 2.88 | 2.83 | 2.65 | 2.41 | 2.15 | 2.05 | 1.85 | 1.85 | 1.76 |
| 31.98  | 2.93 | 2.88 | 2.72 | 2.57 | 2.37 | 2.09 | 1.90 | 1.75 | 1.65 | 1.54 | 1.53 |
| 33.47  | 3.09 | 2.99 | 2.87 | 2.70 | 2.47 | 2.23 | 2.09 | 1.87 | 1.74 | 1.65 | 1.62 |
| 35.09  | 3.11 | 2.99 | 2.82 | 2.70 | 2.42 | 2.21 | 2.00 | 1.92 | 1.67 | 1.55 | 1.56 |
| 36.83  | 3.09 | 2.96 | 2.71 | 2.59 | 2.39 | 2.09 | 1.97 | 1.82 | 1.68 | 1.62 | 1.64 |
| 38.71  | 3.13 | 3.04 | 2.88 | 2.70 | 2.53 | 2.24 | 2.05 | 1.87 | 1.81 | 1.66 | 1.63 |
| 40.73  | 3.16 | 3.07 | 2.97 | 2.71 | 2.50 | 2.28 | 2.14 | 1.93 | 1.82 | 1.76 | 1.79 |
| 42.92  | 3.06 | 2.99 | 2.79 | 2.66 | 2.34 | 2.20 | 2.05 | 1.78 | 1.66 | 1.60 | 1.56 |
| 45.27  | 3.04 | 2.90 | 2.79 | 2.55 | 2.36 | 2.17 | 1.98 | 1.80 | 1.61 | 1.58 | 1.58 |
| 47.81  | 3.14 | 3.04 | 2.96 | 2.72 | 2.48 | 2.25 | 1.95 | 1.85 | 1.73 | 1.63 | 1.56 |
| 50.55  | 2.77 | 2.65 | 2.48 | 2.29 | 2.08 | 1.86 | 1.55 | 1.39 | 1.35 | 1.30 | 1.27 |
| 53.51  | 3.14 | 3.06 | 2.90 | 2.74 | 2.47 | 2.32 | 2.08 | 1.83 | 1.73 | 1.64 | 1.65 |
| 56.69  | 2.92 | 2.87 | 2.64 | 2.55 | 2.28 | 2.04 | 1.83 | 1.68 | 1.46 | 1.43 | 1.44 |
| 60.13  | 2.95 | 2.81 | 2.63 | 2.41 | 2.27 | 2.03 | 1.72 | 1.61 | 1.51 | 1.38 | 1.38 |
| 63.84  | 3.05 | 2.92 | 2.77 | 2.57 | 2.31 | 2.10 | 1.91 | 1.76 | 1.59 | 1.51 | 1.48 |
| 67.83  | 2.86 | 2.77 | 2.54 | 2.36 | 2.16 | 1.97 | 1.69 | 1.54 | 1.38 | 1.31 | 1.25 |
| 72.15  | 2.83 | 2.71 | 2.52 | 2.38 | 2.17 | 1.88 | 1.74 | 1.57 | 1.41 | 1.29 | 1.35 |
| 76.80  | 2.69 | 2.60 | 2.42 | 2.28 | 2.08 | 1.84 | 1.62 | 1.52 | 1.34 | 1.23 | 1.27 |
| 81.81  | 3.02 | 2.91 | 2.82 | 2.57 | 2.26 | 2.19 | 1.91 | 1.73 | 1.53 | 1.54 | 1.51 |
| 87.22  | 2.82 | 2.74 | 2.59 | 2.37 | 2.19 | 1.98 | 1.72 | 1.60 | 1.46 | 1.29 | 1.37 |
| 93.06  | 2.77 | 2.65 | 2.44 | 2.34 | 2.09 | 1.84 | 1.70 | 1.52 | 1.30 | 1.27 | 1.27 |
| 99.35  | 2.86 | 2.78 | 2.61 | 2.41 | 2.18 | 1.92 | 1.81 | 1.61 | 1.46 | 1.35 | 1.35 |
| 106.13 | 2.79 | 2.56 | 2.42 | 2.23 | 2.02 | 1.82 | 1.65 | 1.46 | 1.32 | 1.22 | 1.28 |
| 113.45 | 2.99 | 2.84 | 2.71 | 2.42 | 2.23 | 2.01 | 1.76 | 1.67 | 1.52 | 1.35 | 1.42 |
| 121.34 | 2.67 | 2.62 | 2.38 | 2.23 | 2.01 | 1.78 | 1.58 | 1.31 | 1.28 | 1.09 | 1.16 |

|         |      |      |      |      |      |      |      |      |      |      |      |
|---------|------|------|------|------|------|------|------|------|------|------|------|
| 129.86  | 2.64 | 2.51 | 2.34 | 2.13 | 1.89 | 1.73 | 1.49 | 1.35 | 1.22 | 1.09 | 1.06 |
| 139.04  | 2.64 | 2.55 | 2.45 | 2.23 | 1.95 | 1.73 | 1.64 | 1.40 | 1.22 | 1.17 | 1.23 |
| 148.94  | 2.52 | 2.43 | 2.16 | 2.03 | 1.75 | 1.55 | 1.35 | 1.15 | 1.02 | 0.97 | 0.95 |
| 159.62  | 2.81 | 2.58 | 2.46 | 2.25 | 2.04 | 1.76 | 1.57 | 1.40 | 1.27 | 1.13 | 1.24 |
| 171.14  | 2.66 | 2.55 | 2.38 | 2.22 | 1.97 | 1.76 | 1.56 | 1.46 | 1.23 | 1.18 | 1.14 |
| 183.56  | 2.36 | 2.22 | 2.07 | 1.90 | 1.69 | 1.46 | 1.17 | 1.07 | 0.96 | 0.84 | 0.87 |
| 196.96  | 2.60 | 2.53 | 2.32 | 2.14 | 1.95 | 1.61 | 1.51 | 1.33 | 1.17 | 1.05 | 1.05 |
| 211.41  | 2.69 | 2.55 | 2.38 | 2.13 | 1.98 | 1.77 | 1.47 | 1.33 | 1.17 | 1.13 | 1.10 |
| 226.99  | 2.57 | 2.53 | 2.29 | 2.13 | 1.85 | 1.61 | 1.41 | 1.21 | 1.10 | 0.96 | 1.08 |
| 243.80  | 2.38 | 2.27 | 2.12 | 1.88 | 1.66 | 1.45 | 1.31 | 1.18 | 1.00 | 0.91 | 0.91 |
| 261.93  | 2.61 | 2.57 | 2.40 | 2.12 | 1.98 | 1.73 | 1.45 | 1.28 | 1.17 | 1.02 | 1.08 |
| 281.48  | 2.52 | 2.39 | 2.20 | 1.97 | 1.76 | 1.59 | 1.30 | 1.19 | 1.05 | 1.01 | 0.93 |
| 302.56  | 2.47 | 2.39 | 2.21 | 2.00 | 1.77 | 1.62 | 1.35 | 1.21 | 1.05 | 1.03 | 0.99 |
| 325.30  | 2.63 | 2.57 | 2.43 | 2.16 | 1.93 | 1.66 | 1.54 | 1.33 | 1.15 | 1.11 | 1.11 |
| 349.83  | 2.48 | 2.35 | 2.20 | 2.04 | 1.83 | 1.62 | 1.34 | 1.14 | 1.05 | 0.93 | 0.99 |
| 376.28  | 2.54 | 2.39 | 2.21 | 2.08 | 1.78 | 1.62 | 1.29 | 1.15 | 1.07 | 1.00 | 1.05 |
| 404.81  | 2.66 | 2.54 | 2.41 | 2.23 | 1.97 | 1.74 | 1.56 | 1.46 | 1.29 | 1.24 | 1.26 |
| 435.58  | 2.52 | 2.42 | 2.24 | 2.04 | 1.79 | 1.57 | 1.29 | 1.24 | 1.11 | 1.00 | 1.05 |
| 468.76  | 2.55 | 2.46 | 2.31 | 2.14 | 1.88 | 1.71 | 1.46 | 1.30 | 1.15 | 1.11 | 1.09 |
| 504.55  | 2.52 | 2.41 | 2.15 | 1.96 | 1.78 | 1.59 | 1.36 | 1.18 | 1.09 | 1.01 | 1.05 |
| 543.15  | 2.57 | 2.40 | 2.22 | 2.02 | 1.87 | 1.61 | 1.40 | 1.27 | 1.16 | 1.02 | 1.06 |
| 584.78  | 2.47 | 2.35 | 2.12 | 1.98 | 1.83 | 1.55 | 1.36 | 1.27 | 1.07 | 1.04 | 1.08 |
| 629.68  | 2.53 | 2.45 | 2.20 | 2.06 | 1.92 | 1.70 | 1.45 | 1.34 | 1.28 | 1.17 | 1.17 |
| 678.10  | 2.49 | 2.40 | 2.24 | 2.08 | 1.84 | 1.60 | 1.39 | 1.20 | 1.16 | 1.06 | 1.13 |
| 730.33  | 2.81 | 2.68 | 2.46 | 2.31 | 2.07 | 1.86 | 1.68 | 1.48 | 1.44 | 1.27 | 1.37 |
| 786.65  | 2.79 | 2.65 | 2.42 | 2.25 | 2.11 | 1.79 | 1.56 | 1.48 | 1.45 | 1.34 | 1.36 |
| 847.40  | 2.58 | 2.50 | 2.33 | 2.14 | 1.90 | 1.70 | 1.49 | 1.37 | 1.29 | 1.21 | 1.29 |
| 912.92  | 2.75 | 2.60 | 2.52 | 2.26 | 2.09 | 1.86 | 1.64 | 1.50 | 1.46 | 1.32 | 1.44 |
| 983.58  | 2.73 | 2.55 | 2.39 | 2.27 | 2.00 | 1.80 | 1.52 | 1.43 | 1.43 | 1.26 | 1.36 |
| 1059.78 | 2.72 | 2.78 | 2.49 | 2.31 | 2.12 | 1.95 | 1.70 | 1.66 | 1.47 | 1.43 | 1.52 |
| 1141.98 | 2.70 | 2.64 | 2.45 | 2.26 | 2.05 | 1.80 | 1.71 | 1.58 | 1.38 | 1.37 | 1.43 |
| 1230.62 | 2.66 | 2.53 | 2.38 | 2.19 | 2.01 | 1.76 | 1.59 | 1.48 | 1.34 | 1.34 | 1.44 |
| 1326.23 | 2.87 | 2.77 | 2.50 | 2.36 | 2.14 | 1.93 | 1.78 | 1.69 | 1.50 | 1.48 | 1.61 |
| 1429.34 | 3.00 | 2.84 | 2.70 | 2.52 | 2.32 | 2.11 | 1.98 | 1.82 | 1.68 | 1.67 | 1.75 |
| 1540.54 | 2.98 | 2.95 | 2.67 | 2.53 | 2.33 | 2.07 | 1.94 | 1.85 | 1.71 | 1.71 | 1.75 |
| 1660.48 | 2.92 | 2.83 | 2.62 | 2.53 | 2.33 | 2.09 | 1.81 | 1.71 | 1.67 | 1.67 | 1.69 |
| 1789.83 | 3.00 | 2.84 | 2.67 | 2.44 | 2.24 | 2.10 | 1.89 | 1.77 | 1.67 | 1.62 | 1.72 |
| 1929.34 | 3.14 | 2.95 | 2.84 | 2.61 | 2.42 | 2.27 | 2.01 | 1.94 | 1.91 | 1.89 | 1.97 |
| 2079.80 | 3.04 | 2.95 | 2.83 | 2.60 | 2.52 | 2.21 | 2.11 | 1.99 | 1.88 | 1.91 | 1.98 |
| 2242.08 | 3.11 | 2.94 | 2.77 | 2.60 | 2.45 | 2.29 | 2.02 | 2.00 | 1.88 | 1.79 | 1.96 |
| 2417.10 | 3.08 | 3.03 | 2.83 | 2.64 | 2.44 | 2.36 | 2.08 | 2.02 | 1.93 | 1.93 | 1.98 |
| 2605.85 | 3.14 | 3.02 | 2.89 | 2.70 | 2.48 | 2.33 | 2.09 | 2.09 | 2.00 | 1.98 | 2.06 |
| 2809.43 | 2.87 | 2.82 | 2.66 | 2.57 | 2.34 | 2.10 | 1.99 | 1.91 | 1.86 | 1.88 | 1.98 |
| 3028.99 | 2.97 | 2.98 | 2.75 | 2.55 | 2.38 | 2.21 | 2.06 | 1.94 | 1.92 | 1.84 | 1.98 |
| 3265.79 | 3.13 | 3.02 | 2.83 | 2.65 | 2.57 | 2.39 | 2.21 | 2.14 | 2.03 | 1.99 | 2.12 |
| 3521.18 | 3.06 | 3.01 | 2.91 | 2.61 | 2.53 | 2.39 | 2.17 | 2.14 | 2.00 | 2.02 | 2.03 |
| 3796.62 | 2.80 | 2.76 | 2.52 | 2.43 | 2.29 | 2.11 | 1.92 | 1.86 | 1.74 | 1.78 | 1.88 |

| Wavelength<br>(nm)<br>Time<br>(ps) | 537.62 | 539.03 | 540.44 | 541.85 | 543.25 | 544.66 | 546.07 | 547.48 | 548.89 | 550.30 | 551.71 |
|------------------------------------|--------|--------|--------|--------|--------|--------|--------|--------|--------|--------|--------|
| -3.28                              | -0.14  | -0.13  | -0.08  | -0.12  | -0.10  | -0.07  | -0.04  | -0.06  | -0.14  | -0.14  | -0.09  |
| -2.78                              | -0.15  | -0.12  | -0.07  | -0.10  | -0.07  | -0.10  | -0.14  | -0.09  | -0.08  | -0.06  | -0.07  |
| -2.28                              | 0.00   | -0.02  | -0.01  | -0.14  | -0.04  | -0.04  | -0.05  | -0.02  | 0.00   | -0.03  | -0.04  |
| -1.78                              | 0.27   | 0.23   | 0.24   | 0.24   | 0.23   | 0.21   | 0.24   | 0.24   | 0.23   | 0.20   | 0.18   |
| -1.28                              | 0.03   | 0.02   | -0.01  | 0.02   | -0.07  | -0.05  | -0.03  | 0.03   | -0.03  | 0.03   | -0.01  |
| -0.78                              | -0.07  | -0.10  | -0.14  | -0.12  | -0.08  | -0.09  | -0.11  | -0.14  | -0.12  | -0.15  | -0.16  |
| -0.28                              | 0.04   | 0.08   | 0.04   | 0.09   | 0.04   | 0.06   | 0.09   | 0.06   | 0.07   | 0.05   | 0.06   |
| 0.22                               | 0.06   | 0.14   | 0.07   | 0.14   | 0.08   | 0.12   | 0.10   | 0.06   | 0.10   | 0.12   | 0.11   |
| 0.32                               | -0.14  | -0.11  | -0.07  | -0.14  | -0.06  | -0.11  | -0.08  | -0.08  | -0.06  | -0.07  | -0.09  |
| 0.42                               | 0.09   | 0.01   | 0.04   | 0.14   | 0.06   | 0.08   | 0.02   | -0.01  | 0.04   | 0.05   | 0.09   |
| 0.52                               | -0.04  | -0.05  | -0.09  | 0.01   | -0.05  | -0.08  | -0.02  | -0.07  | -0.07  | -0.09  | -0.04  |
| 0.62                               | 0.07   | 0.01   | 0.02   | 0.08   | 0.07   | 0.00   | -0.05  | 0.00   | 0.09   | 0.05   | 0.02   |
| 0.72                               | 0.27   | 0.18   | 0.19   | 0.18   | 0.18   | 0.13   | 0.11   | 0.21   | 0.12   | 0.15   | 0.19   |
| 0.77                               | 0.09   | 0.01   | -0.02  | 0.02   | 0.04   | 0.09   | 0.08   | 0.07   | 0.03   | 0.03   | 0.05   |
| 0.82                               | 0.04   | 0.07   | 0.04   | 0.08   | 0.11   | 0.01   | -0.03  | 0.02   | 0.06   | 0.07   | 0.07   |
| 0.87                               | 0.07   | -0.02  | 0.03   | 0.07   | 0.08   | 0.02   | -0.01  | 0.02   | 0.00   | 0.02   | 0.01   |
| 0.92                               | 0.05   | 0.03   | -0.02  | -0.01  | 0.02   | 0.04   | -0.01  | 0.01   | -0.04  | -0.06  | -0.04  |
| 0.97                               | -0.01  | 0.01   | -0.02  | 0.05   | -0.02  | -0.03  | -0.02  | -0.02  | -0.03  | 0.03   | 0.00   |
| 1.02                               | -0.12  | -0.08  | -0.11  | -0.11  | -0.07  | -0.09  | -0.15  | -0.13  | -0.11  | -0.10  | -0.14  |
| 1.07                               | 0.15   | 0.19   | 0.12   | 0.16   | 0.20   | 0.13   | 0.16   | 0.11   | 0.12   | 0.14   | 0.15   |
| 1.12                               | -0.22  | -0.26  | -0.28  | -0.20  | -0.16  | -0.21  | -0.24  | -0.21  | -0.31  | -0.20  | -0.15  |
| 1.17                               | -0.14  | -0.16  | -0.19  | -0.08  | -0.12  | -0.13  | -0.09  | -0.11  | -0.15  | -0.16  | -0.14  |
| 1.22                               | -0.07  | -0.01  | -0.11  | -0.04  | -0.08  | -0.04  | -0.04  | -0.09  | -0.07  | -0.07  | -0.07  |
| 1.27                               | 0.18   | 0.06   | 0.09   | 0.12   | 0.14   | 0.11   | 0.08   | 0.11   | 0.11   | 0.09   | 0.12   |
| 1.32                               | 0.04   | -0.02  | -0.04  | 0.00   | 0.06   | 0.03   | -0.01  | -0.04  | 0.04   | -0.01  | 0.05   |
| 1.37                               | -0.05  | -0.10  | -0.16  | -0.06  | -0.03  | -0.03  | -0.11  | -0.08  | -0.06  | -0.07  | -0.08  |
| 1.42                               | -0.20  | -0.24  | -0.22  | -0.22  | -0.17  | -0.20  | -0.21  | -0.16  | -0.19  | -0.11  | -0.17  |
| 1.47                               | 0.21   | 0.14   | 0.12   | 0.13   | 0.07   | 0.04   | -0.01  | -0.02  | -0.01  | -0.01  | -0.05  |
| 1.52                               | 0.79   | 0.86   | 1.03   | 1.18   | 1.34   | 1.51   | 1.67   | 1.76   | 1.84   | 1.94   | 1.96   |
| 1.57                               | 0.10   | 0.31   | 0.71   | 1.09   | 1.55   | 1.94   | 2.38   | 2.93   | 3.39   | 3.80   | 4.20   |
| 1.62                               | -1.00  | -0.76  | -0.36  | 0.03   | 0.50   | 1.12   | 1.69   | 2.30   | 2.92   | 3.63   | 4.28   |
| 1.67                               | -1.92  | -1.73  | -1.42  | -1.02  | -0.51  | -0.01  | 0.54   | 1.23   | 1.86   | 2.59   | 3.30   |
| 1.72                               | -2.01  | -1.86  | -1.59  | -1.20  | -0.77  | -0.31  | 0.22   | 0.86   | 1.37   | 2.00   | 2.66   |
| 1.77                               | -1.88  | -1.74  | -1.51  | -1.14  | -0.83  | -0.38  | 0.08   | 0.61   | 1.21   | 1.83   | 2.34   |
| 1.82                               | -1.72  | -1.57  | -1.42  | -1.05  | -0.73  | -0.39  | 0.07   | 0.56   | 1.01   | 1.62   | 2.12   |
| 1.87                               | -1.32  | -1.24  | -1.02  | -0.77  | -0.42  | -0.11  | 0.28   | 0.73   | 1.23   | 1.79   | 2.26   |
| 1.92                               | -1.25  | -1.23  | -0.94  | -0.80  | -0.39  | -0.04  | 0.35   | 0.83   | 1.31   | 1.85   | 2.31   |
| 1.97                               | -1.16  | -1.05  | -0.87  | -0.55  | -0.25  | 0.09   | 0.56   | 0.96   | 1.51   | 1.95   | 2.50   |
| 2.02                               | -0.80  | -0.63  | -0.44  | -0.12  | 0.14   | 0.51   | 0.92   | 1.42   | 1.92   | 2.38   | 2.88   |
| 2.07                               | -0.72  | -0.65  | -0.44  | -0.08  | 0.25   | 0.60   | 1.03   | 1.49   | 1.92   | 2.40   | 2.85   |
| 2.12                               | -0.34  | -0.24  | -0.02  | 0.28   | 0.58   | 1.03   | 1.42   | 1.90   | 2.42   | 2.89   | 3.43   |
| 2.17                               | -0.14  | -0.01  | 0.23   | 0.44   | 0.79   | 1.18   | 1.60   | 2.08   | 2.51   | 2.98   | 3.50   |
| 2.22                               | -0.20  | -0.03  | 0.16   | 0.46   | 0.79   | 1.19   | 1.56   | 1.96   | 2.41   | 2.88   | 3.41   |
| 2.27                               | 0.08   | 0.17   | 0.42   | 0.66   | 1.02   | 1.36   | 1.77   | 2.19   | 2.67   | 3.16   | 3.63   |
| 2.32                               | 0.12   | 0.25   | 0.43   | 0.74   | 1.14   | 1.45   | 1.83   | 2.30   | 2.76   | 3.30   | 3.67   |
| 2.37                               | 0.09   | 0.30   | 0.45   | 0.79   | 1.14   | 1.60   | 1.90   | 2.45   | 2.86   | 3.33   | 3.79   |
| 2.42                               | 0.38   | 0.43   | 0.72   | 1.04   | 1.34   | 1.68   | 2.12   | 2.60   | 3.12   | 3.59   | 4.02   |

|      |      |      |      |      |      |      |      |      |      |      |      |
|------|------|------|------|------|------|------|------|------|------|------|------|
| 2.47 | 0.31 | 0.41 | 0.64 | 0.98 | 1.26 | 1.63 | 2.06 | 2.53 | 2.94 | 3.43 | 3.89 |
| 2.52 | 0.48 | 0.60 | 0.80 | 1.10 | 1.45 | 1.81 | 2.28 | 2.72 | 3.15 | 3.65 | 4.07 |
| 2.57 | 0.39 | 0.53 | 0.76 | 1.01 | 1.37 | 1.78 | 2.16 | 2.59 | 3.11 | 3.48 | 3.95 |
| 2.62 | 0.83 | 0.94 | 1.21 | 1.44 | 1.82 | 2.22 | 2.59 | 3.00 | 3.45 | 3.92 | 4.40 |
| 2.67 | 0.60 | 0.76 | 0.98 | 1.21 | 1.59 | 1.86 | 2.32 | 2.77 | 3.18 | 3.62 | 4.01 |
| 2.72 | 0.87 | 1.03 | 1.28 | 1.61 | 1.89 | 2.30 | 2.63 | 3.09 | 3.52 | 4.02 | 4.45 |
| 2.77 | 1.04 | 1.20 | 1.42 | 1.71 | 2.06 | 2.50 | 2.91 | 3.35 | 3.83 | 4.32 | 4.69 |
| 2.82 | 1.07 | 1.18 | 1.37 | 1.70 | 2.00 | 2.40 | 2.78 | 3.24 | 3.67 | 4.16 | 4.58 |
| 2.87 | 0.91 | 1.06 | 1.21 | 1.62 | 1.94 | 2.28 | 2.66 | 3.20 | 3.62 | 4.05 | 4.52 |
| 2.92 | 1.02 | 1.13 | 1.40 | 1.74 | 2.08 | 2.44 | 2.80 | 3.26 | 3.67 | 4.22 | 4.67 |
| 2.97 | 1.08 | 1.20 | 1.43 | 1.76 | 2.05 | 2.48 | 2.91 | 3.34 | 3.77 | 4.21 | 4.68 |
| 3.02 | 1.20 | 1.34 | 1.61 | 1.93 | 2.30 | 2.67 | 3.08 | 3.52 | 4.05 | 4.51 | 4.94 |
| 3.07 | 1.07 | 1.22 | 1.53 | 1.84 | 2.26 | 2.65 | 3.05 | 3.48 | 3.95 | 4.44 | 4.95 |
| 3.12 | 1.31 | 1.49 | 1.72 | 2.05 | 2.36 | 2.80 | 3.27 | 3.73 | 4.20 | 4.65 | 5.13 |
| 3.17 | 1.37 | 1.61 | 1.84 | 2.12 | 2.47 | 2.82 | 3.23 | 3.79 | 4.19 | 4.75 | 5.18 |
| 3.22 | 1.39 | 1.53 | 1.81 | 2.13 | 2.50 | 2.94 | 3.39 | 3.74 | 4.21 | 4.77 | 5.23 |
| 3.27 | 1.37 | 1.57 | 1.83 | 2.07 | 2.49 | 2.81 | 3.24 | 3.66 | 4.17 | 4.68 | 5.02 |
| 3.32 | 1.47 | 1.67 | 1.90 | 2.20 | 2.65 | 3.11 | 3.43 | 3.91 | 4.42 | 4.94 | 5.41 |
| 3.37 | 1.27 | 1.46 | 1.66 | 1.98 | 2.38 | 2.75 | 3.14 | 3.67 | 4.08 | 4.55 | 5.04 |
| 3.42 | 1.55 | 1.70 | 1.89 | 2.31 | 2.68 | 3.04 | 3.47 | 3.94 | 4.43 | 4.86 | 5.33 |
| 3.47 | 1.38 | 1.60 | 1.89 | 2.19 | 2.56 | 2.99 | 3.41 | 3.89 | 4.36 | 4.88 | 5.31 |
| 3.52 | 1.39 | 1.61 | 1.87 | 2.14 | 2.54 | 2.91 | 3.28 | 3.79 | 4.24 | 4.70 | 5.19 |
| 3.57 | 1.49 | 1.59 | 1.82 | 2.17 | 2.54 | 2.90 | 3.35 | 3.78 | 4.20 | 4.63 | 5.13 |
| 3.62 | 1.66 | 1.82 | 2.10 | 2.35 | 2.76 | 3.09 | 3.51 | 4.01 | 4.50 | 4.95 | 5.43 |
| 3.67 | 1.49 | 1.59 | 1.78 | 2.18 | 2.59 | 2.97 | 3.34 | 3.78 | 4.27 | 4.69 | 5.19 |
| 3.72 | 1.63 | 1.78 | 2.02 | 2.37 | 2.77 | 3.09 | 3.56 | 3.98 | 4.47 | 4.94 | 5.39 |
| 3.92 | 1.75 | 1.95 | 2.26 | 2.55 | 2.96 | 3.38 | 3.85 | 4.29 | 4.73 | 5.28 | 5.76 |
| 4.12 | 1.76 | 1.98 | 2.22 | 2.55 | 2.93 | 3.33 | 3.72 | 4.17 | 4.66 | 5.14 | 5.53 |
| 4.32 | 1.80 | 1.97 | 2.29 | 2.56 | 2.91 | 3.21 | 3.64 | 4.14 | 4.59 | 5.07 | 5.54 |
| 4.52 | 1.82 | 2.07 | 2.22 | 2.59 | 3.00 | 3.36 | 3.79 | 4.21 | 4.69 | 5.20 | 5.69 |
| 4.72 | 1.84 | 2.01 | 2.25 | 2.56 | 2.97 | 3.34 | 3.70 | 4.17 | 4.71 | 5.17 | 5.60 |
| 4.92 | 2.13 | 2.32 | 2.52 | 2.90 | 3.27 | 3.67 | 4.07 | 4.57 | 5.02 | 5.58 | 5.99 |
| 5.12 | 2.06 | 2.19 | 2.49 | 2.76 | 3.15 | 3.57 | 4.02 | 4.46 | 4.91 | 5.45 | 5.93 |
| 5.32 | 2.22 | 2.36 | 2.61 | 2.93 | 3.31 | 3.70 | 4.18 | 4.65 | 5.13 | 5.62 | 6.10 |
| 5.52 | 2.17 | 2.39 | 2.61 | 2.93 | 3.31 | 3.71 | 4.18 | 4.67 | 5.14 | 5.66 | 6.12 |
| 5.72 | 2.22 | 2.39 | 2.70 | 3.00 | 3.42 | 3.79 | 4.29 | 4.79 | 5.29 | 5.76 | 6.28 |
| 5.92 | 2.03 | 2.22 | 2.40 | 2.76 | 3.14 | 3.58 | 4.02 | 4.45 | 5.01 | 5.44 | 5.91 |
| 6.12 | 2.21 | 2.37 | 2.55 | 2.97 | 3.36 | 3.71 | 4.17 | 4.68 | 5.20 | 5.71 | 6.16 |
| 6.32 | 1.99 | 2.11 | 2.39 | 2.66 | 3.10 | 3.46 | 3.86 | 4.43 | 4.88 | 5.39 | 5.85 |
| 6.52 | 2.13 | 2.36 | 2.54 | 2.86 | 3.20 | 3.63 | 4.03 | 4.57 | 5.01 | 5.50 | 6.01 |
| 6.72 | 2.31 | 2.51 | 2.76 | 3.04 | 3.48 | 3.92 | 4.36 | 4.84 | 5.38 | 5.90 | 6.38 |
| 6.92 | 2.03 | 2.26 | 2.46 | 2.83 | 3.20 | 3.59 | 4.03 | 4.51 | 5.03 | 5.55 | 5.98 |
| 7.12 | 2.20 | 2.27 | 2.55 | 2.84 | 3.17 | 3.61 | 4.06 | 4.49 | 5.00 | 5.52 | 5.99 |
| 7.32 | 2.21 | 2.37 | 2.50 | 2.95 | 3.28 | 3.74 | 4.19 | 4.73 | 5.17 | 5.74 | 6.21 |
| 7.52 | 2.22 | 2.26 | 2.58 | 2.86 | 3.21 | 3.61 | 4.13 | 4.61 | 5.02 | 5.63 | 6.07 |
| 7.72 | 2.19 | 2.32 | 2.56 | 2.84 | 3.23 | 3.68 | 4.12 | 4.61 | 5.10 | 5.53 | 6.10 |
| 7.92 | 2.15 | 2.30 | 2.55 | 2.87 | 3.27 | 3.67 | 4.10 | 4.63 | 5.07 | 5.61 | 6.08 |
| 8.12 | 2.22 | 2.39 | 2.64 | 3.00 | 3.45 | 3.73 | 4.19 | 4.68 | 5.12 | 5.69 | 6.24 |
| 8.32 | 2.29 | 2.44 | 2.58 | 2.88 | 3.31 | 3.70 | 4.15 | 4.66 | 5.13 | 5.65 | 6.07 |
| 8.52 | 2.08 | 2.24 | 2.49 | 2.72 | 3.19 | 3.56 | 4.03 | 4.48 | 4.98 | 5.43 | 5.89 |

|       |      |      |      |      |      |      |      |      |      |      |      |
|-------|------|------|------|------|------|------|------|------|------|------|------|
| 8.72  | 2.05 | 2.26 | 2.51 | 2.81 | 3.19 | 3.63 | 4.12 | 4.58 | 5.10 | 5.62 | 6.07 |
| 8.92  | 2.03 | 2.12 | 2.34 | 2.65 | 3.08 | 3.46 | 3.92 | 4.40 | 4.92 | 5.39 | 5.93 |
| 9.12  | 2.18 | 2.37 | 2.53 | 2.91 | 3.30 | 3.71 | 4.15 | 4.66 | 5.18 | 5.75 | 6.25 |
| 9.32  | 2.01 | 2.15 | 2.34 | 2.66 | 3.00 | 3.46 | 3.87 | 4.32 | 4.83 | 5.31 | 5.77 |
| 9.52  | 2.16 | 2.24 | 2.52 | 2.89 | 3.24 | 3.62 | 4.10 | 4.56 | 5.10 | 5.59 | 6.09 |
| 9.72  | 2.17 | 2.35 | 2.50 | 2.81 | 3.24 | 3.58 | 4.05 | 4.56 | 5.04 | 5.57 | 6.03 |
| 9.92  | 2.24 | 2.44 | 2.68 | 2.99 | 3.29 | 3.75 | 4.15 | 4.58 | 5.05 | 5.60 | 6.08 |
| 10.12 | 2.20 | 2.35 | 2.59 | 2.92 | 3.30 | 3.75 | 4.20 | 4.66 | 5.13 | 5.72 | 6.23 |
| 10.32 | 2.07 | 2.10 | 2.40 | 2.64 | 3.02 | 3.36 | 3.85 | 4.31 | 4.80 | 5.26 | 5.71 |
| 10.52 | 2.01 | 2.17 | 2.35 | 2.71 | 3.16 | 3.47 | 3.93 | 4.47 | 4.89 | 5.40 | 5.92 |
| 10.72 | 2.22 | 2.31 | 2.55 | 2.88 | 3.32 | 3.63 | 4.13 | 4.60 | 5.14 | 5.65 | 6.09 |
| 10.92 | 2.08 | 2.27 | 2.46 | 2.77 | 3.18 | 3.55 | 4.03 | 4.46 | 5.02 | 5.52 | 5.99 |
| 11.12 | 2.01 | 2.25 | 2.37 | 2.73 | 3.18 | 3.50 | 3.91 | 4.44 | 4.86 | 5.37 | 5.88 |
| 11.32 | 2.27 | 2.37 | 2.59 | 2.91 | 3.29 | 3.73 | 4.17 | 4.63 | 5.19 | 5.65 | 6.12 |
| 11.52 | 2.05 | 2.11 | 2.36 | 2.73 | 3.02 | 3.42 | 3.93 | 4.41 | 4.89 | 5.40 | 5.86 |
| 11.72 | 2.08 | 2.18 | 2.47 | 2.73 | 3.12 | 3.47 | 3.90 | 4.45 | 4.89 | 5.40 | 5.90 |
| 11.92 | 1.92 | 2.04 | 2.24 | 2.60 | 3.02 | 3.40 | 3.85 | 4.36 | 4.83 | 5.40 | 5.87 |
| 12.12 | 2.03 | 2.22 | 2.42 | 2.73 | 3.19 | 3.57 | 4.06 | 4.53 | 5.07 | 5.59 | 6.12 |
| 12.32 | 2.09 | 2.25 | 2.42 | 2.76 | 3.11 | 3.59 | 4.01 | 4.50 | 5.03 | 5.56 | 6.01 |
| 12.52 | 1.98 | 2.09 | 2.31 | 2.64 | 3.00 | 3.43 | 3.84 | 4.30 | 4.84 | 5.39 | 5.87 |
| 12.72 | 2.25 | 2.35 | 2.57 | 2.89 | 3.23 | 3.67 | 4.04 | 4.53 | 5.03 | 5.55 | 6.05 |
| 12.92 | 2.20 | 2.31 | 2.50 | 2.80 | 3.13 | 3.58 | 4.03 | 4.52 | 5.00 | 5.55 | 6.01 |
| 13.12 | 1.90 | 2.10 | 2.29 | 2.60 | 2.93 | 3.35 | 3.76 | 4.26 | 4.70 | 5.28 | 5.71 |
| 13.32 | 2.01 | 2.09 | 2.39 | 2.69 | 3.15 | 3.47 | 3.94 | 4.46 | 4.96 | 5.45 | 5.92 |
| 13.52 | 1.96 | 2.15 | 2.39 | 2.62 | 3.12 | 3.38 | 3.83 | 4.24 | 4.75 | 5.25 | 5.75 |
| 13.72 | 2.26 | 2.39 | 2.61 | 2.94 | 3.30 | 3.70 | 4.14 | 4.69 | 5.18 | 5.67 | 6.20 |
| 13.92 | 1.96 | 2.04 | 2.32 | 2.59 | 2.97 | 3.38 | 3.83 | 4.30 | 4.75 | 5.28 | 5.84 |
| 14.00 | 2.19 | 2.29 | 2.50 | 2.83 | 3.18 | 3.66 | 4.12 | 4.61 | 5.13 | 5.65 | 6.15 |
| 14.08 | 2.06 | 2.24 | 2.44 | 2.80 | 3.12 | 3.53 | 3.96 | 4.43 | 4.94 | 5.51 | 5.94 |
| 14.17 | 1.96 | 2.06 | 2.32 | 2.67 | 3.04 | 3.44 | 3.86 | 4.33 | 4.77 | 5.33 | 5.79 |
| 14.27 | 1.91 | 2.11 | 2.28 | 2.58 | 2.97 | 3.42 | 3.80 | 4.26 | 4.77 | 5.26 | 5.80 |
| 14.38 | 2.02 | 2.19 | 2.36 | 2.70 | 3.12 | 3.56 | 3.96 | 4.44 | 4.95 | 5.49 | 5.94 |
| 14.49 | 1.96 | 2.08 | 2.24 | 2.54 | 2.95 | 3.40 | 3.71 | 4.25 | 4.76 | 5.21 | 5.70 |
| 14.61 | 1.90 | 2.04 | 2.21 | 2.58 | 2.96 | 3.43 | 3.87 | 4.32 | 4.77 | 5.31 | 5.76 |
| 14.75 | 1.87 | 2.05 | 2.24 | 2.54 | 2.95 | 3.30 | 3.74 | 4.26 | 4.72 | 5.25 | 5.70 |
| 14.89 | 2.41 | 2.55 | 2.68 | 3.09 | 3.50 | 3.92 | 4.32 | 4.85 | 5.35 | 5.90 | 6.39 |
| 15.05 | 1.89 | 2.11 | 2.27 | 2.63 | 2.97 | 3.39 | 3.76 | 4.30 | 4.80 | 5.36 | 5.87 |
| 15.21 | 2.09 | 2.20 | 2.49 | 2.76 | 3.12 | 3.58 | 3.99 | 4.52 | 5.01 | 5.53 | 6.06 |
| 15.39 | 2.00 | 2.17 | 2.27 | 2.63 | 3.04 | 3.44 | 3.80 | 4.29 | 4.80 | 5.27 | 5.72 |
| 15.59 | 1.92 | 2.09 | 2.30 | 2.60 | 3.01 | 3.38 | 3.86 | 4.38 | 4.90 | 5.38 | 5.86 |
| 15.80 | 2.09 | 2.26 | 2.48 | 2.81 | 3.18 | 3.61 | 4.03 | 4.51 | 5.05 | 5.58 | 6.08 |
| 16.02 | 1.93 | 2.11 | 2.29 | 2.63 | 3.01 | 3.34 | 3.72 | 4.31 | 4.72 | 5.22 | 5.70 |
| 16.27 | 2.20 | 2.33 | 2.61 | 2.96 | 3.25 | 3.70 | 4.08 | 4.64 | 5.18 | 5.69 | 6.19 |
| 16.53 | 1.90 | 2.05 | 2.28 | 2.62 | 2.94 | 3.38 | 3.84 | 4.31 | 4.82 | 5.34 | 5.86 |
| 16.81 | 1.83 | 1.90 | 2.18 | 2.50 | 2.79 | 3.26 | 3.68 | 4.13 | 4.66 | 5.13 | 5.61 |
| 17.12 | 2.09 | 2.21 | 2.41 | 2.79 | 3.13 | 3.55 | 4.07 | 4.52 | 5.01 | 5.57 | 6.00 |
| 17.45 | 1.89 | 1.93 | 2.19 | 2.48 | 2.83 | 3.24 | 3.69 | 4.21 | 4.65 | 5.14 | 5.64 |
| 17.81 | 2.08 | 2.17 | 2.46 | 2.80 | 3.18 | 3.59 | 4.01 | 4.49 | 5.01 | 5.59 | 6.06 |
| 18.19 | 2.02 | 2.15 | 2.43 | 2.85 | 3.21 | 3.63 | 4.08 | 4.59 | 5.13 | 5.64 | 6.18 |
| 18.60 | 2.02 | 2.21 | 2.44 | 2.77 | 3.10 | 3.51 | 4.02 | 4.53 | 5.06 | 5.58 | 6.10 |

|        |      |      |      |      |      |      |      |      |      |      |      |
|--------|------|------|------|------|------|------|------|------|------|------|------|
| 19.05  | 2.11 | 2.13 | 2.35 | 2.76 | 3.09 | 3.54 | 4.00 | 4.47 | 4.91 | 5.53 | 5.98 |
| 19.53  | 1.76 | 1.98 | 2.20 | 2.52 | 2.91 | 3.33 | 3.75 | 4.26 | 4.73 | 5.31 | 5.85 |
| 20.05  | 1.88 | 2.06 | 2.17 | 2.56 | 2.91 | 3.32 | 3.77 | 4.30 | 4.82 | 5.33 | 5.82 |
| 20.61  | 1.98 | 2.04 | 2.33 | 2.63 | 3.07 | 3.40 | 3.89 | 4.40 | 4.92 | 5.42 | 5.98 |
| 21.22  | 1.92 | 2.08 | 2.36 | 2.62 | 3.02 | 3.41 | 3.87 | 4.41 | 4.94 | 5.37 | 5.92 |
| 21.87  | 1.90 | 2.01 | 2.21 | 2.54 | 2.99 | 3.41 | 3.83 | 4.39 | 4.90 | 5.36 | 5.89 |
| 22.57  | 1.90 | 2.07 | 2.32 | 2.60 | 2.97 | 3.37 | 3.84 | 4.32 | 4.87 | 5.36 | 5.87 |
| 23.33  | 1.93 | 2.07 | 2.28 | 2.60 | 3.06 | 3.42 | 3.92 | 4.39 | 4.94 | 5.52 | 5.95 |
| 24.15  | 1.87 | 2.03 | 2.22 | 2.54 | 2.95 | 3.31 | 3.78 | 4.28 | 4.80 | 5.29 | 5.77 |
| 25.03  | 1.81 | 1.96 | 2.15 | 2.55 | 2.91 | 3.24 | 3.71 | 4.20 | 4.75 | 5.26 | 5.77 |
| 25.98  | 1.93 | 2.06 | 2.31 | 2.71 | 3.09 | 3.53 | 4.00 | 4.54 | 5.02 | 5.56 | 6.07 |
| 27.01  | 1.75 | 1.85 | 2.13 | 2.46 | 2.79 | 3.17 | 3.63 | 4.14 | 4.68 | 5.20 | 5.69 |
| 28.11  | 1.95 | 2.13 | 2.32 | 2.62 | 3.00 | 3.49 | 3.94 | 4.43 | 5.01 | 5.57 | 6.05 |
| 29.30  | 1.82 | 1.99 | 2.21 | 2.49 | 2.95 | 3.33 | 3.79 | 4.37 | 4.90 | 5.37 | 5.87 |
| 30.59  | 1.90 | 2.02 | 2.21 | 2.55 | 2.99 | 3.38 | 3.80 | 4.32 | 4.86 | 5.38 | 5.82 |
| 31.98  | 1.65 | 1.78 | 2.04 | 2.36 | 2.82 | 3.14 | 3.62 | 4.08 | 4.66 | 5.24 | 5.72 |
| 33.47  | 1.74 | 1.93 | 2.13 | 2.46 | 2.87 | 3.27 | 3.79 | 4.32 | 4.77 | 5.30 | 5.81 |
| 35.09  | 1.72 | 1.81 | 2.02 | 2.36 | 2.80 | 3.22 | 3.60 | 4.10 | 4.59 | 5.18 | 5.62 |
| 36.83  | 1.67 | 1.90 | 2.08 | 2.43 | 2.83 | 3.30 | 3.74 | 4.27 | 4.73 | 5.30 | 5.81 |
| 38.71  | 1.74 | 1.87 | 2.08 | 2.42 | 2.83 | 3.27 | 3.68 | 4.20 | 4.72 | 5.29 | 5.80 |
| 40.73  | 1.78 | 1.92 | 2.15 | 2.47 | 2.82 | 3.25 | 3.67 | 4.20 | 4.74 | 5.25 | 5.75 |
| 42.92  | 1.68 | 1.79 | 2.06 | 2.41 | 2.82 | 3.15 | 3.66 | 4.16 | 4.67 | 5.22 | 5.71 |
| 45.27  | 1.59 | 1.79 | 2.01 | 2.35 | 2.71 | 3.08 | 3.59 | 4.08 | 4.59 | 5.06 | 5.63 |
| 47.81  | 1.81 | 1.92 | 2.11 | 2.45 | 2.81 | 3.29 | 3.68 | 4.24 | 4.74 | 5.34 | 5.85 |
| 50.55  | 1.36 | 1.53 | 1.76 | 2.09 | 2.57 | 2.83 | 3.29 | 3.88 | 4.32 | 4.90 | 5.43 |
| 53.51  | 1.75 | 1.89 | 2.10 | 2.48 | 2.82 | 3.28 | 3.71 | 4.29 | 4.90 | 5.44 | 5.92 |
| 56.69  | 1.54 | 1.70 | 1.90 | 2.19 | 2.66 | 3.12 | 3.55 | 4.11 | 4.63 | 5.15 | 5.70 |
| 60.13  | 1.48 | 1.62 | 1.85 | 2.20 | 2.59 | 3.08 | 3.52 | 4.07 | 4.58 | 5.15 | 5.72 |
| 63.84  | 1.57 | 1.70 | 1.96 | 2.31 | 2.68 | 3.18 | 3.59 | 4.20 | 4.77 | 5.30 | 5.81 |
| 67.83  | 1.42 | 1.56 | 1.78 | 2.14 | 2.58 | 2.99 | 3.46 | 4.02 | 4.56 | 5.18 | 5.63 |
| 72.15  | 1.40 | 1.60 | 1.83 | 2.23 | 2.62 | 3.02 | 3.54 | 4.04 | 4.58 | 5.12 | 5.75 |
| 76.80  | 1.29 | 1.50 | 1.72 | 2.04 | 2.45 | 2.91 | 3.42 | 3.88 | 4.50 | 5.05 | 5.52 |
| 81.81  | 1.60 | 1.78 | 1.92 | 2.33 | 2.76 | 3.16 | 3.66 | 4.20 | 4.78 | 5.36 | 5.90 |
| 87.22  | 1.45 | 1.58 | 1.91 | 2.21 | 2.63 | 3.02 | 3.53 | 4.02 | 4.61 | 5.16 | 5.67 |
| 93.06  | 1.37 | 1.46 | 1.79 | 2.08 | 2.49 | 2.92 | 3.42 | 3.96 | 4.53 | 5.11 | 5.64 |
| 99.35  | 1.41 | 1.62 | 1.84 | 2.21 | 2.64 | 3.12 | 3.60 | 4.12 | 4.73 | 5.31 | 5.86 |
| 106.13 | 1.28 | 1.54 | 1.80 | 2.17 | 2.55 | 3.02 | 3.50 | 4.08 | 4.62 | 5.23 | 5.79 |
| 113.45 | 1.47 | 1.70 | 1.81 | 2.29 | 2.70 | 3.15 | 3.69 | 4.23 | 4.76 | 5.45 | 5.93 |
| 121.34 | 1.22 | 1.44 | 1.66 | 2.03 | 2.43 | 2.94 | 3.44 | 3.97 | 4.60 | 5.16 | 5.73 |
| 129.86 | 1.17 | 1.40 | 1.66 | 1.95 | 2.43 | 2.91 | 3.46 | 3.96 | 4.56 | 5.09 | 5.69 |
| 139.04 | 1.33 | 1.43 | 1.70 | 2.07 | 2.48 | 2.95 | 3.42 | 3.96 | 4.57 | 5.16 | 5.64 |
| 148.94 | 1.13 | 1.23 | 1.53 | 1.81 | 2.30 | 2.78 | 3.26 | 3.90 | 4.38 | 4.98 | 5.52 |
| 159.62 | 1.32 | 1.44 | 1.75 | 2.07 | 2.51 | 2.92 | 3.48 | 4.09 | 4.68 | 5.29 | 5.89 |
| 171.14 | 1.31 | 1.43 | 1.65 | 2.05 | 2.50 | 2.97 | 3.48 | 4.08 | 4.63 | 5.18 | 5.81 |
| 183.56 | 1.03 | 1.20 | 1.39 | 1.79 | 2.26 | 2.71 | 3.21 | 3.68 | 4.31 | 4.94 | 5.52 |
| 196.96 | 1.22 | 1.38 | 1.73 | 2.10 | 2.52 | 3.04 | 3.49 | 4.13 | 4.71 | 5.34 | 5.90 |
| 211.41 | 1.23 | 1.39 | 1.66 | 1.99 | 2.44 | 2.97 | 3.39 | 4.00 | 4.65 | 5.28 | 5.76 |
| 226.99 | 1.19 | 1.41 | 1.64 | 2.05 | 2.44 | 2.99 | 3.55 | 4.09 | 4.76 | 5.40 | 6.04 |
| 243.80 | 1.05 | 1.24 | 1.49 | 1.83 | 2.31 | 2.78 | 3.23 | 3.82 | 4.43 | 5.01 | 5.62 |
| 261.93 | 1.21 | 1.41 | 1.61 | 2.01 | 2.52 | 2.97 | 3.50 | 4.16 | 4.76 | 5.40 | 5.97 |

|         |      |      |      |      |      |      |      |      |      |      |      |
|---------|------|------|------|------|------|------|------|------|------|------|------|
| 281.48  | 1.11 | 1.24 | 1.56 | 2.00 | 2.41 | 2.98 | 3.51 | 4.14 | 4.80 | 5.45 | 6.03 |
| 302.56  | 1.06 | 1.25 | 1.63 | 1.97 | 2.44 | 2.94 | 3.45 | 4.03 | 4.68 | 5.30 | 5.91 |
| 325.30  | 1.27 | 1.43 | 1.66 | 2.11 | 2.56 | 3.07 | 3.65 | 4.17 | 4.86 | 5.52 | 6.15 |
| 349.83  | 1.06 | 1.27 | 1.55 | 1.95 | 2.47 | 2.92 | 3.49 | 4.15 | 4.72 | 5.37 | 6.03 |
| 376.28  | 1.12 | 1.31 | 1.61 | 2.04 | 2.56 | 2.95 | 3.55 | 4.25 | 4.84 | 5.59 | 6.13 |
| 404.81  | 1.39 | 1.57 | 1.82 | 2.23 | 2.74 | 3.29 | 3.80 | 4.38 | 5.00 | 5.68 | 6.31 |
| 435.58  | 1.16 | 1.33 | 1.64 | 2.08 | 2.54 | 3.01 | 3.58 | 4.28 | 4.90 | 5.59 | 6.18 |
| 468.76  | 1.32 | 1.51 | 1.78 | 2.18 | 2.60 | 3.18 | 3.61 | 4.33 | 4.98 | 5.63 | 6.31 |
| 504.55  | 1.16 | 1.37 | 1.70 | 2.07 | 2.51 | 3.10 | 3.66 | 4.27 | 4.89 | 5.52 | 6.22 |
| 543.15  | 1.26 | 1.36 | 1.71 | 2.13 | 2.66 | 3.12 | 3.73 | 4.36 | 5.08 | 5.65 | 6.38 |
| 584.78  | 1.22 | 1.34 | 1.73 | 2.17 | 2.57 | 3.05 | 3.61 | 4.28 | 4.92 | 5.62 | 6.31 |
| 629.68  | 1.29 | 1.57 | 1.84 | 2.20 | 2.68 | 3.17 | 3.74 | 4.32 | 5.02 | 5.68 | 6.31 |
| 678.10  | 1.22 | 1.48 | 1.78 | 2.21 | 2.64 | 3.28 | 3.92 | 4.58 | 5.27 | 5.96 | 6.63 |
| 730.33  | 1.49 | 1.71 | 2.08 | 2.45 | 2.97 | 3.52 | 4.15 | 4.79 | 5.47 | 6.21 | 6.91 |
| 786.65  | 1.46 | 1.68 | 2.12 | 2.48 | 3.01 | 3.52 | 4.08 | 4.70 | 5.45 | 6.14 | 6.77 |
| 847.40  | 1.44 | 1.65 | 1.96 | 2.38 | 2.90 | 3.47 | 4.07 | 4.77 | 5.43 | 6.15 | 6.83 |
| 912.92  | 1.58 | 1.86 | 2.11 | 2.56 | 3.05 | 3.64 | 4.24 | 4.96 | 5.60 | 6.32 | 7.00 |
| 983.58  | 1.48 | 1.73 | 2.03 | 2.50 | 3.15 | 3.63 | 4.25 | 4.90 | 5.60 | 6.36 | 7.08 |
| 1059.78 | 1.69 | 1.88 | 2.23 | 2.68 | 3.22 | 3.77 | 4.37 | 5.13 | 5.82 | 6.63 | 7.28 |
| 1141.98 | 1.60 | 1.88 | 2.21 | 2.58 | 3.17 | 3.73 | 4.29 | 5.02 | 5.73 | 6.45 | 7.12 |
| 1230.62 | 1.53 | 1.75 | 2.09 | 2.51 | 3.04 | 3.54 | 4.13 | 4.83 | 5.51 | 6.18 | 6.91 |
| 1326.23 | 1.76 | 1.97 | 2.28 | 2.74 | 3.27 | 3.82 | 4.46 | 5.12 | 5.93 | 6.63 | 7.32 |
| 1429.34 | 1.91 | 2.19 | 2.55 | 3.02 | 3.57 | 4.11 | 4.75 | 5.52 | 6.26 | 6.99 | 7.74 |
| 1540.54 | 1.94 | 2.16 | 2.46 | 3.02 | 3.51 | 4.07 | 4.71 | 5.45 | 6.16 | 6.91 | 7.63 |
| 1660.48 | 1.93 | 2.09 | 2.50 | 2.90 | 3.49 | 4.13 | 4.76 | 5.43 | 6.24 | 7.01 | 7.71 |
| 1789.83 | 1.92 | 2.13 | 2.54 | 2.92 | 3.52 | 4.12 | 4.77 | 5.42 | 6.25 | 6.97 | 7.75 |
| 1929.34 | 2.11 | 2.37 | 2.67 | 3.23 | 3.76 | 4.33 | 4.96 | 5.68 | 6.46 | 7.24 | 7.99 |
| 2079.80 | 2.16 | 2.42 | 2.72 | 3.17 | 3.73 | 4.34 | 4.97 | 5.65 | 6.36 | 7.19 | 7.90 |
| 2242.08 | 2.10 | 2.42 | 2.70 | 3.19 | 3.70 | 4.32 | 4.96 | 5.71 | 6.45 | 7.21 | 7.96 |
| 2417.10 | 2.13 | 2.47 | 2.88 | 3.39 | 3.83 | 4.43 | 5.01 | 5.74 | 6.56 | 7.26 | 7.98 |
| 2605.85 | 2.25 | 2.47 | 2.76 | 3.29 | 3.87 | 4.39 | 5.07 | 5.75 | 6.52 | 7.21 | 7.97 |
| 2809.43 | 2.13 | 2.40 | 2.67 | 3.11 | 3.60 | 4.15 | 4.79 | 5.40 | 6.15 | 6.90 | 7.56 |
| 3028.99 | 2.14 | 2.32 | 2.69 | 3.19 | 3.76 | 4.33 | 4.95 | 5.68 | 6.37 | 7.14 | 7.92 |
| 3265.79 | 2.32 | 2.57 | 2.86 | 3.36 | 3.92 | 4.49 | 5.12 | 5.81 | 6.46 | 7.24 | 8.02 |
| 3521.18 | 2.29 | 2.55 | 2.88 | 3.27 | 3.87 | 4.43 | 5.11 | 5.75 | 6.48 | 7.21 | 7.90 |
| 3796.62 | 2.06 | 2.29 | 2.75 | 3.14 | 3.59 | 4.19 | 4.73 | 5.45 | 6.14 | 6.91 | 7.66 |

| Wavelength<br>(nm) | 553.11 | 554.52 | 555.93 | 557.34 | 558.75 | 560.16 | 561.57 | 562.97 | 564.38 | 565.79 | 567.20 |
|--------------------|--------|--------|--------|--------|--------|--------|--------|--------|--------|--------|--------|
| Time<br>(ps)       |        |        |        |        |        |        |        |        |        |        |        |
| -3.28              | -0.09  | -0.06  | -0.09  | -0.10  | -0.04  | -0.06  | -0.12  | -0.05  | -0.06  | -0.06  | -0.04  |
| -2.78              | -0.07  | -0.10  | -0.12  | -0.11  | -0.09  | -0.11  | -0.10  | -0.03  | -0.11  | -0.11  | -0.07  |
| -2.28              | -0.06  | -0.09  | -0.07  | -0.02  | -0.05  | -0.04  | -0.05  | -0.05  | -0.08  | -0.01  | -0.05  |
| -1.78              | 0.24   | 0.28   | 0.25   | 0.18   | 0.24   | 0.23   | 0.23   | 0.21   | 0.21   | 0.20   | 0.23   |
| -1.28              | 0.01   | -0.02  | -0.08  | 0.01   | -0.04  | -0.02  | -0.04  | -0.06  | -0.03  | -0.02  | -0.07  |
| -0.78              | -0.17  | -0.11  | -0.10  | -0.06  | -0.09  | -0.10  | -0.07  | -0.08  | -0.09  | -0.15  | -0.11  |
| -0.28              | 0.10   | 0.01   | 0.06   | 0.09   | 0.06   | 0.05   | 0.09   | 0.05   | 0.11   | 0.08   | 0.07   |
| 0.22               | 0.10   | 0.12   | 0.10   | 0.05   | 0.08   | 0.07   | 0.10   | 0.09   | 0.08   | 0.09   | 0.07   |
| 0.32               | -0.11  | -0.06  | -0.05  | -0.12  | -0.08  | -0.07  | -0.07  | -0.05  | -0.07  | -0.05  | -0.03  |
| 0.42               | 0.07   | 0.04   | 0.08   | 0.08   | 0.02   | 0.04   | 0.03   | -0.03  | 0.03   | 0.03   | 0.00   |

|      |       |       |       |       |       |       |       |       |       |       |       |
|------|-------|-------|-------|-------|-------|-------|-------|-------|-------|-------|-------|
| 0.52 | -0.03 | -0.07 | -0.03 | -0.06 | 0.02  | 0.04  | -0.06 | -0.03 | 0.01  | -0.09 | -0.08 |
| 0.62 | 0.08  | 0.00  | 0.05  | 0.03  | 0.08  | 0.02  | 0.10  | 0.03  | 0.02  | 0.06  | 0.07  |
| 0.72 | 0.18  | 0.08  | 0.16  | 0.10  | 0.14  | 0.17  | 0.08  | 0.10  | 0.08  | 0.09  | 0.09  |
| 0.77 | 0.04  | 0.03  | 0.03  | 0.08  | 0.02  | 0.05  | 0.06  | 0.06  | 0.07  | 0.03  | 0.03  |
| 0.82 | 0.11  | 0.04  | 0.02  | 0.06  | 0.06  | 0.05  | 0.07  | 0.03  | 0.03  | 0.00  | 0.05  |
| 0.87 | 0.03  | 0.07  | 0.08  | 0.02  | 0.06  | 0.09  | 0.05  | 0.03  | 0.11  | 0.08  | 0.01  |
| 0.92 | 0.00  | -0.06 | -0.06 | -0.07 | -0.04 | -0.06 | -0.10 | -0.07 | -0.02 | -0.10 | -0.09 |
| 0.97 | 0.01  | -0.02 | 0.02  | 0.01  | 0.02  | 0.08  | 0.06  | 0.04  | 0.05  | 0.02  | 0.06  |
| 1.02 | -0.17 | -0.15 | -0.12 | -0.09 | -0.07 | -0.09 | -0.10 | -0.13 | -0.13 | -0.09 | -0.10 |
| 1.07 | 0.14  | 0.13  | 0.15  | 0.13  | 0.12  | 0.12  | 0.13  | 0.10  | 0.15  | 0.10  | 0.10  |
| 1.12 | -0.20 | -0.18 | -0.21 | -0.25 | -0.18 | -0.19 | -0.16 | -0.19 | -0.21 | -0.19 | -0.15 |
| 1.17 | -0.15 | -0.14 | -0.09 | -0.14 | -0.07 | -0.08 | -0.14 | -0.09 | -0.11 | -0.12 | -0.11 |
| 1.22 | -0.07 | -0.11 | -0.05 | -0.15 | -0.07 | -0.06 | -0.03 | -0.06 | -0.02 | -0.06 | -0.05 |
| 1.27 | 0.09  | 0.10  | 0.09  | 0.14  | 0.07  | 0.11  | 0.09  | 0.08  | 0.11  | 0.12  | 0.08  |
| 1.32 | 0.05  | 0.08  | 0.07  | 0.04  | 0.04  | 0.08  | 0.05  | 0.05  | 0.04  | 0.06  | 0.03  |
| 1.37 | -0.01 | -0.06 | -0.06 | -0.10 | -0.02 | 0.00  | -0.07 | -0.05 | -0.05 | -0.06 | -0.05 |
| 1.42 | -0.13 | -0.10 | -0.08 | -0.03 | -0.08 | -0.07 | -0.07 | -0.05 | -0.10 | -0.13 | -0.09 |
| 1.47 | -0.07 | -0.14 | -0.13 | -0.14 | -0.13 | -0.12 | -0.19 | -0.21 | -0.19 | -0.30 | -0.30 |
| 1.52 | 1.92  | 1.93  | 1.89  | 1.79  | 1.76  | 1.69  | 1.60  | 1.46  | 1.34  | 1.21  | 1.05  |
| 1.57 | 4.59  | 4.84  | 5.20  | 5.31  | 5.49  | 5.61  | 5.71  | 5.71  | 5.70  | 5.66  | 5.57  |
| 1.62 | 4.90  | 5.51  | 6.08  | 6.57  | 7.03  | 7.54  | 7.89  | 8.22  | 8.45  | 8.69  | 8.89  |
| 1.67 | 3.91  | 4.64  | 5.32  | 5.91  | 6.49  | 7.02  | 7.52  | 7.94  | 8.40  | 8.76  | 9.12  |
| 1.72 | 3.31  | 3.95  | 4.59  | 5.18  | 5.74  | 6.25  | 6.73  | 7.14  | 7.57  | 7.88  | 8.19  |
| 1.77 | 2.99  | 3.51  | 4.13  | 4.64  | 5.16  | 5.69  | 6.13  | 6.54  | 6.88  | 7.22  | 7.50  |
| 1.82 | 2.69  | 3.24  | 3.73  | 4.19  | 4.72  | 5.10  | 5.53  | 5.88  | 6.24  | 6.53  | 6.80  |
| 1.87 | 2.77  | 3.26  | 3.77  | 4.21  | 4.61  | 5.03  | 5.39  | 5.72  | 6.01  | 6.31  | 6.55  |
| 1.92 | 2.87  | 3.36  | 3.86  | 4.30  | 4.68  | 5.10  | 5.47  | 5.76  | 6.12  | 6.33  | 6.63  |
| 1.97 | 2.96  | 3.45  | 3.93  | 4.38  | 4.86  | 5.24  | 5.58  | 5.90  | 6.19  | 6.43  | 6.72  |
| 2.02 | 3.34  | 3.82  | 4.28  | 4.74  | 5.16  | 5.49  | 5.82  | 6.11  | 6.38  | 6.63  | 6.84  |
| 2.07 | 3.36  | 3.82  | 4.32  | 4.75  | 5.15  | 5.51  | 5.82  | 6.09  | 6.37  | 6.57  | 6.79  |
| 2.12 | 3.98  | 4.41  | 4.89  | 5.32  | 5.74  | 6.08  | 6.48  | 6.69  | 6.98  | 7.18  | 7.42  |
| 2.17 | 3.97  | 4.46  | 4.84  | 5.26  | 5.67  | 6.00  | 6.28  | 6.56  | 6.76  | 6.99  | 7.18  |
| 2.22 | 3.88  | 4.33  | 4.79  | 5.17  | 5.63  | 5.95  | 6.23  | 6.49  | 6.77  | 6.93  | 7.08  |
| 2.27 | 4.10  | 4.59  | 5.02  | 5.35  | 5.74  | 6.03  | 6.38  | 6.61  | 6.86  | 7.00  | 7.22  |
| 2.32 | 4.18  | 4.57  | 5.03  | 5.40  | 5.74  | 6.03  | 6.34  | 6.62  | 6.77  | 7.00  | 7.16  |
| 2.37 | 4.28  | 4.73  | 5.19  | 5.57  | 5.96  | 6.30  | 6.57  | 6.75  | 7.06  | 7.20  | 7.37  |
| 2.42 | 4.49  | 4.93  | 5.37  | 5.74  | 6.13  | 6.42  | 6.68  | 6.93  | 7.11  | 7.30  | 7.46  |
| 2.47 | 4.38  | 4.78  | 5.26  | 5.58  | 5.89  | 6.25  | 6.52  | 6.72  | 6.95  | 7.09  | 7.22  |
| 2.52 | 4.63  | 5.03  | 5.40  | 5.79  | 6.21  | 6.51  | 6.74  | 7.02  | 7.19  | 7.33  | 7.50  |
| 2.57 | 4.40  | 4.83  | 5.31  | 5.65  | 5.97  | 6.29  | 6.56  | 6.72  | 6.94  | 7.13  | 7.27  |
| 2.62 | 4.82  | 5.26  | 5.64  | 5.98  | 6.33  | 6.61  | 6.87  | 7.05  | 7.28  | 7.41  | 7.54  |
| 2.67 | 4.54  | 4.94  | 5.40  | 5.68  | 6.04  | 6.33  | 6.56  | 6.74  | 6.94  | 7.03  | 7.18  |
| 2.72 | 4.91  | 5.31  | 5.73  | 6.07  | 6.46  | 6.69  | 6.96  | 7.12  | 7.24  | 7.45  | 7.56  |
| 2.77 | 5.20  | 5.61  | 6.01  | 6.37  | 6.65  | 6.98  | 7.20  | 7.41  | 7.59  | 7.70  | 7.83  |
| 2.82 | 5.08  | 5.46  | 5.80  | 6.16  | 6.50  | 6.79  | 7.02  | 7.20  | 7.33  | 7.48  | 7.60  |
| 2.87 | 4.93  | 5.43  | 5.81  | 6.08  | 6.45  | 6.73  | 7.01  | 7.17  | 7.30  | 7.45  | 7.58  |
| 2.92 | 5.08  | 5.52  | 5.89  | 6.21  | 6.53  | 6.87  | 7.04  | 7.28  | 7.37  | 7.57  | 7.69  |
| 2.97 | 5.10  | 5.53  | 5.91  | 6.32  | 6.59  | 6.90  | 7.10  | 7.32  | 7.45  | 7.56  | 7.66  |
| 3.02 | 5.45  | 5.87  | 6.22  | 6.62  | 6.92  | 7.18  | 7.41  | 7.61  | 7.79  | 7.88  | 8.02  |
| 3.07 | 5.40  | 5.78  | 6.24  | 6.53  | 6.86  | 7.19  | 7.34  | 7.53  | 7.71  | 7.80  | 7.84  |



|       |      |      |      |      |      |      |      |      |      |      |      |
|-------|------|------|------|------|------|------|------|------|------|------|------|
| 3.12  | 5.60 | 6.01 | 6.43 | 6.78 | 7.10 | 7.39 | 7.58 | 7.78 | 7.93 | 8.00 | 8.10 |
| 3.17  | 5.70 | 6.09 | 6.54 | 6.85 | 7.14 | 7.41 | 7.63 | 7.82 | 7.98 | 8.04 | 8.14 |
| 3.22  | 5.65 | 6.04 | 6.46 | 6.82 | 7.13 | 7.37 | 7.61 | 7.75 | 7.93 | 8.01 | 8.07 |
| 3.27  | 5.53 | 5.99 | 6.31 | 6.65 | 7.01 | 7.21 | 7.44 | 7.60 | 7.75 | 7.86 | 7.93 |
| 3.32  | 5.90 | 6.31 | 6.73 | 7.03 | 7.38 | 7.66 | 7.83 | 8.04 | 8.22 | 8.29 | 8.36 |
| 3.37  | 5.50 | 5.91 | 6.30 | 6.65 | 6.91 | 7.22 | 7.41 | 7.55 | 7.69 | 7.78 | 7.88 |
| 3.42  | 5.83 | 6.24 | 6.65 | 6.96 | 7.28 | 7.55 | 7.76 | 7.93 | 8.10 | 8.15 | 8.24 |
| 3.47  | 5.80 | 6.16 | 6.60 | 6.96 | 7.24 | 7.54 | 7.78 | 7.97 | 8.04 | 8.09 | 8.23 |
| 3.52  | 5.63 | 6.08 | 6.46 | 6.82 | 7.13 | 7.34 | 7.57 | 7.76 | 7.89 | 8.01 | 8.02 |
| 3.57  | 5.55 | 5.94 | 6.34 | 6.71 | 7.01 | 7.22 | 7.42 | 7.63 | 7.72 | 7.78 | 7.85 |
| 3.62  | 5.86 | 6.30 | 6.66 | 7.00 | 7.30 | 7.57 | 7.72 | 7.91 | 8.01 | 8.07 | 8.15 |
| 3.67  | 5.62 | 6.08 | 6.45 | 6.73 | 7.04 | 7.38 | 7.48 | 7.64 | 7.82 | 7.84 | 7.95 |
| 3.72  | 5.87 | 6.27 | 6.61 | 7.00 | 7.27 | 7.54 | 7.77 | 7.86 | 8.01 | 8.08 | 8.14 |
| 3.92  | 6.25 | 6.66 | 7.11 | 7.46 | 7.72 | 8.02 | 8.25 | 8.40 | 8.54 | 8.54 | 8.59 |
| 4.12  | 6.05 | 6.44 | 6.86 | 7.21 | 7.44 | 7.79 | 7.90 | 8.03 | 8.20 | 8.28 | 8.30 |
| 4.32  | 5.92 | 6.40 | 6.81 | 7.12 | 7.39 | 7.69 | 7.88 | 7.99 | 8.07 | 8.08 | 8.15 |
| 4.52  | 6.11 | 6.54 | 6.98 | 7.28 | 7.61 | 7.83 | 8.03 | 8.11 | 8.26 | 8.29 | 8.34 |
| 4.72  | 6.14 | 6.54 | 6.82 | 7.19 | 7.50 | 7.79 | 7.97 | 8.05 | 8.17 | 8.22 | 8.24 |
| 4.92  | 6.49 | 6.95 | 7.33 | 7.70 | 8.01 | 8.23 | 8.41 | 8.55 | 8.61 | 8.68 | 8.72 |
| 5.12  | 6.32 | 6.80 | 7.16 | 7.46 | 7.75 | 8.01 | 8.20 | 8.31 | 8.37 | 8.46 | 8.48 |
| 5.32  | 6.54 | 6.97 | 7.37 | 7.66 | 7.98 | 8.24 | 8.42 | 8.55 | 8.68 | 8.66 | 8.72 |
| 5.52  | 6.61 | 7.01 | 7.44 | 7.76 | 8.07 | 8.24 | 8.43 | 8.55 | 8.68 | 8.69 | 8.71 |
| 5.72  | 6.75 | 7.17 | 7.58 | 7.89 | 8.19 | 8.45 | 8.63 | 8.71 | 8.80 | 8.85 | 8.85 |
| 5.92  | 6.45 | 6.85 | 7.27 | 7.56 | 7.85 | 8.09 | 8.31 | 8.42 | 8.55 | 8.54 | 8.53 |
| 6.12  | 6.67 | 7.07 | 7.48 | 7.80 | 8.15 | 8.40 | 8.42 | 8.53 | 8.66 | 8.69 | 8.66 |
| 6.32  | 6.32 | 6.72 | 7.20 | 7.46 | 7.78 | 8.02 | 8.22 | 8.34 | 8.41 | 8.47 | 8.43 |
| 6.52  | 6.44 | 6.85 | 7.28 | 7.57 | 7.93 | 8.10 | 8.30 | 8.40 | 8.51 | 8.49 | 8.48 |
| 6.72  | 6.89 | 7.31 | 7.70 | 8.06 | 8.37 | 8.60 | 8.78 | 8.90 | 8.95 | 8.96 | 9.00 |
| 6.92  | 6.48 | 6.92 | 7.25 | 7.60 | 7.91 | 8.18 | 8.33 | 8.42 | 8.52 | 8.58 | 8.54 |
| 7.12  | 6.46 | 6.89 | 7.28 | 7.62 | 7.85 | 8.09 | 8.32 | 8.39 | 8.52 | 8.50 | 8.49 |
| 7.32  | 6.75 | 7.18 | 7.57 | 7.86 | 8.19 | 8.40 | 8.62 | 8.72 | 8.82 | 8.84 | 8.85 |
| 7.52  | 6.57 | 7.04 | 7.42 | 7.66 | 8.07 | 8.20 | 8.39 | 8.53 | 8.61 | 8.63 | 8.66 |
| 7.72  | 6.58 | 7.01 | 7.42 | 7.78 | 8.13 | 8.28 | 8.46 | 8.54 | 8.66 | 8.67 | 8.64 |
| 7.92  | 6.55 | 6.97 | 7.36 | 7.66 | 7.99 | 8.21 | 8.40 | 8.46 | 8.53 | 8.56 | 8.58 |
| 8.12  | 6.67 | 7.12 | 7.53 | 7.78 | 8.05 | 8.31 | 8.44 | 8.61 | 8.70 | 8.70 | 8.71 |
| 8.32  | 6.59 | 7.00 | 7.39 | 7.70 | 7.99 | 8.26 | 8.41 | 8.51 | 8.57 | 8.61 | 8.58 |
| 8.52  | 6.47 | 6.86 | 7.24 | 7.56 | 7.79 | 8.00 | 8.21 | 8.31 | 8.38 | 8.37 | 8.39 |
| 8.72  | 6.56 | 7.02 | 7.43 | 7.77 | 8.10 | 8.34 | 8.45 | 8.59 | 8.71 | 8.66 | 8.70 |
| 8.92  | 6.37 | 6.85 | 7.26 | 7.58 | 7.87 | 8.14 | 8.29 | 8.41 | 8.42 | 8.47 | 8.46 |
| 9.12  | 6.71 | 7.17 | 7.57 | 7.83 | 8.14 | 8.35 | 8.53 | 8.62 | 8.72 | 8.72 | 8.71 |
| 9.32  | 6.24 | 6.64 | 7.07 | 7.36 | 7.62 | 7.88 | 8.01 | 8.12 | 8.18 | 8.13 | 8.19 |
| 9.52  | 6.55 | 6.95 | 7.41 | 7.77 | 8.02 | 8.26 | 8.40 | 8.52 | 8.58 | 8.63 | 8.63 |
| 9.72  | 6.52 | 6.97 | 7.30 | 7.66 | 7.94 | 8.14 | 8.29 | 8.41 | 8.41 | 8.47 | 8.42 |
| 9.92  | 6.53 | 6.96 | 7.32 | 7.66 | 7.94 | 8.19 | 8.31 | 8.40 | 8.49 | 8.48 | 8.52 |
| 10.12 | 6.66 | 7.12 | 7.53 | 7.88 | 8.18 | 8.40 | 8.58 | 8.70 | 8.78 | 8.76 | 8.73 |
| 10.32 | 6.21 | 6.57 | 6.97 | 7.30 | 7.62 | 7.83 | 7.93 | 8.05 | 8.16 | 8.12 | 8.08 |
| 10.52 | 6.33 | 6.78 | 7.19 | 7.51 | 7.87 | 8.04 | 8.23 | 8.31 | 8.39 | 8.35 | 8.37 |
| 10.72 | 6.58 | 7.07 | 7.43 | 7.73 | 8.06 | 8.29 | 8.45 | 8.54 | 8.64 | 8.65 | 8.56 |
| 10.92 | 6.53 | 6.91 | 7.26 | 7.61 | 7.87 | 8.09 | 8.23 | 8.31 | 8.43 | 8.42 | 8.41 |
| 11.12 | 6.40 | 6.82 | 7.23 | 7.54 | 7.80 | 8.03 | 8.21 | 8.25 | 8.36 | 8.34 | 8.31 |

|       |      |      |      |      |      |      |      |      |      |      |      |
|-------|------|------|------|------|------|------|------|------|------|------|------|
| 11.32 | 6.65 | 7.06 | 7.46 | 7.83 | 8.04 | 8.32 | 8.46 | 8.51 | 8.60 | 8.59 | 8.58 |
| 11.52 | 6.30 | 6.78 | 7.12 | 7.45 | 7.72 | 7.98 | 8.12 | 8.21 | 8.34 | 8.31 | 8.29 |
| 11.72 | 6.38 | 6.77 | 7.16 | 7.42 | 7.76 | 7.95 | 8.15 | 8.21 | 8.26 | 8.30 | 8.28 |
| 11.92 | 6.33 | 6.77 | 7.24 | 7.45 | 7.76 | 7.92 | 8.12 | 8.19 | 8.27 | 8.22 | 8.27 |
| 12.12 | 6.63 | 7.09 | 7.50 | 7.79 | 8.13 | 8.33 | 8.43 | 8.56 | 8.69 | 8.64 | 8.60 |
| 12.32 | 6.51 | 6.96 | 7.32 | 7.63 | 7.98 | 8.16 | 8.31 | 8.44 | 8.47 | 8.45 | 8.42 |
| 12.52 | 6.36 | 6.70 | 7.17 | 7.45 | 7.72 | 7.90 | 8.09 | 8.21 | 8.25 | 8.27 | 8.24 |
| 12.72 | 6.51 | 6.88 | 7.27 | 7.54 | 7.82 | 8.09 | 8.15 | 8.26 | 8.31 | 8.30 | 8.28 |
| 12.92 | 6.51 | 6.95 | 7.29 | 7.62 | 7.86 | 8.12 | 8.28 | 8.39 | 8.44 | 8.40 | 8.38 |
| 13.12 | 6.18 | 6.61 | 6.97 | 7.32 | 7.62 | 7.86 | 7.99 | 8.07 | 8.17 | 8.15 | 8.13 |
| 13.32 | 6.45 | 6.91 | 7.26 | 7.61 | 7.93 | 8.18 | 8.34 | 8.37 | 8.45 | 8.49 | 8.43 |
| 13.52 | 6.21 | 6.63 | 7.04 | 7.30 | 7.59 | 7.76 | 7.94 | 8.03 | 8.06 | 8.06 | 8.03 |
| 13.72 | 6.69 | 7.11 | 7.51 | 7.78 | 8.04 | 8.31 | 8.42 | 8.50 | 8.56 | 8.57 | 8.51 |
| 13.92 | 6.29 | 6.71 | 7.11 | 7.37 | 7.70 | 7.96 | 8.06 | 8.10 | 8.23 | 8.17 | 8.15 |
| 14.00 | 6.66 | 7.11 | 7.42 | 7.77 | 8.06 | 8.28 | 8.42 | 8.52 | 8.65 | 8.55 | 8.55 |
| 14.08 | 6.45 | 6.84 | 7.28 | 7.57 | 7.83 | 8.04 | 8.14 | 8.32 | 8.36 | 8.32 | 8.30 |
| 14.17 | 6.31 | 6.66 | 7.12 | 7.41 | 7.67 | 7.90 | 8.07 | 8.13 | 8.20 | 8.15 | 8.15 |
| 14.27 | 6.26 | 6.63 | 7.07 | 7.38 | 7.69 | 7.86 | 8.07 | 8.17 | 8.18 | 8.17 | 8.06 |
| 14.38 | 6.42 | 6.85 | 7.19 | 7.52 | 7.82 | 8.07 | 8.16 | 8.28 | 8.31 | 8.26 | 8.27 |
| 14.49 | 6.20 | 6.64 | 6.98 | 7.25 | 7.56 | 7.78 | 7.92 | 7.96 | 8.03 | 8.04 | 7.98 |
| 14.61 | 6.23 | 6.64 | 7.09 | 7.38 | 7.72 | 7.90 | 8.02 | 8.10 | 8.21 | 8.18 | 8.14 |
| 14.75 | 6.19 | 6.63 | 7.06 | 7.34 | 7.58 | 7.84 | 7.97 | 8.11 | 8.13 | 8.10 | 8.10 |
| 14.89 | 6.88 | 7.30 | 7.71 | 8.08 | 8.32 | 8.59 | 8.71 | 8.80 | 8.83 | 8.78 | 8.75 |
| 15.05 | 6.23 | 6.64 | 7.06 | 7.39 | 7.68 | 7.92 | 8.05 | 8.14 | 8.22 | 8.16 | 8.12 |
| 15.21 | 6.46 | 6.96 | 7.27 | 7.64 | 7.91 | 8.10 | 8.28 | 8.38 | 8.39 | 8.39 | 8.34 |
| 15.39 | 6.20 | 6.56 | 6.96 | 7.26 | 7.57 | 7.76 | 7.90 | 7.96 | 7.93 | 8.05 | 7.96 |
| 15.59 | 6.31 | 6.81 | 7.19 | 7.49 | 7.77 | 8.04 | 8.15 | 8.22 | 8.23 | 8.28 | 8.24 |
| 15.80 | 6.55 | 7.03 | 7.39 | 7.74 | 8.01 | 8.22 | 8.40 | 8.47 | 8.52 | 8.50 | 8.47 |
| 16.02 | 6.12 | 6.55 | 6.86 | 7.25 | 7.49 | 7.69 | 7.82 | 7.94 | 7.96 | 7.97 | 7.95 |
| 16.27 | 6.67 | 7.12 | 7.51 | 7.85 | 8.13 | 8.35 | 8.46 | 8.51 | 8.58 | 8.57 | 8.55 |
| 16.53 | 6.31 | 6.71 | 7.15 | 7.46 | 7.73 | 7.90 | 8.09 | 8.18 | 8.24 | 8.22 | 8.12 |
| 16.81 | 6.10 | 6.50 | 6.90 | 7.23 | 7.49 | 7.75 | 7.89 | 7.96 | 8.02 | 7.98 | 7.98 |
| 17.12 | 6.52 | 6.97 | 7.42 | 7.64 | 8.00 | 8.15 | 8.29 | 8.40 | 8.47 | 8.41 | 8.38 |
| 17.45 | 6.09 | 6.47 | 6.92 | 7.27 | 7.53 | 7.73 | 7.82 | 7.93 | 8.02 | 7.95 | 7.90 |
| 17.81 | 6.55 | 7.07 | 7.41 | 7.75 | 8.02 | 8.26 | 8.35 | 8.45 | 8.54 | 8.44 | 8.48 |
| 18.19 | 6.64 | 7.07 | 7.50 | 7.80 | 8.11 | 8.29 | 8.51 | 8.59 | 8.62 | 8.56 | 8.53 |
| 18.60 | 6.52 | 6.97 | 7.33 | 7.65 | 8.03 | 8.14 | 8.34 | 8.43 | 8.45 | 8.41 | 8.39 |
| 19.05 | 6.52 | 6.97 | 7.31 | 7.67 | 7.96 | 8.19 | 8.29 | 8.35 | 8.42 | 8.39 | 8.33 |
| 19.53 | 6.28 | 6.77 | 7.17 | 7.50 | 7.77 | 8.01 | 8.16 | 8.23 | 8.31 | 8.27 | 8.18 |
| 20.05 | 6.38 | 6.80 | 7.21 | 7.50 | 7.80 | 8.03 | 8.10 | 8.22 | 8.25 | 8.26 | 8.19 |
| 20.61 | 6.39 | 6.81 | 7.21 | 7.55 | 7.78 | 8.01 | 8.12 | 8.20 | 8.23 | 8.24 | 8.21 |
| 21.22 | 6.34 | 6.79 | 7.14 | 7.48 | 7.73 | 7.93 | 8.09 | 8.14 | 8.21 | 8.13 | 8.11 |
| 21.87 | 6.40 | 6.86 | 7.23 | 7.54 | 7.78 | 8.05 | 8.18 | 8.28 | 8.26 | 8.23 | 8.25 |
| 22.57 | 6.34 | 6.80 | 7.21 | 7.48 | 7.76 | 8.01 | 8.09 | 8.20 | 8.24 | 8.17 | 8.15 |
| 23.33 | 6.47 | 6.88 | 7.35 | 7.63 | 7.89 | 8.16 | 8.27 | 8.36 | 8.34 | 8.35 | 8.31 |
| 24.15 | 6.22 | 6.65 | 7.03 | 7.36 | 7.59 | 7.82 | 8.00 | 8.04 | 8.11 | 8.06 | 7.99 |
| 25.03 | 6.24 | 6.67 | 7.07 | 7.34 | 7.67 | 7.86 | 7.98 | 8.04 | 8.07 | 8.03 | 8.01 |
| 25.98 | 6.60 | 7.05 | 7.45 | 7.85 | 8.06 | 8.31 | 8.43 | 8.53 | 8.56 | 8.48 | 8.42 |
| 27.01 | 6.16 | 6.62 | 6.99 | 7.31 | 7.54 | 7.75 | 7.88 | 7.96 | 8.01 | 7.97 | 7.91 |
| 28.11 | 6.53 | 6.96 | 7.40 | 7.67 | 7.96 | 8.18 | 8.36 | 8.39 | 8.36 | 8.39 | 8.33 |

|        |      |      |      |      |      |      |       |       |       |       |       |
|--------|------|------|------|------|------|------|-------|-------|-------|-------|-------|
| 29.30  | 6.39 | 6.85 | 7.23 | 7.59 | 7.84 | 8.10 | 8.21  | 8.28  | 8.31  | 8.32  | 8.20  |
| 30.59  | 6.38 | 6.79 | 7.23 | 7.52 | 7.74 | 8.01 | 8.12  | 8.16  | 8.19  | 8.19  | 8.15  |
| 31.98  | 6.22 | 6.68 | 7.08 | 7.38 | 7.67 | 7.88 | 8.01  | 8.08  | 8.10  | 8.09  | 8.03  |
| 33.47  | 6.30 | 6.72 | 7.14 | 7.47 | 7.73 | 7.98 | 8.06  | 8.14  | 8.16  | 8.13  | 8.08  |
| 35.09  | 6.18 | 6.63 | 7.03 | 7.30 | 7.64 | 7.82 | 7.93  | 8.02  | 8.07  | 7.97  | 7.97  |
| 36.83  | 6.32 | 6.76 | 7.16 | 7.48 | 7.85 | 8.07 | 8.19  | 8.24  | 8.33  | 8.23  | 8.21  |
| 38.71  | 6.24 | 6.70 | 7.08 | 7.38 | 7.61 | 7.86 | 7.95  | 8.05  | 8.10  | 8.08  | 8.01  |
| 40.73  | 6.28 | 6.65 | 7.07 | 7.36 | 7.67 | 7.83 | 7.98  | 8.01  | 8.06  | 8.04  | 7.98  |
| 42.92  | 6.23 | 6.71 | 7.03 | 7.34 | 7.61 | 7.87 | 7.99  | 8.04  | 8.02  | 8.03  | 7.98  |
| 45.27  | 6.10 | 6.51 | 6.89 | 7.18 | 7.47 | 7.71 | 7.79  | 7.87  | 7.92  | 7.89  | 7.76  |
| 47.81  | 6.37 | 6.78 | 7.22 | 7.53 | 7.79 | 7.99 | 8.14  | 8.20  | 8.26  | 8.17  | 8.06  |
| 50.55  | 5.92 | 6.32 | 6.76 | 7.01 | 7.34 | 7.57 | 7.65  | 7.74  | 7.75  | 7.72  | 7.68  |
| 53.51  | 6.45 | 6.89 | 7.34 | 7.66 | 7.95 | 8.14 | 8.31  | 8.38  | 8.41  | 8.38  | 8.33  |
| 56.69  | 6.21 | 6.65 | 7.06 | 7.40 | 7.70 | 7.85 | 8.01  | 8.08  | 8.16  | 8.07  | 8.06  |
| 60.13  | 6.22 | 6.74 | 7.12 | 7.43 | 7.71 | 7.95 | 8.11  | 8.17  | 8.25  | 8.13  | 8.11  |
| 63.84  | 6.34 | 6.84 | 7.25 | 7.54 | 7.79 | 8.09 | 8.20  | 8.30  | 8.34  | 8.30  | 8.26  |
| 67.83  | 6.11 | 6.69 | 7.08 | 7.39 | 7.68 | 7.95 | 8.11  | 8.15  | 8.18  | 8.13  | 8.07  |
| 72.15  | 6.29 | 6.72 | 7.21 | 7.48 | 7.82 | 8.05 | 8.15  | 8.25  | 8.30  | 8.29  | 8.17  |
| 76.80  | 6.09 | 6.48 | 6.92 | 7.25 | 7.56 | 7.78 | 7.92  | 8.02  | 8.07  | 8.02  | 7.93  |
| 81.81  | 6.46 | 6.89 | 7.32 | 7.69 | 7.97 | 8.22 | 8.32  | 8.41  | 8.48  | 8.40  | 8.32  |
| 87.22  | 6.19 | 6.70 | 7.08 | 7.41 | 7.72 | 7.96 | 8.07  | 8.13  | 8.17  | 8.12  | 8.08  |
| 93.06  | 6.17 | 6.67 | 7.03 | 7.44 | 7.72 | 7.96 | 8.11  | 8.23  | 8.23  | 8.19  | 8.13  |
| 99.35  | 6.41 | 6.91 | 7.33 | 7.70 | 8.01 | 8.24 | 8.39  | 8.44  | 8.52  | 8.45  | 8.44  |
| 106.13 | 6.32 | 6.82 | 7.30 | 7.60 | 7.93 | 8.16 | 8.30  | 8.41  | 8.39  | 8.45  | 8.33  |
| 113.45 | 6.47 | 7.03 | 7.44 | 7.81 | 8.13 | 8.38 | 8.53  | 8.58  | 8.62  | 8.62  | 8.55  |
| 121.34 | 6.28 | 6.78 | 7.24 | 7.63 | 7.92 | 8.16 | 8.31  | 8.38  | 8.46  | 8.40  | 8.27  |
| 129.86 | 6.26 | 6.67 | 7.13 | 7.47 | 7.86 | 8.07 | 8.16  | 8.31  | 8.31  | 8.31  | 8.28  |
| 139.04 | 6.18 | 6.66 | 7.06 | 7.51 | 7.80 | 8.05 | 8.18  | 8.26  | 8.31  | 8.27  | 8.22  |
| 148.94 | 6.11 | 6.62 | 7.05 | 7.36 | 7.74 | 8.01 | 8.15  | 8.25  | 8.35  | 8.29  | 8.24  |
| 159.62 | 6.44 | 6.97 | 7.42 | 7.76 | 8.10 | 8.36 | 8.54  | 8.64  | 8.71  | 8.69  | 8.66  |
| 171.14 | 6.37 | 6.82 | 7.32 | 7.66 | 7.99 | 8.29 | 8.39  | 8.55  | 8.57  | 8.57  | 8.52  |
| 183.56 | 6.06 | 6.59 | 7.04 | 7.37 | 7.73 | 7.97 | 8.13  | 8.24  | 8.27  | 8.25  | 8.20  |
| 196.96 | 6.48 | 7.02 | 7.54 | 7.90 | 8.27 | 8.49 | 8.70  | 8.80  | 8.87  | 8.86  | 8.81  |
| 211.41 | 6.35 | 6.90 | 7.36 | 7.78 | 8.09 | 8.35 | 8.51  | 8.63  | 8.66  | 8.65  | 8.57  |
| 226.99 | 6.58 | 7.12 | 7.61 | 7.94 | 8.32 | 8.60 | 8.76  | 8.93  | 8.92  | 8.91  | 8.85  |
| 243.80 | 6.16 | 6.67 | 7.16 | 7.52 | 7.83 | 8.15 | 8.31  | 8.38  | 8.46  | 8.41  | 8.39  |
| 261.93 | 6.56 | 7.14 | 7.64 | 8.04 | 8.40 | 8.62 | 8.85  | 8.98  | 9.00  | 9.00  | 8.95  |
| 281.48 | 6.71 | 7.22 | 7.77 | 8.12 | 8.48 | 8.82 | 9.01  | 9.14  | 9.22  | 9.19  | 9.13  |
| 302.56 | 6.51 | 7.05 | 7.56 | 7.98 | 8.29 | 8.61 | 8.79  | 8.96  | 9.02  | 8.95  | 8.92  |
| 325.30 | 6.75 | 7.35 | 7.72 | 8.17 | 8.54 | 8.85 | 9.07  | 9.15  | 9.25  | 9.23  | 9.18  |
| 349.83 | 6.55 | 7.15 | 7.67 | 8.05 | 8.49 | 8.68 | 8.95  | 9.04  | 9.14  | 9.08  | 9.09  |
| 376.28 | 6.81 | 7.37 | 7.85 | 8.30 | 8.66 | 8.97 | 9.16  | 9.35  | 9.47  | 9.45  | 9.38  |
| 404.81 | 6.98 | 7.46 | 7.97 | 8.38 | 8.77 | 9.06 | 9.28  | 9.44  | 9.46  | 9.47  | 9.47  |
| 435.58 | 6.77 | 7.39 | 7.85 | 8.32 | 8.70 | 9.03 | 9.22  | 9.40  | 9.48  | 9.48  | 9.42  |
| 468.76 | 6.90 | 7.50 | 8.03 | 8.43 | 8.82 | 9.15 | 9.32  | 9.47  | 9.53  | 9.58  | 9.55  |
| 504.55 | 6.83 | 7.37 | 7.91 | 8.36 | 8.75 | 9.06 | 9.29  | 9.44  | 9.52  | 9.50  | 9.49  |
| 543.15 | 6.96 | 7.54 | 8.07 | 8.59 | 8.93 | 9.30 | 9.52  | 9.67  | 9.82  | 9.79  | 9.80  |
| 584.78 | 6.91 | 7.48 | 7.98 | 8.48 | 8.91 | 9.16 | 9.40  | 9.57  | 9.66  | 9.70  | 9.67  |
| 629.68 | 6.85 | 7.47 | 7.99 | 8.41 | 8.81 | 9.11 | 9.37  | 9.54  | 9.62  | 9.61  | 9.62  |
| 678.10 | 7.33 | 7.97 | 8.50 | 9.01 | 9.41 | 9.78 | 10.02 | 10.14 | 10.25 | 10.36 | 10.34 |

|         |      |      |       |       |       |       |       |       |       |       |       |
|---------|------|------|-------|-------|-------|-------|-------|-------|-------|-------|-------|
| 730.33  | 7.56 | 8.13 | 8.70  | 9.20  | 9.62  | 10.01 | 10.25 | 10.45 | 10.55 | 10.57 | 10.57 |
| 786.65  | 7.42 | 8.11 | 8.63  | 9.17  | 9.56  | 10.00 | 10.22 | 10.38 | 10.52 | 10.54 | 10.52 |
| 847.40  | 7.55 | 8.17 | 8.75  | 9.25  | 9.71  | 10.11 | 10.38 | 10.59 | 10.69 | 10.69 | 10.73 |
| 912.92  | 7.70 | 8.37 | 8.94  | 9.45  | 9.92  | 10.30 | 10.60 | 10.73 | 10.88 | 10.90 | 10.89 |
| 983.58  | 7.81 | 8.48 | 9.07  | 9.59  | 10.06 | 10.46 | 10.72 | 10.91 | 11.07 | 11.11 | 11.12 |
| 1059.78 | 8.01 | 8.59 | 9.23  | 9.68  | 10.16 | 10.57 | 10.86 | 11.09 | 11.25 | 11.29 | 11.26 |
| 1141.98 | 7.88 | 8.52 | 9.06  | 9.63  | 10.13 | 10.49 | 10.80 | 10.98 | 11.19 | 11.21 | 11.28 |
| 1230.62 | 7.59 | 8.25 | 8.81  | 9.35  | 9.75  | 10.13 | 10.45 | 10.63 | 10.79 | 10.82 | 10.84 |
| 1326.23 | 8.02 | 8.74 | 9.31  | 9.88  | 10.29 | 10.73 | 11.02 | 11.27 | 11.41 | 11.50 | 11.51 |
| 1429.34 | 8.49 | 9.19 | 9.78  | 10.36 | 10.90 | 11.32 | 11.60 | 11.86 | 12.02 | 12.07 | 12.15 |
| 1540.54 | 8.39 | 9.05 | 9.66  | 10.25 | 10.75 | 11.21 | 11.50 | 11.70 | 11.86 | 11.94 | 11.97 |
| 1660.48 | 8.46 | 9.20 | 9.87  | 10.38 | 10.89 | 11.30 | 11.63 | 11.87 | 12.08 | 12.15 | 12.22 |
| 1789.83 | 8.53 | 9.16 | 9.85  | 10.44 | 10.97 | 11.34 | 11.65 | 11.93 | 12.11 | 12.15 | 12.19 |
| 1929.34 | 8.72 | 9.42 | 10.04 | 10.58 | 11.18 | 11.59 | 11.89 | 12.18 | 12.36 | 12.45 | 12.48 |
| 2079.80 | 8.62 | 9.27 | 9.96  | 10.51 | 11.00 | 11.49 | 11.76 | 12.08 | 12.21 | 12.35 | 12.39 |
| 2242.08 | 8.69 | 9.38 | 10.05 | 10.60 | 11.16 | 11.59 | 11.88 | 12.17 | 12.36 | 12.41 | 12.50 |
| 2417.10 | 8.75 | 9.47 | 10.11 | 10.64 | 11.21 | 11.68 | 12.01 | 12.22 | 12.41 | 12.53 | 12.57 |
| 2605.85 | 8.67 | 9.38 | 9.99  | 10.56 | 11.13 | 11.59 | 11.94 | 12.16 | 12.32 | 12.44 | 12.44 |
| 2809.43 | 8.28 | 8.95 | 9.61  | 10.09 | 10.59 | 11.02 | 11.38 | 11.59 | 11.80 | 11.91 | 11.95 |
| 3028.99 | 8.61 | 9.36 | 10.02 | 10.53 | 11.06 | 11.50 | 11.90 | 12.15 | 12.37 | 12.48 | 12.51 |
| 3265.79 | 8.72 | 9.45 | 9.97  | 10.61 | 11.14 | 11.59 | 11.85 | 12.18 | 12.37 | 12.44 | 12.60 |
| 3521.18 | 8.65 | 9.29 | 9.99  | 10.51 | 11.08 | 11.49 | 11.80 | 12.09 | 12.30 | 12.46 | 12.49 |
| 3796.62 | 8.38 | 9.01 | 9.66  | 10.18 | 10.75 | 11.16 | 11.46 | 11.77 | 11.97 | 12.10 | 12.10 |

| Wavelength (nm) \ Time (ps) | 568.61 | 570.02 | 571.43 | 572.83 | 574.24 | 575.65 | 577.06 | 578.47 | 579.88 | 581.29 | 582.69 |
|-----------------------------|--------|--------|--------|--------|--------|--------|--------|--------|--------|--------|--------|
| -3.28                       | -0.04  | -0.06  | -0.07  | -0.07  | -0.05  | -0.04  | -0.04  | -0.03  | -0.04  | -0.01  | 0.00   |
| -2.78                       | -0.07  | -0.08  | -0.08  | -0.11  | -0.08  | -0.07  | -0.07  | -0.06  | -0.03  | -0.04  | -0.05  |
| -2.28                       | -0.06  | -0.06  | -0.02  | -0.04  | -0.06  | -0.07  | -0.08  | -0.07  | -0.05  | -0.05  | -0.04  |
| -1.78                       | 0.20   | 0.19   | 0.21   | 0.18   | 0.22   | 0.21   | 0.19   | 0.16   | 0.14   | 0.16   | 0.14   |
| -1.28                       | -0.04  | -0.05  | 0.01   | -0.02  | -0.03  | -0.04  | -0.03  | -0.02  | -0.01  | -0.06  | -0.07  |
| -0.78                       | -0.12  | -0.06  | -0.09  | -0.11  | -0.13  | -0.08  | -0.10  | -0.04  | -0.07  | -0.05  | 0.01   |
| -0.28                       | 0.06   | 0.08   | 0.03   | 0.05   | 0.04   | 0.08   | 0.07   | 0.04   | 0.02   | 0.04   | 0.04   |
| 0.22                        | 0.08   | 0.04   | 0.04   | 0.13   | 0.10   | 0.06   | 0.09   | 0.07   | 0.07   | 0.06   | 0.00   |
| 0.32                        | -0.06  | -0.06  | -0.02  | -0.06  | -0.05  | -0.09  | -0.02  | -0.05  | -0.06  | -0.01  | -0.01  |
| 0.42                        | 0.06   | 0.04   | -0.01  | 0.05   | 0.03   | 0.02   | -0.01  | -0.01  | 0.04   | -0.03  | -0.02  |
| 0.52                        | -0.01  | -0.05  | -0.01  | -0.03  | -0.01  | -0.02  | -0.03  | -0.02  | -0.05  | 0.03   | 0.00   |
| 0.62                        | 0.08   | 0.05   | 0.07   | 0.07   | 0.06   | 0.04   | 0.01   | 0.04   | 0.06   | 0.03   | 0.04   |
| 0.72                        | 0.11   | 0.06   | 0.10   | 0.06   | 0.03   | 0.05   | 0.08   | 0.01   | 0.05   | 0.01   | -0.03  |
| 0.77                        | 0.07   | 0.04   | 0.03   | 0.06   | 0.07   | 0.05   | 0.02   | -0.01  | 0.05   | 0.03   | 0.01   |
| 0.82                        | 0.02   | 0.00   | 0.00   | 0.02   | 0.01   | 0.05   | -0.01  | -0.03  | 0.03   | -0.03  | 0.02   |
| 0.87                        | 0.04   | 0.02   | 0.05   | 0.10   | 0.04   | 0.06   | 0.08   | 0.04   | 0.07   | 0.06   | 0.07   |
| 0.92                        | -0.13  | -0.11  | -0.08  | -0.06  | -0.08  | -0.07  | -0.10  | -0.10  | -0.08  | -0.11  | -0.14  |
| 0.97                        | 0.05   | 0.03   | 0.04   | 0.00   | 0.05   | 0.09   | 0.05   | 0.06   | 0.08   | 0.04   | 0.04   |
| 1.02                        | -0.15  | -0.13  | -0.12  | -0.09  | -0.08  | -0.13  | -0.09  | -0.06  | -0.09  | -0.09  | -0.06  |
| 1.07                        | 0.13   | 0.11   | 0.14   | 0.11   | 0.13   | 0.11   | 0.09   | 0.09   | 0.08   | 0.06   | 0.09   |
| 1.12                        | -0.15  | -0.19  | -0.15  | -0.20  | -0.18  | -0.15  | -0.18  | -0.12  | -0.21  | -0.18  | -0.16  |
| 1.17                        | -0.09  | -0.15  | -0.10  | -0.16  | -0.14  | -0.15  | -0.12  | -0.06  | -0.09  | -0.09  | -0.08  |
| 1.22                        | -0.11  | -0.09  | -0.05  | -0.07  | -0.08  | -0.10  | -0.12  | -0.14  | -0.08  | -0.08  | -0.08  |

|      |       |       |       |       |       |       |       |       |       |       |       |
|------|-------|-------|-------|-------|-------|-------|-------|-------|-------|-------|-------|
| 1.27 | 0.12  | 0.08  | 0.06  | 0.12  | 0.09  | 0.15  | 0.09  | 0.10  | 0.08  | 0.04  | 0.07  |
| 1.32 | 0.08  | 0.08  | 0.08  | 0.03  | 0.02  | 0.06  | 0.08  | 0.07  | 0.07  | 0.03  | 0.05  |
| 1.37 | -0.03 | -0.04 | -0.09 | -0.09 | -0.06 | -0.04 | 0.02  | -0.01 | -0.02 | -0.02 | -0.01 |
| 1.42 | -0.05 | -0.12 | -0.07 | -0.10 | -0.04 | -0.04 | -0.04 | -0.10 | -0.09 | -0.02 | -0.07 |
| 1.47 | -0.28 | -0.27 | -0.26 | -0.31 | -0.23 | -0.25 | -0.20 | -0.18 | -0.19 | -0.16 | -0.17 |
| 1.52 | 0.90  | 0.76  | 0.68  | 0.57  | 0.44  | 0.39  | 0.28  | 0.29  | 0.19  | 0.13  | 0.14  |
| 1.57 | 5.45  | 5.20  | 5.02  | 4.74  | 4.55  | 4.28  | 4.00  | 3.75  | 3.58  | 3.35  | 3.14  |
| 1.62 | 9.00  | 9.04  | 9.06  | 9.03  | 8.98  | 8.88  | 8.77  | 8.60  | 8.40  | 8.24  | 8.10  |
| 1.67 | 9.37  | 9.57  | 9.79  | 9.94  | 10.05 | 10.16 | 10.21 | 10.27 | 10.31 | 10.35 | 10.29 |
| 1.72 | 8.46  | 8.73  | 8.97  | 9.17  | 9.32  | 9.43  | 9.58  | 9.63  | 9.69  | 9.72  | 9.80  |
| 1.77 | 7.83  | 7.96  | 8.19  | 8.41  | 8.53  | 8.63  | 8.77  | 8.82  | 8.91  | 8.92  | 8.90  |
| 1.82 | 7.04  | 7.26  | 7.38  | 7.55  | 7.67  | 7.80  | 7.95  | 7.91  | 7.98  | 8.04  | 8.07  |
| 1.87 | 6.78  | 6.96  | 7.14  | 7.31  | 7.42  | 7.54  | 7.61  | 7.69  | 7.70  | 7.70  | 7.68  |
| 1.92 | 6.84  | 7.01  | 7.22  | 7.34  | 7.44  | 7.53  | 7.67  | 7.66  | 7.74  | 7.73  | 7.69  |
| 1.97 | 6.91  | 7.02  | 7.21  | 7.36  | 7.53  | 7.59  | 7.66  | 7.68  | 7.79  | 7.75  | 7.76  |
| 2.02 | 7.07  | 7.14  | 7.34  | 7.45  | 7.61  | 7.66  | 7.71  | 7.79  | 7.79  | 7.78  | 7.81  |
| 2.07 | 6.98  | 7.09  | 7.27  | 7.40  | 7.52  | 7.56  | 7.67  | 7.73  | 7.75  | 7.75  | 7.76  |
| 2.12 | 7.61  | 7.69  | 7.87  | 7.97  | 8.05  | 8.14  | 8.17  | 8.24  | 8.27  | 8.24  | 8.17  |
| 2.17 | 7.35  | 7.46  | 7.58  | 7.69  | 7.77  | 7.80  | 7.91  | 7.90  | 7.88  | 7.88  | 7.89  |
| 2.22 | 7.34  | 7.47  | 7.56  | 7.65  | 7.73  | 7.83  | 7.87  | 7.86  | 7.86  | 7.85  | 7.81  |
| 2.27 | 7.36  | 7.45  | 7.62  | 7.69  | 7.79  | 7.80  | 7.88  | 7.89  | 7.92  | 7.90  | 7.81  |
| 2.32 | 7.27  | 7.40  | 7.51  | 7.60  | 7.66  | 7.67  | 7.73  | 7.72  | 7.73  | 7.75  | 7.69  |
| 2.37 | 7.53  | 7.59  | 7.69  | 7.78  | 7.87  | 7.90  | 7.93  | 7.97  | 7.96  | 7.93  | 7.95  |
| 2.42 | 7.59  | 7.63  | 7.82  | 7.86  | 7.92  | 7.95  | 7.97  | 7.97  | 8.01  | 7.95  | 7.91  |
| 2.47 | 7.34  | 7.42  | 7.49  | 7.58  | 7.58  | 7.68  | 7.68  | 7.64  | 7.63  | 7.62  | 7.58  |
| 2.52 | 7.62  | 7.72  | 7.79  | 7.89  | 7.90  | 7.95  | 7.94  | 7.95  | 7.95  | 7.94  | 7.87  |
| 2.57 | 7.38  | 7.43  | 7.53  | 7.61  | 7.66  | 7.67  | 7.70  | 7.69  | 7.71  | 7.70  | 7.69  |
| 2.62 | 7.64  | 7.71  | 7.76  | 7.79  | 7.79  | 7.83  | 7.86  | 7.88  | 7.84  | 7.83  | 7.74  |
| 2.67 | 7.24  | 7.32  | 7.42  | 7.45  | 7.50  | 7.50  | 7.53  | 7.54  | 7.50  | 7.50  | 7.44  |
| 2.72 | 7.65  | 7.69  | 7.76  | 7.80  | 7.81  | 7.85  | 7.85  | 7.80  | 7.81  | 7.81  | 7.68  |
| 2.77 | 7.93  | 7.96  | 8.02  | 8.04  | 8.07  | 8.04  | 8.06  | 8.00  | 7.99  | 7.99  | 7.92  |
| 2.82 | 7.69  | 7.72  | 7.77  | 7.80  | 7.92  | 7.81  | 7.86  | 7.79  | 7.76  | 7.73  | 7.69  |
| 2.87 | 7.63  | 7.67  | 7.76  | 7.78  | 7.75  | 7.78  | 7.76  | 7.76  | 7.73  | 7.70  | 7.65  |
| 2.92 | 7.77  | 7.75  | 7.81  | 7.79  | 7.85  | 7.87  | 7.87  | 7.82  | 7.78  | 7.77  | 7.70  |
| 2.97 | 7.74  | 7.70  | 7.78  | 7.82  | 7.86  | 7.83  | 7.82  | 7.84  | 7.78  | 7.74  | 7.69  |
| 3.02 | 8.06  | 8.09  | 8.15  | 8.16  | 8.14  | 8.13  | 8.13  | 8.09  | 8.02  | 7.97  | 7.91  |
| 3.07 | 7.99  | 8.01  | 8.02  | 8.04  | 8.00  | 7.98  | 8.02  | 7.98  | 7.94  | 7.89  | 7.83  |
| 3.12 | 8.20  | 8.19  | 8.22  | 8.28  | 8.27  | 8.26  | 8.23  | 8.14  | 8.14  | 8.09  | 8.01  |
| 3.17 | 8.22  | 8.25  | 8.29  | 8.26  | 8.27  | 8.25  | 8.24  | 8.18  | 8.13  | 8.08  | 8.01  |
| 3.22 | 8.15  | 8.15  | 8.20  | 8.19  | 8.18  | 8.20  | 8.12  | 8.10  | 8.04  | 7.95  | 7.88  |
| 3.27 | 8.06  | 7.97  | 7.98  | 8.00  | 8.02  | 7.99  | 7.97  | 7.89  | 7.84  | 7.79  | 7.73  |
| 3.32 | 8.42  | 8.39  | 8.46  | 8.45  | 8.38  | 8.37  | 8.36  | 8.25  | 8.17  | 8.14  | 8.04  |
| 3.37 | 7.94  | 7.94  | 7.93  | 7.91  | 7.86  | 7.87  | 7.88  | 7.80  | 7.76  | 7.71  | 7.66  |
| 3.42 | 8.26  | 8.26  | 8.31  | 8.27  | 8.27  | 8.21  | 8.20  | 8.08  | 8.07  | 8.01  | 7.90  |
| 3.47 | 8.29  | 8.20  | 8.23  | 8.25  | 8.23  | 8.18  | 8.17  | 8.08  | 8.06  | 7.99  | 7.95  |
| 3.52 | 8.00  | 8.01  | 8.05  | 8.04  | 8.00  | 7.96  | 7.97  | 7.86  | 7.85  | 7.80  | 7.67  |
| 3.57 | 7.85  | 7.89  | 7.89  | 7.88  | 7.82  | 7.75  | 7.74  | 7.69  | 7.62  | 7.56  | 7.46  |
| 3.62 | 8.22  | 8.14  | 8.14  | 8.14  | 8.06  | 8.05  | 7.98  | 7.91  | 7.85  | 7.73  | 7.65  |
| 3.67 | 7.96  | 7.97  | 7.93  | 7.92  | 7.91  | 7.87  | 7.77  | 7.70  | 7.66  | 7.61  | 7.53  |
| 3.72 | 8.17  | 8.10  | 8.10  | 8.05  | 8.09  | 8.02  | 7.93  | 7.88  | 7.83  | 7.74  | 7.61  |

|       |      |      |      |      |      |      |      |      |      |      |      |
|-------|------|------|------|------|------|------|------|------|------|------|------|
| 3.92  | 8.65 | 8.59 | 8.58 | 8.54 | 8.52 | 8.43 | 8.39 | 8.33 | 8.20 | 8.14 | 8.00 |
| 4.12  | 8.30 | 8.26 | 8.21 | 8.21 | 8.13 | 8.06 | 8.01 | 7.89 | 7.84 | 7.79 | 7.66 |
| 4.32  | 8.17 | 8.10 | 8.09 | 8.03 | 7.95 | 7.88 | 7.89 | 7.71 | 7.64 | 7.54 | 7.41 |
| 4.52  | 8.39 | 8.27 | 8.25 | 8.19 | 8.12 | 8.02 | 7.96 | 7.84 | 7.81 | 7.69 | 7.56 |
| 4.72  | 8.24 | 8.22 | 8.14 | 8.15 | 8.04 | 7.96 | 7.93 | 7.80 | 7.71 | 7.58 | 7.46 |
| 4.92  | 8.66 | 8.62 | 8.54 | 8.53 | 8.46 | 8.35 | 8.23 | 8.11 | 8.02 | 7.90 | 7.76 |
| 5.12  | 8.41 | 8.41 | 8.32 | 8.27 | 8.17 | 8.05 | 7.97 | 7.85 | 7.73 | 7.62 | 7.51 |
| 5.32  | 8.74 | 8.67 | 8.63 | 8.53 | 8.41 | 8.27 | 8.19 | 8.07 | 7.98 | 7.81 | 7.65 |
| 5.52  | 8.70 | 8.66 | 8.50 | 8.44 | 8.39 | 8.29 | 8.16 | 8.03 | 7.90 | 7.81 | 7.64 |
| 5.72  | 8.85 | 8.77 | 8.67 | 8.62 | 8.48 | 8.41 | 8.24 | 8.11 | 8.01 | 7.89 | 7.71 |
| 5.92  | 8.54 | 8.48 | 8.42 | 8.29 | 8.17 | 8.11 | 8.00 | 7.89 | 7.74 | 7.62 | 7.51 |
| 6.12  | 8.68 | 8.55 | 8.51 | 8.42 | 8.33 | 8.16 | 8.07 | 7.95 | 7.78 | 7.69 | 7.55 |
| 6.32  | 8.44 | 8.38 | 8.27 | 8.20 | 8.08 | 8.01 | 7.85 | 7.74 | 7.63 | 7.52 | 7.34 |
| 6.52  | 8.46 | 8.40 | 8.34 | 8.22 | 8.14 | 7.96 | 7.88 | 7.76 | 7.65 | 7.51 | 7.36 |
| 6.72  | 8.99 | 8.87 | 8.82 | 8.69 | 8.57 | 8.45 | 8.36 | 8.17 | 8.04 | 7.91 | 7.69 |
| 6.92  | 8.58 | 8.46 | 8.35 | 8.30 | 8.17 | 8.03 | 7.92 | 7.75 | 7.65 | 7.51 | 7.37 |
| 7.12  | 8.46 | 8.37 | 8.29 | 8.21 | 8.08 | 7.96 | 7.84 | 7.72 | 7.60 | 7.44 | 7.25 |
| 7.32  | 8.78 | 8.71 | 8.62 | 8.50 | 8.43 | 8.25 | 8.15 | 8.00 | 7.82 | 7.70 | 7.54 |
| 7.52  | 8.61 | 8.53 | 8.40 | 8.32 | 8.21 | 8.04 | 7.89 | 7.73 | 7.66 | 7.51 | 7.32 |
| 7.72  | 8.60 | 8.51 | 8.40 | 8.30 | 8.21 | 8.08 | 7.92 | 7.80 | 7.63 | 7.53 | 7.41 |
| 7.92  | 8.55 | 8.41 | 8.31 | 8.22 | 8.08 | 7.94 | 7.83 | 7.65 | 7.55 | 7.38 | 7.24 |
| 8.12  | 8.64 | 8.51 | 8.44 | 8.32 | 8.21 | 8.03 | 7.90 | 7.78 | 7.64 | 7.48 | 7.33 |
| 8.32  | 8.56 | 8.47 | 8.38 | 8.24 | 8.11 | 7.97 | 7.86 | 7.65 | 7.56 | 7.40 | 7.24 |
| 8.52  | 8.33 | 8.22 | 8.16 | 8.01 | 7.89 | 7.81 | 7.68 | 7.54 | 7.41 | 7.25 | 7.07 |
| 8.72  | 8.65 | 8.54 | 8.44 | 8.35 | 8.20 | 8.08 | 7.97 | 7.82 | 7.66 | 7.54 | 7.36 |
| 8.92  | 8.42 | 8.26 | 8.19 | 8.12 | 7.95 | 7.86 | 7.74 | 7.57 | 7.44 | 7.30 | 7.17 |
| 9.12  | 8.65 | 8.54 | 8.44 | 8.33 | 8.22 | 8.04 | 7.93 | 7.76 | 7.60 | 7.43 | 7.29 |
| 9.32  | 8.14 | 8.02 | 7.92 | 7.84 | 7.74 | 7.61 | 7.47 | 7.28 | 7.11 | 6.98 | 6.87 |
| 9.52  | 8.54 | 8.44 | 8.37 | 8.23 | 8.13 | 7.96 | 7.84 | 7.67 | 7.55 | 7.41 | 7.18 |
| 9.72  | 8.42 | 8.34 | 8.22 | 8.08 | 7.96 | 7.82 | 7.70 | 7.55 | 7.37 | 7.22 | 7.06 |
| 9.92  | 8.48 | 8.34 | 8.23 | 8.11 | 8.00 | 7.87 | 7.73 | 7.54 | 7.39 | 7.23 | 7.10 |
| 10.12 | 8.70 | 8.55 | 8.47 | 8.35 | 8.20 | 8.04 | 7.90 | 7.76 | 7.63 | 7.46 | 7.30 |
| 10.32 | 8.05 | 7.93 | 7.84 | 7.71 | 7.58 | 7.44 | 7.33 | 7.18 | 7.07 | 6.91 | 6.75 |
| 10.52 | 8.32 | 8.20 | 8.11 | 7.97 | 7.86 | 7.74 | 7.63 | 7.45 | 7.31 | 7.20 | 7.00 |
| 10.72 | 8.53 | 8.45 | 8.29 | 8.17 | 8.00 | 7.88 | 7.69 | 7.59 | 7.45 | 7.26 | 7.11 |
| 10.92 | 8.32 | 8.19 | 8.15 | 8.06 | 7.89 | 7.66 | 7.60 | 7.44 | 7.28 | 7.12 | 6.96 |
| 11.12 | 8.28 | 8.17 | 8.08 | 7.95 | 7.77 | 7.65 | 7.51 | 7.35 | 7.23 | 7.07 | 6.96 |
| 11.32 | 8.53 | 8.39 | 8.26 | 8.15 | 8.00 | 7.84 | 7.68 | 7.56 | 7.36 | 7.23 | 7.06 |
| 11.52 | 8.19 | 8.07 | 7.97 | 7.84 | 7.70 | 7.53 | 7.41 | 7.28 | 7.11 | 6.98 | 6.84 |
| 11.72 | 8.16 | 8.09 | 8.00 | 7.88 | 7.74 | 7.55 | 7.46 | 7.32 | 7.14 | 7.01 | 6.85 |
| 11.92 | 8.20 | 8.10 | 8.03 | 7.83 | 7.70 | 7.54 | 7.39 | 7.25 | 7.13 | 7.03 | 6.87 |
| 12.12 | 8.54 | 8.44 | 8.34 | 8.18 | 8.04 | 7.88 | 7.74 | 7.61 | 7.44 | 7.24 | 7.11 |
| 12.32 | 8.39 | 8.31 | 8.15 | 8.03 | 7.86 | 7.72 | 7.57 | 7.39 | 7.28 | 7.10 | 6.92 |
| 12.52 | 8.15 | 8.04 | 7.92 | 7.71 | 7.64 | 7.44 | 7.33 | 7.16 | 7.02 | 6.87 | 6.69 |
| 12.72 | 8.20 | 8.06 | 7.97 | 7.85 | 7.69 | 7.60 | 7.37 | 7.21 | 7.07 | 6.91 | 6.75 |
| 12.92 | 8.35 | 8.26 | 8.12 | 7.94 | 7.84 | 7.71 | 7.56 | 7.37 | 7.17 | 7.04 | 6.87 |
| 13.12 | 8.04 | 7.95 | 7.82 | 7.64 | 7.53 | 7.42 | 7.27 | 7.10 | 6.97 | 6.83 | 6.66 |
| 13.32 | 8.35 | 8.25 | 8.12 | 7.98 | 7.88 | 7.70 | 7.63 | 7.42 | 7.27 | 7.11 | 6.98 |
| 13.52 | 7.99 | 7.89 | 7.73 | 7.62 | 7.47 | 7.33 | 7.21 | 7.04 | 6.85 | 6.73 | 6.58 |
| 13.72 | 8.43 | 8.34 | 8.21 | 8.03 | 7.89 | 7.71 | 7.63 | 7.40 | 7.24 | 7.07 | 6.92 |

|       |      |      |      |      |      |      |      |      |      |      |      |
|-------|------|------|------|------|------|------|------|------|------|------|------|
| 13.92 | 8.11 | 7.92 | 7.80 | 7.70 | 7.56 | 7.40 | 7.27 | 7.13 | 6.99 | 6.83 | 6.67 |
| 14.00 | 8.47 | 8.37 | 8.22 | 8.10 | 7.93 | 7.76 | 7.59 | 7.43 | 7.28 | 7.12 | 6.93 |
| 14.08 | 8.22 | 8.10 | 8.01 | 7.89 | 7.70 | 7.59 | 7.42 | 7.25 | 7.08 | 6.93 | 6.78 |
| 14.17 | 8.09 | 7.95 | 7.89 | 7.72 | 7.55 | 7.40 | 7.28 | 7.13 | 6.99 | 6.83 | 6.66 |
| 14.27 | 8.04 | 7.92 | 7.84 | 7.68 | 7.55 | 7.40 | 7.25 | 7.07 | 6.98 | 6.83 | 6.66 |
| 14.38 | 8.18 | 8.05 | 7.96 | 7.75 | 7.66 | 7.51 | 7.35 | 7.19 | 7.05 | 6.86 | 6.73 |
| 14.49 | 7.95 | 7.78 | 7.70 | 7.55 | 7.38 | 7.30 | 7.13 | 7.00 | 6.81 | 6.67 | 6.48 |
| 14.61 | 8.10 | 7.93 | 7.85 | 7.69 | 7.53 | 7.36 | 7.22 | 7.07 | 6.97 | 6.81 | 6.66 |
| 14.75 | 8.03 | 7.90 | 7.83 | 7.62 | 7.55 | 7.32 | 7.27 | 7.07 | 6.98 | 6.79 | 6.57 |
| 14.89 | 8.67 | 8.56 | 8.40 | 8.25 | 8.11 | 7.98 | 7.79 | 7.62 | 7.42 | 7.24 | 7.04 |
| 15.05 | 7.99 | 7.96 | 7.83 | 7.67 | 7.47 | 7.30 | 7.23 | 7.01 | 6.87 | 6.72 | 6.65 |
| 15.21 | 8.28 | 8.15 | 8.02 | 7.87 | 7.70 | 7.55 | 7.42 | 7.22 | 7.05 | 6.90 | 6.71 |
| 15.39 | 7.90 | 7.78 | 7.65 | 7.57 | 7.37 | 7.21 | 7.10 | 6.92 | 6.83 | 6.62 | 6.45 |
| 15.59 | 8.13 | 8.04 | 7.89 | 7.74 | 7.63 | 7.42 | 7.28 | 7.14 | 7.01 | 6.88 | 6.69 |
| 15.80 | 8.38 | 8.23 | 8.12 | 7.99 | 7.84 | 7.70 | 7.51 | 7.36 | 7.21 | 7.06 | 6.85 |
| 16.02 | 7.86 | 7.74 | 7.63 | 7.50 | 7.36 | 7.19 | 7.04 | 6.91 | 6.72 | 6.59 | 6.44 |
| 16.27 | 8.49 | 8.30 | 8.19 | 8.01 | 7.89 | 7.72 | 7.57 | 7.38 | 7.21 | 7.06 | 6.88 |
| 16.53 | 8.06 | 7.96 | 7.83 | 7.69 | 7.52 | 7.38 | 7.22 | 7.08 | 6.90 | 6.75 | 6.61 |
| 16.81 | 7.85 | 7.77 | 7.66 | 7.53 | 7.33 | 7.21 | 7.09 | 6.88 | 6.77 | 6.62 | 6.45 |
| 17.12 | 8.34 | 8.16 | 8.04 | 7.86 | 7.69 | 7.57 | 7.38 | 7.21 | 7.10 | 6.85 | 6.75 |
| 17.45 | 7.87 | 7.77 | 7.60 | 7.50 | 7.35 | 7.17 | 7.04 | 6.85 | 6.73 | 6.56 | 6.47 |
| 17.81 | 8.37 | 8.23 | 8.14 | 7.95 | 7.81 | 7.68 | 7.51 | 7.31 | 7.16 | 6.98 | 6.82 |
| 18.19 | 8.40 | 8.28 | 8.15 | 8.03 | 7.80 | 7.67 | 7.51 | 7.29 | 7.15 | 6.93 | 6.81 |
| 18.60 | 8.34 | 8.14 | 8.02 | 7.88 | 7.71 | 7.54 | 7.39 | 7.24 | 7.02 | 6.89 | 6.72 |
| 19.05 | 8.27 | 8.13 | 8.00 | 7.84 | 7.65 | 7.50 | 7.36 | 7.15 | 7.00 | 6.85 | 6.66 |
| 19.53 | 8.15 | 7.96 | 7.87 | 7.70 | 7.52 | 7.40 | 7.21 | 7.00 | 6.89 | 6.75 | 6.61 |
| 20.05 | 8.14 | 7.94 | 7.86 | 7.68 | 7.55 | 7.34 | 7.22 | 6.98 | 6.89 | 6.72 | 6.55 |
| 20.61 | 8.11 | 7.99 | 7.89 | 7.69 | 7.52 | 7.37 | 7.20 | 7.07 | 6.92 | 6.72 | 6.58 |
| 21.22 | 8.03 | 7.87 | 7.78 | 7.59 | 7.38 | 7.23 | 7.14 | 6.90 | 6.78 | 6.59 | 6.43 |
| 21.87 | 8.15 | 8.01 | 7.88 | 7.68 | 7.57 | 7.37 | 7.20 | 7.04 | 6.85 | 6.71 | 6.60 |
| 22.57 | 8.08 | 7.92 | 7.77 | 7.63 | 7.48 | 7.29 | 7.13 | 6.93 | 6.79 | 6.63 | 6.45 |
| 23.33 | 8.20 | 8.08 | 7.93 | 7.75 | 7.61 | 7.42 | 7.25 | 7.11 | 6.92 | 6.77 | 6.59 |
| 24.15 | 7.89 | 7.76 | 7.67 | 7.50 | 7.36 | 7.16 | 6.99 | 6.81 | 6.70 | 6.45 | 6.34 |
| 25.03 | 7.93 | 7.76 | 7.67 | 7.52 | 7.31 | 7.14 | 7.02 | 6.81 | 6.66 | 6.49 | 6.33 |
| 25.98 | 8.34 | 8.17 | 8.00 | 7.86 | 7.71 | 7.52 | 7.36 | 7.19 | 7.01 | 6.86 | 6.66 |
| 27.01 | 7.85 | 7.69 | 7.59 | 7.39 | 7.27 | 7.07 | 6.92 | 6.74 | 6.60 | 6.41 | 6.24 |
| 28.11 | 8.27 | 8.05 | 7.95 | 7.76 | 7.57 | 7.43 | 7.26 | 7.07 | 6.85 | 6.72 | 6.57 |
| 29.30 | 8.12 | 7.96 | 7.81 | 7.63 | 7.49 | 7.27 | 7.16 | 6.95 | 6.78 | 6.65 | 6.44 |
| 30.59 | 8.07 | 7.86 | 7.72 | 7.57 | 7.42 | 7.22 | 7.07 | 6.86 | 6.68 | 6.56 | 6.37 |
| 31.98 | 7.91 | 7.76 | 7.61 | 7.50 | 7.24 | 7.11 | 6.92 | 6.76 | 6.61 | 6.44 | 6.25 |
| 33.47 | 8.00 | 7.85 | 7.63 | 7.47 | 7.34 | 7.16 | 6.99 | 6.86 | 6.65 | 6.49 | 6.31 |
| 35.09 | 7.87 | 7.69 | 7.57 | 7.35 | 7.25 | 7.07 | 6.91 | 6.70 | 6.57 | 6.42 | 6.21 |
| 36.83 | 8.11 | 7.93 | 7.80 | 7.59 | 7.44 | 7.27 | 7.07 | 6.95 | 6.78 | 6.59 | 6.46 |
| 38.71 | 7.92 | 7.74 | 7.61 | 7.42 | 7.25 | 7.05 | 6.88 | 6.70 | 6.51 | 6.36 | 6.20 |
| 40.73 | 7.89 | 7.75 | 7.59 | 7.41 | 7.27 | 7.05 | 6.87 | 6.67 | 6.55 | 6.35 | 6.23 |
| 42.92 | 7.89 | 7.68 | 7.56 | 7.40 | 7.23 | 7.05 | 6.90 | 6.67 | 6.51 | 6.35 | 6.17 |
| 45.27 | 7.73 | 7.52 | 7.39 | 7.20 | 7.07 | 6.88 | 6.73 | 6.55 | 6.35 | 6.19 | 6.02 |
| 47.81 | 8.06 | 7.89 | 7.77 | 7.54 | 7.34 | 7.16 | 7.00 | 6.79 | 6.63 | 6.47 | 6.31 |
| 50.55 | 7.60 | 7.44 | 7.30 | 7.11 | 7.02 | 6.80 | 6.63 | 6.45 | 6.27 | 6.16 | 5.96 |
| 53.51 | 8.22 | 8.08 | 7.92 | 7.76 | 7.52 | 7.39 | 7.23 | 6.98 | 6.80 | 6.65 | 6.44 |

|         |       |       |       |       |       |       |       |       |       |       |       |
|---------|-------|-------|-------|-------|-------|-------|-------|-------|-------|-------|-------|
| 56.69   | 7.96  | 7.74  | 7.67  | 7.43  | 7.30  | 7.12  | 6.93  | 6.80  | 6.57  | 6.41  | 6.25  |
| 60.13   | 8.00  | 7.83  | 7.70  | 7.50  | 7.32  | 7.16  | 6.95  | 6.77  | 6.62  | 6.41  | 6.21  |
| 63.84   | 8.09  | 7.94  | 7.86  | 7.63  | 7.45  | 7.27  | 7.02  | 6.88  | 6.70  | 6.48  | 6.35  |
| 67.83   | 8.00  | 7.84  | 7.64  | 7.51  | 7.31  | 7.09  | 6.92  | 6.76  | 6.60  | 6.44  | 6.22  |
| 72.15   | 8.04  | 7.91  | 7.79  | 7.61  | 7.39  | 7.22  | 7.07  | 6.87  | 6.70  | 6.50  | 6.34  |
| 76.80   | 7.86  | 7.73  | 7.58  | 7.34  | 7.22  | 6.98  | 6.84  | 6.70  | 6.49  | 6.30  | 6.15  |
| 81.81   | 8.20  | 8.04  | 7.91  | 7.73  | 7.54  | 7.31  | 7.14  | 6.92  | 6.76  | 6.58  | 6.36  |
| 87.22   | 7.99  | 7.81  | 7.70  | 7.50  | 7.28  | 7.12  | 6.94  | 6.71  | 6.56  | 6.34  | 6.18  |
| 93.06   | 8.02  | 7.86  | 7.72  | 7.54  | 7.34  | 7.18  | 7.04  | 6.83  | 6.59  | 6.43  | 6.29  |
| 99.35   | 8.33  | 8.16  | 8.05  | 7.85  | 7.64  | 7.39  | 7.27  | 7.05  | 6.81  | 6.68  | 6.40  |
| 106.13  | 8.22  | 8.09  | 7.90  | 7.77  | 7.58  | 7.41  | 7.15  | 6.93  | 6.78  | 6.62  | 6.41  |
| 113.45  | 8.41  | 8.27  | 8.17  | 7.92  | 7.78  | 7.56  | 7.37  | 7.13  | 6.91  | 6.74  | 6.59  |
| 121.34  | 8.27  | 8.10  | 7.93  | 7.76  | 7.58  | 7.34  | 7.20  | 6.93  | 6.80  | 6.63  | 6.44  |
| 129.86  | 8.19  | 7.99  | 7.81  | 7.65  | 7.48  | 7.26  | 7.10  | 6.91  | 6.68  | 6.53  | 6.36  |
| 139.04  | 8.14  | 8.01  | 7.85  | 7.67  | 7.45  | 7.25  | 7.05  | 6.86  | 6.69  | 6.51  | 6.34  |
| 148.94  | 8.17  | 7.94  | 7.84  | 7.70  | 7.45  | 7.29  | 7.12  | 6.92  | 6.72  | 6.57  | 6.32  |
| 159.62  | 8.50  | 8.32  | 8.19  | 8.00  | 7.77  | 7.58  | 7.40  | 7.19  | 6.98  | 6.80  | 6.60  |
| 171.14  | 8.37  | 8.23  | 8.07  | 7.91  | 7.76  | 7.52  | 7.34  | 7.11  | 6.96  | 6.76  | 6.55  |
| 183.56  | 8.11  | 7.97  | 7.78  | 7.65  | 7.41  | 7.25  | 7.01  | 6.89  | 6.71  | 6.49  | 6.32  |
| 196.96  | 8.69  | 8.54  | 8.33  | 8.17  | 8.01  | 7.80  | 7.63  | 7.40  | 7.23  | 6.97  | 6.86  |
| 211.41  | 8.52  | 8.38  | 8.24  | 8.02  | 7.86  | 7.62  | 7.44  | 7.21  | 7.04  | 6.81  | 6.67  |
| 226.99  | 8.80  | 8.60  | 8.48  | 8.24  | 8.10  | 7.82  | 7.66  | 7.47  | 7.25  | 7.05  | 6.79  |
| 243.80  | 8.36  | 8.20  | 8.05  | 7.86  | 7.66  | 7.52  | 7.33  | 7.12  | 6.92  | 6.73  | 6.51  |
| 261.93  | 8.85  | 8.71  | 8.51  | 8.36  | 8.15  | 7.95  | 7.76  | 7.53  | 7.26  | 7.11  | 6.90  |
| 281.48  | 9.03  | 8.88  | 8.73  | 8.48  | 8.30  | 8.07  | 7.91  | 7.73  | 7.45  | 7.30  | 7.08  |
| 302.56  | 8.88  | 8.68  | 8.51  | 8.35  | 8.18  | 8.00  | 7.79  | 7.52  | 7.36  | 7.13  | 6.94  |
| 325.30  | 9.09  | 8.91  | 8.79  | 8.59  | 8.41  | 8.18  | 8.01  | 7.80  | 7.55  | 7.32  | 7.09  |
| 349.83  | 9.01  | 8.78  | 8.67  | 8.49  | 8.30  | 8.10  | 7.92  | 7.66  | 7.52  | 7.26  | 7.02  |
| 376.28  | 9.31  | 9.15  | 9.00  | 8.85  | 8.62  | 8.38  | 8.26  | 8.00  | 7.77  | 7.54  | 7.34  |
| 404.81  | 9.42  | 9.25  | 9.14  | 8.89  | 8.73  | 8.53  | 8.27  | 8.04  | 7.83  | 7.62  | 7.41  |
| 435.58  | 9.40  | 9.24  | 9.06  | 8.88  | 8.64  | 8.48  | 8.27  | 8.01  | 7.77  | 7.59  | 7.38  |
| 468.76  | 9.52  | 9.32  | 9.21  | 9.01  | 8.81  | 8.63  | 8.40  | 8.20  | 7.99  | 7.71  | 7.49  |
| 504.55  | 9.43  | 9.27  | 9.17  | 8.96  | 8.76  | 8.56  | 8.32  | 8.12  | 7.93  | 7.71  | 7.47  |
| 543.15  | 9.71  | 9.54  | 9.40  | 9.25  | 9.02  | 8.82  | 8.60  | 8.36  | 8.12  | 7.92  | 7.76  |
| 584.78  | 9.59  | 9.46  | 9.31  | 9.14  | 8.95  | 8.74  | 8.50  | 8.27  | 8.08  | 7.82  | 7.63  |
| 629.68  | 9.55  | 9.38  | 9.27  | 9.15  | 8.90  | 8.66  | 8.46  | 8.23  | 8.07  | 7.82  | 7.61  |
| 678.10  | 10.26 | 10.13 | 9.93  | 9.80  | 9.55  | 9.34  | 9.10  | 8.88  | 8.60  | 8.38  | 8.15  |
| 730.33  | 10.51 | 10.32 | 10.22 | 10.02 | 9.78  | 9.57  | 9.37  | 9.09  | 8.84  | 8.60  | 8.40  |
| 786.65  | 10.47 | 10.36 | 10.18 | 10.00 | 9.81  | 9.58  | 9.36  | 9.08  | 8.93  | 8.64  | 8.40  |
| 847.40  | 10.62 | 10.50 | 10.40 | 10.20 | 9.99  | 9.80  | 9.54  | 9.29  | 9.10  | 8.83  | 8.59  |
| 912.92  | 10.89 | 10.72 | 10.59 | 10.37 | 10.16 | 9.93  | 9.73  | 9.46  | 9.27  | 8.97  | 8.76  |
| 983.58  | 11.10 | 10.94 | 10.76 | 10.59 | 10.40 | 10.18 | 9.91  | 9.73  | 9.49  | 9.22  | 8.97  |
| 1059.78 | 11.26 | 11.06 | 11.00 | 10.76 | 10.57 | 10.34 | 10.06 | 9.82  | 9.59  | 9.35  | 9.07  |
| 1141.98 | 11.19 | 11.06 | 10.91 | 10.74 | 10.51 | 10.30 | 10.05 | 9.82  | 9.60  | 9.34  | 9.08  |
| 1230.62 | 10.90 | 10.72 | 10.58 | 10.40 | 10.24 | 10.04 | 9.77  | 9.56  | 9.31  | 9.09  | 8.82  |
| 1326.23 | 11.45 | 11.32 | 11.23 | 11.03 | 10.81 | 10.65 | 10.35 | 10.09 | 9.80  | 9.59  | 9.33  |
| 1429.34 | 12.08 | 12.03 | 11.81 | 11.67 | 11.43 | 11.20 | 10.96 | 10.67 | 10.39 | 10.17 | 9.90  |
| 1540.54 | 11.96 | 11.78 | 11.67 | 11.50 | 11.26 | 11.06 | 10.82 | 10.54 | 10.26 | 10.01 | 9.73  |
| 1660.48 | 12.16 | 12.06 | 11.89 | 11.72 | 11.50 | 11.26 | 11.03 | 10.75 | 10.52 | 10.22 | 9.92  |
| 1789.83 | 12.18 | 12.06 | 11.89 | 11.68 | 11.54 | 11.30 | 11.05 | 10.78 | 10.55 | 10.24 | 10.01 |



|         |       |       |       |       |       |       |       |       |       |       |       |
|---------|-------|-------|-------|-------|-------|-------|-------|-------|-------|-------|-------|
| 1929.34 | 12.46 | 12.33 | 12.23 | 12.02 | 11.80 | 11.57 | 11.31 | 11.03 | 10.78 | 10.47 | 10.24 |
| 2079.80 | 12.31 | 12.18 | 12.09 | 11.94 | 11.69 | 11.50 | 11.29 | 10.94 | 10.71 | 10.42 | 10.21 |
| 2242.08 | 12.48 | 12.33 | 12.25 | 12.07 | 11.85 | 11.63 | 11.40 | 11.09 | 10.86 | 10.56 | 10.31 |
| 2417.10 | 12.58 | 12.49 | 12.29 | 12.15 | 11.95 | 11.73 | 11.49 | 11.19 | 10.97 | 10.67 | 10.42 |
| 2605.85 | 12.45 | 12.37 | 12.20 | 12.02 | 11.82 | 11.62 | 11.39 | 11.12 | 10.82 | 10.55 | 10.28 |
| 2809.43 | 12.00 | 11.86 | 11.74 | 11.57 | 11.38 | 11.17 | 10.97 | 10.69 | 10.45 | 10.18 | 9.92  |
| 3028.99 | 12.50 | 12.39 | 12.29 | 12.09 | 11.90 | 11.71 | 11.46 | 11.20 | 10.92 | 10.66 | 10.37 |
| 3265.79 | 12.50 | 12.38 | 12.25 | 12.14 | 11.93 | 11.71 | 11.44 | 11.20 | 10.89 | 10.68 | 10.37 |
| 3521.18 | 12.45 | 12.36 | 12.22 | 12.10 | 11.92 | 11.64 | 11.37 | 11.15 | 10.88 | 10.59 | 10.31 |
| 3796.62 | 12.13 | 12.00 | 11.90 | 11.70 | 11.55 | 11.35 | 11.12 | 10.86 | 10.65 | 10.32 | 10.07 |

| Wavelength (nm) \ Time (ps) | 584.10 | 585.51 | 586.92 | 588.33 | 589.74 | 591.15 | 592.55 | 593.96 | 595.37 | 596.78 | 598.19 |
|-----------------------------|--------|--------|--------|--------|--------|--------|--------|--------|--------|--------|--------|
| -3.28                       | 0.00   | 0.02   | -0.01  | 0.06   | 0.02   | 0.03   | -0.02  | 0.02   | 0.03   | 0.01   | 0.00   |
| -2.78                       | -0.04  | -0.07  | -0.04  | -0.06  | -0.03  | 0.02   | -0.03  | -0.01  | -0.06  | -0.02  | -0.03  |
| -2.28                       | -0.03  | -0.03  | -0.01  | -0.08  | -0.02  | -0.07  | -0.06  | -0.06  | -0.03  | -0.08  | 0.00   |
| -1.78                       | 0.12   | 0.16   | 0.15   | 0.13   | 0.11   | 0.11   | 0.16   | 0.11   | 0.11   | 0.13   | 0.14   |
| -1.28                       | -0.04  | -0.06  | -0.06  | -0.06  | -0.02  | -0.07  | -0.03  | -0.05  | -0.07  | -0.06  | -0.05  |
| -0.78                       | -0.06  | -0.04  | -0.04  | -0.01  | -0.06  | -0.04  | -0.04  | -0.06  | -0.05  | -0.03  | -0.02  |
| -0.28                       | 0.07   | 0.03   | 0.04   | 0.05   | 0.03   | 0.02   | 0.04   | 0.01   | 0.03   | 0.05   | 0.01   |
| 0.22                        | 0.02   | 0.05   | 0.02   | -0.01  | 0.02   | 0.05   | 0.05   | 0.04   | 0.03   | 0.00   | -0.01  |
| 0.32                        | -0.01  | -0.03  | -0.03  | 0.02   | 0.02   | -0.01  | -0.04  | 0.00   | 0.03   | 0.02   | 0.00   |
| 0.42                        | -0.03  | -0.03  | 0.00   | -0.06  | -0.07  | -0.04  | -0.03  | -0.01  | -0.02  | -0.02  | -0.04  |
| 0.52                        | 0.02   | 0.00   | -0.01  | -0.02  | -0.01  | 0.02   | -0.05  | -0.01  | -0.01  | 0.01   | -0.10  |
| 0.62                        | 0.06   | 0.04   | 0.01   | 0.04   | 0.03   | 0.01   | 0.04   | 0.02   | 0.04   | 0.02   | 0.01   |
| 0.72                        | 0.01   | 0.03   | -0.05  | -0.02  | -0.06  | -0.03  | -0.04  | -0.04  | -0.10  | -0.06  | -0.04  |
| 0.77                        | 0.02   | 0.04   | 0.02   | 0.03   | 0.01   | -0.01  | -0.02  | -0.01  | 0.00   | 0.05   | -0.03  |
| 0.82                        | -0.01  | 0.01   | 0.00   | -0.02  | 0.00   | -0.05  | -0.01  | -0.04  | -0.01  | -0.01  | -0.04  |
| 0.87                        | 0.05   | 0.07   | 0.03   | 0.05   | 0.06   | 0.06   | 0.04   | 0.04   | 0.04   | 0.05   | 0.02   |
| 0.92                        | -0.09  | -0.10  | -0.11  | -0.17  | -0.14  | -0.12  | -0.15  | -0.14  | -0.14  | -0.13  | -0.14  |
| 0.97                        | 0.06   | 0.05   | 0.07   | 0.05   | 0.06   | 0.10   | 0.10   | 0.08   | 0.08   | 0.10   | 0.01   |
| 1.02                        | -0.08  | -0.06  | -0.06  | -0.08  | -0.03  | -0.07  | -0.03  | -0.06  | -0.07  | -0.02  | -0.03  |
| 1.07                        | 0.07   | 0.04   | 0.04   | 0.06   | 0.05   | 0.05   | 0.02   | 0.03   | 0.03   | 0.03   | 0.03   |
| 1.12                        | -0.11  | -0.12  | -0.07  | -0.12  | -0.09  | -0.12  | -0.06  | -0.09  | -0.10  | -0.04  | -0.06  |
| 1.17                        | -0.06  | -0.04  | -0.02  | -0.10  | -0.03  | -0.04  | -0.01  | -0.06  | -0.04  | -0.03  | -0.02  |
| 1.22                        | -0.09  | -0.02  | -0.06  | -0.10  | -0.09  | -0.09  | -0.11  | -0.07  | -0.04  | -0.08  | -0.08  |
| 1.27                        | 0.09   | 0.07   | 0.09   | 0.05   | 0.08   | 0.03   | 0.09   | 0.07   | 0.07   | 0.09   | 0.06   |
| 1.32                        | 0.08   | 0.09   | 0.06   | 0.02   | 0.03   | 0.02   | 0.09   | 0.07   | 0.03   | 0.09   | 0.04   |
| 1.37                        | 0.01   | -0.03  | -0.03  | -0.05  | -0.01  | 0.02   | -0.02  | -0.03  | -0.05  | 0.01   | -0.02  |
| 1.42                        | -0.09  | -0.05  | -0.08  | -0.06  | -0.04  | -0.04  | -0.07  | -0.07  | -0.08  | -0.05  | -0.12  |
| 1.47                        | -0.14  | -0.14  | -0.18  | -0.15  | -0.15  | -0.14  | -0.15  | -0.14  | -0.15  | -0.09  | -0.12  |
| 1.52                        | 0.07   | 0.05   | -0.01  | 0.00   | -0.07  | -0.14  | -0.14  | -0.17  | -0.19  | -0.21  | -0.20  |
| 1.57                        | 2.94   | 2.79   | 2.60   | 2.43   | 2.27   | 2.08   | 1.90   | 1.67   | 1.58   | 1.46   | 1.33   |
| 1.62                        | 7.95   | 7.76   | 7.56   | 7.39   | 7.20   | 6.96   | 6.76   | 6.52   | 6.22   | 6.02   | 5.72   |
| 1.67                        | 10.32  | 10.33  | 10.23  | 10.17  | 10.20  | 10.12  | 10.01  | 9.95   | 9.81   | 9.70   | 9.57   |
| 1.72                        | 9.84   | 9.80   | 9.79   | 9.76   | 9.74   | 9.72   | 9.65   | 9.65   | 9.63   | 9.56   | 9.51   |
| 1.77                        | 8.93   | 8.92   | 8.85   | 8.82   | 8.77   | 8.73   | 8.63   | 8.57   | 8.50   | 8.47   | 8.41   |
| 1.82                        | 8.06   | 8.04   | 7.98   | 7.91   | 7.86   | 7.77   | 7.71   | 7.63   | 7.52   | 7.48   | 7.38   |
| 1.87                        | 7.68   | 7.62   | 7.55   | 7.48   | 7.44   | 7.30   | 7.23   | 7.10   | 7.02   | 6.95   | 6.80   |

|      |      |      |      |      |      |      |      |      |      |      |      |
|------|------|------|------|------|------|------|------|------|------|------|------|
| 1.92 | 7.69 | 7.63 | 7.57 | 7.46 | 7.38 | 7.28 | 7.16 | 7.01 | 6.91 | 6.81 | 6.70 |
| 1.97 | 7.76 | 7.73 | 7.63 | 7.55 | 7.50 | 7.40 | 7.28 | 7.13 | 6.94 | 6.84 | 6.69 |
| 2.02 | 7.76 | 7.74 | 7.62 | 7.55 | 7.40 | 7.35 | 7.22 | 7.08 | 6.87 | 6.78 | 6.67 |
| 2.07 | 7.76 | 7.75 | 7.63 | 7.52 | 7.46 | 7.28 | 7.21 | 7.04 | 6.92 | 6.82 | 6.63 |
| 2.12 | 8.13 | 8.13 | 8.02 | 7.93 | 7.82 | 7.72 | 7.62 | 7.44 | 7.28 | 7.10 | 6.92 |
| 2.17 | 7.83 | 7.78 | 7.69 | 7.58 | 7.50 | 7.37 | 7.24 | 7.08 | 6.87 | 6.79 | 6.57 |
| 2.22 | 7.80 | 7.77 | 7.68 | 7.56 | 7.43 | 7.32 | 7.20 | 7.02 | 6.87 | 6.75 | 6.49 |
| 2.27 | 7.83 | 7.76 | 7.65 | 7.53 | 7.45 | 7.29 | 7.17 | 7.01 | 6.86 | 6.68 | 6.53 |
| 2.32 | 7.68 | 7.63 | 7.55 | 7.39 | 7.31 | 7.21 | 7.06 | 6.89 | 6.71 | 6.58 | 6.36 |
| 2.37 | 7.92 | 7.85 | 7.76 | 7.65 | 7.51 | 7.43 | 7.27 | 7.13 | 6.96 | 6.79 | 6.66 |
| 2.42 | 7.87 | 7.82 | 7.69 | 7.54 | 7.49 | 7.34 | 7.23 | 7.06 | 6.89 | 6.72 | 6.51 |
| 2.47 | 7.59 | 7.50 | 7.39 | 7.29 | 7.17 | 7.07 | 6.90 | 6.78 | 6.55 | 6.43 | 6.20 |
| 2.52 | 7.86 | 7.81 | 7.74 | 7.63 | 7.47 | 7.33 | 7.18 | 7.05 | 6.83 | 6.68 | 6.48 |
| 2.57 | 7.62 | 7.54 | 7.49 | 7.38 | 7.26 | 7.16 | 6.97 | 6.82 | 6.64 | 6.53 | 6.31 |
| 2.62 | 7.71 | 7.62 | 7.53 | 7.42 | 7.34 | 7.21 | 7.05 | 6.90 | 6.73 | 6.53 | 6.34 |
| 2.67 | 7.42 | 7.36 | 7.23 | 7.16 | 7.01 | 6.92 | 6.78 | 6.64 | 6.44 | 6.35 | 6.15 |
| 2.72 | 7.67 | 7.60 | 7.48 | 7.38 | 7.26 | 7.11 | 6.97 | 6.84 | 6.67 | 6.47 | 6.24 |
| 2.77 | 7.85 | 7.74 | 7.64 | 7.52 | 7.46 | 7.28 | 7.12 | 6.96 | 6.75 | 6.60 | 6.35 |
| 2.82 | 7.62 | 7.55 | 7.48 | 7.34 | 7.22 | 7.10 | 6.94 | 6.75 | 6.57 | 6.48 | 6.22 |
| 2.87 | 7.57 | 7.52 | 7.45 | 7.30 | 7.17 | 7.03 | 6.88 | 6.73 | 6.57 | 6.35 | 6.20 |
| 2.92 | 7.61 | 7.57 | 7.48 | 7.35 | 7.22 | 7.02 | 6.99 | 6.83 | 6.61 | 6.45 | 6.22 |
| 2.97 | 7.65 | 7.56 | 7.48 | 7.32 | 7.21 | 7.09 | 6.91 | 6.75 | 6.57 | 6.42 | 6.24 |
| 3.02 | 7.88 | 7.79 | 7.69 | 7.55 | 7.43 | 7.25 | 7.14 | 6.97 | 6.77 | 6.64 | 6.42 |
| 3.07 | 7.75 | 7.65 | 7.56 | 7.43 | 7.32 | 7.14 | 6.98 | 6.84 | 6.61 | 6.46 | 6.30 |
| 3.12 | 7.91 | 7.84 | 7.74 | 7.62 | 7.47 | 7.28 | 7.17 | 7.01 | 6.75 | 6.64 | 6.42 |
| 3.17 | 7.90 | 7.84 | 7.73 | 7.62 | 7.46 | 7.34 | 7.16 | 7.00 | 6.79 | 6.64 | 6.39 |
| 3.22 | 7.83 | 7.70 | 7.60 | 7.48 | 7.36 | 7.23 | 7.04 | 6.88 | 6.65 | 6.51 | 6.26 |
| 3.27 | 7.62 | 7.52 | 7.43 | 7.29 | 7.16 | 7.06 | 6.89 | 6.70 | 6.51 | 6.36 | 6.18 |
| 3.32 | 8.01 | 7.91 | 7.82 | 7.64 | 7.49 | 7.36 | 7.19 | 7.03 | 6.84 | 6.62 | 6.43 |
| 3.37 | 7.58 | 7.49 | 7.36 | 7.26 | 7.11 | 6.98 | 6.81 | 6.62 | 6.46 | 6.28 | 6.10 |
| 3.42 | 7.82 | 7.73 | 7.57 | 7.46 | 7.38 | 7.19 | 7.02 | 6.87 | 6.67 | 6.47 | 6.31 |
| 3.47 | 7.81 | 7.74 | 7.64 | 7.48 | 7.36 | 7.22 | 7.00 | 6.85 | 6.65 | 6.54 | 6.28 |
| 3.52 | 7.61 | 7.53 | 7.42 | 7.28 | 7.10 | 6.97 | 6.82 | 6.64 | 6.49 | 6.28 | 6.11 |
| 3.57 | 7.40 | 7.33 | 7.20 | 7.05 | 6.91 | 6.78 | 6.57 | 6.42 | 6.28 | 6.14 | 5.92 |
| 3.62 | 7.63 | 7.47 | 7.36 | 7.22 | 7.10 | 6.95 | 6.77 | 6.59 | 6.40 | 6.24 | 6.00 |
| 3.67 | 7.44 | 7.34 | 7.24 | 7.11 | 6.96 | 6.82 | 6.63 | 6.49 | 6.28 | 6.11 | 5.94 |
| 3.72 | 7.54 | 7.47 | 7.35 | 7.19 | 7.06 | 6.92 | 6.73 | 6.58 | 6.39 | 6.19 | 5.98 |
| 3.92 | 7.93 | 7.79 | 7.68 | 7.56 | 7.40 | 7.24 | 7.06 | 6.85 | 6.60 | 6.43 | 6.22 |
| 4.12 | 7.57 | 7.49 | 7.31 | 7.16 | 7.03 | 6.90 | 6.72 | 6.55 | 6.36 | 6.19 | 6.00 |
| 4.32 | 7.33 | 7.22 | 7.08 | 6.92 | 6.78 | 6.63 | 6.47 | 6.29 | 6.09 | 5.91 | 5.75 |
| 4.52 | 7.48 | 7.34 | 7.18 | 7.08 | 6.90 | 6.71 | 6.56 | 6.35 | 6.19 | 6.02 | 5.78 |
| 4.72 | 7.36 | 7.30 | 7.14 | 6.99 | 6.84 | 6.65 | 6.47 | 6.35 | 6.08 | 6.01 | 5.77 |
| 4.92 | 7.63 | 7.46 | 7.39 | 7.16 | 7.04 | 6.86 | 6.64 | 6.48 | 6.29 | 6.12 | 5.85 |
| 5.12 | 7.41 | 7.23 | 7.09 | 6.93 | 6.80 | 6.62 | 6.46 | 6.24 | 6.07 | 5.87 | 5.66 |
| 5.32 | 7.60 | 7.45 | 7.32 | 7.14 | 7.00 | 6.79 | 6.65 | 6.45 | 6.26 | 6.07 | 5.82 |
| 5.52 | 7.50 | 7.42 | 7.23 | 7.04 | 6.88 | 6.75 | 6.57 | 6.32 | 6.13 | 5.94 | 5.73 |
| 5.72 | 7.57 | 7.42 | 7.26 | 7.07 | 6.95 | 6.73 | 6.55 | 6.38 | 6.21 | 5.97 | 5.76 |
| 5.92 | 7.36 | 7.19 | 7.06 | 6.85 | 6.74 | 6.54 | 6.39 | 6.18 | 5.99 | 5.82 | 5.61 |
| 6.12 | 7.35 | 7.27 | 7.12 | 6.96 | 6.79 | 6.62 | 6.48 | 6.24 | 6.08 | 5.86 | 5.64 |
| 6.32 | 7.24 | 7.11 | 6.94 | 6.76 | 6.63 | 6.44 | 6.26 | 6.08 | 5.91 | 5.73 | 5.47 |

|       |      |      |      |      |      |      |      |      |      |      |      |
|-------|------|------|------|------|------|------|------|------|------|------|------|
| 6.52  | 7.21 | 7.05 | 6.91 | 6.74 | 6.59 | 6.44 | 6.20 | 6.06 | 5.86 | 5.65 | 5.43 |
| 6.72  | 7.61 | 7.40 | 7.23 | 7.07 | 6.89 | 6.74 | 6.55 | 6.32 | 6.11 | 5.88 | 5.69 |
| 6.92  | 7.26 | 7.15 | 6.92 | 6.79 | 6.65 | 6.41 | 6.27 | 6.09 | 5.89 | 5.72 | 5.49 |
| 7.12  | 7.17 | 7.00 | 6.85 | 6.67 | 6.53 | 6.36 | 6.14 | 5.95 | 5.78 | 5.59 | 5.40 |
| 7.32  | 7.40 | 7.27 | 7.11 | 6.94 | 6.75 | 6.60 | 6.38 | 6.20 | 6.02 | 5.82 | 5.57 |
| 7.52  | 7.27 | 7.07 | 6.92 | 6.74 | 6.59 | 6.41 | 6.21 | 6.00 | 5.83 | 5.64 | 5.43 |
| 7.72  | 7.22 | 7.08 | 6.93 | 6.71 | 6.55 | 6.40 | 6.22 | 6.02 | 5.83 | 5.60 | 5.40 |
| 7.92  | 7.12 | 6.99 | 6.78 | 6.64 | 6.45 | 6.26 | 6.09 | 5.89 | 5.72 | 5.51 | 5.28 |
| 8.12  | 7.20 | 7.00 | 6.90 | 6.69 | 6.54 | 6.35 | 6.11 | 5.96 | 5.76 | 5.56 | 5.33 |
| 8.32  | 7.08 | 6.92 | 6.80 | 6.58 | 6.45 | 6.28 | 6.11 | 5.88 | 5.65 | 5.47 | 5.26 |
| 8.52  | 6.98 | 6.81 | 6.63 | 6.44 | 6.33 | 6.11 | 5.95 | 5.77 | 5.61 | 5.38 | 5.17 |
| 8.72  | 7.21 | 7.12 | 6.90 | 6.76 | 6.58 | 6.41 | 6.25 | 6.04 | 5.77 | 5.66 | 5.46 |
| 8.92  | 7.02 | 6.85 | 6.66 | 6.54 | 6.39 | 6.18 | 5.97 | 5.83 | 5.60 | 5.40 | 5.23 |
| 9.12  | 7.16 | 7.01 | 6.78 | 6.60 | 6.47 | 6.29 | 6.12 | 5.90 | 5.71 | 5.47 | 5.32 |
| 9.32  | 6.73 | 6.62 | 6.44 | 6.25 | 6.14 | 5.91 | 5.77 | 5.57 | 5.39 | 5.22 | 4.98 |
| 9.52  | 7.07 | 6.94 | 6.76 | 6.52 | 6.39 | 6.24 | 6.04 | 5.87 | 5.65 | 5.43 | 5.22 |
| 9.72  | 6.97 | 6.77 | 6.62 | 6.45 | 6.28 | 6.10 | 5.93 | 5.74 | 5.56 | 5.38 | 5.12 |
| 9.92  | 6.95 | 6.80 | 6.62 | 6.39 | 6.28 | 6.10 | 5.90 | 5.74 | 5.52 | 5.36 | 5.15 |
| 10.12 | 7.20 | 6.98 | 6.80 | 6.66 | 6.46 | 6.25 | 6.11 | 5.91 | 5.70 | 5.50 | 5.26 |
| 10.32 | 6.61 | 6.48 | 6.32 | 6.14 | 5.97 | 5.81 | 5.65 | 5.48 | 5.23 | 5.09 | 4.85 |
| 10.52 | 6.92 | 6.69 | 6.53 | 6.43 | 6.26 | 6.06 | 5.90 | 5.73 | 5.51 | 5.35 | 5.10 |
| 10.72 | 6.95 | 6.84 | 6.66 | 6.48 | 6.33 | 6.12 | 5.93 | 5.77 | 5.52 | 5.34 | 5.08 |
| 10.92 | 6.88 | 6.66 | 6.49 | 6.28 | 6.19 | 6.00 | 5.81 | 5.61 | 5.45 | 5.24 | 4.99 |
| 11.12 | 6.80 | 6.64 | 6.46 | 6.29 | 6.19 | 5.98 | 5.76 | 5.55 | 5.39 | 5.22 | 4.99 |
| 11.32 | 6.91 | 6.75 | 6.59 | 6.40 | 6.22 | 6.03 | 5.87 | 5.63 | 5.49 | 5.28 | 5.05 |
| 11.52 | 6.71 | 6.55 | 6.38 | 6.22 | 6.02 | 5.86 | 5.68 | 5.49 | 5.32 | 5.13 | 4.89 |
| 11.72 | 6.71 | 6.55 | 6.37 | 6.23 | 6.03 | 5.87 | 5.70 | 5.51 | 5.33 | 5.15 | 4.94 |
| 11.92 | 6.73 | 6.58 | 6.42 | 6.24 | 6.03 | 5.84 | 5.74 | 5.51 | 5.27 | 5.12 | 4.89 |
| 12.12 | 6.96 | 6.79 | 6.62 | 6.42 | 6.28 | 6.09 | 5.93 | 5.70 | 5.51 | 5.33 | 5.12 |
| 12.32 | 6.83 | 6.61 | 6.49 | 6.33 | 6.13 | 6.02 | 5.77 | 5.58 | 5.35 | 5.17 | 4.98 |
| 12.52 | 6.57 | 6.40 | 6.27 | 6.09 | 5.97 | 5.78 | 5.59 | 5.38 | 5.19 | 5.03 | 4.74 |
| 12.72 | 6.63 | 6.48 | 6.28 | 6.07 | 5.93 | 5.74 | 5.57 | 5.42 | 5.20 | 5.03 | 4.78 |
| 12.92 | 6.74 | 6.60 | 6.38 | 6.30 | 6.09 | 5.88 | 5.77 | 5.56 | 5.36 | 5.21 | 4.95 |
| 13.12 | 6.53 | 6.38 | 6.24 | 6.06 | 5.93 | 5.73 | 5.56 | 5.38 | 5.19 | 5.01 | 4.83 |
| 13.32 | 6.84 | 6.70 | 6.50 | 6.34 | 6.18 | 5.99 | 5.82 | 5.61 | 5.41 | 5.23 | 5.02 |
| 13.52 | 6.42 | 6.30 | 6.10 | 5.95 | 5.81 | 5.66 | 5.47 | 5.25 | 5.09 | 4.87 | 4.69 |
| 13.72 | 6.79 | 6.59 | 6.44 | 6.24 | 6.11 | 5.90 | 5.70 | 5.48 | 5.28 | 5.13 | 4.91 |
| 13.92 | 6.51 | 6.36 | 6.18 | 5.99 | 5.83 | 5.67 | 5.50 | 5.31 | 5.10 | 4.96 | 4.74 |
| 14.00 | 6.81 | 6.65 | 6.46 | 6.27 | 6.13 | 5.92 | 5.79 | 5.58 | 5.35 | 5.23 | 4.94 |
| 14.08 | 6.67 | 6.51 | 6.35 | 6.16 | 6.00 | 5.89 | 5.67 | 5.50 | 5.28 | 5.12 | 4.88 |
| 14.17 | 6.55 | 6.36 | 6.20 | 6.01 | 5.88 | 5.73 | 5.55 | 5.35 | 5.14 | 4.96 | 4.73 |
| 14.27 | 6.51 | 6.36 | 6.21 | 6.04 | 5.89 | 5.73 | 5.52 | 5.36 | 5.18 | 4.96 | 4.75 |
| 14.38 | 6.57 | 6.45 | 6.28 | 6.05 | 5.90 | 5.75 | 5.52 | 5.36 | 5.15 | 4.94 | 4.76 |
| 14.49 | 6.34 | 6.19 | 6.04 | 5.90 | 5.69 | 5.55 | 5.39 | 5.19 | 5.00 | 4.85 | 4.60 |
| 14.61 | 6.53 | 6.37 | 6.20 | 6.04 | 5.89 | 5.75 | 5.53 | 5.33 | 5.15 | 4.95 | 4.76 |
| 14.75 | 6.48 | 6.35 | 6.14 | 6.00 | 5.88 | 5.65 | 5.50 | 5.32 | 5.16 | 4.96 | 4.74 |
| 14.89 | 6.91 | 6.76 | 6.50 | 6.37 | 6.21 | 6.04 | 5.83 | 5.60 | 5.43 | 5.21 | 4.99 |
| 15.05 | 6.44 | 6.28 | 6.11 | 5.98 | 5.81 | 5.61 | 5.45 | 5.28 | 5.06 | 4.89 | 4.66 |
| 15.21 | 6.58 | 6.41 | 6.21 | 6.02 | 5.87 | 5.70 | 5.52 | 5.36 | 5.14 | 4.96 | 4.69 |
| 15.39 | 6.32 | 6.16 | 5.98 | 5.79 | 5.69 | 5.51 | 5.37 | 5.13 | 4.97 | 4.84 | 4.61 |

|        |      |      |      |      |      |      |      |      |      |      |      |
|--------|------|------|------|------|------|------|------|------|------|------|------|
| 15.59  | 6.55 | 6.39 | 6.19 | 6.09 | 5.90 | 5.65 | 5.50 | 5.33 | 5.16 | 4.98 | 4.74 |
| 15.80  | 6.74 | 6.55 | 6.36 | 6.23 | 6.04 | 5.88 | 5.68 | 5.51 | 5.30 | 5.12 | 4.89 |
| 16.02  | 6.31 | 6.15 | 6.00 | 5.85 | 5.67 | 5.51 | 5.32 | 5.15 | 4.98 | 4.82 | 4.60 |
| 16.27  | 6.74 | 6.57 | 6.38 | 6.24 | 6.06 | 5.84 | 5.63 | 5.45 | 5.24 | 5.05 | 4.84 |
| 16.53  | 6.52 | 6.33 | 6.17 | 5.98 | 5.84 | 5.61 | 5.47 | 5.29 | 5.07 | 4.92 | 4.67 |
| 16.81  | 6.36 | 6.19 | 6.01 | 5.80 | 5.66 | 5.50 | 5.32 | 5.14 | 4.95 | 4.81 | 4.58 |
| 17.12  | 6.57 | 6.43 | 6.25 | 6.07 | 5.96 | 5.73 | 5.58 | 5.36 | 5.15 | 5.03 | 4.75 |
| 17.45  | 6.31 | 6.14 | 6.01 | 5.82 | 5.64 | 5.51 | 5.31 | 5.12 | 4.96 | 4.79 | 4.58 |
| 17.81  | 6.68 | 6.49 | 6.32 | 6.13 | 5.97 | 5.83 | 5.63 | 5.39 | 5.24 | 5.09 | 4.87 |
| 18.19  | 6.63 | 6.46 | 6.28 | 6.11 | 5.98 | 5.76 | 5.60 | 5.38 | 5.18 | 5.01 | 4.75 |
| 18.60  | 6.55 | 6.37 | 6.23 | 6.07 | 5.89 | 5.72 | 5.56 | 5.32 | 5.13 | 4.94 | 4.74 |
| 19.05  | 6.52 | 6.33 | 6.16 | 5.98 | 5.86 | 5.69 | 5.46 | 5.30 | 5.09 | 4.91 | 4.65 |
| 19.53  | 6.48 | 6.31 | 6.15 | 5.95 | 5.82 | 5.64 | 5.49 | 5.24 | 5.06 | 4.88 | 4.66 |
| 20.05  | 6.40 | 6.25 | 6.07 | 5.89 | 5.74 | 5.57 | 5.38 | 5.22 | 4.98 | 4.81 | 4.63 |
| 20.61  | 6.40 | 6.26 | 6.07 | 5.85 | 5.71 | 5.58 | 5.36 | 5.17 | 4.96 | 4.79 | 4.59 |
| 21.22  | 6.30 | 6.14 | 5.99 | 5.76 | 5.65 | 5.47 | 5.29 | 5.09 | 4.88 | 4.76 | 4.51 |
| 21.87  | 6.41 | 6.25 | 6.07 | 5.86 | 5.66 | 5.57 | 5.35 | 5.23 | 4.98 | 4.78 | 4.59 |
| 22.57  | 6.30 | 6.20 | 5.98 | 5.81 | 5.72 | 5.49 | 5.35 | 5.18 | 4.95 | 4.78 | 4.53 |
| 23.33  | 6.44 | 6.32 | 6.11 | 5.94 | 5.78 | 5.61 | 5.40 | 5.24 | 5.00 | 4.86 | 4.67 |
| 24.15  | 6.17 | 6.02 | 5.84 | 5.66 | 5.48 | 5.32 | 5.20 | 4.98 | 4.78 | 4.64 | 4.40 |
| 25.03  | 6.20 | 6.00 | 5.90 | 5.73 | 5.56 | 5.39 | 5.24 | 4.98 | 4.85 | 4.67 | 4.46 |
| 25.98  | 6.50 | 6.37 | 6.18 | 5.96 | 5.79 | 5.62 | 5.47 | 5.25 | 5.06 | 4.89 | 4.66 |
| 27.01  | 6.13 | 5.99 | 5.79 | 5.64 | 5.45 | 5.30 | 5.16 | 4.94 | 4.79 | 4.59 | 4.37 |
| 28.11  | 6.38 | 6.24 | 6.07 | 5.85 | 5.70 | 5.54 | 5.32 | 5.17 | 4.97 | 4.76 | 4.56 |
| 29.30  | 6.28 | 6.15 | 5.97 | 5.76 | 5.61 | 5.40 | 5.28 | 5.10 | 4.91 | 4.73 | 4.49 |
| 30.59  | 6.19 | 5.98 | 5.88 | 5.67 | 5.54 | 5.39 | 5.20 | 5.01 | 4.81 | 4.61 | 4.41 |
| 31.98  | 6.15 | 6.02 | 5.84 | 5.70 | 5.47 | 5.35 | 5.14 | 5.00 | 4.78 | 4.60 | 4.36 |
| 33.47  | 6.16 | 6.00 | 5.84 | 5.69 | 5.52 | 5.32 | 5.13 | 4.98 | 4.82 | 4.60 | 4.39 |
| 35.09  | 6.08 | 5.92 | 5.81 | 5.61 | 5.43 | 5.27 | 5.04 | 4.93 | 4.75 | 4.53 | 4.36 |
| 36.83  | 6.27 | 6.13 | 5.96 | 5.80 | 5.61 | 5.48 | 5.29 | 5.08 | 4.91 | 4.70 | 4.45 |
| 38.71  | 6.06 | 5.89 | 5.72 | 5.57 | 5.38 | 5.23 | 5.05 | 4.86 | 4.71 | 4.49 | 4.26 |
| 40.73  | 6.07 | 5.87 | 5.73 | 5.53 | 5.35 | 5.20 | 5.05 | 4.89 | 4.66 | 4.51 | 4.30 |
| 42.92  | 6.04 | 5.87 | 5.68 | 5.48 | 5.33 | 5.16 | 4.99 | 4.79 | 4.60 | 4.45 | 4.25 |
| 45.27  | 5.91 | 5.76 | 5.62 | 5.41 | 5.24 | 5.09 | 4.91 | 4.75 | 4.54 | 4.39 | 4.17 |
| 47.81  | 6.12 | 5.95 | 5.77 | 5.57 | 5.44 | 5.26 | 5.06 | 4.88 | 4.73 | 4.53 | 4.30 |
| 50.55  | 5.80 | 5.66 | 5.51 | 5.34 | 5.18 | 5.07 | 4.88 | 4.69 | 4.52 | 4.35 | 4.14 |
| 53.51  | 6.30 | 6.09 | 5.91 | 5.75 | 5.54 | 5.40 | 5.21 | 5.03 | 4.85 | 4.70 | 4.43 |
| 56.69  | 6.09 | 5.95 | 5.70 | 5.57 | 5.38 | 5.20 | 5.07 | 4.87 | 4.66 | 4.54 | 4.34 |
| 60.13  | 6.08 | 5.93 | 5.75 | 5.56 | 5.42 | 5.20 | 5.05 | 4.83 | 4.68 | 4.47 | 4.28 |
| 63.84  | 6.19 | 5.99 | 5.84 | 5.61 | 5.48 | 5.32 | 5.12 | 4.98 | 4.75 | 4.60 | 4.36 |
| 67.83  | 6.09 | 5.92 | 5.76 | 5.58 | 5.39 | 5.21 | 5.12 | 4.85 | 4.69 | 4.47 | 4.29 |
| 72.15  | 6.14 | 5.99 | 5.81 | 5.61 | 5.46 | 5.28 | 5.10 | 4.89 | 4.70 | 4.54 | 4.35 |
| 76.80  | 5.98 | 5.84 | 5.65 | 5.46 | 5.30 | 5.11 | 4.98 | 4.75 | 4.57 | 4.41 | 4.23 |
| 81.81  | 6.23 | 6.06 | 5.85 | 5.65 | 5.51 | 5.29 | 5.11 | 4.92 | 4.73 | 4.52 | 4.35 |
| 87.22  | 5.98 | 5.86 | 5.69 | 5.44 | 5.33 | 5.14 | 4.98 | 4.75 | 4.57 | 4.45 | 4.18 |
| 93.06  | 6.08 | 5.94 | 5.76 | 5.59 | 5.39 | 5.27 | 5.06 | 4.84 | 4.66 | 4.52 | 4.30 |
| 99.35  | 6.31 | 6.12 | 5.94 | 5.74 | 5.58 | 5.40 | 5.20 | 5.06 | 4.79 | 4.61 | 4.38 |
| 106.13 | 6.27 | 6.11 | 5.94 | 5.73 | 5.51 | 5.34 | 5.18 | 5.01 | 4.79 | 4.59 | 4.37 |
| 113.45 | 6.39 | 6.19 | 5.99 | 5.82 | 5.65 | 5.45 | 5.32 | 5.05 | 4.87 | 4.71 | 4.49 |
| 121.34 | 6.24 | 6.10 | 5.90 | 5.68 | 5.52 | 5.36 | 5.14 | 4.95 | 4.72 | 4.58 | 4.36 |

|         |       |      |      |      |      |      |      |      |      |      |      |
|---------|-------|------|------|------|------|------|------|------|------|------|------|
| 129.86  | 6.20  | 6.03 | 5.81 | 5.64 | 5.49 | 5.31 | 5.12 | 4.89 | 4.73 | 4.53 | 4.30 |
| 139.04  | 6.16  | 5.99 | 5.83 | 5.66 | 5.42 | 5.28 | 5.08 | 4.98 | 4.72 | 4.55 | 4.30 |
| 148.94  | 6.19  | 6.04 | 5.87 | 5.69 | 5.51 | 5.32 | 5.16 | 4.93 | 4.71 | 4.57 | 4.37 |
| 159.62  | 6.45  | 6.22 | 6.04 | 5.85 | 5.72 | 5.48 | 5.29 | 5.13 | 4.89 | 4.68 | 4.47 |
| 171.14  | 6.35  | 6.19 | 6.00 | 5.81 | 5.60 | 5.45 | 5.27 | 5.07 | 4.87 | 4.65 | 4.46 |
| 183.56  | 6.15  | 5.94 | 5.79 | 5.61 | 5.46 | 5.22 | 5.08 | 4.88 | 4.65 | 4.47 | 4.29 |
| 196.96  | 6.64  | 6.46 | 6.28 | 6.01 | 5.87 | 5.67 | 5.43 | 5.26 | 5.05 | 4.86 | 4.63 |
| 211.41  | 6.48  | 6.28 | 6.08 | 5.89 | 5.71 | 5.47 | 5.33 | 5.08 | 4.94 | 4.74 | 4.51 |
| 226.99  | 6.63  | 6.42 | 6.23 | 6.00 | 5.86 | 5.64 | 5.46 | 5.22 | 5.02 | 4.84 | 4.61 |
| 243.80  | 6.32  | 6.17 | 5.99 | 5.76 | 5.63 | 5.42 | 5.27 | 5.05 | 4.84 | 4.66 | 4.47 |
| 261.93  | 6.71  | 6.49 | 6.29 | 6.08 | 5.90 | 5.68 | 5.47 | 5.31 | 5.07 | 4.92 | 4.64 |
| 281.48  | 6.86  | 6.66 | 6.49 | 6.19 | 6.02 | 5.81 | 5.64 | 5.43 | 5.18 | 5.04 | 4.73 |
| 302.56  | 6.74  | 6.56 | 6.33 | 6.10 | 5.91 | 5.74 | 5.53 | 5.34 | 5.10 | 4.92 | 4.73 |
| 325.30  | 6.93  | 6.75 | 6.49 | 6.29 | 6.11 | 5.89 | 5.69 | 5.50 | 5.27 | 5.11 | 4.92 |
| 349.83  | 6.83  | 6.65 | 6.47 | 6.22 | 6.05 | 5.85 | 5.64 | 5.42 | 5.19 | 5.07 | 4.83 |
| 376.28  | 7.13  | 6.94 | 6.74 | 6.55 | 6.33 | 6.13 | 5.89 | 5.69 | 5.45 | 5.28 | 5.04 |
| 404.81  | 7.21  | 6.96 | 6.78 | 6.55 | 6.39 | 6.14 | 5.91 | 5.76 | 5.55 | 5.35 | 5.12 |
| 435.58  | 7.13  | 6.95 | 6.72 | 6.53 | 6.33 | 6.15 | 5.93 | 5.71 | 5.49 | 5.29 | 5.10 |
| 468.76  | 7.29  | 7.04 | 6.86 | 6.63 | 6.38 | 6.24 | 6.01 | 5.84 | 5.60 | 5.44 | 5.20 |
| 504.55  | 7.26  | 7.11 | 6.83 | 6.65 | 6.43 | 6.26 | 6.02 | 5.83 | 5.60 | 5.41 | 5.24 |
| 543.15  | 7.54  | 7.31 | 7.07 | 6.80 | 6.68 | 6.43 | 6.26 | 6.03 | 5.82 | 5.63 | 5.39 |
| 584.78  | 7.44  | 7.23 | 6.96 | 6.72 | 6.51 | 6.35 | 6.12 | 5.91 | 5.72 | 5.57 | 5.26 |
| 629.68  | 7.38  | 7.19 | 6.93 | 6.70 | 6.52 | 6.31 | 6.11 | 5.90 | 5.72 | 5.51 | 5.32 |
| 678.10  | 7.95  | 7.76 | 7.48 | 7.25 | 7.02 | 6.81 | 6.60 | 6.39 | 6.17 | 5.92 | 5.73 |
| 730.33  | 8.11  | 7.96 | 7.62 | 7.46 | 7.20 | 7.00 | 6.78 | 6.52 | 6.32 | 6.11 | 5.90 |
| 786.65  | 8.19  | 7.95 | 7.75 | 7.49 | 7.29 | 7.06 | 6.84 | 6.61 | 6.37 | 6.22 | 5.95 |
| 847.40  | 8.39  | 8.17 | 7.92 | 7.66 | 7.50 | 7.23 | 6.98 | 6.81 | 6.55 | 6.37 | 6.11 |
| 912.92  | 8.52  | 8.33 | 8.08 | 7.78 | 7.56 | 7.35 | 7.12 | 6.93 | 6.61 | 6.45 | 6.26 |
| 983.58  | 8.75  | 8.48 | 8.27 | 7.98 | 7.71 | 7.54 | 7.35 | 7.05 | 6.81 | 6.64 | 6.38 |
| 1059.78 | 8.88  | 8.63 | 8.35 | 8.07 | 7.89 | 7.64 | 7.40 | 7.19 | 6.95 | 6.72 | 6.52 |
| 1141.98 | 8.81  | 8.61 | 8.36 | 8.11 | 7.89 | 7.66 | 7.40 | 7.18 | 6.98 | 6.78 | 6.55 |
| 1230.62 | 8.58  | 8.37 | 8.06 | 7.84 | 7.67 | 7.40 | 7.19 | 7.02 | 6.75 | 6.60 | 6.37 |
| 1326.23 | 9.10  | 8.82 | 8.60 | 8.33 | 8.09 | 7.87 | 7.66 | 7.39 | 7.16 | 6.97 | 6.78 |
| 1429.34 | 9.62  | 9.36 | 9.10 | 8.80 | 8.60 | 8.34 | 8.11 | 7.85 | 7.63 | 7.42 | 7.20 |
| 1540.54 | 9.50  | 9.24 | 9.00 | 8.67 | 8.49 | 8.21 | 7.97 | 7.70 | 7.51 | 7.30 | 7.08 |
| 1660.48 | 9.67  | 9.43 | 9.20 | 8.88 | 8.65 | 8.42 | 8.16 | 8.01 | 7.71 | 7.51 | 7.30 |
| 1789.83 | 9.75  | 9.47 | 9.20 | 8.93 | 8.69 | 8.44 | 8.21 | 7.98 | 7.70 | 7.54 | 7.33 |
| 1929.34 | 9.94  | 9.70 | 9.38 | 9.11 | 8.84 | 8.62 | 8.36 | 8.12 | 7.95 | 7.70 | 7.49 |
| 2079.80 | 9.90  | 9.62 | 9.34 | 9.04 | 8.84 | 8.64 | 8.34 | 8.11 | 7.89 | 7.71 | 7.48 |
| 2242.08 | 10.05 | 9.77 | 9.48 | 9.21 | 8.94 | 8.73 | 8.50 | 8.23 | 8.06 | 7.86 | 7.61 |
| 2417.10 | 10.11 | 9.85 | 9.58 | 9.31 | 9.08 | 8.81 | 8.56 | 8.37 | 8.12 | 7.94 | 7.64 |
| 2605.85 | 10.02 | 9.76 | 9.48 | 9.18 | 8.99 | 8.72 | 8.51 | 8.26 | 8.03 | 7.87 | 7.59 |
| 2809.43 | 9.68  | 9.38 | 9.16 | 8.93 | 8.66 | 8.45 | 8.20 | 7.97 | 7.79 | 7.60 | 7.37 |
| 3028.99 | 10.13 | 9.81 | 9.55 | 9.33 | 9.04 | 8.80 | 8.60 | 8.35 | 8.08 | 7.89 | 7.69 |
| 3265.79 | 10.08 | 9.81 | 9.55 | 9.27 | 9.03 | 8.77 | 8.54 | 8.31 | 8.10 | 7.92 | 7.70 |
| 3521.18 | 10.06 | 9.82 | 9.56 | 9.28 | 9.11 | 8.80 | 8.57 | 8.35 | 8.11 | 7.93 | 7.72 |
| 3796.62 | 9.84  | 9.60 | 9.34 | 9.05 | 8.81 | 8.62 | 8.39 | 8.16 | 7.92 | 7.75 | 7.53 |

| Wavelength (nm) \ Time (ps) | 599.60 | 601.00 | 602.41 | 603.82 | 605.23 | 606.64 | 608.05 | 609.46 | 610.86 | 612.27 | 613.68 |
|-----------------------------|--------|--------|--------|--------|--------|--------|--------|--------|--------|--------|--------|
| -3.28                       | -0.02  | -0.03  | -0.02  | 0.01   | 0.01   | -0.03  | 0.02   | 0.02   | 0.00   | 0.04   | 0.02   |
| -2.78                       | -0.05  | -0.01  | -0.02  | -0.01  | -0.01  | 0.02   | 0.01   | -0.04  | 0.00   | 0.02   | 0.04   |
| -2.28                       | -0.01  | 0.00   | -0.01  | -0.03  | -0.06  | -0.04  | 0.00   | -0.03  | 0.00   | -0.03  | -0.01  |
| -1.78                       | 0.12   | 0.12   | 0.09   | 0.08   | 0.06   | 0.09   | 0.06   | 0.08   | 0.06   | 0.01   | 0.03   |
| -1.28                       | -0.05  | -0.04  | -0.05  | -0.06  | -0.03  | -0.03  | -0.03  | -0.04  | -0.02  | -0.02  | -0.02  |
| -0.78                       | -0.06  | -0.04  | -0.03  | -0.02  | 0.00   | -0.01  | 0.01   | -0.01  | 0.01   | 0.05   | 0.04   |
| -0.28                       | 0.00   | -0.01  | 0.01   | 0.01   | 0.02   | -0.02  | -0.02  | 0.01   | -0.02  | -0.02  | -0.05  |
| 0.22                        | 0.01   | 0.01   | 0.01   | -0.01  | -0.01  | 0.02   | -0.01  | 0.02   | -0.02  | -0.04  | -0.02  |
| 0.32                        | 0.03   | 0.03   | 0.01   | 0.00   | 0.03   | 0.00   | 0.01   | 0.00   | 0.00   | -0.01  | 0.01   |
| 0.42                        | 0.02   | -0.03  | 0.01   | 0.01   | -0.01  | 0.00   | -0.04  | -0.01  | 0.00   | 0.01   | -0.04  |
| 0.52                        | -0.02  | -0.01  | -0.05  | -0.03  | 0.00   | 0.01   | -0.05  | -0.03  | 0.02   | -0.02  | -0.03  |
| 0.62                        | 0.01   | -0.03  | 0.03   | 0.04   | -0.02  | -0.01  | -0.03  | -0.07  | -0.02  | 0.00   | -0.06  |
| 0.72                        | -0.03  | -0.05  | 0.01   | -0.07  | -0.05  | -0.05  | -0.08  | -0.05  | -0.08  | -0.07  | -0.06  |
| 0.77                        | -0.01  | 0.00   | 0.01   | 0.00   | 0.01   | -0.03  | -0.02  | -0.10  | -0.04  | -0.06  | -0.05  |
| 0.82                        | -0.07  | 0.01   | 0.02   | 0.01   | 0.02   | 0.01   | -0.03  | -0.02  | 0.02   | -0.02  | -0.03  |
| 0.87                        | 0.04   | 0.03   | 0.03   | 0.04   | 0.06   | 0.01   | 0.03   | 0.04   | 0.03   | 0.01   | 0.01   |
| 0.92                        | -0.12  | -0.12  | -0.14  | -0.13  | -0.09  | -0.13  | -0.11  | -0.12  | -0.12  | -0.09  | -0.09  |
| 0.97                        | 0.03   | 0.02   | 0.05   | 0.08   | 0.06   | 0.02   | 0.06   | 0.00   | 0.02   | 0.06   | 0.04   |
| 1.02                        | -0.01  | -0.07  | -0.04  | -0.03  | -0.04  | -0.01  | 0.00   | -0.02  | 0.03   | 0.00   | 0.01   |
| 1.07                        | 0.03   | 0.05   | 0.05   | 0.02   | 0.04   | -0.03  | 0.01   | -0.03  | 0.04   | -0.02  | -0.03  |
| 1.12                        | -0.10  | -0.08  | -0.07  | -0.06  | -0.04  | 0.00   | -0.01  | -0.04  | -0.05  | -0.01  | -0.02  |
| 1.17                        | -0.03  | -0.03  | -0.03  | -0.07  | -0.01  | -0.03  | -0.02  | -0.03  | -0.02  | -0.02  | 0.00   |
| 1.22                        | -0.07  | -0.10  | -0.08  | -0.05  | -0.10  | -0.08  | -0.05  | -0.11  | -0.06  | -0.03  | -0.07  |
| 1.27                        | 0.02   | 0.10   | 0.10   | 0.03   | 0.05   | 0.04   | 0.04   | 0.02   | 0.03   | 0.05   | 0.00   |
| 1.32                        | 0.06   | 0.04   | 0.05   | 0.07   | 0.10   | 0.07   | 0.07   | 0.01   | 0.05   | 0.06   | 0.00   |
| 1.37                        | -0.02  | 0.00   | -0.01  | -0.04  | -0.01  | -0.02  | -0.03  | -0.04  | -0.03  | -0.04  | -0.02  |
| 1.42                        | -0.06  | -0.08  | -0.06  | -0.05  | -0.07  | -0.05  | -0.03  | -0.05  | -0.01  | -0.05  | -0.03  |
| 1.47                        | -0.14  | -0.11  | -0.06  | -0.05  | -0.05  | -0.06  | -0.03  | -0.06  | -0.03  | -0.03  | -0.05  |
| 1.52                        | -0.19  | -0.16  | -0.14  | -0.12  | -0.12  | -0.10  | -0.05  | -0.06  | -0.03  | -0.07  | -0.07  |
| 1.57                        | 1.18   | 1.08   | 1.02   | 0.93   | 0.89   | 0.80   | 0.76   | 0.72   | 0.68   | 0.62   | 0.53   |
| 1.62                        | 5.46   | 5.23   | 4.99   | 4.78   | 4.64   | 4.43   | 4.26   | 4.08   | 3.96   | 3.77   | 3.63   |
| 1.67                        | 9.44   | 9.32   | 9.23   | 9.09   | 8.96   | 8.84   | 8.76   | 8.64   | 8.60   | 8.55   | 8.48   |
| 1.72                        | 9.42   | 9.43   | 9.47   | 9.41   | 9.39   | 9.40   | 9.37   | 9.32   | 9.39   | 9.37   | 9.37   |
| 1.77                        | 8.33   | 8.30   | 8.29   | 8.25   | 8.23   | 8.23   | 8.21   | 8.24   | 8.23   | 8.23   | 8.25   |
| 1.82                        | 7.28   | 7.25   | 7.19   | 7.13   | 7.10   | 7.08   | 7.02   | 7.02   | 7.03   | 7.05   | 7.03   |
| 1.87                        | 6.72   | 6.64   | 6.56   | 6.45   | 6.42   | 6.32   | 6.33   | 6.24   | 6.26   | 6.28   | 6.26   |
| 1.92                        | 6.53   | 6.47   | 6.36   | 6.28   | 6.20   | 6.09   | 6.07   | 6.01   | 6.01   | 5.94   | 5.91   |
| 1.97                        | 6.56   | 6.46   | 6.35   | 6.26   | 6.12   | 6.05   | 5.98   | 5.93   | 5.89   | 5.85   | 5.81   |
| 2.02                        | 6.53   | 6.39   | 6.25   | 6.18   | 6.06   | 5.94   | 5.91   | 5.75   | 5.76   | 5.71   | 5.63   |
| 2.07                        | 6.50   | 6.40   | 6.27   | 6.11   | 6.04   | 5.92   | 5.85   | 5.74   | 5.76   | 5.66   | 5.59   |
| 2.12                        | 6.76   | 6.60   | 6.52   | 6.37   | 6.21   | 6.12   | 5.97   | 5.88   | 5.82   | 5.77   | 5.66   |
| 2.17                        | 6.46   | 6.27   | 6.13   | 6.00   | 5.90   | 5.76   | 5.67   | 5.54   | 5.42   | 5.37   | 5.28   |
| 2.22                        | 6.39   | 6.22   | 6.08   | 5.93   | 5.87   | 5.64   | 5.57   | 5.45   | 5.37   | 5.30   | 5.21   |
| 2.27                        | 6.35   | 6.26   | 6.06   | 5.92   | 5.79   | 5.62   | 5.50   | 5.43   | 5.33   | 5.25   | 5.21   |
| 2.32                        | 6.21   | 6.09   | 5.94   | 5.79   | 5.63   | 5.51   | 5.45   | 5.26   | 5.20   | 5.07   | 5.07   |
| 2.37                        | 6.43   | 6.28   | 6.13   | 5.97   | 5.84   | 5.70   | 5.58   | 5.43   | 5.37   | 5.24   | 5.18   |
| 2.42                        | 6.38   | 6.16   | 6.03   | 5.90   | 5.71   | 5.58   | 5.46   | 5.28   | 5.21   | 5.09   | 5.01   |

|      |      |      |      |      |      |      |      |      |      |      |      |
|------|------|------|------|------|------|------|------|------|------|------|------|
| 2.47 | 6.03 | 5.94 | 5.75 | 5.60 | 5.43 | 5.28 | 5.17 | 5.00 | 4.96 | 4.81 | 4.73 |
| 2.52 | 6.29 | 6.11 | 6.03 | 5.83 | 5.66 | 5.52 | 5.38 | 5.21 | 5.11 | 5.03 | 4.90 |
| 2.57 | 6.17 | 5.98 | 5.83 | 5.67 | 5.50 | 5.37 | 5.20 | 5.06 | 4.99 | 4.85 | 4.76 |
| 2.62 | 6.15 | 6.00 | 5.81 | 5.66 | 5.45 | 5.31 | 5.17 | 5.00 | 4.87 | 4.81 | 4.70 |
| 2.67 | 6.00 | 5.82 | 5.63 | 5.49 | 5.34 | 5.16 | 5.05 | 4.89 | 4.82 | 4.74 | 4.61 |
| 2.72 | 6.10 | 5.92 | 5.74 | 5.60 | 5.39 | 5.23 | 5.10 | 4.95 | 4.83 | 4.70 | 4.58 |
| 2.77 | 6.19 | 6.05 | 5.87 | 5.69 | 5.52 | 5.29 | 5.19 | 4.99 | 4.86 | 4.74 | 4.66 |
| 2.82 | 6.02 | 5.93 | 5.74 | 5.54 | 5.39 | 5.17 | 5.04 | 4.92 | 4.80 | 4.67 | 4.57 |
| 2.87 | 6.05 | 5.87 | 5.64 | 5.45 | 5.31 | 5.16 | 5.01 | 4.85 | 4.76 | 4.62 | 4.48 |
| 2.92 | 6.06 | 5.88 | 5.73 | 5.51 | 5.32 | 5.15 | 5.06 | 4.85 | 4.71 | 4.60 | 4.46 |
| 2.97 | 6.03 | 5.80 | 5.67 | 5.48 | 5.29 | 5.16 | 5.02 | 4.88 | 4.77 | 4.64 | 4.50 |
| 3.02 | 6.21 | 6.01 | 5.81 | 5.64 | 5.53 | 5.26 | 5.13 | 4.93 | 4.81 | 4.69 | 4.54 |
| 3.07 | 6.07 | 5.92 | 5.73 | 5.54 | 5.38 | 5.21 | 4.99 | 4.83 | 4.72 | 4.58 | 4.44 |
| 3.12 | 6.22 | 6.06 | 5.84 | 5.63 | 5.43 | 5.31 | 5.10 | 4.92 | 4.81 | 4.65 | 4.52 |
| 3.17 | 6.23 | 6.04 | 5.83 | 5.66 | 5.50 | 5.31 | 5.13 | 4.97 | 4.79 | 4.71 | 4.54 |
| 3.22 | 6.07 | 5.92 | 5.73 | 5.51 | 5.32 | 5.17 | 5.01 | 4.84 | 4.69 | 4.56 | 4.41 |
| 3.27 | 5.95 | 5.77 | 5.58 | 5.39 | 5.20 | 4.98 | 4.86 | 4.69 | 4.54 | 4.41 | 4.25 |
| 3.32 | 6.21 | 5.98 | 5.80 | 5.62 | 5.41 | 5.20 | 5.03 | 4.86 | 4.71 | 4.56 | 4.42 |
| 3.37 | 5.89 | 5.71 | 5.56 | 5.33 | 5.17 | 5.01 | 4.81 | 4.66 | 4.54 | 4.41 | 4.27 |
| 3.42 | 6.06 | 5.87 | 5.71 | 5.53 | 5.33 | 5.12 | 4.94 | 4.76 | 4.64 | 4.49 | 4.34 |
| 3.47 | 6.09 | 5.87 | 5.71 | 5.50 | 5.30 | 5.11 | 4.94 | 4.78 | 4.63 | 4.51 | 4.33 |
| 3.52 | 5.91 | 5.70 | 5.52 | 5.26 | 5.14 | 4.94 | 4.81 | 4.60 | 4.43 | 4.34 | 4.17 |
| 3.57 | 5.74 | 5.52 | 5.38 | 5.16 | 4.97 | 4.81 | 4.66 | 4.47 | 4.37 | 4.21 | 4.12 |
| 3.62 | 5.82 | 5.60 | 5.47 | 5.22 | 5.05 | 4.87 | 4.70 | 4.52 | 4.39 | 4.24 | 4.06 |
| 3.67 | 5.70 | 5.52 | 5.33 | 5.16 | 4.97 | 4.82 | 4.67 | 4.49 | 4.32 | 4.22 | 4.06 |
| 3.72 | 5.79 | 5.62 | 5.43 | 5.25 | 5.03 | 4.87 | 4.72 | 4.47 | 4.36 | 4.22 | 4.06 |
| 3.92 | 6.01 | 5.83 | 5.60 | 5.39 | 5.22 | 5.03 | 4.83 | 4.62 | 4.52 | 4.35 | 4.20 |
| 4.12 | 5.78 | 5.55 | 5.43 | 5.20 | 5.00 | 4.85 | 4.65 | 4.46 | 4.32 | 4.19 | 4.02 |
| 4.32 | 5.51 | 5.33 | 5.15 | 4.90 | 4.76 | 4.53 | 4.35 | 4.22 | 4.05 | 3.90 | 3.81 |
| 4.52 | 5.65 | 5.40 | 5.24 | 5.00 | 4.81 | 4.66 | 4.45 | 4.28 | 4.12 | 3.99 | 3.87 |
| 4.72 | 5.55 | 5.36 | 5.13 | 4.98 | 4.79 | 4.63 | 4.40 | 4.26 | 4.10 | 3.92 | 3.83 |
| 4.92 | 5.65 | 5.49 | 5.26 | 5.09 | 4.91 | 4.68 | 4.51 | 4.32 | 4.17 | 4.01 | 3.83 |
| 5.12 | 5.49 | 5.25 | 5.05 | 4.89 | 4.64 | 4.48 | 4.29 | 4.10 | 3.91 | 3.82 | 3.68 |
| 5.32 | 5.61 | 5.47 | 5.22 | 5.03 | 4.80 | 4.59 | 4.41 | 4.24 | 4.10 | 3.91 | 3.72 |
| 5.52 | 5.53 | 5.29 | 5.12 | 4.92 | 4.70 | 4.47 | 4.27 | 4.09 | 3.93 | 3.74 | 3.61 |
| 5.72 | 5.54 | 5.30 | 5.14 | 4.87 | 4.73 | 4.51 | 4.28 | 4.10 | 3.92 | 3.74 | 3.60 |
| 5.92 | 5.35 | 5.12 | 4.95 | 4.80 | 4.54 | 4.40 | 4.22 | 3.99 | 3.89 | 3.69 | 3.54 |
| 6.12 | 5.43 | 5.25 | 4.98 | 4.85 | 4.61 | 4.41 | 4.28 | 4.04 | 3.90 | 3.76 | 3.57 |
| 6.32 | 5.32 | 5.13 | 4.92 | 4.73 | 4.50 | 4.32 | 4.05 | 3.95 | 3.82 | 3.63 | 3.50 |
| 6.52 | 5.25 | 5.06 | 4.82 | 4.61 | 4.42 | 4.21 | 4.09 | 3.82 | 3.69 | 3.55 | 3.35 |
| 6.72 | 5.47 | 5.28 | 5.02 | 4.83 | 4.64 | 4.44 | 4.23 | 3.99 | 3.87 | 3.70 | 3.52 |
| 6.92 | 5.25 | 5.08 | 4.87 | 4.65 | 4.51 | 4.26 | 4.09 | 3.89 | 3.76 | 3.57 | 3.42 |
| 7.12 | 5.15 | 4.99 | 4.82 | 4.56 | 4.37 | 4.18 | 4.01 | 3.82 | 3.65 | 3.50 | 3.35 |
| 7.32 | 5.35 | 5.15 | 4.92 | 4.75 | 4.56 | 4.32 | 4.10 | 3.93 | 3.73 | 3.57 | 3.43 |
| 7.52 | 5.21 | 5.02 | 4.81 | 4.62 | 4.40 | 4.20 | 4.02 | 3.80 | 3.63 | 3.49 | 3.35 |
| 7.72 | 5.22 | 5.06 | 4.79 | 4.60 | 4.39 | 4.17 | 4.01 | 3.73 | 3.61 | 3.51 | 3.30 |
| 7.92 | 5.11 | 4.90 | 4.69 | 4.44 | 4.25 | 4.09 | 3.85 | 3.70 | 3.52 | 3.36 | 3.18 |
| 8.12 | 5.15 | 4.92 | 4.70 | 4.52 | 4.28 | 4.08 | 3.91 | 3.74 | 3.54 | 3.38 | 3.23 |
| 8.32 | 5.05 | 4.84 | 4.68 | 4.44 | 4.25 | 4.02 | 3.88 | 3.65 | 3.46 | 3.37 | 3.16 |
| 8.52 | 5.01 | 4.81 | 4.62 | 4.39 | 4.22 | 4.00 | 3.84 | 3.70 | 3.50 | 3.34 | 3.21 |

|       |      |      |      |      |      |      |      |      |      |      |      |
|-------|------|------|------|------|------|------|------|------|------|------|------|
| 8.72  | 5.27 | 5.02 | 4.85 | 4.62 | 4.44 | 4.26 | 4.03 | 3.85 | 3.68 | 3.57 | 3.38 |
| 8.92  | 4.98 | 4.81 | 4.62 | 4.41 | 4.22 | 4.02 | 3.81 | 3.64 | 3.53 | 3.38 | 3.21 |
| 9.12  | 5.06 | 4.91 | 4.68 | 4.45 | 4.26 | 4.07 | 3.88 | 3.64 | 3.51 | 3.33 | 3.17 |
| 9.32  | 4.79 | 4.56 | 4.38 | 4.22 | 4.03 | 3.82 | 3.64 | 3.45 | 3.32 | 3.18 | 3.02 |
| 9.52  | 5.01 | 4.80 | 4.59 | 4.38 | 4.22 | 3.99 | 3.82 | 3.63 | 3.49 | 3.37 | 3.16 |
| 9.72  | 4.89 | 4.71 | 4.51 | 4.35 | 4.12 | 3.89 | 3.73 | 3.53 | 3.36 | 3.26 | 3.06 |
| 9.92  | 4.92 | 4.75 | 4.52 | 4.30 | 4.13 | 3.92 | 3.74 | 3.50 | 3.36 | 3.20 | 3.05 |
| 10.12 | 5.08 | 4.85 | 4.65 | 4.44 | 4.21 | 4.01 | 3.82 | 3.65 | 3.50 | 3.31 | 3.19 |
| 10.32 | 4.67 | 4.48 | 4.26 | 4.10 | 3.90 | 3.69 | 3.51 | 3.37 | 3.20 | 3.07 | 2.89 |
| 10.52 | 4.87 | 4.71 | 4.50 | 4.30 | 4.14 | 3.98 | 3.72 | 3.54 | 3.42 | 3.28 | 3.05 |
| 10.72 | 4.92 | 4.67 | 4.49 | 4.32 | 4.09 | 3.85 | 3.68 | 3.52 | 3.32 | 3.15 | 3.02 |
| 10.92 | 4.84 | 4.60 | 4.41 | 4.22 | 4.03 | 3.79 | 3.63 | 3.46 | 3.31 | 3.14 | 2.99 |
| 11.12 | 4.78 | 4.56 | 4.41 | 4.20 | 4.02 | 3.81 | 3.62 | 3.45 | 3.32 | 3.10 | 2.98 |
| 11.32 | 4.83 | 4.65 | 4.40 | 4.22 | 4.00 | 3.82 | 3.59 | 3.39 | 3.25 | 3.09 | 2.94 |
| 11.52 | 4.70 | 4.53 | 4.32 | 4.10 | 3.87 | 3.71 | 3.55 | 3.35 | 3.19 | 3.06 | 2.92 |
| 11.72 | 4.72 | 4.54 | 4.36 | 4.15 | 3.97 | 3.73 | 3.59 | 3.36 | 3.22 | 3.04 | 2.91 |
| 11.92 | 4.68 | 4.50 | 4.29 | 4.11 | 3.91 | 3.75 | 3.59 | 3.40 | 3.24 | 3.05 | 2.96 |
| 12.12 | 4.95 | 4.72 | 4.51 | 4.29 | 4.07 | 3.92 | 3.75 | 3.55 | 3.40 | 3.19 | 3.07 |
| 12.32 | 4.75 | 4.55 | 4.35 | 4.11 | 3.95 | 3.74 | 3.61 | 3.39 | 3.21 | 3.08 | 2.92 |
| 12.52 | 4.55 | 4.42 | 4.21 | 3.99 | 3.77 | 3.60 | 3.41 | 3.26 | 3.08 | 2.90 | 2.78 |
| 12.72 | 4.56 | 4.37 | 4.18 | 3.98 | 3.76 | 3.56 | 3.40 | 3.21 | 3.06 | 2.90 | 2.77 |
| 12.92 | 4.73 | 4.56 | 4.35 | 4.16 | 3.92 | 3.73 | 3.59 | 3.32 | 3.20 | 3.06 | 2.88 |
| 13.12 | 4.60 | 4.38 | 4.25 | 4.02 | 3.85 | 3.65 | 3.45 | 3.27 | 3.13 | 2.99 | 2.84 |
| 13.32 | 4.76 | 4.62 | 4.36 | 4.16 | 3.97 | 3.84 | 3.65 | 3.46 | 3.31 | 3.15 | 3.02 |
| 13.52 | 4.51 | 4.30 | 4.12 | 3.94 | 3.74 | 3.58 | 3.39 | 3.18 | 3.09 | 2.91 | 2.77 |
| 13.72 | 4.67 | 4.50 | 4.29 | 4.08 | 3.85 | 3.67 | 3.47 | 3.29 | 3.10 | 2.95 | 2.76 |
| 13.92 | 4.55 | 4.35 | 4.18 | 3.93 | 3.76 | 3.53 | 3.41 | 3.20 | 3.03 | 2.90 | 2.79 |
| 14.00 | 4.79 | 4.56 | 4.35 | 4.14 | 3.91 | 3.73 | 3.56 | 3.32 | 3.17 | 2.99 | 2.86 |
| 14.08 | 4.71 | 4.52 | 4.31 | 4.06 | 3.89 | 3.71 | 3.53 | 3.34 | 3.19 | 3.03 | 2.91 |
| 14.17 | 4.60 | 4.34 | 4.13 | 3.97 | 3.74 | 3.61 | 3.43 | 3.23 | 3.06 | 2.92 | 2.78 |
| 14.27 | 4.52 | 4.36 | 4.16 | 3.97 | 3.74 | 3.58 | 3.40 | 3.25 | 3.10 | 2.91 | 2.75 |
| 14.38 | 4.54 | 4.34 | 4.15 | 3.95 | 3.80 | 3.60 | 3.39 | 3.19 | 3.08 | 2.94 | 2.77 |
| 14.49 | 4.42 | 4.21 | 4.07 | 3.83 | 3.61 | 3.47 | 3.26 | 3.09 | 2.99 | 2.78 | 2.68 |
| 14.61 | 4.51 | 4.35 | 4.20 | 3.98 | 3.73 | 3.58 | 3.38 | 3.22 | 3.05 | 2.93 | 2.77 |
| 14.75 | 4.53 | 4.37 | 4.18 | 4.00 | 3.80 | 3.60 | 3.43 | 3.24 | 3.13 | 2.93 | 2.81 |
| 14.89 | 4.78 | 4.56 | 4.38 | 4.12 | 3.95 | 3.74 | 3.57 | 3.37 | 3.20 | 3.05 | 2.84 |
| 15.05 | 4.45 | 4.24 | 4.09 | 3.88 | 3.71 | 3.50 | 3.31 | 3.15 | 2.93 | 2.77 | 2.68 |
| 15.21 | 4.52 | 4.33 | 4.10 | 3.92 | 3.71 | 3.52 | 3.36 | 3.15 | 3.04 | 2.83 | 2.66 |
| 15.39 | 4.44 | 4.19 | 4.08 | 3.81 | 3.64 | 3.39 | 3.28 | 3.10 | 2.93 | 2.82 | 2.65 |
| 15.59 | 4.55 | 4.36 | 4.16 | 3.96 | 3.75 | 3.59 | 3.40 | 3.23 | 3.04 | 2.96 | 2.83 |
| 15.80 | 4.67 | 4.48 | 4.29 | 4.06 | 3.90 | 3.74 | 3.52 | 3.28 | 3.13 | 2.98 | 2.82 |
| 16.02 | 4.38 | 4.21 | 4.06 | 3.83 | 3.66 | 3.45 | 3.28 | 3.10 | 2.96 | 2.85 | 2.66 |
| 16.27 | 4.56 | 4.43 | 4.23 | 3.98 | 3.79 | 3.59 | 3.44 | 3.26 | 3.09 | 2.93 | 2.76 |
| 16.53 | 4.48 | 4.25 | 4.08 | 3.86 | 3.71 | 3.51 | 3.34 | 3.16 | 3.00 | 2.88 | 2.73 |
| 16.81 | 4.39 | 4.22 | 4.00 | 3.81 | 3.65 | 3.47 | 3.31 | 3.12 | 2.99 | 2.80 | 2.69 |
| 17.12 | 4.58 | 4.34 | 4.21 | 3.97 | 3.79 | 3.55 | 3.39 | 3.23 | 3.05 | 2.87 | 2.70 |
| 17.45 | 4.37 | 4.20 | 4.02 | 3.86 | 3.64 | 3.47 | 3.31 | 3.09 | 2.96 | 2.80 | 2.67 |
| 17.81 | 4.65 | 4.45 | 4.28 | 4.04 | 3.85 | 3.65 | 3.45 | 3.26 | 3.16 | 3.01 | 2.81 |
| 18.19 | 4.54 | 4.34 | 4.17 | 3.91 | 3.69 | 3.51 | 3.36 | 3.16 | 2.99 | 2.84 | 2.68 |
| 18.60 | 4.55 | 4.36 | 4.15 | 3.96 | 3.74 | 3.57 | 3.40 | 3.17 | 3.04 | 2.88 | 2.77 |



|        |      |      |      |      |      |      |      |      |      |      |      |
|--------|------|------|------|------|------|------|------|------|------|------|------|
| 19.05  | 4.51 | 4.30 | 4.11 | 3.89 | 3.69 | 3.53 | 3.34 | 3.14 | 3.01 | 2.84 | 2.68 |
| 19.53  | 4.50 | 4.22 | 4.08 | 3.87 | 3.71 | 3.49 | 3.32 | 3.14 | 2.99 | 2.83 | 2.72 |
| 20.05  | 4.37 | 4.21 | 4.04 | 3.84 | 3.63 | 3.41 | 3.27 | 3.10 | 2.93 | 2.79 | 2.64 |
| 20.61  | 4.42 | 4.24 | 3.99 | 3.80 | 3.59 | 3.38 | 3.23 | 3.02 | 2.87 | 2.72 | 2.56 |
| 21.22  | 4.34 | 4.11 | 3.94 | 3.71 | 3.55 | 3.34 | 3.15 | 2.99 | 2.83 | 2.69 | 2.53 |
| 21.87  | 4.38 | 4.17 | 4.00 | 3.79 | 3.61 | 3.43 | 3.19 | 3.06 | 2.92 | 2.79 | 2.63 |
| 22.57  | 4.39 | 4.14 | 3.98 | 3.81 | 3.56 | 3.35 | 3.20 | 2.99 | 2.87 | 2.70 | 2.57 |
| 23.33  | 4.46 | 4.25 | 4.03 | 3.82 | 3.64 | 3.49 | 3.29 | 3.12 | 2.98 | 2.82 | 2.67 |
| 24.15  | 4.19 | 4.01 | 3.82 | 3.62 | 3.42 | 3.25 | 3.05 | 2.88 | 2.75 | 2.62 | 2.45 |
| 25.03  | 4.27 | 4.01 | 3.91 | 3.69 | 3.50 | 3.35 | 3.14 | 2.99 | 2.84 | 2.66 | 2.53 |
| 25.98  | 4.43 | 4.26 | 4.04 | 3.83 | 3.64 | 3.44 | 3.25 | 3.10 | 2.93 | 2.79 | 2.58 |
| 27.01  | 4.21 | 4.07 | 3.86 | 3.63 | 3.49 | 3.27 | 3.13 | 2.92 | 2.83 | 2.65 | 2.49 |
| 28.11  | 4.39 | 4.15 | 3.97 | 3.73 | 3.55 | 3.34 | 3.18 | 2.98 | 2.82 | 2.66 | 2.56 |
| 29.30  | 4.28 | 4.10 | 3.90 | 3.75 | 3.50 | 3.32 | 3.18 | 2.95 | 2.83 | 2.70 | 2.52 |
| 30.59  | 4.20 | 3.98 | 3.83 | 3.64 | 3.42 | 3.24 | 3.06 | 2.92 | 2.74 | 2.59 | 2.45 |
| 31.98  | 4.15 | 4.00 | 3.79 | 3.62 | 3.42 | 3.25 | 3.11 | 2.92 | 2.80 | 2.60 | 2.54 |
| 33.47  | 4.21 | 4.03 | 3.79 | 3.59 | 3.46 | 3.26 | 3.06 | 2.89 | 2.76 | 2.60 | 2.47 |
| 35.09  | 4.17 | 3.99 | 3.79 | 3.59 | 3.38 | 3.19 | 3.04 | 2.87 | 2.74 | 2.58 | 2.45 |
| 36.83  | 4.27 | 4.10 | 3.88 | 3.71 | 3.54 | 3.35 | 3.17 | 2.97 | 2.83 | 2.67 | 2.54 |
| 38.71  | 4.09 | 3.94 | 3.70 | 3.50 | 3.31 | 3.13 | 2.97 | 2.80 | 2.58 | 2.45 | 2.33 |
| 40.73  | 4.09 | 3.89 | 3.72 | 3.50 | 3.34 | 3.18 | 2.98 | 2.82 | 2.66 | 2.52 | 2.39 |
| 42.92  | 4.08 | 3.87 | 3.68 | 3.52 | 3.32 | 3.15 | 2.94 | 2.76 | 2.64 | 2.49 | 2.33 |
| 45.27  | 4.01 | 3.81 | 3.65 | 3.47 | 3.29 | 3.05 | 2.95 | 2.75 | 2.62 | 2.48 | 2.34 |
| 47.81  | 4.10 | 3.93 | 3.74 | 3.51 | 3.30 | 3.16 | 2.99 | 2.83 | 2.65 | 2.53 | 2.35 |
| 50.55  | 3.97 | 3.80 | 3.60 | 3.44 | 3.29 | 3.11 | 2.94 | 2.74 | 2.65 | 2.47 | 2.33 |
| 53.51  | 4.24 | 4.04 | 3.84 | 3.65 | 3.43 | 3.23 | 3.09 | 2.89 | 2.73 | 2.58 | 2.42 |
| 56.69  | 4.11 | 3.95 | 3.76 | 3.58 | 3.37 | 3.22 | 3.03 | 2.87 | 2.74 | 2.57 | 2.45 |
| 60.13  | 4.06 | 3.88 | 3.69 | 3.45 | 3.28 | 3.13 | 2.92 | 2.74 | 2.63 | 2.49 | 2.34 |
| 63.84  | 4.14 | 4.00 | 3.76 | 3.58 | 3.39 | 3.19 | 3.02 | 2.81 | 2.69 | 2.48 | 2.32 |
| 67.83  | 4.10 | 3.93 | 3.72 | 3.48 | 3.31 | 3.16 | 2.98 | 2.74 | 2.69 | 2.47 | 2.37 |
| 72.15  | 4.15 | 3.98 | 3.77 | 3.57 | 3.41 | 3.24 | 3.04 | 2.83 | 2.70 | 2.61 | 2.42 |
| 76.80  | 3.98 | 3.87 | 3.68 | 3.45 | 3.26 | 3.07 | 2.95 | 2.72 | 2.60 | 2.48 | 2.33 |
| 81.81  | 4.12 | 3.91 | 3.77 | 3.55 | 3.37 | 3.19 | 3.02 | 2.83 | 2.63 | 2.48 | 2.32 |
| 87.22  | 4.00 | 3.82 | 3.66 | 3.43 | 3.24 | 3.07 | 2.88 | 2.71 | 2.54 | 2.41 | 2.26 |
| 93.06  | 4.10 | 3.94 | 3.72 | 3.51 | 3.36 | 3.16 | 2.96 | 2.78 | 2.66 | 2.48 | 2.41 |
| 99.35  | 4.17 | 3.99 | 3.82 | 3.62 | 3.41 | 3.24 | 3.09 | 2.85 | 2.73 | 2.60 | 2.41 |
| 106.13 | 4.18 | 3.99 | 3.80 | 3.55 | 3.36 | 3.20 | 3.01 | 2.84 | 2.64 | 2.49 | 2.37 |
| 113.45 | 4.25 | 4.06 | 3.90 | 3.67 | 3.43 | 3.25 | 3.13 | 2.93 | 2.76 | 2.55 | 2.38 |
| 121.34 | 4.13 | 3.99 | 3.79 | 3.61 | 3.42 | 3.26 | 3.04 | 2.88 | 2.74 | 2.60 | 2.46 |
| 129.86 | 4.11 | 3.93 | 3.74 | 3.53 | 3.35 | 3.13 | 2.99 | 2.77 | 2.65 | 2.49 | 2.38 |
| 139.04 | 4.14 | 3.92 | 3.75 | 3.55 | 3.33 | 3.20 | 3.00 | 2.77 | 2.63 | 2.51 | 2.36 |
| 148.94 | 4.16 | 3.99 | 3.81 | 3.60 | 3.40 | 3.23 | 3.11 | 2.94 | 2.78 | 2.61 | 2.53 |
| 159.62 | 4.30 | 4.08 | 3.87 | 3.64 | 3.51 | 3.26 | 3.09 | 2.93 | 2.81 | 2.61 | 2.46 |
| 171.14 | 4.27 | 4.08 | 3.87 | 3.68 | 3.50 | 3.35 | 3.16 | 2.94 | 2.85 | 2.65 | 2.52 |
| 183.56 | 4.06 | 3.84 | 3.68 | 3.51 | 3.29 | 3.11 | 2.98 | 2.78 | 2.63 | 2.52 | 2.42 |
| 196.96 | 4.45 | 4.19 | 4.04 | 3.84 | 3.67 | 3.48 | 3.30 | 3.15 | 2.95 | 2.78 | 2.62 |
| 211.41 | 4.29 | 4.14 | 3.90 | 3.72 | 3.55 | 3.37 | 3.13 | 3.02 | 2.84 | 2.70 | 2.56 |
| 226.99 | 4.37 | 4.23 | 3.99 | 3.80 | 3.59 | 3.45 | 3.21 | 3.07 | 2.92 | 2.74 | 2.63 |
| 243.80 | 4.27 | 4.10 | 3.92 | 3.73 | 3.55 | 3.37 | 3.22 | 3.03 | 2.89 | 2.76 | 2.60 |
| 261.93 | 4.47 | 4.29 | 4.08 | 3.85 | 3.68 | 3.51 | 3.35 | 3.11 | 2.99 | 2.85 | 2.70 |

|         |      |      |      |      |      |      |      |      |      |      |      |
|---------|------|------|------|------|------|------|------|------|------|------|------|
| 281.48  | 4.55 | 4.39 | 4.17 | 4.00 | 3.81 | 3.60 | 3.42 | 3.23 | 3.08 | 2.91 | 2.78 |
| 302.56  | 4.52 | 4.32 | 4.17 | 3.95 | 3.74 | 3.54 | 3.37 | 3.20 | 3.05 | 2.90 | 2.77 |
| 325.30  | 4.66 | 4.47 | 4.31 | 4.06 | 3.89 | 3.68 | 3.48 | 3.31 | 3.16 | 3.02 | 2.86 |
| 349.83  | 4.64 | 4.43 | 4.19 | 4.04 | 3.82 | 3.66 | 3.55 | 3.32 | 3.16 | 3.00 | 2.83 |
| 376.28  | 4.85 | 4.67 | 4.43 | 4.28 | 4.07 | 3.89 | 3.71 | 3.50 | 3.36 | 3.20 | 3.07 |
| 404.81  | 4.94 | 4.68 | 4.50 | 4.29 | 4.10 | 3.89 | 3.72 | 3.58 | 3.39 | 3.21 | 3.08 |
| 435.58  | 4.83 | 4.64 | 4.47 | 4.30 | 4.09 | 3.88 | 3.70 | 3.55 | 3.36 | 3.23 | 3.10 |
| 468.76  | 5.00 | 4.83 | 4.64 | 4.45 | 4.23 | 4.05 | 3.91 | 3.69 | 3.53 | 3.33 | 3.22 |
| 504.55  | 5.02 | 4.79 | 4.64 | 4.43 | 4.28 | 4.07 | 3.92 | 3.77 | 3.59 | 3.48 | 3.31 |
| 543.15  | 5.17 | 4.98 | 4.82 | 4.60 | 4.45 | 4.25 | 4.05 | 3.91 | 3.74 | 3.61 | 3.46 |
| 584.78  | 5.08 | 4.94 | 4.74 | 4.58 | 4.39 | 4.20 | 4.02 | 3.82 | 3.71 | 3.58 | 3.45 |
| 629.68  | 5.10 | 4.92 | 4.77 | 4.56 | 4.38 | 4.21 | 4.04 | 3.87 | 3.77 | 3.61 | 3.48 |
| 678.10  | 5.49 | 5.34 | 5.08 | 4.93 | 4.70 | 4.52 | 4.36 | 4.20 | 4.06 | 3.89 | 3.78 |
| 730.33  | 5.69 | 5.52 | 5.34 | 5.09 | 4.91 | 4.72 | 4.54 | 4.35 | 4.26 | 4.10 | 3.93 |
| 786.65  | 5.79 | 5.59 | 5.40 | 5.21 | 4.98 | 4.84 | 4.66 | 4.55 | 4.34 | 4.20 | 4.01 |
| 847.40  | 5.92 | 5.75 | 5.54 | 5.36 | 5.16 | 4.97 | 4.85 | 4.65 | 4.54 | 4.40 | 4.23 |
| 912.92  | 6.04 | 5.86 | 5.64 | 5.48 | 5.30 | 5.09 | 4.94 | 4.79 | 4.62 | 4.50 | 4.37 |
| 983.58  | 6.23 | 6.01 | 5.82 | 5.66 | 5.47 | 5.31 | 5.13 | 4.98 | 4.85 | 4.66 | 4.50 |
| 1059.78 | 6.32 | 6.12 | 5.94 | 5.72 | 5.54 | 5.39 | 5.22 | 5.05 | 4.90 | 4.73 | 4.58 |
| 1141.98 | 6.32 | 6.14 | 5.92 | 5.78 | 5.57 | 5.46 | 5.28 | 5.07 | 4.96 | 4.80 | 4.72 |
| 1230.62 | 6.19 | 6.00 | 5.84 | 5.67 | 5.48 | 5.32 | 5.17 | 4.99 | 4.84 | 4.75 | 4.58 |
| 1326.23 | 6.57 | 6.36 | 6.17 | 6.02 | 5.83 | 5.68 | 5.47 | 5.34 | 5.17 | 5.06 | 4.89 |
| 1429.34 | 7.00 | 6.78 | 6.60 | 6.42 | 6.25 | 6.07 | 5.93 | 5.77 | 5.59 | 5.47 | 5.38 |
| 1540.54 | 6.86 | 6.69 | 6.46 | 6.31 | 6.13 | 5.98 | 5.75 | 5.62 | 5.52 | 5.37 | 5.22 |
| 1660.48 | 7.07 | 6.90 | 6.69 | 6.50 | 6.34 | 6.20 | 6.03 | 5.88 | 5.71 | 5.58 | 5.48 |
| 1789.83 | 7.10 | 6.91 | 6.77 | 6.55 | 6.42 | 6.25 | 6.12 | 5.93 | 5.81 | 5.71 | 5.56 |
| 1929.34 | 7.27 | 7.07 | 6.92 | 6.74 | 6.58 | 6.37 | 6.23 | 6.02 | 5.92 | 5.76 | 5.66 |
| 2079.80 | 7.27 | 7.08 | 6.95 | 6.74 | 6.60 | 6.41 | 6.29 | 6.08 | 5.96 | 5.85 | 5.71 |
| 2242.08 | 7.41 | 7.24 | 7.02 | 6.84 | 6.67 | 6.58 | 6.44 | 6.31 | 6.12 | 6.00 | 5.89 |
| 2417.10 | 7.51 | 7.33 | 7.13 | 7.00 | 6.80 | 6.67 | 6.52 | 6.36 | 6.25 | 6.15 | 5.98 |
| 2605.85 | 7.43 | 7.24 | 7.08 | 6.90 | 6.76 | 6.61 | 6.47 | 6.31 | 6.20 | 6.11 | 5.90 |
| 2809.43 | 7.19 | 7.04 | 6.83 | 6.71 | 6.57 | 6.45 | 6.30 | 6.17 | 6.06 | 5.96 | 5.84 |
| 3028.99 | 7.49 | 7.34 | 7.17 | 6.98 | 6.87 | 6.71 | 6.60 | 6.44 | 6.35 | 6.23 | 6.11 |
| 3265.79 | 7.48 | 7.32 | 7.17 | 7.02 | 6.91 | 6.73 | 6.57 | 6.44 | 6.34 | 6.22 | 6.08 |
| 3521.18 | 7.54 | 7.38 | 7.17 | 7.01 | 6.88 | 6.73 | 6.59 | 6.46 | 6.36 | 6.24 | 6.14 |
| 3796.62 | 7.34 | 7.19 | 7.04 | 6.90 | 6.78 | 6.60 | 6.53 | 6.43 | 6.29 | 6.21 | 6.11 |

| Wavelength (nm) \ Time (ps) | 615.09 | 616.50 | 617.91 | 619.32 | 620.72 | 622.13 | 623.54 | 624.95 | 626.36 | 627.77 | 629.18 |
|-----------------------------|--------|--------|--------|--------|--------|--------|--------|--------|--------|--------|--------|
| -3.28                       | 0.03   | 0.03   | 0.06   | 0.10   | 0.11   | 0.09   | 0.10   | 0.12   | 0.11   | 0.11   | 0.13   |
| -2.78                       | 0.05   | 0.02   | 0.01   | 0.01   | 0.04   | 0.04   | 0.02   | 0.05   | 0.07   | 0.08   | 0.05   |
| -2.28                       | -0.02  | -0.01  | -0.01  | 0.04   | -0.01  | 0.00   | 0.01   | 0.01   | 0.04   | 0.02   | 0.05   |
| -1.78                       | 0.06   | 0.01   | -0.02  | -0.04  | -0.05  | -0.07  | -0.09  | -0.11  | -0.13  | -0.11  | -0.14  |
| -1.28                       | -0.04  | -0.03  | 0.00   | -0.04  | -0.02  | -0.02  | -0.01  | -0.06  | -0.02  | -0.04  | -0.03  |
| -0.78                       | 0.04   | 0.02   | 0.06   | 0.03   | 0.05   | 0.07   | 0.08   | 0.07   | 0.06   | 0.07   | 0.04   |
| -0.28                       | -0.06  | -0.03  | -0.04  | -0.05  | -0.06  | -0.03  | -0.03  | -0.05  | -0.02  | -0.02  | -0.01  |
| 0.22                        | -0.02  | -0.01  | -0.04  | -0.05  | -0.05  | -0.05  | -0.07  | -0.04  | -0.11  | -0.06  | -0.06  |
| 0.32                        | 0.00   | 0.00   | 0.00   | -0.01  | 0.02   | -0.01  | 0.01   | 0.03   | 0.01   | 0.00   | 0.02   |
| 0.42                        | -0.04  | -0.01  | -0.02  | 0.02   | -0.02  | -0.01  | -0.02  | -0.02  | -0.02  | -0.04  | -0.04  |

|      |       |       |       |       |       |       |       |       |       |       |       |
|------|-------|-------|-------|-------|-------|-------|-------|-------|-------|-------|-------|
| 0.52 | -0.03 | -0.02 | -0.04 | -0.06 | -0.06 | -0.01 | 0.00  | -0.03 | -0.03 | -0.02 | 0.00  |
| 0.62 | -0.05 | -0.03 | -0.09 | -0.08 | -0.09 | -0.06 | -0.10 | -0.08 | -0.09 | -0.06 | -0.02 |
| 0.72 | -0.06 | -0.13 | -0.10 | -0.13 | -0.11 | -0.12 | -0.11 | -0.13 | -0.07 | -0.09 | -0.09 |
| 0.77 | -0.07 | -0.10 | -0.09 | -0.09 | -0.07 | -0.05 | -0.06 | -0.07 | -0.05 | -0.04 | -0.09 |
| 0.82 | -0.04 | 0.00  | 0.00  | 0.00  | -0.02 | -0.04 | -0.06 | -0.01 | -0.01 | 0.00  | -0.02 |
| 0.87 | 0.07  | 0.06  | 0.02  | -0.02 | 0.00  | 0.02  | 0.02  | 0.04  | 0.05  | 0.02  | 0.02  |
| 0.92 | -0.09 | -0.08 | -0.11 | -0.13 | -0.09 | -0.07 | -0.05 | -0.06 | -0.08 | -0.07 | -0.05 |
| 0.97 | 0.04  | 0.04  | 0.04  | 0.02  | 0.06  | 0.06  | 0.02  | -0.03 | 0.02  | 0.03  | 0.05  |
| 1.02 | 0.00  | 0.03  | 0.00  | 0.01  | 0.03  | 0.03  | 0.03  | 0.06  | 0.02  | 0.04  | 0.02  |
| 1.07 | 0.00  | -0.02 | -0.04 | -0.04 | -0.08 | -0.06 | -0.03 | -0.03 | -0.04 | -0.05 | -0.05 |
| 1.12 | 0.02  | 0.03  | -0.01 | 0.03  | 0.01  | 0.05  | 0.06  | 0.04  | 0.08  | 0.04  | 0.08  |
| 1.17 | 0.01  | 0.01  | 0.03  | -0.03 | 0.01  | 0.02  | 0.02  | 0.04  | 0.05  | 0.08  | 0.11  |
| 1.22 | -0.11 | -0.07 | -0.05 | -0.04 | -0.07 | -0.07 | -0.10 | -0.07 | -0.09 | -0.02 | -0.03 |
| 1.27 | 0.05  | 0.02  | 0.04  | 0.01  | 0.02  | 0.03  | -0.01 | 0.04  | -0.02 | -0.05 | -0.03 |
| 1.32 | 0.02  | 0.01  | 0.05  | 0.03  | 0.02  | -0.01 | 0.00  | 0.05  | -0.02 | 0.00  | 0.01  |
| 1.37 | -0.05 | -0.02 | -0.05 | -0.02 | -0.04 | -0.03 | -0.03 | 0.04  | 0.02  | 0.04  | 0.07  |
| 1.42 | -0.03 | -0.03 | -0.02 | -0.04 | -0.03 | -0.03 | -0.02 | 0.02  | 0.03  | 0.04  | -0.04 |
| 1.47 | -0.05 | -0.05 | -0.04 | -0.04 | -0.05 | -0.06 | -0.05 | -0.05 | -0.03 | 0.00  | -0.02 |
| 1.52 | -0.08 | -0.06 | -0.05 | -0.05 | -0.11 | -0.09 | -0.01 | -0.01 | 0.02  | 0.00  | 0.02  |
| 1.57 | 0.44  | 0.45  | 0.34  | 0.26  | 0.18  | 0.12  | 0.10  | 0.09  | 0.03  | 0.04  | 0.03  |
| 1.62 | 3.46  | 3.34  | 3.19  | 3.03  | 2.85  | 2.69  | 2.54  | 2.37  | 2.25  | 2.11  | 2.01  |
| 1.67 | 8.38  | 8.33  | 8.28  | 8.16  | 8.07  | 7.98  | 7.85  | 7.81  | 7.68  | 7.57  | 7.44  |
| 1.72 | 9.42  | 9.47  | 9.50  | 9.50  | 9.52  | 9.52  | 9.56  | 9.56  | 9.56  | 9.53  | 9.56  |
| 1.77 | 8.28  | 8.36  | 8.40  | 8.45  | 8.51  | 8.58  | 8.63  | 8.75  | 8.76  | 8.80  | 8.94  |
| 1.82 | 7.07  | 7.11  | 7.16  | 7.20  | 7.26  | 7.30  | 7.41  | 7.50  | 7.53  | 7.61  | 7.65  |
| 1.87 | 6.23  | 6.24  | 6.29  | 6.32  | 6.41  | 6.48  | 6.51  | 6.58  | 6.71  | 6.72  | 6.79  |
| 1.92 | 5.91  | 5.95  | 5.92  | 6.00  | 6.03  | 6.08  | 6.13  | 6.23  | 6.26  | 6.34  | 6.44  |
| 1.97 | 5.78  | 5.82  | 5.85  | 5.84  | 5.89  | 5.93  | 6.01  | 6.08  | 6.16  | 6.23  | 6.29  |
| 2.02 | 5.64  | 5.64  | 5.65  | 5.67  | 5.70  | 5.71  | 5.73  | 5.83  | 5.91  | 5.96  | 6.03  |
| 2.07 | 5.57  | 5.58  | 5.61  | 5.61  | 5.64  | 5.66  | 5.74  | 5.79  | 5.87  | 5.92  | 6.03  |
| 2.12 | 5.62  | 5.60  | 5.61  | 5.63  | 5.66  | 5.68  | 5.67  | 5.76  | 5.78  | 5.88  | 5.96  |
| 2.17 | 5.28  | 5.26  | 5.19  | 5.19  | 5.22  | 5.22  | 5.23  | 5.31  | 5.33  | 5.38  | 5.41  |
| 2.22 | 5.14  | 5.16  | 5.16  | 5.09  | 5.09  | 5.14  | 5.15  | 5.19  | 5.23  | 5.30  | 5.36  |
| 2.27 | 5.11  | 5.06  | 5.01  | 5.02  | 5.03  | 5.04  | 5.05  | 5.12  | 5.17  | 5.14  | 5.22  |
| 2.32 | 4.92  | 4.91  | 4.88  | 4.85  | 4.82  | 4.90  | 4.90  | 4.97  | 4.99  | 5.08  | 5.09  |
| 2.37 | 5.11  | 5.08  | 5.01  | 4.99  | 5.02  | 5.02  | 5.05  | 5.08  | 5.10  | 5.14  | 5.22  |
| 2.42 | 4.92  | 4.87  | 4.82  | 4.83  | 4.79  | 4.79  | 4.82  | 4.84  | 4.92  | 4.99  | 5.02  |
| 2.47 | 4.67  | 4.62  | 4.53  | 4.53  | 4.55  | 4.55  | 4.58  | 4.59  | 4.64  | 4.67  | 4.73  |
| 2.52 | 4.84  | 4.79  | 4.74  | 4.68  | 4.70  | 4.70  | 4.70  | 4.72  | 4.71  | 4.80  | 4.86  |
| 2.57 | 4.68  | 4.65  | 4.61  | 4.58  | 4.57  | 4.58  | 4.58  | 4.66  | 4.69  | 4.72  | 4.75  |
| 2.62 | 4.61  | 4.55  | 4.50  | 4.47  | 4.48  | 4.46  | 4.47  | 4.48  | 4.56  | 4.58  | 4.62  |
| 2.67 | 4.54  | 4.45  | 4.38  | 4.38  | 4.36  | 4.34  | 4.35  | 4.35  | 4.36  | 4.45  | 4.48  |
| 2.72 | 4.51  | 4.49  | 4.42  | 4.38  | 4.33  | 4.31  | 4.34  | 4.39  | 4.38  | 4.42  | 4.46  |
| 2.77 | 4.50  | 4.45  | 4.33  | 4.33  | 4.30  | 4.29  | 4.26  | 4.29  | 4.34  | 4.33  | 4.35  |
| 2.82 | 4.46  | 4.43  | 4.36  | 4.28  | 4.26  | 4.24  | 4.23  | 4.24  | 4.25  | 4.28  | 4.31  |
| 2.87 | 4.43  | 4.38  | 4.32  | 4.26  | 4.26  | 4.25  | 4.24  | 4.30  | 4.30  | 4.32  | 4.41  |
| 2.92 | 4.38  | 4.29  | 4.23  | 4.21  | 4.16  | 4.16  | 4.18  | 4.21  | 4.22  | 4.26  | 4.26  |
| 2.97 | 4.42  | 4.35  | 4.34  | 4.26  | 4.19  | 4.20  | 4.18  | 4.24  | 4.26  | 4.29  | 4.27  |
| 3.02 | 4.43  | 4.36  | 4.26  | 4.20  | 4.17  | 4.20  | 4.15  | 4.16  | 4.20  | 4.21  | 4.24  |
| 3.07 | 4.36  | 4.32  | 4.23  | 4.11  | 4.09  | 4.07  | 4.13  | 4.15  | 4.14  | 4.17  | 4.19  |

|       |      |      |      |      |      |      |      |      |      |      |      |
|-------|------|------|------|------|------|------|------|------|------|------|------|
| 3.12  | 4.44 | 4.33 | 4.25 | 4.22 | 4.16 | 4.13 | 4.14 | 4.14 | 4.17 | 4.17 | 4.25 |
| 3.17  | 4.40 | 4.36 | 4.26 | 4.21 | 4.14 | 4.12 | 4.12 | 4.14 | 4.14 | 4.15 | 4.16 |
| 3.22  | 4.31 | 4.19 | 4.11 | 4.09 | 4.02 | 4.00 | 3.97 | 4.01 | 4.00 | 4.06 | 4.08 |
| 3.27  | 4.20 | 4.10 | 3.98 | 3.93 | 3.91 | 3.85 | 3.89 | 3.91 | 3.89 | 3.90 | 3.93 |
| 3.32  | 4.32 | 4.26 | 4.13 | 4.06 | 4.02 | 4.00 | 3.98 | 3.97 | 3.99 | 4.03 | 4.07 |
| 3.37  | 4.19 | 4.09 | 4.03 | 3.95 | 3.93 | 3.89 | 3.89 | 3.90 | 3.88 | 3.91 | 3.97 |
| 3.42  | 4.22 | 4.10 | 4.01 | 3.96 | 3.91 | 3.92 | 3.85 | 3.86 | 3.90 | 3.89 | 3.94 |
| 3.47  | 4.24 | 4.12 | 4.07 | 3.98 | 3.99 | 3.94 | 3.93 | 3.96 | 3.92 | 3.94 | 4.03 |
| 3.52  | 4.05 | 3.99 | 3.93 | 3.85 | 3.82 | 3.77 | 3.77 | 3.81 | 3.78 | 3.82 | 3.84 |
| 3.57  | 4.00 | 3.89 | 3.82 | 3.77 | 3.75 | 3.70 | 3.67 | 3.73 | 3.71 | 3.79 | 3.80 |
| 3.62  | 3.94 | 3.87 | 3.81 | 3.72 | 3.65 | 3.64 | 3.65 | 3.61 | 3.64 | 3.66 | 3.67 |
| 3.67  | 3.98 | 3.89 | 3.77 | 3.76 | 3.68 | 3.71 | 3.64 | 3.65 | 3.65 | 3.73 | 3.72 |
| 3.72  | 3.95 | 3.87 | 3.73 | 3.70 | 3.65 | 3.67 | 3.60 | 3.62 | 3.62 | 3.66 | 3.68 |
| 3.92  | 4.07 | 3.96 | 3.88 | 3.81 | 3.74 | 3.76 | 3.73 | 3.69 | 3.71 | 3.70 | 3.72 |
| 4.12  | 3.90 | 3.79 | 3.73 | 3.62 | 3.58 | 3.51 | 3.44 | 3.46 | 3.46 | 3.48 | 3.47 |
| 4.32  | 3.66 | 3.59 | 3.50 | 3.41 | 3.37 | 3.32 | 3.27 | 3.28 | 3.30 | 3.32 | 3.35 |
| 4.52  | 3.67 | 3.56 | 3.50 | 3.41 | 3.34 | 3.38 | 3.27 | 3.29 | 3.27 | 3.30 | 3.29 |
| 4.72  | 3.70 | 3.55 | 3.47 | 3.40 | 3.35 | 3.34 | 3.29 | 3.28 | 3.25 | 3.29 | 3.34 |
| 4.92  | 3.73 | 3.65 | 3.50 | 3.45 | 3.37 | 3.34 | 3.32 | 3.31 | 3.30 | 3.32 | 3.37 |
| 5.12  | 3.51 | 3.43 | 3.31 | 3.21 | 3.18 | 3.13 | 3.09 | 3.05 | 3.05 | 3.08 | 3.09 |
| 5.32  | 3.61 | 3.46 | 3.39 | 3.26 | 3.20 | 3.16 | 3.11 | 3.10 | 3.09 | 3.10 | 3.06 |
| 5.52  | 3.49 | 3.35 | 3.26 | 3.20 | 3.09 | 3.06 | 3.05 | 3.04 | 3.01 | 3.03 | 2.98 |
| 5.72  | 3.45 | 3.29 | 3.22 | 3.12 | 3.06 | 3.00 | 2.99 | 3.01 | 2.97 | 2.99 | 3.03 |
| 5.92  | 3.42 | 3.29 | 3.23 | 3.15 | 3.10 | 3.03 | 3.01 | 3.02 | 3.02 | 3.04 | 3.05 |
| 6.12  | 3.46 | 3.36 | 3.23 | 3.14 | 3.10 | 3.04 | 3.00 | 3.03 | 2.96 | 3.02 | 3.03 |
| 6.32  | 3.33 | 3.27 | 3.21 | 3.10 | 3.03 | 2.96 | 2.92 | 2.96 | 2.90 | 2.98 | 2.96 |
| 6.52  | 3.22 | 3.14 | 3.03 | 2.93 | 2.90 | 2.85 | 2.78 | 2.77 | 2.80 | 2.79 | 2.78 |
| 6.72  | 3.37 | 3.26 | 3.13 | 3.04 | 2.97 | 2.93 | 2.92 | 2.90 | 2.83 | 2.86 | 2.85 |
| 6.92  | 3.27 | 3.20 | 3.06 | 2.98 | 2.96 | 2.89 | 2.83 | 2.85 | 2.81 | 2.88 | 2.85 |
| 7.12  | 3.19 | 3.14 | 3.03 | 2.93 | 2.92 | 2.84 | 2.76 | 2.79 | 2.76 | 2.77 | 2.81 |
| 7.32  | 3.27 | 3.18 | 3.08 | 2.97 | 2.94 | 2.91 | 2.87 | 2.85 | 2.84 | 2.84 | 2.89 |
| 7.52  | 3.20 | 3.05 | 2.98 | 2.90 | 2.86 | 2.80 | 2.75 | 2.77 | 2.76 | 2.70 | 2.74 |
| 7.72  | 3.19 | 3.09 | 2.99 | 2.90 | 2.85 | 2.86 | 2.75 | 2.76 | 2.74 | 2.77 | 2.78 |
| 7.92  | 3.03 | 2.94 | 2.87 | 2.78 | 2.72 | 2.68 | 2.68 | 2.69 | 2.67 | 2.67 | 2.74 |
| 8.12  | 3.11 | 3.02 | 2.89 | 2.77 | 2.70 | 2.66 | 2.66 | 2.62 | 2.62 | 2.62 | 2.69 |
| 8.32  | 3.04 | 2.93 | 2.82 | 2.71 | 2.68 | 2.63 | 2.57 | 2.59 | 2.58 | 2.62 | 2.62 |
| 8.52  | 3.06 | 2.95 | 2.86 | 2.75 | 2.76 | 2.71 | 2.66 | 2.68 | 2.67 | 2.67 | 2.70 |
| 8.72  | 3.25 | 3.14 | 3.05 | 3.02 | 2.91 | 2.87 | 2.85 | 2.82 | 2.84 | 2.81 | 2.81 |
| 8.92  | 3.08 | 3.01 | 2.91 | 2.78 | 2.75 | 2.72 | 2.74 | 2.73 | 2.74 | 2.73 | 2.75 |
| 9.12  | 3.07 | 2.96 | 2.85 | 2.73 | 2.72 | 2.68 | 2.65 | 2.61 | 2.62 | 2.65 | 2.64 |
| 9.32  | 2.89 | 2.77 | 2.70 | 2.65 | 2.59 | 2.57 | 2.52 | 2.56 | 2.53 | 2.53 | 2.55 |
| 9.52  | 3.03 | 2.97 | 2.86 | 2.78 | 2.68 | 2.68 | 2.62 | 2.64 | 2.65 | 2.63 | 2.64 |
| 9.72  | 2.93 | 2.88 | 2.76 | 2.66 | 2.62 | 2.57 | 2.54 | 2.54 | 2.57 | 2.56 | 2.56 |
| 9.92  | 2.90 | 2.79 | 2.68 | 2.60 | 2.52 | 2.49 | 2.42 | 2.43 | 2.38 | 2.45 | 2.45 |
| 10.12 | 3.00 | 2.93 | 2.80 | 2.74 | 2.66 | 2.61 | 2.60 | 2.59 | 2.56 | 2.55 | 2.54 |
| 10.32 | 2.77 | 2.70 | 2.57 | 2.55 | 2.46 | 2.44 | 2.43 | 2.39 | 2.41 | 2.41 | 2.44 |
| 10.52 | 2.98 | 2.86 | 2.76 | 2.69 | 2.61 | 2.59 | 2.54 | 2.59 | 2.58 | 2.59 | 2.58 |
| 10.72 | 2.89 | 2.78 | 2.69 | 2.56 | 2.52 | 2.49 | 2.49 | 2.48 | 2.48 | 2.47 | 2.50 |
| 10.92 | 2.91 | 2.76 | 2.67 | 2.56 | 2.52 | 2.47 | 2.45 | 2.48 | 2.44 | 2.46 | 2.44 |
| 11.12 | 2.87 | 2.72 | 2.64 | 2.60 | 2.55 | 2.47 | 2.47 | 2.43 | 2.47 | 2.46 | 2.46 |

|       |      |      |      |      |      |      |      |      |      |      |      |
|-------|------|------|------|------|------|------|------|------|------|------|------|
| 11.32 | 2.82 | 2.74 | 2.58 | 2.51 | 2.46 | 2.43 | 2.36 | 2.37 | 2.37 | 2.40 | 2.40 |
| 11.52 | 2.80 | 2.68 | 2.63 | 2.53 | 2.47 | 2.46 | 2.44 | 2.45 | 2.41 | 2.43 | 2.48 |
| 11.72 | 2.79 | 2.64 | 2.56 | 2.48 | 2.44 | 2.37 | 2.36 | 2.34 | 2.38 | 2.37 | 2.38 |
| 11.92 | 2.83 | 2.73 | 2.63 | 2.61 | 2.51 | 2.53 | 2.46 | 2.50 | 2.48 | 2.50 | 2.48 |
| 12.12 | 2.96 | 2.85 | 2.71 | 2.61 | 2.64 | 2.60 | 2.54 | 2.53 | 2.52 | 2.56 | 2.49 |
| 12.32 | 2.81 | 2.72 | 2.60 | 2.52 | 2.45 | 2.43 | 2.40 | 2.42 | 2.44 | 2.44 | 2.43 |
| 12.52 | 2.67 | 2.56 | 2.50 | 2.40 | 2.42 | 2.37 | 2.34 | 2.36 | 2.34 | 2.39 | 2.44 |
| 12.72 | 2.62 | 2.52 | 2.42 | 2.36 | 2.35 | 2.27 | 2.26 | 2.20 | 2.24 | 2.24 | 2.28 |
| 12.92 | 2.77 | 2.67 | 2.58 | 2.48 | 2.44 | 2.39 | 2.41 | 2.41 | 2.38 | 2.39 | 2.39 |
| 13.12 | 2.70 | 2.62 | 2.53 | 2.46 | 2.46 | 2.43 | 2.37 | 2.32 | 2.35 | 2.42 | 2.42 |
| 13.32 | 2.91 | 2.82 | 2.73 | 2.66 | 2.59 | 2.58 | 2.53 | 2.54 | 2.51 | 2.55 | 2.57 |
| 13.52 | 2.64 | 2.53 | 2.46 | 2.40 | 2.34 | 2.34 | 2.27 | 2.30 | 2.29 | 2.29 | 2.34 |
| 13.72 | 2.65 | 2.49 | 2.44 | 2.34 | 2.30 | 2.25 | 2.23 | 2.26 | 2.21 | 2.23 | 2.25 |
| 13.92 | 2.70 | 2.54 | 2.45 | 2.40 | 2.38 | 2.33 | 2.34 | 2.34 | 2.33 | 2.35 | 2.40 |
| 14.00 | 2.77 | 2.65 | 2.52 | 2.44 | 2.36 | 2.35 | 2.26 | 2.31 | 2.37 | 2.35 | 2.35 |
| 14.08 | 2.78 | 2.64 | 2.55 | 2.51 | 2.46 | 2.39 | 2.37 | 2.34 | 2.34 | 2.40 | 2.35 |
| 14.17 | 2.69 | 2.58 | 2.49 | 2.42 | 2.39 | 2.38 | 2.33 | 2.31 | 2.34 | 2.38 | 2.34 |
| 14.27 | 2.69 | 2.59 | 2.49 | 2.41 | 2.39 | 2.39 | 2.33 | 2.35 | 2.35 | 2.37 | 2.39 |
| 14.38 | 2.65 | 2.53 | 2.48 | 2.37 | 2.32 | 2.30 | 2.28 | 2.25 | 2.24 | 2.26 | 2.27 |
| 14.49 | 2.57 | 2.46 | 2.36 | 2.29 | 2.26 | 2.22 | 2.20 | 2.20 | 2.22 | 2.25 | 2.26 |
| 14.61 | 2.66 | 2.63 | 2.51 | 2.42 | 2.37 | 2.40 | 2.36 | 2.37 | 2.35 | 2.38 | 2.42 |
| 14.75 | 2.68 | 2.61 | 2.54 | 2.43 | 2.38 | 2.39 | 2.32 | 2.37 | 2.35 | 2.36 | 2.36 |
| 14.89 | 2.72 | 2.57 | 2.48 | 2.40 | 2.35 | 2.30 | 2.21 | 2.23 | 2.26 | 2.23 | 2.24 |
| 15.05 | 2.55 | 2.45 | 2.39 | 2.31 | 2.23 | 2.23 | 2.21 | 2.22 | 2.23 | 2.23 | 2.26 |
| 15.21 | 2.58 | 2.47 | 2.35 | 2.31 | 2.23 | 2.18 | 2.20 | 2.17 | 2.19 | 2.23 | 2.22 |
| 15.39 | 2.51 | 2.44 | 2.35 | 2.24 | 2.22 | 2.18 | 2.22 | 2.18 | 2.16 | 2.16 | 2.19 |
| 15.59 | 2.70 | 2.61 | 2.55 | 2.45 | 2.40 | 2.31 | 2.32 | 2.35 | 2.30 | 2.31 | 2.38 |
| 15.80 | 2.70 | 2.65 | 2.49 | 2.39 | 2.37 | 2.34 | 2.32 | 2.35 | 2.29 | 2.30 | 2.35 |
| 16.02 | 2.56 | 2.45 | 2.38 | 2.27 | 2.19 | 2.19 | 2.19 | 2.21 | 2.21 | 2.19 | 2.21 |
| 16.27 | 2.66 | 2.55 | 2.41 | 2.40 | 2.33 | 2.26 | 2.24 | 2.31 | 2.29 | 2.26 | 2.28 |
| 16.53 | 2.62 | 2.50 | 2.38 | 2.35 | 2.34 | 2.31 | 2.24 | 2.25 | 2.30 | 2.30 | 2.35 |
| 16.81 | 2.57 | 2.53 | 2.42 | 2.32 | 2.30 | 2.30 | 2.25 | 2.26 | 2.31 | 2.34 | 2.33 |
| 17.12 | 2.62 | 2.52 | 2.44 | 2.37 | 2.30 | 2.26 | 2.24 | 2.25 | 2.23 | 2.24 | 2.25 |
| 17.45 | 2.59 | 2.51 | 2.43 | 2.31 | 2.32 | 2.28 | 2.26 | 2.26 | 2.27 | 2.28 | 2.31 |
| 17.81 | 2.71 | 2.64 | 2.47 | 2.39 | 2.38 | 2.35 | 2.30 | 2.34 | 2.29 | 2.33 | 2.32 |
| 18.19 | 2.56 | 2.46 | 2.38 | 2.30 | 2.27 | 2.23 | 2.24 | 2.25 | 2.22 | 2.23 | 2.24 |
| 18.60 | 2.62 | 2.51 | 2.42 | 2.33 | 2.30 | 2.28 | 2.25 | 2.22 | 2.21 | 2.24 | 2.23 |
| 19.05 | 2.57 | 2.49 | 2.40 | 2.35 | 2.30 | 2.25 | 2.21 | 2.23 | 2.23 | 2.28 | 2.28 |
| 19.53 | 2.59 | 2.51 | 2.43 | 2.32 | 2.31 | 2.29 | 2.27 | 2.24 | 2.27 | 2.25 | 2.29 |
| 20.05 | 2.53 | 2.45 | 2.38 | 2.28 | 2.26 | 2.23 | 2.19 | 2.26 | 2.23 | 2.23 | 2.26 |
| 20.61 | 2.48 | 2.32 | 2.29 | 2.18 | 2.14 | 2.12 | 2.08 | 2.07 | 2.10 | 2.11 | 2.10 |
| 21.22 | 2.44 | 2.33 | 2.22 | 2.17 | 2.16 | 2.14 | 2.07 | 2.11 | 2.15 | 2.12 | 2.15 |
| 21.87 | 2.52 | 2.35 | 2.29 | 2.21 | 2.17 | 2.16 | 2.14 | 2.17 | 2.09 | 2.16 | 2.17 |
| 22.57 | 2.43 | 2.33 | 2.26 | 2.12 | 2.11 | 2.11 | 2.03 | 2.06 | 2.07 | 2.08 | 2.11 |
| 23.33 | 2.56 | 2.44 | 2.32 | 2.25 | 2.22 | 2.24 | 2.15 | 2.16 | 2.14 | 2.19 | 2.17 |
| 24.15 | 2.34 | 2.27 | 2.20 | 2.11 | 2.10 | 2.02 | 2.02 | 1.98 | 2.00 | 2.06 | 2.05 |
| 25.03 | 2.44 | 2.35 | 2.22 | 2.18 | 2.18 | 2.12 | 2.08 | 2.07 | 2.07 | 2.09 | 2.12 |
| 25.98 | 2.53 | 2.41 | 2.30 | 2.24 | 2.17 | 2.15 | 2.13 | 2.14 | 2.11 | 2.11 | 2.13 |
| 27.01 | 2.41 | 2.31 | 2.17 | 2.14 | 2.12 | 2.08 | 2.07 | 2.08 | 2.06 | 2.05 | 2.06 |
| 28.11 | 2.39 | 2.32 | 2.19 | 2.16 | 2.10 | 2.07 | 2.04 | 2.06 | 2.04 | 2.07 | 2.13 |

|        |      |      |      |      |      |      |      |      |      |      |      |
|--------|------|------|------|------|------|------|------|------|------|------|------|
| 29.30  | 2.43 | 2.33 | 2.24 | 2.16 | 2.12 | 2.06 | 2.08 | 2.07 | 2.08 | 2.08 | 2.08 |
| 30.59  | 2.33 | 2.25 | 2.19 | 2.07 | 2.04 | 2.02 | 1.97 | 1.99 | 1.99 | 1.98 | 2.05 |
| 31.98  | 2.41 | 2.28 | 2.21 | 2.14 | 2.12 | 2.13 | 2.08 | 2.11 | 2.06 | 2.11 | 2.11 |
| 33.47  | 2.36 | 2.29 | 2.18 | 2.15 | 2.08 | 2.04 | 2.01 | 2.00 | 2.05 | 2.06 | 2.00 |
| 35.09  | 2.35 | 2.24 | 2.16 | 2.10 | 2.03 | 2.01 | 1.95 | 1.99 | 1.94 | 1.99 | 1.99 |
| 36.83  | 2.41 | 2.35 | 2.26 | 2.20 | 2.14 | 2.12 | 2.09 | 2.10 | 2.11 | 2.11 | 2.12 |
| 38.71  | 2.22 | 2.12 | 2.01 | 1.97 | 1.93 | 1.92 | 1.86 | 1.88 | 1.87 | 1.87 | 1.91 |
| 40.73  | 2.27 | 2.13 | 2.06 | 2.01 | 1.94 | 1.88 | 1.87 | 1.87 | 1.81 | 1.83 | 1.82 |
| 42.92  | 2.22 | 2.12 | 2.04 | 1.98 | 1.84 | 1.89 | 1.83 | 1.85 | 1.83 | 1.82 | 1.80 |
| 45.27  | 2.19 | 2.14 | 1.99 | 1.95 | 1.91 | 1.89 | 1.86 | 1.82 | 1.82 | 1.82 | 1.81 |
| 47.81  | 2.25 | 2.11 | 2.03 | 1.94 | 1.90 | 1.88 | 1.84 | 1.88 | 1.86 | 1.85 | 1.89 |
| 50.55  | 2.21 | 2.16 | 2.07 | 1.99 | 1.94 | 1.90 | 1.90 | 1.86 | 1.89 | 1.89 | 1.91 |
| 53.51  | 2.27 | 2.20 | 2.09 | 2.01 | 1.94 | 1.90 | 1.86 | 1.86 | 1.87 | 1.84 | 1.85 |
| 56.69  | 2.38 | 2.24 | 2.15 | 2.10 | 2.02 | 2.01 | 1.95 | 1.95 | 1.95 | 1.99 | 1.95 |
| 60.13  | 2.21 | 2.10 | 2.03 | 1.96 | 1.94 | 1.89 | 1.87 | 1.89 | 1.86 | 1.92 | 1.88 |
| 63.84  | 2.25 | 2.12 | 2.07 | 1.92 | 1.92 | 1.86 | 1.82 | 1.78 | 1.83 | 1.82 | 1.78 |
| 67.83  | 2.21 | 2.11 | 2.10 | 2.04 | 1.93 | 1.92 | 1.89 | 1.94 | 1.88 | 1.91 | 1.91 |
| 72.15  | 2.29 | 2.19 | 2.08 | 2.07 | 1.97 | 1.94 | 1.94 | 1.88 | 1.88 | 1.90 | 1.92 |
| 76.80  | 2.22 | 2.15 | 2.06 | 1.99 | 1.96 | 1.96 | 1.91 | 1.93 | 1.94 | 1.90 | 1.95 |
| 81.81  | 2.25 | 2.13 | 2.05 | 1.97 | 1.91 | 1.86 | 1.83 | 1.82 | 1.78 | 1.82 | 1.77 |
| 87.22  | 2.17 | 2.04 | 1.94 | 1.84 | 1.82 | 1.76 | 1.73 | 1.72 | 1.73 | 1.71 | 1.72 |
| 93.06  | 2.26 | 2.15 | 2.05 | 2.00 | 1.96 | 1.93 | 1.89 | 1.88 | 1.87 | 1.88 | 1.84 |
| 99.35  | 2.29 | 2.18 | 2.13 | 1.99 | 1.93 | 1.89 | 1.86 | 1.87 | 1.83 | 1.79 | 1.83 |
| 106.13 | 2.25 | 2.10 | 2.02 | 1.97 | 1.87 | 1.86 | 1.84 | 1.80 | 1.79 | 1.82 | 1.79 |
| 113.45 | 2.23 | 2.23 | 2.10 | 1.99 | 1.92 | 1.84 | 1.84 | 1.84 | 1.84 | 1.77 | 1.76 |
| 121.34 | 2.33 | 2.21 | 2.12 | 2.05 | 2.05 | 2.00 | 1.95 | 1.95 | 1.94 | 1.94 | 1.98 |
| 129.86 | 2.24 | 2.15 | 2.05 | 2.00 | 1.94 | 1.90 | 1.84 | 1.86 | 1.87 | 1.88 | 1.83 |
| 139.04 | 2.26 | 2.09 | 2.04 | 1.95 | 1.90 | 1.81 | 1.81 | 1.79 | 1.74 | 1.78 | 1.77 |
| 148.94 | 2.44 | 2.26 | 2.21 | 2.09 | 2.10 | 2.05 | 2.03 | 2.00 | 1.94 | 1.96 | 1.97 |
| 159.62 | 2.33 | 2.25 | 2.15 | 2.05 | 1.99 | 1.94 | 1.92 | 1.86 | 1.86 | 1.92 | 1.84 |
| 171.14 | 2.39 | 2.26 | 2.16 | 2.10 | 2.03 | 1.97 | 1.93 | 1.92 | 1.90 | 1.89 | 1.85 |
| 183.56 | 2.30 | 2.17 | 2.08 | 2.01 | 1.97 | 1.93 | 1.88 | 1.92 | 1.89 | 1.91 | 1.92 |
| 196.96 | 2.54 | 2.43 | 2.33 | 2.23 | 2.19 | 2.15 | 2.09 | 2.05 | 2.03 | 2.05 | 1.98 |
| 211.41 | 2.42 | 2.32 | 2.23 | 2.14 | 2.08 | 2.04 | 2.00 | 1.97 | 1.97 | 1.93 | 1.95 |
| 226.99 | 2.48 | 2.38 | 2.29 | 2.15 | 2.12 | 2.07 | 2.03 | 2.02 | 2.03 | 2.01 | 2.00 |
| 243.80 | 2.46 | 2.38 | 2.29 | 2.21 | 2.14 | 2.09 | 2.07 | 2.04 | 2.03 | 1.99 | 2.01 |
| 261.93 | 2.56 | 2.46 | 2.38 | 2.25 | 2.27 | 2.16 | 2.11 | 2.13 | 2.14 | 2.05 | 2.06 |
| 281.48 | 2.67 | 2.57 | 2.45 | 2.38 | 2.29 | 2.26 | 2.19 | 2.19 | 2.16 | 2.18 | 2.14 |
| 302.56 | 2.64 | 2.53 | 2.38 | 2.34 | 2.25 | 2.22 | 2.18 | 2.18 | 2.15 | 2.11 | 2.14 |
| 325.30 | 2.72 | 2.61 | 2.53 | 2.39 | 2.37 | 2.33 | 2.24 | 2.24 | 2.23 | 2.18 | 2.12 |
| 349.83 | 2.72 | 2.65 | 2.54 | 2.45 | 2.34 | 2.32 | 2.27 | 2.17 | 2.20 | 2.16 | 2.18 |
| 376.28 | 2.88 | 2.80 | 2.69 | 2.60 | 2.53 | 2.45 | 2.43 | 2.43 | 2.39 | 2.35 | 2.34 |
| 404.81 | 2.91 | 2.84 | 2.74 | 2.57 | 2.50 | 2.43 | 2.39 | 2.37 | 2.30 | 2.27 | 2.23 |
| 435.58 | 2.98 | 2.88 | 2.77 | 2.66 | 2.58 | 2.57 | 2.48 | 2.43 | 2.38 | 2.38 | 2.37 |
| 468.76 | 3.09 | 3.01 | 2.91 | 2.78 | 2.72 | 2.62 | 2.56 | 2.53 | 2.50 | 2.42 | 2.40 |
| 504.55 | 3.23 | 3.11 | 2.99 | 2.88 | 2.83 | 2.76 | 2.75 | 2.71 | 2.64 | 2.64 | 2.61 |
| 543.15 | 3.29 | 3.18 | 3.11 | 2.98 | 2.89 | 2.86 | 2.76 | 2.74 | 2.71 | 2.65 | 2.64 |
| 584.78 | 3.32 | 3.21 | 3.11 | 3.05 | 2.99 | 2.92 | 2.86 | 2.79 | 2.78 | 2.75 | 2.71 |
| 629.68 | 3.37 | 3.26 | 3.15 | 3.01 | 3.00 | 2.95 | 2.86 | 2.80 | 2.75 | 2.69 | 2.69 |
| 678.10 | 3.64 | 3.48 | 3.43 | 3.37 | 3.26 | 3.20 | 3.12 | 3.07 | 3.03 | 3.01 | 3.01 |

|         |      |      |      |      |      |      |      |      |      |      |      |
|---------|------|------|------|------|------|------|------|------|------|------|------|
| 730.33  | 3.77 | 3.65 | 3.56 | 3.43 | 3.40 | 3.32 | 3.27 | 3.19 | 3.15 | 3.07 | 3.03 |
| 786.65  | 3.91 | 3.80 | 3.72 | 3.59 | 3.48 | 3.45 | 3.36 | 3.32 | 3.27 | 3.22 | 3.17 |
| 847.40  | 4.10 | 4.01 | 3.85 | 3.77 | 3.65 | 3.64 | 3.54 | 3.51 | 3.45 | 3.38 | 3.32 |
| 912.92  | 4.22 | 4.14 | 3.97 | 3.88 | 3.82 | 3.76 | 3.64 | 3.60 | 3.55 | 3.49 | 3.46 |
| 983.58  | 4.38 | 4.30 | 4.18 | 4.04 | 3.98 | 3.92 | 3.85 | 3.80 | 3.70 | 3.69 | 3.65 |
| 1059.78 | 4.48 | 4.34 | 4.24 | 4.13 | 4.09 | 3.92 | 3.88 | 3.85 | 3.73 | 3.67 | 3.62 |
| 1141.98 | 4.55 | 4.46 | 4.36 | 4.26 | 4.20 | 4.07 | 4.02 | 3.98 | 3.91 | 3.88 | 3.77 |
| 1230.62 | 4.46 | 4.37 | 4.25 | 4.14 | 4.08 | 4.02 | 3.92 | 3.88 | 3.85 | 3.77 | 3.71 |
| 1326.23 | 4.79 | 4.70 | 4.58 | 4.45 | 4.37 | 4.25 | 4.21 | 4.11 | 4.06 | 4.00 | 3.92 |
| 1429.34 | 5.16 | 5.02 | 4.93 | 4.83 | 4.70 | 4.60 | 4.54 | 4.42 | 4.39 | 4.30 | 4.26 |
| 1540.54 | 5.08 | 4.93 | 4.82 | 4.76 | 4.65 | 4.58 | 4.48 | 4.36 | 4.35 | 4.27 | 4.17 |
| 1660.48 | 5.34 | 5.23 | 5.13 | 5.00 | 4.94 | 4.83 | 4.74 | 4.65 | 4.62 | 4.53 | 4.41 |
| 1789.83 | 5.47 | 5.36 | 5.23 | 5.11 | 5.05 | 4.94 | 4.85 | 4.77 | 4.69 | 4.64 | 4.59 |
| 1929.34 | 5.51 | 5.39 | 5.29 | 5.16 | 5.05 | 4.97 | 4.86 | 4.78 | 4.71 | 4.59 | 4.50 |
| 2079.80 | 5.61 | 5.42 | 5.35 | 5.20 | 5.12 | 5.04 | 4.94 | 4.85 | 4.78 | 4.72 | 4.62 |
| 2242.08 | 5.72 | 5.60 | 5.53 | 5.39 | 5.34 | 5.22 | 5.11 | 5.06 | 4.96 | 4.87 | 4.78 |
| 2417.10 | 5.88 | 5.79 | 5.66 | 5.54 | 5.41 | 5.37 | 5.23 | 5.19 | 5.06 | 4.99 | 4.87 |
| 2605.85 | 5.82 | 5.68 | 5.59 | 5.50 | 5.37 | 5.28 | 5.15 | 5.03 | 4.97 | 4.91 | 4.80 |
| 2809.43 | 5.71 | 5.64 | 5.54 | 5.40 | 5.33 | 5.19 | 5.18 | 5.05 | 4.94 | 4.85 | 4.79 |
| 3028.99 | 6.01 | 5.91 | 5.81 | 5.68 | 5.59 | 5.49 | 5.42 | 5.34 | 5.27 | 5.17 | 5.10 |
| 3265.79 | 6.02 | 5.87 | 5.79 | 5.67 | 5.62 | 5.50 | 5.41 | 5.30 | 5.19 | 5.14 | 5.06 |
| 3521.18 | 5.96 | 5.83 | 5.75 | 5.62 | 5.55 | 5.46 | 5.35 | 5.29 | 5.17 | 5.10 | 5.01 |
| 3796.62 | 6.01 | 5.90 | 5.79 | 5.69 | 5.63 | 5.51 | 5.42 | 5.37 | 5.26 | 5.14 | 5.04 |

| Wavelength<br>(nm)<br>Time<br>(ps) | 630.58 | 631.99 | 633.40 | 634.81 | 636.22 | 637.63 | 639.04 | 640.44 | 641.85 | 643.26 | 644.67 |
|------------------------------------|--------|--------|--------|--------|--------|--------|--------|--------|--------|--------|--------|
| -3.28                              | 0.12   | 0.12   | 0.11   | 0.11   | 0.17   | 0.17   | 0.10   | 0.10   | 0.05   | 0.06   | 0.12   |
| -2.78                              | 0.05   | 0.05   | 0.09   | 0.07   | 0.05   | 0.07   | 0.05   | 0.03   | 0.07   | 0.05   | 0.06   |
| -2.28                              | 0.04   | 0.02   | 0.02   | 0.00   | -0.01  | 0.04   | 0.04   | 0.06   | 0.04   | 0.07   | 0.04   |
| -1.78                              | -0.14  | -0.18  | -0.15  | -0.15  | -0.14  | -0.17  | -0.15  | -0.18  | -0.19  | -0.17  | -0.15  |
| -1.28                              | -0.05  | -0.04  | -0.07  | -0.02  | -0.02  | 0.03   | 0.01   | 0.00   | -0.03  | 0.02   | 0.00   |
| -0.78                              | 0.08   | 0.11   | 0.11   | 0.09   | 0.13   | 0.09   | 0.10   | 0.13   | 0.15   | 0.13   | 0.11   |
| -0.28                              | -0.02  | 0.00   | 0.00   | 0.03   | -0.02  | -0.03  | 0.00   | 0.00   | 0.01   | -0.05  | -0.02  |
| 0.22                               | -0.07  | -0.08  | -0.06  | -0.08  | -0.10  | -0.10  | -0.11  | -0.09  | -0.09  | -0.08  | -0.10  |
| 0.32                               | 0.04   | 0.04   | 0.03   | 0.01   | -0.03  | -0.01  | 0.05   | 0.00   | 0.02   | 0.01   | 0.00   |
| 0.42                               | -0.04  | -0.04  | -0.09  | -0.06  | -0.03  | -0.09  | -0.08  | -0.06  | -0.03  | -0.04  | -0.04  |
| 0.52                               | 0.01   | 0.04   | -0.03  | 0.02   | 0.01   | 0.05   | 0.03   | 0.05   | 0.07   | 0.07   | 0.04   |
| 0.62                               | -0.04  | -0.06  | -0.04  | -0.02  | 0.00   | -0.01  | -0.01  | 0.03   | 0.01   | 0.02   | -0.01  |
| 0.72                               | -0.11  | -0.12  | -0.15  | -0.11  | -0.09  | -0.14  | -0.15  | -0.16  | -0.14  | -0.11  | -0.15  |
| 0.77                               | -0.07  | -0.09  | -0.07  | -0.07  | -0.06  | 0.01   | -0.09  | -0.08  | -0.07  | -0.07  | -0.08  |
| 0.82                               | -0.05  | -0.04  | -0.05  | -0.04  | -0.05  | -0.06  | -0.05  | -0.11  | -0.12  | -0.05  | -0.06  |
| 0.87                               | 0.01   | 0.01   | 0.06   | 0.04   | 0.01   | -0.05  | -0.04  | -0.03  | -0.02  | -0.01  | -0.03  |
| 0.92                               | -0.03  | -0.07  | -0.01  | -0.04  | -0.07  | -0.06  | 0.01   | 0.02   | 0.04   | -0.02  | -0.01  |
| 0.97                               | 0.01   | 0.03   | -0.03  | 0.00   | 0.02   | -0.01  | 0.02   | 0.00   | -0.03  | -0.02  | -0.01  |
| 1.02                               | 0.08   | 0.07   | 0.10   | 0.07   | 0.08   | 0.05   | 0.03   | 0.10   | 0.07   | 0.09   | 0.10   |
| 1.07                               | -0.10  | -0.07  | -0.09  | -0.10  | -0.11  | -0.12  | -0.11  | -0.10  | -0.11  | -0.11  | -0.10  |
| 1.12                               | 0.06   | 0.12   | 0.12   | 0.09   | 0.11   | 0.12   | 0.12   | 0.17   | 0.14   | 0.13   | 0.06   |
| 1.17                               | 0.07   | 0.08   | 0.13   | 0.08   | 0.12   | 0.12   | 0.18   | 0.15   | 0.14   | 0.17   | 0.17   |
| 1.22                               | -0.04  | -0.07  | -0.04  | -0.03  | -0.05  | 0.00   | -0.02  | 0.01   | -0.01  | -0.03  | -0.02  |

|      |       |       |       |       |       |       |       |       |       |       |       |
|------|-------|-------|-------|-------|-------|-------|-------|-------|-------|-------|-------|
| 1.27 | -0.08 | -0.05 | -0.03 | -0.07 | -0.06 | -0.08 | -0.08 | -0.07 | -0.08 | -0.08 | -0.07 |
| 1.32 | -0.03 | -0.04 | 0.00  | 0.01  | -0.01 | -0.04 | -0.02 | 0.01  | 0.02  | 0.08  | 0.08  |
| 1.37 | 0.03  | 0.06  | 0.11  | 0.10  | 0.11  | 0.10  | 0.10  | 0.09  | 0.05  | 0.09  | 0.07  |
| 1.42 | 0.00  | 0.01  | 0.06  | 0.04  | 0.01  | 0.03  | 0.01  | 0.07  | 0.05  | 0.07  | 0.01  |
| 1.47 | -0.02 | 0.02  | 0.01  | 0.06  | 0.02  | 0.04  | 0.05  | 0.04  | 0.10  | 0.07  | 0.06  |
| 1.52 | 0.02  | 0.02  | 0.06  | 0.10  | 0.12  | 0.06  | 0.01  | 0.02  | 0.07  | 0.15  | 0.10  |
| 1.57 | -0.01 | -0.01 | -0.01 | -0.03 | 0.01  | -0.02 | -0.05 | -0.04 | -0.12 | -0.10 | -0.09 |
| 1.62 | 1.86  | 1.79  | 1.71  | 1.60  | 1.54  | 1.49  | 1.37  | 1.23  | 1.18  | 1.11  | 1.03  |
| 1.67 | 7.32  | 7.24  | 7.13  | 7.04  | 6.97  | 6.83  | 6.73  | 6.64  | 6.49  | 6.33  | 6.22  |
| 1.72 | 9.53  | 9.53  | 9.56  | 9.55  | 9.54  | 9.56  | 9.56  | 9.51  | 9.52  | 9.52  | 9.49  |
| 1.77 | 8.97  | 9.01  | 9.06  | 9.11  | 9.15  | 9.26  | 9.30  | 9.33  | 9.35  | 9.35  | 9.41  |
| 1.82 | 7.72  | 7.79  | 7.88  | 7.97  | 8.06  | 8.11  | 8.16  | 8.18  | 8.25  | 8.32  | 8.38  |
| 1.87 | 6.86  | 6.93  | 7.05  | 7.10  | 7.18  | 7.20  | 7.28  | 7.33  | 7.38  | 7.41  | 7.46  |
| 1.92 | 6.50  | 6.58  | 6.65  | 6.73  | 6.81  | 6.83  | 6.91  | 6.94  | 7.01  | 7.05  | 7.09  |
| 1.97 | 6.36  | 6.44  | 6.53  | 6.56  | 6.64  | 6.68  | 6.78  | 6.82  | 6.82  | 6.89  | 6.89  |
| 2.02 | 6.09  | 6.11  | 6.24  | 6.27  | 6.37  | 6.35  | 6.44  | 6.46  | 6.50  | 6.55  | 6.55  |
| 2.07 | 6.08  | 6.10  | 6.18  | 6.23  | 6.31  | 6.39  | 6.39  | 6.45  | 6.43  | 6.55  | 6.50  |
| 2.12 | 5.98  | 6.00  | 6.13  | 6.16  | 6.22  | 6.24  | 6.36  | 6.35  | 6.37  | 6.38  | 6.47  |
| 2.17 | 5.51  | 5.55  | 5.58  | 5.67  | 5.71  | 5.78  | 5.81  | 5.86  | 5.91  | 5.94  | 5.91  |
| 2.22 | 5.41  | 5.48  | 5.52  | 5.54  | 5.62  | 5.65  | 5.73  | 5.80  | 5.85  | 5.84  | 5.87  |
| 2.27 | 5.24  | 5.30  | 5.42  | 5.44  | 5.46  | 5.49  | 5.54  | 5.65  | 5.70  | 5.72  | 5.70  |
| 2.32 | 5.15  | 5.24  | 5.26  | 5.37  | 5.43  | 5.48  | 5.53  | 5.56  | 5.58  | 5.61  | 5.67  |
| 2.37 | 5.26  | 5.36  | 5.38  | 5.38  | 5.46  | 5.53  | 5.57  | 5.63  | 5.72  | 5.68  | 5.71  |
| 2.42 | 5.08  | 5.16  | 5.16  | 5.26  | 5.28  | 5.39  | 5.44  | 5.45  | 5.51  | 5.53  | 5.56  |
| 2.47 | 4.75  | 4.90  | 4.95  | 5.00  | 5.07  | 5.11  | 5.17  | 5.21  | 5.33  | 5.35  | 5.33  |
| 2.52 | 4.85  | 4.91  | 4.99  | 5.01  | 5.07  | 5.14  | 5.16  | 5.20  | 5.20  | 5.26  | 5.26  |
| 2.57 | 4.80  | 4.86  | 4.91  | 5.02  | 5.09  | 5.10  | 5.14  | 5.18  | 5.18  | 5.26  | 5.27  |
| 2.62 | 4.65  | 4.69  | 4.76  | 4.84  | 4.86  | 4.88  | 4.91  | 4.98  | 5.00  | 5.03  | 5.07  |
| 2.67 | 4.53  | 4.53  | 4.62  | 4.70  | 4.76  | 4.81  | 4.89  | 4.91  | 4.95  | 4.98  | 4.97  |
| 2.72 | 4.52  | 4.59  | 4.65  | 4.62  | 4.69  | 4.72  | 4.75  | 4.81  | 4.81  | 4.89  | 4.89  |
| 2.77 | 4.41  | 4.42  | 4.50  | 4.57  | 4.59  | 4.67  | 4.63  | 4.74  | 4.76  | 4.78  | 4.79  |
| 2.82 | 4.37  | 4.38  | 4.49  | 4.51  | 4.60  | 4.63  | 4.66  | 4.72  | 4.78  | 4.79  | 4.77  |
| 2.87 | 4.43  | 4.47  | 4.51  | 4.55  | 4.66  | 4.66  | 4.69  | 4.76  | 4.77  | 4.79  | 4.84  |
| 2.92 | 4.32  | 4.36  | 4.47  | 4.50  | 4.52  | 4.59  | 4.64  | 4.69  | 4.71  | 4.79  | 4.77  |
| 2.97 | 4.32  | 4.35  | 4.44  | 4.48  | 4.54  | 4.51  | 4.59  | 4.61  | 4.69  | 4.70  | 4.69  |
| 3.02 | 4.27  | 4.35  | 4.42  | 4.44  | 4.52  | 4.54  | 4.62  | 4.62  | 4.70  | 4.71  | 4.70  |
| 3.07 | 4.24  | 4.29  | 4.40  | 4.43  | 4.45  | 4.51  | 4.58  | 4.61  | 4.68  | 4.71  | 4.75  |
| 3.12 | 4.27  | 4.33  | 4.35  | 4.38  | 4.45  | 4.49  | 4.51  | 4.57  | 4.62  | 4.65  | 4.61  |
| 3.17 | 4.20  | 4.25  | 4.28  | 4.33  | 4.39  | 4.44  | 4.48  | 4.54  | 4.59  | 4.59  | 4.58  |
| 3.22 | 4.11  | 4.13  | 4.19  | 4.24  | 4.27  | 4.34  | 4.37  | 4.40  | 4.42  | 4.50  | 4.46  |
| 3.27 | 4.01  | 4.06  | 4.12  | 4.16  | 4.20  | 4.24  | 4.28  | 4.30  | 4.34  | 4.36  | 4.38  |
| 3.32 | 4.08  | 4.07  | 4.17  | 4.19  | 4.27  | 4.29  | 4.37  | 4.36  | 4.38  | 4.39  | 4.44  |
| 3.37 | 3.97  | 4.03  | 4.08  | 4.16  | 4.19  | 4.22  | 4.26  | 4.26  | 4.29  | 4.35  | 4.37  |
| 3.42 | 3.94  | 3.99  | 4.00  | 4.07  | 4.15  | 4.15  | 4.19  | 4.21  | 4.24  | 4.30  | 4.33  |
| 3.47 | 4.03  | 4.10  | 4.18  | 4.21  | 4.27  | 4.34  | 4.40  | 4.41  | 4.40  | 4.40  | 4.49  |
| 3.52 | 3.92  | 3.99  | 3.98  | 4.08  | 4.12  | 4.14  | 4.23  | 4.26  | 4.25  | 4.31  | 4.33  |
| 3.57 | 3.79  | 3.81  | 3.90  | 3.96  | 4.04  | 4.11  | 4.12  | 4.14  | 4.13  | 4.19  | 4.25  |
| 3.62 | 3.71  | 3.75  | 3.76  | 3.86  | 3.90  | 3.95  | 3.96  | 4.01  | 4.06  | 4.05  | 4.04  |
| 3.67 | 3.72  | 3.76  | 3.84  | 3.89  | 3.94  | 3.93  | 4.01  | 4.01  | 4.03  | 4.09  | 4.11  |
| 3.72 | 3.72  | 3.77  | 3.82  | 3.85  | 3.88  | 3.91  | 3.96  | 4.04  | 4.07  | 4.05  | 4.02  |



|       |      |      |      |      |      |      |      |      |      |      |      |
|-------|------|------|------|------|------|------|------|------|------|------|------|
| 3.92  | 3.73 | 3.77 | 3.81 | 3.87 | 3.93 | 3.94 | 3.97 | 4.02 | 4.06 | 4.10 | 4.05 |
| 4.12  | 3.53 | 3.55 | 3.62 | 3.65 | 3.71 | 3.70 | 3.80 | 3.80 | 3.82 | 3.88 | 3.94 |
| 4.32  | 3.41 | 3.41 | 3.45 | 3.44 | 3.50 | 3.56 | 3.63 | 3.62 | 3.68 | 3.66 | 3.69 |
| 4.52  | 3.34 | 3.35 | 3.43 | 3.41 | 3.48 | 3.54 | 3.59 | 3.57 | 3.60 | 3.57 | 3.60 |
| 4.72  | 3.37 | 3.37 | 3.43 | 3.44 | 3.48 | 3.55 | 3.59 | 3.65 | 3.62 | 3.63 | 3.67 |
| 4.92  | 3.34 | 3.38 | 3.41 | 3.42 | 3.52 | 3.50 | 3.50 | 3.54 | 3.57 | 3.60 | 3.59 |
| 5.12  | 3.05 | 3.10 | 3.17 | 3.18 | 3.23 | 3.23 | 3.25 | 3.25 | 3.34 | 3.39 | 3.37 |
| 5.32  | 3.09 | 3.11 | 3.12 | 3.20 | 3.20 | 3.20 | 3.22 | 3.28 | 3.33 | 3.40 | 3.36 |
| 5.52  | 2.99 | 3.05 | 3.10 | 3.11 | 3.08 | 3.16 | 3.15 | 3.14 | 3.20 | 3.18 | 3.20 |
| 5.72  | 3.02 | 3.04 | 3.08 | 3.17 | 3.16 | 3.20 | 3.22 | 3.22 | 3.27 | 3.32 | 3.27 |
| 5.92  | 3.06 | 3.11 | 3.12 | 3.16 | 3.23 | 3.23 | 3.25 | 3.29 | 3.33 | 3.33 | 3.38 |
| 6.12  | 3.04 | 3.08 | 3.06 | 3.10 | 3.18 | 3.20 | 3.23 | 3.22 | 3.27 | 3.27 | 3.25 |
| 6.32  | 2.95 | 3.00 | 3.08 | 3.06 | 3.11 | 3.13 | 3.16 | 3.21 | 3.20 | 3.26 | 3.26 |
| 6.52  | 2.80 | 2.85 | 2.94 | 2.96 | 2.94 | 3.01 | 3.03 | 3.04 | 3.07 | 3.13 | 3.14 |
| 6.72  | 2.85 | 2.87 | 2.92 | 2.95 | 2.96 | 3.01 | 3.05 | 3.04 | 3.04 | 3.08 | 3.06 |
| 6.92  | 2.90 | 2.90 | 2.95 | 2.95 | 2.95 | 2.98 | 3.01 | 3.03 | 3.07 | 3.08 | 3.06 |
| 7.12  | 2.80 | 2.83 | 2.89 | 2.92 | 2.95 | 2.96 | 2.99 | 3.01 | 3.00 | 3.06 | 3.06 |
| 7.32  | 2.89 | 2.91 | 2.93 | 2.97 | 3.03 | 3.04 | 3.04 | 3.02 | 3.06 | 3.06 | 3.06 |
| 7.52  | 2.76 | 2.79 | 2.87 | 2.90 | 2.90 | 2.89 | 2.92 | 3.01 | 3.02 | 3.05 | 3.00 |
| 7.72  | 2.82 | 2.78 | 2.85 | 2.85 | 2.92 | 2.95 | 3.00 | 3.06 | 3.02 | 3.04 | 3.05 |
| 7.92  | 2.73 | 2.75 | 2.75 | 2.83 | 2.86 | 2.92 | 2.92 | 2.88 | 2.91 | 2.97 | 2.97 |
| 8.12  | 2.68 | 2.69 | 2.71 | 2.71 | 2.76 | 2.80 | 2.81 | 2.81 | 2.86 | 2.84 | 2.90 |
| 8.32  | 2.63 | 2.65 | 2.67 | 2.73 | 2.78 | 2.80 | 2.77 | 2.81 | 2.81 | 2.85 | 2.86 |
| 8.52  | 2.69 | 2.71 | 2.73 | 2.81 | 2.82 | 2.83 | 2.85 | 2.85 | 2.88 | 2.89 | 2.93 |
| 8.72  | 2.88 | 2.86 | 2.95 | 2.92 | 2.92 | 3.00 | 3.00 | 3.03 | 3.00 | 2.96 | 3.04 |
| 8.92  | 2.78 | 2.78 | 2.89 | 2.87 | 2.90 | 2.88 | 2.98 | 2.99 | 2.96 | 3.01 | 3.01 |
| 9.12  | 2.67 | 2.69 | 2.70 | 2.75 | 2.79 | 2.82 | 2.84 | 2.85 | 2.86 | 2.89 | 2.88 |
| 9.32  | 2.60 | 2.63 | 2.62 | 2.66 | 2.72 | 2.73 | 2.74 | 2.74 | 2.78 | 2.81 | 2.79 |
| 9.52  | 2.68 | 2.70 | 2.75 | 2.75 | 2.79 | 2.78 | 2.80 | 2.84 | 2.84 | 2.83 | 2.83 |
| 9.72  | 2.59 | 2.59 | 2.66 | 2.64 | 2.70 | 2.67 | 2.66 | 2.71 | 2.72 | 2.71 | 2.69 |
| 9.92  | 2.42 | 2.44 | 2.52 | 2.49 | 2.54 | 2.54 | 2.52 | 2.56 | 2.60 | 2.62 | 2.55 |
| 10.12 | 2.57 | 2.65 | 2.67 | 2.69 | 2.76 | 2.78 | 2.77 | 2.80 | 2.86 | 2.83 | 2.86 |
| 10.32 | 2.45 | 2.52 | 2.51 | 2.55 | 2.58 | 2.56 | 2.58 | 2.65 | 2.64 | 2.68 | 2.64 |
| 10.52 | 2.61 | 2.64 | 2.70 | 2.72 | 2.71 | 2.81 | 2.81 | 2.80 | 2.80 | 2.81 | 2.81 |
| 10.72 | 2.48 | 2.54 | 2.57 | 2.56 | 2.59 | 2.65 | 2.67 | 2.69 | 2.66 | 2.69 | 2.59 |
| 10.92 | 2.49 | 2.45 | 2.48 | 2.55 | 2.55 | 2.56 | 2.57 | 2.61 | 2.58 | 2.57 | 2.60 |
| 11.12 | 2.45 | 2.49 | 2.48 | 2.55 | 2.61 | 2.58 | 2.59 | 2.59 | 2.62 | 2.60 | 2.64 |
| 11.32 | 2.42 | 2.45 | 2.45 | 2.47 | 2.52 | 2.53 | 2.57 | 2.60 | 2.58 | 2.62 | 2.61 |
| 11.52 | 2.46 | 2.51 | 2.51 | 2.52 | 2.51 | 2.53 | 2.63 | 2.55 | 2.61 | 2.62 | 2.57 |
| 11.72 | 2.39 | 2.42 | 2.47 | 2.52 | 2.52 | 2.54 | 2.57 | 2.54 | 2.58 | 2.59 | 2.59 |
| 11.92 | 2.53 | 2.54 | 2.58 | 2.63 | 2.60 | 2.62 | 2.65 | 2.62 | 2.67 | 2.73 | 2.67 |
| 12.12 | 2.54 | 2.59 | 2.63 | 2.64 | 2.68 | 2.66 | 2.72 | 2.74 | 2.73 | 2.72 | 2.72 |
| 12.32 | 2.42 | 2.49 | 2.52 | 2.54 | 2.56 | 2.59 | 2.61 | 2.65 | 2.68 | 2.70 | 2.69 |
| 12.52 | 2.41 | 2.46 | 2.51 | 2.52 | 2.56 | 2.58 | 2.61 | 2.60 | 2.65 | 2.64 | 2.64 |
| 12.72 | 2.29 | 2.31 | 2.35 | 2.31 | 2.38 | 2.42 | 2.42 | 2.38 | 2.40 | 2.37 | 2.40 |
| 12.92 | 2.39 | 2.44 | 2.45 | 2.45 | 2.52 | 2.50 | 2.56 | 2.54 | 2.56 | 2.54 | 2.53 |
| 13.12 | 2.36 | 2.42 | 2.46 | 2.46 | 2.56 | 2.52 | 2.53 | 2.53 | 2.50 | 2.54 | 2.55 |
| 13.32 | 2.58 | 2.55 | 2.58 | 2.62 | 2.63 | 2.64 | 2.66 | 2.65 | 2.63 | 2.61 | 2.62 |
| 13.52 | 2.28 | 2.31 | 2.36 | 2.36 | 2.43 | 2.37 | 2.36 | 2.39 | 2.43 | 2.42 | 2.46 |
| 13.72 | 2.25 | 2.27 | 2.32 | 2.31 | 2.36 | 2.38 | 2.40 | 2.40 | 2.39 | 2.47 | 2.48 |

|       |      |      |      |      |      |      |      |      |      |      |      |
|-------|------|------|------|------|------|------|------|------|------|------|------|
| 13.92 | 2.41 | 2.41 | 2.44 | 2.45 | 2.49 | 2.54 | 2.58 | 2.56 | 2.60 | 2.55 | 2.54 |
| 14.00 | 2.40 | 2.41 | 2.50 | 2.50 | 2.48 | 2.49 | 2.53 | 2.54 | 2.54 | 2.57 | 2.56 |
| 14.08 | 2.30 | 2.33 | 2.39 | 2.48 | 2.45 | 2.43 | 2.41 | 2.46 | 2.46 | 2.52 | 2.47 |
| 14.17 | 2.39 | 2.41 | 2.43 | 2.47 | 2.48 | 2.53 | 2.49 | 2.51 | 2.52 | 2.55 | 2.51 |
| 14.27 | 2.45 | 2.49 | 2.49 | 2.49 | 2.52 | 2.59 | 2.62 | 2.57 | 2.57 | 2.57 | 2.65 |
| 14.38 | 2.32 | 2.30 | 2.30 | 2.35 | 2.33 | 2.39 | 2.44 | 2.39 | 2.42 | 2.45 | 2.41 |
| 14.49 | 2.26 | 2.30 | 2.35 | 2.38 | 2.38 | 2.43 | 2.44 | 2.46 | 2.47 | 2.49 | 2.47 |
| 14.61 | 2.38 | 2.39 | 2.50 | 2.49 | 2.53 | 2.52 | 2.56 | 2.60 | 2.55 | 2.54 | 2.58 |
| 14.75 | 2.39 | 2.42 | 2.44 | 2.43 | 2.46 | 2.48 | 2.47 | 2.52 | 2.49 | 2.49 | 2.52 |
| 14.89 | 2.21 | 2.27 | 2.31 | 2.32 | 2.33 | 2.40 | 2.37 | 2.38 | 2.39 | 2.44 | 2.43 |
| 15.05 | 2.26 | 2.28 | 2.34 | 2.38 | 2.40 | 2.39 | 2.46 | 2.45 | 2.46 | 2.50 | 2.49 |
| 15.21 | 2.22 | 2.23 | 2.29 | 2.28 | 2.34 | 2.36 | 2.39 | 2.34 | 2.34 | 2.39 | 2.42 |
| 15.39 | 2.21 | 2.23 | 2.30 | 2.28 | 2.27 | 2.30 | 2.23 | 2.29 | 2.29 | 2.28 | 2.29 |
| 15.59 | 2.38 | 2.43 | 2.42 | 2.44 | 2.42 | 2.49 | 2.50 | 2.52 | 2.50 | 2.46 | 2.48 |
| 15.80 | 2.38 | 2.37 | 2.43 | 2.44 | 2.39 | 2.44 | 2.48 | 2.49 | 2.46 | 2.44 | 2.46 |
| 16.02 | 2.23 | 2.23 | 2.34 | 2.28 | 2.33 | 2.33 | 2.31 | 2.39 | 2.42 | 2.41 | 2.36 |
| 16.27 | 2.32 | 2.33 | 2.39 | 2.39 | 2.41 | 2.39 | 2.39 | 2.42 | 2.42 | 2.39 | 2.43 |
| 16.53 | 2.31 | 2.27 | 2.37 | 2.46 | 2.45 | 2.48 | 2.40 | 2.47 | 2.46 | 2.51 | 2.54 |
| 16.81 | 2.35 | 2.35 | 2.43 | 2.43 | 2.44 | 2.44 | 2.49 | 2.53 | 2.49 | 2.48 | 2.54 |
| 17.12 | 2.28 | 2.33 | 2.37 | 2.40 | 2.38 | 2.36 | 2.35 | 2.37 | 2.37 | 2.45 | 2.39 |
| 17.45 | 2.31 | 2.38 | 2.36 | 2.43 | 2.38 | 2.44 | 2.40 | 2.44 | 2.46 | 2.44 | 2.41 |
| 17.81 | 2.26 | 2.31 | 2.40 | 2.39 | 2.41 | 2.37 | 2.37 | 2.36 | 2.40 | 2.44 | 2.43 |
| 18.19 | 2.28 | 2.26 | 2.34 | 2.36 | 2.35 | 2.36 | 2.41 | 2.42 | 2.44 | 2.45 | 2.40 |
| 18.60 | 2.24 | 2.28 | 2.29 | 2.31 | 2.36 | 2.36 | 2.39 | 2.37 | 2.32 | 2.35 | 2.35 |
| 19.05 | 2.26 | 2.30 | 2.32 | 2.34 | 2.32 | 2.37 | 2.40 | 2.42 | 2.45 | 2.39 | 2.38 |
| 19.53 | 2.29 | 2.33 | 2.32 | 2.36 | 2.38 | 2.38 | 2.43 | 2.44 | 2.48 | 2.44 | 2.44 |
| 20.05 | 2.28 | 2.28 | 2.32 | 2.36 | 2.42 | 2.39 | 2.39 | 2.41 | 2.42 | 2.50 | 2.46 |
| 20.61 | 2.11 | 2.22 | 2.20 | 2.20 | 2.23 | 2.25 | 2.24 | 2.29 | 2.30 | 2.31 | 2.27 |
| 21.22 | 2.10 | 2.15 | 2.20 | 2.21 | 2.25 | 2.20 | 2.25 | 2.22 | 2.24 | 2.30 | 2.25 |
| 21.87 | 2.20 | 2.21 | 2.29 | 2.30 | 2.30 | 2.32 | 2.34 | 2.39 | 2.38 | 2.38 | 2.39 |
| 22.57 | 2.15 | 2.20 | 2.20 | 2.17 | 2.27 | 2.30 | 2.30 | 2.29 | 2.31 | 2.28 | 2.28 |
| 23.33 | 2.22 | 2.20 | 2.22 | 2.28 | 2.27 | 2.27 | 2.25 | 2.26 | 2.24 | 2.27 | 2.28 |
| 24.15 | 2.07 | 2.09 | 2.14 | 2.14 | 2.15 | 2.16 | 2.15 | 2.16 | 2.15 | 2.11 | 2.12 |
| 25.03 | 2.07 | 2.10 | 2.14 | 2.14 | 2.19 | 2.17 | 2.16 | 2.15 | 2.17 | 2.14 | 2.19 |
| 25.98 | 2.19 | 2.15 | 2.18 | 2.19 | 2.19 | 2.21 | 2.24 | 2.26 | 2.30 | 2.28 | 2.25 |
| 27.01 | 2.13 | 2.15 | 2.13 | 2.17 | 2.14 | 2.16 | 2.20 | 2.23 | 2.26 | 2.22 | 2.21 |
| 28.11 | 2.10 | 2.12 | 2.15 | 2.18 | 2.24 | 2.18 | 2.19 | 2.17 | 2.15 | 2.15 | 2.17 |
| 29.30 | 2.08 | 2.11 | 2.16 | 2.15 | 2.16 | 2.14 | 2.11 | 2.13 | 2.18 | 2.20 | 2.09 |
| 30.59 | 2.02 | 2.01 | 2.04 | 2.06 | 2.16 | 2.08 | 2.11 | 2.08 | 2.11 | 2.13 | 2.11 |
| 31.98 | 2.10 | 2.08 | 2.16 | 2.18 | 2.21 | 2.13 | 2.16 | 2.22 | 2.17 | 2.17 | 2.20 |
| 33.47 | 2.06 | 2.07 | 2.10 | 2.12 | 2.16 | 2.10 | 2.12 | 2.12 | 2.10 | 2.13 | 2.14 |
| 35.09 | 1.96 | 1.97 | 2.02 | 2.01 | 2.05 | 2.03 | 2.06 | 2.06 | 2.04 | 2.10 | 2.09 |
| 36.83 | 2.11 | 2.17 | 2.11 | 2.14 | 2.17 | 2.15 | 2.14 | 2.13 | 2.11 | 2.07 | 2.09 |
| 38.71 | 1.95 | 1.92 | 1.93 | 1.96 | 2.00 | 1.98 | 2.00 | 1.99 | 1.96 | 1.99 | 1.94 |
| 40.73 | 1.82 | 1.83 | 1.87 | 1.91 | 1.90 | 1.89 | 1.88 | 1.92 | 1.89 | 1.95 | 1.93 |
| 42.92 | 1.85 | 1.86 | 1.91 | 1.85 | 1.86 | 1.88 | 1.83 | 1.89 | 1.91 | 1.91 | 1.88 |
| 45.27 | 1.85 | 1.85 | 1.89 | 1.87 | 1.88 | 1.90 | 1.93 | 1.92 | 1.93 | 1.94 | 1.88 |
| 47.81 | 1.86 | 1.92 | 1.92 | 1.93 | 1.99 | 1.96 | 1.93 | 1.96 | 1.97 | 1.99 | 1.93 |
| 50.55 | 1.89 | 1.85 | 1.94 | 1.91 | 1.95 | 1.92 | 1.91 | 1.94 | 1.93 | 1.94 | 1.94 |
| 53.51 | 1.85 | 1.80 | 1.87 | 1.87 | 1.87 | 1.88 | 1.82 | 1.85 | 1.82 | 1.85 | 1.89 |

|         |      |      |      |      |      |      |      |      |      |      |      |
|---------|------|------|------|------|------|------|------|------|------|------|------|
| 56.69   | 1.90 | 1.96 | 1.95 | 2.00 | 1.98 | 1.97 | 1.92 | 1.91 | 1.88 | 1.88 | 1.93 |
| 60.13   | 1.92 | 1.93 | 1.97 | 1.96 | 1.95 | 1.95 | 1.98 | 1.97 | 1.96 | 1.96 | 1.95 |
| 63.84   | 1.83 | 1.82 | 1.84 | 1.86 | 1.83 | 1.85 | 1.84 | 1.86 | 1.89 | 1.84 | 1.83 |
| 67.83   | 1.88 | 1.90 | 1.92 | 1.97 | 2.00 | 1.92 | 1.89 | 1.92 | 1.90 | 1.96 | 1.90 |
| 72.15   | 1.87 | 1.85 | 1.91 | 1.93 | 1.92 | 1.96 | 1.93 | 1.91 | 1.94 | 1.93 | 1.90 |
| 76.80   | 1.91 | 1.94 | 2.01 | 1.93 | 1.92 | 1.94 | 1.93 | 1.87 | 1.89 | 1.89 | 1.89 |
| 81.81   | 1.77 | 1.83 | 1.89 | 1.87 | 1.84 | 1.85 | 1.82 | 1.82 | 1.85 | 1.83 | 1.75 |
| 87.22   | 1.70 | 1.72 | 1.77 | 1.77 | 1.75 | 1.77 | 1.76 | 1.73 | 1.73 | 1.73 | 1.76 |
| 93.06   | 1.88 | 1.86 | 1.87 | 1.87 | 1.89 | 1.86 | 1.87 | 1.84 | 1.81 | 1.79 | 1.79 |
| 99.35   | 1.82 | 1.84 | 1.85 | 1.83 | 1.82 | 1.89 | 1.82 | 1.82 | 1.84 | 1.82 | 1.81 |
| 106.13  | 1.76 | 1.82 | 1.80 | 1.80 | 1.79 | 1.83 | 1.80 | 1.80 | 1.80 | 1.80 | 1.79 |
| 113.45  | 1.80 | 1.80 | 1.81 | 1.82 | 1.83 | 1.81 | 1.78 | 1.78 | 1.78 | 1.77 | 1.74 |
| 121.34  | 1.91 | 1.94 | 1.96 | 2.00 | 1.91 | 1.87 | 1.95 | 1.92 | 1.91 | 1.88 | 1.83 |
| 129.86  | 1.82 | 1.86 | 1.84 | 1.86 | 1.84 | 1.86 | 1.85 | 1.82 | 1.81 | 1.77 | 1.77 |
| 139.04  | 1.73 | 1.75 | 1.75 | 1.75 | 1.78 | 1.81 | 1.76 | 1.76 | 1.73 | 1.73 | 1.79 |
| 148.94  | 1.98 | 1.97 | 1.94 | 1.95 | 1.95 | 1.95 | 1.94 | 1.91 | 1.88 | 1.87 | 1.82 |
| 159.62  | 1.85 | 1.80 | 1.82 | 1.86 | 1.82 | 1.79 | 1.76 | 1.77 | 1.73 | 1.73 | 1.74 |
| 171.14  | 1.88 | 1.85 | 1.85 | 1.84 | 1.81 | 1.80 | 1.80 | 1.78 | 1.81 | 1.78 | 1.81 |
| 183.56  | 1.86 | 1.91 | 1.92 | 1.85 | 1.87 | 1.92 | 1.90 | 1.86 | 1.85 | 1.85 | 1.81 |
| 196.96  | 1.98 | 1.96 | 1.96 | 1.94 | 1.92 | 1.91 | 1.88 | 1.87 | 1.89 | 1.86 | 1.77 |
| 211.41  | 1.90 | 1.91 | 1.89 | 1.90 | 1.87 | 1.87 | 1.85 | 1.87 | 1.81 | 1.79 | 1.79 |
| 226.99  | 1.99 | 2.03 | 1.95 | 1.94 | 1.97 | 1.96 | 1.94 | 1.94 | 1.89 | 1.88 | 1.80 |
| 243.80  | 1.97 | 1.99 | 1.97 | 1.97 | 1.99 | 1.95 | 1.92 | 1.95 | 1.89 | 1.86 | 1.84 |
| 261.93  | 2.00 | 2.03 | 2.04 | 2.06 | 1.99 | 1.99 | 1.94 | 1.96 | 1.91 | 1.91 | 1.87 |
| 281.48  | 2.15 | 2.10 | 2.12 | 2.12 | 2.12 | 2.10 | 2.09 | 2.06 | 2.07 | 2.07 | 2.03 |
| 302.56  | 2.12 | 2.11 | 2.12 | 2.11 | 2.10 | 2.04 | 2.01 | 2.00 | 1.94 | 1.99 | 1.92 |
| 325.30  | 2.10 | 2.10 | 2.14 | 2.06 | 2.09 | 2.07 | 2.01 | 1.99 | 1.95 | 1.92 | 1.90 |
| 349.83  | 2.14 | 2.13 | 2.11 | 2.09 | 2.03 | 2.07 | 2.01 | 1.99 | 2.00 | 1.98 | 1.92 |
| 376.28  | 2.28 | 2.24 | 2.27 | 2.23 | 2.24 | 2.20 | 2.16 | 2.18 | 2.10 | 2.14 | 2.14 |
| 404.81  | 2.23 | 2.20 | 2.16 | 2.16 | 2.13 | 2.03 | 2.02 | 2.01 | 1.97 | 1.95 | 1.89 |
| 435.58  | 2.35 | 2.29 | 2.27 | 2.27 | 2.27 | 2.27 | 2.21 | 2.22 | 2.15 | 2.16 | 2.14 |
| 468.76  | 2.39 | 2.43 | 2.36 | 2.32 | 2.26 | 2.27 | 2.23 | 2.23 | 2.18 | 2.18 | 2.10 |
| 504.55  | 2.55 | 2.54 | 2.53 | 2.48 | 2.49 | 2.44 | 2.39 | 2.38 | 2.34 | 2.30 | 2.26 |
| 543.15  | 2.58 | 2.57 | 2.53 | 2.49 | 2.48 | 2.40 | 2.34 | 2.30 | 2.33 | 2.28 | 2.27 |
| 584.78  | 2.66 | 2.61 | 2.59 | 2.60 | 2.49 | 2.48 | 2.47 | 2.47 | 2.41 | 2.38 | 2.27 |
| 629.68  | 2.64 | 2.62 | 2.56 | 2.53 | 2.48 | 2.47 | 2.47 | 2.37 | 2.31 | 2.29 | 2.26 |
| 678.10  | 2.93 | 2.87 | 2.90 | 2.84 | 2.80 | 2.79 | 2.75 | 2.75 | 2.70 | 2.61 | 2.63 |
| 730.33  | 2.98 | 2.97 | 2.93 | 2.89 | 2.82 | 2.74 | 2.73 | 2.64 | 2.62 | 2.56 | 2.51 |
| 786.65  | 3.13 | 3.07 | 3.03 | 2.98 | 2.96 | 2.92 | 2.83 | 2.74 | 2.67 | 2.63 | 2.56 |
| 847.40  | 3.30 | 3.23 | 3.21 | 3.07 | 3.09 | 3.03 | 2.98 | 2.94 | 2.84 | 2.81 | 2.74 |
| 912.92  | 3.41 | 3.34 | 3.27 | 3.26 | 3.18 | 3.09 | 3.06 | 3.02 | 2.97 | 2.93 | 2.85 |
| 983.58  | 3.55 | 3.50 | 3.42 | 3.37 | 3.36 | 3.31 | 3.24 | 3.18 | 3.22 | 3.12 | 3.01 |
| 1059.78 | 3.52 | 3.50 | 3.46 | 3.34 | 3.33 | 3.28 | 3.20 | 3.11 | 3.08 | 3.04 | 2.96 |
| 1141.98 | 3.71 | 3.63 | 3.60 | 3.55 | 3.47 | 3.45 | 3.38 | 3.31 | 3.23 | 3.17 | 3.15 |
| 1230.62 | 3.62 | 3.59 | 3.54 | 3.53 | 3.45 | 3.37 | 3.29 | 3.25 | 3.21 | 3.17 | 3.09 |
| 1326.23 | 3.87 | 3.81 | 3.77 | 3.64 | 3.59 | 3.55 | 3.54 | 3.48 | 3.43 | 3.33 | 3.22 |
| 1429.34 | 4.13 | 4.06 | 3.97 | 3.92 | 3.89 | 3.80 | 3.69 | 3.63 | 3.54 | 3.47 | 3.44 |
| 1540.54 | 4.14 | 4.05 | 3.96 | 3.91 | 3.86 | 3.81 | 3.76 | 3.63 | 3.55 | 3.48 | 3.45 |
| 1660.48 | 4.30 | 4.29 | 4.23 | 4.16 | 4.06 | 3.99 | 3.89 | 3.81 | 3.75 | 3.69 | 3.60 |
| 1789.83 | 4.45 | 4.41 | 4.30 | 4.27 | 4.17 | 4.13 | 4.02 | 3.94 | 3.84 | 3.85 | 3.74 |

|         |      |      |      |      |      |      |      |      |      |      |      |
|---------|------|------|------|------|------|------|------|------|------|------|------|
| 1929.34 | 4.43 | 4.36 | 4.32 | 4.22 | 4.15 | 4.07 | 4.00 | 3.93 | 3.84 | 3.73 | 3.64 |
| 2079.80 | 4.52 | 4.44 | 4.37 | 4.32 | 4.19 | 4.11 | 4.02 | 3.93 | 3.88 | 3.79 | 3.71 |
| 2242.08 | 4.70 | 4.59 | 4.58 | 4.48 | 4.37 | 4.31 | 4.20 | 4.11 | 4.02 | 4.01 | 3.92 |
| 2417.10 | 4.77 | 4.73 | 4.58 | 4.49 | 4.41 | 4.33 | 4.25 | 4.20 | 4.04 | 3.98 | 3.89 |
| 2605.85 | 4.68 | 4.63 | 4.56 | 4.50 | 4.41 | 4.29 | 4.26 | 4.17 | 4.09 | 4.03 | 3.89 |
| 2809.43 | 4.71 | 4.56 | 4.53 | 4.43 | 4.32 | 4.17 | 4.11 | 4.08 | 3.96 | 3.92 | 3.80 |
| 3028.99 | 4.96 | 4.88 | 4.81 | 4.73 | 4.67 | 4.60 | 4.46 | 4.34 | 4.26 | 4.22 | 4.14 |
| 3265.79 | 4.94 | 4.87 | 4.79 | 4.71 | 4.60 | 4.51 | 4.42 | 4.35 | 4.30 | 4.17 | 4.02 |
| 3521.18 | 4.92 | 4.79 | 4.71 | 4.62 | 4.57 | 4.48 | 4.38 | 4.31 | 4.25 | 4.16 | 4.08 |
| 3796.62 | 4.99 | 4.91 | 4.85 | 4.76 | 4.70 | 4.58 | 4.48 | 4.43 | 4.32 | 4.30 | 4.17 |

| Wavelength (nm) \ Time (ps) | 646.08 | 647.49 | 648.90 | 650.30 | 651.71 | 653.12 | 654.53 | 655.94 | 657.35 | 658.76 | 660.16 |
|-----------------------------|--------|--------|--------|--------|--------|--------|--------|--------|--------|--------|--------|
| -3.28                       | 0.07   | 0.08   | 0.06   | 0.09   | 0.08   | 0.02   | 0.05   | 0.03   | 0.04   | 0.03   | 0.04   |
| -2.78                       | 0.07   | 0.01   | 0.03   | 0.04   | 0.04   | 0.06   | 0.02   | 0.01   | 0.02   | 0.11   | 0.07   |
| -2.28                       | 0.09   | 0.04   | 0.07   | 0.04   | 0.01   | 0.00   | 0.03   | -0.01  | 0.03   | -0.03  | 0.00   |
| -1.78                       | -0.14  | -0.12  | -0.18  | -0.21  | -0.12  | -0.09  | -0.06  | -0.06  | -0.11  | -0.12  | -0.13  |
| -1.28                       | 0.03   | 0.02   | 0.00   | 0.00   | -0.01  | -0.02  | 0.03   | 0.00   | -0.04  | 0.00   | 0.01   |
| -0.78                       | 0.10   | 0.09   | 0.13   | 0.12   | 0.12   | 0.09   | 0.11   | 0.09   | 0.10   | 0.07   | 0.03   |
| -0.28                       | -0.01  | -0.04  | -0.01  | 0.02   | 0.01   | 0.01   | -0.04  | -0.03  | -0.02  | -0.01  | -0.05  |
| 0.22                        | -0.15  | -0.06  | -0.06  | -0.04  | -0.09  | -0.02  | -0.12  | -0.04  | 0.01   | -0.01  | -0.01  |
| 0.32                        | 0.01   | 0.01   | 0.01   | -0.01  | 0.04   | 0.03   | 0.00   | 0.02   | 0.04   | 0.02   | 0.06   |
| 0.42                        | -0.08  | -0.04  | -0.06  | -0.06  | -0.09  | -0.08  | -0.01  | -0.02  | -0.07  | -0.06  | -0.02  |
| 0.52                        | 0.04   | 0.00   | 0.08   | 0.07   | 0.10   | 0.03   | -0.01  | -0.01  | -0.02  | -0.05  | -0.01  |
| 0.62                        | 0.01   | 0.01   | -0.01  | -0.06  | -0.08  | -0.03  | -0.06  | -0.08  | 0.00   | -0.12  | -0.10  |
| 0.72                        | -0.21  | -0.21  | -0.16  | -0.16  | -0.13  | -0.17  | -0.20  | -0.16  | -0.12  | -0.10  | -0.03  |
| 0.77                        | -0.07  | -0.13  | -0.12  | -0.10  | -0.10  | -0.09  | -0.15  | -0.13  | -0.15  | -0.12  | -0.12  |
| 0.82                        | -0.09  | -0.12  | -0.07  | -0.03  | -0.08  | -0.12  | -0.05  | -0.09  | -0.04  | -0.04  | 0.00   |
| 0.87                        | -0.09  | -0.05  | -0.04  | -0.02  | -0.03  | -0.03  | -0.02  | 0.01   | 0.03   | 0.03   | 0.00   |
| 0.92                        | -0.01  | 0.02   | 0.00   | 0.01   | -0.02  | 0.01   | 0.04   | 0.04   | 0.07   | 0.07   | 0.06   |
| 0.97                        | -0.01  | 0.03   | -0.03  | 0.03   | -0.03  | 0.03   | 0.00   | 0.06   | 0.06   | -0.01  | -0.01  |
| 1.02                        | 0.08   | 0.09   | 0.08   | 0.10   | 0.11   | 0.11   | 0.11   | 0.09   | 0.14   | 0.12   | 0.06   |
| 1.07                        | -0.13  | -0.07  | -0.11  | -0.06  | -0.08  | -0.10  | -0.04  | -0.06  | -0.03  | -0.08  | -0.03  |
| 1.12                        | 0.11   | 0.10   | 0.15   | 0.15   | 0.11   | 0.14   | 0.11   | 0.12   | 0.10   | 0.11   | 0.06   |
| 1.17                        | 0.19   | 0.20   | 0.13   | 0.13   | 0.11   | 0.07   | 0.10   | 0.04   | 0.07   | -0.01  | 0.04   |
| 1.22                        | 0.04   | -0.04  | 0.02   | 0.00   | -0.03  | 0.03   | -0.03  | 0.02   | 0.09   | 0.02   | 0.01   |
| 1.27                        | -0.10  | -0.10  | -0.06  | -0.08  | -0.05  | -0.09  | -0.04  | -0.05  | -0.04  | 0.03   | -0.01  |
| 1.32                        | 0.03   | 0.00   | -0.01  | 0.05   | 0.05   | 0.06   | 0.03   | 0.03   | 0.02   | 0.01   | -0.01  |
| 1.37                        | 0.09   | 0.09   | 0.02   | 0.03   | 0.01   | -0.03  | -0.08  | -0.02  | -0.03  | -0.03  | -0.07  |
| 1.42                        | 0.05   | -0.03  | -0.01  | 0.03   | 0.03   | -0.01  | -0.06  | -0.03  | -0.01  | -0.01  | 0.04   |
| 1.47                        | 0.07   | 0.12   | 0.10   | 0.12   | 0.08   | 0.12   | 0.10   | 0.13   | 0.08   | 0.06   | 0.06   |
| 1.52                        | 0.06   | 0.02   | 0.02   | 0.09   | 0.10   | 0.05   | -0.01  | -0.01  | 0.02   | 0.02   | 0.04   |
| 1.57                        | -0.11  | -0.16  | -0.13  | -0.16  | -0.17  | -0.13  | -0.07  | -0.14  | -0.08  | -0.13  | -0.10  |
| 1.62                        | 0.91   | 0.85   | 0.69   | 0.68   | 0.67   | 0.55   | 0.50   | 0.44   | 0.46   | 0.43   | 0.40   |
| 1.67                        | 5.99   | 5.89   | 5.71   | 5.52   | 5.33   | 5.06   | 4.92   | 4.76   | 4.63   | 4.45   | 4.34   |
| 1.72                        | 9.39   | 9.31   | 9.24   | 9.19   | 9.04   | 8.97   | 8.79   | 8.63   | 8.56   | 8.36   | 8.20   |
| 1.77                        | 9.42   | 9.40   | 9.37   | 9.34   | 9.34   | 9.30   | 9.27   | 9.16   | 9.07   | 9.02   | 8.95   |
| 1.82                        | 8.40   | 8.34   | 8.40   | 8.42   | 8.46   | 8.45   | 8.44   | 8.39   | 8.42   | 8.39   | 8.43   |
| 1.87                        | 7.51   | 7.57   | 7.60   | 7.64   | 7.66   | 7.63   | 7.68   | 7.70   | 7.76   | 7.72   | 7.80   |

|      |      |      |      |      |      |      |      |      |      |      |      |
|------|------|------|------|------|------|------|------|------|------|------|------|
| 1.92 | 7.14 | 7.20 | 7.22 | 7.19 | 7.23 | 7.27 | 7.30 | 7.39 | 7.36 | 7.35 | 7.39 |
| 1.97 | 6.95 | 6.95 | 6.94 | 7.00 | 7.02 | 7.04 | 7.07 | 7.08 | 7.03 | 7.08 | 7.08 |
| 2.02 | 6.62 | 6.61 | 6.64 | 6.69 | 6.62 | 6.65 | 6.70 | 6.72 | 6.78 | 6.76 | 6.81 |
| 2.07 | 6.53 | 6.52 | 6.56 | 6.53 | 6.58 | 6.55 | 6.57 | 6.57 | 6.61 | 6.58 | 6.62 |
| 2.12 | 6.46 | 6.47 | 6.46 | 6.51 | 6.53 | 6.57 | 6.58 | 6.59 | 6.65 | 6.61 | 6.66 |
| 2.17 | 5.99 | 6.04 | 6.04 | 6.05 | 6.06 | 6.10 | 6.10 | 6.09 | 6.08 | 6.15 | 6.14 |
| 2.22 | 5.91 | 5.95 | 5.94 | 5.93 | 5.96 | 5.94 | 5.97 | 6.01 | 6.04 | 5.98 | 6.01 |
| 2.27 | 5.71 | 5.74 | 5.80 | 5.86 | 5.82 | 5.80 | 5.78 | 5.81 | 5.80 | 5.86 | 5.83 |
| 2.32 | 5.70 | 5.66 | 5.69 | 5.73 | 5.71 | 5.71 | 5.68 | 5.71 | 5.64 | 5.64 | 5.63 |
| 2.37 | 5.75 | 5.75 | 5.79 | 5.79 | 5.79 | 5.80 | 5.77 | 5.80 | 5.82 | 5.83 | 5.80 |
| 2.42 | 5.63 | 5.61 | 5.59 | 5.57 | 5.56 | 5.63 | 5.62 | 5.64 | 5.57 | 5.50 | 5.53 |
| 2.47 | 5.35 | 5.40 | 5.43 | 5.42 | 5.44 | 5.34 | 5.36 | 5.33 | 5.38 | 5.29 | 5.33 |
| 2.52 | 5.32 | 5.32 | 5.31 | 5.37 | 5.31 | 5.27 | 5.34 | 5.34 | 5.35 | 5.26 | 5.31 |
| 2.57 | 5.27 | 5.23 | 5.27 | 5.26 | 5.23 | 5.22 | 5.19 | 5.17 | 5.17 | 5.13 | 5.17 |
| 2.62 | 5.03 | 5.05 | 5.05 | 5.05 | 5.04 | 5.03 | 4.99 | 5.02 | 5.01 | 5.02 | 5.01 |
| 2.67 | 5.05 | 5.13 | 5.11 | 5.08 | 5.06 | 5.11 | 5.12 | 5.12 | 5.09 | 5.00 | 4.99 |
| 2.72 | 4.93 | 4.91 | 4.92 | 4.93 | 4.95 | 4.95 | 4.88 | 4.94 | 4.90 | 4.92 | 4.92 |
| 2.77 | 4.87 | 4.85 | 4.89 | 4.92 | 4.91 | 4.89 | 4.85 | 4.88 | 4.88 | 4.92 | 4.90 |
| 2.82 | 4.84 | 4.91 | 4.90 | 4.89 | 4.93 | 4.93 | 4.86 | 4.92 | 4.88 | 4.83 | 4.78 |
| 2.87 | 4.84 | 4.83 | 4.80 | 4.83 | 4.82 | 4.82 | 4.82 | 4.88 | 4.86 | 4.84 | 4.77 |
| 2.92 | 4.75 | 4.77 | 4.79 | 4.78 | 4.74 | 4.72 | 4.73 | 4.70 | 4.68 | 4.64 | 4.66 |
| 2.97 | 4.72 | 4.72 | 4.75 | 4.75 | 4.76 | 4.74 | 4.72 | 4.67 | 4.72 | 4.70 | 4.71 |
| 3.02 | 4.76 | 4.72 | 4.76 | 4.75 | 4.73 | 4.67 | 4.69 | 4.70 | 4.68 | 4.68 | 4.64 |
| 3.07 | 4.74 | 4.78 | 4.76 | 4.83 | 4.82 | 4.79 | 4.78 | 4.78 | 4.75 | 4.73 | 4.74 |
| 3.12 | 4.60 | 4.64 | 4.65 | 4.68 | 4.69 | 4.62 | 4.62 | 4.63 | 4.70 | 4.65 | 4.67 |
| 3.17 | 4.59 | 4.64 | 4.70 | 4.65 | 4.63 | 4.59 | 4.60 | 4.56 | 4.55 | 4.55 | 4.49 |
| 3.22 | 4.54 | 4.50 | 4.53 | 4.47 | 4.44 | 4.50 | 4.48 | 4.49 | 4.46 | 4.42 | 4.41 |
| 3.27 | 4.39 | 4.41 | 4.37 | 4.45 | 4.39 | 4.36 | 4.33 | 4.37 | 4.40 | 4.35 | 4.34 |
| 3.32 | 4.42 | 4.49 | 4.47 | 4.49 | 4.49 | 4.49 | 4.54 | 4.49 | 4.53 | 4.46 | 4.53 |
| 3.37 | 4.39 | 4.42 | 4.44 | 4.44 | 4.44 | 4.45 | 4.45 | 4.47 | 4.44 | 4.41 | 4.40 |
| 3.42 | 4.33 | 4.35 | 4.36 | 4.31 | 4.31 | 4.28 | 4.36 | 4.36 | 4.35 | 4.30 | 4.32 |
| 3.47 | 4.47 | 4.51 | 4.50 | 4.49 | 4.45 | 4.45 | 4.43 | 4.41 | 4.39 | 4.38 | 4.36 |
| 3.52 | 4.31 | 4.34 | 4.37 | 4.41 | 4.32 | 4.30 | 4.26 | 4.28 | 4.26 | 4.23 | 4.24 |
| 3.57 | 4.25 | 4.25 | 4.22 | 4.23 | 4.20 | 4.24 | 4.26 | 4.21 | 4.18 | 4.12 | 4.21 |
| 3.62 | 4.04 | 4.10 | 4.11 | 4.11 | 4.13 | 4.04 | 4.11 | 4.09 | 4.10 | 4.04 | 4.02 |
| 3.67 | 4.10 | 4.14 | 4.12 | 4.14 | 4.12 | 4.06 | 4.09 | 4.11 | 4.12 | 4.10 | 4.01 |
| 3.72 | 4.08 | 4.12 | 4.12 | 4.15 | 4.11 | 4.09 | 4.06 | 4.08 | 4.04 | 4.03 | 4.01 |
| 3.92 | 4.05 | 4.10 | 4.10 | 4.21 | 4.12 | 4.10 | 4.06 | 4.07 | 4.11 | 4.10 | 4.08 |
| 4.12 | 3.92 | 3.94 | 4.00 | 3.97 | 3.94 | 3.92 | 3.88 | 3.92 | 3.86 | 3.79 | 3.81 |
| 4.32 | 3.70 | 3.73 | 3.75 | 3.74 | 3.74 | 3.69 | 3.75 | 3.75 | 3.77 | 3.76 | 3.78 |
| 4.52 | 3.68 | 3.70 | 3.65 | 3.65 | 3.67 | 3.67 | 3.66 | 3.68 | 3.64 | 3.62 | 3.65 |
| 4.72 | 3.67 | 3.66 | 3.72 | 3.68 | 3.67 | 3.67 | 3.67 | 3.61 | 3.64 | 3.61 | 3.64 |
| 4.92 | 3.56 | 3.52 | 3.56 | 3.54 | 3.57 | 3.54 | 3.57 | 3.56 | 3.56 | 3.57 | 3.51 |
| 5.12 | 3.35 | 3.34 | 3.37 | 3.42 | 3.42 | 3.43 | 3.34 | 3.32 | 3.36 | 3.39 | 3.43 |
| 5.32 | 3.36 | 3.41 | 3.42 | 3.47 | 3.45 | 3.46 | 3.46 | 3.38 | 3.40 | 3.41 | 3.45 |
| 5.52 | 3.22 | 3.24 | 3.24 | 3.24 | 3.25 | 3.23 | 3.25 | 3.24 | 3.26 | 3.28 | 3.29 |
| 5.72 | 3.28 | 3.27 | 3.28 | 3.35 | 3.27 | 3.30 | 3.28 | 3.25 | 3.24 | 3.24 | 3.28 |
| 5.92 | 3.41 | 3.37 | 3.44 | 3.39 | 3.37 | 3.36 | 3.39 | 3.38 | 3.43 | 3.35 | 3.33 |
| 6.12 | 3.29 | 3.27 | 3.28 | 3.24 | 3.27 | 3.20 | 3.22 | 3.26 | 3.23 | 3.22 | 3.14 |
| 6.32 | 3.25 | 3.31 | 3.31 | 3.30 | 3.28 | 3.24 | 3.25 | 3.26 | 3.21 | 3.29 | 3.23 |

|       |      |      |      |      |      |      |      |      |      |      |      |
|-------|------|------|------|------|------|------|------|------|------|------|------|
| 6.52  | 3.11 | 3.09 | 3.12 | 3.15 | 3.13 | 3.10 | 3.09 | 3.08 | 3.10 | 3.03 | 3.05 |
| 6.72  | 3.08 | 3.09 | 3.09 | 3.08 | 3.09 | 3.09 | 3.11 | 3.08 | 3.12 | 3.10 | 3.08 |
| 6.92  | 3.00 | 3.01 | 3.08 | 3.04 | 3.04 | 2.98 | 2.97 | 2.94 | 3.02 | 3.04 | 2.99 |
| 7.12  | 3.07 | 3.09 | 3.08 | 3.06 | 3.07 | 3.10 | 3.16 | 3.11 | 3.11 | 3.07 | 3.10 |
| 7.32  | 3.04 | 3.04 | 3.03 | 2.99 | 3.05 | 2.97 | 2.98 | 2.97 | 2.96 | 2.97 | 2.97 |
| 7.52  | 3.02 | 2.99 | 3.03 | 3.08 | 3.05 | 3.00 | 2.93 | 2.94 | 2.97 | 3.00 | 3.00 |
| 7.72  | 3.06 | 3.09 | 3.14 | 3.13 | 3.10 | 3.03 | 3.08 | 3.13 | 3.14 | 3.06 | 3.09 |
| 7.92  | 2.92 | 2.95 | 2.94 | 2.95 | 2.92 | 2.91 | 2.94 | 2.88 | 2.86 | 2.85 | 2.85 |
| 8.12  | 2.84 | 2.85 | 2.88 | 2.85 | 2.81 | 2.81 | 2.77 | 2.80 | 2.83 | 2.81 | 2.83 |
| 8.32  | 2.91 | 2.85 | 2.88 | 2.81 | 2.89 | 2.89 | 2.85 | 2.82 | 2.82 | 2.79 | 2.83 |
| 8.52  | 2.94 | 2.86 | 2.87 | 2.88 | 2.91 | 2.89 | 2.88 | 2.80 | 2.85 | 2.80 | 2.86 |
| 8.72  | 3.00 | 3.03 | 3.03 | 3.01 | 2.98 | 2.97 | 2.92 | 2.99 | 2.97 | 2.96 | 2.99 |
| 8.92  | 3.03 | 3.03 | 3.08 | 3.09 | 3.04 | 3.00 | 3.00 | 3.02 | 3.08 | 3.00 | 2.99 |
| 9.12  | 2.92 | 2.91 | 2.89 | 2.84 | 2.78 | 2.79 | 2.88 | 2.83 | 2.81 | 2.78 | 2.80 |
| 9.32  | 2.81 | 2.77 | 2.72 | 2.76 | 2.79 | 2.76 | 2.74 | 2.75 | 2.71 | 2.75 | 2.80 |
| 9.52  | 2.87 | 2.89 | 2.92 | 2.90 | 2.91 | 2.90 | 2.85 | 2.88 | 2.89 | 2.86 | 2.88 |
| 9.72  | 2.66 | 2.71 | 2.66 | 2.68 | 2.64 | 2.70 | 2.70 | 2.71 | 2.71 | 2.69 | 2.71 |
| 9.92  | 2.56 | 2.57 | 2.58 | 2.63 | 2.59 | 2.52 | 2.50 | 2.49 | 2.51 | 2.50 | 2.52 |
| 10.12 | 2.88 | 2.91 | 2.91 | 2.88 | 2.84 | 2.89 | 2.86 | 2.91 | 2.83 | 2.84 | 2.84 |
| 10.32 | 2.64 | 2.66 | 2.69 | 2.69 | 2.69 | 2.66 | 2.59 | 2.60 | 2.61 | 2.61 | 2.59 |
| 10.52 | 2.82 | 2.79 | 2.75 | 2.77 | 2.76 | 2.74 | 2.70 | 2.67 | 2.68 | 2.71 | 2.71 |
| 10.72 | 2.61 | 2.67 | 2.71 | 2.69 | 2.70 | 2.63 | 2.65 | 2.70 | 2.71 | 2.71 | 2.77 |
| 10.92 | 2.60 | 2.66 | 2.63 | 2.59 | 2.58 | 2.59 | 2.60 | 2.57 | 2.63 | 2.63 | 2.59 |
| 11.12 | 2.62 | 2.63 | 2.62 | 2.67 | 2.68 | 2.60 | 2.60 | 2.67 | 2.67 | 2.66 | 2.73 |
| 11.32 | 2.57 | 2.58 | 2.61 | 2.55 | 2.57 | 2.56 | 2.55 | 2.52 | 2.57 | 2.56 | 2.57 |
| 11.52 | 2.57 | 2.61 | 2.61 | 2.57 | 2.57 | 2.54 | 2.53 | 2.57 | 2.57 | 2.60 | 2.59 |
| 11.72 | 2.57 | 2.61 | 2.63 | 2.63 | 2.60 | 2.53 | 2.55 | 2.50 | 2.53 | 2.53 | 2.52 |
| 11.92 | 2.70 | 2.68 | 2.68 | 2.74 | 2.74 | 2.69 | 2.67 | 2.74 | 2.77 | 2.78 | 2.76 |
| 12.12 | 2.72 | 2.83 | 2.76 | 2.81 | 2.72 | 2.80 | 2.78 | 2.82 | 2.83 | 2.78 | 2.78 |
| 12.32 | 2.68 | 2.73 | 2.66 | 2.65 | 2.68 | 2.69 | 2.67 | 2.63 | 2.63 | 2.67 | 2.64 |
| 12.52 | 2.68 | 2.67 | 2.62 | 2.66 | 2.57 | 2.59 | 2.54 | 2.55 | 2.56 | 2.51 | 2.52 |
| 12.72 | 2.39 | 2.44 | 2.42 | 2.36 | 2.37 | 2.34 | 2.40 | 2.41 | 2.40 | 2.37 | 2.38 |
| 12.92 | 2.49 | 2.50 | 2.53 | 2.54 | 2.49 | 2.47 | 2.49 | 2.44 | 2.49 | 2.50 | 2.52 |
| 13.12 | 2.52 | 2.55 | 2.52 | 2.49 | 2.50 | 2.47 | 2.50 | 2.48 | 2.45 | 2.41 | 2.49 |
| 13.32 | 2.64 | 2.63 | 2.62 | 2.62 | 2.65 | 2.61 | 2.60 | 2.65 | 2.66 | 2.64 | 2.65 |
| 13.52 | 2.44 | 2.44 | 2.50 | 2.42 | 2.39 | 2.46 | 2.44 | 2.42 | 2.43 | 2.42 | 2.47 |
| 13.72 | 2.44 | 2.46 | 2.48 | 2.45 | 2.45 | 2.44 | 2.45 | 2.37 | 2.41 | 2.44 | 2.41 |
| 13.92 | 2.60 | 2.57 | 2.59 | 2.56 | 2.58 | 2.53 | 2.51 | 2.52 | 2.56 | 2.58 | 2.59 |
| 14.00 | 2.56 | 2.56 | 2.58 | 2.58 | 2.56 | 2.57 | 2.53 | 2.49 | 2.49 | 2.50 | 2.50 |
| 14.08 | 2.43 | 2.41 | 2.39 | 2.47 | 2.42 | 2.42 | 2.39 | 2.43 | 2.43 | 2.43 | 2.44 |
| 14.17 | 2.55 | 2.48 | 2.46 | 2.53 | 2.45 | 2.46 | 2.42 | 2.39 | 2.48 | 2.44 | 2.46 |
| 14.27 | 2.63 | 2.66 | 2.59 | 2.55 | 2.53 | 2.54 | 2.52 | 2.53 | 2.46 | 2.43 | 2.46 |
| 14.38 | 2.47 | 2.44 | 2.45 | 2.43 | 2.46 | 2.40 | 2.44 | 2.44 | 2.45 | 2.43 | 2.44 |
| 14.49 | 2.47 | 2.46 | 2.47 | 2.42 | 2.42 | 2.40 | 2.45 | 2.47 | 2.46 | 2.44 | 2.41 |
| 14.61 | 2.60 | 2.61 | 2.54 | 2.53 | 2.55 | 2.54 | 2.51 | 2.51 | 2.48 | 2.50 | 2.55 |
| 14.75 | 2.55 | 2.51 | 2.53 | 2.52 | 2.53 | 2.49 | 2.48 | 2.55 | 2.52 | 2.51 | 2.48 |
| 14.89 | 2.45 | 2.42 | 2.45 | 2.47 | 2.44 | 2.42 | 2.43 | 2.40 | 2.41 | 2.38 | 2.39 |
| 15.05 | 2.46 | 2.49 | 2.48 | 2.46 | 2.45 | 2.40 | 2.43 | 2.44 | 2.43 | 2.37 | 2.40 |
| 15.21 | 2.41 | 2.41 | 2.42 | 2.39 | 2.38 | 2.36 | 2.37 | 2.38 | 2.40 | 2.38 | 2.40 |
| 15.39 | 2.29 | 2.27 | 2.26 | 2.22 | 2.23 | 2.25 | 2.25 | 2.22 | 2.24 | 2.24 | 2.23 |

|        |      |      |      |      |      |      |      |      |      |      |      |
|--------|------|------|------|------|------|------|------|------|------|------|------|
| 15.59  | 2.50 | 2.58 | 2.54 | 2.50 | 2.51 | 2.48 | 2.46 | 2.51 | 2.54 | 2.53 | 2.50 |
| 15.80  | 2.48 | 2.45 | 2.45 | 2.43 | 2.42 | 2.45 | 2.43 | 2.43 | 2.39 | 2.47 | 2.40 |
| 16.02  | 2.34 | 2.31 | 2.34 | 2.34 | 2.31 | 2.29 | 2.31 | 2.23 | 2.26 | 2.23 | 2.23 |
| 16.27  | 2.39 | 2.35 | 2.29 | 2.37 | 2.34 | 2.26 | 2.31 | 2.24 | 2.31 | 2.30 | 2.30 |
| 16.53  | 2.48 | 2.48 | 2.44 | 2.43 | 2.42 | 2.45 | 2.41 | 2.38 | 2.35 | 2.33 | 2.37 |
| 16.81  | 2.54 | 2.47 | 2.50 | 2.47 | 2.49 | 2.48 | 2.48 | 2.46 | 2.51 | 2.42 | 2.44 |
| 17.12  | 2.38 | 2.36 | 2.40 | 2.45 | 2.42 | 2.37 | 2.38 | 2.39 | 2.43 | 2.37 | 2.39 |
| 17.45  | 2.33 | 2.41 | 2.37 | 2.36 | 2.33 | 2.30 | 2.25 | 2.29 | 2.27 | 2.27 | 2.25 |
| 17.81  | 2.38 | 2.38 | 2.37 | 2.38 | 2.41 | 2.39 | 2.34 | 2.35 | 2.35 | 2.37 | 2.42 |
| 18.19  | 2.37 | 2.35 | 2.37 | 2.40 | 2.37 | 2.29 | 2.27 | 2.37 | 2.41 | 2.39 | 2.43 |
| 18.60  | 2.32 | 2.31 | 2.35 | 2.37 | 2.36 | 2.32 | 2.33 | 2.38 | 2.35 | 2.34 | 2.34 |
| 19.05  | 2.40 | 2.44 | 2.45 | 2.45 | 2.42 | 2.40 | 2.43 | 2.42 | 2.45 | 2.39 | 2.41 |
| 19.53  | 2.45 | 2.45 | 2.51 | 2.48 | 2.45 | 2.42 | 2.41 | 2.42 | 2.44 | 2.41 | 2.44 |
| 20.05  | 2.42 | 2.43 | 2.46 | 2.48 | 2.44 | 2.45 | 2.39 | 2.39 | 2.41 | 2.41 | 2.39 |
| 20.61  | 2.27 | 2.26 | 2.25 | 2.27 | 2.22 | 2.24 | 2.17 | 2.18 | 2.19 | 2.18 | 2.12 |
| 21.22  | 2.24 | 2.23 | 2.14 | 2.20 | 2.20 | 2.21 | 2.22 | 2.20 | 2.20 | 2.15 | 2.24 |
| 21.87  | 2.39 | 2.39 | 2.35 | 2.34 | 2.32 | 2.33 | 2.30 | 2.26 | 2.26 | 2.24 | 2.22 |
| 22.57  | 2.26 | 2.31 | 2.26 | 2.19 | 2.24 | 2.20 | 2.19 | 2.18 | 2.23 | 2.16 | 2.14 |
| 23.33  | 2.23 | 2.18 | 2.18 | 2.26 | 2.26 | 2.27 | 2.16 | 2.20 | 2.22 | 2.17 | 2.26 |
| 24.15  | 2.11 | 2.11 | 2.11 | 2.09 | 2.05 | 2.01 | 2.09 | 2.05 | 2.11 | 2.07 | 2.09 |
| 25.03  | 2.18 | 2.19 | 2.14 | 2.16 | 2.18 | 2.20 | 2.16 | 2.17 | 2.18 | 2.16 | 2.18 |
| 25.98  | 2.28 | 2.31 | 2.35 | 2.32 | 2.27 | 2.22 | 2.27 | 2.28 | 2.27 | 2.23 | 2.28 |
| 27.01  | 2.23 | 2.20 | 2.21 | 2.23 | 2.21 | 2.21 | 2.23 | 2.19 | 2.19 | 2.13 | 2.22 |
| 28.11  | 2.20 | 2.13 | 2.12 | 2.09 | 2.08 | 2.08 | 2.05 | 2.10 | 2.04 | 2.08 | 2.06 |
| 29.30  | 2.13 | 2.12 | 2.16 | 2.16 | 2.10 | 2.08 | 2.09 | 2.11 | 2.10 | 2.15 | 2.15 |
| 30.59  | 2.14 | 2.07 | 2.07 | 2.08 | 2.07 | 2.02 | 2.09 | 2.03 | 2.04 | 2.03 | 2.08 |
| 31.98  | 2.14 | 2.14 | 2.19 | 2.16 | 2.19 | 2.14 | 2.20 | 2.16 | 2.11 | 2.16 | 2.22 |
| 33.47  | 2.10 | 2.05 | 2.08 | 2.09 | 2.10 | 2.07 | 2.08 | 2.10 | 2.05 | 2.07 | 2.05 |
| 35.09  | 2.07 | 2.10 | 2.09 | 2.08 | 2.07 | 2.10 | 2.09 | 2.07 | 2.07 | 2.02 | 2.11 |
| 36.83  | 2.09 | 2.07 | 2.03 | 2.04 | 2.07 | 2.04 | 2.01 | 1.99 | 1.98 | 2.05 | 2.04 |
| 38.71  | 1.96 | 1.96 | 1.90 | 1.93 | 1.89 | 1.92 | 1.89 | 1.87 | 1.88 | 1.88 | 1.91 |
| 40.73  | 1.91 | 1.86 | 1.88 | 1.91 | 1.93 | 1.86 | 1.90 | 1.86 | 1.85 | 1.85 | 1.87 |
| 42.92  | 1.88 | 1.89 | 1.88 | 1.91 | 1.90 | 1.92 | 1.91 | 1.89 | 1.90 | 1.87 | 1.92 |
| 45.27  | 1.91 | 1.96 | 1.96 | 1.92 | 1.95 | 1.95 | 1.95 | 1.99 | 1.96 | 1.91 | 1.92 |
| 47.81  | 1.92 | 1.95 | 1.93 | 1.92 | 1.85 | 1.86 | 1.84 | 1.86 | 1.89 | 1.86 | 1.87 |
| 50.55  | 1.91 | 1.87 | 1.88 | 1.90 | 1.88 | 1.91 | 1.88 | 1.95 | 1.91 | 1.86 | 1.92 |
| 53.51  | 1.82 | 1.81 | 1.74 | 1.82 | 1.83 | 1.82 | 1.78 | 1.76 | 1.74 | 1.78 | 1.88 |
| 56.69  | 1.88 | 1.85 | 1.84 | 1.77 | 1.84 | 1.83 | 1.85 | 1.88 | 1.84 | 1.84 | 1.91 |
| 60.13  | 1.91 | 1.96 | 1.98 | 1.95 | 1.85 | 1.85 | 1.87 | 1.93 | 1.88 | 1.84 | 1.85 |
| 63.84  | 1.79 | 1.76 | 1.80 | 1.80 | 1.80 | 1.77 | 1.77 | 1.78 | 1.74 | 1.75 | 1.78 |
| 67.83  | 1.89 | 1.84 | 1.87 | 1.89 | 1.86 | 1.79 | 1.77 | 1.82 | 1.84 | 1.87 | 1.87 |
| 72.15  | 1.89 | 1.90 | 1.91 | 1.88 | 1.92 | 1.89 | 1.84 | 1.87 | 1.88 | 1.85 | 1.84 |
| 76.80  | 1.88 | 1.84 | 1.84 | 1.86 | 1.85 | 1.85 | 1.80 | 1.81 | 1.91 | 1.86 | 1.83 |
| 81.81  | 1.78 | 1.74 | 1.77 | 1.82 | 1.77 | 1.74 | 1.76 | 1.78 | 1.72 | 1.72 | 1.76 |
| 87.22  | 1.73 | 1.71 | 1.68 | 1.73 | 1.69 | 1.70 | 1.68 | 1.65 | 1.73 | 1.67 | 1.67 |
| 93.06  | 1.80 | 1.80 | 1.77 | 1.72 | 1.74 | 1.76 | 1.77 | 1.82 | 1.78 | 1.79 | 1.81 |
| 99.35  | 1.81 | 1.77 | 1.78 | 1.79 | 1.71 | 1.73 | 1.73 | 1.72 | 1.72 | 1.68 | 1.70 |
| 106.13 | 1.71 | 1.70 | 1.71 | 1.77 | 1.75 | 1.76 | 1.73 | 1.72 | 1.71 | 1.69 | 1.71 |
| 113.45 | 1.76 | 1.70 | 1.74 | 1.75 | 1.75 | 1.74 | 1.67 | 1.68 | 1.71 | 1.64 | 1.70 |
| 121.34 | 1.80 | 1.83 | 1.77 | 1.77 | 1.72 | 1.74 | 1.74 | 1.77 | 1.79 | 1.69 | 1.77 |

|         |      |      |      |      |      |      |      |      |      |      |      |
|---------|------|------|------|------|------|------|------|------|------|------|------|
| 129.86  | 1.78 | 1.77 | 1.69 | 1.69 | 1.64 | 1.61 | 1.62 | 1.64 | 1.68 | 1.63 | 1.65 |
| 139.04  | 1.78 | 1.73 | 1.75 | 1.73 | 1.71 | 1.70 | 1.67 | 1.64 | 1.63 | 1.61 | 1.64 |
| 148.94  | 1.82 | 1.82 | 1.81 | 1.82 | 1.74 | 1.74 | 1.74 | 1.79 | 1.75 | 1.75 | 1.75 |
| 159.62  | 1.69 | 1.65 | 1.65 | 1.68 | 1.68 | 1.68 | 1.62 | 1.66 | 1.75 | 1.70 | 1.68 |
| 171.14  | 1.80 | 1.71 | 1.76 | 1.69 | 1.74 | 1.76 | 1.73 | 1.73 | 1.68 | 1.61 | 1.69 |
| 183.56  | 1.80 | 1.78 | 1.73 | 1.78 | 1.78 | 1.72 | 1.71 | 1.66 | 1.69 | 1.66 | 1.73 |
| 196.96  | 1.78 | 1.76 | 1.77 | 1.82 | 1.72 | 1.64 | 1.69 | 1.68 | 1.71 | 1.70 | 1.71 |
| 211.41  | 1.72 | 1.71 | 1.71 | 1.65 | 1.66 | 1.65 | 1.64 | 1.64 | 1.65 | 1.65 | 1.65 |
| 226.99  | 1.78 | 1.76 | 1.75 | 1.70 | 1.65 | 1.68 | 1.57 | 1.61 | 1.60 | 1.60 | 1.59 |
| 243.80  | 1.80 | 1.80 | 1.83 | 1.76 | 1.72 | 1.73 | 1.71 | 1.69 | 1.67 | 1.57 | 1.60 |
| 261.93  | 1.86 | 1.81 | 1.84 | 1.79 | 1.80 | 1.76 | 1.76 | 1.74 | 1.78 | 1.70 | 1.76 |
| 281.48  | 2.01 | 2.01 | 2.00 | 1.95 | 1.91 | 1.95 | 1.91 | 1.89 | 1.86 | 1.82 | 1.81 |
| 302.56  | 1.89 | 1.81 | 1.82 | 1.78 | 1.77 | 1.75 | 1.69 | 1.72 | 1.72 | 1.64 | 1.72 |
| 325.30  | 1.89 | 1.84 | 1.84 | 1.84 | 1.83 | 1.81 | 1.77 | 1.78 | 1.79 | 1.77 | 1.77 |
| 349.83  | 1.87 | 1.87 | 1.89 | 1.87 | 1.86 | 1.86 | 1.76 | 1.77 | 1.80 | 1.78 | 1.72 |
| 376.28  | 2.11 | 1.96 | 1.99 | 1.94 | 1.95 | 1.98 | 1.88 | 1.88 | 1.85 | 1.75 | 1.79 |
| 404.81  | 1.79 | 1.76 | 1.73 | 1.71 | 1.71 | 1.66 | 1.62 | 1.56 | 1.53 | 1.54 | 1.56 |
| 435.58  | 2.10 | 2.11 | 2.03 | 1.99 | 1.97 | 1.99 | 1.94 | 1.91 | 1.90 | 1.86 | 1.88 |
| 468.76  | 2.07 | 2.00 | 2.01 | 2.03 | 1.99 | 1.92 | 1.84 | 1.79 | 1.82 | 1.78 | 1.79 |
| 504.55  | 2.14 | 2.15 | 2.11 | 2.08 | 2.05 | 2.00 | 1.94 | 1.93 | 1.90 | 1.88 | 1.86 |
| 543.15  | 2.18 | 2.18 | 2.10 | 2.13 | 2.06 | 2.04 | 2.05 | 2.00 | 1.95 | 1.90 | 1.94 |
| 584.78  | 2.26 | 2.27 | 2.19 | 2.20 | 2.10 | 2.07 | 2.06 | 2.00 | 2.04 | 2.00 | 1.93 |
| 629.68  | 2.22 | 2.18 | 2.14 | 2.11 | 2.05 | 1.99 | 2.00 | 1.91 | 1.91 | 1.90 | 1.83 |
| 678.10  | 2.51 | 2.49 | 2.41 | 2.37 | 2.29 | 2.24 | 2.25 | 2.19 | 2.20 | 2.13 | 2.10 |
| 730.33  | 2.46 | 2.38 | 2.37 | 2.32 | 2.29 | 2.20 | 2.18 | 2.13 | 2.13 | 2.08 | 2.07 |
| 786.65  | 2.49 | 2.46 | 2.40 | 2.35 | 2.27 | 2.20 | 2.15 | 2.11 | 2.08 | 2.05 | 2.02 |
| 847.40  | 2.70 | 2.68 | 2.58 | 2.52 | 2.45 | 2.42 | 2.39 | 2.39 | 2.27 | 2.22 | 2.21 |
| 912.92  | 2.78 | 2.70 | 2.61 | 2.59 | 2.54 | 2.52 | 2.43 | 2.45 | 2.39 | 2.25 | 2.28 |
| 983.58  | 3.01 | 2.92 | 2.88 | 2.79 | 2.77 | 2.75 | 2.69 | 2.60 | 2.58 | 2.49 | 2.47 |
| 1059.78 | 2.93 | 2.83 | 2.74 | 2.73 | 2.67 | 2.63 | 2.63 | 2.49 | 2.50 | 2.40 | 2.35 |
| 1141.98 | 3.09 | 2.97 | 2.92 | 2.90 | 2.86 | 2.83 | 2.75 | 2.70 | 2.63 | 2.57 | 2.56 |
| 1230.62 | 3.01 | 2.95 | 2.91 | 2.85 | 2.76 | 2.68 | 2.61 | 2.55 | 2.49 | 2.47 | 2.42 |
| 1326.23 | 3.17 | 3.14 | 3.10 | 3.01 | 2.95 | 2.86 | 2.81 | 2.77 | 2.76 | 2.61 | 2.59 |
| 1429.34 | 3.36 | 3.30 | 3.18 | 3.10 | 3.03 | 3.01 | 2.95 | 2.86 | 2.81 | 2.69 | 2.64 |
| 1540.54 | 3.40 | 3.33 | 3.18 | 3.02 | 3.04 | 2.99 | 2.90 | 2.82 | 2.71 | 2.61 | 2.58 |
| 1660.48 | 3.50 | 3.46 | 3.35 | 3.30 | 3.28 | 3.15 | 3.09 | 3.05 | 3.01 | 2.89 | 2.82 |
| 1789.83 | 3.65 | 3.56 | 3.48 | 3.40 | 3.32 | 3.27 | 3.18 | 3.15 | 3.02 | 2.98 | 2.88 |
| 1929.34 | 3.56 | 3.49 | 3.41 | 3.40 | 3.28 | 3.13 | 3.10 | 3.02 | 3.02 | 2.88 | 2.87 |
| 2079.80 | 3.60 | 3.52 | 3.43 | 3.41 | 3.32 | 3.23 | 3.14 | 3.06 | 3.04 | 2.94 | 2.89 |
| 2242.08 | 3.76 | 3.69 | 3.65 | 3.56 | 3.50 | 3.36 | 3.28 | 3.19 | 3.07 | 2.98 | 2.98 |
| 2417.10 | 3.80 | 3.73 | 3.62 | 3.55 | 3.47 | 3.40 | 3.30 | 3.22 | 3.22 | 3.09 | 3.07 |
| 2605.85 | 3.85 | 3.76 | 3.66 | 3.57 | 3.51 | 3.40 | 3.28 | 3.21 | 3.12 | 3.04 | 2.99 |
| 2809.43 | 3.69 | 3.57 | 3.50 | 3.49 | 3.44 | 3.29 | 3.20 | 3.22 | 3.13 | 3.10 | 3.01 |
| 3028.99 | 4.03 | 3.97 | 3.86 | 3.75 | 3.70 | 3.59 | 3.47 | 3.45 | 3.34 | 3.29 | 3.19 |
| 3265.79 | 3.91 | 3.83 | 3.76 | 3.68 | 3.60 | 3.48 | 3.35 | 3.32 | 3.17 | 3.13 | 3.08 |
| 3521.18 | 3.96 | 3.83 | 3.81 | 3.69 | 3.61 | 3.54 | 3.37 | 3.31 | 3.24 | 3.10 | 3.04 |
| 3796.62 | 4.05 | 4.00 | 3.93 | 3.85 | 3.69 | 3.63 | 3.51 | 3.39 | 3.35 | 3.25 | 3.18 |



| Wavelength<br>(nm) | 661.57 | 662.98 | 664.39 | 665.80 | 667.21 | 668.62 | 670.02 |
|--------------------|--------|--------|--------|--------|--------|--------|--------|
| Time<br>(ps)       |        |        |        |        |        |        |        |
| -3.28              | 0.03   | 0.06   | 0.13   | 0.04   | 0.07   | 0.02   | 0.04   |
| -2.78              | 0.11   | 0.07   | 0.01   | 0.05   | 0.11   | 0.10   | 0.16   |
| -2.28              | -0.03  | 0.00   | 0.03   | 0.00   | -0.04  | 0.01   | -0.04  |
| -1.78              | -0.11  | -0.11  | -0.10  | -0.13  | -0.17  | -0.15  | -0.18  |
| -1.28              | 0.02   | -0.02  | -0.02  | 0.00   | -0.04  | 0.03   | 0.04   |
| -0.78              | 0.05   | 0.02   | 0.01   | 0.06   | 0.05   | 0.03   | -0.01  |
| -0.28              | -0.02  | -0.05  | -0.02  | 0.03   | 0.01   | -0.01  | -0.01  |
| 0.22               | 0.01   | 0.01   | 0.01   | 0.01   | -0.06  | 0.00   | 0.03   |
| 0.32               | 0.00   | 0.00   | -0.02  | 0.01   | 0.07   | -0.02  | -0.04  |
| 0.42               | -0.05  | 0.01   | -0.03  | -0.08  | 0.00   | 0.00   | -0.01  |
| 0.52               | -0.02  | -0.04  | -0.02  | -0.07  | -0.08  | -0.11  | -0.09  |
| 0.62               | -0.14  | -0.11  | -0.09  | -0.14  | -0.16  | -0.18  | -0.14  |
| 0.72               | -0.06  | -0.01  | -0.04  | 0.00   | 0.00   | 0.02   | 0.00   |
| 0.77               | -0.19  | -0.15  | -0.19  | -0.12  | -0.12  | -0.14  | -0.19  |
| 0.82               | -0.03  | -0.02  | 0.03   | -0.05  | -0.06  | -0.04  | -0.06  |
| 0.87               | 0.04   | 0.02   | 0.03   | 0.02   | 0.08   | 0.08   | 0.06   |
| 0.92               | 0.03   | 0.04   | -0.02  | -0.01  | -0.01  | -0.02  | 0.01   |
| 0.97               | -0.03  | 0.01   | 0.03   | 0.05   | -0.01  | -0.02  | -0.05  |
| 1.02               | 0.04   | 0.08   | 0.07   | 0.03   | 0.01   | -0.05  | -0.06  |
| 1.07               | -0.05  | -0.03  | -0.01  | -0.07  | -0.07  | -0.08  | -0.09  |
| 1.12               | 0.13   | 0.05   | 0.06   | 0.09   | 0.07   | 0.09   | 0.19   |
| 1.17               | 0.05   | 0.04   | 0.05   | -0.03  | -0.04  | -0.02  | -0.06  |
| 1.22               | 0.02   | 0.08   | 0.02   | 0.00   | 0.01   | -0.02  | -0.05  |
| 1.27               | 0.01   | 0.03   | 0.01   | 0.03   | -0.01  | 0.01   | -0.09  |
| 1.32               | -0.03  | -0.05  | -0.03  | -0.09  | -0.07  | -0.05  | -0.08  |
| 1.37               | -0.09  | -0.06  | -0.03  | -0.06  | -0.08  | -0.07  | -0.09  |
| 1.42               | -0.04  | 0.00   | 0.01   | -0.06  | -0.02  | -0.02  | 0.00   |
| 1.47               | 0.07   | 0.08   | 0.05   | -0.01  | -0.07  | -0.02  | 0.04   |
| 1.52               | 0.02   | 0.02   | -0.01  | -0.01  | 0.04   | 0.00   | -0.03  |
| 1.57               | -0.08  | -0.09  | -0.06  | -0.11  | -0.09  | -0.11  | -0.11  |
| 1.62               | 0.40   | 0.42   | 0.40   | 0.35   | 0.35   | 0.27   | 0.29   |
| 1.67               | 4.12   | 4.00   | 3.89   | 3.81   | 3.68   | 3.58   | 3.50   |
| 1.72               | 7.98   | 7.85   | 7.66   | 7.49   | 7.28   | 7.19   | 7.15   |
| 1.77               | 8.85   | 8.79   | 8.70   | 8.63   | 8.55   | 8.52   | 8.54   |
| 1.82               | 8.35   | 8.35   | 8.27   | 8.31   | 8.35   | 8.39   | 8.53   |
| 1.87               | 7.78   | 7.84   | 7.90   | 7.86   | 7.86   | 8.00   | 8.14   |
| 1.92               | 7.46   | 7.51   | 7.51   | 7.51   | 7.55   | 7.67   | 7.83   |
| 1.97               | 7.10   | 7.23   | 7.26   | 7.27   | 7.37   | 7.46   | 7.64   |
| 2.02               | 6.85   | 6.89   | 6.97   | 6.99   | 7.00   | 7.12   | 7.34   |
| 2.07               | 6.67   | 6.71   | 6.73   | 6.73   | 6.78   | 6.85   | 6.96   |
| 2.12               | 6.72   | 6.75   | 6.77   | 6.74   | 6.75   | 6.89   | 7.00   |
| 2.17               | 6.14   | 6.19   | 6.21   | 6.21   | 6.25   | 6.35   | 6.49   |
| 2.22               | 5.97   | 6.02   | 6.03   | 6.03   | 6.06   | 6.11   | 6.24   |
| 2.27               | 5.79   | 5.82   | 5.87   | 5.96   | 5.98   | 6.07   | 6.08   |
| 2.32               | 5.64   | 5.66   | 5.70   | 5.70   | 5.69   | 5.79   | 5.93   |
| 2.37               | 5.82   | 5.84   | 5.80   | 5.79   | 5.86   | 5.95   | 6.01   |
| 2.42               | 5.53   | 5.58   | 5.58   | 5.59   | 5.63   | 5.62   | 5.79   |

|      |      |      |      |      |      |      |      |
|------|------|------|------|------|------|------|------|
| 2.47 | 5.33 | 5.31 | 5.29 | 5.31 | 5.33 | 5.38 | 5.42 |
| 2.52 | 5.29 | 5.36 | 5.33 | 5.31 | 5.29 | 5.40 | 5.47 |
| 2.57 | 5.16 | 5.14 | 5.15 | 5.20 | 5.22 | 5.30 | 5.39 |
| 2.62 | 4.98 | 4.98 | 5.06 | 5.05 | 5.09 | 5.13 | 5.26 |
| 2.67 | 4.98 | 5.00 | 4.96 | 4.94 | 4.95 | 4.97 | 5.04 |
| 2.72 | 4.87 | 4.92 | 4.98 | 4.94 | 4.97 | 5.00 | 5.09 |
| 2.77 | 4.94 | 4.96 | 4.89 | 4.90 | 4.90 | 4.90 | 5.02 |
| 2.82 | 4.81 | 4.82 | 4.78 | 4.82 | 4.79 | 4.86 | 4.93 |
| 2.87 | 4.80 | 4.82 | 4.83 | 4.84 | 4.89 | 4.90 | 4.96 |
| 2.92 | 4.68 | 4.69 | 4.62 | 4.62 | 4.64 | 4.73 | 4.77 |
| 2.97 | 4.67 | 4.71 | 4.69 | 4.64 | 4.64 | 4.75 | 4.83 |
| 3.02 | 4.62 | 4.64 | 4.68 | 4.67 | 4.62 | 4.67 | 4.75 |
| 3.07 | 4.69 | 4.75 | 4.72 | 4.74 | 4.69 | 4.72 | 4.81 |
| 3.12 | 4.65 | 4.64 | 4.65 | 4.70 | 4.72 | 4.78 | 4.84 |
| 3.17 | 4.53 | 4.55 | 4.57 | 4.52 | 4.50 | 4.51 | 4.64 |
| 3.22 | 4.42 | 4.44 | 4.44 | 4.37 | 4.37 | 4.40 | 4.53 |
| 3.27 | 4.31 | 4.33 | 4.32 | 4.38 | 4.38 | 4.43 | 4.45 |
| 3.32 | 4.51 | 4.50 | 4.51 | 4.50 | 4.49 | 4.57 | 4.66 |
| 3.37 | 4.34 | 4.37 | 4.42 | 4.42 | 4.35 | 4.44 | 4.47 |
| 3.42 | 4.35 | 4.35 | 4.39 | 4.36 | 4.32 | 4.36 | 4.47 |
| 3.47 | 4.33 | 4.32 | 4.34 | 4.30 | 4.32 | 4.38 | 4.43 |
| 3.52 | 4.21 | 4.28 | 4.22 | 4.26 | 4.26 | 4.30 | 4.41 |
| 3.57 | 4.23 | 4.21 | 4.18 | 4.12 | 4.18 | 4.18 | 4.29 |
| 3.62 | 4.06 | 4.07 | 4.13 | 4.15 | 4.10 | 4.09 | 4.20 |
| 3.67 | 4.09 | 4.06 | 4.09 | 4.03 | 4.02 | 4.10 | 4.27 |
| 3.72 | 4.05 | 3.99 | 4.09 | 4.09 | 4.07 | 4.11 | 4.21 |
| 3.92 | 4.05 | 4.07 | 4.08 | 4.10 | 4.08 | 4.09 | 4.15 |
| 4.12 | 3.84 | 3.80 | 3.82 | 3.72 | 3.74 | 3.77 | 3.83 |
| 4.32 | 3.75 | 3.80 | 3.77 | 3.80 | 3.82 | 3.89 | 4.00 |
| 4.52 | 3.67 | 3.64 | 3.67 | 3.66 | 3.66 | 3.72 | 3.82 |
| 4.72 | 3.67 | 3.66 | 3.67 | 3.60 | 3.63 | 3.73 | 3.78 |
| 4.92 | 3.56 | 3.55 | 3.62 | 3.52 | 3.57 | 3.61 | 3.68 |
| 5.12 | 3.39 | 3.38 | 3.37 | 3.39 | 3.44 | 3.46 | 3.55 |
| 5.32 | 3.41 | 3.40 | 3.42 | 3.37 | 3.35 | 3.44 | 3.55 |
| 5.52 | 3.27 | 3.27 | 3.30 | 3.36 | 3.35 | 3.35 | 3.44 |
| 5.72 | 3.25 | 3.31 | 3.30 | 3.38 | 3.29 | 3.37 | 3.44 |
| 5.92 | 3.27 | 3.32 | 3.36 | 3.32 | 3.34 | 3.30 | 3.32 |
| 6.12 | 3.17 | 3.21 | 3.25 | 3.26 | 3.22 | 3.26 | 3.26 |
| 6.32 | 3.24 | 3.23 | 3.22 | 3.19 | 3.18 | 3.20 | 3.25 |
| 6.52 | 3.04 | 3.06 | 3.03 | 3.03 | 3.04 | 3.06 | 3.14 |
| 6.72 | 3.05 | 3.08 | 3.09 | 3.09 | 3.16 | 3.17 | 3.26 |
| 6.92 | 3.02 | 3.05 | 3.01 | 3.04 | 3.15 | 3.15 | 3.29 |
| 7.12 | 3.13 | 3.15 | 3.18 | 3.14 | 3.09 | 3.16 | 3.24 |
| 7.32 | 2.99 | 2.99 | 3.07 | 3.08 | 3.10 | 3.14 | 3.27 |
| 7.52 | 2.95 | 2.96 | 2.98 | 3.00 | 3.01 | 3.04 | 3.09 |
| 7.72 | 3.07 | 3.11 | 3.07 | 3.14 | 3.12 | 3.18 | 3.18 |
| 7.92 | 2.86 | 2.86 | 2.89 | 2.92 | 2.95 | 3.01 | 3.02 |
| 8.12 | 2.83 | 2.90 | 2.89 | 2.89 | 2.89 | 2.98 | 3.07 |
| 8.32 | 2.94 | 2.92 | 2.91 | 2.86 | 2.89 | 2.99 | 3.04 |
| 8.52 | 2.87 | 2.86 | 2.92 | 2.83 | 2.90 | 3.00 | 3.04 |

|       |      |      |      |      |      |      |      |
|-------|------|------|------|------|------|------|------|
| 8.72  | 3.00 | 3.00 | 3.00 | 3.05 | 3.05 | 3.12 | 3.20 |
| 8.92  | 2.99 | 2.96 | 2.95 | 2.96 | 2.98 | 2.97 | 3.02 |
| 9.12  | 2.82 | 2.84 | 2.87 | 2.82 | 2.85 | 2.91 | 3.02 |
| 9.32  | 2.78 | 2.84 | 2.85 | 2.82 | 2.79 | 2.89 | 2.98 |
| 9.52  | 2.84 | 2.92 | 2.96 | 2.94 | 2.97 | 2.99 | 3.02 |
| 9.72  | 2.69 | 2.75 | 2.79 | 2.79 | 2.81 | 2.84 | 2.87 |
| 9.92  | 2.51 | 2.51 | 2.51 | 2.53 | 2.55 | 2.57 | 2.64 |
| 10.12 | 2.78 | 2.78 | 2.77 | 2.78 | 2.79 | 2.88 | 2.93 |
| 10.32 | 2.58 | 2.62 | 2.57 | 2.59 | 2.60 | 2.59 | 2.65 |
| 10.52 | 2.70 | 2.63 | 2.73 | 2.71 | 2.75 | 2.75 | 2.78 |
| 10.72 | 2.77 | 2.79 | 2.79 | 2.85 | 2.86 | 2.87 | 2.92 |
| 10.92 | 2.61 | 2.59 | 2.62 | 2.69 | 2.75 | 2.80 | 2.86 |
| 11.12 | 2.71 | 2.68 | 2.70 | 2.76 | 2.78 | 2.76 | 2.83 |
| 11.32 | 2.55 | 2.62 | 2.61 | 2.64 | 2.64 | 2.69 | 2.81 |
| 11.52 | 2.59 | 2.64 | 2.62 | 2.64 | 2.67 | 2.74 | 2.78 |
| 11.72 | 2.57 | 2.51 | 2.55 | 2.56 | 2.61 | 2.63 | 2.78 |
| 11.92 | 2.78 | 2.77 | 2.79 | 2.80 | 2.88 | 2.88 | 2.84 |
| 12.12 | 2.83 | 2.77 | 2.82 | 2.82 | 2.85 | 2.90 | 2.92 |
| 12.32 | 2.63 | 2.65 | 2.70 | 2.66 | 2.64 | 2.71 | 2.74 |
| 12.52 | 2.53 | 2.56 | 2.63 | 2.59 | 2.61 | 2.65 | 2.63 |
| 12.72 | 2.40 | 2.43 | 2.43 | 2.42 | 2.45 | 2.55 | 2.62 |
| 12.92 | 2.53 | 2.52 | 2.55 | 2.57 | 2.63 | 2.63 | 2.70 |
| 13.12 | 2.46 | 2.54 | 2.60 | 2.55 | 2.54 | 2.56 | 2.62 |
| 13.32 | 2.65 | 2.66 | 2.67 | 2.67 | 2.70 | 2.86 | 2.89 |
| 13.52 | 2.50 | 2.49 | 2.52 | 2.48 | 2.50 | 2.59 | 2.69 |
| 13.72 | 2.46 | 2.44 | 2.42 | 2.44 | 2.48 | 2.51 | 2.53 |
| 13.92 | 2.53 | 2.55 | 2.59 | 2.62 | 2.61 | 2.66 | 2.82 |
| 14.00 | 2.59 | 2.57 | 2.61 | 2.58 | 2.55 | 2.64 | 2.79 |
| 14.08 | 2.45 | 2.48 | 2.47 | 2.49 | 2.49 | 2.59 | 2.72 |
| 14.17 | 2.48 | 2.45 | 2.48 | 2.47 | 2.50 | 2.54 | 2.66 |
| 14.27 | 2.44 | 2.56 | 2.53 | 2.52 | 2.45 | 2.57 | 2.61 |
| 14.38 | 2.47 | 2.45 | 2.52 | 2.47 | 2.47 | 2.54 | 2.63 |
| 14.49 | 2.42 | 2.46 | 2.48 | 2.50 | 2.48 | 2.53 | 2.58 |
| 14.61 | 2.53 | 2.54 | 2.61 | 2.53 | 2.55 | 2.57 | 2.62 |
| 14.75 | 2.50 | 2.46 | 2.50 | 2.41 | 2.51 | 2.54 | 2.63 |
| 14.89 | 2.43 | 2.43 | 2.43 | 2.40 | 2.45 | 2.48 | 2.59 |
| 15.05 | 2.42 | 2.37 | 2.42 | 2.38 | 2.42 | 2.41 | 2.51 |
| 15.21 | 2.41 | 2.46 | 2.48 | 2.45 | 2.49 | 2.50 | 2.61 |
| 15.39 | 2.23 | 2.33 | 2.39 | 2.36 | 2.39 | 2.41 | 2.50 |
| 15.59 | 2.46 | 2.46 | 2.50 | 2.52 | 2.60 | 2.55 | 2.70 |
| 15.80 | 2.47 | 2.43 | 2.47 | 2.48 | 2.53 | 2.60 | 2.68 |
| 16.02 | 2.31 | 2.30 | 2.30 | 2.25 | 2.32 | 2.37 | 2.48 |
| 16.27 | 2.33 | 2.35 | 2.34 | 2.40 | 2.43 | 2.56 | 2.56 |
| 16.53 | 2.41 | 2.42 | 2.39 | 2.44 | 2.41 | 2.48 | 2.56 |
| 16.81 | 2.51 | 2.53 | 2.51 | 2.48 | 2.56 | 2.57 | 2.65 |
| 17.12 | 2.35 | 2.43 | 2.45 | 2.42 | 2.46 | 2.42 | 2.49 |
| 17.45 | 2.30 | 2.27 | 2.38 | 2.40 | 2.37 | 2.40 | 2.49 |
| 17.81 | 2.39 | 2.46 | 2.44 | 2.40 | 2.44 | 2.50 | 2.55 |
| 18.19 | 2.36 | 2.41 | 2.43 | 2.48 | 2.50 | 2.57 | 2.61 |
| 18.60 | 2.37 | 2.34 | 2.38 | 2.40 | 2.42 | 2.47 | 2.52 |

|        |      |      |      |      |      |      |      |
|--------|------|------|------|------|------|------|------|
| 19.05  | 2.45 | 2.42 | 2.44 | 2.44 | 2.44 | 2.53 | 2.61 |
| 19.53  | 2.46 | 2.41 | 2.44 | 2.40 | 2.33 | 2.42 | 2.47 |
| 20.05  | 2.38 | 2.39 | 2.43 | 2.40 | 2.47 | 2.45 | 2.54 |
| 20.61  | 2.19 | 2.19 | 2.23 | 2.20 | 2.21 | 2.27 | 2.34 |
| 21.22  | 2.29 | 2.30 | 2.28 | 2.29 | 2.30 | 2.40 | 2.50 |
| 21.87  | 2.25 | 2.32 | 2.25 | 2.28 | 2.28 | 2.38 | 2.43 |
| 22.57  | 2.19 | 2.21 | 2.21 | 2.28 | 2.23 | 2.30 | 2.38 |
| 23.33  | 2.22 | 2.24 | 2.27 | 2.29 | 2.33 | 2.43 | 2.46 |
| 24.15  | 2.13 | 2.14 | 2.18 | 2.26 | 2.27 | 2.32 | 2.37 |
| 25.03  | 2.19 | 2.24 | 2.26 | 2.23 | 2.26 | 2.23 | 2.30 |
| 25.98  | 2.25 | 2.23 | 2.29 | 2.25 | 2.23 | 2.24 | 2.27 |
| 27.01  | 2.19 | 2.17 | 2.13 | 2.15 | 2.19 | 2.28 | 2.33 |
| 28.11  | 2.14 | 2.14 | 2.20 | 2.21 | 2.17 | 2.24 | 2.27 |
| 29.30  | 2.15 | 2.16 | 2.17 | 2.17 | 2.21 | 2.28 | 2.35 |
| 30.59  | 2.08 | 2.08 | 2.11 | 2.12 | 2.16 | 2.19 | 2.22 |
| 31.98  | 2.17 | 2.24 | 2.22 | 2.17 | 2.22 | 2.26 | 2.34 |
| 33.47  | 2.10 | 2.10 | 2.10 | 2.14 | 2.11 | 2.13 | 2.22 |
| 35.09  | 2.12 | 2.07 | 2.06 | 2.09 | 2.11 | 2.16 | 2.20 |
| 36.83  | 2.09 | 2.07 | 2.10 | 2.18 | 2.13 | 2.19 | 2.28 |
| 38.71  | 1.85 | 1.90 | 1.87 | 1.93 | 1.95 | 2.04 | 2.05 |
| 40.73  | 1.86 | 1.83 | 1.86 | 1.87 | 1.89 | 1.93 | 1.99 |
| 42.92  | 1.93 | 1.97 | 1.97 | 1.94 | 2.00 | 2.06 | 2.09 |
| 45.27  | 1.96 | 2.00 | 1.97 | 1.93 | 1.97 | 1.91 | 1.93 |
| 47.81  | 1.87 | 1.92 | 1.92 | 1.93 | 1.97 | 2.00 | 2.08 |
| 50.55  | 1.96 | 1.97 | 1.91 | 1.97 | 1.98 | 1.99 | 2.09 |
| 53.51  | 1.88 | 1.88 | 1.86 | 1.82 | 1.84 | 1.91 | 2.00 |
| 56.69  | 1.93 | 1.96 | 1.98 | 1.95 | 2.02 | 2.09 | 2.12 |
| 60.13  | 1.88 | 1.90 | 1.94 | 1.91 | 1.96 | 1.94 | 2.00 |
| 63.84  | 1.80 | 1.77 | 1.78 | 1.83 | 1.90 | 1.93 | 1.98 |
| 67.83  | 1.87 | 1.91 | 1.94 | 1.96 | 1.94 | 1.97 | 2.01 |
| 72.15  | 1.85 | 1.87 | 1.87 | 1.83 | 1.83 | 1.85 | 1.85 |
| 76.80  | 1.89 | 1.92 | 1.92 | 1.95 | 1.96 | 2.01 | 2.00 |
| 81.81  | 1.78 | 1.79 | 1.80 | 1.77 | 1.79 | 1.86 | 1.90 |
| 87.22  | 1.65 | 1.71 | 1.67 | 1.68 | 1.70 | 1.72 | 1.76 |
| 93.06  | 1.87 | 1.91 | 1.92 | 1.89 | 1.93 | 1.98 | 1.99 |
| 99.35  | 1.72 | 1.68 | 1.70 | 1.74 | 1.72 | 1.79 | 1.84 |
| 106.13 | 1.73 | 1.76 | 1.77 | 1.82 | 1.80 | 1.86 | 1.87 |
| 113.45 | 1.67 | 1.68 | 1.67 | 1.70 | 1.72 | 1.74 | 1.81 |
| 121.34 | 1.75 | 1.80 | 1.81 | 1.79 | 1.81 | 1.90 | 1.95 |
| 129.86 | 1.70 | 1.65 | 1.66 | 1.78 | 1.76 | 1.84 | 1.82 |
| 139.04 | 1.60 | 1.61 | 1.66 | 1.62 | 1.62 | 1.65 | 1.60 |
| 148.94 | 1.74 | 1.79 | 1.80 | 1.74 | 1.76 | 1.82 | 1.88 |
| 159.62 | 1.71 | 1.70 | 1.70 | 1.76 | 1.80 | 1.83 | 1.85 |
| 171.14 | 1.66 | 1.72 | 1.70 | 1.65 | 1.65 | 1.71 | 1.81 |
| 183.56 | 1.76 | 1.78 | 1.71 | 1.72 | 1.69 | 1.75 | 1.86 |
| 196.96 | 1.65 | 1.71 | 1.71 | 1.74 | 1.71 | 1.77 | 1.82 |
| 211.41 | 1.65 | 1.66 | 1.75 | 1.74 | 1.72 | 1.71 | 1.74 |
| 226.99 | 1.60 | 1.64 | 1.64 | 1.66 | 1.75 | 1.78 | 1.88 |
| 243.80 | 1.57 | 1.65 | 1.66 | 1.62 | 1.61 | 1.62 | 1.65 |
| 261.93 | 1.77 | 1.78 | 1.74 | 1.73 | 1.78 | 1.80 | 1.80 |

|         |      |      |      |      |      |      |      |
|---------|------|------|------|------|------|------|------|
| 281.48  | 1.81 | 1.85 | 1.78 | 1.75 | 1.74 | 1.77 | 1.85 |
| 302.56  | 1.70 | 1.75 | 1.73 | 1.75 | 1.71 | 1.72 | 1.79 |
| 325.30  | 1.74 | 1.80 | 1.77 | 1.75 | 1.76 | 1.73 | 1.76 |
| 349.83  | 1.71 | 1.72 | 1.73 | 1.73 | 1.70 | 1.68 | 1.76 |
| 376.28  | 1.82 | 1.78 | 1.73 | 1.70 | 1.69 | 1.75 | 1.78 |
| 404.81  | 1.56 | 1.57 | 1.55 | 1.57 | 1.60 | 1.62 | 1.69 |
| 435.58  | 1.83 | 1.90 | 1.87 | 1.82 | 1.80 | 1.80 | 1.86 |
| 468.76  | 1.76 | 1.77 | 1.70 | 1.69 | 1.74 | 1.75 | 1.78 |
| 504.55  | 1.85 | 1.83 | 1.77 | 1.77 | 1.74 | 1.87 | 1.89 |
| 543.15  | 1.94 | 1.89 | 1.90 | 1.86 | 1.84 | 1.87 | 1.83 |
| 584.78  | 1.96 | 1.97 | 1.92 | 1.93 | 1.91 | 1.97 | 2.01 |
| 629.68  | 1.81 | 1.91 | 1.87 | 1.84 | 1.79 | 1.84 | 1.86 |
| 678.10  | 2.05 | 2.02 | 2.02 | 2.03 | 1.98 | 2.05 | 2.01 |
| 730.33  | 2.02 | 2.06 | 2.04 | 2.03 | 1.99 | 2.06 | 2.08 |
| 786.65  | 1.97 | 2.03 | 2.01 | 2.01 | 2.00 | 2.09 | 2.09 |
| 847.40  | 2.18 | 2.24 | 2.18 | 2.11 | 2.10 | 2.07 | 2.14 |
| 912.92  | 2.23 | 2.21 | 2.20 | 2.20 | 2.12 | 2.19 | 2.20 |
| 983.58  | 2.42 | 2.38 | 2.35 | 2.28 | 2.26 | 2.24 | 2.24 |
| 1059.78 | 2.34 | 2.33 | 2.30 | 2.23 | 2.12 | 2.15 | 2.13 |
| 1141.98 | 2.55 | 2.48 | 2.40 | 2.35 | 2.31 | 2.29 | 2.25 |
| 1230.62 | 2.39 | 2.29 | 2.21 | 2.22 | 2.18 | 2.22 | 2.25 |
| 1326.23 | 2.48 | 2.45 | 2.46 | 2.36 | 2.38 | 2.31 | 2.25 |
| 1429.34 | 2.56 | 2.60 | 2.56 | 2.49 | 2.39 | 2.40 | 2.41 |
| 1540.54 | 2.52 | 2.47 | 2.45 | 2.37 | 2.34 | 2.34 | 2.33 |
| 1660.48 | 2.77 | 2.74 | 2.67 | 2.57 | 2.54 | 2.52 | 2.56 |
| 1789.83 | 2.90 | 2.78 | 2.73 | 2.66 | 2.63 | 2.65 | 2.69 |
| 1929.34 | 2.70 | 2.72 | 2.68 | 2.63 | 2.65 | 2.58 | 2.54 |
| 2079.80 | 2.83 | 2.73 | 2.73 | 2.69 | 2.61 | 2.58 | 2.54 |
| 2242.08 | 2.87 | 2.83 | 2.79 | 2.69 | 2.63 | 2.60 | 2.61 |
| 2417.10 | 3.01 | 2.94 | 2.88 | 2.80 | 2.75 | 2.76 | 2.81 |
| 2605.85 | 2.89 | 2.83 | 2.82 | 2.69 | 2.69 | 2.62 | 2.68 |
| 2809.43 | 3.00 | 2.91 | 2.82 | 2.78 | 2.76 | 2.68 | 2.69 |
| 3028.99 | 3.15 | 3.03 | 2.99 | 2.92 | 2.85 | 2.77 | 2.82 |
| 3265.79 | 3.01 | 2.94 | 2.84 | 2.80 | 2.75 | 2.77 | 2.79 |
| 3521.18 | 2.94 | 2.88 | 2.82 | 2.74 | 2.65 | 2.61 | 2.61 |
| 3796.62 | 3.08 | 2.98 | 2.90 | 2.83 | 2.75 | 2.73 | 2.68 |

**Table S7.** Raw data of fs-TA signals of D-RC-A collected under VIS ( $\lambda_{\text{ex}} = 513$  nm) excitation in the  $\lambda_{\text{pr}} = 318\text{--}670$  nm regime, the unit of  $\Delta A$  in the table is mOD.

| Wavelength (nm) \ Time (ps) | 318.42 | 319.85 | 321.27 | 322.70 | 324.12 | 325.54 | 326.97 | 328.39 | 329.82 | 331.24 | 332.67 |
|-----------------------------|--------|--------|--------|--------|--------|--------|--------|--------|--------|--------|--------|
| -3.78                       | 0.08   | -0.55  | -1.77  | 0.50   | -0.31  | 0.50   | -1.07  | -0.85  | -0.25  | -0.61  | 0.51   |
| -3.28                       | -1.61  | 1.74   | 0.24   | -0.50  | 1.37   | -0.04  | -0.49  | 0.62   | 0.34   | 0.55   | -0.14  |
| -2.78                       | 0.85   | -0.58  | 1.20   | -0.09  | -0.17  | 0.34   | -0.32  | -0.28  | -0.01  | 0.90   | -0.37  |
| -2.28                       | 0.58   | 0.81   | 0.78   | -0.72  | 0.48   | 1.74   | -0.37  | 0.00   | -0.12  | 0.20   | -0.57  |
| -1.78                       | 0.18   | -0.25  | -0.65  | 0.23   | 0.19   | -0.32  | 1.27   | -0.44  | -0.56  | -0.10  | 0.97   |
| -1.28                       | 0.34   | -1.06  | 0.34   | -0.02  | -0.41  | -0.22  | 0.61   | 0.19   | -0.29  | -0.71  | -0.30  |
| -0.78                       | 0.47   | -1.28  | 0.45   | 0.70   | -0.71  | -2.21  | -0.17  | 0.68   | -0.03  | -0.47  | -0.54  |

|       |       |       |       |       |       |        |        |        |        |        |        |
|-------|-------|-------|-------|-------|-------|--------|--------|--------|--------|--------|--------|
| -0.28 | -0.89 | 1.16  | -0.59 | -0.11 | -0.46 | 0.22   | 0.52   | 0.08   | 0.92   | 0.24   | 0.43   |
| -0.18 | -0.35 | -1.44 | 0.92  | -0.35 | -0.19 | -0.95  | 0.83   | 0.39   | -0.53  | 0.56   | 0.26   |
| -0.08 | 0.17  | -2.21 | 0.13  | -1.57 | 0.74  | 0.32   | -0.11  | 0.77   | 0.25   | 0.76   | 0.37   |
| 0.02  | 0.73  | -0.44 | -0.72 | -0.58 | -0.86 | -1.48  | -1.04  | 0.04   | 0.38   | -0.30  | -0.07  |
| 0.12  | -1.09 | 0.81  | -1.07 | -1.97 | -1.36 | -0.42  | 0.50   | -0.40  | 0.28   | 0.22   | 0.18   |
| 0.22  | -0.32 | -1.21 | -0.23 | -0.42 | 0.58  | -1.91  | 0.45   | 1.07   | 0.02   | 0.58   | -0.42  |
| 0.27  | 1.25  | -0.31 | -2.10 | -2.87 | -1.09 | -1.53  | -1.59  | 0.31   | 0.08   | 0.49   | 0.41   |
| 0.32  | 4.02  | 2.98  | 4.09  | 4.22  | 4.12  | -1.91  | -5.40  | -6.48  | -4.53  | -2.99  | -0.38  |
| 0.37  | -2.38 | -1.04 | 3.07  | 5.65  | 8.69  | 11.13  | 11.03  | 4.72   | -3.24  | -5.84  | -7.49  |
| 0.42  | -2.78 | -3.38 | -2.66 | -5.97 | -6.22 | 0.61   | 10.72  | 20.34  | 25.22  | 26.07  | 18.72  |
| 0.47  | -1.11 | 1.41  | -1.73 | -6.14 | -7.03 | -11.63 | -14.16 | -11.11 | -5.81  | 6.92   | 23.29  |
| 0.52  | 1.98  | -0.39 | 1.19  | -0.57 | -0.47 | -1.78  | -4.62  | -10.01 | -15.61 | -24.34 | -28.53 |
| 0.57  | -0.86 | 0.62  | -0.07 | 0.75  | -1.11 | -0.14  | -0.73  | 1.45   | 0.29   | -2.30  | -6.70  |
| 0.62  | -1.59 | -0.87 | 0.44  | -0.01 | -1.45 | 0.11   | -0.20  | 0.02   | -1.24  | -0.67  | 0.63   |
| 0.67  | -0.22 | -0.59 | -0.80 | -0.07 | 0.06  | 0.54   | 0.37   | -0.93  | -0.29  | 0.45   | 0.12   |
| 0.72  | -1.05 | 0.51  | -0.14 | 0.75  | 0.02  | -0.59  | -0.26  | 0.15   | 0.11   | 0.21   | -0.30  |
| 0.77  | -0.71 | -0.49 | -0.28 | 0.42  | -0.71 | -0.65  | -1.19  | -1.27  | 0.03   | -0.12  | -0.03  |
| 0.82  | -0.48 | 0.36  | -0.96 | -1.67 | 0.36  | -2.24  | -0.93  | 1.41   | -0.40  | -1.26  | -1.79  |
| 0.87  | -0.61 | -0.76 | -0.56 | -2.41 | -1.79 | -0.05  | -1.03  | -0.77  | -0.34  | -0.21  | -0.96  |
| 0.92  | -2.29 | -0.96 | -0.53 | -1.91 | -0.52 | 0.18   | -0.88  | -1.60  | -1.68  | -0.72  | -0.11  |
| 0.97  | -0.88 | 1.51  | -0.93 | -0.04 | -0.99 | -0.14  | 0.03   | -0.79  | -1.21  | -0.78  | -0.86  |
| 1.02  | 0.16  | 0.14  | -0.32 | -1.32 | -0.60 | -0.98  | 0.28   | -0.26  | -1.58  | -0.99  | -0.92  |
| 1.07  | -1.65 | -1.18 | 0.45  | -0.41 | -0.28 | 0.59   | -1.08  | -0.49  | -1.78  | -0.32  | -1.14  |
| 1.12  | -1.66 | -0.98 | -1.00 | -1.71 | -0.19 | -1.53  | -0.80  | -1.32  | -1.85  | -1.27  | -0.97  |
| 1.17  | -1.51 | -0.18 | 0.25  | 0.60  | -0.72 | -0.62  | -1.31  | -0.61  | -2.17  | -1.42  | -1.50  |
| 1.22  | 0.41  | -1.07 | 0.34  | -0.48 | -0.97 | -0.34  | -2.58  | -1.10  | -1.42  | -1.45  | -1.11  |
| 1.27  | -0.23 | -0.09 | 0.28  | -1.80 | -0.19 | -0.84  | -2.22  | -0.82  | -0.93  | -1.08  | -1.21  |
| 1.32  | 0.01  | -0.10 | -0.29 | -1.80 | 0.17  | -1.39  | 0.32   | -0.17  | -1.87  | -0.74  | -1.70  |
| 1.37  | -0.90 | 0.17  | -0.75 | 0.25  | 0.32  | -1.30  | -0.67  | -1.12  | -1.47  | -0.82  | -0.60  |
| 1.42  | -0.92 | 0.49  | 0.49  | -0.02 | -1.13 | -1.97  | -0.99  | -0.41  | -0.98  | -2.22  | -1.23  |
| 1.47  | -0.10 | -0.15 | -1.30 | 0.48  | 0.31  | -0.39  | -1.12  | -1.06  | -1.03  | -0.87  | -0.23  |
| 1.52  | -0.70 | -1.07 | -0.07 | -0.99 | -0.90 | 0.08   | -1.46  | -1.33  | -1.07  | -1.92  | -2.19  |
| 1.57  | -0.05 | -1.15 | 1.18  | -0.58 | -0.37 | -1.03  | -1.84  | -1.75  | -1.31  | -0.04  | -1.27  |
| 1.62  | 0.46  | -1.86 | -1.75 | -1.47 | -0.08 | -1.06  | -1.83  | -1.57  | -1.91  | -1.61  | -1.59  |
| 1.67  | -0.71 | -2.01 | -0.58 | -1.86 | -0.83 | -2.04  | -1.17  | -1.41  | -1.83  | -1.09  | -1.74  |
| 1.72  | -1.18 | -0.14 | -1.04 | -0.95 | -1.27 | -0.68  | -1.07  | -0.15  | -1.75  | -1.52  | -1.22  |
| 1.77  | -2.01 | 0.04  | -2.64 | -2.05 | -0.34 | -1.50  | 0.46   | -1.49  | -1.92  | -1.19  | -1.63  |
| 1.82  | -1.07 | -0.74 | -1.12 | 0.22  | -1.35 | -0.79  | -1.83  | -1.53  | -1.57  | -2.10  | -0.92  |
| 1.87  | -1.01 | 0.49  | -1.13 | -0.10 | -0.34 | -0.32  | -0.88  | -2.54  | -1.36  | -1.07  | -2.65  |
| 1.92  | -2.77 | -1.94 | -1.82 | -1.40 | 0.24  | -1.09  | -1.07  | -0.96  | -1.62  | -1.02  | -1.39  |
| 1.97  | -0.08 | -1.89 | 0.16  | -1.41 | -0.66 | -1.05  | -0.12  | -0.94  | -1.62  | -0.63  | -1.01  |
| 2.02  | -1.46 | -0.21 | -1.00 | -1.26 | -1.27 | -1.06  | -0.79  | -0.12  | -0.80  | -1.08  | -1.02  |
| 2.07  | -0.15 | -0.46 | -0.94 | -0.32 | -0.15 | -0.47  | -1.44  | -1.49  | -0.57  | -2.13  | -1.28  |
| 2.12  | -0.09 | -1.54 | 0.53  | -1.08 | -0.38 | -0.96  | -1.77  | -2.27  | -1.24  | -2.07  | -1.13  |
| 2.17  | -1.71 | -0.66 | -0.48 | -0.93 | -0.50 | -1.98  | -0.09  | -1.33  | -1.20  | -0.83  | -1.35  |
| 2.22  | -0.82 | -1.87 | -0.26 | -0.95 | 0.13  | -1.07  | -0.84  | -0.47  | -0.92  | -0.43  | -0.14  |
| 2.27  | -1.68 | 0.08  | 0.72  | -1.63 | -0.04 | -0.98  | -0.24  | -0.66  | -1.00  | -1.71  | -2.12  |
| 2.32  | 0.04  | -1.83 | -4.40 | -0.42 | -0.06 | -1.60  | -2.43  | -0.99  | -1.06  | -2.37  | -0.62  |
| 2.37  | -0.29 | 0.48  | -1.53 | -0.60 | 0.23  | -0.46  | -3.06  | -0.36  | -1.11  | -2.59  | -1.41  |
| 2.42  | -0.82 | 0.66  | -0.79 | -0.96 | -0.36 | -2.11  | -1.32  | -2.33  | -0.51  | -1.65  | -0.77  |

|       |       |       |       |       |       |       |       |       |       |       |       |
|-------|-------|-------|-------|-------|-------|-------|-------|-------|-------|-------|-------|
| 2.47  | -2.31 | 0.76  | -1.30 | -2.34 | 0.51  | -0.68 | -1.47 | -0.83 | -2.00 | -2.26 | -1.26 |
| 2.52  | 0.68  | -0.74 | -0.98 | -1.87 | -0.28 | -1.51 | -1.12 | -2.13 | -2.28 | -1.24 | -2.18 |
| 2.57  | 0.29  | -0.12 | 0.41  | -0.56 | -0.85 | -1.12 | -0.86 | -1.58 | -2.42 | -1.00 | -2.48 |
| 2.62  | -0.73 | -1.73 | -2.77 | -0.31 | -0.03 | -0.06 | -1.33 | -1.55 | -1.19 | -1.55 | -1.38 |
| 2.67  | -0.39 | -1.21 | -0.66 | -0.35 | -0.80 | -1.63 | -1.53 | -1.52 | -1.76 | -0.85 | -1.00 |
| 2.72  | -0.61 | -1.11 | 1.29  | -2.17 | 0.34  | -1.10 | 0.07  | -1.56 | -1.46 | -0.46 | -1.19 |
| 2.77  | -2.26 | -1.29 | -1.19 | -2.08 | 0.24  | -2.39 | -1.03 | -1.20 | -1.34 | -1.95 | -1.84 |
| 2.82  | 0.54  | -0.19 | -2.38 | -1.62 | -1.23 | -0.99 | -2.16 | -2.33 | -1.15 | -1.71 | -1.03 |
| 2.87  | -0.41 | -0.66 | -0.06 | -0.15 | -1.15 | -1.84 | -1.06 | -1.38 | -1.57 | -1.19 | -1.73 |
| 2.92  | -1.08 | -1.57 | -0.38 | -1.71 | -0.70 | -2.03 | -0.11 | -1.48 | -0.24 | -0.50 | -1.44 |
| 2.97  | -0.86 | -1.02 | -1.34 | -1.16 | -0.46 | -1.90 | -1.48 | -1.06 | -1.29 | -2.00 | -1.50 |
| 3.02  | 0.90  | -1.41 | -2.17 | -1.26 | 0.03  | -0.62 | -0.45 | -0.44 | -1.61 | -1.98 | -0.99 |
| 3.07  | -0.38 | -1.80 | 1.03  | -1.59 | -0.49 | -0.65 | -0.76 | -1.51 | -1.08 | -1.53 | -1.51 |
| 3.12  | 0.00  | -0.51 | -0.53 | -2.02 | -1.73 | -2.47 | -0.40 | -1.72 | -1.99 | -1.84 | -1.26 |
| 3.17  | 1.07  | -0.68 | 0.01  | -3.33 | 0.18  | -1.22 | -0.75 | -1.07 | -0.77 | -2.01 | -2.34 |
| 3.22  | -0.90 | -0.25 | -0.83 | -1.40 | -0.83 | -1.99 | -2.19 | -0.27 | -1.67 | -1.23 | -0.71 |
| 3.42  | -0.61 | -1.33 | -1.21 | -1.07 | -2.06 | -1.22 | -0.87 | -1.12 | -1.50 | -1.95 | -2.04 |
| 3.62  | -0.02 | -0.85 | -1.53 | -2.13 | -1.02 | -2.25 | -1.68 | -0.45 | -1.19 | -1.45 | -0.97 |
| 3.82  | -0.58 | -1.80 | -1.27 | 0.29  | -0.77 | -1.26 | -1.18 | -1.02 | -1.42 | -0.72 | -2.07 |
| 4.02  | 0.05  | -0.90 | -0.65 | -1.96 | 0.09  | -1.91 | -1.85 | -1.15 | -2.01 | -1.26 | -2.13 |
| 4.22  | -0.18 | -0.12 | -1.42 | -1.38 | -1.99 | 0.05  | -0.56 | -1.59 | -1.54 | -0.74 | -1.72 |
| 4.42  | -0.43 | -0.06 | -1.16 | -1.77 | -1.05 | -0.27 | 0.01  | -2.29 | -1.01 | -0.98 | -1.67 |
| 4.62  | 0.63  | -0.68 | -1.90 | -1.27 | -0.61 | -0.11 | -0.68 | 0.35  | -0.85 | -2.16 | -1.44 |
| 4.82  | -1.25 | -0.12 | 0.07  | -1.14 | 0.37  | -1.71 | -1.78 | -1.89 | -2.18 | -2.41 | -1.95 |
| 5.02  | 0.15  | 0.07  | -0.24 | -1.02 | -1.42 | -2.29 | -1.43 | -1.99 | -1.32 | -1.34 | -1.82 |
| 5.22  | -1.37 | 0.49  | -1.05 | -0.56 | -0.70 | -0.48 | -1.38 | -0.37 | -2.56 | -2.12 | -1.03 |
| 5.42  | -1.83 | -1.42 | -1.87 | -0.59 | -0.66 | -1.44 | -0.58 | -1.76 | -2.07 | -2.53 | -1.87 |
| 5.62  | 0.67  | -1.38 | -2.31 | 0.49  | 0.77  | -2.43 | -1.26 | 0.78  | -2.71 | -1.85 | -1.28 |
| 5.82  | 0.36  | -1.77 | -0.93 | -0.34 | -0.05 | -0.89 | -1.64 | -1.35 | -2.24 | -1.35 | -1.32 |
| 6.02  | 0.06  | -1.44 | -0.81 | -1.40 | -2.40 | -0.52 | -1.13 | -1.32 | -1.85 | -1.51 | -1.55 |
| 6.22  | -1.13 | -0.95 | 0.14  | -2.03 | -0.78 | -2.34 | -2.15 | -1.42 | -2.12 | -1.06 | -2.10 |
| 6.42  | -2.09 | -0.47 | -1.53 | -0.91 | -0.54 | -1.14 | -1.35 | -1.76 | -0.30 | -1.22 | -2.38 |
| 6.62  | -0.81 | -1.18 | -0.50 | -1.49 | -2.69 | -0.70 | -2.42 | -1.38 | -1.59 | -0.88 | -1.77 |
| 6.82  | -0.76 | -1.66 | -1.17 | -0.89 | -0.93 | -0.72 | -2.27 | -1.78 | -3.11 | -2.61 | -1.56 |
| 7.02  | -1.99 | -1.53 | -1.75 | -0.60 | -1.46 | -1.15 | -2.27 | -1.99 | -1.30 | -1.44 | -1.15 |
| 7.22  | -1.50 | -2.10 | -2.04 | -0.27 | -1.44 | -3.06 | -1.67 | -1.18 | -0.38 | -0.78 | -1.20 |
| 7.42  | -1.03 | -0.73 | -0.17 | -1.41 | -2.26 | 0.14  | -0.88 | -1.94 | -2.63 | -1.58 | -2.56 |
| 7.62  | -1.28 | -0.70 | -1.90 | -0.80 | -0.90 | -2.67 | -1.67 | -0.82 | -1.99 | -2.38 | -2.19 |
| 7.82  | 0.91  | -1.97 | -0.74 | -0.98 | -2.94 | -1.96 | -1.98 | -1.26 | -2.13 | -2.01 | -2.64 |
| 8.02  | -2.59 | -0.28 | -1.14 | -0.74 | -1.72 | -2.77 | -0.30 | 0.31  | -1.98 | -1.51 | -1.93 |
| 8.22  | -2.79 | -1.02 | -0.44 | -0.44 | -0.39 | -1.05 | -0.74 | -1.08 | -1.55 | -2.16 | -2.48 |
| 8.42  | -0.93 | -0.25 | -0.07 | -2.02 | -1.37 | -3.32 | -1.01 | -1.01 | -2.59 | -1.79 | -2.31 |
| 8.62  | -0.36 | -0.28 | -0.29 | -0.61 | 0.31  | -1.42 | -0.49 | -1.73 | -2.14 | -1.85 | -1.90 |
| 8.82  | -0.65 | 0.47  | -2.03 | -1.17 | -0.48 | -0.91 | -3.57 | -1.20 | -1.24 | -1.97 | -2.05 |
| 9.02  | -1.23 | -2.20 | -0.65 | -0.65 | -0.27 | -1.03 | -0.86 | -1.39 | -2.72 | -2.15 | -1.47 |
| 9.22  | -0.09 | -1.42 | 0.04  | -2.05 | -0.65 | -1.92 | -1.70 | -1.36 | -1.47 | -2.29 | -2.02 |
| 9.42  | -2.42 | 0.48  | -0.87 | 0.43  | -1.89 | -0.77 | -1.11 | -1.50 | -1.55 | -2.38 | -2.33 |
| 9.62  | 1.16  | -1.05 | -0.69 | -0.51 | -1.51 | 0.02  | -1.68 | -0.52 | -3.05 | -1.80 | -1.65 |
| 9.82  | -0.71 | -1.40 | -1.19 | -0.47 | -1.29 | -1.96 | -0.21 | -1.99 | -2.66 | -0.88 | -2.67 |
| 10.02 | 0.58  | 0.02  | -1.16 | -2.56 | -0.70 | -1.86 | -1.63 | -0.84 | -0.96 | -2.90 | -1.41 |

|       |       |       |       |       |       |       |       |       |       |       |       |
|-------|-------|-------|-------|-------|-------|-------|-------|-------|-------|-------|-------|
| 10.22 | -2.01 | -0.02 | -1.94 | -1.32 | -1.98 | -1.17 | -2.31 | -0.99 | -0.80 | -1.61 | -3.06 |
| 10.42 | 0.07  | -0.19 | -1.07 | -1.68 | -1.73 | -1.12 | -0.61 | -0.59 | -1.91 | -1.77 | -2.61 |
| 10.62 | -1.14 | -0.93 | -0.49 | -2.15 | 0.25  | -0.64 | -1.13 | -0.76 | -1.62 | -1.87 | -1.90 |
| 10.82 | -1.97 | -0.50 | -1.24 | 0.04  | -1.37 | -1.75 | -1.48 | -0.34 | -2.31 | -1.42 | -2.70 |
| 11.02 | -0.31 | -2.13 | -1.94 | -0.80 | 0.53  | -0.28 | -0.24 | -3.06 | -2.64 | -3.35 | -2.08 |
| 11.22 | -0.48 | -2.14 | -0.20 | -2.18 | -1.57 | -1.38 | -0.71 | -2.05 | -2.07 | -2.29 | -2.05 |
| 11.42 | -2.01 | -1.21 | -0.52 | -1.56 | -0.86 | -0.91 | -0.71 | -1.28 | -1.09 | -1.40 | -2.05 |
| 11.62 | -2.67 | -1.00 | -1.31 | -1.76 | -1.81 | -1.54 | -1.20 | -0.18 | -3.11 | -3.07 | -1.60 |
| 11.82 | -0.79 | -0.31 | -1.35 | -2.28 | -0.55 | -1.43 | -1.62 | -2.28 | -1.70 | -1.58 | -1.52 |
| 12.02 | -0.51 | -0.34 | 0.02  | -0.77 | -1.08 | -0.53 | -2.68 | -0.73 | -1.94 | -1.20 | -1.56 |
| 12.22 | 0.68  | -0.28 | -1.33 | -2.14 | -1.52 | -2.51 | -1.91 | -0.63 | -1.91 | -2.67 | -1.54 |
| 12.42 | -1.27 | -1.44 | 0.18  | -1.18 | -0.58 | -1.29 | -2.12 | -0.70 | -1.79 | -1.10 | -2.27 |
| 12.62 | -0.94 | -0.15 | -1.35 | -1.07 | -0.41 | -0.66 | -1.55 | -2.44 | -1.11 | -2.10 | -1.57 |
| 12.82 | -0.91 | -0.97 | -1.26 | -2.09 | -1.73 | 0.64  | -1.61 | -0.83 | -2.03 | -1.04 | -2.28 |
| 13.02 | -1.40 | -1.25 | -1.93 | -0.60 | -0.57 | -2.05 | 0.62  | -1.76 | -1.62 | -1.09 | -0.84 |
| 13.22 | -0.90 | 0.42  | -0.98 | -1.17 | -2.04 | -0.95 | -1.80 | -0.63 | -2.42 | -3.10 | -1.56 |
| 13.42 | -1.21 | -2.23 | 1.41  | -1.84 | -0.22 | -1.08 | -2.45 | -0.81 | -1.96 | -3.07 | -1.62 |
| 13.50 | -0.88 | -0.32 | -0.99 | -1.90 | -1.19 | -2.08 | -1.15 | -2.22 | -1.64 | -1.72 | -1.71 |
| 13.59 | -0.71 | 0.09  | -0.20 | -1.37 | 0.11  | -1.72 | -1.05 | -0.78 | -1.61 | -1.39 | -1.99 |
| 13.68 | -2.05 | -1.57 | -1.63 | -1.88 | -1.82 | -1.36 | -1.61 | -1.80 | -2.15 | -1.09 | -1.64 |
| 13.78 | -0.63 | -0.94 | -1.18 | -2.97 | -0.99 | -1.52 | -1.58 | -1.02 | -1.45 | -1.98 | -2.37 |
| 13.88 | -0.57 | -0.44 | -0.84 | -1.82 | -1.24 | -0.76 | -2.46 | -2.97 | -0.50 | -2.00 | -0.95 |
| 14.00 | -1.92 | -0.25 | -0.98 | -3.40 | -0.84 | -1.52 | -1.24 | -2.05 | -1.96 | -2.36 | -0.96 |
| 14.12 | -0.70 | -1.28 | -0.55 | -2.13 | -0.79 | -1.61 | -1.24 | -0.61 | -1.86 | -2.35 | -1.93 |
| 14.25 | -0.44 | -1.22 | -0.96 | -2.57 | -1.30 | -1.11 | -0.22 | -1.36 | -1.20 | -1.74 | -1.91 |
| 14.40 | -0.47 | -0.32 | 0.74  | -0.86 | -0.71 | -0.87 | -1.05 | -2.47 | -2.18 | -2.07 | -2.22 |
| 14.55 | -3.25 | -2.08 | -0.94 | -0.98 | -0.93 | -1.39 | -1.97 | -1.11 | -1.80 | -0.95 | -1.99 |
| 14.72 | -0.01 | -1.34 | -0.90 | -2.57 | -0.68 | -2.40 | -2.24 | -1.70 | -2.50 | -2.29 | -2.07 |
| 14.90 | -0.47 | 0.54  | -1.77 | -0.63 | -1.39 | -2.99 | -0.59 | -1.85 | -1.97 | -1.58 | -2.15 |
| 15.09 | 0.06  | -1.67 | -0.40 | -1.34 | -0.84 | -0.15 | -2.14 | -0.80 | -2.02 | -3.16 | -2.04 |
| 15.30 | -0.39 | -2.19 | -1.37 | -0.52 | -0.59 | -2.31 | -1.59 | -1.71 | -2.11 | -2.42 | -2.00 |
| 15.53 | -1.16 | -0.85 | 0.47  | -1.56 | -1.44 | -2.33 | -1.25 | -1.06 | -2.68 | -1.74 | -1.91 |
| 15.77 | 0.55  | -0.73 | -3.45 | -1.73 | 0.08  | -1.48 | -2.03 | -0.94 | -2.17 | -2.61 | -3.14 |
| 16.04 | -0.43 | -1.76 | -0.13 | -2.70 | -0.19 | -0.91 | -2.18 | -1.42 | -1.15 | -2.10 | -1.96 |
| 16.32 | -1.16 | -1.03 | 0.08  | -1.96 | -0.72 | -2.42 | -1.56 | -0.72 | -0.96 | -2.72 | -1.62 |
| 16.63 | -1.57 | -0.49 | -0.94 | -2.60 | -1.75 | -0.96 | -0.45 | -2.15 | -2.63 | -1.61 | -3.02 |
| 16.96 | 0.02  | -2.82 | -2.47 | -2.54 | -0.45 | -3.05 | -2.11 | -0.41 | -3.13 | -3.24 | -1.60 |
| 17.31 | -1.05 | 0.82  | -2.91 | -2.42 | 0.09  | -1.42 | -2.08 | -1.91 | -0.06 | -2.48 | -1.81 |
| 17.70 | -0.92 | -1.14 | 0.46  | -2.31 | -2.23 | -1.46 | 0.18  | -2.38 | -2.98 | -1.76 | -2.13 |
| 18.11 | -1.04 | 0.05  | -2.02 | -3.03 | 0.32  | -2.97 | -2.43 | -0.16 | -2.62 | -2.69 | -2.30 |
| 18.56 | -2.47 | 0.76  | 0.18  | -2.24 | -1.21 | -0.54 | -0.79 | -1.01 | -1.77 | -1.31 | -2.73 |
| 19.04 | -0.25 | 1.10  | -0.32 | -1.24 | -0.06 | -1.65 | -1.53 | -1.76 | -1.86 | -2.16 | -0.95 |
| 19.56 | 0.24  | -1.01 | -2.02 | -0.98 | -2.13 | -1.32 | -1.02 | -1.11 | -2.75 | -1.58 | -1.35 |
| 20.12 | -0.70 | -0.93 | -1.57 | -0.02 | -0.05 | -1.64 | -1.39 | -2.65 | -1.98 | -2.16 | -3.51 |
| 20.72 | -0.40 | -0.67 | 0.07  | -1.20 | -1.53 | -2.64 | -3.18 | -1.98 | -1.17 | -2.27 | -2.03 |
| 21.37 | -1.65 | -0.39 | -0.75 | -1.22 | -2.51 | -2.28 | -2.38 | -1.82 | -2.54 | -1.24 | -3.06 |
| 22.08 | -0.95 | -1.98 | -0.09 | -0.55 | -1.87 | -2.15 | -1.35 | -1.58 | -2.48 | -1.96 | -0.46 |
| 22.84 | -1.33 | -1.73 | -0.30 | -0.26 | -1.43 | -0.74 | -0.27 | -1.05 | -2.07 | -2.19 | -1.94 |
| 23.65 | 0.79  | -0.31 | -1.29 | -1.36 | -1.33 | -0.25 | -0.30 | -1.32 | -2.10 | -2.22 | -1.76 |
| 24.54 | 1.09  | -1.30 | -2.51 | -1.37 | -1.08 | -0.70 | -0.63 | -2.08 | -1.85 | -2.13 | -2.29 |



|        |       |       |       |       |       |       |       |       |       |       |       |
|--------|-------|-------|-------|-------|-------|-------|-------|-------|-------|-------|-------|
| 25.49  | -1.99 | -0.23 | -1.07 | -1.18 | -1.04 | -1.36 | -2.26 | -1.54 | -1.99 | -1.14 | -2.31 |
| 26.51  | -1.27 | -1.29 | -0.79 | -1.44 | -1.44 | -1.41 | -2.25 | -1.46 | -1.80 | -2.34 | -2.43 |
| 27.62  | -1.51 | -0.50 | -2.15 | -1.30 | -2.31 | -1.97 | -2.64 | -1.17 | -2.19 | -2.76 | -1.22 |
| 28.81  | 0.69  | -0.95 | 0.70  | -0.46 | -1.64 | -0.76 | -1.65 | -1.65 | -2.40 | -2.21 | -3.11 |
| 30.10  | -1.64 | 0.49  | -2.24 | -0.05 | -1.59 | -1.44 | -1.52 | -1.67 | -2.29 | -2.84 | -2.51 |
| 31.49  | -0.64 | -1.25 | 0.30  | -1.77 | -0.59 | -1.66 | -1.73 | -1.07 | -3.06 | -2.05 | -1.14 |
| 32.98  | -0.76 | -1.33 | -1.14 | -0.58 | -1.00 | -2.31 | -2.36 | -1.25 | -1.55 | -2.05 | -2.39 |
| 34.60  | -1.66 | 0.07  | 0.04  | -2.77 | -0.06 | -1.16 | -2.06 | -1.18 | -1.63 | -2.01 | -1.69 |
| 36.34  | -0.40 | -0.89 | -1.06 | -1.18 | -0.63 | -1.89 | -2.37 | -1.27 | -2.74 | -2.53 | -2.87 |
| 38.21  | -1.66 | 0.09  | -0.59 | -0.43 | -2.44 | -1.47 | -2.52 | -2.35 | -2.52 | -1.47 | -2.37 |
| 40.24  | -1.87 | -1.21 | -1.16 | -1.79 | -1.58 | -1.67 | -1.94 | -2.04 | -0.90 | -1.84 | -1.07 |
| 42.42  | -1.98 | 1.37  | 0.44  | -1.68 | -0.68 | -0.99 | -1.53 | -1.75 | -2.75 | -0.93 | -2.04 |
| 44.78  | -1.07 | -0.82 | -0.23 | -1.49 | -0.67 | -1.04 | -1.21 | -1.85 | -1.43 | -1.42 | -0.88 |
| 47.32  | -1.82 | -1.11 | -0.45 | -1.49 | -1.16 | -1.85 | -1.90 | -1.15 | -1.75 | -1.88 | -2.34 |
| 50.06  | -0.65 | -1.28 | -2.56 | 0.38  | -1.01 | -0.90 | -1.64 | -0.01 | -2.13 | -0.86 | -2.58 |
| 53.01  | -0.61 | 0.98  | -0.41 | -0.32 | -1.31 | -2.03 | -1.40 | -0.56 | -2.11 | -1.82 | -1.33 |
| 56.20  | -0.33 | -1.14 | 0.01  | -1.05 | -2.24 | -2.50 | -1.49 | -1.75 | -2.47 | -1.75 | -2.68 |
| 59.64  | -0.13 | -0.98 | -1.24 | -0.69 | -1.38 | -1.52 | -2.64 | -2.21 | -2.22 | -1.52 | -2.11 |
| 63.34  | -0.48 | -0.33 | -1.74 | -2.77 | -0.30 | -0.41 | -0.30 | -2.35 | -2.39 | -2.12 | -2.04 |
| 67.34  | 0.23  | -0.81 | -0.55 | -1.58 | -1.00 | -2.74 | -2.35 | -1.63 | -1.53 | -2.41 | -1.92 |
| 71.65  | -1.96 | -0.98 | -0.89 | -0.41 | -2.11 | 0.27  | -0.67 | -0.99 | -1.37 | -1.89 | -3.07 |
| 76.30  | 0.40  | -0.46 | -0.27 | -0.77 | -1.51 | -1.92 | -0.92 | -1.72 | -1.83 | -1.57 | -1.27 |
| 81.32  | -1.36 | -0.47 | -1.41 | -2.37 | -0.76 | -2.13 | -1.45 | -1.59 | -1.90 | -1.92 | -2.50 |
| 86.73  | -1.71 | -0.77 | 0.38  | -1.94 | -0.27 | -2.37 | -1.28 | -2.06 | -2.11 | -2.98 | -2.63 |
| 92.56  | -2.12 | 0.05  | -0.29 | -1.81 | -0.96 | -0.88 | -1.57 | -0.69 | -1.83 | -1.82 | -2.35 |
| 98.85  | -0.51 | 0.35  | -1.07 | -2.00 | -1.58 | -1.81 | -2.10 | -1.20 | -2.70 | -1.81 | -2.06 |
| 105.64 | 0.34  | 0.03  | -0.11 | -1.03 | 0.23  | -0.94 | -1.25 | -1.39 | -2.08 | -1.30 | -1.92 |
| 112.96 | -0.30 | -0.84 | -0.96 | -2.13 | -0.66 | -1.39 | -0.94 | -2.06 | -2.03 | -2.07 | -2.51 |
| 120.85 | -0.13 | 0.64  | 0.25  | -0.59 | -1.23 | -0.90 | -1.25 | -0.90 | -1.40 | -1.07 | -1.68 |
| 129.36 | -0.78 | 0.00  | -0.13 | -1.53 | -1.52 | -2.00 | -1.57 | -0.35 | -3.08 | -2.93 | -1.71 |
| 138.55 | -1.09 | -0.52 | -2.07 | -1.71 | -0.61 | -1.32 | -1.96 | -2.56 | -2.43 | -1.47 | -2.19 |
| 148.45 | 0.32  | -1.55 | -1.59 | -1.34 | -0.71 | -1.53 | -2.11 | -1.15 | -2.47 | -2.27 | -1.73 |
| 159.13 | -1.14 | -1.31 | -2.14 | 0.03  | -1.04 | -2.15 | -0.41 | -2.06 | -1.70 | -0.79 | -1.29 |
| 170.65 | -1.37 | 0.38  | -1.89 | -1.58 | -0.55 | -2.58 | -1.64 | -2.89 | -3.21 | -1.40 | -2.32 |
| 183.07 | -0.83 | -2.68 | 0.81  | -2.21 | -0.59 | -2.39 | -1.75 | -1.83 | -2.08 | -2.81 | -2.10 |
| 196.47 | -0.34 | -0.12 | -0.62 | -0.95 | -1.87 | -1.35 | -3.23 | -2.70 | -2.70 | -2.46 | -2.11 |
| 210.91 | -1.49 | -1.14 | -1.32 | -0.32 | -1.50 | -1.25 | -1.12 | -2.18 | -2.31 | -2.59 | -1.70 |
| 226.50 | -1.58 | -0.38 | -1.16 | -1.76 | -1.17 | -1.26 | -2.11 | -2.28 | -2.86 | -1.84 | -1.68 |
| 243.31 | -0.14 | -0.43 | 0.21  | -0.99 | -1.13 | -1.26 | -2.21 | -2.89 | -2.86 | -0.75 | -2.07 |
| 261.43 | -0.69 | -1.28 | -1.11 | -0.08 | -2.02 | -2.59 | -2.21 | -2.09 | -1.32 | -2.54 | -1.94 |
| 280.98 | -0.78 | -0.40 | -0.55 | -0.78 | -1.54 | -2.71 | -2.22 | -1.12 | -2.10 | -2.15 | -3.90 |
| 302.07 | -2.10 | 0.18  | -0.50 | -3.27 | -0.02 | -2.80 | -1.52 | -1.19 | -1.76 | -1.71 | -2.80 |
| 324.81 | -0.90 | -2.19 | -0.46 | -2.28 | -1.34 | -1.07 | -1.96 | -0.98 | -1.81 | -3.08 | -2.85 |
| 349.33 | -0.16 | 0.44  | -1.97 | -1.38 | -1.04 | -0.06 | -0.86 | -1.26 | -1.78 | -1.83 | -1.90 |
| 375.79 | -2.28 | -0.53 | -0.03 | -3.06 | -1.74 | -2.28 | -1.08 | -3.46 | -2.23 | -2.59 | -1.47 |
| 404.31 | -1.66 | 0.19  | -0.50 | 0.46  | -1.59 | -1.69 | -2.01 | -1.60 | -3.24 | -1.79 | -2.38 |
| 435.08 | -0.27 | 0.27  | -1.83 | -1.95 | -2.61 | -1.44 | -2.62 | -1.78 | -4.21 | -2.61 | -2.56 |
| 468.27 | 0.40  | -0.83 | -0.79 | -0.84 | -0.25 | -0.27 | -1.19 | -1.60 | -1.88 | -1.74 | -2.06 |
| 504.06 | -0.57 | -1.69 | -1.36 | -0.96 | -1.01 | -1.24 | -1.00 | -2.65 | -2.37 | -1.88 | -1.53 |
| 542.66 | 0.23  | -1.23 | -2.03 | -1.42 | -2.07 | -1.42 | -2.02 | -2.18 | -2.61 | -2.59 | -2.66 |

|         |       |       |       |       |       |       |       |       |       |       |       |
|---------|-------|-------|-------|-------|-------|-------|-------|-------|-------|-------|-------|
| 584.29  | -1.56 | -1.11 | -0.22 | -1.60 | -0.73 | -1.74 | -1.28 | -2.38 | -2.67 | -1.88 | -1.54 |
| 629.18  | 0.32  | -0.80 | 0.69  | -0.54 | -0.43 | -1.68 | -2.52 | -1.54 | -2.30 | -2.01 | -2.03 |
| 677.61  | 0.23  | -1.20 | -1.55 | -1.77 | -1.56 | -1.63 | -0.56 | -2.20 | -2.36 | -1.86 | -3.23 |
| 729.83  | -1.39 | -0.08 | -0.51 | -0.99 | -1.02 | -0.90 | -1.21 | -1.80 | -1.13 | -2.12 | -1.36 |
| 786.16  | 0.80  | -0.08 | -1.05 | -2.38 | -1.55 | -1.23 | -1.57 | -3.11 | -1.48 | -2.42 | -1.97 |
| 846.90  | -1.50 | -1.47 | -1.12 | -1.90 | -2.54 | -1.45 | -1.59 | -0.96 | -3.02 | -1.84 | -2.18 |
| 912.42  | 0.42  | -0.50 | 0.53  | -1.92 | -0.99 | -1.80 | -1.38 | -2.21 | -1.76 | -1.34 | -1.55 |
| 983.08  | -1.59 | 0.17  | -0.24 | -1.43 | -1.20 | -1.54 | -0.98 | -1.70 | -1.94 | -1.79 | -1.40 |
| 1059.29 | -2.18 | -2.56 | -0.43 | -1.90 | -0.57 | -3.33 | -2.53 | -1.18 | -2.67 | -2.02 | -2.52 |
| 1141.48 | -0.93 | -1.25 | -0.67 | -1.25 | -1.87 | -1.37 | -1.67 | -1.62 | -2.87 | -2.32 | -2.35 |
| 1230.13 | -3.03 | -1.90 | -2.19 | -1.73 | -0.73 | -1.22 | -2.47 | -2.51 | -2.43 | -1.94 | -1.37 |
| 1325.73 | -0.80 | 0.01  | -1.84 | -1.85 | -0.65 | -1.41 | -0.16 | -1.59 | -1.79 | -1.66 | -1.22 |
| 1428.84 | -0.24 | -1.63 | -1.13 | -1.91 | -1.52 | -1.30 | -0.80 | -1.96 | -1.84 | -2.49 | -2.10 |
| 1540.05 | -0.55 | -2.20 | -0.68 | -1.05 | -0.98 | -3.15 | -2.75 | -1.49 | -2.38 | -2.16 | -2.23 |
| 1659.99 | -1.73 | -0.90 | 0.43  | -0.30 | -1.46 | -2.09 | -1.70 | -1.32 | -2.26 | -1.24 | -1.82 |
| 1789.34 | -1.52 | 0.12  | -1.14 | -1.25 | -1.41 | -0.79 | -1.01 | -2.13 | -3.58 | -1.52 | -1.72 |
| 1928.85 | -1.04 | -0.03 | -1.27 | -2.47 | -1.27 | -0.82 | -0.15 | -1.95 | -2.83 | -1.99 | -1.90 |
| 2079.31 | -0.90 | -0.70 | -1.29 | -1.48 | -1.32 | -1.88 | -2.38 | -2.43 | -2.45 | -1.48 | -2.12 |
| 2241.59 | -3.27 | -0.17 | -1.88 | -0.65 | -1.22 | -0.65 | -3.75 | -2.97 | -2.53 | -1.23 | -1.81 |
| 2416.60 | -0.52 | -1.50 | -0.15 | -2.00 | -1.46 | -1.96 | -1.99 | -2.80 | -1.99 | -1.81 | -1.92 |
| 2605.36 | -0.01 | 0.09  | -1.79 | -1.83 | -1.36 | -2.03 | -0.93 | -0.48 | -2.45 | -2.40 | -2.34 |
| 2808.94 | -0.24 | -0.43 | -0.81 | -1.68 | -2.65 | -3.03 | -1.94 | -2.31 | -1.90 | -2.14 | -1.94 |
| 3028.50 | -0.70 | -1.24 | -0.16 | -1.61 | -1.46 | -1.20 | -1.70 | -0.44 | -2.16 | -1.95 | -1.91 |
| 3265.30 | -1.88 | -1.19 | -0.55 | -1.73 | -1.51 | -2.84 | -1.66 | -1.09 | -3.17 | -2.88 | -1.63 |
| 3520.69 | -1.25 | -0.16 | -1.00 | 0.24  | -1.61 | -2.37 | -1.81 | -2.09 | -1.79 | -2.53 | -1.89 |
| 3796.13 | 0.55  | -1.23 | -0.84 | -1.46 | 0.54  | -1.90 | -2.13 | -1.35 | -2.66 | -0.82 | -1.60 |

| Wavelength (nm) / Time (ps) | 334.09 | 335.51 | 336.94 | 338.36 | 339.79 | 341.21 | 342.63 | 344.06 | 345.48 | 346.91 | 348.33 |
|-----------------------------|--------|--------|--------|--------|--------|--------|--------|--------|--------|--------|--------|
| -3.78                       | 0.13   | 0.19   | -0.71  | -0.15  | 0.00   | -0.28  | 0.13   | 0.01   | 0.00   | -0.25  | -0.09  |
| -3.28                       | 0.29   | 0.84   | 0.98   | 0.42   | 0.16   | 0.25   | 0.36   | 0.26   | 0.40   | 0.35   | 0.04   |
| -2.78                       | -0.49  | -0.03  | 0.15   | -0.21  | 0.42   | 0.20   | 0.17   | 0.49   | 0.04   | 0.22   | 0.20   |
| -2.28                       | 0.18   | -0.18  | 0.09   | -0.04  | -0.03  | -0.09  | 0.13   | 0.39   | 0.10   | 0.04   | 0.27   |
| -1.78                       | 0.16   | 0.05   | -0.39  | 0.55   | -0.31  | 0.23   | 0.41   | 0.01   | -0.10  | 0.09   | 0.06   |
| -1.28                       | 0.36   | -0.18  | -0.30  | -0.05  | -0.10  | 0.15   | -0.23  | -0.10  | -0.15  | -0.12  | 0.04   |
| -0.78                       | -0.03  | -0.37  | 0.19   | -0.53  | -0.33  | -0.31  | -0.59  | -0.63  | -0.17  | -0.04  | -0.50  |
| -0.28                       | -0.60  | -0.32  | -0.01  | 0.00   | 0.18   | -0.16  | -0.39  | -0.44  | -0.12  | -0.29  | -0.03  |
| -0.18                       | -0.15  | 0.13   | 0.02   | 0.43   | -0.14  | 0.14   | 0.73   | 0.24   | 0.08   | -0.46  | -0.20  |
| -0.08                       | -0.95  | 0.64   | 0.01   | 0.33   | 0.86   | 0.03   | 0.30   | -0.09  | -0.07  | -0.19  | -0.07  |
| 0.02                        | -0.04  | 0.89   | 0.45   | -0.16  | -0.06  | 0.19   | -0.18  | -0.23  | 0.13   | -0.17  | -0.09  |
| 0.12                        | 0.70   | -0.25  | -0.24  | 0.17   | -0.25  | 0.13   | 0.26   | 0.08   | 0.17   | -0.04  | 0.36   |
| 0.22                        | 0.38   | 0.00   | -0.22  | -0.98  | -0.26  | -0.29  | -0.15  | -0.37  | -0.12  | -0.49  | 0.08   |
| 0.27                        | 0.32   | 0.18   | -0.44  | 0.05   | -0.76  | -0.01  | -0.08  | -0.20  | 0.10   | -0.12  | 0.02   |
| 0.32                        | -0.22  | 0.60   | 0.26   | 0.17   | 0.22   | -0.05  | -0.07  | -0.61  | 0.47   | 0.11   | 0.28   |
| 0.37                        | -8.11  | -5.50  | -1.57  | -0.54  | -0.05  | -0.03  | -0.07  | 0.11   | 0.00   | 0.29   | -0.11  |
| 0.42                        | 7.32   | -7.77  | -15.76 | -13.25 | -6.96  | -3.25  | -1.67  | -0.55  | 0.09   | 0.07   | 0.37   |
| 0.47                        | 40.27  | 47.04  | 39.25  | 23.02  | 7.50   | -5.43  | -15.27 | -17.56 | -13.06 | -5.85  | -1.74  |
| 0.52                        | -20.78 | -1.52  | 20.89  | 41.93  | 57.50  | 66.38  | 60.70  | 39.92  | 11.96  | -10.11 | -20.11 |

|      |        |        |        |        |        |        |        |        |        |        |        |
|------|--------|--------|--------|--------|--------|--------|--------|--------|--------|--------|--------|
| 0.57 | -13.31 | -21.52 | -31.05 | -36.65 | -31.71 | -12.58 | 19.08  | 52.55  | 76.53  | 83.91  | 76.21  |
| 0.62 | 1.93   | 0.09   | -2.91  | -8.85  | -15.91 | -24.75 | -35.64 | -41.23 | -32.69 | -12.04 | 17.60  |
| 0.67 | -0.42  | -0.42  | 0.17   | 0.76   | 2.51   | 2.71   | -0.59  | -4.99  | -10.74 | -19.76 | -33.42 |
| 0.72 | 0.33   | -0.10  | 0.33   | 0.88   | 0.37   | -0.04  | 1.36   | 1.99   | 3.94   | 4.38   | 3.04   |
| 0.77 | -0.67  | -0.02  | -0.33  | 0.11   | 0.24   | 0.64   | 1.24   | 1.68   | 2.20   | 2.13   | 1.75   |
| 0.82 | -0.02  | -0.17  | -0.08  | -0.32  | 0.08   | 0.78   | 1.36   | 1.46   | 1.73   | 2.37   | 2.39   |
| 0.87 | -0.87  | -0.01  | -0.60  | -0.56  | -0.46  | 0.42   | 0.57   | 0.30   | 1.38   | 1.36   | 2.57   |
| 0.92 | -0.49  | -0.26  | -0.55  | 0.27   | -0.74  | -0.09  | 0.67   | 0.75   | 0.83   | 1.41   | 1.97   |
| 0.97 | -0.72  | -0.66  | -0.25  | -0.70  | -0.40  | 0.03   | 0.53   | 1.26   | 1.27   | 1.54   | 1.51   |
| 1.02 | -0.31  | -1.40  | 0.31   | -0.45  | -0.69  | 0.07   | 0.10   | 0.23   | 0.90   | 1.18   | 1.50   |
| 1.07 | -1.01  | -0.68  | -0.13  | -1.51  | -0.13  | 0.05   | 0.48   | 0.81   | 1.12   | 0.79   | 1.77   |
| 1.12 | -0.94  | -0.86  | -0.65  | -1.30  | -0.78  | -0.12  | 0.22   | 0.51   | 0.02   | 1.26   | 1.51   |
| 1.17 | -0.60  | -1.56  | -0.63  | -0.78  | -1.49  | -0.58  | -0.29  | 0.39   | 0.54   | 0.70   | 1.21   |
| 1.22 | -1.96  | -1.39  | -0.37  | -1.35  | -1.07  | -0.35  | 0.12   | 0.06   | 0.49   | 0.64   | 1.18   |
| 1.27 | -0.53  | -0.45  | -0.84  | 0.00   | -0.44  | 0.14   | 0.35   | 0.39   | 0.31   | 0.90   | 0.83   |
| 1.32 | -0.87  | -1.27  | -1.05  | -1.36  | -0.88  | -1.14  | -0.06  | -0.39  | 0.34   | 0.68   | 0.69   |
| 1.37 | -0.82  | -0.91  | -0.90  | -0.67  | -1.45  | -0.27  | 0.20   | -0.01  | 0.56   | 0.66   | 0.98   |
| 1.42 | -1.94  | -1.01  | -0.80  | -0.97  | -1.72  | -0.35  | -0.15  | -0.50  | 0.16   | 0.79   | 0.98   |
| 1.47 | -1.47  | -0.25  | -1.30  | -1.02  | -0.82  | -0.33  | -0.22  | 0.12   | 0.46   | 0.89   | 1.28   |
| 1.52 | -2.19  | -0.76  | -1.03  | -1.61  | -0.87  | -0.63  | -0.35  | -0.18  | 0.12   | 0.42   | 0.80   |
| 1.57 | -1.57  | -0.96  | -0.44  | -1.04  | -1.13  | -0.30  | -0.28  | -0.37  | 0.30   | 0.71   | 0.73   |
| 1.62 | -0.98  | -0.74  | -0.89  | -0.65  | -0.52  | -0.64  | 0.08   | 0.04   | 0.30   | 0.68   | 0.94   |
| 1.67 | -1.89  | -1.80  | -1.08  | -0.78  | -1.17  | -0.65  | -0.12  | -0.29  | 0.26   | 0.79   | 0.76   |
| 1.72 | -0.32  | -1.35  | -0.60  | -1.01  | -0.35  | -0.05  | -0.04  | -0.03  | 0.56   | 0.68   | 0.97   |
| 1.77 | -0.62  | -0.40  | -0.74  | -1.39  | -1.12  | -0.65  | 0.30   | 0.17   | 0.26   | 0.43   | 0.79   |
| 1.82 | -1.06  | -1.22  | -1.06  | -1.84  | -1.01  | -0.84  | 0.10   | -0.43  | 0.00   | 0.44   | 0.68   |
| 1.87 | -1.50  | -0.66  | -0.78  | -1.90  | -1.50  | -0.33  | 0.00   | -0.07  | 0.14   | 0.71   | 0.88   |
| 1.92 | -1.33  | -0.82  | -0.52  | -0.96  | -0.57  | -0.36  | -0.44  | 0.39   | 0.44   | 0.61   | 1.08   |
| 1.97 | -0.76  | -0.91  | -0.95  | -0.69  | -0.94  | -0.16  | -0.12  | -0.02  | 0.70   | 0.75   | 1.20   |
| 2.02 | -1.35  | -1.49  | -0.97  | -1.17  | -0.62  | -0.04  | -0.39  | -0.19  | 0.29   | 0.59   | 1.23   |
| 2.07 | -0.97  | -1.25  | -0.76  | -0.89  | -1.44  | -0.26  | -0.21  | 0.02   | 0.46   | 0.66   | 1.13   |
| 2.12 | -1.38  | -0.82  | -0.74  | -1.31  | -1.58  | -0.74  | -0.53  | -0.44  | 0.50   | 0.53   | 0.76   |
| 2.17 | -1.72  | -0.54  | -0.42  | -1.57  | -1.68  | -0.52  | -0.36  | -0.56  | -0.01  | 0.61   | 1.17   |
| 2.22 | -1.87  | -0.86  | -0.91  | -0.86  | -1.16  | -0.44  | -0.25  | -0.17  | 0.35   | 0.96   | 1.06   |
| 2.27 | -1.75  | -1.72  | -0.63  | -1.50  | -1.42  | -0.57  | -0.09  | -0.29  | 0.08   | 0.43   | 1.20   |
| 2.32 | -1.54  | -2.11  | -1.79  | -0.52  | -1.34  | -0.84  | -0.50  | -0.93  | -0.22  | 0.38   | 0.79   |
| 2.37 | -0.82  | -1.37  | -1.04  | -1.68  | -0.98  | -0.47  | -0.12  | -0.06  | -0.04  | 0.83   | 1.00   |
| 2.42 | -1.42  | -1.34  | -1.54  | -1.06  | -0.78  | -0.28  | -0.58  | 0.13   | 0.16   | 0.09   | 0.42   |
| 2.47 | -1.59  | -0.67  | -1.57  | -1.11  | -0.94  | -0.76  | -0.06  | -0.15  | 0.15   | 0.32   | 0.76   |
| 2.52 | -1.61  | -1.05  | -1.93  | -1.07  | -1.36  | -0.81  | -0.25  | -0.45  | 0.14   | 0.32   | 0.77   |
| 2.57 | -1.72  | -1.63  | -1.64  | -1.38  | -0.39  | -0.77  | -0.23  | -0.24  | 0.28   | 0.71   | 0.90   |
| 2.62 | -2.24  | -1.82  | -1.84  | -1.74  | -1.19  | -0.80  | -0.61  | -0.28  | -0.17  | 0.58   | 1.00   |
| 2.67 | -2.30  | -1.57  | -0.70  | -1.69  | -0.79  | -0.64  | 0.42   | -0.14  | 0.54   | 0.92   | 0.63   |
| 2.72 | -1.81  | -1.71  | -1.43  | -0.72  | -0.69  | -0.44  | 0.25   | -0.02  | 0.36   | 0.39   | 1.02   |
| 2.77 | -1.41  | -0.99  | -1.69  | -0.97  | -1.27  | -0.82  | -0.36  | -0.08  | 0.07   | 0.55   | 1.14   |
| 2.82 | -0.96  | -1.96  | -1.03  | -1.88  | -0.75  | 0.19   | 0.09   | -0.64  | -0.35  | 0.45   | 0.88   |
| 2.87 | -1.17  | -1.15  | -1.10  | -1.28  | -1.24  | -1.01  | -0.51  | 0.17   | 0.12   | 0.40   | 0.55   |
| 2.92 | -1.53  | -1.40  | -0.88  | -0.89  | -1.91  | -0.47  | -0.22  | -0.72  | 0.29   | 0.27   | 0.86   |
| 2.97 | -1.39  | -1.34  | -0.55  | -1.78  | -1.03  | -0.59  | -0.45  | 0.18   | 0.21   | 0.58   | 0.61   |
| 3.02 | -0.96  | -1.43  | -1.32  | -1.24  | -0.61  | -0.76  | -0.01  | 0.02   | 0.13   | 0.76   | 0.88   |

|       |       |       |       |       |       |       |       |       |       |       |       |
|-------|-------|-------|-------|-------|-------|-------|-------|-------|-------|-------|-------|
| 3.07  | -1.90 | -1.32 | -1.03 | -1.91 | -1.79 | -0.63 | -0.53 | 0.03  | -0.08 | 0.58  | 0.95  |
| 3.12  | -1.89 | -1.26 | -1.17 | -0.64 | -1.54 | -1.22 | -0.09 | -0.18 | 0.27  | 0.35  | 0.67  |
| 3.17  | -0.47 | -1.15 | -0.60 | -1.56 | -1.41 | 0.10  | -0.21 | -0.13 | 0.16  | 0.88  | 0.63  |
| 3.22  | -2.11 | -0.93 | -1.28 | -0.94 | -1.69 | -1.02 | -0.19 | -0.04 | 0.28  | 0.66  | 0.84  |
| 3.42  | -1.22 | -1.67 | -1.48 | -2.10 | -1.55 | -1.06 | -0.45 | -0.02 | -0.65 | -0.36 | 0.99  |
| 3.62  | -2.42 | -1.54 | -0.54 | -1.00 | -1.60 | -0.51 | -0.55 | -0.42 | 0.27  | 0.28  | 0.79  |
| 3.82  | -1.56 | -0.71 | -0.22 | -1.09 | -0.90 | -0.60 | 0.31  | 0.00  | 0.04  | -0.12 | 0.78  |
| 4.02  | -1.03 | -1.84 | -1.36 | -0.99 | -1.67 | -0.83 | -0.57 | -0.11 | 0.07  | 0.65  | 0.86  |
| 4.22  | -1.51 | -1.14 | -1.38 | -1.22 | -1.03 | -0.61 | -0.60 | -0.15 | 0.27  | 0.12  | 1.06  |
| 4.42  | -1.09 | -0.74 | -1.59 | -1.66 | -1.04 | -0.78 | -0.49 | -0.05 | 0.41  | 0.39  | 0.59  |
| 4.62  | -0.95 | -1.63 | -1.39 | -1.86 | -0.58 | -0.93 | -0.54 | -0.42 | -0.07 | 0.16  | 0.72  |
| 4.82  | -1.40 | -2.09 | -1.25 | -1.89 | -1.36 | -1.15 | -0.25 | -0.44 | -0.04 | 0.09  | 0.65  |
| 5.02  | -2.25 | -1.90 | -1.55 | -2.06 | -1.73 | -0.91 | -0.86 | -0.32 | -0.09 | 0.29  | 0.39  |
| 5.22  | -1.82 | -0.63 | -1.31 | -0.96 | -1.59 | -0.97 | -0.51 | -0.14 | 0.05  | 0.07  | 0.81  |
| 5.42  | -0.63 | -1.92 | -1.72 | -1.05 | -1.67 | -0.89 | -0.54 | -0.57 | -0.26 | 0.22  | 0.57  |
| 5.62  | -3.00 | -2.11 | -1.33 | -1.14 | -1.27 | -1.06 | -0.37 | -0.83 | -0.19 | 0.44  | 0.54  |
| 5.82  | -2.01 | -1.96 | -0.84 | -1.70 | -1.57 | -1.56 | -0.56 | -0.53 | -0.03 | 0.20  | 0.56  |
| 6.02  | -2.00 | -0.87 | -1.60 | -2.07 | -1.09 | -1.51 | -0.64 | -0.51 | -0.28 | 0.15  | 0.57  |
| 6.22  | -1.72 | -1.24 | -1.14 | -1.49 | -1.80 | -1.07 | -0.45 | -0.46 | -0.06 | -0.04 | 0.29  |
| 6.42  | -1.75 | -1.55 | -1.48 | -1.93 | -1.37 | -0.88 | -1.05 | -0.55 | -0.37 | 0.10  | 0.85  |
| 6.62  | -2.40 | -2.17 | -1.68 | -2.37 | -1.35 | -0.90 | -0.63 | -0.43 | 0.11  | 0.70  | 0.46  |
| 6.82  | -1.86 | -2.39 | -1.57 | -1.78 | -2.05 | -0.26 | -0.81 | -0.61 | -0.04 | 0.30  | 0.57  |
| 7.02  | -2.31 | -2.22 | -1.95 | -1.32 | -1.61 | -0.72 | -0.53 | -0.67 | 0.22  | 0.14  | 0.71  |
| 7.22  | -1.05 | -1.36 | -1.09 | -2.25 | -1.76 | -0.83 | -0.93 | -0.26 | 0.10  | 0.17  | 0.64  |
| 7.42  | -2.55 | -1.65 | -2.16 | -1.70 | -1.71 | -0.76 | -0.58 | -0.50 | -0.42 | -0.04 | 0.42  |
| 7.62  | -2.17 | -1.18 | -2.09 | -1.67 | -1.59 | -0.90 | -0.41 | -0.66 | -0.03 | 0.45  | 0.48  |
| 7.82  | -2.23 | -2.01 | -1.71 | -1.86 | -2.05 | -1.24 | -0.28 | -0.04 | -0.37 | 0.43  | 0.50  |
| 8.02  | -1.10 | -1.64 | -1.36 | -1.82 | -1.90 | -0.77 | -0.78 | -0.89 | -0.29 | 0.00  | 0.42  |
| 8.22  | -1.19 | -2.45 | -1.47 | -1.55 | -2.10 | -0.93 | -0.78 | -0.76 | -0.24 | -0.37 | 0.34  |
| 8.42  | -2.83 | -1.40 | -1.83 | -1.83 | -1.40 | -1.33 | -0.40 | -0.67 | -0.95 | -0.05 | 0.27  |
| 8.62  | -1.66 | -1.81 | -0.93 | -1.22 | -1.66 | -1.29 | -0.51 | -0.40 | -0.04 | -0.10 | 0.23  |
| 8.82  | -1.27 | -1.76 | -1.87 | -1.41 | -1.75 | -1.55 | -0.88 | -0.37 | -0.65 | -0.17 | 0.79  |
| 9.02  | -1.73 | -1.76 | -1.11 | -1.82 | -1.94 | -0.65 | -0.55 | -0.68 | -0.34 | -0.03 | 0.08  |
| 9.22  | -1.92 | -1.32 | -1.40 | -1.10 | -1.62 | -1.17 | -0.97 | -0.62 | -0.29 | 0.23  | 0.61  |
| 9.42  | -1.13 | -2.22 | -1.76 | -2.30 | -1.74 | -1.19 | -0.60 | -0.74 | -0.33 | -0.33 | 0.11  |
| 9.62  | -2.16 | -2.11 | -2.14 | -2.09 | -1.89 | -1.05 | -0.63 | -0.77 | -0.79 | 0.30  | 0.37  |
| 9.82  | -2.19 | -1.13 | -1.62 | -2.16 | -0.76 | -1.07 | -0.75 | -0.77 | -0.30 | 0.20  | 0.54  |
| 10.02 | -1.67 | -1.67 | -1.90 | -1.49 | -1.47 | -1.21 | -0.62 | -0.78 | -0.36 | -0.31 | 0.38  |
| 10.22 | -1.94 | -1.37 | -2.32 | -2.42 | -1.47 | -1.51 | -1.07 | -0.74 | -0.47 | -0.10 | 0.40  |
| 10.42 | -2.44 | -1.18 | -1.12 | -1.73 | -2.26 | -1.06 | -1.00 | -0.94 | -0.47 | 0.06  | 0.70  |
| 10.62 | -1.96 | -1.65 | -1.44 | -1.61 | -1.78 | -1.44 | -1.01 | -0.75 | -0.13 | -0.01 | 0.19  |
| 10.82 | -1.51 | -1.20 | -1.67 | -1.60 | -1.91 | -1.40 | -0.43 | -0.63 | -0.56 | 0.29  | 0.25  |
| 11.02 | -1.64 | -2.37 | -1.53 | -1.29 | -1.91 | -1.18 | -0.72 | -0.68 | -0.46 | -0.29 | 0.00  |
| 11.22 | -1.77 | -1.53 | -1.60 | -1.70 | -1.69 | -1.36 | -1.04 | -0.60 | -0.74 | -0.14 | -0.10 |
| 11.42 | -1.89 | -1.19 | -1.60 | -1.58 | -2.21 | -0.86 | -0.52 | -1.04 | -0.62 | -0.36 | 0.04  |
| 11.62 | -2.24 | -1.44 | -0.98 | -2.13 | -1.62 | -0.88 | -0.91 | -0.95 | -0.30 | -0.14 | 0.23  |
| 11.82 | -2.39 | -1.73 | -1.71 | -2.06 | -1.36 | -1.76 | -0.55 | -0.89 | -0.06 | 0.14  | 0.28  |
| 12.02 | -1.98 | -1.45 | -1.52 | -1.88 | -1.57 | -1.10 | -0.91 | -0.58 | -0.46 | 0.03  | 0.59  |
| 12.22 | -2.54 | -1.23 | -1.95 | -2.05 | -2.01 | -1.24 | -0.62 | -0.56 | -0.52 | 0.30  | 0.29  |
| 12.42 | -2.42 | -1.50 | -2.39 | -1.91 | -1.98 | -0.71 | -1.11 | -0.68 | -0.22 | 0.02  | 0.39  |

|       |       |       |       |       |       |       |       |       |       |       |       |
|-------|-------|-------|-------|-------|-------|-------|-------|-------|-------|-------|-------|
| 12.62 | -2.54 | -1.78 | -1.41 | -2.02 | -1.91 | -1.15 | -0.59 | -0.71 | -1.12 | 0.26  | 0.32  |
| 12.82 | -1.72 | -1.64 | -1.40 | -1.81 | -1.49 | -1.09 | -0.58 | -0.93 | -0.37 | -0.12 | 0.27  |
| 13.02 | -1.35 | -1.76 | -1.41 | -1.34 | -1.84 | -0.76 | -1.04 | -0.45 | -0.17 | 0.33  | 0.23  |
| 13.22 | -1.42 | -1.79 | -1.12 | -1.75 | -1.95 | -1.62 | -0.84 | -0.71 | -0.97 | -0.02 | 0.11  |
| 13.42 | -2.15 | -2.00 | -2.12 | -1.91 | -1.76 | -1.68 | -1.48 | -0.76 | -0.83 | -0.08 | -0.03 |
| 13.50 | -2.36 | -2.12 | -1.43 | -1.57 | -1.78 | -1.42 | -0.89 | -0.74 | -0.86 | -0.48 | 0.48  |
| 13.59 | -1.46 | -2.11 | -1.75 | -1.55 | -2.28 | -0.91 | -1.17 | -1.17 | -0.45 | 0.01  | 0.29  |
| 13.68 | -1.63 | -2.06 | -1.94 | -2.11 | -1.87 | -1.40 | -1.08 | -0.86 | -0.81 | -0.48 | 0.23  |
| 13.78 | -2.60 | -2.10 | -1.76 | -1.94 | -2.54 | -1.48 | -1.31 | -1.00 | -0.65 | -0.30 | 0.15  |
| 13.88 | -2.09 | -0.77 | -1.88 | -2.05 | -1.77 | -1.41 | -0.90 | -0.91 | -0.07 | 0.10  | 0.14  |
| 14.00 | -1.63 | -1.28 | -1.87 | -2.13 | -1.67 | -1.73 | -0.88 | -0.44 | -0.32 | 0.09  | 0.32  |
| 14.12 | -2.30 | -2.02 | -2.42 | -2.27 | -1.90 | -1.33 | -1.03 | -0.44 | -0.69 | -0.03 | 0.12  |
| 14.25 | -1.65 | -2.00 | -0.65 | -2.07 | -1.89 | -1.27 | -1.03 | -0.83 | -0.33 | 0.09  | -0.11 |
| 14.40 | -2.35 | -1.17 | -2.13 | -1.78 | -2.20 | -0.92 | -0.52 | -1.21 | -0.48 | -0.04 | 0.15  |
| 14.55 | -3.07 | -2.29 | -1.97 | -2.12 | -1.40 | -1.41 | -1.35 | -1.01 | -0.75 | -0.32 | 0.06  |
| 14.72 | -2.07 | -2.33 | -1.94 | -1.70 | -2.44 | -1.83 | -1.15 | -1.25 | -0.93 | -0.24 | -0.17 |
| 14.90 | -1.61 | -1.20 | -1.09 | -2.15 | -1.95 | -1.55 | -0.82 | -0.85 | -0.56 | 0.01  | 0.14  |
| 15.09 | -1.76 | -2.72 | -2.65 | -2.14 | -1.92 | -1.44 | -0.93 | -0.84 | -0.66 | -0.24 | 0.34  |
| 15.30 | -2.73 | -2.57 | -1.58 | -2.15 | -1.67 | -0.79 | -0.95 | -1.06 | -0.15 | -0.42 | 0.09  |
| 15.53 | -1.54 | -2.04 | -1.58 | -2.52 | -1.29 | -1.02 | -0.96 | -1.01 | -0.62 | -0.18 | 0.15  |
| 15.77 | -2.37 | -2.08 | -2.52 | -1.42 | -1.97 | -1.82 | -0.54 | -0.90 | -0.99 | -0.48 | 0.17  |
| 16.04 | -1.84 | -1.63 | -2.63 | -2.22 | -1.72 | -1.24 | -1.28 | -1.25 | -0.84 | -0.28 | 0.27  |
| 16.32 | -1.16 | -2.08 | -1.97 | -2.50 | -1.99 | -1.40 | -1.42 | -0.85 | -0.62 | 0.08  | -0.25 |
| 16.63 | -2.36 | -1.89 | -1.43 | -2.07 | -2.17 | -1.73 | -1.14 | -1.36 | -0.08 | -0.21 | 0.22  |
| 16.96 | -1.22 | -1.94 | -2.52 | -1.43 | -2.46 | -2.11 | -0.81 | -1.18 | -1.31 | -0.25 | 0.30  |
| 17.31 | -1.41 | -1.41 | -2.08 | -1.52 | -1.15 | -1.59 | -1.29 | -0.54 | -0.46 | -0.50 | 0.33  |
| 17.70 | -2.09 | -1.51 | -1.79 | -2.43 | -2.24 | -0.79 | -0.82 | -1.10 | 0.05  | 0.08  | -0.23 |
| 18.11 | -1.66 | -2.79 | -2.83 | -1.73 | -2.20 | -1.68 | -1.03 | -0.48 | -0.82 | -0.54 | -0.12 |
| 18.56 | -1.72 | -2.22 | -1.35 | -1.63 | -1.96 | -1.04 | -1.43 | -1.10 | -0.73 | -0.19 | -0.32 |
| 19.04 | -1.80 | -2.16 | -1.75 | -1.66 | -1.85 | -1.89 | -1.37 | -0.89 | -0.10 | -0.51 | 0.17  |
| 19.56 | -2.65 | -2.11 | -1.64 | -1.89 | -2.10 | -1.18 | -0.88 | -0.79 | -0.44 | -0.24 | 0.06  |
| 20.12 | -1.71 | -2.13 | -2.61 | -2.44 | -2.83 | -1.29 | -1.54 | -0.88 | -0.95 | -0.42 | 0.24  |
| 20.72 | -1.68 | -1.30 | -1.57 | -2.34 | -2.12 | -1.25 | -0.82 | -1.24 | -0.42 | -0.15 | 0.25  |
| 21.37 | -1.98 | -1.81 | -1.78 | -1.74 | -1.50 | -1.79 | -1.67 | -1.12 | -0.69 | -0.44 | 0.25  |
| 22.08 | -2.33 | -1.85 | -1.14 | -1.89 | -2.78 | -1.39 | -0.67 | -1.29 | -0.63 | 0.16  | 0.17  |
| 22.84 | -1.57 | -1.72 | -1.56 | -1.79 | -1.46 | -2.02 | -0.97 | -1.58 | -0.86 | -0.21 | 0.12  |
| 23.65 | -1.24 | -1.73 | -1.32 | -2.18 | -1.29 | -0.56 | -0.76 | -1.22 | -0.73 | -0.04 | 0.24  |
| 24.54 | -2.14 | -1.81 | -1.83 | -2.39 | -1.38 | -1.06 | -0.64 | -0.76 | -0.97 | -0.43 | 0.05  |
| 25.49 | -2.38 | -2.29 | -1.42 | -1.91 | -2.07 | -1.22 | -1.28 | -1.01 | -0.72 | 0.15  | 0.18  |
| 26.51 | -2.68 | -2.04 | -2.08 | -1.87 | -1.77 | -1.96 | -0.93 | -1.45 | -0.53 | 0.00  | -0.01 |
| 27.62 | -1.90 | -2.21 | -1.73 | -2.70 | -2.12 | -1.66 | -0.94 | -1.57 | -0.31 | -0.40 | 0.06  |
| 28.81 | -1.27 | -2.12 | -2.38 | -2.13 | -2.04 | -1.87 | -0.67 | -1.21 | -0.49 | -0.45 | 0.28  |
| 30.10 | -2.03 | -2.20 | -1.73 | -2.38 | -1.77 | -1.39 | -1.24 | -0.94 | -0.53 | 0.19  | 0.23  |
| 31.49 | -2.14 | -1.83 | -1.21 | -1.93 | -2.23 | -1.52 | -0.88 | -0.99 | -0.30 | -0.03 | 0.42  |
| 32.98 | -1.84 | -2.56 | -1.79 | -1.95 | -1.94 | -0.85 | -0.88 | -0.66 | -0.82 | -0.21 | 0.49  |
| 34.60 | -2.43 | -2.27 | -1.96 | -1.89 | -1.90 | -1.43 | -1.30 | -1.20 | -0.78 | -0.50 | -0.11 |
| 36.34 | -2.05 | -2.51 | -2.14 | -2.15 | -2.76 | -1.25 | -1.35 | -1.28 | -0.49 | -0.03 | 0.06  |
| 38.21 | -1.80 | -2.04 | -1.40 | -1.99 | -1.47 | -1.69 | -1.18 | -1.11 | -0.61 | -0.24 | 0.16  |
| 40.24 | -2.43 | -2.69 | -1.65 | -2.07 | -2.52 | -1.31 | -1.30 | -0.83 | -0.50 | -0.01 | -0.32 |
| 42.42 | -2.18 | -2.11 | -1.67 | -2.39 | -2.02 | -1.76 | -0.93 | -1.20 | -0.56 | -0.83 | 0.05  |

|         |       |       |       |       |       |       |       |       |       |       |       |
|---------|-------|-------|-------|-------|-------|-------|-------|-------|-------|-------|-------|
| 44.78   | -2.50 | -1.81 | -2.48 | -1.53 | -1.89 | -1.19 | -1.29 | -1.16 | -0.63 | -0.24 | 0.24  |
| 47.32   | -2.19 | -2.33 | -2.90 | -2.45 | -2.02 | -1.11 | -1.47 | -0.94 | -0.39 | -0.54 | 0.36  |
| 50.06   | -1.00 | -1.77 | -1.31 | -1.92 | -2.10 | -1.51 | -0.91 | -1.10 | 0.16  | 0.16  | 0.28  |
| 53.01   | -1.89 | -1.71 | -1.64 | -2.18 | -2.01 | -1.84 | -1.04 | -1.30 | -0.37 | 0.33  | 0.13  |
| 56.20   | -2.34 | -3.33 | -2.67 | -2.03 | -2.14 | -1.38 | -1.31 | -1.11 | -0.37 | 0.40  | 0.31  |
| 59.64   | -1.84 | -1.57 | -2.41 | -2.12 | -2.31 | -0.85 | -1.03 | -0.79 | -0.42 | -0.33 | 0.17  |
| 63.34   | -2.03 | -1.89 | -1.22 | -1.88 | -1.75 | -1.06 | -0.83 | -0.67 | -0.25 | 0.39  | 0.13  |
| 67.34   | -3.03 | -2.03 | -1.62 | -1.35 | -1.94 | -1.22 | -0.62 | -1.01 | -0.34 | 0.27  | -0.06 |
| 71.65   | -1.89 | -1.90 | -1.62 | -2.10 | -2.16 | -1.14 | -0.61 | -0.97 | -0.84 | -0.37 | 0.43  |
| 76.30   | -2.10 | -2.61 | -1.43 | -1.85 | -1.39 | -0.77 | -0.37 | -0.63 | -0.42 | 0.02  | 0.84  |
| 81.32   | -2.04 | -2.11 | -1.04 | -1.92 | -2.02 | -1.23 | -0.85 | -0.52 | -0.37 | -0.03 | 0.49  |
| 86.73   | -2.97 | -2.12 | -2.36 | -1.13 | -1.74 | -1.09 | -0.84 | -0.76 | -0.11 | 0.00  | 0.20  |
| 92.56   | -1.27 | -2.25 | -2.32 | -1.78 | -1.81 | -1.13 | -0.29 | -0.85 | -0.45 | 0.30  | 0.54  |
| 98.85   | -1.48 | -2.38 | -1.05 | -1.93 | -1.11 | -1.07 | -1.09 | -0.98 | -0.41 | -0.15 | 0.45  |
| 105.64  | -1.73 | -1.96 | -1.71 | -1.75 | -1.72 | -1.25 | -0.76 | -0.79 | -0.30 | -0.17 | 0.41  |
| 112.96  | -2.02 | -1.22 | -2.55 | -1.07 | -1.87 | -1.54 | -0.72 | -0.85 | -0.14 | -0.15 | 0.21  |
| 120.85  | -2.22 | -1.75 | -1.15 | -1.97 | -1.66 | -0.86 | -0.73 | -0.76 | -0.23 | 0.46  | 0.57  |
| 129.36  | -1.85 | -2.92 | -1.75 | -1.80 | -1.89 | -1.29 | -0.35 | -0.30 | -0.13 | 0.62  | 0.86  |
| 138.55  | -2.26 | -2.15 | -1.54 | -1.53 | -1.67 | -0.42 | 0.17  | -0.41 | 0.30  | 0.50  | 1.09  |
| 148.45  | -1.87 | -1.71 | -1.30 | -1.82 | -1.13 | -0.92 | -0.59 | -0.14 | 0.25  | 0.75  | 0.67  |
| 159.13  | -2.12 | -1.67 | -1.19 | -1.45 | -1.85 | -0.85 | 0.06  | -0.09 | -0.15 | 0.89  | 1.21  |
| 170.65  | -2.24 | -2.42 | -1.67 | -1.85 | -1.51 | -1.09 | -0.55 | -1.05 | -0.51 | 0.36  | 1.00  |
| 183.07  | -1.76 | -1.56 | -1.81 | -1.95 | -1.77 | -1.11 | -0.58 | -0.75 | 0.02  | 0.74  | 0.74  |
| 196.47  | -2.27 | -2.03 | -1.31 | -1.98 | -1.86 | -0.31 | -0.10 | -0.02 | 0.19  | 0.78  | 0.74  |
| 210.91  | -3.10 | -1.44 | -0.93 | -2.05 | -2.34 | -0.42 | -0.44 | -0.49 | 0.42  | 0.74  | 1.35  |
| 226.50  | -1.77 | -1.29 | -1.78 | -1.08 | -1.82 | -1.30 | -0.08 | 0.19  | 0.69  | 0.76  | 1.04  |
| 243.31  | -2.28 | -0.75 | -1.41 | -1.33 | -1.34 | -0.86 | -0.10 | 0.34  | 0.36  | 0.29  | 1.61  |
| 261.43  | -2.10 | -2.26 | -2.21 | -2.11 | -1.63 | -1.04 | -0.12 | 0.35  | 0.45  | 0.93  | 1.28  |
| 280.98  | -2.19 | -2.09 | -1.79 | -1.73 | -2.10 | -0.53 | -0.29 | -0.04 | 0.67  | 0.98  | 1.46  |
| 302.07  | -2.03 | -1.60 | -1.64 | -1.13 | -0.74 | -0.20 | -0.02 | 0.16  | 0.30  | 1.11  | 1.58  |
| 324.81  | -1.64 | -1.96 | -1.49 | -1.59 | -1.79 | -1.14 | -0.04 | 0.05  | 0.55  | 0.73  | 1.84  |
| 349.33  | -1.90 | -1.93 | -0.59 | -1.53 | -1.00 | -0.82 | 0.10  | -0.03 | 0.55  | 1.80  | 1.37  |
| 375.79  | -1.24 | -1.48 | -1.35 | -1.42 | -1.53 | -0.51 | 0.23  | 0.37  | 0.75  | 1.19  | 1.88  |
| 404.31  | -1.62 | -1.49 | -1.38 | -1.49 | -0.98 | -0.72 | -0.11 | 0.50  | 0.49  | 1.24  | 2.01  |
| 435.08  | -2.48 | -1.69 | -1.95 | -1.69 | -1.81 | -0.13 | -0.60 | 0.11  | 0.46  | 0.83  | 1.29  |
| 468.27  | -1.99 | -1.70 | -1.04 | -1.22 | -1.24 | -0.68 | 0.25  | 0.03  | 0.76  | 1.76  | 2.15  |
| 504.06  | -1.89 | -1.43 | -0.98 | -1.50 | -1.03 | -0.36 | 0.84  | 0.60  | 0.60  | 1.25  | 2.12  |
| 542.66  | -1.58 | -1.14 | -1.29 | -1.37 | -0.65 | -0.23 | -0.43 | 0.72  | 1.09  | 1.42  | 2.35  |
| 584.29  | -2.76 | -1.34 | -0.38 | -1.44 | -0.62 | -0.17 | 0.28  | 0.70  | 1.23  | 1.90  | 2.34  |
| 629.18  | -2.49 | -1.77 | -1.36 | -1.25 | -0.53 | -0.51 | -0.02 | 0.53  | 0.95  | 1.45  | 2.11  |
| 677.61  | -2.24 | -1.55 | -1.29 | -1.41 | -1.63 | -0.41 | 0.19  | 0.80  | 0.77  | 1.77  | 1.86  |
| 729.83  | -1.80 | -1.18 | -1.78 | -1.23 | -0.93 | -0.15 | 0.53  | 0.43  | 1.61  | 1.49  | 2.17  |
| 786.16  | -1.73 | -1.12 | -0.83 | -0.76 | -0.53 | -0.03 | 0.59  | 0.56  | 1.51  | 2.04  | 2.21  |
| 846.90  | -1.97 | -1.27 | -1.11 | -1.82 | -0.98 | -0.31 | 0.49  | 0.85  | 1.10  | 1.44  | 1.83  |
| 912.42  | -2.18 | -1.65 | -1.49 | -1.36 | -0.54 | 0.13  | 0.43  | 0.43  | 1.00  | 1.95  | 2.40  |
| 983.08  | -2.00 | -1.26 | -1.36 | -0.70 | -0.35 | -0.48 | 0.87  | 0.77  | 1.18  | 1.77  | 2.38  |
| 1059.29 | -0.98 | -1.67 | -0.93 | -0.72 | -0.88 | -0.46 | 0.33  | 0.74  | 1.61  | 1.49  | 1.90  |
| 1141.48 | -2.07 | -0.84 | -1.31 | -1.32 | -1.58 | -0.10 | 0.51  | 0.15  | 1.48  | 1.71  | 2.34  |
| 1230.13 | -2.23 | -2.08 | -1.69 | -0.35 | -0.58 | 0.48  | 0.80  | 0.65  | 1.01  | 2.00  | 2.39  |
| 1325.73 | -1.37 | -0.37 | -1.35 | -0.93 | -1.39 | -0.32 | 0.71  | 1.10  | 1.24  | 2.03  | 2.89  |

|         |       |       |       |       |       |       |      |      |      |      |      |
|---------|-------|-------|-------|-------|-------|-------|------|------|------|------|------|
| 1428.84 | -1.81 | -1.70 | -1.29 | -1.82 | -0.62 | -0.15 | 0.35 | 0.76 | 1.43 | 2.23 | 2.48 |
| 1540.05 | -0.99 | -1.06 | -0.89 | -0.80 | -0.87 | 0.06  | 0.55 | 0.79 | 1.42 | 2.07 | 2.35 |
| 1659.99 | -0.91 | -2.10 | -1.26 | -1.67 | -1.37 | -0.19 | 0.58 | 0.41 | 1.21 | 1.82 | 2.49 |
| 1789.34 | -2.63 | -2.10 | -1.11 | -1.17 | -0.76 | -0.06 | 0.24 | 0.58 | 1.37 | 1.93 | 2.36 |
| 1928.85 | -1.70 | -0.88 | -0.36 | -0.59 | -0.24 | -0.14 | 0.62 | 0.92 | 1.22 | 2.07 | 2.45 |
| 2079.31 | -2.76 | -1.46 | -0.48 | -0.56 | -1.08 | -0.02 | 1.06 | 0.23 | 1.24 | 2.66 | 2.83 |
| 2241.59 | -1.54 | -2.07 | -0.57 | -1.79 | -0.22 | -0.44 | 0.07 | 0.73 | 1.69 | 2.07 | 2.82 |
| 2416.60 | -1.66 | -1.58 | -1.81 | -0.43 | -0.85 | 0.44  | 0.98 | 0.70 | 1.16 | 1.86 | 2.51 |
| 2605.36 | -1.78 | -1.44 | -0.77 | -1.13 | -0.07 | 0.32  | 0.58 | 1.19 | 1.70 | 2.47 | 2.70 |
| 2808.94 | -3.29 | -1.10 | -0.80 | -1.31 | -0.85 | -0.10 | 0.31 | 0.47 | 1.49 | 1.83 | 2.45 |
| 3028.50 | -2.18 | -0.84 | -1.16 | -1.90 | -0.48 | 0.17  | 0.26 | 0.71 | 1.15 | 2.18 | 2.62 |
| 3265.30 | -1.76 | -1.78 | -1.34 | -1.27 | -0.70 | -0.45 | 0.94 | 0.60 | 1.22 | 1.88 | 2.70 |
| 3520.69 | -1.31 | -1.29 | -0.42 | -1.17 | -0.74 | 0.11  | 0.49 | 1.07 | 1.82 | 2.04 | 2.39 |
| 3796.13 | -1.47 | -1.02 | -1.15 | -0.89 | -0.67 | 0.37  | 0.71 | 0.71 | 1.49 | 1.98 | 2.33 |

| Wavelength<br>Time<br>(ps) | 349.75 | 351.18 | 352.60 | 354.03 | 355.45 | 356.87 | 358.30 | 359.72 | 361.15 | 362.57 | 363.99 |
|----------------------------|--------|--------|--------|--------|--------|--------|--------|--------|--------|--------|--------|
| -3.78                      | 0.34   | -0.05  | -0.15  | -0.02  | -0.11  | -0.09  | 0.03   | 0.03   | -0.07  | -0.09  | -0.08  |
| -3.28                      | 0.48   | -0.26  | 0.21   | -0.19  | 0.08   | -0.12  | -0.02  | -0.06  | 0.03   | 0.05   | 0.16   |
| -2.78                      | -0.09  | 0.00   | 0.05   | 0.05   | 0.14   | 0.23   | 0.16   | 0.06   | -0.03  | -0.23  | 0.00   |
| -2.28                      | -0.05  | -0.03  | 0.08   | 0.26   | -0.21  | 0.12   | -0.23  | -0.17  | 0.18   | -0.01  | -0.12  |
| -1.78                      | -0.01  | 0.36   | 0.22   | 0.03   | 0.01   | -0.18  | 0.07   | 0.22   | -0.01  | -0.07  | -0.05  |
| -1.28                      | 0.03   | 0.13   | 0.13   | 0.06   | 0.08   | 0.10   | 0.25   | 0.02   | 0.11   | 0.30   | 0.18   |
| -0.78                      | -0.63  | -0.07  | -0.30  | -0.25  | 0.02   | -0.18  | -0.09  | -0.05  | -0.16  | 0.01   | 0.07   |
| -0.28                      | -0.08  | -0.09  | -0.23  | 0.06   | 0.00   | 0.13   | -0.18  | -0.07  | -0.04  | 0.03   | -0.16  |
| -0.18                      | -0.28  | -0.21  | 0.25   | 0.11   | -0.05  | 0.03   | -0.10  | -0.04  | -0.17  | 0.14   | -0.06  |
| -0.08                      | 0.19   | 0.26   | 0.10   | 0.11   | -0.43  | -0.02  | -0.09  | -0.30  | -0.07  | 0.07   | 0.13   |
| 0.02                       | -0.03  | 0.28   | -0.22  | 0.08   | 0.03   | -0.25  | 0.11   | -0.41  | 0.13   | -0.20  | -0.12  |
| 0.12                       | -0.09  | 0.02   | 0.43   | 0.16   | 0.09   | 0.06   | -0.06  | 0.05   | 0.20   | 0.07   | 0.03   |
| 0.22                       | 0.25   | -0.44  | -0.14  | -0.26  | 0.06   | -0.18  | -0.10  | -0.07  | -0.04  | -0.22  | -0.25  |
| 0.27                       | 0.38   | -0.01  | 0.04   | -0.13  | 0.02   | 0.20   | 0.14   | 0.04   | 0.28   | 0.13   | 0.00   |
| 0.32                       | 0.05   | -0.26  | -0.07  | 0.03   | -0.16  | 0.05   | -0.06  | 0.00   | -0.03  | -0.10  | -0.17  |
| 0.37                       | 0.01   | 0.16   | 0.23   | 0.10   | -0.18  | 0.22   | 0.19   | 0.08   | 0.10   | 0.09   | 0.10   |
| 0.42                       | 0.02   | 0.33   | 0.07   | 0.17   | 0.12   | 0.20   | 0.09   | -0.09  | 0.40   | 0.20   | -0.24  |
| 0.47                       | -0.08  | -0.11  | 0.13   | 0.22   | 0.21   | 0.42   | 0.09   | -0.03  | 0.18   | -0.12  | -0.08  |
| 0.52                       | -20.01 | -14.95 | -9.25  | -4.42  | -1.79  | -0.24  | 0.16   | -0.16  | 0.24   | 0.16   | -0.06  |
| 0.57                       | 56.09  | 29.36  | 3.33   | -16.70 | -25.85 | -25.29 | -18.23 | -9.77  | -3.35  | -0.49  | 0.18   |
| 0.62                       | 51.16  | 81.46  | 98.64  | 96.18  | 75.54  | 42.18  | 4.93   | -25.27 | -39.18 | -35.48 | -21.84 |
| 0.67                       | -45.39 | -44.04 | -25.88 | 6.24   | 46.70  | 86.23  | 113.26 | 118.14 | 99.92  | 67.43  | 33.12  |
| 0.72                       | -0.21  | -4.20  | -10.10 | -19.70 | -32.64 | -38.25 | -29.45 | -5.23  | 28.00  | 62.29  | 90.21  |
| 0.77                       | 2.33   | 3.63   | 5.29   | 6.16   | 5.83   | 3.22   | 0.60   | -2.47  | -12.05 | -28.51 | -43.72 |
| 0.82                       | 2.84   | 3.89   | 4.14   | 3.54   | 3.72   | 4.64   | 5.81   | 7.11   | 8.05   | 7.94   | 5.83   |
| 0.87                       | 2.64   | 3.02   | 3.28   | 3.62   | 4.12   | 4.77   | 5.36   | 5.44   | 5.45   | 5.66   | 6.19   |
| 0.92                       | 2.32   | 2.59   | 2.74   | 3.50   | 4.11   | 4.60   | 4.64   | 4.98   | 5.47   | 6.22   | 6.58   |
| 0.97                       | 1.80   | 2.52   | 2.71   | 3.32   | 3.65   | 4.41   | 4.50   | 4.50   | 5.46   | 5.94   | 6.26   |
| 1.02                       | 2.26   | 2.24   | 2.91   | 2.85   | 3.19   | 3.81   | 4.17   | 4.91   | 5.27   | 5.62   | 5.96   |
| 1.07                       | 2.08   | 2.51   | 2.71   | 2.86   | 3.54   | 3.91   | 4.26   | 4.57   | 5.04   | 5.31   | 5.32   |
| 1.12                       | 1.70   | 1.96   | 2.24   | 2.80   | 3.41   | 3.92   | 4.50   | 4.30   | 4.98   | 5.35   | 5.90   |

|      |      |      |      |      |      |      |      |      |      |      |      |
|------|------|------|------|------|------|------|------|------|------|------|------|
| 1.17 | 1.43 | 1.61 | 2.41 | 2.61 | 3.07 | 3.36 | 3.41 | 4.02 | 4.29 | 4.68 | 5.10 |
| 1.22 | 1.69 | 1.99 | 2.51 | 2.55 | 3.14 | 3.68 | 3.65 | 4.13 | 4.93 | 5.35 | 5.38 |
| 1.27 | 1.20 | 2.11 | 2.09 | 2.57 | 2.55 | 3.29 | 3.81 | 4.13 | 4.38 | 4.80 | 4.86 |
| 1.32 | 0.98 | 1.54 | 1.94 | 2.17 | 2.78 | 3.22 | 3.39 | 3.73 | 4.19 | 4.55 | 5.01 |
| 1.37 | 1.43 | 1.78 | 1.97 | 2.14 | 2.49 | 3.24 | 3.61 | 3.75 | 4.12 | 4.62 | 4.91 |
| 1.42 | 1.07 | 1.58 | 2.01 | 2.34 | 3.04 | 3.35 | 3.80 | 3.92 | 4.52 | 5.08 | 5.43 |
| 1.47 | 1.48 | 1.89 | 2.03 | 2.41 | 3.10 | 3.29 | 3.80 | 3.91 | 4.59 | 4.90 | 4.77 |
| 1.52 | 1.21 | 1.81 | 2.15 | 2.64 | 2.71 | 3.29 | 3.76 | 3.80 | 4.22 | 4.62 | 4.89 |
| 1.57 | 1.31 | 1.72 | 1.73 | 2.63 | 2.84 | 3.40 | 3.70 | 4.18 | 4.65 | 4.95 | 5.17 |
| 1.62 | 1.24 | 1.91 | 2.04 | 2.48 | 2.74 | 3.22 | 3.38 | 3.99 | 4.34 | 4.59 | 4.64 |
| 1.67 | 1.12 | 1.27 | 2.05 | 2.19 | 2.58 | 3.18 | 3.56 | 4.16 | 4.23 | 4.48 | 5.02 |
| 1.72 | 1.43 | 1.56 | 2.03 | 2.02 | 2.76 | 3.18 | 3.51 | 3.99 | 4.37 | 4.42 | 4.67 |
| 1.77 | 1.57 | 1.72 | 2.17 | 2.33 | 2.60 | 2.99 | 3.56 | 3.80 | 4.54 | 4.85 | 5.07 |
| 1.82 | 1.01 | 1.42 | 1.88 | 2.14 | 2.46 | 3.18 | 3.41 | 3.69 | 4.01 | 4.42 | 4.92 |
| 1.87 | 1.59 | 1.81 | 1.87 | 2.40 | 2.70 | 3.69 | 3.58 | 3.82 | 4.37 | 4.51 | 5.05 |
| 1.92 | 1.50 | 1.88 | 2.19 | 2.83 | 2.86 | 3.38 | 3.68 | 3.90 | 4.28 | 4.57 | 4.95 |
| 1.97 | 1.28 | 1.67 | 2.04 | 2.47 | 2.72 | 2.94 | 3.14 | 3.84 | 4.01 | 4.44 | 4.75 |
| 2.02 | 0.93 | 1.55 | 2.01 | 1.82 | 2.49 | 3.14 | 2.88 | 3.52 | 3.83 | 4.10 | 4.34 |
| 2.07 | 1.13 | 1.68 | 2.02 | 2.51 | 2.73 | 3.55 | 3.71 | 3.83 | 4.08 | 4.81 | 4.95 |
| 2.12 | 1.07 | 1.65 | 1.88 | 2.19 | 2.54 | 3.28 | 3.34 | 4.10 | 4.01 | 4.68 | 4.73 |
| 2.17 | 1.03 | 1.27 | 1.71 | 2.35 | 2.63 | 3.06 | 3.52 | 3.70 | 4.14 | 4.54 | 4.58 |
| 2.22 | 1.39 | 1.66 | 2.27 | 2.18 | 2.92 | 3.36 | 3.63 | 3.84 | 4.01 | 4.35 | 4.85 |
| 2.27 | 1.28 | 1.47 | 2.17 | 2.47 | 2.73 | 3.13 | 3.63 | 3.73 | 4.35 | 4.33 | 4.98 |
| 2.32 | 1.06 | 1.49 | 1.83 | 1.90 | 2.19 | 2.86 | 3.30 | 3.30 | 3.72 | 4.34 | 4.72 |
| 2.37 | 1.32 | 1.71 | 2.26 | 2.55 | 2.67 | 3.27 | 3.67 | 3.71 | 4.02 | 4.41 | 4.99 |
| 2.42 | 1.40 | 1.70 | 1.93 | 2.37 | 2.77 | 3.31 | 3.28 | 3.80 | 4.15 | 4.32 | 4.83 |
| 2.47 | 1.11 | 1.85 | 2.20 | 2.57 | 2.54 | 3.26 | 3.74 | 3.77 | 4.32 | 4.67 | 4.87 |
| 2.52 | 1.02 | 1.96 | 1.94 | 2.47 | 2.57 | 3.05 | 3.64 | 4.03 | 4.39 | 4.57 | 4.84 |
| 2.57 | 1.47 | 1.53 | 2.04 | 2.48 | 2.77 | 3.62 | 3.63 | 3.73 | 4.19 | 4.49 | 4.83 |
| 2.62 | 1.23 | 1.55 | 1.86 | 2.40 | 2.84 | 3.14 | 3.55 | 3.90 | 4.20 | 4.42 | 4.97 |
| 2.67 | 1.36 | 1.47 | 2.01 | 2.42 | 2.56 | 2.85 | 3.41 | 4.02 | 4.23 | 4.42 | 4.45 |
| 2.72 | 1.66 | 1.72 | 2.09 | 2.35 | 2.69 | 3.23 | 3.44 | 3.71 | 4.06 | 4.62 | 4.79 |
| 2.77 | 1.31 | 1.41 | 1.75 | 2.48 | 2.89 | 3.31 | 3.43 | 3.77 | 4.04 | 4.29 | 4.68 |
| 2.82 | 0.86 | 1.50 | 1.72 | 2.14 | 2.79 | 3.05 | 3.20 | 3.78 | 4.12 | 4.28 | 4.68 |
| 2.87 | 1.02 | 1.58 | 1.93 | 1.90 | 2.74 | 2.98 | 3.41 | 3.62 | 4.25 | 4.27 | 4.54 |
| 2.92 | 1.11 | 1.30 | 2.15 | 1.99 | 2.55 | 3.20 | 3.44 | 3.77 | 4.05 | 4.40 | 4.96 |
| 2.97 | 0.76 | 1.25 | 2.05 | 2.01 | 2.65 | 3.20 | 3.17 | 3.69 | 3.91 | 4.41 | 4.77 |
| 3.02 | 0.85 | 1.51 | 2.21 | 2.22 | 2.70 | 3.04 | 3.45 | 3.81 | 4.39 | 4.64 | 5.07 |
| 3.07 | 1.02 | 1.15 | 1.66 | 2.34 | 2.53 | 3.13 | 3.47 | 3.45 | 4.03 | 4.30 | 4.51 |
| 3.12 | 1.27 | 1.54 | 1.64 | 2.26 | 2.71 | 2.87 | 3.05 | 3.49 | 3.99 | 4.16 | 4.75 |
| 3.17 | 1.08 | 1.43 | 2.02 | 2.26 | 2.70 | 3.07 | 3.71 | 3.66 | 4.44 | 4.51 | 4.77 |
| 3.22 | 1.33 | 1.66 | 1.96 | 2.38 | 2.62 | 3.40 | 3.51 | 3.85 | 4.37 | 4.70 | 4.93 |
| 3.42 | 0.92 | 1.11 | 1.75 | 1.83 | 2.38 | 3.07 | 3.12 | 3.49 | 3.95 | 4.33 | 4.63 |
| 3.62 | 0.93 | 1.77 | 1.82 | 1.88 | 2.65 | 2.98 | 3.30 | 3.71 | 4.24 | 4.45 | 4.72 |
| 3.82 | 1.18 | 1.50 | 1.60 | 2.23 | 2.54 | 2.71 | 3.20 | 3.42 | 3.87 | 4.08 | 4.46 |
| 4.02 | 1.25 | 1.71 | 1.73 | 2.35 | 2.88 | 3.34 | 3.71 | 3.87 | 4.16 | 4.72 | 4.83 |
| 4.22 | 1.09 | 1.48 | 1.84 | 1.96 | 2.54 | 2.71 | 3.29 | 3.44 | 3.98 | 4.35 | 4.60 |
| 4.42 | 1.19 | 1.38 | 1.80 | 2.39 | 2.45 | 3.35 | 3.46 | 3.71 | 4.26 | 4.16 | 4.77 |
| 4.62 | 0.76 | 1.12 | 1.72 | 1.88 | 2.58 | 2.66 | 3.12 | 3.23 | 3.71 | 3.93 | 4.74 |
| 4.82 | 1.39 | 1.51 | 1.87 | 2.43 | 2.35 | 3.04 | 3.24 | 3.61 | 4.07 | 4.40 | 4.65 |



|       |      |      |      |      |      |      |      |      |      |      |      |
|-------|------|------|------|------|------|------|------|------|------|------|------|
| 5.02  | 1.06 | 1.64 | 1.90 | 2.20 | 2.74 | 2.99 | 3.32 | 3.61 | 3.89 | 4.48 | 4.50 |
| 5.22  | 1.31 | 1.21 | 1.61 | 2.45 | 2.54 | 2.84 | 3.12 | 3.37 | 3.86 | 4.16 | 4.52 |
| 5.42  | 0.65 | 1.46 | 1.65 | 2.20 | 2.32 | 2.89 | 3.31 | 3.40 | 3.95 | 4.44 | 4.63 |
| 5.62  | 0.77 | 1.35 | 1.84 | 1.99 | 2.35 | 2.85 | 3.27 | 3.40 | 3.87 | 4.29 | 4.90 |
| 5.82  | 0.63 | 1.43 | 1.73 | 1.91 | 2.28 | 2.76 | 3.09 | 3.49 | 4.12 | 4.27 | 4.57 |
| 6.02  | 1.12 | 1.48 | 1.44 | 2.13 | 2.23 | 2.97 | 3.24 | 3.54 | 3.76 | 3.97 | 4.40 |
| 6.22  | 0.82 | 1.40 | 1.95 | 2.27 | 2.33 | 2.87 | 3.32 | 3.40 | 4.06 | 4.39 | 4.54 |
| 6.42  | 0.98 | 1.06 | 1.48 | 2.10 | 2.19 | 3.09 | 3.29 | 3.47 | 3.99 | 4.18 | 4.54 |
| 6.62  | 0.90 | 1.38 | 1.86 | 2.08 | 2.21 | 2.96 | 3.14 | 3.35 | 4.11 | 4.42 | 4.52 |
| 6.82  | 0.68 | 1.02 | 1.60 | 1.83 | 2.27 | 2.66 | 2.76 | 3.31 | 3.75 | 4.14 | 4.46 |
| 7.02  | 0.91 | 1.64 | 1.70 | 2.41 | 2.23 | 2.99 | 3.22 | 3.56 | 3.84 | 4.43 | 4.69 |
| 7.22  | 1.41 | 1.26 | 1.71 | 1.81 | 2.25 | 2.66 | 3.05 | 3.14 | 3.71 | 4.21 | 4.43 |
| 7.42  | 1.41 | 1.98 | 1.86 | 2.14 | 2.62 | 2.99 | 3.17 | 3.85 | 4.30 | 4.41 | 4.69 |
| 7.62  | 1.21 | 1.20 | 1.32 | 2.19 | 2.38 | 2.95 | 3.31 | 3.39 | 3.72 | 3.93 | 4.64 |
| 7.82  | 0.96 | 1.02 | 1.59 | 1.98 | 2.11 | 2.69 | 3.05 | 3.35 | 3.89 | 4.12 | 4.36 |
| 8.02  | 0.66 | 0.93 | 1.74 | 1.76 | 2.27 | 2.65 | 2.84 | 3.57 | 3.62 | 4.13 | 4.53 |
| 8.22  | 0.95 | 1.00 | 1.49 | 1.97 | 2.33 | 3.02 | 2.99 | 3.17 | 3.78 | 4.26 | 4.28 |
| 8.42  | 0.77 | 1.20 | 1.60 | 1.80 | 2.61 | 2.65 | 2.95 | 3.42 | 3.63 | 4.02 | 4.51 |
| 8.62  | 0.68 | 1.15 | 1.64 | 1.40 | 2.13 | 2.64 | 3.04 | 3.31 | 3.72 | 4.10 | 4.50 |
| 8.82  | 0.52 | 1.09 | 1.63 | 2.01 | 2.14 | 2.55 | 3.08 | 3.31 | 3.78 | 3.96 | 4.36 |
| 9.02  | 0.85 | 1.50 | 1.56 | 1.93 | 2.07 | 2.82 | 2.99 | 3.35 | 3.63 | 4.11 | 4.16 |
| 9.22  | 0.95 | 1.14 | 1.41 | 1.89 | 2.22 | 3.01 | 2.99 | 3.34 | 3.86 | 3.84 | 4.61 |
| 9.42  | 0.61 | 0.75 | 1.44 | 1.46 | 2.09 | 2.27 | 2.99 | 3.16 | 3.75 | 3.81 | 4.29 |
| 9.62  | 0.64 | 1.14 | 1.48 | 1.95 | 2.18 | 2.93 | 2.89 | 3.21 | 3.84 | 4.25 | 4.24 |
| 9.82  | 0.69 | 1.18 | 1.39 | 1.61 | 2.28 | 2.73 | 2.71 | 3.06 | 3.57 | 3.74 | 4.07 |
| 10.02 | 0.96 | 0.98 | 1.09 | 1.73 | 2.17 | 2.48 | 2.43 | 2.96 | 3.42 | 3.89 | 3.96 |
| 10.22 | 0.99 | 0.77 | 1.39 | 1.63 | 2.04 | 2.67 | 2.91 | 3.14 | 3.64 | 4.07 | 4.16 |
| 10.42 | 0.95 | 1.40 | 1.55 | 1.79 | 2.24 | 2.59 | 2.91 | 3.15 | 3.62 | 3.83 | 4.11 |
| 10.62 | 0.82 | 1.06 | 1.23 | 1.83 | 2.31 | 2.62 | 2.73 | 3.52 | 3.70 | 3.99 | 4.46 |
| 10.82 | 0.55 | 1.23 | 1.51 | 1.93 | 1.84 | 2.87 | 2.75 | 3.11 | 3.70 | 3.71 | 4.15 |
| 11.02 | 0.79 | 0.88 | 0.95 | 1.74 | 1.75 | 2.38 | 2.76 | 3.17 | 3.58 | 3.77 | 4.21 |
| 11.22 | 0.58 | 0.98 | 1.23 | 1.49 | 1.90 | 2.09 | 2.57 | 2.87 | 3.46 | 3.62 | 3.95 |
| 11.42 | 0.57 | 0.44 | 1.01 | 1.53 | 1.90 | 2.37 | 2.77 | 2.94 | 3.15 | 3.66 | 3.88 |
| 11.62 | 0.93 | 1.21 | 1.26 | 1.84 | 2.01 | 2.95 | 3.08 | 3.18 | 3.56 | 3.85 | 4.08 |
| 11.82 | 0.79 | 1.06 | 1.31 | 1.78 | 2.00 | 2.53 | 2.68 | 3.23 | 3.60 | 3.82 | 4.31 |
| 12.02 | 0.50 | 1.22 | 1.50 | 1.55 | 2.16 | 2.54 | 2.60 | 2.95 | 3.50 | 3.63 | 4.15 |
| 12.22 | 0.71 | 0.89 | 1.49 | 2.00 | 2.30 | 2.60 | 3.02 | 3.53 | 3.51 | 4.05 | 4.35 |
| 12.42 | 0.52 | 1.15 | 1.29 | 1.58 | 2.21 | 2.77 | 2.99 | 3.22 | 3.75 | 3.99 | 4.24 |
| 12.62 | 0.69 | 0.80 | 1.21 | 1.72 | 1.90 | 2.41 | 2.75 | 3.08 | 3.31 | 3.78 | 3.93 |
| 12.82 | 0.46 | 1.11 | 1.35 | 1.59 | 1.76 | 2.36 | 2.40 | 2.63 | 3.27 | 3.62 | 3.65 |
| 13.02 | 0.83 | 1.35 | 1.31 | 1.51 | 1.98 | 2.22 | 2.93 | 3.00 | 3.41 | 3.87 | 4.03 |
| 13.22 | 0.39 | 1.00 | 1.64 | 1.69 | 1.95 | 2.25 | 2.95 | 3.06 | 3.63 | 4.00 | 4.27 |
| 13.42 | 0.53 | 0.80 | 1.19 | 1.71 | 2.13 | 2.61 | 2.74 | 2.98 | 3.42 | 4.01 | 4.28 |
| 13.50 | 0.45 | 0.87 | 1.34 | 1.50 | 1.76 | 2.35 | 2.82 | 2.96 | 3.39 | 3.58 | 3.89 |
| 13.59 | 0.75 | 0.90 | 1.38 | 1.41 | 2.23 | 2.41 | 2.68 | 3.23 | 3.64 | 3.73 | 4.08 |
| 13.68 | 0.56 | 0.84 | 1.18 | 1.52 | 1.78 | 2.50 | 2.81 | 3.12 | 3.41 | 3.74 | 4.05 |
| 13.78 | 0.21 | 1.10 | 1.27 | 1.83 | 1.82 | 2.56 | 2.83 | 3.19 | 3.35 | 3.85 | 4.20 |
| 13.88 | 0.50 | 1.04 | 1.47 | 1.76 | 2.15 | 2.80 | 2.87 | 3.31 | 3.57 | 3.90 | 4.14 |
| 14.00 | 0.42 | 0.81 | 1.44 | 1.62 | 2.01 | 2.31 | 2.83 | 3.10 | 3.48 | 3.80 | 3.99 |
| 14.12 | 0.70 | 0.84 | 1.46 | 1.79 | 2.01 | 2.71 | 3.08 | 3.40 | 3.64 | 3.70 | 4.38 |

|       |       |      |      |      |      |      |      |      |      |      |      |
|-------|-------|------|------|------|------|------|------|------|------|------|------|
| 14.25 | 0.37  | 1.02 | 1.13 | 1.76 | 2.17 | 2.27 | 2.96 | 3.14 | 3.56 | 3.83 | 4.18 |
| 14.40 | 0.57  | 0.90 | 1.12 | 1.94 | 2.38 | 2.65 | 2.96 | 3.19 | 3.72 | 4.16 | 4.17 |
| 14.55 | 0.62  | 0.95 | 1.44 | 1.57 | 2.07 | 2.37 | 2.93 | 3.17 | 3.79 | 3.73 | 4.23 |
| 14.72 | 0.75  | 0.58 | 0.87 | 1.59 | 1.84 | 2.50 | 2.71 | 3.28 | 3.67 | 4.06 | 4.17 |
| 14.90 | 0.40  | 0.79 | 1.25 | 1.32 | 1.93 | 2.28 | 2.51 | 2.71 | 3.26 | 3.50 | 3.85 |
| 15.09 | 0.37  | 0.76 | 1.40 | 1.76 | 1.99 | 2.23 | 2.59 | 3.02 | 3.12 | 3.81 | 3.94 |
| 15.30 | 0.68  | 0.89 | 0.93 | 1.75 | 1.92 | 2.57 | 2.76 | 3.17 | 3.38 | 3.83 | 4.12 |
| 15.53 | 0.74  | 1.11 | 1.55 | 1.86 | 2.34 | 2.54 | 2.87 | 3.42 | 4.17 | 4.00 | 4.34 |
| 15.77 | 0.73  | 0.88 | 1.38 | 1.71 | 2.02 | 2.47 | 3.01 | 2.97 | 3.70 | 3.95 | 4.13 |
| 16.04 | 0.56  | 0.90 | 1.44 | 1.88 | 2.18 | 2.41 | 3.00 | 3.16 | 3.66 | 3.82 | 4.23 |
| 16.32 | 0.32  | 1.15 | 1.34 | 1.54 | 1.84 | 2.28 | 2.67 | 2.73 | 3.47 | 3.56 | 4.10 |
| 16.63 | 0.85  | 1.09 | 1.27 | 1.50 | 1.90 | 2.49 | 2.74 | 3.11 | 3.64 | 3.74 | 4.20 |
| 16.96 | 0.27  | 0.47 | 1.26 | 1.71 | 1.75 | 2.50 | 2.69 | 2.93 | 3.34 | 4.03 | 4.03 |
| 17.31 | 0.46  | 0.85 | 1.31 | 1.63 | 2.05 | 2.14 | 2.97 | 3.00 | 3.61 | 4.09 | 4.03 |
| 17.70 | 0.34  | 1.21 | 1.41 | 1.57 | 2.05 | 2.42 | 2.69 | 3.05 | 3.61 | 3.74 | 4.25 |
| 18.11 | 0.36  | 0.64 | 1.54 | 1.55 | 1.85 | 2.24 | 2.75 | 2.88 | 3.50 | 3.71 | 4.02 |
| 18.56 | 0.93  | 1.25 | 0.85 | 1.68 | 1.87 | 2.32 | 2.64 | 3.06 | 3.51 | 3.62 | 3.84 |
| 19.04 | 0.67  | 0.50 | 1.43 | 1.80 | 2.04 | 2.37 | 2.75 | 2.68 | 3.34 | 3.62 | 3.96 |
| 19.56 | 0.04  | 1.39 | 1.09 | 1.70 | 1.95 | 2.58 | 2.69 | 3.20 | 3.45 | 3.82 | 4.12 |
| 20.12 | -0.01 | 0.90 | 0.88 | 1.67 | 1.91 | 2.42 | 2.71 | 3.28 | 3.54 | 3.76 | 4.12 |
| 20.72 | 0.83  | 1.03 | 1.16 | 1.92 | 2.13 | 2.65 | 2.70 | 3.36 | 3.79 | 3.96 | 4.27 |
| 21.37 | 0.29  | 0.93 | 1.21 | 1.50 | 1.74 | 2.64 | 2.66 | 3.18 | 3.61 | 4.13 | 4.11 |
| 22.08 | 0.60  | 1.31 | 1.79 | 1.65 | 2.51 | 3.02 | 3.38 | 3.66 | 4.06 | 4.14 | 4.49 |
| 22.84 | 0.58  | 1.01 | 1.14 | 1.54 | 1.90 | 2.50 | 2.87 | 3.16 | 3.61 | 3.72 | 4.01 |
| 23.65 | 0.63  | 1.26 | 1.22 | 1.86 | 1.97 | 2.65 | 2.89 | 3.13 | 3.47 | 3.70 | 4.05 |
| 24.54 | 0.41  | 0.63 | 1.43 | 1.56 | 2.14 | 2.18 | 2.86 | 2.87 | 3.59 | 3.77 | 4.16 |
| 25.49 | 0.61  | 1.04 | 1.46 | 2.02 | 2.12 | 2.69 | 3.13 | 3.11 | 3.69 | 3.89 | 4.52 |
| 26.51 | 0.14  | 0.85 | 1.33 | 1.63 | 1.82 | 2.24 | 2.93 | 3.03 | 3.57 | 3.76 | 3.95 |
| 27.62 | 0.61  | 0.79 | 1.08 | 1.60 | 1.90 | 2.21 | 2.78 | 3.10 | 3.81 | 3.82 | 4.22 |
| 28.81 | 0.42  | 0.87 | 1.34 | 1.97 | 2.04 | 2.52 | 2.93 | 3.37 | 3.66 | 3.75 | 4.29 |
| 30.10 | 0.30  | 0.92 | 1.11 | 1.59 | 1.77 | 2.47 | 2.70 | 2.88 | 3.59 | 3.63 | 3.94 |
| 31.49 | 1.05  | 0.88 | 1.24 | 1.16 | 2.07 | 2.30 | 2.82 | 3.18 | 3.43 | 3.76 | 4.20 |
| 32.98 | 0.33  | 0.69 | 1.49 | 1.41 | 2.10 | 2.65 | 2.82 | 3.17 | 3.35 | 3.84 | 4.07 |
| 34.60 | 0.31  | 0.73 | 1.89 | 1.58 | 1.81 | 2.66 | 3.00 | 3.12 | 3.51 | 3.76 | 3.96 |
| 36.34 | 0.61  | 0.87 | 1.61 | 1.86 | 2.14 | 2.53 | 2.54 | 3.13 | 3.73 | 4.16 | 4.31 |
| 38.21 | 0.73  | 0.94 | 1.27 | 1.64 | 1.96 | 2.71 | 2.85 | 3.22 | 3.46 | 3.70 | 4.10 |
| 40.24 | 0.80  | 1.01 | 1.30 | 1.72 | 2.14 | 2.70 | 2.89 | 3.19 | 3.76 | 3.77 | 4.18 |
| 42.42 | 0.63  | 0.60 | 1.02 | 1.51 | 1.79 | 2.36 | 2.75 | 2.82 | 3.23 | 3.89 | 4.16 |
| 44.78 | 0.72  | 0.87 | 1.36 | 1.88 | 2.19 | 2.96 | 2.91 | 3.21 | 3.54 | 3.95 | 4.11 |
| 47.32 | 0.38  | 1.06 | 1.12 | 1.94 | 2.37 | 2.60 | 3.11 | 3.40 | 3.67 | 4.23 | 4.38 |
| 50.06 | 0.90  | 0.96 | 1.52 | 1.97 | 2.43 | 2.71 | 3.26 | 3.43 | 3.81 | 4.29 | 4.54 |
| 53.01 | 0.46  | 1.21 | 1.75 | 1.77 | 2.05 | 2.80 | 3.07 | 3.07 | 3.53 | 3.91 | 4.43 |
| 56.20 | 0.85  | 1.01 | 1.44 | 1.74 | 2.19 | 2.94 | 2.93 | 3.45 | 3.70 | 4.20 | 4.45 |
| 59.64 | 0.45  | 0.97 | 1.10 | 1.68 | 2.16 | 2.47 | 2.81 | 3.28 | 3.71 | 3.79 | 4.28 |
| 63.34 | 0.65  | 1.38 | 1.73 | 2.07 | 2.22 | 2.95 | 3.36 | 3.43 | 3.86 | 4.12 | 4.56 |
| 67.34 | 0.64  | 0.90 | 1.29 | 1.88 | 2.38 | 2.75 | 2.94 | 3.38 | 3.68 | 4.05 | 4.19 |
| 71.65 | 0.55  | 1.27 | 1.31 | 1.76 | 2.24 | 2.76 | 3.32 | 3.24 | 3.85 | 4.20 | 4.45 |
| 76.30 | 0.78  | 0.98 | 1.94 | 1.93 | 2.52 | 2.95 | 3.23 | 3.39 | 4.03 | 3.98 | 4.75 |
| 81.32 | 0.81  | 1.47 | 1.84 | 2.05 | 2.69 | 3.23 | 3.75 | 3.55 | 3.96 | 4.20 | 4.75 |
| 86.73 | 0.74  | 0.92 | 1.54 | 2.14 | 2.46 | 3.00 | 3.60 | 3.55 | 3.94 | 4.29 | 4.69 |

|         |      |      |      |      |      |      |      |      |      |      |      |
|---------|------|------|------|------|------|------|------|------|------|------|------|
| 92.56   | 0.70 | 1.52 | 1.95 | 1.95 | 2.71 | 2.79 | 2.99 | 3.82 | 4.21 | 4.25 | 4.43 |
| 98.85   | 1.08 | 1.27 | 1.74 | 2.11 | 2.53 | 3.13 | 3.31 | 3.56 | 4.14 | 4.35 | 4.41 |
| 105.64  | 0.81 | 1.50 | 1.89 | 2.28 | 2.88 | 3.33 | 3.30 | 3.93 | 4.17 | 4.56 | 4.65 |
| 112.96  | 1.07 | 1.69 | 1.87 | 2.38 | 2.91 | 3.23 | 3.73 | 3.69 | 4.11 | 4.51 | 4.81 |
| 120.85  | 1.14 | 1.47 | 1.60 | 2.35 | 2.23 | 3.00 | 3.34 | 3.54 | 4.10 | 4.32 | 4.57 |
| 129.36  | 1.01 | 1.83 | 2.24 | 2.80 | 2.91 | 3.88 | 3.99 | 4.23 | 4.47 | 4.80 | 5.09 |
| 138.55  | 1.41 | 1.55 | 2.27 | 2.65 | 3.08 | 3.59 | 3.54 | 3.96 | 4.57 | 4.66 | 5.04 |
| 148.45  | 1.35 | 1.87 | 2.43 | 2.75 | 2.96 | 3.58 | 4.00 | 4.21 | 4.43 | 4.93 | 5.31 |
| 159.13  | 1.34 | 1.83 | 2.28 | 2.46 | 3.34 | 3.64 | 4.07 | 4.33 | 4.76 | 5.20 | 5.19 |
| 170.65  | 1.40 | 1.48 | 2.41 | 2.80 | 3.07 | 3.47 | 3.84 | 4.10 | 4.69 | 4.98 | 5.18 |
| 183.07  | 1.68 | 2.20 | 2.30 | 2.81 | 3.53 | 3.79 | 3.78 | 4.44 | 4.62 | 5.23 | 5.15 |
| 196.47  | 1.57 | 1.95 | 2.65 | 2.76 | 3.22 | 3.55 | 4.02 | 4.14 | 4.66 | 5.04 | 5.32 |
| 210.91  | 1.61 | 2.08 | 2.55 | 3.03 | 3.42 | 3.67 | 4.07 | 4.56 | 4.92 | 4.97 | 5.45 |
| 226.50  | 1.70 | 2.11 | 2.65 | 3.09 | 3.61 | 3.75 | 4.39 | 4.30 | 4.77 | 4.95 | 5.19 |
| 243.31  | 1.61 | 2.52 | 2.85 | 2.98 | 3.41 | 4.00 | 4.54 | 4.66 | 4.79 | 5.23 | 5.55 |
| 261.43  | 1.96 | 2.38 | 2.83 | 3.33 | 3.44 | 4.08 | 4.61 | 4.73 | 5.15 | 5.66 | 5.71 |
| 280.98  | 1.79 | 2.04 | 2.83 | 3.35 | 3.62 | 4.39 | 4.62 | 4.76 | 5.37 | 5.58 | 5.77 |
| 302.07  | 1.88 | 2.31 | 3.07 | 3.50 | 3.86 | 4.07 | 4.62 | 4.64 | 5.29 | 5.55 | 5.85 |
| 324.81  | 2.18 | 2.43 | 2.90 | 3.24 | 3.67 | 4.17 | 4.73 | 5.14 | 5.40 | 5.44 | 6.01 |
| 349.33  | 2.33 | 2.54 | 3.15 | 3.44 | 4.18 | 4.70 | 4.85 | 4.92 | 5.51 | 5.53 | 5.74 |
| 375.79  | 1.96 | 2.78 | 3.52 | 3.57 | 4.02 | 4.32 | 4.98 | 5.20 | 5.73 | 5.94 | 5.98 |
| 404.31  | 2.38 | 3.03 | 3.24 | 3.57 | 3.95 | 4.82 | 5.03 | 5.27 | 5.68 | 5.97 | 5.78 |
| 435.08  | 2.26 | 2.67 | 3.14 | 3.69 | 4.39 | 5.06 | 5.23 | 5.51 | 5.80 | 6.11 | 6.67 |
| 468.27  | 2.74 | 2.96 | 3.67 | 4.16 | 4.50 | 4.86 | 5.29 | 5.54 | 6.21 | 6.41 | 6.38 |
| 504.06  | 2.42 | 2.89 | 3.34 | 3.84 | 4.48 | 4.78 | 4.99 | 5.58 | 5.80 | 6.16 | 6.45 |
| 542.66  | 2.33 | 2.96 | 3.77 | 4.02 | 4.71 | 5.19 | 5.27 | 5.59 | 6.11 | 6.14 | 6.85 |
| 584.29  | 2.79 | 3.32 | 3.72 | 4.33 | 4.52 | 5.09 | 5.50 | 5.38 | 6.14 | 6.41 | 6.66 |
| 629.18  | 2.59 | 3.08 | 3.78 | 4.04 | 4.70 | 4.87 | 5.69 | 5.56 | 5.81 | 6.43 | 6.51 |
| 677.61  | 2.53 | 3.26 | 3.41 | 3.83 | 4.30 | 4.85 | 5.20 | 5.42 | 5.91 | 6.15 | 6.41 |
| 729.83  | 2.65 | 3.07 | 3.56 | 4.31 | 4.49 | 5.29 | 5.27 | 5.77 | 6.21 | 6.30 | 6.35 |
| 786.16  | 2.90 | 3.55 | 3.99 | 4.20 | 4.93 | 5.12 | 5.37 | 5.59 | 6.08 | 6.15 | 6.67 |
| 846.90  | 2.87 | 3.40 | 3.75 | 4.14 | 4.84 | 5.44 | 5.49 | 5.69 | 5.91 | 6.46 | 6.73 |
| 912.42  | 2.62 | 3.34 | 3.59 | 4.45 | 4.63 | 5.14 | 5.56 | 5.57 | 6.36 | 6.42 | 6.80 |
| 983.08  | 2.81 | 3.34 | 4.07 | 4.61 | 4.81 | 5.23 | 5.63 | 5.89 | 6.12 | 6.61 | 6.76 |
| 1059.29 | 2.69 | 3.58 | 3.87 | 4.32 | 4.86 | 5.24 | 5.65 | 5.47 | 6.48 | 6.39 | 6.91 |
| 1141.48 | 2.75 | 3.60 | 3.80 | 4.31 | 4.94 | 5.22 | 5.60 | 5.90 | 6.18 | 6.76 | 6.57 |
| 1230.13 | 3.05 | 3.60 | 4.18 | 4.52 | 5.13 | 5.50 | 5.66 | 6.22 | 6.38 | 6.64 | 6.87 |
| 1325.73 | 3.17 | 3.55 | 4.33 | 4.64 | 5.12 | 5.63 | 5.68 | 6.24 | 6.85 | 6.76 | 6.98 |
| 1428.84 | 2.83 | 3.69 | 4.28 | 4.42 | 4.88 | 5.46 | 5.66 | 6.35 | 6.77 | 6.84 | 7.09 |
| 1540.05 | 2.85 | 3.58 | 4.05 | 4.60 | 4.99 | 5.53 | 5.90 | 6.30 | 6.48 | 6.93 | 6.97 |
| 1659.99 | 2.59 | 3.38 | 4.01 | 4.51 | 5.11 | 5.30 | 5.82 | 5.86 | 6.11 | 6.39 | 6.81 |
| 1789.34 | 2.91 | 3.44 | 4.07 | 4.50 | 4.89 | 5.54 | 6.09 | 6.01 | 6.75 | 6.81 | 7.02 |
| 1928.85 | 2.95 | 3.68 | 4.11 | 4.57 | 4.99 | 5.12 | 5.59 | 6.11 | 6.42 | 6.54 | 6.88 |
| 2079.31 | 2.89 | 3.53 | 4.06 | 4.18 | 4.88 | 5.40 | 5.70 | 6.09 | 6.38 | 6.67 | 6.79 |
| 2241.59 | 3.11 | 3.78 | 4.31 | 4.49 | 5.02 | 5.70 | 5.62 | 6.20 | 6.52 | 6.68 | 7.18 |
| 2416.60 | 3.12 | 3.39 | 4.24 | 4.50 | 5.02 | 5.79 | 6.33 | 6.40 | 6.74 | 6.82 | 7.01 |
| 2605.36 | 3.06 | 3.28 | 4.01 | 4.28 | 4.78 | 5.41 | 5.64 | 6.19 | 6.47 | 6.50 | 7.07 |
| 2808.94 | 2.69 | 3.39 | 4.21 | 4.47 | 4.96 | 5.49 | 5.67 | 6.02 | 6.49 | 6.76 | 6.84 |
| 3028.50 | 3.20 | 3.61 | 4.03 | 4.54 | 4.87 | 5.24 | 5.57 | 6.01 | 6.49 | 6.44 | 6.53 |
| 3265.30 | 2.86 | 3.24 | 3.86 | 4.16 | 4.62 | 5.15 | 5.48 | 5.66 | 5.95 | 6.20 | 6.56 |

|         |      |      |      |      |      |      |      |      |      |      |      |
|---------|------|------|------|------|------|------|------|------|------|------|------|
| 3520.69 | 3.45 | 3.53 | 4.05 | 4.51 | 4.83 | 5.54 | 5.71 | 5.81 | 6.12 | 6.57 | 6.72 |
| 3796.13 | 3.17 | 3.85 | 4.28 | 4.46 | 4.74 | 5.36 | 5.52 | 5.89 | 6.36 | 6.81 | 6.65 |

| Wavelength (nm) \ Time (ps) | 365.42 | 366.84 | 368.27 | 369.69 | 371.11 | 372.54 | 373.96 | 375.39 | 376.81 | 378.23 | 379.66 |
|-----------------------------|--------|--------|--------|--------|--------|--------|--------|--------|--------|--------|--------|
| -3.78                       | 0.05   | -0.14  | -0.09  | -0.11  | -0.30  | -0.06  | 0.06   | -0.20  | -0.06  | -0.35  | -0.18  |
| -3.28                       | -0.02  | -0.02  | -0.11  | -0.13  | -0.32  | -0.18  | -0.26  | -0.02  | -0.23  | -0.20  | 0.05   |
| -2.78                       | -0.23  | 0.01   | -0.03  | 0.05   | 0.05   | -0.03  | 0.00   | -0.19  | -0.02  | -0.08  | -0.25  |
| -2.28                       | -0.03  | -0.08  | -0.05  | 0.07   | 0.03   | 0.03   | -0.12  | 0.16   | -0.05  | 0.08   | -0.06  |
| -1.78                       | 0.11   | 0.18   | -0.07  | -0.06  | 0.05   | 0.03   | 0.01   | -0.03  | 0.00   | 0.14   | 0.12   |
| -1.28                       | 0.31   | 0.09   | 0.27   | 0.27   | 0.31   | 0.30   | 0.13   | 0.20   | 0.09   | 0.29   | 0.32   |
| -0.78                       | 0.09   | -0.02  | 0.11   | 0.09   | 0.10   | 0.09   | 0.22   | 0.21   | 0.30   | 0.20   | 0.04   |
| -0.28                       | -0.28  | -0.02  | -0.04  | -0.19  | 0.08   | -0.19  | -0.05  | -0.12  | -0.03  | -0.09  | -0.05  |
| -0.18                       | 0.00   | 0.13   | 0.00   | 0.03   | 0.16   | -0.11  | 0.12   | -0.02  | 0.12   | -0.07  | -0.05  |
| -0.08                       | 0.13   | -0.04  | -0.06  | 0.13   | 0.01   | -0.19  | 0.06   | -0.05  | -0.13  | 0.21   | 0.06   |
| 0.02                        | 0.05   | 0.06   | -0.12  | 0.07   | -0.08  | 0.10   | 0.01   | 0.12   | 0.11   | 0.00   | 0.07   |
| 0.12                        | -0.09  | 0.24   | 0.05   | 0.02   | 0.08   | 0.00   | -0.04  | -0.07  | -0.25  | 0.20   | -0.15  |
| 0.22                        | 0.03   | -0.15  | -0.12  | -0.17  | -0.17  | -0.11  | -0.06  | -0.14  | 0.07   | -0.06  | -0.16  |
| 0.27                        | 0.22   | 0.17   | 0.05   | 0.08   | 0.07   | 0.04   | 0.01   | 0.21   | 0.23   | 0.16   | -0.05  |
| 0.32                        | -0.29  | -0.30  | -0.29  | 0.04   | -0.18  | -0.38  | -0.18  | -0.36  | -0.27  | -0.24  | -0.42  |
| 0.37                        | 0.01   | 0.11   | -0.03  | 0.05   | 0.24   | -0.03  | 0.16   | 0.14   | -0.01  | 0.01   | 0.11   |
| 0.42                        | 0.13   | 0.07   | 0.34   | 0.18   | 0.11   | 0.00   | 0.04   | 0.04   | 0.26   | -0.01  | -0.03  |
| 0.47                        | 0.36   | 0.42   | 0.30   | 0.23   | 0.26   | 0.37   | 0.34   | 0.17   | 0.20   | 0.07   | 0.26   |
| 0.52                        | 0.10   | -0.12  | 0.21   | 0.05   | 0.10   | -0.05  | 0.09   | 0.05   | 0.07   | -0.15  | -0.04  |
| 0.57                        | -0.01  | 0.12   | -0.02  | 0.05   | -0.11  | -0.25  | -0.11  | -0.16  | -0.12  | -0.12  | -0.04  |
| 0.62                        | -9.30  | -3.72  | -2.43  | -1.67  | -0.27  | 0.41   | 0.22   | -0.08  | -0.15  | 0.00   | -0.20  |
| 0.67                        | 4.91   | -15.59 | -29.24 | -34.44 | -29.95 | -17.93 | -6.41  | -1.03  | -0.08  | 0.13   | 0.38   |
| 0.72                        | 108.36 | 113.73 | 103.51 | 76.76  | 37.68  | -1.68  | -30.35 | -43.37 | -41.32 | -31.59 | -19.08 |
| 0.77                        | -47.08 | -32.88 | -1.74  | 42.05  | 86.06  | 118.67 | 132.00 | 122.81 | 96.73  | 59.48  | 19.15  |
| 0.82                        | 3.63   | 1.85   | -3.82  | -16.79 | -32.23 | -39.71 | -32.47 | -9.31  | 26.21  | 67.01  | 103.55 |
| 0.87                        | 7.26   | 8.73   | 9.73   | 10.10  | 9.64   | 8.05   | 6.93   | 4.90   | -2.41  | -16.94 | -32.29 |
| 0.92                        | 7.65   | 7.91   | 7.78   | 7.74   | 8.51   | 9.22   | 10.13  | 10.88  | 11.98  | 12.51  | 11.58  |
| 0.97                        | 6.76   | 7.06   | 7.62   | 8.08   | 8.59   | 8.76   | 9.60   | 9.73   | 9.66   | 9.81   | 10.97  |
| 1.02                        | 6.42   | 6.77   | 7.31   | 7.99   | 8.49   | 8.66   | 9.24   | 9.30   | 9.93   | 10.09  | 10.47  |
| 1.07                        | 6.27   | 6.55   | 6.99   | 7.78   | 8.01   | 8.21   | 8.40   | 8.88   | 9.60   | 10.22  | 10.31  |
| 1.12                        | 5.83   | 6.48   | 7.04   | 7.39   | 7.55   | 7.82   | 8.29   | 8.80   | 9.12   | 9.42   | 10.01  |
| 1.17                        | 5.57   | 6.02   | 6.45   | 6.72   | 7.41   | 7.64   | 8.22   | 8.05   | 8.63   | 8.94   | 8.99   |
| 1.22                        | 5.58   | 6.37   | 6.76   | 7.14   | 7.32   | 8.06   | 8.51   | 8.39   | 9.10   | 9.61   | 9.96   |
| 1.27                        | 5.51   | 5.57   | 6.12   | 6.87   | 7.17   | 7.32   | 7.54   | 8.02   | 8.34   | 8.43   | 8.83   |
| 1.32                        | 5.55   | 5.92   | 6.29   | 6.37   | 7.09   | 7.23   | 7.66   | 7.73   | 8.29   | 8.56   | 8.64   |
| 1.37                        | 5.30   | 5.74   | 6.06   | 6.27   | 6.74   | 7.07   | 7.74   | 7.74   | 8.06   | 8.41   | 8.82   |
| 1.42                        | 5.54   | 5.87   | 6.38   | 6.87   | 7.08   | 7.40   | 7.63   | 7.87   | 8.41   | 8.46   | 8.74   |
| 1.47                        | 5.28   | 6.10   | 6.29   | 6.57   | 6.84   | 7.51   | 7.46   | 7.82   | 8.11   | 8.55   | 8.81   |
| 1.52                        | 5.57   | 6.09   | 6.35   | 6.74   | 6.73   | 7.24   | 7.58   | 7.88   | 8.20   | 8.43   | 8.82   |
| 1.57                        | 5.34   | 5.80   | 6.08   | 6.67   | 7.11   | 7.02   | 7.62   | 7.80   | 8.19   | 8.56   | 8.40   |
| 1.62                        | 5.30   | 5.70   | 6.06   | 6.19   | 6.45   | 6.98   | 7.33   | 7.30   | 7.86   | 7.96   | 8.34   |
| 1.67                        | 5.23   | 5.70   | 6.23   | 6.56   | 6.79   | 6.94   | 7.49   | 7.39   | 7.80   | 8.05   | 8.27   |
| 1.72                        | 5.36   | 5.47   | 5.92   | 6.32   | 6.52   | 6.64   | 7.07   | 7.27   | 7.74   | 7.93   | 8.08   |

|      |      |      |      |      |      |      |      |      |      |      |      |
|------|------|------|------|------|------|------|------|------|------|------|------|
| 1.77 | 5.43 | 5.83 | 6.04 | 6.47 | 6.62 | 7.17 | 7.44 | 7.57 | 7.74 | 8.11 | 8.52 |
| 1.82 | 4.88 | 5.48 | 5.91 | 6.28 | 6.26 | 6.65 | 7.19 | 7.44 | 7.47 | 7.77 | 7.97 |
| 1.87 | 5.40 | 5.82 | 6.03 | 6.58 | 6.83 | 7.16 | 7.47 | 7.98 | 7.87 | 8.34 | 8.20 |
| 1.92 | 5.23 | 5.92 | 6.00 | 6.50 | 6.49 | 6.77 | 7.36 | 7.55 | 7.38 | 7.77 | 8.17 |
| 1.97 | 5.11 | 5.40 | 5.71 | 6.01 | 6.43 | 6.57 | 6.85 | 7.24 | 7.34 | 7.70 | 7.77 |
| 2.02 | 4.89 | 5.04 | 5.42 | 5.85 | 5.90 | 6.42 | 6.54 | 6.80 | 7.11 | 7.51 | 7.63 |
| 2.07 | 5.37 | 5.72 | 5.97 | 6.17 | 6.51 | 6.86 | 7.26 | 7.26 | 7.60 | 7.83 | 8.23 |
| 2.12 | 5.08 | 5.44 | 5.66 | 6.31 | 6.41 | 6.84 | 7.05 | 7.24 | 7.57 | 7.83 | 8.02 |
| 2.17 | 4.89 | 5.47 | 5.81 | 5.93 | 6.24 | 6.75 | 6.85 | 6.96 | 7.50 | 7.72 | 7.86 |
| 2.22 | 5.21 | 5.67 | 5.86 | 6.17 | 6.41 | 6.82 | 7.07 | 7.26 | 7.61 | 7.91 | 7.96 |
| 2.27 | 4.99 | 5.56 | 5.93 | 6.26 | 6.43 | 6.71 | 7.02 | 7.27 | 7.60 | 7.89 | 8.09 |
| 2.32 | 4.72 | 5.18 | 5.75 | 5.92 | 6.22 | 6.58 | 6.76 | 6.96 | 7.14 | 7.58 | 7.86 |
| 2.37 | 5.40 | 5.57 | 5.85 | 6.46 | 6.75 | 6.53 | 7.10 | 7.12 | 7.50 | 7.75 | 7.57 |
| 2.42 | 5.24 | 5.72 | 5.87 | 6.11 | 6.51 | 6.79 | 7.23 | 7.28 | 7.53 | 7.78 | 8.02 |
| 2.47 | 5.45 | 5.46 | 6.11 | 6.31 | 6.44 | 6.78 | 7.13 | 7.40 | 7.49 | 8.00 | 7.96 |
| 2.52 | 5.42 | 5.55 | 6.07 | 6.28 | 6.73 | 6.73 | 7.28 | 7.10 | 7.75 | 7.91 | 7.82 |
| 2.57 | 5.36 | 5.71 | 6.18 | 6.18 | 6.63 | 6.61 | 7.06 | 7.34 | 7.49 | 7.72 | 7.98 |
| 2.62 | 5.09 | 5.44 | 5.94 | 6.31 | 6.46 | 6.59 | 6.93 | 7.16 | 7.54 | 7.69 | 7.95 |
| 2.67 | 5.15 | 5.47 | 5.62 | 6.12 | 6.45 | 6.29 | 6.78 | 7.08 | 7.28 | 7.55 | 7.76 |
| 2.72 | 5.04 | 5.30 | 5.85 | 5.92 | 6.26 | 6.31 | 6.88 | 6.75 | 7.26 | 7.37 | 7.63 |
| 2.77 | 5.05 | 5.59 | 5.77 | 5.81 | 6.45 | 6.59 | 6.86 | 7.01 | 7.34 | 7.44 | 7.63 |
| 2.82 | 5.05 | 5.39 | 5.63 | 6.19 | 6.36 | 6.60 | 6.91 | 6.91 | 7.47 | 7.69 | 7.67 |
| 2.87 | 4.96 | 5.40 | 5.68 | 5.90 | 6.25 | 6.60 | 6.69 | 6.95 | 7.18 | 7.55 | 7.60 |
| 2.92 | 5.10 | 5.40 | 5.78 | 6.31 | 6.29 | 6.59 | 6.76 | 7.20 | 7.54 | 7.71 | 7.68 |
| 2.97 | 4.92 | 5.27 | 5.65 | 5.99 | 6.04 | 6.41 | 6.74 | 7.12 | 7.07 | 7.28 | 7.68 |
| 3.02 | 5.25 | 5.65 | 6.04 | 6.23 | 6.45 | 6.85 | 7.09 | 7.10 | 7.30 | 7.50 | 8.09 |
| 3.07 | 5.08 | 5.59 | 5.62 | 6.17 | 6.61 | 6.77 | 7.02 | 6.92 | 7.46 | 7.63 | 7.60 |
| 3.12 | 4.83 | 5.26 | 5.48 | 5.66 | 6.13 | 6.37 | 6.61 | 6.87 | 7.31 | 7.31 | 7.41 |
| 3.17 | 5.07 | 5.76 | 5.86 | 6.32 | 6.15 | 6.50 | 7.04 | 7.09 | 7.33 | 7.63 | 7.66 |
| 3.22 | 5.02 | 5.49 | 5.90 | 6.38 | 6.56 | 6.66 | 7.04 | 7.21 | 7.38 | 7.71 | 7.89 |
| 3.42 | 4.85 | 5.36 | 5.64 | 6.22 | 6.27 | 6.54 | 7.10 | 7.00 | 7.25 | 7.46 | 7.76 |
| 3.62 | 5.31 | 5.64 | 5.99 | 6.52 | 6.44 | 6.62 | 7.03 | 7.19 | 7.55 | 7.54 | 8.02 |
| 3.82 | 4.83 | 5.13 | 5.45 | 5.74 | 6.08 | 6.38 | 6.58 | 6.77 | 7.23 | 7.27 | 7.64 |
| 4.02 | 5.01 | 5.72 | 5.96 | 6.35 | 6.55 | 6.70 | 7.11 | 7.16 | 7.41 | 7.86 | 7.91 |
| 4.22 | 4.91 | 5.16 | 5.42 | 5.98 | 6.12 | 6.41 | 6.63 | 6.97 | 7.00 | 7.25 | 7.40 |
| 4.42 | 5.16 | 5.41 | 5.97 | 6.22 | 6.40 | 6.66 | 6.97 | 6.89 | 7.09 | 7.73 | 7.66 |
| 4.62 | 4.84 | 5.31 | 5.60 | 5.77 | 6.13 | 6.27 | 6.70 | 6.81 | 6.99 | 7.31 | 7.40 |
| 4.82 | 4.75 | 5.37 | 5.66 | 6.02 | 6.34 | 6.33 | 6.69 | 6.86 | 7.14 | 7.29 | 7.57 |
| 5.02 | 4.98 | 5.50 | 5.74 | 6.15 | 6.38 | 6.43 | 6.95 | 6.93 | 7.30 | 7.47 | 7.63 |
| 5.22 | 4.71 | 5.13 | 5.67 | 5.83 | 6.11 | 6.24 | 6.60 | 6.65 | 6.95 | 7.16 | 7.29 |
| 5.42 | 5.01 | 5.25 | 5.56 | 5.68 | 6.14 | 6.40 | 6.58 | 6.75 | 7.06 | 7.16 | 7.19 |
| 5.62 | 4.74 | 5.21 | 5.44 | 5.66 | 5.87 | 6.30 | 6.70 | 6.68 | 7.00 | 7.39 | 7.36 |
| 5.82 | 5.17 | 5.46 | 5.52 | 5.95 | 6.16 | 6.38 | 6.65 | 6.94 | 6.91 | 7.21 | 7.43 |
| 6.02 | 4.84 | 5.43 | 5.30 | 5.76 | 6.04 | 6.20 | 6.49 | 6.50 | 6.82 | 7.08 | 7.02 |
| 6.22 | 4.94 | 5.32 | 5.63 | 5.87 | 6.26 | 6.71 | 6.74 | 6.89 | 7.14 | 7.25 | 7.45 |
| 6.42 | 4.83 | 5.10 | 5.48 | 5.69 | 6.05 | 6.32 | 6.80 | 6.95 | 7.08 | 7.32 | 7.23 |
| 6.62 | 5.11 | 5.14 | 5.57 | 5.91 | 5.96 | 6.34 | 6.54 | 6.89 | 6.97 | 7.10 | 7.32 |
| 6.82 | 4.66 | 5.21 | 5.36 | 5.81 | 5.87 | 6.13 | 6.45 | 6.63 | 6.63 | 7.23 | 7.23 |
| 7.02 | 5.10 | 5.40 | 5.62 | 5.99 | 6.04 | 6.53 | 6.81 | 7.07 | 7.07 | 7.32 | 7.57 |
| 7.22 | 4.71 | 5.00 | 5.17 | 5.85 | 5.83 | 6.18 | 6.39 | 6.77 | 6.75 | 7.04 | 7.12 |

|       |      |      |      |      |      |      |      |      |      |      |      |
|-------|------|------|------|------|------|------|------|------|------|------|------|
| 7.42  | 4.99 | 5.53 | 5.71 | 6.07 | 6.43 | 6.59 | 6.95 | 7.08 | 7.17 | 7.33 | 7.51 |
| 7.62  | 4.61 | 5.20 | 5.33 | 5.74 | 6.01 | 6.21 | 6.62 | 6.87 | 6.85 | 7.00 | 7.21 |
| 7.82  | 4.85 | 5.19 | 5.44 | 5.79 | 6.07 | 6.25 | 6.22 | 6.76 | 6.87 | 7.11 | 7.06 |
| 8.02  | 4.87 | 5.05 | 5.34 | 5.50 | 6.09 | 6.36 | 6.27 | 6.65 | 6.85 | 7.08 | 7.03 |
| 8.22  | 4.53 | 4.98 | 5.28 | 5.63 | 5.98 | 6.22 | 6.41 | 6.49 | 6.87 | 6.92 | 7.08 |
| 8.42  | 4.90 | 5.05 | 5.11 | 5.56 | 5.95 | 5.97 | 6.42 | 6.50 | 6.79 | 6.87 | 7.14 |
| 8.62  | 4.26 | 5.12 | 5.09 | 5.52 | 5.87 | 5.95 | 6.19 | 6.49 | 6.58 | 6.82 | 6.87 |
| 8.82  | 4.61 | 5.18 | 5.24 | 5.42 | 5.89 | 6.26 | 6.32 | 6.23 | 6.64 | 7.02 | 7.30 |
| 9.02  | 4.72 | 5.18 | 5.20 | 5.56 | 5.94 | 6.02 | 6.39 | 6.64 | 6.77 | 6.78 | 7.04 |
| 9.22  | 4.86 | 5.13 | 5.36 | 5.55 | 5.81 | 6.01 | 6.55 | 6.55 | 6.98 | 7.22 | 7.19 |
| 9.42  | 4.51 | 4.81 | 5.17 | 5.47 | 5.66 | 5.86 | 6.38 | 6.51 | 6.73 | 6.64 | 6.82 |
| 9.62  | 4.75 | 4.96 | 5.46 | 5.70 | 5.87 | 6.04 | 6.21 | 6.47 | 6.68 | 7.02 | 7.24 |
| 9.82  | 4.37 | 4.88 | 5.24 | 5.48 | 5.61 | 5.91 | 6.23 | 6.26 | 6.62 | 6.78 | 6.83 |
| 10.02 | 4.53 | 4.85 | 5.31 | 5.44 | 5.71 | 5.97 | 6.17 | 6.42 | 6.47 | 6.81 | 7.05 |
| 10.22 | 4.47 | 4.95 | 5.24 | 5.52 | 5.71 | 5.78 | 6.28 | 6.21 | 6.77 | 6.85 | 7.03 |
| 10.42 | 4.62 | 4.98 | 5.05 | 5.39 | 5.59 | 5.93 | 6.22 | 6.38 | 6.56 | 6.81 | 6.87 |
| 10.62 | 4.68 | 4.98 | 5.09 | 5.56 | 5.52 | 5.79 | 6.20 | 6.15 | 6.78 | 6.92 | 6.97 |
| 10.82 | 4.52 | 4.94 | 5.17 | 5.42 | 5.63 | 5.83 | 6.05 | 6.24 | 6.65 | 6.91 | 6.65 |
| 11.02 | 4.58 | 4.98 | 5.11 | 5.49 | 5.46 | 5.74 | 6.04 | 6.45 | 6.55 | 6.83 | 7.10 |
| 11.22 | 4.30 | 4.71 | 5.17 | 5.30 | 5.44 | 5.85 | 6.19 | 6.33 | 6.50 | 6.73 | 6.89 |
| 11.42 | 4.20 | 4.76 | 4.87 | 5.17 | 5.50 | 5.54 | 6.09 | 6.03 | 6.20 | 6.43 | 6.39 |
| 11.62 | 4.67 | 5.19 | 5.42 | 5.62 | 5.99 | 6.14 | 6.21 | 6.41 | 6.62 | 7.09 | 7.16 |
| 11.82 | 4.46 | 4.85 | 5.05 | 5.44 | 5.76 | 6.16 | 6.42 | 6.57 | 6.42 | 6.66 | 7.00 |
| 12.02 | 4.17 | 4.69 | 5.01 | 5.21 | 5.49 | 5.84 | 6.07 | 6.10 | 6.37 | 6.72 | 6.80 |
| 12.22 | 4.51 | 4.96 | 5.05 | 5.41 | 5.71 | 5.80 | 6.26 | 6.31 | 6.82 | 6.96 | 7.02 |
| 12.42 | 4.59 | 4.84 | 5.36 | 5.49 | 5.75 | 6.06 | 6.27 | 6.48 | 7.08 | 7.08 | 6.99 |
| 12.62 | 4.42 | 4.77 | 4.74 | 5.26 | 5.50 | 5.79 | 6.00 | 6.20 | 6.37 | 6.61 | 6.70 |
| 12.82 | 4.26 | 4.64 | 4.58 | 5.26 | 5.31 | 5.57 | 5.86 | 5.83 | 6.00 | 6.50 | 6.53 |
| 13.02 | 4.29 | 4.75 | 4.84 | 5.25 | 5.33 | 5.59 | 5.91 | 6.02 | 6.31 | 6.53 | 6.80 |
| 13.22 | 4.38 | 4.71 | 4.94 | 5.42 | 5.87 | 5.93 | 6.19 | 6.28 | 6.35 | 6.79 | 6.88 |
| 13.42 | 4.43 | 4.74 | 5.15 | 5.36 | 5.80 | 5.87 | 6.23 | 6.42 | 6.56 | 6.82 | 6.83 |
| 13.50 | 4.14 | 4.77 | 5.01 | 5.26 | 5.51 | 5.84 | 6.07 | 6.11 | 6.42 | 6.50 | 6.70 |
| 13.59 | 4.35 | 4.99 | 5.00 | 5.37 | 5.43 | 5.76 | 5.85 | 6.24 | 6.42 | 6.36 | 6.60 |
| 13.68 | 4.31 | 4.87 | 5.03 | 5.37 | 5.78 | 5.96 | 6.06 | 6.19 | 6.81 | 6.73 | 6.90 |
| 13.78 | 4.47 | 4.86 | 4.96 | 5.35 | 5.47 | 5.71 | 6.05 | 6.21 | 6.39 | 6.79 | 6.70 |
| 13.88 | 4.59 | 4.91 | 5.13 | 5.63 | 5.58 | 6.09 | 6.07 | 6.02 | 6.81 | 6.81 | 7.01 |
| 14.00 | 4.48 | 4.85 | 5.03 | 5.37 | 5.44 | 6.01 | 6.19 | 6.14 | 6.49 | 6.76 | 6.74 |
| 14.12 | 4.48 | 4.76 | 5.06 | 5.22 | 5.75 | 6.06 | 6.18 | 6.35 | 6.67 | 6.91 | 6.80 |
| 14.25 | 4.28 | 4.89 | 5.16 | 5.24 | 5.45 | 5.86 | 5.97 | 6.18 | 6.17 | 6.73 | 6.78 |
| 14.40 | 4.49 | 4.90 | 5.11 | 5.36 | 5.77 | 5.88 | 6.30 | 6.51 | 6.64 | 6.84 | 6.85 |
| 14.55 | 4.55 | 5.02 | 5.09 | 5.40 | 5.72 | 5.71 | 6.24 | 6.14 | 6.55 | 6.68 | 6.82 |
| 14.72 | 4.65 | 5.07 | 5.11 | 5.58 | 5.83 | 6.43 | 6.50 | 6.36 | 6.90 | 7.02 | 7.20 |
| 14.90 | 4.08 | 4.48 | 4.84 | 4.75 | 5.40 | 5.63 | 5.80 | 5.93 | 6.18 | 6.33 | 6.55 |
| 15.09 | 4.38 | 4.60 | 5.05 | 5.17 | 5.40 | 5.72 | 6.09 | 6.14 | 6.45 | 6.65 | 6.77 |
| 15.30 | 4.29 | 4.64 | 4.91 | 5.42 | 5.59 | 5.76 | 6.11 | 6.21 | 6.53 | 6.62 | 6.70 |
| 15.53 | 4.73 | 5.27 | 5.60 | 5.72 | 5.85 | 6.32 | 6.56 | 6.79 | 6.85 | 7.06 | 7.32 |
| 15.77 | 4.52 | 5.08 | 5.20 | 5.60 | 5.81 | 6.01 | 6.45 | 6.39 | 6.73 | 6.85 | 6.97 |
| 16.04 | 4.49 | 4.95 | 5.19 | 5.64 | 5.81 | 5.98 | 6.40 | 6.58 | 6.79 | 6.91 | 6.96 |
| 16.32 | 4.38 | 4.65 | 5.17 | 5.35 | 5.66 | 5.84 | 6.00 | 6.07 | 6.38 | 6.76 | 6.72 |
| 16.63 | 4.59 | 4.74 | 4.98 | 5.49 | 5.78 | 5.84 | 6.27 | 6.19 | 6.52 | 6.65 | 6.81 |

|        |      |      |      |      |      |      |      |      |      |      |      |
|--------|------|------|------|------|------|------|------|------|------|------|------|
| 16.96  | 4.30 | 4.80 | 5.04 | 5.54 | 5.54 | 5.90 | 6.31 | 6.23 | 6.60 | 6.81 | 6.90 |
| 17.31  | 4.36 | 4.80 | 5.25 | 5.29 | 5.43 | 5.79 | 6.14 | 6.25 | 6.41 | 6.77 | 6.89 |
| 17.70  | 4.50 | 5.01 | 5.31 | 5.59 | 5.93 | 6.15 | 6.13 | 6.33 | 6.67 | 6.85 | 6.78 |
| 18.11  | 4.18 | 4.58 | 5.21 | 5.41 | 5.56 | 5.95 | 6.24 | 6.35 | 6.35 | 6.81 | 6.73 |
| 18.56  | 4.46 | 4.63 | 4.72 | 5.30 | 5.49 | 5.72 | 6.09 | 6.15 | 6.45 | 6.28 | 6.62 |
| 19.04  | 4.51 | 4.52 | 5.09 | 5.38 | 5.50 | 5.68 | 6.09 | 6.15 | 6.61 | 6.67 | 6.69 |
| 19.56  | 4.35 | 5.06 | 4.95 | 5.33 | 5.48 | 5.81 | 5.96 | 6.10 | 6.30 | 6.64 | 6.65 |
| 20.12  | 4.45 | 4.89 | 5.28 | 5.43 | 5.72 | 5.87 | 6.17 | 6.26 | 6.60 | 6.88 | 7.00 |
| 20.72  | 4.62 | 5.02 | 5.07 | 5.45 | 5.65 | 6.06 | 6.17 | 6.33 | 6.52 | 6.77 | 6.72 |
| 21.37  | 4.47 | 4.98 | 5.13 | 5.53 | 5.63 | 5.80 | 6.18 | 6.16 | 6.50 | 6.83 | 6.66 |
| 22.08  | 4.91 | 5.20 | 5.61 | 5.65 | 6.32 | 6.30 | 6.63 | 6.70 | 6.98 | 7.18 | 7.29 |
| 22.84  | 4.27 | 4.92 | 5.29 | 5.42 | 5.58 | 5.86 | 6.24 | 6.21 | 6.59 | 6.61 | 6.95 |
| 23.65  | 4.30 | 4.84 | 5.18 | 5.24 | 5.74 | 6.01 | 6.33 | 6.11 | 6.43 | 6.80 | 6.79 |
| 24.54  | 4.43 | 4.69 | 5.06 | 5.41 | 5.62 | 5.80 | 6.11 | 6.30 | 6.40 | 6.70 | 6.98 |
| 25.49  | 4.61 | 5.16 | 5.24 | 5.49 | 5.82 | 6.03 | 6.27 | 6.23 | 6.58 | 6.74 | 6.83 |
| 26.51  | 4.21 | 4.87 | 5.35 | 5.48 | 5.56 | 5.84 | 6.30 | 6.32 | 6.51 | 6.67 | 6.69 |
| 27.62  | 4.44 | 4.95 | 5.17 | 5.57 | 5.82 | 6.04 | 6.28 | 6.49 | 6.66 | 6.72 | 6.80 |
| 28.81  | 4.41 | 5.13 | 5.32 | 5.68 | 5.92 | 6.01 | 6.38 | 6.43 | 6.66 | 6.84 | 6.98 |
| 30.10  | 4.43 | 4.84 | 5.15 | 5.30 | 5.57 | 5.82 | 6.02 | 6.30 | 6.38 | 6.66 | 6.82 |
| 31.49  | 4.40 | 4.58 | 5.05 | 5.34 | 5.50 | 5.58 | 6.07 | 5.92 | 6.20 | 6.61 | 6.68 |
| 32.98  | 4.22 | 4.75 | 5.08 | 5.27 | 5.44 | 5.62 | 5.83 | 5.89 | 6.32 | 6.45 | 6.52 |
| 34.60  | 4.68 | 5.00 | 5.09 | 5.30 | 5.87 | 5.90 | 6.17 | 6.43 | 6.47 | 6.60 | 6.75 |
| 36.34  | 4.74 | 5.15 | 5.23 | 5.59 | 5.77 | 6.13 | 6.13 | 6.20 | 6.57 | 6.74 | 6.78 |
| 38.21  | 4.57 | 4.74 | 4.99 | 5.15 | 5.67 | 5.41 | 5.94 | 6.08 | 6.45 | 6.51 | 6.61 |
| 40.24  | 4.53 | 5.06 | 5.27 | 5.42 | 5.75 | 5.90 | 5.98 | 6.41 | 6.62 | 6.60 | 6.81 |
| 42.42  | 4.36 | 4.80 | 4.89 | 5.28 | 5.33 | 5.66 | 5.83 | 6.14 | 6.30 | 6.46 | 6.57 |
| 44.78  | 4.62 | 4.89 | 5.28 | 5.52 | 5.86 | 5.88 | 6.29 | 6.51 | 6.44 | 6.63 | 6.79 |
| 47.32  | 4.79 | 5.03 | 5.23 | 5.54 | 5.90 | 6.07 | 6.37 | 6.24 | 6.40 | 6.71 | 6.61 |
| 50.06  | 4.93 | 5.30 | 5.54 | 5.89 | 6.19 | 6.08 | 6.45 | 6.61 | 6.63 | 6.83 | 6.92 |
| 53.01  | 5.07 | 5.21 | 5.61 | 5.72 | 6.03 | 6.29 | 6.52 | 6.51 | 6.83 | 6.92 | 7.13 |
| 56.20  | 4.63 | 5.20 | 5.32 | 5.83 | 5.77 | 6.10 | 6.26 | 6.45 | 6.69 | 6.89 | 6.93 |
| 59.64  | 4.64 | 4.90 | 5.43 | 5.63 | 5.67 | 5.84 | 6.44 | 6.29 | 6.57 | 6.74 | 6.60 |
| 63.34  | 4.69 | 5.10 | 5.64 | 5.64 | 5.96 | 5.94 | 6.30 | 6.38 | 6.60 | 6.64 | 6.73 |
| 67.34  | 4.51 | 5.10 | 5.26 | 5.49 | 5.83 | 6.00 | 6.38 | 6.21 | 6.49 | 6.51 | 6.74 |
| 71.65  | 4.84 | 5.09 | 5.54 | 5.90 | 5.96 | 6.29 | 6.42 | 6.43 | 6.72 | 6.83 | 6.65 |
| 76.30  | 5.02 | 5.39 | 5.36 | 5.76 | 5.89 | 6.24 | 6.45 | 6.40 | 6.68 | 6.83 | 6.64 |
| 81.32  | 4.96 | 5.42 | 5.79 | 5.79 | 6.06 | 6.14 | 6.61 | 6.31 | 6.55 | 6.81 | 6.86 |
| 86.73  | 4.89 | 5.36 | 5.57 | 5.75 | 5.92 | 6.21 | 6.56 | 6.48 | 6.82 | 7.07 | 7.08 |
| 92.56  | 4.90 | 5.16 | 5.44 | 5.97 | 6.03 | 6.26 | 6.33 | 6.53 | 6.46 | 6.90 | 6.79 |
| 98.85  | 4.93 | 5.40 | 5.79 | 6.00 | 6.02 | 6.17 | 6.61 | 6.44 | 6.73 | 6.85 | 6.81 |
| 105.64 | 4.99 | 5.65 | 5.61 | 5.95 | 5.93 | 6.19 | 6.36 | 6.65 | 6.78 | 6.68 | 6.95 |
| 112.96 | 5.19 | 5.38 | 5.46 | 6.04 | 6.23 | 6.27 | 6.48 | 6.73 | 6.80 | 6.79 | 7.04 |
| 120.85 | 4.93 | 5.28 | 5.79 | 5.84 | 6.03 | 6.02 | 6.18 | 6.42 | 6.35 | 6.68 | 6.69 |
| 129.36 | 5.46 | 5.77 | 6.12 | 6.44 | 6.85 | 6.76 | 6.97 | 6.97 | 7.18 | 7.27 | 7.26 |
| 138.55 | 5.18 | 5.74 | 5.85 | 6.03 | 6.22 | 6.31 | 6.45 | 6.69 | 6.68 | 6.76 | 6.60 |
| 148.45 | 5.51 | 5.85 | 6.15 | 6.45 | 6.46 | 6.60 | 6.66 | 6.91 | 7.13 | 7.31 | 7.12 |
| 159.13 | 5.61 | 6.05 | 6.31 | 6.23 | 6.48 | 6.60 | 6.80 | 6.90 | 6.96 | 7.04 | 6.95 |
| 170.65 | 5.40 | 5.94 | 6.07 | 6.23 | 6.64 | 6.68 | 6.73 | 6.96 | 7.09 | 7.19 | 7.27 |
| 183.07 | 5.57 | 5.94 | 6.26 | 6.63 | 6.33 | 6.63 | 6.95 | 6.88 | 7.06 | 6.94 | 7.02 |
| 196.47 | 5.87 | 5.98 | 5.92 | 6.52 | 6.67 | 6.90 | 7.04 | 6.97 | 7.03 | 7.32 | 7.22 |

|         |      |      |      |      |      |      |      |      |      |      |      |
|---------|------|------|------|------|------|------|------|------|------|------|------|
| 210.91  | 5.72 | 5.99 | 6.26 | 6.54 | 6.72 | 6.74 | 6.90 | 7.00 | 6.89 | 7.06 | 6.94 |
| 226.50  | 5.54 | 5.73 | 6.02 | 6.28 | 6.27 | 6.44 | 6.66 | 6.70 | 6.79 | 6.73 | 6.77 |
| 243.31  | 5.88 | 6.20 | 6.37 | 6.65 | 6.63 | 6.85 | 6.94 | 6.98 | 6.92 | 7.08 | 7.12 |
| 261.43  | 6.20 | 6.29 | 6.40 | 6.72 | 7.07 | 6.99 | 7.00 | 7.24 | 7.38 | 7.30 | 7.29 |
| 280.98  | 6.11 | 6.44 | 6.46 | 6.66 | 6.66 | 7.07 | 7.30 | 6.96 | 7.24 | 7.10 | 7.23 |
| 302.07  | 5.99 | 6.41 | 6.57 | 6.84 | 6.82 | 6.97 | 7.14 | 7.13 | 7.13 | 7.25 | 7.22 |
| 324.81  | 6.22 | 6.32 | 6.61 | 6.90 | 7.17 | 7.14 | 7.29 | 7.41 | 7.21 | 7.50 | 7.49 |
| 349.33  | 6.26 | 6.56 | 6.74 | 6.93 | 6.99 | 7.09 | 7.35 | 7.32 | 7.26 | 7.12 | 7.14 |
| 375.79  | 6.33 | 6.81 | 6.68 | 6.91 | 7.05 | 7.09 | 7.43 | 7.41 | 7.46 | 7.35 | 7.45 |
| 404.31  | 6.33 | 6.59 | 6.93 | 6.85 | 7.23 | 7.19 | 7.35 | 7.28 | 7.23 | 7.31 | 7.09 |
| 435.08  | 6.69 | 7.07 | 7.11 | 7.52 | 7.48 | 7.56 | 7.91 | 7.71 | 7.95 | 7.81 | 7.69 |
| 468.27  | 6.78 | 7.24 | 7.37 | 7.42 | 7.78 | 7.79 | 7.70 | 7.89 | 7.80 | 7.93 | 7.61 |
| 504.06  | 6.50 | 7.05 | 7.15 | 7.22 | 7.27 | 7.51 | 7.58 | 7.40 | 7.58 | 7.37 | 7.46 |
| 542.66  | 6.98 | 7.42 | 7.35 | 7.78 | 7.57 | 7.69 | 7.88 | 7.93 | 7.90 | 7.83 | 7.68 |
| 584.29  | 6.74 | 7.12 | 7.46 | 7.51 | 7.55 | 7.71 | 7.63 | 7.63 | 7.46 | 7.69 | 7.63 |
| 629.18  | 6.76 | 7.17 | 7.34 | 7.47 | 7.64 | 7.61 | 7.37 | 7.88 | 7.54 | 7.52 | 7.45 |
| 677.61  | 6.65 | 7.03 | 7.26 | 7.30 | 7.45 | 7.53 | 7.78 | 7.66 | 7.77 | 7.81 | 7.65 |
| 729.83  | 6.58 | 6.81 | 7.25 | 7.22 | 7.26 | 7.41 | 7.56 | 7.42 | 7.56 | 7.34 | 7.11 |
| 786.16  | 6.82 | 7.20 | 7.06 | 7.34 | 7.49 | 7.66 | 7.66 | 7.39 | 7.57 | 7.54 | 7.24 |
| 846.90  | 6.98 | 7.32 | 7.34 | 7.74 | 7.73 | 7.58 | 7.74 | 7.67 | 7.78 | 7.72 | 7.34 |
| 912.42  | 6.88 | 6.93 | 7.07 | 7.13 | 7.44 | 7.49 | 7.67 | 7.44 | 7.62 | 7.40 | 7.25 |
| 983.08  | 7.09 | 7.39 | 7.42 | 7.67 | 7.64 | 7.62 | 7.67 | 7.70 | 7.69 | 7.41 | 7.39 |
| 1059.29 | 6.98 | 7.40 | 7.40 | 7.59 | 7.39 | 7.59 | 7.70 | 7.51 | 7.58 | 7.29 | 7.20 |
| 1141.48 | 6.93 | 7.34 | 7.45 | 7.69 | 7.81 | 7.87 | 7.74 | 7.72 | 7.72 | 7.63 | 7.35 |
| 1230.13 | 7.06 | 7.38 | 7.58 | 7.58 | 7.66 | 7.70 | 7.74 | 7.86 | 7.69 | 7.66 | 7.42 |
| 1325.73 | 7.26 | 7.57 | 7.84 | 7.91 | 7.88 | 8.05 | 7.91 | 7.78 | 7.83 | 7.67 | 7.71 |
| 1428.84 | 7.14 | 7.56 | 7.61 | 7.85 | 8.18 | 8.06 | 8.06 | 7.90 | 7.82 | 7.95 | 7.59 |
| 1540.05 | 7.33 | 7.35 | 7.80 | 7.87 | 7.93 | 8.12 | 8.11 | 7.91 | 7.92 | 7.87 | 7.58 |
| 1659.99 | 7.10 | 7.33 | 7.52 | 7.59 | 7.61 | 7.56 | 7.90 | 7.85 | 7.62 | 7.51 | 7.44 |
| 1789.34 | 7.17 | 7.85 | 7.84 | 7.99 | 7.93 | 7.83 | 8.13 | 7.99 | 7.84 | 8.07 | 7.78 |
| 1928.85 | 6.93 | 7.30 | 7.39 | 7.79 | 7.77 | 7.68 | 7.62 | 7.66 | 7.69 | 7.52 | 7.56 |
| 2079.31 | 7.17 | 7.67 | 7.43 | 7.57 | 7.74 | 7.58 | 7.89 | 7.69 | 7.74 | 7.55 | 7.38 |
| 2241.59 | 7.08 | 7.52 | 7.73 | 7.66 | 7.87 | 7.92 | 8.00 | 7.89 | 7.77 | 7.81 | 7.51 |
| 2416.60 | 7.35 | 7.38 | 7.63 | 7.86 | 7.86 | 7.87 | 8.05 | 7.88 | 7.74 | 7.63 | 7.64 |
| 2605.36 | 6.92 | 7.29 | 7.39 | 7.49 | 7.52 | 7.77 | 7.74 | 7.61 | 7.64 | 7.42 | 7.17 |
| 2808.94 | 7.03 | 7.30 | 7.51 | 7.89 | 7.77 | 7.73 | 7.87 | 7.87 | 7.72 | 7.92 | 7.45 |
| 3028.50 | 6.68 | 7.33 | 7.43 | 7.34 | 7.45 | 7.32 | 7.73 | 7.38 | 7.42 | 7.57 | 7.26 |
| 3265.30 | 6.80 | 7.09 | 7.27 | 7.37 | 7.38 | 7.65 | 7.63 | 7.55 | 7.51 | 7.48 | 7.33 |
| 3520.69 | 6.93 | 7.29 | 7.45 | 7.44 | 7.54 | 7.69 | 7.82 | 7.55 | 7.38 | 7.39 | 7.31 |
| 3796.13 | 6.82 | 7.10 | 7.12 | 7.46 | 7.39 | 7.45 | 7.46 | 7.46 | 7.45 | 7.42 | 7.09 |

| Wavelength (nm) \ Time (ps) | 381.08 | 382.51 | 383.93 | 385.36 | 386.78 | 388.20 | 389.63 | 391.05 | 392.48 | 393.90 | 395.32 |
|-----------------------------|--------|--------|--------|--------|--------|--------|--------|--------|--------|--------|--------|
| -3.78                       | -0.14  | -0.22  | -0.03  | -0.22  | -0.14  | -0.11  | -0.09  | 0.00   | 0.05   | 0.00   | -0.19  |
| -3.28                       | -0.04  | -0.12  | -0.03  | -0.03  | 0.00   | -0.04  | 0.04   | -0.07  | -0.11  | -0.07  | 0.05   |
| -2.78                       | -0.10  | -0.34  | -0.17  | -0.18  | -0.08  | -0.19  | -0.32  | -0.25  | -0.37  | -0.29  | -0.18  |
| -2.28                       | -0.01  | 0.05   | -0.19  | -0.02  | -0.11  | 0.08   | 0.07   | 0.03   | -0.05  | -0.15  | -0.01  |
| -1.78                       | -0.03  | 0.05   | 0.00   | 0.10   | 0.07   | 0.14   | 0.11   | 0.17   | 0.10   | 0.23   | 0.11   |



|       |        |        |        |        |        |        |        |        |        |        |        |
|-------|--------|--------|--------|--------|--------|--------|--------|--------|--------|--------|--------|
| -1.28 | 0.28   | 0.43   | 0.34   | 0.16   | 0.18   | 0.13   | 0.11   | 0.14   | 0.38   | 0.38   | 0.36   |
| -0.78 | 0.15   | 0.23   | 0.05   | 0.09   | 0.11   | 0.05   | 0.15   | -0.01  | -0.02  | -0.10  | -0.08  |
| -0.28 | -0.12  | -0.08  | 0.03   | 0.10   | -0.02  | -0.07  | -0.07  | 0.00   | 0.02   | 0.00   | -0.05  |
| -0.18 | 0.07   | 0.01   | -0.24  | 0.01   | 0.01   | -0.14  | 0.08   | -0.05  | 0.17   | 0.22   | -0.01  |
| -0.08 | -0.12  | 0.11   | 0.02   | 0.00   | 0.01   | 0.13   | 0.04   | 0.08   | 0.05   | 0.19   | -0.02  |
| 0.02  | -0.07  | -0.02  | -0.03  | -0.28  | 0.08   | -0.18  | -0.24  | -0.08  | -0.22  | -0.17  | -0.26  |
| 0.12  | -0.23  | -0.09  | -0.23  | 0.04   | 0.09   | 0.01   | 0.16   | 0.15   | 0.03   | 0.06   | -0.11  |
| 0.22  | -0.27  | -0.01  | 0.00   | -0.09  | -0.18  | -0.01  | 0.07   | -0.01  | -0.03  | 0.01   | -0.16  |
| 0.27  | -0.12  | 0.26   | 0.19   | -0.10  | 0.05   | 0.04   | 0.02   | 0.02   | 0.08   | 0.13   | -0.04  |
| 0.32  | -0.24  | -0.25  | -0.25  | -0.42  | -0.29  | -0.30  | -0.25  | -0.07  | -0.22  | -0.21  | -0.19  |
| 0.37  | 0.24   | 0.29   | 0.12   | 0.05   | 0.09   | 0.10   | -0.04  | 0.25   | 0.29   | 0.34   | 0.10   |
| 0.42  | 0.00   | 0.15   | 0.35   | 0.42   | 0.12   | 0.22   | 0.25   | 0.19   | 0.22   | 0.18   | 0.10   |
| 0.47  | 0.18   | 0.39   | 0.10   | 0.05   | 0.16   | 0.22   | 0.15   | 0.11   | 0.18   | 0.35   | 0.24   |
| 0.52  | -0.18  | 0.08   | 0.02   | 0.09   | 0.05   | -0.05  | 0.08   | 0.05   | -0.06  | -0.06  | -0.04  |
| 0.57  | -0.32  | 0.00   | -0.05  | -0.22  | -0.19  | -0.22  | -0.06  | 0.17   | 0.03   | 0.07   | -0.15  |
| 0.62  | 0.08   | -0.03  | 0.03   | -0.01  | -0.04  | -0.03  | -0.06  | -0.09  | 0.08   | 0.05   | 0.04   |
| 0.67  | 0.43   | -0.09  | -0.03  | 0.14   | 0.21   | 0.08   | 0.09   | 0.38   | 0.18   | 0.24   | 0.14   |
| 0.72  | -9.15  | -2.84  | -0.40  | 0.27   | 0.30   | 0.34   | 0.30   | 0.34   | 0.28   | 0.37   | 0.37   |
| 0.77  | -16.25 | -39.67 | -48.16 | -43.11 | -29.98 | -15.53 | -5.26  | -0.71  | 0.92   | 1.44   | 0.54   |
| 0.82  | 127.08 | 132.51 | 118.81 | 89.73  | 53.45  | 18.61  | -5.58  | -16.42 | -16.68 | -14.87 | -17.66 |
| 0.87  | -39.99 | -33.38 | -11.70 | 20.72  | 56.39  | 87.15  | 107.17 | 112.52 | 106.83 | 93.70  | 73.98  |
| 0.92  | 10.40  | 10.94  | 10.41  | 2.46   | -14.88 | -36.40 | -53.06 | -56.62 | -44.01 | -15.00 | 29.05  |
| 0.97  | 11.19  | 11.47  | 12.10  | 12.83  | 13.67  | 13.78  | 13.39  | 13.80  | 14.24  | 11.90  | 2.64   |
| 1.02  | 11.17  | 11.44  | 11.37  | 11.42  | 11.43  | 12.15  | 12.40  | 12.60  | 13.08  | 13.58  | 14.34  |
| 1.07  | 10.39  | 10.73  | 11.34  | 11.46  | 11.74  | 11.71  | 12.18  | 12.54  | 12.74  | 12.89  | 13.31  |
| 1.12  | 10.11  | 10.65  | 10.64  | 10.89  | 11.09  | 11.61  | 11.95  | 11.91  | 12.47  | 12.74  | 12.88  |
| 1.17  | 9.46   | 9.89   | 10.33  | 10.53  | 10.65  | 10.97  | 11.14  | 11.06  | 11.48  | 11.90  | 11.98  |
| 1.22  | 9.95   | 9.82   | 10.29  | 10.52  | 10.75  | 10.71  | 11.09  | 11.45  | 11.59  | 11.86  | 12.02  |
| 1.27  | 9.39   | 9.54   | 9.81   | 9.87   | 10.41  | 10.82  | 10.92  | 10.86  | 11.05  | 11.43  | 11.42  |
| 1.32  | 8.95   | 9.31   | 9.72   | 9.81   | 9.86   | 10.03  | 10.35  | 10.53  | 10.66  | 11.02  | 11.26  |
| 1.37  | 8.84   | 9.37   | 9.21   | 9.39   | 9.84   | 9.93   | 10.05  | 10.24  | 10.48  | 10.90  | 10.83  |
| 1.42  | 9.17   | 9.65   | 9.80   | 9.72   | 9.79   | 10.15  | 10.19  | 10.46  | 10.72  | 10.99  | 11.15  |
| 1.47  | 8.91   | 9.02   | 9.46   | 9.58   | 9.95   | 9.75   | 10.31  | 10.33  | 10.54  | 10.65  | 10.79  |
| 1.52  | 9.15   | 8.99   | 9.17   | 9.50   | 9.82   | 9.58   | 9.94   | 9.99   | 10.35  | 10.52  | 10.59  |
| 1.57  | 8.98   | 9.13   | 9.32   | 9.37   | 9.56   | 9.62   | 10.03  | 10.23  | 10.25  | 10.45  | 10.73  |
| 1.62  | 8.37   | 8.75   | 9.03   | 9.17   | 9.36   | 9.50   | 9.57   | 9.83   | 10.05  | 10.17  | 10.28  |
| 1.67  | 8.57   | 8.69   | 8.72   | 8.92   | 9.25   | 9.50   | 9.72   | 9.72   | 9.94   | 10.23  | 10.19  |
| 1.72  | 8.20   | 8.65   | 9.02   | 8.92   | 9.23   | 9.26   | 9.50   | 9.61   | 9.82   | 10.00  | 10.14  |
| 1.77  | 8.59   | 8.69   | 9.05   | 9.09   | 9.18   | 9.40   | 9.48   | 9.77   | 10.01  | 10.12  | 10.16  |
| 1.82  | 8.32   | 8.56   | 8.43   | 8.57   | 8.90   | 9.01   | 9.21   | 9.38   | 9.34   | 9.61   | 9.67   |
| 1.87  | 8.50   | 8.57   | 9.13   | 9.34   | 9.22   | 9.24   | 9.35   | 9.56   | 9.70   | 9.87   | 10.13  |
| 1.92  | 8.26   | 8.43   | 8.61   | 8.92   | 9.11   | 9.19   | 9.43   | 9.57   | 9.84   | 10.04  | 10.06  |
| 1.97  | 7.94   | 8.31   | 8.53   | 8.57   | 8.85   | 8.88   | 9.08   | 9.25   | 9.36   | 9.67   | 9.70   |
| 2.02  | 7.67   | 7.85   | 7.94   | 8.20   | 8.66   | 8.55   | 8.93   | 8.97   | 9.20   | 9.19   | 9.25   |
| 2.07  | 8.34   | 8.50   | 8.40   | 8.80   | 9.08   | 9.14   | 9.21   | 9.35   | 9.53   | 9.85   | 10.01  |
| 2.12  | 8.18   | 8.51   | 8.52   | 8.88   | 8.95   | 9.02   | 9.18   | 9.39   | 9.51   | 9.70   | 9.88   |
| 2.17  | 8.14   | 8.23   | 8.17   | 8.70   | 8.70   | 8.78   | 8.94   | 9.24   | 9.44   | 9.64   | 9.51   |
| 2.22  | 8.31   | 8.49   | 8.52   | 8.66   | 8.70   | 8.98   | 9.30   | 9.31   | 9.58   | 9.78   | 9.74   |
| 2.27  | 8.25   | 8.56   | 8.68   | 8.75   | 8.91   | 8.84   | 9.21   | 9.17   | 9.32   | 9.54   | 9.68   |
| 2.32  | 8.00   | 8.16   | 8.26   | 8.31   | 8.67   | 8.67   | 8.68   | 8.82   | 9.15   | 9.01   | 9.09   |

|      |      |      |      |      |      |      |      |      |      |      |      |
|------|------|------|------|------|------|------|------|------|------|------|------|
| 2.37 | 7.91 | 8.37 | 8.40 | 8.55 | 8.81 | 8.89 | 9.21 | 9.06 | 9.43 | 9.75 | 9.72 |
| 2.42 | 8.11 | 8.15 | 8.61 | 8.43 | 8.72 | 8.86 | 8.93 | 8.99 | 9.27 | 9.16 | 9.30 |
| 2.47 | 8.48 | 8.31 | 8.28 | 8.42 | 8.89 | 8.90 | 9.23 | 9.21 | 9.36 | 9.68 | 9.73 |
| 2.52 | 8.13 | 8.35 | 8.59 | 8.55 | 8.71 | 9.02 | 9.16 | 9.43 | 9.44 | 9.56 | 9.80 |
| 2.57 | 8.11 | 8.16 | 8.57 | 8.65 | 8.84 | 8.97 | 9.02 | 9.26 | 9.23 | 9.69 | 9.61 |
| 2.62 | 8.35 | 8.43 | 8.45 | 8.63 | 8.83 | 8.74 | 8.81 | 9.13 | 9.34 | 9.44 | 9.47 |
| 2.67 | 7.97 | 8.06 | 8.13 | 8.35 | 8.63 | 8.61 | 8.65 | 8.94 | 9.09 | 9.22 | 9.30 |
| 2.72 | 7.86 | 7.98 | 8.24 | 8.30 | 8.53 | 8.63 | 8.72 | 8.82 | 9.12 | 9.34 | 9.40 |
| 2.77 | 7.81 | 7.94 | 8.27 | 8.25 | 8.29 | 8.46 | 8.89 | 8.97 | 9.09 | 9.29 | 9.21 |
| 2.82 | 7.88 | 8.13 | 8.21 | 8.41 | 8.72 | 8.52 | 8.76 | 8.86 | 9.08 | 9.30 | 9.13 |
| 2.87 | 7.92 | 8.11 | 8.14 | 8.26 | 8.51 | 8.64 | 8.77 | 8.81 | 9.03 | 9.17 | 9.31 |
| 2.92 | 7.93 | 8.21 | 8.34 | 8.44 | 8.59 | 8.83 | 8.77 | 9.00 | 9.05 | 9.32 | 9.33 |
| 2.97 | 7.68 | 8.04 | 8.13 | 8.34 | 8.59 | 8.35 | 8.65 | 8.69 | 8.78 | 8.90 | 9.02 |
| 3.02 | 7.97 | 8.22 | 8.30 | 8.56 | 8.66 | 8.82 | 8.94 | 9.06 | 9.26 | 9.47 | 9.31 |
| 3.07 | 7.81 | 8.20 | 8.13 | 8.30 | 8.49 | 8.54 | 8.71 | 8.78 | 8.99 | 9.15 | 9.21 |
| 3.12 | 7.68 | 8.01 | 8.03 | 8.08 | 8.28 | 8.44 | 8.54 | 8.48 | 8.94 | 8.98 | 9.07 |
| 3.17 | 7.75 | 7.88 | 8.21 | 8.21 | 8.30 | 8.32 | 8.65 | 8.63 | 8.96 | 8.93 | 9.05 |
| 3.22 | 7.94 | 8.02 | 8.29 | 8.51 | 8.60 | 8.57 | 8.71 | 9.13 | 9.26 | 9.42 | 9.41 |
| 3.42 | 8.01 | 8.10 | 8.40 | 8.57 | 8.50 | 8.44 | 8.72 | 8.73 | 8.88 | 9.16 | 9.00 |
| 3.62 | 8.30 | 8.31 | 8.64 | 8.40 | 8.69 | 8.93 | 8.94 | 9.14 | 9.16 | 9.35 | 9.34 |
| 3.82 | 7.82 | 8.02 | 8.08 | 8.43 | 8.64 | 8.65 | 8.78 | 8.94 | 9.06 | 9.34 | 9.19 |
| 4.02 | 8.01 | 8.36 | 8.19 | 8.56 | 8.60 | 8.66 | 8.98 | 9.16 | 9.22 | 9.30 | 9.32 |
| 4.22 | 7.49 | 7.87 | 7.94 | 8.13 | 8.30 | 8.39 | 8.56 | 8.65 | 8.61 | 8.93 | 9.00 |
| 4.42 | 7.89 | 8.06 | 8.10 | 8.19 | 8.41 | 8.61 | 8.77 | 8.96 | 8.88 | 9.18 | 9.17 |
| 4.62 | 7.53 | 7.90 | 7.93 | 8.05 | 8.11 | 8.34 | 8.32 | 8.63 | 8.63 | 8.72 | 8.86 |
| 4.82 | 7.71 | 7.85 | 8.01 | 8.07 | 8.34 | 8.35 | 8.59 | 8.56 | 8.90 | 8.93 | 8.98 |
| 5.02 | 7.79 | 8.11 | 8.18 | 8.13 | 8.29 | 8.50 | 8.48 | 8.76 | 8.86 | 8.91 | 9.01 |
| 5.22 | 7.55 | 7.69 | 7.86 | 8.14 | 8.06 | 8.20 | 8.54 | 8.42 | 8.70 | 8.89 | 8.93 |
| 5.42 | 7.46 | 7.72 | 7.86 | 8.13 | 8.30 | 8.36 | 8.57 | 8.64 | 8.82 | 8.90 | 8.98 |
| 5.62 | 7.70 | 7.97 | 7.97 | 8.04 | 8.23 | 8.03 | 8.47 | 8.46 | 8.68 | 8.83 | 8.80 |
| 5.82 | 7.63 | 7.97 | 7.79 | 7.84 | 8.12 | 8.21 | 8.43 | 8.57 | 8.61 | 9.01 | 8.78 |
| 6.02 | 7.17 | 7.57 | 7.54 | 7.69 | 7.83 | 7.72 | 8.19 | 8.34 | 8.49 | 8.56 | 8.60 |
| 6.22 | 7.82 | 7.71 | 7.67 | 7.89 | 8.07 | 8.26 | 8.38 | 8.50 | 8.61 | 8.79 | 8.87 |
| 6.42 | 7.54 | 7.88 | 8.03 | 8.01 | 8.30 | 8.44 | 8.48 | 8.60 | 8.70 | 8.98 | 8.86 |
| 6.62 | 7.40 | 7.85 | 7.82 | 7.88 | 8.21 | 8.18 | 8.23 | 8.54 | 8.47 | 8.73 | 8.73 |
| 6.82 | 7.40 | 7.58 | 7.70 | 7.97 | 7.85 | 7.97 | 8.13 | 8.29 | 8.43 | 8.58 | 8.72 |
| 7.02 | 7.75 | 7.71 | 7.89 | 7.90 | 8.07 | 8.06 | 8.49 | 8.85 | 8.71 | 8.86 | 8.84 |
| 7.22 | 7.48 | 7.69 | 7.67 | 7.81 | 7.89 | 8.06 | 8.23 | 8.36 | 8.44 | 8.66 | 8.78 |
| 7.42 | 7.87 | 8.17 | 8.08 | 8.15 | 8.27 | 8.48 | 8.70 | 8.66 | 8.85 | 8.99 | 9.04 |
| 7.62 | 7.42 | 7.51 | 7.80 | 7.77 | 7.95 | 8.06 | 8.31 | 8.50 | 8.42 | 8.47 | 8.40 |
| 7.82 | 7.36 | 7.62 | 7.69 | 7.84 | 8.02 | 7.96 | 8.21 | 8.22 | 8.38 | 8.59 | 8.58 |
| 8.02 | 7.26 | 7.46 | 7.54 | 7.52 | 7.65 | 7.76 | 7.99 | 8.12 | 8.15 | 8.46 | 8.57 |
| 8.22 | 7.39 | 7.53 | 7.57 | 7.92 | 8.10 | 7.87 | 8.19 | 8.11 | 8.30 | 8.34 | 8.60 |
| 8.42 | 7.40 | 7.43 | 7.51 | 7.99 | 8.11 | 8.08 | 8.54 | 8.33 | 8.54 | 8.83 | 8.79 |
| 8.62 | 7.17 | 7.46 | 7.42 | 7.62 | 7.78 | 7.77 | 7.86 | 8.05 | 8.21 | 8.38 | 8.37 |
| 8.82 | 7.18 | 7.73 | 7.62 | 7.68 | 8.04 | 7.95 | 8.06 | 8.16 | 8.22 | 8.57 | 8.41 |
| 9.02 | 7.26 | 7.45 | 7.48 | 7.78 | 7.82 | 7.93 | 8.14 | 8.08 | 8.34 | 8.62 | 8.57 |
| 9.22 | 7.17 | 7.53 | 7.75 | 7.62 | 7.97 | 7.97 | 8.11 | 8.37 | 8.37 | 8.58 | 8.55 |
| 9.42 | 7.01 | 7.29 | 7.39 | 7.51 | 7.74 | 7.73 | 7.92 | 8.04 | 8.06 | 8.33 | 8.41 |
| 9.62 | 7.42 | 7.63 | 7.70 | 7.73 | 7.98 | 8.20 | 8.11 | 8.31 | 8.24 | 8.46 | 8.63 |

|       |      |      |      |      |      |      |      |      |      |      |      |
|-------|------|------|------|------|------|------|------|------|------|------|------|
| 9.82  | 7.19 | 7.40 | 7.50 | 7.48 | 7.66 | 7.71 | 8.02 | 7.86 | 8.21 | 8.57 | 8.44 |
| 10.02 | 7.02 | 7.30 | 7.49 | 7.55 | 7.66 | 7.65 | 7.78 | 7.88 | 7.99 | 8.30 | 8.24 |
| 10.22 | 7.17 | 7.31 | 7.49 | 7.48 | 7.56 | 7.66 | 7.81 | 7.78 | 8.05 | 8.27 | 8.19 |
| 10.42 | 7.01 | 7.29 | 7.32 | 7.81 | 7.82 | 7.98 | 8.12 | 8.09 | 8.22 | 8.49 | 8.36 |
| 10.62 | 7.00 | 7.27 | 7.41 | 7.64 | 7.70 | 7.91 | 7.92 | 7.98 | 8.38 | 8.52 | 8.59 |
| 10.82 | 7.06 | 7.16 | 7.30 | 7.45 | 7.66 | 7.68 | 7.82 | 8.07 | 8.28 | 8.45 | 8.51 |
| 11.02 | 7.20 | 7.42 | 7.35 | 7.53 | 7.78 | 7.85 | 7.99 | 8.07 | 8.11 | 8.28 | 8.41 |
| 11.22 | 7.08 | 7.25 | 7.31 | 7.40 | 7.52 | 7.53 | 7.79 | 7.88 | 8.09 | 8.10 | 8.13 |
| 11.42 | 6.74 | 6.99 | 7.17 | 7.09 | 7.24 | 7.18 | 7.44 | 7.68 | 7.78 | 7.90 | 7.83 |
| 11.62 | 7.23 | 7.64 | 7.58 | 7.62 | 7.77 | 7.93 | 8.21 | 8.23 | 8.40 | 8.45 | 8.50 |
| 11.82 | 6.99 | 7.33 | 7.47 | 7.67 | 7.65 | 7.72 | 7.93 | 7.95 | 8.07 | 8.34 | 8.31 |
| 12.02 | 6.80 | 7.07 | 7.49 | 7.32 | 7.42 | 7.58 | 7.72 | 7.90 | 8.06 | 8.25 | 8.27 |
| 12.22 | 7.06 | 7.20 | 7.47 | 7.69 | 7.45 | 7.81 | 8.14 | 8.16 | 8.36 | 8.48 | 8.48 |
| 12.42 | 7.18 | 7.45 | 7.43 | 7.63 | 7.64 | 7.77 | 7.94 | 8.16 | 8.17 | 8.26 | 8.45 |
| 12.62 | 6.93 | 7.07 | 7.15 | 7.31 | 7.50 | 7.46 | 7.58 | 7.80 | 7.93 | 8.03 | 7.99 |
| 12.82 | 6.71 | 6.87 | 7.00 | 7.14 | 7.31 | 7.22 | 7.35 | 7.59 | 7.67 | 7.89 | 7.98 |
| 13.02 | 7.11 | 6.97 | 7.23 | 7.58 | 7.68 | 7.68 | 8.00 | 8.07 | 8.25 | 8.27 | 8.33 |
| 13.22 | 6.81 | 7.29 | 7.31 | 7.48 | 7.74 | 7.61 | 8.05 | 8.01 | 8.01 | 8.24 | 8.35 |
| 13.42 | 7.26 | 7.45 | 7.48 | 7.58 | 7.66 | 7.77 | 7.99 | 7.82 | 8.13 | 8.48 | 8.37 |
| 13.50 | 6.93 | 7.11 | 7.20 | 7.18 | 7.31 | 7.53 | 7.63 | 7.82 | 8.01 | 8.07 | 8.07 |
| 13.59 | 6.95 | 7.30 | 7.12 | 7.46 | 7.44 | 7.57 | 7.84 | 7.87 | 7.98 | 8.12 | 8.14 |
| 13.68 | 7.14 | 7.22 | 7.17 | 7.30 | 7.33 | 7.57 | 7.66 | 7.74 | 7.78 | 8.06 | 7.98 |
| 13.78 | 7.00 | 7.13 | 7.10 | 7.46 | 7.53 | 7.70 | 7.74 | 7.82 | 7.94 | 7.99 | 8.12 |
| 13.88 | 6.97 | 7.29 | 7.57 | 7.58 | 7.73 | 7.52 | 7.69 | 7.95 | 8.03 | 8.31 | 8.20 |
| 14.00 | 6.99 | 7.33 | 7.35 | 7.51 | 7.55 | 7.58 | 7.80 | 7.99 | 8.01 | 8.36 | 8.12 |
| 14.12 | 6.97 | 7.42 | 7.40 | 7.34 | 7.40 | 7.65 | 7.93 | 8.01 | 8.20 | 8.39 | 8.35 |
| 14.25 | 7.07 | 7.35 | 7.42 | 7.55 | 7.50 | 7.62 | 7.81 | 7.80 | 8.14 | 8.17 | 8.18 |
| 14.40 | 7.13 | 7.22 | 7.42 | 7.64 | 7.65 | 7.90 | 8.12 | 8.17 | 8.32 | 8.50 | 8.54 |
| 14.55 | 7.05 | 7.15 | 7.40 | 7.38 | 7.50 | 7.59 | 7.66 | 7.75 | 8.01 | 8.15 | 8.22 |
| 14.72 | 7.35 | 7.47 | 7.71 | 7.58 | 7.87 | 7.97 | 8.11 | 8.04 | 8.33 | 8.45 | 8.55 |
| 14.90 | 6.65 | 6.76 | 7.09 | 6.91 | 7.25 | 7.17 | 7.43 | 7.49 | 7.68 | 7.92 | 7.88 |
| 15.09 | 6.89 | 6.99 | 7.21 | 7.28 | 7.45 | 7.44 | 7.50 | 7.76 | 7.97 | 8.02 | 8.06 |
| 15.30 | 6.77 | 7.12 | 7.24 | 7.28 | 7.34 | 7.51 | 7.83 | 7.71 | 7.83 | 7.99 | 8.12 |
| 15.53 | 7.17 | 7.49 | 7.58 | 7.70 | 7.79 | 7.75 | 7.76 | 8.00 | 8.28 | 8.53 | 8.50 |
| 15.77 | 7.12 | 7.23 | 7.25 | 7.41 | 7.60 | 7.62 | 7.78 | 8.12 | 8.03 | 8.53 | 8.23 |
| 16.04 | 7.05 | 7.23 | 7.46 | 7.53 | 7.59 | 7.60 | 7.83 | 8.04 | 8.29 | 8.30 | 8.43 |
| 16.32 | 6.80 | 7.05 | 7.09 | 7.28 | 7.29 | 7.27 | 7.59 | 7.77 | 7.84 | 7.98 | 7.99 |
| 16.63 | 6.98 | 7.08 | 7.34 | 7.36 | 7.52 | 7.65 | 7.65 | 7.83 | 8.06 | 8.15 | 8.27 |
| 16.96 | 7.21 | 7.42 | 7.33 | 7.39 | 7.56 | 7.55 | 7.76 | 8.00 | 8.22 | 8.19 | 8.25 |
| 17.31 | 6.67 | 7.24 | 7.24 | 7.36 | 7.45 | 7.62 | 7.61 | 7.80 | 8.02 | 8.16 | 8.20 |
| 17.70 | 6.93 | 7.27 | 7.28 | 7.60 | 7.77 | 7.46 | 7.84 | 7.97 | 8.08 | 8.21 | 8.28 |
| 18.11 | 6.86 | 7.22 | 7.20 | 7.13 | 7.30 | 7.61 | 7.61 | 7.60 | 7.95 | 7.88 | 8.09 |
| 18.56 | 6.88 | 6.94 | 7.19 | 7.00 | 7.30 | 7.57 | 7.46 | 7.69 | 7.93 | 8.06 | 8.11 |
| 19.04 | 6.89 | 6.99 | 7.31 | 7.31 | 7.40 | 7.48 | 7.51 | 7.67 | 7.92 | 7.75 | 7.83 |
| 19.56 | 6.89 | 6.86 | 7.02 | 7.24 | 7.37 | 7.43 | 7.43 | 7.87 | 7.89 | 8.02 | 7.98 |
| 20.12 | 7.03 | 7.27 | 7.31 | 7.38 | 7.40 | 7.49 | 7.80 | 7.79 | 8.00 | 8.25 | 8.11 |
| 20.72 | 6.86 | 7.30 | 7.34 | 7.41 | 7.64 | 7.78 | 7.85 | 8.00 | 8.08 | 8.26 | 8.43 |
| 21.37 | 6.97 | 7.07 | 7.45 | 7.44 | 7.55 | 7.57 | 7.61 | 7.82 | 7.93 | 8.16 | 7.99 |
| 22.08 | 7.51 | 7.60 | 7.66 | 7.80 | 7.90 | 8.10 | 8.30 | 8.43 | 8.41 | 8.69 | 8.78 |
| 22.84 | 7.16 | 7.24 | 7.20 | 7.29 | 7.33 | 7.57 | 7.82 | 7.82 | 7.98 | 8.06 | 8.08 |

|        |      |      |      |      |      |      |      |      |      |      |      |
|--------|------|------|------|------|------|------|------|------|------|------|------|
| 23.65  | 6.95 | 7.10 | 7.08 | 7.58 | 7.38 | 7.58 | 7.74 | 7.88 | 7.89 | 8.17 | 8.10 |
| 24.54  | 7.06 | 6.95 | 7.20 | 7.37 | 7.22 | 7.28 | 7.56 | 7.81 | 7.87 | 8.03 | 8.10 |
| 25.49  | 7.10 | 7.16 | 7.48 | 7.44 | 7.37 | 7.63 | 7.87 | 7.96 | 8.06 | 8.21 | 8.23 |
| 26.51  | 6.86 | 7.02 | 6.86 | 7.18 | 7.35 | 7.24 | 7.51 | 7.53 | 7.83 | 7.84 | 7.91 |
| 27.62  | 7.16 | 7.18 | 7.11 | 7.32 | 7.40 | 7.57 | 7.70 | 7.70 | 7.93 | 8.09 | 8.03 |
| 28.81  | 7.30 | 7.32 | 7.52 | 7.20 | 7.40 | 7.61 | 7.78 | 7.90 | 7.94 | 8.29 | 8.16 |
| 30.10  | 6.84 | 6.79 | 7.09 | 7.14 | 7.19 | 7.32 | 7.46 | 7.62 | 7.63 | 7.88 | 7.72 |
| 31.49  | 6.73 | 6.89 | 7.03 | 7.10 | 7.21 | 7.50 | 7.54 | 7.70 | 7.81 | 7.70 | 7.80 |
| 32.98  | 6.67 | 6.89 | 6.76 | 6.96 | 7.03 | 7.39 | 7.14 | 7.55 | 7.53 | 7.73 | 7.74 |
| 34.60  | 7.09 | 7.08 | 7.09 | 7.18 | 7.29 | 7.42 | 7.40 | 7.51 | 7.79 | 7.93 | 7.92 |
| 36.34  | 6.94 | 7.21 | 7.40 | 7.31 | 7.53 | 7.40 | 7.46 | 7.58 | 7.77 | 7.97 | 8.06 |
| 38.21  | 6.58 | 6.88 | 6.96 | 7.14 | 7.09 | 7.24 | 7.51 | 7.19 | 7.65 | 7.59 | 7.50 |
| 40.24  | 7.00 | 7.17 | 7.10 | 7.39 | 7.57 | 7.55 | 7.81 | 7.83 | 7.90 | 8.16 | 8.27 |
| 42.42  | 6.57 | 6.80 | 6.87 | 7.02 | 6.99 | 7.17 | 7.29 | 7.45 | 7.48 | 7.62 | 7.69 |
| 44.78  | 6.77 | 6.83 | 6.99 | 7.04 | 7.24 | 7.27 | 7.34 | 7.54 | 7.57 | 7.75 | 7.78 |
| 47.32  | 6.85 | 7.06 | 7.12 | 7.25 | 7.31 | 7.29 | 7.51 | 7.63 | 7.78 | 8.00 | 7.88 |
| 50.06  | 7.07 | 7.20 | 7.11 | 7.33 | 7.13 | 7.54 | 7.76 | 7.85 | 8.03 | 8.07 | 8.02 |
| 53.01  | 7.14 | 7.25 | 7.29 | 7.31 | 7.51 | 7.21 | 7.65 | 7.59 | 7.95 | 8.07 | 7.97 |
| 56.20  | 7.10 | 7.08 | 7.19 | 7.27 | 7.35 | 7.28 | 7.23 | 7.60 | 7.66 | 7.81 | 7.76 |
| 59.64  | 7.07 | 7.07 | 7.12 | 7.09 | 7.21 | 7.30 | 7.18 | 7.58 | 7.54 | 7.52 | 7.63 |
| 63.34  | 6.91 | 6.76 | 7.14 | 7.02 | 7.09 | 7.19 | 7.31 | 7.47 | 7.59 | 7.76 | 7.71 |
| 67.34  | 6.78 | 6.79 | 6.81 | 6.95 | 7.31 | 7.08 | 7.22 | 7.21 | 7.40 | 7.52 | 7.43 |
| 71.65  | 6.98 | 7.19 | 7.18 | 7.36 | 7.37 | 7.10 | 7.33 | 7.42 | 7.54 | 7.72 | 7.57 |
| 76.30  | 6.97 | 6.94 | 7.06 | 7.17 | 7.45 | 7.18 | 7.44 | 7.52 | 7.65 | 7.82 | 7.79 |
| 81.32  | 6.92 | 7.13 | 7.08 | 7.06 | 7.24 | 7.40 | 7.33 | 7.43 | 7.56 | 7.66 | 7.71 |
| 86.73  | 7.12 | 7.15 | 7.31 | 7.25 | 7.42 | 7.40 | 7.56 | 7.88 | 7.81 | 7.96 | 7.86 |
| 92.56  | 6.75 | 7.12 | 7.23 | 7.15 | 7.16 | 7.29 | 7.32 | 7.35 | 7.42 | 7.45 | 7.57 |
| 98.85  | 6.74 | 6.83 | 6.87 | 6.82 | 7.29 | 6.95 | 7.18 | 7.14 | 7.41 | 7.43 | 7.46 |
| 105.64 | 6.99 | 7.11 | 7.17 | 7.06 | 7.30 | 7.05 | 7.35 | 7.40 | 7.66 | 7.73 | 7.56 |
| 112.96 | 6.95 | 6.95 | 7.19 | 7.37 | 7.45 | 7.48 | 7.46 | 7.60 | 7.66 | 7.83 | 7.85 |
| 120.85 | 6.83 | 6.88 | 6.90 | 6.89 | 7.05 | 7.05 | 7.05 | 7.13 | 7.13 | 7.09 | 7.12 |
| 129.36 | 7.40 | 7.52 | 7.33 | 7.52 | 7.35 | 7.70 | 7.70 | 7.86 | 7.68 | 7.69 | 7.65 |
| 138.55 | 6.88 | 7.07 | 7.32 | 6.96 | 7.27 | 7.28 | 7.25 | 7.40 | 7.52 | 7.68 | 7.52 |
| 148.45 | 7.03 | 7.23 | 7.26 | 7.29 | 7.16 | 7.26 | 7.58 | 7.55 | 7.72 | 7.84 | 7.72 |
| 159.13 | 7.31 | 7.04 | 7.27 | 6.95 | 7.14 | 7.08 | 7.18 | 7.37 | 7.37 | 7.51 | 7.57 |
| 170.65 | 7.23 | 7.26 | 7.19 | 7.34 | 7.12 | 7.19 | 7.27 | 7.23 | 7.30 | 7.45 | 7.31 |
| 183.07 | 7.07 | 7.20 | 7.12 | 7.34 | 7.32 | 7.31 | 7.23 | 7.36 | 7.36 | 7.34 | 7.38 |
| 196.47 | 7.02 | 7.23 | 7.17 | 7.13 | 7.17 | 7.04 | 7.21 | 7.07 | 7.49 | 7.52 | 7.37 |
| 210.91 | 7.23 | 7.19 | 7.28 | 7.20 | 7.28 | 7.02 | 7.23 | 7.19 | 7.15 | 7.33 | 7.22 |
| 226.50 | 6.88 | 6.92 | 6.98 | 6.98 | 6.88 | 7.15 | 7.01 | 7.01 | 7.26 | 7.16 | 7.14 |
| 243.31 | 6.89 | 7.16 | 7.07 | 7.08 | 6.92 | 7.23 | 7.37 | 7.28 | 7.19 | 7.47 | 7.36 |
| 261.43 | 7.36 | 7.39 | 7.38 | 7.19 | 7.17 | 7.35 | 7.53 | 7.33 | 7.30 | 7.36 | 7.38 |
| 280.98 | 7.26 | 7.16 | 7.18 | 7.16 | 7.14 | 7.38 | 7.33 | 7.21 | 7.32 | 7.35 | 7.15 |
| 302.07 | 7.05 | 7.34 | 7.16 | 7.01 | 7.05 | 7.03 | 7.02 | 7.04 | 6.95 | 6.93 | 7.02 |
| 324.81 | 7.22 | 7.28 | 7.22 | 7.17 | 7.14 | 7.14 | 7.02 | 7.15 | 7.22 | 7.24 | 6.95 |
| 349.33 | 7.14 | 7.25 | 6.90 | 6.96 | 7.01 | 6.97 | 6.83 | 7.03 | 7.06 | 6.95 | 6.94 |
| 375.79 | 7.09 | 7.50 | 7.23 | 7.12 | 7.14 | 6.97 | 7.16 | 7.10 | 7.12 | 7.20 | 6.98 |
| 404.31 | 6.87 | 7.14 | 7.11 | 7.02 | 7.09 | 6.81 | 6.87 | 7.05 | 7.07 | 6.96 | 6.94 |
| 435.08 | 7.45 | 7.55 | 7.55 | 7.49 | 7.44 | 7.38 | 7.43 | 7.48 | 7.47 | 7.42 | 7.31 |
| 468.27 | 7.58 | 7.68 | 7.49 | 7.33 | 7.36 | 7.33 | 7.37 | 7.32 | 7.40 | 7.36 | 7.17 |

|         |      |      |      |      |      |      |      |      |      |      |      |
|---------|------|------|------|------|------|------|------|------|------|------|------|
| 504.06  | 7.39 | 7.28 | 7.26 | 7.17 | 7.13 | 6.99 | 7.25 | 6.94 | 7.03 | 7.08 | 7.21 |
| 542.66  | 7.54 | 7.37 | 7.38 | 7.34 | 7.11 | 7.20 | 7.17 | 7.10 | 7.13 | 7.24 | 6.97 |
| 584.29  | 7.36 | 7.36 | 7.19 | 7.12 | 7.16 | 6.96 | 7.06 | 7.03 | 6.97 | 7.04 | 7.17 |
| 629.18  | 7.37 | 7.32 | 7.15 | 7.09 | 7.05 | 6.96 | 7.01 | 7.01 | 7.05 | 7.08 | 6.89 |
| 677.61  | 7.27 | 7.57 | 7.51 | 7.33 | 7.25 | 7.23 | 7.14 | 7.19 | 6.99 | 7.23 | 7.13 |
| 729.83  | 7.00 | 7.06 | 6.94 | 6.78 | 6.79 | 6.68 | 6.74 | 6.55 | 6.56 | 6.65 | 6.54 |
| 786.16  | 7.37 | 7.32 | 7.08 | 7.02 | 6.79 | 6.87 | 6.79 | 6.89 | 6.75 | 6.70 | 6.65 |
| 846.90  | 7.37 | 7.35 | 7.27 | 7.14 | 6.91 | 6.77 | 6.75 | 6.77 | 6.77 | 6.70 | 6.65 |
| 912.42  | 7.20 | 7.43 | 7.08 | 6.86 | 6.72 | 6.65 | 6.82 | 6.70 | 6.60 | 6.57 | 6.60 |
| 983.08  | 7.20 | 7.45 | 6.99 | 7.12 | 7.08 | 6.95 | 6.89 | 7.00 | 6.73 | 6.75 | 6.55 |
| 1059.29 | 7.31 | 7.27 | 7.04 | 6.82 | 6.84 | 6.84 | 6.85 | 6.68 | 6.56 | 6.66 | 6.51 |
| 1141.48 | 7.27 | 7.38 | 6.99 | 6.94 | 6.89 | 6.79 | 6.85 | 6.67 | 6.73 | 6.77 | 6.46 |
| 1230.13 | 7.48 | 7.52 | 7.46 | 7.18 | 7.04 | 7.06 | 7.00 | 6.87 | 6.92 | 6.87 | 6.81 |
| 1325.73 | 7.63 | 7.45 | 7.27 | 7.22 | 7.13 | 7.15 | 7.12 | 7.13 | 7.06 | 7.19 | 6.92 |
| 1428.84 | 7.43 | 7.43 | 7.22 | 7.25 | 7.13 | 7.03 | 6.95 | 6.85 | 6.97 | 6.86 | 6.82 |
| 1540.05 | 7.53 | 7.60 | 7.47 | 7.23 | 7.11 | 7.00 | 7.21 | 7.04 | 7.04 | 6.92 | 6.89 |
| 1659.99 | 7.25 | 7.36 | 7.09 | 6.95 | 6.97 | 6.77 | 6.72 | 6.80 | 6.85 | 6.76 | 6.71 |
| 1789.34 | 7.62 | 7.54 | 7.21 | 7.13 | 7.03 | 7.03 | 7.04 | 6.84 | 6.84 | 6.85 | 6.62 |
| 1928.85 | 7.22 | 7.25 | 7.06 | 7.26 | 7.05 | 6.63 | 6.72 | 6.83 | 6.55 | 6.69 | 6.60 |
| 2079.31 | 7.24 | 7.43 | 7.11 | 7.11 | 6.86 | 6.69 | 6.73 | 6.70 | 6.77 | 6.74 | 6.64 |
| 2241.59 | 7.46 | 7.21 | 7.08 | 7.21 | 6.79 | 6.81 | 6.98 | 6.81 | 6.77 | 6.73 | 6.67 |
| 2416.60 | 7.11 | 7.26 | 7.35 | 7.01 | 7.10 | 7.02 | 6.88 | 6.82 | 6.88 | 6.77 | 6.84 |
| 2605.36 | 7.31 | 7.08 | 6.94 | 7.00 | 7.01 | 6.85 | 6.61 | 6.68 | 6.77 | 6.80 | 6.74 |
| 2808.94 | 7.45 | 7.26 | 6.92 | 7.18 | 7.03 | 6.73 | 6.65 | 6.79 | 6.76 | 6.77 | 6.63 |
| 3028.50 | 7.05 | 7.12 | 6.79 | 6.88 | 6.52 | 6.57 | 6.45 | 6.40 | 6.56 | 6.60 | 6.39 |
| 3265.30 | 7.34 | 7.38 | 7.09 | 7.00 | 7.01 | 6.88 | 7.01 | 6.94 | 6.88 | 6.82 | 6.76 |
| 3520.69 | 7.18 | 7.06 | 7.17 | 7.00 | 6.75 | 6.88 | 6.82 | 6.71 | 6.68 | 6.84 | 6.59 |
| 3796.13 | 7.08 | 6.88 | 6.84 | 6.60 | 6.79 | 6.81 | 6.71 | 6.51 | 6.57 | 6.58 | 6.58 |

| Wavelength (nm) \ Time (ps) | 396.75 | 398.17 | 399.60 | 401.02 | 402.44 | 403.87 | 405.29 | 406.72 | 408.14 | 409.56 | 410.99 |
|-----------------------------|--------|--------|--------|--------|--------|--------|--------|--------|--------|--------|--------|
| -3.78                       | -0.08  | -0.03  | -0.02  | -0.06  | -0.11  | -0.03  | -0.30  | -0.13  | -0.09  | -0.21  | -0.19  |
| -3.28                       | -0.06  | 0.03   | 0.15   | 0.09   | -0.10  | -0.30  | -0.06  | 0.07   | 0.00   | 0.13   | -0.22  |
| -2.78                       | -0.23  | -0.17  | -0.32  | -0.04  | -0.20  | -0.20  | -0.11  | -0.14  | -0.11  | 0.14   | 0.07   |
| -2.28                       | 0.04   | 0.03   | -0.04  | -0.09  | -0.05  | 0.25   | 0.05   | -0.11  | -0.02  | 0.14   | 0.06   |
| -1.78                       | 0.20   | 0.22   | 0.00   | 0.15   | 0.16   | -0.05  | 0.17   | 0.18   | 0.03   | -0.12  | 0.17   |
| -1.28                       | 0.26   | 0.20   | 0.19   | 0.18   | 0.18   | 0.35   | 0.22   | 0.12   | 0.08   | 0.12   | 0.18   |
| -0.78                       | -0.08  | -0.16  | 0.02   | -0.23  | -0.02  | 0.14   | 0.01   | -0.01  | 0.11   | 0.01   | 0.00   |
| -0.28                       | -0.06  | -0.12  | 0.01   | 0.00   | 0.14   | -0.17  | 0.01   | 0.01   | 0.01   | -0.21  | -0.07  |
| -0.18                       | -0.03  | -0.15  | -0.15  | 0.10   | -0.10  | -0.05  | -0.02  | -0.07  | 0.12   | 0.09   | 0.08   |
| -0.08                       | 0.06   | 0.05   | 0.15   | 0.13   | -0.03  | -0.11  | 0.11   | 0.15   | 0.00   | -0.05  | -0.12  |
| 0.02                        | -0.12  | -0.19  | -0.22  | -0.04  | -0.18  | -0.02  | -0.06  | -0.09  | -0.05  | 0.01   | 0.11   |
| 0.12                        | -0.01  | -0.08  | 0.01   | 0.10   | -0.33  | -0.12  | -0.06  | -0.19  | -0.08  | 0.14   | -0.12  |
| 0.22                        | -0.05  | -0.07  | -0.20  | -0.05  | -0.13  | -0.12  | 0.01   | -0.24  | -0.05  | -0.27  | -0.40  |
| 0.27                        | 0.04   | 0.05   | 0.02   | -0.01  | 0.08   | 0.24   | 0.14   | -0.10  | 0.05   | 0.07   | 0.03   |
| 0.32                        | -0.22  | -0.10  | -0.33  | -0.23  | -0.21  | -0.23  | -0.18  | -0.34  | -0.38  | -0.35  | -0.31  |
| 0.37                        | 0.18   | 0.21   | 0.12   | 0.29   | -0.09  | 0.29   | 0.13   | -0.01  | -0.01  | 0.21   | -0.02  |
| 0.42                        | 0.26   | 0.12   | 0.20   | 0.01   | -0.04  | -0.01  | 0.08   | 0.13   | -0.27  | 0.05   | -0.01  |

|      |        |        |        |        |        |        |        |        |        |        |        |
|------|--------|--------|--------|--------|--------|--------|--------|--------|--------|--------|--------|
| 0.47 | 0.29   | 0.17   | 0.20   | 0.45   | 0.29   | 0.51   | 0.27   | 0.24   | 0.28   | 0.16   | 0.17   |
| 0.52 | 0.01   | 0.11   | -0.01  | 0.14   | -0.11  | 0.25   | 0.13   | 0.08   | -0.04  | 0.09   | 0.07   |
| 0.57 | -0.04  | -0.02  | -0.07  | -0.12  | -0.07  | -0.10  | 0.12   | -0.19  | -0.39  | -0.12  | -0.20  |
| 0.62 | -0.14  | -0.04  | -0.07  | -0.02  | -0.13  | 0.12   | -0.01  | -0.27  | -0.07  | -0.12  | -0.22  |
| 0.67 | 0.17   | 0.40   | 0.15   | 0.12   | 0.14   | 0.16   | 0.22   | 0.08   | 0.04   | -0.04  | -0.16  |
| 0.72 | 0.31   | 0.29   | 0.22   | 0.32   | 0.21   | 0.10   | 0.27   | 0.25   | 0.33   | 0.19   | 0.10   |
| 0.77 | -0.94  | -0.71  | 0.74   | 0.64   | -0.03  | 0.30   | 0.19   | 0.05   | 0.06   | 0.19   | 0.14   |
| 0.82 | -24.41 | -27.57 | -19.51 | -3.42  | 4.93   | 2.32   | -0.61  | -0.14  | 0.10   | -0.15  | -0.08  |
| 0.87 | 44.51  | 1.34   | -46.86 | -79.41 | -81.99 | -58.15 | -27.23 | -7.27  | -0.16  | 0.36   | 0.05   |
| 0.92 | 83.11  | 135.14 | 167.92 | 167.00 | 134.80 | 88.39  | 43.74  | 11.49  | -5.11  | -9.00  | -5.04  |
| 0.97 | -12.30 | -26.60 | -31.38 | -21.02 | 3.05   | 35.21  | 66.58  | 92.09  | 109.45 | 119.21 | 122.66 |
| 1.02 | 14.96  | 14.55  | 13.77  | 14.89  | 15.65  | 10.16  | -6.85  | -34.92 | -65.20 | -88.91 | -99.40 |
| 1.07 | 13.56  | 13.60  | 13.14  | 12.70  | 12.11  | 12.87  | 14.59  | 16.58  | 17.52  | 16.33  | 14.97  |
| 1.12 | 12.78  | 12.57  | 12.73  | 12.88  | 12.91  | 12.85  | 12.79  | 12.47  | 12.61  | 13.06  | 13.26  |
| 1.17 | 12.27  | 12.22  | 11.92  | 11.87  | 12.09  | 12.67  | 12.93  | 12.64  | 11.84  | 11.16  | 11.11  |
| 1.22 | 12.30  | 12.82  | 12.73  | 12.51  | 11.62  | 11.58  | 11.68  | 11.85  | 12.41  | 12.77  | 12.18  |
| 1.27 | 11.37  | 11.24  | 11.44  | 11.87  | 11.82  | 11.58  | 10.92  | 10.52  | 10.64  | 11.31  | 12.15  |
| 1.32 | 11.74  | 11.41  | 10.83  | 10.57  | 10.51  | 10.96  | 11.42  | 11.43  | 10.84  | 10.43  | 10.04  |
| 1.37 | 10.89  | 11.01  | 11.34  | 11.41  | 10.78  | 10.66  | 10.53  | 10.21  | 10.74  | 11.02  | 11.02  |
| 1.42 | 11.17  | 11.03  | 10.79  | 10.99  | 11.13  | 11.12  | 10.73  | 10.33  | 10.03  | 10.10  | 10.35  |
| 1.47 | 11.07  | 11.10  | 10.69  | 10.47  | 9.89   | 10.16  | 10.01  | 10.81  | 10.57  | 10.02  | 9.71   |
| 1.52 | 10.76  | 10.82  | 10.95  | 10.87  | 10.43  | 10.10  | 9.82   | 9.82   | 10.28  | 10.53  | 10.58  |
| 1.57 | 10.81  | 10.41  | 10.22  | 10.19  | 10.50  | 10.81  | 10.49  | 9.98   | 9.55   | 9.12   | 9.52   |
| 1.62 | 10.49  | 10.75  | 10.55  | 10.24  | 9.43   | 9.61   | 9.70   | 9.64   | 9.94   | 9.64   | 8.91   |
| 1.67 | 10.15  | 10.07  | 10.23  | 10.42  | 10.16  | 9.72   | 9.49   | 9.25   | 9.24   | 9.61   | 9.90   |
| 1.72 | 10.32  | 10.16  | 9.87   | 9.74   | 9.52   | 9.94   | 9.70   | 9.65   | 9.37   | 8.98   | 8.92   |
| 1.77 | 10.28  | 10.37  | 10.28  | 10.12  | 9.77   | 9.55   | 9.05   | 9.47   | 9.67   | 9.68   | 9.39   |
| 1.82 | 9.77   | 9.55   | 9.36   | 9.68   | 9.54   | 9.54   | 9.19   | 8.48   | 8.41   | 8.53   | 9.04   |
| 1.87 | 10.37  | 10.30  | 10.01  | 9.85   | 9.41   | 9.78   | 9.56   | 9.79   | 9.29   | 9.07   | 8.96   |
| 1.92 | 10.09  | 10.02  | 10.05  | 10.00  | 9.81   | 9.26   | 9.16   | 9.01   | 9.03   | 9.20   | 9.10   |
| 1.97 | 9.78   | 9.46   | 9.34   | 9.33   | 9.28   | 9.35   | 9.25   | 8.56   | 8.34   | 8.22   | 8.31   |
| 2.02 | 9.41   | 9.48   | 9.45   | 9.02   | 8.94   | 8.77   | 8.63   | 8.69   | 8.88   | 8.90   | 8.86   |
| 2.07 | 9.96   | 9.88   | 9.82   | 9.80   | 9.36   | 9.15   | 9.12   | 8.69   | 8.92   | 8.99   | 9.03   |
| 2.12 | 9.94   | 9.83   | 9.38   | 9.38   | 9.32   | 9.53   | 9.25   | 9.14   | 8.66   | 8.68   | 8.44   |
| 2.17 | 9.65   | 9.68   | 9.55   | 9.52   | 8.97   | 8.77   | 8.83   | 8.91   | 8.84   | 8.62   | 8.62   |
| 2.22 | 9.92   | 9.53   | 9.50   | 9.48   | 9.45   | 9.47   | 8.98   | 8.59   | 8.39   | 8.61   | 8.72   |
| 2.27 | 9.76   | 9.81   | 9.62   | 9.15   | 9.08   | 9.24   | 9.26   | 8.96   | 8.85   | 8.55   | 8.42   |
| 2.32 | 9.31   | 9.23   | 8.98   | 9.08   | 8.81   | 8.72   | 8.19   | 8.31   | 8.34   | 8.52   | 8.28   |
| 2.37 | 9.88   | 9.68   | 9.46   | 9.27   | 9.35   | 9.34   | 9.02   | 8.60   | 8.43   | 8.33   | 8.39   |
| 2.42 | 9.68   | 9.66   | 9.28   | 9.10   | 9.01   | 8.95   | 9.18   | 8.68   | 8.83   | 8.58   | 8.39   |
| 2.47 | 9.77   | 9.73   | 9.74   | 9.65   | 9.31   | 9.23   | 8.68   | 8.73   | 8.70   | 8.68   | 8.61   |
| 2.52 | 9.93   | 9.75   | 9.37   | 9.30   | 9.18   | 9.32   | 9.12   | 8.79   | 8.57   | 8.35   | 8.36   |
| 2.57 | 9.77   | 9.67   | 9.72   | 9.43   | 9.20   | 8.77   | 8.70   | 9.12   | 8.85   | 8.75   | 8.44   |
| 2.62 | 9.47   | 9.49   | 9.60   | 9.20   | 9.12   | 9.12   | 8.61   | 8.25   | 8.28   | 8.45   | 8.59   |
| 2.67 | 9.39   | 9.23   | 9.16   | 9.15   | 8.73   | 9.11   | 8.70   | 8.53   | 8.23   | 8.13   | 7.91   |
| 2.72 | 9.40   | 9.53   | 9.36   | 9.17   | 8.91   | 8.64   | 8.52   | 8.29   | 8.33   | 8.41   | 8.14   |
| 2.77 | 9.31   | 9.41   | 9.16   | 9.04   | 8.91   | 8.84   | 8.66   | 8.52   | 8.07   | 8.10   | 8.15   |
| 2.82 | 9.25   | 9.41   | 9.05   | 9.12   | 8.88   | 8.59   | 8.55   | 8.70   | 8.47   | 8.30   | 8.16   |
| 2.87 | 9.45   | 9.29   | 9.16   | 9.17   | 8.75   | 8.70   | 8.56   | 8.06   | 8.29   | 8.30   | 8.06   |
| 2.92 | 9.46   | 9.27   | 9.02   | 9.08   | 8.59   | 8.94   | 8.66   | 8.32   | 8.31   | 8.09   | 8.10   |

|       |      |      |      |      |      |      |      |      |      |      |      |
|-------|------|------|------|------|------|------|------|------|------|------|------|
| 2.97  | 9.08 | 9.14 | 8.85 | 8.83 | 8.52 | 8.47 | 8.42 | 8.18 | 8.13 | 8.38 | 8.02 |
| 3.02  | 9.57 | 9.50 | 9.50 | 9.31 | 9.03 | 8.98 | 8.71 | 8.31 | 8.14 | 8.48 | 8.24 |
| 3.07  | 9.42 | 9.23 | 9.06 | 8.98 | 8.86 | 8.70 | 8.64 | 8.36 | 8.27 | 8.16 | 8.00 |
| 3.12  | 9.10 | 9.17 | 9.03 | 8.85 | 8.59 | 8.57 | 8.55 | 8.33 | 8.09 | 8.09 | 7.96 |
| 3.17  | 9.18 | 8.99 | 8.96 | 8.96 | 8.79 | 8.65 | 8.43 | 8.26 | 8.43 | 8.17 | 8.13 |
| 3.22  | 9.55 | 9.51 | 9.23 | 9.10 | 8.93 | 8.68 | 8.65 | 8.54 | 8.48 | 8.25 | 8.07 |
| 3.42  | 9.22 | 9.19 | 8.95 | 8.92 | 8.69 | 8.59 | 8.39 | 8.13 | 8.11 | 8.24 | 8.13 |
| 3.62  | 9.52 | 9.47 | 9.30 | 8.96 | 9.11 | 8.75 | 8.82 | 8.40 | 8.43 | 8.29 | 8.10 |
| 3.82  | 9.22 | 9.31 | 9.22 | 9.00 | 8.70 | 8.47 | 8.29 | 8.20 | 8.14 | 8.03 | 7.98 |
| 4.02  | 9.42 | 9.32 | 9.15 | 9.06 | 8.76 | 8.74 | 8.60 | 8.39 | 8.24 | 7.90 | 7.91 |
| 4.22  | 8.97 | 8.98 | 8.94 | 8.63 | 8.57 | 8.37 | 8.26 | 7.98 | 7.99 | 7.94 | 7.87 |
| 4.42  | 9.32 | 9.10 | 8.93 | 8.70 | 8.50 | 8.61 | 8.55 | 8.10 | 8.10 | 7.96 | 7.89 |
| 4.62  | 8.92 | 9.07 | 8.75 | 8.80 | 8.29 | 8.35 | 8.29 | 7.88 | 8.08 | 8.12 | 7.91 |
| 4.82  | 9.28 | 8.93 | 9.05 | 8.72 | 8.42 | 8.52 | 8.17 | 8.11 | 8.10 | 7.75 | 7.70 |
| 5.02  | 8.96 | 8.97 | 8.95 | 8.75 | 8.82 | 8.58 | 8.47 | 8.13 | 7.98 | 8.25 | 7.89 |
| 5.22  | 9.02 | 9.06 | 8.85 | 8.70 | 8.22 | 8.56 | 8.22 | 7.91 | 7.74 | 7.76 | 7.71 |
| 5.42  | 9.01 | 8.98 | 8.71 | 8.70 | 8.45 | 8.47 | 8.19 | 7.88 | 7.89 | 7.93 | 7.66 |
| 5.62  | 8.94 | 8.96 | 8.78 | 8.71 | 8.60 | 8.33 | 8.21 | 8.09 | 7.77 | 7.76 | 7.64 |
| 5.82  | 9.17 | 8.85 | 8.70 | 8.48 | 8.24 | 8.42 | 8.20 | 7.82 | 7.64 | 7.77 | 7.60 |
| 6.02  | 8.75 | 8.70 | 8.53 | 8.27 | 7.97 | 7.92 | 7.97 | 7.71 | 7.53 | 7.68 | 7.48 |
| 6.22  | 9.03 | 8.90 | 8.77 | 8.62 | 8.24 | 8.37 | 7.91 | 7.83 | 7.84 | 7.67 | 7.61 |
| 6.42  | 9.11 | 8.98 | 8.83 | 8.81 | 8.41 | 8.40 | 8.23 | 8.16 | 7.81 | 7.63 | 7.61 |
| 6.62  | 8.93 | 8.83 | 8.68 | 8.37 | 8.25 | 8.17 | 8.07 | 7.93 | 7.79 | 7.60 | 7.57 |
| 6.82  | 8.82 | 8.76 | 8.68 | 8.30 | 8.18 | 8.19 | 8.08 | 7.81 | 7.84 | 7.67 | 7.61 |
| 7.02  | 9.06 | 8.83 | 8.84 | 8.57 | 8.51 | 8.41 | 8.19 | 8.08 | 7.80 | 7.82 | 7.77 |
| 7.22  | 8.73 | 8.77 | 8.55 | 8.37 | 8.25 | 8.13 | 8.05 | 7.72 | 7.54 | 7.63 | 7.53 |
| 7.42  | 9.25 | 9.02 | 8.99 | 8.98 | 8.49 | 8.50 | 8.27 | 7.94 | 7.88 | 8.02 | 7.76 |
| 7.62  | 8.61 | 8.48 | 8.35 | 8.21 | 7.87 | 7.84 | 7.84 | 7.57 | 7.32 | 7.61 | 7.30 |
| 7.82  | 8.68 | 8.73 | 8.51 | 8.50 | 8.22 | 8.14 | 7.94 | 7.74 | 7.72 | 7.67 | 7.56 |
| 8.02  | 8.52 | 8.56 | 8.35 | 8.18 | 7.97 | 7.94 | 7.86 | 7.60 | 7.53 | 7.44 | 7.35 |
| 8.22  | 8.59 | 8.55 | 8.34 | 8.22 | 8.14 | 7.88 | 7.81 | 7.74 | 7.64 | 7.51 | 7.33 |
| 8.42  | 8.86 | 8.63 | 8.52 | 8.45 | 8.32 | 8.39 | 8.19 | 7.72 | 7.74 | 7.52 | 7.55 |
| 8.62  | 8.50 | 8.24 | 8.08 | 8.09 | 7.97 | 7.92 | 7.82 | 7.56 | 7.47 | 7.32 | 7.36 |
| 8.82  | 8.76 | 8.49 | 8.32 | 8.45 | 8.09 | 8.06 | 7.94 | 7.68 | 7.53 | 7.52 | 7.29 |
| 9.02  | 8.63 | 8.36 | 8.42 | 8.24 | 7.87 | 8.03 | 7.74 | 7.45 | 7.52 | 7.53 | 7.27 |
| 9.22  | 8.66 | 8.72 | 8.54 | 8.33 | 8.04 | 7.98 | 7.80 | 7.53 | 7.60 | 7.59 | 7.36 |
| 9.42  | 8.41 | 8.21 | 8.10 | 8.13 | 7.79 | 7.95 | 7.70 | 7.37 | 7.41 | 7.37 | 7.20 |
| 9.62  | 8.77 | 8.63 | 8.48 | 8.15 | 8.11 | 7.94 | 7.76 | 7.78 | 7.56 | 7.29 | 7.41 |
| 9.82  | 8.53 | 8.44 | 8.48 | 8.26 | 8.19 | 7.89 | 7.54 | 7.43 | 7.32 | 7.28 | 7.19 |
| 10.02 | 8.31 | 8.24 | 8.15 | 8.11 | 7.67 | 7.83 | 7.71 | 7.38 | 7.42 | 7.38 | 7.19 |
| 10.22 | 8.42 | 8.31 | 8.16 | 8.01 | 7.88 | 7.69 | 7.61 | 7.45 | 7.32 | 7.27 | 7.25 |
| 10.42 | 8.43 | 8.45 | 8.40 | 8.24 | 7.70 | 7.92 | 7.91 | 7.55 | 7.31 | 7.37 | 7.15 |
| 10.62 | 8.47 | 8.63 | 8.35 | 8.22 | 7.94 | 8.23 | 7.59 | 7.32 | 7.42 | 7.18 | 7.18 |
| 10.82 | 8.48 | 8.37 | 8.26 | 8.20 | 7.79 | 7.86 | 7.66 | 7.29 | 7.15 | 7.16 | 7.09 |
| 11.02 | 8.51 | 8.38 | 8.16 | 8.16 | 7.95 | 7.83 | 7.53 | 7.51 | 7.22 | 6.95 | 7.13 |
| 11.22 | 8.11 | 8.13 | 8.02 | 7.95 | 7.69 | 7.78 | 7.93 | 7.26 | 7.14 | 7.35 | 7.16 |
| 11.42 | 8.20 | 8.10 | 7.75 | 7.65 | 7.51 | 7.40 | 7.42 | 6.86 | 7.09 | 6.98 | 6.97 |
| 11.62 | 8.57 | 8.44 | 8.29 | 8.30 | 7.94 | 8.00 | 7.81 | 7.63 | 7.28 | 7.41 | 7.18 |
| 11.82 | 8.53 | 8.30 | 8.12 | 8.03 | 7.78 | 7.81 | 7.37 | 7.32 | 7.38 | 7.30 | 7.17 |
| 12.02 | 8.42 | 8.37 | 7.92 | 7.83 | 7.56 | 7.75 | 7.41 | 7.20 | 7.26 | 7.07 | 6.95 |

|       |      |      |      |      |      |      |      |      |      |      |      |
|-------|------|------|------|------|------|------|------|------|------|------|------|
| 12.22 | 8.60 | 8.59 | 8.54 | 8.43 | 7.95 | 7.93 | 7.81 | 7.66 | 7.35 | 7.37 | 7.21 |
| 12.42 | 8.50 | 8.40 | 8.24 | 8.17 | 7.88 | 7.76 | 7.76 | 7.54 | 7.31 | 7.33 | 7.01 |
| 12.62 | 8.16 | 7.90 | 7.84 | 7.91 | 7.48 | 7.61 | 7.23 | 7.23 | 7.13 | 6.99 | 7.03 |
| 12.82 | 7.83 | 7.95 | 7.77 | 7.52 | 7.36 | 7.19 | 7.32 | 7.06 | 6.90 | 6.74 | 6.86 |
| 13.02 | 8.60 | 8.61 | 8.36 | 8.05 | 7.91 | 7.94 | 7.47 | 7.41 | 7.20 | 7.00 | 7.08 |
| 13.22 | 8.38 | 8.40 | 8.13 | 8.10 | 7.81 | 7.59 | 7.67 | 7.40 | 7.33 | 7.25 | 7.00 |
| 13.42 | 8.31 | 8.31 | 8.26 | 8.08 | 7.84 | 7.80 | 7.66 | 7.50 | 7.34 | 7.10 | 7.19 |
| 13.50 | 7.99 | 8.07 | 7.77 | 7.75 | 7.54 | 7.56 | 7.28 | 7.21 | 7.00 | 7.19 | 6.76 |
| 13.59 | 8.22 | 8.27 | 8.10 | 7.94 | 7.54 | 7.52 | 7.42 | 7.45 | 7.14 | 7.09 | 6.92 |
| 13.68 | 8.20 | 8.12 | 8.20 | 7.91 | 7.64 | 7.55 | 7.59 | 7.18 | 7.33 | 7.18 | 7.02 |
| 13.78 | 8.29 | 8.11 | 8.00 | 7.89 | 7.70 | 7.67 | 7.60 | 7.09 | 7.10 | 7.01 | 6.91 |
| 13.88 | 8.45 | 8.16 | 8.27 | 7.93 | 7.71 | 7.67 | 7.50 | 7.18 | 7.18 | 7.30 | 7.05 |
| 14.00 | 8.35 | 8.35 | 8.01 | 8.09 | 7.75 | 7.51 | 7.30 | 7.28 | 7.21 | 7.17 | 6.93 |
| 14.12 | 8.35 | 8.36 | 8.24 | 8.12 | 7.78 | 7.49 | 7.53 | 7.30 | 7.22 | 7.12 | 7.04 |
| 14.25 | 8.35 | 8.34 | 8.08 | 8.11 | 7.65 | 7.60 | 7.46 | 7.16 | 6.80 | 6.99 | 6.77 |
| 14.40 | 8.56 | 8.60 | 8.28 | 8.20 | 7.86 | 7.90 | 7.73 | 7.61 | 7.32 | 7.20 | 7.15 |
| 14.55 | 8.35 | 8.33 | 8.18 | 7.97 | 7.86 | 7.64 | 7.48 | 7.27 | 7.10 | 7.09 | 6.89 |
| 14.72 | 8.42 | 8.53 | 8.29 | 8.10 | 7.86 | 7.73 | 7.48 | 7.26 | 7.31 | 7.09 | 6.82 |
| 14.90 | 7.96 | 7.85 | 7.72 | 7.65 | 7.30 | 7.21 | 7.17 | 6.99 | 6.85 | 6.80 | 6.49 |
| 15.09 | 8.16 | 8.08 | 7.86 | 7.69 | 7.57 | 7.63 | 7.35 | 7.17 | 7.04 | 6.88 | 6.83 |
| 15.30 | 8.08 | 7.98 | 7.77 | 8.06 | 7.62 | 7.35 | 7.40 | 7.08 | 7.18 | 7.05 | 6.91 |
| 15.53 | 8.42 | 8.42 | 8.37 | 8.31 | 7.97 | 7.71 | 7.68 | 7.49 | 7.39 | 7.36 | 7.27 |
| 15.77 | 8.42 | 8.37 | 8.16 | 8.13 | 7.72 | 7.78 | 7.37 | 7.22 | 7.33 | 7.16 | 7.04 |
| 16.04 | 8.51 | 8.59 | 8.37 | 8.21 | 7.78 | 8.07 | 7.64 | 7.27 | 7.17 | 7.22 | 7.12 |
| 16.32 | 8.13 | 8.02 | 8.06 | 7.92 | 7.64 | 7.39 | 7.23 | 7.17 | 6.96 | 6.81 | 6.91 |
| 16.63 | 8.34 | 8.17 | 8.10 | 7.83 | 7.53 | 7.46 | 7.35 | 7.22 | 6.99 | 6.88 | 7.14 |
| 16.96 | 8.34 | 8.30 | 8.03 | 8.00 | 7.64 | 7.78 | 7.55 | 7.23 | 7.17 | 7.05 | 7.03 |
| 17.31 | 8.40 | 8.33 | 8.05 | 7.82 | 7.77 | 7.65 | 7.42 | 7.24 | 7.53 | 7.09 | 6.99 |
| 17.70 | 8.36 | 8.22 | 7.96 | 8.02 | 7.74 | 7.83 | 7.51 | 7.08 | 7.20 | 7.24 | 7.13 |
| 18.11 | 8.07 | 8.22 | 7.92 | 8.05 | 7.55 | 7.42 | 7.30 | 7.04 | 7.04 | 7.03 | 6.87 |
| 18.56 | 8.01 | 8.04 | 7.78 | 7.87 | 7.53 | 7.48 | 7.46 | 7.05 | 7.03 | 7.00 | 6.76 |
| 19.04 | 8.13 | 7.98 | 7.74 | 7.83 | 7.52 | 7.35 | 7.28 | 7.18 | 7.06 | 6.81 | 6.83 |
| 19.56 | 8.22 | 8.06 | 7.93 | 7.83 | 7.54 | 7.59 | 7.14 | 7.25 | 7.02 | 6.96 | 6.83 |
| 20.12 | 8.18 | 8.17 | 7.84 | 7.85 | 7.59 | 7.64 | 7.47 | 7.16 | 6.96 | 7.14 | 6.93 |
| 20.72 | 8.42 | 8.29 | 8.18 | 8.00 | 7.64 | 7.56 | 7.42 | 7.21 | 7.20 | 6.90 | 6.90 |
| 21.37 | 8.19 | 8.07 | 8.07 | 7.92 | 7.49 | 7.48 | 7.33 | 7.20 | 7.04 | 6.97 | 6.88 |
| 22.08 | 8.88 | 8.69 | 8.62 | 8.41 | 8.11 | 8.07 | 7.80 | 7.79 | 7.47 | 7.36 | 7.24 |
| 22.84 | 8.26 | 8.20 | 8.00 | 7.80 | 7.66 | 7.67 | 7.33 | 7.11 | 7.24 | 6.98 | 7.01 |
| 23.65 | 8.38 | 8.22 | 7.86 | 7.92 | 7.51 | 7.47 | 7.37 | 7.20 | 7.06 | 6.97 | 6.70 |
| 24.54 | 8.07 | 7.92 | 7.89 | 7.73 | 7.66 | 7.41 | 7.25 | 7.08 | 7.03 | 6.89 | 6.83 |
| 25.49 | 8.37 | 8.33 | 8.08 | 8.10 | 7.79 | 7.32 | 7.40 | 6.96 | 7.25 | 7.14 | 6.94 |
| 26.51 | 8.03 | 7.90 | 7.74 | 7.74 | 7.39 | 7.14 | 7.07 | 6.94 | 6.88 | 6.92 | 6.83 |
| 27.62 | 8.20 | 8.11 | 7.89 | 7.84 | 7.36 | 7.36 | 7.35 | 6.88 | 6.86 | 6.89 | 6.99 |
| 28.81 | 8.18 | 8.25 | 8.15 | 8.04 | 7.69 | 7.47 | 7.27 | 7.18 | 6.99 | 6.96 | 6.77 |
| 30.10 | 7.87 | 7.80 | 7.59 | 7.37 | 7.57 | 7.36 | 6.92 | 6.66 | 6.96 | 6.72 | 6.56 |
| 31.49 | 8.01 | 7.94 | 7.78 | 7.68 | 7.40 | 7.09 | 6.92 | 6.79 | 6.82 | 6.80 | 6.40 |
| 32.98 | 7.93 | 7.89 | 7.59 | 7.66 | 7.29 | 7.11 | 7.10 | 6.97 | 6.60 | 6.77 | 6.44 |
| 34.60 | 7.97 | 7.88 | 7.78 | 7.48 | 7.21 | 7.21 | 7.10 | 6.96 | 6.65 | 6.66 | 6.65 |
| 36.34 | 7.95 | 7.92 | 7.91 | 7.54 | 7.32 | 7.48 | 7.22 | 6.87 | 7.05 | 6.76 | 6.63 |
| 38.21 | 7.80 | 7.73 | 7.46 | 7.52 | 7.12 | 7.17 | 6.89 | 6.62 | 6.52 | 6.68 | 6.54 |



|         |      |      |      |      |      |      |      |      |      |      |      |
|---------|------|------|------|------|------|------|------|------|------|------|------|
| 40.24   | 8.18 | 8.18 | 7.98 | 8.01 | 7.45 | 7.32 | 7.29 | 7.11 | 6.93 | 6.78 | 6.75 |
| 42.42   | 7.58 | 7.47 | 7.45 | 7.38 | 7.11 | 7.03 | 6.91 | 6.64 | 6.57 | 6.67 | 6.31 |
| 44.78   | 8.02 | 7.88 | 7.66 | 7.37 | 7.21 | 7.25 | 6.87 | 6.77 | 6.59 | 6.55 | 6.49 |
| 47.32   | 7.99 | 8.00 | 7.58 | 7.67 | 7.23 | 7.26 | 6.94 | 6.82 | 6.67 | 6.38 | 6.39 |
| 50.06   | 8.11 | 7.98 | 7.81 | 7.77 | 7.57 | 7.15 | 7.07 | 6.87 | 6.92 | 6.69 | 6.58 |
| 53.01   | 8.11 | 7.99 | 7.78 | 7.79 | 7.51 | 7.26 | 7.19 | 6.95 | 6.80 | 6.81 | 6.55 |
| 56.20   | 7.93 | 7.87 | 7.64 | 7.48 | 7.25 | 7.11 | 6.88 | 6.62 | 6.51 | 6.66 | 6.55 |
| 59.64   | 7.58 | 7.56 | 7.24 | 7.34 | 6.99 | 7.14 | 6.92 | 6.62 | 6.46 | 6.60 | 6.44 |
| 63.34   | 7.78 | 7.71 | 7.53 | 7.23 | 7.05 | 6.96 | 6.73 | 6.57 | 6.39 | 6.55 | 6.31 |
| 67.34   | 7.56 | 7.39 | 7.23 | 7.00 | 6.84 | 6.82 | 6.62 | 6.49 | 6.52 | 6.32 | 6.28 |
| 71.65   | 7.65 | 7.55 | 7.32 | 7.31 | 6.87 | 6.88 | 6.72 | 6.72 | 6.54 | 6.47 | 6.51 |
| 76.30   | 7.81 | 7.67 | 7.47 | 7.25 | 7.26 | 7.04 | 6.81 | 6.85 | 6.45 | 6.41 | 6.32 |
| 81.32   | 7.79 | 7.59 | 7.51 | 7.56 | 6.99 | 6.93 | 6.64 | 6.76 | 6.31 | 6.34 | 6.40 |
| 86.73   | 7.77 | 7.83 | 7.61 | 7.39 | 6.97 | 6.95 | 6.80 | 6.50 | 6.43 | 6.37 | 6.25 |
| 92.56   | 7.54 | 7.54 | 7.43 | 7.21 | 6.72 | 6.87 | 6.60 | 6.44 | 6.27 | 6.13 | 6.19 |
| 98.85   | 7.53 | 7.47 | 7.37 | 6.91 | 6.92 | 6.81 | 6.54 | 6.36 | 6.14 | 6.31 | 6.18 |
| 105.64  | 7.61 | 7.61 | 7.31 | 7.32 | 7.09 | 6.85 | 6.75 | 6.45 | 6.38 | 6.37 | 6.21 |
| 112.96  | 7.67 | 7.56 | 7.38 | 7.43 | 6.95 | 6.89 | 6.88 | 6.52 | 6.43 | 6.34 | 6.12 |
| 120.85  | 7.14 | 7.13 | 6.92 | 6.75 | 6.45 | 6.48 | 6.15 | 6.10 | 6.02 | 5.96 | 5.93 |
| 129.36  | 7.76 | 7.75 | 7.48 | 7.33 | 6.95 | 6.91 | 6.70 | 6.43 | 6.50 | 6.46 | 6.17 |
| 138.55  | 7.56 | 7.51 | 7.21 | 7.06 | 6.76 | 6.67 | 6.38 | 6.31 | 5.93 | 6.21 | 6.12 |
| 148.45  | 7.75 | 7.64 | 7.51 | 7.41 | 6.88 | 6.42 | 6.52 | 6.38 | 6.23 | 6.41 | 6.10 |
| 159.13  | 7.59 | 7.29 | 7.23 | 7.23 | 6.96 | 6.84 | 6.46 | 6.35 | 6.26 | 6.18 | 6.05 |
| 170.65  | 7.52 | 7.44 | 7.51 | 7.08 | 6.81 | 6.73 | 6.48 | 6.54 | 6.43 | 6.26 | 6.17 |
| 183.07  | 7.38 | 7.25 | 7.04 | 6.94 | 6.70 | 6.75 | 6.27 | 6.32 | 6.07 | 6.01 | 6.01 |
| 196.47  | 7.39 | 7.33 | 7.18 | 7.03 | 6.65 | 6.59 | 6.54 | 6.06 | 5.89 | 6.20 | 6.07 |
| 210.91  | 7.36 | 7.24 | 7.14 | 6.84 | 6.71 | 6.42 | 6.43 | 6.31 | 5.88 | 6.13 | 5.94 |
| 226.50  | 7.13 | 6.96 | 6.94 | 6.81 | 6.52 | 6.36 | 6.13 | 5.94 | 6.03 | 5.78 | 5.74 |
| 243.31  | 7.24 | 7.10 | 7.00 | 6.82 | 6.63 | 6.45 | 6.35 | 6.13 | 5.85 | 5.79 | 5.67 |
| 261.43  | 7.35 | 7.17 | 7.11 | 6.99 | 6.62 | 6.59 | 6.44 | 6.17 | 6.08 | 5.87 | 6.04 |
| 280.98  | 7.24 | 7.18 | 6.95 | 6.85 | 6.51 | 6.49 | 6.17 | 5.87 | 6.07 | 5.87 | 5.86 |
| 302.07  | 7.06 | 6.98 | 6.81 | 6.39 | 6.31 | 6.25 | 5.93 | 5.97 | 5.84 | 5.85 | 5.77 |
| 324.81  | 6.99 | 6.95 | 6.71 | 6.55 | 6.34 | 6.52 | 6.02 | 5.81 | 5.89 | 5.93 | 5.97 |
| 349.33  | 6.95 | 6.73 | 6.43 | 6.45 | 6.28 | 6.13 | 5.87 | 5.74 | 5.65 | 5.69 | 5.65 |
| 375.79  | 7.19 | 6.90 | 6.82 | 6.60 | 6.33 | 6.41 | 5.98 | 5.87 | 5.85 | 5.69 | 5.78 |
| 404.31  | 6.93 | 6.86 | 6.64 | 6.47 | 6.46 | 6.07 | 5.98 | 5.92 | 5.69 | 5.58 | 5.66 |
| 435.08  | 7.42 | 7.39 | 7.00 | 6.94 | 6.53 | 6.52 | 6.21 | 5.98 | 6.02 | 5.95 | 5.70 |
| 468.27  | 7.14 | 7.07 | 6.75 | 6.78 | 6.28 | 6.34 | 6.22 | 5.95 | 5.90 | 5.68 | 5.83 |
| 504.06  | 6.97 | 6.88 | 6.70 | 6.52 | 6.16 | 5.93 | 5.80 | 5.80 | 5.71 | 5.68 | 5.60 |
| 542.66  | 7.13 | 6.90 | 6.76 | 6.64 | 6.28 | 6.01 | 6.14 | 5.92 | 5.92 | 5.71 | 5.76 |
| 584.29  | 7.03 | 6.80 | 6.67 | 6.47 | 6.14 | 6.01 | 5.84 | 5.80 | 5.55 | 5.41 | 5.54 |
| 629.18  | 6.89 | 6.66 | 6.40 | 6.43 | 6.16 | 6.11 | 5.81 | 5.76 | 5.56 | 5.47 | 5.42 |
| 677.61  | 7.18 | 6.89 | 6.70 | 6.53 | 6.43 | 6.10 | 5.82 | 5.74 | 5.74 | 5.75 | 5.56 |
| 729.83  | 6.42 | 6.23 | 6.29 | 6.15 | 5.80 | 5.58 | 5.47 | 5.16 | 5.45 | 5.21 | 5.32 |
| 786.16  | 6.77 | 6.51 | 6.22 | 6.18 | 5.71 | 5.73 | 5.74 | 5.28 | 5.53 | 5.31 | 5.38 |
| 846.90  | 6.84 | 6.52 | 6.31 | 6.05 | 5.77 | 5.66 | 5.57 | 5.57 | 5.19 | 5.31 | 5.33 |
| 912.42  | 6.44 | 6.26 | 6.14 | 5.86 | 5.74 | 5.67 | 5.55 | 5.44 | 5.22 | 5.52 | 5.35 |
| 983.08  | 6.69 | 6.47 | 6.31 | 6.21 | 5.97 | 5.80 | 5.62 | 5.37 | 5.26 | 5.25 | 5.38 |
| 1059.29 | 6.56 | 6.35 | 6.16 | 5.84 | 5.78 | 5.55 | 5.23 | 5.37 | 5.26 | 5.27 | 5.15 |
| 1141.48 | 6.34 | 6.49 | 6.16 | 5.94 | 5.87 | 5.87 | 5.55 | 5.28 | 5.29 | 5.30 | 5.14 |

|         |      |      |      |      |      |      |      |      |      |      |      |
|---------|------|------|------|------|------|------|------|------|------|------|------|
| 1230.13 | 6.69 | 6.49 | 6.34 | 6.05 | 5.82 | 5.64 | 5.65 | 5.36 | 5.27 | 5.28 | 5.09 |
| 1325.73 | 6.99 | 6.82 | 6.70 | 6.38 | 6.09 | 6.06 | 5.82 | 5.77 | 5.52 | 5.43 | 5.32 |
| 1428.84 | 6.78 | 6.39 | 6.22 | 6.22 | 6.05 | 5.82 | 5.72 | 5.52 | 5.48 | 5.36 | 5.43 |
| 1540.05 | 6.84 | 6.75 | 6.42 | 6.21 | 5.88 | 5.70 | 5.71 | 5.66 | 5.50 | 5.66 | 5.52 |
| 1659.99 | 6.54 | 6.44 | 6.23 | 5.94 | 5.76 | 5.67 | 5.43 | 5.34 | 5.19 | 5.33 | 5.28 |
| 1789.34 | 6.70 | 6.44 | 6.41 | 6.14 | 5.92 | 5.88 | 5.71 | 5.47 | 5.45 | 5.50 | 5.41 |
| 1928.85 | 6.61 | 6.27 | 6.10 | 5.91 | 5.85 | 5.61 | 5.48 | 5.21 | 5.18 | 5.37 | 5.29 |
| 2079.31 | 6.62 | 6.47 | 6.28 | 5.96 | 5.75 | 5.71 | 5.58 | 5.55 | 5.45 | 5.37 | 5.09 |
| 2241.59 | 6.59 | 6.48 | 6.27 | 6.01 | 5.79 | 5.71 | 5.84 | 5.37 | 5.34 | 5.39 | 5.26 |
| 2416.60 | 6.78 | 6.52 | 6.36 | 6.10 | 5.76 | 5.69 | 5.89 | 5.73 | 5.48 | 5.41 | 5.13 |
| 2605.36 | 6.65 | 6.42 | 6.17 | 6.14 | 5.63 | 5.54 | 5.59 | 5.36 | 5.14 | 5.33 | 5.25 |
| 2808.94 | 6.65 | 6.43 | 6.16 | 5.95 | 5.72 | 5.64 | 5.55 | 5.35 | 5.37 | 5.24 | 5.36 |
| 3028.50 | 6.29 | 6.15 | 5.86 | 5.75 | 5.73 | 5.28 | 5.11 | 4.90 | 5.03 | 5.05 | 4.94 |
| 3265.30 | 6.61 | 6.47 | 6.08 | 6.02 | 5.75 | 5.81 | 5.52 | 5.25 | 5.25 | 5.13 | 4.97 |
| 3520.69 | 6.77 | 6.40 | 6.34 | 6.11 | 5.88 | 5.58 | 5.39 | 5.33 | 5.16 | 5.26 | 5.33 |
| 3796.13 | 6.71 | 6.49 | 6.14 | 5.71 | 5.52 | 5.40 | 5.32 | 5.15 | 5.14 | 5.05 | 4.97 |

| Wavelength (nm) / Time (ps) | 412.41 | 413.84 | 415.26 | 416.68 | 418.11 | 419.53 | 420.96 | 422.38 | 423.80 | 425.23 | 426.65 |
|-----------------------------|--------|--------|--------|--------|--------|--------|--------|--------|--------|--------|--------|
| -3.78                       | -0.11  | -0.03  | -0.03  | 0.00   | 0.01   | -0.12  | -0.01  | -0.11  | -0.12  | 0.06   | -0.02  |
| -3.28                       | 0.07   | -0.05  | -0.13  | -0.13  | -0.22  | -0.14  | -0.15  | -0.10  | -0.10  | -0.06  | -0.10  |
| -2.78                       | 0.06   | 0.05   | 0.13   | 0.17   | 0.11   | 0.13   | 0.24   | 0.09   | 0.19   | 0.18   | 0.26   |
| -2.28                       | 0.01   | -0.12  | 0.02   | -0.03  | -0.04  | -0.01  | -0.06  | -0.01  | 0.06   | -0.11  | 0.00   |
| -1.78                       | -0.01  | 0.02   | -0.02  | 0.00   | -0.07  | -0.01  | -0.03  | -0.01  | 0.01   | 0.01   | -0.09  |
| -1.28                       | 0.03   | 0.14   | 0.17   | 0.09   | 0.04   | 0.01   | -0.08  | 0.05   | 0.09   | -0.02  | -0.02  |
| -0.78                       | -0.03  | 0.12   | 0.03   | -0.10  | 0.17   | 0.11   | 0.07   | 0.02   | -0.03  | -0.03  | -0.06  |
| -0.28                       | -0.01  | -0.12  | -0.16  | 0.01   | 0.01   | 0.01   | 0.01   | 0.06   | -0.10  | -0.03  | 0.03   |
| -0.18                       | 0.08   | 0.13   | 0.11   | 0.01   | 0.15   | 0.10   | 0.01   | 0.06   | -0.01  | -0.03  | -0.01  |
| -0.08                       | 0.16   | 0.11   | 0.05   | 0.00   | -0.06  | 0.02   | -0.04  | -0.09  | -0.07  | -0.11  | -0.18  |
| 0.02                        | 0.10   | 0.12   | 0.01   | 0.14   | 0.11   | 0.13   | 0.09   | 0.06   | 0.03   | 0.05   | 0.02   |
| 0.12                        | -0.02  | -0.12  | -0.25  | -0.15  | -0.12  | -0.12  | -0.11  | -0.17  | -0.07  | -0.17  | -0.06  |
| 0.22                        | 0.11   | -0.05  | -0.09  | -0.15  | -0.06  | -0.01  | 0.02   | 0.02   | -0.03  | -0.08  | -0.09  |
| 0.27                        | -0.03  | 0.08   | -0.05  | 0.01   | 0.03   | 0.09   | -0.01  | -0.13  | -0.04  | -0.08  | -0.14  |
| 0.32                        | -0.37  | -0.23  | -0.23  | -0.23  | -0.13  | -0.13  | -0.14  | -0.04  | 0.07   | -0.16  | -0.04  |
| 0.37                        | 0.10   | 0.05   | -0.02  | 0.00   | -0.08  | -0.06  | -0.13  | -0.08  | -0.08  | -0.08  | -0.13  |
| 0.42                        | 0.07   | -0.02  | 0.02   | -0.09  | -0.03  | 0.00   | -0.02  | -0.06  | 0.05   | -0.03  | -0.01  |
| 0.47                        | 0.12   | 0.24   | 0.16   | 0.21   | 0.16   | 0.12   | 0.14   | 0.07   | 0.12   | 0.13   | -0.04  |
| 0.52                        | 0.14   | 0.09   | -0.01  | 0.03   | 0.07   | 0.06   | 0.03   | -0.04  | 0.02   | -0.05  | -0.09  |
| 0.57                        | -0.08  | -0.09  | -0.15  | -0.10  | -0.13  | -0.14  | -0.04  | -0.03  | -0.05  | -0.08  | -0.16  |
| 0.62                        | -0.06  | -0.15  | -0.09  | -0.12  | 0.08   | -0.03  | 0.00   | 0.01   | 0.03   | -0.17  | 0.01   |
| 0.67                        | 0.00   | -0.09  | 0.00   | -0.03  | 0.05   | 0.00   | 0.03   | -0.03  | -0.01  | 0.03   | 0.01   |
| 0.72                        | 0.25   | 0.05   | 0.06   | 0.17   | 0.02   | 0.14   | 0.17   | 0.07   | 0.13   | -0.06  | 0.04   |
| 0.77                        | 0.20   | 0.20   | 0.02   | -0.07  | -0.01  | 0.01   | -0.03  | -0.08  | -0.10  | -0.08  | -0.11  |
| 0.82                        | -0.02  | 0.09   | -0.02  | 0.02   | 0.06   | 0.02   | 0.09   | 0.02   | 0.07   | -0.13  | -0.12  |
| 0.87                        | 0.13   | 0.50   | 0.65   | -0.04  | -0.97  | -0.79  | 0.14   | 0.21   | -0.16  | -0.22  | -0.03  |
| 0.92                        | 1.20   | 3.86   | 1.08   | -6.74  | -15.43 | -19.75 | -15.92 | -6.48  | 0.97   | 2.71   | 1.05   |
| 0.97                        | 121.03 | 115.68 | 106.82 | 92.61  | 69.57  | 36.33  | -0.61  | -31.81 | -49.41 | -52.56 | -45.87 |
| 1.02                        | -93.95 | -73.21 | -39.46 | 4.48   | 54.52  | 102.37 | 139.31 | 158.41 | 159.76 | 146.81 | 124.90 |

|      |       |       |       |       |        |        |        |        |        |        |       |
|------|-------|-------|-------|-------|--------|--------|--------|--------|--------|--------|-------|
| 1.07 | 16.36 | 19.20 | 17.89 | 7.92  | -10.81 | -32.54 | -49.71 | -56.26 | -49.61 | -30.68 | -1.84 |
| 1.12 | 13.16 | 12.35 | 11.86 | 12.21 | 13.53  | 15.27  | 16.42  | 15.69  | 14.22  | 13.80  | 14.72 |
| 1.17 | 12.01 | 12.91 | 13.10 | 12.80 | 12.42  | 12.39  | 12.49  | 12.41  | 11.98  | 10.99  | 10.03 |
| 1.22 | 11.66 | 11.89 | 12.75 | 13.26 | 13.23  | 12.31  | 11.17  | 10.57  | 10.74  | 11.30  | 11.60 |
| 1.27 | 12.27 | 11.72 | 11.05 | 10.81 | 10.94  | 11.56  | 11.71  | 11.21  | 10.71  | 10.24  | 10.35 |
| 1.32 | 10.47 | 11.18 | 11.48 | 11.12 | 10.49  | 10.12  | 10.35  | 10.78  | 11.01  | 10.57  | 9.75  |
| 1.37 | 10.39 | 10.04 | 9.99  | 10.33 | 10.81  | 10.92  | 10.53  | 9.85   | 9.47   | 9.14   | 9.32  |
| 1.42 | 10.94 | 10.96 | 10.59 | 10.23 | 10.11  | 10.32  | 10.31  | 10.03  | 9.55   | 8.70   | 8.23  |
| 1.47 | 9.70  | 10.06 | 10.57 | 10.61 | 10.31  | 9.64   | 9.34   | 9.28   | 9.58   | 9.61   | 9.34  |
| 1.52 | 10.42 | 9.64  | 9.54  | 9.74  | 10.14  | 10.16  | 9.80   | 9.04   | 8.66   | 8.45   | 8.54  |
| 1.57 | 9.96  | 10.21 | 9.93  | 9.36  | 9.15   | 9.43   | 9.56   | 9.50   | 9.10   | 8.38   | 7.58  |
| 1.62 | 8.76  | 9.32  | 9.84  | 10.09 | 9.92   | 9.21   | 8.75   | 8.58   | 8.64   | 8.75   | 8.46  |
| 1.67 | 9.75  | 9.24  | 9.02  | 9.02  | 9.24   | 9.46   | 9.11   | 8.57   | 8.12   | 7.85   | 7.84  |
| 1.72 | 9.12  | 9.49  | 9.56  | 9.23  | 8.82   | 8.83   | 8.67   | 8.69   | 8.74   | 8.46   | 8.04  |
| 1.77 | 9.04  | 8.86  | 8.96  | 9.34  | 9.63   | 9.30   | 8.81   | 8.31   | 8.12   | 8.00   | 7.79  |
| 1.82 | 9.39  | 9.29  | 8.79  | 8.52  | 8.55   | 8.75   | 8.80   | 8.52   | 7.96   | 7.34   | 7.05  |
| 1.87 | 9.02  | 9.39  | 9.40  | 9.35  | 8.89   | 8.61   | 8.43   | 8.39   | 8.50   | 8.23   | 7.81  |
| 1.92 | 9.16  | 8.65  | 8.39  | 8.46  | 8.92   | 8.91   | 8.57   | 8.13   | 7.82   | 7.62   | 7.61  |
| 1.97 | 8.68  | 8.86  | 8.75  | 8.41  | 8.26   | 8.27   | 8.40   | 8.31   | 8.03   | 7.52   | 7.09  |
| 2.02 | 8.66  | 8.57  | 8.69  | 8.99  | 9.08   | 8.74   | 8.42   | 8.18   | 7.91   | 7.85   | 7.68  |
| 2.07 | 8.91  | 8.50  | 8.32  | 8.45  | 8.69   | 8.68   | 8.38   | 8.01   | 7.47   | 7.33   | 7.28  |
| 2.12 | 8.62  | 8.77  | 8.83  | 8.63  | 8.31   | 8.22   | 8.22   | 8.16   | 7.91   | 7.57   | 7.02  |
| 2.17 | 8.28  | 8.42  | 8.50  | 8.60  | 8.46   | 8.22   | 7.83   | 7.40   | 7.44   | 7.25   | 7.04  |
| 2.22 | 8.96  | 8.88  | 8.42  | 8.19  | 8.33   | 8.31   | 8.24   | 7.89   | 7.53   | 7.22   | 6.94  |
| 2.27 | 8.60  | 8.65  | 8.90  | 8.71  | 8.51   | 8.20   | 8.02   | 8.05   | 7.88   | 7.61   | 7.28  |
| 2.32 | 8.23  | 8.05  | 7.89  | 8.06  | 8.26   | 8.05   | 7.83   | 7.45   | 7.22   | 6.95   | 6.87  |
| 2.37 | 8.74  | 8.73  | 8.53  | 8.25  | 8.20   | 8.05   | 8.12   | 8.00   | 7.70   | 7.07   | 6.73  |
| 2.42 | 8.26  | 8.43  | 8.46  | 8.56  | 8.24   | 8.05   | 7.80   | 7.59   | 7.47   | 7.34   | 6.99  |
| 2.47 | 8.51  | 8.48  | 8.21  | 8.25  | 8.37   | 8.16   | 7.96   | 7.61   | 7.26   | 7.01   | 6.95  |
| 2.52 | 8.43  | 8.59  | 8.50  | 8.34  | 8.12   | 8.02   | 7.94   | 7.85   | 7.54   | 7.11   | 6.73  |
| 2.57 | 8.34  | 8.29  | 8.39  | 8.36  | 8.50   | 8.17   | 7.80   | 7.45   | 7.36   | 7.15   | 6.95  |
| 2.62 | 8.66  | 8.42  | 8.22  | 8.19  | 8.18   | 8.20   | 8.00   | 7.70   | 7.16   | 7.03   | 6.73  |
| 2.67 | 8.28  | 8.39  | 8.27  | 8.23  | 7.93   | 7.82   | 7.75   | 7.54   | 7.48   | 7.19   | 6.74  |
| 2.72 | 8.01  | 8.00  | 8.01  | 8.05  | 8.22   | 8.03   | 7.77   | 7.27   | 7.10   | 6.90   | 6.78  |
| 2.77 | 8.25  | 8.27  | 8.19  | 7.98  | 7.87   | 7.77   | 7.97   | 7.59   | 7.32   | 6.93   | 6.68  |
| 2.82 | 8.21  | 8.21  | 8.32  | 8.32  | 8.12   | 7.90   | 7.79   | 7.46   | 7.40   | 7.06   | 6.79  |
| 2.87 | 8.20  | 8.17  | 8.09  | 8.03  | 8.02   | 7.86   | 7.59   | 7.26   | 7.10   | 6.91   | 6.64  |
| 2.92 | 8.14  | 8.43  | 8.45  | 8.10  | 8.02   | 7.85   | 7.79   | 7.60   | 7.46   | 7.05   | 6.66  |
| 2.97 | 8.24  | 8.06  | 8.15  | 8.17  | 8.01   | 7.94   | 7.78   | 7.41   | 7.24   | 7.05   | 6.79  |
| 3.02 | 8.44  | 8.23  | 8.12  | 8.08  | 7.96   | 7.82   | 7.67   | 7.44   | 7.07   | 6.86   | 6.69  |
| 3.07 | 8.12  | 8.26  | 8.18  | 8.15  | 7.99   | 7.71   | 7.67   | 7.43   | 7.22   | 6.94   | 6.61  |
| 3.12 | 7.95  | 7.84  | 7.92  | 7.99  | 7.86   | 7.72   | 7.54   | 7.21   | 6.96   | 6.84   | 6.65  |
| 3.17 | 8.26  | 8.52  | 8.20  | 8.07  | 8.06   | 7.98   | 7.90   | 7.66   | 7.37   | 6.98   | 6.68  |
| 3.22 | 8.02  | 8.21  | 8.24  | 8.11  | 8.14   | 7.84   | 7.67   | 7.54   | 7.44   | 7.06   | 6.81  |
| 3.42 | 8.05  | 8.20  | 8.02  | 7.99  | 7.99   | 8.00   | 7.75   | 7.40   | 7.14   | 6.84   | 6.52  |
| 3.62 | 8.19  | 8.22  | 8.23  | 8.11  | 7.90   | 7.92   | 7.70   | 7.57   | 7.30   | 6.97   | 6.75  |
| 3.82 | 7.92  | 7.85  | 7.86  | 7.91  | 7.81   | 7.68   | 7.61   | 7.30   | 6.97   | 6.81   | 6.55  |
| 4.02 | 8.02  | 8.11  | 8.06  | 8.03  | 7.85   | 7.62   | 7.47   | 7.25   | 7.08   | 6.89   | 6.56  |
| 4.22 | 7.84  | 7.99  | 7.75  | 7.73  | 7.68   | 7.63   | 7.53   | 7.21   | 7.09   | 6.70   | 6.49  |
| 4.42 | 7.95  | 7.89  | 7.72  | 7.74  | 7.78   | 7.52   | 7.47   | 7.14   | 6.97   | 6.66   | 6.45  |

|       |      |      |      |      |      |      |      |      |      |      |      |
|-------|------|------|------|------|------|------|------|------|------|------|------|
| 4.62  | 8.01 | 7.92 | 7.95 | 7.93 | 7.80 | 7.80 | 7.64 | 7.21 | 7.02 | 6.72 | 6.42 |
| 4.82  | 7.80 | 7.77 | 7.57 | 7.66 | 7.55 | 7.38 | 7.26 | 7.08 | 6.87 | 6.52 | 6.33 |
| 5.02  | 7.91 | 7.88 | 7.81 | 7.93 | 7.90 | 7.68 | 7.50 | 7.24 | 7.05 | 6.69 | 6.44 |
| 5.22  | 7.70 | 7.69 | 7.72 | 7.66 | 7.61 | 7.40 | 7.30 | 7.14 | 6.94 | 6.53 | 6.47 |
| 5.42  | 7.71 | 7.70 | 7.75 | 7.52 | 7.59 | 7.40 | 7.35 | 7.14 | 6.85 | 6.56 | 6.32 |
| 5.62  | 7.76 | 7.70 | 7.59 | 7.56 | 7.46 | 7.41 | 7.38 | 7.01 | 6.72 | 6.50 | 6.29 |
| 5.82  | 7.72 | 7.67 | 7.61 | 7.53 | 7.48 | 7.34 | 7.12 | 6.83 | 6.63 | 6.35 | 6.05 |
| 6.02  | 7.52 | 7.59 | 7.50 | 7.55 | 7.43 | 7.27 | 7.21 | 6.85 | 6.77 | 6.56 | 6.16 |
| 6.22  | 7.73 | 7.59 | 7.63 | 7.60 | 7.51 | 7.40 | 7.16 | 6.98 | 6.66 | 6.45 | 6.11 |
| 6.42  | 7.65 | 7.67 | 7.61 | 7.45 | 7.41 | 7.35 | 7.14 | 6.99 | 6.66 | 6.45 | 6.11 |
| 6.62  | 7.67 | 7.40 | 7.67 | 7.61 | 7.39 | 7.37 | 7.26 | 6.89 | 6.71 | 6.52 | 6.17 |
| 6.82  | 7.65 | 7.62 | 7.53 | 7.60 | 7.53 | 7.40 | 7.10 | 6.90 | 6.71 | 6.44 | 6.19 |
| 7.02  | 7.67 | 7.67 | 7.66 | 7.62 | 7.68 | 7.38 | 7.19 | 6.88 | 6.71 | 6.45 | 6.32 |
| 7.22  | 7.51 | 7.45 | 7.49 | 7.44 | 7.40 | 7.23 | 7.11 | 6.81 | 6.64 | 6.42 | 6.18 |
| 7.42  | 7.55 | 7.71 | 7.59 | 7.56 | 7.35 | 7.41 | 7.13 | 6.81 | 6.69 | 6.36 | 6.07 |
| 7.62  | 7.47 | 7.43 | 7.52 | 7.50 | 7.37 | 7.25 | 7.11 | 6.90 | 6.67 | 6.37 | 6.12 |
| 7.82  | 7.50 | 7.53 | 7.53 | 7.50 | 7.25 | 7.20 | 7.07 | 6.74 | 6.62 | 6.24 | 6.10 |
| 8.02  | 7.56 | 7.39 | 7.29 | 7.39 | 7.20 | 7.15 | 7.00 | 6.70 | 6.52 | 6.22 | 5.96 |
| 8.22  | 7.32 | 7.30 | 7.37 | 7.23 | 7.20 | 7.11 | 6.95 | 6.65 | 6.43 | 6.20 | 6.00 |
| 8.42  | 7.54 | 7.49 | 7.40 | 7.32 | 7.25 | 7.14 | 7.01 | 6.74 | 6.49 | 6.25 | 6.04 |
| 8.62  | 7.32 | 7.27 | 7.32 | 7.25 | 7.15 | 7.14 | 6.97 | 6.75 | 6.54 | 6.34 | 5.93 |
| 8.82  | 7.36 | 7.33 | 7.27 | 7.36 | 7.33 | 7.23 | 7.01 | 6.84 | 6.62 | 6.39 | 6.05 |
| 9.02  | 7.23 | 7.39 | 7.24 | 7.14 | 7.14 | 7.03 | 6.96 | 6.63 | 6.35 | 6.24 | 5.88 |
| 9.22  | 7.48 | 7.36 | 7.35 | 7.20 | 7.28 | 7.15 | 6.85 | 6.72 | 6.42 | 6.14 | 5.90 |
| 9.42  | 7.21 | 7.29 | 7.06 | 7.23 | 7.17 | 7.04 | 6.74 | 6.64 | 6.45 | 6.21 | 5.91 |
| 9.62  | 7.40 | 7.22 | 7.25 | 7.20 | 7.15 | 6.99 | 6.82 | 6.53 | 6.49 | 6.12 | 5.96 |
| 9.82  | 7.26 | 7.26 | 7.25 | 7.18 | 7.20 | 6.92 | 6.96 | 6.54 | 6.40 | 6.30 | 5.98 |
| 10.02 | 7.24 | 7.29 | 7.33 | 7.28 | 7.24 | 7.03 | 6.94 | 6.77 | 6.49 | 6.23 | 5.87 |
| 10.22 | 7.31 | 7.25 | 7.28 | 7.17 | 7.22 | 7.08 | 6.95 | 6.62 | 6.53 | 6.32 | 5.99 |
| 10.42 | 7.16 | 7.12 | 7.11 | 6.95 | 7.08 | 6.92 | 6.82 | 6.52 | 6.34 | 6.03 | 5.81 |
| 10.62 | 7.00 | 7.38 | 7.33 | 7.15 | 7.16 | 7.04 | 6.85 | 6.65 | 6.41 | 6.11 | 5.93 |
| 10.82 | 7.13 | 7.08 | 7.03 | 7.02 | 6.96 | 6.94 | 6.86 | 6.55 | 6.35 | 6.02 | 5.85 |
| 11.02 | 7.22 | 7.21 | 7.14 | 7.13 | 7.03 | 7.03 | 6.85 | 6.56 | 6.36 | 6.06 | 5.91 |
| 11.22 | 7.15 | 7.14 | 7.02 | 7.03 | 7.00 | 6.91 | 6.76 | 6.62 | 6.29 | 6.00 | 5.79 |
| 11.42 | 6.96 | 7.04 | 7.05 | 6.96 | 6.95 | 6.85 | 6.66 | 6.42 | 6.28 | 6.00 | 5.71 |
| 11.62 | 7.34 | 7.27 | 7.20 | 7.11 | 6.91 | 6.88 | 6.67 | 6.45 | 6.34 | 5.98 | 5.80 |
| 11.82 | 7.34 | 7.30 | 7.22 | 7.24 | 7.02 | 6.87 | 6.81 | 6.56 | 6.36 | 6.12 | 5.75 |
| 12.02 | 6.93 | 6.96 | 6.92 | 6.87 | 6.85 | 6.61 | 6.50 | 6.37 | 6.12 | 5.97 | 5.77 |
| 12.22 | 7.19 | 7.24 | 7.09 | 7.08 | 7.04 | 6.96 | 6.82 | 6.54 | 6.41 | 6.23 | 5.96 |
| 12.42 | 7.28 | 7.27 | 7.04 | 7.12 | 7.09 | 6.92 | 6.75 | 6.54 | 6.20 | 5.99 | 5.73 |
| 12.62 | 7.11 | 7.08 | 7.07 | 6.94 | 7.07 | 6.85 | 6.69 | 6.46 | 6.23 | 6.01 | 5.77 |
| 12.82 | 6.91 | 6.78 | 6.84 | 6.90 | 6.78 | 6.68 | 6.65 | 6.44 | 6.21 | 5.88 | 5.63 |
| 13.02 | 6.93 | 6.87 | 6.95 | 6.94 | 6.79 | 6.77 | 6.64 | 6.43 | 6.28 | 5.94 | 5.76 |
| 13.22 | 7.15 | 7.10 | 7.15 | 6.98 | 6.92 | 6.90 | 6.78 | 6.51 | 6.26 | 5.98 | 5.65 |
| 13.42 | 7.00 | 7.16 | 7.07 | 7.04 | 7.00 | 6.84 | 6.71 | 6.46 | 6.19 | 6.05 | 5.71 |
| 13.50 | 7.01 | 6.91 | 7.01 | 6.85 | 6.85 | 6.72 | 6.64 | 6.33 | 6.09 | 5.88 | 5.58 |
| 13.59 | 6.91 | 6.94 | 6.87 | 6.94 | 6.96 | 6.72 | 6.70 | 6.49 | 6.21 | 5.96 | 5.79 |
| 13.68 | 7.05 | 6.94 | 6.96 | 6.91 | 6.84 | 6.82 | 6.50 | 6.34 | 6.12 | 5.89 | 5.57 |
| 13.78 | 7.04 | 7.03 | 6.97 | 6.89 | 6.79 | 6.71 | 6.52 | 6.32 | 6.01 | 5.73 | 5.59 |
| 13.88 | 7.18 | 7.04 | 6.94 | 6.97 | 6.93 | 6.83 | 6.73 | 6.37 | 6.17 | 5.97 | 5.66 |

|       |      |      |      |      |      |      |      |      |      |      |      |
|-------|------|------|------|------|------|------|------|------|------|------|------|
| 14.00 | 6.98 | 7.11 | 6.84 | 6.80 | 6.86 | 6.75 | 6.67 | 6.34 | 6.24 | 5.91 | 5.70 |
| 14.12 | 7.19 | 7.01 | 6.95 | 7.02 | 6.96 | 6.76 | 6.65 | 6.35 | 6.25 | 6.03 | 5.62 |
| 14.25 | 6.86 | 6.88 | 6.83 | 6.74 | 6.65 | 6.62 | 6.44 | 6.26 | 5.98 | 5.70 | 5.56 |
| 14.40 | 7.17 | 7.18 | 7.03 | 6.99 | 6.92 | 6.84 | 6.61 | 6.38 | 6.20 | 5.90 | 5.70 |
| 14.55 | 7.05 | 6.98 | 6.95 | 6.85 | 6.83 | 6.71 | 6.59 | 6.34 | 6.03 | 5.95 | 5.63 |
| 14.72 | 7.01 | 6.95 | 6.88 | 6.83 | 6.81 | 6.73 | 6.50 | 6.20 | 6.07 | 5.70 | 5.38 |
| 14.90 | 6.58 | 6.58 | 6.70 | 6.59 | 6.62 | 6.48 | 6.31 | 6.20 | 6.01 | 5.73 | 5.48 |
| 15.09 | 6.87 | 6.75 | 6.88 | 6.82 | 6.80 | 6.70 | 6.55 | 6.25 | 6.08 | 5.75 | 5.47 |
| 15.30 | 6.88 | 6.85 | 7.01 | 6.87 | 6.77 | 6.75 | 6.63 | 6.33 | 6.14 | 5.89 | 5.61 |
| 15.53 | 7.30 | 7.26 | 7.20 | 7.10 | 6.90 | 6.84 | 6.76 | 6.45 | 6.30 | 5.98 | 5.75 |
| 15.77 | 7.00 | 6.94 | 6.80 | 6.87 | 6.76 | 6.54 | 6.46 | 6.25 | 6.02 | 5.83 | 5.54 |
| 16.04 | 7.21 | 7.12 | 7.06 | 7.05 | 6.95 | 6.77 | 6.60 | 6.46 | 6.18 | 6.00 | 5.76 |
| 16.32 | 6.95 | 6.99 | 6.94 | 6.78 | 6.82 | 6.68 | 6.46 | 6.29 | 6.06 | 5.83 | 5.57 |
| 16.63 | 6.94 | 7.17 | 7.05 | 7.05 | 7.00 | 6.85 | 6.61 | 6.44 | 6.24 | 5.94 | 5.71 |
| 16.96 | 7.16 | 7.23 | 7.09 | 6.98 | 6.98 | 6.83 | 6.68 | 6.44 | 6.21 | 5.87 | 5.63 |
| 17.31 | 7.05 | 6.96 | 6.80 | 6.87 | 6.81 | 6.63 | 6.57 | 6.36 | 6.14 | 5.85 | 5.57 |
| 17.70 | 7.02 | 7.15 | 7.14 | 7.06 | 6.97 | 6.97 | 6.74 | 6.39 | 6.32 | 5.93 | 5.71 |
| 18.11 | 7.01 | 6.98 | 6.92 | 6.86 | 6.75 | 6.68 | 6.50 | 6.25 | 6.00 | 5.78 | 5.54 |
| 18.56 | 6.72 | 6.78 | 6.74 | 6.88 | 6.64 | 6.74 | 6.47 | 6.24 | 5.99 | 5.77 | 5.55 |
| 19.04 | 7.03 | 7.00 | 6.78 | 6.83 | 6.78 | 6.66 | 6.53 | 6.26 | 6.12 | 5.84 | 5.56 |
| 19.56 | 6.81 | 6.89 | 6.67 | 6.82 | 6.76 | 6.75 | 6.44 | 6.24 | 6.14 | 5.89 | 5.69 |
| 20.12 | 6.96 | 7.01 | 6.89 | 6.92 | 6.82 | 6.69 | 6.62 | 6.25 | 6.12 | 5.79 | 5.57 |
| 20.72 | 7.02 | 6.89 | 6.83 | 6.78 | 6.75 | 6.69 | 6.62 | 6.29 | 6.05 | 5.92 | 5.68 |
| 21.37 | 6.99 | 6.94 | 6.98 | 6.85 | 6.75 | 6.64 | 6.49 | 6.36 | 6.15 | 5.82 | 5.60 |
| 22.08 | 7.24 | 7.25 | 7.10 | 7.01 | 6.95 | 6.81 | 6.76 | 6.47 | 6.20 | 5.94 | 5.69 |
| 22.84 | 7.08 | 6.99 | 7.07 | 6.92 | 6.89 | 6.77 | 6.66 | 6.45 | 6.19 | 5.89 | 5.73 |
| 23.65 | 6.81 | 6.91 | 6.70 | 6.66 | 6.58 | 6.48 | 6.34 | 6.07 | 5.90 | 5.59 | 5.38 |
| 24.54 | 6.83 | 6.73 | 6.68 | 6.74 | 6.83 | 6.59 | 6.49 | 6.29 | 5.96 | 5.69 | 5.45 |
| 25.49 | 7.24 | 7.00 | 6.92 | 6.96 | 6.87 | 6.75 | 6.46 | 6.25 | 6.13 | 5.81 | 5.59 |
| 26.51 | 6.94 | 6.73 | 6.79 | 6.77 | 6.63 | 6.60 | 6.41 | 6.05 | 5.97 | 5.54 | 5.29 |
| 27.62 | 6.97 | 6.94 | 6.82 | 6.82 | 6.72 | 6.64 | 6.57 | 6.26 | 6.03 | 5.74 | 5.54 |
| 28.81 | 6.80 | 6.74 | 6.81 | 6.68 | 6.68 | 6.62 | 6.46 | 6.18 | 6.06 | 5.58 | 5.47 |
| 30.10 | 6.82 | 6.85 | 6.75 | 6.56 | 6.57 | 6.52 | 6.26 | 6.01 | 5.91 | 5.58 | 5.31 |
| 31.49 | 6.58 | 6.65 | 6.48 | 6.54 | 6.44 | 6.39 | 6.35 | 6.08 | 5.93 | 5.60 | 5.36 |
| 32.98 | 6.65 | 6.66 | 6.70 | 6.65 | 6.56 | 6.52 | 6.31 | 5.96 | 5.78 | 5.70 | 5.48 |
| 34.60 | 6.71 | 6.68 | 6.72 | 6.63 | 6.61 | 6.49 | 6.39 | 6.13 | 5.81 | 5.64 | 5.42 |
| 36.34 | 6.69 | 6.75 | 6.70 | 6.62 | 6.65 | 6.52 | 6.35 | 6.15 | 5.87 | 5.58 | 5.31 |
| 38.21 | 6.50 | 6.59 | 6.62 | 6.70 | 6.65 | 6.41 | 6.43 | 6.15 | 5.96 | 5.73 | 5.43 |
| 40.24 | 6.71 | 6.85 | 6.74 | 6.64 | 6.56 | 6.39 | 6.33 | 6.11 | 5.85 | 5.60 | 5.31 |
| 42.42 | 6.50 | 6.49 | 6.48 | 6.35 | 6.35 | 6.27 | 6.17 | 5.93 | 5.71 | 5.39 | 5.29 |
| 44.78 | 6.49 | 6.45 | 6.46 | 6.43 | 6.33 | 6.13 | 6.08 | 5.83 | 5.65 | 5.38 | 5.17 |
| 47.32 | 6.42 | 6.42 | 6.41 | 6.36 | 6.31 | 6.07 | 5.99 | 5.63 | 5.51 | 5.29 | 5.00 |
| 50.06 | 6.64 | 6.63 | 6.58 | 6.53 | 6.53 | 6.40 | 6.12 | 5.98 | 5.61 | 5.44 | 5.18 |
| 53.01 | 6.68 | 6.62 | 6.62 | 6.48 | 6.47 | 6.39 | 6.31 | 5.92 | 5.81 | 5.49 | 5.14 |
| 56.20 | 6.46 | 6.64 | 6.45 | 6.47 | 6.39 | 6.25 | 6.16 | 5.93 | 5.70 | 5.42 | 5.20 |
| 59.64 | 6.46 | 6.39 | 6.60 | 6.55 | 6.53 | 6.31 | 6.17 | 5.88 | 5.66 | 5.30 | 5.17 |
| 63.34 | 6.46 | 6.30 | 6.22 | 6.23 | 6.14 | 6.07 | 6.02 | 5.78 | 5.48 | 5.35 | 5.11 |
| 67.34 | 6.37 | 6.30 | 6.26 | 6.23 | 6.23 | 6.05 | 6.00 | 5.67 | 5.41 | 5.32 | 4.98 |
| 71.65 | 6.47 | 6.36 | 6.44 | 6.36 | 6.49 | 6.26 | 6.18 | 5.81 | 5.66 | 5.38 | 5.14 |
| 76.30 | 6.33 | 6.35 | 6.32 | 6.31 | 6.24 | 6.06 | 5.98 | 5.74 | 5.49 | 5.33 | 4.98 |

|         |      |      |      |      |      |      |      |      |      |      |      |
|---------|------|------|------|------|------|------|------|------|------|------|------|
| 81.32   | 6.43 | 6.33 | 6.42 | 6.29 | 6.28 | 6.21 | 6.02 | 5.82 | 5.66 | 5.42 | 5.21 |
| 86.73   | 6.23 | 6.35 | 6.20 | 6.21 | 6.12 | 6.25 | 5.93 | 5.75 | 5.57 | 5.33 | 5.06 |
| 92.56   | 6.19 | 6.24 | 6.17 | 6.24 | 6.20 | 6.12 | 6.03 | 5.85 | 5.68 | 5.32 | 5.01 |
| 98.85   | 6.09 | 6.14 | 6.15 | 6.20 | 6.06 | 6.00 | 5.81 | 5.70 | 5.54 | 5.21 | 5.05 |
| 105.64  | 6.23 | 6.19 | 6.18 | 6.18 | 6.12 | 5.97 | 5.96 | 5.60 | 5.34 | 5.30 | 4.96 |
| 112.96  | 6.13 | 6.31 | 6.08 | 6.13 | 6.17 | 5.94 | 5.86 | 5.66 | 5.40 | 5.17 | 5.03 |
| 120.85  | 5.97 | 5.96 | 6.07 | 6.19 | 6.05 | 5.96 | 5.87 | 5.71 | 5.54 | 5.28 | 5.12 |
| 129.36  | 6.33 | 6.21 | 6.17 | 6.17 | 6.09 | 6.00 | 5.88 | 5.72 | 5.57 | 5.21 | 5.02 |
| 138.55  | 6.03 | 6.06 | 6.07 | 6.11 | 6.09 | 6.00 | 5.92 | 5.64 | 5.37 | 5.29 | 5.08 |
| 148.45  | 6.05 | 6.17 | 6.12 | 6.17 | 6.00 | 5.86 | 5.73 | 5.51 | 5.36 | 5.15 | 4.98 |
| 159.13  | 6.34 | 6.20 | 6.19 | 6.10 | 6.18 | 5.93 | 5.77 | 5.66 | 5.37 | 5.27 | 4.97 |
| 170.65  | 6.30 | 6.50 | 6.27 | 6.27 | 6.19 | 6.14 | 5.82 | 5.64 | 5.48 | 5.21 | 5.02 |
| 183.07  | 6.17 | 6.10 | 6.16 | 6.11 | 6.17 | 6.01 | 6.02 | 5.76 | 5.51 | 5.21 | 4.97 |
| 196.47  | 5.91 | 6.13 | 5.97 | 5.94 | 6.00 | 5.89 | 5.82 | 5.51 | 5.39 | 5.15 | 4.94 |
| 210.91  | 6.12 | 6.21 | 6.07 | 6.12 | 6.16 | 5.99 | 5.89 | 5.68 | 5.50 | 5.21 | 5.06 |
| 226.50  | 5.84 | 5.90 | 5.82 | 5.94 | 5.93 | 5.82 | 5.77 | 5.42 | 5.36 | 5.11 | 4.80 |
| 243.31  | 5.90 | 5.82 | 5.87 | 5.90 | 5.78 | 5.81 | 5.67 | 5.41 | 5.32 | 5.06 | 4.84 |
| 261.43  | 6.01 | 6.03 | 6.09 | 6.05 | 5.98 | 5.92 | 5.75 | 5.40 | 5.31 | 5.17 | 4.84 |
| 280.98  | 5.75 | 5.92 | 5.96 | 5.82 | 5.77 | 5.70 | 5.70 | 5.50 | 5.16 | 5.06 | 4.83 |
| 302.07  | 5.86 | 5.89 | 5.91 | 5.96 | 5.90 | 5.75 | 5.73 | 5.55 | 5.37 | 5.11 | 4.90 |
| 324.81  | 5.85 | 5.85 | 5.98 | 5.89 | 5.80 | 5.81 | 5.71 | 5.47 | 5.33 | 5.02 | 4.78 |
| 349.33  | 5.44 | 5.68 | 5.70 | 5.86 | 5.79 | 5.69 | 5.57 | 5.48 | 5.26 | 5.07 | 4.77 |
| 375.79  | 5.79 | 5.75 | 5.86 | 5.78 | 5.73 | 5.67 | 5.54 | 5.40 | 5.19 | 5.10 | 4.76 |
| 404.31  | 5.66 | 5.62 | 5.71 | 5.64 | 5.67 | 5.50 | 5.51 | 5.29 | 5.05 | 4.84 | 4.70 |
| 435.08  | 5.93 | 5.94 | 5.89 | 5.73 | 5.83 | 5.67 | 5.58 | 5.33 | 5.20 | 4.84 | 4.72 |
| 468.27  | 5.69 | 5.90 | 5.86 | 5.77 | 5.78 | 5.75 | 5.59 | 5.38 | 5.14 | 5.05 | 4.83 |
| 504.06  | 5.70 | 5.73 | 5.72 | 5.78 | 5.66 | 5.75 | 5.44 | 5.29 | 5.19 | 4.93 | 4.66 |
| 542.66  | 5.82 | 5.87 | 6.03 | 5.94 | 5.86 | 5.91 | 5.72 | 5.55 | 5.26 | 4.98 | 4.73 |
| 584.29  | 5.64 | 5.76 | 5.73 | 5.60 | 5.56 | 5.56 | 5.52 | 5.27 | 5.07 | 4.98 | 4.71 |
| 629.18  | 5.64 | 5.48 | 5.56 | 5.73 | 5.56 | 5.58 | 5.44 | 5.31 | 5.10 | 4.90 | 4.61 |
| 677.61  | 5.74 | 5.73 | 5.77 | 5.76 | 5.65 | 5.67 | 5.50 | 5.35 | 5.09 | 4.93 | 4.70 |
| 729.83  | 5.44 | 5.50 | 5.63 | 5.54 | 5.66 | 5.55 | 5.48 | 5.27 | 5.13 | 4.91 | 4.73 |
| 786.16  | 5.36 | 5.45 | 5.45 | 5.51 | 5.59 | 5.57 | 5.42 | 5.32 | 5.14 | 4.98 | 4.72 |
| 846.90  | 5.38 | 5.56 | 5.55 | 5.64 | 5.65 | 5.63 | 5.44 | 5.32 | 5.09 | 4.78 | 4.55 |
| 912.42  | 5.46 | 5.53 | 5.55 | 5.55 | 5.66 | 5.52 | 5.49 | 5.25 | 5.06 | 4.93 | 4.57 |
| 983.08  | 5.49 | 5.43 | 5.40 | 5.50 | 5.55 | 5.54 | 5.35 | 5.25 | 4.93 | 4.84 | 4.62 |
| 1059.29 | 5.41 | 5.39 | 5.38 | 5.58 | 5.41 | 5.49 | 5.38 | 5.22 | 4.97 | 4.75 | 4.62 |
| 1141.48 | 5.35 | 5.48 | 5.58 | 5.46 | 5.66 | 5.51 | 5.40 | 5.23 | 5.10 | 4.73 | 4.63 |
| 1230.13 | 5.36 | 5.37 | 5.45 | 5.45 | 5.42 | 5.35 | 5.28 | 5.15 | 4.87 | 4.71 | 4.53 |
| 1325.73 | 5.43 | 5.61 | 5.53 | 5.49 | 5.57 | 5.48 | 5.24 | 5.20 | 4.97 | 4.65 | 4.43 |
| 1428.84 | 5.54 | 5.63 | 5.50 | 5.49 | 5.46 | 5.40 | 5.31 | 5.23 | 5.01 | 4.84 | 4.54 |
| 1540.05 | 5.62 | 5.68 | 5.66 | 5.65 | 5.62 | 5.52 | 5.38 | 5.34 | 5.05 | 4.88 | 4.58 |
| 1659.99 | 5.39 | 5.36 | 5.40 | 5.43 | 5.43 | 5.53 | 5.36 | 5.18 | 4.86 | 4.81 | 4.51 |
| 1789.34 | 5.53 | 5.55 | 5.54 | 5.49 | 5.52 | 5.41 | 5.31 | 5.14 | 4.95 | 4.67 | 4.49 |
| 1928.85 | 5.27 | 5.48 | 5.46 | 5.43 | 5.47 | 5.37 | 5.33 | 5.15 | 4.95 | 4.65 | 4.56 |
| 2079.31 | 5.35 | 5.32 | 5.40 | 5.43 | 5.42 | 5.44 | 5.28 | 5.09 | 4.91 | 4.70 | 4.56 |
| 2241.59 | 5.31 | 5.44 | 5.43 | 5.40 | 5.50 | 5.45 | 5.37 | 5.17 | 4.97 | 4.75 | 4.60 |
| 2416.60 | 5.26 | 5.43 | 5.27 | 5.41 | 5.34 | 5.30 | 5.15 | 4.88 | 4.84 | 4.63 | 4.48 |
| 2605.36 | 5.19 | 5.28 | 5.27 | 5.33 | 5.25 | 5.24 | 5.15 | 4.87 | 4.84 | 4.57 | 4.41 |
| 2808.94 | 5.12 | 5.40 | 5.42 | 5.37 | 5.37 | 5.31 | 5.17 | 4.98 | 4.73 | 4.48 | 4.32 |

|         |      |      |      |      |      |      |      |      |      |      |      |
|---------|------|------|------|------|------|------|------|------|------|------|------|
| 3028.50 | 5.07 | 5.11 | 5.08 | 5.17 | 5.24 | 5.15 | 5.06 | 4.90 | 4.66 | 4.48 | 4.26 |
| 3265.30 | 5.03 | 5.08 | 5.26 | 5.08 | 5.19 | 5.15 | 5.20 | 4.90 | 4.76 | 4.52 | 4.42 |
| 3520.69 | 5.16 | 5.17 | 5.20 | 5.27 | 5.15 | 5.27 | 5.02 | 4.92 | 4.72 | 4.48 | 4.30 |
| 3796.13 | 5.00 | 5.30 | 5.26 | 5.18 | 5.26 | 5.11 | 5.08 | 4.89 | 4.76 | 4.58 | 4.43 |

| Wavelength<br>(nm) | 428.08 | 429.50 | 430.92 | 432.35 | 433.77 | 435.20 | 436.62 | 438.05 | 439.47 | 440.89 | 442.32 |
|--------------------|--------|--------|--------|--------|--------|--------|--------|--------|--------|--------|--------|
| Time<br>(ps)       |        |        |        |        |        |        |        |        |        |        |        |
| -3.78              | -0.06  | -0.05  | 0.01   | -0.02  | 0.06   | 0.01   | 0.01   | -0.08  | 0.05   | 0.06   | 0.07   |
| -3.28              | -0.07  | 0.07   | -0.04  | 0.00   | -0.09  | -0.11  | -0.03  | -0.03  | 0.08   | 0.06   | 0.01   |
| -2.78              | 0.08   | 0.28   | 0.08   | 0.03   | 0.11   | 0.07   | 0.11   | 0.13   | 0.09   | -0.07  | -0.07  |
| -2.28              | 0.01   | -0.07  | -0.08  | 0.01   | -0.01  | 0.05   | -0.02  | -0.01  | -0.10  | -0.03  | 0.02   |
| -1.78              | 0.01   | -0.05  | 0.10   | 0.06   | 0.05   | 0.04   | 0.08   | 0.04   | 0.06   | 0.11   | -0.08  |
| -1.28              | -0.04  | -0.12  | -0.02  | 0.04   | -0.07  | 0.02   | -0.04  | 0.00   | -0.06  | -0.09  | 0.01   |
| -0.78              | 0.00   | -0.08  | -0.03  | -0.12  | -0.04  | -0.01  | -0.08  | -0.04  | -0.10  | -0.10  | -0.01  |
| -0.28              | 0.07   | 0.02   | -0.01  | -0.01  | -0.02  | -0.07  | -0.03  | 0.00   | -0.02  | 0.06   | 0.06   |
| -0.18              | -0.05  | -0.06  | 0.05   | 0.09   | 0.01   | -0.05  | 0.00   | 0.02   | 0.02   | 0.06   | 0.10   |
| -0.08              | -0.02  | -0.01  | -0.15  | -0.02  | 0.13   | 0.02   | -0.02  | 0.01   | 0.06   | -0.04  | 0.00   |
| 0.02               | -0.06  | -0.01  | 0.07   | 0.07   | -0.09  | 0.04   | 0.06   | -0.11  | 0.04   | 0.08   | 0.05   |
| 0.12               | -0.06  | -0.08  | -0.03  | -0.03  | 0.02   | 0.02   | 0.04   | -0.04  | 0.06   | 0.11   | 0.07   |
| 0.22               | 0.00   | -0.09  | 0.06   | -0.04  | -0.06  | -0.05  | 0.04   | -0.08  | -0.07  | -0.17  | -0.09  |
| 0.27               | 0.00   | -0.05  | 0.01   | -0.02  | 0.12   | -0.09  | -0.09  | 0.08   | -0.07  | 0.05   | 0.14   |
| 0.32               | 0.02   | 0.00   | 0.05   | 0.01   | 0.14   | 0.04   | 0.11   | 0.07   | 0.17   | 0.08   | 0.16   |
| 0.37               | 0.03   | 0.03   | -0.07  | 0.08   | 0.12   | 0.07   | 0.01   | 0.00   | 0.03   | 0.00   | -0.02  |
| 0.42               | 0.08   | 0.11   | 0.02   | 0.11   | 0.03   | -0.04  | 0.12   | 0.07   | 0.10   | 0.07   | 0.05   |
| 0.47               | 0.09   | 0.04   | 0.01   | 0.07   | -0.08  | 0.02   | -0.09  | -0.09  | -0.03  | -0.06  | 0.03   |
| 0.52               | -0.09  | -0.14  | -0.01  | -0.09  | -0.03  | -0.12  | -0.09  | 0.08   | -0.15  | -0.02  | -0.11  |
| 0.57               | -0.09  | -0.03  | 0.00   | 0.12   | 0.01   | 0.17   | 0.09   | 0.03   | 0.15   | 0.09   | 0.15   |
| 0.62               | -0.05  | 0.03   | -0.03  | 0.04   | 0.12   | 0.03   | -0.02  | 0.01   | 0.02   | 0.06   | 0.00   |
| 0.67               | 0.06   | -0.15  | 0.05   | 0.03   | 0.03   | 0.12   | -0.04  | 0.03   | -0.02  | -0.05  | -0.04  |
| 0.72               | -0.06  | 0.04   | 0.07   | 0.03   | 0.10   | 0.02   | 0.16   | 0.02   | 0.04   | 0.02   | 0.16   |
| 0.77               | -0.05  | -0.04  | 0.02   | 0.09   | 0.05   | -0.06  | -0.10  | 0.01   | -0.16  | 0.00   | 0.03   |
| 0.82               | 0.09   | -0.05  | 0.08   | -0.09  | 0.08   | -0.01  | -0.04  | -0.03  | -0.05  | 0.01   | 0.06   |
| 0.87               | -0.10  | -0.10  | 0.02   | 0.11   | 0.00   | 0.00   | 0.01   | 0.06   | -0.04  | 0.03   | 0.06   |
| 0.92               | -0.52  | -0.66  | -0.31  | -0.05  | -0.04  | -0.12  | -0.06  | -0.13  | 0.00   | -0.22  | -0.14  |
| 0.97               | -35.54 | -25.68 | -17.61 | -10.49 | -4.24  | -0.34  | 1.03   | 0.76   | 0.25   | -0.06  | -0.16  |
| 1.02               | 95.86  | 63.64  | 30.41  | -0.87  | -25.81 | -42.37 | -49.72 | -49.43 | -44.06 | -36.21 | -27.83 |
| 1.07               | 33.04  | 70.77  | 107.85 | 140.15 | 163.99 | 175.37 | 173.65 | 159.22 | 135.12 | 105.72 | 74.30  |
| 1.12               | 13.58  | 5.49   | -12.17 | -36.06 | -59.23 | -74.43 | -76.83 | -65.56 | -42.81 | -12.34 | 22.14  |
| 1.17               | 9.56   | 9.82   | 11.27  | 13.09  | 14.34  | 13.81  | 11.74  | 10.21  | 10.65  | 11.99  | 11.31  |
| 1.22               | 11.63  | 11.07  | 10.30  | 9.58   | 9.41   | 9.37   | 9.30   | 8.31   | 6.69   | 5.02   | 4.25   |
| 1.27               | 10.66  | 10.77  | 10.43  | 9.39   | 8.03   | 6.74   | 6.24   | 6.90   | 7.50   | 7.87   | 7.63   |
| 1.32               | 8.80   | 8.12   | 7.99   | 8.31   | 8.76   | 8.39   | 7.49   | 6.31   | 5.69   | 5.67   | 6.22   |
| 1.37               | 9.28   | 9.02   | 8.32   | 7.48   | 7.00   | 6.74   | 7.20   | 7.55   | 7.32   | 6.34   | 5.05   |
| 1.42               | 8.21   | 8.14   | 8.29   | 8.15   | 7.65   | 6.68   | 5.82   | 5.37   | 5.44   | 5.52   | 5.29   |
| 1.47               | 8.76   | 8.02   | 7.42   | 7.24   | 7.45   | 7.49   | 7.08   | 6.01   | 4.71   | 3.95   | 3.78   |
| 1.52               | 8.61   | 8.39   | 7.61   | 6.72   | 6.15   | 5.75   | 5.96   | 6.19   | 6.24   | 5.52   | 4.55   |
| 1.57               | 7.23   | 7.20   | 7.34   | 7.38   | 7.13   | 6.36   | 5.27   | 4.80   | 4.69   | 4.97   | 5.14   |
| 1.62               | 7.88   | 7.19   | 6.67   | 6.67   | 6.68   | 6.97   | 6.69   | 5.91   | 4.53   | 3.53   | 3.01   |

|      |      |      |      |      |      |      |      |      |      |      |      |
|------|------|------|------|------|------|------|------|------|------|------|------|
| 1.67 | 8.07 | 7.95 | 7.50 | 6.80 | 5.90 | 5.33 | 5.21 | 5.21 | 5.33 | 4.82 | 4.00 |
| 1.72 | 7.29 | 6.86 | 6.57 | 6.67 | 6.53 | 6.07 | 5.41 | 4.60 | 4.08 | 3.89 | 4.27 |
| 1.77 | 7.78 | 7.26 | 6.65 | 5.96 | 5.72 | 5.52 | 5.83 | 5.75 | 5.21 | 4.31 | 3.32 |
| 1.82 | 7.07 | 7.05 | 7.15 | 6.79 | 6.06 | 5.32 | 4.53 | 4.32 | 4.42 | 4.48 | 4.03 |
| 1.87 | 7.25 | 6.69 | 6.41 | 6.39 | 6.39 | 5.95 | 5.45 | 4.59 | 3.94 | 3.50 | 3.53 |
| 1.92 | 7.64 | 7.24 | 6.72 | 6.02 | 5.51 | 5.10 | 5.10 | 5.20 | 5.10 | 4.41 | 3.69 |
| 1.97 | 6.78 | 6.63 | 6.48 | 6.63 | 6.39 | 5.64 | 4.93 | 4.39 | 4.16 | 4.11 | 4.04 |
| 2.02 | 7.35 | 6.98 | 6.51 | 6.11 | 5.89 | 5.58 | 5.46 | 5.00 | 4.33 | 3.61 | 3.01 |
| 2.07 | 7.18 | 7.07 | 6.52 | 5.94 | 5.46 | 4.94 | 4.78 | 4.91 | 4.81 | 4.34 | 3.59 |
| 2.12 | 6.60 | 6.25 | 6.09 | 5.99 | 5.82 | 5.35 | 4.79 | 4.05 | 3.62 | 3.47 | 3.44 |
| 2.17 | 6.84 | 6.26 | 5.97 | 5.58 | 5.40 | 5.21 | 5.10 | 4.70 | 4.09 | 3.31 | 2.74 |
| 2.22 | 6.84 | 6.70 | 6.56 | 6.20 | 5.78 | 4.98 | 4.51 | 4.23 | 4.17 | 4.10 | 3.76 |
| 2.27 | 6.66 | 6.30 | 5.83 | 5.83 | 5.64 | 5.43 | 5.15 | 4.32 | 3.81 | 3.39 | 3.23 |
| 2.32 | 6.78 | 6.58 | 6.10 | 5.56 | 5.15 | 4.89 | 4.81 | 4.77 | 4.42 | 3.82 | 3.11 |
| 2.37 | 6.44 | 6.33 | 6.19 | 6.03 | 5.74 | 5.10 | 4.47 | 4.05 | 3.71 | 3.72 | 3.57 |
| 2.42 | 6.66 | 6.14 | 5.77 | 5.68 | 5.43 | 5.20 | 4.89 | 4.19 | 3.68 | 3.15 | 2.79 |
| 2.47 | 6.72 | 6.45 | 5.97 | 5.62 | 5.19 | 4.77 | 4.60 | 4.60 | 4.23 | 3.76 | 3.25 |
| 2.52 | 6.45 | 6.25 | 5.94 | 5.89 | 5.63 | 5.17 | 4.72 | 4.14 | 3.69 | 3.46 | 3.35 |
| 2.57 | 6.72 | 6.31 | 5.95 | 5.59 | 5.38 | 5.16 | 4.91 | 4.49 | 4.03 | 3.38 | 2.92 |
| 2.62 | 6.53 | 6.43 | 6.17 | 5.76 | 5.24 | 4.72 | 4.39 | 4.17 | 4.02 | 3.64 | 3.33 |
| 2.67 | 6.40 | 6.05 | 5.85 | 5.54 | 5.42 | 5.09 | 4.61 | 3.96 | 3.64 | 3.29 | 3.22 |
| 2.72 | 6.71 | 6.25 | 5.95 | 5.43 | 5.17 | 4.99 | 4.73 | 4.58 | 4.10 | 3.68 | 2.98 |
| 2.77 | 6.45 | 6.34 | 6.06 | 5.61 | 5.33 | 4.84 | 4.40 | 4.09 | 3.70 | 3.52 | 3.32 |
| 2.82 | 6.32 | 6.10 | 5.70 | 5.47 | 5.25 | 4.95 | 4.54 | 4.06 | 3.64 | 3.25 | 2.98 |
| 2.87 | 6.36 | 6.22 | 5.88 | 5.40 | 4.96 | 4.73 | 4.44 | 4.18 | 3.90 | 3.60 | 3.04 |
| 2.92 | 6.32 | 5.99 | 5.85 | 5.69 | 5.50 | 5.03 | 4.47 | 3.96 | 3.66 | 3.35 | 3.19 |
| 2.97 | 6.59 | 6.31 | 5.77 | 5.38 | 5.19 | 4.95 | 4.69 | 4.27 | 3.82 | 3.20 | 2.99 |
| 3.02 | 6.42 | 6.20 | 5.97 | 5.58 | 5.23 | 4.77 | 4.44 | 4.19 | 3.94 | 3.67 | 3.19 |
| 3.07 | 6.36 | 5.97 | 5.78 | 5.51 | 5.24 | 4.83 | 4.40 | 4.00 | 3.67 | 3.36 | 2.98 |
| 3.12 | 6.37 | 5.95 | 5.56 | 5.24 | 4.92 | 4.77 | 4.41 | 4.23 | 3.74 | 3.20 | 2.76 |
| 3.17 | 6.51 | 6.21 | 5.90 | 5.65 | 5.35 | 4.82 | 4.28 | 3.90 | 3.70 | 3.43 | 3.12 |
| 3.22 | 6.49 | 6.16 | 5.80 | 5.53 | 5.31 | 4.99 | 4.66 | 4.30 | 3.77 | 3.34 | 3.02 |
| 3.42 | 6.36 | 6.15 | 5.81 | 5.40 | 5.05 | 4.66 | 4.26 | 4.04 | 3.78 | 3.46 | 3.02 |
| 3.62 | 6.55 | 6.03 | 5.75 | 5.54 | 5.21 | 4.92 | 4.38 | 4.03 | 3.57 | 3.24 | 3.01 |
| 3.82 | 6.37 | 5.96 | 5.76 | 5.45 | 5.11 | 4.67 | 4.50 | 4.06 | 3.92 | 3.47 | 3.01 |
| 4.02 | 6.28 | 5.92 | 5.67 | 5.47 | 5.20 | 4.82 | 4.45 | 4.05 | 3.61 | 3.21 | 2.95 |
| 4.22 | 6.24 | 5.97 | 5.70 | 5.34 | 5.06 | 4.71 | 4.32 | 4.01 | 3.74 | 3.16 | 2.90 |
| 4.42 | 6.23 | 6.03 | 5.79 | 5.40 | 5.15 | 4.79 | 4.38 | 3.95 | 3.68 | 3.18 | 3.01 |
| 4.62 | 6.32 | 5.83 | 5.54 | 5.24 | 4.84 | 4.49 | 4.26 | 3.97 | 3.55 | 3.05 | 2.81 |
| 4.82 | 6.12 | 5.81 | 5.57 | 5.31 | 4.98 | 4.60 | 4.20 | 3.91 | 3.59 | 3.23 | 2.93 |
| 5.02 | 6.13 | 5.87 | 5.55 | 5.36 | 4.89 | 4.49 | 4.26 | 3.89 | 3.49 | 3.06 | 2.85 |
| 5.22 | 6.07 | 5.90 | 5.53 | 5.23 | 4.95 | 4.65 | 4.35 | 3.92 | 3.67 | 3.30 | 2.92 |
| 5.42 | 5.90 | 5.72 | 5.45 | 5.25 | 4.97 | 4.47 | 4.21 | 3.75 | 3.51 | 3.11 | 2.78 |
| 5.62 | 6.03 | 5.67 | 5.45 | 5.13 | 4.79 | 4.47 | 4.16 | 3.71 | 3.36 | 3.10 | 2.72 |
| 5.82 | 5.89 | 5.58 | 5.32 | 5.03 | 4.68 | 4.40 | 4.00 | 3.74 | 3.38 | 3.02 | 2.64 |
| 6.02 | 5.95 | 5.60 | 5.38 | 5.10 | 4.88 | 4.46 | 4.06 | 3.68 | 3.46 | 3.07 | 2.86 |
| 6.22 | 5.87 | 5.70 | 5.33 | 5.14 | 4.86 | 4.39 | 4.12 | 3.69 | 3.43 | 2.95 | 2.73 |
| 6.42 | 5.87 | 5.62 | 5.21 | 4.97 | 4.75 | 4.25 | 4.00 | 3.60 | 3.30 | 2.98 | 2.68 |
| 6.62 | 5.90 | 5.78 | 5.52 | 5.09 | 4.82 | 4.48 | 4.26 | 3.92 | 3.52 | 3.09 | 2.69 |
| 6.82 | 5.82 | 5.54 | 5.26 | 5.01 | 4.78 | 4.23 | 4.10 | 3.67 | 3.31 | 2.80 | 2.63 |



|       |      |      |      |      |      |      |      |      |      |      |      |
|-------|------|------|------|------|------|------|------|------|------|------|------|
| 7.02  | 6.05 | 5.77 | 5.37 | 5.13 | 4.91 | 4.45 | 4.12 | 3.68 | 3.35 | 3.01 | 2.64 |
| 7.22  | 5.93 | 5.56 | 5.36 | 5.07 | 4.78 | 4.39 | 4.05 | 3.70 | 3.38 | 3.06 | 2.81 |
| 7.42  | 5.89 | 5.61 | 5.29 | 4.95 | 4.74 | 4.33 | 4.00 | 3.75 | 3.36 | 2.96 | 2.67 |
| 7.62  | 5.89 | 5.71 | 5.37 | 4.97 | 4.71 | 4.41 | 4.10 | 3.86 | 3.48 | 3.10 | 2.79 |
| 7.82  | 5.71 | 5.56 | 5.21 | 4.96 | 4.61 | 4.24 | 3.96 | 3.56 | 3.25 | 2.97 | 2.65 |
| 8.02  | 5.83 | 5.50 | 5.31 | 4.88 | 4.61 | 4.23 | 3.95 | 3.59 | 3.26 | 2.93 | 2.50 |
| 8.22  | 5.64 | 5.43 | 5.23 | 4.96 | 4.58 | 4.17 | 4.02 | 3.59 | 3.27 | 2.87 | 2.67 |
| 8.42  | 5.74 | 5.43 | 5.19 | 5.04 | 4.58 | 4.21 | 3.82 | 3.61 | 3.22 | 2.74 | 2.45 |
| 8.62  | 5.61 | 5.39 | 5.16 | 4.96 | 4.50 | 4.25 | 3.93 | 3.72 | 3.46 | 3.00 | 2.61 |
| 8.82  | 5.79 | 5.46 | 5.23 | 4.99 | 4.59 | 4.24 | 4.05 | 3.70 | 3.35 | 3.02 | 2.63 |
| 9.02  | 5.76 | 5.44 | 5.18 | 4.79 | 4.57 | 4.20 | 3.83 | 3.56 | 3.28 | 2.90 | 2.61 |
| 9.22  | 5.65 | 5.55 | 5.17 | 4.76 | 4.54 | 4.20 | 4.01 | 3.54 | 3.17 | 2.86 | 2.59 |
| 9.42  | 5.76 | 5.49 | 5.05 | 4.78 | 4.49 | 4.19 | 3.90 | 3.43 | 3.11 | 2.76 | 2.50 |
| 9.62  | 5.70 | 5.35 | 5.14 | 4.87 | 4.63 | 4.23 | 3.96 | 3.62 | 3.13 | 2.87 | 2.51 |
| 9.82  | 5.59 | 5.54 | 5.23 | 4.85 | 4.62 | 4.25 | 4.00 | 3.63 | 3.31 | 2.87 | 2.60 |
| 10.02 | 5.69 | 5.24 | 5.06 | 4.83 | 4.50 | 4.08 | 3.84 | 3.45 | 3.17 | 2.69 | 2.45 |
| 10.22 | 5.76 | 5.51 | 5.12 | 4.86 | 4.57 | 4.17 | 3.91 | 3.57 | 3.24 | 2.81 | 2.45 |
| 10.42 | 5.52 | 5.34 | 5.11 | 4.83 | 4.49 | 4.10 | 3.83 | 3.61 | 3.21 | 2.90 | 2.47 |
| 10.62 | 5.72 | 5.51 | 5.21 | 4.87 | 4.65 | 4.23 | 3.95 | 3.58 | 3.27 | 3.02 | 2.62 |
| 10.82 | 5.81 | 5.54 | 5.05 | 4.95 | 4.53 | 4.29 | 3.90 | 3.58 | 3.25 | 2.88 | 2.59 |
| 11.02 | 5.59 | 5.33 | 5.11 | 4.91 | 4.48 | 4.24 | 3.76 | 3.53 | 3.18 | 2.80 | 2.55 |
| 11.22 | 5.50 | 5.22 | 4.89 | 4.61 | 4.37 | 4.00 | 3.65 | 3.48 | 2.97 | 2.70 | 2.41 |
| 11.42 | 5.51 | 5.15 | 4.84 | 4.63 | 4.44 | 4.02 | 3.69 | 3.45 | 3.00 | 2.70 | 2.40 |
| 11.62 | 5.46 | 5.29 | 4.98 | 4.67 | 4.46 | 3.98 | 3.82 | 3.41 | 3.11 | 2.78 | 2.46 |
| 11.82 | 5.49 | 5.24 | 5.01 | 4.65 | 4.45 | 3.98 | 3.69 | 3.44 | 3.06 | 2.80 | 2.40 |
| 12.02 | 5.52 | 5.23 | 5.06 | 4.71 | 4.45 | 4.21 | 3.87 | 3.52 | 3.07 | 2.80 | 2.50 |
| 12.22 | 5.64 | 5.39 | 5.09 | 4.87 | 4.59 | 4.21 | 4.01 | 3.56 | 3.32 | 2.88 | 2.57 |
| 12.42 | 5.52 | 5.23 | 4.99 | 4.69 | 4.52 | 4.04 | 3.75 | 3.37 | 3.05 | 2.81 | 2.45 |
| 12.62 | 5.62 | 5.28 | 4.98 | 4.64 | 4.40 | 4.03 | 3.72 | 3.32 | 3.13 | 2.84 | 2.59 |
| 12.82 | 5.42 | 5.21 | 4.92 | 4.65 | 4.25 | 3.97 | 3.67 | 3.28 | 2.89 | 2.63 | 2.36 |
| 13.02 | 5.60 | 5.34 | 5.07 | 4.64 | 4.52 | 4.09 | 3.90 | 3.46 | 3.19 | 2.76 | 2.54 |
| 13.22 | 5.45 | 5.13 | 4.96 | 4.66 | 4.43 | 3.97 | 3.55 | 3.48 | 3.01 | 2.78 | 2.39 |
| 13.42 | 5.47 | 5.28 | 4.96 | 4.56 | 4.37 | 4.00 | 3.83 | 3.47 | 3.10 | 2.82 | 2.47 |
| 13.50 | 5.41 | 5.11 | 4.78 | 4.50 | 4.30 | 3.89 | 3.58 | 3.25 | 3.01 | 2.65 | 2.40 |
| 13.59 | 5.60 | 5.32 | 5.05 | 4.63 | 4.49 | 4.13 | 3.83 | 3.53 | 3.15 | 2.77 | 2.53 |
| 13.68 | 5.38 | 5.18 | 4.83 | 4.55 | 4.30 | 3.86 | 3.65 | 3.34 | 2.95 | 2.59 | 2.44 |
| 13.78 | 5.35 | 5.19 | 4.84 | 4.52 | 4.25 | 3.96 | 3.56 | 3.31 | 3.03 | 2.58 | 2.29 |
| 13.88 | 5.43 | 5.15 | 4.89 | 4.62 | 4.34 | 4.16 | 3.74 | 3.42 | 3.09 | 2.81 | 2.45 |
| 14.00 | 5.46 | 5.21 | 4.95 | 4.63 | 4.43 | 3.98 | 3.73 | 3.44 | 3.09 | 2.83 | 2.51 |
| 14.12 | 5.39 | 5.18 | 5.00 | 4.65 | 4.26 | 3.91 | 3.64 | 3.21 | 3.06 | 2.64 | 2.35 |
| 14.25 | 5.26 | 4.94 | 4.79 | 4.44 | 4.28 | 3.95 | 3.52 | 3.34 | 2.95 | 2.66 | 2.22 |
| 14.40 | 5.53 | 5.35 | 4.99 | 4.63 | 4.38 | 3.96 | 3.82 | 3.38 | 3.00 | 2.82 | 2.42 |
| 14.55 | 5.35 | 5.07 | 4.81 | 4.60 | 4.32 | 3.95 | 3.67 | 3.30 | 2.98 | 2.62 | 2.33 |
| 14.72 | 5.29 | 4.93 | 4.78 | 4.42 | 4.13 | 3.77 | 3.63 | 3.31 | 2.97 | 2.69 | 2.36 |
| 14.90 | 5.28 | 5.13 | 4.78 | 4.47 | 4.28 | 3.82 | 3.69 | 3.23 | 3.05 | 2.67 | 2.38 |
| 15.09 | 5.30 | 5.04 | 4.74 | 4.47 | 4.20 | 3.91 | 3.53 | 3.23 | 2.91 | 2.58 | 2.27 |
| 15.30 | 5.28 | 5.13 | 4.87 | 4.47 | 4.28 | 3.95 | 3.68 | 3.31 | 2.94 | 2.75 | 2.41 |
| 15.53 | 5.48 | 5.14 | 5.00 | 4.63 | 4.34 | 4.01 | 3.70 | 3.30 | 2.96 | 2.63 | 2.35 |
| 15.77 | 5.28 | 5.11 | 4.70 | 4.49 | 4.25 | 3.84 | 3.54 | 3.26 | 2.95 | 2.68 | 2.26 |
| 16.04 | 5.62 | 5.25 | 4.94 | 4.63 | 4.46 | 4.06 | 3.76 | 3.47 | 3.19 | 2.81 | 2.46 |

|        |      |      |      |      |      |      |      |      |      |      |      |
|--------|------|------|------|------|------|------|------|------|------|------|------|
| 16.32  | 5.33 | 4.95 | 4.79 | 4.48 | 4.23 | 3.97 | 3.59 | 3.25 | 2.98 | 2.59 | 2.23 |
| 16.63  | 5.54 | 5.25 | 4.85 | 4.69 | 4.25 | 3.91 | 3.71 | 3.39 | 3.15 | 2.75 | 2.45 |
| 16.96  | 5.50 | 5.11 | 4.94 | 4.51 | 4.17 | 3.81 | 3.62 | 3.30 | 2.96 | 2.59 | 2.23 |
| 17.31  | 5.35 | 5.03 | 4.85 | 4.52 | 4.35 | 3.96 | 3.73 | 3.31 | 2.96 | 2.68 | 2.41 |
| 17.70  | 5.51 | 5.16 | 4.94 | 4.63 | 4.35 | 3.96 | 3.74 | 3.39 | 3.07 | 2.73 | 2.36 |
| 18.11  | 5.29 | 4.93 | 4.69 | 4.41 | 4.14 | 3.73 | 3.50 | 3.20 | 2.86 | 2.46 | 2.30 |
| 18.56  | 5.38 | 5.11 | 4.71 | 4.48 | 4.40 | 3.91 | 3.57 | 3.25 | 2.85 | 2.66 | 2.33 |
| 19.04  | 5.29 | 4.99 | 4.78 | 4.41 | 4.07 | 3.80 | 3.44 | 3.27 | 2.82 | 2.55 | 2.21 |
| 19.56  | 5.45 | 5.07 | 4.90 | 4.68 | 4.34 | 4.01 | 3.69 | 3.37 | 3.01 | 2.74 | 2.43 |
| 20.12  | 5.34 | 5.06 | 4.85 | 4.52 | 4.17 | 3.92 | 3.54 | 3.22 | 2.90 | 2.49 | 2.35 |
| 20.72  | 5.36 | 5.10 | 4.91 | 4.58 | 4.38 | 3.97 | 3.76 | 3.37 | 3.08 | 2.73 | 2.48 |
| 21.37  | 5.42 | 5.01 | 4.66 | 4.47 | 4.27 | 3.87 | 3.59 | 3.26 | 2.91 | 2.59 | 2.17 |
| 22.08  | 5.54 | 5.18 | 4.89 | 4.54 | 4.26 | 3.94 | 3.60 | 3.17 | 2.98 | 2.46 | 2.32 |
| 22.84  | 5.50 | 5.10 | 4.84 | 4.65 | 4.27 | 3.97 | 3.64 | 3.31 | 3.01 | 2.63 | 2.33 |
| 23.65  | 5.24 | 4.87 | 4.57 | 4.30 | 4.04 | 3.88 | 3.49 | 3.15 | 2.88 | 2.45 | 2.23 |
| 24.54  | 5.26 | 4.94 | 4.61 | 4.32 | 4.17 | 3.75 | 3.51 | 3.13 | 2.77 | 2.51 | 2.23 |
| 25.49  | 5.32 | 5.00 | 4.87 | 4.45 | 4.26 | 3.86 | 3.66 | 3.22 | 3.03 | 2.56 | 2.25 |
| 26.51  | 5.08 | 4.76 | 4.47 | 4.18 | 3.91 | 3.60 | 3.29 | 2.91 | 2.69 | 2.27 | 1.95 |
| 27.62  | 5.25 | 4.94 | 4.71 | 4.45 | 4.26 | 3.73 | 3.47 | 3.12 | 2.84 | 2.45 | 2.17 |
| 28.81  | 5.13 | 4.86 | 4.70 | 4.40 | 4.11 | 3.71 | 3.51 | 3.12 | 2.82 | 2.52 | 2.28 |
| 30.10  | 5.03 | 4.75 | 4.63 | 4.15 | 3.93 | 3.65 | 3.28 | 3.00 | 2.80 | 2.44 | 2.01 |
| 31.49  | 5.25 | 4.98 | 4.75 | 4.41 | 4.14 | 3.73 | 3.55 | 3.17 | 2.98 | 2.57 | 2.27 |
| 32.98  | 5.23 | 4.88 | 4.66 | 4.35 | 4.06 | 3.71 | 3.41 | 3.20 | 2.89 | 2.55 | 2.24 |
| 34.60  | 5.13 | 4.86 | 4.58 | 4.32 | 4.06 | 3.72 | 3.47 | 3.07 | 2.73 | 2.39 | 2.05 |
| 36.34  | 5.05 | 4.85 | 4.47 | 4.24 | 4.01 | 3.62 | 3.33 | 2.97 | 2.69 | 2.38 | 2.08 |
| 38.21  | 5.18 | 4.92 | 4.60 | 4.38 | 4.18 | 3.80 | 3.45 | 3.20 | 2.81 | 2.40 | 2.26 |
| 40.24  | 5.09 | 4.87 | 4.58 | 4.34 | 3.97 | 3.61 | 3.29 | 3.06 | 2.77 | 2.38 | 2.05 |
| 42.42  | 4.95 | 4.66 | 4.41 | 4.19 | 3.89 | 3.61 | 3.25 | 2.97 | 2.56 | 2.27 | 1.96 |
| 44.78  | 4.96 | 4.59 | 4.45 | 4.08 | 3.88 | 3.41 | 3.26 | 2.92 | 2.72 | 2.30 | 2.05 |
| 47.32  | 4.81 | 4.49 | 4.26 | 4.06 | 3.77 | 3.34 | 3.19 | 2.89 | 2.58 | 2.27 | 1.88 |
| 50.06  | 4.99 | 4.75 | 4.50 | 4.23 | 3.96 | 3.62 | 3.38 | 3.22 | 2.82 | 2.47 | 2.14 |
| 53.01  | 4.97 | 4.72 | 4.37 | 4.09 | 3.83 | 3.42 | 3.15 | 2.91 | 2.55 | 2.18 | 1.96 |
| 56.20  | 5.00 | 4.73 | 4.46 | 4.12 | 3.92 | 3.57 | 3.26 | 2.98 | 2.56 | 2.24 | 2.03 |
| 59.64  | 5.01 | 4.70 | 4.51 | 4.10 | 3.79 | 3.51 | 3.22 | 2.90 | 2.64 | 2.31 | 2.00 |
| 63.34  | 4.86 | 4.48 | 4.26 | 3.98 | 3.84 | 3.36 | 3.11 | 2.76 | 2.56 | 2.18 | 1.86 |
| 67.34  | 4.91 | 4.59 | 4.28 | 3.99 | 3.88 | 3.50 | 3.18 | 2.90 | 2.63 | 2.34 | 1.97 |
| 71.65  | 4.89 | 4.55 | 4.24 | 3.99 | 3.66 | 3.41 | 3.08 | 2.79 | 2.47 | 2.12 | 1.84 |
| 76.30  | 4.85 | 4.62 | 4.30 | 4.03 | 3.84 | 3.46 | 3.11 | 2.84 | 2.51 | 2.21 | 2.00 |
| 81.32  | 4.99 | 4.61 | 4.34 | 4.14 | 3.79 | 3.54 | 3.20 | 2.92 | 2.63 | 2.29 | 1.96 |
| 86.73  | 4.80 | 4.52 | 4.31 | 4.02 | 3.75 | 3.51 | 3.18 | 2.81 | 2.50 | 2.32 | 2.04 |
| 92.56  | 4.70 | 4.55 | 4.34 | 4.14 | 3.78 | 3.45 | 3.15 | 2.93 | 2.59 | 2.28 | 1.98 |
| 98.85  | 4.84 | 4.49 | 4.30 | 4.07 | 3.74 | 3.35 | 3.13 | 2.75 | 2.56 | 2.13 | 1.90 |
| 105.64 | 4.74 | 4.47 | 4.30 | 4.04 | 3.70 | 3.38 | 3.21 | 2.87 | 2.56 | 2.21 | 1.98 |
| 112.96 | 4.68 | 4.51 | 4.21 | 4.00 | 3.80 | 3.34 | 3.17 | 2.88 | 2.57 | 2.26 | 1.90 |
| 120.85 | 4.82 | 4.46 | 4.28 | 4.01 | 3.77 | 3.25 | 3.05 | 2.75 | 2.48 | 2.22 | 1.91 |
| 129.36 | 4.79 | 4.67 | 4.34 | 4.01 | 3.78 | 3.47 | 3.14 | 2.93 | 2.57 | 2.29 | 2.10 |
| 138.55 | 4.88 | 4.75 | 4.38 | 4.11 | 3.94 | 3.54 | 3.30 | 2.94 | 2.56 | 2.26 | 2.10 |
| 148.45 | 4.72 | 4.53 | 4.33 | 4.01 | 3.72 | 3.44 | 3.00 | 2.77 | 2.49 | 2.15 | 1.96 |
| 159.13 | 4.73 | 4.45 | 4.33 | 3.99 | 3.71 | 3.42 | 3.11 | 2.79 | 2.53 | 2.14 | 1.90 |
| 170.65 | 4.70 | 4.44 | 4.21 | 3.85 | 3.62 | 3.20 | 2.87 | 2.72 | 2.39 | 2.09 | 1.82 |

|         |      |      |      |      |      |      |      |      |      |      |      |
|---------|------|------|------|------|------|------|------|------|------|------|------|
| 183.07  | 4.79 | 4.52 | 4.25 | 4.05 | 3.79 | 3.41 | 3.09 | 2.86 | 2.42 | 2.26 | 1.92 |
| 196.47  | 4.71 | 4.47 | 4.02 | 3.79 | 3.58 | 3.31 | 3.03 | 2.84 | 2.42 | 2.14 | 1.88 |
| 210.91  | 4.67 | 4.44 | 4.25 | 3.89 | 3.65 | 3.26 | 3.05 | 2.65 | 2.41 | 2.21 | 1.90 |
| 226.50  | 4.62 | 4.39 | 4.21 | 3.89 | 3.76 | 3.35 | 3.00 | 2.73 | 2.47 | 2.27 | 1.97 |
| 243.31  | 4.64 | 4.31 | 4.06 | 3.88 | 3.56 | 3.34 | 3.06 | 2.73 | 2.43 | 2.14 | 1.87 |
| 261.43  | 4.70 | 4.42 | 4.19 | 3.99 | 3.69 | 3.37 | 3.06 | 2.78 | 2.48 | 2.08 | 1.88 |
| 280.98  | 4.62 | 4.50 | 4.12 | 3.84 | 3.60 | 3.26 | 2.98 | 2.89 | 2.48 | 2.24 | 2.00 |
| 302.07  | 4.72 | 4.46 | 4.27 | 3.92 | 3.76 | 3.35 | 3.08 | 2.84 | 2.48 | 2.26 | 2.12 |
| 324.81  | 4.62 | 4.37 | 4.17 | 3.84 | 3.52 | 3.22 | 2.95 | 2.70 | 2.36 | 1.99 | 1.70 |
| 349.33  | 4.55 | 4.36 | 4.11 | 3.78 | 3.57 | 3.30 | 3.07 | 2.73 | 2.47 | 2.12 | 2.01 |
| 375.79  | 4.64 | 4.29 | 4.18 | 3.87 | 3.61 | 3.24 | 3.00 | 2.73 | 2.47 | 2.11 | 1.84 |
| 404.31  | 4.41 | 4.26 | 3.90 | 3.81 | 3.48 | 3.13 | 3.00 | 2.72 | 2.40 | 2.02 | 1.86 |
| 435.08  | 4.52 | 4.23 | 3.99 | 3.74 | 3.45 | 3.16 | 2.91 | 2.63 | 2.31 | 2.08 | 1.84 |
| 468.27  | 4.60 | 4.20 | 4.13 | 3.80 | 3.51 | 3.27 | 2.99 | 2.71 | 2.39 | 2.09 | 1.82 |
| 504.06  | 4.52 | 4.26 | 4.04 | 3.81 | 3.50 | 3.12 | 2.96 | 2.62 | 2.43 | 2.01 | 1.86 |
| 542.66  | 4.51 | 4.28 | 4.07 | 3.79 | 3.47 | 3.20 | 2.97 | 2.61 | 2.42 | 2.14 | 1.72 |
| 584.29  | 4.48 | 4.26 | 4.08 | 3.78 | 3.52 | 3.20 | 2.94 | 2.72 | 2.37 | 2.23 | 1.79 |
| 629.18  | 4.43 | 4.30 | 4.05 | 3.75 | 3.57 | 3.16 | 2.87 | 2.66 | 2.36 | 2.17 | 1.84 |
| 677.61  | 4.39 | 4.18 | 3.97 | 3.67 | 3.44 | 3.16 | 2.92 | 2.58 | 2.44 | 2.02 | 1.81 |
| 729.83  | 4.54 | 4.14 | 3.95 | 3.67 | 3.54 | 3.22 | 2.95 | 2.63 | 2.44 | 2.10 | 1.83 |
| 786.16  | 4.57 | 4.40 | 4.10 | 3.74 | 3.61 | 3.29 | 3.03 | 2.77 | 2.53 | 2.17 | 1.96 |
| 846.90  | 4.46 | 4.16 | 3.98 | 3.67 | 3.44 | 3.12 | 2.77 | 2.59 | 2.15 | 2.08 | 1.67 |
| 912.42  | 4.43 | 4.17 | 3.90 | 3.65 | 3.38 | 3.03 | 2.81 | 2.43 | 2.29 | 1.99 | 1.75 |
| 983.08  | 4.31 | 4.21 | 3.92 | 3.74 | 3.53 | 3.13 | 2.98 | 2.64 | 2.39 | 1.97 | 1.78 |
| 1059.29 | 4.46 | 4.17 | 3.97 | 3.66 | 3.49 | 3.19 | 2.98 | 2.70 | 2.54 | 2.08 | 1.78 |
| 1141.48 | 4.25 | 4.17 | 3.91 | 3.65 | 3.22 | 3.01 | 2.80 | 2.52 | 2.19 | 1.88 | 1.62 |
| 1230.13 | 4.28 | 4.11 | 3.81 | 3.61 | 3.31 | 3.09 | 2.77 | 2.59 | 2.29 | 2.03 | 1.82 |
| 1325.73 | 4.32 | 4.10 | 3.91 | 3.65 | 3.44 | 3.05 | 2.83 | 2.56 | 2.24 | 1.96 | 1.79 |
| 1428.84 | 4.26 | 4.06 | 3.95 | 3.55 | 3.33 | 3.04 | 2.75 | 2.42 | 2.28 | 1.96 | 1.68 |
| 1540.05 | 4.35 | 4.09 | 3.81 | 3.71 | 3.39 | 3.10 | 2.83 | 2.51 | 2.28 | 1.95 | 1.68 |
| 1659.99 | 4.38 | 4.10 | 3.81 | 3.54 | 3.28 | 2.96 | 2.77 | 2.39 | 2.24 | 1.92 | 1.62 |
| 1789.34 | 4.24 | 3.97 | 3.72 | 3.45 | 3.22 | 2.90 | 2.58 | 2.38 | 2.03 | 1.78 | 1.52 |
| 1928.85 | 4.24 | 3.97 | 3.75 | 3.50 | 3.33 | 2.86 | 2.68 | 2.55 | 2.16 | 1.87 | 1.55 |
| 2079.31 | 4.26 | 4.16 | 3.91 | 3.48 | 3.37 | 2.99 | 2.68 | 2.31 | 2.17 | 1.91 | 1.68 |
| 2241.59 | 4.22 | 4.08 | 3.82 | 3.57 | 3.32 | 2.98 | 2.71 | 2.45 | 2.11 | 1.86 | 1.54 |
| 2416.60 | 4.23 | 3.91 | 3.76 | 3.42 | 3.27 | 2.91 | 2.68 | 2.45 | 2.05 | 1.85 | 1.60 |
| 2605.36 | 4.23 | 4.00 | 3.73 | 3.34 | 3.34 | 2.99 | 2.59 | 2.34 | 2.06 | 1.76 | 1.60 |
| 2808.94 | 4.05 | 3.90 | 3.66 | 3.32 | 3.08 | 2.74 | 2.49 | 2.22 | 1.97 | 1.64 | 1.37 |
| 3028.50 | 4.04 | 3.82 | 3.62 | 3.41 | 3.25 | 2.77 | 2.48 | 2.25 | 1.94 | 1.68 | 1.50 |
| 3265.30 | 4.16 | 3.88 | 3.70 | 3.32 | 3.23 | 2.83 | 2.57 | 2.27 | 2.00 | 1.75 | 1.48 |
| 3520.69 | 4.05 | 3.81 | 3.64 | 3.40 | 3.12 | 2.97 | 2.62 | 2.48 | 2.16 | 1.96 | 1.65 |
| 3796.13 | 4.21 | 3.99 | 3.77 | 3.56 | 3.32 | 2.98 | 2.75 | 2.44 | 2.25 | 1.83 | 1.65 |

| Wavelength (nm) / Time (ps) | 443.74 | 445.17 | 446.59 | 448.01 | 449.44 | 450.86 | 452.29 | 453.71 | 455.13 | 456.56 | 457.98 |
|-----------------------------|--------|--------|--------|--------|--------|--------|--------|--------|--------|--------|--------|
| -3.78                       | 0.01   | 0.12   | 0.08   | 0.11   | 0.04   | 0.15   | 0.07   | 0.06   | 0.07   | 0.09   | 0.00   |
| -3.28                       | 0.04   | -0.02  | 0.06   | 0.14   | 0.15   | 0.02   | 0.14   | 0.07   | 0.01   | 0.03   | 0.04   |
| -2.78                       | -0.02  | -0.01  | -0.04  | -0.13  | -0.09  | -0.06  | 0.02   | -0.01  | 0.00   | -0.07  | -0.12  |

|       |        |        |        |        |        |        |        |        |        |        |        |
|-------|--------|--------|--------|--------|--------|--------|--------|--------|--------|--------|--------|
| -2.28 | 0.01   | 0.02   | 0.00   | 0.00   | 0.03   | -0.08  | -0.02  | -0.04  | -0.05  | -0.07  | 0.02   |
| -1.78 | 0.10   | -0.04  | 0.04   | 0.10   | 0.06   | 0.09   | 0.02   | 0.01   | 0.05   | 0.01   | 0.16   |
| -1.28 | -0.12  | -0.09  | -0.07  | -0.14  | -0.13  | -0.02  | -0.12  | 0.03   | -0.08  | -0.05  | -0.03  |
| -0.78 | -0.06  | -0.12  | -0.08  | -0.06  | -0.14  | -0.12  | -0.13  | -0.03  | -0.02  | 0.02   | -0.10  |
| -0.28 | 0.05   | 0.13   | 0.00   | -0.02  | 0.08   | 0.01   | 0.01   | -0.08  | 0.02   | 0.04   | 0.03   |
| -0.18 | 0.04   | 0.02   | 0.03   | 0.02   | 0.03   | 0.05   | 0.01   | -0.05  | -0.08  | -0.01  | 0.00   |
| -0.08 | 0.00   | -0.06  | 0.03   | 0.13   | 0.05   | 0.03   | 0.01   | 0.02   | -0.05  | 0.11   | 0.12   |
| 0.02  | -0.08  | 0.01   | -0.06  | 0.08   | -0.06  | -0.02  | -0.08  | -0.03  | -0.02  | 0.12   | 0.01   |
| 0.12  | 0.13   | 0.02   | 0.05   | 0.09   | 0.07   | 0.12   | 0.04   | 0.01   | 0.00   | 0.08   | 0.00   |
| 0.22  | 0.00   | -0.19  | -0.09  | -0.12  | -0.14  | -0.13  | -0.19  | -0.06  | -0.06  | -0.12  | -0.23  |
| 0.27  | 0.13   | -0.04  | -0.06  | 0.02   | 0.04   | 0.08   | 0.01   | 0.01   | 0.01   | 0.04   | 0.02   |
| 0.32  | 0.12   | 0.19   | 0.15   | 0.02   | 0.05   | 0.04   | 0.10   | 0.09   | 0.12   | 0.07   | 0.11   |
| 0.37  | 0.04   | -0.04  | -0.07  | 0.02   | 0.04   | -0.06  | -0.13  | -0.04  | 0.01   | -0.03  | -0.01  |
| 0.42  | 0.03   | 0.03   | 0.04   | -0.01  | 0.05   | 0.03   | 0.04   | 0.06   | 0.08   | 0.06   | -0.01  |
| 0.47  | -0.04  | -0.01  | -0.18  | 0.01   | -0.01  | -0.06  | -0.08  | -0.01  | -0.06  | -0.09  | -0.09  |
| 0.52  | 0.00   | -0.01  | 0.03   | -0.09  | -0.10  | -0.05  | -0.06  | -0.04  | -0.03  | 0.01   | -0.12  |
| 0.57  | 0.16   | 0.00   | 0.07   | 0.14   | 0.19   | 0.19   | 0.02   | 0.10   | 0.13   | 0.07   | 0.01   |
| 0.62  | 0.06   | 0.08   | 0.04   | -0.05  | -0.14  | 0.03   | 0.00   | 0.09   | 0.02   | 0.04   | -0.10  |
| 0.67  | -0.08  | -0.02  | -0.12  | -0.01  | 0.06   | 0.00   | -0.06  | 0.02   | -0.06  | 0.04   | -0.03  |
| 0.72  | 0.11   | 0.09   | 0.01   | -0.03  | 0.00   | -0.02  | 0.00   | 0.01   | 0.08   | 0.12   | -0.01  |
| 0.77  | -0.08  | -0.05  | -0.09  | -0.05  | -0.05  | -0.05  | -0.11  | 0.02   | -0.06  | -0.07  | -0.11  |
| 0.82  | 0.10   | 0.00   | 0.02   | -0.08  | -0.06  | 0.00   | -0.06  | 0.06   | -0.03  | -0.01  | -0.07  |
| 0.87  | 0.03   | -0.07  | -0.03  | 0.08   | 0.09   | 0.06   | 0.04   | -0.02  | -0.07  | 0.05   | 0.06   |
| 0.92  | -0.05  | -0.27  | -0.01  | -0.07  | -0.20  | 0.05   | -0.08  | 0.04   | 0.01   | -0.08  | -0.02  |
| 0.97  | -0.12  | 0.02   | 0.04   | 0.06   | 0.11   | 0.20   | 0.03   | 0.09   | 0.17   | 0.19   | -0.02  |
| 1.02  | -19.30 | -11.83 | -6.08  | -2.49  | -0.92  | -0.47  | -0.23  | 0.16   | 0.30   | -0.02  | -0.36  |
| 1.07  | 43.89  | 16.91  | -5.66  | -23.07 | -34.97 | -41.66 | -44.13 | -43.23 | -39.67 | -33.49 | -25.01 |
| 1.12  | 57.61  | 91.30  | 121.08 | 145.37 | 161.31 | 167.82 | 164.66 | 152.65 | 132.71 | 108.08 | 81.33  |
| 1.17  | 4.64   | -8.74  | -26.97 | -45.72 | -59.84 | -66.34 | -63.87 | -52.82 | -35.77 | -14.64 | 8.30   |
| 1.22  | 4.72   | 6.42   | 8.78   | 10.63  | 10.75  | 8.58   | 5.21   | 3.15   | 3.13   | 4.70   | 5.44   |
| 1.27  | 6.41   | 5.29   | 4.42   | 4.12   | 4.11   | 4.01   | 3.18   | 1.82   | -0.01  | -1.68  | -2.63  |
| 1.32  | 6.57   | 6.03   | 4.74   | 2.84   | 1.20   | 0.05   | 0.03   | 0.77   | 1.61   | 1.99   | 1.52   |
| 1.37  | 3.74   | 3.08   | 3.09   | 3.38   | 3.72   | 3.35   | 2.38   | 1.14   | 0.07   | -0.56  | -0.69  |
| 1.42  | 4.78   | 3.75   | 2.64   | 2.08   | 1.94   | 2.25   | 2.39   | 2.33   | 1.38   | 0.13   | -1.30  |
| 1.47  | 4.28   | 4.59   | 4.45   | 3.77   | 2.50   | 1.09   | 0.01   | -0.40  | -0.11  | 0.24   | 0.15   |
| 1.52  | 3.45   | 2.87   | 2.75   | 2.82   | 2.97   | 2.55   | 1.52   | 0.04   | -1.20  | -1.89  | -2.09  |
| 1.57  | 4.77   | 3.66   | 2.26   | 1.22   | 0.72   | 0.79   | 1.24   | 1.52   | 1.33   | 0.27   | -1.06  |
| 1.62  | 3.21   | 3.55   | 3.73   | 3.25   | 2.19   | 0.99   | -0.13  | -0.56  | -0.43  | -0.10  | -0.07  |
| 1.67  | 3.10   | 2.50   | 2.12   | 2.23   | 2.38   | 2.14   | 1.37   | 0.29   | -0.92  | -1.96  | -2.49  |
| 1.72  | 4.30   | 4.01   | 3.12   | 2.13   | 0.92   | 0.31   | -0.04  | 0.18   | 0.30   | 0.11   | -0.68  |
| 1.77  | 2.59   | 2.27   | 2.38   | 2.45   | 2.08   | 1.50   | 0.36   | -0.58  | -1.31  | -1.53  | -1.28  |
| 1.82  | 3.32   | 2.42   | 1.51   | 1.13   | 1.09   | 1.25   | 1.24   | 0.90   | 0.01   | -1.16  | -2.21  |
| 1.87  | 3.73   | 3.57   | 3.03   | 2.05   | 1.05   | 0.29   | -0.26  | -0.27  | -0.26  | -0.37  | -0.88  |
| 1.92  | 2.88   | 2.19   | 2.03   | 2.07   | 2.15   | 1.83   | 0.95   | -0.09  | -1.10  | -1.70  | -2.05  |
| 1.97  | 3.70   | 2.86   | 1.91   | 1.14   | 0.64   | 0.55   | 0.63   | 0.69   | 0.32   | -0.35  | -1.35  |
| 2.02  | 2.67   | 2.57   | 2.49   | 2.30   | 1.77   | 1.08   | 0.10   | -0.50  | -0.84  | -1.14  | -1.24  |
| 2.07  | 2.69   | 2.12   | 1.81   | 1.83   | 1.70   | 1.47   | 0.83   | -0.18  | -1.18  | -1.87  | -2.17  |
| 2.12  | 3.25   | 2.94   | 2.20   | 1.33   | 0.60   | 0.12   | -0.11  | -0.16  | -0.28  | -0.49  | -1.19  |
| 2.17  | 2.36   | 2.19   | 2.26   | 1.96   | 1.38   | 0.69   | -0.14  | -0.77  | -1.21  | -1.35  | -1.50  |
| 2.22  | 3.09   | 2.41   | 1.76   | 1.28   | 1.16   | 1.14   | 0.87   | 0.47   | -0.25  | -1.17  | -2.16  |

|      |      |      |      |      |      |      |       |       |       |       |       |
|------|------|------|------|------|------|------|-------|-------|-------|-------|-------|
| 2.27 | 3.14 | 3.01 | 2.47 | 1.82 | 1.00 | 0.10 | -0.31 | -0.42 | -0.59 | -0.71 | -1.22 |
| 2.32 | 2.40 | 2.06 | 1.89 | 1.72 | 1.64 | 1.12 | 0.54  | -0.28 | -1.09 | -1.54 | -1.82 |
| 2.37 | 3.13 | 2.53 | 1.75 | 1.13 | 0.77 | 0.51 | 0.29  | 0.24  | -0.11 | -0.95 | -1.73 |
| 2.42 | 2.77 | 2.57 | 2.23 | 1.75 | 1.02 | 0.26 | -0.19 | -0.64 | -0.80 | -1.00 | -1.28 |
| 2.47 | 2.66 | 2.06 | 1.77 | 1.71 | 1.33 | 0.96 | 0.41  | -0.26 | -0.91 | -1.58 | -2.03 |
| 2.52 | 3.02 | 2.60 | 2.03 | 1.23 | 0.70 | 0.38 | 0.04  | -0.10 | -0.29 | -0.74 | -1.45 |
| 2.57 | 2.50 | 2.41 | 2.21 | 1.85 | 1.36 | 0.71 | -0.13 | -0.53 | -1.02 | -1.23 | -1.48 |
| 2.62 | 2.64 | 2.15 | 1.51 | 1.19 | 1.14 | 0.85 | 0.58  | -0.11 | -0.83 | -1.44 | -2.16 |
| 2.67 | 2.95 | 2.47 | 1.99 | 1.39 | 0.72 | 0.30 | -0.09 | -0.26 | -0.45 | -0.84 | -1.43 |
| 2.72 | 2.41 | 2.18 | 1.89 | 1.75 | 1.35 | 0.92 | 0.16  | -0.36 | -1.00 | -1.43 | -1.57 |
| 2.77 | 2.83 | 2.33 | 1.75 | 1.30 | 0.93 | 0.67 | 0.41  | 0.06  | -0.54 | -1.14 | -1.87 |
| 2.82 | 2.68 | 2.37 | 2.08 | 1.48 | 0.92 | 0.34 | -0.30 | -0.57 | -0.90 | -1.14 | -1.53 |
| 2.87 | 2.61 | 2.09 | 1.74 | 1.43 | 1.12 | 0.68 | 0.28  | -0.25 | -0.71 | -1.31 | -1.86 |
| 2.92 | 2.86 | 2.46 | 1.90 | 1.26 | 0.69 | 0.30 | 0.08  | -0.14 | -0.43 | -0.97 | -1.67 |
| 2.97 | 2.51 | 2.32 | 2.03 | 1.76 | 1.18 | 0.71 | 0.07  | -0.56 | -0.96 | -1.18 | -1.47 |
| 3.02 | 2.69 | 2.22 | 1.69 | 1.32 | 1.02 | 0.77 | 0.39  | -0.21 | -0.81 | -1.37 | -1.97 |
| 3.07 | 2.65 | 2.37 | 1.82 | 1.38 | 0.82 | 0.33 | -0.13 | -0.34 | -0.65 | -1.05 | -1.71 |
| 3.12 | 2.30 | 2.00 | 1.79 | 1.45 | 1.13 | 0.53 | 0.03  | -0.70 | -1.12 | -1.38 | -1.78 |
| 3.17 | 2.64 | 2.11 | 1.49 | 1.05 | 0.71 | 0.48 | 0.11  | -0.25 | -0.83 | -1.33 | -1.92 |
| 3.22 | 2.65 | 2.43 | 2.05 | 1.54 | 1.03 | 0.44 | -0.05 | -0.38 | -0.74 | -1.07 | -1.48 |
| 3.42 | 2.44 | 1.94 | 1.69 | 1.37 | 0.98 | 0.59 | 0.17  | -0.28 | -0.90 | -1.51 | -2.10 |
| 3.62 | 2.69 | 2.30 | 1.81 | 1.26 | 0.80 | 0.42 | -0.08 | -0.45 | -0.80 | -1.07 | -1.59 |
| 3.82 | 2.54 | 2.10 | 1.74 | 1.42 | 1.06 | 0.54 | 0.27  | -0.19 | -0.78 | -1.26 | -1.84 |
| 4.02 | 2.75 | 2.27 | 1.78 | 1.37 | 0.89 | 0.34 | -0.06 | -0.45 | -0.79 | -1.12 | -1.81 |
| 4.22 | 2.49 | 2.12 | 1.59 | 1.25 | 0.94 | 0.59 | 0.07  | -0.42 | -0.96 | -1.41 | -1.81 |
| 4.42 | 2.55 | 2.16 | 1.74 | 1.35 | 0.83 | 0.49 | 0.07  | -0.36 | -0.75 | -1.15 | -1.68 |
| 4.62 | 2.35 | 1.99 | 1.59 | 1.19 | 0.86 | 0.39 | -0.17 | -0.55 | -0.97 | -1.52 | -1.98 |
| 4.82 | 2.44 | 2.06 | 1.64 | 1.29 | 0.80 | 0.45 | -0.15 | -0.41 | -0.84 | -1.31 | -1.79 |
| 5.02 | 2.42 | 1.92 | 1.61 | 1.20 | 0.80 | 0.33 | -0.15 | -0.53 | -1.03 | -1.51 | -1.91 |
| 5.22 | 2.55 | 2.05 | 1.71 | 1.25 | 0.72 | 0.46 | -0.02 | -0.32 | -0.74 | -1.19 | -1.73 |
| 5.42 | 2.36 | 1.98 | 1.57 | 1.17 | 0.76 | 0.29 | -0.14 | -0.51 | -1.07 | -1.43 | -1.82 |
| 5.62 | 2.37 | 2.03 | 1.54 | 1.25 | 0.72 | 0.32 | -0.10 | -0.63 | -0.93 | -1.39 | -1.89 |
| 5.82 | 2.17 | 1.84 | 1.44 | 1.10 | 0.61 | 0.26 | -0.29 | -0.59 | -1.07 | -1.53 | -2.04 |
| 6.02 | 2.31 | 1.94 | 1.44 | 1.11 | 0.69 | 0.39 | -0.05 | -0.53 | -0.89 | -1.27 | -1.80 |
| 6.22 | 2.24 | 1.84 | 1.43 | 1.13 | 0.70 | 0.31 | -0.23 | -0.54 | -1.01 | -1.41 | -1.96 |
| 6.42 | 2.15 | 1.75 | 1.46 | 1.03 | 0.64 | 0.25 | -0.18 | -0.59 | -1.04 | -1.52 | -1.98 |
| 6.62 | 2.34 | 2.04 | 1.58 | 1.29 | 0.76 | 0.45 | -0.10 | -0.51 | -0.95 | -1.37 | -1.75 |
| 6.82 | 2.18 | 1.80 | 1.50 | 1.15 | 0.60 | 0.26 | -0.20 | -0.67 | -1.03 | -1.49 | -1.93 |
| 7.02 | 2.24 | 1.86 | 1.51 | 1.10 | 0.70 | 0.39 | -0.09 | -0.51 | -0.98 | -1.48 | -1.77 |
| 7.22 | 2.26 | 1.93 | 1.62 | 1.18 | 0.74 | 0.41 | -0.07 | -0.45 | -1.04 | -1.28 | -1.80 |
| 7.42 | 2.32 | 1.96 | 1.56 | 1.19 | 0.66 | 0.28 | -0.17 | -0.54 | -1.05 | -1.30 | -1.90 |
| 7.62 | 2.44 | 2.00 | 1.50 | 1.22 | 0.70 | 0.35 | -0.11 | -0.48 | -0.90 | -1.33 | -1.91 |
| 7.82 | 2.17 | 1.84 | 1.53 | 1.01 | 0.68 | 0.23 | -0.24 | -0.63 | -0.90 | -1.48 | -1.77 |
| 8.02 | 2.14 | 1.79 | 1.40 | 1.06 | 0.62 | 0.27 | -0.25 | -0.61 | -1.00 | -1.47 | -1.87 |
| 8.22 | 2.27 | 1.80 | 1.49 | 1.01 | 0.63 | 0.23 | -0.15 | -0.47 | -1.04 | -1.44 | -1.88 |
| 8.42 | 2.07 | 1.76 | 1.33 | 0.98 | 0.52 | 0.16 | -0.26 | -0.61 | -1.12 | -1.49 | -2.02 |
| 8.62 | 2.28 | 2.01 | 1.55 | 1.11 | 0.77 | 0.27 | -0.17 | -0.56 | -0.95 | -1.29 | -1.81 |
| 8.82 | 2.36 | 1.97 | 1.47 | 1.10 | 0.64 | 0.36 | -0.10 | -0.53 | -0.84 | -1.29 | -1.84 |
| 9.02 | 2.32 | 1.84 | 1.44 | 1.00 | 0.69 | 0.32 | -0.07 | -0.55 | -1.06 | -1.27 | -1.94 |
| 9.22 | 2.21 | 1.71 | 1.38 | 0.93 | 0.57 | 0.20 | -0.16 | -0.65 | -1.06 | -1.45 | -1.93 |

|       |      |      |      |      |      |       |       |       |       |       |       |
|-------|------|------|------|------|------|-------|-------|-------|-------|-------|-------|
| 9.42  | 2.21 | 1.86 | 1.33 | 0.96 | 0.60 | 0.33  | -0.19 | -0.67 | -1.15 | -1.48 | -1.86 |
| 9.62  | 2.21 | 1.86 | 1.46 | 1.05 | 0.75 | 0.25  | -0.20 | -0.61 | -0.99 | -1.35 | -1.82 |
| 9.82  | 2.23 | 1.97 | 1.44 | 1.09 | 0.75 | 0.35  | -0.12 | -0.56 | -0.88 | -1.28 | -1.73 |
| 10.02 | 2.10 | 1.72 | 1.32 | 0.88 | 0.50 | 0.19  | -0.21 | -0.65 | -1.01 | -1.43 | -1.90 |
| 10.22 | 2.22 | 1.76 | 1.41 | 1.12 | 0.64 | 0.19  | -0.19 | -0.60 | -1.08 | -1.51 | -1.83 |
| 10.42 | 2.29 | 1.77 | 1.38 | 1.09 | 0.64 | 0.21  | -0.17 | -0.60 | -0.91 | -1.34 | -1.81 |
| 10.62 | 2.18 | 1.76 | 1.47 | 1.13 | 0.67 | 0.36  | -0.11 | -0.54 | -0.90 | -1.31 | -1.87 |
| 10.82 | 2.24 | 1.94 | 1.41 | 1.20 | 0.82 | 0.35  | -0.06 | -0.50 | -0.87 | -1.37 | -1.84 |
| 11.02 | 2.08 | 1.78 | 1.37 | 1.11 | 0.69 | 0.26  | -0.12 | -0.54 | -0.90 | -1.32 | -1.83 |
| 11.22 | 2.01 | 1.66 | 1.25 | 0.82 | 0.57 | 0.09  | -0.18 | -0.70 | -1.09 | -1.42 | -2.05 |
| 11.42 | 1.97 | 1.60 | 1.33 | 0.89 | 0.61 | 0.18  | -0.30 | -0.58 | -0.99 | -1.39 | -1.86 |
| 11.62 | 2.18 | 1.71 | 1.36 | 0.96 | 0.55 | 0.10  | -0.20 | -0.57 | -0.99 | -1.42 | -1.88 |
| 11.82 | 1.95 | 1.63 | 1.31 | 0.99 | 0.44 | 0.25  | -0.38 | -0.66 | -1.03 | -1.47 | -1.89 |
| 12.02 | 2.18 | 1.84 | 1.43 | 1.13 | 0.74 | 0.26  | -0.22 | -0.53 | -0.98 | -1.38 | -1.81 |
| 12.22 | 2.18 | 1.84 | 1.36 | 1.01 | 0.84 | 0.21  | -0.21 | -0.51 | -0.81 | -1.34 | -1.80 |
| 12.42 | 2.07 | 1.70 | 1.25 | 0.96 | 0.59 | 0.23  | -0.14 | -0.67 | -1.03 | -1.44 | -1.87 |
| 12.62 | 2.06 | 1.77 | 1.35 | 1.02 | 0.59 | 0.21  | -0.32 | -0.58 | -0.97 | -1.38 | -1.83 |
| 12.82 | 2.00 | 1.61 | 1.30 | 0.85 | 0.50 | 0.25  | -0.22 | -0.77 | -1.11 | -1.45 | -1.82 |
| 13.02 | 2.21 | 1.86 | 1.35 | 1.07 | 0.68 | 0.36  | -0.06 | -0.49 | -0.86 | -1.29 | -1.75 |
| 13.22 | 2.09 | 1.73 | 1.21 | 0.89 | 0.68 | 0.18  | -0.28 | -0.58 | -1.09 | -1.42 | -1.91 |
| 13.42 | 1.93 | 1.66 | 1.34 | 0.96 | 0.47 | 0.14  | -0.25 | -0.59 | -0.98 | -1.31 | -1.93 |
| 13.50 | 1.94 | 1.61 | 1.15 | 0.88 | 0.44 | 0.10  | -0.36 | -0.69 | -1.12 | -1.47 | -1.94 |
| 13.59 | 2.15 | 1.82 | 1.44 | 1.04 | 0.66 | 0.36  | -0.19 | -0.48 | -0.94 | -1.37 | -1.71 |
| 13.68 | 2.04 | 1.56 | 1.21 | 0.84 | 0.37 | 0.08  | -0.26 | -0.73 | -1.05 | -1.52 | -1.89 |
| 13.78 | 1.95 | 1.65 | 1.25 | 0.93 | 0.59 | 0.18  | -0.31 | -0.76 | -1.14 | -1.43 | -1.92 |
| 13.88 | 2.02 | 1.68 | 1.35 | 0.90 | 0.59 | 0.16  | -0.23 | -0.64 | -1.08 | -1.45 | -1.87 |
| 14.00 | 2.17 | 1.82 | 1.34 | 0.91 | 0.70 | 0.24  | -0.21 | -0.53 | -0.98 | -1.38 | -1.87 |
| 14.12 | 1.91 | 1.52 | 1.17 | 0.84 | 0.51 | 0.10  | -0.32 | -0.69 | -1.11 | -1.56 | -1.99 |
| 14.25 | 2.06 | 1.57 | 1.24 | 0.86 | 0.55 | 0.11  | -0.30 | -0.71 | -1.02 | -1.52 | -1.95 |
| 14.40 | 2.07 | 1.67 | 1.29 | 0.92 | 0.60 | 0.18  | -0.29 | -0.57 | -1.08 | -1.48 | -1.87 |
| 14.55 | 2.02 | 1.60 | 1.27 | 0.82 | 0.48 | 0.19  | -0.31 | -0.69 | -1.06 | -1.48 | -1.92 |
| 14.72 | 1.99 | 1.55 | 1.18 | 1.01 | 0.57 | 0.12  | -0.18 | -0.62 | -1.04 | -1.34 | -1.82 |
| 14.90 | 2.01 | 1.66 | 1.32 | 0.99 | 0.59 | 0.26  | -0.25 | -0.61 | -0.91 | -1.29 | -1.79 |
| 15.09 | 1.94 | 1.58 | 1.26 | 0.92 | 0.45 | 0.21  | -0.29 | -0.67 | -1.07 | -1.45 | -1.90 |
| 15.30 | 2.01 | 1.56 | 1.27 | 0.88 | 0.49 | 0.19  | -0.25 | -0.64 | -1.11 | -1.52 | -1.96 |
| 15.53 | 2.05 | 1.63 | 1.23 | 0.89 | 0.55 | 0.17  | -0.27 | -0.71 | -1.10 | -1.46 | -1.99 |
| 15.77 | 1.97 | 1.56 | 1.11 | 0.89 | 0.53 | 0.14  | -0.32 | -0.72 | -1.15 | -1.53 | -1.90 |
| 16.04 | 2.20 | 1.72 | 1.46 | 1.01 | 0.64 | 0.18  | -0.20 | -0.50 | -0.94 | -1.42 | -1.76 |
| 16.32 | 1.93 | 1.63 | 1.26 | 1.00 | 0.46 | 0.12  | -0.31 | -0.61 | -1.01 | -1.51 | -1.85 |
| 16.63 | 2.02 | 1.71 | 1.31 | 0.95 | 0.60 | 0.14  | -0.19 | -0.65 | -0.98 | -1.45 | -1.86 |
| 16.96 | 1.89 | 1.56 | 1.14 | 0.87 | 0.41 | 0.01  | -0.37 | -0.78 | -1.17 | -1.56 | -2.06 |
| 17.31 | 2.07 | 1.63 | 1.27 | 0.91 | 0.47 | 0.10  | -0.19 | -0.65 | -1.10 | -1.43 | -1.82 |
| 17.70 | 2.12 | 1.67 | 1.37 | 1.04 | 0.48 | 0.21  | -0.29 | -0.60 | -1.05 | -1.57 | -1.93 |
| 18.11 | 1.84 | 1.62 | 1.11 | 0.82 | 0.42 | 0.01  | -0.38 | -0.75 | -1.21 | -1.50 | -2.14 |
| 18.56 | 2.02 | 1.64 | 1.28 | 0.97 | 0.55 | 0.12  | -0.20 | -0.62 | -1.02 | -1.42 | -1.87 |
| 19.04 | 1.98 | 1.54 | 1.27 | 0.86 | 0.47 | 0.03  | -0.41 | -0.75 | -1.14 | -1.40 | -1.95 |
| 19.56 | 2.04 | 1.70 | 1.33 | 1.02 | 0.55 | 0.16  | -0.21 | -0.56 | -1.01 | -1.45 | -1.73 |
| 20.12 | 1.93 | 1.53 | 1.14 | 0.82 | 0.49 | -0.01 | -0.29 | -0.59 | -1.10 | -1.51 | -2.01 |
| 20.72 | 2.05 | 1.70 | 1.32 | 1.01 | 0.62 | 0.23  | -0.21 | -0.55 | -1.08 | -1.45 | -1.85 |
| 21.37 | 1.97 | 1.57 | 1.25 | 0.93 | 0.49 | 0.08  | -0.42 | -0.82 | -1.11 | -1.50 | -2.00 |

|        |      |      |      |      |       |       |       |       |       |       |       |
|--------|------|------|------|------|-------|-------|-------|-------|-------|-------|-------|
| 22.08  | 1.94 | 1.60 | 1.25 | 1.07 | 0.61  | 0.25  | -0.10 | -0.44 | -0.95 | -1.34 | -1.75 |
| 22.84  | 2.04 | 1.53 | 1.26 | 0.91 | 0.48  | 0.16  | -0.33 | -0.68 | -1.13 | -1.56 | -2.00 |
| 23.65  | 1.94 | 1.50 | 1.18 | 0.83 | 0.38  | 0.01  | -0.30 | -0.78 | -1.13 | -1.58 | -1.95 |
| 24.54  | 1.84 | 1.54 | 1.20 | 0.81 | 0.50  | 0.08  | -0.35 | -0.74 | -1.15 | -1.61 | -2.01 |
| 25.49  | 1.87 | 1.58 | 1.21 | 0.73 | 0.45  | 0.06  | -0.30 | -0.78 | -1.12 | -1.65 | -2.00 |
| 26.51  | 1.71 | 1.42 | 0.84 | 0.71 | 0.34  | -0.09 | -0.48 | -0.90 | -1.30 | -1.65 | -2.24 |
| 27.62  | 1.98 | 1.32 | 1.05 | 0.80 | 0.28  | -0.05 | -0.43 | -0.89 | -1.29 | -1.65 | -2.17 |
| 28.81  | 1.87 | 1.55 | 1.25 | 0.80 | 0.40  | 0.07  | -0.33 | -0.71 | -1.16 | -1.53 | -2.04 |
| 30.10  | 1.68 | 1.39 | 1.02 | 0.66 | 0.25  | -0.04 | -0.40 | -0.86 | -1.33 | -1.64 | -2.11 |
| 31.49  | 1.94 | 1.63 | 1.27 | 0.83 | 0.47  | 0.09  | -0.31 | -0.67 | -1.07 | -1.53 | -2.06 |
| 32.98  | 1.95 | 1.56 | 1.21 | 0.83 | 0.44  | 0.12  | -0.34 | -0.67 | -1.16 | -1.59 | -2.04 |
| 34.60  | 1.81 | 1.44 | 1.06 | 0.79 | 0.35  | -0.05 | -0.45 | -0.89 | -1.20 | -1.65 | -2.06 |
| 36.34  | 1.77 | 1.37 | 0.87 | 0.57 | 0.21  | -0.03 | -0.42 | -0.91 | -1.23 | -1.71 | -2.18 |
| 38.21  | 1.92 | 1.54 | 1.31 | 0.85 | 0.41  | 0.05  | -0.32 | -0.70 | -1.10 | -1.61 | -2.01 |
| 40.24  | 1.71 | 1.46 | 1.05 | 0.65 | 0.27  | -0.06 | -0.58 | -0.77 | -1.16 | -1.59 | -2.14 |
| 42.42  | 1.67 | 1.28 | 1.03 | 0.68 | 0.33  | -0.06 | -0.59 | -0.93 | -1.39 | -1.78 | -2.26 |
| 44.78  | 1.67 | 1.32 | 0.95 | 0.65 | 0.36  | -0.01 | -0.48 | -0.93 | -1.26 | -1.73 | -2.21 |
| 47.32  | 1.55 | 1.41 | 1.06 | 0.63 | 0.23  | 0.00  | -0.49 | -0.97 | -1.28 | -1.65 | -2.09 |
| 50.06  | 1.78 | 1.39 | 1.06 | 0.69 | 0.28  | -0.10 | -0.43 | -0.84 | -1.17 | -1.62 | -2.09 |
| 53.01  | 1.60 | 1.19 | 0.97 | 0.56 | 0.20  | -0.18 | -0.57 | -1.10 | -1.36 | -1.92 | -2.17 |
| 56.20  | 1.72 | 1.37 | 0.89 | 0.60 | 0.19  | -0.13 | -0.57 | -0.91 | -1.35 | -1.66 | -2.13 |
| 59.64  | 1.63 | 1.33 | 0.93 | 0.52 | 0.22  | -0.10 | -0.48 | -0.94 | -1.28 | -1.69 | -2.29 |
| 63.34  | 1.65 | 1.20 | 0.93 | 0.57 | 0.21  | -0.14 | -0.52 | -0.90 | -1.34 | -1.63 | -2.16 |
| 67.34  | 1.58 | 1.22 | 1.00 | 0.56 | 0.27  | -0.10 | -0.50 | -0.98 | -1.45 | -1.83 | -2.15 |
| 71.65  | 1.60 | 1.17 | 0.90 | 0.57 | 0.23  | -0.29 | -0.57 | -1.03 | -1.46 | -1.87 | -2.30 |
| 76.30  | 1.64 | 1.23 | 0.95 | 0.60 | 0.05  | -0.14 | -0.60 | -0.92 | -1.33 | -1.74 | -2.03 |
| 81.32  | 1.68 | 1.27 | 0.98 | 0.63 | 0.27  | -0.10 | -0.54 | -0.93 | -1.40 | -1.64 | -2.15 |
| 86.73  | 1.58 | 1.28 | 0.87 | 0.55 | 0.28  | -0.16 | -0.57 | -1.04 | -1.37 | -1.66 | -2.10 |
| 92.56  | 1.65 | 1.33 | 0.96 | 0.58 | 0.27  | -0.12 | -0.51 | -0.91 | -1.28 | -1.64 | -2.22 |
| 98.85  | 1.61 | 1.30 | 0.85 | 0.54 | 0.02  | -0.25 | -0.55 | -1.02 | -1.46 | -1.71 | -2.19 |
| 105.64 | 1.78 | 1.31 | 0.92 | 0.67 | 0.24  | -0.20 | -0.55 | -0.93 | -1.37 | -1.74 | -2.22 |
| 112.96 | 1.61 | 1.24 | 0.81 | 0.58 | 0.26  | -0.16 | -0.62 | -0.92 | -1.28 | -1.77 | -2.21 |
| 120.85 | 1.48 | 1.26 | 0.85 | 0.52 | 0.14  | -0.28 | -0.69 | -0.96 | -1.35 | -1.75 | -2.26 |
| 129.36 | 1.69 | 1.32 | 1.02 | 0.60 | 0.26  | -0.09 | -0.53 | -0.99 | -1.52 | -1.70 | -2.22 |
| 138.55 | 1.70 | 1.39 | 0.97 | 0.67 | 0.34  | 0.07  | -0.41 | -0.81 | -1.30 | -1.72 | -2.12 |
| 148.45 | 1.61 | 1.14 | 0.84 | 0.52 | 0.15  | -0.18 | -0.64 | -1.02 | -1.44 | -1.79 | -2.17 |
| 159.13 | 1.54 | 1.20 | 0.82 | 0.58 | 0.21  | -0.25 | -0.59 | -0.97 | -1.28 | -1.78 | -2.25 |
| 170.65 | 1.46 | 1.02 | 0.71 | 0.40 | -0.02 | -0.38 | -0.71 | -1.12 | -1.54 | -1.83 | -2.33 |
| 183.07 | 1.58 | 1.30 | 0.91 | 0.52 | 0.32  | -0.15 | -0.67 | -0.99 | -1.35 | -1.81 | -2.32 |
| 196.47 | 1.44 | 1.18 | 0.75 | 0.39 | 0.16  | -0.29 | -0.59 | -1.09 | -1.46 | -1.81 | -2.27 |
| 210.91 | 1.43 | 1.12 | 0.85 | 0.43 | 0.08  | -0.19 | -0.61 | -0.96 | -1.42 | -1.78 | -2.26 |
| 226.50 | 1.55 | 1.21 | 0.95 | 0.59 | 0.19  | -0.11 | -0.51 | -0.90 | -1.34 | -1.79 | -2.26 |
| 243.31 | 1.55 | 1.19 | 0.87 | 0.57 | 0.24  | -0.27 | -0.44 | -0.96 | -1.30 | -1.76 | -2.15 |
| 261.43 | 1.52 | 1.28 | 0.80 | 0.55 | 0.23  | -0.18 | -0.64 | -0.94 | -1.42 | -1.80 | -2.30 |
| 280.98 | 1.55 | 1.29 | 0.83 | 0.55 | 0.26  | -0.06 | -0.58 | -0.92 | -1.34 | -1.84 | -2.17 |
| 302.07 | 1.64 | 1.26 | 1.00 | 0.59 | 0.16  | -0.04 | -0.58 | -0.91 | -1.36 | -1.71 | -2.02 |
| 324.81 | 1.46 | 1.07 | 0.81 | 0.42 | 0.06  | -0.15 | -0.66 | -0.93 | -1.51 | -1.97 | -2.33 |
| 349.33 | 1.55 | 1.26 | 0.96 | 0.56 | 0.34  | -0.17 | -0.49 | -0.83 | -1.26 | -1.63 | -2.13 |
| 375.79 | 1.62 | 1.30 | 0.80 | 0.55 | 0.16  | -0.10 | -0.68 | -0.90 | -1.36 | -1.73 | -2.20 |
| 404.31 | 1.58 | 1.27 | 0.81 | 0.51 | 0.16  | -0.16 | -0.51 | -1.06 | -1.37 | -1.79 | -2.14 |

|         |      |      |      |      |       |       |       |       |       |       |       |
|---------|------|------|------|------|-------|-------|-------|-------|-------|-------|-------|
| 435.08  | 1.50 | 1.12 | 0.83 | 0.42 | 0.18  | -0.23 | -0.65 | -0.92 | -1.30 | -1.76 | -2.22 |
| 468.27  | 1.53 | 1.25 | 0.80 | 0.53 | 0.16  | -0.16 | -0.68 | -0.87 | -1.41 | -1.79 | -2.15 |
| 504.06  | 1.52 | 1.16 | 0.89 | 0.42 | 0.10  | -0.26 | -0.55 | -1.03 | -1.28 | -1.71 | -2.17 |
| 542.66  | 1.44 | 1.23 | 0.83 | 0.52 | 0.07  | -0.26 | -0.67 | -1.04 | -1.37 | -1.79 | -2.23 |
| 584.29  | 1.61 | 1.23 | 0.78 | 0.50 | 0.20  | -0.16 | -0.55 | -0.94 | -1.33 | -1.74 | -2.11 |
| 629.18  | 1.49 | 1.30 | 0.91 | 0.62 | 0.17  | -0.19 | -0.54 | -0.97 | -1.28 | -1.68 | -2.13 |
| 677.61  | 1.44 | 1.15 | 0.83 | 0.50 | 0.18  | -0.24 | -0.61 | -0.88 | -1.40 | -1.71 | -2.22 |
| 729.83  | 1.53 | 1.24 | 0.86 | 0.59 | 0.18  | -0.14 | -0.67 | -0.99 | -1.39 | -1.60 | -2.09 |
| 786.16  | 1.62 | 1.32 | 1.04 | 0.71 | 0.22  | -0.02 | -0.50 | -0.79 | -1.21 | -1.58 | -2.03 |
| 846.90  | 1.44 | 1.08 | 0.76 | 0.44 | 0.21  | -0.31 | -0.65 | -1.07 | -1.50 | -1.78 | -2.27 |
| 912.42  | 1.40 | 1.12 | 0.63 | 0.46 | 0.22  | -0.25 | -0.62 | -1.02 | -1.53 | -1.78 | -2.19 |
| 983.08  | 1.50 | 1.18 | 0.72 | 0.50 | 0.08  | -0.15 | -0.59 | -1.01 | -1.36 | -1.71 | -2.09 |
| 1059.29 | 1.50 | 1.08 | 0.92 | 0.52 | 0.17  | -0.27 | -0.60 | -0.95 | -1.43 | -1.80 | -2.14 |
| 1141.48 | 1.27 | 1.01 | 0.67 | 0.41 | -0.08 | -0.23 | -0.66 | -1.14 | -1.55 | -1.96 | -2.38 |
| 1230.13 | 1.49 | 1.13 | 0.75 | 0.49 | 0.20  | -0.12 | -0.56 | -1.04 | -1.42 | -1.77 | -2.15 |
| 1325.73 | 1.43 | 1.09 | 0.86 | 0.43 | 0.10  | -0.19 | -0.74 | -0.99 | -1.40 | -1.84 | -2.27 |
| 1428.84 | 1.30 | 0.91 | 0.58 | 0.29 | 0.02  | -0.32 | -0.79 | -1.09 | -1.38 | -1.93 | -2.23 |
| 1540.05 | 1.37 | 0.98 | 0.60 | 0.29 | -0.13 | -0.42 | -0.83 | -1.17 | -1.38 | -1.95 | -2.39 |
| 1659.99 | 1.38 | 0.97 | 0.59 | 0.32 | -0.07 | -0.36 | -0.79 | -1.15 | -1.52 | -1.94 | -2.35 |
| 1789.34 | 1.20 | 0.87 | 0.46 | 0.12 | -0.05 | -0.57 | -0.93 | -1.26 | -1.56 | -2.06 | -2.52 |
| 1928.85 | 1.20 | 0.92 | 0.57 | 0.26 | -0.13 | -0.41 | -0.80 | -1.24 | -1.66 | -1.99 | -2.47 |
| 2079.31 | 1.12 | 0.79 | 0.57 | 0.24 | -0.13 | -0.49 | -0.85 | -1.26 | -1.61 | -2.04 | -2.44 |
| 2241.59 | 1.27 | 0.81 | 0.56 | 0.19 | -0.15 | -0.52 | -0.95 | -1.23 | -1.79 | -2.12 | -2.45 |
| 2416.60 | 1.31 | 0.91 | 0.60 | 0.23 | -0.05 | -0.46 | -0.88 | -1.14 | -1.65 | -1.98 | -2.40 |
| 2605.36 | 1.22 | 0.86 | 0.59 | 0.24 | -0.06 | -0.49 | -0.91 | -1.35 | -1.62 | -2.06 | -2.45 |
| 2808.94 | 1.00 | 0.71 | 0.41 | 0.08 | -0.29 | -0.70 | -1.08 | -1.44 | -1.74 | -2.22 | -2.61 |
| 3028.50 | 1.11 | 0.75 | 0.48 | 0.19 | -0.32 | -0.55 | -0.86 | -1.34 | -1.75 | -2.10 | -2.54 |
| 3265.30 | 1.25 | 0.81 | 0.47 | 0.29 | -0.14 | -0.57 | -0.97 | -1.33 | -1.54 | -2.01 | -2.53 |
| 3520.69 | 1.21 | 1.01 | 0.62 | 0.30 | -0.08 | -0.34 | -0.79 | -1.12 | -1.46 | -2.03 | -2.36 |
| 3796.13 | 1.24 | 1.02 | 0.69 | 0.39 | -0.04 | -0.29 | -0.67 | -1.12 | -1.48 | -1.82 | -2.22 |

| Wavelength (nm) \ Time (ps) | 459.41 | 460.83 | 462.25 | 463.68 | 465.10 | 466.53 | 467.95 | 469.37 | 470.80 | 472.22 | 473.65 |
|-----------------------------|--------|--------|--------|--------|--------|--------|--------|--------|--------|--------|--------|
| -3.78                       | 0.02   | 0.03   | -0.03  | 0.07   | 0.13   | 0.14   | 0.08   | 0.04   | 0.07   | 0.07   | 0.11   |
| -3.28                       | 0.08   | 0.05   | 0.07   | 0.10   | 0.03   | 0.10   | 0.09   | 0.13   | 0.14   | 0.14   | 0.09   |
| -2.78                       | -0.02  | -0.04  | -0.03  | -0.05  | 0.01   | -0.10  | -0.10  | -0.06  | -0.01  | -0.14  | -0.03  |
| -2.28                       | 0.02   | -0.01  | 0.04   | 0.00   | -0.02  | -0.04  | 0.00   | 0.12   | -0.13  | -0.03  | -0.02  |
| -1.78                       | 0.02   | 0.07   | 0.01   | 0.01   | 0.01   | 0.01   | 0.11   | 0.01   | 0.04   | 0.11   | 0.07   |
| -1.28                       | 0.06   | -0.05  | -0.04  | -0.11  | -0.09  | -0.05  | -0.06  | -0.12  | -0.05  | -0.02  | -0.12  |
| -0.78                       | -0.14  | -0.07  | -0.02  | -0.06  | -0.13  | -0.02  | -0.13  | -0.06  | -0.04  | -0.14  | -0.11  |
| -0.28                       | -0.04  | 0.02   | 0.00   | 0.06   | 0.07   | -0.04  | 0.02   | -0.06  | -0.01  | 0.00   | 0.01   |
| -0.18                       | -0.01  | -0.06  | -0.03  | -0.11  | 0.03   | 0.07   | -0.02  | 0.07   | 0.13   | 0.10   | 0.06   |
| -0.08                       | 0.10   | -0.07  | 0.03   | -0.03  | 0.07   | 0.08   | -0.01  | 0.06   | 0.11   | 0.01   | 0.03   |
| 0.02                        | 0.04   | 0.01   | 0.09   | 0.00   | 0.02   | 0.10   | 0.03   | 0.06   | 0.00   | -0.03  | -0.01  |
| 0.12                        | 0.05   | 0.04   | 0.03   | 0.04   | 0.01   | 0.13   | 0.03   | 0.09   | 0.07   | 0.10   | 0.17   |
| 0.22                        | -0.06  | -0.12  | -0.10  | -0.08  | -0.06  | -0.13  | -0.24  | -0.05  | -0.16  | -0.07  | -0.10  |
| 0.27                        | -0.05  | -0.08  | 0.08   | -0.01  | 0.05   | -0.04  | -0.01  | 0.08   | 0.05   | 0.04   | -0.02  |
| 0.32                        | 0.13   | 0.08   | 0.16   | 0.16   | 0.10   | 0.13   | 0.11   | 0.22   | 0.09   | 0.11   | 0.06   |



|      |        |       |        |        |        |        |        |        |        |        |        |
|------|--------|-------|--------|--------|--------|--------|--------|--------|--------|--------|--------|
| 0.37 | 0.06   | 0.04  | 0.03   | 0.06   | 0.08   | -0.04  | -0.04  | 0.01   | -0.05  | -0.03  | -0.02  |
| 0.42 | 0.02   | -0.09 | -0.07  | -0.06  | 0.07   | -0.05  | 0.01   | -0.04  | -0.04  | -0.11  | -0.07  |
| 0.47 | 0.04   | -0.01 | -0.09  | -0.06  | -0.07  | -0.15  | -0.11  | -0.12  | -0.12  | -0.01  | -0.01  |
| 0.52 | -0.03  | -0.07 | -0.02  | -0.11  | 0.03   | 0.00   | -0.09  | 0.06   | -0.09  | 0.03   | -0.06  |
| 0.57 | 0.13   | 0.05  | 0.15   | 0.10   | 0.08   | 0.10   | 0.12   | 0.11   | 0.13   | 0.14   | 0.14   |
| 0.62 | 0.08   | 0.09  | -0.02  | -0.06  | -0.08  | 0.04   | -0.07  | 0.07   | 0.04   | -0.01  | 0.01   |
| 0.67 | 0.00   | -0.11 | -0.04  | 0.16   | -0.04  | -0.05  | -0.19  | -0.08  | 0.02   | -0.03  | -0.11  |
| 0.72 | 0.04   | 0.00  | 0.03   | 0.05   | -0.05  | -0.06  | -0.06  | -0.03  | -0.05  | 0.06   | -0.04  |
| 0.77 | 0.05   | -0.03 | -0.15  | -0.04  | -0.08  | -0.07  | -0.13  | -0.10  | -0.05  | -0.08  | -0.06  |
| 0.82 | 0.05   | 0.00  | -0.01  | 0.03   | 0.05   | -0.01  | -0.05  | -0.01  | 0.02   | -0.09  | -0.02  |
| 0.87 | 0.13   | -0.01 | 0.02   | -0.03  | 0.10   | -0.02  | -0.02  | -0.01  | 0.06   | 0.15   | 0.01   |
| 0.92 | -0.10  | -0.05 | 0.07   | -0.12  | -0.06  | -0.07  | -0.14  | -0.05  | 0.02   | -0.12  | -0.06  |
| 0.97 | 0.10   | 0.16  | 0.03   | 0.04   | 0.00   | 0.07   | 0.15   | 0.06   | 0.09   | 0.12   | 0.06   |
| 1.02 | -0.32  | -0.08 | 0.26   | 0.09   | -0.12  | -0.16  | -0.19  | -0.06  | 0.00   | -0.08  | -0.02  |
| 1.07 | -15.49 | -6.85 | -0.72  | 1.90   | 1.92   | 0.51   | -0.75  | -1.13  | -0.86  | -0.45  | -0.07  |
| 1.12 | 55.07  | 30.35 | 8.96   | -8.49  | -22.03 | -32.25 | -39.13 | -43.06 | -44.04 | -41.69 | -36.71 |
| 1.17 | 31.78  | 54.27 | 75.81  | 95.50  | 112.39 | 124.91 | 131.66 | 130.95 | 123.76 | 109.80 | 92.67  |
| 1.22 | 2.63   | -5.88 | -20.27 | -38.25 | -56.21 | -70.03 | -77.74 | -77.17 | -68.94 | -53.77 | -33.75 |
| 1.27 | -2.51  | -1.40 | 0.39   | 2.24   | 3.26   | 2.98   | 1.13   | -1.60  | -4.49  | -6.10  | -5.98  |
| 1.32 | 0.15   | -1.49 | -2.82  | -3.58  | -3.87  | -3.62  | -3.68  | -4.18  | -5.46  | -7.38  | -9.42  |
| 1.37 | -0.39  | -0.27 | -0.57  | -1.66  | -3.32  | -5.13  | -6.65  | -7.62  | -7.84  | -7.40  | -6.88  |
| 1.42 | -2.52  | -3.35 | -3.35  | -3.15  | -2.95  | -3.08  | -3.82  | -4.91  | -6.03  | -7.26  | -8.06  |
| 1.47 | -0.56  | -1.77 | -3.12  | -4.35  | -5.03  | -5.07  | -4.73  | -4.26  | -4.13  | -4.88  | -5.99  |
| 1.52 | -1.77  | -1.37 | -1.16  | -1.93  | -3.09  | -4.53  | -5.94  | -6.99  | -7.46  | -7.50  | -7.30  |
| 1.57 | -2.34  | -3.36 | -3.54  | -3.49  | -3.15  | -3.04  | -3.65  | -4.62  | -6.20  | -7.67  | -8.86  |
| 1.62 | -0.45  | -1.51 | -3.06  | -4.52  | -5.63  | -5.98  | -5.79  | -5.26  | -4.93  | -5.10  | -5.85  |
| 1.67 | -2.53  | -2.29 | -2.10  | -2.50  | -3.28  | -4.34  | -5.73  | -6.61  | -7.29  | -7.43  | -7.51  |
| 1.72 | -1.57  | -2.81 | -3.72  | -4.25  | -4.20  | -3.99  | -4.02  | -4.33  | -5.12  | -6.35  | -7.76  |
| 1.77 | -1.21  | -1.29 | -1.80  | -2.94  | -4.14  | -5.31  | -6.37  | -6.61  | -6.65  | -6.58  | -6.61  |
| 1.82 | -2.98  | -3.41 | -3.34  | -3.21  | -3.39  | -3.77  | -4.79  | -5.86  | -6.91  | -7.73  | -8.21  |
| 1.87 | -1.83  | -2.85 | -3.74  | -4.61  | -4.82  | -4.71  | -4.62  | -4.54  | -5.13  | -5.94  | -7.09  |
| 1.92 | -1.94  | -1.82 | -1.99  | -2.40  | -3.30  | -4.48  | -5.67  | -6.53  | -6.96  | -7.16  | -7.02  |
| 1.97 | -2.44  | -3.15 | -3.47  | -3.70  | -3.68  | -3.66  | -4.08  | -4.87  | -5.96  | -7.02  | -7.98  |
| 2.02 | -1.56  | -2.12 | -2.87  | -3.86  | -4.66  | -5.27  | -5.82  | -5.90  | -5.88  | -6.09  | -6.43  |
| 2.07 | -2.27  | -2.19 | -2.25  | -2.80  | -3.48  | -4.50  | -5.52  | -6.19  | -6.74  | -6.94  | -7.07  |
| 2.12 | -2.11  | -2.89 | -3.62  | -4.14  | -4.25  | -4.28  | -4.55  | -4.89  | -5.65  | -6.63  | -7.62  |
| 2.17 | -1.62  | -2.08 | -2.82  | -3.76  | -4.58  | -5.26  | -5.79  | -5.80  | -5.95  | -6.00  | -6.42  |
| 2.22 | -2.63  | -3.02 | -3.04  | -3.26  | -3.47  | -3.86  | -4.86  | -5.62  | -6.44  | -7.23  | -7.68  |
| 2.27 | -1.77  | -2.61 | -3.44  | -4.13  | -4.62  | -4.69  | -4.73  | -4.94  | -5.36  | -6.00  | -6.96  |
| 2.32 | -1.82  | -1.98 | -2.34  | -2.95  | -3.83  | -4.72  | -5.67  | -6.17  | -6.44  | -6.69  | -6.81  |
| 2.37 | -2.57  | -3.19 | -3.51  | -3.73  | -3.83  | -4.03  | -4.63  | -5.25  | -6.10  | -6.92  | -7.70  |
| 2.42 | -1.90  | -2.55 | -3.29  | -4.17  | -4.57  | -4.98  | -5.24  | -5.27  | -5.66  | -6.17  | -6.86  |
| 2.47 | -2.26  | -2.24 | -2.52  | -3.07  | -3.71  | -4.49  | -5.24  | -6.03  | -6.43  | -6.70  | -6.97  |
| 2.52 | -2.17  | -3.01 | -3.45  | -3.98  | -4.09  | -4.39  | -4.65  | -5.15  | -5.92  | -6.64  | -7.38  |
| 2.57 | -1.81  | -2.26 | -2.85  | -3.75  | -4.43  | -5.02  | -5.44  | -5.67  | -5.87  | -6.13  | -6.61  |
| 2.62 | -2.47  | -2.77 | -2.98  | -3.29  | -3.72  | -4.30  | -5.10  | -5.85  | -6.51  | -7.08  | -7.37  |
| 2.67 | -2.07  | -2.84 | -3.38  | -3.84  | -4.11  | -4.27  | -4.68  | -4.99  | -5.71  | -6.42  | -7.13  |
| 2.72 | -1.84  | -2.18 | -2.63  | -3.25  | -3.95  | -4.78  | -5.41  | -5.80  | -6.04  | -6.32  | -6.68  |
| 2.77 | -2.38  | -2.97 | -3.34  | -3.55  | -3.78  | -4.14  | -4.78  | -5.38  | -6.10  | -6.84  | -7.27  |
| 2.82 | -1.95  | -2.59 | -3.34  | -3.91  | -4.33  | -4.66  | -5.07  | -5.30  | -5.74  | -6.19  | -6.87  |

|       |       |       |       |       |       |       |       |       |       |       |       |
|-------|-------|-------|-------|-------|-------|-------|-------|-------|-------|-------|-------|
| 2.87  | -2.14 | -2.42 | -2.85 | -3.34 | -3.99 | -4.42 | -5.13 | -5.65 | -6.12 | -6.50 | -6.93 |
| 2.92  | -2.36 | -2.98 | -3.47 | -3.84 | -4.04 | -4.25 | -4.74 | -5.18 | -5.81 | -6.54 | -7.39 |
| 2.97  | -1.90 | -2.36 | -2.83 | -3.65 | -4.21 | -4.80 | -5.28 | -5.63 | -5.84 | -6.18 | -6.66 |
| 3.02  | -2.40 | -2.61 | -2.98 | -3.28 | -3.85 | -4.30 | -5.00 | -5.62 | -6.23 | -6.71 | -7.00 |
| 3.07  | -2.24 | -2.72 | -3.38 | -3.82 | -4.24 | -4.53 | -4.99 | -5.36 | -5.78 | -6.37 | -7.13 |
| 3.12  | -2.03 | -2.47 | -2.88 | -3.49 | -4.13 | -4.76 | -5.32 | -5.64 | -5.91 | -6.20 | -6.67 |
| 3.17  | -2.51 | -2.94 | -3.25 | -3.68 | -4.00 | -4.37 | -4.91 | -5.53 | -5.98 | -6.70 | -7.20 |
| 3.22  | -1.93 | -2.51 | -3.12 | -3.78 | -4.28 | -4.70 | -5.07 | -5.28 | -5.75 | -6.24 | -6.85 |
| 3.42  | -2.42 | -2.74 | -3.05 | -3.47 | -4.02 | -4.51 | -5.18 | -5.78 | -6.23 | -6.75 | -7.10 |
| 3.62  | -2.15 | -2.81 | -3.39 | -3.83 | -4.16 | -4.53 | -4.93 | -5.37 | -5.92 | -6.43 | -7.05 |
| 3.82  | -2.22 | -2.56 | -2.96 | -3.39 | -3.83 | -4.32 | -5.08 | -5.53 | -6.00 | -6.45 | -6.93 |
| 4.02  | -2.15 | -2.74 | -3.22 | -3.72 | -4.17 | -4.51 | -5.02 | -5.30 | -5.87 | -6.36 | -6.88 |
| 4.22  | -2.24 | -2.61 | -3.11 | -3.59 | -4.01 | -4.52 | -5.08 | -5.53 | -6.07 | -6.59 | -6.92 |
| 4.42  | -2.14 | -2.67 | -3.14 | -3.64 | -4.08 | -4.37 | -4.87 | -5.35 | -5.83 | -6.38 | -6.96 |
| 4.62  | -2.32 | -2.76 | -3.17 | -3.72 | -4.12 | -4.57 | -5.19 | -5.51 | -6.03 | -6.42 | -6.99 |
| 4.82  | -2.20 | -2.71 | -3.09 | -3.66 | -4.09 | -4.50 | -4.97 | -5.26 | -5.92 | -6.26 | -6.88 |
| 5.02  | -2.29 | -2.78 | -3.23 | -3.69 | -4.15 | -4.65 | -5.25 | -5.56 | -6.12 | -6.55 | -6.84 |
| 5.22  | -2.16 | -2.65 | -3.09 | -3.60 | -3.94 | -4.44 | -4.96 | -5.33 | -5.78 | -6.28 | -6.88 |
| 5.42  | -2.19 | -2.72 | -3.18 | -3.60 | -4.06 | -4.49 | -5.11 | -5.42 | -5.84 | -6.37 | -6.93 |
| 5.62  | -2.23 | -2.70 | -3.22 | -3.60 | -3.99 | -4.55 | -4.98 | -5.32 | -5.79 | -6.36 | -6.89 |
| 5.82  | -2.25 | -2.87 | -3.11 | -3.64 | -4.11 | -4.62 | -5.15 | -5.51 | -5.87 | -6.32 | -6.97 |
| 6.02  | -2.22 | -2.69 | -3.13 | -3.54 | -4.02 | -4.36 | -4.95 | -5.23 | -5.83 | -6.30 | -6.73 |
| 6.22  | -2.26 | -2.63 | -3.19 | -3.63 | -4.14 | -4.48 | -4.95 | -5.43 | -5.87 | -6.31 | -6.81 |
| 6.42  | -2.35 | -2.84 | -3.34 | -3.76 | -4.14 | -4.49 | -5.01 | -5.51 | -5.91 | -6.37 | -6.88 |
| 6.62  | -2.21 | -2.71 | -3.04 | -3.53 | -3.98 | -4.45 | -4.97 | -5.45 | -5.89 | -6.39 | -6.80 |
| 6.82  | -2.31 | -2.84 | -3.16 | -3.64 | -4.08 | -4.55 | -4.93 | -5.40 | -5.82 | -6.42 | -6.87 |
| 7.02  | -2.23 | -2.65 | -3.14 | -3.59 | -4.06 | -4.51 | -5.02 | -5.30 | -5.89 | -6.30 | -6.76 |
| 7.22  | -2.17 | -2.63 | -3.09 | -3.53 | -3.97 | -4.37 | -4.91 | -5.18 | -5.79 | -6.15 | -6.64 |
| 7.42  | -2.31 | -2.70 | -3.10 | -3.59 | -4.08 | -4.58 | -4.95 | -5.27 | -5.86 | -6.25 | -6.74 |
| 7.62  | -2.32 | -2.67 | -3.09 | -3.58 | -4.00 | -4.53 | -4.89 | -5.28 | -5.87 | -6.25 | -6.68 |
| 7.82  | -2.29 | -2.75 | -3.16 | -3.63 | -4.03 | -4.48 | -5.09 | -5.39 | -5.77 | -6.21 | -6.60 |
| 8.02  | -2.27 | -2.77 | -3.18 | -3.58 | -4.14 | -4.53 | -5.08 | -5.46 | -5.85 | -6.37 | -6.73 |
| 8.22  | -2.16 | -2.69 | -3.07 | -3.60 | -3.95 | -4.42 | -4.90 | -5.28 | -5.68 | -6.13 | -6.60 |
| 8.42  | -2.43 | -2.88 | -3.24 | -3.59 | -4.16 | -4.52 | -5.11 | -5.46 | -5.85 | -6.14 | -6.76 |
| 8.62  | -2.22 | -2.58 | -3.10 | -3.58 | -3.92 | -4.37 | -4.76 | -5.19 | -5.59 | -6.15 | -6.53 |
| 8.82  | -2.17 | -2.62 | -3.12 | -3.56 | -3.96 | -4.41 | -4.87 | -5.29 | -5.81 | -6.11 | -6.63 |
| 9.02  | -2.12 | -2.68 | -3.08 | -3.56 | -3.95 | -4.34 | -4.76 | -5.33 | -5.69 | -6.13 | -6.67 |
| 9.22  | -2.29 | -2.66 | -3.09 | -3.47 | -4.03 | -4.40 | -5.11 | -5.42 | -5.71 | -6.22 | -6.68 |
| 9.42  | -2.37 | -2.67 | -3.13 | -3.62 | -4.02 | -4.40 | -4.98 | -5.31 | -5.76 | -6.22 | -6.59 |
| 9.62  | -2.16 | -2.62 | -3.15 | -3.53 | -3.86 | -4.30 | -4.96 | -5.24 | -5.67 | -6.21 | -6.69 |
| 9.82  | -2.18 | -2.64 | -3.03 | -3.49 | -3.87 | -4.26 | -4.85 | -5.12 | -5.50 | -6.04 | -6.51 |
| 10.02 | -2.27 | -2.83 | -3.23 | -3.70 | -3.96 | -4.37 | -5.01 | -5.30 | -5.81 | -6.18 | -6.56 |
| 10.22 | -2.35 | -2.74 | -3.25 | -3.62 | -4.11 | -4.41 | -5.00 | -5.31 | -5.71 | -6.24 | -6.61 |
| 10.42 | -2.19 | -2.71 | -3.12 | -3.46 | -3.97 | -4.40 | -4.87 | -5.22 | -5.59 | -5.95 | -6.47 |
| 10.62 | -2.25 | -2.60 | -2.94 | -3.51 | -3.85 | -4.32 | -4.92 | -5.16 | -5.57 | -5.96 | -6.52 |
| 10.82 | -2.18 | -2.64 | -3.01 | -3.47 | -3.88 | -4.32 | -4.76 | -5.14 | -5.49 | -6.06 | -6.49 |
| 11.02 | -2.18 | -2.62 | -3.13 | -3.57 | -3.98 | -4.32 | -4.79 | -5.17 | -5.62 | -6.04 | -6.50 |
| 11.22 | -2.22 | -2.73 | -3.21 | -3.65 | -3.91 | -4.39 | -4.80 | -5.28 | -5.61 | -6.05 | -6.47 |
| 11.42 | -2.39 | -2.67 | -3.03 | -3.60 | -3.97 | -4.37 | -4.71 | -5.16 | -5.66 | -6.03 | -6.45 |
| 11.62 | -2.26 | -2.66 | -3.04 | -3.51 | -3.92 | -4.34 | -4.87 | -5.13 | -5.58 | -6.10 | -6.48 |

|       |       |       |       |       |       |       |       |       |       |       |       |
|-------|-------|-------|-------|-------|-------|-------|-------|-------|-------|-------|-------|
| 11.82 | -2.39 | -2.80 | -3.12 | -3.51 | -3.97 | -4.44 | -4.93 | -5.19 | -5.78 | -6.13 | -6.54 |
| 12.02 | -2.11 | -2.61 | -2.98 | -3.49 | -3.80 | -4.39 | -4.81 | -5.12 | -5.59 | -5.94 | -6.42 |
| 12.22 | -2.16 | -2.58 | -3.05 | -3.49 | -3.98 | -4.28 | -4.76 | -5.23 | -5.70 | -6.08 | -6.49 |
| 12.42 | -2.24 | -2.71 | -3.12 | -3.59 | -3.92 | -4.35 | -4.79 | -5.18 | -5.60 | -5.99 | -6.45 |
| 12.62 | -2.16 | -2.62 | -3.09 | -3.42 | -3.87 | -4.31 | -4.92 | -5.20 | -5.55 | -6.04 | -6.41 |
| 12.82 | -2.31 | -2.63 | -3.14 | -3.55 | -3.88 | -4.34 | -4.81 | -5.19 | -5.57 | -5.95 | -6.46 |
| 13.02 | -2.09 | -2.56 | -2.93 | -3.44 | -3.82 | -4.28 | -4.83 | -5.16 | -5.59 | -5.97 | -6.39 |
| 13.22 | -2.30 | -2.63 | -3.14 | -3.49 | -3.98 | -4.28 | -4.77 | -5.18 | -5.53 | -5.95 | -6.48 |
| 13.42 | -2.28 | -2.69 | -3.12 | -3.58 | -3.99 | -4.37 | -4.91 | -5.23 | -5.50 | -6.01 | -6.35 |
| 13.50 | -2.33 | -2.72 | -3.16 | -3.58 | -4.03 | -4.35 | -4.84 | -5.23 | -5.71 | -5.96 | -6.45 |
| 13.59 | -2.20 | -2.66 | -2.94 | -3.46 | -3.93 | -4.21 | -4.76 | -4.99 | -5.52 | -5.96 | -6.43 |
| 13.68 | -2.30 | -2.77 | -3.13 | -3.54 | -3.93 | -4.45 | -4.82 | -5.18 | -5.58 | -6.06 | -6.39 |
| 13.78 | -2.22 | -2.73 | -3.13 | -3.61 | -3.97 | -4.27 | -4.91 | -5.20 | -5.55 | -6.05 | -6.53 |
| 13.88 | -2.28 | -2.82 | -3.08 | -3.53 | -3.91 | -4.30 | -4.78 | -5.15 | -5.54 | -5.97 | -6.45 |
| 14.00 | -2.26 | -2.63 | -3.05 | -3.53 | -3.90 | -4.36 | -4.78 | -5.19 | -5.53 | -6.04 | -6.41 |
| 14.12 | -2.42 | -2.76 | -3.26 | -3.59 | -4.05 | -4.44 | -4.95 | -5.27 | -5.67 | -6.07 | -6.45 |
| 14.25 | -2.35 | -2.80 | -3.11 | -3.55 | -3.92 | -4.32 | -4.85 | -5.20 | -5.52 | -5.94 | -6.43 |
| 14.40 | -2.30 | -2.62 | -3.11 | -3.64 | -4.14 | -4.40 | -4.93 | -5.24 | -5.67 | -6.00 | -6.54 |
| 14.55 | -2.22 | -2.68 | -3.18 | -3.66 | -3.93 | -4.32 | -4.84 | -5.23 | -5.59 | -6.03 | -6.56 |
| 14.72 | -2.23 | -2.54 | -3.06 | -3.49 | -3.96 | -4.33 | -4.87 | -5.23 | -5.58 | -5.95 | -6.42 |
| 14.90 | -2.22 | -2.61 | -2.92 | -3.42 | -3.79 | -4.29 | -4.74 | -5.07 | -5.49 | -5.93 | -6.27 |
| 15.09 | -2.29 | -2.85 | -3.12 | -3.64 | -3.90 | -4.35 | -4.87 | -5.15 | -5.52 | -6.03 | -6.43 |
| 15.30 | -2.30 | -2.75 | -3.08 | -3.58 | -3.95 | -4.37 | -4.83 | -5.21 | -5.61 | -6.04 | -6.31 |
| 15.53 | -2.31 | -2.80 | -3.31 | -3.58 | -4.07 | -4.59 | -4.93 | -5.35 | -5.66 | -6.18 | -6.56 |
| 15.77 | -2.34 | -2.76 | -3.12 | -3.55 | -3.92 | -4.32 | -4.78 | -5.16 | -5.70 | -5.95 | -6.41 |
| 16.04 | -2.22 | -2.61 | -3.08 | -3.51 | -3.96 | -4.25 | -4.87 | -5.12 | -5.61 | -5.99 | -6.46 |
| 16.32 | -2.28 | -2.78 | -3.18 | -3.58 | -3.92 | -4.37 | -4.82 | -5.14 | -5.55 | -6.01 | -6.32 |
| 16.63 | -2.35 | -2.69 | -3.14 | -3.53 | -3.96 | -4.30 | -4.87 | -5.32 | -5.61 | -5.96 | -6.29 |
| 16.96 | -2.51 | -2.77 | -3.26 | -3.73 | -4.05 | -4.47 | -4.96 | -5.26 | -5.72 | -6.00 | -6.50 |
| 17.31 | -2.25 | -2.73 | -3.09 | -3.62 | -3.90 | -4.31 | -4.96 | -5.24 | -5.52 | -6.02 | -6.55 |
| 17.70 | -2.26 | -2.67 | -3.18 | -3.68 | -4.05 | -4.48 | -4.77 | -5.28 | -5.68 | -6.08 | -6.45 |
| 18.11 | -2.32 | -2.72 | -3.21 | -3.63 | -3.96 | -4.39 | -4.82 | -5.30 | -5.63 | -5.92 | -6.48 |
| 18.56 | -2.23 | -2.69 | -3.03 | -3.48 | -3.87 | -4.30 | -4.72 | -5.13 | -5.49 | -5.98 | -6.38 |
| 19.04 | -2.33 | -2.78 | -3.13 | -3.72 | -4.03 | -4.31 | -4.94 | -5.19 | -5.56 | -5.99 | -6.39 |
| 19.56 | -2.17 | -2.63 | -3.18 | -3.62 | -3.89 | -4.37 | -4.75 | -5.10 | -5.51 | -5.96 | -6.30 |
| 20.12 | -2.51 | -2.82 | -3.29 | -3.70 | -4.09 | -4.52 | -4.99 | -5.41 | -5.70 | -6.04 | -6.54 |
| 20.72 | -2.24 | -2.64 | -3.13 | -3.53 | -3.82 | -4.25 | -4.66 | -5.19 | -5.62 | -5.92 | -6.41 |
| 21.37 | -2.23 | -2.85 | -3.23 | -3.72 | -4.00 | -4.38 | -4.79 | -5.19 | -5.48 | -5.92 | -6.43 |
| 22.08 | -2.29 | -2.75 | -3.20 | -3.56 | -4.07 | -4.47 | -5.00 | -5.22 | -5.72 | -6.04 | -6.50 |
| 22.84 | -2.41 | -2.75 | -3.14 | -3.62 | -4.02 | -4.41 | -4.93 | -5.24 | -5.69 | -5.98 | -6.46 |
| 23.65 | -2.40 | -2.75 | -3.16 | -3.50 | -3.94 | -4.34 | -4.84 | -5.21 | -5.63 | -5.97 | -6.37 |
| 24.54 | -2.45 | -2.82 | -3.27 | -3.68 | -4.09 | -4.51 | -5.01 | -5.27 | -5.68 | -5.97 | -6.38 |
| 25.49 | -2.45 | -2.84 | -3.20 | -3.73 | -3.98 | -4.51 | -4.97 | -5.27 | -5.60 | -6.02 | -6.50 |
| 26.51 | -2.55 | -2.87 | -3.39 | -3.74 | -4.14 | -4.55 | -4.95 | -5.22 | -5.66 | -6.04 | -6.49 |
| 27.62 | -2.58 | -2.90 | -3.29 | -3.78 | -4.05 | -4.48 | -4.91 | -5.28 | -5.70 | -6.15 | -6.52 |
| 28.81 | -2.38 | -2.83 | -3.13 | -3.76 | -4.00 | -4.38 | -4.91 | -5.25 | -5.65 | -5.97 | -6.37 |
| 30.10 | -2.57 | -2.97 | -3.31 | -3.77 | -4.13 | -4.48 | -5.00 | -5.32 | -5.63 | -6.05 | -6.35 |
| 31.49 | -2.42 | -2.76 | -3.13 | -3.56 | -4.06 | -4.36 | -4.81 | -5.10 | -5.56 | -5.92 | -6.36 |
| 32.98 | -2.46 | -2.81 | -3.25 | -3.67 | -3.92 | -4.34 | -4.93 | -5.14 | -5.54 | -5.90 | -6.33 |
| 34.60 | -2.44 | -2.99 | -3.39 | -3.68 | -3.97 | -4.49 | -4.91 | -5.32 | -5.60 | -5.96 | -6.49 |

|        |       |       |       |       |       |       |       |       |       |       |       |
|--------|-------|-------|-------|-------|-------|-------|-------|-------|-------|-------|-------|
| 36.34  | -2.58 | -2.96 | -3.26 | -3.84 | -4.18 | -4.48 | -5.06 | -5.34 | -5.69 | -6.03 | -6.54 |
| 38.21  | -2.43 | -2.84 | -3.17 | -3.61 | -3.97 | -4.33 | -4.90 | -5.10 | -5.57 | -5.89 | -6.31 |
| 40.24  | -2.50 | -2.89 | -3.30 | -3.77 | -4.11 | -4.42 | -5.01 | -5.22 | -5.61 | -6.06 | -6.43 |
| 42.42  | -2.48 | -2.86 | -3.37 | -3.76 | -4.05 | -4.45 | -4.88 | -5.23 | -5.55 | -5.89 | -6.40 |
| 44.78  | -2.52 | -3.02 | -3.36 | -3.72 | -4.11 | -4.39 | -4.90 | -5.18 | -5.64 | -5.83 | -6.29 |
| 47.32  | -2.48 | -2.81 | -3.32 | -3.76 | -4.04 | -4.43 | -4.88 | -5.12 | -5.60 | -5.94 | -6.39 |
| 50.06  | -2.58 | -2.78 | -3.25 | -3.66 | -4.10 | -4.48 | -4.89 | -5.33 | -5.60 | -5.85 | -6.28 |
| 53.01  | -2.61 | -2.96 | -3.37 | -3.89 | -4.13 | -4.61 | -5.00 | -5.30 | -5.85 | -5.97 | -6.45 |
| 56.20  | -2.51 | -3.03 | -3.30 | -3.79 | -4.15 | -4.60 | -4.95 | -5.28 | -5.61 | -5.97 | -6.40 |
| 59.64  | -2.61 | -3.03 | -3.43 | -3.85 | -4.09 | -4.55 | -4.94 | -5.35 | -5.69 | -6.01 | -6.36 |
| 63.34  | -2.47 | -2.99 | -3.35 | -3.64 | -4.11 | -4.45 | -4.90 | -5.07 | -5.50 | -5.86 | -6.27 |
| 67.34  | -2.51 | -2.97 | -3.34 | -3.88 | -4.19 | -4.51 | -4.91 | -5.27 | -5.55 | -5.83 | -6.17 |
| 71.65  | -2.60 | -3.01 | -3.43 | -3.82 | -4.19 | -4.62 | -5.05 | -5.37 | -5.61 | -6.08 | -6.45 |
| 76.30  | -2.55 | -2.96 | -3.33 | -3.70 | -4.07 | -4.39 | -5.05 | -5.22 | -5.55 | -5.93 | -6.29 |
| 81.32  | -2.58 | -3.02 | -3.41 | -3.74 | -4.17 | -4.56 | -4.96 | -5.29 | -5.70 | -6.03 | -6.47 |
| 86.73  | -2.49 | -2.97 | -3.32 | -3.81 | -4.21 | -4.47 | -5.04 | -5.25 | -5.64 | -5.99 | -6.37 |
| 92.56  | -2.50 | -3.00 | -3.46 | -3.73 | -4.14 | -4.53 | -4.87 | -5.15 | -5.60 | -5.92 | -6.26 |
| 98.85  | -2.57 | -3.04 | -3.42 | -3.79 | -4.11 | -4.48 | -4.94 | -5.29 | -5.55 | -5.99 | -6.33 |
| 105.64 | -2.54 | -2.95 | -3.28 | -3.79 | -4.08 | -4.48 | -4.89 | -5.15 | -5.43 | -5.85 | -6.26 |
| 112.96 | -2.61 | -3.04 | -3.48 | -3.80 | -4.10 | -4.56 | -4.97 | -5.29 | -5.60 | -5.99 | -6.36 |
| 120.85 | -2.67 | -2.95 | -3.44 | -3.78 | -4.20 | -4.59 | -5.11 | -5.33 | -5.50 | -6.00 | -6.35 |
| 129.36 | -2.63 | -2.95 | -3.39 | -3.76 | -4.09 | -4.51 | -4.97 | -5.27 | -5.59 | -5.94 | -6.36 |
| 138.55 | -2.42 | -2.83 | -3.22 | -3.65 | -4.11 | -4.42 | -4.82 | -5.27 | -5.49 | -5.79 | -6.27 |
| 148.45 | -2.57 | -3.00 | -3.41 | -3.86 | -4.12 | -4.55 | -4.97 | -5.22 | -5.51 | -5.89 | -6.35 |
| 159.13 | -2.69 | -2.91 | -3.36 | -3.74 | -4.10 | -4.44 | -4.90 | -5.17 | -5.53 | -5.89 | -6.25 |
| 170.65 | -2.63 | -3.14 | -3.60 | -3.88 | -4.20 | -4.71 | -5.05 | -5.34 | -5.63 | -5.89 | -6.32 |
| 183.07 | -2.52 | -2.98 | -3.42 | -3.77 | -4.16 | -4.56 | -4.91 | -5.23 | -5.39 | -5.82 | -6.20 |
| 196.47 | -2.56 | -3.10 | -3.46 | -3.80 | -4.25 | -4.49 | -4.83 | -5.34 | -5.61 | -5.99 | -6.22 |
| 210.91 | -2.70 | -3.06 | -3.43 | -3.84 | -4.26 | -4.62 | -4.96 | -5.19 | -5.47 | -5.94 | -6.25 |
| 226.50 | -2.58 | -2.93 | -3.45 | -3.77 | -4.08 | -4.48 | -4.82 | -5.10 | -5.39 | -5.70 | -6.07 |
| 243.31 | -2.56 | -2.98 | -3.38 | -3.76 | -4.03 | -4.32 | -4.81 | -5.03 | -5.43 | -5.79 | -6.05 |
| 261.43 | -2.55 | -3.03 | -3.36 | -3.84 | -4.07 | -4.55 | -4.92 | -5.11 | -5.45 | -5.85 | -6.19 |
| 280.98 | -2.42 | -2.82 | -3.32 | -3.68 | -4.00 | -4.45 | -4.82 | -5.04 | -5.41 | -5.73 | -6.00 |
| 302.07 | -2.48 | -2.83 | -3.21 | -3.66 | -3.96 | -4.30 | -4.78 | -4.94 | -5.28 | -5.66 | -5.96 |
| 324.81 | -2.62 | -3.00 | -3.39 | -3.77 | -4.21 | -4.51 | -4.97 | -5.11 | -5.39 | -5.70 | -6.09 |
| 349.33 | -2.59 | -2.91 | -3.23 | -3.68 | -4.00 | -4.28 | -4.71 | -5.01 | -5.22 | -5.51 | -5.92 |
| 375.79 | -2.48 | -2.95 | -3.35 | -3.72 | -4.01 | -4.30 | -4.74 | -5.06 | -5.33 | -5.73 | -5.94 |
| 404.31 | -2.47 | -2.92 | -3.36 | -3.71 | -3.95 | -4.33 | -4.62 | -4.96 | -5.27 | -5.49 | -5.87 |
| 435.08 | -2.67 | -2.93 | -3.31 | -3.70 | -4.07 | -4.42 | -4.84 | -5.10 | -5.32 | -5.57 | -5.87 |
| 468.27 | -2.54 | -2.90 | -3.24 | -3.63 | -4.09 | -4.27 | -4.62 | -4.95 | -5.13 | -5.49 | -5.76 |
| 504.06 | -2.63 | -2.99 | -3.37 | -3.62 | -4.04 | -4.32 | -4.73 | -4.95 | -5.28 | -5.65 | -5.80 |
| 542.66 | -2.61 | -3.03 | -3.26 | -3.73 | -3.99 | -4.28 | -4.66 | -4.86 | -5.14 | -5.50 | -5.80 |
| 584.29 | -2.57 | -2.90 | -3.32 | -3.64 | -4.04 | -4.26 | -4.61 | -4.88 | -5.14 | -5.51 | -5.72 |
| 629.18 | -2.42 | -2.85 | -3.12 | -3.59 | -3.82 | -4.17 | -4.54 | -4.83 | -5.03 | -5.30 | -5.71 |
| 677.61 | -2.47 | -2.87 | -3.23 | -3.70 | -4.02 | -4.22 | -4.64 | -4.86 | -5.09 | -5.33 | -5.79 |
| 729.83 | -2.51 | -2.84 | -3.18 | -3.51 | -3.94 | -4.18 | -4.49 | -4.86 | -5.01 | -5.22 | -5.57 |
| 786.16 | -2.45 | -2.74 | -3.10 | -3.46 | -3.84 | -4.24 | -4.45 | -4.80 | -5.02 | -5.34 | -5.57 |
| 846.90 | -2.62 | -2.92 | -3.27 | -3.60 | -4.06 | -4.27 | -4.60 | -4.92 | -5.06 | -5.33 | -5.67 |
| 912.42 | -2.70 | -2.98 | -3.23 | -3.63 | -4.01 | -4.24 | -4.60 | -4.92 | -5.12 | -5.36 | -5.76 |
| 983.08 | -2.52 | -2.95 | -3.20 | -3.59 | -3.84 | -4.17 | -4.56 | -4.77 | -5.16 | -5.37 | -5.67 |

|         |       |       |       |       |       |       |       |       |       |       |       |
|---------|-------|-------|-------|-------|-------|-------|-------|-------|-------|-------|-------|
| 1059.29 | -2.57 | -2.93 | -3.24 | -3.65 | -3.89 | -4.17 | -4.55 | -4.76 | -5.06 | -5.38 | -5.64 |
| 1141.48 | -2.70 | -3.08 | -3.33 | -3.66 | -4.01 | -4.33 | -4.67 | -4.85 | -5.10 | -5.45 | -5.73 |
| 1230.13 | -2.58 | -2.89 | -3.16 | -3.62 | -4.00 | -4.19 | -4.47 | -4.80 | -5.04 | -5.32 | -5.56 |
| 1325.73 | -2.55 | -2.91 | -3.22 | -3.67 | -3.93 | -4.16 | -4.53 | -4.73 | -5.06 | -5.33 | -5.65 |
| 1428.84 | -2.69 | -2.98 | -3.42 | -3.80 | -4.10 | -4.24 | -4.80 | -4.93 | -5.22 | -5.45 | -5.74 |
| 1540.05 | -2.74 | -3.12 | -3.52 | -3.77 | -4.14 | -4.44 | -4.61 | -5.00 | -5.29 | -5.43 | -5.69 |
| 1659.99 | -2.77 | -3.08 | -3.49 | -3.80 | -4.06 | -4.37 | -4.62 | -4.92 | -5.25 | -5.42 | -5.73 |
| 1789.34 | -2.79 | -3.20 | -3.52 | -4.00 | -4.15 | -4.47 | -4.82 | -5.12 | -5.30 | -5.56 | -5.80 |
| 1928.85 | -2.72 | -3.07 | -3.43 | -3.82 | -4.02 | -4.44 | -4.73 | -5.09 | -5.26 | -5.48 | -5.77 |
| 2079.31 | -2.83 | -3.17 | -3.61 | -3.93 | -4.27 | -4.41 | -4.73 | -5.12 | -5.27 | -5.57 | -5.86 |
| 2241.59 | -2.84 | -3.32 | -3.56 | -3.97 | -4.30 | -4.48 | -4.81 | -5.09 | -5.20 | -5.62 | -5.82 |
| 2416.60 | -2.71 | -3.06 | -3.49 | -3.92 | -4.20 | -4.41 | -4.86 | -5.09 | -5.19 | -5.57 | -5.86 |
| 2605.36 | -2.81 | -3.14 | -3.62 | -3.85 | -4.13 | -4.47 | -4.84 | -5.07 | -5.30 | -5.60 | -5.82 |
| 2808.94 | -2.89 | -3.36 | -3.71 | -4.02 | -4.25 | -4.61 | -4.95 | -5.04 | -5.42 | -5.66 | -5.91 |
| 3028.50 | -2.79 | -3.12 | -3.48 | -3.89 | -4.26 | -4.58 | -4.87 | -5.08 | -5.25 | -5.59 | -5.86 |
| 3265.30 | -2.80 | -3.13 | -3.47 | -3.75 | -4.19 | -4.49 | -4.78 | -5.05 | -5.25 | -5.50 | -5.74 |
| 3520.69 | -2.72 | -3.07 | -3.40 | -3.80 | -4.00 | -4.32 | -4.59 | -4.86 | -5.13 | -5.42 | -5.67 |
| 3796.13 | -2.61 | -3.05 | -3.37 | -3.73 | -3.94 | -4.28 | -4.56 | -4.76 | -5.08 | -5.28 | -5.58 |

| Wavelength (nm) | 475.07 | 476.49 | 477.92 | 479.34 | 480.77 | 482.19 | 483.61 | 485.04 | 486.46 | 487.89 | 489.31 |
|-----------------|--------|--------|--------|--------|--------|--------|--------|--------|--------|--------|--------|
| Time (ps)       |        |        |        |        |        |        |        |        |        |        |        |
| -3.78           | 0.10   | 0.10   | 0.07   | 0.10   | 0.08   | 0.06   | 0.04   | 0.11   | 0.15   | 0.09   | 0.02   |
| -3.28           | 0.15   | 0.01   | 0.11   | 0.07   | 0.02   | 0.07   | 0.04   | 0.11   | 0.04   | 0.09   | 0.08   |
| -2.78           | -0.05  | -0.09  | 0.01   | -0.06  | -0.09  | -0.04  | 0.02   | -0.06  | -0.08  | -0.07  | -0.10  |
| -2.28           | -0.06  | 0.01   | 0.02   | -0.09  | 0.07   | -0.03  | -0.05  | 0.04   | 0.07   | 0.01   | 0.01   |
| -1.78           | 0.02   | 0.03   | -0.01  | 0.05   | -0.01  | 0.05   | 0.02   | -0.02  | -0.05  | -0.03  | 0.00   |
| -1.28           | -0.01  | -0.08  | -0.16  | -0.19  | -0.06  | -0.12  | 0.00   | -0.13  | -0.16  | -0.09  | -0.01  |
| -0.78           | -0.15  | -0.03  | -0.11  | 0.07   | 0.01   | -0.02  | -0.07  | -0.04  | 0.01   | 0.00   | -0.01  |
| -0.28           | 0.01   | 0.05   | 0.07   | 0.04   | -0.02  | 0.03   | 0.00   | -0.01  | 0.02   | 0.00   | 0.01   |
| -0.18           | 0.00   | 0.01   | 0.05   | 0.04   | 0.03   | -0.07  | 0.10   | 0.08   | 0.03   | 0.05   | 0.01   |
| -0.08           | 0.03   | 0.01   | 0.02   | 0.04   | 0.05   | 0.08   | 0.05   | 0.08   | 0.16   | 0.03   | 0.12   |
| 0.02            | 0.08   | 0.05   | 0.05   | 0.07   | 0.01   | -0.08  | 0.03   | 0.12   | 0.07   | -0.04  | -0.04  |
| 0.12            | 0.10   | 0.11   | 0.05   | 0.06   | 0.03   | -0.05  | 0.00   | 0.02   | 0.07   | 0.09   | 0.12   |
| 0.22            | -0.05  | -0.10  | -0.14  | -0.13  | -0.04  | -0.11  | -0.09  | -0.07  | -0.01  | -0.11  | 0.01   |
| 0.27            | 0.01   | -0.04  | 0.04   | 0.13   | 0.04   | 0.00   | -0.03  | 0.09   | -0.01  | -0.06  | -0.07  |
| 0.32            | 0.11   | 0.10   | 0.09   | 0.13   | 0.24   | 0.10   | 0.16   | 0.12   | 0.15   | 0.14   | 0.13   |
| 0.37            | -0.02  | -0.04  | 0.00   | -0.05  | 0.00   | -0.09  | -0.04  | 0.01   | -0.09  | -0.06  | -0.05  |
| 0.42            | -0.07  | -0.05  | -0.02  | -0.09  | -0.08  | -0.08  | -0.13  | -0.11  | -0.17  | -0.21  | -0.08  |
| 0.47            | -0.08  | -0.03  | -0.04  | -0.11  | -0.09  | -0.15  | -0.10  | -0.14  | -0.06  | -0.06  | -0.05  |
| 0.52            | 0.04   | 0.01   | -0.02  | 0.04   | 0.10   | -0.03  | -0.03  | 0.01   | 0.01   | -0.05  | -0.04  |
| 0.57            | 0.15   | 0.14   | 0.14   | 0.02   | 0.13   | 0.03   | 0.10   | 0.12   | 0.10   | 0.10   | 0.13   |
| 0.62            | 0.03   | -0.02  | 0.05   | -0.01  | -0.06  | -0.03  | -0.02  | -0.04  | 0.01   | 0.01   | -0.02  |
| 0.67            | -0.02  | -0.14  | -0.02  | -0.09  | -0.04  | -0.08  | -0.06  | -0.06  | -0.04  | -0.05  | -0.20  |
| 0.72            | -0.04  | 0.02   | 0.01   | 0.03   | -0.10  | -0.09  | -0.11  | -0.08  | -0.06  | -0.04  | -0.09  |
| 0.77            | -0.07  | -0.01  | -0.04  | -0.09  | -0.12  | -0.10  | -0.08  | -0.08  | -0.02  | -0.04  | -0.09  |
| 0.82            | 0.01   | -0.01  | -0.03  | 0.00   | 0.01   | -0.11  | 0.02   | 0.00   | 0.07   | -0.06  | 0.01   |
| 0.87            | -0.11  | -0.02  | -0.06  | 0.05   | -0.02  | -0.05  | -0.01  | -0.01  | -0.01  | -0.12  | -0.07  |
| 0.92            | -0.05  | -0.02  | 0.00   | 0.01   | -0.02  | 0.02   | -0.08  | -0.03  | 0.03   | -0.03  | 0.04   |

|      |        |        |        |        |        |        |        |        |        |        |        |
|------|--------|--------|--------|--------|--------|--------|--------|--------|--------|--------|--------|
| 0.97 | 0.04   | 0.02   | 0.08   | 0.06   | -0.04  | -0.08  | 0.04   | -0.01  | 0.00   | -0.04  | -0.05  |
| 1.02 | -0.01  | -0.07  | 0.02   | -0.12  | 0.05   | 0.02   | -0.01  | 0.05   | -0.07  | 0.02   | -0.06  |
| 1.07 | 0.16   | 0.05   | -0.04  | -0.02  | 0.14   | -0.03  | -0.12  | 0.00   | 0.05   | 0.04   | 0.08   |
| 1.12 | -29.93 | -21.84 | -13.84 | -6.85  | -1.85  | 0.75   | 1.54   | 0.89   | -0.27  | -1.10  | -1.40  |
| 1.17 | 72.76  | 52.27  | 33.63  | 17.24  | 3.84   | -7.14  | -16.04 | -24.05 | -30.78 | -36.19 | -40.13 |
| 1.22 | -12.57 | 9.87   | 32.21  | 53.14  | 72.90  | 90.64  | 105.96 | 117.38 | 125.05 | 128.15 | 126.16 |
| 1.27 | -4.84  | -4.44  | -6.33  | -12.16 | -21.72 | -34.71 | -49.33 | -63.83 | -76.09 | -84.43 | -87.70 |
| 1.32 | -10.96 | -11.61 | -11.51 | -10.93 | -10.02 | -8.78  | -7.26  | -6.30  | -6.10  | -7.26  | -9.55  |
| 1.37 | -6.42  | -6.64  | -7.30  | -8.51  | -10.05 | -11.39 | -12.36 | -13.01 | -13.38 | -13.48 | -13.47 |
| 1.42 | -8.41  | -8.56  | -8.46  | -8.58  | -9.26  | -10.31 | -11.65 | -13.22 | -14.48 | -15.55 | -16.09 |
| 1.47 | -7.68  | -9.37  | -10.87 | -11.81 | -12.04 | -11.97 | -11.68 | -11.44 | -11.54 | -12.09 | -12.94 |
| 1.52 | -7.24  | -7.64  | -8.42  | -9.57  | -11.00 | -12.10 | -13.01 | -13.44 | -13.29 | -13.08 | -12.70 |
| 1.57 | -9.43  | -9.56  | -9.32  | -9.01  | -8.88  | -9.34  | -10.14 | -11.47 | -12.89 | -14.19 | -15.07 |
| 1.62 | -7.13  | -8.68  | -10.07 | -11.06 | -11.61 | -11.62 | -11.41 | -11.13 | -11.09 | -11.60 | -12.35 |
| 1.67 | -7.47  | -7.52  | -8.20  | -9.29  | -10.55 | -11.83 | -12.80 | -13.54 | -13.73 | -13.70 | -13.33 |
| 1.72 | -9.08  | -9.90  | -10.29 | -10.40 | -10.24 | -10.11 | -10.26 | -10.63 | -11.49 | -12.48 | -13.43 |
| 1.77 | -6.94  | -7.68  | -8.65  | -9.79  | -10.90 | -11.88 | -12.20 | -12.26 | -12.13 | -12.03 | -12.09 |
| 1.82 | -8.29  | -8.14  | -8.16  | -8.38  | -8.99  | -10.01 | -11.22 | -12.30 | -13.06 | -13.64 | -13.83 |
| 1.87 | -8.32  | -9.40  | -10.22 | -10.52 | -10.75 | -10.66 | -10.69 | -11.02 | -11.48 | -12.31 | -13.11 |
| 1.92 | -7.17  | -7.53  | -8.24  | -9.26  | -10.30 | -11.40 | -12.16 | -12.52 | -12.63 | -12.42 | -12.25 |
| 1.97 | -8.55  | -8.83  | -8.78  | -8.88  | -8.99  | -9.43  | -10.18 | -11.00 | -12.03 | -12.92 | -13.59 |
| 2.02 | -7.19  | -8.03  | -9.00  | -9.89  | -10.54 | -11.05 | -11.21 | -11.33 | -11.25 | -11.53 | -11.93 |
| 2.07 | -7.26  | -7.51  | -8.18  | -9.15  | -10.18 | -11.22 | -11.90 | -12.37 | -12.49 | -12.56 | -12.38 |
| 2.12 | -8.49  | -9.14  | -9.47  | -9.73  | -9.67  | -9.89  | -10.22 | -10.80 | -11.35 | -12.08 | -12.78 |
| 2.17 | -7.12  | -7.98  | -8.95  | -9.74  | -10.46 | -10.92 | -11.01 | -11.21 | -11.23 | -11.49 | -11.66 |
| 2.22 | -7.85  | -8.18  | -8.33  | -8.66  | -9.22  | -10.03 | -10.83 | -11.74 | -12.40 | -12.90 | -13.04 |
| 2.27 | -7.95  | -8.80  | -9.51  | -9.96  | -10.13 | -10.34 | -10.37 | -10.68 | -11.08 | -11.72 | -12.33 |
| 2.32 | -6.95  | -7.61  | -8.22  | -9.06  | -9.90  | -10.74 | -11.23 | -11.52 | -11.69 | -11.73 | -11.62 |
| 2.37 | -8.21  | -8.56  | -8.84  | -8.90  | -9.24  | -9.80  | -10.50 | -11.14 | -11.87 | -12.45 | -12.88 |
| 2.42 | -7.73  | -8.57  | -9.36  | -9.92  | -10.22 | -10.43 | -10.64 | -10.84 | -11.17 | -11.65 | -12.13 |
| 2.47 | -7.24  | -7.66  | -8.26  | -9.06  | -9.74  | -10.50 | -11.15 | -11.65 | -11.85 | -12.05 | -12.08 |
| 2.52 | -8.15  | -8.71  | -9.11  | -9.39  | -9.54  | -9.88  | -10.28 | -10.75 | -11.46 | -12.17 | -12.69 |
| 2.57 | -7.34  | -8.06  | -8.78  | -9.55  | -10.15 | -10.76 | -11.02 | -11.18 | -11.27 | -11.54 | -11.89 |
| 2.62 | -7.75  | -7.93  | -8.29  | -8.85  | -9.45  | -10.27 | -10.97 | -11.54 | -11.98 | -12.26 | -12.33 |
| 2.67 | -7.98  | -8.54  | -8.93  | -9.24  | -9.58  | -9.97  | -10.08 | -10.61 | -11.10 | -11.70 | -12.09 |
| 2.72 | -7.07  | -7.58  | -8.29  | -9.09  | -9.82  | -10.46 | -10.93 | -11.13 | -11.37 | -11.47 | -11.65 |
| 2.77 | -7.81  | -8.15  | -8.53  | -8.87  | -9.16  | -9.80  | -10.39 | -11.01 | -11.69 | -12.04 | -12.35 |
| 2.82 | -7.55  | -8.35  | -8.92  | -9.43  | -9.77  | -10.21 | -10.39 | -10.66 | -11.00 | -11.37 | -11.80 |
| 2.87 | -7.37  | -7.66  | -8.26  | -8.81  | -9.52  | -10.10 | -10.64 | -10.96 | -11.34 | -11.59 | -11.85 |
| 2.92 | -7.94  | -8.40  | -8.76  | -9.09  | -9.30  | -9.69  | -10.13 | -10.68 | -11.18 | -11.79 | -12.21 |
| 2.97 | -7.21  | -7.82  | -8.56  | -9.20  | -9.85  | -10.24 | -10.56 | -10.87 | -10.93 | -11.23 | -11.46 |
| 3.02 | -7.44  | -7.77  | -8.17  | -8.70  | -9.26  | -9.86  | -10.52 | -11.06 | -11.33 | -11.65 | -11.90 |
| 3.07 | -7.77  | -8.34  | -8.76  | -9.22  | -9.46  | -9.92  | -10.34 | -10.71 | -11.06 | -11.50 | -11.99 |
| 3.12 | -7.18  | -7.79  | -8.41  | -9.04  | -9.73  | -10.17 | -10.47 | -10.78 | -10.97 | -11.24 | -11.41 |
| 3.17 | -7.65  | -8.07  | -8.40  | -8.82  | -9.21  | -9.91  | -10.28 | -10.85 | -11.28 | -11.66 | -11.89 |
| 3.22 | -7.48  | -8.13  | -8.86  | -9.37  | -9.72  | -10.06 | -10.31 | -10.59 | -10.91 | -11.27 | -11.66 |
| 3.42 | -7.39  | -7.93  | -8.33  | -8.88  | -9.45  | -10.03 | -10.57 | -10.95 | -11.37 | -11.50 | -11.82 |
| 3.62 | -7.68  | -8.21  | -8.65  | -9.09  | -9.60  | -10.01 | -10.29 | -10.64 | -11.11 | -11.51 | -11.88 |
| 3.82 | -7.37  | -7.82  | -8.26  | -8.91  | -9.41  | -9.91  | -10.44 | -10.84 | -11.20 | -11.55 | -11.66 |
| 4.02 | -7.52  | -7.95  | -8.62  | -8.97  | -9.42  | -9.90  | -10.14 | -10.62 | -10.98 | -11.36 | -11.60 |

|       |       |       |       |       |       |       |        |        |        |        |        |
|-------|-------|-------|-------|-------|-------|-------|--------|--------|--------|--------|--------|
| 4.22  | -7.30 | -7.79 | -8.22 | -8.84 | -9.37 | -9.88 | -10.35 | -10.73 | -10.96 | -11.34 | -11.46 |
| 4.42  | -7.45 | -7.89 | -8.42 | -8.87 | -9.28 | -9.77 | -10.11 | -10.46 | -10.93 | -11.16 | -11.51 |
| 4.62  | -7.26 | -7.81 | -8.37 | -8.82 | -9.38 | -9.86 | -10.25 | -10.70 | -10.93 | -11.26 | -11.46 |
| 4.82  | -7.45 | -7.79 | -8.38 | -8.75 | -9.21 | -9.60 | -10.05 | -10.41 | -10.77 | -11.15 | -11.32 |
| 5.02  | -7.50 | -7.94 | -8.42 | -8.96 | -9.37 | -9.91 | -10.28 | -10.54 | -10.85 | -11.18 | -11.38 |
| 5.22  | -7.23 | -7.81 | -8.30 | -8.79 | -9.14 | -9.63 | -10.02 | -10.39 | -10.78 | -11.20 | -11.40 |
| 5.42  | -7.30 | -7.85 | -8.30 | -8.79 | -9.23 | -9.85 | -10.19 | -10.51 | -10.84 | -11.03 | -11.29 |
| 5.62  | -7.26 | -7.78 | -8.19 | -8.68 | -9.04 | -9.64 | -10.01 | -10.34 | -10.66 | -11.00 | -11.22 |
| 5.82  | -7.27 | -7.85 | -8.30 | -8.78 | -9.15 | -9.63 | -10.01 | -10.46 | -10.74 | -10.96 | -11.23 |
| 6.02  | -7.28 | -7.71 | -8.13 | -8.54 | -9.02 | -9.47 | -9.89  | -10.29 | -10.51 | -10.89 | -11.12 |
| 6.22  | -7.28 | -7.79 | -8.31 | -8.76 | -9.13 | -9.69 | -10.05 | -10.32 | -10.58 | -11.00 | -11.17 |
| 6.42  | -7.27 | -7.79 | -8.23 | -8.70 | -9.10 | -9.60 | -10.00 | -10.32 | -10.65 | -10.91 | -11.19 |
| 6.62  | -7.21 | -7.77 | -8.20 | -8.64 | -9.14 | -9.56 | -9.92  | -10.27 | -10.56 | -10.88 | -11.08 |
| 6.82  | -7.30 | -7.81 | -8.18 | -8.70 | -9.19 | -9.53 | -9.87  | -10.19 | -10.50 | -10.89 | -11.07 |
| 7.02  | -7.19 | -7.68 | -8.18 | -8.55 | -9.04 | -9.48 | -9.77  | -10.17 | -10.45 | -10.80 | -10.93 |
| 7.22  | -7.08 | -7.60 | -7.94 | -8.53 | -8.93 | -9.44 | -9.83  | -10.08 | -10.37 | -10.69 | -10.87 |
| 7.42  | -7.18 | -7.69 | -8.11 | -8.70 | -9.10 | -9.50 | -9.91  | -10.20 | -10.53 | -10.85 | -11.01 |
| 7.62  | -7.21 | -7.57 | -8.09 | -8.54 | -8.91 | -9.42 | -9.86  | -10.05 | -10.42 | -10.69 | -10.93 |
| 7.82  | -7.09 | -7.61 | -8.01 | -8.49 | -8.88 | -9.42 | -9.74  | -9.95  | -10.30 | -10.49 | -10.75 |
| 8.02  | -7.15 | -7.64 | -8.03 | -8.58 | -8.99 | -9.33 | -9.81  | -10.11 | -10.40 | -10.57 | -10.80 |
| 8.22  | -7.05 | -7.45 | -7.89 | -8.44 | -8.74 | -9.26 | -9.57  | -9.86  | -10.14 | -10.39 | -10.54 |
| 8.42  | -7.23 | -7.68 | -8.07 | -8.54 | -8.96 | -9.48 | -9.67  | -10.09 | -10.35 | -10.61 | -10.76 |
| 8.62  | -7.03 | -7.52 | -7.96 | -8.39 | -8.74 | -9.22 | -9.55  | -9.81  | -10.16 | -10.39 | -10.50 |
| 8.82  | -7.07 | -7.49 | -8.00 | -8.43 | -8.77 | -9.27 | -9.64  | -9.86  | -10.15 | -10.47 | -10.70 |
| 9.02  | -7.07 | -7.47 | -7.91 | -8.39 | -8.73 | -9.26 | -9.50  | -9.86  | -10.12 | -10.41 | -10.54 |
| 9.22  | -7.09 | -7.47 | -7.99 | -8.35 | -8.86 | -9.34 | -9.59  | -9.93  | -10.23 | -10.54 | -10.62 |
| 9.42  | -7.03 | -7.52 | -7.83 | -8.37 | -8.70 | -9.18 | -9.52  | -9.78  | -10.09 | -10.41 | -10.63 |
| 9.62  | -7.08 | -7.46 | -7.92 | -8.33 | -8.81 | -9.25 | -9.58  | -9.93  | -10.22 | -10.45 | -10.56 |
| 9.82  | -7.04 | -7.42 | -7.78 | -8.21 | -8.69 | -9.06 | -9.44  | -9.60  | -10.00 | -10.32 | -10.50 |
| 10.02 | -6.92 | -7.50 | -7.84 | -8.36 | -8.72 | -9.19 | -9.50  | -9.84  | -10.02 | -10.38 | -10.49 |
| 10.22 | -7.06 | -7.58 | -7.97 | -8.40 | -8.77 | -9.18 | -9.54  | -9.80  | -10.19 | -10.45 | -10.47 |
| 10.42 | -6.84 | -7.36 | -7.78 | -8.25 | -8.75 | -9.09 | -9.40  | -9.81  | -10.01 | -10.28 | -10.58 |
| 10.62 | -6.95 | -7.38 | -7.88 | -8.16 | -8.54 | -9.17 | -9.48  | -9.80  | -10.02 | -10.40 | -10.54 |
| 10.82 | -6.88 | -7.38 | -7.83 | -8.25 | -8.66 | -9.01 | -9.38  | -9.72  | -10.00 | -10.23 | -10.47 |
| 11.02 | -6.87 | -7.26 | -7.81 | -8.19 | -8.68 | -9.04 | -9.38  | -9.69  | -9.96  | -10.19 | -10.33 |
| 11.22 | -6.89 | -7.42 | -7.81 | -8.13 | -8.58 | -9.09 | -9.37  | -9.73  | -10.01 | -10.21 | -10.32 |
| 11.42 | -6.89 | -7.31 | -7.71 | -8.14 | -8.49 | -8.95 | -9.32  | -9.50  | -9.79  | -10.11 | -10.18 |
| 11.62 | -6.81 | -7.28 | -7.87 | -8.21 | -8.56 | -9.04 | -9.31  | -9.63  | -9.97  | -10.20 | -10.33 |
| 11.82 | -6.97 | -7.39 | -7.85 | -8.32 | -8.57 | -9.04 | -9.41  | -9.73  | -9.96  | -10.20 | -10.40 |
| 12.02 | -6.74 | -7.31 | -7.72 | -8.26 | -8.54 | -9.01 | -9.28  | -9.54  | -9.80  | -10.09 | -10.26 |
| 12.22 | -7.00 | -7.35 | -7.70 | -8.20 | -8.64 | -9.13 | -9.29  | -9.67  | -10.03 | -10.27 | -10.46 |
| 12.42 | -6.93 | -7.40 | -7.69 | -8.17 | -8.49 | -9.00 | -9.27  | -9.55  | -9.80  | -10.08 | -10.27 |
| 12.62 | -6.79 | -7.28 | -7.77 | -8.06 | -8.47 | -8.90 | -9.29  | -9.66  | -9.81  | -10.03 | -10.23 |
| 12.82 | -6.82 | -7.22 | -7.67 | -8.13 | -8.36 | -8.82 | -9.20  | -9.35  | -9.67  | -9.92  | -10.01 |
| 13.02 | -6.86 | -7.33 | -7.77 | -8.17 | -8.62 | -8.99 | -9.33  | -9.57  | -9.85  | -10.07 | -10.30 |
| 13.22 | -6.76 | -7.37 | -7.60 | -8.11 | -8.54 | -8.91 | -9.21  | -9.54  | -9.78  | -10.03 | -10.25 |
| 13.42 | -6.89 | -7.35 | -7.70 | -8.22 | -8.45 | -9.03 | -9.27  | -9.58  | -9.75  | -10.10 | -10.32 |
| 13.50 | -6.91 | -7.26 | -7.61 | -8.11 | -8.53 | -8.95 | -9.28  | -9.49  | -9.73  | -9.89  | -9.97  |
| 13.59 | -6.83 | -7.26 | -7.73 | -8.09 | -8.50 | -8.87 | -9.25  | -9.55  | -9.86  | -10.09 | -10.20 |
| 13.68 | -6.86 | -7.27 | -7.69 | -8.15 | -8.46 | -8.94 | -9.16  | -9.55  | -9.76  | -10.07 | -10.05 |

|       |       |       |       |       |       |       |       |       |       |        |        |
|-------|-------|-------|-------|-------|-------|-------|-------|-------|-------|--------|--------|
| 13.78 | -6.89 | -7.32 | -7.67 | -8.04 | -8.56 | -8.93 | -9.22 | -9.48 | -9.75 | -10.00 | -10.09 |
| 13.88 | -6.78 | -7.27 | -7.72 | -8.11 | -8.48 | -8.95 | -9.21 | -9.56 | -9.77 | -10.03 | -10.13 |
| 14.00 | -6.88 | -7.29 | -7.71 | -8.10 | -8.49 | -9.01 | -9.29 | -9.55 | -9.81 | -10.08 | -10.21 |
| 14.12 | -7.01 | -7.44 | -7.78 | -8.23 | -8.61 | -8.99 | -9.35 | -9.57 | -9.87 | -10.13 | -10.30 |
| 14.25 | -6.92 | -7.22 | -7.61 | -8.12 | -8.49 | -8.83 | -9.21 | -9.43 | -9.72 | -9.97  | -10.12 |
| 14.40 | -6.98 | -7.44 | -7.92 | -8.29 | -8.60 | -9.04 | -9.40 | -9.67 | -9.92 | -10.19 | -10.40 |
| 14.55 | -6.82 | -7.29 | -7.70 | -8.20 | -8.48 | -8.86 | -9.16 | -9.55 | -9.84 | -9.93  | -10.22 |
| 14.72 | -6.82 | -7.17 | -7.54 | -8.12 | -8.42 | -8.83 | -9.11 | -9.40 | -9.65 | -9.98  | -10.10 |
| 14.90 | -6.74 | -7.05 | -7.53 | -7.90 | -8.31 | -8.80 | -9.01 | -9.27 | -9.55 | -9.75  | -9.99  |
| 15.09 | -6.82 | -7.24 | -7.66 | -8.01 | -8.39 | -8.82 | -9.17 | -9.36 | -9.58 | -9.88  | -10.02 |
| 15.30 | -6.78 | -7.19 | -7.51 | -8.02 | -8.34 | -8.80 | -9.07 | -9.35 | -9.61 | -9.86  | -10.00 |
| 15.53 | -7.05 | -7.41 | -7.80 | -8.28 | -8.66 | -9.02 | -9.31 | -9.67 | -9.90 | -10.13 | -10.33 |
| 15.77 | -6.88 | -7.31 | -7.70 | -8.11 | -8.35 | -8.88 | -9.15 | -9.53 | -9.70 | -9.88  | -10.08 |
| 16.04 | -6.87 | -7.16 | -7.65 | -8.14 | -8.41 | -8.98 | -9.26 | -9.49 | -9.76 | -10.04 | -10.18 |
| 16.32 | -6.84 | -7.19 | -7.64 | -8.12 | -8.44 | -8.87 | -9.05 | -9.36 | -9.63 | -9.85  | -10.06 |
| 16.63 | -6.82 | -7.32 | -7.77 | -8.15 | -8.44 | -8.94 | -9.24 | -9.52 | -9.77 | -9.92  | -10.24 |
| 16.96 | -6.85 | -7.29 | -7.74 | -8.16 | -8.49 | -8.96 | -9.14 | -9.47 | -9.71 | -9.93  | -9.97  |
| 17.31 | -6.83 | -7.20 | -7.68 | -8.06 | -8.40 | -8.86 | -9.24 | -9.46 | -9.77 | -9.99  | -10.03 |
| 17.70 | -6.87 | -7.32 | -7.73 | -8.12 | -8.53 | -8.89 | -9.17 | -9.51 | -9.74 | -10.02 | -10.10 |
| 18.11 | -6.91 | -7.19 | -7.64 | -8.00 | -8.32 | -8.72 | -9.09 | -9.33 | -9.61 | -9.86  | -10.06 |
| 18.56 | -6.80 | -7.20 | -7.52 | -8.04 | -8.39 | -8.75 | -9.06 | -9.37 | -9.57 | -9.83  | -9.97  |
| 19.04 | -6.80 | -7.26 | -7.63 | -8.05 | -8.35 | -8.79 | -9.05 | -9.24 | -9.69 | -9.81  | -9.97  |
| 19.56 | -6.63 | -7.07 | -7.50 | -7.86 | -8.27 | -8.64 | -9.01 | -9.33 | -9.52 | -9.76  | -9.98  |
| 20.12 | -6.89 | -7.30 | -7.75 | -8.10 | -8.47 | -8.89 | -9.17 | -9.58 | -9.72 | -9.98  | -10.20 |
| 20.72 | -6.73 | -7.17 | -7.64 | -8.00 | -8.41 | -8.81 | -9.18 | -9.41 | -9.65 | -9.91  | -10.05 |
| 21.37 | -6.81 | -7.15 | -7.52 | -7.94 | -8.36 | -8.67 | -9.11 | -9.24 | -9.57 | -9.87  | -10.05 |
| 22.08 | -6.84 | -7.20 | -7.62 | -7.95 | -8.33 | -8.81 | -9.12 | -9.42 | -9.73 | -10.06 | -10.16 |
| 22.84 | -6.74 | -7.30 | -7.69 | -8.09 | -8.39 | -8.75 | -9.12 | -9.42 | -9.73 | -9.98  | -10.12 |
| 23.65 | -6.70 | -7.20 | -7.58 | -8.02 | -8.33 | -8.77 | -9.14 | -9.38 | -9.63 | -9.78  | -9.94  |
| 24.54 | -6.78 | -7.20 | -7.59 | -8.00 | -8.35 | -8.78 | -9.11 | -9.35 | -9.54 | -9.77  | -10.00 |
| 25.49 | -6.89 | -7.30 | -7.57 | -8.12 | -8.49 | -8.91 | -9.13 | -9.46 | -9.68 | -9.89  | -10.17 |
| 26.51 | -6.83 | -7.21 | -7.58 | -7.95 | -8.35 | -8.79 | -9.05 | -9.28 | -9.47 | -9.68  | -9.83  |
| 27.62 | -6.89 | -7.22 | -7.67 | -8.07 | -8.46 | -8.91 | -9.07 | -9.41 | -9.68 | -9.93  | -10.02 |
| 28.81 | -6.80 | -7.13 | -7.52 | -7.87 | -8.26 | -8.74 | -9.07 | -9.31 | -9.53 | -9.85  | -10.01 |
| 30.10 | -6.85 | -7.20 | -7.58 | -8.02 | -8.34 | -8.67 | -9.00 | -9.28 | -9.52 | -9.69  | -9.89  |
| 31.49 | -6.77 | -7.06 | -7.48 | -7.84 | -8.20 | -8.64 | -8.96 | -9.22 | -9.40 | -9.68  | -9.83  |
| 32.98 | -6.70 | -7.10 | -7.54 | -7.84 | -8.20 | -8.70 | -8.90 | -9.18 | -9.42 | -9.64  | -9.78  |
| 34.60 | -6.73 | -7.19 | -7.64 | -7.96 | -8.22 | -8.72 | -9.02 | -9.31 | -9.49 | -9.69  | -9.87  |
| 36.34 | -6.83 | -7.24 | -7.62 | -8.02 | -8.40 | -8.78 | -9.07 | -9.34 | -9.59 | -9.76  | -9.82  |
| 38.21 | -6.69 | -7.06 | -7.48 | -7.84 | -8.20 | -8.61 | -8.83 | -9.02 | -9.25 | -9.51  | -9.60  |
| 40.24 | -6.65 | -7.16 | -7.64 | -7.99 | -8.24 | -8.67 | -8.96 | -9.20 | -9.46 | -9.71  | -9.89  |
| 42.42 | -6.78 | -7.08 | -7.53 | -7.82 | -8.14 | -8.62 | -8.90 | -9.15 | -9.32 | -9.56  | -9.65  |
| 44.78 | -6.62 | -7.09 | -7.42 | -7.87 | -8.12 | -8.61 | -8.85 | -9.13 | -9.30 | -9.59  | -9.61  |
| 47.32 | -6.70 | -7.18 | -7.51 | -7.84 | -8.20 | -8.61 | -8.82 | -9.05 | -9.25 | -9.51  | -9.59  |
| 50.06 | -6.74 | -7.05 | -7.42 | -7.84 | -8.17 | -8.67 | -8.81 | -9.12 | -9.38 | -9.60  | -9.72  |
| 53.01 | -6.73 | -7.11 | -7.61 | -7.94 | -8.26 | -8.62 | -8.94 | -9.28 | -9.48 | -9.70  | -9.73  |
| 56.20 | -6.73 | -7.20 | -7.50 | -7.84 | -8.33 | -8.70 | -8.95 | -9.23 | -9.42 | -9.71  | -9.78  |
| 59.64 | -6.75 | -7.12 | -7.47 | -7.86 | -8.15 | -8.57 | -8.85 | -9.08 | -9.30 | -9.63  | -9.72  |
| 63.34 | -6.59 | -6.96 | -7.35 | -7.73 | -8.13 | -8.50 | -8.78 | -9.02 | -9.16 | -9.46  | -9.48  |
| 67.34 | -6.58 | -7.05 | -7.41 | -7.70 | -8.09 | -8.48 | -8.78 | -9.07 | -9.25 | -9.45  | -9.54  |



|         |       |       |       |       |       |       |       |       |       |       |       |
|---------|-------|-------|-------|-------|-------|-------|-------|-------|-------|-------|-------|
| 71.65   | -6.84 | -7.15 | -7.49 | -7.85 | -8.19 | -8.58 | -8.86 | -9.14 | -9.30 | -9.53 | -9.72 |
| 76.30   | -6.62 | -7.08 | -7.38 | -7.82 | -8.13 | -8.52 | -8.79 | -9.10 | -9.23 | -9.52 | -9.74 |
| 81.32   | -6.74 | -7.10 | -7.55 | -7.93 | -8.21 | -8.60 | -8.94 | -9.15 | -9.36 | -9.70 | -9.72 |
| 86.73   | -6.70 | -7.12 | -7.42 | -7.86 | -8.18 | -8.62 | -8.81 | -9.09 | -9.38 | -9.59 | -9.76 |
| 92.56   | -6.65 | -6.96 | -7.38 | -7.70 | -7.96 | -8.56 | -8.74 | -9.02 | -9.27 | -9.49 | -9.62 |
| 98.85   | -6.70 | -6.90 | -7.44 | -7.91 | -8.19 | -8.44 | -8.78 | -9.06 | -9.22 | -9.43 | -9.58 |
| 105.64  | -6.65 | -6.97 | -7.35 | -7.75 | -8.15 | -8.41 | -8.69 | -8.93 | -9.17 | -9.42 | -9.56 |
| 112.96  | -6.70 | -6.98 | -7.46 | -7.85 | -8.00 | -8.46 | -8.83 | -9.11 | -9.38 | -9.47 | -9.63 |
| 120.85  | -6.69 | -7.06 | -7.31 | -7.68 | -7.97 | -8.37 | -8.64 | -8.92 | -9.13 | -9.38 | -9.55 |
| 129.36  | -6.75 | -7.07 | -7.53 | -7.88 | -8.09 | -8.53 | -8.82 | -9.11 | -9.33 | -9.61 | -9.76 |
| 138.55  | -6.58 | -6.89 | -7.28 | -7.68 | -8.08 | -8.36 | -8.71 | -8.98 | -9.12 | -9.42 | -9.55 |
| 148.45  | -6.59 | -6.95 | -7.34 | -7.78 | -8.07 | -8.43 | -8.72 | -9.00 | -9.29 | -9.46 | -9.51 |
| 159.13  | -6.57 | -6.95 | -7.36 | -7.69 | -8.06 | -8.42 | -8.72 | -8.95 | -9.14 | -9.30 | -9.55 |
| 170.65  | -6.73 | -7.01 | -7.44 | -7.71 | -8.03 | -8.45 | -8.77 | -9.00 | -9.18 | -9.48 | -9.57 |
| 183.07  | -6.54 | -6.93 | -7.32 | -7.59 | -7.90 | -8.34 | -8.62 | -8.85 | -9.10 | -9.33 | -9.40 |
| 196.47  | -6.55 | -6.89 | -7.30 | -7.57 | -7.97 | -8.39 | -8.61 | -8.86 | -9.09 | -9.27 | -9.42 |
| 210.91  | -6.59 | -6.99 | -7.20 | -7.62 | -7.93 | -8.27 | -8.57 | -8.82 | -9.02 | -9.22 | -9.31 |
| 226.50  | -6.37 | -6.79 | -7.17 | -7.40 | -7.73 | -8.20 | -8.45 | -8.69 | -8.90 | -9.12 | -9.30 |
| 243.31  | -6.40 | -6.76 | -7.05 | -7.37 | -7.69 | -8.06 | -8.36 | -8.58 | -8.85 | -9.05 | -9.24 |
| 261.43  | -6.48 | -6.87 | -7.20 | -7.54 | -7.83 | -8.27 | -8.53 | -8.78 | -8.97 | -9.20 | -9.30 |
| 280.98  | -6.33 | -6.73 | -7.10 | -7.43 | -7.71 | -8.15 | -8.40 | -8.59 | -8.82 | -9.08 | -9.12 |
| 302.07  | -6.23 | -6.59 | -6.90 | -7.28 | -7.57 | -7.93 | -8.22 | -8.42 | -8.73 | -8.91 | -9.06 |
| 324.81  | -6.39 | -6.76 | -7.05 | -7.41 | -7.70 | -7.99 | -8.30 | -8.57 | -8.69 | -8.97 | -9.12 |
| 349.33  | -6.19 | -6.59 | -6.91 | -7.23 | -7.49 | -7.79 | -8.13 | -8.27 | -8.54 | -8.86 | -8.99 |
| 375.79  | -6.28 | -6.61 | -6.86 | -7.28 | -7.46 | -7.92 | -8.24 | -8.48 | -8.69 | -8.87 | -9.02 |
| 404.31  | -6.16 | -6.50 | -6.92 | -7.15 | -7.47 | -7.82 | -8.15 | -8.31 | -8.51 | -8.76 | -8.93 |
| 435.08  | -6.23 | -6.53 | -6.95 | -7.31 | -7.58 | -7.98 | -8.16 | -8.46 | -8.72 | -8.85 | -9.01 |
| 468.27  | -6.10 | -6.48 | -6.78 | -7.11 | -7.47 | -7.77 | -7.97 | -8.32 | -8.49 | -8.73 | -8.84 |
| 504.06  | -6.07 | -6.44 | -6.76 | -7.04 | -7.46 | -7.81 | -8.02 | -8.22 | -8.48 | -8.65 | -8.79 |
| 542.66  | -6.02 | -6.42 | -6.79 | -7.04 | -7.40 | -7.75 | -7.82 | -8.21 | -8.41 | -8.65 | -8.74 |
| 584.29  | -6.03 | -6.37 | -6.58 | -6.97 | -7.30 | -7.75 | -7.92 | -8.23 | -8.39 | -8.59 | -8.71 |
| 629.18  | -5.93 | -6.27 | -6.60 | -6.91 | -7.14 | -7.55 | -7.67 | -8.04 | -8.22 | -8.41 | -8.60 |
| 677.61  | -5.96 | -6.42 | -6.67 | -6.96 | -7.29 | -7.60 | -7.95 | -8.24 | -8.31 | -8.58 | -8.74 |
| 729.83  | -5.83 | -6.21 | -6.44 | -6.79 | -7.12 | -7.39 | -7.61 | -7.93 | -8.07 | -8.28 | -8.40 |
| 786.16  | -5.93 | -6.21 | -6.53 | -6.81 | -7.04 | -7.39 | -7.64 | -7.91 | -8.13 | -8.31 | -8.54 |
| 846.90  | -5.90 | -6.32 | -6.50 | -6.79 | -7.08 | -7.49 | -7.73 | -7.92 | -8.13 | -8.46 | -8.57 |
| 912.42  | -5.88 | -6.27 | -6.53 | -6.75 | -7.08 | -7.48 | -7.56 | -7.81 | -8.08 | -8.34 | -8.46 |
| 983.08  | -5.90 | -6.16 | -6.46 | -6.78 | -7.07 | -7.42 | -7.64 | -7.87 | -8.10 | -8.33 | -8.54 |
| 1059.29 | -5.89 | -6.12 | -6.46 | -6.79 | -7.08 | -7.41 | -7.51 | -7.86 | -8.18 | -8.46 | -8.52 |
| 1141.48 | -5.91 | -6.23 | -6.46 | -6.79 | -7.06 | -7.42 | -7.69 | -7.82 | -8.12 | -8.30 | -8.45 |
| 1230.13 | -5.68 | -6.16 | -6.37 | -6.83 | -7.02 | -7.29 | -7.56 | -7.85 | -8.16 | -8.35 | -8.46 |
| 1325.73 | -5.96 | -6.18 | -6.61 | -6.76 | -7.10 | -7.49 | -7.70 | -7.95 | -8.20 | -8.46 | -8.61 |
| 1428.84 | -5.97 | -6.22 | -6.56 | -6.75 | -7.13 | -7.42 | -7.63 | -7.94 | -8.25 | -8.42 | -8.52 |
| 1540.05 | -6.07 | -6.33 | -6.67 | -6.97 | -7.27 | -7.55 | -7.93 | -8.14 | -8.31 | -8.61 | -8.77 |
| 1659.99 | -6.05 | -6.31 | -6.52 | -6.92 | -7.15 | -7.49 | -7.78 | -8.01 | -8.27 | -8.53 | -8.64 |
| 1789.34 | -6.12 | -6.33 | -6.67 | -7.00 | -7.22 | -7.48 | -7.77 | -8.02 | -8.22 | -8.49 | -8.72 |
| 1928.85 | -6.00 | -6.35 | -6.62 | -6.88 | -7.08 | -7.47 | -7.73 | -8.03 | -8.21 | -8.44 | -8.66 |
| 2079.31 | -6.06 | -6.35 | -6.66 | -6.85 | -7.21 | -7.53 | -7.80 | -8.14 | -8.42 | -8.59 | -8.85 |
| 2241.59 | -6.06 | -6.45 | -6.65 | -7.00 | -7.32 | -7.63 | -7.80 | -8.08 | -8.34 | -8.67 | -8.82 |
| 2416.60 | -5.99 | -6.40 | -6.66 | -6.85 | -7.15 | -7.57 | -7.82 | -8.10 | -8.42 | -8.79 | -8.96 |

|         |       |       |       |       |       |       |       |       |       |       |       |
|---------|-------|-------|-------|-------|-------|-------|-------|-------|-------|-------|-------|
| 2605.36 | -6.16 | -6.43 | -6.72 | -7.05 | -7.20 | -7.60 | -7.80 | -8.10 | -8.33 | -8.69 | -8.93 |
| 2808.94 | -6.13 | -6.41 | -6.74 | -6.97 | -7.16 | -7.51 | -7.81 | -8.04 | -8.32 | -8.73 | -8.91 |
| 3028.50 | -6.09 | -6.36 | -6.59 | -6.77 | -7.12 | -7.51 | -7.69 | -7.96 | -8.18 | -8.49 | -8.93 |
| 3265.30 | -6.09 | -6.30 | -6.69 | -6.87 | -7.15 | -7.45 | -7.64 | -7.97 | -8.27 | -8.60 | -8.85 |
| 3520.69 | -5.87 | -6.17 | -6.47 | -6.73 | -7.03 | -7.35 | -7.59 | -7.86 | -8.07 | -8.46 | -8.80 |
| 3796.13 | -5.80 | -6.04 | -6.31 | -6.56 | -6.93 | -7.15 | -7.42 | -7.85 | -8.06 | -8.40 | -8.64 |

| Wavelength (nm) \ Time (ps) | 490.74 | 492.16 | 493.58 | 495.01 | 496.43 | 497.86 | 499.28 | 500.70 | 502.13 | 503.55 | 504.98 |
|-----------------------------|--------|--------|--------|--------|--------|--------|--------|--------|--------|--------|--------|
| -3.78                       | 0.11   | 0.11   | 0.07   | 0.18   | 0.07   | 0.03   | 0.08   | 0.05   | 0.14   | 0.07   | 0.16   |
| -3.28                       | 0.11   | 0.10   | 0.03   | 0.06   | 0.12   | 0.04   | 0.05   | 0.09   | 0.08   | 0.12   | 0.10   |
| -2.78                       | -0.10  | -0.13  | -0.10  | -0.01  | -0.11  | -0.10  | -0.17  | -0.19  | -0.16  | -0.12  | -0.11  |
| -2.28                       | 0.08   | 0.00   | 0.15   | -0.02  | 0.06   | -0.03  | 0.04   | 0.07   | 0.02   | 0.02   | 0.01   |
| -1.78                       | -0.09  | -0.03  | 0.01   | -0.06  | -0.04  | 0.02   | 0.05   | -0.01  | 0.02   | -0.03  | -0.09  |
| -1.28                       | -0.09  | -0.03  | -0.10  | -0.06  | -0.14  | -0.04  | -0.01  | 0.02   | -0.04  | -0.02  | -0.10  |
| -0.78                       | 0.01   | 0.02   | -0.03  | -0.08  | 0.02   | 0.05   | 0.00   | 0.00   | -0.03  | -0.04  | 0.03   |
| -0.28                       | -0.02  | -0.04  | -0.03  | -0.01  | 0.03   | 0.03   | -0.04  | -0.03  | -0.02  | 0.01   | 0.00   |
| -0.18                       | 0.03   | 0.02   | 0.06   | 0.08   | 0.02   | 0.08   | -0.01  | 0.01   | 0.06   | 0.04   | 0.00   |
| -0.08                       | 0.11   | 0.11   | 0.07   | 0.15   | 0.11   | 0.11   | 0.04   | 0.05   | 0.06   | 0.09   | 0.05   |
| 0.02                        | 0.02   | -0.06  | -0.01  | 0.09   | -0.03  | -0.04  | -0.11  | 0.06   | -0.08  | -0.05  | -0.01  |
| 0.12                        | 0.01   | 0.10   | -0.02  | 0.08   | 0.05   | 0.10   | -0.05  | 0.03   | 0.09   | 0.02   | 0.01   |
| 0.22                        | -0.04  | -0.02  | -0.09  | 0.05   | -0.03  | 0.00   | 0.03   | -0.04  | -0.02  | 0.07   | 0.00   |
| 0.27                        | -0.03  | -0.08  | -0.07  | -0.06  | 0.06   | -0.02  | -0.08  | -0.12  | 0.01   | -0.02  | 0.01   |
| 0.32                        | 0.03   | 0.15   | 0.07   | 0.09   | 0.14   | 0.17   | 0.06   | 0.02   | 0.12   | 0.16   | 0.07   |
| 0.37                        | -0.05  | -0.04  | 0.00   | -0.10  | -0.04  | -0.02  | -0.10  | -0.07  | -0.09  | -0.08  | -0.07  |
| 0.42                        | -0.09  | -0.09  | -0.21  | -0.17  | -0.20  | -0.14  | -0.24  | -0.18  | -0.18  | -0.20  | -0.18  |
| 0.47                        | -0.06  | -0.11  | -0.02  | -0.05  | -0.10  | -0.02  | -0.12  | -0.09  | 0.01   | -0.05  | -0.09  |
| 0.52                        | -0.03  | -0.10  | -0.15  | -0.03  | -0.04  | -0.01  | -0.10  | -0.06  | 0.01   | -0.14  | -0.10  |
| 0.57                        | 0.10   | 0.08   | 0.15   | -0.03  | 0.00   | -0.04  | 0.06   | -0.06  | -0.03  | -0.05  | 0.00   |
| 0.62                        | 0.04   | 0.03   | 0.02   | 0.02   | -0.03  | 0.02   | 0.06   | 0.05   | 0.04   | 0.01   | 0.04   |
| 0.67                        | -0.17  | -0.14  | -0.11  | -0.01  | -0.14  | -0.08  | -0.12  | -0.07  | -0.10  | -0.16  | -0.11  |
| 0.72                        | -0.06  | -0.11  | -0.10  | -0.04  | -0.16  | -0.03  | -0.14  | -0.19  | -0.18  | -0.17  | -0.16  |
| 0.77                        | -0.04  | -0.05  | -0.12  | -0.01  | -0.04  | -0.02  | -0.16  | -0.05  | -0.01  | -0.13  | -0.12  |
| 0.82                        | 0.04   | 0.11   | 0.02   | 0.08   | 0.03   | 0.06   | 0.02   | 0.02   | 0.02   | -0.04  | -0.06  |
| 0.87                        | -0.01  | -0.02  | -0.07  | -0.01  | -0.07  | -0.14  | -0.13  | -0.04  | 0.00   | 0.00   | 0.01   |
| 0.92                        | 0.03   | 0.13   | 0.06   | 0.06   | 0.11   | 0.07   | 0.12   | 0.13   | 0.12   | 0.06   | 0.01   |
| 0.97                        | 0.00   | -0.07  | -0.03  | 0.01   | 0.07   | 0.11   | -0.03  | -0.10  | -0.01  | -0.06  | -0.11  |
| 1.02                        | 0.08   | 0.03   | -0.02  | 0.10   | 0.10   | -0.01  | -0.06  | 0.17   | 0.04   | -0.07  | -0.01  |
| 1.07                        | 0.03   | 0.01   | 0.07   | 0.10   | 0.10   | 0.17   | 0.17   | 0.01   | 0.08   | 0.05   | 0.01   |
| 1.12                        | -1.10  | -0.59  | -0.10  | 0.12   | 0.11   | -0.10  | -0.15  | -0.01  | -0.03  | -0.07  | -0.25  |
| 1.17                        | -41.88 | -41.40 | -38.53 | -33.48 | -27.02 | -19.80 | -12.89 | -6.80  | -2.21  | 0.56   | 1.69   |
| 1.22                        | 119.53 | 108.13 | 92.69  | 76.12  | 59.06  | 43.33  | 29.39  | 17.62  | 7.26   | -1.83  | -9.72  |
| 1.27                        | -85.28 | -77.01 | -64.80 | -48.66 | -30.85 | -11.54 | 8.14   | 27.77  | 45.87  | 61.73  | 74.81  |
| 1.32                        | -12.46 | -14.90 | -16.22 | -16.27 | -15.37 | -14.29 | -13.77 | -14.55 | -17.26 | -22.16 | -29.48 |
| 1.37                        | -13.82 | -14.45 | -15.40 | -16.39 | -17.44 | -18.10 | -18.45 | -18.09 | -17.21 | -16.04 | -15.01 |
| 1.42                        | -16.04 | -15.56 | -14.93 | -14.30 | -13.83 | -13.68 | -14.01 | -14.49 | -15.06 | -15.47 | -16.01 |
| 1.47                        | -14.08 | -14.97 | -15.71 | -16.05 | -16.09 | -15.60 | -15.20 | -14.56 | -14.22 | -14.19 | -14.53 |
| 1.52                        | -12.49 | -12.66 | -13.07 | -13.94 | -14.87 | -15.74 | -16.39 | -16.73 | -16.61 | -16.29 | -15.73 |

|      |        |        |        |        |        |        |        |        |        |        |        |
|------|--------|--------|--------|--------|--------|--------|--------|--------|--------|--------|--------|
| 1.57 | -15.47 | -15.46 | -15.14 | -14.69 | -14.13 | -13.92 | -14.02 | -14.33 | -14.78 | -15.43 | -15.76 |
| 1.62 | -13.39 | -14.66 | -15.48 | -16.01 | -16.02 | -15.63 | -14.94 | -14.09 | -13.30 | -12.91 | -12.65 |
| 1.67 | -13.06 | -12.91 | -13.07 | -13.35 | -13.78 | -14.48 | -15.03 | -15.39 | -15.32 | -15.21 | -14.76 |
| 1.72 | -14.32 | -14.82 | -14.91 | -14.54 | -14.10 | -13.73 | -13.25 | -13.10 | -13.10 | -13.54 | -13.98 |
| 1.77 | -12.33 | -12.89 | -13.67 | -14.38 | -14.96 | -15.35 | -15.43 | -15.29 | -14.75 | -14.16 | -13.56 |
| 1.82 | -13.74 | -13.43 | -13.13 | -12.91 | -12.90 | -12.99 | -13.36 | -13.70 | -14.05 | -14.18 | -14.15 |
| 1.87 | -13.99 | -14.42 | -14.65 | -14.53 | -14.16 | -13.74 | -13.14 | -12.82 | -12.60 | -12.68 | -12.87 |
| 1.92 | -12.13 | -12.13 | -12.47 | -12.92 | -13.53 | -14.03 | -14.50 | -14.62 | -14.49 | -14.14 | -13.62 |
| 1.97 | -13.91 | -13.92 | -13.65 | -13.32 | -12.93 | -12.72 | -12.72 | -12.79 | -13.05 | -13.34 | -13.62 |
| 2.02 | -12.36 | -12.85 | -13.40 | -13.79 | -14.00 | -13.88 | -13.73 | -13.34 | -12.91 | -12.39 | -12.12 |
| 2.07 | -12.23 | -12.23 | -12.41 | -12.82 | -13.09 | -13.50 | -13.70 | -13.80 | -13.72 | -13.36 | -12.87 |
| 2.12 | -13.31 | -13.59 | -13.69 | -13.48 | -13.16 | -12.84 | -12.67 | -12.48 | -12.51 | -12.62 | -12.67 |
| 2.17 | -12.13 | -12.76 | -13.23 | -13.52 | -13.73 | -13.76 | -13.51 | -13.12 | -12.70 | -12.13 | -11.81 |
| 2.22 | -12.87 | -12.83 | -12.73 | -12.61 | -12.59 | -12.59 | -12.79 | -12.90 | -13.04 | -13.10 | -13.14 |
| 2.27 | -12.96 | -13.41 | -13.56 | -13.69 | -13.45 | -13.00 | -12.68 | -12.32 | -12.16 | -11.95 | -11.98 |
| 2.32 | -11.77 | -12.05 | -12.36 | -12.62 | -12.92 | -13.31 | -13.42 | -13.30 | -12.92 | -12.55 | -12.18 |
| 2.37 | -13.06 | -13.12 | -12.95 | -12.70 | -12.43 | -12.41 | -12.33 | -12.24 | -12.34 | -12.48 | -12.53 |
| 2.42 | -12.56 | -13.16 | -13.30 | -13.43 | -13.36 | -13.05 | -12.78 | -12.29 | -12.03 | -11.91 | -11.84 |
| 2.47 | -12.02 | -12.23 | -12.35 | -12.59 | -12.78 | -13.00 | -13.10 | -13.08 | -12.93 | -12.57 | -12.23 |
| 2.52 | -12.97 | -13.11 | -13.16 | -13.05 | -12.80 | -12.48 | -12.37 | -12.34 | -12.09 | -12.21 | -12.29 |
| 2.57 | -12.16 | -12.64 | -12.95 | -13.16 | -13.25 | -13.12 | -12.93 | -12.67 | -12.24 | -11.90 | -11.67 |
| 2.62 | -12.34 | -12.36 | -12.32 | -12.38 | -12.41 | -12.55 | -12.68 | -12.83 | -12.72 | -12.60 | -12.29 |
| 2.67 | -12.54 | -12.79 | -12.83 | -12.65 | -12.53 | -12.26 | -12.05 | -11.87 | -11.80 | -11.69 | -11.69 |
| 2.72 | -11.90 | -12.10 | -12.32 | -12.65 | -12.84 | -12.89 | -12.93 | -12.69 | -12.35 | -11.93 | -11.62 |
| 2.77 | -12.56 | -12.47 | -12.41 | -12.29 | -12.19 | -12.14 | -12.05 | -12.16 | -12.04 | -12.04 | -11.95 |
| 2.82 | -12.11 | -12.55 | -12.70 | -12.69 | -12.63 | -12.41 | -12.12 | -11.95 | -11.67 | -11.48 | -11.34 |
| 2.87 | -11.82 | -12.11 | -12.20 | -12.25 | -12.29 | -12.41 | -12.39 | -12.34 | -12.06 | -11.87 | -11.59 |
| 2.92 | -12.55 | -12.57 | -12.61 | -12.51 | -12.22 | -12.03 | -11.95 | -11.78 | -11.70 | -11.77 | -11.59 |
| 2.97 | -11.73 | -12.06 | -12.35 | -12.42 | -12.47 | -12.46 | -12.26 | -11.96 | -11.61 | -11.34 | -11.10 |
| 3.02 | -11.86 | -11.92 | -11.93 | -11.98 | -12.07 | -12.08 | -12.08 | -12.06 | -12.07 | -11.76 | -11.50 |
| 3.07 | -12.30 | -12.43 | -12.65 | -12.53 | -12.34 | -12.18 | -11.97 | -11.71 | -11.52 | -11.40 | -11.31 |
| 3.12 | -11.59 | -11.83 | -12.13 | -12.21 | -12.33 | -12.30 | -12.18 | -11.86 | -11.53 | -11.28 | -11.01 |
| 3.17 | -12.02 | -12.18 | -12.22 | -12.06 | -12.06 | -11.86 | -11.81 | -11.83 | -11.72 | -11.59 | -11.42 |
| 3.22 | -11.96 | -12.31 | -12.49 | -12.38 | -12.44 | -12.29 | -12.06 | -11.85 | -11.51 | -11.26 | -11.14 |
| 3.42 | -11.82 | -11.89 | -11.96 | -12.05 | -12.06 | -12.04 | -12.05 | -11.85 | -11.75 | -11.63 | -11.26 |
| 3.62 | -12.02 | -12.24 | -12.41 | -12.32 | -12.10 | -12.05 | -11.78 | -11.63 | -11.39 | -11.25 | -11.12 |
| 3.82 | -11.72 | -11.88 | -11.89 | -12.01 | -11.95 | -11.86 | -11.85 | -11.80 | -11.60 | -11.45 | -11.14 |
| 4.02 | -11.83 | -12.06 | -12.15 | -12.14 | -12.07 | -11.81 | -11.73 | -11.44 | -11.25 | -11.05 | -10.83 |
| 4.22 | -11.66 | -11.71 | -11.78 | -11.86 | -11.81 | -11.85 | -11.78 | -11.48 | -11.35 | -11.14 | -10.78 |
| 4.42 | -11.67 | -11.73 | -11.82 | -11.79 | -11.72 | -11.55 | -11.45 | -11.34 | -11.02 | -10.91 | -10.64 |
| 4.62 | -11.57 | -11.70 | -11.82 | -11.82 | -11.79 | -11.71 | -11.56 | -11.44 | -11.08 | -11.00 | -10.65 |
| 4.82 | -11.66 | -11.76 | -11.88 | -11.83 | -11.74 | -11.61 | -11.44 | -11.28 | -10.97 | -10.80 | -10.61 |
| 5.02 | -11.44 | -11.62 | -11.74 | -11.68 | -11.60 | -11.53 | -11.51 | -11.28 | -10.97 | -10.77 | -10.53 |
| 5.22 | -11.56 | -11.73 | -11.92 | -11.76 | -11.59 | -11.61 | -11.36 | -11.21 | -10.95 | -10.80 | -10.55 |
| 5.42 | -11.45 | -11.70 | -11.74 | -11.67 | -11.61 | -11.59 | -11.40 | -11.20 | -10.94 | -10.64 | -10.49 |
| 5.62 | -11.41 | -11.53 | -11.43 | -11.36 | -11.37 | -11.25 | -11.16 | -10.91 | -10.75 | -10.47 | -10.23 |
| 5.82 | -11.34 | -11.50 | -11.48 | -11.49 | -11.45 | -11.23 | -11.19 | -10.93 | -10.74 | -10.45 | -10.24 |
| 6.02 | -11.21 | -11.32 | -11.41 | -11.39 | -11.29 | -11.12 | -10.98 | -10.69 | -10.49 | -10.30 | -10.18 |
| 6.22 | -11.24 | -11.43 | -11.42 | -11.41 | -11.34 | -11.14 | -11.14 | -10.82 | -10.57 | -10.42 | -10.16 |
| 6.42 | -11.29 | -11.38 | -11.43 | -11.36 | -11.30 | -11.17 | -10.96 | -10.76 | -10.53 | -10.29 | -10.05 |

|       |        |        |        |        |        |        |        |        |        |        |        |
|-------|--------|--------|--------|--------|--------|--------|--------|--------|--------|--------|--------|
| 6.62  | -11.24 | -11.34 | -11.45 | -11.37 | -11.24 | -11.16 | -10.93 | -10.72 | -10.48 | -10.26 | -10.01 |
| 6.82  | -11.16 | -11.17 | -11.24 | -11.26 | -11.11 | -10.90 | -10.80 | -10.63 | -10.38 | -10.14 | -9.95  |
| 7.02  | -11.10 | -11.22 | -11.16 | -11.23 | -11.05 | -11.05 | -10.82 | -10.60 | -10.30 | -10.11 | -9.85  |
| 7.22  | -11.00 | -11.20 | -11.19 | -11.16 | -11.01 | -10.90 | -10.81 | -10.56 | -10.30 | -10.21 | -9.79  |
| 7.42  | -11.18 | -11.26 | -11.29 | -11.20 | -11.18 | -11.03 | -10.84 | -10.59 | -10.31 | -10.14 | -9.84  |
| 7.62  | -10.92 | -11.06 | -11.13 | -11.06 | -11.00 | -10.86 | -10.64 | -10.48 | -10.23 | -10.04 | -9.67  |
| 7.82  | -10.93 | -10.97 | -10.98 | -10.89 | -10.84 | -10.69 | -10.57 | -10.31 | -10.09 | -9.82  | -9.65  |
| 8.02  | -10.99 | -11.07 | -11.05 | -11.03 | -10.90 | -10.83 | -10.63 | -10.44 | -10.15 | -9.90  | -9.58  |
| 8.22  | -10.63 | -10.80 | -10.80 | -10.81 | -10.71 | -10.54 | -10.40 | -10.19 | -9.98  | -9.66  | -9.40  |
| 8.42  | -10.88 | -10.94 | -10.95 | -10.91 | -10.87 | -10.60 | -10.58 | -10.33 | -10.03 | -9.76  | -9.53  |
| 8.62  | -10.74 | -10.75 | -10.83 | -10.75 | -10.49 | -10.46 | -10.34 | -10.04 | -9.84  | -9.53  | -9.33  |
| 8.82  | -10.83 | -10.90 | -11.00 | -10.92 | -10.79 | -10.59 | -10.52 | -10.22 | -9.94  | -9.80  | -9.50  |
| 9.02  | -10.69 | -10.74 | -10.78 | -10.69 | -10.65 | -10.55 | -10.29 | -10.02 | -9.79  | -9.61  | -9.31  |
| 9.22  | -10.75 | -10.87 | -11.00 | -10.89 | -10.78 | -10.61 | -10.42 | -10.22 | -9.93  | -9.66  | -9.48  |
| 9.42  | -10.69 | -10.77 | -10.79 | -10.72 | -10.59 | -10.46 | -10.36 | -10.17 | -9.82  | -9.56  | -9.25  |
| 9.62  | -10.68 | -10.79 | -10.73 | -10.75 | -10.60 | -10.41 | -10.28 | -10.04 | -9.81  | -9.55  | -9.24  |
| 9.82  | -10.63 | -10.65 | -10.75 | -10.62 | -10.60 | -10.35 | -10.30 | -9.99  | -9.69  | -9.56  | -9.22  |
| 10.02 | -10.70 | -10.78 | -10.81 | -10.75 | -10.59 | -10.43 | -10.21 | -9.94  | -9.76  | -9.50  | -9.18  |
| 10.22 | -10.62 | -10.67 | -10.69 | -10.67 | -10.62 | -10.30 | -10.26 | -9.97  | -9.65  | -9.49  | -9.24  |
| 10.42 | -10.72 | -10.77 | -10.80 | -10.71 | -10.56 | -10.42 | -10.28 | -9.97  | -9.80  | -9.47  | -9.27  |
| 10.62 | -10.59 | -10.70 | -10.72 | -10.72 | -10.59 | -10.37 | -10.22 | -10.01 | -9.71  | -9.52  | -9.20  |
| 10.82 | -10.55 | -10.67 | -10.67 | -10.48 | -10.45 | -10.38 | -10.16 | -9.91  | -9.73  | -9.38  | -9.10  |
| 11.02 | -10.48 | -10.56 | -10.55 | -10.52 | -10.39 | -10.24 | -10.13 | -9.84  | -9.57  | -9.33  | -9.13  |
| 11.22 | -10.50 | -10.57 | -10.51 | -10.40 | -10.41 | -10.16 | -10.06 | -9.69  | -9.49  | -9.23  | -8.96  |
| 11.42 | -10.32 | -10.44 | -10.38 | -10.37 | -10.23 | -10.08 | -9.96  | -9.68  | -9.37  | -9.15  | -8.85  |
| 11.62 | -10.44 | -10.56 | -10.53 | -10.52 | -10.34 | -10.18 | -10.02 | -9.83  | -9.48  | -9.27  | -9.04  |
| 11.82 | -10.56 | -10.56 | -10.56 | -10.54 | -10.46 | -10.21 | -10.09 | -9.80  | -9.54  | -9.28  | -9.01  |
| 12.02 | -10.29 | -10.43 | -10.45 | -10.38 | -10.24 | -10.13 | -9.90  | -9.70  | -9.37  | -9.11  | -8.89  |
| 12.22 | -10.56 | -10.70 | -10.65 | -10.62 | -10.50 | -10.25 | -10.17 | -9.82  | -9.57  | -9.27  | -8.94  |
| 12.42 | -10.28 | -10.49 | -10.30 | -10.26 | -10.18 | -10.02 | -9.83  | -9.61  | -9.36  | -9.10  | -8.79  |
| 12.62 | -10.29 | -10.40 | -10.39 | -10.34 | -10.18 | -10.02 | -9.86  | -9.63  | -9.38  | -9.04  | -8.83  |
| 12.82 | -10.06 | -10.04 | -10.09 | -9.98  | -9.92  | -9.80  | -9.52  | -9.35  | -9.05  | -8.86  | -8.48  |
| 13.02 | -10.39 | -10.49 | -10.45 | -10.34 | -10.25 | -10.06 | -9.87  | -9.61  | -9.39  | -9.18  | -8.82  |
| 13.22 | -10.19 | -10.35 | -10.23 | -10.29 | -10.14 | -9.98  | -9.88  | -9.62  | -9.29  | -9.08  | -8.75  |
| 13.42 | -10.40 | -10.38 | -10.61 | -10.38 | -10.32 | -10.12 | -9.90  | -9.68  | -9.41  | -9.08  | -8.87  |
| 13.50 | -10.16 | -10.17 | -10.30 | -10.17 | -9.95  | -9.77  | -9.60  | -9.43  | -9.06  | -8.89  | -8.62  |
| 13.59 | -10.32 | -10.42 | -10.42 | -10.28 | -10.23 | -10.02 | -9.86  | -9.64  | -9.26  | -9.10  | -8.77  |
| 13.68 | -10.26 | -10.30 | -10.28 | -10.20 | -10.13 | -9.91  | -9.75  | -9.49  | -9.24  | -8.96  | -8.75  |
| 13.78 | -10.22 | -10.36 | -10.38 | -10.33 | -10.11 | -9.96  | -9.82  | -9.47  | -9.39  | -9.00  | -8.76  |
| 13.88 | -10.29 | -10.40 | -10.39 | -10.19 | -10.19 | -10.02 | -9.87  | -9.54  | -9.32  | -9.09  | -8.78  |
| 14.00 | -10.41 | -10.44 | -10.52 | -10.50 | -10.27 | -10.15 | -9.91  | -9.66  | -9.40  | -9.11  | -8.76  |
| 14.12 | -10.33 | -10.39 | -10.41 | -10.25 | -10.16 | -9.95  | -9.84  | -9.48  | -9.33  | -9.02  | -8.66  |
| 14.25 | -10.19 | -10.33 | -10.25 | -10.26 | -10.11 | -9.94  | -9.80  | -9.46  | -9.21  | -9.04  | -8.73  |
| 14.40 | -10.46 | -10.61 | -10.65 | -10.41 | -10.34 | -10.24 | -10.06 | -9.80  | -9.43  | -9.17  | -8.97  |
| 14.55 | -10.26 | -10.33 | -10.36 | -10.25 | -10.12 | -9.97  | -9.74  | -9.48  | -9.22  | -9.01  | -8.70  |
| 14.72 | -10.20 | -10.21 | -10.22 | -10.22 | -10.07 | -9.84  | -9.67  | -9.45  | -9.13  | -8.88  | -8.61  |
| 14.90 | -10.04 | -10.18 | -10.04 | -9.99  | -9.93  | -9.69  | -9.52  | -9.29  | -9.00  | -8.76  | -8.50  |
| 15.09 | -10.14 | -10.18 | -10.16 | -10.04 | -9.94  | -9.76  | -9.59  | -9.31  | -9.02  | -8.85  | -8.66  |
| 15.30 | -10.12 | -10.11 | -10.09 | -10.06 | -9.95  | -9.79  | -9.69  | -9.29  | -9.02  | -8.84  | -8.53  |
| 15.53 | -10.39 | -10.44 | -10.44 | -10.28 | -10.25 | -10.01 | -9.92  | -9.55  | -9.39  | -9.15  | -8.89  |

|        |        |        |        |        |        |        |       |       |       |       |       |
|--------|--------|--------|--------|--------|--------|--------|-------|-------|-------|-------|-------|
| 15.77  | -10.08 | -10.17 | -10.14 | -10.12 | -9.94  | -9.85  | -9.69 | -9.36 | -9.14 | -8.81 | -8.51 |
| 16.04  | -10.34 | -10.36 | -10.30 | -10.23 | -10.16 | -9.99  | -9.81 | -9.56 | -9.27 | -9.01 | -8.79 |
| 16.32  | -10.09 | -10.15 | -10.08 | -10.08 | -9.94  | -9.74  | -9.59 | -9.31 | -9.06 | -8.76 | -8.53 |
| 16.63  | -10.30 | -10.45 | -10.44 | -10.24 | -10.22 | -9.84  | -9.74 | -9.52 | -9.27 | -8.92 | -8.67 |
| 16.96  | -10.17 | -10.18 | -10.21 | -10.02 | -9.99  | -9.76  | -9.54 | -9.40 | -9.09 | -8.75 | -8.48 |
| 17.31  | -10.12 | -10.16 | -10.25 | -10.08 | -9.97  | -9.85  | -9.74 | -9.39 | -9.15 | -8.83 | -8.54 |
| 17.70  | -10.28 | -10.36 | -10.24 | -10.16 | -10.05 | -9.92  | -9.71 | -9.45 | -9.18 | -8.89 | -8.64 |
| 18.11  | -10.00 | -10.06 | -10.09 | -9.91  | -9.83  | -9.69  | -9.49 | -9.27 | -8.90 | -8.74 | -8.40 |
| 18.56  | -10.06 | -10.10 | -9.99  | -10.01 | -9.83  | -9.75  | -9.43 | -9.22 | -8.92 | -8.70 | -8.36 |
| 19.04  | -10.15 | -10.20 | -10.21 | -10.03 | -9.82  | -9.76  | -9.55 | -9.25 | -9.05 | -8.75 | -8.43 |
| 19.56  | -10.09 | -10.09 | -10.07 | -10.07 | -9.97  | -9.71  | -9.53 | -9.30 | -9.07 | -8.76 | -8.46 |
| 20.12  | -10.17 | -10.23 | -10.26 | -10.22 | -10.06 | -9.84  | -9.63 | -9.46 | -9.11 | -8.82 | -8.53 |
| 20.72  | -10.20 | -10.19 | -10.26 | -10.08 | -10.04 | -9.89  | -9.64 | -9.38 | -9.08 | -8.93 | -8.57 |
| 21.37  | -10.11 | -10.26 | -10.20 | -9.99  | -9.98  | -9.79  | -9.54 | -9.27 | -8.99 | -8.69 | -8.43 |
| 22.08  | -10.34 | -10.44 | -10.43 | -10.28 | -10.16 | -10.02 | -9.70 | -9.49 | -9.19 | -8.92 | -8.61 |
| 22.84  | -10.21 | -10.11 | -10.29 | -10.12 | -10.03 | -9.77  | -9.68 | -9.44 | -9.07 | -8.87 | -8.61 |
| 23.65  | -10.10 | -10.08 | -10.18 | -10.01 | -9.87  | -9.69  | -9.58 | -9.28 | -8.96 | -8.79 | -8.44 |
| 24.54  | -10.08 | -9.97  | -10.04 | -9.89  | -9.81  | -9.62  | -9.51 | -9.17 | -9.03 | -8.64 | -8.40 |
| 25.49  | -10.18 | -10.29 | -10.20 | -10.14 | -10.07 | -9.74  | -9.62 | -9.36 | -9.00 | -8.78 | -8.48 |
| 26.51  | -9.91  | -10.01 | -10.01 | -9.86  | -9.72  | -9.52  | -9.36 | -9.06 | -8.75 | -8.52 | -8.31 |
| 27.62  | -10.04 | -10.18 | -10.18 | -10.05 | -9.92  | -9.76  | -9.58 | -9.24 | -8.98 | -8.80 | -8.43 |
| 28.81  | -10.05 | -10.03 | -10.06 | -9.97  | -9.89  | -9.68  | -9.46 | -9.21 | -8.83 | -8.63 | -8.39 |
| 30.10  | -9.97  | -9.94  | -10.02 | -9.83  | -9.66  | -9.52  | -9.43 | -9.03 | -8.82 | -8.53 | -8.26 |
| 31.49  | -9.86  | -9.95  | -9.90  | -9.82  | -9.62  | -9.55  | -9.30 | -9.03 | -8.82 | -8.49 | -8.23 |
| 32.98  | -9.85  | -9.92  | -9.91  | -9.74  | -9.63  | -9.45  | -9.37 | -9.06 | -8.78 | -8.49 | -8.29 |
| 34.60  | -9.98  | -9.97  | -9.97  | -9.84  | -9.65  | -9.61  | -9.37 | -9.05 | -8.76 | -8.48 | -8.12 |
| 36.34  | -9.94  | -10.06 | -9.94  | -9.92  | -9.70  | -9.64  | -9.39 | -9.17 | -8.80 | -8.56 | -8.28 |
| 38.21  | -9.72  | -9.74  | -9.73  | -9.68  | -9.60  | -9.39  | -9.13 | -8.86 | -8.63 | -8.26 | -7.94 |
| 40.24  | -9.96  | -9.99  | -9.95  | -9.93  | -9.72  | -9.58  | -9.31 | -9.12 | -8.77 | -8.57 | -8.25 |
| 42.42  | -9.68  | -9.75  | -9.68  | -9.54  | -9.55  | -9.29  | -9.13 | -8.81 | -8.54 | -8.20 | -7.99 |
| 44.78  | -9.83  | -9.89  | -9.86  | -9.73  | -9.53  | -9.44  | -9.32 | -8.99 | -8.73 | -8.44 | -8.05 |
| 47.32  | -9.69  | -9.74  | -9.69  | -9.51  | -9.51  | -9.17  | -9.05 | -8.84 | -8.55 | -8.20 | -8.00 |
| 50.06  | -9.88  | -9.89  | -9.84  | -9.85  | -9.57  | -9.44  | -9.25 | -8.94 | -8.65 | -8.41 | -8.12 |
| 53.01  | -9.91  | -9.85  | -9.87  | -9.75  | -9.63  | -9.43  | -9.26 | -8.94 | -8.67 | -8.43 | -8.11 |
| 56.20  | -9.89  | -9.81  | -9.82  | -9.73  | -9.58  | -9.46  | -9.27 | -8.96 | -8.66 | -8.37 | -8.15 |
| 59.64  | -9.80  | -9.89  | -9.78  | -9.74  | -9.57  | -9.45  | -9.27 | -9.02 | -8.71 | -8.41 | -8.13 |
| 63.34  | -9.61  | -9.66  | -9.66  | -9.56  | -9.36  | -9.33  | -8.96 | -8.72 | -8.44 | -8.15 | -7.88 |
| 67.34  | -9.67  | -9.76  | -9.67  | -9.57  | -9.41  | -9.21  | -9.10 | -8.85 | -8.52 | -8.22 | -7.93 |
| 71.65  | -9.73  | -9.83  | -9.73  | -9.64  | -9.62  | -9.29  | -9.21 | -8.98 | -8.63 | -8.30 | -8.06 |
| 76.30  | -9.84  | -9.90  | -9.91  | -9.76  | -9.65  | -9.54  | -9.27 | -8.99 | -8.77 | -8.44 | -8.16 |
| 81.32  | -9.78  | -9.78  | -9.80  | -9.77  | -9.69  | -9.43  | -9.34 | -9.00 | -8.72 | -8.37 | -8.10 |
| 86.73  | -9.83  | -9.86  | -9.79  | -9.72  | -9.63  | -9.40  | -9.18 | -8.96 | -8.64 | -8.41 | -8.14 |
| 92.56  | -9.71  | -9.75  | -9.76  | -9.64  | -9.48  | -9.25  | -9.07 | -8.89 | -8.60 | -8.27 | -7.93 |
| 98.85  | -9.68  | -9.63  | -9.71  | -9.58  | -9.46  | -9.19  | -9.04 | -8.84 | -8.54 | -8.23 | -7.99 |
| 105.64 | -9.70  | -9.79  | -9.68  | -9.59  | -9.46  | -9.35  | -9.11 | -8.88 | -8.59 | -8.36 | -7.97 |
| 112.96 | -9.73  | -9.79  | -9.76  | -9.66  | -9.60  | -9.41  | -9.32 | -9.04 | -8.62 | -8.35 | -8.04 |
| 120.85 | -9.48  | -9.56  | -9.51  | -9.44  | -9.33  | -9.12  | -8.92 | -8.69 | -8.28 | -8.13 | -7.82 |
| 129.36 | -9.80  | -9.87  | -9.89  | -9.79  | -9.72  | -9.57  | -9.30 | -9.07 | -8.78 | -8.43 | -8.17 |
| 138.55 | -9.68  | -9.68  | -9.63  | -9.48  | -9.41  | -9.23  | -9.17 | -8.73 | -8.45 | -8.15 | -7.98 |
| 148.45 | -9.67  | -9.73  | -9.76  | -9.57  | -9.44  | -9.20  | -9.08 | -8.85 | -8.45 | -8.24 | -7.97 |

|         |       |       |       |       |       |       |       |       |       |       |       |
|---------|-------|-------|-------|-------|-------|-------|-------|-------|-------|-------|-------|
| 159.13  | -9.46 | -9.63 | -9.72 | -9.54 | -9.50 | -9.20 | -9.01 | -8.82 | -8.46 | -8.19 | -7.91 |
| 170.65  | -9.64 | -9.69 | -9.66 | -9.59 | -9.45 | -9.25 | -9.13 | -8.81 | -8.51 | -8.15 | -7.87 |
| 183.07  | -9.42 | -9.61 | -9.51 | -9.41 | -9.35 | -9.19 | -8.92 | -8.66 | -8.27 | -8.06 | -7.75 |
| 196.47  | -9.57 | -9.53 | -9.57 | -9.41 | -9.40 | -9.17 | -9.00 | -8.79 | -8.41 | -8.09 | -7.84 |
| 210.91  | -9.31 | -9.44 | -9.43 | -9.29 | -9.11 | -8.93 | -8.91 | -8.63 | -8.25 | -8.03 | -7.73 |
| 226.50  | -9.33 | -9.42 | -9.34 | -9.28 | -9.19 | -9.06 | -8.76 | -8.56 | -8.31 | -7.97 | -7.62 |
| 243.31  | -9.25 | -9.33 | -9.30 | -9.12 | -9.12 | -8.97 | -8.71 | -8.48 | -8.24 | -7.94 | -7.67 |
| 261.43  | -9.48 | -9.52 | -9.39 | -9.41 | -9.25 | -9.11 | -8.99 | -8.64 | -8.35 | -8.09 | -7.86 |
| 280.98  | -9.28 | -9.29 | -9.30 | -9.19 | -9.08 | -8.94 | -8.78 | -8.56 | -8.23 | -7.93 | -7.63 |
| 302.07  | -9.14 | -9.19 | -9.18 | -9.04 | -8.93 | -8.77 | -8.66 | -8.40 | -8.04 | -7.85 | -7.56 |
| 324.81  | -9.17 | -9.26 | -9.16 | -9.08 | -9.00 | -8.83 | -8.70 | -8.37 | -8.11 | -7.77 | -7.55 |
| 349.33  | -9.05 | -9.06 | -9.14 | -9.04 | -8.92 | -8.82 | -8.61 | -8.37 | -7.98 | -7.71 | -7.38 |
| 375.79  | -9.13 | -9.22 | -9.17 | -9.10 | -8.88 | -8.77 | -8.70 | -8.30 | -8.04 | -7.81 | -7.49 |
| 404.31  | -8.89 | -8.97 | -8.96 | -8.88 | -8.71 | -8.59 | -8.35 | -8.17 | -7.92 | -7.63 | -7.29 |
| 435.08  | -9.15 | -9.14 | -9.13 | -8.99 | -9.00 | -8.80 | -8.70 | -8.39 | -8.10 | -7.77 | -7.51 |
| 468.27  | -8.91 | -8.95 | -9.07 | -8.96 | -8.77 | -8.64 | -8.49 | -8.29 | -7.95 | -7.60 | -7.33 |
| 504.06  | -9.03 | -9.00 | -8.91 | -8.90 | -8.74 | -8.68 | -8.42 | -8.15 | -7.83 | -7.65 | -7.26 |
| 542.66  | -8.80 | -8.95 | -8.92 | -8.94 | -8.72 | -8.57 | -8.42 | -8.14 | -7.79 | -7.56 | -7.24 |
| 584.29  | -8.82 | -8.89 | -8.92 | -8.91 | -8.79 | -8.57 | -8.46 | -8.07 | -7.87 | -7.54 | -7.30 |
| 629.18  | -8.66 | -8.74 | -8.68 | -8.67 | -8.56 | -8.44 | -8.22 | -7.99 | -7.72 | -7.50 | -7.07 |
| 677.61  | -8.84 | -8.91 | -8.98 | -8.76 | -8.75 | -8.59 | -8.41 | -8.11 | -7.78 | -7.52 | -7.14 |
| 729.83  | -8.48 | -8.60 | -8.63 | -8.55 | -8.40 | -8.24 | -8.06 | -7.90 | -7.54 | -7.22 | -6.98 |
| 786.16  | -8.60 | -8.63 | -8.71 | -8.62 | -8.59 | -8.40 | -8.19 | -7.97 | -7.72 | -7.43 | -7.15 |
| 846.90  | -8.58 | -8.60 | -8.65 | -8.65 | -8.49 | -8.41 | -8.25 | -7.91 | -7.60 | -7.31 | -7.06 |
| 912.42  | -8.52 | -8.58 | -8.68 | -8.48 | -8.41 | -8.23 | -8.14 | -7.91 | -7.60 | -7.18 | -7.11 |
| 983.08  | -8.53 | -8.68 | -8.51 | -8.50 | -8.43 | -8.26 | -8.07 | -7.87 | -7.46 | -7.27 | -7.00 |
| 1059.29 | -8.67 | -8.83 | -8.83 | -8.75 | -8.62 | -8.42 | -8.39 | -8.07 | -7.70 | -7.47 | -7.13 |
| 1141.48 | -8.54 | -8.63 | -8.64 | -8.52 | -8.48 | -8.27 | -8.16 | -7.81 | -7.54 | -7.26 | -6.89 |
| 1230.13 | -8.58 | -8.67 | -8.57 | -8.57 | -8.43 | -8.37 | -8.15 | -7.88 | -7.56 | -7.32 | -7.00 |
| 1325.73 | -8.79 | -8.72 | -8.81 | -8.64 | -8.58 | -8.37 | -8.28 | -8.07 | -7.66 | -7.37 | -7.17 |
| 1428.84 | -8.73 | -8.84 | -8.84 | -8.74 | -8.70 | -8.50 | -8.32 | -8.07 | -7.76 | -7.45 | -7.13 |
| 1540.05 | -8.93 | -8.88 | -8.93 | -8.78 | -8.79 | -8.58 | -8.47 | -8.14 | -7.87 | -7.55 | -7.23 |
| 1659.99 | -8.88 | -8.99 | -8.89 | -8.93 | -8.83 | -8.63 | -8.50 | -8.15 | -7.83 | -7.59 | -7.30 |
| 1789.34 | -8.81 | -8.89 | -8.90 | -8.86 | -8.72 | -8.62 | -8.42 | -8.18 | -7.92 | -7.55 | -7.29 |
| 1928.85 | -8.87 | -8.91 | -8.93 | -8.90 | -8.81 | -8.61 | -8.52 | -8.21 | -7.87 | -7.57 | -7.27 |
| 2079.31 | -9.01 | -9.12 | -9.17 | -9.14 | -9.10 | -8.88 | -8.64 | -8.35 | -8.04 | -7.75 | -7.47 |
| 2241.59 | -8.97 | -9.08 | -9.17 | -9.02 | -8.98 | -8.71 | -8.68 | -8.22 | -8.04 | -7.76 | -7.42 |
| 2416.60 | -9.03 | -9.26 | -9.27 | -9.27 | -9.23 | -8.92 | -8.82 | -8.52 | -8.14 | -7.94 | -7.63 |
| 2605.36 | -9.16 | -9.17 | -9.23 | -9.22 | -9.17 | -9.12 | -8.87 | -8.57 | -8.20 | -7.95 | -7.65 |
| 2808.94 | -9.09 | -9.29 | -9.32 | -9.36 | -9.29 | -9.03 | -8.94 | -8.51 | -8.34 | -7.95 | -7.66 |
| 3028.50 | -9.04 | -9.21 | -9.38 | -9.31 | -9.21 | -9.07 | -8.85 | -8.59 | -8.24 | -7.94 | -7.59 |
| 3265.30 | -9.14 | -9.27 | -9.33 | -9.26 | -9.16 | -9.09 | -8.83 | -8.70 | -8.45 | -8.05 | -7.71 |
| 3520.69 | -9.08 | -9.17 | -9.22 | -9.23 | -9.20 | -9.04 | -8.92 | -8.52 | -8.20 | -7.97 | -7.70 |
| 3796.13 | -8.89 | -9.09 | -9.14 | -9.18 | -9.20 | -8.98 | -8.82 | -8.50 | -8.20 | -7.97 | -7.61 |

| Wavelength (nm) | 506.40 | 507.82 | 509.25 | 510.67 | 512.10 | 513.52 | 514.94 | 516.37 | 517.79 | 519.22 | 520.64 |      |
|-----------------|--------|--------|--------|--------|--------|--------|--------|--------|--------|--------|--------|------|
| Time (ps)       | -3.78  | 0.07   | 0.05   | 0.12   | 0.11   | 0.02   | 0.03   | 0.13   | 0.01   | 0.03   | 0.10   | 0.12 |

|       |        |        |        |        |        |        |        |        |        |        |        |
|-------|--------|--------|--------|--------|--------|--------|--------|--------|--------|--------|--------|
| -3.28 | -0.01  | 0.05   | -0.01  | 0.09   | 0.03   | 0.07   | 0.07   | 0.08   | 0.08   | 0.05   | 0.06   |
| -2.78 | -0.12  | -0.07  | -0.15  | -0.06  | -0.02  | -0.13  | -0.08  | -0.15  | -0.02  | -0.13  | -0.04  |
| -2.28 | 0.07   | 0.04   | 0.07   | 0.06   | 0.07   | 0.01   | 0.05   | 0.12   | 0.04   | 0.07   | -0.01  |
| -1.78 | 0.01   | -0.02  | -0.01  | -0.12  | -0.05  | -0.05  | -0.03  | -0.03  | -0.07  | -0.11  | -0.11  |
| -1.28 | -0.02  | -0.11  | 0.00   | -0.07  | -0.05  | -0.06  | -0.08  | -0.06  | -0.05  | 0.00   | -0.06  |
| -0.78 | 0.00   | 0.04   | 0.02   | -0.03  | 0.07   | 0.05   | 0.00   | 0.05   | 0.02   | 0.02   | 0.05   |
| -0.28 | -0.01  | 0.01   | -0.04  | 0.03   | -0.08  | 0.08   | -0.06  | -0.02  | -0.04  | -0.01  | 0.01   |
| -0.18 | 0.00   | -0.01  | -0.06  | 0.02   | -0.04  | -0.09  | 0.04   | -0.04  | 0.01   | -0.09  | -0.06  |
| -0.08 | 0.11   | 0.07   | 0.09   | 0.13   | 0.06   | 0.06   | 0.09   | 0.11   | 0.07   | 0.06   | 0.09   |
| 0.02  | 0.01   | 0.01   | -0.03  | -0.07  | -0.07  | -0.17  | -0.03  | -0.04  | 0.01   | -0.01  | -0.05  |
| 0.12  | 0.10   | 0.04   | 0.16   | 0.03   | 0.09   | 0.02   | 0.10   | 0.11   | 0.09   | 0.01   | 0.00   |
| 0.22  | 0.05   | 0.12   | -0.01  | 0.03   | 0.09   | -0.04  | 0.08   | 0.06   | 0.03   | 0.00   | 0.09   |
| 0.27  | -0.04  | 0.00   | 0.01   | -0.08  | -0.04  | -0.09  | 0.02   | -0.07  | -0.03  | -0.08  | 0.04   |
| 0.32  | 0.13   | 0.05   | 0.16   | 0.13   | 0.10   | -0.01  | 0.13   | 0.07   | 0.09   | 0.07   | 0.09   |
| 0.37  | -0.01  | -0.04  | -0.03  | -0.07  | -0.02  | 0.01   | -0.07  | -0.03  | -0.05  | -0.08  | -0.06  |
| 0.42  | -0.18  | -0.16  | -0.18  | -0.11  | -0.17  | -0.13  | -0.07  | -0.18  | -0.13  | -0.20  | -0.10  |
| 0.47  | -0.06  | -0.07  | -0.09  | -0.12  | 0.01   | -0.12  | 0.01   | 0.01   | -0.01  | -0.11  | -0.10  |
| 0.52  | -0.09  | -0.14  | -0.11  | -0.07  | -0.08  | -0.02  | -0.02  | -0.07  | -0.08  | -0.08  | -0.04  |
| 0.57  | -0.01  | -0.03  | 0.04   | 0.01   | -0.02  | -0.04  | -0.06  | -0.03  | -0.03  | -0.04  | 0.02   |
| 0.62  | 0.03   | 0.00   | 0.07   | -0.02  | 0.00   | -0.01  | 0.07   | 0.02   | 0.02   | -0.05  | 0.03   |
| 0.67  | -0.06  | -0.09  | -0.14  | -0.16  | -0.11  | -0.08  | -0.09  | -0.08  | -0.05  | -0.06  | -0.12  |
| 0.72  | -0.04  | -0.08  | -0.15  | -0.12  | -0.08  | -0.12  | -0.12  | 0.03   | -0.18  | -0.15  | -0.11  |
| 0.77  | -0.06  | -0.03  | -0.12  | -0.11  | -0.09  | -0.10  | -0.05  | -0.05  | -0.08  | -0.04  | -0.01  |
| 0.82  | 0.09   | 0.03   | 0.08   | 0.04   | 0.00   | -0.01  | 0.09   | 0.10   | 0.03   | 0.00   | -0.05  |
| 0.87  | -0.04  | -0.06  | 0.01   | -0.16  | 0.00   | -0.05  | 0.01   | -0.02  | -0.11  | -0.16  | 0.00   |
| 0.92  | 0.11   | 0.06   | 0.13   | 0.05   | 0.05   | 0.06   | 0.21   | 0.10   | 0.11   | 0.12   | 0.09   |
| 0.97  | -0.06  | -0.01  | -0.03  | -0.04  | -0.04  | -0.05  | -0.01  | 0.02   | 0.00   | -0.06  | -0.09  |
| 1.02  | 0.01   | 0.04   | 0.02   | 0.00   | -0.04  | -0.09  | 0.12   | 0.03   | 0.01   | -0.01  | 0.06   |
| 1.07  | 0.06   | 0.09   | 0.12   | 0.03   | 0.15   | 0.10   | 0.00   | 0.10   | 0.17   | -0.03  | 0.08   |
| 1.12  | -0.03  | -0.03  | -0.05  | -0.06  | -0.02  | 0.00   | 0.07   | -0.04  | -0.13  | -0.15  | 0.05   |
| 1.17  | 1.58   | 0.68   | -0.14  | -0.81  | -1.03  | -1.03  | -0.79  | -0.44  | -0.10  | 0.03   | 0.17   |
| 1.22  | -16.53 | -21.94 | -26.73 | -30.62 | -33.21 | -35.10 | -36.33 | -37.04 | -36.70 | -35.42 | -32.61 |
| 1.27  | 84.78  | 92.18  | 95.69  | 95.69  | 93.72  | 89.43  | 84.33  | 76.17  | 67.69  | 57.49  | 47.55  |
| 1.32  | -38.60 | -49.51 | -60.48 | -70.88 | -79.43 | -84.87 | -87.00 | -85.18 | -79.36 | -70.45 | -58.14 |
| 1.37  | -13.77 | -12.59 | -11.54 | -10.81 | -10.49 | -10.69 | -11.36 | -12.64 | -13.98 | -15.42 | -16.57 |
| 1.42  | -16.10 | -16.20 | -15.92 | -15.72 | -15.49 | -15.40 | -15.39 | -15.71 | -16.23 | -16.80 | -17.32 |
| 1.47  | -14.93 | -15.60 | -16.33 | -16.96 | -17.40 | -17.46 | -17.36 | -17.00 | -16.49 | -16.02 | -15.43 |
| 1.52  | -14.97 | -14.41 | -13.99 | -13.90 | -13.92 | -14.19 | -14.70 | -15.04 | -15.47 | -15.82 | -16.02 |
| 1.57  | -15.82 | -15.80 | -15.38 | -14.92 | -14.26 | -13.75 | -13.38 | -13.22 | -13.40 | -13.76 | -14.13 |
| 1.62  | -12.79 | -13.19 | -13.83 | -14.47 | -14.89 | -15.04 | -15.22 | -15.14 | -14.86 | -14.53 | -14.10 |
| 1.67  | -14.20 | -13.67 | -13.11 | -13.00 | -12.94 | -13.18 | -13.51 | -13.96 | -14.34 | -14.60 | -14.86 |
| 1.72  | -14.34 | -14.73 | -14.69 | -14.76 | -14.40 | -13.95 | -13.35 | -13.00 | -12.63 | -12.41 | -12.34 |
| 1.77  | -12.93 | -12.65 | -12.52 | -12.63 | -12.77 | -13.18 | -13.56 | -13.76 | -13.95 | -13.98 | -13.83 |
| 1.82  | -13.78 | -13.43 | -12.89 | -12.41 | -12.00 | -11.80 | -11.74 | -11.98 | -12.14 | -12.60 | -12.97 |
| 1.87  | -13.14 | -13.44 | -13.66 | -13.77 | -13.81 | -13.61 | -13.25 | -12.85 | -12.54 | -12.28 | -12.06 |
| 1.92  | -13.00 | -12.54 | -12.18 | -12.09 | -11.94 | -12.23 | -12.35 | -12.64 | -12.90 | -13.04 | -12.97 |
| 1.97  | -13.53 | -13.42 | -13.16 | -12.61 | -12.14 | -11.70 | -11.30 | -11.21 | -11.24 | -11.40 | -11.61 |
| 2.02  | -11.87 | -11.78 | -11.80 | -12.12 | -12.16 | -12.38 | -12.44 | -12.39 | -12.34 | -12.24 | -11.91 |
| 2.07  | -12.37 | -11.98 | -11.54 | -11.45 | -11.34 | -11.56 | -11.73 | -11.92 | -12.07 | -12.25 | -12.23 |
| 2.12  | -12.81 | -12.79 | -12.85 | -12.56 | -12.25 | -11.98 | -11.64 | -11.29 | -11.15 | -10.95 | -10.94 |

|      |        |        |        |        |        |        |        |        |        |        |        |
|------|--------|--------|--------|--------|--------|--------|--------|--------|--------|--------|--------|
| 2.17 | -11.46 | -11.32 | -11.34 | -11.49 | -11.57 | -11.67 | -11.79 | -11.73 | -11.70 | -11.57 | -11.36 |
| 2.22 | -12.64 | -12.42 | -11.97 | -11.57 | -11.22 | -11.05 | -10.92 | -11.02 | -11.10 | -11.24 | -11.48 |
| 2.27 | -11.98 | -12.18 | -12.23 | -12.20 | -12.12 | -11.88 | -11.72 | -11.34 | -11.23 | -10.96 | -10.69 |
| 2.32 | -11.66 | -11.40 | -11.08 | -10.96 | -10.92 | -11.07 | -11.19 | -11.34 | -11.47 | -11.48 | -11.34 |
| 2.37 | -12.25 | -12.02 | -11.73 | -11.44 | -11.05 | -10.76 | -10.51 | -10.46 | -10.44 | -10.56 | -10.57 |
| 2.42 | -11.60 | -11.68 | -11.82 | -11.86 | -11.80 | -11.64 | -11.52 | -11.29 | -11.06 | -10.83 | -10.64 |
| 2.47 | -11.88 | -11.49 | -11.17 | -10.94 | -10.82 | -10.82 | -10.87 | -11.01 | -11.08 | -11.11 | -11.15 |
| 2.52 | -12.11 | -12.06 | -11.77 | -11.68 | -11.29 | -10.99 | -10.71 | -10.61 | -10.41 | -10.42 | -10.39 |
| 2.57 | -11.32 | -11.25 | -11.10 | -11.15 | -11.10 | -11.17 | -11.25 | -11.10 | -11.06 | -10.87 | -10.71 |
| 2.62 | -11.94 | -11.60 | -11.18 | -10.91 | -10.57 | -10.49 | -10.50 | -10.61 | -10.69 | -10.73 | -10.90 |
| 2.67 | -11.57 | -11.48 | -11.40 | -11.13 | -10.99 | -10.62 | -10.43 | -10.26 | -10.03 | -10.03 | -9.93  |
| 2.72 | -11.12 | -10.94 | -10.72 | -10.67 | -10.62 | -10.74 | -10.69 | -10.75 | -10.71 | -10.75 | -10.60 |
| 2.77 | -11.66 | -11.44 | -11.19 | -10.83 | -10.47 | -10.31 | -10.13 | -10.04 | -10.01 | -10.13 | -10.18 |
| 2.82 | -11.20 | -11.16 | -10.96 | -10.93 | -10.81 | -10.62 | -10.55 | -10.34 | -10.21 | -10.07 | -9.92  |
| 2.87 | -11.20 | -10.92 | -10.64 | -10.37 | -10.28 | -10.20 | -10.17 | -10.23 | -10.25 | -10.26 | -10.19 |
| 2.92 | -11.42 | -11.40 | -11.08 | -10.92 | -10.51 | -10.35 | -10.11 | -9.86  | -9.84  | -9.76  | -9.84  |
| 2.97 | -10.69 | -10.58 | -10.46 | -10.36 | -10.36 | -10.30 | -10.23 | -10.31 | -10.12 | -10.01 | -9.86  |
| 3.02 | -11.11 | -10.85 | -10.52 | -10.32 | -10.03 | -9.96  | -9.94  | -9.87  | -9.95  | -9.98  | -9.97  |
| 3.07 | -11.15 | -11.00 | -10.86 | -10.67 | -10.49 | -10.20 | -9.97  | -9.96  | -9.85  | -9.70  | -9.57  |
| 3.12 | -10.61 | -10.44 | -10.29 | -10.12 | -10.04 | -10.14 | -9.99  | -10.01 | -9.92  | -9.92  | -9.72  |
| 3.17 | -11.15 | -10.89 | -10.62 | -10.27 | -10.08 | -9.89  | -9.73  | -9.62  | -9.66  | -9.68  | -9.61  |
| 3.22 | -10.92 | -10.72 | -10.66 | -10.54 | -10.32 | -10.25 | -10.04 | -9.97  | -9.86  | -9.80  | -9.55  |
| 3.42 | -10.96 | -10.61 | -10.31 | -10.08 | -9.85  | -9.65  | -9.62  | -9.65  | -9.78  | -9.64  | -9.65  |
| 3.62 | -10.81 | -10.70 | -10.51 | -10.32 | -10.15 | -9.93  | -9.80  | -9.66  | -9.55  | -9.43  | -9.37  |
| 3.82 | -10.71 | -10.45 | -10.17 | -9.96  | -9.75  | -9.61  | -9.57  | -9.54  | -9.53  | -9.52  | -9.39  |
| 4.02 | -10.66 | -10.50 | -10.27 | -10.13 | -9.86  | -9.70  | -9.60  | -9.55  | -9.38  | -9.29  | -9.21  |
| 4.22 | -10.44 | -10.24 | -9.97  | -9.73  | -9.60  | -9.48  | -9.35  | -9.37  | -9.44  | -9.29  | -9.22  |
| 4.42 | -10.43 | -10.11 | -9.94  | -9.75  | -9.58  | -9.39  | -9.15  | -9.10  | -9.05  | -8.99  | -8.80  |
| 4.62 | -10.39 | -10.12 | -9.78  | -9.69  | -9.50  | -9.40  | -9.25  | -9.17  | -9.18  | -9.04  | -9.04  |
| 4.82 | -10.39 | -10.13 | -9.83  | -9.75  | -9.48  | -9.35  | -9.12  | -9.01  | -9.01  | -8.96  | -8.85  |
| 5.02 | -10.23 | -9.97  | -9.71  | -9.48  | -9.35  | -9.18  | -9.11  | -9.13  | -8.87  | -8.92  | -8.80  |
| 5.22 | -10.26 | -10.05 | -9.76  | -9.51  | -9.40  | -9.29  | -9.11  | -8.94  | -8.83  | -8.87  | -8.79  |
| 5.42 | -10.06 | -9.84  | -9.60  | -9.49  | -9.25  | -9.13  | -8.90  | -8.93  | -8.83  | -8.83  | -8.70  |
| 5.62 | -9.93  | -9.73  | -9.43  | -9.27  | -9.01  | -8.83  | -8.62  | -8.69  | -8.61  | -8.45  | -8.47  |
| 5.82 | -9.83  | -9.67  | -9.35  | -9.12  | -9.05  | -8.86  | -8.67  | -8.65  | -8.56  | -8.59  | -8.39  |
| 6.02 | -9.68  | -9.54  | -9.30  | -9.07  | -8.85  | -8.71  | -8.56  | -8.45  | -8.42  | -8.34  | -8.26  |
| 6.22 | -9.78  | -9.52  | -9.24  | -8.96  | -8.72  | -8.74  | -8.56  | -8.37  | -8.38  | -8.33  | -8.29  |
| 6.42 | -9.75  | -9.50  | -9.26  | -8.99  | -8.80  | -8.66  | -8.58  | -8.47  | -8.37  | -8.32  | -8.24  |
| 6.62 | -9.68  | -9.45  | -9.13  | -9.01  | -8.72  | -8.63  | -8.47  | -8.42  | -8.21  | -8.32  | -8.12  |
| 6.82 | -9.57  | -9.28  | -9.05  | -8.88  | -8.63  | -8.35  | -8.28  | -8.25  | -8.19  | -8.11  | -7.99  |
| 7.02 | -9.49  | -9.25  | -8.94  | -8.72  | -8.54  | -8.44  | -8.26  | -8.11  | -8.08  | -8.02  | -7.90  |
| 7.22 | -9.48  | -9.29  | -8.99  | -8.71  | -8.51  | -8.43  | -8.22  | -8.10  | -8.00  | -8.00  | -7.80  |
| 7.42 | -9.48  | -9.31  | -9.00  | -8.86  | -8.61  | -8.39  | -8.33  | -8.21  | -8.10  | -7.96  | -7.94  |
| 7.62 | -9.35  | -9.12  | -8.83  | -8.66  | -8.47  | -8.21  | -8.13  | -8.03  | -7.92  | -7.86  | -7.85  |
| 7.82 | -9.20  | -9.00  | -8.69  | -8.41  | -8.26  | -8.12  | -7.95  | -7.85  | -7.78  | -7.76  | -7.64  |
| 8.02 | -9.33  | -9.08  | -8.80  | -8.55  | -8.24  | -8.13  | -7.98  | -7.91  | -7.81  | -7.75  | -7.54  |
| 8.22 | -9.01  | -8.80  | -8.51  | -8.27  | -8.02  | -8.03  | -7.85  | -7.65  | -7.56  | -7.51  | -7.49  |
| 8.42 | -9.14  | -8.91  | -8.63  | -8.42  | -8.18  | -8.09  | -7.95  | -7.75  | -7.69  | -7.65  | -7.51  |
| 8.62 | -9.01  | -8.74  | -8.46  | -8.24  | -8.07  | -7.91  | -7.69  | -7.59  | -7.44  | -7.51  | -7.41  |
| 8.82 | -9.19  | -8.88  | -8.58  | -8.36  | -8.08  | -8.00  | -7.85  | -7.61  | -7.67  | -7.56  | -7.43  |



|       |       |       |       |       |       |       |       |       |       |       |       |
|-------|-------|-------|-------|-------|-------|-------|-------|-------|-------|-------|-------|
| 9.02  | -8.88 | -8.57 | -8.35 | -8.17 | -7.94 | -7.75 | -7.56 | -7.52 | -7.51 | -7.36 | -7.28 |
| 9.22  | -9.05 | -8.78 | -8.49 | -8.27 | -8.08 | -7.87 | -7.78 | -7.63 | -7.63 | -7.50 | -7.42 |
| 9.42  | -8.98 | -8.74 | -8.40 | -8.28 | -7.93 | -7.80 | -7.68 | -7.50 | -7.53 | -7.40 | -7.31 |
| 9.62  | -8.91 | -8.68 | -8.44 | -8.14 | -7.99 | -7.72 | -7.57 | -7.44 | -7.43 | -7.31 | -7.22 |
| 9.82  | -8.87 | -8.57 | -8.39 | -8.13 | -7.88 | -7.76 | -7.62 | -7.47 | -7.47 | -7.26 | -7.20 |
| 10.02 | -8.96 | -8.56 | -8.40 | -8.16 | -7.83 | -7.69 | -7.60 | -7.44 | -7.47 | -7.30 | -7.22 |
| 10.22 | -8.81 | -8.57 | -8.28 | -8.12 | -7.73 | -7.72 | -7.51 | -7.36 | -7.37 | -7.26 | -7.10 |
| 10.42 | -8.83 | -8.63 | -8.25 | -8.11 | -7.87 | -7.70 | -7.62 | -7.47 | -7.35 | -7.23 | -7.23 |
| 10.62 | -8.78 | -8.59 | -8.23 | -8.10 | -7.86 | -7.77 | -7.48 | -7.39 | -7.40 | -7.22 | -7.17 |
| 10.82 | -8.84 | -8.58 | -8.16 | -8.10 | -7.71 | -7.63 | -7.48 | -7.29 | -7.18 | -7.16 | -7.07 |
| 11.02 | -8.69 | -8.47 | -8.15 | -7.91 | -7.70 | -7.58 | -7.42 | -7.26 | -7.16 | -7.11 | -6.98 |
| 11.22 | -8.59 | -8.37 | -8.05 | -7.76 | -7.58 | -7.44 | -7.22 | -7.16 | -7.05 | -7.02 | -6.91 |
| 11.42 | -8.47 | -8.32 | -7.99 | -7.72 | -7.51 | -7.39 | -7.21 | -7.03 | -6.98 | -6.97 | -6.89 |
| 11.62 | -8.56 | -8.41 | -8.10 | -7.85 | -7.69 | -7.47 | -7.34 | -7.17 | -7.15 | -7.07 | -6.97 |
| 11.82 | -8.54 | -8.34 | -8.05 | -7.89 | -7.60 | -7.53 | -7.19 | -7.10 | -7.09 | -7.04 | -6.90 |
| 12.02 | -8.49 | -8.19 | -7.91 | -7.73 | -7.47 | -7.34 | -7.10 | -7.04 | -6.91 | -6.90 | -6.78 |
| 12.22 | -8.70 | -8.44 | -8.10 | -7.83 | -7.67 | -7.50 | -7.33 | -7.28 | -7.11 | -7.03 | -6.89 |
| 12.42 | -8.40 | -8.19 | -7.82 | -7.60 | -7.31 | -7.10 | -7.05 | -6.90 | -6.95 | -6.75 | -6.70 |
| 12.62 | -8.50 | -8.17 | -7.87 | -7.68 | -7.32 | -7.28 | -7.09 | -7.01 | -6.97 | -6.82 | -6.68 |
| 12.82 | -8.11 | -7.92 | -7.64 | -7.34 | -7.10 | -6.93 | -6.80 | -6.73 | -6.61 | -6.59 | -6.49 |
| 13.02 | -8.57 | -8.19 | -7.88 | -7.62 | -7.48 | -7.38 | -7.11 | -7.07 | -6.93 | -6.84 | -6.67 |
| 13.22 | -8.38 | -8.18 | -7.84 | -7.47 | -7.33 | -7.19 | -7.10 | -6.80 | -6.87 | -6.72 | -6.69 |
| 13.42 | -8.54 | -8.23 | -7.91 | -7.80 | -7.44 | -7.20 | -7.18 | -7.02 | -7.02 | -6.86 | -6.76 |
| 13.50 | -8.23 | -7.89 | -7.52 | -7.49 | -7.16 | -6.98 | -6.84 | -6.75 | -6.59 | -6.60 | -6.46 |
| 13.59 | -8.45 | -8.23 | -7.90 | -7.65 | -7.47 | -7.21 | -7.15 | -6.99 | -6.85 | -6.83 | -6.70 |
| 13.68 | -8.32 | -8.14 | -7.79 | -7.60 | -7.27 | -7.13 | -6.96 | -6.79 | -6.77 | -6.77 | -6.59 |
| 13.78 | -8.39 | -8.16 | -7.85 | -7.56 | -7.33 | -7.14 | -6.94 | -6.85 | -6.83 | -6.75 | -6.66 |
| 13.88 | -8.40 | -8.16 | -7.92 | -7.58 | -7.38 | -7.18 | -7.05 | -6.96 | -6.93 | -6.76 | -6.73 |
| 14.00 | -8.53 | -8.21 | -7.90 | -7.71 | -7.51 | -7.29 | -7.17 | -6.98 | -6.92 | -6.88 | -6.72 |
| 14.12 | -8.39 | -8.22 | -7.84 | -7.50 | -7.32 | -7.21 | -7.00 | -6.96 | -6.77 | -6.79 | -6.62 |
| 14.25 | -8.35 | -8.12 | -7.79 | -7.64 | -7.34 | -7.21 | -7.02 | -6.90 | -6.73 | -6.76 | -6.58 |
| 14.40 | -8.57 | -8.32 | -8.02 | -7.77 | -7.45 | -7.30 | -7.18 | -7.03 | -7.06 | -6.91 | -6.70 |
| 14.55 | -8.31 | -8.12 | -7.70 | -7.53 | -7.38 | -7.18 | -7.02 | -6.85 | -6.81 | -6.73 | -6.57 |
| 14.72 | -8.28 | -8.07 | -7.68 | -7.50 | -7.30 | -7.10 | -6.90 | -6.92 | -6.77 | -6.58 | -6.57 |
| 14.90 | -8.06 | -7.82 | -7.57 | -7.43 | -7.07 | -6.90 | -6.76 | -6.70 | -6.64 | -6.50 | -6.45 |
| 15.09 | -8.25 | -7.92 | -7.71 | -7.39 | -7.16 | -6.93 | -6.79 | -6.65 | -6.62 | -6.54 | -6.36 |
| 15.30 | -8.15 | -7.84 | -7.54 | -7.32 | -7.12 | -6.99 | -6.72 | -6.70 | -6.53 | -6.48 | -6.41 |
| 15.53 | -8.39 | -8.12 | -7.87 | -7.65 | -7.29 | -7.26 | -6.99 | -6.89 | -6.76 | -6.61 | -6.57 |
| 15.77 | -8.14 | -7.89 | -7.59 | -7.29 | -7.06 | -7.00 | -6.78 | -6.69 | -6.57 | -6.51 | -6.41 |
| 16.04 | -8.37 | -8.13 | -7.83 | -7.63 | -7.36 | -7.18 | -6.98 | -6.82 | -6.72 | -6.64 | -6.50 |
| 16.32 | -8.06 | -7.90 | -7.63 | -7.22 | -7.08 | -6.87 | -6.75 | -6.58 | -6.44 | -6.36 | -6.32 |
| 16.63 | -8.29 | -8.01 | -7.65 | -7.43 | -7.22 | -7.01 | -6.84 | -6.71 | -6.68 | -6.44 | -6.43 |
| 16.96 | -8.11 | -7.88 | -7.51 | -7.29 | -7.10 | -6.92 | -6.74 | -6.63 | -6.54 | -6.46 | -6.35 |
| 17.31 | -8.22 | -7.95 | -7.57 | -7.38 | -7.16 | -6.97 | -6.83 | -6.65 | -6.50 | -6.46 | -6.36 |
| 17.70 | -8.13 | -7.94 | -7.65 | -7.38 | -7.14 | -6.98 | -6.79 | -6.62 | -6.53 | -6.53 | -6.33 |
| 18.11 | -8.01 | -7.85 | -7.35 | -7.15 | -6.96 | -6.79 | -6.61 | -6.52 | -6.39 | -6.31 | -6.20 |
| 18.56 | -8.05 | -7.67 | -7.46 | -7.23 | -6.94 | -6.71 | -6.62 | -6.48 | -6.33 | -6.25 | -6.25 |
| 19.04 | -8.10 | -7.76 | -7.48 | -7.27 | -7.01 | -6.87 | -6.78 | -6.61 | -6.45 | -6.35 | -6.22 |
| 19.56 | -8.13 | -7.88 | -7.55 | -7.20 | -7.03 | -6.84 | -6.70 | -6.58 | -6.39 | -6.39 | -6.21 |
| 20.12 | -8.13 | -7.86 | -7.63 | -7.31 | -7.04 | -6.86 | -6.70 | -6.55 | -6.46 | -6.36 | -6.36 |

|        |       |       |       |       |       |       |       |       |       |       |       |
|--------|-------|-------|-------|-------|-------|-------|-------|-------|-------|-------|-------|
| 20.72  | -8.25 | -7.85 | -7.57 | -7.32 | -7.08 | -6.89 | -6.72 | -6.60 | -6.50 | -6.50 | -6.24 |
| 21.37  | -8.16 | -7.83 | -7.46 | -7.24 | -6.99 | -6.85 | -6.62 | -6.57 | -6.46 | -6.31 | -6.17 |
| 22.08  | -8.17 | -7.95 | -7.65 | -7.40 | -7.19 | -6.95 | -6.75 | -6.65 | -6.49 | -6.42 | -6.40 |
| 22.84  | -8.20 | -7.90 | -7.62 | -7.38 | -7.16 | -6.97 | -6.68 | -6.61 | -6.54 | -6.38 | -6.24 |
| 23.65  | -8.00 | -7.72 | -7.42 | -7.22 | -6.99 | -6.81 | -6.59 | -6.51 | -6.38 | -6.36 | -6.14 |
| 24.54  | -7.98 | -7.66 | -7.38 | -7.21 | -6.87 | -6.71 | -6.54 | -6.40 | -6.24 | -6.21 | -5.98 |
| 25.49  | -8.02 | -7.77 | -7.50 | -7.27 | -7.01 | -6.86 | -6.59 | -6.54 | -6.38 | -6.31 | -6.11 |
| 26.51  | -7.83 | -7.60 | -7.24 | -7.04 | -6.79 | -6.58 | -6.46 | -6.26 | -6.19 | -6.03 | -5.97 |
| 27.62  | -8.02 | -7.73 | -7.39 | -7.20 | -6.89 | -6.68 | -6.58 | -6.38 | -6.37 | -6.18 | -6.00 |
| 28.81  | -7.98 | -7.71 | -7.30 | -7.09 | -6.83 | -6.67 | -6.51 | -6.33 | -6.25 | -6.13 | -5.98 |
| 30.10  | -7.86 | -7.53 | -7.14 | -7.01 | -6.77 | -6.56 | -6.32 | -6.22 | -6.08 | -6.00 | -5.85 |
| 31.49  | -7.82 | -7.54 | -7.28 | -6.92 | -6.69 | -6.52 | -6.24 | -6.22 | -6.09 | -5.96 | -5.83 |
| 32.98  | -7.86 | -7.61 | -7.22 | -6.95 | -6.71 | -6.53 | -6.35 | -6.27 | -6.14 | -6.03 | -5.84 |
| 34.60  | -7.83 | -7.49 | -7.09 | -6.86 | -6.64 | -6.46 | -6.30 | -6.18 | -6.00 | -5.91 | -5.80 |
| 36.34  | -7.84 | -7.52 | -7.21 | -7.00 | -6.74 | -6.54 | -6.36 | -6.22 | -6.10 | -6.01 | -5.81 |
| 38.21  | -7.61 | -7.34 | -6.95 | -6.78 | -6.55 | -6.35 | -6.18 | -5.98 | -5.92 | -5.77 | -5.63 |
| 40.24  | -7.84 | -7.53 | -7.18 | -6.84 | -6.65 | -6.42 | -6.20 | -6.07 | -6.02 | -5.82 | -5.72 |
| 42.42  | -7.67 | -7.32 | -6.97 | -6.78 | -6.51 | -6.21 | -5.98 | -5.87 | -5.79 | -5.68 | -5.55 |
| 44.78  | -7.73 | -7.44 | -7.22 | -6.84 | -6.65 | -6.43 | -6.19 | -6.06 | -5.96 | -5.80 | -5.70 |
| 47.32  | -7.60 | -7.36 | -6.90 | -6.56 | -6.52 | -6.26 | -6.11 | -5.91 | -5.79 | -5.63 | -5.57 |
| 50.06  | -7.59 | -7.39 | -7.19 | -6.87 | -6.57 | -6.39 | -6.18 | -5.96 | -5.84 | -5.79 | -5.68 |
| 53.01  | -7.70 | -7.41 | -7.08 | -6.84 | -6.65 | -6.39 | -6.23 | -5.99 | -5.88 | -5.78 | -5.59 |
| 56.20  | -7.66 | -7.41 | -7.05 | -6.83 | -6.52 | -6.33 | -6.11 | -6.00 | -5.87 | -5.79 | -5.61 |
| 59.64  | -7.71 | -7.42 | -7.05 | -6.83 | -6.61 | -6.49 | -6.24 | -6.03 | -5.90 | -5.74 | -5.64 |
| 63.34  | -7.37 | -7.20 | -6.84 | -6.63 | -6.36 | -6.16 | -6.00 | -5.83 | -5.64 | -5.53 | -5.39 |
| 67.34  | -7.56 | -7.29 | -7.02 | -6.71 | -6.42 | -6.20 | -6.00 | -5.84 | -5.77 | -5.61 | -5.49 |
| 71.65  | -7.66 | -7.37 | -7.03 | -6.77 | -6.48 | -6.34 | -6.13 | -5.91 | -5.83 | -5.67 | -5.49 |
| 76.30  | -7.78 | -7.43 | -7.18 | -6.89 | -6.61 | -6.40 | -6.24 | -6.02 | -5.86 | -5.69 | -5.56 |
| 81.32  | -7.71 | -7.45 | -7.07 | -6.88 | -6.57 | -6.32 | -6.10 | -5.98 | -5.77 | -5.65 | -5.55 |
| 86.73  | -7.73 | -7.49 | -7.12 | -6.76 | -6.57 | -6.29 | -6.14 | -5.90 | -5.81 | -5.63 | -5.50 |
| 92.56  | -7.57 | -7.29 | -7.01 | -6.74 | -6.44 | -6.20 | -5.96 | -5.78 | -5.67 | -5.56 | -5.38 |
| 98.85  | -7.57 | -7.29 | -6.91 | -6.70 | -6.38 | -6.22 | -6.00 | -5.79 | -5.59 | -5.48 | -5.27 |
| 105.64 | -7.54 | -7.29 | -6.91 | -6.60 | -6.36 | -6.18 | -5.96 | -5.82 | -5.62 | -5.43 | -5.31 |
| 112.96 | -7.67 | -7.36 | -6.98 | -6.78 | -6.54 | -6.23 | -5.99 | -5.78 | -5.67 | -5.57 | -5.33 |
| 120.85 | -7.36 | -7.07 | -6.79 | -6.42 | -6.16 | -5.92 | -5.76 | -5.49 | -5.35 | -5.14 | -5.04 |
| 129.36 | -7.77 | -7.46 | -7.12 | -6.82 | -6.56 | -6.35 | -6.02 | -5.96 | -5.72 | -5.57 | -5.34 |
| 138.55 | -7.57 | -7.24 | -6.80 | -6.62 | -6.34 | -6.03 | -5.81 | -5.68 | -5.47 | -5.28 | -5.11 |
| 148.45 | -7.58 | -7.31 | -6.99 | -6.53 | -6.33 | -6.15 | -5.90 | -5.64 | -5.47 | -5.29 | -5.06 |
| 159.13 | -7.52 | -7.17 | -6.81 | -6.60 | -6.32 | -6.09 | -5.83 | -5.62 | -5.47 | -5.36 | -5.05 |
| 170.65 | -7.57 | -7.18 | -6.77 | -6.62 | -6.23 | -6.07 | -5.85 | -5.54 | -5.44 | -5.20 | -4.96 |
| 183.07 | -7.39 | -7.08 | -6.72 | -6.38 | -6.14 | -5.92 | -5.71 | -5.43 | -5.25 | -5.07 | -4.82 |
| 196.47 | -7.41 | -7.10 | -6.87 | -6.55 | -6.20 | -5.96 | -5.70 | -5.52 | -5.28 | -5.14 | -4.82 |
| 210.91 | -7.30 | -7.04 | -6.65 | -6.39 | -6.05 | -5.89 | -5.49 | -5.37 | -5.20 | -4.96 | -4.69 |
| 226.50 | -7.30 | -6.92 | -6.63 | -6.38 | -6.10 | -5.83 | -5.53 | -5.26 | -5.09 | -4.89 | -4.72 |
| 243.31 | -7.24 | -6.94 | -6.64 | -6.33 | -6.06 | -5.80 | -5.44 | -5.33 | -5.04 | -4.90 | -4.56 |
| 261.43 | -7.42 | -7.12 | -6.77 | -6.49 | -6.12 | -5.94 | -5.59 | -5.31 | -5.16 | -4.93 | -4.63 |
| 280.98 | -7.19 | -6.93 | -6.59 | -6.30 | -6.00 | -5.68 | -5.41 | -5.16 | -4.85 | -4.66 | -4.40 |
| 302.07 | -7.13 | -6.77 | -6.32 | -6.14 | -5.77 | -5.60 | -5.27 | -5.09 | -4.89 | -4.63 | -4.36 |
| 324.81 | -7.09 | -6.78 | -6.49 | -6.13 | -5.75 | -5.50 | -5.20 | -4.98 | -4.75 | -4.65 | -4.20 |
| 349.33 | -7.10 | -6.84 | -6.40 | -6.07 | -5.63 | -5.46 | -5.19 | -4.95 | -4.69 | -4.45 | -4.22 |

|         |       |       |       |       |       |       |       |       |       |       |       |
|---------|-------|-------|-------|-------|-------|-------|-------|-------|-------|-------|-------|
| 375.79  | -7.11 | -6.75 | -6.48 | -6.16 | -5.78 | -5.51 | -5.24 | -4.94 | -4.74 | -4.44 | -4.10 |
| 404.31  | -6.99 | -6.61 | -6.29 | -5.97 | -5.71 | -5.34 | -5.02 | -4.74 | -4.60 | -4.30 | -3.94 |
| 435.08  | -7.14 | -6.82 | -6.41 | -6.17 | -5.83 | -5.59 | -5.21 | -4.91 | -4.65 | -4.41 | -4.03 |
| 468.27  | -6.92 | -6.74 | -6.27 | -5.98 | -5.63 | -5.41 | -5.04 | -4.84 | -4.50 | -4.32 | -3.91 |
| 504.06  | -6.88 | -6.56 | -6.31 | -5.95 | -5.56 | -5.31 | -4.91 | -4.63 | -4.42 | -4.19 | -3.78 |
| 542.66  | -6.94 | -6.48 | -6.15 | -5.81 | -5.52 | -5.30 | -4.82 | -4.62 | -4.39 | -4.05 | -3.75 |
| 584.29  | -6.88 | -6.55 | -6.12 | -5.88 | -5.52 | -5.24 | -4.88 | -4.67 | -4.33 | -3.96 | -3.63 |
| 629.18  | -6.72 | -6.42 | -6.01 | -5.69 | -5.32 | -4.97 | -4.72 | -4.44 | -4.14 | -3.86 | -3.52 |
| 677.61  | -6.79 | -6.53 | -6.19 | -5.81 | -5.56 | -5.20 | -4.87 | -4.54 | -4.24 | -3.90 | -3.59 |
| 729.83  | -6.67 | -6.28 | -5.90 | -5.60 | -5.19 | -4.85 | -4.56 | -4.26 | -4.01 | -3.70 | -3.27 |
| 786.16  | -6.76 | -6.32 | -6.00 | -5.66 | -5.35 | -5.08 | -4.77 | -4.35 | -4.06 | -3.76 | -3.36 |
| 846.90  | -6.64 | -6.30 | -5.97 | -5.66 | -5.21 | -4.98 | -4.64 | -4.39 | -4.04 | -3.74 | -3.32 |
| 912.42  | -6.61 | -6.27 | -5.85 | -5.49 | -5.19 | -4.91 | -4.47 | -4.23 | -3.88 | -3.59 | -3.27 |
| 983.08  | -6.46 | -6.29 | -5.90 | -5.59 | -5.17 | -4.85 | -4.53 | -4.16 | -3.91 | -3.56 | -3.14 |
| 1059.29 | -6.70 | -6.51 | -5.98 | -5.68 | -5.33 | -5.01 | -4.67 | -4.36 | -4.04 | -3.80 | -3.35 |
| 1141.48 | -6.61 | -6.23 | -5.87 | -5.53 | -5.16 | -4.86 | -4.53 | -4.16 | -3.83 | -3.47 | -3.07 |
| 1230.13 | -6.59 | -6.33 | -5.96 | -5.59 | -5.27 | -4.93 | -4.67 | -4.21 | -3.92 | -3.64 | -3.17 |
| 1325.73 | -6.72 | -6.38 | -5.99 | -5.60 | -5.35 | -5.07 | -4.57 | -4.33 | -3.95 | -3.62 | -3.28 |
| 1428.84 | -6.68 | -6.44 | -6.11 | -5.69 | -5.38 | -5.07 | -4.66 | -4.41 | -4.01 | -3.64 | -3.27 |
| 1540.05 | -6.93 | -6.62 | -6.14 | -5.81 | -5.45 | -5.10 | -4.75 | -4.41 | -4.07 | -3.78 | -3.35 |
| 1659.99 | -6.87 | -6.52 | -6.15 | -5.87 | -5.48 | -5.25 | -4.83 | -4.51 | -4.09 | -3.81 | -3.32 |
| 1789.34 | -6.92 | -6.60 | -6.12 | -5.88 | -5.52 | -5.18 | -4.76 | -4.42 | -4.07 | -3.73 | -3.29 |
| 1928.85 | -6.92 | -6.70 | -6.24 | -5.92 | -5.53 | -5.23 | -4.81 | -4.44 | -4.07 | -3.77 | -3.36 |
| 2079.31 | -7.14 | -6.78 | -6.48 | -6.15 | -5.78 | -5.40 | -4.99 | -4.71 | -4.31 | -3.98 | -3.57 |
| 2241.59 | -7.01 | -6.72 | -6.42 | -6.04 | -5.71 | -5.37 | -4.96 | -4.58 | -4.22 | -3.95 | -3.46 |
| 2416.60 | -7.17 | -6.97 | -6.62 | -6.21 | -5.87 | -5.48 | -5.16 | -4.86 | -4.45 | -4.07 | -3.59 |
| 2605.36 | -7.25 | -7.00 | -6.64 | -6.29 | -5.91 | -5.59 | -5.23 | -4.84 | -4.45 | -4.04 | -3.66 |
| 2808.94 | -7.26 | -6.94 | -6.70 | -6.40 | -5.92 | -5.59 | -5.24 | -4.93 | -4.41 | -4.07 | -3.72 |
| 3028.50 | -7.32 | -7.06 | -6.68 | -6.43 | -6.04 | -5.75 | -5.30 | -4.98 | -4.56 | -4.26 | -3.72 |
| 3265.30 | -7.41 | -7.05 | -6.77 | -6.47 | -6.08 | -5.81 | -5.46 | -5.02 | -4.61 | -4.24 | -3.84 |
| 3520.69 | -7.29 | -7.06 | -6.75 | -6.43 | -6.11 | -5.80 | -5.37 | -4.99 | -4.63 | -4.32 | -3.76 |
| 3796.13 | -7.22 | -7.10 | -6.70 | -6.46 | -6.09 | -5.82 | -5.43 | -4.99 | -4.61 | -4.29 | -3.82 |

| Wavelength (nm) \ Time (ps) | 522.06 | 523.49 | 524.91 | 526.34 | 527.76 | 529.18 | 530.61 | 532.03 | 533.46 | 534.88 | 536.30 |
|-----------------------------|--------|--------|--------|--------|--------|--------|--------|--------|--------|--------|--------|
| -3.78                       | 0.03   | 0.05   | 0.10   | 0.01   | -0.03  | 0.02   | 0.01   | 0.07   | 0.04   | -0.05  | 0.04   |
| -3.28                       | 0.07   | 0.05   | 0.03   | 0.05   | 0.08   | 0.00   | 0.07   | 0.02   | -0.05  | 0.01   | -0.02  |
| -2.78                       | -0.04  | -0.09  | -0.10  | -0.02  | -0.08  | -0.03  | -0.06  | 0.03   | -0.02  | 0.03   | 0.06   |
| -2.28                       | 0.02   | 0.07   | 0.05   | 0.08   | 0.05   | 0.09   | 0.05   | -0.02  | 0.06   | 0.04   | 0.01   |
| -1.78                       | -0.08  | -0.10  | 0.00   | -0.09  | -0.01  | -0.11  | 0.04   | -0.05  | -0.01  | 0.06   | -0.04  |
| -1.28                       | -0.01  | -0.05  | -0.06  | -0.05  | -0.01  | 0.00   | -0.10  | -0.09  | 0.00   | -0.03  | 0.00   |
| -0.78                       | 0.04   | 0.09   | -0.05  | 0.05   | -0.01  | -0.01  | -0.04  | -0.02  | -0.04  | -0.04  | 0.04   |
| -0.28                       | -0.03  | -0.03  | 0.03   | -0.03  | 0.02   | 0.05   | 0.03   | 0.06   | 0.01   | -0.01  | -0.08  |
| -0.18                       | 0.00   | -0.02  | 0.05   | -0.01  | -0.05  | 0.03   | 0.00   | -0.04  | -0.03  | 0.00   | -0.03  |
| -0.08                       | 0.06   | 0.06   | 0.00   | 0.05   | 0.15   | 0.09   | 0.01   | 0.01   | -0.02  | -0.03  | -0.06  |
| 0.02                        | -0.06  | 0.02   | -0.09  | 0.00   | 0.07   | 0.03   | 0.00   | -0.03  | 0.00   | -0.01  | 0.02   |
| 0.12                        | 0.04   | 0.09   | 0.01   | 0.09   | 0.01   | 0.06   | -0.06  | 0.00   | 0.11   | 0.05   | 0.04   |
| 0.22                        | 0.02   | 0.10   | 0.02   | -0.02  | 0.00   | 0.05   | -0.01  | -0.03  | 0.02   | 0.03   | -0.05  |

|      |        |        |        |        |        |        |        |        |        |        |        |
|------|--------|--------|--------|--------|--------|--------|--------|--------|--------|--------|--------|
| 0.27 | 0.01   | 0.02   | -0.10  | 0.03   | -0.07  | -0.02  | -0.04  | 0.01   | 0.00   | -0.08  | -0.11  |
| 0.32 | 0.01   | 0.00   | 0.03   | 0.13   | 0.10   | 0.03   | 0.08   | 0.05   | 0.01   | 0.05   | 0.05   |
| 0.37 | -0.13  | 0.03   | 0.01   | -0.02  | -0.01  | 0.07   | -0.12  | -0.04  | -0.01  | 0.00   | -0.16  |
| 0.42 | -0.19  | -0.18  | -0.18  | -0.12  | -0.04  | -0.16  | -0.09  | -0.13  | -0.12  | -0.07  | -0.16  |
| 0.47 | -0.08  | 0.01   | -0.12  | 0.00   | -0.08  | 0.07   | -0.07  | -0.15  | -0.11  | -0.07  | -0.09  |
| 0.52 | -0.08  | 0.03   | 0.02   | -0.03  | -0.01  | -0.08  | -0.16  | -0.09  | -0.08  | -0.01  | -0.08  |
| 0.57 | -0.09  | 0.09   | 0.02   | 0.00   | 0.05   | 0.06   | 0.00   | -0.04  | -0.02  | 0.03   | -0.07  |
| 0.62 | 0.01   | -0.03  | 0.00   | 0.06   | 0.00   | 0.03   | -0.11  | -0.06  | -0.02  | -0.05  | -0.01  |
| 0.67 | -0.05  | -0.11  | -0.14  | -0.09  | 0.00   | 0.05   | -0.06  | -0.05  | -0.06  | -0.06  | -0.14  |
| 0.72 | -0.14  | -0.08  | -0.10  | -0.08  | -0.15  | -0.12  | -0.02  | -0.06  | -0.07  | -0.07  | -0.12  |
| 0.77 | -0.11  | -0.02  | 0.01   | -0.02  | -0.03  | 0.02   | -0.02  | -0.01  | -0.06  | 0.08   | -0.06  |
| 0.82 | -0.06  | 0.07   | -0.04  | -0.02  | 0.09   | 0.06   | 0.02   | 0.02   | 0.04   | 0.04   | -0.04  |
| 0.87 | -0.06  | -0.05  | 0.01   | -0.03  | -0.06  | -0.07  | -0.06  | 0.00   | -0.01  | 0.01   | -0.12  |
| 0.92 | 0.02   | 0.02   | 0.04   | 0.03   | 0.09   | 0.03   | -0.02  | 0.09   | 0.08   | -0.02  | -0.02  |
| 0.97 | 0.05   | -0.02  | -0.04  | -0.01  | -0.01  | -0.07  | -0.10  | 0.02   | -0.05  | -0.03  | -0.02  |
| 1.02 | -0.06  | 0.04   | -0.03  | -0.04  | 0.08   | 0.01   | 0.03   | 0.00   | -0.06  | 0.03   | 0.00   |
| 1.07 | 0.13   | 0.11   | 0.05   | 0.22   | 0.01   | 0.10   | 0.06   | -0.01  | -0.10  | 0.12   | 0.05   |
| 1.12 | 0.01   | -0.04  | -0.24  | -0.05  | 0.11   | 0.03   | -0.15  | -0.06  | 0.01   | -0.01  | -0.14  |
| 1.17 | 0.15   | 0.07   | 0.00   | 0.11   | 0.14   | 0.06   | -0.07  | -0.03  | -0.07  | -0.01  | 0.00   |
| 1.22 | -28.39 | -23.00 | -16.70 | -10.28 | -4.45  | -0.20  | 2.49   | 3.40   | 3.03   | 1.90   | 0.48   |
| 1.27 | 37.34  | 27.42  | 17.92  | 9.79   | 2.94   | -2.91  | -7.73  | -11.59 | -14.53 | -17.77 | -20.17 |
| 1.32 | -43.99 | -28.41 | -12.34 | 4.07   | 19.51  | 33.45  | 45.40  | 55.07  | 62.83  | 67.77  | 71.83  |
| 1.37 | -17.58 | -18.02 | -18.07 | -18.00 | -18.26 | -18.99 | -20.22 | -22.20 | -25.09 | -28.80 | -33.32 |
| 1.42 | -17.85 | -18.20 | -18.13 | -17.84 | -17.42 | -16.85 | -15.92 | -14.84 | -13.78 | -12.93 | -12.16 |
| 1.47 | -15.11 | -14.82 | -14.74 | -14.80 | -14.99 | -15.32 | -15.66 | -15.65 | -15.65 | -15.47 | -14.94 |
| 1.52 | -16.07 | -15.79 | -15.58 | -15.35 | -15.06 | -14.93 | -14.82 | -14.76 | -14.73 | -14.60 | -14.56 |
| 1.57 | -14.76 | -15.27 | -15.76 | -15.97 | -16.20 | -16.18 | -15.91 | -15.34 | -14.73 | -14.06 | -13.30 |
| 1.62 | -13.80 | -13.61 | -13.55 | -13.45 | -13.69 | -13.83 | -14.04 | -14.03 | -13.94 | -13.60 | -13.21 |
| 1.67 | -14.89 | -14.73 | -14.46 | -14.00 | -13.53 | -13.08 | -12.79 | -12.28 | -12.01 | -11.60 | -11.30 |
| 1.72 | -12.44 | -12.70 | -13.03 | -13.22 | -13.49 | -13.58 | -13.66 | -13.37 | -13.03 | -12.50 | -11.94 |
| 1.77 | -13.62 | -13.19 | -12.93 | -12.57 | -12.33 | -12.27 | -12.15 | -11.95 | -11.76 | -11.55 | -11.27 |
| 1.82 | -13.27 | -13.37 | -13.46 | -13.32 | -13.12 | -12.72 | -12.32 | -11.81 | -11.18 | -10.63 | -9.97  |
| 1.87 | -12.03 | -11.96 | -11.99 | -12.12 | -12.20 | -12.28 | -12.23 | -12.05 | -11.72 | -11.04 | -10.49 |
| 1.92 | -12.94 | -12.64 | -12.27 | -12.00 | -11.59 | -11.26 | -10.96 | -10.69 | -10.34 | -10.03 | -9.64  |
| 1.97 | -11.87 | -12.15 | -12.40 | -12.43 | -12.49 | -12.37 | -12.01 | -11.53 | -10.97 | -10.20 | -9.62  |
| 2.02 | -11.76 | -11.43 | -11.27 | -11.17 | -10.99 | -11.02 | -10.98 | -10.66 | -10.43 | -10.00 | -9.58  |
| 2.07 | -12.22 | -11.99 | -11.63 | -11.24 | -10.98 | -10.66 | -10.31 | -9.83  | -9.55  | -9.08  | -8.68  |
| 2.12 | -10.90 | -11.04 | -11.14 | -11.17 | -11.18 | -11.20 | -11.00 | -10.65 | -10.18 | -9.56  | -8.90  |
| 2.17 | -11.11 | -10.90 | -10.72 | -10.44 | -10.44 | -10.28 | -10.16 | -10.03 | -9.75  | -9.33  | -8.91  |
| 2.22 | -11.74 | -11.70 | -11.66 | -11.43 | -11.23 | -10.87 | -10.42 | -9.88  | -9.29  | -8.66  | -7.97  |
| 2.27 | -10.66 | -10.58 | -10.62 | -10.54 | -10.60 | -10.64 | -10.45 | -10.27 | -9.81  | -9.20  | -8.54  |
| 2.32 | -11.19 | -11.01 | -10.67 | -10.33 | -10.12 | -9.88  | -9.59  | -9.33  | -8.94  | -8.46  | -8.00  |
| 2.37 | -10.80 | -10.78 | -10.88 | -10.76 | -10.79 | -10.51 | -10.27 | -9.82  | -9.26  | -8.53  | -7.88  |
| 2.42 | -10.53 | -10.42 | -10.24 | -10.09 | -10.07 | -10.05 | -9.94  | -9.63  | -9.24  | -8.72  | -8.04  |
| 2.47 | -11.00 | -10.75 | -10.58 | -10.32 | -10.06 | -9.77  | -9.38  | -9.10  | -8.64  | -8.06  | -7.63  |
| 2.52 | -10.42 | -10.36 | -10.53 | -10.42 | -10.41 | -10.27 | -9.98  | -9.56  | -9.07  | -8.30  | -7.69  |
| 2.57 | -10.56 | -10.35 | -10.20 | -9.94  | -9.80  | -9.67  | -9.45  | -9.19  | -8.80  | -8.27  | -7.74  |
| 2.62 | -10.92 | -10.81 | -10.60 | -10.29 | -10.05 | -9.79  | -9.30  | -8.91  | -8.31  | -7.79  | -7.22  |
| 2.67 | -9.94  | -9.98  | -9.88  | -9.94  | -9.88  | -9.69  | -9.49  | -9.04  | -8.55  | -7.98  | -7.29  |
| 2.72 | -10.54 | -10.19 | -9.97  | -9.71  | -9.54  | -9.22  | -9.01  | -8.73  | -8.33  | -7.81  | -7.29  |

|       |        |        |        |       |       |       |       |       |       |       |       |
|-------|--------|--------|--------|-------|-------|-------|-------|-------|-------|-------|-------|
| 2.77  | -10.19 | -10.15 | -10.11 | -9.92 | -9.74 | -9.57 | -9.21 | -8.78 | -8.22 | -7.49 | -6.86 |
| 2.82  | -9.77  | -9.74  | -9.56  | -9.55 | -9.36 | -9.27 | -9.05 | -8.66 | -8.35 | -7.74 | -7.13 |
| 2.87  | -10.09 | -9.99  | -9.82  | -9.53 | -9.34 | -9.07 | -8.69 | -8.34 | -7.92 | -7.26 | -6.82 |
| 2.92  | -9.84  | -9.89  | -9.80  | -9.68 | -9.53 | -9.42 | -9.07 | -8.66 | -8.17 | -7.47 | -6.86 |
| 2.97  | -9.77  | -9.50  | -9.32  | -9.09 | -9.01 | -8.80 | -8.52 | -8.24 | -7.84 | -7.32 | -6.75 |
| 3.02  | -10.03 | -9.81  | -9.69  | -9.40 | -9.23 | -8.99 | -8.64 | -8.21 | -7.77 | -7.17 | -6.57 |
| 3.07  | -9.54  | -9.54  | -9.45  | -9.35 | -9.22 | -9.08 | -8.84 | -8.43 | -7.91 | -7.23 | -6.64 |
| 3.12  | -9.57  | -9.42  | -9.20  | -8.99 | -8.80 | -8.61 | -8.41 | -7.97 | -7.62 | -7.11 | -6.53 |
| 3.17  | -9.67  | -9.64  | -9.50  | -9.37 | -9.17 | -8.85 | -8.50 | -8.07 | -7.57 | -6.94 | -6.32 |
| 3.22  | -9.44  | -9.36  | -9.19  | -9.14 | -8.99 | -8.81 | -8.52 | -8.20 | -7.79 | -7.17 | -6.59 |
| 3.42  | -9.59  | -9.52  | -9.31  | -9.16 | -8.86 | -8.53 | -8.25 | -7.88 | -7.31 | -6.69 | -6.02 |
| 3.62  | -9.36  | -9.12  | -9.06  | -8.97 | -8.84 | -8.73 | -8.49 | -8.03 | -7.51 | -6.81 | -6.19 |
| 3.82  | -9.45  | -9.29  | -9.15  | -8.99 | -8.70 | -8.45 | -8.09 | -7.73 | -7.15 | -6.58 | -6.02 |
| 4.02  | -9.11  | -8.95  | -8.95  | -8.77 | -8.73 | -8.46 | -8.16 | -7.72 | -7.21 | -6.65 | -5.93 |
| 4.22  | -9.15  | -9.02  | -8.78  | -8.60 | -8.52 | -8.19 | -7.82 | -7.43 | -6.97 | -6.35 | -5.71 |
| 4.42  | -8.84  | -8.73  | -8.62  | -8.37 | -8.31 | -8.14 | -7.86 | -7.42 | -6.96 | -6.25 | -5.60 |
| 4.62  | -8.95  | -8.81  | -8.62  | -8.47 | -8.28 | -7.94 | -7.70 | -7.27 | -6.77 | -6.16 | -5.59 |
| 4.82  | -8.82  | -8.62  | -8.56  | -8.37 | -8.19 | -7.97 | -7.71 | -7.28 | -6.81 | -6.16 | -5.54 |
| 5.02  | -8.68  | -8.52  | -8.35  | -8.11 | -7.97 | -7.72 | -7.47 | -7.02 | -6.55 | -5.92 | -5.28 |
| 5.22  | -8.75  | -8.52  | -8.44  | -8.22 | -8.08 | -7.81 | -7.52 | -7.10 | -6.59 | -5.92 | -5.23 |
| 5.42  | -8.60  | -8.53  | -8.38  | -8.09 | -7.94 | -7.63 | -7.32 | -6.95 | -6.41 | -5.80 | -5.11 |
| 5.62  | -8.37  | -8.21  | -8.09  | -7.95 | -7.71 | -7.46 | -7.20 | -6.79 | -6.30 | -5.53 | -4.96 |
| 5.82  | -8.23  | -8.18  | -8.02  | -7.76 | -7.62 | -7.32 | -7.11 | -6.64 | -6.20 | -5.53 | -4.91 |
| 6.02  | -8.14  | -8.04  | -7.94  | -7.71 | -7.58 | -7.37 | -7.01 | -6.55 | -6.08 | -5.39 | -4.77 |
| 6.22  | -8.15  | -7.93  | -7.82  | -7.61 | -7.46 | -7.22 | -6.99 | -6.49 | -6.04 | -5.32 | -4.73 |
| 6.42  | -8.09  | -8.06  | -7.81  | -7.59 | -7.43 | -7.17 | -6.81 | -6.49 | -5.88 | -5.24 | -4.69 |
| 6.62  | -8.06  | -7.98  | -7.79  | -7.56 | -7.34 | -7.10 | -6.78 | -6.30 | -5.85 | -5.19 | -4.50 |
| 6.82  | -7.93  | -7.75  | -7.65  | -7.43 | -7.29 | -7.05 | -6.72 | -6.20 | -5.71 | -5.05 | -4.45 |
| 7.02  | -7.83  | -7.63  | -7.55  | -7.32 | -7.21 | -6.91 | -6.64 | -6.22 | -5.67 | -5.00 | -4.43 |
| 7.22  | -7.77  | -7.72  | -7.57  | -7.32 | -7.17 | -6.91 | -6.63 | -6.15 | -5.64 | -4.91 | -4.40 |
| 7.42  | -7.84  | -7.62  | -7.57  | -7.28 | -7.12 | -6.89 | -6.51 | -6.14 | -5.64 | -4.94 | -4.31 |
| 7.62  | -7.61  | -7.58  | -7.48  | -7.19 | -6.91 | -6.71 | -6.43 | -5.96 | -5.50 | -4.76 | -4.13 |
| 7.82  | -7.52  | -7.42  | -7.27  | -7.03 | -6.83 | -6.57 | -6.34 | -5.82 | -5.35 | -4.78 | -4.08 |
| 8.02  | -7.47  | -7.39  | -7.28  | -7.05 | -6.80 | -6.65 | -6.29 | -5.87 | -5.39 | -4.76 | -4.10 |
| 8.22  | -7.38  | -7.22  | -7.09  | -6.90 | -6.75 | -6.49 | -6.20 | -5.80 | -5.28 | -4.70 | -4.03 |
| 8.42  | -7.42  | -7.27  | -7.11  | -6.96 | -6.70 | -6.51 | -6.19 | -5.78 | -5.33 | -4.67 | -4.02 |
| 8.62  | -7.30  | -7.19  | -7.07  | -6.83 | -6.66 | -6.42 | -6.11 | -5.66 | -5.24 | -4.57 | -3.94 |
| 8.82  | -7.40  | -7.18  | -7.19  | -6.80 | -6.70 | -6.43 | -6.08 | -5.68 | -5.19 | -4.59 | -3.90 |
| 9.02  | -7.19  | -7.03  | -7.01  | -6.71 | -6.55 | -6.30 | -6.06 | -5.66 | -5.11 | -4.47 | -3.83 |
| 9.22  | -7.37  | -7.19  | -7.08  | -6.80 | -6.69 | -6.44 | -6.03 | -5.67 | -5.14 | -4.43 | -3.73 |
| 9.42  | -7.17  | -7.06  | -6.98  | -6.70 | -6.48 | -6.22 | -5.92 | -5.53 | -4.97 | -4.38 | -3.68 |
| 9.62  | -7.09  | -7.02  | -6.93  | -6.66 | -6.50 | -6.20 | -5.94 | -5.51 | -4.94 | -4.35 | -3.72 |
| 9.82  | -7.12  | -7.00  | -6.78  | -6.60 | -6.43 | -6.16 | -5.87 | -5.37 | -4.91 | -4.24 | -3.58 |
| 10.02 | -7.09  | -7.06  | -6.84  | -6.66 | -6.47 | -6.15 | -5.82 | -5.44 | -4.97 | -4.27 | -3.68 |
| 10.22 | -7.07  | -6.93  | -6.77  | -6.61 | -6.36 | -6.14 | -5.79 | -5.38 | -4.85 | -4.23 | -3.61 |
| 10.42 | -7.06  | -6.88  | -6.82  | -6.59 | -6.30 | -6.09 | -5.70 | -5.33 | -4.87 | -4.23 | -3.53 |
| 10.62 | -7.07  | -6.83  | -6.75  | -6.59 | -6.36 | -6.08 | -5.74 | -5.31 | -4.86 | -4.15 | -3.49 |
| 10.82 | -6.89  | -6.84  | -6.70  | -6.41 | -6.23 | -6.04 | -5.80 | -5.26 | -4.71 | -4.10 | -3.52 |
| 11.02 | -6.90  | -6.77  | -6.53  | -6.38 | -6.30 | -5.91 | -5.62 | -5.24 | -4.69 | -4.05 | -3.44 |
| 11.22 | -6.89  | -6.74  | -6.56  | -6.37 | -6.20 | -5.94 | -5.64 | -5.20 | -4.72 | -4.08 | -3.49 |

|       |       |       |       |       |       |       |       |       |       |       |       |
|-------|-------|-------|-------|-------|-------|-------|-------|-------|-------|-------|-------|
| 11.42 | -6.76 | -6.54 | -6.48 | -6.25 | -6.04 | -5.81 | -5.53 | -5.07 | -4.57 | -4.06 | -3.43 |
| 11.62 | -6.79 | -6.61 | -6.49 | -6.39 | -6.20 | -5.93 | -5.61 | -5.13 | -4.70 | -4.15 | -3.41 |
| 11.82 | -6.79 | -6.75 | -6.48 | -6.30 | -6.15 | -5.87 | -5.56 | -5.14 | -4.63 | -3.92 | -3.35 |
| 12.02 | -6.68 | -6.51 | -6.48 | -6.29 | -6.06 | -5.78 | -5.52 | -5.11 | -4.59 | -3.94 | -3.31 |
| 12.22 | -6.77 | -6.69 | -6.57 | -6.31 | -6.18 | -5.86 | -5.59 | -5.10 | -4.64 | -3.99 | -3.30 |
| 12.42 | -6.59 | -6.46 | -6.34 | -6.10 | -5.95 | -5.75 | -5.33 | -4.92 | -4.51 | -3.86 | -3.28 |
| 12.62 | -6.58 | -6.49 | -6.34 | -6.15 | -5.93 | -5.70 | -5.37 | -4.96 | -4.47 | -3.83 | -3.27 |
| 12.82 | -6.36 | -6.27 | -6.08 | -5.92 | -5.67 | -5.39 | -5.22 | -4.75 | -4.33 | -3.60 | -3.03 |
| 13.02 | -6.66 | -6.41 | -6.29 | -6.12 | -6.05 | -5.66 | -5.34 | -4.90 | -4.36 | -3.80 | -3.13 |
| 13.22 | -6.50 | -6.27 | -6.26 | -6.11 | -5.84 | -5.58 | -5.30 | -4.90 | -4.42 | -3.75 | -3.14 |
| 13.42 | -6.63 | -6.40 | -6.27 | -6.07 | -5.93 | -5.62 | -5.43 | -4.95 | -4.46 | -3.76 | -3.16 |
| 13.50 | -6.40 | -6.22 | -6.13 | -5.91 | -5.73 | -5.42 | -5.24 | -4.84 | -4.23 | -3.65 | -3.04 |
| 13.59 | -6.64 | -6.44 | -6.31 | -6.07 | -5.86 | -5.66 | -5.32 | -4.88 | -4.29 | -3.66 | -3.14 |
| 13.68 | -6.47 | -6.30 | -6.20 | -5.99 | -5.82 | -5.44 | -5.19 | -4.77 | -4.30 | -3.62 | -3.01 |
| 13.78 | -6.53 | -6.35 | -6.22 | -6.01 | -5.85 | -5.56 | -5.32 | -4.80 | -4.43 | -3.68 | -3.09 |
| 13.88 | -6.52 | -6.38 | -6.25 | -5.97 | -5.78 | -5.60 | -5.26 | -4.96 | -4.43 | -3.74 | -3.16 |
| 14.00 | -6.59 | -6.43 | -6.33 | -6.18 | -5.96 | -5.63 | -5.32 | -4.98 | -4.38 | -3.69 | -3.05 |
| 14.12 | -6.53 | -6.39 | -6.18 | -6.04 | -5.82 | -5.60 | -5.27 | -4.76 | -4.33 | -3.80 | -3.09 |
| 14.25 | -6.51 | -6.28 | -6.25 | -6.02 | -5.80 | -5.54 | -5.23 | -4.83 | -4.33 | -3.70 | -3.08 |
| 14.40 | -6.70 | -6.52 | -6.36 | -6.09 | -5.92 | -5.63 | -5.27 | -4.89 | -4.45 | -3.70 | -3.08 |
| 14.55 | -6.52 | -6.28 | -6.22 | -5.91 | -5.74 | -5.51 | -5.17 | -4.72 | -4.29 | -3.61 | -3.03 |
| 14.72 | -6.41 | -6.27 | -6.08 | -5.85 | -5.75 | -5.43 | -5.08 | -4.64 | -4.19 | -3.58 | -2.96 |
| 14.90 | -6.31 | -6.10 | -6.02 | -5.84 | -5.62 | -5.30 | -5.01 | -4.59 | -4.15 | -3.53 | -2.93 |
| 15.09 | -6.24 | -6.12 | -6.06 | -5.74 | -5.62 | -5.33 | -4.92 | -4.56 | -4.14 | -3.56 | -2.90 |
| 15.30 | -6.33 | -6.13 | -6.00 | -5.78 | -5.57 | -5.34 | -5.05 | -4.65 | -4.17 | -3.49 | -2.88 |
| 15.53 | -6.46 | -6.21 | -6.12 | -5.97 | -5.65 | -5.44 | -5.17 | -4.73 | -4.21 | -3.60 | -2.93 |
| 15.77 | -6.29 | -6.13 | -6.03 | -5.80 | -5.58 | -5.35 | -5.03 | -4.65 | -4.08 | -3.53 | -2.85 |
| 16.04 | -6.40 | -6.22 | -6.15 | -5.92 | -5.67 | -5.44 | -5.14 | -4.63 | -4.04 | -3.43 | -2.91 |
| 16.32 | -6.22 | -6.05 | -5.89 | -5.63 | -5.54 | -5.22 | -4.97 | -4.59 | -4.07 | -3.46 | -2.83 |
| 16.63 | -6.32 | -6.19 | -6.05 | -5.76 | -5.65 | -5.39 | -5.09 | -4.60 | -4.04 | -3.52 | -2.87 |
| 16.96 | -6.26 | -6.09 | -5.94 | -5.66 | -5.56 | -5.15 | -4.86 | -4.44 | -4.06 | -3.41 | -2.74 |
| 17.31 | -6.29 | -6.00 | -5.89 | -5.68 | -5.57 | -5.32 | -4.92 | -4.58 | -4.09 | -3.42 | -2.83 |
| 17.70 | -6.26 | -6.10 | -5.94 | -5.70 | -5.49 | -5.34 | -4.91 | -4.51 | -4.00 | -3.42 | -2.71 |
| 18.11 | -6.12 | -5.93 | -5.78 | -5.54 | -5.42 | -5.19 | -4.89 | -4.33 | -3.92 | -3.24 | -2.66 |
| 18.56 | -6.05 | -5.91 | -5.86 | -5.53 | -5.44 | -5.10 | -4.86 | -4.44 | -3.89 | -3.38 | -2.69 |
| 19.04 | -6.10 | -6.00 | -5.86 | -5.54 | -5.42 | -5.27 | -4.88 | -4.43 | -3.89 | -3.38 | -2.69 |
| 19.56 | -6.11 | -5.91 | -5.91 | -5.55 | -5.44 | -5.17 | -4.79 | -4.35 | -3.90 | -3.24 | -2.62 |
| 20.12 | -6.16 | -5.94 | -5.84 | -5.67 | -5.48 | -5.15 | -4.89 | -4.43 | -3.84 | -3.22 | -2.53 |
| 20.72 | -6.20 | -6.03 | -5.79 | -5.64 | -5.39 | -5.12 | -4.84 | -4.31 | -3.89 | -3.15 | -2.59 |
| 21.37 | -6.11 | -5.88 | -5.70 | -5.53 | -5.38 | -5.08 | -4.74 | -4.32 | -3.82 | -3.16 | -2.49 |
| 22.08 | -6.16 | -6.04 | -5.92 | -5.65 | -5.53 | -5.17 | -4.89 | -4.45 | -3.83 | -3.19 | -2.66 |
| 22.84 | -6.18 | -6.04 | -5.90 | -5.55 | -5.44 | -5.23 | -4.89 | -4.39 | -3.88 | -3.25 | -2.60 |
| 23.65 | -6.07 | -5.88 | -5.69 | -5.61 | -5.29 | -5.05 | -4.71 | -4.31 | -3.72 | -3.08 | -2.54 |
| 24.54 | -5.89 | -5.66 | -5.69 | -5.40 | -5.21 | -4.90 | -4.59 | -4.15 | -3.69 | -3.05 | -2.35 |
| 25.49 | -6.04 | -5.87 | -5.71 | -5.51 | -5.24 | -4.92 | -4.65 | -4.19 | -3.75 | -2.98 | -2.31 |
| 26.51 | -5.85 | -5.64 | -5.56 | -5.20 | -5.07 | -4.78 | -4.57 | -4.11 | -3.65 | -2.97 | -2.34 |
| 27.62 | -5.88 | -5.73 | -5.59 | -5.35 | -5.14 | -4.84 | -4.51 | -4.04 | -3.67 | -2.86 | -2.24 |
| 28.81 | -5.87 | -5.68 | -5.57 | -5.43 | -5.11 | -4.85 | -4.46 | -4.05 | -3.56 | -2.91 | -2.22 |
| 30.10 | -5.74 | -5.52 | -5.36 | -5.23 | -5.01 | -4.66 | -4.38 | -3.93 | -3.55 | -2.81 | -2.21 |
| 31.49 | -5.77 | -5.54 | -5.45 | -5.19 | -4.91 | -4.67 | -4.31 | -3.90 | -3.43 | -2.75 | -2.08 |

|        |       |       |       |       |       |       |       |       |       |       |       |
|--------|-------|-------|-------|-------|-------|-------|-------|-------|-------|-------|-------|
| 32.98  | -5.70 | -5.59 | -5.40 | -5.19 | -5.00 | -4.70 | -4.31 | -3.90 | -3.42 | -2.73 | -2.03 |
| 34.60  | -5.70 | -5.48 | -5.31 | -5.03 | -4.88 | -4.56 | -4.28 | -3.83 | -3.33 | -2.64 | -1.91 |
| 36.34  | -5.71 | -5.48 | -5.37 | -5.12 | -4.93 | -4.55 | -4.24 | -3.79 | -3.26 | -2.65 | -2.02 |
| 38.21  | -5.59 | -5.38 | -5.20 | -4.91 | -4.75 | -4.46 | -4.15 | -3.70 | -3.18 | -2.49 | -1.75 |
| 40.24  | -5.62 | -5.39 | -5.34 | -4.99 | -4.89 | -4.55 | -4.24 | -3.76 | -3.16 | -2.51 | -1.87 |
| 42.42  | -5.49 | -5.21 | -5.10 | -4.87 | -4.72 | -4.38 | -4.05 | -3.60 | -3.12 | -2.48 | -1.73 |
| 44.78  | -5.53 | -5.42 | -5.23 | -5.02 | -4.79 | -4.51 | -4.11 | -3.66 | -3.15 | -2.43 | -1.82 |
| 47.32  | -5.48 | -5.23 | -5.07 | -4.80 | -4.55 | -4.33 | -3.96 | -3.59 | -3.11 | -2.48 | -1.73 |
| 50.06  | -5.49 | -5.29 | -5.17 | -4.90 | -4.72 | -4.44 | -4.05 | -3.60 | -2.98 | -2.38 | -1.75 |
| 53.01  | -5.65 | -5.24 | -5.18 | -4.89 | -4.68 | -4.39 | -4.03 | -3.54 | -3.09 | -2.37 | -1.75 |
| 56.20  | -5.44 | -5.27 | -5.02 | -4.83 | -4.61 | -4.22 | -3.98 | -3.48 | -2.94 | -2.22 | -1.60 |
| 59.64  | -5.44 | -5.23 | -5.06 | -4.86 | -4.53 | -4.22 | -3.81 | -3.37 | -2.91 | -2.22 | -1.46 |
| 63.34  | -5.31 | -5.04 | -4.89 | -4.69 | -4.41 | -4.10 | -3.81 | -3.26 | -2.85 | -2.04 | -1.51 |
| 67.34  | -5.37 | -5.16 | -4.99 | -4.70 | -4.53 | -4.16 | -3.80 | -3.35 | -2.78 | -2.18 | -1.45 |
| 71.65  | -5.38 | -5.14 | -4.91 | -4.66 | -4.43 | -4.11 | -3.76 | -3.28 | -2.69 | -2.00 | -1.42 |
| 76.30  | -5.45 | -5.13 | -5.03 | -4.81 | -4.53 | -4.20 | -3.76 | -3.29 | -2.78 | -2.03 | -1.30 |
| 81.32  | -5.24 | -5.13 | -4.92 | -4.61 | -4.36 | -4.07 | -3.69 | -3.14 | -2.55 | -2.02 | -1.15 |
| 86.73  | -5.38 | -5.07 | -4.82 | -4.54 | -4.33 | -3.93 | -3.63 | -3.08 | -2.43 | -1.76 | -1.03 |
| 92.56  | -5.20 | -5.00 | -4.82 | -4.47 | -4.21 | -3.87 | -3.46 | -2.98 | -2.33 | -1.68 | -0.98 |
| 98.85  | -5.17 | -4.93 | -4.79 | -4.49 | -4.17 | -3.78 | -3.41 | -2.95 | -2.46 | -1.66 | -0.94 |
| 105.64 | -5.13 | -4.88 | -4.70 | -4.45 | -4.17 | -3.83 | -3.36 | -2.90 | -2.32 | -1.58 | -0.82 |
| 112.96 | -5.22 | -4.96 | -4.73 | -4.36 | -4.05 | -3.72 | -3.35 | -2.76 | -2.19 | -1.54 | -0.79 |
| 120.85 | -4.84 | -4.72 | -4.45 | -4.10 | -3.77 | -3.52 | -3.06 | -2.46 | -1.93 | -1.15 | -0.53 |
| 129.36 | -5.17 | -4.85 | -4.61 | -4.30 | -4.06 | -3.61 | -3.17 | -2.66 | -1.98 | -1.28 | -0.49 |
| 138.55 | -4.86 | -4.65 | -4.41 | -4.18 | -3.89 | -3.35 | -3.06 | -2.47 | -1.85 | -1.12 | -0.33 |
| 148.45 | -4.90 | -4.60 | -4.36 | -4.10 | -3.77 | -3.33 | -2.87 | -2.49 | -1.80 | -1.05 | -0.22 |
| 159.13 | -4.89 | -4.64 | -4.37 | -4.00 | -3.78 | -3.34 | -2.92 | -2.32 | -1.73 | -0.92 | -0.16 |
| 170.65 | -4.71 | -4.49 | -4.24 | -3.93 | -3.58 | -3.20 | -2.74 | -2.21 | -1.59 | -0.70 | -0.04 |
| 183.07 | -4.72 | -4.36 | -4.09 | -3.78 | -3.46 | -3.11 | -2.57 | -2.04 | -1.38 | -0.64 | 0.23  |
| 196.47 | -4.64 | -4.33 | -4.14 | -3.76 | -3.46 | -3.02 | -2.59 | -1.95 | -1.29 | -0.45 | 0.26  |
| 210.91 | -4.49 | -4.19 | -3.89 | -3.61 | -3.24 | -2.80 | -2.36 | -1.76 | -1.15 | -0.24 | 0.51  |
| 226.50 | -4.42 | -4.12 | -3.84 | -3.49 | -3.10 | -2.66 | -2.20 | -1.68 | -0.97 | -0.10 | 0.72  |
| 243.31 | -4.40 | -4.10 | -3.72 | -3.42 | -3.09 | -2.56 | -2.09 | -1.50 | -0.84 | -0.02 | 0.74  |
| 261.43 | -4.31 | -4.10 | -3.79 | -3.45 | -3.03 | -2.52 | -2.05 | -1.37 | -0.71 | 0.15  | 0.87  |
| 280.98 | -4.14 | -3.89 | -3.58 | -3.21 | -2.80 | -2.34 | -1.85 | -1.18 | -0.51 | 0.31  | 1.12  |
| 302.07 | -4.05 | -3.75 | -3.46 | -3.03 | -2.60 | -2.26 | -1.68 | -1.10 | -0.31 | 0.48  | 1.32  |
| 324.81 | -4.01 | -3.63 | -3.35 | -2.96 | -2.61 | -2.00 | -1.54 | -0.94 | -0.15 | 0.64  | 1.53  |
| 349.33 | -3.98 | -3.58 | -3.28 | -2.85 | -2.39 | -1.94 | -1.52 | -0.75 | 0.06  | 0.77  | 1.66  |
| 375.79 | -3.90 | -3.55 | -3.22 | -2.77 | -2.26 | -1.86 | -1.32 | -0.76 | 0.07  | 0.96  | 1.78  |
| 404.31 | -3.68 | -3.26 | -3.00 | -2.47 | -2.18 | -1.62 | -1.11 | -0.54 | 0.29  | 1.15  | 1.98  |
| 435.08 | -3.83 | -3.40 | -3.05 | -2.66 | -2.19 | -1.67 | -1.07 | -0.41 | 0.30  | 1.21  | 2.06  |
| 468.27 | -3.67 | -3.30 | -2.90 | -2.48 | -2.05 | -1.45 | -0.90 | -0.26 | 0.45  | 1.36  | 2.31  |
| 504.06 | -3.56 | -3.17 | -2.76 | -2.30 | -1.86 | -1.27 | -0.79 | -0.05 | 0.78  | 1.66  | 2.58  |
| 542.66 | -3.43 | -3.01 | -2.71 | -2.23 | -1.75 | -1.15 | -0.59 | 0.06  | 0.82  | 1.65  | 2.60  |
| 584.29 | -3.38 | -2.93 | -2.59 | -2.16 | -1.70 | -1.13 | -0.52 | 0.11  | 1.05  | 1.93  | 2.77  |
| 629.18 | -3.18 | -2.84 | -2.44 | -1.96 | -1.50 | -0.90 | -0.34 | 0.36  | 1.17  | 2.08  | 2.90  |
| 677.61 | -3.20 | -2.96 | -2.49 | -1.94 | -1.51 | -0.91 | -0.34 | 0.44  | 1.23  | 2.09  | 3.09  |
| 729.83 | -2.98 | -2.57 | -2.24 | -1.70 | -1.24 | -0.66 | -0.03 | 0.62  | 1.46  | 2.37  | 3.33  |
| 786.16 | -3.03 | -2.66 | -2.18 | -1.73 | -1.26 | -0.67 | 0.05  | 0.68  | 1.49  | 2.40  | 3.41  |
| 846.90 | -2.97 | -2.59 | -2.15 | -1.58 | -1.06 | -0.61 | -0.03 | 0.79  | 1.59  | 2.57  | 3.40  |

|         |       |       |       |       |       |       |       |      |      |      |      |
|---------|-------|-------|-------|-------|-------|-------|-------|------|------|------|------|
| 912.42  | -2.85 | -2.40 | -2.12 | -1.58 | -1.01 | -0.53 | 0.12  | 0.88 | 1.64 | 2.67 | 3.60 |
| 983.08  | -2.81 | -2.40 | -2.01 | -1.51 | -0.91 | -0.48 | 0.22  | 0.95 | 1.77 | 2.65 | 3.65 |
| 1059.29 | -2.93 | -2.46 | -2.10 | -1.63 | -1.01 | -0.46 | 0.20  | 0.94 | 1.76 | 2.74 | 3.62 |
| 1141.48 | -2.82 | -2.39 | -1.88 | -1.43 | -0.87 | -0.28 | 0.34  | 1.08 | 1.93 | 2.89 | 3.70 |
| 1230.13 | -2.79 | -2.36 | -1.96 | -1.48 | -0.90 | -0.37 | 0.23  | 1.02 | 1.85 | 2.86 | 3.77 |
| 1325.73 | -2.88 | -2.42 | -2.05 | -1.46 | -0.92 | -0.38 | 0.29  | 1.13 | 1.92 | 2.78 | 3.78 |
| 1428.84 | -2.89 | -2.49 | -2.01 | -1.44 | -0.95 | -0.39 | 0.20  | 0.98 | 1.78 | 2.82 | 3.72 |
| 1540.05 | -2.94 | -2.46 | -2.03 | -1.48 | -0.94 | -0.32 | 0.27  | 1.02 | 1.86 | 2.79 | 3.83 |
| 1659.99 | -2.94 | -2.41 | -2.07 | -1.47 | -0.96 | -0.33 | 0.19  | 1.05 | 1.93 | 2.84 | 3.84 |
| 1789.34 | -2.93 | -2.37 | -2.14 | -1.50 | -0.94 | -0.38 | 0.26  | 1.06 | 1.99 | 2.90 | 3.86 |
| 1928.85 | -2.91 | -2.59 | -2.05 | -1.52 | -0.97 | -0.46 | 0.20  | 1.07 | 1.98 | 2.87 | 3.82 |
| 2079.31 | -3.08 | -2.57 | -2.15 | -1.65 | -1.07 | -0.43 | 0.20  | 0.97 | 1.82 | 2.83 | 3.82 |
| 2241.59 | -3.03 | -2.59 | -2.11 | -1.56 | -1.04 | -0.35 | 0.18  | 1.00 | 1.84 | 2.81 | 3.80 |
| 2416.60 | -3.23 | -2.75 | -2.25 | -1.76 | -1.18 | -0.60 | 0.10  | 0.88 | 1.73 | 2.75 | 3.73 |
| 2605.36 | -3.22 | -2.70 | -2.28 | -1.74 | -1.15 | -0.51 | 0.17  | 0.89 | 1.69 | 2.80 | 3.72 |
| 2808.94 | -3.33 | -2.74 | -2.38 | -1.76 | -1.22 | -0.59 | 0.02  | 0.88 | 1.77 | 2.73 | 3.72 |
| 3028.50 | -3.23 | -2.85 | -2.34 | -1.74 | -1.22 | -0.68 | -0.08 | 0.86 | 1.76 | 2.73 | 3.68 |
| 3265.30 | -3.30 | -2.72 | -2.33 | -1.87 | -1.16 | -0.67 | 0.03  | 0.76 | 1.68 | 2.65 | 3.68 |
| 3520.69 | -3.27 | -2.76 | -2.43 | -1.88 | -1.21 | -0.58 | -0.02 | 0.84 | 1.62 | 2.60 | 3.67 |
| 3796.13 | -3.40 | -2.81 | -2.37 | -1.70 | -1.29 | -0.69 | 0.00  | 0.86 | 1.69 | 2.74 | 3.69 |

| Wavelength (nm) \ Time (ps) | 537.73 | 539.15 | 540.58 | 542.00 | 543.43 | 544.85 | 546.27 | 547.70 | 549.12 | 550.55 | 551.97 |
|-----------------------------|--------|--------|--------|--------|--------|--------|--------|--------|--------|--------|--------|
| -3.78                       | 0.04   | 0.01   | 0.01   | 0.03   | -0.06  | 0.01   | 0.03   | 0.00   | 0.03   | 0.02   | -0.02  |
| -3.28                       | 0.03   | 0.07   | -0.01  | -0.04  | 0.02   | -0.01  | 0.05   | 0.07   | 0.00   | -0.01  | 0.04   |
| -2.78                       | -0.04  | -0.03  | 0.00   | 0.06   | -0.01  | 0.05   | -0.07  | 0.04   | 0.06   | 0.05   | -0.02  |
| -2.28                       | 0.01   | 0.01   | 0.06   | 0.00   | 0.04   | -0.01  | 0.03   | 0.05   | 0.00   | 0.02   | 0.05   |
| -1.78                       | 0.00   | 0.00   | -0.03  | -0.01  | 0.02   | 0.00   | 0.04   | -0.08  | 0.05   | -0.04  | 0.02   |
| -1.28                       | -0.03  | -0.08  | -0.05  | -0.06  | -0.02  | -0.04  | -0.02  | 0.00   | -0.09  | 0.02   | -0.03  |
| -0.78                       | 0.01   | 0.07   | 0.02   | -0.01  | 0.02   | -0.01  | 0.01   | -0.07  | -0.03  | -0.02  | -0.03  |
| -0.28                       | -0.02  | -0.06  | 0.01   | 0.04   | -0.02  | 0.01   | -0.05  | -0.01  | -0.02  | -0.06  | 0.00   |
| -0.18                       | 0.04   | 0.03   | -0.01  | 0.00   | 0.03   | 0.08   | 0.06   | -0.01  | 0.01   | 0.03   | 0.08   |
| -0.08                       | 0.02   | 0.04   | -0.07  | -0.05  | -0.01  | -0.03  | -0.01  | 0.02   | -0.07  | 0.04   | -0.11  |
| 0.02                        | 0.03   | -0.04  | -0.02  | 0.03   | 0.04   | 0.07   | 0.04   | -0.03  | 0.05   | 0.06   | 0.03   |
| 0.12                        | 0.04   | 0.01   | -0.06  | -0.02  | -0.04  | 0.02   | 0.04   | 0.02   | 0.05   | 0.08   | 0.02   |
| 0.22                        | -0.02  | -0.04  | 0.00   | -0.03  | 0.09   | 0.03   | 0.00   | 0.01   | 0.05   | 0.03   | 0.03   |
| 0.27                        | -0.02  | -0.02  | -0.03  | -0.04  | -0.07  | 0.00   | -0.02  | 0.00   | 0.02   | -0.05  | -0.04  |
| 0.32                        | 0.07   | 0.02   | 0.03   | 0.05   | 0.00   | 0.04   | -0.02  | 0.04   | 0.00   | -0.01  | -0.03  |
| 0.37                        | 0.02   | -0.07  | -0.04  | -0.02  | -0.07  | 0.03   | 0.04   | 0.02   | 0.07   | -0.05  | -0.10  |
| 0.42                        | -0.04  | -0.16  | -0.18  | -0.06  | -0.13  | 0.01   | -0.07  | 0.00   | -0.08  | -0.11  | -0.05  |
| 0.47                        | -0.07  | 0.01   | 0.04   | -0.05  | 0.01   | 0.06   | 0.01   | -0.06  | -0.02  | -0.02  | -0.03  |
| 0.52                        | -0.04  | -0.08  | -0.07  | -0.06  | 0.07   | -0.02  | 0.08   | -0.03  | -0.04  | -0.02  | 0.02   |
| 0.57                        | 0.03   | -0.07  | 0.03   | 0.03   | 0.00   | 0.09   | 0.06   | 0.03   | -0.01  | -0.01  | 0.00   |
| 0.62                        | -0.04  | 0.00   | 0.02   | -0.04  | 0.08   | -0.01  | 0.05   | -0.06  | -0.04  | -0.03  | -0.05  |
| 0.67                        | 0.04   | -0.04  | -0.11  | 0.00   | 0.00   | -0.03  | 0.08   | -0.03  | 0.06   | 0.02   | 0.02   |
| 0.72                        | -0.15  | -0.02  | -0.13  | -0.02  | -0.10  | -0.05  | -0.02  | 0.03   | -0.07  | -0.01  | -0.10  |
| 0.77                        | -0.02  | -0.05  | -0.08  | 0.02   | 0.03   | -0.06  | 0.03   | 0.02   | -0.03  | -0.05  | 0.01   |
| 0.82                        | -0.04  | 0.03   | 0.02   | -0.07  | -0.09  | -0.01  | 0.05   | 0.01   | -0.04  | -0.06  | -0.01  |



|      |        |        |        |        |        |        |        |        |        |        |        |
|------|--------|--------|--------|--------|--------|--------|--------|--------|--------|--------|--------|
| 0.87 | 0.04   | 0.01   | -0.03  | -0.08  | -0.10  | 0.00   | -0.03  | -0.07  | -0.04  | -0.01  | 0.00   |
| 0.92 | 0.01   | 0.01   | -0.11  | -0.03  | -0.02  | -0.01  | 0.04   | -0.03  | -0.06  | 0.01   | -0.04  |
| 0.97 | -0.03  | -0.01  | -0.09  | -0.02  | -0.01  | -0.03  | 0.01   | -0.05  | -0.04  | -0.04  | -0.01  |
| 1.02 | -0.10  | -0.05  | -0.04  | 0.01   | 0.04   | 0.04   | 0.05   | 0.00   | 0.05   | 0.00   | 0.01   |
| 1.07 | 0.00   | 0.02   | -0.08  | -0.07  | -0.02  | -0.04  | 0.01   | -0.02  | -0.04  | 0.01   | 0.05   |
| 1.12 | -0.04  | -0.08  | -0.14  | 0.03   | 0.04   | -0.04  | -0.04  | 0.01   | 0.08   | 0.01   | -0.09  |
| 1.17 | 0.19   | 0.15   | 0.18   | 0.09   | 0.05   | -0.02  | -0.06  | 0.01   | -0.03  | -0.01  | 0.07   |
| 1.22 | -0.74  | -1.62  | -1.97  | -1.89  | -1.48  | -1.06  | -0.58  | -0.21  | -0.02  | 0.19   | 0.24   |
| 1.27 | -22.81 | -25.69 | -28.64 | -31.29 | -33.78 | -36.10 | -37.05 | -36.99 | -35.60 | -32.64 | -28.50 |
| 1.32 | 74.00  | 74.92  | 74.22  | 73.93  | 72.47  | 68.82  | 65.79  | 61.36  | 56.08  | 50.93  | 45.47  |
| 1.37 | -38.49 | -44.17 | -49.78 | -55.35 | -60.07 | -64.01 | -66.22 | -66.85 | -65.76 | -62.18 | -56.66 |
| 1.42 | -11.31 | -10.50 | -9.62  | -8.81  | -7.96  | -7.12  | -6.50  | -6.09  | -5.87  | -5.81  | -5.89  |
| 1.47 | -14.48 | -13.73 | -12.88 | -11.94 | -11.06 | -10.11 | -9.08  | -8.19  | -7.29  | -6.31  | -5.38  |
| 1.52 | -14.25 | -13.93 | -13.55 | -12.78 | -11.99 | -11.11 | -10.05 | -8.94  | -7.78  | -6.46  | -5.19  |
| 1.57 | -12.41 | -11.50 | -10.68 | -9.88  | -9.03  | -8.21  | -7.49  | -6.55  | -5.79  | -4.98  | -4.06  |
| 1.62 | -12.55 | -11.82 | -10.84 | -10.03 | -8.89  | -7.88  | -6.83  | -5.93  | -4.94  | -4.18  | -3.31  |
| 1.67 | -10.92 | -10.39 | -9.94  | -9.28  | -8.58  | -7.79  | -6.90  | -6.02  | -4.96  | -3.98  | -2.92  |
| 1.72 | -11.07 | -10.25 | -9.42  | -8.54  | -7.69  | -6.85  | -6.04  | -5.26  | -4.43  | -3.65  | -2.89  |
| 1.77 | -10.79 | -10.17 | -9.40  | -8.57  | -7.54  | -6.62  | -5.40  | -4.30  | -3.26  | -2.11  | -1.13  |
| 1.82 | -9.39  | -8.63  | -7.98  | -7.32  | -6.71  | -5.85  | -5.19  | -4.32  | -3.47  | -2.66  | -1.78  |
| 1.87 | -9.58  | -8.71  | -7.70  | -6.67  | -5.76  | -4.67  | -3.78  | -2.87  | -2.00  | -1.09  | -0.26  |
| 1.92 | -9.24  | -8.71  | -8.05  | -7.29  | -6.58  | -5.64  | -4.60  | -3.58  | -2.58  | -1.50  | -0.50  |
| 1.97 | -8.71  | -7.83  | -7.07  | -6.25  | -5.32  | -4.39  | -3.62  | -2.74  | -1.80  | -0.93  | 0.05   |
| 2.02 | -8.87  | -8.16  | -7.20  | -6.21  | -5.31  | -4.18  | -3.16  | -2.11  | -1.09  | -0.20  | 0.78   |
| 2.07 | -8.20  | -7.51  | -6.85  | -5.99  | -5.25  | -4.25  | -3.18  | -2.25  | -1.12  | -0.16  | 0.90   |
| 2.12 | -8.11  | -7.27  | -6.36  | -5.51  | -4.60  | -3.46  | -2.58  | -1.74  | -0.81  | 0.10   | 0.91   |
| 2.17 | -8.25  | -7.48  | -6.61  | -5.72  | -4.72  | -3.59  | -2.61  | -1.58  | -0.50  | 0.51   | 1.48   |
| 2.22 | -7.30  | -6.56  | -5.76  | -4.98  | -4.10  | -3.30  | -2.33  | -1.53  | -0.55  | 0.47   | 1.55   |
| 2.27 | -7.75  | -6.90  | -5.82  | -4.93  | -3.89  | -2.76  | -1.85  | -0.89  | 0.05   | 1.08   | 1.97   |
| 2.32 | -7.45  | -6.74  | -5.96  | -5.15  | -4.15  | -3.17  | -2.13  | -1.16  | -0.05  | 1.00   | 2.04   |
| 2.37 | -7.09  | -6.24  | -5.29  | -4.44  | -3.65  | -2.63  | -1.69  | -0.79  | 0.20   | 1.12   | 2.08   |
| 2.42 | -7.27  | -6.39  | -5.50  | -4.46  | -3.42  | -2.30  | -1.29  | -0.27  | 0.73   | 1.58   | 2.56   |
| 2.47 | -6.99  | -6.22  | -5.45  | -4.59  | -3.71  | -2.65  | -1.59  | -0.59  | 0.54   | 1.59   | 2.58   |
| 2.52 | -6.86  | -6.05  | -5.01  | -4.05  | -3.15  | -2.05  | -1.15  | -0.19  | 0.86   | 1.77   | 2.83   |
| 2.57 | -7.02  | -6.20  | -5.20  | -4.24  | -3.24  | -2.04  | -1.01  | 0.04   | 1.19   | 2.14   | 3.17   |
| 2.62 | -6.47  | -5.77  | -4.87  | -4.02  | -3.15  | -2.05  | -1.11  | -0.14  | 0.99   | 1.95   | 3.03   |
| 2.67 | -6.51  | -5.59  | -4.70  | -3.70  | -2.82  | -1.72  | -0.75  | 0.17   | 1.28   | 2.15   | 3.16   |
| 2.72 | -6.54  | -5.88  | -4.96  | -4.02  | -3.03  | -1.96  | -0.84  | 0.18   | 1.27   | 2.35   | 3.48   |
| 2.77 | -6.03  | -5.33  | -4.31  | -3.56  | -2.62  | -1.57  | -0.60  | 0.47   | 1.49   | 2.41   | 3.40   |
| 2.82 | -6.34  | -5.50  | -4.49  | -3.56  | -2.51  | -1.45  | -0.44  | 0.62   | 1.71   | 2.67   | 3.61   |
| 2.87 | -6.00  | -5.23  | -4.40  | -3.53  | -2.56  | -1.56  | -0.50  | 0.58   | 1.65   | 2.70   | 3.71   |
| 2.92 | -5.98  | -5.06  | -4.15  | -3.24  | -2.30  | -1.29  | -0.26  | 0.82   | 1.89   | 2.89   | 3.86   |
| 2.97 | -5.96  | -5.16  | -4.23  | -3.19  | -2.34  | -1.08  | -0.09  | 1.01   | 2.07   | 3.13   | 4.14   |
| 3.02 | -5.86  | -5.02  | -4.15  | -3.33  | -2.42  | -1.35  | -0.22  | 0.76   | 1.86   | 2.94   | 4.03   |
| 3.07 | -5.81  | -4.98  | -3.97  | -3.12  | -2.04  | -0.90  | 0.04   | 1.09   | 2.16   | 3.13   | 4.13   |
| 3.12 | -5.81  | -5.01  | -4.17  | -3.17  | -2.19  | -1.14  | -0.07  | 1.04   | 2.16   | 3.18   | 4.23   |
| 3.17 | -5.54  | -4.69  | -3.86  | -2.92  | -1.94  | -0.90  | 0.11   | 1.10   | 2.24   | 3.25   | 4.30   |
| 3.22 | -5.82  | -4.91  | -3.92  | -2.97  | -1.92  | -0.79  | 0.28   | 1.35   | 2.44   | 3.46   | 4.49   |
| 3.42 | -5.33  | -4.54  | -3.56  | -2.74  | -1.71  | -0.58  | 0.38   | 1.53   | 2.54   | 3.69   | 4.83   |
| 3.62 | -5.35  | -4.48  | -3.52  | -2.53  | -1.56  | -0.43  | 0.73   | 1.81   | 2.74   | 3.95   | 4.97   |

|       |       |       |       |       |       |       |      |      |      |      |      |
|-------|-------|-------|-------|-------|-------|-------|------|------|------|------|------|
| 3.82  | -5.22 | -4.38 | -3.49 | -2.55 | -1.46 | -0.42 | 0.59 | 1.67 | 2.83 | 3.96 | 5.00 |
| 4.02  | -5.11 | -4.21 | -3.26 | -2.34 | -1.22 | -0.24 | 0.93 | 2.07 | 3.15 | 4.19 | 5.33 |
| 4.22  | -4.93 | -4.09 | -3.13 | -2.23 | -1.20 | -0.13 | 0.94 | 1.98 | 3.11 | 4.25 | 5.33 |
| 4.42  | -4.85 | -3.96 | -2.98 | -2.07 | -0.98 | 0.02  | 1.14 | 2.13 | 3.32 | 4.46 | 5.50 |
| 4.62  | -4.72 | -3.90 | -3.04 | -2.02 | -1.02 | 0.18  | 1.25 | 2.45 | 3.53 | 4.68 | 5.76 |
| 4.82  | -4.70 | -3.87 | -2.88 | -1.91 | -0.93 | 0.21  | 1.35 | 2.38 | 3.56 | 4.61 | 5.71 |
| 5.02  | -4.46 | -3.62 | -2.70 | -1.75 | -0.67 | 0.45  | 1.51 | 2.60 | 3.75 | 4.87 | 6.00 |
| 5.22  | -4.41 | -3.61 | -2.63 | -1.63 | -0.61 | 0.46  | 1.51 | 2.69 | 3.77 | 4.96 | 6.03 |
| 5.42  | -4.35 | -3.46 | -2.58 | -1.50 | -0.48 | 0.63  | 1.71 | 2.83 | 3.94 | 4.99 | 6.15 |
| 5.62  | -4.17 | -3.31 | -2.27 | -1.34 | -0.31 | 0.75  | 1.88 | 3.04 | 4.18 | 5.17 | 6.35 |
| 5.82  | -4.11 | -3.22 | -2.30 | -1.33 | -0.29 | 0.92  | 1.86 | 2.95 | 4.15 | 5.32 | 6.48 |
| 6.02  | -4.00 | -3.10 | -2.20 | -1.17 | -0.16 | 0.97  | 2.13 | 3.18 | 4.30 | 5.45 | 6.60 |
| 6.22  | -3.95 | -3.10 | -2.14 | -1.14 | -0.09 | 1.12  | 2.05 | 3.25 | 4.39 | 5.45 | 6.61 |
| 6.42  | -3.82 | -3.02 | -1.90 | -1.04 | -0.01 | 1.14  | 2.28 | 3.37 | 4.46 | 5.55 | 6.73 |
| 6.62  | -3.77 | -2.84 | -1.86 | -0.85 | 0.19  | 1.31  | 2.42 | 3.50 | 4.67 | 5.80 | 7.02 |
| 6.82  | -3.69 | -2.79 | -1.83 | -0.79 | 0.29  | 1.34  | 2.47 | 3.55 | 4.65 | 5.79 | 6.88 |
| 7.02  | -3.64 | -2.68 | -1.76 | -0.66 | 0.23  | 1.42  | 2.50 | 3.65 | 4.79 | 5.93 | 7.05 |
| 7.22  | -3.55 | -2.65 | -1.64 | -0.67 | 0.29  | 1.47  | 2.61 | 3.64 | 4.89 | 5.99 | 7.11 |
| 7.42  | -3.49 | -2.56 | -1.63 | -0.58 | 0.35  | 1.56  | 2.65 | 3.81 | 4.98 | 6.11 | 7.23 |
| 7.62  | -3.38 | -2.55 | -1.47 | -0.54 | 0.37  | 1.62  | 2.63 | 3.88 | 4.99 | 6.14 | 7.17 |
| 7.82  | -3.29 | -2.47 | -1.50 | -0.44 | 0.51  | 1.71  | 2.74 | 3.88 | 5.10 | 6.18 | 7.34 |
| 8.02  | -3.34 | -2.45 | -1.45 | -0.48 | 0.54  | 1.63  | 2.74 | 3.84 | 5.01 | 6.21 | 7.25 |
| 8.22  | -3.20 | -2.44 | -1.48 | -0.50 | 0.62  | 1.69  | 2.81 | 3.90 | 5.01 | 6.14 | 7.21 |
| 8.42  | -3.18 | -2.35 | -1.47 | -0.50 | 0.63  | 1.74  | 2.75 | 3.91 | 5.02 | 6.13 | 7.25 |
| 8.62  | -3.11 | -2.15 | -1.25 | -0.25 | 0.72  | 1.76  | 2.92 | 4.03 | 5.16 | 6.30 | 7.48 |
| 8.82  | -2.99 | -2.23 | -1.20 | -0.30 | 0.89  | 1.99  | 3.00 | 4.18 | 5.41 | 6.46 | 7.60 |
| 9.02  | -3.03 | -2.22 | -1.22 | -0.27 | 0.76  | 1.92  | 2.97 | 4.01 | 5.16 | 6.26 | 7.37 |
| 9.22  | -3.00 | -2.17 | -1.28 | -0.24 | 0.80  | 1.94  | 3.00 | 4.14 | 5.31 | 6.41 | 7.50 |
| 9.42  | -2.92 | -2.08 | -1.12 | -0.07 | 0.96  | 2.06  | 3.17 | 4.27 | 5.50 | 6.51 | 7.69 |
| 9.62  | -2.90 | -2.03 | -1.07 | -0.11 | 1.03  | 2.07  | 3.13 | 4.28 | 5.39 | 6.47 | 7.64 |
| 9.82  | -2.78 | -1.90 | -1.03 | 0.05  | 1.06  | 2.13  | 3.28 | 4.29 | 5.50 | 6.69 | 7.75 |
| 10.02 | -2.82 | -1.98 | -0.99 | -0.09 | 1.02  | 2.12  | 3.22 | 4.32 | 5.53 | 6.55 | 7.66 |
| 10.22 | -2.76 | -1.88 | -0.92 | 0.08  | 1.06  | 2.21  | 3.32 | 4.42 | 5.62 | 6.71 | 7.78 |
| 10.42 | -2.79 | -1.83 | -0.93 | 0.09  | 1.10  | 2.18  | 3.36 | 4.49 | 5.65 | 6.75 | 7.87 |
| 10.62 | -2.71 | -1.83 | -0.88 | 0.13  | 1.16  | 2.25  | 3.33 | 4.49 | 5.65 | 6.74 | 7.91 |
| 10.82 | -2.73 | -1.87 | -0.88 | 0.09  | 1.08  | 2.29  | 3.40 | 4.50 | 5.68 | 6.76 | 7.83 |
| 11.02 | -2.58 | -1.77 | -0.82 | 0.12  | 1.26  | 2.37  | 3.44 | 4.60 | 5.66 | 6.79 | 7.89 |
| 11.22 | -2.64 | -1.75 | -0.92 | 0.19  | 1.16  | 2.32  | 3.35 | 4.42 | 5.54 | 6.63 | 7.80 |
| 11.42 | -2.58 | -1.79 | -0.82 | 0.14  | 1.15  | 2.27  | 3.34 | 4.45 | 5.55 | 6.75 | 7.67 |
| 11.62 | -2.63 | -1.75 | -0.85 | 0.16  | 1.19  | 2.30  | 3.36 | 4.49 | 5.65 | 6.70 | 7.91 |
| 11.82 | -2.47 | -1.66 | -0.72 | 0.19  | 1.23  | 2.47  | 3.49 | 4.61 | 5.73 | 6.86 | 7.97 |
| 12.02 | -2.48 | -1.66 | -0.60 | 0.32  | 1.33  | 2.38  | 3.52 | 4.59 | 5.73 | 6.81 | 7.95 |
| 12.22 | -2.48 | -1.64 | -0.72 | 0.27  | 1.30  | 2.49  | 3.51 | 4.71 | 5.85 | 6.88 | 8.01 |
| 12.42 | -2.48 | -1.55 | -0.71 | 0.32  | 1.35  | 2.37  | 3.51 | 4.58 | 5.70 | 6.81 | 7.92 |
| 12.62 | -2.41 | -1.54 | -0.58 | 0.34  | 1.47  | 2.54  | 3.64 | 4.69 | 5.75 | 7.02 | 8.07 |
| 12.82 | -2.31 | -1.48 | -0.48 | 0.46  | 1.44  | 2.53  | 3.63 | 4.67 | 5.74 | 6.98 | 8.05 |
| 13.02 | -2.36 | -1.45 | -0.49 | 0.44  | 1.49  | 2.63  | 3.71 | 4.86 | 5.93 | 7.06 | 8.18 |
| 13.22 | -2.35 | -1.49 | -0.50 | 0.35  | 1.53  | 2.58  | 3.69 | 4.79 | 5.89 | 7.02 | 8.07 |
| 13.42 | -2.33 | -1.46 | -0.57 | 0.49  | 1.46  | 2.59  | 3.68 | 4.74 | 5.86 | 6.97 | 8.08 |
| 13.50 | -2.28 | -1.41 | -0.44 | 0.54  | 1.59  | 2.59  | 3.70 | 4.80 | 5.99 | 6.98 | 8.20 |

|       |       |       |       |      |      |      |      |      |      |      |       |
|-------|-------|-------|-------|------|------|------|------|------|------|------|-------|
| 13.59 | -2.28 | -1.40 | -0.45 | 0.52 | 1.58 | 2.72 | 3.74 | 4.85 | 6.05 | 7.11 | 8.28  |
| 13.68 | -2.26 | -1.33 | -0.46 | 0.49 | 1.47 | 2.65 | 3.72 | 4.81 | 5.89 | 7.02 | 8.15  |
| 13.78 | -2.35 | -1.46 | -0.51 | 0.46 | 1.48 | 2.61 | 3.70 | 4.76 | 5.87 | 6.93 | 8.11  |
| 13.88 | -2.30 | -1.46 | -0.48 | 0.49 | 1.42 | 2.52 | 3.63 | 4.79 | 5.89 | 6.97 | 8.16  |
| 14.00 | -2.22 | -1.45 | -0.50 | 0.50 | 1.62 | 2.66 | 3.82 | 4.93 | 6.01 | 7.12 | 8.26  |
| 14.12 | -2.27 | -1.38 | -0.50 | 0.43 | 1.61 | 2.58 | 3.74 | 4.78 | 5.94 | 7.08 | 8.15  |
| 14.25 | -2.23 | -1.35 | -0.52 | 0.45 | 1.49 | 2.66 | 3.69 | 4.82 | 5.88 | 6.99 | 8.19  |
| 14.40 | -2.27 | -1.35 | -0.38 | 0.62 | 1.62 | 2.73 | 3.82 | 5.01 | 6.10 | 7.31 | 8.38  |
| 14.55 | -2.31 | -1.30 | -0.48 | 0.59 | 1.61 | 2.68 | 3.69 | 4.89 | 5.97 | 7.10 | 8.15  |
| 14.72 | -2.17 | -1.22 | -0.36 | 0.60 | 1.63 | 2.73 | 3.80 | 4.95 | 6.12 | 7.29 | 8.21  |
| 14.90 | -2.13 | -1.26 | -0.33 | 0.65 | 1.58 | 2.75 | 3.82 | 4.84 | 6.01 | 7.08 | 8.17  |
| 15.09 | -2.13 | -1.19 | -0.34 | 0.68 | 1.70 | 2.79 | 3.83 | 4.90 | 6.03 | 7.17 | 8.27  |
| 15.30 | -2.09 | -1.32 | -0.28 | 0.55 | 1.68 | 2.69 | 3.83 | 4.86 | 6.08 | 7.16 | 8.25  |
| 15.53 | -2.02 | -1.16 | -0.18 | 0.73 | 1.75 | 2.95 | 3.96 | 5.10 | 6.29 | 7.40 | 8.51  |
| 15.77 | -2.02 | -1.19 | -0.26 | 0.69 | 1.73 | 2.81 | 3.90 | 4.97 | 6.13 | 7.28 | 8.32  |
| 16.04 | -2.08 | -1.23 | -0.31 | 0.72 | 1.72 | 2.92 | 3.92 | 5.04 | 6.18 | 7.33 | 8.52  |
| 16.32 | -2.02 | -1.08 | -0.23 | 0.80 | 1.89 | 2.89 | 4.01 | 5.12 | 6.19 | 7.36 | 8.41  |
| 16.63 | -1.98 | -1.14 | -0.19 | 0.85 | 1.88 | 3.05 | 4.16 | 5.19 | 6.30 | 7.44 | 8.52  |
| 16.96 | -1.97 | -1.11 | -0.09 | 0.88 | 1.91 | 2.96 | 4.12 | 5.18 | 6.32 | 7.48 | 8.65  |
| 17.31 | -2.05 | -1.06 | -0.14 | 0.77 | 1.80 | 3.00 | 4.03 | 5.22 | 6.27 | 7.38 | 8.53  |
| 17.70 | -1.80 | -1.07 | -0.10 | 0.93 | 2.05 | 3.10 | 4.27 | 5.32 | 6.50 | 7.66 | 8.73  |
| 18.11 | -1.93 | -1.08 | -0.10 | 0.79 | 1.83 | 2.86 | 4.02 | 5.02 | 6.23 | 7.33 | 8.41  |
| 18.56 | -1.87 | -0.99 | -0.09 | 0.94 | 1.89 | 3.08 | 4.13 | 5.16 | 6.29 | 7.39 | 8.56  |
| 19.04 | -1.89 | -1.03 | -0.06 | 0.95 | 1.92 | 3.07 | 4.16 | 5.19 | 6.38 | 7.47 | 8.69  |
| 19.56 | -1.83 | -0.89 | 0.05  | 1.06 | 2.01 | 3.21 | 4.33 | 5.37 | 6.51 | 7.70 | 8.75  |
| 20.12 | -1.77 | -0.89 | 0.01  | 1.05 | 2.09 | 3.15 | 4.37 | 5.46 | 6.59 | 7.64 | 8.77  |
| 20.72 | -1.67 | -0.98 | 0.08  | 1.11 | 2.15 | 3.24 | 4.32 | 5.45 | 6.59 | 7.64 | 8.78  |
| 21.37 | -1.63 | -0.86 | 0.11  | 1.13 | 2.11 | 3.24 | 4.42 | 5.60 | 6.65 | 7.80 | 8.90  |
| 22.08 | -1.75 | -0.92 | 0.08  | 1.11 | 2.12 | 3.24 | 4.31 | 5.39 | 6.63 | 7.73 | 8.80  |
| 22.84 | -1.78 | -0.82 | -0.07 | 1.05 | 2.18 | 3.24 | 4.38 | 5.48 | 6.62 | 7.82 | 8.85  |
| 23.65 | -1.72 | -0.82 | 0.07  | 1.05 | 2.13 | 3.26 | 4.26 | 5.38 | 6.58 | 7.59 | 8.74  |
| 24.54 | -1.54 | -0.70 | 0.21  | 1.33 | 2.33 | 3.44 | 4.55 | 5.72 | 6.82 | 8.00 | 9.17  |
| 25.49 | -1.58 | -0.67 | 0.33  | 1.32 | 2.45 | 3.47 | 4.66 | 5.76 | 6.98 | 8.02 | 9.15  |
| 26.51 | -1.61 | -0.64 | 0.22  | 1.21 | 2.28 | 3.41 | 4.36 | 5.60 | 6.64 | 7.76 | 8.92  |
| 27.62 | -1.41 | -0.48 | 0.42  | 1.48 | 2.49 | 3.55 | 4.81 | 5.91 | 7.06 | 8.21 | 9.32  |
| 28.81 | -1.39 | -0.51 | 0.43  | 1.40 | 2.42 | 3.58 | 4.69 | 5.80 | 7.01 | 8.13 | 9.24  |
| 30.10 | -1.39 | -0.48 | 0.49  | 1.41 | 2.47 | 3.59 | 4.69 | 5.80 | 6.88 | 8.03 | 9.09  |
| 31.49 | -1.24 | -0.32 | 0.65  | 1.62 | 2.61 | 3.81 | 4.95 | 5.96 | 7.25 | 8.33 | 9.53  |
| 32.98 | -1.27 | -0.32 | 0.64  | 1.59 | 2.69 | 3.75 | 4.88 | 6.05 | 7.13 | 8.21 | 9.35  |
| 34.60 | -1.12 | -0.27 | 0.71  | 1.74 | 2.78 | 3.92 | 5.02 | 6.14 | 7.38 | 8.54 | 9.63  |
| 36.34 | -1.19 | -0.29 | 0.66  | 1.61 | 2.65 | 3.88 | 5.04 | 6.13 | 7.36 | 8.43 | 9.57  |
| 38.21 | -0.99 | -0.14 | 0.81  | 1.96 | 2.89 | 4.15 | 5.32 | 6.36 | 7.52 | 8.77 | 9.82  |
| 40.24 | -1.09 | -0.13 | 0.84  | 1.82 | 2.91 | 4.10 | 5.19 | 6.34 | 7.44 | 8.63 | 9.74  |
| 42.42 | -0.99 | -0.15 | 0.84  | 1.84 | 2.88 | 3.99 | 5.04 | 6.21 | 7.41 | 8.51 | 9.63  |
| 44.78 | -0.97 | -0.15 | 0.83  | 1.86 | 2.91 | 4.06 | 5.16 | 6.32 | 7.47 | 8.63 | 9.70  |
| 47.32 | -0.94 | -0.03 | 0.91  | 1.89 | 2.89 | 4.13 | 5.21 | 6.27 | 7.51 | 8.49 | 9.71  |
| 50.06 | -0.88 | 0.00  | 0.99  | 2.00 | 3.12 | 4.23 | 5.28 | 6.44 | 7.62 | 8.80 | 9.95  |
| 53.01 | -0.84 | -0.04 | 0.95  | 1.99 | 3.02 | 4.20 | 5.31 | 6.42 | 7.70 | 8.74 | 9.92  |
| 56.20 | -0.70 | 0.21  | 1.13  | 2.14 | 3.18 | 4.37 | 5.55 | 6.68 | 7.79 | 8.89 | 10.17 |
| 59.64 | -0.61 | 0.28  | 1.26  | 2.25 | 3.47 | 4.59 | 5.71 | 6.89 | 8.09 | 9.29 | 10.50 |

|         |       |      |      |      |       |       |       |       |       |       |       |
|---------|-------|------|------|------|-------|-------|-------|-------|-------|-------|-------|
| 63.34   | -0.55 | 0.20 | 1.18 | 2.20 | 3.29  | 4.41  | 5.53  | 6.66  | 7.84  | 8.92  | 10.05 |
| 67.34   | -0.59 | 0.29 | 1.33 | 2.32 | 3.32  | 4.63  | 5.71  | 6.85  | 7.98  | 9.14  | 10.29 |
| 71.65   | -0.38 | 0.44 | 1.51 | 2.49 | 3.55  | 4.79  | 5.91  | 7.07  | 8.27  | 9.49  | 10.62 |
| 76.30   | -0.47 | 0.46 | 1.47 | 2.46 | 3.57  | 4.73  | 5.92  | 7.08  | 8.29  | 9.42  | 10.59 |
| 81.32   | -0.41 | 0.67 | 1.62 | 2.73 | 3.76  | 4.96  | 6.15  | 7.23  | 8.57  | 9.71  | 10.98 |
| 86.73   | -0.24 | 0.67 | 1.74 | 2.80 | 3.92  | 5.08  | 6.32  | 7.58  | 8.70  | 9.91  | 11.14 |
| 92.56   | -0.08 | 0.88 | 1.88 | 2.88 | 4.05  | 5.29  | 6.40  | 7.59  | 8.88  | 9.97  | 11.25 |
| 98.85   | -0.04 | 0.80 | 1.85 | 2.89 | 3.97  | 5.22  | 6.43  | 7.52  | 8.77  | 9.90  | 11.11 |
| 105.64  | 0.10  | 1.06 | 2.01 | 3.13 | 4.25  | 5.43  | 6.55  | 7.76  | 9.07  | 10.27 | 11.44 |
| 112.96  | 0.20  | 1.20 | 2.19 | 3.32 | 4.44  | 5.69  | 6.86  | 8.11  | 9.29  | 10.43 | 11.74 |
| 120.85  | 0.38  | 1.32 | 2.42 | 3.45 | 4.56  | 5.80  | 6.99  | 8.13  | 9.37  | 10.67 | 11.81 |
| 129.36  | 0.37  | 1.40 | 2.44 | 3.52 | 4.71  | 5.87  | 7.17  | 8.29  | 9.65  | 10.77 | 12.02 |
| 138.55  | 0.57  | 1.55 | 2.60 | 3.62 | 4.92  | 5.97  | 7.22  | 8.55  | 9.69  | 10.98 | 12.19 |
| 148.45  | 0.65  | 1.55 | 2.57 | 3.69 | 4.92  | 6.07  | 7.25  | 8.49  | 9.76  | 10.98 | 12.21 |
| 159.13  | 0.73  | 1.64 | 2.77 | 3.86 | 5.06  | 6.20  | 7.50  | 8.70  | 9.97  | 11.12 | 12.35 |
| 170.65  | 0.92  | 1.91 | 2.97 | 4.06 | 5.22  | 6.49  | 7.78  | 8.90  | 10.14 | 11.40 | 12.60 |
| 183.07  | 1.13  | 2.17 | 3.15 | 4.32 | 5.48  | 6.74  | 7.93  | 9.24  | 10.48 | 11.78 | 12.95 |
| 196.47  | 1.17  | 2.21 | 3.37 | 4.39 | 5.60  | 6.89  | 8.14  | 9.37  | 10.63 | 11.88 | 13.11 |
| 210.91  | 1.40  | 2.47 | 3.50 | 4.66 | 5.83  | 7.07  | 8.36  | 9.61  | 10.85 | 12.11 | 13.41 |
| 226.50  | 1.59  | 2.59 | 3.78 | 4.84 | 6.04  | 7.27  | 8.51  | 9.82  | 11.12 | 12.40 | 13.63 |
| 243.31  | 1.72  | 2.72 | 3.79 | 4.98 | 6.16  | 7.37  | 8.72  | 9.91  | 11.24 | 12.48 | 13.71 |
| 261.43  | 1.96  | 3.01 | 4.09 | 5.27 | 6.51  | 7.81  | 9.09  | 10.28 | 11.66 | 12.86 | 14.23 |
| 280.98  | 2.15  | 3.22 | 4.24 | 5.40 | 6.68  | 7.86  | 9.19  | 10.49 | 11.72 | 13.03 | 14.34 |
| 302.07  | 2.29  | 3.29 | 4.42 | 5.60 | 6.80  | 8.05  | 9.46  | 10.63 | 11.92 | 13.20 | 14.51 |
| 324.81  | 2.42  | 3.52 | 4.71 | 5.80 | 7.11  | 8.34  | 9.72  | 10.90 | 12.32 | 13.60 | 14.87 |
| 349.33  | 2.68  | 3.70 | 4.78 | 6.01 | 7.31  | 8.55  | 9.87  | 11.17 | 12.47 | 13.78 | 15.09 |
| 375.79  | 2.80  | 3.91 | 5.05 | 6.21 | 7.43  | 8.79  | 10.08 | 11.41 | 12.69 | 14.05 | 15.33 |
| 404.31  | 2.98  | 4.09 | 5.22 | 6.36 | 7.63  | 8.87  | 10.19 | 11.52 | 12.76 | 14.11 | 15.41 |
| 435.08  | 3.16  | 4.25 | 5.32 | 6.57 | 7.91  | 9.09  | 10.43 | 11.79 | 13.09 | 14.42 | 15.75 |
| 468.27  | 3.26  | 4.38 | 5.60 | 6.73 | 8.00  | 9.33  | 10.58 | 11.98 | 13.25 | 14.63 | 15.91 |
| 504.06  | 3.54  | 4.63 | 5.82 | 6.99 | 8.25  | 9.63  | 10.99 | 12.32 | 13.65 | 14.94 | 16.29 |
| 542.66  | 3.65  | 4.76 | 5.90 | 7.16 | 8.42  | 9.73  | 11.07 | 12.43 | 13.69 | 15.07 | 16.33 |
| 584.29  | 3.83  | 4.94 | 6.11 | 7.35 | 8.58  | 9.94  | 11.35 | 12.63 | 13.92 | 15.30 | 16.57 |
| 629.18  | 3.98  | 5.21 | 6.30 | 7.55 | 8.83  | 10.20 | 11.49 | 12.79 | 14.11 | 15.44 | 16.78 |
| 677.61  | 4.14  | 5.26 | 6.43 | 7.72 | 9.05  | 10.37 | 11.77 | 13.08 | 14.41 | 15.83 | 17.18 |
| 729.83  | 4.36  | 5.48 | 6.62 | 7.88 | 9.14  | 10.50 | 11.84 | 13.15 | 14.56 | 15.89 | 17.20 |
| 786.16  | 4.39  | 5.54 | 6.68 | 8.01 | 9.23  | 10.65 | 12.04 | 13.39 | 14.70 | 16.04 | 17.46 |
| 846.90  | 4.58  | 5.59 | 6.78 | 8.13 | 9.37  | 10.74 | 12.09 | 13.42 | 14.77 | 16.11 | 17.45 |
| 912.42  | 4.68  | 5.73 | 6.88 | 8.15 | 9.50  | 10.87 | 12.30 | 13.63 | 15.01 | 16.34 | 17.64 |
| 983.08  | 4.73  | 5.76 | 7.12 | 8.27 | 9.55  | 11.02 | 12.37 | 13.72 | 15.06 | 16.46 | 17.77 |
| 1059.29 | 4.80  | 5.92 | 7.10 | 8.42 | 9.65  | 11.09 | 12.50 | 13.86 | 15.24 | 16.65 | 17.99 |
| 1141.48 | 4.83  | 6.04 | 7.15 | 8.46 | 9.81  | 11.14 | 12.55 | 13.83 | 15.24 | 16.61 | 17.84 |
| 1230.13 | 4.84  | 5.96 | 7.18 | 8.42 | 9.74  | 11.04 | 12.45 | 13.80 | 15.23 | 16.53 | 17.91 |
| 1325.73 | 4.83  | 6.05 | 7.23 | 8.45 | 9.86  | 11.22 | 12.53 | 13.94 | 15.32 | 16.68 | 18.04 |
| 1428.84 | 4.79  | 6.01 | 7.21 | 8.50 | 9.87  | 11.21 | 12.59 | 13.92 | 15.29 | 16.72 | 17.98 |
| 1540.05 | 4.89  | 6.07 | 7.28 | 8.53 | 9.87  | 11.29 | 12.61 | 14.01 | 15.41 | 16.80 | 18.12 |
| 1659.99 | 4.94  | 6.09 | 7.26 | 8.67 | 10.01 | 11.37 | 12.64 | 14.03 | 15.42 | 16.73 | 18.18 |
| 1789.34 | 4.96  | 6.11 | 7.25 | 8.60 | 9.94  | 11.28 | 12.68 | 14.09 | 15.42 | 16.75 | 18.09 |
| 1928.85 | 4.97  | 6.06 | 7.34 | 8.65 | 9.95  | 11.33 | 12.77 | 14.01 | 15.52 | 16.79 | 18.14 |
| 2079.31 | 4.97  | 6.08 | 7.33 | 8.59 | 9.84  | 11.29 | 12.70 | 14.01 | 15.40 | 16.87 | 18.15 |

|         |      |      |      |      |      |       |       |       |       |       |       |
|---------|------|------|------|------|------|-------|-------|-------|-------|-------|-------|
| 2241.59 | 4.87 | 6.10 | 7.26 | 8.51 | 9.88 | 11.22 | 12.69 | 13.94 | 15.39 | 16.66 | 18.11 |
| 2416.60 | 4.77 | 5.99 | 7.15 | 8.52 | 9.78 | 11.20 | 12.56 | 13.91 | 15.34 | 16.78 | 18.08 |
| 2605.36 | 4.77 | 5.95 | 7.21 | 8.49 | 9.95 | 11.16 | 12.57 | 13.92 | 15.37 | 16.71 | 18.04 |
| 2808.94 | 4.83 | 5.99 | 7.21 | 8.57 | 9.76 | 11.15 | 12.57 | 13.92 | 15.29 | 16.69 | 17.97 |
| 3028.50 | 4.82 | 5.96 | 7.27 | 8.46 | 9.77 | 11.18 | 12.49 | 13.95 | 15.23 | 16.68 | 17.89 |
| 3265.30 | 4.72 | 5.89 | 7.19 | 8.37 | 9.67 | 11.13 | 12.51 | 13.93 | 15.17 | 16.59 | 17.94 |
| 3520.69 | 4.69 | 5.88 | 7.06 | 8.36 | 9.71 | 11.05 | 12.31 | 13.79 | 15.08 | 16.39 | 17.84 |
| 3796.13 | 4.81 | 6.01 | 7.04 | 8.35 | 9.70 | 11.04 | 12.44 | 13.75 | 15.10 | 16.51 | 17.79 |

| Wavelength<br>(nm) | 553.39 | 554.82 | 556.24 | 557.67 | 559.09 | 560.51 | 561.94 | 563.36 | 564.79 | 566.21 | 567.63 |
|--------------------|--------|--------|--------|--------|--------|--------|--------|--------|--------|--------|--------|
| -3.78              | 0.07   | -0.04  | -0.02  | -0.03  | -0.05  | 0.01   | -0.09  | -0.03  | -0.05  | -0.05  | -0.01  |
| -3.28              | 0.05   | 0.09   | -0.03  | 0.06   | -0.03  | 0.03   | 0.03   | -0.01  | -0.04  | -0.04  | -0.06  |
| -2.78              | -0.03  | -0.04  | 0.04   | 0.04   | 0.03   | -0.07  | -0.01  | 0.04   | 0.06   | 0.02   | 0.03   |
| -2.28              | -0.01  | 0.02   | 0.04   | 0.02   | 0.03   | -0.05  | -0.01  | -0.01  | -0.01  | -0.04  | 0.00   |
| -1.78              | 0.08   | -0.03  | -0.01  | -0.04  | -0.02  | 0.02   | 0.00   | -0.01  | 0.00   | 0.05   | -0.02  |
| -1.28              | -0.05  | -0.05  | 0.01   | -0.01  | 0.00   | 0.02   | 0.06   | 0.05   | 0.04   | 0.03   | 0.00   |
| -0.78              | -0.05  | 0.05   | -0.02  | 0.01   | 0.00   | 0.03   | 0.01   | 0.00   | -0.03  | 0.07   | 0.02   |
| -0.28              | -0.05  | -0.01  | 0.00   | -0.05  | 0.04   | 0.01   | 0.01   | -0.02  | 0.02   | -0.04  | 0.03   |
| -0.18              | 0.05   | 0.04   | 0.02   | 0.02   | 0.05   | 0.07   | 0.04   | 0.02   | -0.05  | -0.01  | 0.02   |
| -0.08              | -0.04  | 0.02   | -0.03  | 0.00   | -0.01  | -0.06  | -0.01  | -0.01  | 0.00   | -0.01  | -0.01  |
| 0.02               | 0.03   | 0.01   | 0.04   | 0.11   | 0.11   | 0.04   | 0.09   | 0.03   | -0.01  | 0.02   | 0.09   |
| 0.12               | 0.04   | 0.03   | 0.05   | 0.03   | 0.02   | 0.05   | 0.03   | 0.01   | 0.09   | 0.04   | 0.01   |
| 0.22               | 0.06   | -0.02  | 0.06   | 0.04   | 0.05   | 0.08   | -0.01  | -0.03  | 0.06   | 0.05   | 0.02   |
| 0.27               | 0.01   | -0.06  | 0.08   | 0.01   | 0.03   | 0.06   | 0.01   | 0.06   | 0.00   | -0.01  | 0.05   |
| 0.32               | 0.04   | 0.05   | -0.03  | 0.02   | 0.04   | 0.09   | 0.00   | -0.02  | 0.04   | -0.01  | 0.11   |
| 0.37               | 0.01   | -0.05  | -0.08  | -0.01  | 0.03   | 0.01   | 0.02   | -0.07  | -0.09  | -0.02  | -0.03  |
| 0.42               | -0.10  | -0.08  | -0.05  | -0.04  | -0.05  | -0.04  | 0.03   | -0.04  | -0.05  | -0.06  | -0.11  |
| 0.47               | 0.05   | 0.05   | 0.05   | -0.01  | 0.04   | 0.01   | 0.03   | -0.08  | 0.00   | -0.03  | 0.01   |
| 0.52               | 0.00   | -0.04  | 0.03   | 0.02   | 0.02   | 0.03   | 0.03   | -0.02  | -0.05  | 0.03   | -0.03  |
| 0.57               | -0.02  | -0.07  | 0.07   | 0.05   | 0.07   | 0.01   | 0.10   | 0.03   | 0.07   | 0.02   | 0.06   |
| 0.62               | 0.04   | -0.07  | 0.02   | 0.04   | 0.05   | 0.01   | -0.03  | -0.03  | 0.00   | -0.02  | -0.05  |
| 0.67               | -0.05  | -0.05  | 0.00   | -0.02  | -0.01  | -0.01  | 0.00   | 0.00   | 0.01   | 0.03   | 0.01   |
| 0.72               | -0.04  | -0.07  | -0.01  | -0.07  | -0.04  | 0.03   | -0.03  | -0.08  | -0.06  | -0.07  | 0.00   |
| 0.77               | -0.03  | -0.02  | -0.01  | -0.01  | 0.00   | 0.05   | 0.09   | -0.09  | -0.03  | -0.01  | 0.01   |
| 0.82               | -0.03  | -0.05  | -0.08  | -0.05  | 0.09   | 0.04   | 0.05   | 0.04   | 0.00   | 0.01   | 0.03   |
| 0.87               | 0.05   | -0.02  | -0.01  | -0.03  | -0.08  | -0.02  | 0.07   | 0.04   | -0.02  | -0.04  | -0.03  |
| 0.92               | 0.10   | 0.01   | 0.02   | -0.03  | 0.01   | -0.02  | 0.01   | -0.03  | 0.06   | 0.06   | 0.00   |
| 0.97               | 0.06   | 0.01   | 0.05   | 0.01   | 0.00   | 0.00   | -0.03  | -0.03  | -0.02  | -0.07  | 0.03   |
| 1.02               | -0.01  | -0.01  | -0.01  | 0.05   | 0.01   | 0.08   | 0.01   | 0.02   | 0.07   | 0.05   | 0.09   |
| 1.07               | 0.06   | 0.00   | -0.02  | -0.01  | 0.01   | 0.05   | 0.04   | 0.01   | 0.03   | -0.01  | 0.00   |
| 1.12               | -0.03  | 0.04   | 0.04   | -0.02  | -0.07  | 0.05   | -0.03  | -0.10  | -0.04  | 0.05   | 0.02   |
| 1.17               | 0.08   | -0.01  | -0.06  | 0.02   | 0.09   | 0.08   | -0.03  | -0.09  | 0.07   | 0.08   | -0.04  |
| 1.22               | 0.19   | 0.07   | 0.07   | -0.02  | -0.10  | -0.16  | -0.22  | -0.32  | -0.22  | -0.07  | 0.02   |
| 1.27               | -23.52 | -18.05 | -12.63 | -7.90  | -3.99  | -1.26  | 0.50   | 1.06   | 0.99   | 0.46   | -0.14  |
| 1.32               | 40.12  | 35.16  | 30.24  | 25.49  | 21.25  | 17.42  | 13.02  | 8.72   | 4.34   | 0.26   | -4.03  |
| 1.37               | -49.09 | -39.25 | -27.69 | -14.51 | -0.30  | 15.18  | 30.21  | 44.95  | 58.84  | 71.84  | 82.55  |
| 1.42               | -5.79  | -5.48  | -4.88  | -4.08  | -3.13  | -1.97  | -0.97  | 0.03   | 0.48   | 0.58   | 0.03   |

|      |       |       |       |       |       |       |       |       |       |       |       |
|------|-------|-------|-------|-------|-------|-------|-------|-------|-------|-------|-------|
| 1.47 | -4.38 | -3.35 | -2.27 | -1.27 | -0.16 | 0.88  | 2.00  | 3.09  | 4.23  | 5.37  | 6.35  |
| 1.52 | -3.98 | -2.76 | -1.53 | -0.39 | 0.65  | 1.72  | 2.57  | 3.45  | 4.13  | 4.86  | 5.53  |
| 1.57 | -3.13 | -2.29 | -1.34 | -0.53 | 0.42  | 1.26  | 1.97  | 2.63  | 3.45  | 4.08  | 4.62  |
| 1.62 | -2.52 | -1.71 | -0.93 | -0.24 | 0.49  | 1.18  | 1.85  | 2.47  | 3.19  | 3.68  | 4.41  |
| 1.67 | -1.92 | -0.98 | 0.06  | 1.06  | 1.83  | 2.64  | 3.35  | 4.01  | 4.61  | 5.16  | 5.69  |
| 1.72 | -2.03 | -1.18 | -0.38 | 0.46  | 1.35  | 2.20  | 2.84  | 3.65  | 4.36  | 4.98  | 5.57  |
| 1.77 | -0.08 | 0.84  | 1.74  | 2.56  | 3.38  | 3.95  | 4.57  | 5.08  | 5.59  | 5.99  | 6.48  |
| 1.82 | -0.83 | 0.06  | 1.01  | 1.85  | 2.69  | 3.53  | 4.24  | 4.84  | 5.51  | 6.05  | 6.54  |
| 1.87 | 0.63  | 1.34  | 2.31  | 3.00  | 3.81  | 4.51  | 5.15  | 5.70  | 6.47  | 6.95  | 7.56  |
| 1.92 | 0.59  | 1.57  | 2.65  | 3.48  | 4.34  | 5.07  | 5.72  | 6.31  | 6.83  | 7.36  | 7.77  |
| 1.97 | 1.04  | 1.86  | 2.86  | 3.69  | 4.58  | 5.32  | 6.03  | 6.68  | 7.23  | 7.79  | 8.30  |
| 2.02 | 1.73  | 2.56  | 3.40  | 4.17  | 4.84  | 5.52  | 6.12  | 6.59  | 7.07  | 7.52  | 8.10  |
| 2.07 | 1.98  | 2.92  | 3.81  | 4.75  | 5.58  | 6.31  | 6.99  | 7.47  | 8.07  | 8.50  | 8.89  |
| 2.12 | 1.79  | 2.62  | 3.55  | 4.33  | 5.19  | 5.91  | 6.51  | 7.21  | 7.65  | 8.20  | 8.74  |
| 2.17 | 2.40  | 3.31  | 4.08  | 4.93  | 5.66  | 6.33  | 6.87  | 7.39  | 7.81  | 8.24  | 8.68  |
| 2.22 | 2.44  | 3.41  | 4.36  | 5.30  | 6.23  | 6.88  | 7.53  | 8.19  | 8.77  | 9.20  | 9.74  |
| 2.27 | 2.84  | 3.83  | 4.70  | 5.49  | 6.26  | 7.06  | 7.74  | 8.30  | 8.94  | 9.39  | 9.95  |
| 2.32 | 3.03  | 4.06  | 4.91  | 5.80  | 6.60  | 7.23  | 7.95  | 8.39  | 9.00  | 9.26  | 9.78  |
| 2.37 | 3.10  | 4.03  | 4.98  | 5.80  | 6.67  | 7.39  | 8.02  | 8.69  | 9.25  | 9.78  | 10.26 |
| 2.42 | 3.55  | 4.49  | 5.37  | 6.15  | 6.94  | 7.62  | 8.30  | 8.83  | 9.36  | 9.82  | 10.40 |
| 2.47 | 3.64  | 4.60  | 5.61  | 6.47  | 7.26  | 8.02  | 8.73  | 9.31  | 9.88  | 10.29 | 10.63 |
| 2.52 | 3.79  | 4.68  | 5.65  | 6.56  | 7.35  | 8.11  | 8.77  | 9.51  | 9.98  | 10.52 | 10.90 |
| 2.57 | 4.17  | 5.06  | 6.01  | 6.85  | 7.61  | 8.37  | 9.09  | 9.56  | 10.12 | 10.52 | 11.00 |
| 2.62 | 4.12  | 5.02  | 6.11  | 7.10  | 7.98  | 8.69  | 9.36  | 9.98  | 10.54 | 11.06 | 11.54 |
| 2.67 | 4.11  | 5.08  | 5.99  | 6.80  | 7.60  | 8.41  | 8.93  | 9.60  | 10.16 | 10.72 | 11.06 |
| 2.72 | 4.58  | 5.48  | 6.48  | 7.36  | 8.11  | 8.92  | 9.54  | 10.10 | 10.69 | 11.13 | 11.51 |
| 2.77 | 4.48  | 5.39  | 6.36  | 7.25  | 8.13  | 8.92  | 9.65  | 10.18 | 10.79 | 11.20 | 11.62 |
| 2.82 | 4.67  | 5.58  | 6.46  | 7.41  | 8.16  | 8.93  | 9.62  | 10.16 | 10.62 | 11.20 | 11.66 |
| 2.87 | 4.76  | 5.78  | 6.72  | 7.58  | 8.36  | 9.11  | 9.77  | 10.33 | 10.90 | 11.31 | 11.78 |
| 2.92 | 4.86  | 5.83  | 6.87  | 7.66  | 8.59  | 9.36  | 10.13 | 10.78 | 11.25 | 11.76 | 12.30 |
| 2.97 | 5.19  | 6.13  | 7.09  | 7.90  | 8.71  | 9.47  | 10.10 | 10.68 | 11.16 | 11.64 | 12.12 |
| 3.02 | 5.13  | 6.06  | 7.13  | 7.95  | 8.92  | 9.68  | 10.42 | 10.99 | 11.60 | 11.99 | 12.55 |
| 3.07 | 5.20  | 5.99  | 7.02  | 7.91  | 8.72  | 9.48  | 10.12 | 10.67 | 11.25 | 11.76 | 12.30 |
| 3.12 | 5.30  | 6.30  | 7.27  | 8.12  | 8.89  | 9.68  | 10.30 | 10.92 | 11.39 | 11.90 | 12.37 |
| 3.17 | 5.40  | 6.25  | 7.28  | 8.14  | 9.04  | 9.78  | 10.49 | 11.13 | 11.66 | 12.13 | 12.58 |
| 3.22 | 5.61  | 6.52  | 7.55  | 8.46  | 9.33  | 10.08 | 10.77 | 11.36 | 11.96 | 12.47 | 12.85 |
| 3.42 | 5.81  | 6.92  | 7.89  | 8.88  | 9.69  | 10.50 | 11.16 | 11.89 | 12.39 | 12.91 | 13.36 |
| 3.62 | 6.03  | 6.97  | 8.06  | 8.97  | 9.95  | 10.70 | 11.44 | 12.10 | 12.61 | 13.22 | 13.65 |
| 3.82 | 6.16  | 7.13  | 8.22  | 9.18  | 10.02 | 10.79 | 11.54 | 12.20 | 12.72 | 13.23 | 13.72 |
| 4.02 | 6.45  | 7.39  | 8.47  | 9.40  | 10.28 | 11.09 | 11.88 | 12.46 | 13.06 | 13.68 | 14.10 |
| 4.22 | 6.41  | 7.44  | 8.53  | 9.44  | 10.28 | 11.06 | 11.89 | 12.45 | 13.04 | 13.47 | 13.99 |
| 4.42 | 6.60  | 7.62  | 8.66  | 9.58  | 10.51 | 11.31 | 12.01 | 12.68 | 13.27 | 13.78 | 14.32 |
| 4.62 | 6.92  | 7.87  | 8.89  | 9.83  | 10.81 | 11.56 | 12.29 | 12.97 | 13.61 | 14.09 | 14.67 |
| 4.82 | 6.81  | 7.85  | 8.80  | 9.82  | 10.73 | 11.52 | 12.21 | 12.86 | 13.51 | 14.02 | 14.51 |
| 5.02 | 7.14  | 8.12  | 9.14  | 10.10 | 11.07 | 11.86 | 12.66 | 13.23 | 13.90 | 14.37 | 14.92 |
| 5.22 | 7.12  | 8.19  | 9.23  | 10.20 | 11.12 | 11.87 | 12.67 | 13.38 | 14.01 | 14.47 | 15.02 |
| 5.42 | 7.30  | 8.36  | 9.48  | 10.35 | 11.30 | 12.12 | 12.76 | 13.45 | 14.00 | 14.65 | 15.16 |
| 5.62 | 7.52  | 8.52  | 9.50  | 10.47 | 11.45 | 12.26 | 13.02 | 13.67 | 14.23 | 14.89 | 15.36 |
| 5.82 | 7.49  | 8.60  | 9.59  | 10.55 | 11.47 | 12.23 | 13.05 | 13.73 | 14.33 | 14.83 | 15.32 |
| 6.02 | 7.72  | 8.74  | 9.72  | 10.79 | 11.73 | 12.50 | 13.30 | 13.92 | 14.57 | 15.12 | 15.59 |

|       |      |       |       |       |       |       |       |       |       |       |       |
|-------|------|-------|-------|-------|-------|-------|-------|-------|-------|-------|-------|
| 6.22  | 7.72 | 8.68  | 9.69  | 10.70 | 11.64 | 12.56 | 13.20 | 13.78 | 14.49 | 14.95 | 15.53 |
| 6.42  | 7.78 | 8.81  | 9.87  | 10.86 | 11.75 | 12.60 | 13.35 | 14.02 | 14.67 | 15.21 | 15.73 |
| 6.62  | 8.08 | 9.22  | 10.22 | 11.29 | 12.13 | 12.94 | 13.69 | 14.42 | 14.95 | 15.62 | 16.06 |
| 6.82  | 8.06 | 9.05  | 10.08 | 11.05 | 12.09 | 12.85 | 13.60 | 14.21 | 14.84 | 15.42 | 15.86 |
| 7.02  | 8.22 | 9.21  | 10.36 | 11.28 | 12.21 | 13.06 | 13.91 | 14.48 | 15.15 | 15.76 | 16.23 |
| 7.22  | 8.22 | 9.30  | 10.34 | 11.32 | 12.21 | 13.01 | 13.81 | 14.44 | 15.14 | 15.59 | 16.19 |
| 7.42  | 8.33 | 9.44  | 10.49 | 11.47 | 12.39 | 13.24 | 14.07 | 14.74 | 15.40 | 15.89 | 16.42 |
| 7.62  | 8.32 | 9.39  | 10.41 | 11.45 | 12.37 | 13.23 | 13.96 | 14.62 | 15.29 | 15.75 | 16.33 |
| 7.82  | 8.45 | 9.43  | 10.53 | 11.48 | 12.40 | 13.27 | 14.02 | 14.60 | 15.26 | 15.81 | 16.37 |
| 8.02  | 8.47 | 9.45  | 10.45 | 11.44 | 12.35 | 13.17 | 13.85 | 14.61 | 15.23 | 15.78 | 16.23 |
| 8.22  | 8.30 | 9.46  | 10.45 | 11.51 | 12.36 | 13.22 | 13.94 | 14.61 | 15.16 | 15.87 | 16.31 |
| 8.42  | 8.38 | 9.38  | 10.47 | 11.36 | 12.33 | 13.18 | 13.84 | 14.54 | 15.17 | 15.67 | 16.16 |
| 8.62  | 8.59 | 9.54  | 10.54 | 11.64 | 12.56 | 13.36 | 14.11 | 14.79 | 15.43 | 15.98 | 16.47 |
| 8.82  | 8.72 | 9.83  | 10.83 | 11.75 | 12.64 | 13.60 | 14.32 | 14.98 | 15.63 | 16.17 | 16.69 |
| 9.02  | 8.55 | 9.56  | 10.67 | 11.57 | 12.46 | 13.29 | 14.08 | 14.67 | 15.32 | 15.87 | 16.45 |
| 9.22  | 8.67 | 9.67  | 10.72 | 11.75 | 12.59 | 13.40 | 14.24 | 14.93 | 15.50 | 16.12 | 16.60 |
| 9.42  | 8.89 | 9.82  | 10.95 | 11.88 | 12.85 | 13.64 | 14.44 | 15.04 | 15.66 | 16.24 | 16.70 |
| 9.62  | 8.78 | 9.79  | 10.79 | 11.86 | 12.81 | 13.63 | 14.39 | 15.01 | 15.57 | 16.21 | 16.64 |
| 9.82  | 8.90 | 9.92  | 11.00 | 11.94 | 12.90 | 13.78 | 14.50 | 15.10 | 15.74 | 16.37 | 16.82 |
| 10.02 | 8.87 | 9.83  | 10.96 | 11.83 | 12.75 | 13.58 | 14.40 | 15.00 | 15.61 | 16.19 | 16.66 |
| 10.22 | 8.95 | 10.03 | 11.06 | 12.05 | 12.98 | 13.79 | 14.50 | 15.27 | 15.78 | 16.44 | 16.94 |
| 10.42 | 8.97 | 9.98  | 11.08 | 12.08 | 13.04 | 13.78 | 14.56 | 15.28 | 15.84 | 16.43 | 17.00 |
| 10.62 | 9.11 | 10.05 | 11.09 | 12.04 | 13.00 | 13.85 | 14.55 | 15.25 | 15.91 | 16.56 | 16.95 |
| 10.82 | 8.98 | 10.04 | 11.04 | 12.00 | 12.94 | 13.76 | 14.52 | 15.20 | 15.80 | 16.33 | 16.78 |
| 11.02 | 9.01 | 10.04 | 11.08 | 12.10 | 12.97 | 13.83 | 14.57 | 15.23 | 15.90 | 16.38 | 16.92 |
| 11.22 | 8.85 | 9.93  | 11.07 | 11.91 | 12.82 | 13.59 | 14.38 | 15.01 | 15.68 | 16.23 | 16.64 |
| 11.42 | 8.81 | 9.90  | 10.89 | 11.86 | 12.69 | 13.57 | 14.33 | 14.98 | 15.61 | 16.09 | 16.57 |
| 11.62 | 9.01 | 10.05 | 11.01 | 12.05 | 12.98 | 13.82 | 14.58 | 15.20 | 15.84 | 16.36 | 16.87 |
| 11.82 | 9.04 | 10.14 | 11.11 | 12.11 | 13.00 | 13.88 | 14.64 | 15.25 | 15.82 | 16.42 | 16.97 |
| 12.02 | 9.09 | 10.01 | 11.16 | 12.22 | 13.04 | 13.86 | 14.66 | 15.29 | 15.87 | 16.45 | 16.95 |
| 12.22 | 9.21 | 10.23 | 11.25 | 12.31 | 13.19 | 14.04 | 14.85 | 15.45 | 16.13 | 16.64 | 17.21 |
| 12.42 | 9.05 | 10.06 | 11.04 | 12.00 | 12.95 | 13.73 | 14.43 | 15.20 | 15.76 | 16.29 | 16.79 |
| 12.62 | 9.16 | 10.18 | 11.27 | 12.21 | 13.04 | 13.92 | 14.65 | 15.35 | 15.93 | 16.58 | 17.02 |
| 12.82 | 9.15 | 10.13 | 11.22 | 12.14 | 13.09 | 13.95 | 14.62 | 15.27 | 15.91 | 16.46 | 16.87 |
| 13.02 | 9.42 | 10.38 | 11.50 | 12.40 | 13.30 | 14.10 | 14.98 | 15.55 | 16.24 | 16.78 | 17.27 |
| 13.22 | 9.24 | 10.23 | 11.32 | 12.34 | 13.13 | 14.01 | 14.77 | 15.50 | 16.07 | 16.64 | 17.10 |
| 13.42 | 9.17 | 10.20 | 11.37 | 12.24 | 13.12 | 13.93 | 14.71 | 15.38 | 16.05 | 16.60 | 17.02 |
| 13.50 | 9.30 | 10.29 | 11.36 | 12.28 | 13.09 | 13.99 | 14.71 | 15.33 | 15.96 | 16.54 | 16.98 |
| 13.59 | 9.38 | 10.42 | 11.46 | 12.38 | 13.31 | 14.15 | 14.93 | 15.65 | 16.24 | 16.76 | 17.33 |
| 13.68 | 9.22 | 10.23 | 11.26 | 12.31 | 13.23 | 13.93 | 14.79 | 15.48 | 15.97 | 16.52 | 17.11 |
| 13.78 | 9.15 | 10.20 | 11.20 | 12.15 | 12.98 | 13.90 | 14.54 | 15.22 | 15.81 | 16.41 | 16.86 |
| 13.88 | 9.24 | 10.27 | 11.30 | 12.39 | 13.13 | 13.96 | 14.82 | 15.35 | 15.93 | 16.54 | 17.09 |
| 14.00 | 9.41 | 10.42 | 11.58 | 12.45 | 13.37 | 14.22 | 14.99 | 15.64 | 16.30 | 16.80 | 17.31 |
| 14.12 | 9.30 | 10.33 | 11.43 | 12.41 | 13.29 | 14.10 | 14.81 | 15.57 | 16.19 | 16.70 | 17.20 |
| 14.25 | 9.21 | 10.23 | 11.32 | 12.26 | 13.23 | 13.93 | 14.77 | 15.39 | 16.04 | 16.56 | 17.04 |
| 14.40 | 9.51 | 10.55 | 11.61 | 12.56 | 13.47 | 14.38 | 15.15 | 15.80 | 16.43 | 16.94 | 17.47 |
| 14.55 | 9.29 | 10.34 | 11.35 | 12.37 | 13.22 | 14.04 | 14.86 | 15.49 | 16.06 | 16.63 | 17.08 |
| 14.72 | 9.45 | 10.45 | 11.51 | 12.44 | 13.37 | 14.16 | 14.96 | 15.58 | 16.16 | 16.78 | 17.19 |
| 14.90 | 9.26 | 10.30 | 11.38 | 12.27 | 13.25 | 14.04 | 14.88 | 15.40 | 16.03 | 16.67 | 17.11 |
| 15.09 | 9.39 | 10.38 | 11.35 | 12.37 | 13.16 | 14.10 | 14.79 | 15.43 | 16.01 | 16.60 | 16.98 |

|        |       |       |       |       |       |       |       |       |       |       |       |
|--------|-------|-------|-------|-------|-------|-------|-------|-------|-------|-------|-------|
| 15.30  | 9.37  | 10.39 | 11.46 | 12.40 | 13.35 | 14.16 | 14.98 | 15.60 | 16.22 | 16.71 | 17.19 |
| 15.53  | 9.63  | 10.63 | 11.70 | 12.72 | 13.66 | 14.45 | 15.27 | 15.93 | 16.48 | 17.02 | 17.59 |
| 15.77  | 9.40  | 10.47 | 11.50 | 12.50 | 13.45 | 14.21 | 14.96 | 15.66 | 16.29 | 16.86 | 17.35 |
| 16.04  | 9.58  | 10.65 | 11.59 | 12.65 | 13.55 | 14.39 | 15.12 | 15.81 | 16.48 | 17.01 | 17.47 |
| 16.32  | 9.49  | 10.55 | 11.59 | 12.62 | 13.46 | 14.30 | 15.07 | 15.72 | 16.38 | 16.96 | 17.39 |
| 16.63  | 9.69  | 10.74 | 11.79 | 12.73 | 13.74 | 14.56 | 15.36 | 15.93 | 16.61 | 17.14 | 17.55 |
| 16.96  | 9.78  | 10.78 | 11.79 | 12.74 | 13.74 | 14.52 | 15.31 | 15.99 | 16.62 | 17.15 | 17.72 |
| 17.31  | 9.62  | 10.69 | 11.69 | 12.74 | 13.60 | 14.41 | 15.15 | 15.85 | 16.47 | 17.06 | 17.49 |
| 17.70  | 9.89  | 10.94 | 12.00 | 13.02 | 13.86 | 14.75 | 15.62 | 16.23 | 16.89 | 17.43 | 17.94 |
| 18.11  | 9.51  | 10.43 | 11.52 | 12.52 | 13.39 | 14.19 | 14.98 | 15.61 | 16.24 | 16.76 | 17.22 |
| 18.56  | 9.68  | 10.71 | 11.76 | 12.58 | 13.58 | 14.44 | 15.18 | 15.87 | 16.57 | 17.03 | 17.52 |
| 19.04  | 9.73  | 10.71 | 11.77 | 12.82 | 13.64 | 14.51 | 15.23 | 15.86 | 16.52 | 17.04 | 17.52 |
| 19.56  | 9.88  | 10.92 | 12.00 | 12.96 | 13.89 | 14.78 | 15.55 | 16.16 | 16.89 | 17.43 | 17.93 |
| 20.12  | 9.92  | 10.97 | 12.02 | 13.08 | 13.89 | 14.70 | 15.52 | 16.22 | 16.87 | 17.33 | 17.91 |
| 20.72  | 9.96  | 10.97 | 12.10 | 13.03 | 14.06 | 14.81 | 15.64 | 16.24 | 16.89 | 17.46 | 17.99 |
| 21.37  | 10.01 | 11.07 | 12.12 | 13.07 | 14.00 | 14.83 | 15.57 | 16.30 | 16.90 | 17.50 | 17.95 |
| 22.08  | 9.98  | 10.94 | 12.05 | 13.04 | 13.96 | 14.78 | 15.54 | 16.32 | 16.85 | 17.44 | 17.98 |
| 22.84  | 10.02 | 11.12 | 12.14 | 13.14 | 14.09 | 14.92 | 15.68 | 16.34 | 17.05 | 17.55 | 18.11 |
| 23.65  | 9.84  | 10.97 | 11.89 | 12.88 | 13.82 | 14.67 | 15.36 | 16.11 | 16.65 | 17.23 | 17.74 |
| 24.54  | 10.20 | 11.33 | 12.39 | 13.35 | 14.19 | 15.08 | 15.85 | 16.45 | 17.17 | 17.67 | 18.19 |
| 25.49  | 10.39 | 11.36 | 12.39 | 13.40 | 14.39 | 15.26 | 16.03 | 16.64 | 17.42 | 17.95 | 18.39 |
| 26.51  | 10.06 | 11.00 | 12.09 | 13.07 | 13.88 | 14.79 | 15.46 | 16.27 | 16.84 | 17.34 | 17.94 |
| 27.62  | 10.42 | 11.49 | 12.48 | 13.60 | 14.53 | 15.39 | 16.08 | 16.77 | 17.43 | 17.98 | 18.55 |
| 28.81  | 10.48 | 11.44 | 12.57 | 13.53 | 14.46 | 15.36 | 16.10 | 16.76 | 17.39 | 17.90 | 18.49 |
| 30.10  | 10.27 | 11.32 | 12.36 | 13.29 | 14.21 | 15.04 | 15.80 | 16.50 | 17.12 | 17.60 | 18.17 |
| 31.49  | 10.66 | 11.70 | 12.73 | 13.78 | 14.70 | 15.57 | 16.35 | 17.03 | 17.56 | 18.28 | 18.72 |
| 32.98  | 10.50 | 11.51 | 12.61 | 13.64 | 14.49 | 15.28 | 16.17 | 16.87 | 17.53 | 18.05 | 18.60 |
| 34.60  | 10.81 | 11.86 | 12.81 | 13.83 | 14.79 | 15.74 | 16.49 | 17.18 | 17.91 | 18.39 | 18.98 |
| 36.34  | 10.73 | 11.74 | 12.80 | 13.76 | 14.81 | 15.51 | 16.44 | 17.11 | 17.71 | 18.26 | 18.83 |
| 38.21  | 10.99 | 12.15 | 13.20 | 14.31 | 15.15 | 16.01 | 16.80 | 17.54 | 18.19 | 18.76 | 19.31 |
| 40.24  | 10.97 | 11.92 | 13.03 | 14.10 | 15.03 | 15.86 | 16.63 | 17.31 | 18.05 | 18.61 | 19.11 |
| 42.42  | 10.77 | 11.88 | 12.88 | 13.83 | 14.76 | 15.65 | 16.42 | 17.12 | 17.75 | 18.38 | 18.80 |
| 44.78  | 10.86 | 11.90 | 13.00 | 13.91 | 14.90 | 15.76 | 16.58 | 17.26 | 17.86 | 18.47 | 19.07 |
| 47.32  | 10.90 | 11.88 | 12.94 | 13.95 | 14.87 | 15.75 | 16.54 | 17.19 | 17.89 | 18.51 | 18.91 |
| 50.06  | 11.08 | 12.15 | 13.19 | 14.27 | 15.10 | 15.99 | 16.81 | 17.58 | 18.20 | 18.72 | 19.33 |
| 53.01  | 10.99 | 12.13 | 13.19 | 14.21 | 15.28 | 16.03 | 16.83 | 17.52 | 18.23 | 18.82 | 19.33 |
| 56.20  | 11.32 | 12.38 | 13.57 | 14.52 | 15.38 | 16.30 | 17.09 | 17.79 | 18.40 | 19.08 | 19.67 |
| 59.64  | 11.64 | 12.67 | 13.77 | 14.77 | 15.81 | 16.67 | 17.42 | 18.17 | 18.89 | 19.50 | 19.96 |
| 63.34  | 11.25 | 12.23 | 13.32 | 14.30 | 15.22 | 16.12 | 16.88 | 17.64 | 18.26 | 18.86 | 19.40 |
| 67.34  | 11.54 | 12.59 | 13.69 | 14.64 | 15.57 | 16.50 | 17.32 | 18.01 | 18.72 | 19.31 | 19.87 |
| 71.65  | 11.79 | 12.82 | 13.93 | 14.96 | 15.89 | 16.85 | 17.69 | 18.40 | 19.09 | 19.65 | 20.19 |
| 76.30  | 11.78 | 12.85 | 14.03 | 14.98 | 16.04 | 16.82 | 17.64 | 18.43 | 19.03 | 19.67 | 20.27 |
| 81.32  | 12.16 | 13.31 | 14.34 | 15.40 | 16.40 | 17.25 | 18.13 | 18.88 | 19.53 | 20.15 | 20.70 |
| 86.73  | 12.30 | 13.40 | 14.43 | 15.54 | 16.50 | 17.43 | 18.31 | 19.00 | 19.78 | 20.34 | 20.92 |
| 92.56  | 12.37 | 13.58 | 14.60 | 15.65 | 16.73 | 17.58 | 18.52 | 19.25 | 19.90 | 20.50 | 21.06 |
| 98.85  | 12.28 | 13.28 | 14.46 | 15.45 | 16.50 | 17.44 | 18.27 | 18.98 | 19.63 | 20.32 | 20.84 |
| 105.64 | 12.73 | 13.88 | 14.90 | 16.04 | 16.92 | 17.87 | 18.78 | 19.45 | 20.23 | 20.83 | 21.45 |
| 112.96 | 12.94 | 14.03 | 15.18 | 16.24 | 17.25 | 18.16 | 19.02 | 19.83 | 20.53 | 21.16 | 21.74 |
| 120.85 | 12.96 | 14.11 | 15.26 | 16.36 | 17.31 | 18.16 | 19.04 | 19.92 | 20.56 | 21.24 | 21.85 |
| 129.36 | 13.25 | 14.43 | 15.50 | 16.60 | 17.71 | 18.61 | 19.50 | 20.24 | 20.98 | 21.61 | 22.31 |



|         |       |       |       |       |       |       |       |       |       |       |       |
|---------|-------|-------|-------|-------|-------|-------|-------|-------|-------|-------|-------|
| 138.55  | 13.47 | 14.55 | 15.64 | 16.70 | 17.80 | 18.77 | 19.57 | 20.46 | 21.11 | 21.81 | 22.35 |
| 148.45  | 13.42 | 14.50 | 15.60 | 16.65 | 17.69 | 18.62 | 19.48 | 20.26 | 21.06 | 21.72 | 22.32 |
| 159.13  | 13.66 | 14.75 | 15.91 | 16.98 | 18.04 | 19.01 | 19.83 | 20.66 | 21.39 | 22.06 | 22.63 |
| 170.65  | 13.92 | 14.99 | 16.19 | 17.32 | 18.29 | 19.28 | 20.13 | 20.93 | 21.69 | 22.33 | 22.87 |
| 183.07  | 14.27 | 15.44 | 16.58 | 17.61 | 18.68 | 19.67 | 20.50 | 21.31 | 22.12 | 22.81 | 23.41 |
| 196.47  | 14.30 | 15.50 | 16.62 | 17.77 | 18.78 | 19.72 | 20.62 | 21.43 | 22.19 | 22.84 | 23.50 |
| 210.91  | 14.67 | 15.79 | 16.96 | 18.12 | 19.10 | 20.13 | 21.07 | 21.87 | 22.53 | 23.23 | 23.89 |
| 226.50  | 14.94 | 16.04 | 17.19 | 18.30 | 19.27 | 20.41 | 21.23 | 22.02 | 22.80 | 23.46 | 24.14 |
| 243.31  | 14.96 | 16.19 | 17.36 | 18.43 | 19.45 | 20.48 | 21.37 | 22.21 | 22.99 | 23.61 | 24.25 |
| 261.43  | 15.49 | 16.70 | 17.86 | 18.94 | 20.04 | 21.09 | 21.95 | 22.79 | 23.56 | 24.22 | 24.96 |
| 280.98  | 15.53 | 16.80 | 17.95 | 19.02 | 20.11 | 21.07 | 22.05 | 22.85 | 23.65 | 24.38 | 24.97 |
| 302.07  | 15.75 | 17.01 | 18.17 | 19.26 | 20.30 | 21.31 | 22.18 | 23.08 | 23.81 | 24.50 | 25.16 |
| 324.81  | 16.11 | 17.31 | 18.48 | 19.62 | 20.71 | 21.68 | 22.69 | 23.51 | 24.27 | 25.00 | 25.69 |
| 349.33  | 16.35 | 17.46 | 18.70 | 19.87 | 20.89 | 21.84 | 22.91 | 23.68 | 24.48 | 25.20 | 25.87 |
| 375.79  | 16.60 | 17.78 | 19.02 | 20.16 | 21.25 | 22.29 | 23.17 | 24.06 | 24.80 | 25.55 | 26.19 |
| 404.31  | 16.63 | 17.78 | 19.02 | 20.20 | 21.20 | 22.32 | 23.16 | 24.05 | 24.87 | 25.58 | 26.22 |
| 435.08  | 17.02 | 18.21 | 19.45 | 20.58 | 21.66 | 22.65 | 23.56 | 24.49 | 25.20 | 26.04 | 26.68 |
| 468.27  | 17.17 | 18.27 | 19.58 | 20.71 | 21.78 | 22.91 | 23.80 | 24.65 | 25.40 | 26.16 | 26.88 |
| 504.06  | 17.53 | 18.71 | 19.98 | 21.14 | 22.28 | 23.26 | 24.22 | 25.11 | 25.89 | 26.58 | 27.35 |
| 542.66  | 17.68 | 18.85 | 20.05 | 21.21 | 22.25 | 23.28 | 24.35 | 25.12 | 26.00 | 26.72 | 27.35 |
| 584.29  | 17.90 | 19.10 | 20.28 | 21.43 | 22.67 | 23.62 | 24.65 | 25.40 | 26.27 | 26.89 | 27.62 |
| 629.18  | 18.10 | 19.35 | 20.62 | 21.71 | 22.80 | 23.81 | 24.80 | 25.67 | 26.48 | 27.21 | 27.89 |
| 677.61  | 18.48 | 19.67 | 20.94 | 22.12 | 23.27 | 24.31 | 25.35 | 26.13 | 26.95 | 27.75 | 28.42 |
| 729.83  | 18.55 | 19.65 | 20.95 | 22.12 | 23.20 | 24.28 | 25.22 | 26.04 | 26.97 | 27.63 | 28.36 |
| 786.16  | 18.71 | 19.97 | 21.18 | 22.39 | 23.46 | 24.58 | 25.45 | 26.42 | 27.28 | 27.98 | 28.65 |
| 846.90  | 18.71 | 19.97 | 21.21 | 22.40 | 23.55 | 24.59 | 25.48 | 26.41 | 27.24 | 28.04 | 28.70 |
| 912.42  | 19.02 | 20.24 | 21.44 | 22.62 | 23.76 | 24.87 | 25.73 | 26.64 | 27.45 | 28.26 | 28.93 |
| 983.08  | 19.04 | 20.38 | 21.58 | 22.76 | 23.96 | 24.96 | 26.04 | 26.86 | 27.61 | 28.38 | 29.08 |
| 1059.29 | 19.31 | 20.51 | 21.74 | 22.98 | 24.04 | 25.16 | 26.12 | 26.92 | 27.77 | 28.63 | 29.25 |
| 1141.48 | 19.18 | 20.46 | 21.71 | 22.92 | 24.01 | 25.02 | 26.07 | 26.96 | 27.76 | 28.57 | 29.22 |
| 1230.13 | 19.24 | 20.40 | 21.65 | 22.89 | 23.99 | 25.02 | 26.00 | 26.92 | 27.72 | 28.42 | 29.10 |
| 1325.73 | 19.45 | 20.61 | 21.84 | 23.04 | 24.17 | 25.25 | 26.25 | 27.09 | 27.90 | 28.67 | 29.34 |
| 1428.84 | 19.32 | 20.50 | 21.85 | 23.02 | 24.07 | 25.14 | 26.21 | 27.02 | 27.94 | 28.57 | 29.32 |
| 1540.05 | 19.53 | 20.77 | 22.03 | 23.19 | 24.28 | 25.35 | 26.43 | 27.34 | 28.08 | 28.86 | 29.56 |
| 1659.99 | 19.50 | 20.79 | 22.07 | 23.11 | 24.35 | 25.33 | 26.46 | 27.24 | 28.15 | 28.87 | 29.56 |
| 1789.34 | 19.45 | 20.64 | 21.93 | 23.19 | 24.21 | 25.24 | 26.29 | 27.15 | 27.99 | 28.75 | 29.47 |
| 1928.85 | 19.50 | 20.76 | 22.02 | 23.30 | 24.36 | 25.37 | 26.40 | 27.30 | 28.09 | 28.88 | 29.53 |
| 2079.31 | 19.52 | 20.75 | 22.02 | 23.15 | 24.31 | 25.47 | 26.32 | 27.27 | 27.98 | 28.73 | 29.43 |
| 2241.59 | 19.50 | 20.77 | 21.99 | 23.18 | 24.20 | 25.34 | 26.28 | 27.14 | 28.02 | 28.72 | 29.47 |
| 2416.60 | 19.47 | 20.61 | 21.95 | 23.04 | 24.17 | 25.34 | 26.31 | 27.17 | 27.93 | 28.71 | 29.42 |
| 2605.36 | 19.40 | 20.60 | 21.91 | 23.08 | 24.27 | 25.40 | 26.26 | 27.22 | 27.92 | 28.66 | 29.38 |
| 2808.94 | 19.38 | 20.61 | 21.84 | 23.02 | 24.10 | 25.13 | 26.14 | 27.03 | 27.80 | 28.55 | 29.19 |
| 3028.50 | 19.27 | 20.49 | 21.77 | 22.96 | 24.05 | 25.13 | 26.05 | 26.86 | 27.81 | 28.45 | 29.05 |
| 3265.30 | 19.23 | 20.50 | 21.75 | 22.87 | 24.01 | 25.13 | 26.05 | 26.91 | 27.78 | 28.51 | 29.11 |
| 3520.69 | 19.10 | 20.37 | 21.59 | 22.78 | 23.81 | 24.88 | 25.86 | 26.66 | 27.48 | 28.20 | 28.84 |
| 3796.13 | 19.07 | 20.23 | 21.51 | 22.69 | 23.77 | 24.85 | 25.73 | 26.54 | 27.45 | 28.07 | 28.64 |

| Wavelength (nm) \ Time (ps) | 569.06 | 570.48 | 571.91 | 573.33 | 574.75 | 576.18 | 577.60 | 579.03 | 580.45 | 581.87 | 583.30 |
|-----------------------------|--------|--------|--------|--------|--------|--------|--------|--------|--------|--------|--------|
| -3.78                       | -0.03  | -0.03  | -0.04  | -0.02  | -0.03  | 0.02   | 0.00   | -0.07  | 0.05   | -0.04  | 0.00   |
| -3.28                       | 0.00   | -0.01  | -0.02  | -0.01  | -0.01  | -0.06  | -0.05  | -0.03  | -0.06  | 0.08   | -0.03  |
| -2.78                       | 0.01   | -0.08  | 0.00   | -0.03  | 0.00   | 0.01   | 0.00   | -0.02  | 0.01   | 0.02   | -0.04  |
| -2.28                       | -0.03  | -0.01  | 0.04   | 0.03   | 0.05   | 0.04   | 0.06   | 0.00   | 0.05   | 0.05   | -0.02  |
| -1.78                       | -0.03  | 0.07   | -0.02  | 0.00   | -0.01  | -0.06  | 0.00   | 0.03   | -0.01  | 0.02   | 0.02   |
| -1.28                       | 0.10   | 0.02   | 0.01   | 0.02   | 0.04   | 0.03   | 0.05   | 0.04   | 0.05   | 0.03   | 0.05   |
| -0.78                       | -0.03  | 0.02   | 0.00   | 0.03   | -0.03  | 0.04   | 0.03   | 0.04   | -0.02  | -0.09  | -0.01  |
| -0.28                       | 0.01   | 0.01   | 0.02   | -0.02  | -0.01  | -0.01  | -0.09  | 0.03   | -0.06  | -0.06  | 0.03   |
| -0.18                       | -0.01  | 0.02   | 0.02   | 0.03   | -0.04  | 0.02   | 0.06   | 0.04   | 0.00   | -0.05  | 0.05   |
| -0.08                       | -0.07  | 0.02   | 0.00   | 0.01   | -0.02  | -0.02  | 0.01   | -0.04  | -0.04  | -0.01  | -0.02  |
| 0.02                        | 0.05   | -0.01  | 0.06   | 0.08   | 0.05   | 0.05   | 0.12   | 0.12   | 0.05   | 0.06   | 0.04   |
| 0.12                        | -0.07  | 0.06   | 0.06   | -0.02  | 0.05   | 0.05   | 0.08   | 0.05   | 0.07   | 0.06   | 0.03   |
| 0.22                        | -0.01  | 0.00   | 0.01   | 0.03   | -0.01  | 0.05   | 0.00   | -0.04  | 0.04   | 0.00   | -0.03  |
| 0.27                        | 0.06   | 0.03   | 0.11   | 0.09   | 0.06   | 0.06   | 0.03   | -0.01  | 0.00   | 0.03   | 0.00   |
| 0.32                        | 0.01   | 0.07   | 0.05   | 0.08   | 0.10   | 0.06   | 0.02   | 0.01   | -0.05  | -0.01  | 0.04   |
| 0.37                        | 0.02   | -0.03  | -0.05  | 0.02   | 0.04   | -0.02  | -0.01  | 0.01   | -0.05  | 0.04   | 0.02   |
| 0.42                        | -0.08  | -0.02  | 0.08   | 0.05   | 0.05   | 0.04   | 0.02   | -0.01  | 0.03   | 0.00   | 0.00   |
| 0.47                        | 0.03   | 0.00   | 0.01   | 0.04   | -0.05  | 0.07   | 0.01   | -0.01  | -0.01  | -0.02  | -0.06  |
| 0.52                        | -0.06  | -0.06  | -0.03  | 0.01   | 0.06   | 0.01   | 0.07   | -0.07  | 0.02   | -0.08  | -0.09  |
| 0.57                        | 0.07   | 0.07   | -0.01  | 0.06   | -0.01  | 0.03   | 0.06   | 0.01   | -0.01  | 0.07   | 0.08   |
| 0.62                        | 0.06   | -0.08  | -0.02  | -0.02  | -0.02  | 0.06   | -0.01  | -0.06  | -0.03  | -0.05  | -0.06  |
| 0.67                        | -0.03  | -0.05  | -0.01  | 0.05   | -0.04  | -0.01  | -0.01  | -0.02  | -0.02  | 0.03   | -0.04  |
| 0.72                        | 0.00   | -0.06  | -0.01  | 0.00   | 0.01   | 0.01   | 0.01   | -0.11  | -0.01  | 0.04   | 0.04   |
| 0.77                        | 0.00   | -0.03  | 0.00   | 0.03   | -0.01  | 0.03   | 0.00   | -0.01  | 0.04   | 0.02   | -0.06  |
| 0.82                        | -0.04  | 0.02   | -0.02  | 0.05   | -0.01  | 0.07   | -0.05  | -0.08  | -0.04  | -0.03  | 0.04   |
| 0.87                        | -0.02  | -0.03  | 0.03   | 0.01   | 0.00   | -0.02  | 0.02   | -0.02  | 0.03   | 0.00   | -0.03  |
| 0.92                        | -0.01  | 0.02   | -0.07  | 0.03   | 0.01   | -0.03  | 0.02   | 0.03   | -0.03  | 0.05   | 0.04   |
| 0.97                        | 0.01   | 0.00   | 0.01   | 0.02   | 0.05   | 0.08   | -0.06  | 0.04   | -0.02  | 0.03   | -0.05  |
| 1.02                        | 0.02   | 0.00   | 0.02   | 0.07   | 0.08   | 0.01   | 0.05   | 0.01   | -0.06  | 0.05   | -0.05  |
| 1.07                        | 0.03   | -0.06  | -0.01  | 0.09   | 0.00   | -0.02  | -0.01  | -0.09  | -0.02  | -0.05  | -0.10  |
| 1.12                        | -0.04  | 0.11   | 0.00   | -0.01  | 0.04   | 0.05   | -0.06  | -0.06  | 0.02   | 0.10   | -0.03  |
| 1.17                        | -0.19  | -0.11  | 0.08   | 0.16   | -0.05  | -0.07  | 0.00   | 0.09   | 0.08   | -0.05  | -0.14  |
| 1.22                        | -0.02  | 0.06   | 0.00   | -0.07  | 0.03   | 0.04   | 0.00   | -0.04  | -0.05  | -0.01  | -0.04  |
| 1.27                        | -0.90  | -1.35  | -1.48  | -1.46  | -1.19  | -0.69  | -0.32  | -0.02  | 0.19   | 0.03   | -0.24  |
| 1.32                        | -7.71  | -10.86 | -13.47 | -15.20 | -16.62 | -17.41 | -18.26 | -19.01 | -20.31 | -21.67 | -23.35 |
| 1.37                        | 91.91  | 99.31  | 103.99 | 107.48 | 108.44 | 107.90 | 105.86 | 103.06 | 99.06  | 94.80  | 89.46  |
| 1.42                        | -1.16  | -2.86  | -5.06  | -7.69  | -10.70 | -13.83 | -17.01 | -20.00 | -22.70 | -24.89 | -26.38 |
| 1.47                        | 7.41   | 8.49   | 9.39   | 10.29  | 11.02  | 11.69  | 12.34  | 12.76  | 13.35  | 13.68  | 14.00  |
| 1.52                        | 5.97   | 6.66   | 7.12   | 7.60   | 8.00   | 8.42   | 8.74   | 8.95   | 9.22   | 9.50   | 9.65   |
| 1.57                        | 5.21   | 5.79   | 6.31   | 6.78   | 7.25   | 7.62   | 8.01   | 8.37   | 8.67   | 9.02   | 9.24   |
| 1.62                        | 4.95   | 5.56   | 6.20   | 6.85   | 7.38   | 7.93   | 8.32   | 8.81   | 9.25   | 9.63   | 9.97   |
| 1.67                        | 6.17   | 6.53   | 7.02   | 7.44   | 7.74   | 8.05   | 8.34   | 8.50   | 8.78   | 8.95   | 9.07   |
| 1.72                        | 6.21   | 6.91   | 7.33   | 7.92   | 8.25   | 8.69   | 9.03   | 9.22   | 9.50   | 9.66   | 9.80   |
| 1.77                        | 6.93   | 7.20   | 7.56   | 7.91   | 8.19   | 8.44   | 8.70   | 8.88   | 9.14   | 9.23   | 9.41   |
| 1.82                        | 7.04   | 7.41   | 7.82   | 8.23   | 8.52   | 8.73   | 8.98   | 9.17   | 9.37   | 9.46   | 9.54   |
| 1.87                        | 8.06   | 8.47   | 8.98   | 9.34   | 9.76   | 10.08  | 10.40  | 10.70  | 10.88  | 10.96  | 11.09  |
| 1.92                        | 8.14   | 8.59   | 8.85   | 9.19   | 9.44   | 9.74   | 9.91   | 10.00  | 10.21  | 10.34  | 10.44  |

|      |       |       |       |       |       |       |       |       |       |       |       |
|------|-------|-------|-------|-------|-------|-------|-------|-------|-------|-------|-------|
| 1.97 | 8.73  | 9.00  | 9.43  | 9.78  | 10.08 | 10.23 | 10.44 | 10.41 | 10.55 | 10.64 | 10.70 |
| 2.02 | 8.41  | 8.79  | 9.20  | 9.57  | 9.84  | 10.13 | 10.34 | 10.42 | 10.71 | 10.91 | 10.98 |
| 2.07 | 9.33  | 9.68  | 10.01 | 10.31 | 10.47 | 10.68 | 10.87 | 10.87 | 11.05 | 11.09 | 11.26 |
| 2.12 | 9.11  | 9.59  | 9.97  | 10.33 | 10.57 | 10.69 | 10.92 | 11.02 | 11.12 | 11.19 | 11.22 |
| 2.17 | 9.01  | 9.32  | 9.61  | 9.89  | 10.11 | 10.33 | 10.53 | 10.62 | 10.71 | 10.76 | 10.88 |
| 2.22 | 10.01 | 10.34 | 10.73 | 10.95 | 11.11 | 11.38 | 11.48 | 11.57 | 11.59 | 11.58 | 11.63 |
| 2.27 | 10.37 | 10.85 | 11.21 | 11.47 | 11.69 | 12.00 | 12.20 | 12.18 | 12.41 | 12.51 | 12.45 |
| 2.32 | 10.09 | 10.36 | 10.72 | 10.95 | 11.14 | 11.28 | 11.45 | 11.48 | 11.48 | 11.52 | 11.54 |
| 2.37 | 10.63 | 10.97 | 11.26 | 11.60 | 11.70 | 11.84 | 12.00 | 12.03 | 12.10 | 12.08 | 12.02 |
| 2.42 | 10.74 | 11.09 | 11.35 | 11.71 | 11.95 | 12.19 | 12.31 | 12.38 | 12.47 | 12.50 | 12.46 |
| 2.47 | 11.06 | 11.46 | 11.66 | 11.95 | 12.13 | 12.26 | 12.39 | 12.49 | 12.58 | 12.48 | 12.56 |
| 2.52 | 11.36 | 11.62 | 12.00 | 12.27 | 12.39 | 12.66 | 12.70 | 12.73 | 12.74 | 12.75 | 12.63 |
| 2.57 | 11.32 | 11.84 | 11.99 | 12.32 | 12.48 | 12.61 | 12.80 | 12.85 | 12.97 | 12.99 | 13.00 |
| 2.62 | 11.82 | 12.15 | 12.49 | 12.74 | 12.92 | 13.01 | 13.14 | 13.13 | 13.10 | 13.15 | 13.10 |
| 2.67 | 11.44 | 11.83 | 12.15 | 12.43 | 12.59 | 12.82 | 12.81 | 12.88 | 12.94 | 12.90 | 12.89 |
| 2.72 | 11.88 | 12.24 | 12.53 | 12.73 | 12.93 | 13.11 | 13.12 | 13.15 | 13.07 | 13.12 | 13.09 |
| 2.77 | 12.02 | 12.32 | 12.58 | 12.84 | 12.99 | 13.12 | 13.20 | 13.26 | 13.23 | 13.20 | 13.11 |
| 2.82 | 12.08 | 12.37 | 12.73 | 12.94 | 13.14 | 13.36 | 13.37 | 13.49 | 13.39 | 13.42 | 13.40 |
| 2.87 | 12.15 | 12.42 | 12.68 | 12.89 | 12.97 | 13.18 | 13.15 | 13.23 | 13.25 | 13.24 | 13.11 |
| 2.92 | 12.68 | 13.04 | 13.39 | 13.58 | 13.69 | 13.85 | 13.98 | 14.04 | 14.00 | 14.00 | 13.83 |
| 2.97 | 12.44 | 12.73 | 13.01 | 13.25 | 13.43 | 13.61 | 13.63 | 13.69 | 13.75 | 13.67 | 13.53 |
| 3.02 | 12.86 | 13.22 | 13.53 | 13.84 | 14.02 | 14.04 | 14.11 | 14.16 | 14.19 | 14.12 | 14.00 |
| 3.07 | 12.53 | 12.93 | 13.20 | 13.40 | 13.62 | 13.71 | 13.83 | 13.73 | 13.86 | 13.68 | 13.71 |
| 3.12 | 12.64 | 13.08 | 13.34 | 13.61 | 13.83 | 13.89 | 13.96 | 13.92 | 13.92 | 13.98 | 13.87 |
| 3.17 | 12.95 | 13.34 | 13.58 | 13.79 | 13.88 | 14.04 | 14.11 | 14.04 | 14.05 | 13.95 | 13.86 |
| 3.22 | 13.31 | 13.61 | 13.97 | 14.32 | 14.48 | 14.62 | 14.69 | 14.67 | 14.71 | 14.64 | 14.62 |
| 3.42 | 13.73 | 14.09 | 14.40 | 14.66 | 14.84 | 14.85 | 14.99 | 14.98 | 14.95 | 14.88 | 14.79 |
| 3.62 | 14.03 | 14.50 | 14.79 | 15.00 | 15.23 | 15.33 | 15.42 | 15.39 | 15.48 | 15.40 | 15.35 |
| 3.82 | 14.09 | 14.50 | 14.80 | 14.97 | 15.17 | 15.22 | 15.33 | 15.39 | 15.28 | 15.22 | 15.13 |
| 4.02 | 14.55 | 14.91 | 15.20 | 15.49 | 15.64 | 15.78 | 15.83 | 15.81 | 15.88 | 15.80 | 15.69 |
| 4.22 | 14.34 | 14.87 | 14.99 | 15.31 | 15.42 | 15.54 | 15.65 | 15.55 | 15.54 | 15.53 | 15.40 |
| 4.42 | 14.65 | 15.08 | 15.34 | 15.57 | 15.84 | 15.94 | 15.97 | 15.98 | 15.97 | 15.86 | 15.78 |
| 4.62 | 15.02 | 15.38 | 15.66 | 15.94 | 16.10 | 16.23 | 16.29 | 16.30 | 16.28 | 16.17 | 16.05 |
| 4.82 | 14.96 | 15.33 | 15.62 | 16.00 | 16.18 | 16.16 | 16.28 | 16.22 | 16.24 | 16.15 | 16.03 |
| 5.02 | 15.28 | 15.57 | 15.96 | 16.25 | 16.42 | 16.55 | 16.58 | 16.57 | 16.56 | 16.42 | 16.41 |
| 5.22 | 15.40 | 15.81 | 16.10 | 16.38 | 16.52 | 16.67 | 16.71 | 16.76 | 16.73 | 16.63 | 16.58 |
| 5.42 | 15.54 | 15.92 | 16.23 | 16.55 | 16.70 | 16.84 | 16.82 | 16.91 | 16.81 | 16.71 | 16.65 |
| 5.62 | 15.77 | 16.13 | 16.42 | 16.73 | 16.81 | 17.02 | 17.05 | 17.06 | 17.01 | 16.95 | 16.94 |
| 5.82 | 15.79 | 16.13 | 16.44 | 16.72 | 16.83 | 17.01 | 17.06 | 17.01 | 17.00 | 16.96 | 16.82 |
| 6.02 | 15.96 | 16.41 | 16.64 | 16.84 | 17.16 | 17.22 | 17.27 | 17.30 | 17.18 | 17.11 | 17.04 |
| 6.22 | 15.98 | 16.34 | 16.56 | 16.86 | 17.05 | 17.10 | 17.25 | 17.19 | 17.17 | 16.99 | 16.91 |
| 6.42 | 16.04 | 16.44 | 16.76 | 17.02 | 17.21 | 17.28 | 17.41 | 17.37 | 17.33 | 17.27 | 17.09 |
| 6.62 | 16.48 | 16.92 | 17.21 | 17.56 | 17.64 | 17.76 | 17.91 | 17.78 | 17.77 | 17.63 | 17.56 |
| 6.82 | 16.33 | 16.73 | 17.03 | 17.30 | 17.46 | 17.59 | 17.68 | 17.60 | 17.58 | 17.45 | 17.36 |
| 7.02 | 16.65 | 17.03 | 17.35 | 17.65 | 17.84 | 17.97 | 17.97 | 18.02 | 17.96 | 17.77 | 17.74 |
| 7.22 | 16.52 | 16.88 | 17.27 | 17.51 | 17.68 | 17.82 | 17.86 | 17.89 | 17.84 | 17.71 | 17.61 |
| 7.42 | 16.76 | 17.18 | 17.62 | 17.83 | 17.95 | 18.13 | 18.14 | 18.15 | 18.13 | 18.01 | 17.93 |
| 7.62 | 16.73 | 17.06 | 17.36 | 17.69 | 17.94 | 17.88 | 17.96 | 17.94 | 17.92 | 17.87 | 17.74 |
| 7.82 | 16.72 | 17.17 | 17.48 | 17.82 | 17.84 | 18.05 | 18.07 | 18.02 | 18.00 | 17.96 | 17.77 |
| 8.02 | 16.64 | 17.07 | 17.36 | 17.67 | 17.84 | 17.90 | 17.97 | 17.97 | 17.92 | 17.76 | 17.65 |

|       |       |       |       |       |       |       |       |       |       |       |       |
|-------|-------|-------|-------|-------|-------|-------|-------|-------|-------|-------|-------|
| 8.22  | 16.72 | 17.10 | 17.47 | 17.75 | 17.87 | 17.94 | 18.03 | 18.02 | 17.98 | 17.85 | 17.74 |
| 8.42  | 16.59 | 17.02 | 17.25 | 17.55 | 17.71 | 17.81 | 17.92 | 17.93 | 17.79 | 17.69 | 17.55 |
| 8.62  | 16.85 | 17.28 | 17.60 | 17.87 | 17.97 | 18.14 | 18.18 | 18.16 | 18.18 | 18.04 | 17.94 |
| 8.82  | 17.14 | 17.46 | 17.85 | 18.11 | 18.26 | 18.36 | 18.35 | 18.30 | 18.38 | 18.25 | 18.14 |
| 9.02  | 16.80 | 17.20 | 17.49 | 17.75 | 17.94 | 17.97 | 18.03 | 18.01 | 18.08 | 17.87 | 17.81 |
| 9.22  | 16.97 | 17.36 | 17.76 | 17.98 | 18.12 | 18.19 | 18.23 | 18.21 | 18.18 | 18.05 | 17.93 |
| 9.42  | 17.21 | 17.48 | 17.87 | 18.17 | 18.31 | 18.46 | 18.44 | 18.41 | 18.35 | 18.31 | 18.14 |
| 9.62  | 17.11 | 17.41 | 17.74 | 17.98 | 18.25 | 18.30 | 18.34 | 18.30 | 18.26 | 18.14 | 18.01 |
| 9.82  | 17.23 | 17.61 | 18.01 | 18.24 | 18.28 | 18.54 | 18.51 | 18.51 | 18.42 | 18.36 | 18.26 |
| 10.02 | 17.09 | 17.40 | 17.81 | 18.04 | 18.26 | 18.31 | 18.38 | 18.37 | 18.32 | 18.19 | 17.97 |
| 10.22 | 17.25 | 17.68 | 18.00 | 18.34 | 18.51 | 18.56 | 18.63 | 18.60 | 18.57 | 18.42 | 18.28 |
| 10.42 | 17.35 | 17.83 | 18.01 | 18.27 | 18.49 | 18.65 | 18.76 | 18.62 | 18.52 | 18.47 | 18.36 |
| 10.62 | 17.38 | 17.75 | 18.13 | 18.45 | 18.48 | 18.63 | 18.64 | 18.61 | 18.62 | 18.42 | 18.33 |
| 10.82 | 17.26 | 17.62 | 17.92 | 18.19 | 18.39 | 18.44 | 18.53 | 18.51 | 18.46 | 18.26 | 18.24 |
| 11.02 | 17.32 | 17.69 | 18.00 | 18.33 | 18.47 | 18.55 | 18.64 | 18.51 | 18.55 | 18.45 | 18.27 |
| 11.22 | 17.18 | 17.50 | 17.84 | 18.09 | 18.26 | 18.36 | 18.41 | 18.36 | 18.34 | 18.20 | 18.07 |
| 11.42 | 17.09 | 17.40 | 17.69 | 17.97 | 18.06 | 18.23 | 18.20 | 18.18 | 18.11 | 18.02 | 17.87 |
| 11.62 | 17.32 | 17.67 | 17.99 | 18.29 | 18.42 | 18.53 | 18.61 | 18.58 | 18.50 | 18.42 | 18.34 |
| 11.82 | 17.32 | 17.72 | 17.96 | 18.30 | 18.47 | 18.58 | 18.54 | 18.55 | 18.53 | 18.43 | 18.20 |
| 12.02 | 17.49 | 17.76 | 18.08 | 18.30 | 18.45 | 18.58 | 18.65 | 18.63 | 18.53 | 18.42 | 18.29 |
| 12.22 | 17.60 | 17.88 | 18.21 | 18.48 | 18.64 | 18.76 | 18.90 | 18.93 | 18.83 | 18.64 | 18.51 |
| 12.42 | 17.21 | 17.58 | 17.87 | 18.22 | 18.30 | 18.39 | 18.48 | 18.41 | 18.39 | 18.24 | 18.08 |
| 12.62 | 17.36 | 17.75 | 18.08 | 18.35 | 18.55 | 18.53 | 18.65 | 18.61 | 18.65 | 18.42 | 18.31 |
| 12.82 | 17.33 | 17.68 | 18.04 | 18.33 | 18.43 | 18.55 | 18.63 | 18.56 | 18.49 | 18.42 | 18.30 |
| 13.02 | 17.63 | 17.98 | 18.38 | 18.67 | 18.79 | 18.88 | 18.99 | 18.94 | 18.93 | 18.79 | 18.63 |
| 13.22 | 17.51 | 17.89 | 18.24 | 18.49 | 18.70 | 18.75 | 18.83 | 18.73 | 18.67 | 18.57 | 18.42 |
| 13.42 | 17.54 | 17.82 | 18.13 | 18.48 | 18.58 | 18.69 | 18.76 | 18.69 | 18.69 | 18.52 | 18.42 |
| 13.50 | 17.47 | 17.78 | 18.14 | 18.42 | 18.55 | 18.67 | 18.74 | 18.66 | 18.51 | 18.44 | 18.33 |
| 13.59 | 17.69 | 18.04 | 18.45 | 18.68 | 18.84 | 18.96 | 18.92 | 18.95 | 18.84 | 18.82 | 18.59 |
| 13.68 | 17.52 | 17.90 | 18.23 | 18.47 | 18.51 | 18.65 | 18.77 | 18.70 | 18.65 | 18.58 | 18.36 |
| 13.78 | 17.23 | 17.60 | 17.91 | 18.21 | 18.36 | 18.48 | 18.53 | 18.47 | 18.38 | 18.23 | 18.13 |
| 13.88 | 17.44 | 17.84 | 18.17 | 18.40 | 18.57 | 18.69 | 18.69 | 18.63 | 18.67 | 18.50 | 18.41 |
| 14.00 | 17.72 | 18.08 | 18.43 | 18.71 | 18.88 | 19.00 | 19.03 | 18.97 | 18.89 | 18.83 | 18.66 |
| 14.12 | 17.62 | 18.00 | 18.31 | 18.59 | 18.75 | 18.89 | 18.83 | 18.84 | 18.78 | 18.61 | 18.52 |
| 14.25 | 17.48 | 17.80 | 18.19 | 18.41 | 18.45 | 18.66 | 18.77 | 18.68 | 18.52 | 18.43 | 18.28 |
| 14.40 | 17.94 | 18.26 | 18.64 | 18.81 | 19.08 | 19.21 | 19.21 | 19.18 | 19.09 | 19.01 | 18.85 |
| 14.55 | 17.49 | 17.88 | 18.19 | 18.46 | 18.55 | 18.67 | 18.69 | 18.83 | 18.66 | 18.51 | 18.42 |
| 14.72 | 17.71 | 18.03 | 18.36 | 18.57 | 18.79 | 18.93 | 18.84 | 18.77 | 18.77 | 18.61 | 18.52 |
| 14.90 | 17.50 | 17.88 | 18.16 | 18.46 | 18.54 | 18.65 | 18.77 | 18.67 | 18.66 | 18.54 | 18.32 |
| 15.09 | 17.48 | 17.83 | 18.12 | 18.46 | 18.55 | 18.74 | 18.72 | 18.64 | 18.51 | 18.51 | 18.28 |
| 15.30 | 17.61 | 18.01 | 18.39 | 18.63 | 18.77 | 18.86 | 18.90 | 18.82 | 18.84 | 18.72 | 18.69 |
| 15.53 | 17.97 | 18.39 | 18.69 | 18.94 | 19.24 | 19.24 | 19.23 | 19.27 | 19.18 | 19.14 | 18.91 |
| 15.77 | 17.77 | 18.00 | 18.39 | 18.63 | 18.74 | 18.97 | 19.04 | 19.00 | 18.91 | 18.74 | 18.62 |
| 16.04 | 17.91 | 18.29 | 18.61 | 18.87 | 19.06 | 19.15 | 19.16 | 19.19 | 19.10 | 18.99 | 18.86 |
| 16.32 | 17.83 | 18.20 | 18.42 | 18.83 | 18.97 | 18.99 | 19.06 | 19.01 | 18.94 | 18.88 | 18.71 |
| 16.63 | 18.09 | 18.47 | 18.83 | 18.97 | 19.19 | 19.25 | 19.32 | 19.29 | 19.25 | 19.13 | 18.99 |
| 16.96 | 18.13 | 18.48 | 18.78 | 19.14 | 19.22 | 19.28 | 19.38 | 19.48 | 19.34 | 19.24 | 19.09 |
| 17.31 | 18.02 | 18.29 | 18.63 | 18.91 | 19.16 | 19.18 | 19.17 | 19.18 | 19.09 | 18.90 | 18.86 |
| 17.70 | 18.38 | 18.82 | 19.10 | 19.36 | 19.53 | 19.66 | 19.59 | 19.65 | 19.58 | 19.44 | 19.39 |
| 18.11 | 17.64 | 17.99 | 18.29 | 18.59 | 18.69 | 18.84 | 18.88 | 18.79 | 18.77 | 18.69 | 18.55 |

|        |       |       |       |       |       |       |       |       |       |       |       |
|--------|-------|-------|-------|-------|-------|-------|-------|-------|-------|-------|-------|
| 18.56  | 17.91 | 18.29 | 18.64 | 18.88 | 19.04 | 19.17 | 19.20 | 19.21 | 19.12 | 18.99 | 18.88 |
| 19.04  | 17.96 | 18.33 | 18.64 | 18.93 | 19.11 | 19.27 | 19.26 | 19.14 | 19.15 | 19.10 | 18.91 |
| 19.56  | 18.29 | 18.66 | 19.05 | 19.25 | 19.50 | 19.63 | 19.60 | 19.55 | 19.52 | 19.40 | 19.26 |
| 20.12  | 18.28 | 18.63 | 19.01 | 19.26 | 19.39 | 19.55 | 19.57 | 19.58 | 19.59 | 19.38 | 19.21 |
| 20.72  | 18.40 | 18.76 | 19.15 | 19.48 | 19.56 | 19.62 | 19.65 | 19.69 | 19.65 | 19.58 | 19.39 |
| 21.37  | 18.42 | 18.74 | 19.07 | 19.32 | 19.51 | 19.65 | 19.72 | 19.63 | 19.57 | 19.46 | 19.38 |
| 22.08  | 18.36 | 18.78 | 19.07 | 19.39 | 19.48 | 19.61 | 19.67 | 19.65 | 19.61 | 19.52 | 19.39 |
| 22.84  | 18.53 | 18.94 | 19.17 | 19.54 | 19.73 | 19.80 | 19.88 | 19.85 | 19.81 | 19.78 | 19.54 |
| 23.65  | 18.17 | 18.59 | 18.87 | 19.11 | 19.26 | 19.38 | 19.34 | 19.37 | 19.32 | 19.20 | 19.10 |
| 24.54  | 18.65 | 19.02 | 19.32 | 19.58 | 19.78 | 19.92 | 19.95 | 19.90 | 19.88 | 19.73 | 19.52 |
| 25.49  | 18.89 | 19.22 | 19.57 | 19.79 | 20.03 | 20.13 | 20.14 | 20.11 | 20.15 | 19.94 | 19.81 |
| 26.51  | 18.30 | 18.67 | 19.01 | 19.23 | 19.38 | 19.49 | 19.54 | 19.52 | 19.52 | 19.46 | 19.22 |
| 27.62  | 18.97 | 19.37 | 19.73 | 20.02 | 20.18 | 20.25 | 20.34 | 20.28 | 20.17 | 20.14 | 20.00 |
| 28.81  | 18.98 | 19.33 | 19.61 | 19.93 | 20.10 | 20.20 | 20.29 | 20.28 | 20.20 | 20.09 | 19.92 |
| 30.10  | 18.58 | 18.96 | 19.30 | 19.56 | 19.73 | 19.89 | 19.95 | 19.90 | 19.81 | 19.65 | 19.60 |
| 31.49  | 19.24 | 19.62 | 19.93 | 20.15 | 20.36 | 20.49 | 20.53 | 20.51 | 20.52 | 20.42 | 20.24 |
| 32.98  | 19.00 | 19.32 | 19.68 | 20.02 | 20.10 | 20.30 | 20.33 | 20.24 | 20.27 | 20.16 | 20.00 |
| 34.60  | 19.39 | 19.80 | 20.16 | 20.41 | 20.55 | 20.72 | 20.81 | 20.82 | 20.76 | 20.61 | 20.47 |
| 36.34  | 19.26 | 19.62 | 19.99 | 20.29 | 20.46 | 20.59 | 20.59 | 20.62 | 20.54 | 20.41 | 20.25 |
| 38.21  | 19.77 | 20.12 | 20.50 | 20.76 | 21.01 | 21.07 | 21.15 | 21.18 | 21.12 | 21.06 | 20.94 |
| 40.24  | 19.55 | 19.98 | 20.29 | 20.54 | 20.75 | 20.86 | 20.87 | 20.92 | 20.88 | 20.74 | 20.62 |
| 42.42  | 19.28 | 19.68 | 20.04 | 20.31 | 20.41 | 20.66 | 20.70 | 20.51 | 20.60 | 20.51 | 20.37 |
| 44.78  | 19.42 | 19.73 | 20.14 | 20.44 | 20.68 | 20.76 | 20.77 | 20.79 | 20.78 | 20.79 | 20.53 |
| 47.32  | 19.44 | 19.83 | 20.12 | 20.48 | 20.65 | 20.71 | 20.79 | 20.82 | 20.74 | 20.68 | 20.52 |
| 50.06  | 19.78 | 20.12 | 20.54 | 20.84 | 20.96 | 21.13 | 21.21 | 21.15 | 21.20 | 21.03 | 20.96 |
| 53.01  | 19.72 | 20.23 | 20.54 | 20.92 | 20.93 | 21.19 | 21.26 | 21.22 | 21.21 | 21.11 | 20.97 |
| 56.20  | 20.09 | 20.47 | 20.87 | 21.12 | 21.42 | 21.38 | 21.54 | 21.55 | 21.56 | 21.41 | 21.25 |
| 59.64  | 20.59 | 20.96 | 21.29 | 21.53 | 21.75 | 21.94 | 21.98 | 21.95 | 22.01 | 21.90 | 21.75 |
| 63.34  | 19.91 | 20.27 | 20.62 | 20.89 | 21.06 | 21.26 | 21.39 | 21.33 | 21.31 | 21.19 | 21.11 |
| 67.34  | 20.31 | 20.71 | 21.08 | 21.39 | 21.59 | 21.71 | 21.84 | 21.80 | 21.74 | 21.70 | 21.56 |
| 71.65  | 20.72 | 21.17 | 21.51 | 21.83 | 21.97 | 22.18 | 22.31 | 22.26 | 22.21 | 22.14 | 22.07 |
| 76.30  | 20.64 | 21.14 | 21.50 | 21.78 | 21.93 | 22.19 | 22.25 | 22.23 | 22.30 | 22.22 | 22.03 |
| 81.32  | 21.17 | 21.66 | 21.99 | 22.27 | 22.57 | 22.74 | 22.80 | 22.84 | 22.88 | 22.79 | 22.65 |
| 86.73  | 21.45 | 21.83 | 22.25 | 22.58 | 22.80 | 22.92 | 23.03 | 23.08 | 23.05 | 22.93 | 22.88 |
| 92.56  | 21.54 | 22.04 | 22.40 | 22.73 | 22.97 | 23.13 | 23.20 | 23.24 | 23.21 | 23.18 | 23.06 |
| 98.85  | 21.24 | 21.64 | 22.15 | 22.40 | 22.74 | 22.83 | 22.91 | 23.00 | 22.94 | 22.92 | 22.87 |
| 105.64 | 22.00 | 22.40 | 22.83 | 23.15 | 23.37 | 23.51 | 23.67 | 23.66 | 23.71 | 23.60 | 23.56 |
| 112.96 | 22.27 | 22.71 | 23.08 | 23.43 | 23.72 | 23.81 | 23.95 | 23.96 | 23.95 | 23.96 | 23.85 |
| 120.85 | 22.31 | 22.79 | 23.15 | 23.46 | 23.69 | 23.94 | 23.94 | 24.08 | 24.08 | 24.03 | 23.90 |
| 129.36 | 22.79 | 23.22 | 23.59 | 23.90 | 24.20 | 24.40 | 24.50 | 24.45 | 24.50 | 24.59 | 24.41 |
| 138.55 | 22.88 | 23.37 | 23.74 | 24.08 | 24.37 | 24.50 | 24.62 | 24.77 | 24.77 | 24.75 | 24.65 |
| 148.45 | 22.78 | 23.24 | 23.62 | 24.02 | 24.31 | 24.44 | 24.53 | 24.61 | 24.59 | 24.58 | 24.45 |
| 159.13 | 23.14 | 23.64 | 24.07 | 24.38 | 24.69 | 24.78 | 24.89 | 24.95 | 25.01 | 24.90 | 24.94 |
| 170.65 | 23.49 | 23.88 | 24.36 | 24.69 | 24.99 | 25.14 | 25.25 | 25.41 | 25.45 | 25.40 | 25.31 |
| 183.07 | 23.89 | 24.45 | 24.81 | 25.22 | 25.43 | 25.69 | 25.80 | 25.87 | 25.90 | 25.92 | 25.77 |
| 196.47 | 24.00 | 24.51 | 24.82 | 25.27 | 25.48 | 25.79 | 25.91 | 25.97 | 25.96 | 25.94 | 25.85 |
| 210.91 | 24.44 | 24.95 | 25.31 | 25.72 | 25.99 | 26.26 | 26.34 | 26.45 | 26.40 | 26.49 | 26.42 |
| 226.50 | 24.65 | 25.11 | 25.59 | 25.91 | 26.19 | 26.36 | 26.61 | 26.63 | 26.69 | 26.61 | 26.67 |
| 243.31 | 24.82 | 25.25 | 25.72 | 26.10 | 26.40 | 26.60 | 26.75 | 26.79 | 26.93 | 26.89 | 26.81 |
| 261.43 | 25.49 | 25.97 | 26.39 | 26.84 | 27.02 | 27.30 | 27.54 | 27.61 | 27.67 | 27.65 | 27.59 |

|         |       |       |       |       |       |       |       |       |       |       |       |
|---------|-------|-------|-------|-------|-------|-------|-------|-------|-------|-------|-------|
| 280.98  | 25.50 | 25.99 | 26.46 | 26.78 | 27.13 | 27.34 | 27.40 | 27.58 | 27.65 | 27.68 | 27.59 |
| 302.07  | 25.77 | 26.26 | 26.57 | 27.07 | 27.29 | 27.55 | 27.71 | 27.85 | 27.91 | 27.85 | 27.87 |
| 324.81  | 26.24 | 26.73 | 27.12 | 27.55 | 27.82 | 28.05 | 28.26 | 28.35 | 28.40 | 28.36 | 28.44 |
| 349.33  | 26.51 | 26.90 | 27.30 | 27.73 | 28.02 | 28.19 | 28.42 | 28.59 | 28.62 | 28.68 | 28.57 |
| 375.79  | 26.74 | 27.33 | 27.76 | 28.10 | 28.34 | 28.66 | 28.82 | 28.90 | 29.05 | 29.05 | 29.06 |
| 404.31  | 26.83 | 27.31 | 27.75 | 28.13 | 28.41 | 28.66 | 28.79 | 28.99 | 29.00 | 29.02 | 28.97 |
| 435.08  | 27.14 | 27.71 | 28.20 | 28.66 | 28.90 | 29.18 | 29.35 | 29.39 | 29.58 | 29.62 | 29.57 |
| 468.27  | 27.48 | 27.96 | 28.36 | 28.83 | 29.03 | 29.38 | 29.52 | 29.67 | 29.72 | 29.70 | 29.74 |
| 504.06  | 27.91 | 28.47 | 28.80 | 29.24 | 29.57 | 29.85 | 30.02 | 30.15 | 30.18 | 30.17 | 30.17 |
| 542.66  | 28.00 | 28.54 | 28.96 | 29.29 | 29.58 | 29.81 | 30.09 | 30.18 | 30.26 | 30.35 | 30.29 |
| 584.29  | 28.29 | 28.74 | 29.23 | 29.61 | 29.84 | 30.11 | 30.32 | 30.44 | 30.62 | 30.61 | 30.53 |
| 629.18  | 28.43 | 28.94 | 29.43 | 29.83 | 30.20 | 30.31 | 30.65 | 30.74 | 30.78 | 30.79 | 30.81 |
| 677.61  | 28.90 | 29.52 | 29.99 | 30.37 | 30.67 | 31.02 | 31.20 | 31.31 | 31.35 | 31.39 | 31.43 |
| 729.83  | 28.92 | 29.41 | 29.94 | 30.30 | 30.53 | 30.89 | 31.08 | 31.14 | 31.16 | 31.29 | 31.30 |
| 786.16  | 29.25 | 29.77 | 30.23 | 30.60 | 30.93 | 31.20 | 31.36 | 31.53 | 31.56 | 31.68 | 31.64 |
| 846.90  | 29.26 | 29.81 | 30.25 | 30.64 | 30.90 | 31.23 | 31.41 | 31.52 | 31.57 | 31.67 | 31.60 |
| 912.42  | 29.55 | 30.06 | 30.46 | 30.95 | 31.23 | 31.52 | 31.56 | 31.82 | 31.85 | 31.90 | 31.88 |
| 983.08  | 29.67 | 30.20 | 30.65 | 31.10 | 31.30 | 31.58 | 31.77 | 31.89 | 31.95 | 32.09 | 31.99 |
| 1059.29 | 29.86 | 30.34 | 30.84 | 31.20 | 31.59 | 31.84 | 31.99 | 32.11 | 32.21 | 32.26 | 32.17 |
| 1141.48 | 29.77 | 30.26 | 30.72 | 31.13 | 31.46 | 31.66 | 31.81 | 32.02 | 32.12 | 32.09 | 32.09 |
| 1230.13 | 29.70 | 30.19 | 30.60 | 31.08 | 31.28 | 31.63 | 31.83 | 32.02 | 32.00 | 32.00 | 32.06 |
| 1325.73 | 29.90 | 30.41 | 30.91 | 31.28 | 31.58 | 31.81 | 32.01 | 32.15 | 32.24 | 32.24 | 32.21 |
| 1428.84 | 29.86 | 30.36 | 30.82 | 31.27 | 31.54 | 31.76 | 31.98 | 32.07 | 32.17 | 32.19 | 32.15 |
| 1540.05 | 30.02 | 30.59 | 31.04 | 31.49 | 31.78 | 32.01 | 32.21 | 32.30 | 32.36 | 32.38 | 32.36 |
| 1659.99 | 30.11 | 30.61 | 31.10 | 31.49 | 31.75 | 31.99 | 32.21 | 32.28 | 32.37 | 32.37 | 32.31 |
| 1789.34 | 30.01 | 30.50 | 30.94 | 31.30 | 31.61 | 31.83 | 32.02 | 32.12 | 32.20 | 32.23 | 32.18 |
| 1928.85 | 30.07 | 30.56 | 31.05 | 31.37 | 31.62 | 31.94 | 32.08 | 32.22 | 32.20 | 32.31 | 32.28 |
| 2079.31 | 30.05 | 30.56 | 30.89 | 31.41 | 31.64 | 31.90 | 31.95 | 32.14 | 32.17 | 32.17 | 32.19 |
| 2241.59 | 29.94 | 30.47 | 30.87 | 31.24 | 31.51 | 31.75 | 31.94 | 32.01 | 32.09 | 32.11 | 32.10 |
| 2416.60 | 29.87 | 30.39 | 30.83 | 31.23 | 31.44 | 31.69 | 31.78 | 31.93 | 32.03 | 32.04 | 32.01 |
| 2605.36 | 29.85 | 30.38 | 30.82 | 31.21 | 31.47 | 31.60 | 31.80 | 31.87 | 31.96 | 32.03 | 31.99 |
| 2808.94 | 29.74 | 30.23 | 30.61 | 31.00 | 31.29 | 31.48 | 31.65 | 31.73 | 31.83 | 31.86 | 31.77 |
| 3028.50 | 29.71 | 30.11 | 30.46 | 30.82 | 31.07 | 31.33 | 31.45 | 31.50 | 31.62 | 31.63 | 31.54 |
| 3265.30 | 29.62 | 30.07 | 30.45 | 30.87 | 31.05 | 31.37 | 31.52 | 31.51 | 31.59 | 31.53 | 31.59 |
| 3520.69 | 29.34 | 29.82 | 30.21 | 30.54 | 30.78 | 30.98 | 31.15 | 31.21 | 31.31 | 31.25 | 31.22 |
| 3796.13 | 29.20 | 29.61 | 30.06 | 30.48 | 30.62 | 30.73 | 30.93 | 31.04 | 31.10 | 31.08 | 31.04 |

| Wavelength (nm) \ Time (ps) | 584.72 | 586.15 | 587.57 | 588.99 | 590.42 | 591.84 | 593.27 | 594.69 | 596.12 | 597.54 | 598.96 |
|-----------------------------|--------|--------|--------|--------|--------|--------|--------|--------|--------|--------|--------|
| -3.78                       | 0.04   | 0.01   | -0.03  | -0.07  | -0.07  | -0.02  | -0.03  | -0.03  | -0.01  | -0.01  | -0.01  |
| -3.28                       | -0.04  | -0.02  | 0.03   | -0.04  | -0.05  | 0.05   | -0.03  | 0.06   | -0.02  | -0.05  | 0.06   |
| -2.78                       | 0.00   | -0.03  | -0.01  | 0.01   | 0.09   | -0.04  | -0.01  | -0.01  | -0.02  | 0.01   | 0.01   |
| -2.28                       | 0.02   | 0.00   | -0.01  | -0.02  | 0.03   | -0.02  | 0.02   | 0.04   | -0.01  | 0.04   | 0.02   |
| -1.78                       | -0.02  | 0.06   | 0.03   | 0.05   | 0.00   | 0.03   | 0.02   | -0.01  | 0.03   | 0.04   | -0.04  |
| -1.28                       | -0.07  | 0.02   | 0.05   | -0.01  | -0.05  | 0.00   | 0.03   | -0.03  | 0.03   | -0.04  | 0.00   |
| -0.78                       | 0.01   | 0.03   | 0.02   | 0.05   | -0.02  | -0.01  | 0.00   | 0.02   | -0.01  | 0.04   | 0.00   |
| -0.28                       | 0.05   | -0.07  | -0.09  | 0.04   | 0.06   | 0.02   | 0.00   | -0.04  | 0.00   | -0.04  | -0.04  |
| -0.18                       | 0.03   | 0.00   | 0.03   | 0.00   | -0.03  | 0.11   | -0.01  | -0.03  | -0.04  | 0.04   | 0.02   |

|       |        |        |        |        |        |        |        |        |        |        |        |
|-------|--------|--------|--------|--------|--------|--------|--------|--------|--------|--------|--------|
| -0.08 | 0.00   | -0.07  | -0.02  | 0.02   | -0.01  | -0.08  | 0.04   | -0.02  | 0.00   | -0.03  | -0.03  |
| 0.02  | -0.04  | 0.01   | 0.00   | 0.05   | 0.03   | 0.08   | 0.05   | 0.05   | 0.03   | 0.06   | 0.11   |
| 0.12  | 0.04   | 0.08   | 0.05   | -0.01  | 0.08   | 0.04   | 0.00   | 0.03   | -0.04  | 0.11   | 0.06   |
| 0.22  | -0.09  | -0.02  | -0.01  | 0.03   | -0.07  | 0.00   | 0.01   | -0.01  | 0.05   | -0.06  | -0.06  |
| 0.27  | -0.01  | 0.09   | -0.01  | -0.04  | 0.01   | -0.01  | 0.07   | 0.01   | -0.02  | 0.08   | -0.05  |
| 0.32  | 0.08   | 0.07   | -0.01  | 0.03   | 0.10   | 0.02   | -0.02  | 0.07   | 0.01   | 0.07   | 0.06   |
| 0.37  | -0.09  | 0.03   | 0.00   | -0.03  | 0.01   | 0.01   | -0.01  | 0.00   | 0.03   | 0.00   | 0.05   |
| 0.42  | -0.05  | -0.01  | -0.08  | -0.01  | -0.01  | 0.01   | -0.06  | -0.10  | 0.03   | 0.01   | 0.07   |
| 0.47  | 0.04   | -0.02  | 0.07   | 0.04   | 0.01   | -0.04  | 0.05   | 0.04   | 0.06   | 0.04   | 0.06   |
| 0.52  | -0.03  | 0.03   | 0.01   | 0.01   | 0.03   | 0.04   | -0.04  | -0.09  | -0.05  | -0.02  | -0.06  |
| 0.57  | 0.03   | 0.06   | 0.06   | 0.04   | 0.05   | 0.05   | 0.02   | 0.00   | 0.01   | 0.04   | 0.11   |
| 0.62  | 0.03   | 0.07   | -0.05  | 0.06   | -0.03  | 0.09   | 0.05   | 0.01   | 0.03   | -0.03  | -0.05  |
| 0.67  | 0.01   | -0.06  | 0.01   | -0.05  | 0.01   | -0.01  | 0.05   | 0.02   | -0.04  | 0.01   | -0.01  |
| 0.72  | -0.11  | -0.02  | -0.05  | 0.01   | 0.01   | -0.06  | 0.00   | 0.02   | -0.08  | 0.01   | -0.01  |
| 0.77  | 0.01   | 0.07   | 0.00   | -0.01  | 0.02   | 0.07   | 0.01   | 0.04   | 0.00   | 0.02   | 0.05   |
| 0.82  | -0.07  | 0.04   | 0.00   | 0.04   | 0.05   | 0.03   | 0.06   | -0.05  | 0.01   | -0.03  | 0.02   |
| 0.87  | 0.04   | 0.07   | -0.02  | -0.03  | -0.01  | 0.04   | 0.02   | -0.06  | 0.01   | 0.04   | -0.02  |
| 0.92  | -0.02  | -0.01  | 0.02   | 0.06   | 0.03   | -0.02  | -0.09  | 0.06   | -0.02  | -0.04  | 0.00   |
| 0.97  | 0.00   | 0.02   | -0.04  | -0.04  | 0.01   | 0.08   | -0.02  | -0.02  | 0.01   | 0.02   | -0.02  |
| 1.02  | -0.01  | 0.06   | -0.02  | 0.04   | 0.03   | 0.08   | 0.08   | 0.03   | -0.03  | 0.00   | -0.07  |
| 1.07  | -0.05  | -0.03  | -0.03  | 0.00   | 0.05   | 0.04   | -0.03  | 0.06   | -0.01  | -0.04  | -0.03  |
| 1.12  | -0.06  | 0.01   | -0.04  | -0.04  | -0.02  | 0.06   | 0.04   | 0.03   | 0.01   | 0.02   | 0.05   |
| 1.17  | -0.03  | 0.07   | 0.06   | -0.03  | -0.02  | -0.05  | 0.01   | 0.08   | 0.02   | -0.05  | -0.03  |
| 1.22  | -0.07  | -0.08  | 0.00   | 0.00   | 0.01   | -0.06  | -0.06  | 0.03   | 0.04   | 0.01   | -0.04  |
| 1.27  | -0.40  | -0.45  | -0.49  | -0.49  | -0.38  | -0.25  | -0.06  | 0.10   | 0.21   | 0.26   | 0.16   |
| 1.32  | -25.12 | -26.73 | -28.07 | -28.79 | -28.68 | -27.92 | -26.23 | -23.84 | -20.83 | -17.31 | -13.39 |
| 1.37  | 84.47  | 79.38  | 72.80  | 66.50  | 59.99  | 52.58  | 44.59  | 36.99  | 28.76  | 21.28  | 14.25  |
| 1.42  | -27.28 | -27.20 | -26.50 | -24.86 | -22.46 | -19.49 | -16.05 | -12.03 | -7.77  | -3.02  | 1.97   |
| 1.47  | 14.27  | 14.54  | 14.55  | 14.57  | 14.52  | 14.34  | 14.14  | 13.88  | 13.46  | 13.10  | 12.81  |
| 1.52  | 9.89   | 10.15  | 10.39  | 10.66  | 11.00  | 11.30  | 11.62  | 12.00  | 12.41  | 12.75  | 13.20  |
| 1.57  | 9.42   | 9.72   | 9.85   | 10.02  | 10.18  | 10.27  | 10.47  | 10.59  | 10.73  | 10.96  | 11.17  |
| 1.62  | 10.31  | 10.69  | 10.84  | 11.15  | 11.46  | 11.66  | 11.79  | 11.97  | 11.95  | 11.97  | 11.92  |
| 1.67  | 9.28   | 9.44   | 9.63   | 9.76   | 9.92   | 10.20  | 10.37  | 10.64  | 10.84  | 11.09  | 11.34  |
| 1.72  | 9.91   | 10.17  | 10.14  | 10.17  | 10.26  | 10.36  | 10.31  | 10.37  | 10.31  | 10.35  | 10.46  |
| 1.77  | 9.60   | 9.85   | 9.97   | 10.22  | 10.34  | 10.69  | 10.78  | 11.04  | 11.17  | 11.34  | 11.54  |
| 1.82  | 9.65   | 9.87   | 9.89   | 10.07  | 10.14  | 10.21  | 10.38  | 10.44  | 10.69  | 10.78  | 11.01  |
| 1.87  | 11.30  | 11.42  | 11.45  | 11.52  | 11.58  | 11.65  | 11.71  | 11.58  | 11.59  | 11.57  | 11.59  |
| 1.92  | 10.56  | 10.77  | 10.89  | 11.06  | 11.20  | 11.32  | 11.53  | 11.75  | 11.88  | 12.16  | 12.20  |
| 1.97  | 10.65  | 10.76  | 10.72  | 10.71  | 10.80  | 10.81  | 10.91  | 10.92  | 10.96  | 10.99  | 11.18  |
| 2.02  | 11.10  | 11.35  | 11.48  | 11.52  | 11.64  | 11.81  | 11.90  | 12.04  | 12.03  | 12.04  | 12.11  |
| 2.07  | 11.27  | 11.38  | 11.42  | 11.44  | 11.59  | 11.81  | 11.83  | 11.90  | 12.06  | 12.17  | 12.34  |
| 2.12  | 11.18  | 11.36  | 11.25  | 11.27  | 11.39  | 11.36  | 11.36  | 11.29  | 11.27  | 11.35  | 11.40  |
| 2.17  | 10.90  | 11.13  | 11.16  | 11.19  | 11.32  | 11.44  | 11.52  | 11.52  | 11.61  | 11.65  | 11.59  |
| 2.22  | 11.65  | 11.66  | 11.67  | 11.69  | 11.82  | 11.82  | 11.83  | 11.86  | 11.99  | 12.01  | 12.09  |
| 2.27  | 12.46  | 12.59  | 12.61  | 12.56  | 12.57  | 12.50  | 12.55  | 12.54  | 12.44  | 12.42  | 12.44  |
| 2.32  | 11.59  | 11.65  | 11.67  | 11.73  | 11.84  | 11.91  | 11.98  | 12.00  | 12.11  | 12.17  | 12.26  |
| 2.37  | 11.96  | 12.07  | 12.01  | 12.02  | 12.02  | 12.01  | 11.97  | 12.03  | 11.96  | 11.98  | 12.07  |
| 2.42  | 12.52  | 12.54  | 12.58  | 12.47  | 12.52  | 12.49  | 12.55  | 12.47  | 12.38  | 12.40  | 12.31  |
| 2.47  | 12.61  | 12.58  | 12.62  | 12.64  | 12.67  | 12.79  | 12.85  | 12.84  | 12.88  | 12.96  | 12.97  |
| 2.52  | 12.67  | 12.72  | 12.51  | 12.49  | 12.54  | 12.44  | 12.36  | 12.40  | 12.29  | 12.23  | 12.28  |

|       |       |       |       |       |       |       |       |       |       |       |       |
|-------|-------|-------|-------|-------|-------|-------|-------|-------|-------|-------|-------|
| 2.57  | 12.98 | 13.09 | 13.02 | 13.03 | 13.16 | 13.15 | 13.15 | 13.17 | 13.14 | 13.18 | 13.15 |
| 2.62  | 13.08 | 13.08 | 13.01 | 12.95 | 12.97 | 13.03 | 12.94 | 12.86 | 12.92 | 12.96 | 13.03 |
| 2.67  | 12.81 | 12.87 | 12.78 | 12.76 | 12.69 | 12.77 | 12.65 | 12.65 | 12.59 | 12.50 | 12.57 |
| 2.72  | 13.14 | 13.20 | 13.11 | 13.12 | 13.18 | 13.15 | 13.13 | 13.15 | 13.13 | 13.13 | 13.15 |
| 2.77  | 13.10 | 13.07 | 13.07 | 12.96 | 12.90 | 12.90 | 12.90 | 12.89 | 12.85 | 12.87 | 12.92 |
| 2.82  | 13.29 | 13.32 | 13.23 | 13.13 | 13.14 | 13.07 | 13.06 | 12.95 | 12.87 | 12.88 | 12.86 |
| 2.87  | 13.09 | 13.13 | 13.08 | 13.04 | 13.07 | 13.03 | 13.00 | 13.02 | 13.00 | 13.03 | 13.06 |
| 2.92  | 13.73 | 13.69 | 13.64 | 13.60 | 13.51 | 13.43 | 13.41 | 13.32 | 13.29 | 13.24 | 13.12 |
| 2.97  | 13.52 | 13.56 | 13.50 | 13.48 | 13.40 | 13.37 | 13.33 | 13.29 | 13.31 | 13.23 | 13.33 |
| 3.02  | 13.98 | 13.92 | 13.94 | 13.83 | 13.83 | 13.70 | 13.75 | 13.72 | 13.62 | 13.62 | 13.63 |
| 3.07  | 13.55 | 13.54 | 13.47 | 13.33 | 13.34 | 13.28 | 13.20 | 13.05 | 13.11 | 13.01 | 12.92 |
| 3.12  | 13.77 | 13.78 | 13.73 | 13.64 | 13.61 | 13.58 | 13.52 | 13.46 | 13.43 | 13.36 | 13.33 |
| 3.17  | 13.79 | 13.77 | 13.74 | 13.62 | 13.63 | 13.50 | 13.56 | 13.38 | 13.34 | 13.36 | 13.33 |
| 3.22  | 14.57 | 14.58 | 14.47 | 14.37 | 14.24 | 14.27 | 14.18 | 14.06 | 13.98 | 13.93 | 13.86 |
| 3.42  | 14.71 | 14.71 | 14.51 | 14.47 | 14.40 | 14.31 | 14.25 | 14.16 | 14.12 | 14.04 | 14.14 |
| 3.62  | 15.29 | 15.27 | 15.15 | 15.03 | 14.94 | 14.90 | 14.79 | 14.69 | 14.62 | 14.48 | 14.33 |
| 3.82  | 15.10 | 14.99 | 14.90 | 14.86 | 14.67 | 14.60 | 14.52 | 14.40 | 14.40 | 14.31 | 14.26 |
| 4.02  | 15.58 | 15.53 | 15.43 | 15.37 | 15.24 | 15.23 | 15.05 | 14.94 | 14.81 | 14.71 | 14.72 |
| 4.22  | 15.33 | 15.22 | 15.11 | 14.97 | 14.94 | 14.84 | 14.75 | 14.59 | 14.48 | 14.44 | 14.39 |
| 4.42  | 15.75 | 15.69 | 15.43 | 15.36 | 15.33 | 15.20 | 15.06 | 14.97 | 14.82 | 14.63 | 14.61 |
| 4.62  | 15.91 | 15.89 | 15.79 | 15.64 | 15.59 | 15.44 | 15.37 | 15.23 | 15.17 | 15.02 | 14.97 |
| 4.82  | 15.96 | 15.87 | 15.82 | 15.71 | 15.52 | 15.47 | 15.31 | 15.14 | 15.05 | 14.99 | 14.84 |
| 5.02  | 16.27 | 16.23 | 16.11 | 15.87 | 15.83 | 15.74 | 15.62 | 15.46 | 15.36 | 15.29 | 15.15 |
| 5.22  | 16.42 | 16.43 | 16.27 | 16.20 | 16.06 | 15.95 | 15.83 | 15.73 | 15.61 | 15.39 | 15.29 |
| 5.42  | 16.59 | 16.55 | 16.36 | 16.27 | 16.19 | 16.02 | 15.83 | 15.78 | 15.60 | 15.50 | 15.41 |
| 5.62  | 16.79 | 16.63 | 16.54 | 16.34 | 16.24 | 16.16 | 16.05 | 15.95 | 15.78 | 15.61 | 15.53 |
| 5.82  | 16.73 | 16.66 | 16.49 | 16.34 | 16.25 | 16.15 | 16.06 | 15.86 | 15.78 | 15.68 | 15.47 |
| 6.02  | 16.85 | 16.80 | 16.67 | 16.50 | 16.43 | 16.39 | 16.05 | 15.97 | 15.88 | 15.67 | 15.60 |
| 6.22  | 16.89 | 16.75 | 16.51 | 16.42 | 16.27 | 16.17 | 16.00 | 15.86 | 15.76 | 15.61 | 15.51 |
| 6.42  | 16.97 | 16.95 | 16.74 | 16.67 | 16.54 | 16.30 | 16.15 | 16.04 | 15.81 | 15.81 | 15.64 |
| 6.62  | 17.43 | 17.35 | 17.20 | 17.04 | 16.98 | 16.80 | 16.65 | 16.56 | 16.39 | 16.24 | 16.10 |
| 6.82  | 17.21 | 17.10 | 16.92 | 16.82 | 16.61 | 16.48 | 16.37 | 16.27 | 16.01 | 15.95 | 15.79 |
| 7.02  | 17.65 | 17.59 | 17.35 | 17.28 | 17.09 | 16.99 | 16.85 | 16.71 | 16.57 | 16.42 | 16.28 |
| 7.22  | 17.44 | 17.33 | 17.17 | 16.96 | 16.89 | 16.70 | 16.63 | 16.44 | 16.28 | 16.12 | 16.01 |
| 7.42  | 17.73 | 17.68 | 17.55 | 17.35 | 17.21 | 17.06 | 16.90 | 16.73 | 16.63 | 16.48 | 16.29 |
| 7.62  | 17.64 | 17.52 | 17.34 | 17.25 | 17.03 | 16.92 | 16.80 | 16.60 | 16.46 | 16.32 | 16.18 |
| 7.82  | 17.70 | 17.58 | 17.37 | 17.30 | 17.17 | 17.00 | 16.79 | 16.76 | 16.48 | 16.26 | 16.14 |
| 8.02  | 17.54 | 17.50 | 17.25 | 17.17 | 16.95 | 16.85 | 16.62 | 16.52 | 16.29 | 16.19 | 15.99 |
| 8.22  | 17.67 | 17.53 | 17.45 | 17.23 | 17.12 | 17.00 | 16.83 | 16.67 | 16.52 | 16.36 | 16.23 |
| 8.42  | 17.38 | 17.32 | 17.12 | 16.90 | 16.75 | 16.66 | 16.48 | 16.37 | 16.17 | 15.96 | 15.86 |
| 8.62  | 17.76 | 17.70 | 17.47 | 17.35 | 17.18 | 17.11 | 16.91 | 16.83 | 16.63 | 16.38 | 16.24 |
| 8.82  | 18.04 | 17.90 | 17.77 | 17.49 | 17.43 | 17.27 | 17.13 | 16.89 | 16.77 | 16.65 | 16.43 |
| 9.02  | 17.66 | 17.61 | 17.34 | 17.16 | 17.09 | 16.87 | 16.76 | 16.55 | 16.37 | 16.19 | 16.07 |
| 9.22  | 17.79 | 17.73 | 17.57 | 17.37 | 17.23 | 17.06 | 16.93 | 16.72 | 16.58 | 16.39 | 16.27 |
| 9.42  | 17.97 | 17.95 | 17.78 | 17.65 | 17.42 | 17.33 | 17.14 | 16.99 | 16.83 | 16.62 | 16.47 |
| 9.62  | 17.82 | 17.85 | 17.59 | 17.37 | 17.27 | 17.16 | 16.96 | 16.73 | 16.55 | 16.41 | 16.19 |
| 9.82  | 18.05 | 17.97 | 17.77 | 17.67 | 17.49 | 17.29 | 17.17 | 16.98 | 16.79 | 16.64 | 16.50 |
| 10.02 | 17.91 | 17.84 | 17.59 | 17.47 | 17.32 | 17.16 | 17.01 | 16.81 | 16.55 | 16.44 | 16.32 |
| 10.22 | 18.18 | 18.04 | 17.92 | 17.68 | 17.61 | 17.40 | 17.28 | 17.08 | 16.86 | 16.73 | 16.53 |
| 10.42 | 18.15 | 18.08 | 17.95 | 17.77 | 17.61 | 17.46 | 17.32 | 17.09 | 16.95 | 16.77 | 16.58 |



|       |       |       |       |       |       |       |       |       |       |       |       |
|-------|-------|-------|-------|-------|-------|-------|-------|-------|-------|-------|-------|
| 10.62 | 18.21 | 18.13 | 17.91 | 17.74 | 17.66 | 17.38 | 17.24 | 17.09 | 16.93 | 16.77 | 16.60 |
| 10.82 | 18.13 | 17.90 | 17.80 | 17.49 | 17.45 | 17.18 | 17.12 | 16.89 | 16.70 | 16.52 | 16.39 |
| 11.02 | 18.09 | 18.04 | 17.85 | 17.65 | 17.55 | 17.38 | 17.18 | 16.97 | 16.80 | 16.63 | 16.46 |
| 11.22 | 17.97 | 17.83 | 17.63 | 17.45 | 17.28 | 17.15 | 17.00 | 16.80 | 16.58 | 16.44 | 16.23 |
| 11.42 | 17.74 | 17.60 | 17.46 | 17.24 | 17.13 | 16.93 | 16.84 | 16.49 | 16.30 | 16.17 | 16.02 |
| 11.62 | 18.04 | 18.05 | 17.90 | 17.68 | 17.58 | 17.38 | 17.20 | 16.96 | 16.87 | 16.65 | 16.53 |
| 11.82 | 18.04 | 17.96 | 17.81 | 17.60 | 17.44 | 17.34 | 17.15 | 16.94 | 16.73 | 16.56 | 16.40 |
| 12.02 | 18.19 | 18.04 | 17.86 | 17.66 | 17.57 | 17.36 | 17.22 | 17.01 | 16.85 | 16.63 | 16.49 |
| 12.22 | 18.41 | 18.30 | 18.09 | 17.90 | 17.79 | 17.54 | 17.40 | 17.22 | 17.01 | 16.82 | 16.71 |
| 12.42 | 17.98 | 17.83 | 17.59 | 17.46 | 17.25 | 17.14 | 16.97 | 16.73 | 16.62 | 16.40 | 16.26 |
| 12.62 | 18.09 | 18.00 | 17.85 | 17.67 | 17.53 | 17.31 | 17.09 | 16.99 | 16.74 | 16.54 | 16.44 |
| 12.82 | 18.11 | 17.98 | 17.90 | 17.67 | 17.59 | 17.44 | 17.17 | 16.99 | 16.76 | 16.60 | 16.47 |
| 13.02 | 18.47 | 18.32 | 18.08 | 17.99 | 17.85 | 17.63 | 17.41 | 17.29 | 17.00 | 16.79 | 16.61 |
| 13.22 | 18.24 | 18.14 | 18.01 | 17.78 | 17.69 | 17.44 | 17.34 | 17.17 | 16.98 | 16.76 | 16.57 |
| 13.42 | 18.24 | 18.17 | 17.95 | 17.76 | 17.57 | 17.49 | 17.30 | 17.06 | 16.92 | 16.70 | 16.56 |
| 13.50 | 18.12 | 18.07 | 17.89 | 17.74 | 17.48 | 17.38 | 17.21 | 16.92 | 16.80 | 16.53 | 16.37 |
| 13.59 | 18.48 | 18.37 | 18.15 | 17.99 | 17.86 | 17.69 | 17.45 | 17.25 | 17.07 | 16.83 | 16.69 |
| 13.68 | 18.30 | 18.09 | 18.00 | 17.81 | 17.65 | 17.46 | 17.33 | 17.11 | 16.93 | 16.71 | 16.59 |
| 13.78 | 17.96 | 17.82 | 17.61 | 17.44 | 17.27 | 17.19 | 16.98 | 16.80 | 16.56 | 16.39 | 16.20 |
| 13.88 | 18.22 | 18.14 | 17.97 | 17.72 | 17.55 | 17.41 | 17.33 | 17.03 | 16.85 | 16.72 | 16.45 |
| 14.00 | 18.49 | 18.45 | 18.20 | 17.99 | 17.89 | 17.67 | 17.53 | 17.32 | 17.10 | 16.89 | 16.80 |
| 14.12 | 18.44 | 18.27 | 18.07 | 17.98 | 17.78 | 17.44 | 17.32 | 17.11 | 16.97 | 16.77 | 16.56 |
| 14.25 | 18.25 | 18.16 | 17.93 | 17.65 | 17.60 | 17.46 | 17.18 | 17.08 | 16.84 | 16.66 | 16.49 |
| 14.40 | 18.76 | 18.56 | 18.44 | 18.19 | 18.11 | 17.99 | 17.66 | 17.53 | 17.30 | 17.12 | 16.97 |
| 14.55 | 18.20 | 18.11 | 17.89 | 17.67 | 17.51 | 17.38 | 17.20 | 17.02 | 16.81 | 16.60 | 16.39 |
| 14.72 | 18.35 | 18.22 | 18.05 | 17.88 | 17.65 | 17.47 | 17.37 | 17.11 | 16.94 | 16.77 | 16.51 |
| 14.90 | 18.24 | 18.05 | 17.88 | 17.74 | 17.57 | 17.41 | 17.21 | 16.98 | 16.82 | 16.61 | 16.41 |
| 15.09 | 18.20 | 18.02 | 17.92 | 17.66 | 17.46 | 17.22 | 17.09 | 16.88 | 16.70 | 16.50 | 16.32 |
| 15.30 | 18.42 | 18.30 | 18.15 | 17.97 | 17.80 | 17.64 | 17.47 | 17.25 | 17.03 | 16.83 | 16.66 |
| 15.53 | 18.72 | 18.68 | 18.44 | 18.26 | 18.13 | 17.96 | 17.72 | 17.52 | 17.35 | 17.10 | 16.88 |
| 15.77 | 18.48 | 18.34 | 18.18 | 18.01 | 17.86 | 17.65 | 17.48 | 17.23 | 17.10 | 16.91 | 16.66 |
| 16.04 | 18.70 | 18.54 | 18.38 | 18.16 | 18.04 | 17.80 | 17.61 | 17.36 | 17.22 | 17.01 | 16.88 |
| 16.32 | 18.56 | 18.45 | 18.30 | 18.09 | 17.89 | 17.75 | 17.64 | 17.41 | 17.11 | 16.86 | 16.76 |
| 16.63 | 18.80 | 18.69 | 18.49 | 18.30 | 18.17 | 17.96 | 17.81 | 17.60 | 17.40 | 17.11 | 16.96 |
| 16.96 | 18.99 | 18.91 | 18.67 | 18.38 | 18.31 | 18.09 | 17.97 | 17.73 | 17.51 | 17.38 | 17.14 |
| 17.31 | 18.67 | 18.58 | 18.34 | 18.14 | 17.95 | 17.78 | 17.60 | 17.41 | 17.18 | 17.01 | 16.77 |
| 17.70 | 19.15 | 19.07 | 18.86 | 18.66 | 18.48 | 18.37 | 18.17 | 17.91 | 17.78 | 17.54 | 17.33 |
| 18.11 | 18.39 | 18.31 | 18.07 | 17.83 | 17.63 | 17.49 | 17.27 | 17.15 | 16.90 | 16.71 | 16.53 |
| 18.56 | 18.66 | 18.60 | 18.42 | 18.16 | 18.12 | 17.87 | 17.71 | 17.49 | 17.29 | 17.03 | 16.79 |
| 19.04 | 18.72 | 18.64 | 18.41 | 18.21 | 18.00 | 17.85 | 17.70 | 17.45 | 17.17 | 17.03 | 16.94 |
| 19.56 | 19.08 | 19.03 | 18.81 | 18.64 | 18.49 | 18.25 | 18.08 | 17.82 | 17.63 | 17.42 | 17.18 |
| 20.12 | 19.02 | 18.93 | 18.64 | 18.46 | 18.33 | 18.13 | 17.95 | 17.81 | 17.52 | 17.34 | 17.12 |
| 20.72 | 19.16 | 19.04 | 18.91 | 18.68 | 18.51 | 18.35 | 18.15 | 17.88 | 17.74 | 17.51 | 17.33 |
| 21.37 | 19.18 | 19.06 | 18.81 | 18.68 | 18.62 | 18.29 | 18.14 | 17.95 | 17.71 | 17.45 | 17.29 |
| 22.08 | 19.20 | 19.01 | 18.80 | 18.70 | 18.49 | 18.32 | 18.18 | 17.87 | 17.67 | 17.54 | 17.30 |
| 22.84 | 19.46 | 19.36 | 19.08 | 18.88 | 18.88 | 18.61 | 18.36 | 18.24 | 18.06 | 17.76 | 17.61 |
| 23.65 | 18.83 | 18.80 | 18.62 | 18.34 | 18.24 | 18.11 | 17.92 | 17.59 | 17.41 | 17.29 | 17.04 |
| 24.54 | 19.48 | 19.31 | 19.07 | 18.88 | 18.72 | 18.60 | 18.35 | 18.06 | 17.97 | 17.63 | 17.49 |
| 25.49 | 19.71 | 19.51 | 19.30 | 19.17 | 18.99 | 18.80 | 18.54 | 18.35 | 18.17 | 17.89 | 17.69 |
| 26.51 | 19.00 | 19.01 | 18.76 | 18.61 | 18.36 | 18.20 | 18.00 | 17.72 | 17.61 | 17.47 | 17.17 |

|        |       |       |       |       |       |       |       |       |       |       |       |
|--------|-------|-------|-------|-------|-------|-------|-------|-------|-------|-------|-------|
| 27.62  | 19.82 | 19.75 | 19.55 | 19.28 | 19.13 | 18.96 | 18.70 | 18.49 | 18.20 | 18.04 | 17.83 |
| 28.81  | 19.81 | 19.67 | 19.46 | 19.35 | 19.17 | 19.04 | 18.78 | 18.53 | 18.31 | 18.02 | 17.80 |
| 30.10  | 19.40 | 19.27 | 19.02 | 18.87 | 18.70 | 18.45 | 18.33 | 18.11 | 17.85 | 17.68 | 17.46 |
| 31.49  | 20.04 | 19.97 | 19.77 | 19.54 | 19.43 | 19.20 | 19.00 | 18.70 | 18.58 | 18.33 | 18.06 |
| 32.98  | 19.85 | 19.77 | 19.52 | 19.33 | 19.11 | 18.97 | 18.72 | 18.63 | 18.30 | 18.14 | 17.89 |
| 34.60  | 20.31 | 20.21 | 19.95 | 19.76 | 19.60 | 19.47 | 19.23 | 18.98 | 18.81 | 18.62 | 18.25 |
| 36.34  | 20.07 | 20.04 | 19.77 | 19.59 | 19.42 | 19.24 | 19.04 | 18.75 | 18.54 | 18.39 | 18.20 |
| 38.21  | 20.82 | 20.59 | 20.48 | 20.31 | 20.11 | 19.91 | 19.74 | 19.48 | 19.21 | 18.95 | 18.88 |
| 40.24  | 20.51 | 20.35 | 20.17 | 20.03 | 19.85 | 19.66 | 19.38 | 19.12 | 18.91 | 18.68 | 18.50 |
| 42.42  | 20.24 | 20.12 | 19.94 | 19.75 | 19.60 | 19.39 | 19.19 | 18.86 | 18.71 | 18.48 | 18.27 |
| 44.78  | 20.48 | 20.31 | 20.10 | 19.99 | 19.70 | 19.50 | 19.32 | 19.14 | 18.97 | 18.67 | 18.53 |
| 47.32  | 20.42 | 20.30 | 20.05 | 19.86 | 19.73 | 19.54 | 19.33 | 19.13 | 18.82 | 18.66 | 18.43 |
| 50.06  | 20.79 | 20.67 | 20.54 | 20.27 | 20.15 | 19.95 | 19.71 | 19.54 | 19.27 | 19.00 | 18.81 |
| 53.01  | 20.89 | 20.79 | 20.58 | 20.48 | 20.23 | 20.03 | 19.84 | 19.61 | 19.34 | 19.15 | 18.98 |
| 56.20  | 21.21 | 21.02 | 20.87 | 20.60 | 20.48 | 20.31 | 20.15 | 19.83 | 19.61 | 19.43 | 19.15 |
| 59.64  | 21.56 | 21.56 | 21.37 | 21.15 | 21.00 | 20.82 | 20.53 | 20.39 | 20.14 | 19.89 | 19.62 |
| 63.34  | 20.92 | 20.85 | 20.77 | 20.49 | 20.34 | 20.14 | 19.96 | 19.71 | 19.54 | 19.19 | 19.07 |
| 67.34  | 21.42 | 21.34 | 21.16 | 20.95 | 20.82 | 20.64 | 20.42 | 20.24 | 19.95 | 19.70 | 19.50 |
| 71.65  | 22.00 | 21.80 | 21.70 | 21.52 | 21.31 | 21.15 | 20.99 | 20.70 | 20.47 | 20.21 | 20.05 |
| 76.30  | 21.95 | 21.84 | 21.68 | 21.57 | 21.33 | 21.18 | 20.97 | 20.71 | 20.43 | 20.23 | 19.96 |
| 81.32  | 22.48 | 22.44 | 22.24 | 22.07 | 21.86 | 21.65 | 21.51 | 21.19 | 21.07 | 20.84 | 20.57 |
| 86.73  | 22.75 | 22.63 | 22.44 | 22.35 | 22.15 | 21.94 | 21.80 | 21.55 | 21.31 | 21.04 | 20.82 |
| 92.56  | 22.90 | 22.91 | 22.78 | 22.59 | 22.38 | 22.23 | 22.03 | 21.83 | 21.53 | 21.22 | 21.06 |
| 98.85  | 22.71 | 22.60 | 22.41 | 22.31 | 22.12 | 21.92 | 21.69 | 21.51 | 21.23 | 21.03 | 20.80 |
| 105.64 | 23.37 | 23.29 | 23.19 | 23.05 | 22.96 | 22.76 | 22.48 | 22.28 | 22.04 | 21.71 | 21.55 |
| 112.96 | 23.76 | 23.67 | 23.49 | 23.32 | 23.18 | 23.01 | 22.79 | 22.55 | 22.27 | 22.05 | 21.81 |
| 120.85 | 23.85 | 23.80 | 23.58 | 23.42 | 23.29 | 22.98 | 22.84 | 22.62 | 22.35 | 22.16 | 21.87 |
| 129.36 | 24.28 | 24.26 | 24.13 | 24.05 | 23.81 | 23.65 | 23.42 | 23.11 | 22.81 | 22.62 | 22.45 |
| 138.55 | 24.52 | 24.51 | 24.28 | 24.10 | 23.97 | 23.75 | 23.55 | 23.45 | 23.04 | 22.89 | 22.58 |
| 148.45 | 24.46 | 24.40 | 24.24 | 24.05 | 23.84 | 23.70 | 23.45 | 23.24 | 22.98 | 22.82 | 22.52 |
| 159.13 | 24.81 | 24.81 | 24.63 | 24.44 | 24.30 | 24.11 | 23.90 | 23.69 | 23.50 | 23.21 | 22.93 |
| 170.65 | 25.21 | 25.09 | 24.98 | 24.85 | 24.62 | 24.57 | 24.31 | 24.09 | 23.81 | 23.58 | 23.24 |
| 183.07 | 25.67 | 25.75 | 25.54 | 25.43 | 25.26 | 25.03 | 24.85 | 24.58 | 24.33 | 24.08 | 23.85 |
| 196.47 | 25.79 | 25.77 | 25.65 | 25.46 | 25.36 | 25.18 | 24.94 | 24.67 | 24.46 | 24.22 | 23.93 |
| 210.91 | 26.30 | 26.22 | 26.20 | 25.99 | 25.85 | 25.64 | 25.51 | 25.18 | 24.93 | 24.68 | 24.37 |
| 226.50 | 26.57 | 26.52 | 26.39 | 26.21 | 26.08 | 25.93 | 25.70 | 25.46 | 25.16 | 24.89 | 24.70 |
| 243.31 | 26.79 | 26.75 | 26.55 | 26.49 | 26.26 | 26.13 | 25.89 | 25.60 | 25.39 | 25.08 | 24.91 |
| 261.43 | 27.50 | 27.50 | 27.31 | 27.18 | 27.07 | 26.85 | 26.59 | 26.37 | 26.20 | 25.78 | 25.55 |
| 280.98 | 27.54 | 27.53 | 27.42 | 27.30 | 27.07 | 26.97 | 26.69 | 26.37 | 26.17 | 25.91 | 25.64 |
| 302.07 | 27.84 | 27.74 | 27.60 | 27.56 | 27.37 | 27.13 | 26.95 | 26.72 | 26.36 | 26.11 | 25.83 |
| 324.81 | 28.28 | 28.27 | 28.18 | 28.03 | 27.89 | 27.68 | 27.46 | 27.24 | 26.98 | 26.65 | 26.42 |
| 349.33 | 28.57 | 28.54 | 28.35 | 28.24 | 28.06 | 27.88 | 27.69 | 27.40 | 27.13 | 26.83 | 26.60 |
| 375.79 | 28.98 | 28.93 | 28.78 | 28.71 | 28.48 | 28.33 | 28.13 | 27.83 | 27.56 | 27.32 | 27.00 |
| 404.31 | 28.93 | 28.89 | 28.79 | 28.58 | 28.45 | 28.34 | 28.06 | 27.89 | 27.66 | 27.27 | 27.02 |
| 435.08 | 29.57 | 29.51 | 29.37 | 29.25 | 29.12 | 28.96 | 28.73 | 28.49 | 28.12 | 27.89 | 27.58 |
| 468.27 | 29.73 | 29.71 | 29.55 | 29.34 | 29.29 | 29.02 | 28.84 | 28.60 | 28.24 | 27.97 | 27.72 |
| 504.06 | 30.18 | 30.20 | 30.02 | 29.88 | 29.73 | 29.52 | 29.30 | 29.00 | 28.78 | 28.47 | 28.15 |
| 542.66 | 30.25 | 30.19 | 30.08 | 30.00 | 29.79 | 29.63 | 29.41 | 29.11 | 28.86 | 28.57 | 28.28 |
| 584.29 | 30.58 | 30.46 | 30.41 | 30.28 | 30.10 | 29.88 | 29.72 | 29.44 | 29.17 | 28.82 | 28.57 |
| 629.18 | 30.80 | 30.80 | 30.63 | 30.48 | 30.32 | 30.14 | 29.89 | 29.67 | 29.33 | 29.10 | 28.77 |

|         |       |       |       |       |       |       |       |       |       |       |       |
|---------|-------|-------|-------|-------|-------|-------|-------|-------|-------|-------|-------|
| 677.61  | 31.24 | 31.27 | 31.14 | 31.00 | 30.92 | 30.66 | 30.43 | 30.17 | 29.89 | 29.63 | 29.32 |
| 729.83  | 31.27 | 31.16 | 31.10 | 30.99 | 30.81 | 30.60 | 30.39 | 30.12 | 29.77 | 29.52 | 29.23 |
| 786.16  | 31.67 | 31.54 | 31.46 | 31.31 | 31.13 | 30.88 | 30.77 | 30.45 | 30.20 | 29.89 | 29.61 |
| 846.90  | 31.59 | 31.58 | 31.48 | 31.27 | 31.12 | 30.98 | 30.75 | 30.51 | 30.13 | 29.85 | 29.53 |
| 912.42  | 31.87 | 31.84 | 31.73 | 31.50 | 31.37 | 31.15 | 30.93 | 30.68 | 30.43 | 30.06 | 29.77 |
| 983.08  | 32.02 | 31.90 | 31.82 | 31.70 | 31.51 | 31.29 | 31.12 | 30.80 | 30.53 | 30.21 | 29.90 |
| 1059.29 | 32.18 | 32.18 | 32.01 | 31.87 | 31.75 | 31.54 | 31.27 | 30.96 | 30.63 | 30.45 | 30.12 |
| 1141.48 | 32.03 | 32.03 | 31.87 | 31.80 | 31.62 | 31.37 | 31.20 | 30.91 | 30.55 | 30.32 | 29.96 |
| 1230.13 | 32.01 | 31.93 | 31.85 | 31.71 | 31.56 | 31.29 | 31.09 | 30.84 | 30.43 | 30.17 | 29.83 |
| 1325.73 | 32.16 | 32.13 | 32.05 | 31.91 | 31.70 | 31.51 | 31.29 | 31.06 | 30.71 | 30.40 | 30.14 |
| 1428.84 | 32.14 | 32.05 | 31.94 | 31.85 | 31.57 | 31.43 | 31.23 | 30.86 | 30.60 | 30.26 | 29.99 |
| 1540.05 | 32.34 | 32.29 | 32.15 | 31.98 | 31.83 | 31.70 | 31.29 | 31.15 | 30.77 | 30.54 | 30.21 |
| 1659.99 | 32.26 | 32.20 | 32.12 | 31.95 | 31.75 | 31.60 | 31.37 | 31.07 | 30.78 | 30.41 | 30.14 |
| 1789.34 | 32.06 | 32.03 | 31.96 | 31.82 | 31.67 | 31.39 | 31.15 | 30.94 | 30.60 | 30.20 | 29.98 |
| 1928.85 | 32.24 | 32.15 | 32.05 | 31.90 | 31.72 | 31.55 | 31.25 | 31.10 | 30.65 | 30.35 | 30.00 |
| 2079.31 | 32.17 | 32.09 | 31.94 | 31.82 | 31.70 | 31.45 | 31.22 | 30.95 | 30.55 | 30.29 | 29.97 |
| 2241.59 | 32.01 | 32.03 | 31.79 | 31.74 | 31.58 | 31.35 | 31.02 | 30.75 | 30.44 | 30.09 | 29.92 |
| 2416.60 | 31.96 | 31.88 | 31.82 | 31.63 | 31.47 | 31.16 | 30.97 | 30.72 | 30.42 | 30.15 | 29.70 |
| 2605.36 | 31.86 | 31.81 | 31.75 | 31.60 | 31.38 | 31.18 | 30.86 | 30.62 | 30.29 | 30.04 | 29.70 |
| 2808.94 | 31.69 | 31.61 | 31.50 | 31.30 | 31.12 | 30.88 | 30.69 | 30.40 | 30.05 | 29.73 | 29.45 |
| 3028.50 | 31.50 | 31.46 | 31.30 | 31.10 | 30.94 | 30.81 | 30.44 | 30.20 | 29.84 | 29.63 | 29.26 |
| 3265.30 | 31.46 | 31.36 | 31.26 | 31.06 | 30.97 | 30.70 | 30.48 | 30.13 | 29.74 | 29.51 | 29.16 |
| 3520.69 | 31.13 | 31.05 | 30.98 | 30.76 | 30.61 | 30.34 | 30.05 | 29.72 | 29.43 | 29.20 | 28.86 |
| 3796.13 | 30.82 | 30.88 | 30.73 | 30.57 | 30.38 | 30.16 | 29.91 | 29.58 | 29.23 | 28.98 | 28.62 |

| Wavelength<br>(nm) | 600.39 | 601.81 | 603.24 | 604.66 | 606.08 | 607.51 | 608.93 | 610.36 | 611.78 | 613.20 | 614.63 |
|--------------------|--------|--------|--------|--------|--------|--------|--------|--------|--------|--------|--------|
| -3.78              | 0.01   | 0.01   | 0.02   | -0.06  | 0.03   | -0.05  | -0.06  | -0.04  | -0.05  | 0.03   | -0.02  |
| -3.28              | 0.00   | -0.01  | -0.01  | 0.03   | -0.03  | -0.05  | -0.06  | -0.03  | 0.00   | -0.05  | -0.06  |
| -2.78              | 0.04   | -0.02  | 0.02   | -0.04  | 0.00   | 0.04   | -0.02  | -0.02  | 0.01   | -0.03  | 0.03   |
| -2.28              | -0.01  | 0.03   | -0.02  | -0.04  | 0.03   | 0.02   | 0.02   | 0.06   | 0.03   | -0.03  | -0.03  |
| -1.78              | -0.01  | 0.03   | -0.02  | 0.03   | 0.01   | 0.04   | 0.07   | -0.02  | -0.04  | -0.03  | -0.04  |
| -1.28              | -0.02  | -0.06  | 0.03   | 0.04   | -0.02  | -0.01  | 0.00   | 0.02   | 0.06   | 0.03   | 0.09   |
| -0.78              | -0.01  | 0.04   | 0.04   | 0.03   | 0.00   | 0.05   | -0.01  | 0.04   | 0.01   | 0.05   | 0.04   |
| -0.28              | 0.01   | -0.01  | -0.06  | 0.00   | -0.01  | -0.04  | 0.05   | -0.02  | -0.02  | 0.03   | -0.01  |
| -0.18              | 0.01   | 0.04   | -0.04  | 0.04   | -0.03  | -0.01  | -0.06  | 0.06   | 0.02   | 0.06   | 0.07   |
| -0.08              | -0.09  | -0.01  | -0.03  | -0.06  | -0.03  | 0.01   | 0.03   | 0.01   | -0.04  | 0.06   | 0.01   |
| 0.02               | 0.06   | 0.07   | 0.08   | 0.03   | -0.01  | 0.10   | 0.04   | 0.13   | 0.10   | 0.10   | -0.01  |
| 0.12               | -0.01  | 0.01   | 0.05   | 0.01   | -0.01  | 0.06   | 0.02   | 0.09   | 0.00   | 0.05   | 0.03   |
| 0.22               | -0.04  | 0.09   | -0.01  | 0.02   | 0.01   | 0.06   | 0.01   | 0.07   | 0.07   | 0.03   | -0.01  |
| 0.27               | 0.00   | 0.08   | 0.06   | 0.01   | 0.04   | -0.04  | 0.01   | 0.11   | -0.06  | -0.01  | 0.02   |
| 0.32               | -0.02  | 0.01   | 0.07   | 0.04   | 0.07   | 0.04   | 0.04   | -0.01  | 0.00   | -0.02  | 0.00   |
| 0.37               | -0.05  | 0.07   | 0.02   | -0.04  | 0.01   | 0.00   | -0.04  | 0.02   | 0.01   | -0.02  | -0.01  |
| 0.42               | 0.02   | 0.06   | -0.06  | 0.00   | -0.06  | -0.06  | -0.05  | -0.01  | -0.10  | -0.08  | -0.06  |
| 0.47               | -0.11  | 0.06   | 0.00   | 0.03   | 0.00   | 0.01   | 0.00   | 0.04   | 0.08   | 0.05   | -0.07  |
| 0.52               | -0.09  | 0.01   | -0.01  | -0.04  | 0.04   | 0.01   | 0.02   | 0.02   | 0.01   | 0.00   | -0.02  |
| 0.57               | -0.01  | 0.00   | 0.01   | -0.02  | 0.09   | 0.07   | -0.06  | 0.03   | -0.06  | -0.02  | -0.01  |
| 0.62               | -0.06  | 0.03   | 0.03   | -0.01  | 0.01   | 0.00   | -0.01  | 0.07   | 0.03   | -0.04  | -0.04  |

|      |       |       |       |       |        |        |        |        |        |        |        |
|------|-------|-------|-------|-------|--------|--------|--------|--------|--------|--------|--------|
| 0.67 | -0.06 | -0.03 | 0.00  | -0.07 | -0.03  | 0.04   | -0.04  | -0.03  | -0.06  | -0.08  | -0.02  |
| 0.72 | -0.02 | 0.00  | 0.04  | -0.04 | -0.07  | -0.08  | -0.06  | -0.04  | -0.03  | -0.04  | 0.01   |
| 0.77 | -0.06 | -0.03 | -0.07 | -0.02 | 0.03   | 0.02   | -0.01  | -0.03  | 0.03   | 0.02   | 0.05   |
| 0.82 | -0.05 | -0.02 | -0.04 | 0.06  | 0.01   | -0.03  | -0.02  | 0.07   | 0.06   | -0.03  | 0.03   |
| 0.87 | 0.00  | 0.08  | 0.01  | 0.01  | 0.02   | 0.02   | -0.03  | 0.05   | 0.00   | -0.01  | 0.01   |
| 0.92 | -0.06 | 0.05  | 0.03  | -0.04 | 0.04   | 0.03   | -0.08  | 0.03   | 0.00   | 0.07   | 0.07   |
| 0.97 | -0.02 | -0.01 | 0.03  | -0.02 | 0.01   | 0.10   | 0.00   | 0.03   | 0.00   | 0.02   | -0.01  |
| 1.02 | -0.01 | 0.09  | 0.02  | 0.06  | 0.01   | -0.01  | 0.08   | 0.02   | 0.05   | 0.05   | 0.04   |
| 1.07 | -0.05 | 0.04  | 0.06  | 0.00  | 0.02   | -0.01  | -0.02  | -0.05  | 0.03   | 0.05   | 0.01   |
| 1.12 | -0.03 | 0.08  | 0.01  | 0.02  | 0.04   | -0.02  | 0.03   | 0.11   | 0.04   | 0.01   | 0.06   |
| 1.17 | 0.07  | 0.07  | -0.04 | -0.08 | -0.01  | 0.02   | -0.05  | 0.06   | 0.08   | -0.02  | -0.01  |
| 1.22 | -0.07 | 0.05  | 0.10  | -0.01 | -0.08  | -0.04  | 0.09   | 0.15   | 0.01   | -0.10  | -0.08  |
| 1.27 | -0.10 | -0.16 | -0.28 | -0.24 | -0.14  | -0.05  | 0.03   | -0.01  | 0.01   | -0.10  | 0.00   |
| 1.32 | -9.55 | -5.75 | -2.43 | 0.45  | 2.65   | 4.12   | 4.77   | 4.78   | 4.04   | 2.86   | 1.50   |
| 1.37 | 7.16  | 1.98  | -3.96 | -7.55 | -10.61 | -12.33 | -13.73 | -13.71 | -14.10 | -14.01 | -14.83 |
| 1.42 | 7.06  | 13.19 | 18.84 | 25.73 | 32.47  | 40.18  | 47.81  | 56.37  | 64.34  | 72.68  | 79.63  |
| 1.47 | 12.53 | 12.33 | 12.13 | 12.11 | 12.31  | 12.58  | 13.00  | 13.52  | 13.84  | 14.20  | 14.41  |
| 1.52 | 13.57 | 14.06 | 14.29 | 14.69 | 15.07  | 15.35  | 15.66  | 16.02  | 16.20  | 16.51  | 16.77  |
| 1.57 | 11.41 | 11.90 | 12.12 | 12.60 | 13.05  | 13.57  | 14.06  | 14.55  | 14.98  | 15.45  | 15.66  |
| 1.62 | 11.85 | 11.90 | 11.78 | 11.78 | 11.71  | 11.90  | 12.05  | 12.17  | 12.36  | 12.73  | 13.11  |
| 1.67 | 11.61 | 11.85 | 12.07 | 12.36 | 12.50  | 12.67  | 12.78  | 12.92  | 12.98  | 13.07  | 13.13  |
| 1.72 | 10.44 | 10.67 | 10.81 | 11.07 | 11.34  | 11.70  | 12.05  | 12.45  | 12.80  | 13.16  | 13.53  |
| 1.77 | 11.60 | 11.81 | 11.82 | 11.95 | 12.00  | 12.10  | 12.16  | 12.30  | 12.34  | 12.46  | 12.53  |
| 1.82 | 11.18 | 11.46 | 11.74 | 12.01 | 12.22  | 12.46  | 12.67  | 12.93  | 12.99  | 13.11  | 13.28  |
| 1.87 | 11.52 | 11.63 | 11.65 | 11.80 | 11.96  | 12.16  | 12.47  | 12.83  | 13.08  | 13.31  | 13.60  |
| 1.92 | 12.35 | 12.48 | 12.64 | 12.72 | 12.77  | 12.89  | 12.90  | 12.90  | 12.95  | 12.92  | 12.94  |
| 1.97 | 11.26 | 11.50 | 11.66 | 11.90 | 12.29  | 12.55  | 12.81  | 13.18  | 13.39  | 13.53  | 13.84  |
| 2.02 | 12.06 | 12.11 | 12.07 | 12.18 | 12.25  | 12.24  | 12.33  | 12.58  | 12.65  | 12.76  | 13.02  |
| 2.07 | 12.45 | 12.63 | 12.68 | 12.82 | 12.88  | 12.97  | 12.99  | 13.05  | 13.10  | 13.10  | 13.15  |
| 2.12 | 11.34 | 11.41 | 11.49 | 11.61 | 11.74  | 12.05  | 12.28  | 12.53  | 12.71  | 12.92  | 13.11  |
| 2.17 | 11.63 | 11.72 | 11.75 | 11.72 | 11.76  | 11.77  | 11.85  | 12.03  | 12.07  | 12.21  | 12.40  |
| 2.22 | 12.20 | 12.50 | 12.62 | 12.71 | 12.93  | 13.04  | 13.24  | 13.38  | 13.51  | 13.58  | 13.66  |
| 2.27 | 12.28 | 12.43 | 12.44 | 12.56 | 12.65  | 12.79  | 12.92  | 13.21  | 13.36  | 13.67  | 13.89  |
| 2.32 | 12.29 | 12.40 | 12.40 | 12.48 | 12.50  | 12.61  | 12.65  | 12.75  | 12.74  | 12.82  | 12.88  |
| 2.37 | 12.20 | 12.28 | 12.33 | 12.55 | 12.65  | 12.94  | 13.08  | 13.31  | 13.40  | 13.53  | 13.70  |
| 2.42 | 12.22 | 12.25 | 12.30 | 12.22 | 12.39  | 12.50  | 12.59  | 12.80  | 12.92  | 13.18  | 13.27  |
| 2.47 | 12.96 | 13.18 | 13.19 | 13.24 | 13.33  | 13.37  | 13.48  | 13.60  | 13.63  | 13.63  | 13.68  |
| 2.52 | 12.30 | 12.31 | 12.41 | 12.57 | 12.64  | 12.81  | 12.97  | 13.24  | 13.42  | 13.48  | 13.64  |
| 2.57 | 13.05 | 13.14 | 13.12 | 13.13 | 13.18  | 13.30  | 13.21  | 13.44  | 13.49  | 13.64  | 13.71  |
| 2.62 | 13.11 | 13.20 | 13.25 | 13.41 | 13.46  | 13.51  | 13.66  | 13.84  | 13.80  | 13.86  | 13.91  |
| 2.67 | 12.50 | 12.63 | 12.62 | 12.71 | 12.82  | 13.01  | 13.15  | 13.30  | 13.47  | 13.61  | 13.74  |
| 2.72 | 13.14 | 13.22 | 13.22 | 13.22 | 13.21  | 13.23  | 13.28  | 13.36  | 13.42  | 13.44  | 13.54  |
| 2.77 | 12.83 | 13.03 | 13.05 | 13.21 | 13.30  | 13.42  | 13.51  | 13.71  | 13.83  | 13.90  | 14.01  |
| 2.82 | 12.69 | 12.71 | 12.63 | 12.71 | 12.74  | 12.76  | 12.94  | 13.12  | 13.17  | 13.34  | 13.47  |
| 2.87 | 13.02 | 13.03 | 13.07 | 13.14 | 13.25  | 13.34  | 13.36  | 13.52  | 13.54  | 13.59  | 13.70  |
| 2.92 | 13.09 | 13.11 | 13.16 | 13.26 | 13.31  | 13.52  | 13.59  | 13.82  | 13.91  | 14.04  | 14.16  |
| 2.97 | 13.22 | 13.22 | 13.23 | 13.15 | 13.27  | 13.29  | 13.31  | 13.48  | 13.55  | 13.54  | 13.72  |
| 3.02 | 13.65 | 13.74 | 13.69 | 13.82 | 13.86  | 13.92  | 13.97  | 14.05  | 14.08  | 14.12  | 14.21  |
| 3.07 | 12.86 | 12.98 | 12.93 | 12.98 | 13.14  | 13.19  | 13.30  | 13.51  | 13.59  | 13.69  | 13.77  |
| 3.12 | 13.13 | 13.22 | 13.23 | 13.18 | 13.27  | 13.25  | 13.29  | 13.37  | 13.36  | 13.47  | 13.53  |

|       |       |       |       |       |       |       |       |       |       |       |       |
|-------|-------|-------|-------|-------|-------|-------|-------|-------|-------|-------|-------|
| 3.17  | 13.38 | 13.37 | 13.41 | 13.44 | 13.52 | 13.64 | 13.71 | 13.85 | 13.95 | 13.97 | 14.06 |
| 3.22  | 13.74 | 13.77 | 13.65 | 13.67 | 13.68 | 13.72 | 13.84 | 13.90 | 13.94 | 14.13 | 14.16 |
| 3.42  | 14.00 | 14.08 | 14.03 | 14.11 | 14.17 | 14.20 | 14.20 | 14.35 | 14.41 | 14.43 | 14.42 |
| 3.62  | 14.33 | 14.40 | 14.31 | 14.28 | 14.41 | 14.45 | 14.53 | 14.65 | 14.72 | 14.78 | 14.90 |
| 3.82  | 14.14 | 14.26 | 14.15 | 14.13 | 14.13 | 14.24 | 14.22 | 14.36 | 14.40 | 14.43 | 14.47 |
| 4.02  | 14.61 | 14.61 | 14.55 | 14.57 | 14.56 | 14.62 | 14.68 | 14.82 | 14.88 | 14.92 | 15.00 |
| 4.22  | 14.35 | 14.34 | 14.27 | 14.28 | 14.29 | 14.30 | 14.31 | 14.44 | 14.36 | 14.55 | 14.46 |
| 4.42  | 14.52 | 14.49 | 14.43 | 14.39 | 14.45 | 14.45 | 14.53 | 14.58 | 14.60 | 14.62 | 14.70 |
| 4.62  | 14.89 | 14.85 | 14.73 | 14.78 | 14.82 | 14.76 | 14.81 | 14.89 | 14.89 | 14.93 | 15.02 |
| 4.82  | 14.70 | 14.75 | 14.66 | 14.69 | 14.67 | 14.59 | 14.68 | 14.71 | 14.73 | 14.80 | 14.91 |
| 5.02  | 14.98 | 15.01 | 14.87 | 14.88 | 14.81 | 14.82 | 14.80 | 14.92 | 14.94 | 15.03 | 15.06 |
| 5.22  | 15.23 | 15.20 | 15.10 | 15.06 | 15.05 | 15.10 | 15.06 | 15.12 | 15.19 | 15.16 | 15.16 |
| 5.42  | 15.36 | 15.30 | 15.16 | 15.11 | 15.14 | 15.09 | 15.07 | 15.19 | 15.18 | 15.21 | 15.22 |
| 5.62  | 15.33 | 15.35 | 15.21 | 15.21 | 15.22 | 15.23 | 15.13 | 15.28 | 15.29 | 15.26 | 15.31 |
| 5.82  | 15.35 | 15.37 | 15.24 | 15.22 | 15.25 | 15.17 | 15.14 | 15.24 | 15.22 | 15.24 | 15.29 |
| 6.02  | 15.49 | 15.37 | 15.28 | 15.31 | 15.16 | 15.23 | 15.22 | 15.24 | 15.28 | 15.29 | 15.32 |
| 6.22  | 15.32 | 15.32 | 15.20 | 15.08 | 15.12 | 15.09 | 15.01 | 15.09 | 15.10 | 15.12 | 15.14 |
| 6.42  | 15.47 | 15.52 | 15.40 | 15.34 | 15.31 | 15.29 | 15.24 | 15.29 | 15.31 | 15.36 | 15.40 |
| 6.62  | 16.05 | 15.90 | 15.84 | 15.72 | 15.75 | 15.69 | 15.65 | 15.73 | 15.73 | 15.66 | 15.73 |
| 6.82  | 15.69 | 15.58 | 15.39 | 15.39 | 15.35 | 15.36 | 15.33 | 15.47 | 15.44 | 15.39 | 15.40 |
| 7.02  | 16.16 | 16.09 | 15.99 | 15.91 | 15.80 | 15.81 | 15.85 | 15.89 | 15.80 | 15.81 | 15.89 |
| 7.22  | 15.84 | 15.71 | 15.71 | 15.56 | 15.54 | 15.54 | 15.42 | 15.53 | 15.51 | 15.51 | 15.43 |
| 7.42  | 16.18 | 16.12 | 15.94 | 15.91 | 15.81 | 15.84 | 15.80 | 15.98 | 15.81 | 15.84 | 15.86 |
| 7.62  | 16.07 | 15.97 | 15.78 | 15.72 | 15.69 | 15.67 | 15.64 | 15.67 | 15.71 | 15.69 | 15.72 |
| 7.82  | 15.97 | 16.04 | 15.83 | 15.74 | 15.72 | 15.74 | 15.72 | 15.68 | 15.64 | 15.71 | 15.68 |
| 8.02  | 15.84 | 15.82 | 15.62 | 15.57 | 15.50 | 15.41 | 15.44 | 15.53 | 15.44 | 15.45 | 15.44 |
| 8.22  | 16.05 | 15.98 | 15.85 | 15.74 | 15.65 | 15.68 | 15.67 | 15.68 | 15.68 | 15.59 | 15.67 |
| 8.42  | 15.66 | 15.59 | 15.47 | 15.39 | 15.26 | 15.24 | 15.20 | 15.30 | 15.26 | 15.25 | 15.24 |
| 8.62  | 16.12 | 16.01 | 15.88 | 15.80 | 15.74 | 15.83 | 15.74 | 15.70 | 15.69 | 15.72 | 15.72 |
| 8.82  | 16.20 | 16.18 | 16.08 | 15.94 | 15.93 | 15.96 | 15.84 | 15.91 | 15.78 | 15.81 | 15.78 |
| 9.02  | 15.95 | 15.89 | 15.64 | 15.60 | 15.53 | 15.48 | 15.50 | 15.53 | 15.45 | 15.49 | 15.39 |
| 9.22  | 16.03 | 16.01 | 15.80 | 15.72 | 15.70 | 15.66 | 15.62 | 15.59 | 15.59 | 15.52 | 15.65 |
| 9.42  | 16.27 | 16.22 | 16.06 | 16.01 | 15.94 | 15.88 | 15.83 | 15.89 | 15.87 | 15.84 | 15.89 |
| 9.62  | 16.08 | 16.05 | 15.85 | 15.77 | 15.73 | 15.55 | 15.58 | 15.55 | 15.49 | 15.49 | 15.52 |
| 9.82  | 16.33 | 16.26 | 16.07 | 15.98 | 15.94 | 15.86 | 15.80 | 15.84 | 15.74 | 15.78 | 15.78 |
| 10.02 | 16.10 | 16.09 | 15.91 | 15.85 | 15.70 | 15.67 | 15.64 | 15.70 | 15.66 | 15.73 | 15.65 |
| 10.22 | 16.27 | 16.34 | 16.10 | 16.08 | 15.97 | 15.94 | 15.86 | 15.92 | 15.93 | 15.86 | 15.82 |
| 10.42 | 16.41 | 16.35 | 16.15 | 16.10 | 16.01 | 15.97 | 15.88 | 15.82 | 15.89 | 15.85 | 15.79 |
| 10.62 | 16.33 | 16.28 | 16.10 | 16.04 | 15.90 | 15.90 | 15.81 | 15.87 | 15.82 | 15.77 | 15.77 |
| 10.82 | 16.15 | 16.14 | 15.93 | 15.87 | 15.75 | 15.71 | 15.61 | 15.63 | 15.54 | 15.56 | 15.52 |
| 11.02 | 16.27 | 16.17 | 16.06 | 15.95 | 15.78 | 15.78 | 15.78 | 15.75 | 15.68 | 15.69 | 15.70 |
| 11.22 | 16.06 | 16.00 | 15.79 | 15.83 | 15.62 | 15.60 | 15.53 | 15.54 | 15.54 | 15.54 | 15.53 |
| 11.42 | 15.85 | 15.69 | 15.56 | 15.47 | 15.36 | 15.29 | 15.33 | 15.26 | 15.19 | 15.16 | 15.20 |
| 11.62 | 16.27 | 16.19 | 16.07 | 15.95 | 15.86 | 15.82 | 15.80 | 15.70 | 15.68 | 15.61 | 15.63 |
| 11.82 | 16.23 | 16.06 | 15.88 | 15.81 | 15.77 | 15.70 | 15.59 | 15.60 | 15.62 | 15.57 | 15.59 |
| 12.02 | 16.33 | 16.26 | 16.02 | 15.92 | 15.83 | 15.75 | 15.72 | 15.69 | 15.61 | 15.65 | 15.56 |
| 12.22 | 16.50 | 16.40 | 16.18 | 16.08 | 16.06 | 15.92 | 15.91 | 15.98 | 15.88 | 15.83 | 15.85 |
| 12.42 | 16.06 | 15.92 | 15.71 | 15.67 | 15.60 | 15.50 | 15.45 | 15.49 | 15.41 | 15.38 | 15.39 |
| 12.62 | 16.23 | 16.09 | 15.88 | 15.80 | 15.70 | 15.71 | 15.60 | 15.63 | 15.55 | 15.52 | 15.52 |
| 12.82 | 16.34 | 16.21 | 16.03 | 15.91 | 15.79 | 15.78 | 15.72 | 15.70 | 15.65 | 15.62 | 15.63 |

|       |       |       |       |       |       |       |       |       |       |       |       |
|-------|-------|-------|-------|-------|-------|-------|-------|-------|-------|-------|-------|
| 13.02 | 16.54 | 16.37 | 16.19 | 16.07 | 15.91 | 15.87 | 15.86 | 15.83 | 15.72 | 15.67 | 15.69 |
| 13.22 | 16.41 | 16.34 | 16.09 | 15.95 | 15.95 | 15.77 | 15.76 | 15.81 | 15.69 | 15.62 | 15.71 |
| 13.42 | 16.32 | 16.28 | 16.10 | 16.00 | 15.80 | 15.75 | 15.69 | 15.77 | 15.61 | 15.63 | 15.55 |
| 13.50 | 16.25 | 16.09 | 15.87 | 15.85 | 15.70 | 15.76 | 15.53 | 15.56 | 15.56 | 15.50 | 15.49 |
| 13.59 | 16.43 | 16.35 | 16.19 | 16.08 | 16.02 | 15.97 | 15.90 | 15.82 | 15.81 | 15.73 | 15.75 |
| 13.68 | 16.32 | 16.23 | 16.06 | 15.88 | 15.89 | 15.79 | 15.73 | 15.77 | 15.67 | 15.57 | 15.64 |
| 13.78 | 15.97 | 15.92 | 15.66 | 15.54 | 15.42 | 15.39 | 15.33 | 15.38 | 15.23 | 15.22 | 15.18 |
| 13.88 | 16.26 | 16.15 | 15.93 | 15.95 | 15.83 | 15.76 | 15.59 | 15.72 | 15.54 | 15.53 | 15.53 |
| 14.00 | 16.57 | 16.36 | 16.21 | 16.13 | 16.04 | 16.06 | 15.87 | 15.84 | 15.86 | 15.84 | 15.79 |
| 14.12 | 16.42 | 16.26 | 16.10 | 16.00 | 15.93 | 15.85 | 15.64 | 15.74 | 15.75 | 15.68 | 15.53 |
| 14.25 | 16.25 | 16.15 | 15.96 | 15.87 | 15.74 | 15.71 | 15.68 | 15.64 | 15.53 | 15.50 | 15.49 |
| 14.40 | 16.71 | 16.60 | 16.47 | 16.36 | 16.21 | 16.14 | 16.15 | 16.04 | 16.01 | 15.97 | 15.96 |
| 14.55 | 16.25 | 16.09 | 15.93 | 15.82 | 15.71 | 15.60 | 15.59 | 15.59 | 15.54 | 15.49 | 15.45 |
| 14.72 | 16.31 | 16.25 | 16.07 | 15.93 | 15.87 | 15.77 | 15.70 | 15.76 | 15.64 | 15.58 | 15.61 |
| 14.90 | 16.18 | 16.12 | 15.98 | 15.80 | 15.74 | 15.63 | 15.60 | 15.56 | 15.52 | 15.41 | 15.43 |
| 15.09 | 16.13 | 16.01 | 15.81 | 15.68 | 15.56 | 15.63 | 15.49 | 15.45 | 15.40 | 15.36 | 15.33 |
| 15.30 | 16.48 | 16.32 | 16.14 | 16.05 | 15.87 | 15.84 | 15.80 | 15.81 | 15.69 | 15.76 | 15.71 |
| 15.53 | 16.68 | 16.60 | 16.37 | 16.29 | 16.18 | 16.19 | 16.00 | 16.02 | 16.04 | 15.98 | 15.87 |
| 15.77 | 16.43 | 16.39 | 16.19 | 16.06 | 15.96 | 15.95 | 15.85 | 15.77 | 15.76 | 15.76 | 15.64 |
| 16.04 | 16.67 | 16.48 | 16.32 | 16.22 | 16.12 | 16.03 | 15.95 | 15.91 | 15.83 | 15.83 | 15.69 |
| 16.32 | 16.63 | 16.44 | 16.18 | 16.08 | 15.96 | 15.91 | 15.83 | 15.80 | 15.72 | 15.73 | 15.74 |
| 16.63 | 16.76 | 16.67 | 16.46 | 16.31 | 16.21 | 16.05 | 16.04 | 16.04 | 15.92 | 15.90 | 15.91 |
| 16.96 | 16.97 | 16.83 | 16.64 | 16.50 | 16.48 | 16.46 | 16.25 | 16.28 | 16.20 | 16.15 | 16.13 |
| 17.31 | 16.63 | 16.48 | 16.32 | 16.18 | 15.95 | 16.01 | 15.85 | 15.88 | 15.82 | 15.78 | 15.69 |
| 17.70 | 17.06 | 17.03 | 16.82 | 16.73 | 16.56 | 16.41 | 16.32 | 16.35 | 16.25 | 16.28 | 16.26 |
| 18.11 | 16.27 | 16.18 | 15.99 | 15.86 | 15.70 | 15.64 | 15.72 | 15.62 | 15.56 | 15.46 | 15.45 |
| 18.56 | 16.61 | 16.53 | 16.30 | 16.16 | 16.03 | 15.98 | 15.86 | 15.85 | 15.74 | 15.74 | 15.64 |
| 19.04 | 16.68 | 16.55 | 16.33 | 16.26 | 16.14 | 15.90 | 15.87 | 15.87 | 15.76 | 15.79 | 15.80 |
| 19.56 | 17.02 | 16.87 | 16.70 | 16.59 | 16.40 | 16.32 | 16.25 | 16.21 | 16.13 | 16.07 | 15.98 |
| 20.12 | 16.83 | 16.79 | 16.58 | 16.47 | 16.34 | 16.21 | 16.15 | 16.16 | 16.03 | 16.00 | 15.94 |
| 20.72 | 16.99 | 16.97 | 16.79 | 16.67 | 16.53 | 16.35 | 16.33 | 16.30 | 16.18 | 16.13 | 16.19 |
| 21.37 | 17.04 | 16.95 | 16.74 | 16.57 | 16.53 | 16.43 | 16.29 | 16.29 | 16.21 | 16.23 | 16.12 |
| 22.08 | 17.09 | 16.95 | 16.75 | 16.55 | 16.45 | 16.37 | 16.27 | 16.24 | 16.14 | 15.98 | 16.03 |
| 22.84 | 17.40 | 17.28 | 17.03 | 16.97 | 16.81 | 16.70 | 16.57 | 16.60 | 16.51 | 16.39 | 16.39 |
| 23.65 | 16.82 | 16.65 | 16.44 | 16.40 | 16.22 | 16.05 | 15.97 | 15.94 | 15.81 | 15.85 | 15.74 |
| 24.54 | 17.28 | 17.09 | 16.91 | 16.74 | 16.67 | 16.60 | 16.40 | 16.47 | 16.36 | 16.24 | 16.26 |
| 25.49 | 17.52 | 17.38 | 17.20 | 17.00 | 16.91 | 16.73 | 16.71 | 16.62 | 16.52 | 16.44 | 16.40 |
| 26.51 | 16.96 | 16.84 | 16.59 | 16.49 | 16.30 | 16.21 | 16.12 | 16.13 | 16.01 | 15.98 | 15.87 |
| 27.62 | 17.61 | 17.48 | 17.21 | 17.12 | 17.03 | 16.84 | 16.77 | 16.76 | 16.68 | 16.59 | 16.54 |
| 28.81 | 17.63 | 17.54 | 17.33 | 17.12 | 17.06 | 16.92 | 16.85 | 16.73 | 16.68 | 16.64 | 16.52 |
| 30.10 | 17.18 | 17.06 | 16.84 | 16.75 | 16.52 | 16.46 | 16.26 | 16.29 | 16.18 | 16.12 | 16.10 |
| 31.49 | 17.92 | 17.74 | 17.43 | 17.41 | 17.26 | 17.14 | 16.97 | 16.88 | 16.84 | 16.76 | 16.70 |
| 32.98 | 17.63 | 17.50 | 17.32 | 17.15 | 16.92 | 16.90 | 16.74 | 16.70 | 16.56 | 16.48 | 16.40 |
| 34.60 | 18.07 | 18.02 | 17.76 | 17.60 | 17.43 | 17.29 | 17.21 | 17.17 | 17.03 | 16.98 | 16.90 |
| 36.34 | 17.86 | 17.81 | 17.49 | 17.34 | 17.18 | 17.08 | 16.93 | 16.92 | 16.88 | 16.74 | 16.66 |
| 38.21 | 18.56 | 18.46 | 18.20 | 18.08 | 17.93 | 17.85 | 17.63 | 17.58 | 17.48 | 17.38 | 17.34 |
| 40.24 | 18.16 | 18.05 | 17.79 | 17.67 | 17.52 | 17.41 | 17.32 | 17.26 | 17.09 | 17.05 | 16.93 |
| 42.42 | 18.04 | 17.94 | 17.63 | 17.41 | 17.34 | 17.14 | 17.05 | 17.10 | 16.87 | 16.81 | 16.74 |
| 44.78 | 18.20 | 18.09 | 17.83 | 17.65 | 17.55 | 17.41 | 17.28 | 17.24 | 17.07 | 17.00 | 16.95 |
| 47.32 | 18.12 | 18.00 | 17.74 | 17.58 | 17.44 | 17.28 | 17.15 | 17.19 | 17.02 | 16.91 | 16.84 |

|         |       |       |       |       |       |       |       |       |       |       |       |
|---------|-------|-------|-------|-------|-------|-------|-------|-------|-------|-------|-------|
| 50.06   | 18.52 | 18.35 | 18.18 | 17.99 | 17.87 | 17.67 | 17.57 | 17.49 | 17.32 | 17.20 | 17.22 |
| 53.01   | 18.61 | 18.47 | 18.23 | 18.00 | 17.90 | 17.80 | 17.64 | 17.55 | 17.43 | 17.40 | 17.26 |
| 56.20   | 18.85 | 18.74 | 18.42 | 18.32 | 18.19 | 18.06 | 17.93 | 17.78 | 17.62 | 17.50 | 17.43 |
| 59.64   | 19.37 | 19.28 | 18.95 | 18.87 | 18.67 | 18.51 | 18.34 | 18.37 | 18.17 | 18.05 | 17.97 |
| 63.34   | 18.77 | 18.58 | 18.34 | 18.20 | 18.03 | 17.84 | 17.70 | 17.65 | 17.47 | 17.37 | 17.28 |
| 67.34   | 19.24 | 19.02 | 18.84 | 18.59 | 18.40 | 18.29 | 18.13 | 18.04 | 17.92 | 17.78 | 17.65 |
| 71.65   | 19.71 | 19.58 | 19.31 | 19.09 | 18.98 | 18.83 | 18.65 | 18.56 | 18.46 | 18.29 | 18.27 |
| 76.30   | 19.78 | 19.55 | 19.24 | 19.11 | 18.98 | 18.75 | 18.64 | 18.55 | 18.36 | 18.20 | 18.08 |
| 81.32   | 20.36 | 20.17 | 19.89 | 19.68 | 19.44 | 19.27 | 19.11 | 19.09 | 18.83 | 18.70 | 18.64 |
| 86.73   | 20.50 | 20.32 | 20.06 | 19.87 | 19.69 | 19.52 | 19.32 | 19.29 | 19.09 | 18.96 | 18.85 |
| 92.56   | 20.73 | 20.58 | 20.31 | 20.12 | 19.93 | 19.71 | 19.53 | 19.44 | 19.34 | 19.13 | 18.98 |
| 98.85   | 20.44 | 20.28 | 20.02 | 19.77 | 19.67 | 19.49 | 19.33 | 19.17 | 19.03 | 18.84 | 18.67 |
| 105.64  | 21.26 | 21.01 | 20.82 | 20.56 | 20.35 | 20.22 | 20.07 | 19.95 | 19.73 | 19.49 | 19.33 |
| 112.96  | 21.56 | 21.36 | 21.09 | 20.86 | 20.64 | 20.43 | 20.26 | 20.16 | 19.98 | 19.86 | 19.69 |
| 120.85  | 21.58 | 21.38 | 21.18 | 20.86 | 20.75 | 20.52 | 20.33 | 20.17 | 20.01 | 19.86 | 19.66 |
| 129.36  | 22.11 | 21.92 | 21.72 | 21.40 | 21.17 | 21.01 | 20.77 | 20.69 | 20.48 | 20.26 | 20.07 |
| 138.55  | 22.34 | 22.16 | 21.84 | 21.62 | 21.42 | 21.17 | 20.94 | 20.84 | 20.58 | 20.38 | 20.27 |
| 148.45  | 22.17 | 22.04 | 21.73 | 21.50 | 21.23 | 21.04 | 20.87 | 20.73 | 20.47 | 20.27 | 20.08 |
| 159.13  | 22.69 | 22.41 | 22.12 | 21.92 | 21.70 | 21.56 | 21.23 | 21.10 | 20.90 | 20.70 | 20.52 |
| 170.65  | 22.98 | 22.74 | 22.46 | 22.25 | 22.03 | 21.83 | 21.53 | 21.45 | 21.21 | 20.95 | 20.84 |
| 183.07  | 23.53 | 23.31 | 23.00 | 22.76 | 22.53 | 22.33 | 22.07 | 21.94 | 21.72 | 21.45 | 21.30 |
| 196.47  | 23.62 | 23.43 | 23.09 | 22.84 | 22.59 | 22.42 | 22.19 | 21.95 | 21.70 | 21.50 | 21.38 |
| 210.91  | 24.13 | 23.83 | 23.54 | 23.31 | 23.06 | 22.78 | 22.61 | 22.45 | 22.19 | 21.96 | 21.73 |
| 226.50  | 24.39 | 24.08 | 23.87 | 23.58 | 23.23 | 23.07 | 22.80 | 22.64 | 22.40 | 22.12 | 21.90 |
| 243.31  | 24.50 | 24.33 | 24.06 | 23.83 | 23.50 | 23.27 | 23.01 | 22.79 | 22.51 | 22.28 | 22.02 |
| 261.43  | 25.28 | 24.99 | 24.73 | 24.44 | 24.17 | 23.89 | 23.59 | 23.51 | 23.21 | 22.91 | 22.78 |
| 280.98  | 25.33 | 25.07 | 24.72 | 24.39 | 24.18 | 23.88 | 23.70 | 23.44 | 23.17 | 22.97 | 22.73 |
| 302.07  | 25.54 | 25.32 | 24.97 | 24.69 | 24.45 | 24.17 | 23.89 | 23.71 | 23.37 | 23.13 | 22.85 |
| 324.81  | 26.05 | 25.92 | 25.56 | 25.19 | 25.00 | 24.60 | 24.40 | 24.19 | 23.89 | 23.67 | 23.34 |
| 349.33  | 26.31 | 26.02 | 25.69 | 25.38 | 25.04 | 24.83 | 24.52 | 24.39 | 24.08 | 23.71 | 23.49 |
| 375.79  | 26.69 | 26.51 | 26.11 | 25.79 | 25.54 | 25.19 | 24.90 | 24.68 | 24.41 | 24.06 | 23.83 |
| 404.31  | 26.65 | 26.39 | 26.10 | 25.73 | 25.48 | 25.22 | 24.87 | 24.63 | 24.33 | 24.06 | 23.73 |
| 435.08  | 27.15 | 26.89 | 26.53 | 26.24 | 25.91 | 25.57 | 25.29 | 25.06 | 24.70 | 24.48 | 24.18 |
| 468.27  | 27.36 | 27.07 | 26.80 | 26.40 | 26.19 | 25.85 | 25.48 | 25.31 | 24.87 | 24.71 | 24.35 |
| 504.06  | 27.82 | 27.51 | 27.22 | 26.92 | 26.51 | 26.27 | 25.87 | 25.69 | 25.30 | 25.00 | 24.80 |
| 542.66  | 27.95 | 27.66 | 27.25 | 26.99 | 26.68 | 26.34 | 26.06 | 25.77 | 25.37 | 25.11 | 24.82 |
| 584.29  | 28.24 | 27.90 | 27.52 | 27.23 | 26.92 | 26.60 | 26.30 | 26.01 | 25.56 | 25.27 | 25.06 |
| 629.18  | 28.37 | 28.14 | 27.78 | 27.38 | 27.10 | 26.80 | 26.38 | 26.10 | 25.81 | 25.45 | 25.10 |
| 677.61  | 28.91 | 28.64 | 28.27 | 27.95 | 27.57 | 27.31 | 26.88 | 26.58 | 26.26 | 25.87 | 25.59 |
| 729.83  | 28.91 | 28.64 | 28.17 | 27.87 | 27.47 | 27.23 | 26.83 | 26.58 | 26.19 | 25.84 | 25.55 |
| 786.16  | 29.20 | 28.93 | 28.64 | 28.17 | 27.85 | 27.53 | 27.16 | 26.87 | 26.52 | 26.14 | 25.88 |
| 846.90  | 29.14 | 28.87 | 28.45 | 28.19 | 27.76 | 27.47 | 27.17 | 26.79 | 26.44 | 26.15 | 25.78 |
| 912.42  | 29.37 | 29.10 | 28.78 | 28.37 | 28.04 | 27.69 | 27.31 | 27.05 | 26.67 | 26.35 | 26.02 |
| 983.08  | 29.55 | 29.33 | 28.82 | 28.42 | 28.20 | 27.79 | 27.43 | 27.14 | 26.74 | 26.36 | 26.07 |
| 1059.29 | 29.75 | 29.39 | 29.03 | 28.66 | 28.26 | 27.97 | 27.57 | 27.35 | 26.91 | 26.52 | 26.19 |
| 1141.48 | 29.57 | 29.27 | 28.89 | 28.57 | 28.24 | 27.92 | 27.54 | 27.25 | 26.82 | 26.47 | 26.07 |
| 1230.13 | 29.50 | 29.29 | 28.82 | 28.49 | 28.11 | 27.75 | 27.36 | 27.13 | 26.68 | 26.29 | 25.93 |
| 1325.73 | 29.73 | 29.37 | 29.01 | 28.74 | 28.32 | 28.01 | 27.48 | 27.34 | 26.82 | 26.44 | 26.15 |
| 1428.84 | 29.60 | 29.29 | 28.91 | 28.52 | 28.11 | 27.84 | 27.37 | 27.21 | 26.82 | 26.39 | 26.06 |
| 1540.05 | 29.81 | 29.50 | 29.12 | 28.75 | 28.45 | 28.05 | 27.66 | 27.36 | 26.99 | 26.67 | 26.28 |

|         |       |       |       |       |       |       |       |       |       |       |       |
|---------|-------|-------|-------|-------|-------|-------|-------|-------|-------|-------|-------|
| 1659.99 | 29.78 | 29.45 | 29.03 | 28.76 | 28.39 | 27.95 | 27.59 | 27.26 | 26.86 | 26.58 | 26.18 |
| 1789.34 | 29.57 | 29.33 | 28.87 | 28.55 | 28.19 | 27.86 | 27.46 | 27.17 | 26.76 | 26.43 | 26.08 |
| 1928.85 | 29.66 | 29.39 | 28.96 | 28.63 | 28.23 | 27.92 | 27.52 | 27.16 | 26.83 | 26.47 | 26.11 |
| 2079.31 | 29.55 | 29.32 | 28.83 | 28.48 | 28.18 | 27.79 | 27.48 | 27.15 | 26.72 | 26.43 | 26.10 |
| 2241.59 | 29.43 | 29.14 | 28.77 | 28.43 | 27.98 | 27.73 | 27.32 | 27.06 | 26.63 | 26.24 | 25.96 |
| 2416.60 | 29.36 | 29.08 | 28.70 | 28.24 | 27.95 | 27.53 | 27.17 | 26.89 | 26.47 | 26.11 | 25.78 |
| 2605.36 | 29.30 | 29.06 | 28.62 | 28.24 | 27.87 | 27.48 | 27.19 | 26.80 | 26.45 | 26.06 | 25.74 |
| 2808.94 | 29.03 | 28.81 | 28.37 | 28.05 | 27.61 | 27.34 | 26.96 | 26.68 | 26.27 | 25.87 | 25.56 |
| 3028.50 | 28.90 | 28.64 | 28.20 | 27.83 | 27.47 | 27.12 | 26.75 | 26.50 | 26.15 | 25.65 | 25.47 |
| 3265.30 | 28.81 | 28.50 | 28.04 | 27.71 | 27.43 | 26.99 | 26.65 | 26.36 | 25.90 | 25.61 | 25.25 |
| 3520.69 | 28.47 | 28.21 | 27.72 | 27.39 | 27.06 | 26.70 | 26.27 | 26.01 | 25.67 | 25.20 | 24.90 |
| 3796.13 | 28.28 | 27.99 | 27.56 | 27.28 | 26.88 | 26.53 | 26.15 | 25.82 | 25.45 | 25.10 | 24.80 |

| Wavelength (nm) / Time (ps) | 616.05 | 617.48 | 618.90 | 620.32 | 621.75 | 623.17 | 624.60 | 626.02 | 627.44 | 628.87 | 630.29 |
|-----------------------------|--------|--------|--------|--------|--------|--------|--------|--------|--------|--------|--------|
| -3.78                       | -0.02  | 0.00   | -0.02  | -0.07  | 0.02   | -0.07  | 0.03   | -0.08  | -0.07  | 0.03   | -0.10  |
| -3.28                       | -0.02  | 0.01   | -0.03  | -0.07  | -0.06  | 0.01   | -0.08  | -0.04  | -0.03  | -0.04  | -0.08  |
| -2.78                       | 0.05   | 0.03   | -0.01  | 0.02   | 0.02   | -0.01  | 0.01   | 0.01   | -0.01  | 0.04   | 0.03   |
| -2.28                       | -0.05  | 0.00   | 0.01   | 0.04   | -0.01  | 0.04   | 0.01   | 0.02   | -0.04  | 0.03   | -0.01  |
| -1.78                       | -0.02  | -0.06  | -0.02  | -0.07  | -0.09  | -0.12  | -0.07  | -0.11  | -0.08  | -0.14  | -0.08  |
| -1.28                       | 0.06   | 0.04   | 0.03   | 0.10   | 0.00   | 0.01   | 0.05   | 0.05   | 0.11   | 0.06   | 0.05   |
| -0.78                       | 0.04   | 0.01   | 0.06   | 0.05   | 0.14   | 0.12   | 0.08   | 0.10   | 0.17   | 0.10   | 0.19   |
| -0.28                       | -0.05  | -0.02  | -0.03  | 0.00   | -0.03  | 0.02   | -0.03  | 0.04   | -0.04  | -0.08  | 0.00   |
| -0.18                       | -0.01  | 0.03   | 0.08   | 0.01   | 0.05   | -0.03  | 0.07   | -0.03  | 0.00   | 0.00   | 0.04   |
| -0.08                       | -0.05  | 0.01   | 0.00   | 0.07   | 0.04   | 0.09   | 0.06   | 0.03   | 0.05   | 0.11   | 0.05   |
| 0.02                        | 0.07   | 0.07   | 0.09   | 0.09   | 0.17   | 0.12   | 0.17   | 0.03   | 0.08   | 0.14   | 0.08   |
| 0.12                        | -0.01  | 0.04   | -0.01  | 0.02   | 0.05   | -0.04  | 0.06   | 0.02   | 0.00   | 0.10   | 0.07   |
| 0.22                        | 0.00   | 0.12   | 0.07   | 0.08   | 0.05   | 0.00   | 0.04   | 0.07   | 0.03   | 0.04   | 0.06   |
| 0.27                        | -0.03  | 0.02   | 0.04   | 0.03   | 0.08   | 0.02   | 0.11   | -0.05  | 0.07   | 0.12   | 0.07   |
| 0.32                        | -0.03  | 0.05   | 0.05   | -0.09  | -0.03  | -0.09  | -0.05  | -0.02  | -0.05  | -0.03  | -0.13  |
| 0.37                        | -0.02  | 0.02   | -0.04  | -0.08  | -0.05  | 0.00   | 0.00   | -0.06  | -0.07  | 0.04   | -0.09  |
| 0.42                        | -0.09  | -0.04  | -0.06  | -0.10  | -0.09  | -0.10  | -0.09  | -0.07  | -0.09  | -0.02  | 0.01   |
| 0.47                        | 0.02   | 0.04   | 0.03   | 0.03   | 0.02   | 0.05   | 0.12   | 0.12   | 0.15   | 0.13   | 0.11   |
| 0.52                        | -0.01  | 0.02   | 0.08   | 0.05   | 0.07   | 0.03   | 0.08   | 0.06   | 0.08   | 0.03   | 0.04   |
| 0.57                        | -0.06  | -0.05  | -0.04  | -0.05  | -0.09  | -0.14  | -0.11  | -0.13  | -0.04  | -0.07  | -0.11  |
| 0.62                        | -0.02  | -0.03  | -0.03  | 0.01   | -0.03  | -0.12  | -0.03  | -0.01  | -0.06  | -0.03  | -0.02  |
| 0.67                        | 0.05   | 0.02   | 0.01   | 0.00   | 0.00   | -0.05  | 0.12   | -0.01  | 0.01   | 0.06   | 0.06   |
| 0.72                        | -0.02  | -0.08  | 0.05   | 0.02   | 0.01   | -0.09  | 0.10   | -0.01  | 0.00   | 0.03   | 0.03   |
| 0.77                        | 0.08   | 0.03   | 0.00   | -0.03  | -0.01  | -0.03  | 0.07   | -0.07  | 0.02   | -0.02  | 0.07   |
| 0.82                        | -0.01  | 0.07   | 0.00   | 0.00   | 0.02   | 0.02   | 0.02   | 0.00   | -0.02  | 0.04   | 0.06   |
| 0.87                        | 0.05   | 0.03   | 0.04   | -0.03  | 0.01   | -0.04  | -0.02  | -0.01  | 0.06   | 0.04   | -0.05  |
| 0.92                        | 0.00   | 0.12   | 0.07   | 0.18   | 0.10   | 0.06   | 0.10   | 0.11   | 0.09   | 0.15   | 0.18   |
| 0.97                        | -0.06  | -0.03  | -0.02  | -0.10  | -0.09  | -0.10  | -0.07  | -0.05  | -0.05  | -0.10  | -0.10  |
| 1.02                        | 0.10   | 0.05   | 0.08   | 0.08   | 0.09   | 0.09   | 0.04   | 0.04   | 0.10   | 0.05   | 0.06   |
| 1.07                        | 0.04   | 0.00   | 0.07   | 0.10   | 0.11   | 0.05   | 0.11   | 0.04   | 0.13   | 0.14   | 0.08   |
| 1.12                        | 0.10   | 0.06   | 0.02   | 0.02   | 0.13   | -0.01  | 0.14   | 0.05   | 0.07   | 0.11   | 0.03   |
| 1.17                        | 0.04   | 0.19   | 0.13   | 0.00   | 0.05   | 0.10   | 0.11   | 0.06   | 0.03   | 0.11   | 0.10   |
| 1.22                        | 0.08   | 0.20   | 0.07   | -0.07  | -0.10  | 0.05   | 0.24   | 0.20   | 0.06   | -0.09  | 0.02   |



|      |        |        |        |        |        |        |        |        |        |        |        |
|------|--------|--------|--------|--------|--------|--------|--------|--------|--------|--------|--------|
| 1.27 | -0.03  | 0.12   | 0.10   | -0.01  | -0.01  | -0.14  | -0.02  | -0.02  | -0.04  | -0.01  | -0.02  |
| 1.32 | 0.07   | -1.23  | -2.13  | -2.70  | -2.86  | -2.65  | -2.04  | -1.44  | -0.58  | 0.10   | 0.47   |
| 1.37 | -15.49 | -15.84 | -16.46 | -17.31 | -18.19 | -18.31 | -17.81 | -16.85 | -15.21 | -13.30 | -11.26 |
| 1.42 | 86.81  | 93.99  | 100.81 | 105.52 | 108.59 | 111.45 | 113.12 | 113.72 | 114.03 | 113.65 | 113.05 |
| 1.47 | 14.31  | 13.98  | 13.19  | 11.94  | 10.29  | 8.07   | 5.49   | 2.34   | -0.85  | -4.15  | -7.53  |
| 1.52 | 17.20  | 17.58  | 18.16  | 18.67  | 19.32  | 19.85  | 20.52  | 21.17  | 21.82  | 22.45  | 23.00  |
| 1.57 | 15.89  | 16.36  | 16.72  | 17.04  | 17.20  | 17.33  | 17.69  | 18.14  | 18.61  | 18.91  | 19.16  |
| 1.62 | 13.41  | 13.79  | 14.41  | 14.99  | 15.46  | 15.83  | 16.20  | 16.81  | 17.56  | 18.08  | 18.30  |
| 1.67 | 13.20  | 13.51  | 13.83  | 14.04  | 14.31  | 14.75  | 15.23  | 15.65  | 16.12  | 16.68  | 17.20  |
| 1.72 | 13.87  | 14.20  | 14.55  | 14.83  | 15.12  | 15.31  | 15.66  | 16.08  | 16.35  | 16.67  | 17.10  |
| 1.77 | 12.82  | 13.05  | 13.41  | 13.71  | 14.15  | 14.44  | 14.98  | 15.33  | 15.89  | 16.32  | 16.77  |
| 1.82 | 13.28  | 13.57  | 13.63  | 13.73  | 13.90  | 14.16  | 14.41  | 14.62  | 15.07  | 15.40  | 15.72  |
| 1.87 | 13.96  | 14.30  | 14.73  | 15.03  | 15.25  | 15.59  | 16.04  | 16.24  | 16.65  | 17.07  | 17.46  |
| 1.92 | 12.93  | 13.07  | 13.32  | 13.44  | 13.70  | 14.03  | 14.50  | 14.73  | 15.20  | 15.65  | 15.98  |
| 1.97 | 13.87  | 14.07  | 14.25  | 14.37  | 14.49  | 14.74  | 14.98  | 15.11  | 15.38  | 15.82  | 16.20  |
| 2.02 | 13.19  | 13.47  | 13.80  | 14.04  | 14.33  | 14.59  | 14.93  | 15.10  | 15.47  | 15.86  | 16.18  |
| 2.07 | 13.23  | 13.41  | 13.66  | 13.78  | 14.03  | 14.29  | 14.65  | 14.91  | 15.26  | 15.69  | 16.17  |
| 2.12 | 13.32  | 13.61  | 13.91  | 14.06  | 14.31  | 14.48  | 14.82  | 15.07  | 15.36  | 15.72  | 15.94  |
| 2.17 | 12.53  | 12.88  | 13.17  | 13.43  | 13.65  | 13.91  | 14.33  | 14.62  | 14.96  | 15.35  | 15.67  |
| 2.22 | 13.67  | 13.82  | 13.97  | 14.09  | 14.22  | 14.27  | 14.65  | 14.83  | 15.13  | 15.43  | 15.82  |
| 2.27 | 14.02  | 14.35  | 14.62  | 14.83  | 15.10  | 15.29  | 15.64  | 15.84  | 16.14  | 16.50  | 16.83  |
| 2.32 | 12.94  | 13.05  | 13.24  | 13.53  | 13.76  | 13.92  | 14.35  | 14.53  | 14.88  | 15.19  | 15.59  |
| 2.37 | 13.83  | 13.97  | 14.11  | 14.25  | 14.44  | 14.58  | 14.77  | 14.97  | 15.27  | 15.55  | 15.88  |
| 2.42 | 13.49  | 13.71  | 13.99  | 14.12  | 14.40  | 14.66  | 15.00  | 15.22  | 15.55  | 15.80  | 16.16  |
| 2.47 | 13.80  | 13.99  | 14.18  | 14.28  | 14.44  | 14.74  | 15.10  | 15.29  | 15.61  | 15.97  | 16.32  |
| 2.52 | 13.86  | 14.03  | 14.24  | 14.38  | 14.48  | 14.65  | 14.98  | 15.14  | 15.42  | 15.73  | 15.97  |
| 2.57 | 13.90  | 14.10  | 14.37  | 14.61  | 14.81  | 15.02  | 15.41  | 15.62  | 15.90  | 16.23  | 16.48  |
| 2.62 | 13.94  | 14.17  | 14.25  | 14.38  | 14.54  | 14.65  | 14.97  | 15.14  | 15.45  | 15.83  | 16.16  |
| 2.67 | 13.85  | 14.00  | 14.24  | 14.44  | 14.65  | 14.78  | 15.00  | 15.29  | 15.48  | 15.76  | 16.04  |
| 2.72 | 13.62  | 13.81  | 13.96  | 14.17  | 14.37  | 14.53  | 14.82  | 14.99  | 15.27  | 15.63  | 15.87  |
| 2.77 | 14.15  | 14.24  | 14.43  | 14.43  | 14.70  | 14.76  | 15.08  | 15.22  | 15.52  | 15.77  | 16.06  |
| 2.82 | 13.58  | 13.84  | 14.03  | 14.23  | 14.44  | 14.63  | 14.97  | 15.11  | 15.36  | 15.62  | 15.88  |
| 2.87 | 13.71  | 13.90  | 14.04  | 14.22  | 14.45  | 14.59  | 14.84  | 15.07  | 15.40  | 15.72  | 15.98  |
| 2.92 | 14.23  | 14.42  | 14.60  | 14.68  | 14.88  | 15.06  | 15.23  | 15.42  | 15.68  | 15.96  | 16.17  |
| 2.97 | 13.77  | 14.02  | 14.18  | 14.37  | 14.49  | 14.65  | 14.97  | 15.13  | 15.48  | 15.72  | 16.00  |
| 3.02 | 14.29  | 14.38  | 14.58  | 14.71  | 14.81  | 15.02  | 15.30  | 15.43  | 15.72  | 16.08  | 16.29  |
| 3.07 | 13.91  | 14.12  | 14.20  | 14.44  | 14.62  | 14.75  | 14.99  | 15.16  | 15.48  | 15.69  | 15.97  |
| 3.12 | 13.64  | 13.76  | 14.04  | 14.18  | 14.30  | 14.48  | 14.78  | 15.01  | 15.28  | 15.54  | 15.87  |
| 3.17 | 14.19  | 14.36  | 14.48  | 14.68  | 14.74  | 14.93  | 15.18  | 15.35  | 15.66  | 15.91  | 16.18  |
| 3.22 | 14.25  | 14.44  | 14.63  | 14.89  | 14.97  | 15.15  | 15.40  | 15.56  | 15.85  | 16.23  | 16.33  |
| 3.42 | 14.48  | 14.66  | 14.81  | 14.87  | 15.07  | 15.17  | 15.45  | 15.65  | 15.88  | 16.16  | 16.42  |
| 3.62 | 15.03  | 15.15  | 15.36  | 15.49  | 15.58  | 15.82  | 16.03  | 16.19  | 16.49  | 16.77  | 16.96  |
| 3.82 | 14.42  | 14.58  | 14.74  | 14.85  | 15.00  | 15.13  | 15.42  | 15.48  | 15.76  | 16.06  | 16.27  |
| 4.02 | 15.10  | 15.24  | 15.40  | 15.55  | 15.74  | 15.84  | 16.11  | 16.31  | 16.52  | 16.83  | 17.04  |
| 4.22 | 14.61  | 14.70  | 14.88  | 15.04  | 15.08  | 15.27  | 15.50  | 15.65  | 15.96  | 16.15  | 16.43  |
| 4.42 | 14.77  | 14.93  | 15.05  | 15.18  | 15.39  | 15.46  | 15.66  | 15.75  | 16.04  | 16.28  | 16.59  |
| 4.62 | 15.11  | 15.20  | 15.41  | 15.46  | 15.60  | 15.86  | 16.00  | 16.14  | 16.44  | 16.70  | 16.85  |
| 4.82 | 14.89  | 15.04  | 15.19  | 15.36  | 15.41  | 15.63  | 15.82  | 15.96  | 16.27  | 16.43  | 16.76  |
| 5.02 | 15.13  | 15.21  | 15.36  | 15.50  | 15.70  | 15.75  | 16.09  | 16.21  | 16.46  | 16.70  | 16.90  |
| 5.22 | 15.24  | 15.37  | 15.51  | 15.57  | 15.77  | 15.93  | 16.09  | 16.28  | 16.43  | 16.73  | 16.95  |

|       |       |       |       |       |       |       |       |       |       |       |       |
|-------|-------|-------|-------|-------|-------|-------|-------|-------|-------|-------|-------|
| 5.42  | 15.39 | 15.49 | 15.57 | 15.70 | 15.82 | 15.97 | 16.15 | 16.31 | 16.59 | 16.85 | 16.99 |
| 5.62  | 15.40 | 15.51 | 15.67 | 15.71 | 15.88 | 16.03 | 16.22 | 16.36 | 16.61 | 16.90 | 17.10 |
| 5.82  | 15.27 | 15.45 | 15.62 | 15.65 | 15.84 | 15.96 | 16.18 | 16.30 | 16.52 | 16.76 | 17.06 |
| 6.02  | 15.38 | 15.47 | 15.60 | 15.65 | 15.81 | 15.98 | 16.09 | 16.25 | 16.50 | 16.78 | 16.96 |
| 6.22  | 15.22 | 15.31 | 15.44 | 15.45 | 15.63 | 15.77 | 15.95 | 16.07 | 16.34 | 16.58 | 16.78 |
| 6.42  | 15.43 | 15.58 | 15.70 | 15.78 | 15.86 | 15.95 | 16.19 | 16.38 | 16.52 | 16.79 | 16.98 |
| 6.62  | 15.74 | 15.88 | 15.93 | 16.02 | 16.17 | 16.30 | 16.47 | 16.57 | 16.78 | 17.04 | 17.24 |
| 6.82  | 15.43 | 15.51 | 15.71 | 15.76 | 15.90 | 15.92 | 16.23 | 16.31 | 16.48 | 16.78 | 17.07 |
| 7.02  | 15.91 | 15.99 | 16.12 | 16.15 | 16.32 | 16.45 | 16.60 | 16.79 | 17.00 | 17.27 | 17.50 |
| 7.22  | 15.51 | 15.66 | 15.72 | 15.79 | 15.90 | 16.03 | 16.26 | 16.32 | 16.53 | 16.78 | 17.01 |
| 7.42  | 15.90 | 16.01 | 16.11 | 16.29 | 16.24 | 16.43 | 16.59 | 16.73 | 16.99 | 17.23 | 17.46 |
| 7.62  | 15.70 | 15.77 | 15.86 | 15.96 | 16.08 | 16.17 | 16.37 | 16.54 | 16.73 | 16.91 | 17.12 |
| 7.82  | 15.70 | 15.77 | 15.95 | 16.10 | 16.11 | 16.22 | 16.44 | 16.57 | 16.88 | 17.11 | 17.29 |
| 8.02  | 15.45 | 15.63 | 15.67 | 15.81 | 15.94 | 16.00 | 16.23 | 16.33 | 16.53 | 16.71 | 16.94 |
| 8.22  | 15.70 | 15.75 | 15.88 | 15.88 | 16.03 | 16.14 | 16.39 | 16.49 | 16.66 | 16.94 | 17.17 |
| 8.42  | 15.24 | 15.28 | 15.40 | 15.55 | 15.60 | 15.69 | 15.91 | 16.01 | 16.17 | 16.40 | 16.67 |
| 8.62  | 15.75 | 15.86 | 15.89 | 15.94 | 16.06 | 16.19 | 16.40 | 16.44 | 16.70 | 16.91 | 17.16 |
| 8.82  | 15.87 | 15.88 | 16.03 | 16.16 | 16.20 | 16.28 | 16.51 | 16.57 | 16.77 | 17.03 | 17.21 |
| 9.02  | 15.45 | 15.53 | 15.64 | 15.75 | 15.79 | 15.88 | 16.11 | 16.19 | 16.36 | 16.60 | 16.74 |
| 9.22  | 15.55 | 15.71 | 15.81 | 15.88 | 15.98 | 16.03 | 16.21 | 16.35 | 16.56 | 16.82 | 16.97 |
| 9.42  | 15.90 | 15.91 | 16.07 | 16.11 | 16.17 | 16.27 | 16.55 | 16.65 | 16.78 | 17.11 | 17.31 |
| 9.62  | 15.50 | 15.56 | 15.74 | 15.75 | 15.86 | 15.96 | 16.16 | 16.30 | 16.50 | 16.72 | 16.89 |
| 9.82  | 15.78 | 15.84 | 15.95 | 16.00 | 16.18 | 16.13 | 16.38 | 16.47 | 16.67 | 16.92 | 17.08 |
| 10.02 | 15.71 | 15.78 | 15.82 | 15.99 | 16.07 | 16.14 | 16.37 | 16.44 | 16.68 | 16.87 | 17.08 |
| 10.22 | 15.81 | 15.88 | 16.04 | 16.07 | 16.22 | 16.30 | 16.45 | 16.58 | 16.76 | 16.98 | 17.21 |
| 10.42 | 15.82 | 15.93 | 15.96 | 16.10 | 16.13 | 16.28 | 16.49 | 16.62 | 16.75 | 16.99 | 17.20 |
| 10.62 | 15.75 | 15.82 | 15.92 | 16.00 | 16.00 | 16.12 | 16.36 | 16.44 | 16.64 | 16.86 | 17.06 |
| 10.82 | 15.56 | 15.57 | 15.71 | 15.77 | 15.83 | 15.89 | 16.04 | 16.18 | 16.40 | 16.56 | 16.73 |
| 11.02 | 15.73 | 15.74 | 15.90 | 15.92 | 15.99 | 16.11 | 16.37 | 16.39 | 16.60 | 16.75 | 16.98 |
| 11.22 | 15.50 | 15.62 | 15.66 | 15.78 | 15.86 | 15.87 | 16.13 | 16.21 | 16.44 | 16.66 | 16.91 |
| 11.42 | 15.21 | 15.29 | 15.44 | 15.35 | 15.53 | 15.59 | 15.79 | 15.81 | 16.07 | 16.22 | 16.40 |
| 11.62 | 15.63 | 15.65 | 15.80 | 15.91 | 15.89 | 16.06 | 16.29 | 16.36 | 16.63 | 16.88 | 17.00 |
| 11.82 | 15.59 | 15.62 | 15.74 | 15.77 | 15.94 | 15.93 | 16.10 | 16.27 | 16.51 | 16.77 | 16.90 |
| 12.02 | 15.63 | 15.66 | 15.72 | 15.73 | 15.82 | 15.96 | 16.19 | 16.19 | 16.39 | 16.63 | 16.80 |
| 12.22 | 15.76 | 15.89 | 15.92 | 16.07 | 16.04 | 16.13 | 16.40 | 16.43 | 16.68 | 16.94 | 17.09 |
| 12.42 | 15.32 | 15.40 | 15.55 | 15.58 | 15.57 | 15.78 | 15.94 | 16.04 | 16.29 | 16.52 | 16.66 |
| 12.62 | 15.47 | 15.54 | 15.63 | 15.63 | 15.72 | 15.82 | 16.04 | 16.09 | 16.25 | 16.53 | 16.63 |
| 12.82 | 15.67 | 15.65 | 15.77 | 15.83 | 15.82 | 15.95 | 16.16 | 16.29 | 16.46 | 16.69 | 16.86 |
| 13.02 | 15.66 | 15.71 | 15.82 | 15.87 | 15.95 | 16.05 | 16.17 | 16.27 | 16.45 | 16.59 | 16.83 |
| 13.22 | 15.69 | 15.75 | 15.75 | 15.92 | 15.95 | 15.98 | 16.27 | 16.37 | 16.53 | 16.76 | 17.05 |
| 13.42 | 15.54 | 15.65 | 15.75 | 15.78 | 15.86 | 16.00 | 16.18 | 16.20 | 16.43 | 16.67 | 16.86 |
| 13.50 | 15.48 | 15.56 | 15.66 | 15.74 | 15.85 | 15.89 | 16.07 | 16.15 | 16.36 | 16.58 | 16.75 |
| 13.59 | 15.71 | 15.75 | 15.88 | 15.82 | 15.99 | 16.01 | 16.21 | 16.30 | 16.50 | 16.67 | 16.87 |
| 13.68 | 15.66 | 15.66 | 15.77 | 15.87 | 15.91 | 15.98 | 16.21 | 16.34 | 16.47 | 16.68 | 16.88 |
| 13.78 | 15.25 | 15.21 | 15.36 | 15.39 | 15.54 | 15.56 | 15.81 | 15.87 | 16.05 | 16.29 | 16.47 |
| 13.88 | 15.54 | 15.61 | 15.70 | 15.74 | 15.78 | 15.87 | 16.04 | 16.17 | 16.36 | 16.52 | 16.76 |
| 14.00 | 15.79 | 15.90 | 15.91 | 16.03 | 16.05 | 16.11 | 16.32 | 16.43 | 16.67 | 16.87 | 17.04 |
| 14.12 | 15.61 | 15.73 | 15.82 | 15.82 | 15.93 | 16.01 | 16.19 | 16.34 | 16.46 | 16.65 | 16.88 |
| 14.25 | 15.57 | 15.62 | 15.65 | 15.72 | 15.79 | 15.87 | 16.07 | 16.24 | 16.38 | 16.59 | 16.81 |
| 14.40 | 15.99 | 15.97 | 16.13 | 16.15 | 16.20 | 16.32 | 16.37 | 16.53 | 16.74 | 16.98 | 17.16 |

|       |       |       |       |       |       |       |       |       |       |       |       |
|-------|-------|-------|-------|-------|-------|-------|-------|-------|-------|-------|-------|
| 14.55 | 15.52 | 15.53 | 15.59 | 15.59 | 15.73 | 15.82 | 15.96 | 16.07 | 16.28 | 16.50 | 16.66 |
| 14.72 | 15.51 | 15.58 | 15.67 | 15.74 | 15.80 | 15.86 | 16.04 | 16.14 | 16.31 | 16.55 | 16.74 |
| 14.90 | 15.44 | 15.35 | 15.57 | 15.61 | 15.65 | 15.69 | 15.92 | 16.03 | 16.15 | 16.40 | 16.56 |
| 15.09 | 15.30 | 15.34 | 15.47 | 15.48 | 15.58 | 15.69 | 15.85 | 16.03 | 16.19 | 16.38 | 16.52 |
| 15.30 | 15.69 | 15.67 | 15.76 | 15.85 | 15.92 | 15.99 | 16.27 | 16.31 | 16.51 | 16.70 | 16.99 |
| 15.53 | 15.89 | 16.06 | 16.03 | 16.23 | 16.26 | 16.31 | 16.57 | 16.60 | 16.82 | 17.01 | 17.20 |
| 15.77 | 15.67 | 15.75 | 15.82 | 15.84 | 15.97 | 16.09 | 16.21 | 16.35 | 16.60 | 16.78 | 16.99 |
| 16.04 | 15.76 | 15.80 | 15.85 | 15.90 | 15.97 | 16.00 | 16.27 | 16.34 | 16.52 | 16.67 | 16.85 |
| 16.32 | 15.70 | 15.75 | 15.85 | 15.90 | 16.03 | 16.03 | 16.28 | 16.38 | 16.49 | 16.74 | 17.00 |
| 16.63 | 15.86 | 15.83 | 15.93 | 15.97 | 16.06 | 16.11 | 16.35 | 16.41 | 16.60 | 16.84 | 17.07 |
| 16.96 | 16.10 | 16.21 | 16.23 | 16.33 | 16.46 | 16.50 | 16.67 | 16.78 | 16.91 | 17.18 | 17.35 |
| 17.31 | 15.67 | 15.75 | 15.84 | 15.84 | 15.91 | 16.00 | 16.19 | 16.23 | 16.47 | 16.58 | 16.76 |
| 17.70 | 16.20 | 16.25 | 16.38 | 16.35 | 16.45 | 16.50 | 16.71 | 16.79 | 17.04 | 17.15 | 17.37 |
| 18.11 | 15.39 | 15.38 | 15.56 | 15.63 | 15.68 | 15.64 | 15.90 | 15.96 | 16.14 | 16.37 | 16.58 |
| 18.56 | 15.71 | 15.67 | 15.75 | 15.81 | 15.85 | 15.88 | 16.05 | 16.19 | 16.35 | 16.57 | 16.71 |
| 19.04 | 15.75 | 15.81 | 15.95 | 15.86 | 15.99 | 16.01 | 16.26 | 16.31 | 16.52 | 16.71 | 16.93 |
| 19.56 | 15.98 | 16.02 | 16.05 | 16.10 | 16.22 | 16.25 | 16.44 | 16.58 | 16.71 | 16.95 | 17.04 |
| 20.12 | 15.95 | 15.98 | 16.05 | 16.08 | 16.16 | 16.23 | 16.36 | 16.47 | 16.66 | 16.91 | 17.07 |
| 20.72 | 16.09 | 16.16 | 16.08 | 16.18 | 16.25 | 16.28 | 16.47 | 16.53 | 16.69 | 16.90 | 17.13 |
| 21.37 | 16.06 | 16.16 | 16.25 | 16.33 | 16.33 | 16.31 | 16.63 | 16.60 | 16.82 | 17.01 | 17.25 |
| 22.08 | 15.90 | 15.97 | 16.05 | 16.10 | 16.09 | 16.19 | 16.41 | 16.51 | 16.71 | 16.88 | 17.05 |
| 22.84 | 16.44 | 16.37 | 16.51 | 16.58 | 16.59 | 16.64 | 16.85 | 16.96 | 17.12 | 17.33 | 17.54 |
| 23.65 | 15.76 | 15.83 | 15.82 | 15.91 | 15.93 | 15.94 | 16.13 | 16.32 | 16.41 | 16.57 | 16.77 |
| 24.54 | 16.20 | 16.22 | 16.30 | 16.35 | 16.42 | 16.39 | 16.60 | 16.65 | 16.89 | 17.07 | 17.22 |
| 25.49 | 16.38 | 16.43 | 16.48 | 16.52 | 16.57 | 16.65 | 16.85 | 16.89 | 17.14 | 17.29 | 17.45 |
| 26.51 | 15.90 | 15.96 | 16.07 | 16.06 | 16.10 | 16.20 | 16.31 | 16.45 | 16.62 | 16.81 | 17.00 |
| 27.62 | 16.53 | 16.58 | 16.60 | 16.65 | 16.68 | 16.71 | 16.88 | 16.99 | 17.16 | 17.35 | 17.49 |
| 28.81 | 16.46 | 16.45 | 16.57 | 16.54 | 16.67 | 16.69 | 16.80 | 16.85 | 17.08 | 17.34 | 17.48 |
| 30.10 | 16.00 | 16.03 | 16.14 | 16.18 | 16.23 | 16.28 | 16.42 | 16.46 | 16.68 | 16.84 | 17.04 |
| 31.49 | 16.60 | 16.65 | 16.68 | 16.68 | 16.71 | 16.81 | 16.94 | 16.93 | 17.10 | 17.30 | 17.51 |
| 32.98 | 16.38 | 16.45 | 16.41 | 16.45 | 16.39 | 16.49 | 16.65 | 16.79 | 16.83 | 17.03 | 17.24 |
| 34.60 | 16.87 | 16.85 | 16.90 | 16.88 | 16.96 | 16.97 | 17.13 | 17.19 | 17.40 | 17.52 | 17.70 |
| 36.34 | 16.62 | 16.63 | 16.65 | 16.65 | 16.71 | 16.78 | 16.95 | 17.00 | 17.16 | 17.34 | 17.50 |
| 38.21 | 17.24 | 17.30 | 17.28 | 17.32 | 17.33 | 17.40 | 17.49 | 17.55 | 17.73 | 17.87 | 18.09 |
| 40.24 | 16.85 | 16.91 | 16.92 | 16.99 | 16.97 | 16.95 | 17.12 | 17.14 | 17.35 | 17.40 | 17.65 |
| 42.42 | 16.65 | 16.70 | 16.71 | 16.66 | 16.69 | 16.68 | 16.84 | 16.93 | 17.06 | 17.18 | 17.29 |
| 44.78 | 16.85 | 16.81 | 16.88 | 16.87 | 16.86 | 16.96 | 17.00 | 17.07 | 17.18 | 17.38 | 17.57 |
| 47.32 | 16.74 | 16.75 | 16.79 | 16.73 | 16.73 | 16.76 | 16.96 | 16.95 | 17.10 | 17.35 | 17.47 |
| 50.06 | 17.01 | 17.03 | 17.03 | 17.06 | 17.08 | 17.01 | 17.19 | 17.25 | 17.39 | 17.55 | 17.66 |
| 53.01 | 17.17 | 17.19 | 17.19 | 17.21 | 17.27 | 17.21 | 17.35 | 17.46 | 17.66 | 17.75 | 17.87 |
| 56.20 | 17.35 | 17.29 | 17.36 | 17.32 | 17.35 | 17.36 | 17.46 | 17.50 | 17.58 | 17.80 | 17.85 |
| 59.64 | 17.78 | 17.86 | 17.88 | 17.86 | 17.84 | 17.92 | 18.07 | 18.03 | 18.13 | 18.31 | 18.40 |
| 63.34 | 17.20 | 17.17 | 17.16 | 17.16 | 17.11 | 17.14 | 17.25 | 17.29 | 17.44 | 17.59 | 17.63 |
| 67.34 | 17.56 | 17.52 | 17.51 | 17.44 | 17.48 | 17.42 | 17.59 | 17.59 | 17.69 | 17.80 | 17.91 |
| 71.65 | 18.17 | 18.13 | 18.15 | 18.05 | 18.06 | 18.02 | 18.16 | 18.15 | 18.26 | 18.34 | 18.51 |
| 76.30 | 18.03 | 17.95 | 17.96 | 17.90 | 17.76 | 17.88 | 17.95 | 17.93 | 18.00 | 18.18 | 18.22 |
| 81.32 | 18.50 | 18.47 | 18.43 | 18.38 | 18.35 | 18.37 | 18.39 | 18.30 | 18.50 | 18.59 | 18.71 |
| 86.73 | 18.70 | 18.68 | 18.62 | 18.57 | 18.55 | 18.44 | 18.57 | 18.61 | 18.66 | 18.73 | 18.83 |
| 92.56 | 18.83 | 18.82 | 18.82 | 18.71 | 18.68 | 18.67 | 18.71 | 18.75 | 18.84 | 18.88 | 19.00 |
| 98.85 | 18.57 | 18.46 | 18.46 | 18.40 | 18.31 | 18.23 | 18.30 | 18.33 | 18.39 | 18.55 | 18.56 |

|         |       |       |       |       |       |       |       |       |       |       |       |
|---------|-------|-------|-------|-------|-------|-------|-------|-------|-------|-------|-------|
| 105.64  | 19.30 | 19.20 | 19.16 | 19.03 | 18.98 | 18.94 | 19.03 | 18.99 | 19.08 | 19.12 | 19.26 |
| 112.96  | 19.55 | 19.43 | 19.41 | 19.36 | 19.29 | 19.16 | 19.24 | 19.25 | 19.22 | 19.27 | 19.33 |
| 120.85  | 19.48 | 19.45 | 19.39 | 19.26 | 19.22 | 19.11 | 19.18 | 19.15 | 19.18 | 19.23 | 19.26 |
| 129.36  | 19.86 | 19.81 | 19.81 | 19.66 | 19.54 | 19.49 | 19.57 | 19.50 | 19.52 | 19.61 | 19.66 |
| 138.55  | 20.07 | 19.90 | 19.85 | 19.69 | 19.60 | 19.56 | 19.58 | 19.51 | 19.53 | 19.56 | 19.63 |
| 148.45  | 19.95 | 19.78 | 19.66 | 19.64 | 19.45 | 19.40 | 19.44 | 19.30 | 19.38 | 19.38 | 19.42 |
| 159.13  | 20.27 | 20.25 | 20.11 | 19.98 | 19.91 | 19.77 | 19.76 | 19.75 | 19.70 | 19.87 | 19.86 |
| 170.65  | 20.70 | 20.46 | 20.38 | 20.28 | 20.20 | 20.05 | 20.05 | 20.03 | 20.06 | 20.08 | 20.05 |
| 183.07  | 21.09 | 20.95 | 20.85 | 20.77 | 20.63 | 20.47 | 20.45 | 20.40 | 20.26 | 20.41 | 20.37 |
| 196.47  | 21.12 | 20.98 | 20.88 | 20.75 | 20.56 | 20.47 | 20.46 | 20.32 | 20.31 | 20.35 | 20.31 |
| 210.91  | 21.54 | 21.43 | 21.26 | 21.15 | 21.04 | 20.89 | 20.84 | 20.68 | 20.69 | 20.67 | 20.63 |
| 226.50  | 21.68 | 21.47 | 21.34 | 21.18 | 21.01 | 20.86 | 20.85 | 20.68 | 20.65 | 20.64 | 20.56 |
| 243.31  | 21.83 | 21.60 | 21.54 | 21.41 | 21.22 | 21.05 | 20.98 | 20.86 | 20.80 | 20.80 | 20.77 |
| 261.43  | 22.52 | 22.35 | 22.10 | 22.02 | 21.79 | 21.62 | 21.57 | 21.43 | 21.43 | 21.37 | 21.30 |
| 280.98  | 22.40 | 22.20 | 22.14 | 21.92 | 21.73 | 21.54 | 21.50 | 21.28 | 21.30 | 21.20 | 21.12 |
| 302.07  | 22.58 | 22.41 | 22.16 | 21.99 | 21.91 | 21.62 | 21.58 | 21.42 | 21.31 | 21.23 | 21.12 |
| 324.81  | 23.10 | 22.97 | 22.68 | 22.53 | 22.32 | 22.18 | 22.10 | 21.83 | 21.72 | 21.73 | 21.62 |
| 349.33  | 23.23 | 23.06 | 22.84 | 22.58 | 22.42 | 22.12 | 22.03 | 21.85 | 21.80 | 21.65 | 21.58 |
| 375.79  | 23.51 | 23.31 | 23.03 | 22.81 | 22.68 | 22.45 | 22.38 | 22.11 | 21.97 | 21.93 | 21.84 |
| 404.31  | 23.48 | 23.18 | 23.02 | 22.77 | 22.59 | 22.31 | 22.19 | 22.03 | 21.82 | 21.71 | 21.62 |
| 435.08  | 23.96 | 23.68 | 23.56 | 23.38 | 23.21 | 23.02 | 22.80 | 22.57 | 22.44 | 22.28 | 22.14 |
| 468.27  | 24.03 | 23.78 | 23.59 | 23.31 | 23.10 | 22.93 | 22.76 | 22.55 | 22.39 | 22.35 | 22.17 |
| 504.06  | 24.42 | 24.19 | 23.90 | 23.75 | 23.43 | 23.17 | 22.96 | 22.77 | 22.67 | 22.50 | 22.26 |
| 542.66  | 24.57 | 24.27 | 24.06 | 23.76 | 23.55 | 23.29 | 23.14 | 22.88 | 22.72 | 22.57 | 22.42 |
| 584.29  | 24.69 | 24.38 | 24.11 | 23.90 | 23.55 | 23.27 | 23.10 | 22.85 | 22.77 | 22.56 | 22.30 |
| 629.18  | 24.84 | 24.58 | 24.22 | 23.89 | 23.72 | 23.41 | 23.20 | 22.95 | 22.70 | 22.63 | 22.40 |
| 677.61  | 25.17 | 25.01 | 24.69 | 24.37 | 24.11 | 23.83 | 23.60 | 23.31 | 23.23 | 23.08 | 22.85 |
| 729.83  | 25.25 | 24.96 | 24.74 | 24.37 | 24.09 | 23.73 | 23.56 | 23.32 | 23.14 | 22.96 | 22.75 |
| 786.16  | 25.48 | 25.21 | 24.86 | 24.54 | 24.24 | 23.85 | 23.71 | 23.34 | 23.21 | 23.05 | 22.79 |
| 846.90  | 25.45 | 25.09 | 24.89 | 24.61 | 24.33 | 23.99 | 23.71 | 23.56 | 23.30 | 23.07 | 22.90 |
| 912.42  | 25.70 | 25.36 | 24.97 | 24.76 | 24.45 | 24.21 | 23.96 | 23.67 | 23.47 | 23.29 | 23.09 |
| 983.08  | 25.62 | 25.34 | 25.11 | 24.74 | 24.47 | 24.24 | 24.02 | 23.65 | 23.50 | 23.25 | 23.10 |
| 1059.29 | 25.80 | 25.56 | 25.22 | 24.95 | 24.60 | 24.24 | 24.10 | 23.82 | 23.52 | 23.39 | 23.08 |
| 1141.48 | 25.77 | 25.51 | 25.18 | 24.90 | 24.61 | 24.28 | 24.07 | 23.77 | 23.49 | 23.30 | 23.07 |
| 1230.13 | 25.57 | 25.26 | 24.94 | 24.71 | 24.39 | 23.98 | 23.82 | 23.46 | 23.22 | 23.03 | 22.78 |
| 1325.73 | 25.83 | 25.56 | 25.20 | 24.86 | 24.55 | 24.20 | 24.01 | 23.69 | 23.59 | 23.30 | 23.15 |
| 1428.84 | 25.74 | 25.36 | 25.04 | 24.70 | 24.48 | 24.13 | 23.89 | 23.61 | 23.39 | 23.11 | 22.91 |
| 1540.05 | 25.87 | 25.55 | 25.30 | 25.01 | 24.64 | 24.36 | 24.21 | 23.79 | 23.59 | 23.33 | 23.14 |
| 1659.99 | 25.83 | 25.51 | 25.18 | 24.93 | 24.53 | 24.31 | 24.01 | 23.75 | 23.46 | 23.26 | 22.99 |
| 1789.34 | 25.66 | 25.35 | 25.10 | 24.86 | 24.55 | 24.16 | 23.96 | 23.67 | 23.41 | 23.16 | 23.01 |
| 1928.85 | 25.69 | 25.40 | 25.11 | 24.81 | 24.47 | 24.16 | 23.93 | 23.61 | 23.37 | 23.20 | 22.95 |
| 2079.31 | 25.65 | 25.27 | 25.02 | 24.73 | 24.40 | 24.12 | 23.86 | 23.47 | 23.22 | 23.11 | 22.87 |
| 2241.59 | 25.58 | 25.25 | 24.92 | 24.63 | 24.27 | 23.92 | 23.80 | 23.40 | 23.22 | 22.99 | 22.78 |
| 2416.60 | 25.36 | 25.06 | 24.77 | 24.43 | 24.16 | 23.81 | 23.44 | 23.19 | 23.06 | 22.74 | 22.59 |
| 2605.36 | 25.34 | 24.99 | 24.77 | 24.33 | 24.05 | 23.70 | 23.47 | 23.19 | 22.94 | 22.80 | 22.50 |
| 2808.94 | 25.18 | 24.79 | 24.61 | 24.25 | 24.01 | 23.67 | 23.37 | 23.20 | 22.94 | 22.71 | 22.51 |
| 3028.50 | 25.09 | 24.76 | 24.52 | 24.12 | 23.81 | 23.48 | 23.27 | 22.98 | 22.77 | 22.54 | 22.35 |
| 3265.30 | 24.90 | 24.59 | 24.25 | 23.98 | 23.62 | 23.35 | 23.10 | 22.72 | 22.57 | 22.38 | 22.08 |
| 3520.69 | 24.52 | 24.27 | 24.00 | 23.63 | 23.33 | 23.01 | 22.81 | 22.47 | 22.36 | 22.12 | 21.86 |
| 3796.13 | 24.37 | 24.07 | 23.83 | 23.38 | 23.15 | 22.75 | 22.63 | 22.27 | 22.10 | 21.85 | 21.65 |

| Wavelength<br>(nm)<br>Time<br>(ps) | 631.72 | 633.14 | 634.56 | 635.99 | 637.41 | 638.84 | 640.26 | 641.68 | 643.11 | 644.53 | 645.96 |
|------------------------------------|--------|--------|--------|--------|--------|--------|--------|--------|--------|--------|--------|
| -3.78                              | -0.02  | -0.02  | -0.12  | -0.07  | -0.04  | -0.13  | -0.07  | -0.06  | -0.04  | -0.04  | -0.05  |
| -3.28                              | -0.04  | -0.04  | -0.06  | 0.05   | 0.00   | 0.03   | -0.08  | -0.05  | -0.04  | -0.05  | 0.00   |
| -2.78                              | -0.04  | 0.03   | 0.04   | -0.01  | -0.03  | -0.07  | 0.03   | -0.04  | -0.04  | -0.05  | -0.05  |
| -2.28                              | -0.06  | -0.07  | 0.00   | -0.03  | 0.02   | -0.01  | -0.01  | 0.00   | -0.02  | -0.03  | -0.01  |
| -1.78                              | -0.08  | -0.09  | -0.09  | -0.11  | -0.07  | -0.03  | 0.02   | -0.06  | 0.01   | 0.05   | 0.08   |
| -1.28                              | 0.06   | 0.12   | 0.07   | 0.09   | 0.09   | 0.14   | 0.04   | 0.11   | 0.10   | 0.08   | 0.10   |
| -0.78                              | 0.16   | 0.16   | 0.16   | 0.15   | 0.10   | 0.11   | 0.13   | 0.08   | 0.12   | 0.08   | 0.07   |
| -0.28                              | 0.03   | -0.09  | -0.01  | -0.06  | -0.06  | -0.03  | -0.06  | 0.02   | -0.10  | -0.04  | -0.13  |
| -0.18                              | 0.03   | -0.01  | 0.00   | 0.08   | 0.13   | 0.06   | 0.02   | 0.03   | 0.05   | 0.06   | 0.00   |
| -0.08                              | 0.06   | 0.07   | 0.07   | 0.03   | 0.09   | 0.05   | 0.06   | 0.01   | 0.12   | 0.02   | 0.11   |
| 0.02                               | 0.08   | 0.08   | 0.07   | 0.05   | 0.12   | 0.09   | 0.05   | 0.00   | 0.05   | -0.02  | 0.00   |
| 0.12                               | 0.06   | 0.10   | 0.00   | 0.14   | 0.04   | 0.13   | 0.18   | 0.15   | 0.15   | 0.12   | 0.15   |
| 0.22                               | 0.01   | -0.07  | -0.01  | -0.08  | 0.00   | -0.05  | -0.03  | 0.00   | -0.04  | -0.05  | -0.02  |
| 0.27                               | 0.13   | 0.09   | 0.12   | 0.08   | 0.15   | 0.16   | 0.12   | 0.13   | 0.15   | 0.19   | 0.16   |
| 0.32                               | -0.13  | -0.04  | -0.09  | -0.07  | -0.07  | -0.03  | -0.04  | -0.08  | -0.08  | -0.07  | -0.09  |
| 0.37                               | -0.08  | -0.01  | -0.04  | -0.01  | 0.03   | 0.02   | 0.00   | 0.05   | 0.06   | 0.10   | 0.08   |
| 0.42                               | -0.08  | -0.03  | -0.02  | -0.03  | 0.02   | -0.03  | 0.07   | 0.16   | 0.13   | 0.10   | 0.13   |
| 0.47                               | 0.09   | 0.12   | 0.16   | 0.12   | 0.09   | 0.21   | 0.16   | 0.18   | 0.20   | 0.12   | 0.12   |
| 0.52                               | 0.03   | 0.05   | 0.08   | 0.02   | 0.05   | 0.04   | 0.08   | 0.06   | -0.03  | 0.08   | -0.01  |
| 0.57                               | -0.07  | -0.11  | -0.07  | -0.15  | -0.05  | -0.05  | -0.03  | 0.01   | 0.05   | 0.03   | 0.05   |
| 0.62                               | -0.02  | -0.03  | -0.07  | -0.07  | -0.12  | -0.04  | -0.09  | -0.06  | 0.02   | 0.02   | 0.05   |
| 0.67                               | -0.07  | 0.03   | 0.09   | 0.00   | 0.03   | 0.05   | 0.06   | 0.09   | 0.04   | 0.09   | 0.09   |
| 0.72                               | 0.00   | 0.05   | 0.11   | 0.06   | 0.05   | 0.07   | 0.12   | 0.13   | 0.23   | 0.19   | 0.24   |
| 0.77                               | 0.04   | 0.04   | 0.07   | 0.08   | 0.06   | 0.03   | 0.11   | 0.15   | 0.11   | 0.08   | 0.12   |
| 0.82                               | 0.04   | 0.03   | -0.04  | 0.08   | -0.01  | 0.02   | -0.05  | 0.07   | 0.08   | -0.02  | 0.02   |
| 0.87                               | -0.03  | -0.01  | -0.06  | -0.05  | -0.02  | 0.02   | 0.02   | 0.03   | 0.05   | -0.02  | 0.08   |
| 0.92                               | 0.11   | 0.12   | 0.16   | 0.08   | 0.14   | 0.10   | 0.07   | 0.09   | 0.06   | 0.04   | 0.09   |
| 0.97                               | -0.16  | -0.13  | -0.10  | -0.02  | -0.04  | -0.02  | -0.04  | -0.01  | 0.08   | 0.02   | 0.05   |
| 1.02                               | 0.06   | 0.08   | 0.04   | 0.02   | 0.00   | 0.03   | -0.06  | -0.09  | -0.03  | -0.06  | -0.07  |
| 1.07                               | 0.10   | 0.11   | 0.03   | 0.11   | 0.13   | 0.12   | 0.08   | 0.07   | 0.04   | 0.01   | -0.03  |
| 1.12                               | 0.03   | 0.05   | 0.07   | 0.08   | 0.09   | 0.08   | -0.01  | 0.03   | 0.03   | 0.01   | 0.01   |
| 1.17                               | 0.03   | -0.02  | 0.06   | 0.10   | 0.00   | 0.03   | -0.04  | -0.05  | -0.06  | -0.08  | -0.14  |
| 1.22                               | 0.10   | 0.17   | 0.14   | -0.03  | -0.09  | -0.01  | 0.01   | 0.08   | 0.04   | 0.03   | -0.08  |
| 1.27                               | -0.14  | -0.18  | -0.19  | -0.20  | -0.07  | -0.05  | -0.07  | -0.02  | -0.12  | -0.13  | -0.15  |
| 1.32                               | 0.75   | 0.81   | 0.73   | 0.51   | 0.16   | -0.08  | -0.33  | -0.59  | -0.71  | -0.73  | -0.58  |
| 1.37                               | -9.44  | -7.85  | -7.36  | -7.20  | -7.67  | -8.67  | -10.28 | -12.21 | -14.52 | -16.86 | -18.85 |
| 1.42                               | 112.28 | 111.97 | 110.92 | 110.20 | 109.39 | 109.15 | 108.13 | 106.64 | 104.43 | 100.54 | 97.07  |
| 1.47                               | -10.54 | -12.89 | -14.83 | -15.84 | -15.76 | -14.84 | -12.92 | -9.98  | -6.15  | -1.72  | 4.21   |
| 1.52                               | 23.52  | 24.00  | 24.53  | 25.05  | 25.48  | 25.94  | 26.40  | 26.84  | 27.35  | 27.69  | 28.16  |
| 1.57                               | 19.57  | 20.23  | 20.78  | 21.24  | 21.58  | 22.00  | 22.62  | 23.29  | 23.77  | 24.00  | 24.45  |
| 1.62                               | 18.50  | 19.24  | 20.17  | 20.91  | 21.21  | 21.55  | 22.17  | 23.34  | 24.40  | 24.98  | 25.14  |
| 1.67                               | 17.70  | 18.26  | 18.77  | 19.21  | 19.76  | 20.38  | 20.86  | 21.45  | 22.06  | 22.65  | 23.34  |
| 1.72                               | 17.51  | 18.00  | 18.44  | 18.91  | 19.48  | 20.04  | 20.47  | 20.98  | 21.49  | 21.84  | 22.36  |
| 1.77                               | 17.20  | 17.71  | 18.19  | 18.68  | 19.17  | 19.80  | 20.34  | 21.05  | 21.67  | 22.24  | 23.07  |
| 1.82                               | 16.16  | 16.57  | 17.06  | 17.47  | 17.93  | 18.43  | 18.81  | 19.29  | 19.82  | 20.29  | 20.86  |

|      |       |       |       |       |       |       |       |       |       |       |       |
|------|-------|-------|-------|-------|-------|-------|-------|-------|-------|-------|-------|
| 1.87 | 17.92 | 18.38 | 18.85 | 19.28 | 19.86 | 20.43 | 20.85 | 21.36 | 21.89 | 22.36 | 22.78 |
| 1.92 | 16.45 | 16.87 | 17.35 | 17.86 | 18.33 | 18.87 | 19.46 | 19.97 | 20.65 | 21.31 | 21.98 |
| 1.97 | 16.53 | 16.94 | 17.37 | 17.81 | 18.26 | 18.70 | 19.09 | 19.56 | 19.98 | 20.38 | 20.81 |
| 2.02 | 16.49 | 16.88 | 17.28 | 17.68 | 18.14 | 18.66 | 19.16 | 19.68 | 20.21 | 20.69 | 21.27 |
| 2.07 | 16.52 | 16.93 | 17.33 | 17.82 | 18.29 | 18.75 | 19.19 | 19.79 | 20.36 | 20.89 | 21.57 |
| 2.12 | 16.31 | 16.75 | 17.13 | 17.54 | 17.93 | 18.44 | 18.83 | 19.37 | 19.76 | 20.17 | 20.65 |
| 2.17 | 15.98 | 16.43 | 16.91 | 17.34 | 17.81 | 18.37 | 18.85 | 19.40 | 20.02 | 20.61 | 21.20 |
| 2.22 | 16.19 | 16.49 | 16.86 | 17.38 | 17.74 | 18.25 | 18.70 | 19.12 | 19.56 | 20.03 | 20.54 |
| 2.27 | 17.22 | 17.64 | 18.10 | 18.50 | 19.01 | 19.45 | 19.92 | 20.39 | 20.86 | 21.29 | 21.78 |
| 2.32 | 15.90 | 16.33 | 16.74 | 17.08 | 17.54 | 17.97 | 18.40 | 18.92 | 19.50 | 19.95 | 20.59 |
| 2.37 | 16.22 | 16.52 | 17.00 | 17.31 | 17.71 | 18.24 | 18.59 | 19.02 | 19.49 | 19.93 | 20.42 |
| 2.42 | 16.39 | 16.93 | 17.22 | 17.62 | 18.02 | 18.53 | 19.02 | 19.56 | 19.98 | 20.42 | 20.92 |
| 2.47 | 16.66 | 17.00 | 17.41 | 17.84 | 18.30 | 18.74 | 19.21 | 19.74 | 20.18 | 20.73 | 21.22 |
| 2.52 | 16.37 | 16.67 | 17.05 | 17.46 | 17.86 | 18.29 | 18.73 | 19.21 | 19.63 | 20.00 | 20.52 |
| 2.57 | 16.84 | 17.24 | 17.60 | 17.97 | 18.48 | 18.90 | 19.40 | 19.89 | 20.41 | 20.92 | 21.44 |
| 2.62 | 16.36 | 16.71 | 17.19 | 17.51 | 17.96 | 18.39 | 18.74 | 19.24 | 19.67 | 20.11 | 20.66 |
| 2.67 | 16.32 | 16.74 | 17.16 | 17.47 | 17.93 | 18.26 | 18.72 | 19.10 | 19.55 | 19.92 | 20.38 |
| 2.72 | 16.30 | 16.59 | 17.04 | 17.34 | 17.73 | 18.23 | 18.65 | 19.14 | 19.68 | 20.14 | 20.77 |
| 2.77 | 16.36 | 16.75 | 17.03 | 17.36 | 17.83 | 18.22 | 18.64 | 19.08 | 19.45 | 19.89 | 20.34 |
| 2.82 | 16.18 | 16.53 | 16.92 | 17.24 | 17.65 | 18.08 | 18.55 | 18.97 | 19.30 | 19.71 | 20.16 |
| 2.87 | 16.25 | 16.66 | 17.04 | 17.36 | 17.73 | 18.18 | 18.67 | 19.03 | 19.47 | 19.99 | 20.48 |
| 2.92 | 16.48 | 16.76 | 17.20 | 17.46 | 17.91 | 18.23 | 18.66 | 19.07 | 19.40 | 19.78 | 20.27 |
| 2.97 | 16.26 | 16.57 | 16.93 | 17.26 | 17.66 | 18.14 | 18.50 | 18.94 | 19.35 | 19.69 | 20.26 |
| 3.02 | 16.62 | 16.94 | 17.31 | 17.68 | 18.08 | 18.50 | 18.85 | 19.36 | 19.80 | 20.22 | 20.74 |
| 3.07 | 16.23 | 16.57 | 16.89 | 17.28 | 17.66 | 18.05 | 18.42 | 18.89 | 19.18 | 19.57 | 20.05 |
| 3.12 | 16.16 | 16.46 | 16.77 | 17.16 | 17.49 | 17.98 | 18.39 | 18.88 | 19.34 | 19.73 | 20.29 |
| 3.17 | 16.54 | 16.77 | 17.06 | 17.40 | 17.74 | 18.13 | 18.49 | 18.82 | 19.26 | 19.55 | 19.97 |
| 3.22 | 16.69 | 17.04 | 17.36 | 17.72 | 18.12 | 18.47 | 18.95 | 19.33 | 19.76 | 20.25 | 20.66 |
| 3.42 | 16.76 | 17.02 | 17.35 | 17.69 | 18.00 | 18.40 | 18.86 | 19.20 | 19.52 | 19.95 | 20.32 |
| 3.62 | 17.24 | 17.64 | 17.94 | 18.24 | 18.60 | 18.95 | 19.41 | 19.74 | 20.19 | 20.55 | 20.98 |
| 3.82 | 16.56 | 16.85 | 17.13 | 17.55 | 17.84 | 18.23 | 18.64 | 19.05 | 19.52 | 19.83 | 20.31 |
| 4.02 | 17.38 | 17.70 | 18.00 | 18.28 | 18.66 | 19.06 | 19.44 | 19.79 | 20.14 | 20.55 | 21.00 |
| 4.22 | 16.61 | 16.95 | 17.30 | 17.53 | 17.89 | 18.29 | 18.63 | 18.99 | 19.40 | 19.72 | 20.20 |
| 4.42 | 16.80 | 17.08 | 17.38 | 17.71 | 18.09 | 18.52 | 18.88 | 19.22 | 19.67 | 20.06 | 20.39 |
| 4.62 | 17.25 | 17.47 | 17.74 | 18.07 | 18.39 | 18.69 | 18.99 | 19.33 | 19.68 | 20.09 | 20.43 |
| 4.82 | 16.93 | 17.26 | 17.61 | 17.96 | 18.30 | 18.65 | 19.01 | 19.41 | 19.77 | 20.16 | 20.51 |
| 5.02 | 17.13 | 17.50 | 17.73 | 18.08 | 18.39 | 18.71 | 19.02 | 19.37 | 19.70 | 20.13 | 20.48 |
| 5.22 | 17.22 | 17.43 | 17.75 | 18.15 | 18.41 | 18.81 | 19.15 | 19.50 | 19.93 | 20.30 | 20.60 |
| 5.42 | 17.32 | 17.53 | 17.84 | 18.19 | 18.47 | 18.84 | 19.20 | 19.53 | 19.88 | 20.24 | 20.60 |
| 5.62 | 17.33 | 17.62 | 17.93 | 18.20 | 18.61 | 18.96 | 19.27 | 19.58 | 19.93 | 20.32 | 20.71 |
| 5.82 | 17.25 | 17.54 | 17.79 | 18.04 | 18.46 | 18.79 | 19.08 | 19.44 | 19.85 | 20.26 | 20.61 |
| 6.02 | 17.15 | 17.47 | 17.70 | 18.03 | 18.30 | 18.74 | 19.00 | 19.37 | 19.76 | 20.02 | 20.41 |
| 6.22 | 17.02 | 17.29 | 17.60 | 17.95 | 18.28 | 18.56 | 18.94 | 19.28 | 19.64 | 20.01 | 20.37 |
| 6.42 | 17.23 | 17.51 | 17.80 | 18.09 | 18.44 | 18.77 | 19.07 | 19.37 | 19.73 | 20.15 | 20.50 |
| 6.62 | 17.51 | 17.79 | 18.12 | 18.39 | 18.62 | 19.02 | 19.35 | 19.75 | 20.08 | 20.43 | 20.84 |
| 6.82 | 17.23 | 17.49 | 17.80 | 18.00 | 18.40 | 18.70 | 18.98 | 19.37 | 19.73 | 19.99 | 20.41 |
| 7.02 | 17.68 | 18.08 | 18.30 | 18.59 | 18.95 | 19.25 | 19.60 | 19.96 | 20.31 | 20.66 | 21.00 |
| 7.22 | 17.19 | 17.45 | 17.76 | 18.05 | 18.37 | 18.65 | 19.01 | 19.36 | 19.75 | 20.08 | 20.44 |
| 7.42 | 17.66 | 18.04 | 18.27 | 18.57 | 18.89 | 19.22 | 19.64 | 19.95 | 20.35 | 20.70 | 21.07 |
| 7.62 | 17.36 | 17.64 | 17.89 | 18.23 | 18.53 | 18.88 | 19.13 | 19.56 | 19.95 | 20.23 | 20.51 |

|       |       |       |       |       |       |       |       |       |       |       |       |
|-------|-------|-------|-------|-------|-------|-------|-------|-------|-------|-------|-------|
| 7.82  | 17.48 | 17.81 | 18.10 | 18.34 | 18.67 | 19.01 | 19.32 | 19.70 | 19.99 | 20.29 | 20.72 |
| 8.02  | 17.20 | 17.43 | 17.78 | 18.00 | 18.29 | 18.58 | 18.92 | 19.19 | 19.62 | 19.88 | 20.28 |
| 8.22  | 17.38 | 17.71 | 17.95 | 18.20 | 18.60 | 18.93 | 19.36 | 19.63 | 20.01 | 20.33 | 20.70 |
| 8.42  | 16.80 | 17.18 | 17.40 | 17.77 | 18.04 | 18.44 | 18.69 | 19.08 | 19.43 | 19.80 | 20.22 |
| 8.62  | 17.34 | 17.60 | 17.98 | 18.20 | 18.56 | 18.88 | 19.15 | 19.45 | 19.84 | 20.14 | 20.55 |
| 8.82  | 17.46 | 17.74 | 17.98 | 18.24 | 18.60 | 18.88 | 19.21 | 19.56 | 19.86 | 20.20 | 20.55 |
| 9.02  | 16.97 | 17.33 | 17.61 | 17.87 | 18.18 | 18.54 | 18.82 | 19.14 | 19.44 | 19.89 | 20.25 |
| 9.22  | 17.24 | 17.51 | 17.83 | 18.06 | 18.35 | 18.71 | 19.05 | 19.41 | 19.75 | 20.08 | 20.46 |
| 9.42  | 17.45 | 17.78 | 18.05 | 18.26 | 18.61 | 18.86 | 19.12 | 19.57 | 19.86 | 20.18 | 20.54 |
| 9.62  | 17.17 | 17.41 | 17.67 | 18.00 | 18.26 | 18.72 | 18.94 | 19.34 | 19.71 | 20.03 | 20.37 |
| 9.82  | 17.33 | 17.64 | 17.86 | 18.20 | 18.49 | 18.84 | 19.20 | 19.56 | 19.85 | 20.25 | 20.63 |
| 10.02 | 17.22 | 17.47 | 17.84 | 18.10 | 18.29 | 18.62 | 18.89 | 19.22 | 19.51 | 19.86 | 20.25 |
| 10.22 | 17.37 | 17.66 | 17.87 | 18.20 | 18.43 | 18.77 | 19.07 | 19.42 | 19.75 | 20.01 | 20.44 |
| 10.42 | 17.44 | 17.74 | 18.01 | 18.30 | 18.56 | 18.96 | 19.31 | 19.64 | 20.00 | 20.29 | 20.73 |
| 10.62 | 17.27 | 17.56 | 17.86 | 18.12 | 18.39 | 18.74 | 19.10 | 19.48 | 19.79 | 20.09 | 20.46 |
| 10.82 | 16.99 | 17.26 | 17.43 | 17.80 | 18.08 | 18.51 | 18.78 | 19.12 | 19.46 | 19.86 | 20.27 |
| 11.02 | 17.23 | 17.55 | 17.70 | 17.99 | 18.36 | 18.69 | 18.95 | 19.29 | 19.69 | 20.00 | 20.42 |
| 11.22 | 17.06 | 17.34 | 17.59 | 17.85 | 18.20 | 18.49 | 18.68 | 19.14 | 19.51 | 19.75 | 20.14 |
| 11.42 | 16.63 | 16.94 | 17.17 | 17.46 | 17.70 | 18.10 | 18.33 | 18.69 | 19.02 | 19.34 | 19.74 |
| 11.62 | 17.32 | 17.59 | 17.89 | 18.25 | 18.48 | 18.82 | 19.26 | 19.58 | 19.94 | 20.27 | 20.67 |
| 11.82 | 17.15 | 17.37 | 17.67 | 17.96 | 18.22 | 18.60 | 18.85 | 19.17 | 19.55 | 19.88 | 20.22 |
| 12.02 | 17.11 | 17.30 | 17.57 | 17.84 | 18.13 | 18.53 | 18.91 | 19.28 | 19.61 | 19.90 | 20.35 |
| 12.22 | 17.32 | 17.57 | 17.87 | 18.11 | 18.49 | 18.76 | 19.13 | 19.49 | 19.83 | 20.19 | 20.59 |
| 12.42 | 16.86 | 17.24 | 17.50 | 17.74 | 18.02 | 18.37 | 18.71 | 18.93 | 19.36 | 19.69 | 20.01 |
| 12.62 | 16.87 | 17.15 | 17.36 | 17.70 | 17.94 | 18.27 | 18.61 | 18.89 | 19.27 | 19.61 | 19.90 |
| 12.82 | 17.08 | 17.36 | 17.55 | 17.85 | 18.15 | 18.43 | 18.70 | 19.03 | 19.38 | 19.69 | 20.06 |
| 13.02 | 17.06 | 17.34 | 17.59 | 17.81 | 18.12 | 18.49 | 18.78 | 19.18 | 19.45 | 19.91 | 20.32 |
| 13.22 | 17.21 | 17.48 | 17.74 | 18.00 | 18.34 | 18.71 | 19.01 | 19.30 | 19.65 | 20.02 | 20.43 |
| 13.42 | 17.04 | 17.33 | 17.63 | 17.88 | 18.28 | 18.57 | 18.89 | 19.23 | 19.63 | 19.93 | 20.30 |
| 13.50 | 17.00 | 17.23 | 17.48 | 17.76 | 18.08 | 18.39 | 18.68 | 19.04 | 19.37 | 19.71 | 20.01 |
| 13.59 | 17.14 | 17.41 | 17.63 | 17.94 | 18.25 | 18.56 | 18.82 | 19.29 | 19.59 | 19.87 | 20.34 |
| 13.68 | 17.15 | 17.47 | 17.62 | 17.94 | 18.26 | 18.55 | 18.91 | 19.23 | 19.54 | 19.77 | 20.19 |
| 13.78 | 16.68 | 16.96 | 17.26 | 17.49 | 17.81 | 18.17 | 18.42 | 18.85 | 19.13 | 19.47 | 19.83 |
| 13.88 | 16.98 | 17.27 | 17.51 | 17.80 | 18.10 | 18.48 | 18.76 | 19.21 | 19.41 | 19.81 | 20.12 |
| 14.00 | 17.32 | 17.57 | 17.78 | 18.13 | 18.40 | 18.78 | 19.05 | 19.44 | 19.75 | 20.08 | 20.48 |
| 14.12 | 17.13 | 17.32 | 17.60 | 17.88 | 18.18 | 18.59 | 18.75 | 19.17 | 19.53 | 19.87 | 20.15 |
| 14.25 | 17.08 | 17.36 | 17.53 | 17.91 | 18.17 | 18.55 | 18.82 | 19.17 | 19.48 | 19.87 | 20.22 |
| 14.40 | 17.35 | 17.65 | 17.91 | 18.25 | 18.54 | 18.81 | 19.13 | 19.50 | 19.87 | 20.25 | 20.53 |
| 14.55 | 16.88 | 17.12 | 17.36 | 17.74 | 17.97 | 18.28 | 18.57 | 18.97 | 19.32 | 19.61 | 19.97 |
| 14.72 | 16.84 | 17.17 | 17.40 | 17.70 | 18.01 | 18.32 | 18.65 | 18.96 | 19.32 | 19.61 | 20.02 |
| 14.90 | 16.81 | 17.00 | 17.29 | 17.58 | 17.84 | 18.26 | 18.50 | 18.87 | 19.13 | 19.46 | 19.91 |
| 15.09 | 16.74 | 17.04 | 17.23 | 17.55 | 17.87 | 18.19 | 18.48 | 18.79 | 19.11 | 19.42 | 19.77 |
| 15.30 | 17.16 | 17.42 | 17.65 | 17.96 | 18.31 | 18.60 | 18.89 | 19.23 | 19.56 | 19.89 | 20.27 |
| 15.53 | 17.49 | 17.69 | 17.95 | 18.30 | 18.54 | 18.92 | 19.20 | 19.52 | 19.91 | 20.19 | 20.56 |
| 15.77 | 17.19 | 17.49 | 17.68 | 18.02 | 18.33 | 18.62 | 18.91 | 19.36 | 19.72 | 19.99 | 20.44 |
| 16.04 | 17.12 | 17.38 | 17.69 | 17.93 | 18.29 | 18.56 | 18.88 | 19.36 | 19.59 | 20.00 | 20.33 |
| 16.32 | 17.17 | 17.36 | 17.72 | 17.97 | 18.28 | 18.54 | 18.89 | 19.18 | 19.53 | 19.90 | 20.29 |
| 16.63 | 17.20 | 17.49 | 17.67 | 18.00 | 18.33 | 18.66 | 18.90 | 19.27 | 19.67 | 19.93 | 20.37 |
| 16.96 | 17.60 | 17.92 | 18.14 | 18.41 | 18.77 | 19.07 | 19.33 | 19.66 | 19.97 | 20.26 | 20.65 |
| 17.31 | 17.06 | 17.30 | 17.57 | 17.87 | 18.16 | 18.48 | 18.82 | 19.15 | 19.48 | 19.85 | 20.18 |

|        |       |       |       |       |       |       |       |       |       |       |       |
|--------|-------|-------|-------|-------|-------|-------|-------|-------|-------|-------|-------|
| 17.70  | 17.55 | 17.84 | 18.05 | 18.39 | 18.70 | 19.04 | 19.33 | 19.63 | 20.01 | 20.39 | 20.69 |
| 18.11  | 16.73 | 16.99 | 17.26 | 17.56 | 17.86 | 18.19 | 18.46 | 18.83 | 19.15 | 19.48 | 19.81 |
| 18.56  | 16.98 | 17.22 | 17.51 | 17.75 | 18.09 | 18.43 | 18.69 | 19.03 | 19.45 | 19.81 | 20.15 |
| 19.04  | 17.08 | 17.44 | 17.56 | 17.88 | 18.18 | 18.48 | 18.78 | 19.19 | 19.50 | 19.75 | 20.12 |
| 19.56  | 17.33 | 17.58 | 17.81 | 18.22 | 18.46 | 18.76 | 19.14 | 19.45 | 19.82 | 20.11 | 20.59 |
| 20.12  | 17.28 | 17.52 | 17.82 | 18.05 | 18.34 | 18.68 | 18.96 | 19.36 | 19.67 | 19.97 | 20.40 |
| 20.72  | 17.38 | 17.59 | 17.89 | 18.19 | 18.49 | 18.83 | 19.11 | 19.53 | 19.79 | 20.19 | 20.60 |
| 21.37  | 17.46 | 17.62 | 17.96 | 18.27 | 18.47 | 18.80 | 19.12 | 19.44 | 19.76 | 20.05 | 20.49 |
| 22.08  | 17.26 | 17.52 | 17.81 | 18.10 | 18.43 | 18.76 | 19.08 | 19.49 | 19.84 | 20.23 | 20.65 |
| 22.84  | 17.68 | 18.05 | 18.28 | 18.58 | 18.84 | 19.17 | 19.48 | 19.91 | 20.17 | 20.51 | 20.91 |
| 23.65  | 16.94 | 17.24 | 17.52 | 17.78 | 18.17 | 18.45 | 18.72 | 19.06 | 19.43 | 19.76 | 20.16 |
| 24.54  | 17.47 | 17.73 | 18.00 | 18.23 | 18.49 | 18.82 | 19.01 | 19.47 | 19.72 | 20.03 | 20.41 |
| 25.49  | 17.65 | 17.98 | 18.15 | 18.41 | 18.75 | 19.06 | 19.36 | 19.70 | 19.95 | 20.40 | 20.77 |
| 26.51  | 17.17 | 17.44 | 17.70 | 17.89 | 18.19 | 18.47 | 18.76 | 19.14 | 19.42 | 19.74 | 20.01 |
| 27.62  | 17.75 | 17.96 | 18.20 | 18.45 | 18.75 | 19.09 | 19.35 | 19.69 | 19.94 | 20.25 | 20.64 |
| 28.81  | 17.63 | 17.89 | 18.20 | 18.45 | 18.74 | 19.07 | 19.39 | 19.73 | 20.02 | 20.31 | 20.67 |
| 30.10  | 17.19 | 17.42 | 17.68 | 17.85 | 18.20 | 18.46 | 18.71 | 19.11 | 19.37 | 19.71 | 20.02 |
| 31.49  | 17.67 | 18.00 | 18.17 | 18.45 | 18.77 | 19.10 | 19.33 | 19.69 | 20.06 | 20.31 | 20.69 |
| 32.98  | 17.38 | 17.60 | 17.83 | 18.08 | 18.45 | 18.72 | 19.08 | 19.27 | 19.60 | 19.93 | 20.35 |
| 34.60  | 17.90 | 18.17 | 18.39 | 18.61 | 18.85 | 19.19 | 19.40 | 19.73 | 20.00 | 20.39 | 20.65 |
| 36.34  | 17.65 | 17.89 | 18.17 | 18.39 | 18.69 | 19.01 | 19.21 | 19.50 | 19.79 | 20.11 | 20.43 |
| 38.21  | 18.19 | 18.42 | 18.70 | 18.91 | 19.18 | 19.49 | 19.74 | 20.01 | 20.33 | 20.57 | 20.89 |
| 40.24  | 17.83 | 18.11 | 18.30 | 18.48 | 18.85 | 19.14 | 19.43 | 19.73 | 20.02 | 20.25 | 20.69 |
| 42.42  | 17.43 | 17.70 | 17.87 | 18.16 | 18.40 | 18.69 | 18.98 | 19.28 | 19.53 | 19.84 | 20.14 |
| 44.78  | 17.76 | 17.96 | 18.13 | 18.41 | 18.63 | 18.99 | 19.23 | 19.46 | 19.75 | 20.08 | 20.38 |
| 47.32  | 17.65 | 17.80 | 18.06 | 18.34 | 18.62 | 18.90 | 19.15 | 19.42 | 19.77 | 20.08 | 20.37 |
| 50.06  | 17.85 | 18.07 | 18.29 | 18.47 | 18.74 | 19.09 | 19.31 | 19.62 | 19.94 | 20.28 | 20.55 |
| 53.01  | 18.04 | 18.25 | 18.48 | 18.77 | 19.04 | 19.26 | 19.48 | 19.77 | 20.09 | 20.29 | 20.62 |
| 56.20  | 18.03 | 18.20 | 18.40 | 18.70 | 18.89 | 19.12 | 19.46 | 19.65 | 19.99 | 20.23 | 20.49 |
| 59.64  | 18.57 | 18.75 | 18.92 | 19.18 | 19.42 | 19.66 | 19.83 | 20.16 | 20.39 | 20.59 | 20.90 |
| 63.34  | 17.73 | 18.03 | 18.17 | 18.43 | 18.66 | 18.89 | 19.20 | 19.42 | 19.69 | 19.90 | 20.26 |
| 67.34  | 18.04 | 18.32 | 18.45 | 18.65 | 18.86 | 19.15 | 19.32 | 19.62 | 19.87 | 20.16 | 20.42 |
| 71.65  | 18.59 | 18.81 | 18.94 | 19.15 | 19.39 | 19.59 | 19.81 | 20.06 | 20.27 | 20.52 | 20.82 |
| 76.30  | 18.44 | 18.61 | 18.74 | 18.92 | 19.23 | 19.49 | 19.70 | 19.96 | 20.18 | 20.40 | 20.67 |
| 81.32  | 18.77 | 18.92 | 19.11 | 19.30 | 19.50 | 19.73 | 19.92 | 20.25 | 20.43 | 20.69 | 20.98 |
| 86.73  | 18.95 | 19.05 | 19.17 | 19.35 | 19.63 | 19.76 | 20.03 | 20.21 | 20.43 | 20.65 | 20.95 |
| 92.56  | 19.08 | 19.31 | 19.43 | 19.56 | 19.80 | 20.03 | 20.19 | 20.44 | 20.67 | 20.96 | 21.15 |
| 98.85  | 18.64 | 18.73 | 18.95 | 19.05 | 19.31 | 19.49 | 19.65 | 19.90 | 20.10 | 20.34 | 20.58 |
| 105.64 | 19.31 | 19.53 | 19.66 | 19.82 | 20.02 | 20.22 | 20.41 | 20.66 | 20.82 | 21.06 | 21.35 |
| 112.96 | 19.34 | 19.54 | 19.74 | 19.84 | 20.01 | 20.19 | 20.32 | 20.57 | 20.84 | 20.97 | 21.19 |
| 120.85 | 19.31 | 19.44 | 19.56 | 19.69 | 19.82 | 20.05 | 20.18 | 20.36 | 20.51 | 20.76 | 21.05 |
| 129.36 | 19.82 | 19.81 | 19.99 | 20.14 | 20.30 | 20.53 | 20.66 | 20.90 | 21.16 | 21.24 | 21.54 |
| 138.55 | 19.68 | 19.73 | 19.80 | 19.95 | 20.13 | 20.22 | 20.44 | 20.64 | 20.84 | 21.06 | 21.26 |
| 148.45 | 19.48 | 19.57 | 19.63 | 19.77 | 19.90 | 20.11 | 20.26 | 20.45 | 20.64 | 20.84 | 21.07 |
| 159.13 | 19.91 | 19.94 | 20.05 | 20.21 | 20.35 | 20.45 | 20.68 | 20.80 | 21.01 | 21.17 | 21.36 |
| 170.65 | 20.11 | 20.26 | 20.31 | 20.32 | 20.51 | 20.60 | 20.74 | 20.89 | 21.03 | 21.12 | 21.33 |
| 183.07 | 20.33 | 20.40 | 20.48 | 20.61 | 20.72 | 20.90 | 20.94 | 21.05 | 21.18 | 21.33 | 21.51 |
| 196.47 | 20.35 | 20.34 | 20.36 | 20.47 | 20.47 | 20.74 | 20.79 | 21.01 | 21.11 | 21.21 | 21.36 |
| 210.91 | 20.66 | 20.71 | 20.74 | 20.78 | 20.87 | 21.04 | 21.13 | 21.18 | 21.28 | 21.42 | 21.55 |
| 226.50 | 20.52 | 20.66 | 20.61 | 20.72 | 20.80 | 20.91 | 20.94 | 21.11 | 21.17 | 21.38 | 21.45 |



|         |       |       |       |       |       |       |       |       |       |       |       |
|---------|-------|-------|-------|-------|-------|-------|-------|-------|-------|-------|-------|
| 243.31  | 20.70 | 20.77 | 20.80 | 20.87 | 20.97 | 21.05 | 21.14 | 21.20 | 21.34 | 21.44 | 21.58 |
| 261.43  | 21.31 | 21.26 | 21.27 | 21.31 | 21.39 | 21.44 | 21.57 | 21.56 | 21.78 | 21.71 | 21.91 |
| 280.98  | 21.13 | 21.08 | 21.09 | 21.15 | 21.19 | 21.26 | 21.33 | 21.39 | 21.48 | 21.67 | 21.71 |
| 302.07  | 21.15 | 21.11 | 21.12 | 21.15 | 21.18 | 21.25 | 21.21 | 21.31 | 21.44 | 21.44 | 21.49 |
| 324.81  | 21.55 | 21.54 | 21.54 | 21.48 | 21.54 | 21.54 | 21.51 | 21.56 | 21.62 | 21.63 | 21.72 |
| 349.33  | 21.52 | 21.50 | 21.41 | 21.47 | 21.39 | 21.38 | 21.43 | 21.52 | 21.55 | 21.59 | 21.57 |
| 375.79  | 21.70 | 21.71 | 21.67 | 21.63 | 21.63 | 21.70 | 21.70 | 21.71 | 21.77 | 21.78 | 21.88 |
| 404.31  | 21.53 | 21.43 | 21.40 | 21.41 | 21.34 | 21.34 | 21.36 | 21.41 | 21.42 | 21.44 | 21.58 |
| 435.08  | 22.04 | 22.04 | 21.93 | 21.95 | 21.87 | 21.86 | 21.86 | 21.88 | 21.83 | 21.89 | 21.86 |
| 468.27  | 22.04 | 22.02 | 21.92 | 21.88 | 21.86 | 21.90 | 21.86 | 21.88 | 21.92 | 21.86 | 21.99 |
| 504.06  | 22.19 | 22.15 | 22.12 | 22.06 | 21.96 | 21.94 | 21.92 | 21.91 | 21.93 | 21.88 | 21.92 |
| 542.66  | 22.30 | 22.26 | 22.18 | 22.11 | 22.03 | 22.05 | 22.02 | 21.96 | 21.93 | 21.88 | 21.89 |
| 584.29  | 22.11 | 22.09 | 22.03 | 21.93 | 21.92 | 21.88 | 21.84 | 21.82 | 21.84 | 21.74 | 21.82 |
| 629.18  | 22.28 | 22.23 | 22.12 | 22.01 | 21.94 | 21.94 | 21.96 | 21.94 | 21.94 | 21.90 | 21.89 |
| 677.61  | 22.69 | 22.51 | 22.48 | 22.39 | 22.30 | 22.32 | 22.23 | 22.25 | 22.21 | 22.17 | 22.15 |
| 729.83  | 22.55 | 22.39 | 22.32 | 22.20 | 22.08 | 22.07 | 21.92 | 21.87 | 21.79 | 21.79 | 21.70 |
| 786.16  | 22.65 | 22.53 | 22.36 | 22.34 | 22.18 | 22.14 | 22.04 | 22.05 | 21.97 | 21.90 | 21.89 |
| 846.90  | 22.69 | 22.58 | 22.47 | 22.32 | 22.31 | 22.17 | 22.08 | 21.95 | 21.88 | 21.92 | 21.82 |
| 912.42  | 22.84 | 22.72 | 22.55 | 22.49 | 22.28 | 22.28 | 22.06 | 22.03 | 21.90 | 21.85 | 21.76 |
| 983.08  | 22.85 | 22.75 | 22.57 | 22.52 | 22.36 | 22.27 | 22.21 | 22.06 | 22.11 | 22.04 | 21.91 |
| 1059.29 | 22.90 | 22.74 | 22.67 | 22.60 | 22.40 | 22.27 | 22.21 | 22.09 | 22.03 | 21.92 | 21.96 |
| 1141.48 | 22.89 | 22.74 | 22.60 | 22.39 | 22.27 | 22.18 | 22.11 | 21.95 | 21.91 | 21.81 | 21.70 |
| 1230.13 | 22.62 | 22.53 | 22.31 | 22.17 | 22.06 | 21.99 | 21.91 | 21.80 | 21.77 | 21.64 | 21.62 |
| 1325.73 | 22.94 | 22.81 | 22.69 | 22.55 | 22.46 | 22.39 | 22.25 | 22.17 | 22.15 | 22.04 | 21.98 |
| 1428.84 | 22.66 | 22.54 | 22.43 | 22.30 | 22.18 | 22.03 | 21.90 | 21.91 | 21.75 | 21.68 | 21.61 |
| 1540.05 | 22.93 | 22.83 | 22.63 | 22.58 | 22.45 | 22.35 | 22.18 | 22.11 | 22.05 | 21.94 | 21.91 |
| 1659.99 | 22.78 | 22.57 | 22.46 | 22.31 | 22.18 | 22.10 | 21.96 | 21.85 | 21.76 | 21.66 | 21.67 |
| 1789.34 | 22.77 | 22.66 | 22.54 | 22.39 | 22.21 | 22.11 | 22.01 | 21.92 | 21.74 | 21.60 | 21.54 |
| 1928.85 | 22.77 | 22.64 | 22.49 | 22.30 | 22.24 | 22.00 | 21.98 | 21.82 | 21.74 | 21.59 | 21.52 |
| 2079.31 | 22.69 | 22.53 | 22.27 | 22.19 | 22.04 | 21.93 | 21.81 | 21.72 | 21.59 | 21.52 | 21.50 |
| 2241.59 | 22.55 | 22.43 | 22.25 | 22.02 | 21.99 | 21.87 | 21.75 | 21.57 | 21.51 | 21.41 | 21.36 |
| 2416.60 | 22.35 | 22.19 | 22.08 | 21.96 | 21.84 | 21.72 | 21.67 | 21.55 | 21.45 | 21.40 | 21.32 |
| 2605.36 | 22.27 | 22.19 | 22.03 | 21.86 | 21.72 | 21.57 | 21.54 | 21.42 | 21.35 | 21.20 | 21.11 |
| 2808.94 | 22.31 | 22.13 | 22.02 | 21.86 | 21.73 | 21.54 | 21.46 | 21.40 | 21.23 | 21.11 | 21.09 |
| 3028.50 | 22.18 | 21.95 | 21.86 | 21.66 | 21.54 | 21.39 | 21.30 | 21.10 | 21.09 | 20.88 | 20.80 |
| 3265.30 | 21.83 | 21.80 | 21.68 | 21.52 | 21.43 | 21.32 | 21.16 | 21.12 | 20.99 | 20.92 | 20.82 |
| 3520.69 | 21.73 | 21.60 | 21.40 | 21.29 | 21.17 | 21.12 | 21.02 | 20.94 | 20.85 | 20.79 | 20.72 |
| 3796.13 | 21.47 | 21.30 | 21.17 | 21.07 | 20.92 | 20.83 | 20.68 | 20.63 | 20.49 | 20.49 | 20.34 |

| Wavelength (nm) / Time (ps) | 647.38 | 648.80 | 650.23 | 651.65 | 653.08 | 654.50 | 655.93 | 657.35 | 658.77 | 660.20 | 661.62 |
|-----------------------------|--------|--------|--------|--------|--------|--------|--------|--------|--------|--------|--------|
| -3.78                       | -0.08  | -0.03  | -0.05  | -0.05  | -0.03  | -0.06  | -0.05  | 0.01   | -0.02  | 0.00   | 0.00   |
| -3.28                       | -0.01  | 0.03   | 0.01   | -0.01  | -0.01  | 0.03   | -0.02  | -0.02  | -0.06  | -0.04  | -0.06  |
| -2.78                       | -0.04  | -0.12  | -0.13  | -0.10  | -0.08  | -0.06  | -0.14  | -0.11  | -0.08  | -0.11  | -0.07  |
| -2.28                       | -0.02  | -0.04  | -0.02  | -0.04  | -0.01  | -0.01  | -0.06  | -0.04  | 0.07   | -0.02  | 0.04   |
| -1.78                       | 0.04   | 0.07   | 0.07   | 0.11   | 0.18   | 0.11   | 0.18   | 0.21   | 0.25   | 0.13   | 0.18   |
| -1.28                       | 0.09   | 0.13   | 0.10   | 0.11   | 0.07   | 0.07   | 0.13   | 0.18   | 0.06   | 0.17   | 0.12   |
| -0.78                       | 0.05   | 0.02   | -0.01  | -0.03  | -0.06  | -0.08  | -0.09  | -0.24  | -0.17  | -0.16  | -0.22  |

|       |        |        |        |        |        |        |        |        |        |        |       |
|-------|--------|--------|--------|--------|--------|--------|--------|--------|--------|--------|-------|
| -0.28 | -0.03  | -0.06  | 0.03   | 0.01   | -0.06  | 0.01   | 0.04   | 0.00   | -0.05  | 0.03   | 0.01  |
| -0.18 | 0.08   | -0.04  | 0.17   | -0.02  | -0.04  | -0.02  | 0.04   | 0.08   | 0.02   | 0.01   | 0.00  |
| -0.08 | 0.16   | 0.10   | 0.03   | 0.04   | 0.10   | 0.07   | 0.10   | 0.03   | 0.09   | 0.00   | 0.00  |
| 0.02  | 0.07   | 0.02   | -0.08  | 0.00   | -0.04  | -0.04  | -0.09  | -0.03  | -0.14  | -0.13  | -0.15 |
| 0.12  | 0.12   | 0.19   | 0.18   | 0.20   | 0.19   | 0.23   | 0.22   | 0.29   | 0.21   | 0.17   | 0.21  |
| 0.22  | -0.04  | -0.06  | -0.09  | -0.08  | -0.10  | -0.11  | -0.07  | -0.09  | -0.14  | -0.13  | -0.05 |
| 0.27  | 0.26   | 0.17   | 0.20   | 0.23   | 0.24   | 0.14   | 0.27   | 0.24   | 0.19   | 0.22   | 0.15  |
| 0.32  | -0.03  | -0.12  | -0.03  | 0.01   | -0.11  | -0.11  | 0.00   | 0.02   | -0.02  | -0.04  | -0.09 |
| 0.37  | 0.14   | 0.13   | 0.15   | 0.22   | 0.13   | 0.24   | 0.21   | 0.30   | 0.23   | 0.31   | 0.25  |
| 0.42  | 0.20   | 0.16   | 0.26   | 0.26   | 0.25   | 0.27   | 0.28   | 0.22   | 0.25   | 0.30   | 0.20  |
| 0.47  | 0.23   | 0.16   | 0.24   | 0.24   | 0.20   | 0.18   | 0.30   | 0.23   | 0.26   | 0.20   | 0.26  |
| 0.52  | 0.04   | 0.02   | 0.05   | 0.01   | 0.02   | 0.09   | 0.04   | 0.07   | 0.10   | 0.08   | 0.02  |
| 0.57  | 0.11   | 0.17   | 0.15   | 0.15   | 0.16   | 0.11   | 0.22   | 0.31   | 0.27   | 0.23   | 0.26  |
| 0.62  | 0.05   | -0.02  | 0.05   | 0.07   | -0.03  | 0.04   | 0.10   | 0.12   | 0.07   | 0.03   | 0.08  |
| 0.67  | 0.11   | 0.06   | 0.08   | 0.09   | 0.06   | 0.11   | 0.08   | 0.18   | 0.11   | 0.13   | 0.06  |
| 0.72  | 0.26   | 0.31   | 0.30   | 0.35   | 0.32   | 0.34   | 0.44   | 0.43   | 0.39   | 0.39   | 0.40  |
| 0.77  | 0.13   | 0.13   | 0.17   | 0.14   | 0.19   | 0.18   | 0.24   | 0.19   | 0.14   | 0.17   | 0.13  |
| 0.82  | 0.04   | 0.00   | -0.01  | 0.00   | -0.05  | -0.03  | -0.03  | 0.05   | -0.02  | -0.09  | -0.11 |
| 0.87  | 0.08   | 0.07   | 0.06   | 0.09   | 0.13   | 0.08   | 0.11   | 0.13   | 0.11   | 0.09   | 0.12  |
| 0.92  | 0.05   | 0.01   | 0.06   | 0.01   | -0.03  | -0.05  | -0.03  | -0.13  | -0.14  | -0.24  | -0.25 |
| 0.97  | 0.08   | 0.23   | 0.22   | 0.16   | 0.16   | 0.23   | 0.21   | 0.33   | 0.32   | 0.33   | 0.33  |
| 1.02  | -0.03  | -0.09  | -0.06  | -0.11  | -0.15  | -0.07  | -0.05  | -0.16  | -0.14  | -0.15  | -0.16 |
| 1.07  | 0.05   | 0.03   | 0.01   | 0.02   | -0.05  | -0.09  | -0.11  | -0.12  | -0.05  | -0.12  | -0.11 |
| 1.12  | -0.01  | -0.06  | -0.03  | 0.02   | 0.05   | -0.04  | 0.01   | -0.02  | 0.04   | -0.01  | 0.03  |
| 1.17  | -0.17  | -0.14  | -0.24  | -0.26  | -0.30  | -0.38  | -0.44  | -0.40  | -0.48  | -0.50  | -0.56 |
| 1.22  | -0.06  | -0.11  | 0.05   | 0.06   | -0.03  | -0.14  | -0.12  | -0.14  | -0.14  | -0.10  | -0.11 |
| 1.27  | -0.13  | -0.19  | -0.06  | -0.12  | -0.05  | -0.07  | -0.05  | -0.07  | -0.10  | -0.11  | -0.15 |
| 1.32  | -0.35  | -0.17  | 0.01   | 0.04   | 0.18   | 0.12   | 0.04   | -0.06  | -0.16  | -0.20  | -0.25 |
| 1.37  | -20.58 | -21.84 | -22.50 | -22.46 | -21.69 | -20.28 | -18.15 | -15.97 | -13.58 | -11.21 | -9.00 |
| 1.42  | 92.75  | 87.55  | 81.41  | 74.18  | 67.06  | 60.11  | 53.34  | 46.50  | 39.17  | 31.71  | 24.98 |
| 1.47  | 10.53  | 17.48  | 24.73  | 31.86  | 39.75  | 48.05  | 56.52  | 64.95  | 72.62  | 79.61  | 86.37 |
| 1.52  | 28.34  | 28.45  | 28.62  | 28.70  | 28.75  | 28.93  | 29.35  | 29.91  | 30.60  | 31.47  | 32.30 |
| 1.57  | 25.12  | 25.86  | 26.63  | 27.16  | 27.53  | 27.96  | 28.91  | 29.97  | 31.17  | 32.01  | 32.58 |
| 1.62  | 25.42  | 26.21  | 27.48  | 28.55  | 28.57  | 28.32  | 28.15  | 28.82  | 30.12  | 31.17  | 31.48 |
| 1.67  | 23.95  | 24.58  | 25.37  | 26.12  | 26.87  | 27.60  | 28.32  | 29.08  | 29.66  | 30.33  | 30.95 |
| 1.72  | 22.80  | 23.25  | 23.78  | 24.21  | 24.62  | 25.11  | 25.74  | 26.40  | 27.05  | 27.71  | 28.36 |
| 1.77  | 23.71  | 24.39  | 25.17  | 25.81  | 26.38  | 27.05  | 27.54  | 28.11  | 28.61  | 29.15  | 29.39 |
| 1.82  | 21.42  | 21.87  | 22.66  | 23.22  | 23.95  | 24.68  | 25.52  | 26.31  | 27.15  | 27.94  | 28.61 |
| 1.87  | 23.28  | 23.66  | 24.09  | 24.45  | 24.83  | 25.25  | 25.75  | 26.07  | 26.66  | 27.11  | 27.54 |
| 1.92  | 22.59  | 23.38  | 24.14  | 24.86  | 25.58  | 26.37  | 27.13  | 27.86  | 28.52  | 29.05  | 29.55 |
| 1.97  | 21.28  | 21.74  | 22.26  | 22.82  | 23.31  | 24.00  | 24.69  | 25.40  | 26.09  | 26.90  | 27.50 |
| 2.02  | 21.82  | 22.32  | 22.83  | 23.41  | 23.77  | 24.36  | 24.89  | 25.33  | 25.71  | 26.14  | 26.47 |
| 2.07  | 22.24  | 22.84  | 23.54  | 24.17  | 24.82  | 25.50  | 26.12  | 26.83  | 27.38  | 27.95  | 28.50 |
| 2.12  | 21.06  | 21.52  | 22.07  | 22.51  | 22.94  | 23.45  | 24.07  | 24.56  | 25.19  | 25.93  | 26.40 |
| 2.17  | 21.79  | 22.37  | 22.96  | 23.45  | 24.10  | 24.50  | 25.13  | 25.60  | 26.05  | 26.37  | 26.76 |
| 2.22  | 21.12  | 21.59  | 22.23  | 22.76  | 23.36  | 24.04  | 24.77  | 25.56  | 26.16  | 26.90  | 27.53 |
| 2.27  | 22.22  | 22.59  | 23.13  | 23.59  | 23.97  | 24.33  | 24.86  | 25.40  | 25.81  | 26.36  | 26.73 |
| 2.32  | 21.20  | 21.74  | 22.35  | 22.97  | 23.52  | 24.10  | 24.74  | 25.36  | 25.84  | 26.31  | 26.74 |
| 2.37  | 20.90  | 21.36  | 21.91  | 22.52  | 22.96  | 23.58  | 24.20  | 24.86  | 25.58  | 26.23  | 26.78 |
| 2.42  | 21.35  | 21.90  | 22.33  | 22.85  | 23.26  | 23.67  | 24.20  | 24.66  | 25.17  | 25.57  | 25.99 |

|       |       |       |       |       |       |       |       |       |       |       |       |
|-------|-------|-------|-------|-------|-------|-------|-------|-------|-------|-------|-------|
| 2.47  | 21.83 | 22.40 | 22.98 | 23.59 | 24.15 | 24.74 | 25.36 | 25.99 | 26.43 | 27.05 | 27.40 |
| 2.52  | 20.99 | 21.46 | 21.90 | 22.42 | 22.82 | 23.42 | 23.98 | 24.66 | 25.23 | 25.89 | 26.33 |
| 2.57  | 21.97 | 22.54 | 22.97 | 23.57 | 23.99 | 24.46 | 25.01 | 25.44 | 26.02 | 26.40 | 26.79 |
| 2.62  | 21.15 | 21.67 | 22.26 | 22.85 | 23.38 | 23.95 | 24.60 | 25.30 | 25.87 | 26.51 | 27.00 |
| 2.67  | 20.89 | 21.32 | 21.76 | 22.28 | 22.67 | 23.19 | 23.75 | 24.21 | 24.73 | 25.34 | 25.83 |
| 2.72  | 21.35 | 21.90 | 22.50 | 23.05 | 23.62 | 24.18 | 24.83 | 25.39 | 25.81 | 26.33 | 26.74 |
| 2.77  | 20.77 | 21.14 | 21.74 | 22.26 | 22.67 | 23.34 | 23.86 | 24.47 | 25.16 | 25.68 | 26.19 |
| 2.82  | 20.66 | 21.09 | 21.56 | 22.00 | 22.35 | 22.87 | 23.38 | 23.86 | 24.34 | 24.76 | 25.22 |
| 2.87  | 20.94 | 21.45 | 22.09 | 22.56 | 23.06 | 23.63 | 24.17 | 24.66 | 25.23 | 25.71 | 26.20 |
| 2.92  | 20.71 | 21.11 | 21.63 | 22.04 | 22.59 | 22.97 | 23.66 | 24.22 | 24.71 | 25.28 | 25.80 |
| 2.97  | 20.70 | 21.14 | 21.64 | 22.20 | 22.58 | 23.09 | 23.57 | 24.09 | 24.49 | 24.93 | 25.29 |
| 3.02  | 21.30 | 21.86 | 22.41 | 22.99 | 23.52 | 24.17 | 24.73 | 25.34 | 25.93 | 26.48 | 26.86 |
| 3.07  | 20.46 | 20.91 | 21.37 | 21.82 | 22.28 | 22.74 | 23.25 | 23.72 | 24.25 | 24.75 | 25.22 |
| 3.12  | 20.78 | 21.22 | 21.78 | 22.35 | 22.82 | 23.32 | 23.79 | 24.31 | 24.82 | 25.28 | 25.66 |
| 3.17  | 20.42 | 20.79 | 21.34 | 21.76 | 22.18 | 22.70 | 23.22 | 23.79 | 24.19 | 24.84 | 25.22 |
| 3.22  | 21.19 | 21.59 | 22.07 | 22.59 | 23.05 | 23.42 | 24.02 | 24.48 | 24.97 | 25.47 | 25.89 |
| 3.42  | 20.82 | 21.33 | 21.68 | 22.23 | 22.67 | 23.14 | 23.68 | 24.20 | 24.69 | 25.16 | 25.58 |
| 3.62  | 21.43 | 21.79 | 22.28 | 22.72 | 23.12 | 23.66 | 24.12 | 24.62 | 25.11 | 25.61 | 25.89 |
| 3.82  | 20.76 | 21.26 | 21.77 | 22.18 | 22.67 | 23.19 | 23.73 | 24.30 | 24.81 | 25.32 | 25.78 |
| 4.02  | 21.32 | 21.73 | 22.19 | 22.62 | 23.04 | 23.50 | 23.99 | 24.40 | 24.81 | 25.31 | 25.69 |
| 4.22  | 20.57 | 21.04 | 21.44 | 21.97 | 22.33 | 22.73 | 23.33 | 23.73 | 24.27 | 24.76 | 25.12 |
| 4.42  | 20.92 | 21.32 | 21.88 | 22.27 | 22.70 | 23.16 | 23.53 | 24.23 | 24.67 | 25.20 | 25.49 |
| 4.62  | 20.93 | 21.20 | 21.69 | 22.03 | 22.44 | 22.86 | 23.32 | 23.79 | 24.16 | 24.52 | 24.81 |
| 4.82  | 20.95 | 21.33 | 21.81 | 22.20 | 22.64 | 23.10 | 23.55 | 24.04 | 24.42 | 24.91 | 25.27 |
| 5.02  | 20.89 | 21.20 | 21.67 | 22.03 | 22.45 | 22.86 | 23.33 | 23.76 | 24.03 | 24.54 | 24.81 |
| 5.22  | 21.13 | 21.49 | 21.97 | 22.42 | 22.84 | 23.35 | 23.76 | 24.30 | 24.76 | 25.25 | 25.63 |
| 5.42  | 21.07 | 21.38 | 21.96 | 22.34 | 22.81 | 23.25 | 23.63 | 24.09 | 24.56 | 25.10 | 25.32 |
| 5.62  | 21.13 | 21.53 | 21.97 | 22.42 | 22.79 | 23.17 | 23.61 | 24.06 | 24.52 | 24.93 | 25.27 |
| 5.82  | 21.00 | 21.38 | 21.83 | 22.27 | 22.67 | 23.12 | 23.59 | 24.04 | 24.44 | 24.80 | 25.23 |
| 6.02  | 20.83 | 21.20 | 21.65 | 21.95 | 22.36 | 22.79 | 23.31 | 23.75 | 24.21 | 24.48 | 24.92 |
| 6.22  | 20.79 | 21.14 | 21.69 | 22.03 | 22.48 | 22.85 | 23.27 | 23.73 | 24.22 | 24.69 | 25.03 |
| 6.42  | 20.92 | 21.25 | 21.70 | 22.08 | 22.53 | 22.83 | 23.36 | 23.81 | 24.23 | 24.67 | 25.05 |
| 6.62  | 21.29 | 21.64 | 22.08 | 22.50 | 22.85 | 23.37 | 23.82 | 24.22 | 24.64 | 25.18 | 25.51 |
| 6.82  | 20.77 | 21.16 | 21.58 | 21.96 | 22.32 | 22.78 | 23.12 | 23.52 | 24.02 | 24.38 | 24.73 |
| 7.02  | 21.50 | 21.90 | 22.35 | 22.73 | 23.09 | 23.56 | 24.08 | 24.50 | 24.92 | 25.36 | 25.65 |
| 7.22  | 20.84 | 21.15 | 21.75 | 22.14 | 22.41 | 22.82 | 23.39 | 23.80 | 24.24 | 24.70 | 24.97 |
| 7.42  | 21.46 | 21.85 | 22.30 | 22.63 | 23.06 | 23.52 | 24.03 | 24.40 | 24.86 | 25.29 | 25.60 |
| 7.62  | 20.98 | 21.30 | 21.79 | 22.14 | 22.50 | 22.94 | 23.39 | 23.78 | 24.16 | 24.61 | 24.97 |
| 7.82  | 21.05 | 21.39 | 21.86 | 22.20 | 22.45 | 22.90 | 23.34 | 23.78 | 24.13 | 24.56 | 24.82 |
| 8.02  | 20.67 | 21.04 | 21.42 | 21.84 | 22.21 | 22.56 | 23.05 | 23.37 | 23.83 | 24.27 | 24.54 |
| 8.22  | 21.10 | 21.48 | 21.94 | 22.32 | 22.69 | 23.13 | 23.66 | 24.13 | 24.49 | 24.86 | 25.16 |
| 8.42  | 20.57 | 20.87 | 21.27 | 21.64 | 22.06 | 22.52 | 23.03 | 23.36 | 23.73 | 24.18 | 24.51 |
| 8.62  | 21.02 | 21.34 | 21.73 | 22.15 | 22.52 | 22.92 | 23.31 | 23.77 | 24.19 | 24.57 | 24.94 |
| 8.82  | 21.00 | 21.32 | 21.77 | 22.13 | 22.51 | 22.97 | 23.38 | 23.79 | 24.17 | 24.65 | 24.89 |
| 9.02  | 20.72 | 20.99 | 21.48 | 21.94 | 22.25 | 22.62 | 23.15 | 23.61 | 24.07 | 24.44 | 24.80 |
| 9.22  | 20.80 | 21.24 | 21.63 | 22.03 | 22.38 | 22.85 | 23.27 | 23.68 | 24.12 | 24.49 | 24.88 |
| 9.42  | 20.90 | 21.25 | 21.62 | 22.06 | 22.38 | 22.75 | 23.12 | 23.60 | 24.05 | 24.43 | 24.71 |
| 9.62  | 20.80 | 21.15 | 21.58 | 21.98 | 22.31 | 22.76 | 23.14 | 23.63 | 24.02 | 24.42 | 24.70 |
| 9.82  | 21.04 | 21.38 | 21.81 | 22.23 | 22.64 | 22.97 | 23.47 | 23.91 | 24.33 | 24.75 | 25.11 |
| 10.02 | 20.55 | 20.92 | 21.29 | 21.62 | 22.01 | 22.35 | 22.77 | 23.10 | 23.55 | 23.92 | 24.23 |

|       |       |       |       |       |       |       |       |       |       |       |       |
|-------|-------|-------|-------|-------|-------|-------|-------|-------|-------|-------|-------|
| 10.22 | 20.78 | 21.12 | 21.56 | 21.94 | 22.25 | 22.68 | 23.12 | 23.52 | 23.91 | 24.34 | 24.65 |
| 10.42 | 21.16 | 21.49 | 21.98 | 22.37 | 22.77 | 23.16 | 23.56 | 24.08 | 24.52 | 24.83 | 25.22 |
| 10.62 | 20.85 | 21.27 | 21.73 | 22.10 | 22.41 | 22.86 | 23.33 | 23.78 | 24.14 | 24.58 | 24.82 |
| 10.82 | 20.62 | 21.05 | 21.52 | 21.87 | 22.30 | 22.69 | 23.14 | 23.55 | 24.01 | 24.46 | 24.73 |
| 11.02 | 20.71 | 21.14 | 21.58 | 21.91 | 22.23 | 22.74 | 23.10 | 23.57 | 24.05 | 24.37 | 24.60 |
| 11.22 | 20.57 | 20.86 | 21.33 | 21.63 | 22.01 | 22.38 | 22.85 | 23.25 | 23.57 | 24.03 | 24.33 |
| 11.42 | 20.12 | 20.40 | 20.81 | 21.17 | 21.54 | 21.95 | 22.39 | 22.74 | 23.18 | 23.53 | 23.83 |
| 11.62 | 21.07 | 21.47 | 21.89 | 22.29 | 22.72 | 23.19 | 23.50 | 24.09 | 24.54 | 24.87 | 25.15 |
| 11.82 | 20.61 | 20.92 | 21.32 | 21.69 | 22.08 | 22.41 | 22.89 | 23.27 | 23.58 | 24.05 | 24.36 |
| 12.02 | 20.78 | 21.13 | 21.53 | 21.98 | 22.37 | 22.78 | 23.24 | 23.65 | 24.02 | 24.54 | 24.84 |
| 12.22 | 21.02 | 21.38 | 21.78 | 22.18 | 22.57 | 22.99 | 23.41 | 23.98 | 24.31 | 24.75 | 25.07 |
| 12.42 | 20.44 | 20.82 | 21.34 | 21.77 | 22.04 | 22.50 | 22.96 | 23.37 | 23.73 | 24.13 | 24.57 |
| 12.62 | 20.28 | 20.64 | 21.03 | 21.48 | 21.73 | 22.21 | 22.62 | 23.02 | 23.39 | 23.74 | 24.06 |
| 12.82 | 20.43 | 20.67 | 21.15 | 21.51 | 21.83 | 22.21 | 22.68 | 23.10 | 23.43 | 23.86 | 24.19 |
| 13.02 | 20.71 | 21.07 | 21.52 | 22.01 | 22.33 | 22.83 | 23.21 | 23.68 | 24.02 | 24.57 | 24.81 |
| 13.22 | 20.75 | 21.17 | 21.60 | 21.99 | 22.37 | 22.79 | 23.23 | 23.58 | 24.11 | 24.37 | 24.74 |
| 13.42 | 20.72 | 21.06 | 21.42 | 21.91 | 22.24 | 22.65 | 23.05 | 23.53 | 23.99 | 24.37 | 24.75 |
| 13.50 | 20.50 | 20.78 | 21.22 | 21.63 | 21.90 | 22.25 | 22.77 | 23.16 | 23.46 | 23.87 | 24.17 |
| 13.59 | 20.70 | 21.13 | 21.49 | 21.90 | 22.30 | 22.78 | 23.12 | 23.65 | 24.10 | 24.42 | 24.82 |
| 13.68 | 20.59 | 20.98 | 21.40 | 21.77 | 22.07 | 22.51 | 22.90 | 23.32 | 23.71 | 24.15 | 24.39 |
| 13.78 | 20.19 | 20.58 | 20.94 | 21.37 | 21.70 | 22.17 | 22.53 | 22.88 | 23.25 | 23.71 | 24.02 |
| 13.88 | 20.52 | 20.94 | 21.43 | 21.78 | 22.10 | 22.58 | 22.93 | 23.42 | 23.86 | 24.29 | 24.49 |
| 14.00 | 20.86 | 21.22 | 21.59 | 21.99 | 22.35 | 22.74 | 23.22 | 23.59 | 23.99 | 24.40 | 24.68 |
| 14.12 | 20.61 | 20.90 | 21.33 | 21.73 | 22.10 | 22.47 | 22.93 | 23.38 | 23.78 | 24.17 | 24.41 |
| 14.25 | 20.59 | 21.02 | 21.43 | 21.89 | 22.19 | 22.56 | 23.03 | 23.48 | 23.88 | 24.34 | 24.64 |
| 14.40 | 20.94 | 21.34 | 21.79 | 22.15 | 22.50 | 22.93 | 23.34 | 23.79 | 24.22 | 24.58 | 24.91 |
| 14.55 | 20.37 | 20.70 | 21.17 | 21.56 | 21.85 | 22.27 | 22.68 | 23.08 | 23.43 | 23.87 | 24.21 |
| 14.72 | 20.36 | 20.74 | 21.16 | 21.56 | 21.91 | 22.31 | 22.78 | 23.19 | 23.57 | 24.00 | 24.28 |
| 14.90 | 20.36 | 20.65 | 21.07 | 21.54 | 21.85 | 22.24 | 22.71 | 23.10 | 23.50 | 23.89 | 24.24 |
| 15.09 | 20.22 | 20.52 | 20.87 | 21.25 | 21.60 | 22.02 | 22.36 | 22.78 | 23.15 | 23.48 | 23.82 |
| 15.30 | 20.73 | 21.09 | 21.48 | 21.84 | 22.22 | 22.61 | 23.03 | 23.49 | 23.83 | 24.32 | 24.46 |
| 15.53 | 20.88 | 21.24 | 21.61 | 22.06 | 22.34 | 22.71 | 23.18 | 23.52 | 23.93 | 24.26 | 24.62 |
| 15.77 | 20.76 | 21.13 | 21.56 | 21.99 | 22.22 | 22.63 | 23.16 | 23.60 | 23.87 | 24.26 | 24.61 |
| 16.04 | 20.74 | 21.13 | 21.60 | 21.92 | 22.33 | 22.74 | 23.25 | 23.61 | 24.12 | 24.49 | 24.87 |
| 16.32 | 20.61 | 20.93 | 21.48 | 21.78 | 22.11 | 22.54 | 22.96 | 23.41 | 23.69 | 24.05 | 24.39 |
| 16.63 | 20.67 | 20.90 | 21.38 | 21.80 | 22.15 | 22.60 | 22.97 | 23.40 | 23.77 | 24.12 | 24.43 |
| 16.96 | 20.94 | 21.34 | 21.76 | 22.09 | 22.48 | 22.82 | 23.26 | 23.68 | 23.98 | 24.41 | 24.65 |
| 17.31 | 20.58 | 21.00 | 21.36 | 21.79 | 22.10 | 22.55 | 22.93 | 23.38 | 23.79 | 24.11 | 24.48 |
| 17.70 | 21.07 | 21.47 | 21.88 | 22.18 | 22.53 | 22.98 | 23.39 | 23.70 | 24.18 | 24.53 | 24.80 |
| 18.11 | 20.19 | 20.59 | 20.99 | 21.39 | 21.69 | 22.12 | 22.57 | 22.93 | 23.34 | 23.74 | 24.05 |
| 18.56 | 20.60 | 20.92 | 21.45 | 21.82 | 22.16 | 22.57 | 23.02 | 23.45 | 23.84 | 24.32 | 24.62 |
| 19.04 | 20.48 | 20.82 | 21.23 | 21.57 | 21.89 | 22.30 | 22.76 | 23.11 | 23.42 | 23.83 | 24.16 |
| 19.56 | 20.91 | 21.24 | 21.65 | 22.08 | 22.41 | 22.85 | 23.22 | 23.65 | 23.93 | 24.36 | 24.61 |
| 20.12 | 20.68 | 20.96 | 21.44 | 21.79 | 22.12 | 22.53 | 22.92 | 23.32 | 23.66 | 24.11 | 24.35 |
| 20.72 | 20.99 | 21.40 | 21.84 | 22.20 | 22.57 | 22.94 | 23.40 | 23.83 | 24.33 | 24.64 | 24.95 |
| 21.37 | 20.88 | 21.16 | 21.59 | 21.89 | 22.27 | 22.59 | 23.07 | 23.49 | 23.85 | 24.21 | 24.46 |
| 22.08 | 21.05 | 21.42 | 21.86 | 22.19 | 22.63 | 23.05 | 23.47 | 23.95 | 24.29 | 24.67 | 25.07 |
| 22.84 | 21.27 | 21.64 | 22.06 | 22.45 | 22.79 | 23.16 | 23.64 | 24.06 | 24.40 | 24.82 | 25.01 |
| 23.65 | 20.59 | 20.91 | 21.30 | 21.69 | 21.98 | 22.50 | 22.81 | 23.30 | 23.62 | 24.12 | 24.35 |
| 24.54 | 20.80 | 21.09 | 21.53 | 21.83 | 22.08 | 22.52 | 22.92 | 23.25 | 23.61 | 23.99 | 24.21 |

|        |       |       |       |       |       |       |       |       |       |       |       |
|--------|-------|-------|-------|-------|-------|-------|-------|-------|-------|-------|-------|
| 25.49  | 21.13 | 21.43 | 21.77 | 22.23 | 22.54 | 22.90 | 23.34 | 23.66 | 24.03 | 24.39 | 24.76 |
| 26.51  | 20.33 | 20.68 | 21.02 | 21.43 | 21.73 | 22.09 | 22.46 | 22.83 | 23.09 | 23.48 | 23.80 |
| 27.62  | 20.92 | 21.25 | 21.67 | 22.00 | 22.28 | 22.57 | 23.09 | 23.36 | 23.72 | 24.05 | 24.26 |
| 28.81  | 21.02 | 21.45 | 21.79 | 22.22 | 22.47 | 22.94 | 23.35 | 23.76 | 24.11 | 24.51 | 24.75 |
| 30.10  | 20.44 | 20.72 | 21.07 | 21.49 | 21.76 | 22.12 | 22.44 | 22.85 | 23.06 | 23.42 | 23.80 |
| 31.49  | 21.06 | 21.45 | 21.84 | 22.24 | 22.55 | 22.98 | 23.30 | 23.76 | 24.05 | 24.45 | 24.71 |
| 32.98  | 20.69 | 20.96 | 21.36 | 21.71 | 22.08 | 22.35 | 22.86 | 23.13 | 23.59 | 23.85 | 24.22 |
| 34.60  | 21.09 | 21.36 | 21.75 | 22.12 | 22.39 | 22.73 | 23.09 | 23.42 | 23.72 | 24.08 | 24.30 |
| 36.34  | 20.74 | 21.01 | 21.45 | 21.68 | 22.03 | 22.38 | 22.72 | 23.04 | 23.36 | 23.62 | 23.91 |
| 38.21  | 21.30 | 21.62 | 21.97 | 22.30 | 22.66 | 22.98 | 23.34 | 23.72 | 24.07 | 24.28 | 24.61 |
| 40.24  | 21.05 | 21.36 | 21.72 | 21.96 | 22.40 | 22.75 | 23.08 | 23.45 | 23.77 | 24.15 | 24.34 |
| 42.42  | 20.54 | 20.83 | 21.20 | 21.49 | 21.86 | 22.14 | 22.57 | 22.90 | 23.25 | 23.53 | 23.78 |
| 44.78  | 20.72 | 21.04 | 21.39 | 21.69 | 21.94 | 22.36 | 22.60 | 22.89 | 23.35 | 23.60 | 23.81 |
| 47.32  | 20.73 | 21.09 | 21.41 | 21.69 | 22.00 | 22.40 | 22.71 | 23.10 | 23.41 | 23.72 | 23.92 |
| 50.06  | 21.01 | 21.24 | 21.67 | 21.94 | 22.22 | 22.64 | 22.94 | 23.31 | 23.63 | 23.96 | 24.20 |
| 53.01  | 20.94 | 21.24 | 21.56 | 21.90 | 22.27 | 22.46 | 22.84 | 23.13 | 23.45 | 23.74 | 23.92 |
| 56.20  | 20.85 | 21.11 | 21.49 | 21.90 | 22.08 | 22.41 | 22.68 | 23.05 | 23.40 | 23.56 | 23.81 |
| 59.64  | 21.23 | 21.47 | 21.80 | 22.04 | 22.35 | 22.62 | 22.96 | 23.25 | 23.51 | 23.71 | 23.86 |
| 63.34  | 20.64 | 20.83 | 21.19 | 21.53 | 21.80 | 22.04 | 22.48 | 22.78 | 23.06 | 23.31 | 23.53 |
| 67.34  | 20.73 | 20.88 | 21.29 | 21.54 | 21.82 | 22.04 | 22.43 | 22.72 | 22.94 | 23.12 | 23.42 |
| 71.65  | 21.16 | 21.24 | 21.61 | 21.85 | 22.03 | 22.36 | 22.69 | 22.94 | 23.23 | 23.55 | 23.60 |
| 76.30  | 20.99 | 21.31 | 21.67 | 21.94 | 22.15 | 22.45 | 22.79 | 23.04 | 23.33 | 23.65 | 23.78 |
| 81.32  | 21.24 | 21.47 | 21.80 | 22.02 | 22.32 | 22.55 | 22.85 | 23.19 | 23.38 | 23.67 | 23.90 |
| 86.73  | 21.24 | 21.51 | 21.78 | 22.02 | 22.20 | 22.47 | 22.68 | 23.07 | 23.22 | 23.38 | 23.65 |
| 92.56  | 21.48 | 21.61 | 21.92 | 22.19 | 22.38 | 22.70 | 22.98 | 23.19 | 23.49 | 23.55 | 23.76 |
| 98.85  | 20.90 | 21.02 | 21.38 | 21.67 | 21.85 | 22.08 | 22.43 | 22.65 | 22.81 | 23.08 | 23.24 |
| 105.64 | 21.64 | 21.83 | 22.09 | 22.29 | 22.65 | 22.86 | 23.11 | 23.40 | 23.53 | 23.66 | 23.84 |
| 112.96 | 21.47 | 21.68 | 21.88 | 22.11 | 22.29 | 22.59 | 22.84 | 23.04 | 23.29 | 23.47 | 23.49 |
| 120.85 | 21.24 | 21.44 | 21.62 | 21.86 | 22.08 | 22.26 | 22.43 | 22.72 | 22.85 | 23.13 | 23.22 |
| 129.36 | 21.85 | 22.03 | 22.31 | 22.52 | 22.72 | 22.96 | 23.18 | 23.50 | 23.62 | 23.80 | 23.94 |
| 138.55 | 21.51 | 21.67 | 22.01 | 22.23 | 22.39 | 22.66 | 22.92 | 23.15 | 23.32 | 23.49 | 23.64 |
| 148.45 | 21.24 | 21.42 | 21.71 | 21.92 | 22.12 | 22.36 | 22.55 | 22.80 | 22.92 | 23.14 | 23.30 |
| 159.13 | 21.54 | 21.71 | 22.02 | 22.19 | 22.40 | 22.66 | 22.82 | 23.02 | 23.18 | 23.30 | 23.35 |
| 170.65 | 21.50 | 21.60 | 21.90 | 22.00 | 22.10 | 22.29 | 22.50 | 22.66 | 22.78 | 22.87 | 22.97 |
| 183.07 | 21.67 | 21.79 | 22.00 | 22.20 | 22.34 | 22.46 | 22.67 | 22.81 | 22.93 | 22.97 | 23.06 |
| 196.47 | 21.54 | 21.63 | 21.85 | 22.00 | 22.05 | 22.19 | 22.43 | 22.49 | 22.63 | 22.79 | 22.81 |
| 210.91 | 21.59 | 21.74 | 21.94 | 22.03 | 22.10 | 22.24 | 22.40 | 22.43 | 22.59 | 22.66 | 22.62 |
| 226.50 | 21.67 | 21.74 | 21.96 | 22.05 | 22.11 | 22.25 | 22.43 | 22.56 | 22.57 | 22.79 | 22.78 |
| 243.31 | 21.73 | 21.83 | 21.99 | 22.02 | 22.20 | 22.30 | 22.42 | 22.54 | 22.55 | 22.63 | 22.69 |
| 261.43 | 22.02 | 22.14 | 22.23 | 22.39 | 22.39 | 22.45 | 22.58 | 22.71 | 22.84 | 22.86 | 22.83 |
| 280.98 | 21.89 | 21.93 | 22.11 | 22.15 | 22.26 | 22.36 | 22.51 | 22.55 | 22.63 | 22.73 | 22.71 |
| 302.07 | 21.63 | 21.72 | 21.87 | 21.94 | 21.91 | 22.06 | 22.17 | 22.23 | 22.31 | 22.26 | 22.24 |
| 324.81 | 21.81 | 21.82 | 21.95 | 21.92 | 21.98 | 21.99 | 22.10 | 22.15 | 22.10 | 22.16 | 22.15 |
| 349.33 | 21.76 | 21.72 | 21.85 | 21.84 | 21.88 | 21.97 | 21.97 | 22.01 | 22.07 | 22.08 | 22.00 |
| 375.79 | 21.93 | 21.96 | 22.04 | 22.09 | 22.11 | 22.14 | 22.30 | 22.31 | 22.31 | 22.34 | 22.26 |
| 404.31 | 21.65 | 21.61 | 21.74 | 21.77 | 21.82 | 21.86 | 21.96 | 22.05 | 22.02 | 22.01 | 21.99 |
| 435.08 | 21.96 | 21.92 | 22.07 | 22.09 | 22.07 | 22.04 | 22.10 | 22.08 | 22.09 | 22.03 | 21.88 |
| 468.27 | 21.96 | 22.00 | 22.04 | 22.03 | 22.00 | 21.98 | 22.04 | 22.07 | 21.94 | 22.00 | 21.86 |
| 504.06 | 22.00 | 21.81 | 22.01 | 21.97 | 21.91 | 22.03 | 21.99 | 21.95 | 21.95 | 21.94 | 21.78 |
| 542.66 | 21.93 | 21.89 | 21.97 | 21.88 | 21.86 | 21.84 | 21.83 | 21.77 | 21.73 | 21.76 | 21.63 |

|         |       |       |       |       |       |       |       |       |       |       |       |
|---------|-------|-------|-------|-------|-------|-------|-------|-------|-------|-------|-------|
| 584.29  | 21.85 | 21.79 | 21.92 | 21.87 | 21.84 | 21.84 | 21.83 | 21.85 | 21.80 | 21.74 | 21.67 |
| 629.18  | 21.92 | 21.84 | 21.95 | 21.94 | 21.84 | 21.95 | 21.91 | 21.98 | 21.81 | 21.83 | 21.73 |
| 677.61  | 22.13 | 22.03 | 22.08 | 22.06 | 22.07 | 22.05 | 22.12 | 22.07 | 21.90 | 21.84 | 21.77 |
| 729.83  | 21.65 | 21.56 | 21.63 | 21.57 | 21.46 | 21.45 | 21.37 | 21.34 | 21.24 | 21.17 | 20.89 |
| 786.16  | 21.90 | 21.87 | 21.92 | 21.87 | 21.81 | 21.84 | 21.77 | 21.77 | 21.69 | 21.58 | 21.54 |
| 846.90  | 21.67 | 21.64 | 21.63 | 21.53 | 21.44 | 21.36 | 21.24 | 21.31 | 21.08 | 21.01 | 20.81 |
| 912.42  | 21.71 | 21.61 | 21.59 | 21.40 | 21.34 | 21.24 | 21.16 | 21.03 | 20.92 | 20.82 | 20.66 |
| 983.08  | 21.97 | 21.84 | 21.85 | 21.72 | 21.70 | 21.63 | 21.56 | 21.51 | 21.39 | 21.30 | 21.09 |
| 1059.29 | 21.89 | 21.80 | 21.70 | 21.67 | 21.56 | 21.60 | 21.47 | 21.50 | 21.30 | 21.19 | 21.02 |
| 1141.48 | 21.60 | 21.56 | 21.41 | 21.28 | 21.24 | 21.09 | 21.10 | 20.98 | 20.80 | 20.73 | 20.51 |
| 1230.13 | 21.61 | 21.49 | 21.49 | 21.46 | 21.39 | 21.35 | 21.25 | 21.26 | 21.19 | 21.05 | 20.98 |
| 1325.73 | 22.00 | 21.89 | 21.91 | 21.84 | 21.75 | 21.68 | 21.69 | 21.56 | 21.46 | 21.33 | 21.13 |
| 1428.84 | 21.64 | 21.50 | 21.45 | 21.36 | 21.20 | 21.22 | 21.12 | 21.03 | 20.91 | 20.82 | 20.72 |
| 1540.05 | 21.87 | 21.64 | 21.65 | 21.59 | 21.50 | 21.41 | 21.31 | 21.20 | 21.16 | 20.99 | 20.90 |
| 1659.99 | 21.54 | 21.49 | 21.44 | 21.48 | 21.19 | 21.15 | 21.05 | 21.01 | 20.89 | 20.86 | 20.60 |
| 1789.34 | 21.43 | 21.34 | 21.22 | 21.16 | 20.97 | 20.94 | 20.86 | 20.78 | 20.61 | 20.47 | 20.25 |
| 1928.85 | 21.50 | 21.30 | 21.28 | 21.19 | 21.08 | 20.96 | 20.88 | 20.79 | 20.68 | 20.52 | 20.31 |
| 2079.31 | 21.31 | 21.30 | 21.13 | 21.09 | 21.00 | 20.87 | 20.81 | 20.70 | 20.51 | 20.44 | 20.34 |
| 2241.59 | 21.24 | 21.11 | 21.10 | 20.95 | 20.80 | 20.77 | 20.67 | 20.53 | 20.45 | 20.30 | 20.17 |
| 2416.60 | 21.29 | 21.23 | 21.14 | 21.04 | 20.92 | 20.91 | 20.90 | 20.89 | 20.73 | 20.59 | 20.46 |
| 2605.36 | 21.17 | 21.04 | 20.96 | 20.94 | 20.78 | 20.77 | 20.61 | 20.64 | 20.53 | 20.44 | 20.25 |
| 2808.94 | 20.99 | 20.89 | 20.82 | 20.63 | 20.57 | 20.47 | 20.36 | 20.17 | 20.07 | 19.89 | 19.78 |
| 3028.50 | 20.76 | 20.54 | 20.47 | 20.40 | 20.23 | 20.03 | 20.00 | 19.90 | 19.67 | 19.55 | 19.27 |
| 3265.30 | 20.80 | 20.71 | 20.60 | 20.58 | 20.44 | 20.35 | 20.24 | 20.23 | 20.07 | 19.95 | 19.86 |
| 3520.69 | 20.67 | 20.55 | 20.56 | 20.44 | 20.43 | 20.32 | 20.18 | 20.17 | 20.00 | 19.84 | 19.76 |
| 3796.13 | 20.25 | 20.22 | 20.18 | 20.03 | 19.94 | 19.89 | 19.82 | 19.70 | 19.67 | 19.47 | 19.38 |

| Wavelength (nm) \ Time (ps) | 663.05 | 664.47 | 665.89 | 667.32 | 668.74 | 670.17 |
|-----------------------------|--------|--------|--------|--------|--------|--------|
| -3.78                       | -0.01  | 0.02   | -0.05  | 0.00   | -0.11  | -0.14  |
| -3.28                       | -0.11  | -0.10  | -0.05  | -0.09  | -0.18  | -0.14  |
| -2.78                       | 0.00   | -0.02  | -0.01  | -0.01  | -0.01  | 0.08   |
| -2.28                       | -0.09  | -0.07  | -0.04  | -0.08  | -0.05  | -0.03  |
| -1.78                       | 0.20   | 0.24   | 0.16   | 0.27   | 0.27   | 0.20   |
| -1.28                       | 0.20   | 0.21   | 0.24   | 0.18   | 0.29   | 0.26   |
| -0.78                       | -0.17  | -0.28  | -0.19  | -0.19  | -0.31  | -0.27  |
| -0.28                       | -0.01  | 0.00   | -0.05  | -0.08  | 0.09   | 0.03   |
| -0.18                       | -0.09  | -0.03  | -0.02  | -0.01  | 0.00   | 0.00   |
| -0.08                       | -0.01  | 0.02   | -0.11  | -0.02  | -0.15  | -0.12  |
| 0.02                        | -0.07  | -0.13  | -0.20  | -0.12  | -0.08  | -0.18  |
| 0.12                        | 0.05   | 0.16   | 0.07   | 0.04   | -0.13  | -0.22  |
| 0.22                        | -0.07  | -0.10  | -0.13  | -0.11  | -0.17  | -0.16  |
| 0.27                        | 0.23   | 0.17   | 0.20   | 0.21   | 0.06   | -0.04  |
| 0.32                        | -0.13  | -0.01  | -0.11  | -0.09  | -0.17  | -0.13  |
| 0.37                        | 0.35   | 0.29   | 0.35   | 0.24   | 0.25   | 0.27   |
| 0.42                        | 0.36   | 0.24   | 0.21   | 0.23   | 0.18   | 0.20   |
| 0.47                        | 0.14   | 0.11   | 0.17   | 0.02   | -0.03  | -0.12  |
| 0.52                        | 0.02   | 0.07   | 0.04   | 0.10   | 0.05   | 0.04   |

|      |       |       |        |        |        |        |
|------|-------|-------|--------|--------|--------|--------|
| 0.57 | 0.29  | 0.31  | 0.20   | 0.29   | 0.29   | 0.30   |
| 0.62 | 0.05  | 0.09  | 0.07   | 0.22   | 0.05   | 0.12   |
| 0.67 | 0.20  | 0.17  | 0.06   | 0.12   | 0.10   | 0.04   |
| 0.72 | 0.38  | 0.41  | 0.35   | 0.34   | 0.33   | 0.30   |
| 0.77 | 0.18  | 0.15  | 0.22   | 0.13   | 0.12   | 0.18   |
| 0.82 | -0.06 | -0.06 | -0.11  | -0.06  | -0.04  | -0.20  |
| 0.87 | 0.11  | 0.13  | 0.13   | 0.07   | 0.09   | 0.07   |
| 0.92 | -0.20 | -0.26 | -0.33  | -0.24  | -0.23  | -0.28  |
| 0.97 | 0.40  | 0.44  | 0.41   | 0.39   | 0.38   | 0.30   |
| 1.02 | -0.15 | -0.19 | -0.18  | -0.11  | -0.11  | -0.21  |
| 1.07 | -0.22 | -0.16 | -0.22  | -0.17  | -0.30  | -0.19  |
| 1.12 | -0.02 | -0.08 | 0.00   | 0.00   | 0.01   | 0.02   |
| 1.17 | -0.48 | -0.57 | -0.66  | -0.65  | -0.65  | -0.58  |
| 1.22 | -0.21 | -0.12 | -0.06  | -0.06  | -0.05  | -0.09  |
| 1.27 | -0.15 | -0.14 | -0.28  | -0.17  | -0.12  | -0.16  |
| 1.32 | -0.29 | -0.44 | -0.42  | -0.39  | -0.33  | -0.26  |
| 1.37 | -7.12 | -5.72 | -4.64  | -3.80  | -3.13  | -2.41  |
| 1.42 | 19.10 | 13.94 | 9.42   | 5.14   | 1.38   | -1.45  |
| 1.47 | 93.39 | 99.99 | 106.20 | 110.30 | 112.40 | 112.79 |
| 1.52 | 33.11 | 33.66 | 33.98  | 33.91  | 33.53  | 33.27  |
| 1.57 | 32.90 | 33.56 | 34.67  | 35.76  | 36.24  | 36.33  |
| 1.62 | 30.78 | 29.93 | 30.07  | 31.37  | 33.46  | 35.18  |
| 1.67 | 31.44 | 31.86 | 32.19  | 32.60  | 32.85  | 33.46  |
| 1.72 | 29.10 | 29.88 | 30.57  | 31.29  | 32.04  | 32.65  |
| 1.77 | 29.70 | 29.98 | 30.21  | 30.52  | 30.78  | 31.20  |
| 1.82 | 29.36 | 30.09 | 30.63  | 31.17  | 31.59  | 32.17  |
| 1.87 | 28.05 | 28.71 | 29.21  | 29.76  | 30.23  | 30.71  |
| 1.92 | 29.98 | 30.29 | 30.69  | 30.96  | 31.21  | 31.43  |
| 1.97 | 28.21 | 28.88 | 29.62  | 30.15  | 30.70  | 31.20  |
| 2.02 | 26.83 | 27.30 | 27.73  | 28.16  | 28.61  | 29.13  |
| 2.07 | 28.87 | 29.21 | 29.54  | 29.86  | 29.99  | 30.37  |
| 2.12 | 27.01 | 27.58 | 28.30  | 28.74  | 29.30  | 30.00  |
| 2.17 | 27.07 | 27.33 | 27.66  | 28.01  | 28.37  | 28.69  |
| 2.22 | 28.09 | 28.65 | 29.18  | 29.54  | 30.04  | 30.54  |
| 2.27 | 27.30 | 27.58 | 28.15  | 28.53  | 28.86  | 29.20  |
| 2.32 | 27.15 | 27.51 | 27.88  | 28.27  | 28.47  | 28.92  |
| 2.37 | 27.45 | 27.99 | 28.56  | 29.12  | 29.52  | 30.02  |
| 2.42 | 26.55 | 26.98 | 27.40  | 27.84  | 28.21  | 28.68  |
| 2.47 | 27.82 | 28.21 | 28.51  | 28.69  | 28.82  | 29.10  |
| 2.52 | 26.97 | 27.54 | 28.06  | 28.65  | 29.07  | 29.69  |
| 2.57 | 27.12 | 27.45 | 27.78  | 28.13  | 28.26  | 28.56  |
| 2.62 | 27.44 | 27.79 | 28.22  | 28.59  | 28.91  | 29.31  |
| 2.67 | 26.29 | 26.81 | 27.30  | 27.72  | 28.09  | 28.53  |
| 2.72 | 27.05 | 27.47 | 27.73  | 28.01  | 28.14  | 28.42  |
| 2.77 | 26.81 | 27.30 | 27.72  | 28.26  | 28.61  | 28.99  |
| 2.82 | 25.54 | 26.08 | 26.50  | 26.88  | 27.21  | 27.68  |
| 2.87 | 26.48 | 26.87 | 27.23  | 27.41  | 27.60  | 27.89  |
| 2.92 | 26.33 | 26.83 | 27.26  | 27.72  | 28.03  | 28.51  |
| 2.97 | 25.67 | 26.02 | 26.43  | 26.89  | 27.15  | 27.48  |
| 3.02 | 27.33 | 27.65 | 27.95  | 28.26  | 28.25  | 28.49  |

|       |       |       |       |       |       |       |
|-------|-------|-------|-------|-------|-------|-------|
| 3.07  | 25.64 | 26.06 | 26.56 | 27.13 | 27.43 | 27.87 |
| 3.12  | 25.95 | 26.39 | 26.75 | 27.07 | 27.31 | 27.63 |
| 3.17  | 25.73 | 26.11 | 26.46 | 26.77 | 27.06 | 27.44 |
| 3.22  | 26.30 | 26.70 | 27.07 | 27.43 | 27.71 | 28.14 |
| 3.42  | 25.95 | 26.33 | 26.79 | 26.99 | 27.38 | 27.73 |
| 3.62  | 26.36 | 26.79 | 27.11 | 27.41 | 27.67 | 27.94 |
| 3.82  | 26.14 | 26.49 | 27.04 | 27.32 | 27.60 | 28.00 |
| 4.02  | 26.10 | 26.44 | 26.76 | 26.98 | 27.22 | 27.45 |
| 4.22  | 25.42 | 25.83 | 26.17 | 26.47 | 26.80 | 27.13 |
| 4.42  | 25.98 | 26.30 | 26.62 | 26.97 | 27.11 | 27.49 |
| 4.62  | 25.18 | 25.50 | 25.92 | 26.07 | 26.41 | 26.70 |
| 4.82  | 25.64 | 25.91 | 26.23 | 26.44 | 26.60 | 26.93 |
| 5.02  | 25.16 | 25.47 | 25.83 | 26.17 | 26.30 | 26.83 |
| 5.22  | 26.00 | 26.40 | 26.74 | 27.02 | 27.25 | 27.46 |
| 5.42  | 25.66 | 26.05 | 26.39 | 26.78 | 27.08 | 27.35 |
| 5.62  | 25.65 | 25.87 | 26.28 | 26.54 | 26.69 | 26.94 |
| 5.82  | 25.63 | 25.88 | 26.20 | 26.51 | 26.71 | 26.92 |
| 6.02  | 25.36 | 25.69 | 25.93 | 26.20 | 26.50 | 26.79 |
| 6.22  | 25.36 | 25.80 | 26.11 | 26.44 | 26.68 | 27.04 |
| 6.42  | 25.44 | 25.71 | 26.14 | 26.47 | 26.67 | 27.10 |
| 6.62  | 25.85 | 26.20 | 26.47 | 26.79 | 27.04 | 27.34 |
| 6.82  | 25.01 | 25.42 | 25.66 | 26.13 | 26.28 | 26.68 |
| 7.02  | 25.94 | 26.28 | 26.60 | 26.73 | 26.88 | 27.01 |
| 7.22  | 25.36 | 25.71 | 26.08 | 26.40 | 26.62 | 27.00 |
| 7.42  | 25.96 | 26.32 | 26.55 | 26.88 | 27.06 | 27.24 |
| 7.62  | 25.29 | 25.71 | 25.95 | 26.38 | 26.49 | 26.79 |
| 7.82  | 25.08 | 25.31 | 25.60 | 25.90 | 25.95 | 26.22 |
| 8.02  | 24.96 | 25.20 | 25.54 | 25.90 | 26.14 | 26.56 |
| 8.22  | 25.51 | 25.69 | 26.00 | 26.10 | 26.18 | 26.11 |
| 8.42  | 24.87 | 25.17 | 25.49 | 25.83 | 26.04 | 26.38 |
| 8.62  | 25.23 | 25.51 | 25.73 | 26.03 | 26.13 | 26.31 |
| 8.82  | 25.25 | 25.53 | 25.75 | 26.13 | 26.27 | 26.55 |
| 9.02  | 25.15 | 25.53 | 25.73 | 26.09 | 26.32 | 26.58 |
| 9.22  | 25.18 | 25.49 | 25.81 | 26.13 | 26.45 | 26.58 |
| 9.42  | 25.02 | 25.31 | 25.55 | 25.83 | 26.07 | 26.43 |
| 9.62  | 25.05 | 25.45 | 25.68 | 25.97 | 26.15 | 26.57 |
| 9.82  | 25.45 | 25.72 | 26.02 | 26.22 | 26.32 | 26.49 |
| 10.02 | 24.58 | 24.86 | 25.15 | 25.44 | 25.73 | 26.03 |
| 10.22 | 24.90 | 25.29 | 25.65 | 25.94 | 26.20 | 26.53 |
| 10.42 | 25.57 | 25.86 | 26.07 | 26.28 | 26.33 | 26.65 |
| 10.62 | 25.17 | 25.52 | 25.81 | 26.08 | 26.27 | 26.52 |
| 10.82 | 25.10 | 25.48 | 25.87 | 26.15 | 26.39 | 26.63 |
| 11.02 | 24.96 | 25.33 | 25.61 | 25.81 | 25.96 | 26.27 |
| 11.22 | 24.71 | 25.10 | 25.22 | 25.49 | 25.72 | 25.96 |
| 11.42 | 24.29 | 24.42 | 24.75 | 25.08 | 25.40 | 25.67 |
| 11.62 | 25.51 | 25.77 | 25.98 | 26.17 | 26.08 | 26.29 |
| 11.82 | 24.61 | 24.90 | 25.26 | 25.55 | 25.75 | 26.09 |
| 12.02 | 25.21 | 25.48 | 25.77 | 26.02 | 26.10 | 26.32 |
| 12.22 | 25.37 | 25.64 | 26.00 | 26.18 | 26.35 | 26.59 |
| 12.42 | 24.91 | 25.06 | 25.58 | 25.80 | 25.97 | 26.26 |



|       |       |       |       |       |       |       |
|-------|-------|-------|-------|-------|-------|-------|
| 12.62 | 24.37 | 24.77 | 25.01 | 25.33 | 25.56 | 25.88 |
| 12.82 | 24.51 | 24.82 | 25.06 | 25.28 | 25.47 | 25.66 |
| 13.02 | 25.15 | 25.48 | 25.89 | 26.18 | 26.42 | 26.78 |
| 13.22 | 25.04 | 25.28 | 25.65 | 25.81 | 25.92 | 26.18 |
| 13.42 | 24.92 | 25.38 | 25.52 | 25.83 | 25.93 | 26.24 |
| 13.50 | 24.53 | 24.87 | 25.07 | 25.29 | 25.46 | 25.74 |
| 13.59 | 25.12 | 25.48 | 25.73 | 26.01 | 26.14 | 26.50 |
| 13.68 | 24.58 | 24.95 | 25.20 | 25.48 | 25.62 | 25.76 |
| 13.78 | 24.33 | 24.59 | 24.95 | 25.11 | 25.28 | 25.72 |
| 13.88 | 24.83 | 25.13 | 25.42 | 25.67 | 25.78 | 26.10 |
| 14.00 | 24.98 | 25.31 | 25.54 | 25.73 | 25.92 | 26.11 |
| 14.12 | 24.75 | 25.12 | 25.46 | 25.73 | 26.00 | 26.26 |
| 14.25 | 24.87 | 25.07 | 25.33 | 25.49 | 25.64 | 25.83 |
| 14.40 | 25.24 | 25.49 | 25.76 | 26.06 | 26.30 | 26.57 |
| 14.55 | 24.54 | 24.82 | 25.13 | 25.41 | 25.62 | 25.91 |
| 14.72 | 24.62 | 24.90 | 25.21 | 25.35 | 25.57 | 25.91 |
| 14.90 | 24.54 | 24.82 | 25.09 | 25.37 | 25.50 | 25.80 |
| 15.09 | 24.14 | 24.40 | 24.65 | 25.00 | 25.23 | 25.49 |
| 15.30 | 24.86 | 25.01 | 25.29 | 25.45 | 25.35 | 25.56 |
| 15.53 | 24.88 | 25.05 | 25.33 | 25.63 | 25.91 | 26.08 |
| 15.77 | 24.96 | 25.11 | 25.42 | 25.52 | 25.68 | 25.90 |
| 16.04 | 25.10 | 25.44 | 25.76 | 25.98 | 26.15 | 26.42 |
| 16.32 | 24.71 | 24.90 | 25.19 | 25.32 | 25.53 | 25.72 |
| 16.63 | 24.70 | 25.05 | 25.35 | 25.67 | 25.76 | 26.09 |
| 16.96 | 25.02 | 25.20 | 25.38 | 25.64 | 25.77 | 25.85 |
| 17.31 | 24.77 | 25.05 | 25.39 | 25.62 | 25.72 | 26.00 |
| 17.70 | 25.12 | 25.47 | 25.65 | 25.82 | 25.94 | 26.25 |
| 18.11 | 24.35 | 24.72 | 24.91 | 25.34 | 25.48 | 25.66 |
| 18.56 | 24.87 | 25.22 | 25.36 | 25.64 | 25.89 | 26.10 |
| 19.04 | 24.38 | 24.61 | 24.87 | 25.20 | 25.37 | 25.66 |
| 19.56 | 24.95 | 25.27 | 25.44 | 25.63 | 25.59 | 25.91 |
| 20.12 | 24.75 | 24.92 | 25.23 | 25.50 | 25.62 | 26.02 |
| 20.72 | 25.26 | 25.55 | 25.80 | 26.11 | 26.23 | 26.39 |
| 21.37 | 24.85 | 25.17 | 25.38 | 25.71 | 25.78 | 26.09 |
| 22.08 | 25.43 | 25.74 | 26.01 | 26.27 | 26.42 | 26.69 |
| 22.84 | 25.42 | 25.61 | 25.85 | 26.03 | 26.13 | 26.17 |
| 23.65 | 24.54 | 24.88 | 25.19 | 25.42 | 25.60 | 25.89 |
| 24.54 | 24.45 | 24.83 | 24.95 | 25.25 | 25.42 | 25.76 |
| 25.49 | 24.99 | 25.30 | 25.48 | 25.69 | 25.80 | 25.97 |
| 26.51 | 24.01 | 24.30 | 24.44 | 24.65 | 24.78 | 25.17 |
| 27.62 | 24.59 | 24.79 | 25.00 | 25.20 | 25.35 | 25.67 |
| 28.81 | 25.00 | 25.26 | 25.47 | 25.61 | 25.62 | 25.80 |
| 30.10 | 24.10 | 24.27 | 24.54 | 24.75 | 25.00 | 25.23 |
| 31.49 | 24.99 | 25.25 | 25.43 | 25.57 | 25.65 | 25.79 |
| 32.98 | 24.42 | 24.70 | 24.85 | 25.04 | 25.11 | 25.34 |
| 34.60 | 24.55 | 24.74 | 24.94 | 25.20 | 25.35 | 25.45 |
| 36.34 | 24.23 | 24.39 | 24.51 | 24.72 | 24.83 | 25.22 |
| 38.21 | 24.80 | 25.09 | 25.17 | 25.32 | 25.39 | 25.63 |
| 40.24 | 24.64 | 24.83 | 25.03 | 25.31 | 25.39 | 25.55 |
| 42.42 | 24.10 | 24.28 | 24.51 | 24.76 | 24.93 | 25.04 |

|         |       |       |       |       |       |       |
|---------|-------|-------|-------|-------|-------|-------|
| 44.78   | 24.06 | 24.25 | 24.49 | 24.62 | 24.56 | 24.76 |
| 47.32   | 24.13 | 24.33 | 24.50 | 24.59 | 24.66 | 24.68 |
| 50.06   | 24.37 | 24.63 | 24.75 | 24.89 | 24.98 | 25.08 |
| 53.01   | 24.06 | 24.29 | 24.45 | 24.57 | 24.63 | 24.85 |
| 56.20   | 24.06 | 24.21 | 24.47 | 24.55 | 24.75 | 24.85 |
| 59.64   | 24.02 | 24.20 | 24.35 | 24.45 | 24.57 | 24.70 |
| 63.34   | 23.77 | 23.96 | 24.09 | 24.20 | 24.27 | 24.34 |
| 67.34   | 23.53 | 23.82 | 23.82 | 23.95 | 24.04 | 24.12 |
| 71.65   | 23.80 | 23.99 | 24.11 | 24.28 | 24.37 | 24.60 |
| 76.30   | 23.97 | 24.16 | 24.23 | 24.40 | 24.35 | 24.53 |
| 81.32   | 24.09 | 24.17 | 24.35 | 24.35 | 24.49 | 24.76 |
| 86.73   | 23.78 | 23.91 | 24.08 | 24.23 | 24.22 | 24.50 |
| 92.56   | 23.96 | 24.00 | 24.04 | 23.99 | 24.03 | 24.13 |
| 98.85   | 23.42 | 23.61 | 23.68 | 23.84 | 23.88 | 24.02 |
| 105.64  | 23.92 | 24.02 | 24.02 | 23.91 | 23.94 | 23.91 |
| 112.96  | 23.69 | 23.82 | 23.85 | 23.88 | 23.95 | 24.02 |
| 120.85  | 23.27 | 23.31 | 23.45 | 23.51 | 23.44 | 23.52 |
| 129.36  | 24.10 | 24.18 | 24.25 | 24.13 | 24.15 | 24.19 |
| 138.55  | 23.79 | 23.82 | 23.85 | 23.88 | 23.88 | 24.00 |
| 148.45  | 23.42 | 23.53 | 23.60 | 23.66 | 23.66 | 23.81 |
| 159.13  | 23.49 | 23.53 | 23.48 | 23.37 | 23.26 | 23.33 |
| 170.65  | 23.08 | 23.13 | 23.07 | 23.14 | 23.07 | 23.25 |
| 183.07  | 23.13 | 23.15 | 23.23 | 23.23 | 23.12 | 23.26 |
| 196.47  | 22.86 | 22.83 | 22.79 | 22.80 | 22.65 | 22.66 |
| 210.91  | 22.70 | 22.82 | 22.71 | 22.67 | 22.55 | 22.57 |
| 226.50  | 22.81 | 22.85 | 22.86 | 22.67 | 22.69 | 22.56 |
| 243.31  | 22.59 | 22.60 | 22.54 | 22.40 | 22.28 | 22.17 |
| 261.43  | 22.88 | 22.81 | 22.72 | 22.59 | 22.57 | 22.55 |
| 280.98  | 22.68 | 22.78 | 22.67 | 22.45 | 22.41 | 22.27 |
| 302.07  | 22.21 | 22.20 | 22.12 | 21.92 | 21.79 | 21.75 |
| 324.81  | 22.20 | 22.13 | 22.03 | 22.05 | 21.86 | 21.89 |
| 349.33  | 21.98 | 21.89 | 21.80 | 21.61 | 21.47 | 21.33 |
| 375.79  | 22.24 | 22.18 | 22.07 | 21.90 | 21.71 | 21.71 |
| 404.31  | 21.97 | 21.91 | 21.89 | 21.73 | 21.42 | 21.59 |
| 435.08  | 21.83 | 21.75 | 21.70 | 21.54 | 21.50 | 21.51 |
| 468.27  | 21.77 | 21.68 | 21.49 | 21.31 | 21.08 | 21.05 |
| 504.06  | 21.70 | 21.60 | 21.51 | 21.31 | 21.24 | 21.12 |
| 542.66  | 21.48 | 21.31 | 21.12 | 20.95 | 20.70 | 20.53 |
| 584.29  | 21.57 | 21.55 | 21.33 | 21.19 | 21.13 | 21.07 |
| 629.18  | 21.65 | 21.50 | 21.38 | 21.19 | 20.95 | 20.83 |
| 677.61  | 21.67 | 21.48 | 21.33 | 21.15 | 20.88 | 20.82 |
| 729.83  | 20.84 | 20.74 | 20.54 | 20.31 | 20.14 | 20.07 |
| 786.16  | 21.46 | 21.40 | 21.24 | 21.07 | 20.80 | 20.72 |
| 846.90  | 20.69 | 20.55 | 20.42 | 20.18 | 19.93 | 19.80 |
| 912.42  | 20.43 | 20.29 | 20.16 | 19.95 | 19.72 | 19.64 |
| 983.08  | 21.10 | 20.81 | 20.64 | 20.36 | 20.09 | 19.93 |
| 1059.29 | 20.97 | 20.81 | 20.55 | 20.36 | 20.19 | 20.06 |
| 1141.48 | 20.35 | 20.22 | 20.07 | 19.85 | 19.68 | 19.61 |
| 1230.13 | 20.82 | 20.62 | 20.53 | 20.32 | 20.21 | 20.06 |
| 1325.73 | 20.98 | 20.76 | 20.58 | 20.30 | 19.98 | 19.76 |

|         |       |       |       |       |       |       |
|---------|-------|-------|-------|-------|-------|-------|
| 1428.84 | 20.54 | 20.34 | 20.23 | 19.95 | 19.77 | 19.66 |
| 1540.05 | 20.71 | 20.50 | 20.39 | 20.18 | 19.89 | 19.74 |
| 1659.99 | 20.46 | 20.34 | 20.16 | 19.96 | 19.82 | 19.75 |
| 1789.34 | 20.09 | 19.94 | 19.77 | 19.63 | 19.41 | 19.26 |
| 1928.85 | 20.25 | 20.02 | 19.83 | 19.59 | 19.37 | 19.27 |
| 2079.31 | 20.26 | 20.07 | 19.78 | 19.73 | 19.45 | 19.45 |
| 2241.59 | 20.07 | 19.87 | 19.67 | 19.52 | 19.29 | 19.22 |
| 2416.60 | 20.38 | 20.19 | 20.14 | 19.91 | 19.69 | 19.57 |
| 2605.36 | 20.23 | 20.07 | 19.93 | 19.68 | 19.57 | 19.42 |
| 2808.94 | 19.61 | 19.39 | 19.27 | 19.08 | 18.94 | 18.76 |
| 3028.50 | 19.14 | 18.94 | 18.76 | 18.53 | 18.21 | 18.27 |
| 3265.30 | 19.72 | 19.56 | 19.42 | 19.24 | 19.19 | 18.92 |
| 3520.69 | 19.61 | 19.39 | 19.15 | 18.91 | 18.57 | 18.47 |
| 3796.13 | 19.11 | 19.04 | 18.85 | 18.71 | 18.54 | 18.39 |

**Table S8.** Raw data of fs-TA signals of A-RC-A collected under VIS ( $\lambda_{\text{ex}} = 513 \text{ nm}$ ) excitation in the  $\lambda_{\text{pr}} = 318\text{--}670 \text{ nm}$  regime, the unit of  $\Delta A$  in the table is mOD..

| Wavelength (nm) \ Time (ps) | 318.42 | 319.85 | 321.27 | 322.70 | 324.12 | 325.54 | 326.97 | 328.39 | 329.82 | 331.24 | 332.67 |
|-----------------------------|--------|--------|--------|--------|--------|--------|--------|--------|--------|--------|--------|
| -2.74                       | -0.57  | 0.14   | 0.08   | -0.76  | 0.32   | -1.01  | 1.54   | -0.66  | 0.38   | -0.50  | 0.19   |
| -2.24                       | -0.50  | 0.44   | -1.64  | 0.48   | -0.92  | -0.82  | -1.05  | -0.34  | -0.82  | 1.02   | -0.47  |
| -1.74                       | 1.18   | -0.38  | 0.41   | -0.09  | -1.11  | 0.95   | -0.22  | 0.94   | -0.71  | -1.52  | 0.63   |
| -1.24                       | -0.34  | -1.29  | -0.26  | 1.68   | 0.48   | -0.16  | -0.65  | 0.03   | 0.42   | 1.19   | -0.51  |
| -0.74                       | 1.47   | 1.74   | 0.76   | -0.99  | -0.20  | -0.16  | 0.81   | 0.95   | 0.98   | -0.52  | 0.78   |
| -0.24                       | -2.15  | -0.29  | 0.99   | -1.48  | 0.10   | 0.10   | 0.61   | 0.63   | -0.74  | -0.72  | -0.56  |
| -0.14                       | 0.72   | -0.28  | 0.18   | -0.03  | 1.00   | 1.04   | -0.44  | -0.13  | 1.26   | 1.18   | 0.23   |
| -0.04                       | 0.19   | -0.07  | -0.53  | 1.19   | 0.32   | 0.06   | -0.60  | -1.41  | -0.78  | -0.13  | -0.27  |
| 0.06                        | -1.27  | -0.99  | -0.69  | -0.71  | -0.73  | -1.07  | 0.98   | 1.19   | 0.17   | -0.37  | 1.73   |
| 0.16                        | -0.48  | -1.06  | -0.62  | 0.08   | 0.22   | 0.78   | 0.10   | 1.08   | 0.79   | -0.82  | 2.19   |
| 0.26                        | -0.22  | -0.02  | -0.36  | 2.01   | -1.39  | 0.94   | 1.32   | -0.74  | 0.34   | -0.81  | -0.52  |
| 0.31                        | 1.90   | 0.50   | -0.52  | -1.46  | -3.06  | 0.75   | -0.13  | 0.68   | 0.43   | -1.45  | 0.55   |
| 0.36                        | -1.76  | 0.18   | 0.41   | 0.01   | 0.28   | 0.76   | -3.76  | -4.32  | -4.31  | -3.03  | -0.83  |
| 0.41                        | 2.46   | 1.03   | -0.85  | 2.39   | 1.83   | 5.46   | 5.85   | 3.81   | -2.32  | -8.97  | -14.76 |
| 0.46                        | -0.65  | -0.72  | 0.80   | 0.08   | 0.77   | 4.81   | 7.64   | 15.38  | 21.10  | 31.34  | 36.27  |
| 0.51                        | 0.15   | 0.37   | -0.36  | -1.52  | -5.26  | -5.17  | -5.56  | -1.13  | 2.81   | 16.64  | 42.17  |
| 0.56                        | -1.34  | -0.13  | 0.26   | -1.53  | 0.75   | -1.01  | -4.20  | -9.24  | -19.90 | -30.95 | -25.30 |
| 0.61                        | -1.00  | 0.28   | -0.60  | -0.60  | 0.44   | 1.11   | 1.54   | 0.64   | -1.36  | -9.10  | -25.45 |
| 0.66                        | 0.62   | -0.99  | 0.25   | -0.77  | -0.24  | 0.52   | 0.54   | 0.99   | 1.97   | 0.50   | 2.83   |
| 0.71                        | -0.37  | -1.43  | -0.36  | -0.04  | 0.64   | 1.91   | -0.48  | 1.44   | 0.11   | 1.62   | 2.15   |
| 0.76                        | 0.33   | 0.20   | 1.96   | -1.36  | -1.80  | 1.09   | 0.77   | 2.40   | 0.32   | 0.15   | 1.58   |
| 0.81                        | -0.67  | 2.11   | 0.50   | 0.99   | -0.30  | -1.06  | 0.59   | 0.53   | 0.80   | 0.10   | 0.25   |
| 0.86                        | -1.60  | 0.91   | -0.92  | 0.01   | 0.58   | -0.17  | 0.19   | -0.08  | 0.65   | 0.07   | 1.10   |
| 0.91                        | 0.83   | 1.28   | -0.52  | -1.21  | 0.18   | 0.23   | 0.57   | 2.22   | 1.53   | -0.30  | 1.94   |
| 0.96                        | -0.38  | -0.29  | -0.45  | -0.36  | -0.94  | -2.27  | 1.62   | 1.35   | -0.95  | 0.58   | 0.40   |
| 1.01                        | -0.52  | 1.61   | -0.98  | 1.02   | -0.83  | 1.41   | -0.23  | 2.39   | 2.36   | 0.34   | 0.67   |
| 1.06                        | 0.34   | -0.37  | 0.61   | 0.93   | -0.08  | 1.83   | 0.38   | 0.86   | 0.86   | 1.16   | 2.45   |
| 1.11                        | -1.78  | -1.75  | -1.07  | 0.22   | -0.38  | 1.59   | 0.75   | 1.75   | 1.05   | 0.59   | 0.93   |
| 1.16                        | -0.69  | 1.43   | -0.63  | -0.94  | -0.32  | 0.10   | 2.09   | 0.38   | 0.61   | -0.21  | 0.87   |

|      |       |       |       |       |       |       |       |       |       |       |       |
|------|-------|-------|-------|-------|-------|-------|-------|-------|-------|-------|-------|
| 1.21 | -0.85 | 2.34  | 1.39  | -0.67 | 0.30  | 1.64  | 2.84  | 1.55  | -0.25 | 0.01  | 1.18  |
| 1.26 | -0.26 | -0.68 | 0.25  | -0.39 | 0.85  | 0.34  | -0.14 | 1.33  | 1.80  | -0.05 | 1.95  |
| 1.31 | 0.68  | -0.55 | 2.26  | -0.43 | -0.37 | -0.06 | 0.26  | 1.57  | 0.77  | 0.53  | 0.78  |
| 1.36 | 1.91  | -0.07 | 0.92  | 0.18  | -0.10 | 1.58  | 0.71  | 1.68  | 0.09  | 0.04  | 1.62  |
| 1.41 | -2.12 | 0.61  | -0.29 | -0.63 | -0.99 | 1.35  | -1.40 | 1.00  | 1.29  | -0.56 | 1.40  |
| 1.46 | 3.25  | 0.97  | 1.29  | 0.80  | -0.12 | 0.33  | 0.14  | 0.28  | 0.93  | -0.83 | 0.23  |
| 1.51 | 1.11  | 1.37  | -0.45 | -1.02 | 0.34  | 0.76  | 0.25  | 0.20  | 1.57  | -1.15 | 1.25  |
| 1.56 | -1.61 | 2.05  | 0.74  | -0.63 | 1.83  | 1.05  | -0.94 | 2.02  | -0.25 | 1.95  | 2.36  |
| 1.61 | 0.25  | 1.16  | -0.78 | -0.09 | 0.33  | 0.73  | 1.17  | 1.95  | 0.40  | 0.11  | 0.77  |
| 1.66 | 1.38  | -1.02 | -2.42 | 0.58  | -0.62 | -1.80 | -0.40 | 0.43  | -0.24 | -0.72 | 1.73  |
| 1.71 | 1.53  | 0.84  | 2.06  | 0.45  | -1.28 | 1.18  | 0.04  | 0.26  | 0.45  | 0.82  | 0.60  |
| 1.76 | -0.21 | 0.01  | 1.29  | -1.52 | 1.53  | 0.46  | 0.08  | 0.22  | 1.27  | 0.76  | 0.96  |
| 1.81 | -0.15 | -0.82 | 0.49  | -1.35 | 0.48  | -1.07 | 0.58  | 1.41  | -0.67 | -0.38 | 0.62  |
| 1.86 | 1.31  | 0.65  | -1.19 | 1.35  | -1.37 | -0.20 | 0.12  | 2.89  | 1.02  | 1.02  | 0.63  |
| 1.91 | 0.25  | 2.39  | -0.51 | 0.33  | -0.07 | 0.30  | 1.03  | 1.59  | 0.86  | 0.85  | 1.79  |
| 1.96 | -0.36 | 0.11  | -0.10 | -0.57 | 0.46  | 2.00  | -0.29 | 0.34  | 2.10  | -0.57 | 0.57  |
| 2.01 | 0.32  | 1.09  | -1.30 | -0.81 | -0.58 | -0.20 | -0.84 | 0.19  | 0.21  | 0.33  | 0.50  |
| 2.06 | 0.13  | 0.31  | 0.72  | 1.39  | 0.74  | 0.72  | 0.61  | 0.45  | 0.58  | 0.63  | 1.63  |
| 2.11 | -0.50 | -2.31 | 2.22  | -0.23 | -2.88 | 0.26  | 2.23  | -1.84 | -0.44 | 1.43  | 1.21  |
| 2.16 | -1.48 | -0.18 | 1.75  | -0.94 | -0.06 | 1.84  | -0.35 | -0.53 | 0.62  | 1.18  | 0.71  |
| 2.21 | -0.69 | 2.13  | -1.60 | 0.84  | 0.43  | -0.75 | 0.25  | 2.16  | 1.20  | -1.17 | 1.31  |
| 2.26 | 0.90  | -0.28 | 1.24  | 0.65  | 0.07  | 0.14  | 0.65  | 2.57  | 0.13  | -0.11 | 1.38  |
| 2.31 | 1.00  | 1.24  | -0.93 | -0.86 | 0.34  | -0.26 | 0.46  | 1.39  | -0.43 | -1.76 | 0.74  |
| 2.36 | -0.49 | 2.25  | -2.95 | -0.53 | 2.41  | 0.58  | -1.83 | 1.17  | 2.76  | -0.40 | -0.14 |
| 2.41 | 0.71  | 1.75  | 0.32  | 1.02  | -2.67 | 0.47  | 0.97  | -0.68 | 0.51  | -0.16 | 1.22  |
| 2.46 | 0.79  | -0.89 | 0.64  | 1.73  | -0.41 | -1.72 | 3.00  | 1.81  | 0.06  | 0.07  | 1.85  |
| 2.51 | -0.88 | 1.91  | 0.42  | -2.66 | 1.87  | 2.79  | 0.05  | 0.24  | 0.85  | -0.07 | -1.85 |
| 2.56 | -0.60 | 3.66  | 0.28  | -2.37 | 1.18  | 1.22  | -2.07 | -0.82 | 1.07  | -0.17 | -0.05 |
| 2.61 | -0.13 | -0.07 | 0.58  | -0.25 | -1.80 | -0.18 | -1.18 | 0.69  | 0.18  | 2.28  | 0.33  |
| 2.66 | -0.58 | -2.06 | 1.87  | -0.39 | -0.38 | 1.60  | -0.03 | 1.33  | -0.36 | -0.78 | 0.19  |
| 2.71 | 2.07  | -1.36 | -0.37 | 0.19  | -0.68 | -0.86 | 0.79  | 3.02  | -0.15 | -1.28 | 2.02  |
| 2.76 | -0.30 | -2.11 | 0.70  | 1.58  | -1.49 | 0.89  | 1.20  | 1.49  | -0.76 | 0.76  | 0.82  |
| 2.81 | 0.92  | 0.16  | 0.65  | 0.09  | 0.89  | 1.40  | 3.43  | 2.96  | -2.32 | -0.76 | 2.68  |
| 2.86 | 2.28  | 0.58  | -0.37 | 1.26  | -0.30 | -0.68 | -0.35 | 0.01  | 1.36  | -0.53 | 1.37  |
| 2.91 | 1.29  | 0.70  | -1.44 | -0.51 | 0.53  | 0.45  | -0.19 | 2.54  | 2.35  | -1.25 | 1.01  |
| 2.96 | -1.17 | 2.72  | -1.10 | -1.51 | -0.18 | 1.75  | -0.37 | 0.37  | 0.99  | 0.41  | 0.08  |
| 3.01 | 1.19  | 0.38  | -0.26 | 0.02  | -1.34 | -0.29 | -0.27 | 2.07  | -0.63 | -0.51 | 0.29  |
| 3.06 | 0.11  | 0.98  | 0.82  | -1.34 | -0.96 | -0.29 | 0.40  | 0.52  | 1.31  | -1.25 | 1.20  |
| 3.11 | 0.48  | 1.29  | 1.62  | -0.56 | 0.37  | -0.29 | 0.14  | -0.07 | -0.54 | -0.72 | 1.90  |
| 3.16 | 1.34  | -0.24 | -1.39 | 0.02  | 1.39  | -0.91 | 0.81  | 1.34  | 0.97  | -0.26 | 0.40  |
| 3.21 | -0.22 | -1.83 | 1.04  | -0.06 | -1.37 | 0.76  | 1.24  | 1.44  | 0.71  | 0.32  | 1.80  |
| 3.26 | 0.54  | -1.56 | -0.63 | 1.34  | 0.45  | 0.39  | 0.70  | 1.39  | 1.73  | 0.02  | 1.47  |
| 3.31 | 1.12  | 1.91  | 0.29  | 1.03  | -0.54 | 1.58  | 0.82  | 1.03  | 0.27  | 0.24  | -0.11 |
| 3.36 | 0.21  | 0.87  | 0.48  | -1.18 | -0.35 | 0.73  | 0.52  | -1.09 | 0.72  | 0.57  | -0.93 |
| 3.41 | 0.76  | -1.24 | 0.77  | -1.06 | -1.81 | 1.33  | -0.03 | 0.36  | 0.94  | -0.46 | 0.49  |
| 3.46 | -1.85 | 0.01  | 0.31  | 0.94  | 0.55  | 1.34  | 1.19  | 0.39  | 1.02  | -0.63 | -0.61 |
| 3.51 | -0.12 | 3.06  | 0.09  | 0.20  | -2.65 | 1.18  | 0.81  | 2.50  | 1.28  | 0.01  | 0.15  |
| 3.56 | 0.64  | -0.73 | -0.93 | -2.67 | 0.32  | 2.03  | -1.02 | 2.26  | 0.21  | -0.11 | 0.71  |
| 3.61 | 1.62  | -1.51 | -1.13 | 2.68  | 1.77  | -2.37 | 2.67  | 0.93  | -1.26 | -0.60 | 1.38  |
| 3.66 | 0.07  | 0.69  | -0.04 | -1.74 | -1.52 | -0.49 | 1.34  | 1.33  | -0.65 | -1.12 | 1.01  |

|      |       |       |       |       |       |       |       |       |       |       |       |
|------|-------|-------|-------|-------|-------|-------|-------|-------|-------|-------|-------|
| 3.71 | -0.16 | -1.45 | -0.13 | -0.70 | -0.37 | 2.40  | -2.50 | -0.66 | 1.81  | 0.55  | 1.53  |
| 3.76 | 0.65  | -0.51 | -0.24 | -1.84 | 1.02  | 0.15  | 1.26  | 0.54  | 0.45  | -0.03 | 1.11  |
| 3.81 | -3.87 | 1.10  | 1.21  | -1.41 | -1.33 | 2.01  | -0.14 | -0.84 | 2.50  | 0.44  | -0.32 |
| 3.86 | -0.26 | 0.62  | -0.63 | -1.40 | 0.41  | -0.23 | 1.94  | 0.77  | 1.19  | 1.40  | 0.88  |
| 3.91 | -0.79 | -0.19 | 0.68  | -0.11 | -0.92 | 0.50  | 0.26  | 0.95  | -0.21 | -0.53 | -0.34 |
| 3.96 | -0.45 | 2.89  | -0.41 | -3.76 | 3.29  | 1.03  | -1.93 | 2.53  | 3.91  | -1.46 | -0.94 |
| 4.01 | 0.18  | 0.35  | 0.30  | 1.57  | -1.71 | -0.17 | -1.36 | 0.60  | -0.03 | -0.13 | 0.44  |
| 4.06 | 1.34  | 0.77  | -0.16 | -0.83 | -0.53 | -0.24 | -1.76 | 0.70  | 0.98  | 0.12  | -0.48 |
| 4.11 | -1.62 | 0.06  | 0.10  | -1.40 | 1.63  | 2.22  | -0.62 | 0.62  | 1.39  | -0.99 | 0.25  |
| 4.16 | -2.03 | -1.56 | 2.10  | -0.61 | -0.27 | 2.26  | 1.66  | -2.00 | 1.64  | 3.04  | 0.13  |
| 4.21 | -0.79 | -0.45 | 1.77  | -0.79 | -1.12 | -0.39 | 0.22  | 0.57  | -0.58 | -1.01 | 0.78  |
| 4.26 | 1.48  | -1.71 | 1.13  | 2.10  | -0.95 | 0.99  | 0.18  | -0.08 | 1.88  | 0.73  | 0.96  |
| 4.31 | 0.21  | 1.09  | -1.32 | 0.09  | 0.58  | 0.47  | 1.43  | 0.96  | 0.85  | 0.22  | 1.17  |
| 4.36 | -2.15 | 0.10  | -1.26 | -0.18 | 0.69  | 0.85  | -0.52 | 0.50  | 0.95  | -0.06 | 0.33  |
| 4.41 | -0.59 | -0.20 | 0.28  | -0.49 | 1.12  | -0.53 | -0.40 | 1.93  | 1.33  | -0.51 | -0.91 |
| 4.46 | -0.23 | -0.70 | 0.10  | 0.24  | 1.15  | -1.23 | -0.65 | -1.30 | 1.51  | 0.59  | 0.74  |
| 4.51 | 0.42  | -0.87 | -0.37 | -1.58 | 1.05  | -1.00 | 0.01  | 1.14  | 0.01  | 0.43  | 0.96  |
| 4.56 | 0.05  | 1.19  | 0.90  | -0.70 | -0.09 | 1.35  | 0.42  | 1.21  | 0.58  | -0.34 | -0.21 |
| 4.61 | -0.84 | 0.22  | -1.92 | -1.55 | 2.19  | 1.70  | 1.12  | 1.03  | 1.32  | -0.45 | -0.09 |
| 4.66 | -1.19 | -1.22 | -0.33 | 0.80  | -0.87 | 0.40  | 0.50  | -0.49 | 0.29  | 0.63  | -0.06 |
| 4.71 | -0.83 | -0.58 | -1.50 | -0.82 | -0.04 | -0.11 | 1.12  | 0.67  | 1.30  | -0.21 | -0.26 |
| 4.76 | -1.40 | 2.74  | -0.96 | -0.25 | 0.92  | 0.51  | 0.76  | 1.28  | 1.57  | 1.16  | 1.03  |
| 4.81 | 1.71  | -0.49 | -0.53 | -0.73 | 1.68  | 1.00  | 1.91  | 2.89  | 0.78  | -0.63 | 2.17  |
| 4.86 | 0.14  | 2.26  | 1.19  | 0.55  | -0.46 | 0.56  | -0.05 | 0.24  | 1.86  | -0.87 | 0.78  |
| 4.91 | 0.22  | 0.28  | 1.13  | 0.37  | -0.37 | -0.80 | -0.08 | 2.30  | -0.61 | 0.10  | 0.37  |
| 4.96 | -0.71 | 1.37  | -0.56 | -1.01 | 0.11  | 0.77  | 0.43  | 0.56  | 1.01  | 0.28  | 0.28  |
| 5.01 | -0.41 | -0.98 | 1.30  | -0.17 | 0.05  | 0.50  | 1.04  | 1.19  | -0.96 | 0.22  | 2.57  |
| 5.06 | -0.13 | -0.17 | -1.25 | 0.01  | 0.02  | 0.06  | -0.11 | 1.58  | 0.25  | -2.05 | 0.55  |
| 5.11 | 0.11  | 1.21  | 0.12  | -0.24 | 0.92  | 0.90  | -0.50 | -0.90 | 1.56  | -0.44 | -0.04 |
| 5.16 | 1.06  | 1.10  | 0.21  | 1.63  | 0.43  | -1.70 | 0.44  | 0.43  | 0.47  | -0.79 | 0.83  |
| 5.21 | -1.29 | 1.62  | -0.96 | -0.09 | -0.97 | -0.08 | 0.31  | 0.42  | 1.42  | 0.05  | 0.51  |
| 5.26 | 0.67  | -1.94 | 0.04  | 1.08  | -0.28 | -0.73 | 1.07  | 2.71  | -0.79 | -0.11 | 0.52  |
| 5.31 | -0.43 | -0.63 | -0.61 | -0.04 | 0.39  | 1.10  | 0.41  | -1.58 | 0.51  | -0.59 | -0.71 |
| 5.38 | -0.06 | 1.69  | 0.04  | 1.04  | 1.70  | 1.61  | 0.02  | 0.80  | 0.11  | 0.76  | -0.17 |
| 5.45 | 1.99  | -0.63 | 1.09  | 0.49  | -0.36 | 0.22  | 1.51  | -0.16 | 0.24  | 0.11  | 0.62  |
| 5.53 | 0.87  | 1.38  | -1.39 | -0.98 | 1.06  | 0.49  | 0.55  | 0.45  | 0.15  | -0.72 | 0.67  |
| 5.61 | -0.44 | -0.49 | -1.16 | 0.94  | -1.64 | 1.90  | 1.79  | 0.44  | 1.17  | 0.40  | 1.45  |
| 5.70 | 0.25  | 1.64  | 0.57  | -1.37 | -0.08 | 0.89  | -0.23 | -0.57 | 1.99  | -1.22 | 0.59  |
| 5.80 | 0.07  | 0.14  | 1.34  | 0.73  | 0.51  | 0.36  | -1.24 | 1.28  | 1.10  | 0.12  | -0.48 |
| 5.90 | 0.43  | -0.35 | -0.47 | 1.09  | -2.11 | -0.52 | 1.91  | 1.19  | -0.56 | 1.07  | 1.94  |
| 6.01 | 0.32  | 0.03  | -1.01 | 0.15  | -0.09 | -0.10 | 0.06  | 0.84  | 0.27  | -0.64 | 1.17  |
| 6.13 | 1.66  | 0.54  | -0.29 | 0.57  | -0.51 | 0.85  | 0.67  | 0.81  | 0.02  | 0.44  | 0.29  |
| 6.25 | -1.01 | 0.62  | -1.47 | 0.06  | -0.40 | -0.03 | -0.39 | 1.47  | 0.23  | -0.69 | 0.32  |
| 6.39 | -0.24 | 1.82  | -0.20 | 0.68  | -1.08 | 0.34  | 0.12  | 0.80  | 1.32  | -2.40 | 0.51  |
| 6.53 | 0.68  | 1.52  | -0.99 | 0.50  | -1.33 | 1.81  | -0.33 | 0.75  | 0.83  | -0.58 | 0.10  |
| 6.69 | 0.89  | 0.59  | 0.34  | -0.20 | -0.93 | -0.72 | 1.61  | -0.46 | 0.47  | 0.09  | 1.55  |
| 6.85 | -0.65 | 1.11  | -0.03 | 1.48  | -0.35 | -0.26 | 0.54  | 2.14  | -1.54 | -0.07 | 0.57  |
| 7.03 | 0.50  | 2.48  | 0.27  | 1.00  | 0.09  | 0.29  | -0.42 | 0.98  | 1.39  | 0.21  | -0.57 |
| 7.21 | 1.07  | 0.66  | -0.50 | -0.28 | -2.32 | 1.12  | 0.70  | 2.07  | -1.06 | -1.35 | -0.08 |
| 7.41 | -1.61 | 1.83  | -1.09 | -0.27 | -1.62 | 1.73  | 0.66  | 2.19  | 1.83  | -1.58 | -0.19 |

|       |       |       |       |       |       |       |       |       |       |       |       |
|-------|-------|-------|-------|-------|-------|-------|-------|-------|-------|-------|-------|
| 7.63  | 1.01  | 0.81  | 1.07  | -1.37 | 1.32  | 1.10  | 2.38  | 0.36  | 0.16  | 0.38  | 1.08  |
| 7.86  | 0.07  | -2.00 | 1.16  | 0.28  | -1.37 | 1.07  | 2.15  | 0.13  | 1.14  | -0.22 | 1.78  |
| 8.10  | 0.47  | 0.63  | 0.50  | -1.98 | -1.63 | 1.16  | -0.03 | 0.47  | 0.95  | 1.79  | 0.30  |
| 8.36  | 0.42  | 0.09  | -0.44 | 0.99  | -0.18 | 1.81  | -0.76 | 1.68  | 0.59  | 0.50  | 0.08  |
| 8.64  | 0.19  | -1.01 | -0.71 | 0.84  | 0.67  | -1.14 | 0.91  | 1.14  | 0.21  | 0.57  | -0.15 |
| 8.94  | -0.57 | -0.25 | -0.92 | 1.48  | 1.99  | -1.47 | 1.67  | 0.68  | -0.07 | 0.64  | 0.87  |
| 9.26  | 0.43  | -0.46 | -0.98 | 0.76  | -0.01 | -1.78 | 1.07  | 1.30  | 0.12  | 0.31  | 2.02  |
| 9.60  | -0.15 | -0.46 | 1.29  | 1.63  | 0.00  | -1.68 | 1.33  | -0.60 | 0.23  | 1.70  | -0.03 |
| 9.97  | -0.78 | -0.83 | -0.30 | 0.07  | -1.61 | 1.75  | 0.52  | 0.40  | 0.95  | 1.38  | -0.37 |
| 10.36 | -0.27 | 2.07  | 0.50  | -1.91 | -0.46 | 0.79  | -0.39 | 2.33  | -0.24 | -0.67 | 0.64  |
| 10.77 | -0.87 | -0.32 | 0.75  | 0.29  | 0.23  | -0.25 | 0.39  | 0.52  | 1.03  | -0.30 | 0.71  |
| 11.22 | 0.30  | 0.43  | -1.59 | -0.13 | -0.46 | 0.36  | 1.05  | 0.77  | 0.39  | -0.60 | 1.23  |
| 11.70 | -0.30 | 0.27  | -0.08 | -0.49 | 0.76  | 0.04  | 0.44  | 0.10  | 0.00  | -1.38 | 0.68  |
| 12.21 | -1.29 | -1.87 | 1.77  | -0.12 | -2.11 | 1.66  | 1.61  | -0.62 | -1.43 | 1.94  | 0.20  |
| 12.75 | 1.84  | -0.43 | -1.20 | 1.16  | -0.61 | -0.37 | -0.44 | 0.70  | -0.31 | -0.41 | 2.28  |
| 13.33 | -0.39 | -1.39 | 0.33  | 0.40  | 0.03  | 0.17  | 0.00  | 1.39  | 1.59  | 0.61  | 0.06  |
| 13.95 | 0.56  | 1.32  | -2.04 | -0.75 | -0.23 | -0.94 | 1.02  | 1.58  | 0.46  | -0.32 | -1.45 |
| 14.62 | 2.85  | -0.54 | 0.03  | -1.28 | 0.83  | -0.66 | 0.20  | 0.54  | -0.52 | 1.11  | 0.06  |
| 15.33 | -0.21 | -0.37 | 0.96  | 0.01  | 0.08  | 1.52  | 0.18  | 0.71  | 0.79  | -0.91 | 0.34  |
| 16.09 | 0.20  | 0.26  | -0.59 | 0.26  | -1.08 | -1.45 | -1.07 | -0.10 | 0.15  | -1.07 | 1.35  |
| 16.90 | 0.62  | -0.85 | 1.05  | -0.77 | 0.08  | -0.21 | -0.39 | 1.85  | 1.36  | 0.47  | -0.16 |
| 17.77 | 1.14  | -0.30 | 0.03  | 0.76  | -0.51 | 0.66  | 1.57  | 0.75  | -0.21 | -2.33 | 1.02  |
| 18.70 | 1.63  | 0.76  | -0.01 | 1.37  | -0.28 | -1.34 | 1.80  | -0.67 | 0.03  | -0.06 | 0.56  |
| 19.69 | -1.10 | 0.55  | -0.96 | 0.23  | 0.63  | -0.51 | 0.17  | -0.78 | -0.45 | 0.33  | 1.68  |
| 20.75 | 0.62  | -0.04 | 0.65  | 1.11  | 0.96  | 0.47  | -0.17 | -0.17 | 1.90  | 0.04  | -0.17 |
| 21.89 | 0.92  | 0.59  | 1.46  | 0.19  | -0.25 | 0.41  | 1.56  | 0.83  | -0.95 | -1.19 | 0.52  |
| 23.10 | 1.15  | 0.74  | 0.91  | -0.69 | -1.38 | -2.05 | -1.47 | -0.29 | 1.75  | -1.83 | 0.47  |
| 24.39 | -0.34 | -0.51 | 0.57  | -0.46 | 0.77  | 1.39  | -0.73 | 0.40  | 1.05  | -0.42 | -1.61 |
| 25.78 | 0.92  | -1.31 | 0.58  | -0.48 | -0.28 | -0.80 | 1.11  | 1.36  | 0.99  | -1.08 | 0.16  |
| 27.26 | -1.32 | -0.86 | 0.31  | 0.18  | -1.39 | 0.63  | -0.30 | 1.74  | 1.08  | 0.73  | 1.41  |
| 28.84 | -1.34 | -0.42 | 1.97  | -0.24 | 0.27  | 0.06  | -1.18 | -0.72 | 0.90  | -0.79 | 1.76  |
| 30.53 | 0.06  | -0.48 | -2.58 | -1.12 | 0.75  | 1.75  | 2.79  | -0.15 | -0.02 | -0.18 | 0.18  |
| 32.34 | 0.00  | -0.33 | 0.21  | 0.18  | 0.10  | 1.13  | 0.45  | 1.64  | -0.18 | 1.63  | -0.28 |
| 34.27 | 0.10  | 2.50  | -0.91 | -0.01 | -0.45 | -1.15 | 0.82  | -0.60 | 0.89  | -0.65 | 1.24  |
| 36.34 | -0.36 | 0.13  | 0.13  | 0.37  | -0.16 | 0.71  | 1.36  | 1.44  | -1.62 | -0.66 | 0.18  |
| 38.55 | 0.07  | 1.83  | 0.68  | 1.20  | 0.80  | -0.22 | 1.80  | 0.45  | 1.43  | 0.50  | 0.01  |
| 40.91 | -0.18 | -0.37 | -0.40 | -1.13 | 0.10  | 0.43  | 1.46  | 0.11  | 0.40  | 0.11  | 0.33  |
| 43.43 | -0.46 | -0.80 | 0.35  | 0.66  | 0.03  | -0.27 | 0.11  | 0.64  | -0.41 | -0.51 | 1.93  |
| 46.13 | 0.21  | 0.47  | 2.03  | 1.78  | -0.20 | 0.00  | 1.46  | 1.57  | 1.17  | -1.35 | 0.54  |
| 49.01 | 1.82  | 1.07  | -2.40 | -0.36 | 0.36  | 2.16  | -0.70 | 0.19  | 0.26  | -0.78 | -1.27 |
| 52.09 | 0.56  | -1.22 | 1.33  | 0.48  | 0.98  | -0.67 | -2.19 | 0.99  | 0.14  | -0.24 | -0.27 |
| 55.39 | -1.08 | 0.12  | -0.04 | -0.97 | 0.13  | -1.75 | -0.20 | 0.15  | 0.89  | -1.08 | 1.97  |
| 58.91 | 0.32  | -1.01 | 0.11  | 0.37  | -0.62 | -0.19 | -0.55 | 0.74  | 0.45  | -0.07 | 0.81  |
| 62.68 | -0.70 | -0.95 | 0.84  | 0.91  | 0.58  | 1.36  | 1.85  | 0.47  | 0.45  | 0.14  | -0.34 |
| 66.70 | 0.37  | -0.35 | -0.35 | -1.00 | -0.32 | -0.16 | -0.54 | 1.53  | 1.57  | 0.74  | 0.93  |
| 71.00 | -1.25 | -0.16 | -0.29 | -0.25 | 0.89  | -0.80 | 0.24  | -1.25 | 1.32  | -1.59 | 0.17  |
| 75.60 | -1.67 | 0.41  | -0.42 | -0.66 | -0.65 | -1.61 | 2.70  | 2.21  | 0.79  | 0.33  | 0.14  |
| 80.51 | 1.05  | 0.33  | -0.39 | 0.60  | -0.31 | 0.01  | -1.18 | 1.51  | -0.30 | -1.29 | 0.85  |
| 85.77 | 0.91  | 2.03  | 0.92  | -1.14 | -1.04 | 0.09  | 0.01  | 0.97  | 1.31  | -0.18 | -0.10 |
| 91.38 | 0.08  | 0.25  | -1.35 | 2.13  | 0.63  | 1.48  | 1.05  | -1.16 | 2.02  | -0.71 | -0.12 |

|         |       |       |       |       |       |       |       |       |       |       |       |
|---------|-------|-------|-------|-------|-------|-------|-------|-------|-------|-------|-------|
| 97.39   | 0.10  | 0.68  | -0.55 | -0.58 | -0.07 | 3.27  | 0.27  | 1.18  | 0.46  | 0.09  | 1.44  |
| 103.80  | 0.05  | -1.04 | 0.96  | -0.61 | 0.38  | 1.12  | 0.50  | -0.32 | 1.03  | -0.52 | 0.29  |
| 110.66  | -0.74 | 1.64  | -1.58 | 0.44  | -0.25 | -0.64 | 2.01  | -0.37 | 0.26  | -2.72 | -0.06 |
| 117.99  | 0.50  | 1.00  | -1.29 | 0.82  | 0.53  | -0.24 | -0.70 | 1.19  | 1.13  | -1.22 | 0.89  |
| 125.83  | 1.57  | 1.04  | 0.21  | 1.26  | 1.02  | -0.74 | -0.54 | 0.64  | -0.03 | 0.92  | 1.57  |
| 134.21  | 1.25  | -0.17 | -1.34 | 0.64  | -0.55 | -0.97 | 0.95  | 1.04  | 1.25  | -1.33 | 0.64  |
| 143.17  | 0.46  | 0.07  | 0.81  | -1.39 | 0.91  | 0.57  | -1.06 | -1.93 | 0.79  | -0.30 | 1.15  |
| 152.74  | -1.19 | 0.35  | -1.94 | -2.18 | 0.82  | 0.17  | -1.05 | 1.28  | 1.20  | -1.86 | 0.15  |
| 162.97  | -0.46 | -1.81 | 3.09  | 1.76  | -0.93 | 0.94  | 2.06  | -0.39 | -1.09 | -1.36 | 0.82  |
| 173.91  | -0.23 | -0.66 | 0.51  | 0.66  | 0.24  | 0.77  | -1.51 | 0.35  | 0.81  | -0.03 | 0.07  |
| 185.60  | 0.45  | -0.05 | 0.90  | -0.23 | 1.53  | 0.97  | -0.58 | 0.14  | 2.02  | -1.79 | 1.13  |
| 198.10  | -0.37 | 1.12  | 0.41  | 0.58  | -2.73 | -0.01 | -1.31 | -0.72 | 0.32  | -0.48 | 1.23  |
| 211.46  | 2.09  | -1.44 | 0.57  | 0.18  | -0.39 | -1.69 | 1.88  | -0.05 | -1.27 | -0.86 | 1.23  |
| 225.75  | -1.77 | -0.56 | 1.59  | 1.20  | 1.93  | -0.09 | 0.62  | 0.35  | 0.83  | -1.40 | -0.83 |
| 241.01  | 1.06  | -1.52 | -0.23 | -1.06 | -1.64 | 0.26  | 1.11  | 0.69  | 0.97  | 0.83  | 0.83  |
| 257.33  | 0.17  | 1.80  | -0.84 | -0.13 | 0.72  | 1.85  | 0.87  | -0.49 | 0.98  | -0.75 | 0.68  |
| 274.77  | 0.82  | 1.32  | -0.97 | 0.01  | 0.12  | 0.61  | 0.36  | -0.73 | -0.84 | -0.14 | 0.12  |
| 293.42  | 1.16  | 0.34  | 0.63  | -1.97 | 0.54  | 0.25  | -1.18 | 1.32  | -0.24 | -1.41 | -1.00 |
| 313.35  | -0.81 | 0.46  | 0.89  | -0.83 | -0.12 | 2.40  | 1.78  | 0.38  | 1.06  | 1.51  | -1.15 |
| 334.66  | -0.38 | -0.12 | 1.40  | -0.29 | -1.85 | 1.58  | 1.56  | 0.07  | -2.08 | 1.33  | 1.23  |
| 357.43  | 0.58  | 0.58  | -1.64 | -0.21 | -1.42 | -1.22 | 0.03  | 0.93  | 1.03  | -0.51 | 1.04  |
| 381.78  | -1.02 | -0.06 | -0.23 | -1.09 | 0.12  | 0.46  | 0.68  | -1.20 | 1.51  | -1.68 | 0.21  |
| 407.80  | 0.67  | -1.11 | 0.14  | 2.47  | -1.64 | -2.34 | 1.82  | 3.14  | 0.18  | -0.29 | 2.67  |
| 435.62  | -0.43 | 0.61  | 1.70  | -0.75 | -1.84 | -0.95 | 0.98  | -0.02 | 1.58  | 1.63  | -0.66 |
| 465.35  | 1.84  | -1.70 | -1.33 | 1.00  | -0.54 | -1.06 | 0.52  | 0.58  | -0.13 | 1.23  | 1.48  |
| 497.14  | 0.15  | 1.54  | -1.02 | 0.15  | 1.84  | 0.93  | -0.64 | 0.41  | 2.14  | -1.48 | 0.75  |
| 531.11  | -0.85 | 1.13  | -0.72 | -1.24 | -0.25 | 0.39  | -0.32 | -1.17 | 1.74  | -0.80 | 0.22  |
| 567.43  | 0.85  | 0.78  | -0.62 | -1.00 | -0.86 | 0.84  | 0.68  | 0.57  | -0.88 | -1.46 | 1.27  |
| 606.26  | 0.83  | -0.62 | 0.14  | 0.55  | 0.82  | 0.77  | 0.36  | 1.37  | 1.03  | 0.27  | 0.44  |
| 647.76  | 1.61  | 0.35  | -1.63 | 0.58  | -0.13 | 1.45  | 0.06  | 0.87  | 0.12  | -1.21 | 1.85  |
| 692.12  | 0.03  | -2.23 | 0.21  | 1.94  | 1.72  | 2.39  | -2.36 | 1.14  | -0.77 | 1.02  | -0.02 |
| 739.53  | -1.29 | -1.40 | 0.28  | -1.00 | 0.48  | 2.46  | 0.21  | -0.46 | 2.05  | -0.85 | 0.84  |
| 790.22  | 1.56  | 0.54  | 0.86  | 1.06  | -0.41 | 0.96  | -0.15 | 0.91  | 1.31  | 0.56  | 1.46  |
| 844.40  | -0.59 | -0.90 | -1.46 | 3.09  | -1.12 | 0.19  | 1.27  | 2.37  | -0.94 | 0.42  | 2.30  |
| 902.32  | 1.21  | 0.80  | 2.03  | -1.46 | -0.28 | -0.40 | 3.32  | -0.34 | 0.18  | 0.85  | 2.41  |
| 964.23  | -0.51 | 1.17  | 0.48  | -0.23 | -0.84 | 1.24  | -0.80 | -0.02 | 0.79  | -0.05 | -0.75 |
| 1030.41 | 2.30  | -1.14 | 0.35  | 0.47  | -0.69 | -2.32 | 1.19  | 2.19  | -1.54 | -1.76 | 1.83  |
| 1101.15 | 1.81  | -1.27 | -0.14 | -0.19 | -0.23 | 1.03  | -2.25 | 1.65  | 0.67  | 0.66  | 0.08  |
| 1176.77 | 0.90  | -1.61 | 0.65  | -0.65 | 0.14  | 1.89  | -0.20 | 1.19  | 0.15  | 0.04  | 0.20  |
| 1257.60 | 0.04  | 3.10  | -1.00 | -0.90 | 1.45  | -0.08 | -1.82 | 1.35  | 2.17  | -1.32 | -0.59 |
| 1344.00 | -0.40 | 0.18  | 0.62  | -2.16 | 0.46  | -0.25 | 0.74  | 1.86  | 0.39  | -0.12 | -0.38 |
| 1436.36 | 0.39  | -0.27 | 1.82  | 0.43  | -1.71 | 0.82  | 0.05  | 0.58  | -0.43 | 0.36  | 0.74  |
| 1535.09 | 1.28  | -0.71 | -0.94 | -1.02 | 0.82  | 0.17  | 0.77  | 2.04  | -2.02 | 0.14  | 0.67  |
| 1640.63 | 0.92  | 0.46  | 2.47  | -0.91 | -0.26 | 1.77  | 1.70  | -1.66 | -0.60 | -0.18 | 0.36  |
| 1753.44 | 0.14  | 1.13  | -0.78 | -1.95 | -0.93 | 0.15  | -0.15 | 0.48  | 0.60  | -1.99 | 0.92  |
| 1874.02 | 0.21  | -0.82 | -0.42 | 0.61  | 0.61  | 0.37  | -0.45 | 1.49  | 0.64  | -0.18 | 1.30  |
| 2002.92 | -2.17 | -0.01 | 0.21  | -1.05 | 0.59  | 1.08  | -0.72 | 0.70  | 0.84  | 0.04  | -0.93 |
| 2140.71 | 0.64  | 1.03  | -0.74 | -0.79 | -0.87 | -0.12 | 0.27  | 0.59  | 0.24  | -0.23 | 0.72  |
| 2288.00 | -0.84 | -1.53 | 1.19  | -0.14 | 0.42  | -0.15 | -0.49 | -0.41 | -0.28 | -0.53 | 1.52  |
| 2445.44 | -0.91 | -0.56 | 0.72  | -2.01 | -1.12 | 1.44  | 0.73  | -1.51 | 1.49  | 0.56  | -0.85 |

|                                 |            |            |            |            |            |            |            |            |            |            |            |        |
|---------------------------------|------------|------------|------------|------------|------------|------------|------------|------------|------------|------------|------------|--------|
| 2613.73                         | 1.14       | 0.29       | -0.79      | 0.00       | -2.34      | -0.12      | -0.29      | 1.98       | 0.40       | -0.75      | 0.48       |        |
| 2793.63                         | -0.34      | 1.70       | 0.05       | -0.02      | 0.40       | 1.16       | 1.52       | -0.09      | 0.49       | -1.15      | 0.31       |        |
| 2985.93                         | 0.43       | -1.90      | -1.50      | 1.14       | -1.41      | -1.40      | 2.53       | 2.83       | -0.49      | -1.78      | 1.72       |        |
| 3191.49                         | -1.74      | 2.03       | 1.20       | -0.93      | -0.74      | 2.63       | 0.59       | 0.45       | 0.04       | 0.08       | 0.23       |        |
| 3411.21                         | 0.34       | 1.92       | -0.21      | 0.22       | 0.05       | -0.73      | -1.15      | 1.64       | 0.25       | -1.45      | 1.65       |        |
| 3646.09                         | -0.54      | 0.68       | 0.90       | -1.07      | -0.55      | -0.96      | 0.29       | 0.20       | 0.66       | -1.36      | 1.38       |        |
| 3897.16                         | 2.72       | 0.00       | -2.02      | -0.41      | 1.94       | -1.39      | -2.86      | 3.77       | -1.77      | -2.46      | 0.97       |        |
| Wavelength <sup>h</sup><br>(nm) | 334.0<br>9 | 335.5<br>1 | 336.9<br>4 | 338.3<br>6 | 339.7<br>9 | 341.21     | 342.6<br>3 | 344.0<br>6 | 345.4<br>8 | 346.9<br>1 | 348.33     |        |
| Time<br>(ps)                    | -2.74      | 0.27       | 0.06       | 0.19       | 0.53       | 0.87       | -0.67      | -0.31      | -0.19      | 0.14       | 0.33       | -0.11  |
|                                 | -2.24      | 0.27       | -0.57      | -0.48      | 0.55       | -0.18      | 0.42       | -0.13      | -0.26      | 0.18       | 0.35       | -0.71  |
|                                 | -1.74      | 0.97       | 0.43       | 0.40       | -0.02      | -0.13      | 0.72       | 0.05       | -0.04      | -0.11      | -0.15      | -0.36  |
|                                 | -1.24      | -0.97      | 0.57       | -1.80      | -0.86      | -0.80      | 0.64       | 0.53       | -0.41      | 0.21       | -0.79      | 0.71   |
|                                 | -0.74      | -0.06      | -1.13      | 0.97       | -0.33      | -0.63      | 0.08       | 0.04       | 0.30       | 0.21       | -0.16      | 0.33   |
|                                 | -0.24      | -0.28      | 0.04       | 0.40       | -0.88      | -0.11      | -0.45      | -1.23      | -0.07      | 0.28       | 0.55       | 0.32   |
|                                 | -0.14      | 0.06       | 0.24       | 0.32       | 0.56       | 0.61       | -0.50      | 0.23       | 0.29       | -0.22      | -0.17      | 0.21   |
|                                 | -0.04      | -0.26      | 0.36       | -0.01      | 0.45       | 0.37       | -0.24      | 0.82       | 0.40       | -0.69      | 0.06       | -0.40  |
|                                 | 0.06       | 0.79       | -0.27      | -0.86      | 0.43       | -0.57      | -0.13      | -0.47      | -0.03      | 0.52       | 0.11       | -0.01  |
|                                 | 0.16       | 0.36       | -0.33      | -0.44      | -0.30      | 0.77       | 0.41       | 0.31       | -0.36      | 0.46       | 0.05       | 0.50   |
|                                 | 0.26       | 0.95       | -0.01      | 0.22       | 0.31       | 1.18       | 0.22       | -0.13      | -0.03      | 0.50       | -0.29      | 0.19   |
|                                 | 0.31       | -1.07      | 0.62       | -1.54      | -0.29      | 0.71       | -0.02      | -0.08      | 0.03       | -0.32      | 0.03       | -0.24  |
|                                 | 0.36       | -0.56      | -0.54      | -1.23      | -0.26      | 0.82       | 0.75       | -0.03      | -0.60      | 0.01       | -0.14      | 0.11   |
|                                 | 0.41       | -17.30     | -13.70     | -5.96      | 0.67       | -0.54      | -0.51      | -0.40      | 0.41       | 0.48       | 0.12       | -0.28  |
|                                 | 0.46       | 26.32      | -0.54      | -31.24     | -45.92     | -36.70     | -20.53     | -10.30     | -4.67      | -0.80      | 0.32       | 0.09   |
|                                 | 0.51       | 69.34      | 91.50      | 100.7<br>5 | 98.50      | 82.18      | 45.45      | -4.43      | -50.56     | -69.02     | -55.25     | -28.14 |
|                                 | 0.56       | -3.24      | 31.93      | 66.64      | 97.57      | 129.5<br>2 | 159.07     | 169.6<br>6 | 148.7<br>2 | 101.8<br>9 | 41.41      | -13.93 |
|                                 | 0.61       | -47.13     | -59.36     | -53.84     | -29.21     | 10.93      | 71.34      | 137.1<br>7 | 186.9<br>9 | 210.9<br>8 | 215.4<br>8 | 204.26 |
|                                 | 0.66       | 3.75       | -0.38      | -12.01     | -40.13     | -76.57     | 100.90     | -92.86     | -51.83     | 6.65       | 72.84      | 138.46 |
|                                 | 0.71       | 0.90       | 1.92       | 1.01       | 4.78       | 6.45       | 6.82       | -0.31      | -13.76     | -44.00     | -89.46     | 120.07 |
|                                 | 0.76       | 0.79       | 1.80       | 1.32       | 4.22       | 4.32       | 3.45       | 2.79       | 4.23       | 7.03       | 11.30      | 9.20   |
|                                 | 0.81       | 1.25       | 2.74       | 0.68       | 4.29       | 2.06       | 3.50       | 4.47       | 5.66       | 6.18       | 5.41       | 3.46   |
|                                 | 0.86       | 0.59       | -0.66      | 1.93       | 1.74       | 2.21       | 4.15       | 4.24       | 4.63       | 3.84       | 4.39       | 5.54   |
|                                 | 0.91       | 0.89       | 1.54       | 0.66       | 1.92       | 3.17       | 3.56       | 2.92       | 4.05       | 4.53       | 4.20       | 5.42   |
|                                 | 0.96       | 1.39       | 0.98       | 0.63       | 2.87       | 3.23       | 2.67       | 2.42       | 3.66       | 4.01       | 5.42       | 5.03   |
|                                 | 1.01       | 0.74       | 0.77       | 1.38       | 1.55       | 2.53       | 2.92       | 3.42       | 4.54       | 4.38       | 5.25       | 5.87   |
|                                 | 1.06       | 0.74       | 2.84       | 0.79       | 1.19       | 1.71       | 3.09       | 3.05       | 4.06       | 4.42       | 4.97       | 4.73   |
|                                 | 1.11       | 0.52       | 1.04       | 0.34       | 0.51       | 1.79       | 1.95       | 3.02       | 3.12       | 4.28       | 3.50       | 4.37   |
|                                 | 1.16       | 0.69       | 2.08       | 1.70       | 2.63       | 1.92       | 2.03       | 3.45       | 3.35       | 2.25       | 4.06       | 4.89   |
|                                 | 1.21       | -0.21      | 0.40       | -0.23      | 1.36       | 1.66       | 2.66       | 2.51       | 3.79       | 4.06       | 4.24       | 4.12   |
|                                 | 1.26       | 0.87       | 2.51       | 1.59       | 2.32       | 0.87       | 3.02       | 3.66       | 3.22       | 3.36       | 3.64       | 4.00   |
|                                 | 1.31       | 0.94       | 1.05       | 0.58       | 2.46       | 1.33       | 1.95       | 1.85       | 2.73       | 2.53       | 2.93       | 3.24   |
|                                 | 1.36       | -0.09      | 1.08       | 1.06       | 1.10       | 1.89       | 1.85       | 2.44       | 1.98       | 3.27       | 3.57       | 4.26   |
|                                 | 1.41       | -0.36      | 1.42       | 0.38       | 1.10       | 1.36       | 1.60       | 1.97       | 2.46       | 3.17       | 4.14       | 3.97   |
|                                 | 1.46       | 2.17       | 1.69       | 1.91       | 1.13       | 1.34       | 1.88       | 3.22       | 3.05       | 4.54       | 3.20       | 3.27   |
|                                 | 1.51       | 0.94       | 0.35       | 0.70       | 0.20       | 0.67       | 2.63       | 2.76       | 2.60       | 1.94       | 2.86       | 3.91   |
|                                 | 1.56       | 0.77       | 0.17       | 0.14       | 1.90       | 0.18       | 2.77       | 2.69       | 2.34       | 2.28       | 3.02       | 4.43   |
|                                 | 1.61       | 0.69       | 0.20       | -0.51      | 2.12       | 0.92       | 2.06       | 1.50       | 2.29       | 3.64       | 2.95       | 3.82   |



|      |       |       |       |       |       |      |      |      |      |      |      |
|------|-------|-------|-------|-------|-------|------|------|------|------|------|------|
| 1.66 | -0.91 | 0.38  | 0.56  | 0.60  | 2.04  | 2.43 | 2.83 | 2.64 | 3.29 | 3.34 | 3.45 |
| 1.71 | -0.31 | 0.83  | 0.79  | 0.47  | 0.38  | 2.14 | 1.93 | 1.97 | 3.30 | 4.05 | 3.22 |
| 1.76 | 1.43  | 1.94  | 0.35  | 1.39  | 2.47  | 2.14 | 0.95 | 2.98 | 3.42 | 3.92 | 3.96 |
| 1.81 | 1.28  | 1.08  | 0.89  | 1.07  | 0.18  | 2.14 | 1.48 | 2.33 | 2.86 | 3.14 | 3.03 |
| 1.86 | 1.09  | 0.54  | 1.45  | 1.39  | 0.85  | 1.42 | 2.46 | 2.10 | 2.73 | 2.87 | 3.84 |
| 1.91 | 0.44  | 0.11  | 0.46  | 2.13  | 1.42  | 1.65 | 1.35 | 2.69 | 3.02 | 3.26 | 2.74 |
| 1.96 | 0.11  | 0.30  | 0.46  | 1.36  | 1.14  | 1.77 | 2.40 | 1.91 | 2.43 | 3.14 | 3.89 |
| 2.01 | 0.72  | 0.48  | 0.80  | 0.35  | 1.41  | 1.33 | 1.44 | 2.65 | 2.87 | 3.33 | 2.78 |
| 2.06 | -0.13 | -0.53 | 0.62  | 1.25  | 1.37  | 0.88 | 1.72 | 2.61 | 3.24 | 3.49 | 3.66 |
| 2.11 | -2.64 | 2.24  | 1.96  | 0.64  | -0.38 | 2.99 | 1.37 | 1.62 | 3.04 | 2.76 | 2.62 |
| 2.16 | -0.72 | 1.93  | -0.18 | 0.25  | 1.31  | 2.56 | 1.13 | 1.80 | 2.77 | 2.71 | 2.73 |
| 2.21 | 1.41  | 0.87  | 0.65  | 1.13  | 1.85  | 1.72 | 3.07 | 2.57 | 2.23 | 3.19 | 3.63 |
| 2.26 | 0.57  | -1.31 | 1.76  | 0.78  | 1.24  | 1.76 | 2.05 | 2.51 | 3.28 | 3.46 | 3.91 |
| 2.31 | 0.30  | 1.27  | 0.58  | 1.10  | 1.32  | 1.14 | 1.47 | 2.59 | 2.53 | 2.31 | 3.57 |
| 2.36 | 2.29  | 0.62  | -0.16 | 2.28  | 1.84  | 1.34 | 2.11 | 3.11 | 2.20 | 3.41 | 3.64 |
| 2.41 | 0.65  | 0.05  | 1.27  | -0.16 | 0.94  | 2.17 | 1.62 | 2.65 | 2.72 | 2.65 | 3.13 |
| 2.46 | -0.12 | 0.55  | 1.04  | 0.06  | 0.71  | 1.93 | 1.73 | 2.10 | 3.02 | 3.56 | 3.71 |
| 2.51 | 2.02  | 1.23  | -0.73 | 0.57  | 2.04  | 2.09 | 1.61 | 3.17 | 3.43 | 3.57 | 3.40 |
| 2.56 | 2.94  | 1.07  | -0.69 | 1.13  | 2.32  | 0.90 | 1.87 | 3.16 | 3.22 | 2.76 | 3.73 |
| 2.61 | 2.05  | 1.41  | 0.23  | 0.82  | 1.20  | 0.89 | 1.70 | 1.93 | 1.76 | 2.84 | 2.04 |
| 2.66 | 1.36  | 0.48  | -0.24 | 1.10  | 1.22  | 2.04 | 1.74 | 2.10 | 1.97 | 3.23 | 3.76 |
| 2.71 | 0.40  | -0.20 | 1.44  | 1.60  | -0.21 | 2.11 | 3.11 | 1.67 | 2.16 | 3.15 | 3.35 |
| 2.76 | -1.29 | 0.65  | 1.01  | 1.69  | 1.05  | 2.99 | 2.17 | 1.96 | 2.42 | 3.77 | 2.86 |
| 2.81 | 0.89  | 1.31  | -0.62 | 0.36  | -0.35 | 2.09 | 2.51 | 2.53 | 3.11 | 3.06 | 2.91 |
| 2.86 | -0.95 | 0.01  | -0.68 | 0.44  | 0.82  | 1.29 | 2.51 | 1.82 | 2.29 | 3.33 | 3.52 |
| 2.91 | 1.55  | 1.19  | 1.07  | 1.26  | 1.38  | 0.95 | 2.51 | 2.90 | 2.00 | 2.88 | 3.06 |
| 2.96 | 0.41  | 0.25  | -0.75 | 1.23  | 1.77  | 1.70 | 1.66 | 2.73 | 2.82 | 3.66 | 4.44 |
| 3.01 | 1.39  | 1.49  | 1.21  | 0.23  | 1.80  | 1.63 | 1.23 | 1.88 | 3.43 | 2.63 | 3.27 |
| 3.06 | 1.64  | 0.95  | -0.96 | 0.91  | 1.04  | 2.71 | 1.76 | 2.58 | 2.60 | 2.67 | 3.57 |
| 3.11 | 1.33  | -0.75 | 0.37  | -0.11 | 0.45  | 1.15 | 1.80 | 2.29 | 2.38 | 3.21 | 3.01 |
| 3.16 | 1.06  | 0.52  | 0.43  | 1.63  | 0.69  | 1.33 | 2.03 | 3.43 | 1.94 | 2.84 | 3.41 |
| 3.21 | 0.29  | 0.37  | -0.68 | -0.49 | 1.30  | 1.79 | 1.73 | 2.16 | 2.89 | 2.71 | 3.29 |
| 3.26 | 0.35  | 0.66  | 1.36  | 1.87  | 0.56  | 0.29 | 1.53 | 1.78 | 2.47 | 3.07 | 2.58 |
| 3.31 | 0.55  | 0.96  | 0.79  | 0.37  | 1.53  | 2.27 | 2.89 | 2.03 | 3.38 | 3.19 | 2.96 |
| 3.36 | -1.04 | 1.77  | 0.90  | 0.67  | 2.52  | 1.60 | 1.50 | 2.22 | 3.64 | 2.85 | 3.27 |
| 3.41 | 0.59  | 1.17  | 1.00  | 1.12  | 0.96  | 1.99 | 2.33 | 2.25 | 2.53 | 3.67 | 2.78 |
| 3.46 | -0.46 | 0.44  | 0.39  | 0.56  | 1.45  | 1.56 | 2.04 | 2.39 | 2.69 | 3.14 | 2.89 |
| 3.51 | 0.73  | 0.00  | 1.78  | 0.52  | 1.86  | 2.05 | 0.88 | 2.76 | 2.90 | 3.53 | 3.23 |
| 3.56 | 1.15  | 1.50  | -0.87 | 1.40  | 0.49  | 1.46 | 2.52 | 2.99 | 2.51 | 2.31 | 3.44 |
| 3.61 | 0.45  | -1.46 | 1.32  | 1.32  | 0.26  | 1.86 | 3.27 | 2.44 | 2.04 | 3.16 | 2.17 |
| 3.66 | 1.26  | -0.40 | -0.22 | 0.39  | 1.30  | 1.69 | 1.97 | 1.96 | 2.57 | 2.95 | 3.37 |
| 3.71 | 1.43  | 0.92  | -0.40 | 1.12  | 2.03  | 1.32 | 1.73 | 2.12 | 2.08 | 3.55 | 3.62 |
| 3.76 | -0.40 | 0.76  | -0.70 | 0.90  | 0.81  | 1.82 | 1.70 | 3.01 | 3.36 | 4.07 | 3.27 |
| 3.81 | 1.08  | 1.67  | -1.34 | -0.65 | 2.50  | 1.06 | 0.53 | 1.21 | 3.52 | 2.82 | 2.88 |
| 3.86 | -0.21 | 1.44  | 0.49  | -0.42 | 1.60  | 2.23 | 2.29 | 2.56 | 2.08 | 2.41 | 3.01 |
| 3.91 | 1.37  | -0.73 | -0.43 | 1.39  | 2.16  | 0.97 | 2.54 | 3.11 | 2.45 | 2.85 | 2.78 |
| 3.96 | 1.71  | 0.86  | -1.26 | 1.89  | 2.42  | 1.90 | 1.43 | 3.35 | 2.87 | 2.67 | 3.44 |
| 4.01 | -1.23 | 1.20  | 0.67  | 0.79  | 0.75  | 1.68 | 1.78 | 1.75 | 2.77 | 3.36 | 2.54 |
| 4.06 | 1.26  | 1.05  | 0.15  | 1.29  | 0.05  | 1.43 | 2.41 | 2.51 | 3.01 | 2.76 | 2.99 |
| 4.11 | 0.23  | 1.01  | -1.07 | 0.23  | 1.10  | 2.03 | 0.51 | 2.40 | 2.73 | 2.51 | 2.26 |

|      |       |       |       |       |       |      |      |      |      |      |      |
|------|-------|-------|-------|-------|-------|------|------|------|------|------|------|
| 4.16 | 1.08  | 1.32  | 0.02  | 0.17  | 1.01  | 2.29 | 1.16 | 1.94 | 2.58 | 2.68 | 2.59 |
| 4.21 | 0.29  | 0.28  | 1.06  | 1.07  | 1.50  | 2.30 | 2.12 | 2.68 | 3.39 | 3.52 | 3.10 |
| 4.26 | -0.44 | 0.75  | 0.91  | 0.75  | 1.63  | 1.60 | 2.67 | 2.53 | 3.29 | 3.25 | 3.57 |
| 4.31 | 0.35  | 0.77  | 0.58  | 1.75  | 0.17  | 1.44 | 1.95 | 2.31 | 2.28 | 3.04 | 2.97 |
| 4.36 | 0.64  | 1.79  | 0.49  | 1.79  | 1.40  | 2.07 | 1.82 | 1.29 | 2.43 | 2.00 | 2.22 |
| 4.41 | -0.92 | 0.46  | 0.76  | 1.96  | 1.78  | 2.42 | 2.72 | 2.40 | 2.25 | 2.46 | 3.60 |
| 4.46 | 0.11  | 1.84  | 1.19  | 0.68  | 1.34  | 1.68 | 1.64 | 2.01 | 2.86 | 3.64 | 3.47 |
| 4.51 | 1.04  | 0.83  | 0.32  | 1.36  | 1.57  | 2.28 | 2.03 | 2.01 | 3.02 | 3.07 | 3.37 |
| 4.56 | -0.02 | 0.10  | -0.67 | 0.80  | 0.28  | 1.65 | 1.97 | 1.74 | 2.18 | 2.69 | 2.53 |
| 4.61 | 0.63  | 0.67  | -0.32 | 1.26  | 0.93  | 1.59 | 2.45 | 2.40 | 2.18 | 2.85 | 3.04 |
| 4.66 | 1.53  | 1.54  | 0.00  | 1.18  | 1.39  | 1.67 | 2.44 | 1.44 | 2.15 | 2.58 | 1.78 |
| 4.71 | 1.44  | -0.01 | 0.71  | 1.21  | 0.70  | 1.29 | 3.28 | 2.87 | 2.75 | 2.55 | 3.76 |
| 4.76 | 0.87  | 1.55  | 0.86  | 1.30  | 1.06  | 2.30 | 2.02 | 2.84 | 2.36 | 3.46 | 3.84 |
| 4.81 | 0.58  | 0.85  | -0.87 | 1.43  | 0.77  | 1.90 | 2.38 | 2.50 | 2.75 | 3.04 | 3.28 |
| 4.86 | 0.15  | 0.51  | 0.93  | 2.31  | 1.56  | 2.11 | 1.71 | 2.55 | 2.21 | 2.20 | 2.89 |
| 4.91 | 0.81  | -0.15 | 1.21  | 1.50  | 0.84  | 1.73 | 1.87 | 2.25 | 2.40 | 2.65 | 2.41 |
| 4.96 | -0.32 | 1.32  | -0.34 | 0.65  | 0.86  | 1.30 | 2.36 | 2.65 | 2.74 | 3.10 | 3.88 |
| 5.01 | 1.22  | 1.70  | -0.27 | 1.07  | 1.03  | 0.76 | 1.64 | 2.09 | 2.41 | 3.06 | 3.50 |
| 5.06 | 0.05  | 1.25  | -0.58 | 0.90  | 1.46  | 1.74 | 1.77 | 2.29 | 2.14 | 3.05 | 3.39 |
| 5.11 | 0.51  | 0.60  | -0.40 | 1.76  | 0.77  | 1.32 | 1.12 | 2.43 | 2.79 | 2.04 | 2.73 |
| 5.16 | 0.57  | 0.73  | -0.33 | 0.31  | 1.30  | 1.23 | 1.80 | 2.61 | 2.84 | 3.34 | 2.06 |
| 5.21 | 1.98  | 0.30  | 0.48  | 0.73  | 1.66  | 0.36 | 2.53 | 1.69 | 2.55 | 2.80 | 2.98 |
| 5.26 | 0.59  | 0.58  | 1.13  | 0.83  | 1.71  | 1.62 | 2.46 | 2.73 | 2.54 | 3.42 | 3.01 |
| 5.31 | 0.56  | 2.04  | 1.75  | 0.90  | 1.07  | 2.68 | 2.36 | 2.31 | 2.25 | 3.15 | 2.81 |
| 5.38 | 1.34  | -0.64 | 0.37  | 1.16  | 1.09  | 1.46 | 1.15 | 2.59 | 2.50 | 3.03 | 2.84 |
| 5.45 | 0.92  | 1.52  | 0.63  | -0.32 | 1.06  | 1.90 | 1.79 | 3.04 | 2.55 | 2.91 | 3.50 |
| 5.53 | -0.11 | -0.61 | 0.58  | 0.04  | 0.91  | 1.42 | 2.15 | 2.70 | 2.04 | 2.58 | 2.77 |
| 5.61 | -0.05 | -0.30 | 0.38  | 0.72  | -0.01 | 1.70 | 1.62 | 1.76 | 2.16 | 3.55 | 2.99 |
| 5.70 | 2.01  | 0.09  | 0.03  | 0.88  | 0.79  | 1.31 | 1.61 | 2.17 | 2.46 | 2.36 | 2.49 |
| 5.80 | 0.45  | 1.97  | 0.43  | 0.79  | 1.60  | 1.76 | 1.61 | 1.71 | 2.16 | 2.59 | 3.17 |
| 5.90 | 0.18  | 0.02  | 1.85  | 0.76  | 1.44  | 1.13 | 1.65 | 1.73 | 2.76 | 3.04 | 3.03 |
| 6.01 | 0.26  | -0.42 | 1.19  | 1.85  | 1.33  | 2.61 | 1.87 | 1.77 | 3.10 | 3.50 | 3.56 |
| 6.13 | -0.09 | 0.11  | -0.54 | 1.57  | 2.21  | 2.01 | 1.86 | 1.61 | 2.56 | 3.11 | 3.24 |
| 6.25 | 0.14  | 0.26  | -0.45 | 1.33  | 0.21  | 1.71 | 1.76 | 2.09 | 2.00 | 2.00 | 2.45 |
| 6.39 | 0.78  | 0.70  | 0.12  | 1.78  | 0.37  | 1.61 | 1.64 | 1.29 | 2.28 | 2.17 | 1.93 |
| 6.53 | 0.64  | 0.06  | -0.26 | 0.63  | 1.03  | 1.72 | 1.20 | 1.35 | 1.77 | 2.40 | 2.85 |
| 6.69 | 0.99  | 0.27  | 0.23  | 1.63  | 1.06  | 1.67 | 1.12 | 2.41 | 2.63 | 3.39 | 3.17 |
| 6.85 | -1.38 | 1.26  | 0.88  | 1.27  | 0.56  | 1.82 | 1.47 | 1.87 | 2.17 | 2.30 | 2.31 |
| 7.03 | 1.09  | 0.19  | 0.02  | 1.54  | 0.94  | 0.32 | 0.72 | 1.99 | 1.25 | 2.22 | 2.50 |
| 7.21 | 1.00  | 1.46  | 0.76  | 0.82  | 1.14  | 1.55 | 1.83 | 1.65 | 1.77 | 1.73 | 2.06 |
| 7.41 | 0.23  | 0.43  | -0.12 | 1.15  | 0.74  | 0.92 | 2.17 | 1.92 | 2.11 | 2.61 | 2.46 |
| 7.63 | 0.44  | 0.01  | 0.64  | 1.07  | 1.16  | 2.33 | 1.73 | 2.56 | 2.01 | 2.60 | 2.56 |
| 7.86 | 0.53  | -0.07 | -0.35 | 0.64  | 1.29  | 0.96 | 1.69 | 1.56 | 1.41 | 2.33 | 3.04 |
| 8.10 | 0.37  | 0.76  | -0.81 | 0.33  | 0.99  | 1.82 | 1.03 | 2.48 | 2.16 | 2.07 | 2.45 |
| 8.36 | -1.69 | 0.26  | 0.59  | 0.10  | 0.69  | 1.25 | 1.42 | 1.24 | 2.09 | 1.85 | 2.43 |
| 8.64 | 0.57  | 0.49  | 1.08  | -0.06 | 0.56  | 1.62 | 2.04 | 2.48 | 1.19 | 2.61 | 2.26 |
| 8.94 | 0.11  | -0.67 | 0.49  | 0.46  | 0.70  | 1.20 | 2.33 | 2.07 | 1.90 | 2.08 | 1.95 |
| 9.26 | 0.63  | -1.34 | 0.56  | 1.50  | -0.93 | 1.24 | 2.43 | 1.90 | 2.11 | 2.09 | 2.97 |
| 9.60 | 0.01  | 0.62  | 0.46  | -0.56 | 0.64  | 2.55 | 1.74 | 0.76 | 2.40 | 2.39 | 2.26 |
| 9.97 | 0.00  | 1.86  | -0.56 | -0.65 | 0.74  | 0.45 | 1.50 | 1.35 | 1.67 | 1.15 | 2.12 |

|        |       |       |       |       |       |       |       |       |      |      |      |
|--------|-------|-------|-------|-------|-------|-------|-------|-------|------|------|------|
| 10.36  | -0.43 | 1.01  | -0.44 | -0.76 | 0.83  | 1.77  | 1.24  | 1.50  | 1.62 | 2.82 | 2.47 |
| 10.77  | 0.79  | -0.16 | -0.02 | 0.85  | 1.12  | 0.49  | 0.67  | 1.57  | 2.16 | 2.52 | 2.12 |
| 11.22  | 0.20  | 1.57  | -0.89 | 0.28  | 0.18  | 0.69  | 1.07  | 1.32  | 1.03 | 2.03 | 2.19 |
| 11.70  | 1.21  | 0.29  | -0.81 | 1.10  | 1.13  | 1.00  | 0.53  | 2.00  | 1.97 | 2.46 | 2.14 |
| 12.21  | -0.15 | -0.83 | 0.75  | -0.37 | 0.09  | 2.06  | 0.57  | 1.28  | 2.90 | 2.62 | 0.95 |
| 12.75  | 0.54  | 0.14  | 0.49  | 0.87  | 0.13  | 1.23  | 1.72  | 0.87  | 1.49 | 1.62 | 1.36 |
| 13.33  | 0.65  | 0.19  | 0.85  | 1.00  | 0.19  | 1.25  | 0.51  | 1.54  | 2.48 | 1.94 | 2.17 |
| 13.95  | 0.69  | 0.63  | 0.97  | 0.79  | 0.81  | 0.66  | 1.91  | 1.77  | 2.04 | 1.95 | 2.09 |
| 14.62  | -0.95 | 0.08  | -0.25 | 0.06  | -0.53 | 1.46  | 0.57  | 1.32  | 1.42 | 1.66 | 1.40 |
| 15.33  | -0.77 | 1.03  | -1.58 | 0.07  | 0.27  | -0.15 | 0.73  | 0.05  | 2.18 | 2.01 | 2.27 |
| 16.09  | -0.31 | 0.46  | -1.24 | 0.75  | 1.41  | 0.84  | 1.33  | 1.47  | 1.89 | 2.19 | 1.97 |
| 16.90  | -0.51 | 0.49  | -0.16 | -0.24 | 1.17  | 1.14  | 1.02  | 1.19  | 2.38 | 1.90 | 1.65 |
| 17.77  | 0.70  | -0.24 | -0.27 | 1.05  | 0.11  | 0.26  | 1.82  | 1.37  | 1.47 | 1.41 | 1.88 |
| 18.70  | -1.56 | 1.18  | 0.72  | 0.39  | 1.33  | 1.16  | 1.05  | 1.01  | 1.41 | 2.20 | 2.19 |
| 19.69  | 0.97  | 0.02  | -0.01 | -0.61 | 0.22  | 0.91  | 0.62  | 0.68  | 1.75 | 1.82 | 1.43 |
| 20.75  | -0.27 | 0.05  | 0.58  | 0.52  | 0.42  | 1.40  | 1.91  | 0.85  | 1.37 | 2.08 | 1.65 |
| 21.89  | 0.51  | 0.13  | -0.77 | 0.42  | 0.17  | 0.25  | 1.01  | 0.88  | 1.64 | 1.98 | 2.88 |
| 23.10  | -0.01 | 0.72  | -1.14 | 0.59  | 0.55  | -0.13 | -0.01 | 1.74  | 2.14 | 2.00 | 1.78 |
| 24.39  | -0.05 | 0.78  | -0.47 | 0.74  | -0.12 | -0.68 | 0.82  | 1.75  | 1.22 | 1.82 | 1.55 |
| 25.78  | -0.01 | 0.31  | 0.68  | 1.77  | -0.85 | 1.01  | 1.03  | 1.82  | 1.66 | 1.89 | 1.31 |
| 27.26  | 0.80  | 0.61  | 0.26  | -0.09 | -0.42 | 0.41  | 0.25  | 1.19  | 1.93 | 2.22 | 1.74 |
| 28.84  | 0.51  | -0.14 | 0.02  | 0.22  | -0.17 | 0.97  | 0.35  | 0.72  | 0.82 | 1.92 | 2.16 |
| 30.53  | -1.01 | -0.04 | -0.18 | 0.10  | 0.37  | 0.25  | 1.32  | 1.00  | 0.90 | 1.86 | 1.83 |
| 32.34  | 0.35  | 0.79  | -1.35 | 1.76  | 0.51  | 1.00  | 1.19  | 0.88  | 1.52 | 2.50 | 2.03 |
| 34.27  | 0.02  | 0.51  | 0.80  | 0.28  | 0.74  | 0.08  | 1.01  | 0.79  | 1.21 | 1.66 | 1.75 |
| 36.34  | -0.39 | 1.29  | -0.97 | -0.84 | -0.17 | 1.54  | 0.22  | 1.38  | 0.94 | 1.27 | 1.70 |
| 38.55  | -0.22 | -0.36 | -0.77 | 0.07  | 0.80  | 1.00  | 0.62  | 0.54  | 1.36 | 1.17 | 1.70 |
| 40.91  | 1.27  | -0.10 | 0.34  | 0.34  | 0.23  | 1.10  | 0.27  | 1.09  | 0.81 | 1.05 | 1.71 |
| 43.43  | -0.94 | 0.93  | -0.32 | 0.01  | -0.10 | 0.42  | 1.21  | 0.56  | 1.59 | 1.64 | 1.13 |
| 46.13  | 0.31  | 0.71  | 0.38  | 0.82  | 0.48  | 0.48  | 0.90  | 1.86  | 1.35 | 1.45 | 1.76 |
| 49.01  | 0.21  | 0.74  | 0.05  | -0.10 | 0.31  | 0.41  | 0.73  | 1.46  | 1.39 | 1.81 | 1.46 |
| 52.09  | 0.11  | 0.18  | -0.83 | 0.69  | -0.06 | 1.40  | 0.75  | 1.67  | 0.88 | 1.78 | 1.10 |
| 55.39  | -0.96 | 1.08  | 0.56  | -0.23 | -0.23 | 0.57  | 1.04  | 1.04  | 1.35 | 1.36 | 0.68 |
| 58.91  | 0.96  | -0.95 | -0.26 | 0.25  | 0.43  | 0.07  | 1.30  | 1.40  | 0.93 | 1.43 | 1.11 |
| 62.68  | 0.13  | 1.72  | 1.02  | 0.61  | 0.46  | 0.85  | 0.92  | 0.72  | 1.24 | 1.77 | 1.44 |
| 66.70  | -0.03 | 0.31  | 0.16  | 0.35  | 1.06  | 1.16  | 0.18  | 0.78  | 2.06 | 1.77 | 1.94 |
| 71.00  | 0.24  | 0.31  | -0.17 | 0.04  | 0.34  | 0.43  | 0.52  | 0.91  | 1.67 | 1.51 | 1.63 |
| 75.60  | 0.21  | 0.42  | 0.45  | -0.49 | 0.61  | 0.65  | 0.90  | 1.24  | 1.92 | 0.86 | 1.52 |
| 80.51  | 0.14  | 0.72  | 0.59  | 0.19  | 0.05  | 1.53  | 1.22  | 1.39  | 2.15 | 2.08 | 1.28 |
| 85.77  | 0.55  | -0.45 | -0.61 | -0.14 | 1.03  | 0.89  | 0.90  | 1.62  | 1.40 | 2.14 | 1.41 |
| 91.38  | 0.49  | -0.17 | -0.99 | 0.30  | 0.43  | 0.18  | 0.95  | 0.39  | 1.70 | 1.68 | 1.33 |
| 97.39  | 0.81  | 0.37  | -0.26 | 0.48  | 0.14  | 1.16  | 0.03  | 1.25  | 0.95 | 1.43 | 1.46 |
| 103.80 | -0.68 | 1.98  | -0.54 | 0.00  | 0.27  | 0.53  | 0.81  | 1.44  | 0.79 | 1.98 | 1.92 |
| 110.66 | -0.66 | 0.19  | -0.01 | 2.08  | 0.61  | 0.28  | 1.55  | 1.13  | 2.07 | 1.28 | 2.18 |
| 117.99 | -0.07 | -0.42 | -1.32 | 1.46  | -0.36 | 1.12  | 0.81  | 1.43  | 1.09 | 1.56 | 1.10 |
| 125.83 | 0.13  | -0.13 | 0.20  | 0.85  | 0.57  | -0.41 | 1.25  | -0.01 | 0.50 | 1.99 | 1.76 |
| 134.21 | 0.27  | 0.84  | -0.45 | -0.19 | 0.97  | 1.00  | 0.93  | 1.50  | 1.23 | 1.71 | 1.70 |
| 143.17 | 0.26  | 0.34  | -0.55 | 1.26  | 1.14  | 0.72  | 0.15  | 0.73  | 1.90 | 1.66 | 1.92 |
| 152.74 | 2.54  | 0.05  | -0.69 | 1.67  | 0.23  | 0.26  | 1.02  | 0.64  | 1.56 | 1.48 | 1.60 |
| 162.97 | -0.03 | 0.64  | 0.62  | 0.14  | 0.03  | 0.68  | 1.21  | 0.35  | 0.81 | 2.30 | 1.33 |

|         |       |       |       |       |       |       |       |       |      |      |      |
|---------|-------|-------|-------|-------|-------|-------|-------|-------|------|------|------|
| 173.91  | 1.37  | -0.44 | -0.15 | 0.01  | 0.87  | 1.40  | -0.46 | 0.88  | 1.70 | 1.09 | 1.16 |
| 185.60  | 1.44  | -0.58 | -1.24 | 1.74  | 0.72  | -0.25 | 0.85  | 1.41  | 0.78 | 1.76 | 1.61 |
| 198.10  | -0.44 | 1.62  | -0.01 | -0.60 | 0.00  | 0.88  | 1.03  | 0.68  | 0.73 | 1.05 | 1.45 |
| 211.46  | 0.48  | -0.20 | -0.01 | 0.15  | 0.46  | 1.31  | 0.29  | 1.72  | 1.33 | 1.92 | 2.07 |
| 225.75  | 1.19  | 0.78  | 0.62  | 0.07  | 0.74  | 0.90  | 0.73  | 0.74  | 1.12 | 2.35 | 0.94 |
| 241.01  | -1.58 | 0.56  | 0.08  | -0.23 | 1.75  | 0.27  | 0.77  | 1.52  | 2.21 | 1.49 | 0.76 |
| 257.33  | -0.12 | 0.02  | -0.94 | 0.50  | 0.27  | 0.63  | 0.79  | 1.20  | 1.66 | 1.70 | 1.16 |
| 274.77  | -0.81 | -0.01 | -0.17 | 1.25  | -0.55 | 0.96  | -0.18 | 1.21  | 0.69 | 1.49 | 1.44 |
| 293.42  | 1.65  | 0.81  | -0.86 | 0.50  | 0.79  | 0.29  | -0.09 | 1.15  | 1.61 | 1.44 | 2.24 |
| 313.35  | -0.23 | 2.07  | 0.26  | -1.66 | -0.37 | 1.48  | 0.76  | 0.91  | 1.03 | 1.64 | 0.78 |
| 334.66  | -0.80 | 2.32  | 0.64  | 0.19  | 0.26  | 0.04  | 0.70  | 1.07  | 2.19 | 0.72 | 0.96 |
| 357.43  | -0.66 | 0.69  | -1.42 | 0.74  | 0.12  | 0.92  | 1.07  | 1.37  | 0.58 | 1.23 | 1.97 |
| 381.78  | 0.05  | 0.88  | 0.31  | -0.28 | 1.15  | 0.63  | -0.02 | 1.02  | 1.19 | 1.57 | 1.92 |
| 407.80  | 0.75  | -1.12 | 0.28  | 1.59  | -0.66 | 0.25  | 0.62  | 0.51  | 1.37 | 1.88 | 0.79 |
| 435.62  | 0.71  | -0.17 | -0.82 | -1.63 | 0.47  | 0.79  | -0.19 | 0.73  | 0.86 | 1.47 | 1.54 |
| 465.35  | -0.65 | -0.12 | 0.66  | 0.82  | 0.36  | 1.20  | 2.11  | 0.58  | 0.63 | 1.80 | 1.95 |
| 497.14  | 1.04  | 1.16  | -1.58 | 0.67  | 0.90  | -0.17 | 1.00  | 1.45  | 2.15 | 1.58 | 2.14 |
| 531.11  | -1.19 | 0.36  | 0.19  | -0.10 | 1.03  | -0.21 | 1.11  | 0.97  | 1.39 | 0.98 | 0.83 |
| 567.43  | -0.33 | -0.44 | 0.65  | 0.36  | 0.54  | 0.30  | 0.60  | 1.06  | 1.21 | 1.08 | 1.60 |
| 606.26  | -0.52 | 0.52  | 0.18  | 0.32  | 1.33  | 0.45  | 0.86  | 0.89  | 1.29 | 2.08 | 1.81 |
| 647.76  | 0.89  | 0.36  | -0.38 | 1.09  | 0.62  | 1.23  | 0.87  | 1.67  | 0.97 | 1.53 | 1.97 |
| 692.12  | -0.43 | -0.24 | -1.24 | 0.71  | 0.64  | 0.78  | 1.30  | 0.90  | 1.67 | 1.43 | 1.79 |
| 739.53  | -0.31 | 0.09  | 1.03  | -0.33 | 0.77  | 1.51  | 0.31  | 1.02  | 1.15 | 1.78 | 1.27 |
| 790.22  | -1.31 | 0.74  | -0.67 | 1.03  | 0.18  | 0.29  | 0.17  | 1.24  | 1.42 | 1.19 | 1.73 |
| 844.40  | -1.64 | 0.67  | 1.13  | -0.29 | -0.85 | 1.27  | 1.46  | -0.01 | 1.66 | 1.72 | 1.69 |
| 902.32  | 0.37  | 0.87  | -0.46 | 0.21  | 0.96  | 0.65  | 1.65  | 1.04  | 1.29 | 1.78 | 0.85 |
| 964.23  | -0.17 | 1.15  | -0.71 | 0.61  | 1.11  | 0.38  | 0.73  | 0.65  | 1.66 | 2.49 | 1.42 |
| 1030.41 | -0.31 | -0.86 | 0.83  | -0.25 | -0.38 | 0.98  | 0.86  | 1.83  | 1.15 | 1.84 | 1.73 |
| 1101.15 | 0.32  | -0.10 | -0.37 | 0.67  | -0.09 | 1.35  | 1.11  | 1.12  | 1.41 | 1.64 | 1.90 |
| 1176.77 | -0.65 | -0.01 | 1.13  | 0.71  | -0.21 | 0.44  | 0.88  | 1.54  | 0.55 | 1.54 | 1.35 |
| 1257.60 | 1.61  | 0.06  | -1.17 | 0.95  | 1.72  | 0.38  | 0.81  | 1.72  | 1.09 | 2.09 | 1.29 |
| 1344.00 | 0.50  | 1.61  | -0.12 | 0.36  | 0.59  | 0.24  | 0.89  | 0.97  | 1.28 | 2.19 | 1.97 |
| 1436.36 | -0.11 | 1.31  | 0.42  | -0.52 | 0.58  | 1.13  | 0.98  | 0.80  | 1.69 | 1.50 | 2.26 |
| 1535.09 | 1.04  | 0.13  | -0.59 | 0.43  | -0.78 | 0.16  | 1.03  | 1.76  | 1.41 | 1.30 | 0.97 |
| 1640.63 | -0.23 | 0.26  | -1.30 | -0.58 | 1.24  | 1.75  | -0.29 | 1.37  | 0.94 | 1.17 | 1.10 |
| 1753.44 | -0.30 | 0.68  | 1.46  | -0.06 | 0.41  | 0.68  | 0.71  | 1.04  | 1.30 | 1.65 | 1.42 |
| 1874.02 | -0.36 | 0.41  | -0.41 | 0.16  | -0.15 | 0.42  | 1.19  | 0.63  | 1.67 | 1.53 | 1.25 |
| 2002.92 | 0.02  | 1.07  | 0.73  | 0.67  | -0.21 | 0.85  | 0.54  | 0.27  | 1.57 | 1.33 | 0.72 |
| 2140.71 | -1.20 | 0.08  | -0.05 | 0.21  | 1.15  | 0.39  | 1.02  | 0.91  | 1.67 | 2.82 | 1.61 |
| 2288.00 | -0.10 | 0.61  | -1.20 | 1.42  | 0.67  | 0.75  | 0.81  | 0.87  | 1.31 | 2.25 | 1.78 |
| 2445.44 | -2.14 | -1.11 | -0.43 | 1.11  | 0.97  | 0.64  | 1.04  | 0.57  | 1.74 | 1.75 | 1.41 |
| 2613.73 | 0.59  | -0.19 | -0.87 | 0.30  | 0.87  | 0.81  | 0.21  | 0.54  | 0.76 | 2.00 | 1.30 |
| 2793.63 | 0.49  | 0.43  | -0.52 | 0.25  | 0.66  | 0.90  | 1.11  | 0.46  | 1.77 | 1.79 | 1.29 |
| 2985.93 | -1.28 | -1.56 | 0.43  | 0.83  | -0.73 | 1.24  | 1.14  | 1.76  | 1.77 | 1.49 | 2.45 |
| 3191.49 | 0.50  | 1.54  | 0.54  | -0.18 | -0.35 | 0.58  | 0.37  | 1.40  | 2.44 | 1.98 | 2.13 |
| 3411.21 | 1.16  | 0.81  | -0.85 | 1.36  | 0.21  | 0.19  | 2.59  | 1.99  | 1.04 | 2.05 | 2.74 |
| 3646.09 | 0.90  | 0.65  | 0.29  | 0.26  | 0.79  | 2.02  | 1.48  | 2.45  | 1.93 | 2.33 | 2.08 |
| 3897.16 | 1.80  | -2.02 | -0.24 | 1.88  | 0.74  | 0.14  | 1.55  | 2.38  | 1.43 | 1.70 | 2.19 |

| Wavelength<br>(nm) | 349.75      | 351.1<br>8 | 352.6<br>0 | 354.0<br>3 | 355.45 | 356.87 | 358.3<br>0 | 359.7<br>2 | 361.1<br>5 | 362.57      | 363.99      |
|--------------------|-------------|------------|------------|------------|--------|--------|------------|------------|------------|-------------|-------------|
| -2.74              | 0.24        | -0.09      | -0.38      | 0.26       | -0.65  | -0.04  | -0.11      | -0.29      | 0.00       | 0.17        | 0.33        |
| -2.24              | -0.47       | 0.18       | 0.04       | 0.13       | 0.03   | -0.05  | 0.18       | 0.10       | -0.02      | 0.22        | 0.21        |
| -1.74              | -0.30       | -0.39      | -0.37      | 0.01       | 0.08   | -0.34  | -0.04      | 0.19       | -0.18      | -0.18       | -0.04       |
| -1.24              | 0.28        | 0.57       | 0.40       | -0.35      | 0.71   | -0.22  | -0.04      | -0.17      | 0.14       | 0.02        | 0.03        |
| -0.74              | -0.10       | -0.09      | -0.23      | 0.31       | -0.05  | 0.24   | 0.08       | 0.09       | 0.02       | -0.11       | -0.27       |
| -0.24              | 0.35        | -0.10      | 0.26       | 0.11       | 0.05   | 0.04   | 0.04       | 0.15       | -0.17      | -0.18       | -0.21       |
| -0.14              | 0.05        | 0.05       | 0.19       | -0.29      | 0.04   | 0.22   | -0.22      | 0.18       | 0.18       | 0.07        | -0.04       |
| -0.04              | -0.04       | -0.13      | 0.09       | -0.19      | -0.22  | 0.16   | 0.11       | -0.25      | 0.01       | -0.03       | -0.02       |
| 0.06               | -0.43       | -0.03      | 0.05       | -0.35      | 0.06   | -0.35  | 0.05       | 0.40       | -0.22      | -0.31       | -0.23       |
| 0.16               | 0.51        | -0.17      | 0.74       | 0.65       | 0.01   | -0.45  | -0.01      | 0.03       | 0.14       | 0.33        | 0.06        |
| 0.26               | 0.28        | 0.17       | 0.01       | 0.17       | 0.04   | -0.19  | 0.02       | 0.37       | 0.08       | 0.08        | -0.10       |
| 0.31               | 0.40        | -0.07      | 0.06       | 0.33       | 0.25   | -0.28  | -0.01      | -0.05      | -0.19      | -0.53       | -0.24       |
| 0.36               | 0.04        | -0.15      | 0.06       | 0.06       | -0.41  | -0.01  | -0.24      | -0.10      | -0.04      | -0.14       | -0.38       |
| 0.41               | 0.19        | 0.08       | 0.02       | 0.55       | 0.21   | 0.34   | 0.06       | 0.14       | 0.26       | -0.05       | -0.19       |
| 0.46               | -0.11       | 0.16       | -0.31      | 0.50       | -0.02  | -0.28  | 0.15       | 0.10       | -0.16      | -0.09       | -0.40       |
| 0.51               | -8.52       | -1.16      | -0.82      | 0.58       | 0.16   | -0.24  | -0.07      | 0.06       | -0.20      | 0.08        | 0.13        |
| 0.56               | -49.64      | -64.37     | -57.26     | -37.01     | -16.14 | -4.83  | -0.72      | -0.19      | 0.24       | 0.26        | 0.00        |
| 0.61               | 173.94      | 120.9<br>0 | 54.34      | -10.81     | -57.30 | -78.07 | -73.14     | -49.18     | -21.59     | -2.98       | 0.98        |
| 0.66               | 201.19      | 249.0<br>8 | 275.1<br>3 | 273.8<br>5 | 244.44 | 186.26 | 105.0<br>7 | 18.88      | -50.68     | -84.24      | -82.54      |
| 0.71               | -<br>116.10 | -74.30     | -1.38      | 89.95      | 188.43 | 274.83 | 330.2<br>8 | 345.3<br>6 | 329.1<br>1 | 297.31      | 252.72      |
| 0.76               | 1.92        | -8.59      | -37.51     | -83.96     | 115.25 | 109.66 | -64.21     | 7.25       | 89.13      | 168.36      | 237.34      |
| 0.81               | 4.78        | 6.39       | 9.69       | 12.28      | 10.27  | 4.49   | -3.18      | -29.78     | -78.81     | -<br>125.01 | -<br>141.12 |
| 0.86               | 6.66        | 7.79       | 7.93       | 6.02       | 6.41   | 6.88   | 8.53       | 10.99      | 12.60      | 10.38       | 7.67        |
| 0.91               | 6.79        | 6.18       | 6.42       | 6.97       | 6.71   | 7.46   | 8.65       | 9.89       | 7.92       | 6.54        | 6.79        |
| 0.96               | 6.24        | 5.93       | 5.98       | 6.25       | 7.73   | 8.02   | 7.56       | 7.70       | 8.01       | 8.36        | 8.32        |
| 1.01               | 4.78        | 5.42       | 6.71       | 7.43       | 7.44   | 8.34   | 8.65       | 7.61       | 7.85       | 9.28        | 10.16       |
| 1.06               | 5.56        | 6.11       | 6.13       | 6.94       | 6.93   | 6.26   | 6.94       | 7.77       | 8.32       | 8.47        | 8.66        |
| 1.11               | 5.26        | 5.55       | 5.28       | 6.13       | 6.50   | 6.63   | 6.91       | 7.18       | 7.36       | 7.46        | 7.50        |
| 1.16               | 4.60        | 4.65       | 5.66       | 5.68       | 5.78   | 6.70   | 7.46       | 7.29       | 6.70       | 7.24        | 7.93        |
| 1.21               | 5.12        | 4.93       | 5.16       | 6.19       | 6.62   | 6.64   | 6.42       | 6.61       | 6.90       | 7.19        | 7.27        |
| 1.26               | 4.53        | 4.74       | 6.02       | 5.92       | 6.48   | 6.65   | 6.36       | 6.59       | 6.68       | 7.60        | 7.44        |
| 1.31               | 4.55        | 4.59       | 5.55       | 5.68       | 5.48   | 6.09   | 6.02       | 7.22       | 6.79       | 6.70        | 6.81        |
| 1.36               | 4.20        | 4.40       | 4.44       | 4.90       | 5.36   | 5.93   | 5.97       | 5.81       | 6.24       | 6.41        | 6.31        |
| 1.41               | 4.20        | 4.43       | 4.90       | 5.46       | 5.67   | 6.00   | 5.84       | 5.77       | 5.86       | 6.50        | 6.50        |
| 1.46               | 4.33        | 4.31       | 5.06       | 5.91       | 5.95   | 5.52   | 5.87       | 6.43       | 6.35       | 6.39        | 5.87        |
| 1.51               | 4.02        | 4.81       | 4.82       | 4.83       | 5.55   | 5.70   | 6.61       | 5.68       | 6.70       | 6.59        | 6.27        |
| 1.56               | 4.07        | 4.62       | 4.83       | 4.83       | 5.89   | 5.61   | 5.86       | 6.02       | 5.62       | 6.58        | 6.89        |
| 1.61               | 4.60        | 3.98       | 4.22       | 5.07       | 5.23   | 4.88   | 5.53       | 5.89       | 6.08       | 6.09        | 5.59        |
| 1.66               | 4.46        | 4.52       | 5.19       | 5.35       | 5.48   | 5.12   | 5.49       | 6.14       | 6.47       | 6.42        | 6.35        |
| 1.71               | 4.28        | 4.41       | 4.72       | 4.92       | 5.23   | 5.59   | 5.57       | 6.50       | 6.09       | 5.97        | 5.98        |
| 1.76               | 5.60        | 4.86       | 4.30       | 5.14       | 6.16   | 5.65   | 5.72       | 5.56       | 6.29       | 6.69        | 6.04        |
| 1.81               | 3.81        | 3.95       | 4.51       | 4.35       | 5.10   | 5.22   | 5.23       | 4.95       | 5.36       | 6.12        | 5.77        |
| 1.86               | 4.24        | 3.66       | 4.88       | 4.38       | 5.09   | 5.07   | 5.24       | 5.43       | 5.52       | 5.92        | 5.78        |
| 1.91               | 3.74        | 4.15       | 4.03       | 4.28       | 4.93   | 5.02   | 5.21       | 5.39       | 5.21       | 5.86        | 5.15        |
| 1.96               | 3.56        | 3.91       | 4.54       | 5.04       | 5.42   | 5.60   | 5.45       | 5.66       | 5.56       | 5.87        | 5.81        |

|      |      |      |      |      |      |      |      |      |      |      |      |
|------|------|------|------|------|------|------|------|------|------|------|------|
| 2.01 | 4.30 | 4.74 | 4.51 | 5.08 | 5.56 | 4.95 | 5.53 | 5.78 | 5.70 | 6.20 | 5.37 |
| 2.06 | 4.04 | 4.13 | 4.59 | 4.77 | 5.31 | 5.18 | 5.31 | 5.45 | 5.28 | 5.61 | 6.18 |
| 2.11 | 3.10 | 4.30 | 4.11 | 3.77 | 5.71 | 5.35 | 5.05 | 5.33 | 5.58 | 5.46 | 5.14 |
| 2.16 | 3.99 | 3.83 | 3.20 | 4.59 | 5.25 | 5.10 | 4.89 | 5.50 | 5.40 | 5.16 | 5.48 |
| 2.21 | 3.93 | 3.53 | 4.71 | 5.11 | 5.28 | 5.15 | 5.74 | 5.27 | 5.56 | 6.02 | 6.57 |
| 2.26 | 4.03 | 4.14 | 4.53 | 5.10 | 5.13 | 4.90 | 5.73 | 5.82 | 6.23 | 6.03 | 6.18 |
| 2.31 | 3.99 | 3.44 | 4.54 | 4.49 | 4.97 | 4.89 | 4.93 | 5.44 | 5.11 | 5.37 | 5.36 |
| 2.36 | 4.18 | 3.32 | 3.96 | 4.35 | 4.51 | 5.15 | 5.32 | 4.97 | 5.06 | 5.47 | 5.28 |
| 2.41 | 3.46 | 3.72 | 3.98 | 4.56 | 4.90 | 4.93 | 4.91 | 5.50 | 5.82 | 6.05 | 5.43 |
| 2.46 | 3.35 | 4.21 | 3.81 | 4.08 | 4.66 | 5.05 | 4.83 | 4.89 | 5.73 | 5.74 | 5.38 |
| 2.51 | 4.23 | 4.18 | 4.08 | 5.68 | 5.38 | 4.89 | 5.23 | 5.66 | 5.44 | 5.81 | 5.96 |
| 2.56 | 3.33 | 3.98 | 3.96 | 4.51 | 4.63 | 4.57 | 4.99 | 5.71 | 4.97 | 5.21 | 5.27 |
| 2.61 | 3.20 | 3.64 | 4.14 | 3.91 | 5.19 | 4.70 | 4.93 | 4.53 | 5.24 | 5.69 | 5.41 |
| 2.66 | 3.24 | 4.10 | 3.83 | 4.27 | 4.85 | 5.10 | 4.77 | 4.88 | 5.02 | 5.33 | 5.42 |
| 2.71 | 3.21 | 4.34 | 4.42 | 4.80 | 5.09 | 5.51 | 5.41 | 5.10 | 5.34 | 5.93 | 5.44 |
| 2.76 | 4.28 | 4.35 | 4.11 | 4.48 | 5.14 | 5.29 | 5.05 | 5.23 | 5.53 | 5.78 | 5.58 |
| 2.81 | 3.05 | 4.52 | 4.25 | 4.54 | 4.61 | 4.46 | 4.56 | 4.61 | 5.45 | 4.96 | 5.16 |
| 2.86 | 3.12 | 3.95 | 4.14 | 3.69 | 5.06 | 4.62 | 4.59 | 4.68 | 5.18 | 5.44 | 4.99 |
| 2.91 | 3.85 | 3.71 | 4.31 | 4.81 | 4.57 | 4.80 | 5.28 | 5.02 | 4.97 | 5.16 | 5.00 |
| 2.96 | 4.61 | 4.24 | 4.39 | 4.87 | 4.76 | 5.02 | 4.96 | 5.59 | 5.17 | 5.30 | 5.43 |
| 3.01 | 4.27 | 3.80 | 4.90 | 3.66 | 5.37 | 4.98 | 5.19 | 5.41 | 5.13 | 5.58 | 5.79 |
| 3.06 | 3.84 | 3.92 | 4.30 | 4.43 | 4.96 | 4.72 | 5.04 | 5.49 | 5.14 | 5.63 | 5.68 |
| 3.11 | 3.31 | 3.91 | 4.31 | 4.17 | 4.35 | 4.71 | 4.80 | 4.58 | 5.35 | 5.50 | 4.88 |
| 3.16 | 3.27 | 4.17 | 3.96 | 3.95 | 4.40 | 4.48 | 4.99 | 4.79 | 4.84 | 5.34 | 5.15 |
| 3.21 | 3.46 | 3.18 | 4.20 | 3.64 | 4.49 | 4.95 | 4.83 | 5.26 | 5.48 | 5.61 | 5.50 |
| 3.26 | 3.23 | 3.35 | 3.47 | 4.36 | 4.34 | 4.63 | 4.65 | 5.54 | 5.04 | 5.13 | 5.39 |
| 3.31 | 3.48 | 4.05 | 4.37 | 3.95 | 4.86 | 4.30 | 5.09 | 4.69 | 5.07 | 5.55 | 5.63 |
| 3.36 | 3.47 | 3.82 | 4.38 | 3.42 | 5.22 | 4.46 | 5.08 | 5.04 | 5.62 | 5.22 | 4.86 |
| 3.41 | 3.36 | 3.97 | 4.32 | 4.21 | 4.89 | 4.77 | 4.38 | 5.23 | 5.38 | 5.10 | 5.20 |
| 3.46 | 3.90 | 3.99 | 3.33 | 4.35 | 5.01 | 5.12 | 4.54 | 5.48 | 5.17 | 4.97 | 5.32 |
| 3.51 | 3.55 | 3.80 | 3.99 | 4.82 | 4.84 | 4.68 | 4.77 | 4.96 | 4.94 | 5.18 | 5.37 |
| 3.56 | 3.65 | 3.84 | 4.14 | 4.00 | 4.51 | 4.15 | 4.51 | 4.78 | 4.78 | 5.50 | 5.46 |
| 3.61 | 3.10 | 3.91 | 4.34 | 4.05 | 4.08 | 4.57 | 4.58 | 4.95 | 4.68 | 4.81 | 4.40 |
| 3.66 | 4.04 | 4.20 | 4.37 | 4.01 | 5.02 | 4.79 | 5.15 | 4.86 | 4.84 | 5.41 | 5.72 |
| 3.71 | 3.65 | 4.08 | 4.40 | 4.69 | 5.02 | 4.43 | 4.98 | 5.64 | 5.06 | 5.14 | 5.26 |
| 3.76 | 4.58 | 3.80 | 4.06 | 4.60 | 4.99 | 4.37 | 5.30 | 5.18 | 5.42 | 5.48 | 5.71 |
| 3.81 | 3.98 | 3.57 | 3.19 | 4.44 | 4.68 | 4.52 | 4.52 | 4.57 | 4.75 | 4.74 | 4.87 |
| 3.86 | 3.83 | 3.57 | 3.97 | 3.64 | 4.17 | 4.41 | 4.50 | 4.53 | 4.76 | 4.79 | 4.81 |
| 3.91 | 3.64 | 3.60 | 4.10 | 4.83 | 4.82 | 4.31 | 4.81 | 5.32 | 5.39 | 5.21 | 5.50 |
| 3.96 | 4.36 | 3.83 | 4.27 | 5.06 | 4.49 | 4.41 | 4.88 | 5.36 | 5.33 | 5.55 | 5.42 |
| 4.01 | 4.05 | 3.95 | 4.73 | 4.40 | 4.30 | 4.93 | 4.83 | 5.08 | 5.33 | 5.22 | 5.36 |
| 4.06 | 3.47 | 3.12 | 4.32 | 4.40 | 4.28 | 4.63 | 4.70 | 4.76 | 4.45 | 4.77 | 5.22 |
| 4.11 | 3.44 | 3.50 | 3.90 | 3.89 | 4.62 | 4.26 | 4.61 | 5.32 | 4.61 | 4.44 | 4.85 |
| 4.16 | 3.60 | 3.50 | 4.02 | 3.93 | 5.36 | 4.23 | 4.69 | 4.91 | 5.00 | 4.94 | 5.21 |
| 4.21 | 3.61 | 4.18 | 4.59 | 5.32 | 5.06 | 4.95 | 4.96 | 5.16 | 5.65 | 5.76 | 5.56 |
| 4.26 | 4.05 | 4.03 | 4.44 | 4.80 | 5.05 | 4.85 | 5.33 | 5.37 | 5.33 | 5.33 | 4.94 |
| 4.31 | 3.59 | 3.66 | 3.27 | 4.37 | 4.29 | 3.95 | 4.24 | 4.20 | 4.83 | 4.51 | 4.79 |
| 4.36 | 3.60 | 3.24 | 3.01 | 3.79 | 4.04 | 3.67 | 4.66 | 4.65 | 4.65 | 4.56 | 4.53 |
| 4.41 | 3.56 | 3.71 | 4.01 | 4.00 | 4.83 | 4.51 | 4.80 | 4.97 | 5.04 | 4.94 | 4.97 |
| 4.46 | 4.05 | 3.75 | 4.64 | 4.36 | 4.74 | 4.78 | 5.34 | 4.77 | 5.31 | 5.13 | 5.39 |

|       |      |      |      |      |      |      |      |      |      |      |      |
|-------|------|------|------|------|------|------|------|------|------|------|------|
| 4.51  | 3.79 | 4.02 | 4.19 | 4.50 | 4.18 | 4.96 | 4.86 | 5.01 | 5.18 | 5.14 | 4.85 |
| 4.56  | 3.85 | 4.07 | 3.99 | 4.38 | 4.62 | 4.01 | 4.78 | 4.87 | 4.92 | 5.35 | 5.02 |
| 4.61  | 3.54 | 3.81 | 4.13 | 4.54 | 4.27 | 4.08 | 4.77 | 4.76 | 4.54 | 5.15 | 4.67 |
| 4.66  | 3.30 | 3.35 | 4.08 | 3.79 | 3.79 | 3.90 | 4.71 | 4.78 | 4.87 | 4.78 | 4.97 |
| 4.71  | 3.96 | 3.67 | 4.63 | 4.92 | 5.23 | 4.69 | 5.36 | 5.44 | 5.66 | 5.63 | 5.60 |
| 4.76  | 3.70 | 3.79 | 4.41 | 4.27 | 4.61 | 4.43 | 5.17 | 5.01 | 5.21 | 5.60 | 5.62 |
| 4.81  | 4.00 | 3.74 | 3.90 | 4.02 | 4.54 | 3.81 | 4.70 | 4.52 | 4.66 | 4.68 | 5.11 |
| 4.86  | 2.94 | 3.35 | 4.10 | 3.73 | 4.64 | 4.44 | 4.72 | 4.71 | 4.72 | 4.88 | 4.84 |
| 4.91  | 3.38 | 3.85 | 3.80 | 4.06 | 4.50 | 4.62 | 4.49 | 4.56 | 5.33 | 5.02 | 5.25 |
| 4.96  | 3.48 | 3.45 | 3.65 | 4.40 | 4.70 | 4.52 | 4.71 | 4.59 | 5.08 | 5.01 | 4.90 |
| 5.01  | 3.26 | 2.94 | 4.24 | 4.02 | 4.06 | 4.71 | 4.75 | 5.17 | 4.87 | 5.41 | 5.21 |
| 5.06  | 3.61 | 3.76 | 3.94 | 4.41 | 4.14 | 3.89 | 4.67 | 4.96 | 4.65 | 4.74 | 5.20 |
| 5.11  | 2.53 | 3.84 | 3.46 | 3.80 | 4.12 | 3.83 | 4.17 | 4.50 | 4.53 | 4.83 | 4.47 |
| 5.16  | 3.40 | 4.03 | 3.26 | 3.82 | 4.40 | 4.34 | 4.37 | 4.09 | 4.60 | 4.98 | 4.50 |
| 5.21  | 3.47 | 3.83 | 3.59 | 4.37 | 4.02 | 4.54 | 4.32 | 4.81 | 4.41 | 4.40 | 4.58 |
| 5.26  | 3.41 | 3.57 | 4.29 | 4.08 | 4.63 | 4.81 | 5.09 | 4.74 | 5.00 | 5.23 | 4.92 |
| 5.31  | 3.10 | 3.61 | 4.05 | 3.89 | 4.50 | 4.13 | 5.01 | 4.27 | 4.69 | 4.41 | 4.84 |
| 5.38  | 3.00 | 3.82 | 3.48 | 3.94 | 4.36 | 4.01 | 4.64 | 4.91 | 4.52 | 4.85 | 4.61 |
| 5.45  | 3.43 | 3.79 | 4.25 | 4.50 | 5.07 | 5.00 | 5.10 | 4.84 | 4.96 | 4.94 | 4.82 |
| 5.53  | 2.32 | 3.47 | 3.61 | 4.11 | 4.62 | 4.20 | 4.09 | 4.73 | 4.90 | 5.01 | 4.99 |
| 5.61  | 3.13 | 4.23 | 3.81 | 4.08 | 4.30 | 4.51 | 4.53 | 4.87 | 5.64 | 5.01 | 5.05 |
| 5.70  | 3.14 | 3.57 | 3.60 | 4.12 | 4.33 | 4.06 | 4.51 | 4.66 | 4.68 | 4.73 | 5.02 |
| 5.80  | 3.61 | 3.37 | 3.05 | 4.08 | 4.03 | 4.03 | 4.35 | 5.01 | 4.80 | 4.64 | 5.19 |
| 5.90  | 2.94 | 3.73 | 4.21 | 3.94 | 3.85 | 4.23 | 4.08 | 3.98 | 4.28 | 4.77 | 4.50 |
| 6.01  | 3.48 | 3.94 | 4.17 | 3.60 | 3.85 | 4.59 | 4.80 | 5.05 | 5.01 | 4.95 | 5.31 |
| 6.13  | 3.44 | 3.74 | 4.10 | 3.73 | 4.18 | 4.79 | 4.45 | 4.76 | 4.64 | 4.64 | 4.67 |
| 6.25  | 2.48 | 2.93 | 3.40 | 3.27 | 4.31 | 4.12 | 4.06 | 4.77 | 4.31 | 4.65 | 4.38 |
| 6.39  | 2.58 | 3.47 | 3.50 | 3.96 | 3.85 | 3.98 | 4.29 | 4.11 | 4.20 | 4.36 | 4.76 |
| 6.53  | 3.21 | 3.30 | 3.44 | 4.29 | 3.95 | 4.09 | 4.02 | 4.26 | 4.32 | 4.24 | 4.42 |
| 6.69  | 3.52 | 3.74 | 3.79 | 4.09 | 4.17 | 4.62 | 4.49 | 4.66 | 4.93 | 5.15 | 4.84 |
| 6.85  | 3.65 | 3.63 | 3.63 | 3.61 | 3.95 | 4.74 | 4.50 | 4.45 | 4.25 | 4.36 | 4.35 |
| 7.03  | 3.07 | 2.72 | 3.56 | 3.38 | 3.42 | 4.14 | 3.98 | 4.21 | 3.68 | 3.88 | 4.36 |
| 7.21  | 2.46 | 3.23 | 3.67 | 3.23 | 3.61 | 3.99 | 3.88 | 3.88 | 4.26 | 4.32 | 4.48 |
| 7.41  | 3.46 | 3.02 | 3.74 | 3.62 | 3.72 | 4.14 | 4.40 | 4.41 | 4.52 | 4.80 | 4.54 |
| 7.63  | 4.25 | 3.84 | 3.74 | 4.10 | 4.04 | 4.26 | 4.90 | 4.34 | 4.20 | 4.75 | 4.93 |
| 7.86  | 2.92 | 3.32 | 3.84 | 3.58 | 3.94 | 3.97 | 4.34 | 4.30 | 4.38 | 4.62 | 4.24 |
| 8.10  | 2.62 | 2.66 | 2.62 | 3.61 | 4.09 | 3.59 | 3.82 | 4.28 | 4.14 | 4.39 | 4.57 |
| 8.36  | 3.21 | 2.93 | 3.00 | 2.90 | 3.32 | 3.16 | 3.93 | 3.98 | 3.80 | 3.98 | 3.93 |
| 8.64  | 3.25 | 3.29 | 3.11 | 3.41 | 3.57 | 4.15 | 4.28 | 4.24 | 4.22 | 4.15 | 4.72 |
| 8.94  | 2.82 | 3.52 | 3.81 | 3.64 | 4.15 | 3.53 | 4.53 | 4.68 | 4.51 | 4.65 | 4.43 |
| 9.26  | 3.02 | 3.55 | 4.01 | 3.01 | 4.17 | 4.42 | 4.54 | 4.54 | 4.05 | 4.86 | 4.50 |
| 9.60  | 2.34 | 2.85 | 2.74 | 3.12 | 3.99 | 3.71 | 3.30 | 4.14 | 3.87 | 4.30 | 3.81 |
| 9.97  | 2.30 | 3.12 | 3.09 | 3.01 | 3.10 | 2.86 | 3.54 | 3.51 | 3.81 | 3.76 | 3.88 |
| 10.36 | 3.02 | 3.21 | 3.23 | 2.99 | 3.15 | 3.83 | 3.70 | 4.28 | 4.19 | 4.43 | 4.04 |
| 10.77 | 2.94 | 2.97 | 3.56 | 3.57 | 3.28 | 3.36 | 3.70 | 4.47 | 4.25 | 4.28 | 4.51 |
| 11.22 | 2.56 | 2.97 | 2.83 | 3.41 | 3.34 | 3.75 | 3.43 | 4.10 | 3.87 | 4.14 | 4.36 |
| 11.70 | 2.43 | 2.18 | 3.63 | 2.88 | 2.88 | 3.40 | 3.68 | 3.95 | 3.97 | 3.90 | 4.04 |
| 12.21 | 1.99 | 1.95 | 2.70 | 2.39 | 3.56 | 3.00 | 2.63 | 3.39 | 3.38 | 3.65 | 3.40 |
| 12.75 | 1.94 | 2.44 | 3.12 | 3.00 | 3.49 | 3.51 | 3.35 | 3.60 | 3.79 | 3.78 | 3.67 |
| 13.33 | 1.69 | 2.59 | 2.65 | 2.98 | 3.19 | 3.27 | 4.10 | 3.94 | 3.93 | 4.27 | 3.78 |

|        |      |      |      |      |      |      |      |      |      |      |      |
|--------|------|------|------|------|------|------|------|------|------|------|------|
| 13.95  | 2.98 | 2.82 | 2.90 | 3.24 | 3.65 | 3.42 | 3.82 | 3.65 | 3.83 | 4.03 | 4.17 |
| 14.62  | 1.91 | 2.94 | 2.67 | 3.03 | 3.24 | 3.57 | 3.30 | 3.52 | 3.12 | 3.62 | 3.53 |
| 15.33  | 2.12 | 2.38 | 2.59 | 2.44 | 3.39 | 2.96 | 3.11 | 3.55 | 3.48 | 3.52 | 3.55 |
| 16.09  | 1.78 | 2.36 | 2.50 | 2.87 | 3.21 | 3.22 | 3.46 | 3.25 | 3.55 | 3.94 | 3.95 |
| 16.90  | 2.22 | 3.23 | 2.56 | 2.42 | 3.07 | 2.88 | 3.34 | 3.39 | 4.02 | 4.13 | 3.93 |
| 17.77  | 1.86 | 2.03 | 2.13 | 2.28 | 3.22 | 2.99 | 2.93 | 3.32 | 3.64 | 3.67 | 3.40 |
| 18.70  | 1.95 | 3.79 | 2.44 | 2.60 | 3.10 | 2.99 | 3.27 | 3.51 | 3.65 | 4.06 | 3.60 |
| 19.69  | 2.03 | 1.89 | 2.43 | 2.60 | 3.11 | 2.91 | 2.89 | 2.88 | 3.25 | 3.36 | 3.18 |
| 20.75  | 2.11 | 2.52 | 2.16 | 2.54 | 3.15 | 2.64 | 2.88 | 3.38 | 2.99 | 3.82 | 3.82 |
| 21.89  | 2.67 | 2.32 | 2.82 | 3.34 | 3.17 | 3.17 | 3.17 | 3.09 | 3.43 | 3.57 | 3.38 |
| 23.10  | 2.27 | 2.39 | 2.89 | 3.30 | 3.53 | 3.18 | 3.71 | 4.23 | 3.73 | 4.07 | 4.38 |
| 24.39  | 2.15 | 2.58 | 2.38 | 2.68 | 2.81 | 3.10 | 3.53 | 3.53 | 3.33 | 3.61 | 3.17 |
| 25.78  | 1.60 | 2.16 | 2.59 | 2.45 | 2.82 | 2.61 | 3.13 | 3.33 | 2.95 | 3.14 | 3.50 |
| 27.26  | 1.91 | 2.31 | 2.58 | 2.39 | 2.98 | 2.91 | 3.59 | 3.24 | 3.08 | 3.21 | 2.78 |
| 28.84  | 2.35 | 2.16 | 2.67 | 2.55 | 3.04 | 2.88 | 2.29 | 2.77 | 3.35 | 3.24 | 3.53 |
| 30.53  | 2.33 | 2.38 | 2.59 | 3.06 | 3.19 | 2.92 | 3.01 | 3.68 | 3.51 | 3.40 | 3.73 |
| 32.34  | 2.20 | 2.90 | 2.42 | 2.03 | 2.98 | 2.88 | 3.41 | 3.25 | 3.00 | 3.28 | 3.60 |
| 34.27  | 2.07 | 2.32 | 2.28 | 2.62 | 3.02 | 2.61 | 3.19 | 3.14 | 3.40 | 3.65 | 3.43 |
| 36.34  | 1.89 | 1.60 | 2.29 | 2.71 | 2.98 | 2.95 | 2.96 | 2.99 | 2.93 | 3.73 | 3.49 |
| 38.55  | 1.94 | 2.54 | 1.81 | 2.35 | 2.56 | 3.00 | 2.95 | 3.74 | 3.46 | 3.44 | 3.33 |
| 40.91  | 2.29 | 2.02 | 2.30 | 2.51 | 3.19 | 2.56 | 2.99 | 3.26 | 3.43 | 3.38 | 3.23 |
| 43.43  | 1.29 | 1.91 | 2.13 | 2.91 | 2.55 | 2.57 | 2.59 | 2.85 | 2.90 | 3.08 | 3.02 |
| 46.13  | 2.48 | 2.25 | 2.57 | 2.95 | 2.83 | 2.55 | 2.74 | 3.20 | 3.34 | 3.59 | 3.38 |
| 49.01  | 1.91 | 2.39 | 2.50 | 2.56 | 2.57 | 2.87 | 3.49 | 3.14 | 3.40 | 3.14 | 3.52 |
| 52.09  | 1.25 | 2.25 | 2.64 | 2.71 | 2.88 | 2.44 | 2.68 | 2.89 | 3.18 | 3.29 | 3.08 |
| 55.39  | 1.95 | 2.00 | 1.57 | 2.17 | 2.26 | 2.32 | 2.61 | 3.20 | 2.74 | 3.38 | 3.48 |
| 58.91  | 1.83 | 2.34 | 2.61 | 2.76 | 2.63 | 2.97 | 3.09 | 3.39 | 3.37 | 3.58 | 3.24 |
| 62.68  | 1.55 | 1.89 | 2.17 | 2.43 | 2.94 | 3.02 | 2.69 | 2.80 | 2.66 | 3.56 | 2.63 |
| 66.70  | 2.10 | 2.43 | 2.22 | 2.70 | 3.15 | 2.80 | 2.90 | 3.49 | 3.03 | 3.11 | 3.11 |
| 71.00  | 1.55 | 2.66 | 2.40 | 2.26 | 2.43 | 2.90 | 2.71 | 2.82 | 3.30 | 3.80 | 3.09 |
| 75.60  | 2.19 | 1.80 | 2.46 | 3.02 | 2.95 | 2.35 | 3.00 | 3.10 | 3.11 | 3.55 | 3.16 |
| 80.51  | 1.92 | 2.07 | 2.32 | 2.50 | 2.79 | 3.18 | 3.33 | 3.23 | 3.34 | 3.13 | 3.33 |
| 85.77  | 2.41 | 2.19 | 2.70 | 2.46 | 2.71 | 2.82 | 3.00 | 2.86 | 3.05 | 3.36 | 3.11 |
| 91.38  | 2.28 | 2.53 | 2.06 | 2.41 | 2.54 | 2.80 | 3.41 | 2.92 | 3.19 | 3.36 | 3.24 |
| 97.39  | 2.17 | 1.77 | 2.43 | 2.28 | 2.42 | 2.96 | 3.13 | 3.05 | 3.03 | 2.88 | 2.93 |
| 103.80 | 2.31 | 2.71 | 2.65 | 3.09 | 2.61 | 2.54 | 3.20 | 3.34 | 3.56 | 3.57 | 3.77 |
| 110.66 | 1.78 | 2.26 | 2.25 | 2.94 | 3.04 | 3.11 | 3.07 | 2.91 | 3.52 | 3.45 | 3.67 |
| 117.99 | 1.28 | 1.16 | 1.62 | 2.48 | 2.82 | 2.32 | 2.60 | 2.74 | 3.23 | 3.20 | 2.88 |
| 125.83 | 2.32 | 2.21 | 2.21 | 2.20 | 2.94 | 2.70 | 2.75 | 3.13 | 3.80 | 3.48 | 3.53 |
| 134.21 | 2.50 | 1.47 | 2.29 | 2.85 | 2.60 | 2.68 | 2.87 | 2.98 | 3.24 | 2.99 | 2.99 |
| 143.17 | 2.19 | 2.31 | 2.79 | 2.61 | 3.77 | 2.73 | 3.58 | 3.33 | 3.37 | 3.50 | 3.79 |
| 152.74 | 1.72 | 2.00 | 2.30 | 2.99 | 2.91 | 2.75 | 3.05 | 3.46 | 3.07 | 3.35 | 3.29 |
| 162.97 | 1.39 | 2.32 | 2.38 | 2.39 | 3.27 | 2.46 | 2.62 | 3.33 | 3.62 | 3.23 | 2.96 |
| 173.91 | 1.72 | 2.11 | 2.10 | 2.19 | 2.89 | 2.50 | 2.77 | 2.90 | 3.14 | 3.08 | 3.01 |
| 185.60 | 1.74 | 1.48 | 2.27 | 2.57 | 2.75 | 2.67 | 3.04 | 2.63 | 2.95 | 3.21 | 3.36 |
| 198.10 | 2.82 | 2.26 | 2.56 | 2.79 | 2.41 | 2.60 | 2.91 | 3.61 | 3.21 | 3.32 | 3.22 |
| 211.46 | 2.18 | 2.24 | 2.30 | 2.82 | 2.72 | 3.01 | 3.87 | 3.28 | 3.39 | 3.62 | 3.59 |
| 225.75 | 1.72 | 1.31 | 2.29 | 2.04 | 2.52 | 2.56 | 2.96 | 3.25 | 2.59 | 3.09 | 2.81 |
| 241.01 | 1.97 | 1.94 | 2.79 | 2.33 | 2.79 | 2.29 | 2.61 | 2.80 | 3.03 | 3.60 | 2.88 |
| 257.33 | 1.00 | 1.53 | 2.33 | 2.64 | 2.68 | 2.48 | 3.10 | 2.96 | 2.71 | 3.12 | 3.14 |



|         |      |      |      |      |      |      |      |      |      |      |      |
|---------|------|------|------|------|------|------|------|------|------|------|------|
| 274.77  | 2.01 | 1.56 | 1.93 | 2.03 | 2.69 | 2.42 | 2.56 | 2.78 | 2.81 | 3.24 | 2.97 |
| 293.42  | 2.78 | 1.67 | 2.74 | 2.99 | 2.90 | 2.08 | 3.17 | 3.20 | 3.33 | 3.42 | 3.18 |
| 313.35  | 2.19 | 1.89 | 1.83 | 2.10 | 3.26 | 2.69 | 2.65 | 3.06 | 3.27 | 3.19 | 3.23 |
| 334.66  | 2.13 | 2.41 | 3.02 | 2.54 | 2.66 | 2.97 | 2.68 | 2.63 | 3.20 | 3.34 | 3.00 |
| 357.43  | 1.34 | 2.24 | 2.14 | 2.54 | 2.52 | 2.48 | 3.16 | 2.72 | 2.76 | 3.11 | 2.84 |
| 381.78  | 2.13 | 1.71 | 2.41 | 2.47 | 2.31 | 2.77 | 2.71 | 2.75 | 2.80 | 3.03 | 2.69 |
| 407.80  | 1.87 | 2.23 | 2.09 | 2.80 | 2.16 | 2.66 | 2.85 | 2.58 | 3.11 | 3.07 | 2.63 |
| 435.62  | 1.92 | 2.67 | 1.59 | 2.55 | 2.68 | 2.08 | 2.90 | 2.73 | 2.74 | 3.12 | 3.32 |
| 465.35  | 1.71 | 1.88 | 2.54 | 2.32 | 2.33 | 3.20 | 2.76 | 2.70 | 3.10 | 2.99 | 3.31 |
| 497.14  | 2.13 | 1.72 | 2.30 | 2.66 | 2.40 | 3.00 | 2.89 | 2.74 | 2.76 | 3.47 | 3.23 |
| 531.11  | 1.95 | 1.59 | 1.46 | 1.87 | 2.12 | 2.41 | 2.58 | 2.77 | 2.92 | 2.81 | 2.89 |
| 567.43  | 1.41 | 1.28 | 2.66 | 2.87 | 2.44 | 2.31 | 3.11 | 2.65 | 2.69 | 2.93 | 2.79 |
| 606.26  | 2.84 | 2.60 | 2.26 | 2.98 | 2.91 | 3.11 | 2.81 | 2.83 | 3.16 | 3.01 | 3.64 |
| 647.76  | 1.93 | 2.69 | 2.44 | 2.73 | 2.80 | 2.94 | 2.87 | 3.19 | 2.93 | 3.44 | 3.01 |
| 692.12  | 2.64 | 2.27 | 2.46 | 2.59 | 2.94 | 2.81 | 3.22 | 3.25 | 3.06 | 3.02 | 3.97 |
| 739.53  | 2.47 | 1.71 | 2.15 | 2.80 | 2.86 | 2.25 | 2.64 | 3.24 | 3.27 | 3.27 | 3.48 |
| 790.22  | 1.83 | 1.36 | 1.74 | 3.13 | 2.56 | 2.10 | 2.48 | 3.13 | 2.99 | 3.08 | 2.92 |
| 844.40  | 1.33 | 1.91 | 2.15 | 2.21 | 2.52 | 2.57 | 2.75 | 2.89 | 2.49 | 3.13 | 2.55 |
| 902.32  | 2.46 | 2.40 | 2.49 | 2.92 | 3.17 | 3.20 | 3.18 | 3.16 | 3.40 | 3.38 | 3.57 |
| 964.23  | 1.92 | 2.38 | 2.15 | 3.09 | 2.65 | 2.59 | 2.84 | 2.36 | 2.71 | 3.11 | 3.72 |
| 1030.41 | 2.32 | 2.31 | 2.53 | 2.70 | 2.64 | 2.96 | 2.82 | 3.13 | 3.28 | 3.57 | 2.83 |
| 1101.15 | 2.43 | 2.55 | 2.89 | 2.46 | 2.71 | 2.76 | 3.33 | 2.99 | 3.37 | 3.43 | 3.26 |
| 1176.77 | 1.53 | 2.25 | 2.49 | 2.60 | 2.65 | 2.87 | 3.45 | 3.35 | 3.07 | 3.48 | 3.57 |
| 1257.60 | 1.94 | 1.77 | 2.44 | 2.65 | 2.37 | 2.53 | 2.83 | 3.12 | 3.12 | 3.67 | 3.74 |
| 1344.00 | 2.64 | 1.75 | 2.02 | 2.85 | 2.70 | 2.80 | 3.21 | 3.12 | 3.54 | 2.62 | 3.65 |
| 1436.36 | 1.87 | 1.69 | 2.23 | 2.50 | 3.04 | 2.56 | 2.87 | 3.23 | 2.82 | 3.20 | 3.14 |
| 1535.09 | 1.69 | 1.73 | 2.44 | 2.87 | 2.60 | 2.48 | 3.13 | 2.94 | 3.05 | 3.59 | 3.44 |
| 1640.63 | 2.35 | 1.76 | 2.12 | 2.80 | 3.01 | 2.67 | 3.03 | 2.75 | 3.28 | 3.24 | 3.25 |
| 1753.44 | 2.07 | 2.09 | 2.21 | 2.52 | 2.48 | 2.53 | 2.78 | 3.20 | 3.17 | 3.33 | 3.10 |
| 1874.02 | 2.35 | 2.44 | 2.80 | 2.39 | 2.41 | 2.97 | 3.25 | 3.10 | 3.12 | 3.39 | 3.15 |
| 2002.92 | 2.36 | 2.33 | 2.64 | 2.36 | 2.71 | 2.67 | 2.79 | 2.82 | 3.34 | 3.34 | 3.00 |
| 2140.71 | 2.17 | 2.38 | 2.21 | 2.80 | 3.03 | 3.23 | 3.17 | 3.17 | 3.20 | 3.03 | 3.53 |
| 2288.00 | 1.93 | 2.17 | 2.46 | 2.61 | 2.65 | 2.82 | 3.21 | 2.96 | 3.02 | 3.25 | 2.97 |
| 2445.44 | 1.92 | 2.25 | 2.36 | 2.31 | 2.82 | 2.93 | 3.07 | 3.19 | 3.09 | 3.26 | 2.93 |
| 2613.73 | 2.52 | 2.59 | 2.62 | 2.73 | 2.69 | 2.51 | 2.65 | 2.78 | 3.40 | 3.69 | 3.67 |
| 2793.63 | 1.68 | 2.59 | 2.12 | 2.60 | 2.55 | 2.92 | 2.90 | 3.41 | 3.61 | 3.39 | 3.39 |
| 2985.93 | 1.57 | 2.27 | 3.49 | 2.60 | 2.85 | 3.09 | 3.09 | 3.44 | 3.53 | 3.79 | 3.39 |
| 3191.49 | 2.18 | 2.20 | 2.58 | 2.98 | 3.09 | 2.93 | 3.31 | 3.82 | 3.11 | 3.90 | 3.47 |
| 3411.21 | 2.59 | 2.05 | 3.32 | 3.13 | 2.90 | 2.91 | 3.54 | 3.38 | 3.45 | 3.92 | 4.12 |
| 3646.09 | 2.74 | 2.42 | 3.00 | 3.52 | 3.63 | 3.73 | 3.53 | 3.64 | 3.63 | 4.10 | 3.76 |
| 3897.16 | 3.30 | 2.29 | 3.61 | 3.62 | 3.66 | 3.29 | 3.87 | 3.31 | 3.69 | 4.19 | 4.14 |

| Wavelength<br>h<br>(nm) | 365.42 | 366.8<br>4 | 368.2<br>7 | 369.6<br>9 | 371.11 | 372.54 | 373.9<br>6 | 375.3<br>9 | 376.8<br>1 | 378.2<br>3 | 379.66 |
|-------------------------|--------|------------|------------|------------|--------|--------|------------|------------|------------|------------|--------|
| Time<br>(ps)            |        |            |            |            |        |        |            |            |            |            |        |
| -2.74                   | 0.34   | -0.09      | 0.21       | -0.05      | 0.00   | 0.14   | 0.01       | -0.35      | 0.01       | -0.13      | 0.10   |
| -2.24                   | 0.34   | 0.18       | 0.13       | 0.19       | 0.02   | 0.06   | 0.11       | 0.30       | 0.17       | 0.28       | 0.31   |
| -1.74                   | -0.26  | 0.13       | 0.12       | -0.14      | -0.03  | -0.03  | 0.03       | 0.16       | 0.20       | -0.09      | -0.20  |
| -1.24                   | -0.20  | 0.02       | -0.22      | -0.03      | -0.05  | -0.03  | 0.02       | 0.17       | -0.16      | -0.04      | 0.14   |
| -0.74                   | 0.11   | -0.07      | -0.16      | 0.01       | -0.01  | -0.01  | 0.17       | 0.28       | -0.09      | 0.10       | 0.00   |

|       |             |            |            |            |             |             |            |            |            |            |             |
|-------|-------------|------------|------------|------------|-------------|-------------|------------|------------|------------|------------|-------------|
| -0.24 | -0.03       | -0.02      | 0.05       | -0.02      | -0.03       | -0.13       | -0.16      | -0.32      | -0.15      | 0.10       | -0.14       |
| -0.14 | -0.15       | 0.07       | 0.02       | 0.13       | 0.16        | 0.19        | -0.02      | -0.29      | 0.14       | -0.24      | 0.14        |
| -0.04 | -0.14       | -0.22      | -0.16      | -0.09      | -0.08       | -0.19       | -0.16      | 0.04       | -0.12      | 0.02       | -0.35       |
| 0.06  | 0.23        | 0.18       | 0.14       | 0.08       | -0.15       | -0.02       | -0.24      | -0.21      | 0.26       | 0.23       | 0.10        |
| 0.16  | 0.34        | -0.05      | 0.37       | -0.01      | 0.59        | 0.18        | -0.04      | 0.02       | 0.52       | 0.25       | 0.30        |
| 0.26  | 0.24        | 0.27       | 0.20       | 0.13       | -0.06       | 0.09        | -0.18      | 0.01       | 0.13       | 0.17       | 0.18        |
| 0.31  | 0.40        | 0.09       | 0.06       | -0.25      | -0.19       | -0.38       | 0.07       | -0.19      | 0.03       | 0.16       | 0.42        |
| 0.36  | -0.06       | -0.11      | -0.12      | -0.04      | -0.08       | -0.13       | -0.44      | -0.11      | -0.09      | 0.13       | 0.00        |
| 0.41  | 0.08        | 0.03       | -0.16      | 0.08       | -0.10       | 0.17        | -0.10      | -0.33      | 0.01       | 0.27       | -0.15       |
| 0.46  | 0.03        | -0.38      | 0.10       | -0.10      | -0.25       | 0.12        | 0.10       | 0.09       | -0.18      | -0.11      | 0.06        |
| 0.51  | -0.15       | 0.19       | 0.13       | 0.21       | -0.02       | -0.36       | -0.43      | -0.46      | 0.04       | 0.11       | 0.24        |
| 0.56  | 0.59        | 0.19       | -0.07      | 0.02       | 0.16        | -0.08       | -0.20      | 0.20       | -0.07      | -0.11      | -0.16       |
| 0.61  | 0.39        | 0.07       | 0.16       | -0.18      | 0.15        | 0.41        | -0.23      | 0.31       | 0.20       | 0.04       | -0.03       |
| 0.66  | -57.84      | -30.66     | -13.86     | -7.39      | -3.50       | -0.10       | 0.95       | -0.03      | -0.04      | 0.18       | 0.05        |
| 0.71  | 196.98      | 125.9<br>0 | 47.58      | -25.01     | -77.37      | -96.62      | -83.03     | -50.45     | -20.23     | -5.06      | -0.60       |
| 0.76  | 300.96      | 353.6<br>6 | 384.5<br>0 | 380.9<br>4 | 336.74      | 263.48      | 174.5<br>7 | 83.67      | 2.56       | -59.16     | -95.60      |
| 0.81  | -<br>116.88 | -54.10     | 42.60      | 157.2<br>9 | 265.25      | 344.22      | 387.8<br>1 | 400.0<br>9 | 390.8<br>2 | 358.7<br>5 | 303.83      |
| 0.86  | 6.16        | -8.81      | -44.45     | -87.84     | -<br>114.90 | -<br>110.37 | -72.38     | -3.75      | 85.08      | 183.4<br>4 | 274.30      |
| 0.91  | 8.87        | 9.92       | 11.23      | 15.69      | 13.75       | 8.08        | 12.21      | 15.78      | -10.58     | -63.24     | -<br>111.52 |
| 0.96  | 9.85        | 10.46      | 10.79      | 9.83       | 9.01        | 9.09        | 9.96       | 10.50      | 11.76      | 14.64      | 15.22       |
| 1.01  | 10.28       | 9.56       | 10.29      | 10.90      | 10.82       | 10.66       | 11.76      | 12.49      | 12.91      | 12.36      | 11.73       |
| 1.06  | 9.17        | 9.23       | 9.36       | 9.11       | 9.95        | 10.92       | 11.04      | 10.18      | 10.81      | 11.36      | 11.51       |
| 1.11  | 7.64        | 7.82       | 9.15       | 9.54       | 9.28        | 9.30        | 9.40       | 9.70       | 9.80       | 10.45      | 10.33       |
| 1.16  | 7.78        | 8.33       | 8.47       | 9.20       | 8.78        | 8.30        | 8.51       | 9.52       | 10.10      | 9.99       | 9.66        |
| 1.21  | 8.54        | 8.83       | 8.67       | 8.49       | 9.02        | 9.56        | 9.22       | 8.69       | 9.29       | 10.26      | 10.35       |
| 1.26  | 7.63        | 7.33       | 8.19       | 8.00       | 8.14        | 8.12        | 8.61       | 9.32       | 9.51       | 9.75       | 9.53        |
| 1.31  | 7.34        | 7.19       | 7.81       | 8.33       | 8.53        | 8.64        | 8.20       | 8.55       | 8.89       | 8.88       | 8.78        |
| 1.36  | 7.00        | 7.53       | 7.48       | 7.40       | 7.63        | 7.90        | 7.94       | 7.64       | 7.89       | 8.76       | 8.74        |
| 1.41  | 7.03        | 6.69       | 7.60       | 7.67       | 7.83        | 7.61        | 7.81       | 7.96       | 8.38       | 8.17       | 8.14        |
| 1.46  | 6.98        | 6.92       | 6.98       | 7.06       | 7.60        | 7.83        | 7.42       | 7.43       | 7.91       | 8.35       | 8.36        |
| 1.51  | 6.70        | 6.81       | 7.37       | 7.64       | 7.53        | 7.51        | 8.12       | 8.10       | 7.79       | 8.03       | 8.16        |
| 1.56  | 6.93        | 7.11       | 7.37       | 7.86       | 7.78        | 7.44        | 7.87       | 7.86       | 8.17       | 8.24       | 7.88        |
| 1.61  | 6.90        | 7.04       | 6.44       | 6.96       | 7.07        | 7.08        | 7.58       | 7.42       | 7.94       | 8.25       | 8.06        |
| 1.66  | 6.52        | 6.61       | 7.07       | 7.51       | 7.23        | 7.63        | 7.96       | 7.53       | 7.61       | 8.03       | 8.39        |
| 1.71  | 6.60        | 6.57       | 6.78       | 7.26       | 7.32        | 7.31        | 7.30       | 7.58       | 7.92       | 8.09       | 7.94        |
| 1.76  | 7.15        | 6.83       | 7.26       | 7.24       | 7.30        | 7.77        | 8.06       | 7.74       | 7.85       | 8.33       | 8.85        |
| 1.81  | 5.98        | 5.86       | 6.35       | 6.47       | 6.57        | 6.73        | 7.00       | 6.72       | 7.15       | 7.20       | 7.08        |
| 1.86  | 7.04        | 6.24       | 6.30       | 6.78       | 6.98        | 6.85        | 6.88       | 7.10       | 7.40       | 7.64       | 7.45        |
| 1.91  | 5.89        | 6.32       | 6.55       | 6.56       | 6.08        | 6.48        | 6.76       | 7.15       | 6.98       | 7.25       | 7.37        |
| 1.96  | 6.47        | 6.39       | 6.84       | 6.94       | 7.16        | 7.22        | 6.84       | 6.96       | 7.55       | 7.64       | 7.33        |
| 2.01  | 6.40        | 6.48       | 6.26       | 6.69       | 7.23        | 7.27        | 6.93       | 7.26       | 7.41       | 8.00       | 7.74        |
| 2.06  | 6.18        | 6.34       | 7.12       | 6.88       | 7.13        | 6.93        | 7.13       | 7.29       | 6.89       | 7.65       | 7.54        |
| 2.11  | 6.43        | 5.77       | 6.20       | 6.88       | 6.62        | 6.15        | 6.75       | 6.93       | 7.17       | 7.13       | 7.33        |
| 2.16  | 6.47        | 6.26       | 6.36       | 6.47       | 6.56        | 6.75        | 6.82       | 6.80       | 6.83       | 7.27       | 7.56        |
| 2.21  | 6.56        | 6.03       | 6.90       | 6.89       | 6.70        | 6.93        | 6.90       | 7.22       | 7.47       | 7.35       | 7.62        |
| 2.26  | 6.77        | 6.64       | 7.20       | 7.08       | 7.22        | 7.15        | 6.97       | 7.22       | 7.56       | 7.89       | 7.90        |
| 2.31  | 5.83        | 5.78       | 6.29       | 6.15       | 6.18        | 6.21        | 6.77       | 6.54       | 6.88       | 7.13       | 7.48        |
| 2.36  | 5.47        | 5.33       | 6.07       | 6.43       | 5.79        | 6.51        | 6.33       | 6.07       | 6.40       | 7.09       | 6.92        |
| 2.41  | 5.86        | 6.16       | 6.20       | 6.24       | 6.45        | 6.35        | 6.44       | 6.37       | 7.00       | 7.20       | 7.42        |

|      |      |      |      |      |      |      |      |      |      |      |      |
|------|------|------|------|------|------|------|------|------|------|------|------|
| 2.46 | 5.61 | 5.89 | 6.17 | 6.14 | 6.56 | 6.63 | 6.45 | 6.68 | 6.93 | 7.22 | 7.25 |
| 2.51 | 6.29 | 6.40 | 6.42 | 6.80 | 6.87 | 6.95 | 6.97 | 6.98 | 7.38 | 7.90 | 7.26 |
| 2.56 | 6.23 | 5.86 | 5.96 | 6.46 | 6.49 | 6.64 | 7.00 | 6.62 | 7.09 | 7.56 | 7.63 |
| 2.61 | 5.62 | 5.43 | 5.97 | 6.35 | 6.23 | 6.34 | 6.56 | 6.24 | 6.42 | 6.64 | 6.79 |
| 2.66 | 6.06 | 5.57 | 6.03 | 6.10 | 6.52 | 6.39 | 6.76 | 6.53 | 6.52 | 7.06 | 7.02 |
| 2.71 | 5.68 | 6.26 | 6.30 | 6.40 | 6.76 | 6.61 | 6.63 | 6.39 | 7.01 | 7.15 | 7.06 |
| 2.76 | 5.84 | 5.87 | 5.97 | 6.48 | 6.62 | 6.76 | 6.79 | 6.62 | 7.00 | 7.25 | 7.11 |
| 2.81 | 6.04 | 5.75 | 5.87 | 6.25 | 6.30 | 6.27 | 6.17 | 6.15 | 6.49 | 6.63 | 6.83 |
| 2.86 | 5.70 | 5.34 | 5.50 | 5.83 | 6.11 | 5.94 | 5.97 | 6.22 | 6.50 | 6.51 | 6.61 |
| 2.91 | 5.71 | 5.44 | 6.17 | 6.15 | 6.19 | 6.07 | 6.45 | 6.75 | 6.65 | 6.91 | 6.52 |
| 2.96 | 6.15 | 5.75 | 6.55 | 6.21 | 6.44 | 6.67 | 6.55 | 6.74 | 7.23 | 7.35 | 7.23 |
| 3.01 | 6.02 | 5.71 | 5.84 | 5.82 | 6.34 | 6.48 | 6.43 | 6.60 | 6.71 | 7.12 | 6.98 |
| 3.06 | 5.88 | 5.86 | 6.05 | 5.95 | 6.30 | 6.61 | 5.99 | 6.39 | 6.61 | 7.06 | 6.76 |
| 3.11 | 5.63 | 5.43 | 6.30 | 6.25 | 6.27 | 6.23 | 6.19 | 6.46 | 6.76 | 6.94 | 6.92 |
| 3.16 | 5.83 | 5.87 | 5.77 | 6.05 | 6.22 | 5.94 | 6.00 | 6.18 | 6.21 | 6.59 | 6.52 |
| 3.21 | 6.12 | 5.89 | 6.28 | 5.86 | 6.28 | 6.88 | 6.65 | 6.32 | 6.88 | 6.83 | 7.08 |
| 3.26 | 5.47 | 5.65 | 6.09 | 5.73 | 6.22 | 6.24 | 6.12 | 6.21 | 6.56 | 6.91 | 6.72 |
| 3.31 | 6.17 | 5.92 | 5.72 | 6.41 | 6.19 | 6.40 | 6.43 | 6.35 | 6.77 | 6.93 | 6.92 |
| 3.36 | 5.60 | 5.83 | 6.00 | 6.21 | 6.52 | 6.71 | 6.31 | 6.46 | 6.95 | 7.17 | 6.75 |
| 3.41 | 5.40 | 5.88 | 6.22 | 6.06 | 6.29 | 6.16 | 6.27 | 6.41 | 6.35 | 6.84 | 6.79 |
| 3.46 | 5.90 | 5.56 | 6.17 | 6.27 | 6.53 | 6.27 | 6.47 | 6.43 | 6.84 | 6.90 | 6.96 |
| 3.51 | 5.58 | 5.73 | 5.80 | 6.29 | 5.82 | 6.66 | 6.43 | 6.31 | 6.25 | 6.76 | 7.16 |
| 3.56 | 5.50 | 5.51 | 5.84 | 5.83 | 5.97 | 6.07 | 5.98 | 5.94 | 6.52 | 6.63 | 6.78 |
| 3.61 | 5.21 | 5.17 | 5.62 | 5.49 | 5.87 | 6.06 | 5.79 | 6.02 | 6.53 | 6.68 | 6.80 |
| 3.66 | 5.60 | 6.01 | 5.79 | 6.26 | 6.01 | 6.26 | 5.88 | 6.32 | 6.71 | 7.19 | 6.80 |
| 3.71 | 5.95 | 5.84 | 6.35 | 6.58 | 6.28 | 6.25 | 6.62 | 6.55 | 6.99 | 6.82 | 7.17 |
| 3.76 | 6.52 | 6.27 | 6.11 | 6.85 | 6.67 | 6.52 | 6.52 | 6.81 | 6.79 | 6.85 | 7.22 |
| 3.81 | 5.38 | 5.32 | 5.88 | 6.01 | 6.05 | 5.73 | 6.21 | 6.32 | 6.14 | 6.66 | 6.83 |
| 3.86 | 5.20 | 4.82 | 5.68 | 5.74 | 5.53 | 5.86 | 5.94 | 5.80 | 6.18 | 6.51 | 6.23 |
| 3.91 | 5.53 | 5.67 | 5.97 | 6.10 | 6.30 | 6.30 | 6.54 | 6.44 | 6.78 | 7.17 | 6.73 |
| 3.96 | 5.71 | 5.68 | 6.48 | 6.16 | 6.26 | 6.28 | 6.98 | 6.35 | 6.56 | 6.83 | 6.91 |
| 4.01 | 5.91 | 5.66 | 5.59 | 6.06 | 6.39 | 6.57 | 6.57 | 6.51 | 7.08 | 6.50 | 6.94 |
| 4.06 | 5.63 | 5.42 | 6.14 | 5.97 | 5.96 | 6.41 | 6.32 | 6.52 | 6.50 | 6.60 | 6.71 |
| 4.11 | 5.54 | 5.01 | 5.88 | 6.23 | 5.94 | 5.76 | 6.21 | 6.14 | 6.27 | 6.51 | 6.66 |
| 4.16 | 5.48 | 5.37 | 5.88 | 5.80 | 6.08 | 6.11 | 6.52 | 6.46 | 6.84 | 6.76 | 6.79 |
| 4.21 | 5.99 | 6.03 | 6.33 | 6.60 | 6.55 | 6.44 | 6.77 | 6.55 | 6.64 | 7.42 | 7.16 |
| 4.26 | 5.90 | 5.88 | 5.90 | 6.64 | 6.17 | 6.65 | 6.50 | 6.58 | 7.03 | 7.06 | 6.98 |
| 4.31 | 5.28 | 5.69 | 5.77 | 5.93 | 5.75 | 5.56 | 5.90 | 6.01 | 6.01 | 6.70 | 6.58 |
| 4.36 | 5.27 | 5.14 | 5.59 | 5.41 | 5.63 | 5.95 | 5.80 | 5.91 | 5.82 | 6.23 | 6.36 |
| 4.41 | 5.70 | 5.22 | 5.61 | 5.49 | 5.84 | 6.07 | 6.30 | 6.02 | 6.31 | 6.44 | 6.37 |
| 4.46 | 5.91 | 6.06 | 6.20 | 6.26 | 6.18 | 6.46 | 6.50 | 6.80 | 6.63 | 6.84 | 7.02 |
| 4.51 | 6.02 | 5.80 | 5.81 | 5.98 | 6.44 | 6.48 | 6.25 | 6.21 | 6.64 | 6.65 | 6.79 |
| 4.56 | 5.57 | 5.59 | 5.43 | 5.66 | 6.13 | 6.20 | 6.41 | 6.15 | 6.11 | 6.54 | 6.77 |
| 4.61 | 5.60 | 5.65 | 5.69 | 5.99 | 5.53 | 6.06 | 6.26 | 6.09 | 6.40 | 6.79 | 6.49 |
| 4.66 | 4.99 | 5.16 | 6.06 | 5.71 | 5.81 | 5.81 | 5.77 | 5.93 | 6.49 | 6.64 | 6.35 |
| 4.71 | 6.24 | 6.07 | 6.22 | 6.68 | 6.61 | 6.69 | 6.80 | 6.54 | 6.78 | 7.21 | 7.18 |
| 4.76 | 5.81 | 5.64 | 5.76 | 6.03 | 6.13 | 6.21 | 6.63 | 6.46 | 6.46 | 7.08 | 7.35 |
| 4.81 | 5.29 | 5.17 | 5.54 | 5.77 | 5.80 | 6.16 | 6.13 | 6.39 | 6.51 | 6.48 | 6.55 |
| 4.86 | 5.16 | 5.64 | 5.26 | 5.60 | 5.94 | 5.99 | 5.84 | 6.22 | 6.37 | 6.55 | 6.53 |
| 4.91 | 5.38 | 5.56 | 5.50 | 5.91 | 6.02 | 5.80 | 6.24 | 6.04 | 6.27 | 6.96 | 6.72 |

|       |      |      |      |      |      |      |      |      |      |      |      |
|-------|------|------|------|------|------|------|------|------|------|------|------|
| 4.96  | 5.58 | 5.35 | 5.92 | 5.63 | 6.18 | 6.07 | 5.90 | 6.69 | 6.99 | 7.11 | 6.66 |
| 5.01  | 5.88 | 5.89 | 5.92 | 6.14 | 5.90 | 6.25 | 6.40 | 6.22 | 6.77 | 6.92 | 6.88 |
| 5.06  | 5.44 | 5.21 | 5.66 | 5.75 | 5.93 | 5.77 | 6.05 | 6.25 | 6.16 | 6.54 | 6.43 |
| 5.11  | 4.94 | 4.98 | 5.62 | 5.66 | 5.87 | 5.74 | 5.56 | 5.60 | 5.76 | 6.34 | 6.24 |
| 5.16  | 5.38 | 4.90 | 5.48 | 5.50 | 5.61 | 5.63 | 5.89 | 5.74 | 6.28 | 6.45 | 6.41 |
| 5.21  | 5.20 | 5.35 | 5.18 | 5.71 | 5.62 | 5.68 | 5.52 | 6.02 | 6.23 | 6.21 | 6.21 |
| 5.26  | 5.49 | 5.78 | 6.15 | 6.03 | 6.01 | 6.33 | 6.33 | 6.37 | 6.57 | 6.83 | 6.90 |
| 5.31  | 5.41 | 5.48 | 5.57 | 5.87 | 6.11 | 6.08 | 6.54 | 6.28 | 6.41 | 6.72 | 6.76 |
| 5.38  | 5.26 | 5.36 | 5.60 | 5.31 | 5.44 | 5.76 | 5.82 | 5.68 | 6.14 | 6.35 | 6.30 |
| 5.45  | 5.55 | 5.69 | 5.99 | 6.06 | 5.90 | 5.88 | 6.01 | 6.16 | 6.14 | 6.64 | 6.61 |
| 5.53  | 5.38 | 5.20 | 5.52 | 5.47 | 5.64 | 6.00 | 6.09 | 6.27 | 6.34 | 6.33 | 6.64 |
| 5.61  | 5.72 | 5.51 | 5.66 | 6.04 | 5.79 | 6.05 | 6.20 | 6.19 | 6.52 | 6.93 | 6.86 |
| 5.70  | 5.34 | 5.21 | 5.46 | 5.74 | 5.72 | 5.74 | 6.02 | 5.79 | 5.98 | 6.27 | 6.03 |
| 5.80  | 5.35 | 5.42 | 5.36 | 5.87 | 5.82 | 5.74 | 5.98 | 5.85 | 5.81 | 6.43 | 6.38 |
| 5.90  | 4.94 | 5.11 | 5.18 | 5.47 | 5.63 | 5.46 | 5.62 | 5.35 | 5.71 | 6.10 | 6.32 |
| 6.01  | 5.65 | 5.67 | 6.02 | 5.99 | 5.98 | 6.17 | 5.99 | 6.20 | 6.34 | 6.76 | 6.80 |
| 6.13  | 5.08 | 5.17 | 5.28 | 5.62 | 5.58 | 5.89 | 5.92 | 5.78 | 6.05 | 6.59 | 6.82 |
| 6.25  | 5.21 | 4.98 | 5.21 | 5.28 | 5.35 | 5.51 | 5.78 | 5.32 | 6.06 | 5.92 | 5.95 |
| 6.39  | 4.75 | 4.83 | 5.10 | 5.37 | 5.32 | 5.35 | 5.27 | 5.36 | 5.89 | 6.21 | 6.07 |
| 6.53  | 4.77 | 5.01 | 4.97 | 4.88 | 5.40 | 5.61 | 5.50 | 5.43 | 5.80 | 6.14 | 6.05 |
| 6.69  | 5.00 | 5.40 | 5.55 | 5.64 | 6.01 | 6.02 | 6.09 | 6.12 | 6.40 | 6.58 | 6.84 |
| 6.85  | 4.99 | 5.00 | 5.00 | 5.20 | 5.52 | 5.54 | 5.75 | 5.40 | 5.80 | 6.32 | 6.01 |
| 7.03  | 4.67 | 4.59 | 5.17 | 5.15 | 5.24 | 5.71 | 5.82 | 5.16 | 5.69 | 5.89 | 5.79 |
| 7.21  | 4.65 | 4.65 | 4.81 | 4.76 | 5.13 | 5.20 | 5.12 | 5.31 | 5.41 | 5.92 | 5.78 |
| 7.41  | 4.79 | 4.82 | 5.41 | 5.33 | 5.77 | 5.77 | 5.55 | 5.99 | 6.13 | 6.42 | 6.20 |
| 7.63  | 5.17 | 5.03 | 5.25 | 5.89 | 5.69 | 5.49 | 5.71 | 5.89 | 6.43 | 6.57 | 6.43 |
| 7.86  | 4.82 | 5.08 | 5.08 | 5.72 | 5.56 | 5.71 | 5.24 | 5.59 | 5.85 | 6.28 | 6.33 |
| 8.10  | 5.29 | 4.65 | 5.15 | 5.26 | 5.47 | 5.31 | 5.60 | 5.49 | 5.59 | 5.52 | 5.75 |
| 8.36  | 4.90 | 4.20 | 4.92 | 4.76 | 5.06 | 5.12 | 5.15 | 5.15 | 5.08 | 5.43 | 5.35 |
| 8.64  | 4.88 | 4.69 | 5.31 | 5.43 | 5.35 | 5.45 | 5.44 | 5.60 | 6.15 | 6.05 | 6.01 |
| 8.94  | 4.61 | 5.54 | 5.59 | 5.52 | 5.68 | 5.77 | 5.97 | 5.94 | 6.39 | 6.48 | 6.15 |
| 9.26  | 5.24 | 5.16 | 5.64 | 5.49 | 5.52 | 5.54 | 5.96 | 5.63 | 5.94 | 6.32 | 6.54 |
| 9.60  | 5.32 | 4.55 | 4.90 | 4.93 | 5.31 | 5.38 | 5.38 | 5.26 | 5.26 | 6.00 | 5.77 |
| 9.97  | 4.35 | 4.25 | 4.55 | 4.63 | 4.81 | 5.08 | 4.85 | 5.16 | 5.51 | 5.54 | 5.72 |
| 10.36 | 5.06 | 4.87 | 5.12 | 5.07 | 5.15 | 5.29 | 5.44 | 5.64 | 6.04 | 6.12 | 6.11 |
| 10.77 | 4.61 | 4.66 | 4.76 | 5.03 | 5.14 | 5.55 | 5.25 | 5.46 | 5.77 | 5.92 | 5.92 |
| 11.22 | 4.34 | 4.61 | 4.88 | 4.68 | 4.80 | 5.26 | 5.17 | 5.24 | 5.36 | 5.64 | 5.79 |
| 11.70 | 4.74 | 4.45 | 4.81 | 4.66 | 5.36 | 5.37 | 5.46 | 5.29 | 5.77 | 6.04 | 6.11 |
| 12.21 | 4.24 | 4.29 | 4.19 | 4.84 | 4.98 | 4.74 | 4.94 | 4.94 | 4.97 | 5.19 | 5.46 |
| 12.75 | 4.50 | 4.25 | 4.79 | 4.45 | 4.80 | 4.96 | 5.16 | 5.06 | 5.34 | 5.47 | 5.77 |
| 13.33 | 4.03 | 4.73 | 4.85 | 4.84 | 5.25 | 5.27 | 5.38 | 5.24 | 5.53 | 5.96 | 5.87 |
| 13.95 | 4.26 | 4.68 | 4.63 | 5.28 | 5.20 | 5.03 | 5.19 | 5.53 | 5.91 | 5.76 | 5.88 |
| 14.62 | 3.95 | 4.09 | 4.44 | 4.67 | 4.95 | 4.72 | 4.52 | 5.15 | 5.15 | 5.44 | 5.62 |
| 15.33 | 4.02 | 3.86 | 4.12 | 4.27 | 4.56 | 4.47 | 4.59 | 4.61 | 4.72 | 5.13 | 5.25 |
| 16.09 | 4.36 | 4.06 | 4.31 | 4.49 | 4.64 | 4.71 | 4.80 | 5.07 | 5.29 | 5.34 | 5.45 |
| 16.90 | 4.36 | 4.12 | 4.85 | 4.73 | 4.80 | 4.89 | 5.04 | 5.18 | 5.48 | 5.81 | 5.87 |
| 17.77 | 3.96 | 4.59 | 4.68 | 4.54 | 4.81 | 5.20 | 4.87 | 5.12 | 5.57 | 5.63 | 5.34 |
| 18.70 | 4.20 | 4.15 | 4.26 | 4.63 | 4.66 | 4.73 | 4.83 | 4.83 | 5.08 | 5.44 | 5.36 |
| 19.69 | 3.52 | 3.76 | 3.69 | 4.23 | 4.36 | 4.41 | 4.57 | 4.55 | 4.93 | 5.01 | 5.45 |
| 20.75 | 3.85 | 3.74 | 4.37 | 4.25 | 4.17 | 4.57 | 4.59 | 4.80 | 4.61 | 5.18 | 5.28 |

|        |      |      |      |      |      |      |      |      |      |      |      |
|--------|------|------|------|------|------|------|------|------|------|------|------|
| 21.89  | 3.87 | 3.76 | 4.56 | 4.46 | 4.76 | 5.04 | 4.99 | 5.07 | 5.16 | 5.68 | 5.56 |
| 23.10  | 4.39 | 4.70 | 4.51 | 4.78 | 4.92 | 5.01 | 5.01 | 5.55 | 5.55 | 5.87 | 6.04 |
| 24.39  | 4.26 | 3.71 | 4.47 | 4.15 | 4.36 | 4.80 | 4.89 | 4.91 | 5.03 | 5.36 | 5.44 |
| 25.78  | 3.86 | 4.23 | 3.92 | 4.35 | 4.52 | 4.59 | 4.45 | 5.01 | 4.81 | 5.26 | 5.08 |
| 27.26  | 3.52 | 3.90 | 4.60 | 4.08 | 4.46 | 4.61 | 4.79 | 5.06 | 5.07 | 5.19 | 5.45 |
| 28.84  | 3.61 | 3.95 | 4.12 | 4.41 | 4.58 | 4.66 | 4.44 | 5.11 | 5.07 | 5.12 | 5.42 |
| 30.53  | 3.89 | 3.81 | 4.40 | 4.13 | 4.79 | 4.72 | 4.83 | 4.80 | 5.01 | 5.43 | 5.43 |
| 32.34  | 3.68 | 3.20 | 3.76 | 4.05 | 4.06 | 4.30 | 4.66 | 4.42 | 4.73 | 5.24 | 5.07 |
| 34.27  | 3.98 | 3.63 | 4.34 | 3.81 | 4.26 | 4.77 | 4.63 | 4.37 | 5.21 | 5.35 | 5.38 |
| 36.34  | 3.78 | 4.10 | 4.45 | 4.32 | 4.38 | 4.41 | 4.54 | 4.65 | 4.83 | 5.33 | 5.19 |
| 38.55  | 3.84 | 3.97 | 3.93 | 4.09 | 4.26 | 4.60 | 4.52 | 4.79 | 4.72 | 5.49 | 5.23 |
| 40.91  | 3.74 | 3.89 | 4.49 | 4.21 | 4.62 | 4.44 | 4.82 | 4.73 | 4.92 | 5.40 | 5.27 |
| 43.43  | 3.43 | 3.62 | 3.77 | 3.87 | 4.33 | 4.16 | 4.16 | 4.40 | 4.36 | 5.14 | 4.97 |
| 46.13  | 3.80 | 4.15 | 4.17 | 4.09 | 5.16 | 4.60 | 4.70 | 4.70 | 5.23 | 5.16 | 5.38 |
| 49.01  | 4.17 | 3.89 | 3.62 | 4.23 | 4.75 | 4.71 | 4.66 | 4.44 | 4.90 | 5.26 | 5.37 |
| 52.09  | 3.67 | 3.55 | 4.08 | 4.32 | 4.19 | 4.46 | 4.41 | 4.41 | 4.81 | 4.90 | 5.34 |
| 55.39  | 3.53 | 3.78 | 3.82 | 4.28 | 4.48 | 4.03 | 4.55 | 4.65 | 4.94 | 5.18 | 5.02 |
| 58.91  | 3.45 | 3.63 | 4.00 | 4.18 | 4.28 | 4.50 | 4.28 | 4.45 | 4.84 | 4.73 | 4.72 |
| 62.68  | 3.71 | 3.52 | 3.85 | 4.23 | 4.01 | 4.41 | 4.04 | 4.41 | 4.95 | 5.01 | 4.91 |
| 66.70  | 4.03 | 3.70 | 4.39 | 4.08 | 4.19 | 4.35 | 4.31 | 4.40 | 4.74 | 5.46 | 4.94 |
| 71.00  | 3.60 | 3.46 | 4.18 | 3.89 | 4.62 | 4.59 | 4.47 | 4.89 | 4.98 | 4.84 | 5.02 |
| 75.60  | 3.94 | 3.37 | 3.72 | 4.10 | 4.22 | 4.28 | 4.35 | 4.24 | 4.71 | 5.01 | 4.69 |
| 80.51  | 3.61 | 3.88 | 3.90 | 4.09 | 4.45 | 4.36 | 4.33 | 4.49 | 4.91 | 5.33 | 5.32 |
| 85.77  | 3.82 | 3.32 | 4.07 | 4.01 | 4.13 | 4.42 | 4.28 | 4.56 | 4.41 | 4.63 | 4.68 |
| 91.38  | 3.71 | 3.72 | 4.18 | 4.27 | 3.83 | 4.28 | 4.43 | 4.51 | 4.97 | 4.99 | 5.08 |
| 97.39  | 3.68 | 3.95 | 3.76 | 4.07 | 4.20 | 4.15 | 4.26 | 4.46 | 4.89 | 5.04 | 4.58 |
| 103.80 | 3.79 | 4.27 | 4.11 | 4.35 | 4.69 | 4.69 | 4.78 | 4.56 | 5.08 | 4.95 | 5.38 |
| 110.66 | 4.02 | 3.90 | 4.22 | 4.13 | 4.47 | 4.34 | 4.46 | 4.48 | 4.96 | 4.98 | 5.21 |
| 117.99 | 3.49 | 3.43 | 3.71 | 3.99 | 4.18 | 4.11 | 4.09 | 4.19 | 4.54 | 5.15 | 4.85 |
| 125.83 | 3.73 | 3.93 | 4.32 | 3.99 | 4.22 | 4.51 | 4.47 | 4.34 | 4.51 | 4.82 | 4.82 |
| 134.21 | 3.69 | 3.98 | 3.86 | 3.88 | 4.46 | 4.40 | 4.45 | 4.73 | 4.72 | 4.95 | 4.80 |
| 143.17 | 4.04 | 3.99 | 3.97 | 4.49 | 4.23 | 4.17 | 4.28 | 4.74 | 4.93 | 5.20 | 5.33 |
| 152.74 | 3.93 | 3.46 | 3.66 | 4.13 | 4.30 | 4.40 | 4.39 | 4.52 | 4.64 | 5.09 | 4.69 |
| 162.97 | 3.78 | 3.43 | 3.97 | 3.91 | 4.29 | 4.15 | 3.93 | 4.49 | 4.65 | 4.51 | 5.02 |
| 173.91 | 3.16 | 3.20 | 4.03 | 4.17 | 4.09 | 4.14 | 4.27 | 4.17 | 4.47 | 4.64 | 4.86 |
| 185.60 | 3.22 | 3.76 | 3.96 | 3.54 | 4.12 | 4.57 | 4.39 | 4.28 | 4.72 | 4.75 | 4.76 |
| 198.10 | 3.87 | 3.48 | 3.90 | 4.09 | 4.26 | 4.45 | 4.23 | 4.25 | 4.38 | 4.63 | 4.72 |
| 211.46 | 3.76 | 4.16 | 4.03 | 4.19 | 4.17 | 4.39 | 4.77 | 4.62 | 5.33 | 5.25 | 5.02 |
| 225.75 | 3.36 | 3.45 | 3.57 | 3.62 | 4.10 | 4.05 | 4.15 | 4.00 | 4.23 | 4.54 | 4.48 |
| 241.01 | 3.37 | 3.57 | 3.88 | 4.20 | 4.46 | 4.24 | 4.28 | 4.46 | 4.34 | 4.80 | 5.12 |
| 257.33 | 3.44 | 3.40 | 4.00 | 3.95 | 4.08 | 4.45 | 4.11 | 4.31 | 4.57 | 4.96 | 4.49 |
| 274.77 | 3.28 | 3.37 | 3.64 | 4.28 | 3.97 | 4.23 | 4.04 | 4.07 | 4.37 | 4.68 | 4.77 |
| 293.42 | 3.54 | 3.76 | 4.14 | 4.31 | 4.34 | 4.41 | 4.54 | 4.40 | 4.80 | 4.72 | 4.78 |
| 313.35 | 3.42 | 3.51 | 3.57 | 3.83 | 3.90 | 4.02 | 4.71 | 4.73 | 4.53 | 4.73 | 4.65 |
| 334.66 | 3.67 | 3.83 | 4.01 | 4.34 | 4.33 | 4.29 | 4.54 | 4.37 | 4.67 | 4.97 | 4.97 |
| 357.43 | 3.56 | 3.67 | 3.90 | 4.08 | 3.97 | 4.22 | 4.05 | 4.17 | 4.41 | 4.43 | 4.52 |
| 381.78 | 3.70 | 3.37 | 3.54 | 3.82 | 3.64 | 3.93 | 4.10 | 4.27 | 4.59 | 4.70 | 4.72 |
| 407.80 | 3.34 | 3.65 | 3.69 | 3.60 | 4.18 | 4.06 | 4.10 | 3.97 | 4.63 | 4.58 | 4.57 |
| 435.62 | 3.64 | 3.80 | 4.00 | 4.10 | 4.18 | 4.25 | 4.35 | 4.63 | 4.49 | 4.93 | 4.78 |
| 465.35 | 3.42 | 3.81 | 3.65 | 3.90 | 4.19 | 4.30 | 4.05 | 4.46 | 4.51 | 4.46 | 4.60 |

|         |      |      |      |      |      |      |      |      |      |      |      |
|---------|------|------|------|------|------|------|------|------|------|------|------|
| 497.14  | 3.86 | 3.47 | 4.10 | 3.83 | 4.37 | 4.37 | 4.26 | 4.47 | 4.37 | 5.14 | 4.52 |
| 531.11  | 3.38 | 3.53 | 3.74 | 3.51 | 3.89 | 3.84 | 4.24 | 3.63 | 4.47 | 4.73 | 4.44 |
| 567.43  | 3.69 | 3.71 | 3.92 | 3.91 | 4.25 | 4.27 | 4.04 | 4.55 | 4.45 | 4.58 | 4.47 |
| 606.26  | 3.60 | 3.72 | 4.11 | 3.91 | 4.01 | 4.45 | 4.22 | 4.42 | 4.40 | 4.71 | 4.57 |
| 647.76  | 4.11 | 3.84 | 4.00 | 4.40 | 4.25 | 4.57 | 4.27 | 4.55 | 4.56 | 4.87 | 4.75 |
| 692.12  | 3.69 | 3.74 | 3.91 | 3.99 | 4.23 | 4.25 | 4.05 | 4.41 | 4.59 | 4.85 | 4.19 |
| 739.53  | 3.92 | 3.52 | 4.15 | 4.33 | 4.20 | 4.33 | 4.25 | 4.17 | 4.85 | 4.84 | 4.87 |
| 790.22  | 3.56 | 3.41 | 3.76 | 4.23 | 3.78 | 3.79 | 4.05 | 4.00 | 4.31 | 4.08 | 4.18 |
| 844.40  | 3.19 | 3.10 | 3.56 | 3.65 | 3.75 | 3.98 | 3.93 | 4.43 | 4.41 | 4.54 | 4.52 |
| 902.32  | 4.12 | 3.88 | 4.05 | 4.07 | 4.51 | 4.33 | 4.45 | 4.40 | 4.41 | 5.09 | 5.05 |
| 964.23  | 3.74 | 3.47 | 3.80 | 3.74 | 3.85 | 4.12 | 4.18 | 4.31 | 4.14 | 4.55 | 4.71 |
| 1030.41 | 3.71 | 4.08 | 3.85 | 3.95 | 4.42 | 4.37 | 4.49 | 4.43 | 4.44 | 4.84 | 4.51 |
| 1101.15 | 3.74 | 3.57 | 4.14 | 4.16 | 4.10 | 4.25 | 4.05 | 4.16 | 4.65 | 4.59 | 4.43 |
| 1176.77 | 3.75 | 3.76 | 3.89 | 4.00 | 4.36 | 4.31 | 4.41 | 4.50 | 4.55 | 4.86 | 4.74 |
| 1257.60 | 3.59 | 3.43 | 4.20 | 3.94 | 4.31 | 4.26 | 4.21 | 4.66 | 4.87 | 4.86 | 4.48 |
| 1344.00 | 4.14 | 3.62 | 4.15 | 4.19 | 4.18 | 4.66 | 4.48 | 4.51 | 4.71 | 4.88 | 5.07 |
| 1436.36 | 3.34 | 3.67 | 3.69 | 3.91 | 4.01 | 4.21 | 4.28 | 3.80 | 4.64 | 4.68 | 4.38 |
| 1535.09 | 4.18 | 3.97 | 3.93 | 4.08 | 4.31 | 4.23 | 4.52 | 4.16 | 4.59 | 4.78 | 4.45 |
| 1640.63 | 3.82 | 3.43 | 3.73 | 4.44 | 4.13 | 4.05 | 4.35 | 4.34 | 4.67 | 4.59 | 4.54 |
| 1753.44 | 3.84 | 3.60 | 3.99 | 4.15 | 4.35 | 4.24 | 4.57 | 4.26 | 4.56 | 4.63 | 4.45 |
| 1874.02 | 3.55 | 3.76 | 3.52 | 3.63 | 4.18 | 4.50 | 3.85 | 4.09 | 4.24 | 4.45 | 4.14 |
| 2002.92 | 4.00 | 3.52 | 4.03 | 4.16 | 4.30 | 4.32 | 4.87 | 4.48 | 4.18 | 4.54 | 4.79 |
| 2140.71 | 3.68 | 3.52 | 4.00 | 4.32 | 4.34 | 4.56 | 4.47 | 4.58 | 4.40 | 4.60 | 4.68 |
| 2288.00 | 3.63 | 4.12 | 3.72 | 3.93 | 4.21 | 4.45 | 3.99 | 4.52 | 4.49 | 4.72 | 4.64 |
| 2445.44 | 3.53 | 3.41 | 3.98 | 4.17 | 4.41 | 4.20 | 4.40 | 4.05 | 4.42 | 4.58 | 4.61 |
| 2613.73 | 3.95 | 3.80 | 4.03 | 4.02 | 3.95 | 4.88 | 4.48 | 4.23 | 4.65 | 4.88 | 4.73 |
| 2793.63 | 3.67 | 3.74 | 4.20 | 4.32 | 4.27 | 4.63 | 4.36 | 4.02 | 4.47 | 4.69 | 4.40 |
| 2985.93 | 3.44 | 4.16 | 4.11 | 3.94 | 4.40 | 4.49 | 4.51 | 4.39 | 4.56 | 4.40 | 4.73 |
| 3191.49 | 3.82 | 4.09 | 4.07 | 4.23 | 4.58 | 4.36 | 4.52 | 4.35 | 4.53 | 5.01 | 5.05 |
| 3411.21 | 4.22 | 4.36 | 4.19 | 4.28 | 4.76 | 4.84 | 4.54 | 4.51 | 4.99 | 5.28 | 4.56 |
| 3646.09 | 4.58 | 3.77 | 4.47 | 4.68 | 4.79 | 4.94 | 4.74 | 4.79 | 4.86 | 5.11 | 4.88 |
| 3897.16 | 4.24 | 4.47 | 4.70 | 4.75 | 4.82 | 4.96 | 5.11 | 4.89 | 5.27 | 5.42 | 5.35 |

| Time<br>(ps) | Wavelength<br>h<br>(nm) |        |            |            |            |        |        |        |            |            |            |
|--------------|-------------------------|--------|------------|------------|------------|--------|--------|--------|------------|------------|------------|
|              | 381.08                  | 382.51 | 383.9<br>3 | 385.3<br>6 | 386.7<br>8 | 388.20 | 389.63 | 391.05 | 392.4<br>8 | 393.9<br>0 | 395.3<br>2 |
| -2.74        | 0.35                    | -0.19  | 0.05       | 0.00       | -0.10      | -0.10  | -0.10  | -0.09  | 0.21       | 0.08       | 0.07       |
| -2.24        | -0.10                   | 0.06   | 0.11       | 0.05       | 0.33       | 0.01   | 0.04   | 0.07   | 0.41       | 0.06       | 0.15       |
| -1.74        | -0.07                   | 0.20   | 0.09       | 0.11       | 0.22       | -0.05  | -0.19  | -0.17  | -0.31      | 0.10       | 0.03       |
| -1.24        | -0.02                   | -0.06  | -0.01      | -0.16      | -0.23      | 0.38   | -0.12  | 0.01   | 0.04       | -0.05      | -0.17      |
| -0.74        | -0.17                   | -0.09  | 0.04       | 0.09       | -0.02      | 0.07   | 0.11   | 0.05   | -0.04      | -0.04      | 0.13       |
| -0.24        | 0.10                    | 0.28   | -0.07      | -0.19      | 0.00       | -0.27  | -0.08  | -0.11  | -0.21      | -0.26      | 0.10       |
| -0.14        | 0.14                    | -0.04  | 0.02       | 0.14       | -0.11      | -0.25  | 0.05   | 0.26   | -0.04      | 0.31       | -0.13      |
| -0.04        | -0.22                   | -0.15  | -0.22      | -0.02      | -0.10      | 0.20   | 0.29   | 0.00   | -0.07      | -0.20      | -0.18      |
| 0.06         | 0.07                    | -0.15  | 0.02       | -0.06      | -0.21      | -0.06  | 0.30   | 0.21   | -0.21      | -0.09      | 0.02       |
| 0.16         | 0.03                    | 0.07   | 0.25       | 0.21       | 0.49       | 0.01   | 0.38   | 0.22   | 0.24       | 0.41       | 0.32       |
| 0.26         | 0.13                    | -0.09  | 0.06       | 0.43       | 0.09       | -0.06  | 0.21   | -0.04  | -0.09      | 0.17       | 0.16       |
| 0.31         | 0.13                    | -0.15  | -0.28      | -0.15      | -0.13      | -0.08  | -0.03  | -0.12  | -0.25      | 0.03       | 0.06       |
| 0.36         | -0.13                   | 0.06   | 0.04       | -0.12      | 0.20       | 0.30   | 0.10   | 0.19   | 0.09       | -0.06      | -0.01      |
| 0.41         | 0.10                    | -0.07  | -0.07      | 0.11       | 0.01       | 0.08   | 0.09   | 0.09   | -0.01      | -0.01      | 0.19       |

|      |        |        |            |            |            |        |        |        |            |            |            |
|------|--------|--------|------------|------------|------------|--------|--------|--------|------------|------------|------------|
| 0.46 | 0.27   | -0.20  | -0.17      | -0.08      | -0.17      | -0.19  | -0.13  | -0.02  | -0.08      | -0.13      | 0.14       |
| 0.51 | 0.03   | 0.15   | -0.02      | -0.01      | 0.14       | -0.34  | 0.01   | -0.09  | -0.19      | -0.28      | 0.24       |
| 0.56 | 0.11   | 0.08   | -0.01      | 0.07       | 0.20       | 0.15   | -0.24  | 0.00   | -0.13      | 0.28       | 0.18       |
| 0.61 | 0.33   | 0.04   | 0.06       | 0.49       | -0.10      | -0.07  | 0.03   | -0.09  | -0.07      | 0.07       | 0.10       |
| 0.66 | 0.34   | -0.02  | -0.06      | 0.21       | 0.11       | 0.10   | 0.26   | -0.07  | -0.01      | 0.14       | 0.08       |
| 0.71 | -0.40  | -0.01  | 0.40       | 0.24       | 0.15       | -0.11  | 0.37   | 0.41   | 0.12       | 0.24       | -0.01      |
| 0.76 | -      | -      | -          | -          | -          | -      | -      | -      | -          | -          | -          |
|      | 104.29 | -87.78 | -57.17     | -26.28     | -7.12      | -0.26  | 0.42   | 0.28   | 0.23       | 0.48       | 0.31       |
| 0.81 | 229.11 | 140.69 | 50.84      | -27.93     | -83.88     | -      | -      | -77.15 | -38.64     | -11.43     | -2.53      |
| 0.86 | 344.38 | 384.70 | 395.6<br>7 | 377.7<br>5 | 337.3<br>1 | 280.65 | 216.15 | 150.30 | 87.84      | 30.95      | -26.63     |
| 0.91 | -      | -      | -63.15     | 15.81      | 106.3<br>4 | 187.39 | 247.50 | 287.59 | 321.0<br>1 | 355.8<br>6 | 380.8<br>6 |
| 0.96 | 131.08 | 113.91 | -          | -          | -          | -      | -      | -      | -          | -          | -          |
|      | 12.40  | 13.64  | 17.78      | 10.33      | -19.30     | -62.40 | 100.07 | 113.90 | -95.52     | -42.53     | 49.67      |
| 1.01 | 12.29  | 12.61  | 13.15      | 13.01      | 13.46      | 16.68  | 15.83  | 13.16  | 17.33      | 24.39      | 17.37      |
| 1.06 | 11.46  | 11.41  | 11.66      | 12.71      | 12.82      | 12.89  | 12.67  | 12.19  | 11.91      | 11.83      | 11.37      |
| 1.11 | 11.24  | 11.31  | 11.25      | 11.28      | 11.37      | 11.42  | 12.09  | 11.61  | 11.31      | 12.10      | 12.09      |
| 1.16 | 10.27  | 10.86  | 10.96      | 11.07      | 10.61      | 10.53  | 11.11  | 11.32  | 11.64      | 12.19      | 12.17      |
| 1.21 | 10.06  | 9.81   | 9.74       | 10.45      | 11.16      | 11.10  | 11.23  | 10.94  | 11.18      | 11.57      | 11.22      |
| 1.26 | 9.78   | 10.35  | 10.32      | 10.23      | 9.97       | 10.27  | 10.62  | 10.63  | 10.45      | 10.74      | 10.82      |
| 1.31 | 9.14   | 9.22   | 9.57       | 10.25      | 10.35      | 9.99   | 10.18  | 9.95   | 10.11      | 10.13      | 10.53      |
| 1.36 | 9.14   | 8.78   | 8.77       | 9.18       | 9.34       | 9.59   | 9.73   | 9.61   | 9.57       | 10.18      | 10.07      |
| 1.41 | 9.04   | 9.17   | 9.14       | 8.72       | 9.18       | 8.88   | 9.15   | 9.07   | 9.19       | 9.57       | 9.65       |
| 1.46 | 8.02   | 8.10   | 8.68       | 9.20       | 9.19       | 9.13   | 8.99   | 9.32   | 9.14       | 9.61       | 9.50       |
| 1.51 | 8.99   | 9.01   | 8.87       | 9.16       | 9.05       | 9.25   | 9.40   | 9.67   | 9.12       | 9.48       | 9.59       |
| 1.56 | 8.56   | 9.15   | 9.18       | 8.81       | 8.83       | 8.81   | 9.16   | 9.10   | 9.02       | 9.70       | 9.71       |
| 1.61 | 8.13   | 8.16   | 8.64       | 8.81       | 8.59       | 8.65   | 8.91   | 8.83   | 8.92       | 9.51       | 9.23       |
| 1.66 | 8.73   | 8.53   | 8.58       | 8.71       | 8.76       | 9.02   | 8.88   | 8.95   | 9.18       | 9.30       | 9.41       |
| 1.71 | 7.96   | 8.23   | 8.75       | 8.95       | 8.80       | 8.51   | 8.92   | 8.77   | 8.85       | 8.98       | 9.26       |
| 1.76 | 8.95   | 8.48   | 8.36       | 8.65       | 8.65       | 8.82   | 8.94   | 8.79   | 9.11       | 9.41       | 9.47       |
| 1.81 | 7.79   | 7.89   | 7.58       | 7.75       | 7.94       | 7.82   | 8.07   | 8.37   | 7.98       | 8.72       | 8.41       |
| 1.86 | 7.83   | 7.79   | 8.04       | 8.17       | 8.39       | 8.09   | 8.47   | 8.59   | 8.52       | 8.65       | 8.80       |
| 1.91 | 7.68   | 7.59   | 7.81       | 7.99       | 7.80       | 7.88   | 8.34   | 7.93   | 8.27       | 8.47       | 8.40       |
| 1.96 | 7.93   | 8.02   | 8.17       | 8.22       | 8.21       | 8.05   | 8.10   | 8.35   | 8.14       | 8.56       | 8.71       |
| 2.01 | 7.60   | 7.87   | 7.91       | 8.12       | 8.48       | 8.44   | 8.32   | 8.37   | 8.45       | 8.74       | 8.73       |
| 2.06 | 7.78   | 7.84   | 7.77       | 8.48       | 8.23       | 8.26   | 8.41   | 8.37   | 8.51       | 8.60       | 8.84       |
| 2.11 | 7.64   | 7.58   | 7.72       | 7.92       | 7.96       | 7.70   | 7.99   | 8.15   | 7.93       | 8.45       | 8.58       |
| 2.16 | 7.51   | 7.22   | 7.68       | 8.07       | 8.00       | 7.79   | 8.43   | 7.99   | 8.27       | 8.49       | 8.43       |
| 2.21 | 7.76   | 7.96   | 8.40       | 8.06       | 8.05       | 8.31   | 8.44   | 8.36   | 8.28       | 8.41       | 8.57       |
| 2.26 | 8.01   | 7.74   | 8.10       | 8.70       | 8.67       | 7.98   | 8.36   | 8.51   | 8.07       | 8.83       | 8.75       |
| 2.31 | 7.23   | 7.29   | 7.67       | 7.74       | 7.80       | 7.97   | 8.03   | 8.14   | 7.54       | 8.11       | 7.96       |
| 2.36 | 7.08   | 7.24   | 7.34       | 7.16       | 7.28       | 7.30   | 7.84   | 7.73   | 7.81       | 7.88       | 7.71       |
| 2.41 | 7.20   | 7.27   | 7.05       | 7.47       | 7.73       | 7.66   | 7.81   | 7.77   | 7.64       | 7.90       | 8.04       |
| 2.46 | 7.53   | 7.26   | 7.14       | 7.40       | 7.37       | 7.53   | 8.00   | 8.03   | 8.00       | 7.91       | 8.13       |
| 2.51 | 7.50   | 7.59   | 7.67       | 8.38       | 8.23       | 8.42   | 8.19   | 8.02   | 8.56       | 8.50       | 8.49       |
| 2.56 | 7.32   | 7.75   | 7.73       | 7.62       | 8.04       | 7.78   | 8.02   | 7.90   | 8.00       | 8.45       | 8.16       |
| 2.61 | 7.27   | 7.07   | 7.26       | 7.48       | 7.36       | 7.45   | 7.74   | 7.39   | 7.50       | 7.68       | 8.01       |
| 2.66 | 7.03   | 7.31   | 7.28       | 7.70       | 7.48       | 7.27   | 7.55   | 7.72   | 7.78       | 7.98       | 8.36       |
| 2.71 | 7.57   | 7.72   | 7.54       | 7.67       | 7.84       | 7.94   | 7.89   | 8.15   | 7.94       | 8.02       | 8.34       |
| 2.76 | 7.24   | 7.61   | 7.66       | 7.54       | 8.05       | 7.63   | 7.82   | 8.10   | 7.99       | 8.08       | 8.45       |
| 2.81 | 7.18   | 7.10   | 7.44       | 7.22       | 7.43       | 7.32   | 7.80   | 7.57   | 7.62       | 7.62       | 7.72       |
| 2.86 | 7.02   | 6.63   | 7.11       | 7.11       | 7.11       | 6.97   | 7.37   | 7.19   | 7.21       | 7.62       | 7.68       |

|      |      |      |      |      |      |      |      |      |      |      |      |
|------|------|------|------|------|------|------|------|------|------|------|------|
| 2.91 | 7.00 | 7.28 | 7.33 | 7.45 | 7.43 | 7.22 | 7.90 | 7.35 | 7.65 | 8.09 | 7.95 |
| 2.96 | 7.29 | 7.21 | 7.13 | 7.90 | 7.67 | 7.54 | 7.70 | 7.54 | 7.73 | 8.06 | 8.24 |
| 3.01 | 7.21 | 7.52 | 7.33 | 7.32 | 7.25 | 7.46 | 7.60 | 7.82 | 7.85 | 7.83 | 7.76 |
| 3.06 | 6.93 | 7.17 | 7.27 | 7.68 | 7.49 | 7.71 | 7.61 | 7.53 | 7.26 | 7.88 | 7.67 |
| 3.11 | 7.27 | 7.12 | 7.01 | 7.22 | 7.57 | 7.29 | 7.66 | 7.55 | 7.56 | 7.66 | 7.73 |
| 3.16 | 6.52 | 6.97 | 6.86 | 7.06 | 7.16 | 7.11 | 7.43 | 7.41 | 7.53 | 7.58 | 7.73 |
| 3.21 | 7.32 | 7.28 | 7.39 | 7.27 | 7.38 | 7.33 | 7.87 | 7.66 | 7.67 | 7.79 | 8.15 |
| 3.26 | 7.07 | 6.98 | 7.13 | 7.20 | 7.51 | 7.54 | 7.75 | 7.73 | 7.18 | 7.60 | 7.81 |
| 3.31 | 6.84 | 7.34 | 7.23 | 7.45 | 7.56 | 7.38 | 7.42 | 7.68 | 7.38 | 7.91 | 7.78 |
| 3.36 | 6.77 | 7.29 | 7.18 | 7.18 | 7.45 | 7.52 | 7.60 | 7.44 | 7.74 | 7.79 | 7.90 |
| 3.41 | 7.25 | 7.14 | 7.45 | 7.50 | 7.17 | 7.49 | 7.72 | 7.74 | 7.25 | 7.93 | 7.87 |
| 3.46 | 7.07 | 7.44 | 7.12 | 7.43 | 7.56 | 7.34 | 7.57 | 7.74 | 7.69 | 7.87 | 7.80 |
| 3.51 | 6.97 | 7.10 | 7.32 | 7.17 | 7.23 | 7.28 | 7.54 | 7.45 | 7.22 | 7.60 | 7.77 |
| 3.56 | 7.03 | 6.92 | 7.35 | 7.36 | 7.34 | 7.19 | 7.31 | 7.25 | 7.46 | 7.56 | 7.76 |
| 3.61 | 6.64 | 6.37 | 7.03 | 7.08 | 7.05 | 7.00 | 7.30 | 7.23 | 7.03 | 7.19 | 7.32 |
| 3.66 | 6.75 | 7.01 | 6.69 | 7.09 | 7.25 | 7.27 | 7.52 | 7.41 | 7.53 | 7.63 | 7.61 |
| 3.71 | 7.17 | 7.22 | 7.24 | 7.51 | 7.53 | 7.68 | 7.73 | 7.85 | 7.72 | 8.15 | 8.07 |
| 3.76 | 7.34 | 7.82 | 7.49 | 7.90 | 7.59 | 7.75 | 7.73 | 7.80 | 7.64 | 8.29 | 8.26 |
| 3.81 | 6.83 | 6.86 | 6.68 | 6.97 | 7.00 | 7.40 | 7.46 | 7.11 | 7.20 | 7.64 | 7.55 |
| 3.86 | 6.49 | 6.56 | 6.75 | 6.75 | 6.83 | 7.12 | 7.17 | 6.93 | 7.21 | 7.42 | 7.11 |
| 3.91 | 7.02 | 7.10 | 7.29 | 7.64 | 7.62 | 7.42 | 7.48 | 7.53 | 7.43 | 7.68 | 7.91 |
| 3.96 | 6.70 | 7.52 | 7.05 | 7.45 | 7.33 | 7.27 | 7.67 | 7.62 | 7.72 | 8.13 | 7.80 |
| 4.01 | 7.13 | 7.23 | 7.14 | 7.44 | 7.60 | 7.69 | 7.84 | 7.77 | 7.54 | 8.04 | 7.89 |
| 4.06 | 7.02 | 7.11 | 7.21 | 7.24 | 7.47 | 7.28 | 7.61 | 7.48 | 7.33 | 7.62 | 8.02 |
| 4.11 | 7.02 | 7.10 | 6.71 | 7.03 | 7.01 | 7.35 | 7.58 | 7.37 | 7.29 | 7.71 | 7.48 |
| 4.16 | 7.18 | 6.97 | 7.07 | 7.49 | 7.37 | 7.39 | 7.58 | 7.11 | 7.44 | 7.79 | 7.64 |
| 4.21 | 7.36 | 7.55 | 7.41 | 7.91 | 7.71 | 7.49 | 8.15 | 8.02 | 8.17 | 7.92 | 8.14 |
| 4.26 | 7.17 | 7.36 | 7.26 | 7.40 | 7.71 | 7.46 | 7.91 | 7.30 | 7.63 | 7.77 | 7.98 |
| 4.31 | 6.77 | 6.66 | 6.98 | 6.90 | 6.97 | 6.61 | 7.24 | 7.09 | 7.03 | 7.34 | 7.46 |
| 4.36 | 6.23 | 6.92 | 6.67 | 6.80 | 7.08 | 7.13 | 7.23 | 7.13 | 7.07 | 7.29 | 7.45 |
| 4.41 | 6.48 | 6.91 | 6.68 | 6.96 | 7.24 | 7.11 | 7.35 | 7.13 | 7.02 | 7.47 | 7.48 |
| 4.46 | 7.00 | 7.19 | 7.10 | 7.43 | 7.46 | 7.27 | 7.75 | 7.86 | 7.87 | 7.89 | 7.89 |
| 4.51 | 6.92 | 7.08 | 6.94 | 7.09 | 7.49 | 7.33 | 7.31 | 7.25 | 7.44 | 7.75 | 7.77 |
| 4.56 | 6.40 | 6.86 | 7.04 | 6.98 | 7.15 | 7.02 | 7.29 | 7.30 | 7.22 | 7.74 | 7.52 |
| 4.61 | 6.58 | 6.74 | 6.73 | 7.10 | 7.04 | 6.69 | 6.98 | 7.10 | 7.13 | 7.47 | 7.53 |
| 4.66 | 6.86 | 6.73 | 6.93 | 7.05 | 7.05 | 7.15 | 7.28 | 7.15 | 7.24 | 7.71 | 7.86 |
| 4.71 | 7.24 | 7.33 | 7.34 | 7.77 | 7.71 | 7.50 | 7.89 | 7.81 | 7.72 | 8.09 | 8.20 |
| 4.76 | 7.02 | 7.06 | 7.46 | 7.34 | 7.68 | 7.33 | 7.69 | 7.39 | 7.51 | 7.93 | 7.95 |
| 4.81 | 6.60 | 6.77 | 7.06 | 7.21 | 7.06 | 7.17 | 7.42 | 7.39 | 7.14 | 7.56 | 7.73 |
| 4.86 | 6.56 | 6.41 | 6.86 | 7.35 | 6.99 | 6.96 | 7.26 | 7.12 | 6.97 | 7.97 | 7.58 |
| 4.91 | 6.78 | 7.05 | 6.94 | 7.37 | 7.28 | 6.89 | 7.45 | 7.24 | 7.35 | 7.82 | 7.92 |
| 4.96 | 6.99 | 6.89 | 6.99 | 6.94 | 7.19 | 7.37 | 7.59 | 7.12 | 7.32 | 7.65 | 7.64 |
| 5.01 | 6.66 | 7.06 | 6.83 | 7.24 | 7.60 | 7.31 | 7.39 | 7.44 | 7.19 | 7.55 | 7.62 |
| 5.06 | 6.59 | 6.82 | 6.99 | 6.81 | 7.23 | 6.91 | 7.20 | 7.11 | 7.36 | 7.43 | 7.47 |
| 5.11 | 6.22 | 6.71 | 6.66 | 7.04 | 6.74 | 6.88 | 6.80 | 7.02 | 7.06 | 7.21 | 7.38 |
| 5.16 | 6.32 | 6.82 | 6.78 | 6.93 | 6.87 | 7.15 | 6.95 | 6.94 | 6.92 | 7.36 | 7.49 |
| 5.21 | 6.65 | 6.61 | 6.92 | 6.90 | 7.05 | 6.77 | 7.15 | 7.14 | 6.93 | 7.31 | 7.29 |
| 5.26 | 6.93 | 6.98 | 6.84 | 7.59 | 7.56 | 7.40 | 7.26 | 7.59 | 7.70 | 7.92 | 7.76 |
| 5.31 | 6.67 | 6.69 | 7.03 | 7.25 | 7.38 | 7.15 | 7.46 | 7.22 | 7.17 | 7.53 | 7.46 |
| 5.38 | 6.73 | 6.47 | 6.85 | 6.68 | 6.83 | 6.65 | 6.98 | 6.74 | 6.75 | 7.10 | 7.14 |



|       |      |      |      |      |      |      |      |      |      |      |      |
|-------|------|------|------|------|------|------|------|------|------|------|------|
| 5.45  | 6.81 | 7.15 | 7.24 | 7.22 | 7.30 | 7.38 | 7.51 | 7.14 | 7.42 | 7.69 | 7.66 |
| 5.53  | 6.86 | 6.99 | 6.90 | 7.09 | 7.24 | 7.16 | 7.27 | 7.36 | 7.21 | 7.46 | 7.73 |
| 5.61  | 7.04 | 6.99 | 7.26 | 7.36 | 7.38 | 7.38 | 7.56 | 7.56 | 7.31 | 7.79 | 7.93 |
| 5.70  | 6.75 | 6.75 | 6.73 | 6.70 | 7.10 | 7.18 | 7.30 | 7.37 | 7.08 | 7.57 | 7.78 |
| 5.80  | 6.63 | 6.74 | 6.88 | 7.13 | 6.99 | 7.17 | 7.48 | 7.26 | 7.14 | 7.58 | 7.32 |
| 5.90  | 6.54 | 6.54 | 6.63 | 6.73 | 6.80 | 6.84 | 6.88 | 7.17 | 6.65 | 7.36 | 7.53 |
| 6.01  | 6.96 | 6.98 | 7.48 | 7.38 | 7.43 | 7.10 | 7.41 | 7.39 | 7.43 | 7.92 | 8.20 |
| 6.13  | 6.59 | 6.60 | 6.80 | 7.23 | 7.18 | 6.96 | 7.18 | 7.16 | 7.09 | 7.55 | 7.40 |
| 6.25  | 6.16 | 6.54 | 6.27 | 6.60 | 6.71 | 6.60 | 7.00 | 7.11 | 6.96 | 7.00 | 7.24 |
| 6.39  | 6.11 | 6.26 | 6.48 | 6.52 | 6.32 | 6.32 | 6.57 | 6.60 | 6.71 | 6.75 | 6.98 |
| 6.53  | 6.29 | 6.32 | 6.48 | 6.48 | 6.22 | 6.64 | 6.66 | 6.72 | 6.92 | 6.80 | 6.87 |
| 6.69  | 6.72 | 7.17 | 7.00 | 7.12 | 7.30 | 7.10 | 7.03 | 7.06 | 6.95 | 7.42 | 7.60 |
| 6.85  | 6.29 | 6.20 | 6.69 | 6.66 | 6.55 | 6.79 | 7.01 | 6.99 | 6.78 | 7.30 | 7.16 |
| 7.03  | 6.19 | 6.22 | 6.67 | 6.57 | 6.73 | 6.57 | 6.83 | 6.75 | 6.60 | 7.19 | 7.24 |
| 7.21  | 6.17 | 6.25 | 6.29 | 6.72 | 6.72 | 6.55 | 6.77 | 6.69 | 6.88 | 7.03 | 6.98 |
| 7.41  | 6.25 | 6.16 | 6.68 | 6.72 | 6.80 | 6.66 | 7.14 | 7.01 | 6.93 | 7.38 | 7.36 |
| 7.63  | 6.58 | 6.89 | 7.12 | 6.85 | 7.10 | 7.43 | 7.33 | 7.35 | 7.17 | 7.57 | 7.52 |
| 7.86  | 6.60 | 6.45 | 6.74 | 6.69 | 6.56 | 6.57 | 6.81 | 6.95 | 7.04 | 7.03 | 7.22 |
| 8.10  | 6.18 | 6.11 | 6.37 | 6.52 | 6.66 | 6.57 | 6.82 | 6.67 | 6.67 | 6.80 | 7.12 |
| 8.36  | 5.74 | 6.08 | 5.89 | 5.83 | 6.10 | 6.25 | 6.24 | 6.29 | 6.23 | 6.58 | 6.50 |
| 8.64  | 5.88 | 6.49 | 6.53 | 6.43 | 6.33 | 6.65 | 6.88 | 6.64 | 6.76 | 7.40 | 6.94 |
| 8.94  | 6.43 | 7.07 | 6.76 | 7.16 | 7.23 | 7.05 | 7.59 | 7.11 | 7.43 | 7.50 | 7.50 |
| 9.26  | 6.65 | 6.57 | 6.66 | 7.14 | 6.97 | 7.10 | 7.16 | 7.16 | 7.12 | 7.50 | 7.72 |
| 9.60  | 6.26 | 6.30 | 6.13 | 6.34 | 6.64 | 6.27 | 6.78 | 6.95 | 6.59 | 6.95 | 7.08 |
| 9.97  | 6.06 | 5.54 | 6.20 | 6.54 | 6.24 | 6.32 | 6.62 | 6.48 | 6.39 | 6.75 | 6.73 |
| 10.36 | 6.17 | 6.49 | 6.59 | 6.44 | 6.61 | 6.59 | 7.01 | 6.95 | 6.83 | 7.48 | 7.29 |
| 10.77 | 6.10 | 6.29 | 6.52 | 6.62 | 6.57 | 6.51 | 6.78 | 6.90 | 6.74 | 7.26 | 6.94 |
| 11.22 | 5.90 | 6.07 | 6.25 | 6.60 | 6.33 | 6.33 | 7.04 | 6.76 | 6.53 | 7.09 | 7.00 |
| 11.70 | 5.96 | 6.15 | 6.42 | 6.55 | 6.54 | 6.67 | 6.68 | 6.75 | 6.85 | 7.25 | 7.02 |
| 12.21 | 5.66 | 5.70 | 6.03 | 5.99 | 6.02 | 6.36 | 6.25 | 6.30 | 6.28 | 6.52 | 6.71 |
| 12.75 | 5.78 | 5.78 | 5.85 | 6.20 | 6.01 | 6.01 | 6.46 | 6.54 | 6.53 | 6.48 | 6.86 |
| 13.33 | 6.22 | 6.28 | 6.36 | 6.41 | 6.54 | 6.47 | 6.83 | 6.66 | 6.54 | 7.19 | 7.46 |
| 13.95 | 6.15 | 6.23 | 6.43 | 6.37 | 6.56 | 6.47 | 6.96 | 6.61 | 6.65 | 6.96 | 7.11 |
| 14.62 | 5.62 | 5.79 | 5.77 | 6.42 | 6.03 | 6.32 | 6.26 | 6.56 | 6.23 | 6.51 | 6.52 |
| 15.33 | 5.31 | 5.81 | 5.89 | 5.74 | 5.76 | 6.15 | 6.39 | 5.94 | 5.99 | 6.50 | 6.75 |
| 16.09 | 5.48 | 5.83 | 5.96 | 6.17 | 6.06 | 6.18 | 6.35 | 6.19 | 6.16 | 6.61 | 6.48 |
| 16.90 | 5.82 | 6.09 | 6.21 | 6.14 | 6.14 | 6.32 | 6.62 | 6.58 | 6.56 | 6.79 | 6.69 |
| 17.77 | 5.76 | 5.92 | 6.05 | 6.19 | 6.01 | 6.28 | 6.29 | 6.65 | 6.47 | 6.50 | 6.70 |
| 18.70 | 5.58 | 5.72 | 5.59 | 6.14 | 5.89 | 6.06 | 6.59 | 6.19 | 6.24 | 6.50 | 6.38 |
| 19.69 | 5.64 | 5.56 | 5.64 | 5.81 | 6.11 | 5.92 | 6.07 | 6.16 | 6.05 | 6.15 | 6.19 |
| 20.75 | 5.53 | 5.43 | 5.52 | 5.73 | 5.94 | 5.65 | 6.33 | 6.37 | 6.22 | 6.15 | 6.19 |
| 21.89 | 5.75 | 5.94 | 6.07 | 6.04 | 6.35 | 6.10 | 6.31 | 6.40 | 6.68 | 6.87 | 6.86 |
| 23.10 | 6.29 | 6.22 | 6.06 | 6.55 | 6.57 | 6.70 | 6.74 | 6.67 | 6.84 | 7.02 | 6.97 |
| 24.39 | 5.76 | 5.87 | 5.83 | 5.65 | 6.12 | 6.50 | 6.47 | 5.98 | 6.25 | 6.64 | 6.54 |
| 25.78 | 5.58 | 5.58 | 5.92 | 5.78 | 6.07 | 6.00 | 6.02 | 6.11 | 6.14 | 6.39 | 6.24 |
| 27.26 | 5.37 | 5.44 | 5.76 | 5.95 | 5.74 | 6.00 | 6.15 | 5.93 | 6.17 | 6.45 | 6.53 |
| 28.84 | 5.37 | 5.45 | 5.83 | 5.82 | 6.00 | 5.93 | 6.02 | 6.04 | 6.20 | 6.43 | 6.45 |
| 30.53 | 5.57 | 5.73 | 6.11 | 6.16 | 6.12 | 5.93 | 6.26 | 6.45 | 6.14 | 6.70 | 6.54 |
| 32.34 | 5.70 | 5.57 | 5.94 | 5.91 | 5.93 | 5.90 | 5.71 | 6.02 | 6.20 | 6.30 | 6.47 |
| 34.27 | 5.39 | 5.53 | 5.62 | 6.15 | 6.05 | 6.07 | 6.17 | 5.96 | 6.27 | 6.15 | 6.46 |

|        |      |      |      |      |      |      |      |      |      |      |      |
|--------|------|------|------|------|------|------|------|------|------|------|------|
| 36.34  | 5.20 | 5.29 | 5.60 | 5.82 | 5.86 | 5.93 | 6.11 | 6.17 | 5.63 | 6.37 | 6.24 |
| 38.55  | 5.46 | 5.80 | 5.63 | 6.03 | 5.97 | 5.78 | 6.32 | 6.12 | 6.24 | 6.52 | 6.18 |
| 40.91  | 5.56 | 5.49 | 5.62 | 5.65 | 5.91 | 5.99 | 6.22 | 6.02 | 6.20 | 6.25 | 6.70 |
| 43.43  | 5.22 | 5.07 | 5.56 | 5.49 | 5.63 | 5.36 | 5.43 | 5.86 | 5.42 | 5.83 | 6.03 |
| 46.13  | 5.87 | 5.73 | 5.67 | 5.73 | 5.67 | 5.85 | 6.10 | 6.11 | 5.87 | 6.46 | 6.36 |
| 49.01  | 5.29 | 5.23 | 5.59 | 5.74 | 5.79 | 6.05 | 6.07 | 5.89 | 6.21 | 6.33 | 6.27 |
| 52.09  | 5.20 | 5.27 | 5.61 | 5.57 | 5.58 | 5.76 | 6.04 | 6.14 | 6.03 | 6.08 | 6.07 |
| 55.39  | 5.15 | 5.37 | 5.38 | 5.67 | 5.66 | 5.96 | 5.92 | 5.56 | 5.86 | 6.15 | 6.24 |
| 58.91  | 5.19 | 5.27 | 5.54 | 5.62 | 5.50 | 5.54 | 5.77 | 5.86 | 5.92 | 5.95 | 5.97 |
| 62.68  | 5.20 | 5.20 | 5.32 | 5.35 | 5.41 | 5.70 | 5.76 | 5.42 | 5.69 | 6.16 | 6.06 |
| 66.70  | 4.95 | 5.32 | 5.45 | 5.70 | 5.80 | 5.73 | 5.97 | 6.19 | 6.12 | 6.15 | 6.12 |
| 71.00  | 4.98 | 5.31 | 5.18 | 5.50 | 5.84 | 5.66 | 5.95 | 5.96 | 6.07 | 5.97 | 6.18 |
| 75.60  | 5.36 | 5.14 | 5.29 | 5.58 | 5.53 | 5.42 | 5.85 | 5.73 | 5.40 | 6.15 | 6.09 |
| 80.51  | 5.23 | 5.47 | 5.36 | 5.92 | 5.76 | 5.64 | 5.85 | 5.92 | 6.02 | 6.27 | 6.07 |
| 85.77  | 5.00 | 5.19 | 5.37 | 5.64 | 5.59 | 5.41 | 5.77 | 5.83 | 5.85 | 6.08 | 6.15 |
| 91.38  | 5.18 | 5.28 | 5.34 | 5.41 | 5.74 | 5.50 | 5.78 | 5.90 | 5.83 | 6.16 | 6.05 |
| 97.39  | 5.10 | 5.01 | 5.18 | 5.43 | 5.74 | 5.39 | 5.77 | 5.64 | 5.57 | 5.77 | 6.02 |
| 103.80 | 5.40 | 5.59 | 5.40 | 5.81 | 5.83 | 5.77 | 6.11 | 6.03 | 5.94 | 6.29 | 6.60 |
| 110.66 | 5.20 | 5.01 | 5.38 | 5.49 | 5.77 | 5.75 | 6.05 | 5.95 | 5.79 | 6.10 | 6.29 |
| 117.99 | 4.84 | 5.15 | 5.26 | 5.21 | 5.55 | 5.62 | 5.83 | 5.50 | 5.44 | 5.60 | 5.93 |
| 125.83 | 4.83 | 5.30 | 5.36 | 5.59 | 5.58 | 5.65 | 6.14 | 6.01 | 5.84 | 6.01 | 5.82 |
| 134.21 | 5.04 | 5.22 | 5.37 | 5.75 | 5.51 | 5.47 | 5.53 | 5.70 | 5.81 | 5.96 | 5.87 |
| 143.17 | 5.15 | 5.46 | 5.42 | 5.43 | 5.52 | 5.57 | 5.77 | 5.47 | 5.61 | 5.82 | 6.23 |
| 152.74 | 4.92 | 5.12 | 5.25 | 5.35 | 5.46 | 5.44 | 5.71 | 5.45 | 5.70 | 5.94 | 5.78 |
| 162.97 | 5.25 | 4.96 | 4.98 | 5.53 | 5.30 | 5.24 | 5.67 | 5.53 | 5.55 | 6.02 | 6.11 |
| 173.91 | 4.79 | 5.00 | 5.04 | 5.06 | 5.24 | 5.31 | 5.55 | 5.44 | 5.43 | 5.66 | 6.10 |
| 185.60 | 4.92 | 5.24 | 5.22 | 5.38 | 5.39 | 5.51 | 5.28 | 5.43 | 5.51 | 5.88 | 5.76 |
| 198.10 | 5.24 | 5.25 | 5.43 | 5.20 | 5.26 | 5.27 | 5.44 | 5.66 | 5.73 | 5.85 | 5.91 |
| 211.46 | 5.50 | 5.49 | 5.26 | 5.56 | 5.35 | 5.64 | 6.03 | 5.95 | 5.72 | 6.19 | 6.22 |
| 225.75 | 4.80 | 5.22 | 4.99 | 5.04 | 5.51 | 5.22 | 5.67 | 5.46 | 5.02 | 5.52 | 5.53 |
| 241.01 | 5.22 | 4.82 | 4.98 | 5.40 | 5.41 | 5.18 | 5.38 | 5.16 | 5.25 | 5.69 | 5.81 |
| 257.33 | 4.70 | 4.98 | 5.20 | 5.08 | 5.27 | 4.95 | 5.70 | 5.64 | 5.20 | 5.43 | 5.66 |
| 274.77 | 4.89 | 5.05 | 5.17 | 5.30 | 5.06 | 5.34 | 5.50 | 5.43 | 5.15 | 5.79 | 5.59 |
| 293.42 | 5.01 | 5.08 | 5.62 | 5.35 | 5.69 | 5.39 | 5.64 | 5.46 | 5.84 | 5.87 | 5.71 |
| 313.35 | 5.08 | 4.83 | 5.45 | 5.30 | 5.27 | 5.37 | 5.58 | 5.59 | 5.58 | 5.94 | 5.72 |
| 334.66 | 5.24 | 4.97 | 5.33 | 5.29 | 5.59 | 5.43 | 5.59 | 5.52 | 5.35 | 5.88 | 5.90 |
| 357.43 | 4.68 | 4.73 | 4.78 | 5.09 | 5.34 | 5.22 | 5.18 | 5.46 | 5.51 | 5.49 | 5.60 |
| 381.78 | 4.63 | 4.81 | 4.71 | 4.79 | 5.02 | 5.11 | 5.38 | 5.06 | 5.12 | 5.55 | 5.26 |
| 407.80 | 4.86 | 4.81 | 4.84 | 4.82 | 4.87 | 4.94 | 5.12 | 5.47 | 5.21 | 5.46 | 5.40 |
| 435.62 | 4.82 | 4.91 | 4.98 | 5.55 | 5.48 | 5.33 | 5.49 | 5.33 | 5.31 | 5.75 | 5.51 |
| 465.35 | 4.78 | 5.06 | 4.89 | 5.20 | 5.25 | 5.18 | 5.55 | 5.36 | 5.37 | 5.46 | 5.55 |
| 497.14 | 4.87 | 4.74 | 5.02 | 5.31 | 5.06 | 5.12 | 5.13 | 5.22 | 5.15 | 5.44 | 5.69 |
| 531.11 | 4.64 | 5.00 | 4.53 | 4.85 | 5.02 | 4.92 | 4.98 | 5.20 | 5.02 | 5.43 | 5.11 |
| 567.43 | 4.86 | 4.70 | 5.08 | 4.77 | 4.93 | 5.14 | 5.26 | 5.30 | 5.09 | 5.18 | 5.56 |
| 606.26 | 5.09 | 5.00 | 4.86 | 5.11 | 5.32 | 4.92 | 5.44 | 5.35 | 5.03 | 5.12 | 5.36 |
| 647.76 | 4.97 | 5.25 | 5.39 | 5.42 | 5.38 | 5.01 | 5.45 | 5.44 | 5.54 | 5.48 | 5.81 |
| 692.12 | 4.91 | 5.14 | 4.96 | 5.01 | 5.15 | 4.83 | 5.28 | 5.46 | 5.45 | 5.48 | 5.45 |
| 739.53 | 4.88 | 5.19 | 5.35 | 5.30 | 5.14 | 5.01 | 5.41 | 5.25 | 5.35 | 5.67 | 5.65 |
| 790.22 | 4.41 | 4.59 | 4.73 | 4.86 | 4.86 | 4.65 | 5.10 | 4.88 | 4.77 | 5.38 | 5.07 |
| 844.40 | 4.51 | 4.88 | 4.64 | 5.01 | 4.94 | 4.99 | 5.12 | 5.09 | 5.01 | 5.09 | 5.38 |

|         |      |      |      |      |      |      |      |      |      |      |      |
|---------|------|------|------|------|------|------|------|------|------|------|------|
| 902.32  | 4.99 | 4.95 | 5.03 | 5.16 | 5.48 | 5.12 | 5.83 | 5.42 | 5.48 | 5.82 | 5.81 |
| 964.23  | 4.34 | 4.34 | 4.58 | 4.82 | 4.88 | 5.06 | 5.08 | 5.09 | 4.89 | 5.07 | 5.11 |
| 1030.41 | 5.02 | 4.78 | 5.13 | 5.11 | 5.37 | 5.28 | 5.40 | 5.40 | 5.33 | 5.36 | 5.55 |
| 1101.15 | 4.59 | 5.08 | 4.91 | 5.01 | 5.10 | 5.07 | 5.28 | 5.33 | 5.15 | 5.23 | 5.45 |
| 1176.77 | 4.98 | 5.13 | 4.83 | 4.96 | 5.37 | 5.20 | 5.19 | 5.18 | 5.42 | 5.55 | 5.34 |
| 1257.60 | 5.11 | 5.00 | 5.01 | 5.00 | 5.16 | 5.09 | 5.38 | 5.22 | 5.50 | 5.52 | 5.48 |
| 1344.00 | 4.92 | 4.95 | 5.18 | 4.88 | 5.06 | 5.40 | 5.35 | 5.12 | 5.36 | 5.57 | 5.64 |
| 1436.36 | 4.73 | 4.60 | 4.91 | 5.03 | 4.94 | 5.00 | 5.46 | 5.18 | 5.30 | 5.40 | 5.51 |
| 1535.09 | 4.72 | 4.82 | 4.81 | 5.26 | 5.17 | 5.13 | 5.31 | 5.09 | 5.40 | 5.62 | 5.50 |
| 1640.63 | 4.76 | 4.86 | 4.54 | 4.97 | 4.89 | 5.02 | 5.03 | 5.15 | 5.13 | 5.41 | 5.31 |
| 1753.44 | 4.87 | 4.86 | 4.75 | 4.84 | 4.93 | 4.94 | 5.22 | 5.02 | 4.87 | 5.19 | 5.35 |
| 1874.02 | 4.24 | 4.48 | 4.71 | 4.76 | 4.80 | 4.65 | 4.78 | 4.60 | 4.77 | 4.91 | 5.07 |
| 2002.92 | 4.62 | 4.88 | 4.86 | 5.01 | 4.92 | 5.12 | 5.27 | 5.18 | 5.17 | 5.40 | 5.68 |
| 2140.71 | 4.78 | 4.60 | 4.74 | 5.19 | 4.91 | 5.12 | 5.32 | 5.13 | 5.15 | 5.37 | 5.31 |
| 2288.00 | 4.78 | 4.63 | 4.59 | 4.78 | 4.86 | 4.98 | 4.94 | 4.95 | 5.26 | 5.52 | 5.12 |
| 2445.44 | 4.44 | 4.44 | 4.62 | 4.59 | 4.79 | 4.93 | 5.03 | 5.16 | 5.03 | 5.04 | 5.03 |
| 2613.73 | 4.94 | 4.80 | 4.76 | 5.28 | 5.04 | 4.86 | 5.28 | 5.31 | 5.10 | 5.32 | 5.57 |
| 2793.63 | 4.60 | 4.43 | 4.70 | 4.88 | 4.91 | 4.66 | 5.09 | 5.14 | 4.85 | 5.52 | 5.22 |
| 2985.93 | 4.81 | 4.86 | 4.97 | 5.14 | 5.23 | 4.61 | 5.20 | 5.15 | 4.95 | 5.23 | 5.47 |
| 3191.49 | 4.78 | 5.06 | 4.85 | 5.04 | 5.39 | 5.34 | 5.01 | 5.34 | 5.15 | 5.47 | 5.56 |
| 3411.21 | 5.27 | 5.09 | 5.03 | 4.95 | 5.28 | 5.30 | 5.37 | 5.44 | 5.45 | 5.55 | 5.51 |
| 3646.09 | 5.28 | 5.15 | 5.30 | 5.15 | 5.42 | 5.31 | 5.46 | 5.46 | 5.27 | 5.60 | 5.74 |
| 3897.16 | 5.88 | 5.70 | 5.56 | 5.43 | 5.94 | 5.89 | 5.56 | 5.59 | 5.79 | 5.81 | 6.30 |

| Wavelength (nm) \ Time (ps) | 396.75 | 398.17  | 399.60  | 401.02  | 402.44 | 403.87 | 405.29 | 406.72 | 408.14 | 409.56 | 410.99 |
|-----------------------------|--------|---------|---------|---------|--------|--------|--------|--------|--------|--------|--------|
| -2.74                       | -0.06  | 0.27    | 0.02    | -0.01   | 0.14   | 0.30   | 0.32   | 0.46   | 0.42   | 0.16   | 0.11   |
| -2.24                       | 0.35   | -0.03   | 0.21    | 0.44    | -0.18  | 0.14   | 0.36   | 0.03   | 0.49   | 0.20   | 0.40   |
| -1.74                       | -0.29  | 0.03    | 0.16    | -0.10   | 0.24   | -0.22  | -0.06  | -0.11  | -0.22  | -0.20  | -0.05  |
| -1.24                       | -0.09  | -0.07   | -0.14   | -0.06   | -0.34  | 0.02   | -0.18  | -0.05  | -0.33  | -0.17  | -0.24  |
| -0.74                       | 0.07   | 0.08    | 0.07    | 0.11    | 0.47   | 0.17   | 0.35   | 0.11   | 0.13   | 0.28   | -0.13  |
| -0.24                       | 0.11   | -0.25   | -0.08   | -0.22   | -0.10  | -0.23  | -0.52  | -0.37  | -0.03  | -0.13  | 0.14   |
| -0.14                       | 0.13   | 0.12    | -0.05   | -0.19   | -0.06  | 0.01   | -0.21  | 0.26   | -0.02  | 0.15   | 0.13   |
| -0.04                       | -0.22  | -0.15   | -0.19   | 0.03    | -0.17  | -0.19  | -0.06  | -0.33  | -0.42  | -0.30  | -0.36  |
| 0.06                        | 0.04   | 0.02    | 0.24    | 0.24    | 0.22   | 0.18   | 0.04   | 0.00   | -0.08  | 0.04   | 0.19   |
| 0.16                        | 0.40   | 0.25    | 0.26    | 0.57    | 0.62   | 0.28   | 0.35   | 0.24   | 0.74   | 0.28   | 0.77   |
| 0.26                        | -0.02  | 0.23    | -0.24   | -0.15   | 0.29   | 0.12   | -0.01  | 0.23   | -0.02  | 0.12   | 0.15   |
| 0.31                        | 0.00   | 0.03    | -0.11   | 0.07    | -0.11  | -0.21  | -0.33  | -0.34  | -0.05  | -0.06  | -0.34  |
| 0.36                        | -0.08  | -0.03   | 0.15    | -0.02   | -0.16  | -0.19  | -0.12  | -0.13  | 0.00   | 0.07   | 0.04   |
| 0.41                        | 0.16   | -0.03   | 0.02    | 0.24    | 0.21   | 0.33   | -0.47  | -0.17  | -0.05  | -0.08  | -0.22  |
| 0.46                        | -0.04  | -0.17   | -0.21   | 0.32    | 0.13   | -0.09  | -0.58  | 0.26   | -0.09  | -0.14  | -0.29  |
| 0.51                        | -0.22  | 0.05    | 0.10    | -0.36   | -0.23  | -0.19  | -0.47  | -0.16  | -0.33  | -0.09  | -0.09  |
| 0.56                        | 0.21   | 0.46    | 0.38    | 0.16    | 0.31   | 0.33   | -0.31  | 0.15   | -0.02  | -0.07  | -0.03  |
| 0.61                        | 0.00   | 0.19    | 0.26    | -0.14   | 0.16   | 0.37   | 0.07   | 0.07   | 0.16   | 0.20   | 0.22   |
| 0.66                        | 0.20   | 0.32    | -0.13   | 0.05    | 0.00   | 0.42   | -0.32  | 0.14   | 0.02   | 0.19   | 0.35   |
| 0.71                        | 0.01   | 0.04    | 0.04    | 0.15    | -0.14  | 0.27   | 0.28   | -0.31  | 0.33   | 0.06   | -0.05  |
| 0.76                        | -0.49  | -0.13   | 0.70    | 0.20    | 0.19   | 0.71   | 0.37   | 0.27   | 0.65   | 0.66   | 0.32   |
| 0.81                        | -8.62  | -12.54  | -3.13   | 5.82    | 2.10   | -1.67  | -0.05  | 0.54   | -0.05  | 0.10   | -0.18  |
| 0.86                        | -85.44 | -136.46 | -155.32 | -123.58 | -55.71 | -1.69  | 10.02  | 0.95   | -2.68  | -1.14  | 0.16   |

|      |        |        |         |         |         |         |         |         |        |        |         |
|------|--------|--------|---------|---------|---------|---------|---------|---------|--------|--------|---------|
| 0.91 | 367.78 | 290.88 | 171.01  | 46.08   | -52.57  | -111.11 | -128.07 | -111.05 | -75.50 | -38.54 | -12.12  |
| 0.96 | 175.39 | 314.67 | 423.64  | 462.59  | 439.99  | 398.06  | 359.82  | 334.88  | 322.06 | 313.41 | 299.14  |
| 1.01 | -15.02 | -65.46 | -110.70 | -133.01 | -125.42 | -94.19  | -50.56  | -7.49   | 29.07  | 64.41  | 108.77  |
| 1.06 | 11.41  | 12.82  | 12.95   | 8.50    | 2.74    | 2.54    | 6.37    | -0.08   | -32.67 | -90.69 | -157.18 |
| 1.11 | 11.87  | 11.15  | 10.73   | 10.19   | 9.66    | 8.16    | 4.68    | 0.30    | -0.50  | 4.52   | 11.44   |
| 1.16 | 12.30  | 11.32  | 9.80    | 8.61    | 8.33    | 10.30   | 13.31   | 15.11   | 14.94  | 11.81  | 9.99    |
| 1.21 | 11.40  | 11.48  | 11.71   | 11.76   | 10.56   | 8.94    | 8.11    | 9.93    | 14.09  | 17.02  | 15.25   |
| 1.26 | 10.72  | 10.00  | 9.46    | 9.51    | 10.81   | 12.11   | 13.08   | 11.41   | 8.66   | 6.48   | 7.62    |
| 1.31 | 10.17  | 10.40  | 10.00   | 9.35    | 8.09    | 7.50    | 8.54    | 10.49   | 11.40  | 11.06  | 8.73    |
| 1.36 | 9.93   | 10.27  | 10.48   | 10.79   | 9.68    | 7.96    | 6.34    | 6.26    | 8.49   | 11.75  | 13.09   |
| 1.41 | 9.56   | 8.70   | 7.83    | 7.96    | 8.89    | 10.69   | 11.40   | 10.53   | 8.24   | 6.80   | 7.72    |
| 1.46 | 9.61   | 9.80   | 9.82    | 9.13    | 7.78    | 6.20    | 6.59    | 8.92    | 11.79  | 12.00  | 9.46    |
| 1.51 | 9.28   | 8.84   | 8.78    | 9.63    | 10.22   | 10.35   | 9.05    | 7.25    | 5.69   | 6.93   | 9.08    |
| 1.56 | 9.92   | 9.40   | 8.44    | 8.08    | 8.32    | 9.31    | 10.49   | 10.71   | 9.36   | 7.07   | 6.57    |
| 1.61 | 9.27   | 9.49   | 9.40    | 8.53    | 7.70    | 6.83    | 7.61    | 8.82    | 10.96  | 10.96  | 9.43    |
| 1.66 | 9.02   | 8.53   | 8.57    | 9.67    | 9.78    | 9.54    | 8.63    | 6.95    | 6.24   | 7.36   | 9.18    |
| 1.71 | 9.41   | 9.24   | 8.73    | 7.98    | 7.35    | 7.13    | 8.02    | 9.35    | 10.16  | 9.30   | 7.35    |
| 1.76 | 9.24   | 9.23   | 9.46    | 9.71    | 9.49    | 8.43    | 7.16    | 6.51    | 7.93   | 9.62   | 11.21   |
| 1.81 | 8.32   | 7.72   | 7.37    | 7.46    | 7.81    | 8.58    | 8.79    | 7.87    | 6.81   | 6.18   | 6.96    |
| 1.86 | 8.58   | 8.82   | 8.59    | 8.03    | 7.49    | 7.27    | 8.01    | 9.33    | 9.27   | 8.07   | 7.08    |
| 1.91 | 7.91   | 8.36   | 8.46    | 8.63    | 8.55    | 7.62    | 6.44    | 5.59    | 5.87   | 7.70   | 9.33    |
| 1.96 | 8.82   | 8.38   | 7.77    | 7.53    | 7.39    | 8.07    | 8.72    | 8.76    | 8.27   | 7.20   | 6.85    |
| 2.01 | 8.86   | 8.83   | 8.80    | 8.71    | 7.60    | 7.02    | 6.62    | 7.04    | 8.87   | 10.10  | 9.46    |
| 2.06 | 8.40   | 8.42   | 8.10    | 8.73    | 8.91    | 9.29    | 8.27    | 7.40    | 6.95   | 6.79   | 7.91    |
| 2.11 | 8.37   | 8.27   | 8.25    | 7.59    | 7.26    | 7.37    | 8.09    | 8.20    | 8.26   | 7.57   | 6.74    |
| 2.16 | 8.49   | 8.58   | 8.45    | 8.49    | 7.89    | 7.73    | 6.76    | 6.69    | 7.62   | 9.15   | 9.54    |
| 2.21 | 8.80   | 8.22   | 7.67    | 7.74    | 8.47    | 8.21    | 8.49    | 8.21    | 7.29   | 6.59   | 7.23    |
| 2.26 | 8.82   | 9.10   | 8.20    | 8.43    | 7.13    | 6.71    | 7.14    | 8.28    | 9.10   | 9.32   | 8.01    |
| 2.31 | 8.08   | 8.05   | 7.73    | 7.90    | 7.84    | 7.41    | 6.71    | 6.59    | 6.87   | 7.43   | 8.44    |
| 2.36 | 7.81   | 7.81   | 7.17    | 7.31    | 7.55    | 7.18    | 7.03    | 6.73    | 6.35   | 6.08   | 7.21    |
| 2.41 | 8.13   | 8.32   | 8.25    | 7.36    | 7.05    | 6.95    | 6.43    | 7.31    | 8.47   | 8.36   | 7.59    |
| 2.46 | 8.04   | 7.41   | 7.60    | 8.07    | 7.67    | 7.39    | 7.36    | 6.43    | 6.22   | 6.72   | 7.61    |
| 2.51 | 8.76   | 8.98   | 8.37    | 7.90    | 7.11    | 6.95    | 6.98    | 7.98    | 8.37   | 8.50   | 7.19    |
| 2.56 | 8.11   | 7.99   | 7.68    | 8.14    | 7.56    | 7.20    | 6.79    | 6.95    | 7.60   | 8.38   | 8.68    |
| 2.61 | 7.92   | 7.85   | 7.55    | 7.62    | 7.59    | 7.40    | 7.10    | 6.20    | 6.26   | 6.94   | 7.69    |
| 2.66 | 7.92   | 7.91   | 7.55    | 6.82    | 6.78    | 7.06    | 7.07    | 7.91    | 8.20   | 7.65   | 6.83    |
| 2.71 | 8.17   | 8.31   | 7.98    | 8.04    | 7.81    | 7.49    | 6.74    | 7.18    | 6.86   | 8.44   | 8.82    |
| 2.76 | 8.26   | 7.86   | 7.58    | 7.29    | 7.40    | 7.66    | 7.81    | 7.37    | 7.17   | 6.68   | 6.69    |
| 2.81 | 7.62   | 8.02   | 7.57    | 7.36    | 6.54    | 6.58    | 6.89    | 7.15    | 7.36   | 7.42   | 7.09    |
| 2.86 | 7.39   | 7.53   | 7.54    | 7.27    | 6.71    | 6.74    | 6.80    | 6.17    | 6.63   | 7.18   | 7.43    |
| 2.91 | 8.03   | 7.72   | 7.24    | 7.08    | 7.19    | 7.27    | 7.60    | 7.40    | 7.52   | 6.79   | 6.70    |
| 2.96 | 7.94   | 7.94   | 8.03    | 7.77    | 7.31    | 7.40    | 6.72    | 6.90    | 7.53   | 8.06   | 8.00    |
| 3.01 | 8.27   | 7.81   | 7.53    | 7.13    | 7.18    | 6.94    | 7.31    | 7.31    | 6.82   | 6.57   | 6.77    |
| 3.06 | 7.76   | 7.55   | 7.52    | 7.15    | 6.88    | 6.93    | 6.71    | 7.41    | 7.36   | 7.22   | 6.93    |
| 3.11 | 7.88   | 7.47   | 7.72    | 7.75    | 7.06    | 6.59    | 6.54    | 6.42    | 7.03   | 7.56   | 7.68    |
| 3.16 | 7.56   | 7.25   | 7.22    | 6.98    | 7.09    | 7.03    | 7.29    | 6.93    | 6.82   | 6.45   | 6.65    |
| 3.21 | 8.23   | 7.97   | 7.40    | 7.50    | 7.04    | 6.99    | 7.15    | 7.57    | 7.58   | 7.65   | 7.45    |
| 3.26 | 7.90   | 7.92   | 7.24    | 7.41    | 7.24    | 7.40    | 6.91    | 6.53    | 6.59   | 6.59   | 7.54    |
| 3.31 | 7.82   | 7.60   | 7.49    | 7.41    | 7.24    | 7.64    | 7.04    | 7.26    | 7.43   | 6.99   | 7.01    |
| 3.36 | 7.85   | 7.99   | 7.70    | 7.40    | 6.90    | 6.49    | 6.42    | 7.18    | 7.31   | 7.37   | 7.25    |

|      |      |      |      |      |      |      |      |      |      |      |      |
|------|------|------|------|------|------|------|------|------|------|------|------|
| 3.41 | 7.71 | 7.50 | 7.44 | 7.85 | 7.12 | 7.37 | 7.23 | 6.77 | 6.39 | 7.27 | 7.44 |
| 3.46 | 8.14 | 8.02 | 7.64 | 7.54 | 7.06 | 7.38 | 7.58 | 7.20 | 7.80 | 7.17 | 6.96 |
| 3.51 | 7.65 | 7.70 | 7.55 | 7.71 | 7.29 | 6.94 | 6.28 | 6.44 | 6.90 | 7.07 | 7.41 |
| 3.56 | 7.80 | 7.65 | 7.06 | 7.50 | 6.91 | 7.06 | 7.13 | 6.55 | 6.65 | 7.02 | 6.91 |
| 3.61 | 7.79 | 7.17 | 7.41 | 6.64 | 6.33 | 6.26 | 6.04 | 6.72 | 6.72 | 6.63 | 6.41 |
| 3.66 | 7.82 | 7.62 | 7.68 | 7.38 | 7.39 | 6.79 | 6.86 | 6.93 | 6.60 | 7.22 | 7.41 |
| 3.71 | 8.21 | 8.05 | 7.59 | 7.50 | 7.13 | 6.93 | 6.97 | 7.23 | 7.52 | 6.77 | 7.07 |
| 3.76 | 8.11 | 8.15 | 8.12 | 7.55 | 7.85 | 7.62 | 7.09 | 7.15 | 7.59 | 7.84 | 8.13 |
| 3.81 | 7.44 | 7.57 | 7.27 | 7.14 | 7.14 | 7.14 | 6.48 | 6.56 | 6.93 | 7.10 | 7.23 |
| 3.86 | 7.16 | 7.15 | 6.82 | 6.52 | 6.63 | 6.60 | 6.29 | 6.31 | 6.60 | 6.66 | 6.47 |
| 3.91 | 7.77 | 7.80 | 7.78 | 7.53 | 7.49 | 6.91 | 6.50 | 6.87 | 7.09 | 7.28 | 7.52 |
| 3.96 | 7.74 | 7.77 | 7.28 | 7.36 | 6.95 | 7.08 | 6.44 | 6.72 | 6.70 | 6.55 | 6.94 |
| 4.01 | 8.09 | 7.91 | 7.60 | 7.57 | 7.36 | 7.19 | 7.09 | 7.25 | 7.59 | 7.43 | 7.04 |
| 4.06 | 7.80 | 7.80 | 7.79 | 7.73 | 7.37 | 7.13 | 6.78 | 6.59 | 6.98 | 7.37 | 7.41 |
| 4.11 | 7.56 | 7.53 | 7.47 | 6.85 | 7.08 | 7.35 | 6.59 | 6.98 | 6.86 | 7.05 | 7.01 |
| 4.16 | 7.79 | 7.75 | 7.73 | 7.25 | 6.87 | 6.68 | 6.63 | 6.63 | 7.56 | 7.63 | 7.18 |
| 4.21 | 7.90 | 8.30 | 8.24 | 7.75 | 7.71 | 7.55 | 7.33 | 7.08 | 7.16 | 7.41 | 7.60 |
| 4.26 | 7.97 | 7.90 | 7.57 | 7.65 | 7.34 | 6.89 | 7.18 | 7.31 | 7.36 | 7.32 | 7.46 |
| 4.31 | 7.35 | 7.34 | 7.26 | 7.27 | 6.99 | 6.52 | 6.23 | 6.62 | 6.71 | 6.70 | 6.94 |
| 4.36 | 7.40 | 7.22 | 6.87 | 6.99 | 6.97 | 6.49 | 6.39 | 6.40 | 6.47 | 6.63 | 7.00 |
| 4.41 | 7.39 | 7.27 | 7.09 | 6.94 | 6.65 | 6.61 | 6.30 | 7.04 | 6.83 | 6.95 | 6.71 |
| 4.46 | 8.04 | 7.85 | 7.81 | 7.57 | 7.47 | 7.25 | 6.41 | 6.63 | 6.98 | 7.62 | 7.37 |
| 4.51 | 7.88 | 7.82 | 7.42 | 7.13 | 6.76 | 6.83 | 6.83 | 6.52 | 6.70 | 6.21 | 6.66 |
| 4.56 | 7.46 | 7.48 | 7.56 | 7.27 | 7.04 | 7.09 | 6.20 | 6.75 | 7.20 | 6.85 | 6.93 |
| 4.61 | 7.32 | 7.32 | 7.32 | 7.12 | 6.98 | 6.19 | 6.77 | 6.61 | 6.76 | 7.07 | 7.07 |
| 4.66 | 7.58 | 7.74 | 7.32 | 6.94 | 7.22 | 6.89 | 6.71 | 6.85 | 6.84 | 6.89 | 7.01 |
| 4.71 | 7.66 | 7.80 | 7.68 | 7.86 | 7.32 | 7.02 | 6.96 | 7.31 | 7.67 | 7.67 | 7.92 |
| 4.76 | 7.91 | 7.79 | 7.43 | 7.25 | 7.22 | 6.94 | 6.82 | 6.63 | 6.91 | 6.90 | 7.24 |
| 4.81 | 7.68 | 7.30 | 7.31 | 7.06 | 6.88 | 6.75 | 6.74 | 6.70 | 6.90 | 7.13 | 6.67 |
| 4.86 | 7.64 | 7.67 | 7.31 | 7.28 | 6.61 | 6.66 | 6.57 | 6.43 | 6.56 | 7.10 | 7.00 |
| 4.91 | 7.47 | 7.60 | 7.44 | 7.12 | 6.67 | 7.07 | 6.77 | 6.65 | 6.47 | 6.66 | 6.66 |
| 4.96 | 7.97 | 7.71 | 7.12 | 6.95 | 6.85 | 7.22 | 7.12 | 6.88 | 7.01 | 6.93 | 7.05 |
| 5.01 | 7.81 | 7.62 | 7.18 | 7.43 | 7.33 | 7.54 | 6.89 | 6.60 | 7.05 | 6.94 | 7.09 |
| 5.06 | 7.39 | 7.38 | 7.26 | 7.04 | 6.64 | 6.60 | 6.50 | 6.49 | 6.39 | 6.61 | 6.42 |
| 5.11 | 7.26 | 7.07 | 7.09 | 6.70 | 6.44 | 6.16 | 6.24 | 6.15 | 6.68 | 6.29 | 6.54 |
| 5.16 | 7.44 | 6.96 | 7.07 | 7.25 | 6.62 | 6.52 | 6.51 | 6.46 | 6.63 | 6.67 | 6.89 |
| 5.21 | 7.16 | 7.22 | 6.73 | 7.01 | 6.47 | 6.06 | 6.23 | 6.14 | 6.57 | 6.50 | 6.24 |
| 5.26 | 7.65 | 8.16 | 7.44 | 7.74 | 7.00 | 7.01 | 6.96 | 7.26 | 7.36 | 7.06 | 7.43 |
| 5.31 | 7.67 | 7.39 | 7.04 | 7.09 | 6.66 | 6.92 | 6.52 | 6.62 | 6.80 | 6.76 | 6.82 |
| 5.38 | 7.31 | 7.10 | 6.91 | 6.88 | 6.75 | 6.86 | 5.82 | 6.55 | 6.38 | 6.81 | 6.45 |
| 5.45 | 7.52 | 7.57 | 7.12 | 6.92 | 6.73 | 6.68 | 6.71 | 6.30 | 6.78 | 7.11 | 7.17 |
| 5.53 | 7.41 | 7.61 | 7.18 | 7.21 | 6.76 | 6.87 | 6.83 | 6.69 | 6.59 | 7.17 | 6.74 |
| 5.61 | 7.93 | 7.69 | 7.74 | 7.39 | 7.21 | 6.51 | 6.96 | 6.70 | 7.14 | 7.21 | 7.12 |
| 5.70 | 7.55 | 7.50 | 7.17 | 7.15 | 7.05 | 6.62 | 6.94 | 6.73 | 6.54 | 7.04 | 7.08 |
| 5.80 | 7.46 | 7.46 | 7.04 | 6.78 | 6.80 | 6.56 | 6.29 | 6.58 | 6.84 | 7.01 | 6.76 |
| 5.90 | 7.40 | 7.00 | 6.73 | 6.79 | 6.86 | 6.12 | 6.14 | 6.06 | 6.31 | 6.74 | 6.50 |
| 6.01 | 8.07 | 8.07 | 7.59 | 7.51 | 7.05 | 7.13 | 6.80 | 7.14 | 7.01 | 7.29 | 7.34 |
| 6.13 | 7.60 | 7.31 | 7.27 | 6.92 | 6.49 | 6.91 | 6.50 | 6.66 | 6.76 | 7.07 | 7.21 |
| 6.25 | 6.77 | 7.16 | 6.47 | 6.45 | 6.59 | 6.55 | 6.13 | 6.53 | 6.24 | 7.04 | 6.65 |
| 6.39 | 6.97 | 6.84 | 6.35 | 6.42 | 6.15 | 6.07 | 5.92 | 6.11 | 6.12 | 6.37 | 6.48 |

|       |      |      |      |      |      |      |      |      |      |      |      |
|-------|------|------|------|------|------|------|------|------|------|------|------|
| 6.53  | 7.21 | 6.92 | 6.37 | 6.31 | 6.41 | 6.10 | 5.83 | 6.11 | 6.35 | 6.55 | 6.40 |
| 6.69  | 7.65 | 7.37 | 7.14 | 7.32 | 6.91 | 6.77 | 6.65 | 6.78 | 6.51 | 6.66 | 6.90 |
| 6.85  | 7.26 | 7.02 | 6.97 | 6.74 | 6.48 | 6.84 | 6.43 | 6.25 | 6.59 | 6.51 | 6.42 |
| 7.03  | 7.08 | 7.06 | 6.52 | 6.74 | 6.43 | 6.40 | 5.79 | 6.30 | 6.39 | 6.30 | 6.40 |
| 7.21  | 6.86 | 6.82 | 6.41 | 6.59 | 6.09 | 6.14 | 6.10 | 5.77 | 6.12 | 6.05 | 6.34 |
| 7.41  | 7.17 | 6.83 | 6.97 | 6.73 | 6.95 | 6.69 | 6.43 | 6.34 | 6.75 | 6.77 | 6.94 |
| 7.63  | 7.50 | 7.33 | 6.98 | 7.34 | 6.69 | 6.78 | 6.31 | 6.30 | 6.74 | 6.70 | 7.16 |
| 7.86  | 7.16 | 7.08 | 6.82 | 6.71 | 6.91 | 6.56 | 6.46 | 6.42 | 6.55 | 6.50 | 6.88 |
| 8.10  | 7.10 | 6.75 | 6.77 | 6.52 | 6.37 | 5.84 | 6.00 | 5.70 | 6.41 | 6.40 | 6.57 |
| 8.36  | 6.98 | 6.60 | 6.34 | 6.22 | 6.14 | 6.20 | 5.93 | 6.18 | 5.97 | 5.97 | 5.94 |
| 8.64  | 7.08 | 7.20 | 7.05 | 6.80 | 6.36 | 6.37 | 6.37 | 6.44 | 6.62 | 6.52 | 6.63 |
| 8.94  | 7.61 | 7.52 | 7.50 | 7.06 | 7.21 | 6.76 | 7.04 | 7.17 | 7.14 | 7.50 | 7.10 |
| 9.26  | 7.51 | 7.31 | 7.25 | 7.61 | 6.97 | 6.80 | 6.64 | 6.87 | 6.83 | 7.29 | 7.23 |
| 9.60  | 6.91 | 6.79 | 7.09 | 6.51 | 6.69 | 6.16 | 6.46 | 6.21 | 6.25 | 6.67 | 6.61 |
| 9.97  | 6.71 | 6.67 | 6.32 | 6.34 | 6.35 | 5.65 | 6.11 | 5.84 | 5.91 | 5.99 | 5.67 |
| 10.36 | 7.18 | 7.26 | 7.12 | 6.79 | 6.77 | 6.71 | 6.39 | 6.53 | 7.25 | 6.78 | 6.82 |
| 10.77 | 7.08 | 7.43 | 6.91 | 6.62 | 6.69 | 6.48 | 6.08 | 6.27 | 6.35 | 6.04 | 6.86 |
| 11.22 | 6.86 | 6.60 | 6.78 | 6.50 | 6.01 | 6.20 | 6.44 | 6.02 | 6.25 | 6.27 | 6.34 |
| 11.70 | 7.04 | 6.99 | 6.98 | 6.68 | 6.71 | 6.62 | 6.45 | 6.40 | 6.69 | 6.72 | 6.86 |
| 12.21 | 6.60 | 6.57 | 6.35 | 6.28 | 6.01 | 6.02 | 5.92 | 6.02 | 6.09 | 6.30 | 6.10 |
| 12.75 | 6.68 | 6.84 | 6.58 | 6.72 | 6.17 | 6.10 | 5.48 | 6.04 | 5.84 | 6.21 | 5.97 |
| 13.33 | 7.14 | 6.92 | 6.86 | 6.74 | 6.61 | 6.86 | 5.78 | 6.51 | 6.31 | 6.28 | 6.54 |
| 13.95 | 6.99 | 7.04 | 6.69 | 6.53 | 6.55 | 5.87 | 6.27 | 6.51 | 6.26 | 6.74 | 6.45 |
| 14.62 | 6.62 | 6.47 | 6.29 | 6.13 | 6.37 | 5.60 | 5.54 | 5.58 | 5.75 | 6.06 | 6.08 |
| 15.33 | 6.22 | 6.09 | 6.18 | 6.10 | 6.21 | 5.99 | 5.65 | 5.34 | 5.74 | 5.92 | 5.88 |
| 16.09 | 6.72 | 6.51 | 6.33 | 6.30 | 5.86 | 5.84 | 6.05 | 5.71 | 5.74 | 6.08 | 5.96 |
| 16.90 | 6.68 | 6.48 | 6.34 | 6.38 | 6.04 | 5.68 | 5.92 | 5.88 | 5.35 | 6.11 | 6.13 |
| 17.77 | 7.00 | 6.89 | 6.40 | 6.52 | 6.29 | 6.10 | 6.21 | 5.76 | 6.13 | 6.22 | 6.17 |
| 18.70 | 6.58 | 6.38 | 6.25 | 6.04 | 6.04 | 5.92 | 5.63 | 5.85 | 5.67 | 6.03 | 5.92 |
| 19.69 | 6.17 | 6.52 | 6.14 | 6.17 | 5.89 | 5.79 | 5.20 | 5.18 | 5.37 | 5.78 | 5.61 |
| 20.75 | 6.21 | 6.34 | 5.93 | 5.71 | 5.63 | 5.41 | 5.40 | 5.50 | 5.71 | 5.73 | 5.54 |
| 21.89 | 6.91 | 6.69 | 6.46 | 6.29 | 5.77 | 6.02 | 5.62 | 5.89 | 6.06 | 6.18 | 5.93 |
| 23.10 | 7.04 | 6.83 | 6.83 | 6.62 | 6.41 | 6.11 | 6.37 | 6.46 | 6.58 | 6.44 | 6.44 |
| 24.39 | 6.52 | 6.49 | 6.52 | 6.06 | 5.65 | 5.70 | 5.67 | 5.73 | 5.71 | 6.30 | 6.03 |
| 25.78 | 6.41 | 6.43 | 6.03 | 5.80 | 5.83 | 5.64 | 5.29 | 5.14 | 5.66 | 5.91 | 5.50 |
| 27.26 | 6.54 | 6.31 | 6.50 | 6.14 | 5.91 | 5.65 | 5.65 | 5.76 | 5.65 | 6.11 | 6.25 |
| 28.84 | 6.37 | 6.39 | 6.25 | 5.74 | 5.92 | 5.36 | 5.84 | 5.49 | 5.66 | 5.94 | 5.89 |
| 30.53 | 6.48 | 6.63 | 6.29 | 6.25 | 5.80 | 5.70 | 6.04 | 5.58 | 6.13 | 5.88 | 6.36 |
| 32.34 | 6.46 | 6.40 | 5.94 | 5.88 | 5.59 | 5.60 | 5.62 | 5.55 | 5.84 | 5.70 | 5.93 |
| 34.27 | 6.64 | 6.47 | 6.29 | 6.05 | 5.65 | 5.84 | 5.50 | 5.68 | 6.06 | 5.98 | 5.79 |
| 36.34 | 6.65 | 6.29 | 5.74 | 6.00 | 5.64 | 5.77 | 5.26 | 5.67 | 5.93 | 5.69 | 5.98 |
| 38.55 | 6.43 | 6.35 | 6.11 | 5.78 | 6.12 | 5.41 | 5.22 | 5.52 | 5.63 | 5.69 | 5.77 |
| 40.91 | 6.39 | 6.36 | 6.31 | 6.22 | 6.20 | 5.96 | 5.94 | 6.10 | 5.72 | 5.71 | 5.85 |
| 43.43 | 6.11 | 5.91 | 5.85 | 5.55 | 5.18 | 5.53 | 4.95 | 4.83 | 5.30 | 5.22 | 5.33 |
| 46.13 | 6.57 | 6.37 | 5.92 | 5.97 | 5.75 | 5.57 | 5.48 | 5.70 | 5.84 | 5.99 | 6.00 |
| 49.01 | 6.34 | 6.42 | 6.21 | 6.39 | 5.63 | 5.30 | 5.43 | 5.80 | 5.88 | 6.07 | 5.97 |
| 52.09 | 6.51 | 6.07 | 5.95 | 5.82 | 5.41 | 5.72 | 5.49 | 5.04 | 5.24 | 5.49 | 5.48 |
| 55.39 | 6.09 | 6.00 | 5.83 | 5.85 | 5.56 | 5.85 | 5.30 | 5.57 | 5.34 | 5.46 | 5.43 |
| 58.91 | 6.13 | 5.77 | 5.69 | 5.77 | 5.55 | 5.09 | 5.11 | 5.24 | 5.59 | 5.19 | 5.60 |
| 62.68 | 5.87 | 6.05 | 5.62 | 5.46 | 5.48 | 5.21 | 5.05 | 5.05 | 4.74 | 5.44 | 5.10 |

|         |      |      |      |      |      |      |      |      |      |      |      |
|---------|------|------|------|------|------|------|------|------|------|------|------|
| 66.70   | 6.23 | 5.96 | 5.70 | 5.89 | 5.48 | 5.56 | 5.46 | 4.99 | 5.63 | 5.80 | 5.52 |
| 71.00   | 6.52 | 6.00 | 5.86 | 5.95 | 5.60 | 5.52 | 5.07 | 5.02 | 5.58 | 5.62 | 5.70 |
| 75.60   | 5.91 | 5.68 | 5.78 | 5.61 | 5.19 | 5.43 | 5.05 | 5.11 | 5.26 | 5.31 | 5.62 |
| 80.51   | 6.14 | 6.23 | 6.16 | 5.42 | 5.48 | 5.13 | 5.45 | 5.48 | 5.28 | 5.36 | 5.63 |
| 85.77   | 5.92 | 5.74 | 5.74 | 5.62 | 5.32 | 5.11 | 4.65 | 5.19 | 5.29 | 5.17 | 5.29 |
| 91.38   | 5.82 | 6.23 | 5.58 | 5.86 | 5.52 | 5.54 | 4.99 | 5.16 | 5.29 | 5.32 | 5.54 |
| 97.39   | 5.97 | 5.74 | 5.84 | 5.65 | 5.28 | 5.02 | 5.31 | 5.11 | 5.03 | 5.12 | 5.20 |
| 103.80  | 6.29 | 6.22 | 6.33 | 5.99 | 5.87 | 5.80 | 5.57 | 5.79 | 5.86 | 5.86 | 5.73 |
| 110.66  | 6.06 | 6.25 | 6.31 | 5.71 | 5.56 | 5.44 | 5.60 | 5.32 | 5.46 | 5.77 | 5.65 |
| 117.99  | 5.58 | 5.58 | 5.38 | 5.79 | 5.31 | 5.02 | 4.62 | 4.94 | 4.97 | 4.94 | 5.04 |
| 125.83  | 5.83 | 5.82 | 5.83 | 5.60 | 5.79 | 5.31 | 5.42 | 5.53 | 5.77 | 5.44 | 5.73 |
| 134.21  | 5.98 | 5.72 | 5.88 | 5.34 | 5.18 | 5.71 | 4.97 | 4.95 | 5.41 | 5.51 | 5.33 |
| 143.17  | 5.69 | 5.89 | 5.70 | 5.54 | 5.24 | 5.24 | 4.77 | 4.88 | 5.09 | 5.52 | 5.21 |
| 152.74  | 6.06 | 5.79 | 5.83 | 5.60 | 5.30 | 5.55 | 5.00 | 5.38 | 5.24 | 5.03 | 5.27 |
| 162.97  | 5.68 | 5.50 | 5.67 | 5.76 | 4.97 | 5.23 | 4.47 | 5.11 | 5.38 | 4.98 | 5.29 |
| 173.91  | 5.59 | 5.48 | 5.54 | 5.03 | 5.24 | 4.82 | 4.97 | 4.78 | 5.26 | 5.12 | 5.32 |
| 185.60  | 5.93 | 5.67 | 5.28 | 5.20 | 5.47 | 4.88 | 5.00 | 5.18 | 4.85 | 4.94 | 5.08 |
| 198.10  | 5.96 | 5.90 | 5.46 | 5.45 | 4.81 | 5.06 | 5.11 | 5.12 | 5.09 | 4.83 | 5.21 |
| 211.46  | 6.36 | 6.20 | 5.93 | 5.94 | 6.04 | 5.39 | 5.43 | 5.10 | 5.39 | 5.98 | 5.56 |
| 225.75  | 5.80 | 5.68 | 5.11 | 5.14 | 5.13 | 4.85 | 4.95 | 4.48 | 4.72 | 4.98 | 4.83 |
| 241.01  | 5.67 | 5.74 | 5.44 | 5.40 | 4.59 | 5.39 | 5.10 | 4.94 | 4.65 | 4.93 | 5.13 |
| 257.33  | 5.64 | 5.59 | 5.50 | 5.30 | 5.18 | 4.84 | 4.70 | 4.56 | 4.75 | 5.07 | 4.67 |
| 274.77  | 5.51 | 5.64 | 5.05 | 5.19 | 5.15 | 4.65 | 4.70 | 4.70 | 4.60 | 4.80 | 4.75 |
| 293.42  | 5.74 | 5.84 | 5.44 | 5.21 | 5.69 | 4.93 | 4.68 | 5.03 | 5.31 | 5.12 | 5.17 |
| 313.35  | 5.89 | 5.72 | 5.81 | 5.15 | 5.32 | 5.24 | 5.51 | 5.07 | 5.65 | 5.42 | 5.53 |
| 334.66  | 5.69 | 5.36 | 5.30 | 5.27 | 5.39 | 5.19 | 4.85 | 4.66 | 4.87 | 4.87 | 4.85 |
| 357.43  | 5.46 | 5.37 | 5.09 | 4.90 | 4.88 | 4.23 | 4.75 | 4.91 | 4.87 | 4.64 | 4.82 |
| 381.78  | 5.35 | 5.50 | 5.15 | 5.58 | 5.08 | 5.12 | 4.46 | 4.30 | 4.79 | 4.89 | 4.72 |
| 407.80  | 5.61 | 5.17 | 5.44 | 5.09 | 4.89 | 4.37 | 4.83 | 4.67 | 4.28 | 4.31 | 4.61 |
| 435.62  | 5.87 | 5.72 | 5.36 | 5.16 | 4.97 | 5.02 | 4.47 | 4.43 | 4.59 | 4.61 | 4.65 |
| 465.35  | 5.78 | 5.46 | 5.18 | 5.25 | 5.08 | 4.60 | 4.97 | 5.01 | 4.83 | 5.03 | 5.04 |
| 497.14  | 5.52 | 5.35 | 5.01 | 4.80 | 5.05 | 4.73 | 4.40 | 4.84 | 5.11 | 5.01 | 4.68 |
| 531.11  | 5.15 | 4.86 | 4.89 | 5.01 | 4.94 | 4.63 | 4.35 | 4.48 | 4.27 | 4.34 | 4.77 |
| 567.43  | 5.55 | 5.13 | 5.01 | 4.74 | 4.69 | 4.84 | 4.71 | 4.42 | 4.69 | 4.58 | 4.65 |
| 606.26  | 5.30 | 5.30 | 4.96 | 4.80 | 4.91 | 4.43 | 4.34 | 4.66 | 4.27 | 4.82 | 4.85 |
| 647.76  | 5.90 | 5.94 | 5.50 | 5.09 | 5.16 | 4.73 | 5.10 | 4.88 | 5.31 | 4.99 | 5.20 |
| 692.12  | 5.68 | 5.24 | 5.04 | 5.05 | 5.07 | 4.69 | 4.30 | 5.01 | 4.61 | 5.12 | 5.28 |
| 739.53  | 5.61 | 5.90 | 5.59 | 5.30 | 5.31 | 4.87 | 4.84 | 4.84 | 4.75 | 5.15 | 5.01 |
| 790.22  | 5.17 | 5.19 | 4.78 | 4.76 | 4.71 | 4.47 | 3.98 | 4.14 | 4.31 | 4.40 | 4.50 |
| 844.40  | 5.35 | 5.02 | 5.04 | 5.07 | 4.76 | 4.38 | 4.58 | 4.45 | 4.65 | 4.47 | 4.51 |
| 902.32  | 5.53 | 5.58 | 5.32 | 5.17 | 4.64 | 4.62 | 4.96 | 5.00 | 5.21 | 5.15 | 5.18 |
| 964.23  | 5.26 | 5.11 | 4.73 | 4.33 | 4.38 | 4.12 | 3.75 | 3.97 | 4.71 | 4.07 | 4.13 |
| 1030.41 | 5.75 | 5.43 | 5.31 | 5.56 | 5.23 | 4.87 | 4.46 | 4.58 | 4.71 | 4.99 | 4.94 |
| 1101.15 | 5.21 | 5.11 | 5.23 | 5.16 | 5.04 | 5.03 | 4.81 | 4.77 | 4.72 | 4.75 | 4.86 |
| 1176.77 | 5.48 | 5.26 | 5.38 | 4.75 | 5.08 | 4.93 | 4.76 | 4.37 | 4.41 | 4.66 | 4.83 |
| 1257.60 | 5.58 | 5.62 | 5.02 | 4.89 | 5.13 | 4.95 | 4.33 | 4.89 | 4.80 | 4.68 | 4.62 |
| 1344.00 | 5.87 | 5.60 | 5.45 | 4.71 | 4.89 | 4.76 | 4.28 | 4.87 | 5.24 | 4.90 | 5.09 |
| 1436.36 | 5.51 | 5.53 | 5.09 | 5.21 | 4.87 | 4.94 | 4.89 | 4.68 | 5.01 | 4.94 | 4.82 |
| 1535.09 | 5.52 | 5.52 | 5.29 | 4.94 | 5.01 | 4.46 | 4.48 | 5.07 | 4.89 | 4.78 | 4.65 |
| 1640.63 | 5.16 | 5.20 | 4.85 | 4.56 | 4.36 | 4.08 | 4.19 | 4.38 | 4.35 | 4.13 | 4.31 |

|         |      |      |      |      |      |      |      |      |      |      |      |
|---------|------|------|------|------|------|------|------|------|------|------|------|
| 1753.44 | 5.34 | 5.22 | 4.85 | 5.02 | 4.67 | 4.71 | 4.64 | 4.79 | 4.77 | 4.63 | 4.90 |
| 1874.02 | 4.96 | 4.97 | 4.72 | 4.82 | 4.26 | 3.80 | 3.47 | 3.64 | 3.79 | 3.98 | 3.91 |
| 2002.92 | 5.40 | 5.29 | 5.27 | 5.10 | 5.14 | 4.61 | 4.56 | 4.63 | 5.09 | 4.63 | 4.97 |
| 2140.71 | 5.32 | 5.46 | 4.98 | 5.12 | 4.51 | 4.71 | 4.62 | 4.68 | 4.98 | 4.59 | 4.70 |
| 2288.00 | 5.22 | 5.16 | 5.07 | 4.69 | 4.73 | 4.67 | 4.52 | 4.28 | 4.71 | 4.45 | 4.42 |
| 2445.44 | 5.01 | 5.10 | 5.07 | 4.66 | 4.25 | 4.53 | 4.17 | 4.19 | 4.24 | 4.25 | 4.40 |
| 2613.73 | 5.77 | 5.57 | 5.14 | 5.25 | 4.55 | 4.52 | 4.84 | 4.58 | 4.72 | 4.86 | 4.72 |
| 2793.63 | 5.53 | 5.27 | 5.43 | 4.79 | 4.83 | 4.83 | 4.45 | 4.40 | 4.24 | 4.61 | 4.50 |
| 2985.93 | 5.39 | 5.08 | 5.10 | 5.00 | 4.72 | 4.50 | 4.25 | 4.48 | 4.55 | 4.72 | 4.29 |
| 3191.49 | 5.43 | 5.38 | 5.12 | 4.72 | 4.53 | 4.48 | 4.06 | 4.41 | 4.15 | 4.43 | 4.25 |
| 3411.21 | 5.59 | 5.58 | 5.13 | 5.17 | 4.86 | 4.54 | 4.93 | 4.51 | 4.52 | 5.01 | 4.88 |
| 3646.09 | 5.88 | 5.49 | 5.25 | 5.32 | 4.78 | 4.80 | 4.27 | 4.61 | 4.64 | 4.87 | 4.70 |
| 3897.16 | 6.10 | 6.01 | 5.47 | 5.71 | 5.31 | 4.87 | 4.88 | 4.58 | 5.37 | 4.92 | 5.60 |

| Wavelength<br>h<br>(nm) | 412.41 | 413.84 | 415.26 | 416.68 | 418.1<br>1 | 419.5<br>3 | 420.9<br>6 | 422.3<br>8 | 423.80 | 425.23 | 426.65 |
|-------------------------|--------|--------|--------|--------|------------|------------|------------|------------|--------|--------|--------|
| -2.74                   | 0.29   | 0.35   | 0.25   | 0.12   | 0.31       | 0.13       | 0.20       | 0.19       | 0.22   | 0.10   | 0.20   |
| -2.24                   | 0.08   | 0.19   | 0.16   | 0.26   | 0.22       | 0.14       | 0.16       | 0.11       | 0.05   | 0.03   | -0.08  |
| -1.74                   | -0.14  | -0.39  | -0.35  | -0.33  | -0.40      | -0.38      | -0.36      | -0.29      | -0.41  | -0.40  | -0.39  |
| -1.24                   | -0.12  | -0.02  | -0.19  | -0.16  | -0.11      | -0.06      | -0.11      | -0.02      | -0.03  | 0.00   | 0.15   |
| -0.74                   | 0.30   | 0.45   | 0.61   | 0.21   | 0.20       | 0.24       | 0.08       | 0.03       | 0.33   | 0.23   | 0.21   |
| -0.24                   | -0.15  | -0.09  | 0.00   | -0.01  | 0.05       | 0.02       | 0.04       | 0.01       | 0.00   | 0.09   | -0.02  |
| -0.14                   | 0.08   | -0.01  | -0.10  | 0.13   | 0.09       | 0.09       | 0.26       | 0.20       | 0.13   | 0.20   | 0.19   |
| -0.04                   | -0.35  | -0.47  | -0.38  | -0.23  | -0.36      | -0.16      | -0.28      | -0.22      | -0.31  | -0.26  | -0.26  |
| 0.06                    | 0.09   | 0.17   | 0.16   | 0.07   | 0.18       | 0.36       | 0.27       | 0.32       | 0.32   | 0.12   | 0.16   |
| 0.16                    | 0.48   | 0.81   | 0.52   | 0.52   | 0.56       | 0.60       | 0.53       | 0.50       | 0.38   | 0.39   | 0.20   |
| 0.26                    | 0.24   | 0.19   | 0.18   | 0.22   | 0.26       | 0.30       | 0.12       | 0.26       | 0.14   | 0.21   | 0.17   |
| 0.31                    | -0.30  | -0.48  | -0.40  | -0.28  | -0.38      | -0.35      | -0.39      | -0.26      | -0.46  | -0.31  | -0.31  |
| 0.36                    | -0.30  | -0.21  | -0.11  | 0.05   | -0.12      | -0.03      | -0.02      | 0.02       | -0.14  | -0.15  | -0.03  |
| 0.41                    | 0.13   | 0.10   | 0.15   | 0.07   | 0.07       | 0.22       | 0.18       | 0.18       | 0.21   | 0.23   | 0.16   |
| 0.46                    | -0.08  | -0.14  | -0.22  | -0.05  | -0.08      | -0.02      | -0.15      | -0.12      | -0.12  | -0.04  | -0.12  |
| 0.51                    | -0.09  | -0.03  | -0.34  | -0.38  | -0.17      | 0.00       | -0.07      | -0.03      | -0.09  | -0.11  | 0.01   |
| 0.56                    | 0.12   | 0.15   | 0.10   | 0.10   | 0.27       | 0.26       | 0.14       | 0.22       | 0.21   | -0.02  | 0.18   |
| 0.61                    | 0.04   | 0.26   | 0.17   | 0.33   | 0.26       | 0.47       | 0.34       | 0.35       | 0.24   | 0.09   | 0.18   |
| 0.66                    | 0.21   | 0.19   | 0.13   | 0.16   | 0.30       | 0.21       | 0.31       | 0.25       | 0.22   | 0.15   | 0.09   |
| 0.71                    | 0.39   | 0.27   | -0.11  | 0.00   | 0.06       | 0.34       | 0.17       | 0.28       | 0.23   | 0.25   | 0.14   |
| 0.76                    | 0.51   | 0.30   | 0.48   | 0.22   | 0.19       | 0.12       | 0.13       | 0.27       | 0.14   | 0.11   | 0.05   |
| 0.81                    | 0.33   | 0.27   | 0.16   | 0.22   | 0.26       | 0.31       | 0.20       | 0.12       | 0.09   | -0.08  | 0.05   |
| 0.86                    | -0.10  | -0.18  | 0.38   | 0.19   | -0.32      | -0.25      | 0.15       | 0.25       | 0.18   | 0.12   | 0.21   |
| 0.91                    | 3.03   | 10.45  | 10.63  | 4.35   | -4.45      | -8.20      | -4.71      | 1.26       | 2.57   | 0.38   | -0.64  |
| 0.96                    | 272.90 | 233.23 | 181.58 | 120.78 | 55.55      | -6.69      | -52.60     | -72.01     | -65.01 | -42.34 | -18.55 |
| 1.01                    | 167.99 | 244.20 | 333.76 | 421.34 | 482.0<br>4 | 492.0<br>6 | 450.3<br>3 | 375.2<br>7 | 287.02 | 197.22 | 114.22 |
| 1.06                    | -      | -      | -      | -      | -97.64     | -2.64      | 102.1<br>4 | 205.3<br>5 | 298.32 | 377.93 | 441.06 |
| 1.11                    | 13.37  | 11.61  | 13.58  | 22.42  | 29.75      | 19.72      | -13.80     | -61.53     | 104.33 | 125.35 | 117.56 |
| 1.16                    | 11.82  | 13.83  | 13.55  | 11.40  | 7.96       | 4.92       | 6.50       | 13.52      | 18.75  | 17.28  | 13.27  |
| 1.21                    | 10.76  | 7.35   | 8.25   | 11.57  | 14.87      | 15.96      | 14.80      | 13.25      | 12.47  | 13.06  | 14.02  |
| 1.26                    | 10.88  | 13.41  | 13.23  | 11.61  | 10.48      | 11.07      | 12.77      | 14.19      | 14.17  | 12.11  | 9.51   |
| 1.31                    | 7.91   | 9.49   | 11.96  | 13.51  | 13.21      | 11.51      | 9.83       | 9.28       | 10.24  | 11.41  | 12.19  |



|      |       |       |       |       |       |       |       |       |       |       |       |
|------|-------|-------|-------|-------|-------|-------|-------|-------|-------|-------|-------|
| 1.36 | 11.95 | 9.26  | 8.23  | 9.20  | 11.09 | 12.16 | 11.41 | 9.98  | 8.65  | 9.01  | 10.43 |
| 1.41 | 10.62 | 12.13 | 11.65 | 9.64  | 8.07  | 8.26  | 9.99  | 11.80 | 12.25 | 11.44 | 9.86  |
| 1.46 | 6.92  | 6.38  | 8.46  | 11.24 | 12.45 | 11.59 | 9.66  | 8.65  | 9.17  | 10.57 | 11.54 |
| 1.51 | 11.34 | 11.04 | 9.33  | 8.33  | 8.72  | 10.09 | 11.26 | 11.54 | 9.97  | 8.62  | 7.92  |
| 1.56 | 9.40  | 11.81 | 12.44 | 10.97 | 9.03  | 8.00  | 8.71  | 10.32 | 11.31 | 10.97 | 9.67  |
| 1.61 | 7.11  | 6.74  | 8.47  | 10.20 | 10.74 | 10.19 | 8.66  | 8.31  | 8.79  | 10.02 | 10.91 |
| 1.66 | 10.36 | 9.84  | 8.42  | 7.83  | 8.57  | 10.11 | 11.02 | 10.86 | 9.52  | 8.13  | 7.63  |
| 1.71 | 6.71  | 8.00  | 9.89  | 10.88 | 10.59 | 9.46  | 8.28  | 8.41  | 9.00  | 9.75  | 9.74  |
| 1.76 | 10.56 | 8.90  | 7.96  | 8.51  | 9.62  | 10.72 | 10.17 | 9.17  | 8.06  | 7.82  | 8.69  |
| 1.81 | 8.80  | 9.42  | 8.80  | 7.72  | 7.11  | 7.74  | 8.59  | 9.54  | 9.46  | 8.72  | 7.73  |
| 1.86 | 6.96  | 8.60  | 9.84  | 10.40 | 9.75  | 8.82  | 8.30  | 8.72  | 9.35  | 9.63  | 9.23  |
| 1.91 | 9.62  | 8.40  | 7.49  | 7.38  | 8.36  | 9.41  | 9.45  | 8.67  | 7.53  | 6.97  | 7.08  |
| 1.96 | 7.61  | 8.86  | 9.85  | 9.23  | 8.28  | 7.65  | 7.88  | 8.77  | 9.38  | 9.30  | 8.64  |
| 2.01 | 7.61  | 6.65  | 7.22  | 8.72  | 9.96  | 10.01 | 9.08  | 7.98  | 7.64  | 8.24  | 9.29  |
| 2.06 | 9.14  | 9.51  | 8.75  | 8.03  | 8.02  | 8.71  | 9.43  | 9.62  | 9.09  | 8.16  | 7.37  |
| 2.11 | 7.43  | 8.92  | 9.64  | 9.46  | 8.46  | 7.89  | 8.01  | 8.62  | 9.08  | 8.83  | 8.19  |
| 2.16 | 8.73  | 7.59  | 7.49  | 8.07  | 8.82  | 9.28  | 8.84  | 8.16  | 7.49  | 7.56  | 8.03  |
| 2.21 | 8.34  | 9.40  | 9.03  | 8.30  | 7.94  | 8.24  | 8.89  | 9.53  | 9.41  | 8.59  | 7.77  |
| 2.26 | 7.40  | 7.46  | 8.70  | 9.80  | 9.82  | 9.37  | 8.45  | 8.16  | 8.28  | 8.78  | 9.14  |
| 2.31 | 8.83  | 8.32  | 7.63  | 7.45  | 7.96  | 8.47  | 8.65  | 8.45  | 7.77  | 7.44  | 7.54  |
| 2.36 | 7.81  | 7.83  | 7.80  | 7.40  | 7.42  | 7.57  | 7.98  | 8.30  | 7.87  | 7.23  | 7.01  |
| 2.41 | 6.71  | 6.85  | 7.63  | 8.56  | 8.96  | 8.50  | 7.70  | 7.41  | 7.69  | 8.10  | 8.36  |
| 2.46 | 8.57  | 8.56  | 8.09  | 7.47  | 7.49  | 8.18  | 8.56  | 8.58  | 7.99  | 7.42  | 7.01  |
| 2.51 | 7.00  | 7.22  | 8.67  | 9.28  | 9.00  | 8.42  | 7.68  | 7.93  | 8.35  | 8.71  | 8.79  |
| 2.56 | 8.21  | 7.66  | 7.42  | 8.22  | 8.56  | 8.83  | 8.32  | 8.14  | 7.65  | 7.63  | 7.93  |
| 2.61 | 8.27  | 8.03  | 7.65  | 7.26  | 7.68  | 8.15  | 8.37  | 8.13  | 7.70  | 7.13  | 7.00  |
| 2.66 | 7.04  | 7.74  | 8.54  | 8.77  | 8.35  | 7.85  | 7.48  | 7.81  | 8.11  | 8.32  | 8.01  |
| 2.71 | 8.55  | 8.05  | 7.85  | 8.04  | 8.56  | 9.07  | 8.86  | 8.55  | 7.84  | 7.64  | 7.84  |
| 2.76 | 7.37  | 8.22  | 8.28  | 7.96  | 7.70  | 7.56  | 7.87  | 8.06  | 8.18  | 7.92  | 7.38  |
| 2.81 | 6.67  | 7.04  | 7.54  | 8.02  | 8.13  | 7.80  | 7.45  | 7.18  | 7.29  | 7.37  | 7.54  |
| 2.86 | 7.34  | 7.35  | 6.87  | 7.07  | 7.52  | 7.77  | 7.85  | 7.61  | 7.11  | 6.89  | 6.98  |
| 2.91 | 7.16  | 7.76  | 8.25  | 7.95  | 7.71  | 7.53  | 7.35  | 7.76  | 7.82  | 7.77  | 7.40  |
| 2.96 | 7.56  | 7.34  | 7.66  | 8.15  | 8.50  | 8.63  | 8.19  | 7.84  | 7.80  | 7.66  | 7.97  |
| 3.01 | 7.53  | 7.93  | 8.02  | 7.67  | 7.46  | 7.50  | 7.70  | 8.09  | 7.98  | 7.53  | 7.24  |
| 3.06 | 6.99  | 7.32  | 7.71  | 8.18  | 8.00  | 7.78  | 7.46  | 7.48  | 7.78  | 7.77  | 7.63  |
| 3.11 | 7.23  | 7.46  | 7.39  | 7.61  | 8.05  | 8.29  | 8.03  | 7.61  | 7.54  | 7.47  | 7.48  |
| 3.16 | 7.27  | 7.79  | 7.91  | 7.42  | 7.50  | 7.58  | 7.72  | 8.01  | 7.77  | 7.55  | 7.18  |
| 3.21 | 7.35  | 7.64  | 8.06  | 8.13  | 8.20  | 7.89  | 7.70  | 7.64  | 7.66  | 7.63  | 7.57  |
| 3.26 | 7.55  | 7.43  | 7.25  | 7.11  | 7.33  | 7.73  | 7.73  | 7.68  | 7.37  | 7.01  | 6.83  |
| 3.31 | 7.34  | 7.97  | 8.14  | 8.13  | 7.65  | 7.80  | 7.76  | 7.86  | 7.82  | 7.60  | 7.36  |
| 3.36 | 7.21  | 7.04  | 7.43  | 7.90  | 8.03  | 8.03  | 7.75  | 7.61  | 7.58  | 7.30  | 7.43  |
| 3.41 | 7.89  | 7.94  | 7.70  | 7.50  | 7.66  | 7.85  | 8.22  | 8.12  | 7.83  | 7.39  | 7.22  |
| 3.46 | 7.39  | 7.98  | 8.35  | 8.31  | 8.20  | 7.85  | 7.83  | 7.96  | 8.20  | 8.01  | 7.91  |
| 3.51 | 7.45  | 6.90  | 7.08  | 7.30  | 7.66  | 7.80  | 7.70  | 7.54  | 7.42  | 7.15  | 7.32  |
| 3.56 | 7.43  | 7.66  | 7.70  | 7.36  | 7.35  | 7.60  | 7.68  | 7.73  | 7.55  | 7.18  | 6.82  |
| 3.61 | 6.59  | 6.75  | 7.10  | 7.16  | 7.07  | 7.03  | 6.95  | 6.85  | 7.03  | 6.85  | 6.85  |
| 3.66 | 7.62  | 7.46  | 7.59  | 7.47  | 7.95  | 8.08  | 8.10  | 7.86  | 7.55  | 7.36  | 7.20  |
| 3.71 | 7.31  | 7.64  | 7.85  | 7.91  | 7.75  | 7.73  | 7.69  | 7.68  | 7.78  | 7.64  | 7.31  |
| 3.76 | 7.68  | 7.94  | 8.11  | 8.23  | 8.42  | 8.28  | 8.09  | 7.96  | 8.00  | 7.87  | 7.77  |
| 3.81 | 7.24  | 7.64  | 7.15  | 7.30  | 7.44  | 7.65  | 7.63  | 7.51  | 7.35  | 7.10  | 6.98  |

|      |      |      |      |      |      |      |      |      |      |      |      |
|------|------|------|------|------|------|------|------|------|------|------|------|
| 3.86 | 6.54 | 6.80 | 7.07 | 7.18 | 7.28 | 7.18 | 6.98 | 7.09 | 7.18 | 7.01 | 6.75 |
| 3.91 | 7.55 | 7.68 | 7.44 | 7.90 | 8.14 | 8.31 | 8.14 | 8.03 | 7.51 | 7.56 | 7.46 |
| 3.96 | 7.16 | 7.72 | 7.41 | 7.48 | 7.62 | 7.65 | 7.65 | 7.76 | 7.62 | 7.30 | 7.13 |
| 4.01 | 7.19 | 7.38 | 7.61 | 7.92 | 7.91 | 7.72 | 7.41 | 7.51 | 7.56 | 7.55 | 7.25 |
| 4.06 | 7.41 | 7.39 | 7.57 | 7.76 | 7.94 | 7.93 | 7.82 | 7.87 | 7.55 | 7.35 | 7.37 |
| 4.11 | 7.45 | 7.62 | 7.87 | 7.93 | 7.86 | 7.95 | 7.94 | 8.26 | 8.05 | 7.74 | 7.57 |
| 4.16 | 7.05 | 7.17 | 7.39 | 7.69 | 7.94 | 7.82 | 7.65 | 7.50 | 7.48 | 7.53 | 7.34 |
| 4.21 | 7.79 | 8.03 | 8.04 | 8.10 | 8.30 | 8.33 | 8.38 | 8.49 | 8.25 | 8.11 | 7.90 |
| 4.26 | 7.20 | 7.75 | 7.96 | 8.09 | 8.10 | 8.07 | 7.99 | 8.09 | 7.81 | 7.85 | 7.63 |
| 4.31 | 6.62 | 6.64 | 6.83 | 7.10 | 7.21 | 7.29 | 7.41 | 7.31 | 6.93 | 6.99 | 6.91 |
| 4.36 | 7.02 | 7.00 | 7.17 | 7.22 | 7.44 | 7.55 | 7.56 | 7.56 | 7.14 | 7.06 | 6.97 |
| 4.41 | 6.82 | 7.37 | 7.57 | 7.63 | 7.83 | 7.68 | 7.57 | 7.57 | 7.54 | 7.44 | 7.27 |
| 4.46 | 7.52 | 7.54 | 7.50 | 7.62 | 7.89 | 7.86 | 7.75 | 7.61 | 7.49 | 7.13 | 7.14 |
| 4.51 | 7.13 | 7.39 | 7.23 | 7.39 | 7.32 | 7.49 | 7.29 | 7.37 | 7.41 | 7.29 | 7.21 |
| 4.56 | 6.99 | 7.34 | 7.56 | 7.66 | 7.80 | 7.72 | 7.60 | 7.57 | 7.49 | 7.25 | 7.30 |
| 4.61 | 7.18 | 7.35 | 7.38 | 7.36 | 7.47 | 7.60 | 7.65 | 7.52 | 7.41 | 7.27 | 7.16 |
| 4.66 | 6.89 | 7.29 | 7.55 | 7.56 | 7.69 | 7.67 | 7.56 | 7.70 | 7.53 | 7.23 | 7.11 |
| 4.71 | 7.49 | 7.81 | 7.86 | 7.99 | 8.13 | 8.12 | 7.84 | 7.68 | 7.50 | 7.45 | 7.49 |
| 4.76 | 7.24 | 7.53 | 7.31 | 7.55 | 7.48 | 7.61 | 7.56 | 7.69 | 7.47 | 7.40 | 7.36 |
| 4.81 | 6.88 | 7.34 | 7.63 | 7.58 | 7.52 | 7.73 | 7.46 | 7.55 | 7.37 | 7.29 | 7.13 |
| 4.86 | 7.40 | 7.55 | 7.48 | 7.63 | 7.86 | 7.74 | 7.70 | 7.63 | 7.43 | 7.35 | 7.22 |
| 4.91 | 7.17 | 7.25 | 7.37 | 7.31 | 7.38 | 7.58 | 7.57 | 7.52 | 7.33 | 7.23 | 7.14 |
| 4.96 | 7.23 | 7.41 | 7.42 | 7.69 | 7.67 | 7.63 | 7.66 | 7.53 | 7.31 | 7.23 | 7.15 |
| 5.01 | 7.22 | 7.24 | 7.50 | 7.47 | 7.56 | 7.64 | 7.50 | 7.57 | 7.39 | 7.07 | 7.05 |
| 5.06 | 6.79 | 6.96 | 7.08 | 7.17 | 7.22 | 7.15 | 7.14 | 7.19 | 7.00 | 7.01 | 6.77 |
| 5.11 | 6.81 | 6.81 | 6.85 | 7.01 | 6.97 | 6.97 | 6.84 | 6.67 | 6.64 | 6.63 | 6.52 |
| 5.16 | 6.85 | 6.98 | 7.06 | 7.18 | 7.37 | 7.22 | 7.10 | 7.19 | 6.86 | 6.78 | 6.66 |
| 5.21 | 6.47 | 6.43 | 6.79 | 6.98 | 7.19 | 7.11 | 7.02 | 7.10 | 6.94 | 6.77 | 6.74 |
| 5.26 | 7.37 | 7.81 | 7.74 | 7.94 | 7.92 | 7.83 | 7.72 | 7.59 | 7.49 | 7.37 | 7.29 |
| 5.31 | 7.11 | 7.13 | 7.38 | 7.48 | 7.59 | 7.46 | 7.52 | 7.40 | 7.27 | 7.04 | 6.91 |
| 5.38 | 6.91 | 6.79 | 7.14 | 6.94 | 7.25 | 7.20 | 7.29 | 7.16 | 6.96 | 6.79 | 6.73 |
| 5.45 | 7.37 | 7.31 | 7.24 | 7.56 | 7.52 | 7.46 | 7.58 | 7.56 | 7.35 | 7.18 | 7.22 |
| 5.53 | 7.20 | 7.17 | 7.31 | 7.46 | 7.40 | 7.47 | 7.38 | 7.41 | 7.37 | 7.02 | 6.75 |
| 5.61 | 7.09 | 7.35 | 7.44 | 7.65 | 7.73 | 7.57 | 7.52 | 7.51 | 7.48 | 7.30 | 7.09 |
| 5.70 | 7.32 | 7.20 | 7.26 | 7.38 | 7.55 | 7.54 | 7.42 | 7.42 | 7.30 | 6.98 | 6.94 |
| 5.80 | 7.01 | 7.05 | 7.54 | 7.56 | 7.68 | 7.59 | 7.59 | 7.37 | 7.30 | 7.29 | 7.08 |
| 5.90 | 6.82 | 6.72 | 6.95 | 6.92 | 7.14 | 6.98 | 6.83 | 6.82 | 6.72 | 6.62 | 6.49 |
| 6.01 | 7.37 | 7.44 | 7.66 | 7.76 | 7.87 | 7.88 | 7.74 | 7.65 | 7.54 | 7.34 | 7.18 |
| 6.13 | 7.32 | 7.24 | 7.31 | 7.55 | 7.64 | 7.56 | 7.39 | 7.40 | 7.28 | 7.17 | 7.09 |
| 6.25 | 6.78 | 7.04 | 7.09 | 7.15 | 7.25 | 7.32 | 7.20 | 7.10 | 7.09 | 6.86 | 6.64 |
| 6.39 | 6.68 | 6.90 | 6.88 | 6.95 | 7.09 | 7.15 | 6.94 | 7.03 | 6.76 | 6.84 | 6.63 |
| 6.53 | 6.64 | 6.51 | 6.92 | 6.81 | 7.06 | 7.09 | 6.99 | 7.03 | 6.81 | 6.80 | 6.61 |
| 6.69 | 7.19 | 7.30 | 7.42 | 7.42 | 7.62 | 7.56 | 7.47 | 7.45 | 7.20 | 7.16 | 7.05 |
| 6.85 | 6.64 | 6.91 | 7.06 | 7.32 | 7.36 | 7.45 | 7.18 | 7.16 | 7.06 | 6.87 | 6.74 |
| 7.03 | 6.67 | 6.76 | 6.81 | 6.92 | 7.05 | 7.10 | 7.07 | 7.03 | 6.78 | 6.78 | 6.77 |
| 7.21 | 6.17 | 6.56 | 6.66 | 6.63 | 6.80 | 6.87 | 6.82 | 6.71 | 6.75 | 6.55 | 6.33 |
| 7.41 | 7.00 | 7.01 | 7.33 | 7.29 | 7.41 | 7.31 | 7.26 | 7.23 | 7.04 | 6.88 | 6.70 |
| 7.63 | 7.00 | 7.11 | 7.16 | 7.28 | 7.53 | 7.39 | 7.43 | 7.31 | 7.16 | 7.04 | 6.98 |
| 7.86 | 7.06 | 7.01 | 7.16 | 7.13 | 7.28 | 7.26 | 7.12 | 7.13 | 7.07 | 6.80 | 6.69 |
| 8.10 | 6.46 | 6.81 | 6.88 | 7.00 | 7.06 | 6.98 | 6.90 | 6.91 | 6.71 | 6.58 | 6.41 |

|        |      |      |      |      |      |      |      |      |      |      |      |
|--------|------|------|------|------|------|------|------|------|------|------|------|
| 8.36   | 5.97 | 6.45 | 6.39 | 6.56 | 6.56 | 6.60 | 6.57 | 6.49 | 6.39 | 6.32 | 6.21 |
| 8.64   | 6.74 | 7.15 | 7.09 | 7.13 | 7.28 | 7.23 | 7.15 | 7.22 | 7.07 | 6.87 | 6.69 |
| 8.94   | 7.23 | 7.38 | 7.68 | 7.65 | 7.68 | 7.73 | 7.60 | 7.56 | 7.37 | 7.26 | 7.04 |
| 9.26   | 7.28 | 7.40 | 7.38 | 7.51 | 7.77 | 7.74 | 7.51 | 7.62 | 7.30 | 7.42 | 7.17 |
| 9.60   | 6.75 | 6.77 | 7.12 | 7.08 | 7.18 | 7.22 | 6.91 | 7.05 | 6.77 | 6.71 | 6.51 |
| 9.97   | 6.17 | 6.29 | 6.29 | 6.44 | 6.39 | 6.39 | 6.40 | 6.35 | 6.23 | 6.05 | 5.90 |
| 10.36  | 7.26 | 7.26 | 7.26 | 7.27 | 7.21 | 7.33 | 7.28 | 7.16 | 6.97 | 6.77 | 6.65 |
| 10.77  | 6.59 | 6.79 | 6.92 | 6.86 | 7.04 | 7.14 | 7.15 | 7.05 | 6.78 | 6.84 | 6.57 |
| 11.22  | 6.29 | 6.47 | 6.50 | 6.70 | 6.67 | 6.80 | 6.77 | 6.82 | 6.70 | 6.54 | 6.50 |
| 11.70  | 6.83 | 7.08 | 7.10 | 7.40 | 7.23 | 7.18 | 7.19 | 7.11 | 6.83 | 6.87 | 6.59 |
| 12.21  | 6.17 | 6.74 | 6.66 | 6.75 | 6.79 | 6.77 | 6.59 | 6.59 | 6.47 | 6.29 | 6.02 |
| 12.75  | 6.08 | 6.13 | 6.44 | 6.55 | 6.62 | 6.69 | 6.66 | 6.47 | 6.39 | 6.26 | 6.15 |
| 13.33  | 6.43 | 6.89 | 6.75 | 6.70 | 7.07 | 7.14 | 6.97 | 6.79 | 6.82 | 6.38 | 6.38 |
| 13.95  | 6.73 | 6.81 | 6.79 | 6.79 | 6.88 | 6.96 | 6.95 | 6.81 | 6.69 | 6.53 | 6.52 |
| 14.62  | 6.26 | 6.27 | 6.15 | 6.29 | 6.60 | 6.53 | 6.49 | 6.40 | 6.39 | 6.18 | 6.02 |
| 15.33  | 6.21 | 6.29 | 6.23 | 6.55 | 6.53 | 6.62 | 6.53 | 6.43 | 6.40 | 6.15 | 6.01 |
| 16.09  | 6.18 | 6.33 | 6.37 | 6.36 | 6.43 | 6.53 | 6.51 | 6.33 | 6.20 | 6.05 | 5.96 |
| 16.90  | 6.16 | 6.43 | 6.55 | 6.70 | 6.71 | 6.88 | 6.62 | 6.62 | 6.58 | 6.38 | 6.32 |
| 17.77  | 6.32 | 6.44 | 6.51 | 6.55 | 6.62 | 6.70 | 6.63 | 6.63 | 6.38 | 6.36 | 6.10 |
| 18.70  | 6.23 | 6.22 | 6.21 | 6.48 | 6.61 | 6.71 | 6.66 | 6.62 | 6.38 | 6.47 | 6.30 |
| 19.69  | 5.55 | 6.05 | 6.10 | 6.06 | 6.07 | 6.32 | 6.27 | 6.14 | 6.16 | 5.89 | 5.74 |
| 20.75  | 5.98 | 6.10 | 5.91 | 6.01 | 6.21 | 6.27 | 6.18 | 6.21 | 5.96 | 5.86 | 5.72 |
| 21.89  | 6.14 | 6.41 | 6.65 | 6.51 | 6.90 | 6.71 | 6.71 | 6.68 | 6.20 | 6.15 | 5.88 |
| 23.10  | 6.77 | 6.93 | 6.98 | 7.07 | 7.10 | 7.09 | 7.04 | 7.05 | 6.91 | 6.80 | 6.55 |
| 24.39  | 5.97 | 6.33 | 6.46 | 6.41 | 6.57 | 6.54 | 6.54 | 6.48 | 6.25 | 6.01 | 5.84 |
| 25.78  | 5.60 | 5.76 | 5.90 | 6.01 | 6.09 | 6.18 | 6.10 | 6.16 | 5.95 | 5.79 | 5.69 |
| 27.26  | 6.33 | 6.13 | 6.25 | 6.38 | 6.51 | 6.57 | 6.40 | 6.46 | 6.18 | 6.14 | 5.88 |
| 28.84  | 5.81 | 5.94 | 6.04 | 5.78 | 6.03 | 6.14 | 6.08 | 5.99 | 5.79 | 5.81 | 5.63 |
| 30.53  | 6.03 | 6.38 | 6.43 | 6.42 | 6.44 | 6.53 | 6.64 | 6.61 | 6.18 | 6.12 | 6.11 |
| 32.34  | 5.90 | 5.81 | 5.93 | 5.97 | 6.23 | 6.26 | 6.00 | 6.05 | 5.79 | 5.64 | 5.66 |
| 34.27  | 6.22 | 6.11 | 6.16 | 6.10 | 6.31 | 6.35 | 6.03 | 6.23 | 5.90 | 5.73 | 5.57 |
| 36.34  | 5.85 | 6.24 | 6.20 | 6.40 | 6.36 | 6.40 | 6.28 | 6.35 | 6.23 | 5.88 | 5.78 |
| 38.55  | 5.77 | 5.91 | 5.98 | 6.20 | 6.12 | 6.09 | 6.11 | 6.01 | 5.88 | 5.81 | 5.50 |
| 40.91  | 6.05 | 6.37 | 6.41 | 6.47 | 6.43 | 6.50 | 6.39 | 6.21 | 6.07 | 5.92 | 5.78 |
| 43.43  | 5.51 | 5.45 | 5.54 | 5.62 | 5.59 | 5.59 | 5.53 | 5.45 | 5.43 | 5.14 | 5.01 |
| 46.13  | 6.10 | 6.09 | 6.13 | 6.37 | 6.58 | 6.47 | 6.65 | 6.50 | 6.35 | 6.11 | 5.91 |
| 49.01  | 5.79 | 6.04 | 6.06 | 6.14 | 6.37 | 6.38 | 6.23 | 6.00 | 6.01 | 5.80 | 5.72 |
| 52.09  | 5.68 | 5.83 | 5.60 | 5.65 | 5.91 | 5.91 | 5.91 | 5.87 | 5.74 | 5.56 | 5.47 |
| 55.39  | 5.51 | 5.69 | 5.72 | 5.73 | 5.91 | 6.06 | 5.72 | 5.59 | 5.61 | 5.29 | 5.20 |
| 58.91  | 5.38 | 5.57 | 5.53 | 5.71 | 5.66 | 5.82 | 5.60 | 5.55 | 5.43 | 5.28 | 5.05 |
| 62.68  | 5.25 | 5.46 | 5.62 | 5.79 | 5.69 | 5.77 | 5.54 | 5.62 | 5.43 | 5.18 | 5.10 |
| 66.70  | 5.90 | 6.01 | 6.02 | 6.20 | 6.09 | 6.21 | 6.00 | 5.91 | 5.72 | 5.66 | 5.44 |
| 71.00  | 5.71 | 5.72 | 6.04 | 6.07 | 6.14 | 6.23 | 6.05 | 5.93 | 5.81 | 5.71 | 5.57 |
| 75.60  | 5.47 | 5.57 | 5.82 | 5.86 | 6.00 | 6.00 | 5.76 | 5.88 | 5.68 | 5.65 | 5.46 |
| 80.51  | 5.76 | 5.71 | 5.95 | 5.93 | 5.86 | 5.90 | 5.70 | 5.72 | 5.49 | 5.41 | 5.21 |
| 85.77  | 5.06 | 5.19 | 5.33 | 5.56 | 5.60 | 5.60 | 5.60 | 5.43 | 5.32 | 5.23 | 5.02 |
| 91.38  | 5.52 | 5.73 | 5.81 | 5.77 | 5.77 | 5.78 | 5.68 | 5.70 | 5.47 | 5.28 | 5.07 |
| 97.39  | 5.29 | 5.30 | 5.36 | 5.56 | 5.77 | 5.63 | 5.61 | 5.61 | 5.42 | 5.28 | 5.21 |
| 103.80 | 6.01 | 6.22 | 6.07 | 6.54 | 6.35 | 6.31 | 6.31 | 6.21 | 5.92 | 5.77 | 5.59 |
| 110.66 | 5.61 | 5.87 | 5.91 | 5.98 | 5.96 | 6.01 | 5.89 | 5.85 | 5.66 | 5.47 | 5.22 |

|         |      |      |      |      |      |      |      |      |      |      |      |
|---------|------|------|------|------|------|------|------|------|------|------|------|
| 117.99  | 5.15 | 5.50 | 5.40 | 5.51 | 5.74 | 5.79 | 5.70 | 5.66 | 5.69 | 5.46 | 5.39 |
| 125.83  | 5.58 | 5.49 | 5.69 | 5.75 | 5.84 | 5.73 | 5.70 | 5.79 | 5.39 | 5.28 | 5.13 |
| 134.21  | 5.36 | 5.69 | 5.47 | 5.58 | 5.80 | 5.86 | 5.71 | 5.54 | 5.40 | 5.40 | 5.15 |
| 143.17  | 5.48 | 5.50 | 5.66 | 5.93 | 5.86 | 5.77 | 5.77 | 5.64 | 5.57 | 5.45 | 5.21 |
| 152.74  | 5.62 | 5.60 | 5.52 | 5.66 | 5.68 | 5.68 | 5.65 | 5.50 | 5.28 | 5.00 | 4.99 |
| 162.97  | 5.40 | 5.45 | 5.42 | 5.39 | 5.67 | 5.75 | 5.35 | 5.40 | 5.20 | 5.05 | 4.85 |
| 173.91  | 5.21 | 5.36 | 5.52 | 5.41 | 5.55 | 5.62 | 5.25 | 5.35 | 5.24 | 4.86 | 4.86 |
| 185.60  | 5.26 | 5.40 | 5.24 | 5.44 | 5.43 | 5.38 | 5.38 | 5.35 | 5.05 | 4.91 | 4.71 |
| 198.10  | 5.43 | 5.34 | 5.39 | 5.44 | 5.54 | 5.45 | 5.60 | 5.38 | 5.30 | 5.07 | 4.93 |
| 211.46  | 5.95 | 5.90 | 6.18 | 6.17 | 6.19 | 6.18 | 6.05 | 5.75 | 5.70 | 5.46 | 5.24 |
| 225.75  | 4.77 | 5.08 | 4.98 | 5.13 | 5.26 | 5.26 | 5.21 | 5.14 | 5.05 | 4.91 | 4.73 |
| 241.01  | 5.14 | 5.30 | 5.37 | 5.41 | 5.57 | 5.43 | 5.28 | 5.23 | 5.07 | 4.84 | 4.62 |
| 257.33  | 4.91 | 5.33 | 5.49 | 5.43 | 5.34 | 5.42 | 5.39 | 5.33 | 5.08 | 4.92 | 4.71 |
| 274.77  | 4.87 | 4.96 | 5.19 | 5.19 | 5.36 | 5.34 | 5.17 | 5.08 | 4.89 | 4.77 | 4.52 |
| 293.42  | 5.53 | 5.61 | 5.59 | 5.74 | 5.55 | 5.58 | 5.30 | 5.35 | 5.27 | 4.87 | 4.91 |
| 313.35  | 5.50 | 5.66 | 5.86 | 5.72 | 5.80 | 5.86 | 5.75 | 5.65 | 5.31 | 5.09 | 4.98 |
| 334.66  | 5.18 | 5.00 | 5.22 | 5.02 | 5.26 | 5.32 | 5.23 | 5.15 | 4.94 | 4.76 | 4.64 |
| 357.43  | 4.85 | 4.73 | 4.74 | 4.85 | 4.88 | 4.99 | 4.86 | 4.79 | 4.62 | 4.36 | 4.26 |
| 381.78  | 4.95 | 5.00 | 4.98 | 5.08 | 5.12 | 5.16 | 5.03 | 4.99 | 4.71 | 4.45 | 4.44 |
| 407.80  | 4.80 | 4.83 | 4.87 | 4.81 | 4.79 | 4.69 | 4.80 | 4.67 | 4.46 | 4.27 | 4.03 |
| 435.62  | 4.72 | 5.14 | 5.00 | 5.13 | 5.04 | 5.11 | 5.18 | 5.13 | 4.99 | 4.80 | 4.59 |
| 465.35  | 4.96 | 5.26 | 5.20 | 5.31 | 5.21 | 5.13 | 4.92 | 4.99 | 4.76 | 4.43 | 4.37 |
| 497.14  | 5.13 | 5.14 | 4.99 | 5.29 | 5.15 | 5.03 | 5.06 | 4.91 | 4.68 | 4.55 | 4.15 |
| 531.11  | 4.27 | 4.48 | 4.73 | 4.50 | 4.60 | 4.56 | 4.51 | 4.55 | 4.36 | 4.16 | 4.04 |
| 567.43  | 5.04 | 4.87 | 4.84 | 5.07 | 5.00 | 5.15 | 4.89 | 4.69 | 4.46 | 4.35 | 4.24 |
| 606.26  | 4.63 | 4.74 | 4.83 | 4.85 | 4.85 | 4.94 | 4.66 | 4.70 | 4.37 | 4.21 | 4.04 |
| 647.76  | 5.24 | 5.37 | 5.46 | 5.75 | 5.48 | 5.50 | 5.38 | 5.22 | 4.91 | 4.62 | 4.45 |
| 692.12  | 4.95 | 4.86 | 5.19 | 5.29 | 5.25 | 5.26 | 5.03 | 5.06 | 4.89 | 4.66 | 4.43 |
| 739.53  | 5.13 | 5.09 | 5.30 | 5.50 | 5.34 | 5.26 | 5.18 | 5.09 | 4.84 | 4.61 | 4.40 |
| 790.22  | 4.29 | 4.36 | 4.42 | 4.39 | 4.61 | 4.47 | 4.28 | 4.27 | 4.24 | 3.96 | 3.78 |
| 844.40  | 4.49 | 4.82 | 4.82 | 4.85 | 4.86 | 4.74 | 4.64 | 4.49 | 4.40 | 4.06 | 3.96 |
| 902.32  | 4.89 | 5.28 | 5.36 | 5.26 | 5.47 | 5.26 | 5.02 | 5.05 | 4.85 | 4.63 | 4.39 |
| 964.23  | 4.32 | 4.36 | 4.39 | 4.55 | 4.50 | 4.57 | 4.24 | 4.23 | 4.05 | 3.88 | 3.78 |
| 1030.41 | 5.00 | 5.16 | 5.28 | 5.20 | 5.18 | 4.94 | 4.80 | 4.73 | 4.46 | 4.23 | 4.05 |
| 1101.15 | 4.93 | 4.91 | 5.12 | 5.18 | 5.22 | 5.13 | 4.95 | 4.91 | 4.66 | 4.66 | 4.29 |
| 1176.77 | 5.05 | 5.04 | 5.08 | 5.07 | 4.85 | 4.96 | 4.65 | 4.72 | 4.41 | 4.35 | 4.11 |
| 1257.60 | 5.02 | 5.03 | 4.90 | 5.00 | 5.04 | 4.90 | 4.91 | 4.71 | 4.39 | 4.20 | 4.06 |
| 1344.00 | 5.23 | 5.34 | 5.05 | 5.33 | 5.30 | 5.30 | 5.16 | 4.96 | 4.62 | 4.59 | 4.27 |
| 1436.36 | 5.09 | 5.28 | 5.27 | 5.17 | 5.24 | 5.09 | 5.12 | 4.95 | 4.70 | 4.51 | 4.33 |
| 1535.09 | 4.64 | 4.76 | 4.83 | 4.92 | 4.98 | 4.90 | 4.74 | 4.62 | 4.46 | 4.30 | 4.02 |
| 1640.63 | 4.45 | 4.62 | 4.55 | 4.66 | 4.55 | 4.65 | 4.48 | 4.50 | 4.33 | 4.08 | 3.86 |
| 1753.44 | 4.95 | 4.95 | 5.19 | 5.03 | 4.96 | 4.98 | 4.94 | 4.77 | 4.57 | 4.29 | 4.08 |
| 1874.02 | 3.79 | 3.95 | 4.02 | 4.12 | 4.05 | 4.06 | 3.84 | 3.73 | 3.74 | 3.42 | 3.31 |
| 2002.92 | 5.16 | 5.37 | 5.18 | 5.17 | 5.17 | 5.21 | 4.85 | 4.86 | 4.61 | 4.24 | 4.16 |
| 2140.71 | 5.00 | 4.99 | 5.07 | 5.02 | 5.14 | 4.99 | 4.81 | 4.69 | 4.50 | 4.22 | 4.02 |
| 2288.00 | 4.56 | 4.52 | 4.57 | 4.79 | 4.70 | 4.66 | 4.47 | 4.42 | 4.22 | 3.85 | 3.67 |
| 2445.44 | 4.45 | 4.41 | 4.49 | 4.39 | 4.56 | 4.39 | 4.17 | 4.09 | 4.02 | 3.75 | 3.61 |
| 2613.73 | 4.87 | 4.81 | 4.78 | 5.07 | 4.88 | 4.80 | 4.68 | 4.53 | 4.58 | 4.24 | 4.13 |
| 2793.63 | 4.63 | 4.65 | 4.64 | 4.83 | 4.64 | 4.58 | 4.44 | 4.34 | 4.13 | 3.76 | 3.69 |
| 2985.93 | 4.57 | 4.76 | 4.63 | 4.67 | 4.61 | 4.55 | 4.45 | 4.27 | 4.16 | 3.81 | 3.61 |

|                    |            |            |            |            |        |        |        |        |        |        |        |
|--------------------|------------|------------|------------|------------|--------|--------|--------|--------|--------|--------|--------|
| 3191.49            | 4.46       | 4.32       | 4.45       | 4.63       | 4.55   | 4.52   | 4.48   | 4.35   | 4.15   | 3.85   | 3.65   |
| 3411.21            | 4.84       | 5.16       | 4.92       | 5.10       | 5.15   | 4.96   | 4.87   | 4.73   | 4.51   | 4.27   | 4.09   |
| 3646.09            | 4.89       | 5.02       | 4.84       | 4.97       | 4.97   | 4.80   | 4.71   | 4.63   | 4.50   | 4.25   | 3.92   |
| 3897.16            | 5.45       | 5.51       | 5.49       | 5.65       | 5.70   | 5.44   | 5.55   | 5.28   | 5.17   | 4.96   | 4.63   |
| Wavelength<br>(nm) | 428.0<br>8 | 429.5<br>0 | 430.9<br>2 | 432.3<br>5 | 433.77 | 435.20 | 436.62 | 438.05 | 439.47 | 440.89 | 442.32 |
| Time<br>(ps)       |            |            |            |            |        |        |        |        |        |        |        |
| -2.74              | 0.22       | 0.23       | 0.22       | 0.23       | 0.27   | 0.38   | 0.26   | 0.29   | 0.27   | 0.32   | 0.23   |
| -2.24              | -0.14      | -0.06      | 0.01       | -0.09      | -0.05  | -0.22  | -0.11  | -0.14  | -0.22  | -0.20  | -0.14  |
| -1.74              | -0.39      | -0.45      | -0.41      | -0.37      | -0.40  | -0.45  | -0.39  | -0.33  | -0.30  | -0.21  | -0.18  |
| -1.24              | -0.07      | 0.04       | 0.08       | 0.07       | 0.07   | 0.11   | 0.14   | -0.05  | 0.11   | 0.04   | 0.03   |
| -0.74              | 0.22       | 0.15       | 0.20       | 0.17       | 0.17   | 0.26   | 0.22   | 0.20   | 0.17   | 0.13   | 0.14   |
| -0.24              | 0.09       | 0.10       | 0.09       | 0.16       | 0.09   | -0.07  | 0.03   | 0.03   | -0.02  | 0.02   | 0.01   |
| -0.14              | 0.20       | 0.25       | 0.02       | 0.13       | 0.06   | 0.17   | 0.04   | 0.09   | 0.04   | -0.03  | 0.05   |
| -0.04              | -0.15      | -0.25      | -0.20      | -0.30      | -0.22  | -0.19  | -0.19  | -0.07  | -0.05  | -0.06  | -0.14  |
| 0.06               | 0.28       | 0.09       | 0.27       | 0.17       | 0.19   | 0.13   | 0.10   | 0.12   | 0.04   | -0.06  | -0.03  |
| 0.16               | 0.16       | 0.18       | 0.22       | 0.01       | 0.06   | -0.01  | -0.07  | -0.14  | -0.19  | -0.18  | -0.18  |
| 0.26               | 0.13       | 0.03       | 0.06       | -0.01      | 0.01   | 0.00   | 0.07   | -0.08  | -0.01  | -0.09  | 0.02   |
| 0.31               | -0.23      | -0.25      | -0.15      | -0.27      | -0.14  | -0.14  | -0.13  | -0.17  | -0.22  | -0.14  | -0.16  |
| 0.36               | -0.11      | -0.07      | -0.08      | -0.10      | -0.07  | -0.05  | -0.05  | -0.05  | -0.04  | -0.11  | -0.11  |
| 0.41               | 0.15       | 0.16       | 0.25       | 0.24       | 0.14   | 0.16   | 0.12   | 0.06   | 0.15   | 0.06   | 0.16   |
| 0.46               | -0.14      | -0.06      | -0.13      | -0.16      | -0.08  | -0.12  | -0.12  | -0.08  | -0.08  | -0.13  | -0.05  |
| 0.51               | -0.01      | -0.02      | 0.03       | 0.11       | -0.03  | -0.07  | -0.02  | 0.09   | -0.05  | -0.02  | 0.02   |
| 0.56               | -0.01      | 0.06       | 0.19       | 0.03       | -0.03  | 0.02   | -0.17  | -0.16  | -0.17  | -0.13  | -0.11  |
| 0.61               | 0.23       | 0.15       | 0.18       | 0.12       | 0.13   | 0.04   | -0.01  | 0.01   | 0.08   | 0.07   | 0.03   |
| 0.66               | 0.17       | 0.19       | 0.12       | 0.11       | 0.15   | 0.01   | -0.06  | 0.02   | -0.06  | -0.02  | -0.08  |
| 0.71               | 0.20       | 0.28       | 0.12       | 0.14       | 0.17   | 0.13   | 0.02   | 0.07   | 0.01   | 0.08   | -0.02  |
| 0.76               | 0.20       | 0.16       | 0.36       | 0.27       | 0.16   | 0.10   | -0.05  | -0.15  | -0.14  | -0.27  | -0.20  |
| 0.81               | 0.09       | 0.00       | 0.07       | 0.03       | 0.22   | 0.10   | 0.09   | -0.01  | 0.18   | 0.09   | 0.16   |
| 0.86               | 0.27       | 0.25       | 0.30       | 0.22       | 0.18   | 0.26   | 0.34   | 0.30   | 0.23   | 0.10   | 0.24   |
| 0.91               | 0.01       | 0.36       | 0.09       | -0.08      | 0.11   | -0.02  | -0.11  | -0.02  | -0.16  | -0.05  | -0.14  |
| 0.96               | -3.98      | 0.62       | -0.10      | -1.14      | -0.97  | -0.26  | 0.19   | 0.06   | -0.35  | -0.17  | 0.04   |
| 1.01               | 40.68      | -20.15     | -66.67     | -96.90     | -      | -      | -78.85 | -49.21 | -21.52 | -3.17  | 4.07   |
| 1.06               | 482.5<br>1 | 498.0<br>6 | 482.9<br>9 | 439.7<br>3 | 379.11 | 308.98 | 235.96 | 166.11 | 102.27 | 46.10  | -0.94  |
| 1.11               | -79.99     | -16.37     | 67.02      | 163.2<br>6 | 264.19 | 358.82 | 440.69 | 504.64 | 548.86 | 572.27 | 576.22 |
| 1.16               | 14.28      | 22.04      | 27.64      | 17.15      | -15.86 | -64.64 | 115.25 | 152.33 | 166.98 | 155.46 | 119.25 |
| 1.21               | 13.07      | 10.85      | 8.63       | 5.56       | 3.01   | 5.30   | 14.02  | 22.75  | 23.83  | 16.60  | 9.90   |
| 1.26               | 7.99       | 8.24       | 9.91       | 12.27      | 13.90  | 14.08  | 12.60  | 10.96  | 9.91   | 10.19  | 10.98  |
| 1.31               | 11.82      | 11.01      | 10.30      | 10.37      | 11.20  | 12.53  | 13.15  | 12.31  | 9.96   | 7.05   | 5.33   |
| 1.36               | 12.17      | 12.82      | 12.40      | 10.29      | 8.17   | 6.79   | 7.12   | 8.89   | 10.64  | 11.34  | 10.44  |
| 1.41               | 8.63       | 8.44       | 9.20       | 10.32      | 10.97  | 10.27  | 8.56   | 6.92   | 6.48   | 7.67   | 10.03  |
| 1.46               | 11.30      | 9.83       | 8.06       | 6.62       | 6.88   | 8.59   | 10.72  | 11.84  | 11.20  | 8.73   | 6.00   |
| 1.51               | 8.23       | 9.55       | 10.60      | 11.16      | 10.38  | 8.94   | 7.41   | 7.10   | 7.82   | 9.07   | 10.02  |
| 1.56               | 8.44       | 7.91       | 8.38       | 9.64       | 10.64  | 10.60  | 9.02   | 6.74   | 4.89   | 4.84   | 6.55   |
| 1.61               | 10.56      | 9.30       | 7.69       | 6.43       | 6.28   | 7.31   | 8.73   | 9.62   | 8.96   | 7.38   | 5.86   |
| 1.66               | 8.03       | 9.01       | 9.68       | 9.81       | 9.07   | 7.75   | 6.84   | 7.15   | 8.27   | 9.43   | 9.96   |
| 1.71               | 9.06       | 8.05       | 7.28       | 7.31       | 8.18   | 9.24   | 9.89   | 9.30   | 7.56   | 5.63   | 4.54   |
| 1.76               | 9.74       | 10.36      | 10.12      | 8.89       | 7.56   | 6.53   | 6.48   | 7.49   | 8.51   | 8.82   | 7.99   |

|      |      |      |      |      |      |      |      |      |      |      |      |
|------|------|------|------|------|------|------|------|------|------|------|------|
| 1.81 | 7.18 | 7.46 | 8.07 | 8.53 | 8.46 | 7.77 | 6.57 | 5.65 | 5.76 | 6.54 | 7.84 |
| 1.86 | 8.48 | 7.49 | 6.97 | 7.21 | 7.82 | 8.62 | 8.76 | 8.09 | 6.78 | 5.46 | 5.04 |
| 1.91 | 7.83 | 8.67 | 8.84 | 8.46 | 7.24 | 6.20 | 5.83 | 6.31 | 7.21 | 7.83 | 7.43 |
| 1.96 | 7.77 | 7.41 | 7.43 | 7.96 | 8.42 | 8.31 | 7.71 | 6.35 | 5.30 | 5.07 | 5.76 |
| 2.01 | 9.65 | 9.11 | 8.04 | 6.94 | 6.18 | 6.42 | 7.57 | 8.64 | 8.84 | 7.76 | 6.24 |
| 2.06 | 7.31 | 7.81 | 8.40 | 8.53 | 8.15 | 7.27 | 6.32 | 5.79 | 6.06 | 6.89 | 7.41 |
| 2.11 | 7.59 | 7.28 | 7.17 | 7.37 | 8.00 | 8.03 | 7.30 | 6.38 | 5.32 | 4.94 | 5.11 |
| 2.16 | 8.58 | 8.45 | 7.99 | 7.04 | 6.18 | 5.71 | 6.01 | 6.66 | 7.39 | 7.12 | 6.36 |
| 2.21 | 7.27 | 7.31 | 7.93 | 8.20 | 8.24 | 7.70 | 6.76 | 6.06 | 5.79 | 6.28 | 7.04 |
| 2.26 | 8.88 | 8.23 | 7.43 | 6.96 | 6.98 | 7.63 | 8.06 | 8.09 | 7.38 | 6.20 | 5.25 |
| 2.31 | 7.94 | 8.28 | 8.42 | 8.06 | 7.36 | 6.68 | 6.12 | 6.16 | 6.69 | 7.00 | 6.81 |
| 2.36 | 6.97 | 6.98 | 7.26 | 7.25 | 7.03 | 6.51 | 5.98 | 5.72 | 5.78 | 6.03 | 6.21 |
| 2.41 | 8.25 | 7.70 | 6.84 | 6.38 | 6.32 | 6.84 | 7.40 | 7.58 | 7.00 | 5.94 | 5.02 |
| 2.46 | 6.96 | 7.33 | 7.71 | 7.66 | 7.30 | 6.61 | 5.90 | 5.49 | 5.73 | 6.20 | 6.50 |
| 2.51 | 8.22 | 7.59 | 7.01 | 6.79 | 7.07 | 7.54 | 7.96 | 7.60 | 6.64 | 5.56 | 5.10 |
| 2.56 | 8.05 | 8.06 | 7.70 | 7.04 | 6.64 | 6.23 | 6.57 | 6.88 | 6.98 | 6.82 | 6.09 |
| 2.61 | 7.13 | 7.31 | 7.66 | 7.33 | 6.73 | 6.15 | 5.71 | 5.50 | 5.87 | 6.09 | 6.14 |
| 2.66 | 7.54 | 6.99 | 6.72 | 6.78 | 6.95 | 7.08 | 6.97 | 6.46 | 5.65 | 5.07 | 4.82 |
| 2.71 | 7.83 | 8.04 | 7.65 | 7.23 | 6.49 | 6.16 | 6.03 | 6.28 | 6.63 | 6.59 | 6.17 |
| 2.76 | 6.90 | 6.86 | 6.98 | 7.07 | 7.24 | 7.16 | 6.48 | 5.85 | 5.44 | 5.44 | 5.77 |
| 2.81 | 7.50 | 7.15 | 6.90 | 6.51 | 6.37 | 6.63 | 6.91 | 6.83 | 6.58 | 5.79 | 5.29 |
| 2.86 | 7.25 | 7.53 | 7.28 | 6.97 | 6.60 | 6.21 | 6.06 | 6.27 | 6.32 | 6.33 | 5.97 |
| 2.91 | 6.92 | 6.52 | 6.55 | 6.60 | 6.60 | 6.61 | 6.36 | 5.73 | 5.22 | 4.93 | 5.00 |
| 2.96 | 8.01 | 7.83 | 7.43 | 6.94 | 6.64 | 6.48 | 6.63 | 6.71 | 6.70 | 6.22 | 5.66 |
| 3.01 | 6.94 | 7.00 | 7.23 | 7.20 | 7.22 | 6.82 | 6.28 | 5.91 | 5.63 | 5.74 | 5.85 |
| 3.06 | 7.40 | 7.00 | 6.56 | 6.43 | 6.46 | 6.64 | 6.65 | 6.35 | 5.90 | 5.09 | 4.95 |
| 3.11 | 7.52 | 7.36 | 6.98 | 6.58 | 6.33 | 6.11 | 5.95 | 6.17 | 6.03 | 5.86 | 5.43 |
| 3.16 | 6.94 | 6.85 | 6.97 | 6.99 | 6.96 | 6.56 | 6.07 | 5.48 | 5.28 | 5.24 | 5.51 |
| 3.21 | 7.26 | 7.09 | 6.76 | 6.42 | 6.45 | 6.38 | 6.24 | 6.05 | 5.73 | 5.23 | 4.94 |
| 3.26 | 6.95 | 7.07 | 6.93 | 6.81 | 6.44 | 6.04 | 5.65 | 5.71 | 5.83 | 5.85 | 5.68 |
| 3.31 | 7.01 | 6.76 | 6.64 | 6.61 | 6.62 | 6.52 | 6.19 | 5.78 | 5.41 | 5.29 | 5.32 |
| 3.36 | 7.26 | 7.04 | 6.79 | 6.40 | 6.24 | 6.09 | 6.11 | 6.11 | 6.02 | 5.64 | 5.24 |
| 3.41 | 7.20 | 7.35 | 7.35 | 7.16 | 6.83 | 6.37 | 5.96 | 5.80 | 5.96 | 5.95 | 6.05 |
| 3.46 | 7.36 | 7.24 | 6.98 | 6.85 | 6.88 | 6.76 | 6.48 | 6.05 | 5.55 | 5.17 | 5.04 |
| 3.51 | 7.26 | 7.44 | 7.12 | 6.83 | 6.50 | 6.31 | 6.31 | 6.17 | 6.15 | 6.08 | 5.73 |
| 3.56 | 6.71 | 6.65 | 6.67 | 6.62 | 6.49 | 6.09 | 5.75 | 5.39 | 5.19 | 5.18 | 5.36 |
| 3.61 | 6.60 | 6.36 | 6.31 | 6.22 | 5.97 | 5.95 | 5.82 | 5.57 | 5.35 | 5.16 | 4.83 |
| 3.66 | 7.24 | 7.25 | 7.22 | 6.86 | 6.35 | 6.00 | 5.71 | 5.79 | 5.87 | 5.75 | 5.59 |
| 3.71 | 7.12 | 6.82 | 6.66 | 6.65 | 6.72 | 6.61 | 6.44 | 5.95 | 5.55 | 5.13 | 5.20 |
| 3.76 | 7.68 | 7.43 | 7.30 | 7.00 | 6.80 | 6.61 | 6.49 | 6.35 | 6.07 | 5.78 | 5.46 |
| 3.81 | 6.90 | 6.89 | 6.89 | 6.55 | 6.24 | 5.93 | 5.67 | 5.56 | 5.45 | 5.43 | 5.38 |
| 3.86 | 6.70 | 6.46 | 6.47 | 6.41 | 6.39 | 6.15 | 5.92 | 5.65 | 5.27 | 5.06 | 5.11 |
| 3.91 | 7.49 | 7.31 | 7.21 | 6.93 | 6.48 | 6.32 | 6.23 | 6.17 | 6.08 | 5.91 | 5.49 |
| 3.96 | 7.02 | 6.95 | 7.00 | 6.92 | 6.66 | 6.38 | 6.08 | 5.96 | 5.57 | 5.45 | 5.48 |
| 4.01 | 7.19 | 7.03 | 6.77 | 6.45 | 6.39 | 6.35 | 6.12 | 6.07 | 5.77 | 5.34 | 5.13 |
| 4.06 | 7.23 | 7.21 | 7.04 | 6.74 | 6.58 | 6.25 | 6.16 | 5.93 | 5.87 | 5.66 | 5.44 |
| 4.11 | 7.38 | 7.21 | 7.09 | 7.04 | 6.83 | 6.55 | 6.25 | 5.79 | 5.60 | 5.44 | 5.43 |
| 4.16 | 7.31 | 7.00 | 6.72 | 6.47 | 6.27 | 6.22 | 6.12 | 6.01 | 5.76 | 5.33 | 5.09 |
| 4.21 | 8.04 | 8.01 | 7.91 | 7.73 | 7.34 | 7.13 | 6.86 | 6.63 | 6.41 | 6.29 | 6.15 |
| 4.26 | 7.47 | 7.14 | 6.90 | 6.82 | 6.75 | 6.61 | 6.35 | 6.07 | 5.77 | 5.49 | 5.32 |

|       |      |      |      |      |      |      |      |      |      |      |      |
|-------|------|------|------|------|------|------|------|------|------|------|------|
| 4.31  | 6.98 | 6.84 | 6.67 | 6.25 | 6.20 | 6.04 | 5.89 | 5.82 | 5.77 | 5.49 | 5.03 |
| 4.36  | 6.92 | 6.79 | 6.71 | 6.49 | 6.31 | 6.03 | 5.67 | 5.56 | 5.62 | 5.38 | 5.18 |
| 4.41  | 7.10 | 6.98 | 6.80 | 6.53 | 6.49 | 6.28 | 6.10 | 5.98 | 5.58 | 5.25 | 5.09 |
| 4.46  | 7.02 | 6.96 | 6.89 | 6.54 | 6.38 | 6.22 | 6.36 | 6.30 | 5.94 | 5.90 | 5.69 |
| 4.51  | 6.91 | 6.81 | 6.91 | 6.65 | 6.57 | 6.37 | 6.05 | 5.92 | 5.62 | 5.42 | 5.41 |
| 4.56  | 7.07 | 6.86 | 6.73 | 6.51 | 6.43 | 6.20 | 6.03 | 5.79 | 5.57 | 5.33 | 5.03 |
| 4.61  | 7.14 | 6.97 | 6.92 | 6.54 | 6.38 | 6.07 | 6.04 | 5.74 | 5.59 | 5.34 | 5.05 |
| 4.66  | 6.86 | 6.64 | 6.61 | 6.55 | 6.38 | 6.18 | 5.87 | 5.72 | 5.27 | 5.08 | 4.92 |
| 4.71  | 7.17 | 7.04 | 6.78 | 6.46 | 6.22 | 6.16 | 6.00 | 6.01 | 5.80 | 5.51 | 5.22 |
| 4.76  | 7.09 | 7.04 | 7.09 | 6.97 | 6.70 | 6.39 | 6.18 | 6.02 | 5.98 | 5.84 | 5.73 |
| 4.81  | 6.82 | 6.78 | 6.57 | 6.53 | 6.32 | 6.05 | 5.96 | 5.58 | 5.45 | 5.19 | 4.98 |
| 4.86  | 7.12 | 7.05 | 6.81 | 6.43 | 6.26 | 6.01 | 5.91 | 5.77 | 5.59 | 5.32 | 5.08 |
| 4.91  | 6.92 | 6.85 | 6.80 | 6.54 | 6.49 | 6.20 | 5.95 | 5.76 | 5.69 | 5.39 | 5.47 |
| 4.96  | 7.05 | 6.96 | 6.77 | 6.54 | 6.25 | 6.20 | 6.04 | 5.99 | 5.70 | 5.38 | 5.16 |
| 5.01  | 7.06 | 6.91 | 6.79 | 6.54 | 6.30 | 6.11 | 5.84 | 5.73 | 5.31 | 5.46 | 5.10 |
| 5.06  | 6.62 | 6.63 | 6.55 | 6.35 | 6.27 | 6.14 | 5.90 | 5.72 | 5.49 | 5.40 | 5.14 |
| 5.11  | 6.37 | 6.28 | 6.25 | 5.92 | 5.83 | 5.77 | 5.59 | 5.32 | 5.23 | 4.84 | 4.71 |
| 5.16  | 6.49 | 6.59 | 6.55 | 6.16 | 5.86 | 5.72 | 5.51 | 5.31 | 5.24 | 5.08 | 4.87 |
| 5.21  | 6.79 | 6.64 | 6.55 | 6.37 | 6.27 | 6.15 | 5.90 | 5.81 | 5.56 | 5.28 | 5.11 |
| 5.26  | 7.11 | 6.98 | 6.77 | 6.65 | 6.33 | 6.19 | 5.99 | 5.82 | 5.60 | 5.40 | 5.15 |
| 5.31  | 6.83 | 6.73 | 6.64 | 6.45 | 6.21 | 6.06 | 5.74 | 5.50 | 5.42 | 5.28 | 5.09 |
| 5.38  | 6.62 | 6.56 | 6.49 | 6.25 | 6.13 | 5.90 | 5.76 | 5.45 | 5.34 | 5.24 | 5.08 |
| 5.45  | 6.92 | 6.80 | 6.78 | 6.49 | 6.37 | 6.11 | 5.91 | 5.77 | 5.61 | 5.44 | 5.35 |
| 5.53  | 6.62 | 6.62 | 6.48 | 6.37 | 6.09 | 5.75 | 5.61 | 5.52 | 5.21 | 5.04 | 4.76 |
| 5.61  | 7.02 | 6.83 | 6.71 | 6.44 | 6.27 | 6.21 | 5.94 | 5.73 | 5.58 | 5.27 | 5.10 |
| 5.70  | 6.78 | 6.68 | 6.52 | 6.31 | 6.05 | 5.85 | 5.58 | 5.46 | 5.16 | 5.15 | 4.89 |
| 5.80  | 6.91 | 6.84 | 6.57 | 6.41 | 6.33 | 6.01 | 5.88 | 5.72 | 5.37 | 5.22 | 4.97 |
| 5.90  | 6.31 | 6.38 | 6.22 | 5.94 | 5.82 | 5.78 | 5.50 | 5.32 | 5.13 | 4.98 | 4.78 |
| 6.01  | 6.96 | 6.94 | 6.75 | 6.52 | 6.31 | 6.12 | 5.82 | 5.73 | 5.45 | 5.17 | 5.07 |
| 6.13  | 6.84 | 6.85 | 6.60 | 6.36 | 6.19 | 5.92 | 5.64 | 5.56 | 5.31 | 5.03 | 4.85 |
| 6.25  | 6.51 | 6.39 | 6.39 | 6.13 | 5.74 | 5.58 | 5.39 | 5.26 | 4.92 | 4.90 | 4.60 |
| 6.39  | 6.50 | 6.47 | 6.33 | 6.06 | 5.83 | 5.69 | 5.49 | 5.41 | 5.15 | 4.86 | 4.72 |
| 6.53  | 6.52 | 6.50 | 6.32 | 6.21 | 5.96 | 5.74 | 5.59 | 5.43 | 5.29 | 5.02 | 4.80 |
| 6.69  | 6.91 | 6.76 | 6.65 | 6.42 | 6.23 | 5.96 | 5.73 | 5.67 | 5.30 | 5.19 | 4.98 |
| 6.85  | 6.70 | 6.40 | 6.32 | 6.12 | 5.96 | 5.73 | 5.59 | 5.34 | 5.18 | 4.94 | 4.72 |
| 7.03  | 6.39 | 6.54 | 6.26 | 6.06 | 5.89 | 5.64 | 5.47 | 5.38 | 4.97 | 4.83 | 4.58 |
| 7.21  | 6.29 | 6.15 | 6.11 | 5.83 | 5.65 | 5.58 | 5.33 | 5.16 | 5.01 | 4.79 | 4.60 |
| 7.41  | 6.57 | 6.49 | 6.31 | 6.05 | 5.85 | 5.57 | 5.50 | 5.23 | 5.08 | 4.85 | 4.61 |
| 7.63  | 6.83 | 6.76 | 6.55 | 6.36 | 6.16 | 5.98 | 5.77 | 5.65 | 5.47 | 5.19 | 4.97 |
| 7.86  | 6.57 | 6.49 | 6.32 | 6.04 | 5.85 | 5.59 | 5.41 | 5.19 | 5.02 | 4.82 | 4.68 |
| 8.10  | 6.23 | 6.24 | 5.91 | 5.85 | 5.65 | 5.36 | 5.24 | 5.02 | 4.89 | 4.69 | 4.62 |
| 8.36  | 6.06 | 5.91 | 5.90 | 5.65 | 5.60 | 5.26 | 4.95 | 4.94 | 4.81 | 4.64 | 4.33 |
| 8.64  | 6.55 | 6.41 | 6.41 | 6.12 | 5.99 | 5.68 | 5.47 | 5.31 | 5.03 | 4.75 | 4.59 |
| 8.94  | 6.86 | 6.79 | 6.68 | 6.44 | 6.15 | 5.89 | 5.75 | 5.54 | 5.36 | 5.07 | 4.95 |
| 9.26  | 7.00 | 6.74 | 6.76 | 6.49 | 6.39 | 6.15 | 5.80 | 5.66 | 5.59 | 5.28 | 4.98 |
| 9.60  | 6.25 | 6.23 | 5.97 | 5.74 | 5.46 | 5.31 | 5.09 | 4.91 | 4.73 | 4.47 | 4.33 |
| 9.97  | 5.80 | 5.58 | 5.54 | 5.34 | 5.14 | 5.03 | 4.82 | 4.75 | 4.58 | 4.35 | 4.30 |
| 10.36 | 6.46 | 6.30 | 6.12 | 5.77 | 5.59 | 5.43 | 5.22 | 5.02 | 4.77 | 4.52 | 4.37 |
| 10.77 | 6.47 | 6.52 | 6.24 | 6.16 | 5.83 | 5.62 | 5.42 | 5.28 | 4.97 | 4.89 | 4.81 |
| 11.22 | 6.37 | 6.34 | 6.20 | 5.98 | 5.79 | 5.60 | 5.33 | 5.23 | 4.91 | 4.88 | 4.60 |

|        |      |      |      |      |      |      |      |      |      |      |      |
|--------|------|------|------|------|------|------|------|------|------|------|------|
| 11.70  | 6.44 | 6.26 | 6.09 | 5.92 | 5.62 | 5.51 | 5.24 | 5.00 | 4.75 | 4.66 | 4.34 |
| 12.21  | 5.92 | 5.76 | 5.49 | 5.35 | 5.20 | 4.93 | 4.68 | 4.49 | 4.32 | 4.03 | 3.87 |
| 12.75  | 6.03 | 5.88 | 5.86 | 5.60 | 5.50 | 5.13 | 4.88 | 4.90 | 4.63 | 4.43 | 4.30 |
| 13.33  | 6.20 | 6.07 | 5.99 | 5.73 | 5.47 | 5.32 | 5.03 | 4.97 | 4.75 | 4.54 | 4.39 |
| 13.95  | 6.17 | 6.03 | 5.88 | 5.75 | 5.55 | 5.23 | 5.03 | 4.87 | 4.71 | 4.39 | 4.35 |
| 14.62  | 5.85 | 5.83 | 5.56 | 5.45 | 5.21 | 5.00 | 4.93 | 4.68 | 4.53 | 4.36 | 4.01 |
| 15.33  | 6.00 | 5.79 | 5.68 | 5.44 | 5.25 | 5.06 | 4.86 | 4.62 | 4.50 | 4.31 | 4.06 |
| 16.09  | 5.82 | 5.60 | 5.58 | 5.29 | 5.26 | 4.84 | 4.63 | 4.54 | 4.25 | 4.17 | 3.99 |
| 16.90  | 6.25 | 6.03 | 6.01 | 5.73 | 5.56 | 5.36 | 5.23 | 4.93 | 4.74 | 4.50 | 4.34 |
| 17.77  | 6.02 | 5.83 | 5.70 | 5.50 | 5.31 | 5.08 | 4.83 | 4.63 | 4.56 | 4.28 | 4.14 |
| 18.70  | 6.20 | 6.09 | 5.90 | 5.73 | 5.56 | 5.30 | 5.09 | 4.96 | 4.78 | 4.47 | 4.33 |
| 19.69  | 5.68 | 5.56 | 5.39 | 5.09 | 5.02 | 4.87 | 4.62 | 4.47 | 4.34 | 4.13 | 3.98 |
| 20.75  | 5.57 | 5.45 | 5.32 | 5.18 | 5.01 | 4.81 | 4.57 | 4.30 | 4.24 | 3.91 | 3.83 |
| 21.89  | 5.85 | 5.72 | 5.62 | 5.42 | 5.22 | 5.11 | 4.99 | 4.91 | 4.58 | 4.41 | 4.15 |
| 23.10  | 6.29 | 6.34 | 6.22 | 5.98 | 5.68 | 5.48 | 5.26 | 5.12 | 4.77 | 4.62 | 4.43 |
| 24.39  | 5.92 | 5.60 | 5.49 | 5.30 | 5.11 | 4.92 | 4.59 | 4.54 | 4.31 | 4.15 | 3.96 |
| 25.78  | 5.68 | 5.37 | 5.44 | 5.24 | 5.06 | 4.88 | 4.70 | 4.42 | 4.37 | 4.07 | 4.06 |
| 27.26  | 5.91 | 5.84 | 5.66 | 5.37 | 5.15 | 5.00 | 4.66 | 4.52 | 4.31 | 3.97 | 3.91 |
| 28.84  | 5.37 | 5.32 | 5.30 | 5.04 | 4.82 | 4.63 | 4.34 | 4.25 | 4.06 | 3.82 | 3.72 |
| 30.53  | 5.95 | 5.76 | 5.69 | 5.42 | 5.30 | 4.95 | 4.77 | 4.61 | 4.40 | 4.11 | 3.95 |
| 32.34  | 5.45 | 5.28 | 5.22 | 4.94 | 4.70 | 4.49 | 4.26 | 4.08 | 4.00 | 3.87 | 3.65 |
| 34.27  | 5.36 | 5.40 | 5.17 | 4.98 | 4.73 | 4.52 | 4.33 | 4.13 | 4.01 | 3.80 | 3.59 |
| 36.34  | 5.72 | 5.63 | 5.50 | 5.15 | 5.03 | 4.80 | 4.43 | 4.41 | 4.14 | 3.96 | 3.66 |
| 38.55  | 5.47 | 5.29 | 5.19 | 4.86 | 4.61 | 4.40 | 4.23 | 3.94 | 3.73 | 3.53 | 3.19 |
| 40.91  | 5.66 | 5.58 | 5.24 | 5.01 | 4.69 | 4.63 | 4.41 | 4.19 | 3.98 | 3.82 | 3.62 |
| 43.43  | 4.95 | 4.85 | 4.68 | 4.51 | 4.40 | 4.08 | 3.94 | 3.87 | 3.64 | 3.50 | 3.30 |
| 46.13  | 5.66 | 5.65 | 5.45 | 5.14 | 4.93 | 4.76 | 4.55 | 4.31 | 4.04 | 3.84 | 3.63 |
| 49.01  | 5.54 | 5.45 | 5.23 | 5.10 | 4.77 | 4.67 | 4.32 | 4.27 | 3.99 | 3.71 | 3.66 |
| 52.09  | 5.38 | 5.23 | 5.09 | 4.90 | 4.84 | 4.54 | 4.42 | 4.28 | 4.07 | 3.95 | 3.79 |
| 55.39  | 5.02 | 4.85 | 4.69 | 4.57 | 4.36 | 4.08 | 3.92 | 3.66 | 3.54 | 3.34 | 3.12 |
| 58.91  | 5.09 | 5.00 | 4.70 | 4.50 | 4.21 | 4.09 | 3.95 | 3.76 | 3.56 | 3.50 | 3.09 |
| 62.68  | 4.92 | 4.68 | 4.72 | 4.49 | 4.45 | 4.27 | 3.94 | 3.88 | 3.75 | 3.50 | 3.39 |
| 66.70  | 5.24 | 5.33 | 4.93 | 4.80 | 4.60 | 4.30 | 4.05 | 3.91 | 3.74 | 3.46 | 3.30 |
| 71.00  | 5.40 | 5.25 | 5.13 | 4.79 | 4.54 | 4.42 | 4.12 | 4.00 | 3.75 | 3.60 | 3.43 |
| 75.60  | 5.37 | 5.31 | 5.10 | 4.93 | 4.72 | 4.43 | 4.31 | 4.09 | 3.86 | 3.65 | 3.53 |
| 80.51  | 4.94 | 4.88 | 4.70 | 4.39 | 4.21 | 3.99 | 3.78 | 3.45 | 3.33 | 3.11 | 2.76 |
| 85.77  | 4.95 | 4.83 | 4.78 | 4.54 | 4.34 | 4.28 | 4.13 | 3.83 | 3.70 | 3.60 | 3.46 |
| 91.38  | 4.96 | 4.88 | 4.66 | 4.50 | 4.29 | 4.01 | 3.88 | 3.71 | 3.41 | 3.30 | 3.12 |
| 97.39  | 4.95 | 4.92 | 4.74 | 4.43 | 4.36 | 4.23 | 3.88 | 3.73 | 3.61 | 3.33 | 3.17 |
| 103.80 | 5.56 | 5.46 | 5.18 | 4.95 | 4.66 | 4.43 | 4.22 | 4.05 | 3.74 | 3.58 | 3.35 |
| 110.66 | 5.02 | 4.90 | 4.75 | 4.44 | 4.27 | 4.02 | 3.85 | 3.61 | 3.45 | 3.15 | 2.96 |
| 117.99 | 5.18 | 5.08 | 4.94 | 4.70 | 4.47 | 4.28 | 3.95 | 3.81 | 3.63 | 3.37 | 3.16 |
| 125.83 | 4.95 | 4.80 | 4.73 | 4.37 | 4.22 | 3.92 | 3.73 | 3.54 | 3.44 | 3.18 | 3.00 |
| 134.21 | 5.09 | 4.76 | 4.72 | 4.31 | 4.17 | 4.00 | 3.78 | 3.49 | 3.18 | 3.09 | 2.90 |
| 143.17 | 4.91 | 4.89 | 4.72 | 4.62 | 4.38 | 4.34 | 4.02 | 3.87 | 3.70 | 3.33 | 3.09 |
| 152.74 | 4.76 | 4.63 | 4.40 | 4.09 | 3.88 | 3.72 | 3.32 | 3.38 | 2.98 | 2.88 | 2.73 |
| 162.97 | 4.76 | 4.62 | 4.46 | 4.21 | 3.97 | 3.84 | 3.48 | 3.33 | 3.18 | 3.06 | 2.66 |
| 173.91 | 4.59 | 4.46 | 4.35 | 4.11 | 3.81 | 3.73 | 3.52 | 3.20 | 2.99 | 2.85 | 2.70 |
| 185.60 | 4.57 | 4.30 | 4.26 | 4.03 | 3.74 | 3.59 | 3.36 | 3.13 | 3.05 | 2.72 | 2.57 |
| 198.10 | 4.73 | 4.64 | 4.46 | 4.23 | 4.02 | 3.75 | 3.56 | 3.28 | 3.25 | 2.94 | 2.69 |



|         |      |      |      |      |      |      |      |      |      |      |      |
|---------|------|------|------|------|------|------|------|------|------|------|------|
| 211.46  | 5.19 | 4.91 | 4.64 | 4.39 | 4.07 | 3.97 | 3.71 | 3.39 | 3.12 | 3.04 | 2.81 |
| 225.75  | 4.53 | 4.41 | 4.33 | 4.05 | 3.88 | 3.65 | 3.45 | 3.25 | 3.07 | 2.93 | 2.68 |
| 241.01  | 4.47 | 4.31 | 4.21 | 4.09 | 3.77 | 3.52 | 3.31 | 3.21 | 2.94 | 2.70 | 2.53 |
| 257.33  | 4.64 | 4.43 | 4.28 | 4.04 | 3.79 | 3.61 | 3.34 | 3.14 | 2.92 | 2.64 | 2.53 |
| 274.77  | 4.53 | 4.26 | 4.18 | 3.84 | 3.70 | 3.49 | 3.10 | 3.06 | 2.86 | 2.68 | 2.43 |
| 293.42  | 4.63 | 4.45 | 4.27 | 3.95 | 3.81 | 3.51 | 3.30 | 3.05 | 2.76 | 2.61 | 2.38 |
| 313.35  | 4.71 | 4.59 | 4.43 | 4.13 | 3.92 | 3.61 | 3.29 | 3.10 | 2.81 | 2.58 | 2.31 |
| 334.66  | 4.54 | 4.21 | 4.04 | 4.03 | 3.74 | 3.47 | 3.26 | 3.04 | 2.89 | 2.69 | 2.49 |
| 357.43  | 4.14 | 3.98 | 3.95 | 3.71 | 3.58 | 3.46 | 3.17 | 3.01 | 2.80 | 2.56 | 2.38 |
| 381.78  | 4.25 | 4.11 | 3.80 | 3.59 | 3.40 | 3.26 | 2.92 | 2.66 | 2.49 | 2.24 | 2.08 |
| 407.80  | 4.01 | 3.82 | 3.71 | 3.50 | 3.26 | 3.18 | 2.82 | 2.76 | 2.53 | 2.31 | 2.26 |
| 435.62  | 4.58 | 4.30 | 4.31 | 3.94 | 3.64 | 3.49 | 3.27 | 3.07 | 2.79 | 2.56 | 2.45 |
| 465.35  | 4.20 | 4.00 | 3.85 | 3.55 | 3.34 | 2.99 | 2.87 | 2.60 | 2.33 | 2.22 | 2.02 |
| 497.14  | 4.11 | 3.90 | 3.80 | 3.51 | 3.28 | 2.90 | 2.73 | 2.59 | 2.42 | 2.15 | 1.99 |
| 531.11  | 3.92 | 3.67 | 3.55 | 3.27 | 3.21 | 2.85 | 2.80 | 2.55 | 2.40 | 2.09 | 1.94 |
| 567.43  | 3.98 | 3.90 | 3.64 | 3.38 | 3.23 | 3.02 | 2.72 | 2.55 | 2.35 | 2.13 | 1.92 |
| 606.26  | 3.86 | 3.71 | 3.47 | 3.26 | 3.01 | 2.81 | 2.55 | 2.38 | 2.22 | 1.94 | 1.82 |
| 647.76  | 4.25 | 3.99 | 3.83 | 3.53 | 3.23 | 2.95 | 2.70 | 2.44 | 2.24 | 1.95 | 1.81 |
| 692.12  | 4.11 | 3.99 | 3.86 | 3.46 | 3.36 | 3.04 | 2.81 | 2.57 | 2.40 | 2.04 | 1.86 |
| 739.53  | 4.24 | 4.03 | 3.71 | 3.57 | 3.22 | 2.91 | 2.68 | 2.59 | 2.38 | 2.09 | 1.90 |
| 790.22  | 3.65 | 3.56 | 3.45 | 3.15 | 3.00 | 2.76 | 2.59 | 2.45 | 2.30 | 2.07 | 1.89 |
| 844.40  | 3.79 | 3.66 | 3.46 | 3.32 | 3.22 | 2.93 | 2.66 | 2.50 | 2.32 | 2.10 | 1.99 |
| 902.32  | 4.03 | 3.89 | 3.77 | 3.41 | 3.27 | 2.90 | 2.76 | 2.57 | 2.38 | 1.97 | 1.88 |
| 964.23  | 3.61 | 3.49 | 3.29 | 2.98 | 2.68 | 2.60 | 2.51 | 2.31 | 2.08 | 1.94 | 1.69 |
| 1030.41 | 3.82 | 3.55 | 3.30 | 3.12 | 2.81 | 2.59 | 2.41 | 2.05 | 1.89 | 1.67 | 1.57 |
| 1101.15 | 4.19 | 4.04 | 3.67 | 3.36 | 3.06 | 2.91 | 2.70 | 2.40 | 2.15 | 1.96 | 1.73 |
| 1176.77 | 3.89 | 3.78 | 3.59 | 3.49 | 3.16 | 2.89 | 2.53 | 2.36 | 2.08 | 1.84 | 1.64 |
| 1257.60 | 3.87 | 3.67 | 3.39 | 3.14 | 2.81 | 2.72 | 2.41 | 2.18 | 1.89 | 1.71 | 1.68 |
| 1344.00 | 4.05 | 3.92 | 3.67 | 3.37 | 3.16 | 2.96 | 2.65 | 2.47 | 2.23 | 1.83 | 1.62 |
| 1436.36 | 4.00 | 3.76 | 3.53 | 3.21 | 2.99 | 2.60 | 2.40 | 2.11 | 2.01 | 1.67 | 1.53 |
| 1535.09 | 3.66 | 3.67 | 3.35 | 3.16 | 2.90 | 2.53 | 2.31 | 2.09 | 1.82 | 1.62 | 1.40 |
| 1640.63 | 3.74 | 3.55 | 3.30 | 3.14 | 2.89 | 2.67 | 2.44 | 2.13 | 2.02 | 1.85 | 1.60 |
| 1753.44 | 3.88 | 3.61 | 3.39 | 3.10 | 2.87 | 2.54 | 2.33 | 2.08 | 1.64 | 1.60 | 1.42 |
| 1874.02 | 3.13 | 3.04 | 2.83 | 2.53 | 2.46 | 2.19 | 2.13 | 1.97 | 1.73 | 1.63 | 1.41 |
| 2002.92 | 3.80 | 3.61 | 3.30 | 2.99 | 2.78 | 2.49 | 2.19 | 2.06 | 1.69 | 1.54 | 1.26 |
| 2140.71 | 3.85 | 3.50 | 3.30 | 3.12 | 2.78 | 2.61 | 2.22 | 1.99 | 1.67 | 1.47 | 1.26 |
| 2288.00 | 3.44 | 3.31 | 3.02 | 2.72 | 2.43 | 2.20 | 2.01 | 1.78 | 1.55 | 1.40 | 1.12 |
| 2445.44 | 3.41 | 3.16 | 3.12 | 2.80 | 2.56 | 2.30 | 2.11 | 1.87 | 1.71 | 1.50 | 1.36 |
| 2613.73 | 3.91 | 3.67 | 3.37 | 3.22 | 2.94 | 2.61 | 2.19 | 2.17 | 1.82 | 1.47 | 1.46 |
| 2793.63 | 3.33 | 3.21 | 3.10 | 2.55 | 2.47 | 2.08 | 1.89 | 1.75 | 1.41 | 1.27 | 1.00 |
| 2985.93 | 3.40 | 3.23 | 2.99 | 2.66 | 2.52 | 2.22 | 1.97 | 1.73 | 1.35 | 1.07 | 0.97 |
| 3191.49 | 3.55 | 3.52 | 3.32 | 3.00 | 2.75 | 2.49 | 2.29 | 2.09 | 1.92 | 1.66 | 1.41 |
| 3411.21 | 3.76 | 3.59 | 3.46 | 3.12 | 2.97 | 2.66 | 2.34 | 2.03 | 1.89 | 1.56 | 1.38 |
| 3646.09 | 3.83 | 3.77 | 3.69 | 3.46 | 3.30 | 3.05 | 2.93 | 2.72 | 2.46 | 2.33 | 2.13 |
| 3897.16 | 4.32 | 4.18 | 4.03 | 3.69 | 3.39 | 3.11 | 2.88 | 2.67 | 2.33 | 1.99 | 1.82 |

| Wavelength<br>h<br>(nm) | 443.7<br>4 | 445.1<br>7 | 446.5<br>9 | 448.0<br>1 | 449.4<br>4 | 450.8<br>6 | 452.29 | 453.71 | 455.13 | 456.56 | 457.98 |       |
|-------------------------|------------|------------|------------|------------|------------|------------|--------|--------|--------|--------|--------|-------|
| Time<br>(ps)            | -2.74      | 0.24       | 0.25       | 0.29       | 0.21       | 0.17       | 0.03   | 0.13   | 0.10   | 0.08   | -0.06  | -0.05 |

|       |            |            |            |            |            |            |        |        |        |        |        |
|-------|------------|------------|------------|------------|------------|------------|--------|--------|--------|--------|--------|
| -2.24 | -0.20      | -0.12      | -0.18      | -0.16      | -0.05      | -0.09      | -0.07  | -0.01  | 0.06   | -0.02  | -0.01  |
| -1.74 | -0.19      | -0.20      | -0.14      | -0.13      | -0.10      | 0.06       | 0.12   | 0.02   | -0.01  | 0.10   | 0.11   |
| -1.24 | 0.06       | -0.01      | 0.04       | -0.01      | 0.03       | -0.02      | -0.04  | 0.05   | -0.04  | 0.06   | -0.04  |
| -0.74 | 0.16       | 0.06       | 0.12       | 0.11       | 0.06       | 0.04       | -0.13  | -0.01  | -0.04  | -0.12  | -0.17  |
| -0.24 | 0.03       | -0.06      | -0.07      | 0.01       | -0.05      | 0.06       | 0.02   | 0.02   | -0.01  | -0.02  | 0.08   |
| -0.14 | -0.01      | 0.12       | -0.05      | 0.00       | -0.10      | -0.02      | -0.14  | -0.22  | -0.09  | -0.07  | -0.10  |
| -0.04 | -0.09      | -0.04      | -0.02      | -0.02      | 0.04       | -0.07      | 0.09   | 0.04   | 0.05   | 0.14   | 0.17   |
| 0.06  | -0.06      | -0.09      | -0.08      | -0.13      | -0.09      | -0.10      | -0.06  | -0.06  | -0.17  | -0.07  | -0.15  |
| 0.16  | -0.19      | -0.20      | -0.18      | -0.21      | -0.19      | -0.17      | -0.19  | -0.14  | -0.04  | -0.13  | -0.04  |
| 0.26  | -0.13      | -0.17      | -0.14      | -0.25      | -0.22      | -0.18      | -0.14  | -0.12  | -0.02  | -0.18  | -0.16  |
| 0.31  | -0.13      | -0.08      | -0.04      | -0.05      | 0.04       | 0.08       | -0.01  | 0.00   | 0.14   | 0.05   | 0.00   |
| 0.36  | -0.17      | -0.09      | -0.17      | -0.07      | -0.06      | -0.11      | 0.03   | -0.06  | -0.08  | 0.02   | -0.02  |
| 0.41  | 0.08       | 0.03       | 0.05       | -0.04      | 0.07       | 0.07       | 0.05   | -0.04  | -0.07  | -0.10  | 0.04   |
| 0.46  | -0.10      | -0.18      | -0.05      | -0.08      | -0.13      | -0.16      | -0.08  | -0.07  | -0.04  | -0.15  | -0.12  |
| 0.51  | -0.07      | -0.11      | -0.07      | -0.13      | -0.08      | -0.05      | -0.08  | 0.13   | 0.08   | -0.01  | -0.03  |
| 0.56  | -0.16      | -0.12      | -0.09      | -0.18      | -0.08      | -0.19      | -0.10  | -0.12  | 0.04   | -0.07  | 0.02   |
| 0.61  | -0.02      | -0.04      | -0.03      | -0.09      | -0.07      | -0.12      | 0.01   | -0.09  | -0.05  | -0.08  | -0.04  |
| 0.66  | -0.11      | -0.16      | -0.07      | -0.16      | -0.12      | -0.07      | -0.12  | -0.07  | -0.13  | -0.20  | -0.16  |
| 0.71  | 0.02       | -0.09      | -0.04      | -0.04      | -0.07      | -0.12      | -0.05  | -0.04  | -0.01  | -0.10  | -0.03  |
| 0.76  | -0.27      | -0.34      | -0.22      | -0.25      | -0.23      | -0.19      | -0.19  | -0.19  | -0.13  | -0.11  | -0.05  |
| 0.81  | 0.12       | 0.06       | 0.10       | 0.10       | 0.10       | 0.11       | 0.09   | 0.04   | 0.07   | -0.01  | 0.07   |
| 0.86  | 0.19       | 0.19       | 0.15       | 0.25       | 0.15       | 0.18       | 0.12   | 0.04   | 0.08   | 0.09   | 0.03   |
| 0.91  | -0.23      | -0.21      | -0.18      | -0.04      | -0.14      | 0.02       | -0.14  | -0.07  | -0.10  | -0.13  | -0.16  |
| 0.96  | -0.15      | -0.23      | -0.01      | -0.10      | -0.12      | 0.04       | -0.13  | -0.04  | 0.16   | -0.11  | -0.08  |
| 1.01  | 3.15       | -0.38      | -2.68      | -2.44      | -1.15      | -0.40      | -0.43  | -0.58  | -0.28  | 0.04   | -0.09  |
| 1.06  | -38.56     | -65.81     | -82.69     | -89.32     | -86.41     | -75.47     | -58.81 | -39.75 | -21.83 | -7.98  | 0.01   |
| 1.11  | 562.5<br>1 | 534.3<br>4 | 492.1<br>2 | 438.9<br>1 | 377.4<br>9 | 314.7<br>6 | 253.04 | 196.26 | 144.35 | 97.92  | 56.33  |
| 1.16  | -61.91     | 11.47      | 94.45      | 182.3<br>4 | 267.4<br>3 | 345.7<br>9 | 410.84 | 459.54 | 487.03 | 493.90 | 484.04 |
| 1.21  | 12.69      | 24.18      | 32.29      | 23.20      | -8.99      | -57.21     | 107.21 | 145.38 | 163.05 | 157.22 | 129.13 |
| 1.26  | 10.80      | 9.17       | 6.69       | 3.85       | 2.03       | 2.53       | 6.08   | 12.86  | 19.82  | 23.79  | 21.89  |
| 1.31  | 5.60       | 7.53       | 10.39      | 12.59      | 13.08      | 12.03      | 10.14  | 8.72   | 8.04   | 8.58   | 9.82   |
| 1.36  | 8.58       | 6.95       | 6.67       | 7.85       | 9.98       | 11.58      | 11.41  | 9.52   | 6.28   | 3.15   | 1.46   |
| 1.41  | 11.75      | 12.08      | 10.35      | 7.35       | 4.68       | 3.26       | 3.85   | 5.96   | 8.47   | 9.88   | 9.66   |
| 1.46  | 4.56       | 4.96       | 7.00       | 9.14       | 9.92       | 9.01       | 6.52   | 3.92   | 2.58   | 3.27   | 5.60   |
| 1.51  | 9.39       | 7.71       | 5.58       | 4.13       | 4.21       | 5.94       | 8.16   | 9.86   | 10.04  | 8.57   | 6.18   |
| 1.56  | 8.78       | 10.42      | 10.40      | 8.53       | 5.83       | 3.97       | 3.64   | 4.91   | 6.90   | 8.75   | 9.01   |
| 1.61  | 4.93       | 5.49       | 7.17       | 8.60       | 9.08       | 7.98       | 5.69   | 3.50   | 2.18   | 2.39   | 4.03   |
| 1.66  | 9.08       | 7.25       | 5.12       | 3.86       | 4.04       | 5.24       | 7.15   | 8.44   | 8.41   | 7.02   | 5.19   |
| 1.71  | 4.77       | 6.06       | 7.48       | 8.17       | 7.72       | 6.02       | 4.49   | 3.34   | 3.74   | 4.96   | 6.59   |
| 1.76  | 6.29       | 4.97       | 4.64       | 5.45       | 7.07       | 8.43       | 8.70   | 7.86   | 5.82   | 3.73   | 2.33   |
| 1.81  | 8.50       | 8.21       | 6.93       | 5.19       | 3.91       | 3.63       | 4.33   | 5.35   | 6.32   | 6.35   | 5.41   |
| 1.86  | 5.33       | 6.20       | 6.84       | 6.88       | 5.94       | 4.46       | 3.22   | 2.72   | 3.37   | 4.60   | 5.96   |
| 1.91  | 6.22       | 4.70       | 3.65       | 3.67       | 4.78       | 6.10       | 7.11   | 7.19   | 6.11   | 4.27   | 2.69   |
| 1.96  | 6.72       | 7.62       | 7.58       | 6.58       | 5.11       | 3.82       | 3.43   | 3.97   | 5.08   | 5.97   | 6.15   |
| 2.01  | 4.89       | 4.59       | 5.15       | 6.38       | 7.36       | 7.32       | 6.16   | 4.27   | 2.59   | 1.77   | 2.36   |
| 2.06  | 7.10       | 6.20       | 4.89       | 3.84       | 3.33       | 3.96       | 4.88   | 5.81   | 6.18   | 5.71   | 4.59   |
| 2.11  | 5.77       | 6.27       | 6.43       | 5.89       | 4.88       | 3.87       | 3.33   | 3.54   | 4.23   | 4.94   | 5.29   |
| 2.16  | 5.05       | 4.15       | 4.25       | 4.81       | 5.81       | 6.42       | 6.10   | 5.23   | 3.86   | 2.62   | 1.99   |
| 2.21  | 7.53       | 7.23       | 6.26       | 4.80       | 3.83       | 3.63       | 4.03   | 4.99   | 5.92   | 5.91   | 5.23   |

|      |      |      |      |      |      |      |      |      |      |      |      |
|------|------|------|------|------|------|------|------|------|------|------|------|
| 2.26 | 4.73 | 5.19 | 5.96 | 6.55 | 6.48 | 5.93 | 4.55 | 3.51 | 3.06 | 3.33 | 4.20 |
| 2.31 | 6.23 | 5.34 | 4.44 | 4.15 | 4.49 | 5.10 | 5.58 | 5.67 | 5.09 | 4.02 | 2.87 |
| 2.36 | 6.28 | 5.92 | 5.20 | 4.58 | 4.04 | 4.01 | 4.23 | 4.51 | 4.61 | 4.38 | 3.79 |
| 2.41 | 4.55 | 4.64 | 5.39 | 6.04 | 6.09 | 5.43 | 4.39 | 3.26 | 2.63 | 2.81 | 3.41 |
| 2.46 | 6.32 | 5.63 | 4.74 | 3.90 | 3.72 | 3.98 | 4.58 | 5.16 | 5.22 | 4.66 | 3.66 |
| 2.51 | 5.11 | 5.82 | 6.67 | 6.84 | 6.45 | 5.17 | 3.87 | 3.08 | 3.12 | 3.71 | 4.52 |
| 2.56 | 5.32 | 4.78 | 4.55 | 4.83 | 5.27 | 5.51 | 5.25 | 4.51 | 3.60 | 2.95 | 2.72 |
| 2.61 | 5.58 | 5.06 | 4.26 | 3.71 | 3.91 | 4.18 | 4.63 | 4.80 | 4.58 | 3.93 | 3.10 |
| 2.66 | 4.98 | 5.36 | 5.69 | 5.56 | 4.99 | 4.23 | 3.38 | 3.21 | 3.26 | 3.75 | 4.16 |
| 2.71 | 5.30 | 4.52 | 4.15 | 4.29 | 4.69 | 5.04 | 5.09 | 4.72 | 3.93 | 3.04 | 2.42 |
| 2.76 | 6.08 | 6.11 | 5.72 | 5.07 | 4.30 | 3.81 | 3.67 | 4.09 | 4.52 | 4.83 | 4.53 |
| 2.81 | 4.94 | 4.95 | 5.37 | 5.47 | 5.38 | 4.94 | 4.20 | 3.65 | 3.16 | 3.01 | 3.31 |
| 2.86 | 5.49 | 4.87 | 4.58 | 4.40 | 4.55 | 4.82 | 4.90 | 4.65 | 4.13 | 3.33 | 2.75 |
| 2.91 | 5.30 | 5.50 | 5.43 | 5.02 | 4.35 | 3.69 | 3.35 | 3.37 | 3.63 | 4.05 | 4.20 |
| 2.96 | 5.02 | 4.77 | 4.78 | 5.25 | 5.12 | 5.22 | 4.79 | 4.01 | 3.31 | 3.07 | 2.93 |
| 3.01 | 5.97 | 5.77 | 5.21 | 4.53 | 4.15 | 3.96 | 3.98 | 4.19 | 4.46 | 4.37 | 3.98 |
| 3.06 | 4.79 | 4.90 | 5.33 | 5.21 | 4.97 | 4.34 | 3.68 | 3.28 | 3.21 | 3.41 | 3.74 |
| 3.11 | 4.99 | 4.60 | 4.22 | 4.40 | 4.60 | 4.52 | 4.32 | 3.90 | 3.33 | 2.93 | 2.64 |
| 3.16 | 5.50 | 5.31 | 4.89 | 4.31 | 3.79 | 3.55 | 3.50 | 3.74 | 3.98 | 3.95 | 3.56 |
| 3.21 | 4.76 | 4.82 | 5.03 | 4.89 | 4.62 | 4.24 | 3.79 | 3.42 | 3.47 | 3.28 | 3.37 |
| 3.26 | 5.44 | 4.81 | 4.43 | 4.26 | 4.33 | 4.42 | 4.57 | 4.54 | 4.16 | 3.66 | 3.18 |
| 3.31 | 5.31 | 5.42 | 5.16 | 4.85 | 4.32 | 3.95 | 3.89 | 3.73 | 3.90 | 4.00 | 3.91 |
| 3.36 | 5.01 | 4.81 | 4.88 | 4.95 | 4.92 | 4.68 | 4.17 | 3.80 | 3.45 | 3.26 | 3.38 |
| 3.41 | 5.66 | 5.23 | 4.63 | 4.36 | 4.11 | 4.33 | 4.45 | 4.40 | 4.34 | 3.84 | 3.17 |
| 3.46 | 5.08 | 5.18 | 5.23 | 4.85 | 4.39 | 3.95 | 3.60 | 3.33 | 3.47 | 3.60 | 3.73 |
| 3.51 | 5.34 | 4.92 | 4.66 | 4.66 | 4.68 | 4.74 | 4.60 | 4.32 | 3.82 | 3.32 | 3.09 |
| 3.56 | 5.39 | 5.14 | 4.72 | 4.18 | 3.66 | 3.61 | 3.67 | 3.89 | 3.86 | 3.85 | 3.60 |
| 3.61 | 4.83 | 4.86 | 4.82 | 4.65 | 4.37 | 4.13 | 3.82 | 3.73 | 3.38 | 3.50 | 3.50 |
| 3.66 | 5.05 | 4.58 | 4.31 | 4.14 | 4.13 | 4.36 | 4.32 | 4.11 | 3.72 | 3.12 | 2.77 |
| 3.71 | 5.31 | 5.25 | 5.19 | 4.67 | 4.37 | 3.98 | 3.66 | 3.60 | 3.79 | 3.84 | 3.80 |
| 3.76 | 5.16 | 4.99 | 5.01 | 4.93 | 4.75 | 4.56 | 4.31 | 3.92 | 3.73 | 3.48 | 3.52 |
| 3.81 | 4.95 | 4.71 | 4.45 | 4.15 | 3.93 | 4.05 | 4.02 | 3.87 | 3.60 | 3.34 | 2.90 |
| 3.86 | 4.87 | 4.91 | 4.78 | 4.49 | 4.10 | 3.72 | 3.57 | 3.35 | 3.31 | 3.56 | 3.24 |
| 3.91 | 5.09 | 4.71 | 4.56 | 4.54 | 4.48 | 4.49 | 4.35 | 4.02 | 3.50 | 3.15 | 2.91 |
| 3.96 | 5.40 | 5.04 | 4.92 | 4.54 | 4.13 | 4.05 | 3.86 | 3.76 | 3.79 | 3.56 | 3.18 |
| 4.01 | 5.02 | 4.96 | 5.07 | 4.91 | 4.69 | 4.37 | 3.98 | 3.67 | 3.56 | 3.58 | 3.53 |
| 4.06 | 5.04 | 4.85 | 4.59 | 4.45 | 4.39 | 4.27 | 4.13 | 4.00 | 3.57 | 3.39 | 3.06 |
| 4.11 | 5.22 | 4.90 | 4.62 | 4.29 | 3.93 | 3.71 | 3.53 | 3.51 | 3.55 | 3.32 | 3.10 |
| 4.16 | 4.79 | 4.67 | 4.66 | 4.60 | 4.53 | 4.15 | 3.85 | 3.55 | 3.27 | 3.09 | 3.08 |
| 4.21 | 5.94 | 5.52 | 5.17 | 4.81 | 4.67 | 4.52 | 4.35 | 4.24 | 3.94 | 3.61 | 3.23 |
| 4.26 | 5.17 | 5.08 | 5.01 | 4.74 | 4.38 | 4.13 | 3.84 | 3.76 | 3.57 | 3.51 | 3.44 |
| 4.31 | 4.92 | 4.62 | 4.59 | 4.54 | 4.47 | 4.25 | 4.00 | 3.82 | 3.34 | 3.12 | 2.83 |
| 4.36 | 4.86 | 4.65 | 4.41 | 4.10 | 4.02 | 3.99 | 3.92 | 3.65 | 3.46 | 3.20 | 2.73 |
| 4.41 | 5.00 | 4.78 | 4.69 | 4.53 | 4.31 | 3.87 | 3.65 | 3.37 | 3.25 | 3.16 | 3.00 |
| 4.46 | 5.26 | 5.13 | 4.91 | 4.74 | 4.69 | 4.54 | 4.38 | 4.20 | 3.92 | 3.49 | 3.26 |
| 4.51 | 5.21 | 5.17 | 5.06 | 4.63 | 4.32 | 4.03 | 3.90 | 3.90 | 3.83 | 3.62 | 3.59 |
| 4.56 | 4.96 | 4.78 | 4.77 | 4.52 | 4.39 | 4.15 | 3.80 | 3.62 | 3.53 | 3.22 | 3.19 |
| 4.61 | 4.75 | 4.49 | 4.35 | 4.22 | 4.11 | 3.97 | 3.75 | 3.38 | 3.12 | 2.91 | 2.63 |
| 4.66 | 4.86 | 4.67 | 4.59 | 4.21 | 3.91 | 3.76 | 3.45 | 3.48 | 3.30 | 3.13 | 3.03 |
| 4.71 | 4.87 | 4.52 | 4.58 | 4.48 | 4.37 | 4.16 | 3.99 | 3.80 | 3.46 | 3.29 | 3.13 |

|       |      |      |      |      |      |      |      |      |      |      |      |
|-------|------|------|------|------|------|------|------|------|------|------|------|
| 4.76  | 5.49 | 5.24 | 4.89 | 4.65 | 4.49 | 4.36 | 4.33 | 4.17 | 4.08 | 3.75 | 3.52 |
| 4.81  | 4.77 | 4.73 | 4.55 | 4.33 | 4.13 | 3.88 | 3.65 | 3.45 | 3.33 | 3.23 | 3.14 |
| 4.86  | 4.81 | 4.62 | 4.26 | 4.20 | 4.06 | 3.98 | 3.75 | 3.54 | 3.21 | 2.94 | 2.74 |
| 4.91  | 5.12 | 4.93 | 4.67 | 4.35 | 4.24 | 4.05 | 3.93 | 3.77 | 3.68 | 3.54 | 3.15 |
| 4.96  | 4.94 | 4.79 | 4.69 | 4.49 | 4.25 | 4.09 | 3.91 | 3.56 | 3.42 | 3.19 | 3.12 |
| 5.01  | 4.83 | 4.57 | 4.41 | 4.29 | 4.09 | 3.93 | 3.88 | 3.68 | 3.36 | 3.08 | 2.99 |
| 5.06  | 5.04 | 4.85 | 4.76 | 4.46 | 4.30 | 4.09 | 3.94 | 3.72 | 3.70 | 3.49 | 3.30 |
| 5.11  | 4.54 | 4.34 | 4.33 | 4.16 | 4.02 | 3.71 | 3.66 | 3.42 | 3.17 | 3.04 | 2.82 |
| 5.16  | 4.65 | 4.45 | 4.25 | 3.86 | 3.86 | 3.66 | 3.51 | 3.30 | 3.25 | 2.90 | 2.54 |
| 5.21  | 4.97 | 4.86 | 4.70 | 4.48 | 4.28 | 4.01 | 3.76 | 3.62 | 3.47 | 3.41 | 3.15 |
| 5.26  | 4.90 | 4.67 | 4.48 | 4.27 | 4.28 | 4.00 | 3.86 | 3.72 | 3.43 | 3.18 | 3.00 |
| 5.31  | 4.94 | 4.61 | 4.44 | 4.18 | 3.91 | 3.74 | 3.67 | 3.60 | 3.42 | 3.18 | 2.98 |
| 5.38  | 4.79 | 4.61 | 4.51 | 4.14 | 3.98 | 3.88 | 3.71 | 3.54 | 3.42 | 3.10 | 2.87 |
| 5.45  | 4.98 | 4.78 | 4.53 | 4.45 | 4.20 | 3.93 | 3.88 | 3.80 | 3.55 | 3.32 | 3.01 |
| 5.53  | 4.57 | 4.29 | 4.23 | 3.99 | 3.72 | 3.56 | 3.54 | 3.34 | 3.32 | 3.16 | 3.02 |
| 5.61  | 4.92 | 4.60 | 4.54 | 4.35 | 4.16 | 3.88 | 3.66 | 3.52 | 3.33 | 3.17 | 3.05 |
| 5.70  | 4.65 | 4.39 | 4.26 | 4.09 | 3.90 | 3.79 | 3.62 | 3.50 | 3.29 | 3.11 | 2.85 |
| 5.80  | 4.69 | 4.58 | 4.32 | 4.21 | 4.08 | 3.78 | 3.62 | 3.41 | 3.18 | 3.05 | 2.91 |
| 5.90  | 4.55 | 4.56 | 4.40 | 4.23 | 4.04 | 3.80 | 3.63 | 3.48 | 3.18 | 3.11 | 2.94 |
| 6.01  | 4.81 | 4.72 | 4.53 | 4.37 | 4.15 | 3.93 | 3.73 | 3.44 | 3.36 | 3.12 | 2.99 |
| 6.13  | 4.64 | 4.51 | 4.24 | 4.00 | 3.93 | 3.71 | 3.48 | 3.34 | 3.21 | 2.79 | 2.77 |
| 6.25  | 4.42 | 4.12 | 4.05 | 3.77 | 3.54 | 3.54 | 3.22 | 3.10 | 2.87 | 2.74 | 2.56 |
| 6.39  | 4.48 | 4.28 | 4.17 | 3.85 | 3.73 | 3.53 | 3.40 | 3.14 | 3.01 | 2.68 | 2.51 |
| 6.53  | 4.34 | 4.27 | 4.17 | 3.88 | 3.84 | 3.66 | 3.40 | 3.27 | 3.01 | 2.85 | 2.66 |
| 6.69  | 4.75 | 4.58 | 4.38 | 4.18 | 4.04 | 3.87 | 3.66 | 3.58 | 3.31 | 2.98 | 2.80 |
| 6.85  | 4.50 | 4.37 | 4.13 | 3.93 | 3.70 | 3.50 | 3.28 | 3.18 | 2.96 | 2.76 | 2.67 |
| 7.03  | 4.47 | 4.22 | 4.13 | 3.98 | 3.72 | 3.63 | 3.41 | 3.19 | 3.05 | 2.74 | 2.65 |
| 7.21  | 4.38 | 4.29 | 3.97 | 3.84 | 3.63 | 3.57 | 3.35 | 3.10 | 3.00 | 2.87 | 2.57 |
| 7.41  | 4.34 | 4.21 | 4.04 | 3.78 | 3.64 | 3.46 | 3.40 | 3.16 | 2.85 | 2.72 | 2.56 |
| 7.63  | 4.70 | 4.51 | 4.34 | 4.20 | 4.06 | 3.79 | 3.64 | 3.41 | 3.24 | 3.07 | 2.92 |
| 7.86  | 4.39 | 4.18 | 4.12 | 3.81 | 3.65 | 3.48 | 3.34 | 3.17 | 3.01 | 2.71 | 2.56 |
| 8.10  | 4.23 | 4.10 | 4.00 | 3.69 | 3.49 | 3.30 | 3.06 | 2.95 | 2.88 | 2.65 | 2.48 |
| 8.36  | 4.12 | 3.96 | 3.72 | 3.59 | 3.44 | 3.18 | 3.00 | 2.81 | 2.67 | 2.56 | 2.21 |
| 8.64  | 4.36 | 4.15 | 3.99 | 3.79 | 3.53 | 3.48 | 3.19 | 2.94 | 2.84 | 2.72 | 2.42 |
| 8.94  | 4.56 | 4.39 | 4.05 | 3.87 | 3.69 | 3.47 | 3.33 | 3.10 | 3.02 | 2.69 | 2.53 |
| 9.26  | 4.82 | 4.51 | 4.42 | 4.01 | 3.91 | 3.67 | 3.45 | 3.25 | 3.08 | 2.72 | 2.62 |
| 9.60  | 4.07 | 3.89 | 3.71 | 3.51 | 3.36 | 3.16 | 3.03 | 2.80 | 2.72 | 2.51 | 2.45 |
| 9.97  | 4.00 | 3.91 | 3.80 | 3.60 | 3.47 | 3.21 | 3.12 | 2.97 | 2.84 | 2.70 | 2.52 |
| 10.36 | 4.10 | 3.98 | 3.62 | 3.60 | 3.39 | 3.25 | 3.08 | 2.84 | 2.69 | 2.46 | 2.40 |
| 10.77 | 4.52 | 4.26 | 4.13 | 4.06 | 3.77 | 3.65 | 3.44 | 3.30 | 3.01 | 2.78 | 2.68 |
| 11.22 | 4.42 | 4.19 | 4.12 | 3.75 | 3.40 | 3.26 | 3.04 | 2.74 | 2.67 | 2.48 | 2.46 |
| 11.70 | 4.09 | 3.93 | 3.78 | 3.56 | 3.36 | 3.13 | 3.07 | 2.93 | 2.71 | 2.46 | 2.31 |
| 12.21 | 3.62 | 3.46 | 3.32 | 3.12 | 2.98 | 2.96 | 2.72 | 2.63 | 2.44 | 2.27 | 2.11 |
| 12.75 | 4.12 | 3.82 | 3.76 | 3.50 | 3.40 | 3.26 | 3.05 | 2.82 | 2.71 | 2.62 | 2.41 |
| 13.33 | 4.17 | 3.93 | 3.86 | 3.57 | 3.49 | 3.37 | 3.17 | 3.02 | 2.77 | 2.66 | 2.54 |
| 13.95 | 4.01 | 4.01 | 3.63 | 3.43 | 3.25 | 3.23 | 3.04 | 2.79 | 2.68 | 2.59 | 2.44 |
| 14.62 | 3.86 | 3.70 | 3.58 | 3.36 | 3.18 | 3.04 | 2.94 | 2.68 | 2.51 | 2.34 | 2.20 |
| 15.33 | 3.81 | 3.60 | 3.39 | 3.26 | 3.03 | 2.87 | 2.70 | 2.52 | 2.27 | 2.06 | 1.89 |
| 16.09 | 3.66 | 3.55 | 3.53 | 3.14 | 3.05 | 2.92 | 2.74 | 2.67 | 2.48 | 2.25 | 2.03 |
| 16.90 | 4.07 | 3.94 | 3.67 | 3.43 | 3.30 | 3.16 | 2.91 | 2.84 | 2.63 | 2.43 | 2.27 |

|        |      |      |      |      |      |      |      |      |      |      |      |
|--------|------|------|------|------|------|------|------|------|------|------|------|
| 17.77  | 3.97 | 3.66 | 3.52 | 3.45 | 3.24 | 3.04 | 2.80 | 2.75 | 2.50 | 2.32 | 2.24 |
| 18.70  | 3.93 | 3.81 | 3.68 | 3.40 | 3.15 | 2.99 | 2.76 | 2.67 | 2.47 | 2.24 | 2.00 |
| 19.69  | 3.84 | 3.56 | 3.49 | 3.27 | 3.06 | 2.86 | 2.73 | 2.63 | 2.49 | 2.23 | 2.00 |
| 20.75  | 3.59 | 3.37 | 3.30 | 3.11 | 2.94 | 2.85 | 2.65 | 2.39 | 2.20 | 2.00 | 1.85 |
| 21.89  | 3.91 | 3.80 | 3.58 | 3.33 | 3.12 | 3.01 | 2.81 | 2.57 | 2.48 | 2.31 | 2.10 |
| 23.10  | 4.24 | 3.88 | 3.77 | 3.49 | 3.42 | 3.23 | 2.96 | 2.83 | 2.67 | 2.50 | 2.38 |
| 24.39  | 3.68 | 3.48 | 3.29 | 3.07 | 2.95 | 2.76 | 2.59 | 2.56 | 2.26 | 2.15 | 2.01 |
| 25.78  | 3.86 | 3.64 | 3.37 | 3.14 | 3.00 | 2.82 | 2.65 | 2.54 | 2.39 | 2.16 | 2.01 |
| 27.26  | 3.67 | 3.30 | 3.34 | 3.09 | 2.91 | 2.80 | 2.45 | 2.35 | 2.18 | 1.94 | 1.89 |
| 28.84  | 3.52 | 3.33 | 3.21 | 3.09 | 3.00 | 2.79 | 2.61 | 2.54 | 2.37 | 2.23 | 2.02 |
| 30.53  | 3.83 | 3.61 | 3.31 | 3.26 | 3.00 | 2.83 | 2.60 | 2.51 | 2.29 | 2.11 | 2.00 |
| 32.34  | 3.43 | 3.25 | 3.10 | 2.96 | 2.78 | 2.59 | 2.47 | 2.39 | 2.19 | 2.02 | 1.79 |
| 34.27  | 3.40 | 3.27 | 3.15 | 2.93 | 2.85 | 2.67 | 2.52 | 2.36 | 2.24 | 2.06 | 1.90 |
| 36.34  | 3.47 | 3.22 | 3.01 | 2.90 | 2.57 | 2.63 | 2.24 | 2.22 | 1.97 | 1.76 | 1.64 |
| 38.55  | 3.11 | 3.02 | 2.81 | 2.78 | 2.50 | 2.44 | 2.36 | 2.14 | 2.09 | 1.89 | 1.80 |
| 40.91  | 3.41 | 3.28 | 3.09 | 2.77 | 2.72 | 2.52 | 2.33 | 2.06 | 2.04 | 1.81 | 1.68 |
| 43.43  | 3.07 | 2.98 | 2.79 | 2.59 | 2.54 | 2.32 | 2.20 | 2.08 | 1.89 | 1.84 | 1.68 |
| 46.13  | 3.46 | 3.10 | 2.91 | 2.85 | 2.62 | 2.47 | 2.19 | 2.09 | 1.87 | 1.78 | 1.60 |
| 49.01  | 3.41 | 3.23 | 3.03 | 2.82 | 2.72 | 2.42 | 2.19 | 2.20 | 2.11 | 1.94 | 1.69 |
| 52.09  | 3.45 | 3.31 | 3.15 | 2.86 | 2.82 | 2.66 | 2.38 | 2.27 | 2.22 | 2.00 | 1.79 |
| 55.39  | 3.04 | 2.80 | 2.73 | 2.59 | 2.40 | 2.20 | 2.06 | 2.02 | 1.86 | 1.61 | 1.49 |
| 58.91  | 3.06 | 2.92 | 2.66 | 2.55 | 2.40 | 2.31 | 2.11 | 1.97 | 1.72 | 1.62 | 1.55 |
| 62.68  | 3.25 | 2.99 | 2.89 | 2.77 | 2.54 | 2.39 | 2.21 | 2.11 | 1.88 | 1.74 | 1.59 |
| 66.70  | 3.15 | 2.94 | 2.72 | 2.63 | 2.37 | 2.24 | 2.12 | 1.92 | 1.79 | 1.58 | 1.44 |
| 71.00  | 3.20 | 2.94 | 2.76 | 2.68 | 2.39 | 2.25 | 2.06 | 1.95 | 1.73 | 1.59 | 1.41 |
| 75.60  | 3.29 | 3.01 | 2.79 | 2.65 | 2.43 | 2.29 | 2.11 | 1.89 | 1.69 | 1.52 | 1.26 |
| 80.51  | 2.66 | 2.48 | 2.39 | 2.16 | 2.11 | 2.03 | 1.83 | 1.69 | 1.59 | 1.53 | 1.46 |
| 85.77  | 3.22 | 3.04 | 2.82 | 2.72 | 2.62 | 2.43 | 2.30 | 2.04 | 2.06 | 1.73 | 1.62 |
| 91.38  | 2.88 | 2.71 | 2.61 | 2.39 | 2.25 | 2.09 | 1.89 | 1.75 | 1.67 | 1.41 | 1.42 |
| 97.39  | 3.04 | 2.72 | 2.57 | 2.36 | 2.23 | 2.06 | 1.92 | 1.73 | 1.58 | 1.48 | 1.30 |
| 103.80 | 3.19 | 2.97 | 2.73 | 2.56 | 2.43 | 2.28 | 2.07 | 1.86 | 1.68 | 1.57 | 1.40 |
| 110.66 | 2.78 | 2.54 | 2.46 | 2.27 | 2.13 | 1.96 | 1.74 | 1.56 | 1.51 | 1.23 | 1.14 |
| 117.99 | 2.84 | 2.77 | 2.51 | 2.41 | 2.15 | 2.01 | 1.74 | 1.52 | 1.32 | 1.20 | 1.07 |
| 125.83 | 2.93 | 2.72 | 2.47 | 2.24 | 2.06 | 1.99 | 1.81 | 1.67 | 1.54 | 1.41 | 1.19 |
| 134.21 | 2.75 | 2.50 | 2.36 | 2.17 | 1.91 | 1.79 | 1.65 | 1.54 | 1.37 | 1.03 | 0.97 |
| 143.17 | 2.71 | 2.56 | 2.42 | 2.12 | 1.97 | 1.70 | 1.66 | 1.47 | 1.37 | 1.15 | 0.95 |
| 152.74 | 2.47 | 2.27 | 2.10 | 1.88 | 1.71 | 1.59 | 1.41 | 1.32 | 1.23 | 1.11 | 0.91 |
| 162.97 | 2.58 | 2.37 | 2.17 | 1.97 | 1.88 | 1.73 | 1.52 | 1.43 | 1.24 | 1.01 | 0.96 |
| 173.91 | 2.43 | 2.17 | 2.07 | 1.89 | 1.73 | 1.56 | 1.36 | 1.25 | 1.07 | 0.83 | 0.81 |
| 185.60 | 2.32 | 2.17 | 2.01 | 1.92 | 1.71 | 1.63 | 1.38 | 1.30 | 1.26 | 1.04 | 0.85 |
| 198.10 | 2.48 | 2.30 | 2.15 | 1.96 | 1.75 | 1.63 | 1.43 | 1.28 | 1.04 | 0.89 | 0.74 |
| 211.46 | 2.63 | 2.27 | 2.21 | 2.01 | 1.77 | 1.55 | 1.42 | 1.33 | 1.07 | 0.96 | 0.71 |
| 225.75 | 2.39 | 2.36 | 2.05 | 1.87 | 1.71 | 1.48 | 1.34 | 1.14 | 1.12 | 0.92 | 0.61 |
| 241.01 | 2.39 | 2.17 | 1.97 | 1.78 | 1.61 | 1.33 | 1.24 | 1.14 | 0.99 | 0.78 | 0.64 |
| 257.33 | 2.26 | 2.11 | 1.88 | 1.68 | 1.41 | 1.24 | 1.21 | 1.06 | 0.87 | 0.70 | 0.64 |
| 274.77 | 2.11 | 2.09 | 1.93 | 1.66 | 1.46 | 1.36 | 1.24 | 1.06 | 0.95 | 0.66 | 0.52 |
| 293.42 | 2.17 | 2.05 | 1.80 | 1.66 | 1.42 | 1.35 | 1.15 | 0.90 | 0.84 | 0.67 | 0.46 |
| 313.35 | 2.06 | 1.86 | 1.67 | 1.45 | 1.30 | 1.12 | 0.93 | 0.83 | 0.57 | 0.44 | 0.26 |
| 334.66 | 2.26 | 2.15 | 1.90 | 1.70 | 1.58 | 1.37 | 1.30 | 1.08 | 0.90 | 0.74 | 0.61 |
| 357.43 | 2.19 | 2.02 | 1.77 | 1.75 | 1.48 | 1.33 | 1.07 | 1.01 | 0.90 | 0.73 | 0.51 |

|         |      |      |      |      |       |       |       |       |       |       |       |
|---------|------|------|------|------|-------|-------|-------|-------|-------|-------|-------|
| 381.78  | 1.93 | 1.74 | 1.54 | 1.36 | 1.21  | 1.09  | 0.87  | 0.71  | 0.57  | 0.41  | 0.28  |
| 407.80  | 2.01 | 1.86 | 1.62 | 1.51 | 1.29  | 1.20  | 1.00  | 0.94  | 0.79  | 0.62  | 0.47  |
| 435.62  | 2.30 | 1.92 | 1.70 | 1.49 | 1.42  | 1.16  | 0.99  | 0.91  | 0.73  | 0.51  | 0.41  |
| 465.35  | 1.89 | 1.51 | 1.47 | 1.15 | 1.05  | 0.79  | 0.71  | 0.61  | 0.44  | 0.30  | 0.27  |
| 497.14  | 1.73 | 1.52 | 1.49 | 1.30 | 1.06  | 0.96  | 0.77  | 0.59  | 0.39  | 0.36  | 0.20  |
| 531.11  | 1.70 | 1.47 | 1.31 | 1.20 | 0.99  | 0.77  | 0.64  | 0.52  | 0.48  | 0.16  | 0.08  |
| 567.43  | 1.77 | 1.54 | 1.33 | 1.27 | 1.09  | 0.91  | 0.76  | 0.53  | 0.50  | 0.25  | 0.17  |
| 606.26  | 1.64 | 1.44 | 1.40 | 1.18 | 0.96  | 0.83  | 0.76  | 0.63  | 0.38  | 0.23  | 0.22  |
| 647.76  | 1.47 | 1.34 | 1.14 | 1.00 | 0.79  | 0.69  | 0.43  | 0.30  | 0.31  | 0.09  | -0.02 |
| 692.12  | 1.64 | 1.36 | 1.27 | 1.07 | 0.92  | 0.81  | 0.52  | 0.35  | 0.35  | -0.01 | -0.20 |
| 739.53  | 1.62 | 1.47 | 1.26 | 1.07 | 0.92  | 0.76  | 0.58  | 0.54  | 0.36  | 0.12  | 0.12  |
| 790.22  | 1.60 | 1.49 | 1.40 | 1.16 | 0.90  | 0.87  | 0.64  | 0.57  | 0.39  | 0.15  | 0.06  |
| 844.40  | 1.68 | 1.58 | 1.40 | 1.18 | 0.96  | 0.89  | 0.67  | 0.54  | 0.41  | 0.31  | 0.12  |
| 902.32  | 1.55 | 1.43 | 1.25 | 1.01 | 0.93  | 0.72  | 0.53  | 0.44  | 0.22  | 0.12  | -0.05 |
| 964.23  | 1.49 | 1.32 | 1.06 | 1.02 | 0.90  | 0.79  | 0.56  | 0.50  | 0.19  | 0.08  | -0.06 |
| 1030.41 | 1.30 | 1.16 | 0.98 | 0.83 | 0.67  | 0.56  | 0.32  | 0.29  | 0.01  | -0.01 | -0.30 |
| 1101.15 | 1.39 | 1.25 | 1.03 | 0.77 | 0.64  | 0.36  | 0.37  | 0.12  | -0.11 | -0.26 | -0.50 |
| 1176.77 | 1.52 | 1.26 | 1.07 | 0.87 | 0.66  | 0.62  | 0.42  | 0.28  | 0.12  | -0.08 | -0.27 |
| 1257.60 | 1.31 | 1.23 | 0.98 | 0.82 | 0.58  | 0.47  | 0.37  | 0.13  | 0.05  | 0.04  | -0.27 |
| 1344.00 | 1.41 | 1.30 | 0.94 | 0.80 | 0.71  | 0.48  | 0.26  | 0.19  | 0.09  | -0.15 | -0.32 |
| 1436.36 | 1.20 | 0.98 | 0.83 | 0.59 | 0.44  | 0.21  | 0.07  | 0.02  | -0.28 | -0.47 | -0.63 |
| 1535.09 | 1.20 | 0.99 | 0.87 | 0.63 | 0.46  | 0.27  | 0.18  | 0.13  | 0.01  | -0.30 | -0.43 |
| 1640.63 | 1.40 | 1.26 | 0.99 | 0.81 | 0.58  | 0.50  | 0.31  | 0.16  | 0.01  | -0.23 | -0.35 |
| 1753.44 | 1.09 | 0.87 | 0.69 | 0.43 | 0.23  | 0.13  | -0.06 | -0.32 | -0.36 | -0.58 | -0.67 |
| 1874.02 | 1.24 | 1.07 | 0.99 | 0.72 | 0.53  | 0.43  | 0.23  | 0.06  | -0.10 | -0.30 | -0.40 |
| 2002.92 | 1.05 | 0.79 | 0.63 | 0.32 | 0.25  | 0.02  | -0.19 | -0.29 | -0.36 | -0.54 | -0.64 |
| 2140.71 | 1.03 | 0.80 | 0.64 | 0.31 | 0.20  | 0.12  | -0.11 | -0.34 | -0.46 | -0.57 | -0.73 |
| 2288.00 | 0.80 | 0.66 | 0.52 | 0.23 | 0.19  | 0.03  | -0.12 | -0.31 | -0.39 | -0.56 | -0.74 |
| 2445.44 | 1.16 | 0.82 | 0.80 | 0.46 | 0.29  | 0.24  | -0.01 | -0.19 | -0.28 | -0.51 | -0.61 |
| 2613.73 | 1.18 | 0.99 | 0.80 | 0.67 | 0.45  | 0.27  | -0.02 | -0.13 | -0.32 | -0.50 | -0.54 |
| 2793.63 | 0.91 | 0.73 | 0.55 | 0.32 | 0.18  | -0.08 | -0.13 | -0.21 | -0.39 | -0.56 | -0.77 |
| 2985.93 | 0.66 | 0.59 | 0.36 | 0.13 | -0.03 | -0.15 | -0.31 | -0.48 | -0.42 | -0.60 | -0.70 |
| 3191.49 | 1.23 | 1.01 | 0.83 | 0.71 | 0.56  | 0.27  | 0.18  | 0.08  | -0.09 | -0.30 | -0.34 |
| 3411.21 | 1.13 | 0.85 | 0.70 | 0.47 | 0.37  | 0.32  | 0.09  | -0.08 | -0.21 | -0.41 | -0.40 |
| 3646.09 | 1.82 | 1.56 | 1.52 | 1.18 | 1.01  | 0.80  | 0.61  | 0.48  | 0.29  | 0.08  | -0.20 |
| 3897.16 | 1.57 | 1.34 | 1.11 | 0.90 | 0.77  | 0.61  | 0.45  | 0.31  | 0.05  | -0.01 | -0.28 |

| Wavelength<br>(nm) | 459.41 | 460.83 | 462.25 | 463.68 | 465.10 | 466.53 | 467.95 | 469.37 | 470.80 | 472.22 | 473.65 |
|--------------------|--------|--------|--------|--------|--------|--------|--------|--------|--------|--------|--------|
| Time<br>(ps)       |        |        |        |        |        |        |        |        |        |        |        |
| -2.74              | -0.11  | -0.14  | -0.13  | -0.22  | -0.17  | -0.22  | -0.19  | -0.19  | -0.22  | -0.19  | -0.22  |
| -2.24              | 0.00   | 0.04   | 0.17   | 0.09   | 0.13   | 0.14   | 0.12   | 0.08   | 0.21   | 0.18   | 0.21   |
| -1.74              | 0.12   | 0.08   | 0.17   | 0.19   | 0.17   | 0.20   | 0.13   | 0.15   | 0.14   | 0.25   | 0.13   |
| -1.24              | -0.07  | 0.00   | -0.03  | 0.01   | -0.03  | -0.03  | -0.13  | -0.05  | 0.04   | -0.03  | -0.10  |
| -0.74              | -0.04  | -0.12  | -0.19  | -0.17  | -0.17  | -0.18  | -0.18  | -0.11  | -0.10  | -0.07  | -0.19  |
| -0.24              | 0.11   | 0.06   | 0.04   | 0.04   | 0.08   | -0.05  | 0.00   | 0.07   | -0.05  | -0.08  | 0.10   |
| -0.14              | -0.13  | -0.14  | -0.14  | 0.00   | -0.18  | -0.09  | 0.04   | -0.06  | -0.13  | -0.18  | -0.10  |
| -0.04              | 0.12   | 0.23   | 0.12   | 0.06   | 0.17   | 0.23   | 0.20   | 0.10   | 0.10   | 0.12   | 0.18   |
| 0.06               | -0.15  | -0.14  | -0.08  | -0.08  | -0.10  | -0.15  | -0.20  | -0.06  | -0.10  | -0.10  | -0.16  |
| 0.16               | -0.04  | -0.01  | 0.00   | 0.04   | -0.11  | 0.00   | 0.12   | 0.10   | 0.06   | -0.02  | 0.06   |

|      |        |        |        |        |        |        |        |        |        |        |         |
|------|--------|--------|--------|--------|--------|--------|--------|--------|--------|--------|---------|
| 0.26 | -0.10  | -0.17  | -0.11  | -0.10  | -0.02  | -0.05  | -0.04  | 0.01   | -0.06  | -0.02  | -0.06   |
| 0.31 | 0.03   | 0.06   | 0.10   | 0.25   | 0.01   | 0.03   | 0.10   | 0.00   | 0.15   | 0.11   | 0.17    |
| 0.36 | 0.08   | 0.16   | 0.12   | 0.06   | -0.11  | -0.07  | 0.08   | 0.03   | -0.01  | 0.05   | -0.02   |
| 0.41 | -0.07  | 0.05   | -0.09  | -0.07  | -0.09  | -0.10  | -0.10  | -0.03  | -0.05  | 0.03   | -0.08   |
| 0.46 | -0.11  | 0.05   | -0.05  | -0.07  | -0.03  | -0.10  | -0.09  | -0.08  | -0.07  | 0.08   | -0.07   |
| 0.51 | 0.07   | 0.00   | -0.01  | 0.20   | 0.13   | 0.02   | 0.10   | 0.01   | 0.09   | 0.18   | 0.17    |
| 0.56 | -0.03  | -0.13  | 0.04   | 0.06   | -0.02  | 0.01   | 0.13   | 0.01   | 0.01   | 0.03   | -0.01   |
| 0.61 | -0.06  | -0.05  | -0.01  | 0.03   | 0.04   | -0.06  | -0.02  | 0.02   | -0.14  | -0.04  | -0.05   |
| 0.66 | -0.09  | -0.01  | -0.09  | 0.05   | -0.11  | -0.02  | 0.01   | 0.02   | -0.04  | 0.02   | -0.09   |
| 0.71 | 0.00   | 0.03   | -0.05  | -0.03  | -0.13  | -0.04  | 0.00   | -0.04  | 0.02   | -0.03  | -0.06   |
| 0.76 | -0.06  | -0.03  | -0.03  | 0.03   | 0.03   | -0.04  | -0.06  | 0.03   | -0.05  | -0.03  | -0.03   |
| 0.81 | -0.07  | 0.09   | 0.04   | -0.05  | -0.14  | -0.10  | -0.07  | 0.00   | -0.13  | -0.05  | -0.17   |
| 0.86 | -0.03  | 0.06   | 0.01   | 0.04   | 0.08   | 0.02   | -0.02  | -0.01  | -0.07  | 0.02   | -0.05   |
| 0.91 | -0.17  | 0.04   | -0.07  | 0.09   | -0.03  | 0.12   | 0.04   | -0.02  | 0.04   | 0.00   | 0.00    |
| 0.96 | 0.07   | -0.03  | 0.07   | 0.10   | -0.05  | -0.07  | 0.19   | 0.07   | -0.03  | 0.07   | 0.00    |
| 1.01 | -0.27  | 0.05   | 0.22   | 0.12   | -0.14  | 0.06   | 0.19   | 0.30   | 0.07   | 0.25   | 0.39    |
| 1.06 | 2.75   | 1.75   | -0.17  | -1.46  | -1.75  | -0.94  | -0.34  | -0.09  | -0.10  | -0.22  | -0.26   |
| 1.11 | 19.96  | -10.01 | -34.00 | -51.82 | -64.04 | -68.88 | -66.62 | -57.91 | -44.70 | -29.65 | -15.98  |
| 1.16 | 464.15 | 440.85 | 413.24 | 380.86 | 343.11 | 299.50 | 252.11 | 199.90 | 145.52 | 93.12  | 47.85   |
| 1.21 | -81.78 | -19.38 | 53.86  | 132.27 | 213.12 | 292.41 | 367.76 | 430.81 | 475.21 | 496.85 | 501.66  |
| 1.26 | 16.13  | 11.34  | 12.07  | 17.60  | 21.96  | 18.44  | 2.38   | -25.16 | -59.46 | -93.92 | -123.98 |
| 1.31 | 10.31  | 8.99   | 6.42   | 3.87   | 2.26   | 1.26   | 0.98   | 2.73   | 7.62   | 14.59  | 20.72   |
| 1.36 | 2.07   | 4.55   | 7.93   | 10.84  | 12.23  | 11.81  | 10.08  | 7.69   | 5.70   | 5.00   | 5.33    |
| 1.41 | 8.11   | 5.96   | 4.33   | 4.04   | 5.08   | 7.27   | 9.32   | 10.27  | 9.68   | 7.71   | 4.62    |
| 1.46 | 8.57   | 10.72  | 11.09  | 9.14   | 5.82   | 2.54   | 0.25   | -0.29  | 1.19   | 3.81   | 6.68    |
| 1.51 | 3.78   | 2.60   | 2.87   | 4.26   | 6.05   | 7.45   | 7.68   | 6.73   | 4.91   | 3.03   | 1.58    |
| 1.56 | 7.52   | 4.98   | 2.36   | 0.81   | 0.85   | 2.60   | 5.35   | 7.96   | 9.35   | 9.19   | 7.32    |
| 1.61 | 6.45   | 8.10   | 8.62   | 7.64   | 5.49   | 3.26   | 1.86   | 1.47   | 2.39   | 4.22   | 6.05    |
| 1.66 | 3.46   | 2.85   | 3.41   | 4.88   | 6.52   | 7.43   | 7.50   | 6.02   | 4.04   | 2.13   | 0.67    |
| 1.71 | 7.80   | 7.71   | 6.17   | 4.09   | 1.89   | 0.70   | 0.68   | 1.90   | 3.63   | 5.43   | 6.58    |
| 1.76 | 2.35   | 3.37   | 5.09   | 6.43   | 6.97   | 6.30   | 4.97   | 3.18   | 1.98   | 1.70   | 2.39    |
| 1.81 | 4.00   | 2.61   | 1.99   | 2.16   | 3.25   | 4.88   | 6.01   | 6.25   | 5.49   | 4.05   | 2.30    |
| 1.86 | 6.60   | 6.23   | 4.99   | 3.22   | 1.85   | 1.01   | 1.22   | 2.23   | 3.41   | 4.48   | 4.79    |
| 1.91 | 1.83   | 2.32   | 3.28   | 4.51   | 5.39   | 5.30   | 4.47   | 2.80   | 1.40   | 0.49   | 0.43    |
| 1.96 | 5.42   | 4.12   | 2.50   | 1.52   | 1.37   | 2.27   | 3.63   | 4.90   | 5.56   | 5.53   | 4.42    |
| 2.01 | 3.75   | 5.30   | 6.53   | 6.37   | 5.27   | 3.30   | 1.62   | 0.61   | 0.63   | 1.57   | 3.12    |
| 2.06 | 3.27   | 2.27   | 2.23   | 2.72   | 3.59   | 4.44   | 4.77   | 4.36   | 3.36   | 2.01   | 0.91    |
| 2.11 | 4.95   | 3.96   | 2.70   | 1.57   | 1.12   | 1.37   | 2.22   | 3.38   | 4.24   | 4.50   | 4.14    |
| 2.16 | 2.43   | 3.37   | 4.41   | 5.05   | 4.88   | 4.17   | 2.96   | 1.72   | 1.14   | 1.18   | 1.76    |
| 2.21 | 3.99   | 2.76   | 2.20   | 2.19   | 2.87   | 3.84   | 4.68   | 5.03   | 4.52   | 3.57   | 2.14    |
| 2.26 | 5.09   | 5.53   | 5.22   | 4.29   | 2.89   | 1.76   | 1.10   | 1.28   | 2.15   | 3.15   | 3.90    |
| 2.31 | 2.28   | 2.16   | 2.53   | 3.15   | 3.69   | 3.80   | 3.53   | 2.70   | 1.82   | 1.27   | 0.96    |
| 2.36 | 3.17   | 2.69   | 2.41   | 2.46   | 2.82   | 3.28   | 3.55   | 3.46   | 3.08   | 2.50   | 1.74    |
| 2.41 | 4.35   | 4.93   | 4.89   | 4.13   | 2.87   | 1.76   | 1.02   | 0.95   | 1.50   | 2.30   | 3.10    |
| 2.46 | 2.60   | 2.03   | 1.97   | 2.44   | 3.01   | 3.58   | 3.74   | 3.35   | 2.68   | 1.70   | 1.00    |
| 2.51 | 5.24   | 5.15   | 4.20   | 3.03   | 1.85   | 1.26   | 1.41   | 2.07   | 3.05   | 4.09   | 4.43    |
| 2.56 | 2.87   | 3.47   | 3.93   | 4.08   | 3.79   | 3.22   | 2.38   | 1.75   | 1.44   | 1.50   | 1.73    |
| 2.61 | 2.41   | 2.14   | 2.35   | 2.73   | 3.16   | 3.48   | 3.28   | 2.66   | 1.99   | 1.33   | 0.87    |
| 2.66 | 4.37   | 4.07   | 3.38   | 2.39   | 1.64   | 1.51   | 1.67   | 2.22   | 2.94   | 3.27   | 3.39    |
| 2.71 | 2.28   | 2.65   | 3.32   | 3.71   | 3.81   | 3.45   | 2.77   | 1.93   | 1.39   | 1.09   | 1.23    |

|      |      |      |      |      |      |      |      |      |      |      |      |
|------|------|------|------|------|------|------|------|------|------|------|------|
| 2.76 | 4.12 | 3.26 | 2.69 | 2.20 | 2.25 | 2.59 | 3.18 | 3.58 | 3.60 | 3.17 | 2.63 |
| 2.81 | 3.78 | 3.89 | 3.70 | 3.25 | 2.41 | 1.77 | 1.35 | 1.36 | 1.59 | 2.11 | 2.53 |
| 2.86 | 2.44 | 2.48 | 2.75 | 3.06 | 3.05 | 2.91 | 2.42 | 1.87 | 1.41 | 1.11 | 0.98 |
| 2.91 | 3.91 | 3.32 | 2.76 | 2.10 | 1.74 | 1.94 | 2.21 | 2.66 | 3.04 | 3.01 | 2.63 |
| 2.96 | 3.28 | 3.59 | 3.82 | 3.59 | 3.09 | 2.60 | 1.79 | 1.45 | 1.42 | 1.79 | 2.11 |
| 3.01 | 3.32 | 2.62 | 2.26 | 2.19 | 2.27 | 2.64 | 3.06 | 3.14 | 2.81 | 2.50 | 1.75 |
| 3.06 | 3.77 | 3.68 | 3.27 | 2.66 | 1.99 | 1.66 | 1.74 | 1.77 | 2.17 | 2.50 | 2.65 |
| 3.11 | 2.69 | 2.85 | 2.97 | 3.15 | 2.84 | 2.43 | 2.01 | 1.57 | 1.36 | 1.40 | 1.60 |
| 3.16 | 3.10 | 2.61 | 2.06 | 1.88 | 2.00 | 2.38 | 2.61 | 2.73 | 2.62 | 2.32 | 1.70 |
| 3.21 | 3.50 | 3.37 | 3.09 | 2.68 | 2.17 | 1.94 | 1.92 | 1.92 | 2.10 | 2.34 | 2.37 |
| 3.26 | 2.79 | 2.65 | 2.75 | 2.98 | 2.96 | 2.96 | 2.70 | 2.42 | 2.06 | 1.69 | 1.41 |
| 3.31 | 3.64 | 3.11 | 2.71 | 2.34 | 2.15 | 2.31 | 2.57 | 2.67 | 2.84 | 2.66 | 2.33 |
| 3.36 | 3.45 | 3.61 | 3.54 | 3.31 | 2.93 | 2.39 | 2.19 | 2.00 | 2.07 | 2.41 | 2.43 |
| 3.41 | 2.81 | 2.48 | 2.53 | 2.61 | 2.73 | 2.90 | 2.83 | 2.57 | 2.09 | 1.77 | 1.37 |
| 3.46 | 3.51 | 3.24 | 2.81 | 2.27 | 1.90 | 1.81 | 1.94 | 2.11 | 2.43 | 2.62 | 2.34 |
| 3.51 | 2.97 | 3.09 | 3.04 | 3.19 | 3.01 | 2.74 | 2.43 | 2.00 | 1.82 | 1.81 | 1.80 |
| 3.56 | 3.16 | 2.70 | 2.26 | 2.15 | 2.33 | 2.61 | 2.74 | 2.67 | 2.42 | 2.15 | 1.75 |
| 3.61 | 3.47 | 3.16 | 2.88 | 2.61 | 2.19 | 2.05 | 1.95 | 2.01 | 2.23 | 2.18 | 2.17 |
| 3.66 | 2.52 | 2.44 | 2.53 | 2.73 | 2.75 | 2.53 | 2.30 | 1.84 | 1.51 | 1.31 | 1.20 |
| 3.71 | 3.61 | 3.26 | 2.92 | 2.55 | 2.26 | 2.41 | 2.45 | 2.68 | 2.77 | 2.65 | 2.58 |
| 3.76 | 3.45 | 3.35 | 3.40 | 3.07 | 2.82 | 2.48 | 2.37 | 2.18 | 2.14 | 2.20 | 2.24 |
| 3.81 | 2.60 | 2.33 | 2.48 | 2.45 | 2.49 | 2.48 | 2.30 | 2.18 | 1.80 | 1.62 | 1.42 |
| 3.86 | 3.15 | 2.69 | 2.50 | 2.08 | 1.82 | 1.80 | 1.85 | 1.91 | 2.01 | 1.98 | 1.78 |
| 3.91 | 2.83 | 2.94 | 2.90 | 2.93 | 2.74 | 2.40 | 2.15 | 1.83 | 1.57 | 1.68 | 1.63 |
| 3.96 | 3.00 | 2.62 | 2.36 | 2.28 | 2.35 | 2.43 | 2.50 | 2.40 | 2.23 | 1.93 | 1.58 |
| 4.01 | 3.59 | 3.47 | 3.21 | 2.83 | 2.38 | 2.12 | 2.03 | 2.06 | 2.21 | 2.28 | 2.43 |
| 4.06 | 2.86 | 2.92 | 2.94 | 2.90 | 2.70 | 2.52 | 2.27 | 2.02 | 1.77 | 1.86 | 1.67 |
| 4.11 | 2.72 | 2.41 | 2.05 | 1.98 | 1.90 | 1.99 | 2.04 | 1.98 | 1.82 | 1.69 | 1.43 |
| 4.16 | 3.12 | 3.12 | 3.00 | 2.77 | 2.37 | 2.16 | 2.00 | 1.79 | 1.91 | 1.92 | 2.00 |
| 4.21 | 2.94 | 2.68 | 2.55 | 2.55 | 2.43 | 2.51 | 2.36 | 2.08 | 1.79 | 1.72 | 1.50 |
| 4.26 | 3.28 | 3.02 | 2.84 | 2.44 | 2.29 | 2.17 | 2.03 | 2.02 | 2.11 | 2.13 | 2.12 |
| 4.31 | 2.82 | 2.84 | 2.78 | 2.59 | 2.34 | 2.09 | 1.93 | 1.58 | 1.42 | 1.57 | 1.56 |
| 4.36 | 2.63 | 2.55 | 2.43 | 2.35 | 2.24 | 2.26 | 2.06 | 1.87 | 1.67 | 1.58 | 1.44 |
| 4.41 | 2.96 | 2.79 | 2.52 | 2.15 | 1.82 | 1.70 | 1.67 | 1.73 | 1.73 | 1.89 | 1.75 |
| 4.46 | 3.12 | 3.04 | 3.02 | 2.95 | 2.78 | 2.62 | 2.44 | 2.14 | 1.97 | 1.88 | 1.91 |
| 4.51 | 3.27 | 2.93 | 2.77 | 2.61 | 2.33 | 2.39 | 2.37 | 2.27 | 2.28 | 2.14 | 1.97 |
| 4.56 | 3.18 | 2.88 | 2.74 | 2.53 | 2.14 | 2.03 | 1.86 | 1.89 | 1.98 | 1.89 | 1.82 |
| 4.61 | 2.52 | 2.52 | 2.41 | 2.27 | 2.19 | 1.81 | 1.71 | 1.46 | 1.37 | 1.32 | 1.39 |
| 4.66 | 2.93 | 2.63 | 2.31 | 2.17 | 2.05 | 1.96 | 2.01 | 2.09 | 1.89 | 1.86 | 1.62 |
| 4.71 | 3.05 | 3.06 | 3.04 | 2.84 | 2.72 | 2.31 | 2.22 | 2.08 | 1.97 | 1.98 | 1.93 |
| 4.76 | 3.17 | 2.94 | 2.77 | 2.69 | 2.68 | 2.62 | 2.47 | 2.41 | 2.33 | 1.98 | 1.77 |
| 4.81 | 2.89 | 2.71 | 2.55 | 2.32 | 2.05 | 1.98 | 1.96 | 1.88 | 1.99 | 1.81 | 1.79 |
| 4.86 | 2.65 | 2.52 | 2.48 | 2.30 | 2.14 | 1.93 | 1.70 | 1.52 | 1.48 | 1.47 | 1.40 |
| 4.91 | 2.99 | 2.70 | 2.65 | 2.54 | 2.40 | 2.36 | 2.25 | 2.08 | 1.91 | 1.90 | 1.71 |
| 4.96 | 3.09 | 2.96 | 2.85 | 2.63 | 2.16 | 2.05 | 1.90 | 1.72 | 1.72 | 1.77 | 1.74 |
| 5.01 | 2.83 | 2.74 | 2.65 | 2.43 | 2.37 | 2.31 | 2.16 | 1.99 | 1.80 | 1.72 | 1.66 |
| 5.06 | 3.12 | 2.88 | 2.58 | 2.45 | 2.32 | 2.26 | 2.28 | 2.08 | 2.11 | 1.92 | 1.77 |
| 5.11 | 2.78 | 2.70 | 2.58 | 2.29 | 2.18 | 1.95 | 1.79 | 1.76 | 1.84 | 1.78 | 1.62 |
| 5.16 | 2.44 | 2.36 | 2.24 | 2.25 | 2.20 | 1.98 | 1.91 | 1.69 | 1.56 | 1.51 | 1.40 |
| 5.21 | 2.98 | 2.73 | 2.56 | 2.24 | 2.13 | 1.96 | 2.01 | 1.72 | 1.70 | 1.67 | 1.50 |



|       |      |      |      |      |      |      |      |      |      |      |      |
|-------|------|------|------|------|------|------|------|------|------|------|------|
| 5.26  | 2.75 | 2.75 | 2.64 | 2.54 | 2.34 | 2.31 | 2.22 | 1.96 | 1.85 | 1.80 | 1.74 |
| 5.31  | 2.78 | 2.49 | 2.47 | 2.21 | 2.26 | 2.13 | 2.16 | 1.93 | 1.78 | 1.72 | 1.60 |
| 5.38  | 2.82 | 2.47 | 2.40 | 2.24 | 2.11 | 2.14 | 1.90 | 1.78 | 1.66 | 1.52 | 1.40 |
| 5.45  | 2.88 | 2.78 | 2.67 | 2.43 | 2.28 | 2.20 | 1.95 | 1.91 | 1.82 | 1.77 | 1.50 |
| 5.53  | 2.88 | 2.64 | 2.45 | 2.40 | 2.11 | 2.14 | 2.00 | 1.98 | 1.93 | 1.88 | 1.65 |
| 5.61  | 2.92 | 2.81 | 2.57 | 2.45 | 2.20 | 2.11 | 1.99 | 1.92 | 1.92 | 1.87 | 1.75 |
| 5.70  | 2.74 | 2.58 | 2.30 | 2.29 | 2.11 | 2.10 | 2.03 | 1.89 | 1.76 | 1.68 | 1.53 |
| 5.80  | 2.76 | 2.63 | 2.33 | 2.24 | 2.06 | 1.98 | 1.68 | 1.81 | 1.70 | 1.62 | 1.69 |
| 5.90  | 2.80 | 2.57 | 2.42 | 2.25 | 2.03 | 1.87 | 1.74 | 1.80 | 1.74 | 1.65 | 1.54 |
| 6.01  | 2.89 | 2.73 | 2.55 | 2.44 | 2.25 | 2.18 | 2.07 | 1.98 | 1.93 | 1.98 | 1.83 |
| 6.13  | 2.66 | 2.42 | 2.32 | 2.19 | 1.99 | 1.90 | 1.81 | 1.64 | 1.59 | 1.63 | 1.57 |
| 6.25  | 2.31 | 2.16 | 2.02 | 1.87 | 1.81 | 1.63 | 1.69 | 1.49 | 1.34 | 1.32 | 1.13 |
| 6.39  | 2.38 | 2.19 | 2.17 | 1.94 | 1.80 | 1.69 | 1.56 | 1.45 | 1.41 | 1.38 | 1.35 |
| 6.53  | 2.56 | 2.38 | 2.15 | 2.05 | 1.89 | 1.85 | 1.56 | 1.49 | 1.48 | 1.46 | 1.37 |
| 6.69  | 2.63 | 2.42 | 2.33 | 2.26 | 2.09 | 1.98 | 2.00 | 1.80 | 1.64 | 1.57 | 1.52 |
| 6.85  | 2.47 | 2.26 | 2.17 | 1.93 | 1.82 | 1.70 | 1.61 | 1.55 | 1.43 | 1.37 | 1.28 |
| 7.03  | 2.41 | 2.28 | 2.10 | 2.02 | 1.88 | 1.67 | 1.69 | 1.53 | 1.53 | 1.47 | 1.33 |
| 7.21  | 2.48 | 2.31 | 2.20 | 2.12 | 1.94 | 1.88 | 1.72 | 1.62 | 1.57 | 1.57 | 1.35 |
| 7.41  | 2.41 | 2.23 | 2.17 | 1.93 | 1.91 | 1.84 | 1.84 | 1.61 | 1.54 | 1.44 | 1.48 |
| 7.63  | 2.64 | 2.58 | 2.46 | 2.26 | 2.14 | 2.04 | 1.93 | 1.79 | 1.89 | 1.78 | 1.60 |
| 7.86  | 2.43 | 2.20 | 2.11 | 2.03 | 1.78 | 1.70 | 1.71 | 1.71 | 1.52 | 1.52 | 1.31 |
| 8.10  | 2.36 | 2.19 | 1.99 | 1.92 | 1.78 | 1.68 | 1.65 | 1.52 | 1.41 | 1.35 | 1.22 |
| 8.36  | 2.13 | 1.79 | 1.84 | 1.64 | 1.46 | 1.38 | 1.24 | 1.21 | 1.17 | 1.12 | 1.05 |
| 8.64  | 2.25 | 2.05 | 2.01 | 1.89 | 1.74 | 1.55 | 1.56 | 1.41 | 1.32 | 1.26 | 1.21 |
| 8.94  | 2.53 | 2.30 | 2.12 | 1.95 | 1.87 | 1.69 | 1.61 | 1.57 | 1.51 | 1.49 | 1.38 |
| 9.26  | 2.55 | 2.41 | 2.30 | 2.04 | 1.81 | 1.79 | 1.76 | 1.66 | 1.56 | 1.58 | 1.51 |
| 9.60  | 2.32 | 2.08 | 1.98 | 1.95 | 1.66 | 1.63 | 1.51 | 1.45 | 1.39 | 1.39 | 1.33 |
| 9.97  | 2.35 | 2.23 | 2.13 | 1.87 | 1.79 | 1.73 | 1.71 | 1.53 | 1.47 | 1.42 | 1.49 |
| 10.36 | 2.22 | 2.06 | 2.01 | 1.77 | 1.68 | 1.55 | 1.48 | 1.42 | 1.35 | 1.32 | 1.33 |
| 10.77 | 2.45 | 2.30 | 2.12 | 1.93 | 1.78 | 1.65 | 1.64 | 1.53 | 1.50 | 1.53 | 1.41 |
| 11.22 | 2.20 | 1.99 | 1.92 | 1.87 | 1.65 | 1.53 | 1.57 | 1.42 | 1.37 | 1.31 | 1.29 |
| 11.70 | 2.25 | 2.02 | 1.95 | 1.76 | 1.62 | 1.65 | 1.53 | 1.48 | 1.36 | 1.35 | 1.27 |
| 12.21 | 2.02 | 1.92 | 1.74 | 1.71 | 1.48 | 1.42 | 1.41 | 1.28 | 1.26 | 1.19 | 1.07 |
| 12.75 | 2.27 | 2.15 | 2.02 | 1.78 | 1.75 | 1.60 | 1.54 | 1.56 | 1.38 | 1.37 | 1.31 |
| 13.33 | 2.33 | 2.22 | 2.13 | 1.95 | 1.82 | 1.77 | 1.62 | 1.61 | 1.55 | 1.52 | 1.49 |
| 13.95 | 2.22 | 2.01 | 1.84 | 1.93 | 1.68 | 1.58 | 1.48 | 1.51 | 1.27 | 1.41 | 1.32 |
| 14.62 | 2.02 | 1.96 | 1.83 | 1.73 | 1.55 | 1.51 | 1.37 | 1.32 | 1.16 | 1.30 | 1.24 |
| 15.33 | 1.81 | 1.69 | 1.48 | 1.47 | 1.27 | 1.21 | 1.13 | 1.02 | 1.04 | 0.95 | 0.85 |
| 16.09 | 2.02 | 1.81 | 1.78 | 1.60 | 1.46 | 1.47 | 1.31 | 1.29 | 1.09 | 1.09 | 1.03 |
| 16.90 | 2.20 | 2.03 | 1.79 | 1.80 | 1.50 | 1.47 | 1.42 | 1.27 | 1.27 | 1.24 | 1.16 |
| 17.77 | 2.06 | 1.86 | 1.91 | 1.70 | 1.64 | 1.43 | 1.43 | 1.38 | 1.18 | 1.20 | 1.14 |
| 18.70 | 1.80 | 1.67 | 1.61 | 1.45 | 1.26 | 1.22 | 1.21 | 1.11 | 0.92 | 1.03 | 0.97 |
| 19.69 | 1.99 | 1.91 | 1.71 | 1.64 | 1.49 | 1.34 | 1.31 | 1.18 | 1.20 | 1.20 | 1.09 |
| 20.75 | 1.82 | 1.68 | 1.51 | 1.38 | 1.38 | 1.32 | 1.08 | 1.08 | 1.10 | 1.01 | 0.99 |
| 21.89 | 2.00 | 1.93 | 1.81 | 1.66 | 1.56 | 1.46 | 1.34 | 1.39 | 1.18 | 1.20 | 1.04 |
| 23.10 | 2.18 | 2.01 | 1.90 | 1.86 | 1.65 | 1.49 | 1.51 | 1.40 | 1.44 | 1.40 | 1.29 |
| 24.39 | 1.85 | 1.72 | 1.63 | 1.48 | 1.29 | 1.21 | 1.16 | 1.07 | 1.17 | 1.07 | 0.99 |
| 25.78 | 1.94 | 1.84 | 1.63 | 1.62 | 1.43 | 1.43 | 1.30 | 1.28 | 1.28 | 1.14 | 1.13 |
| 27.26 | 1.72 | 1.60 | 1.48 | 1.35 | 1.27 | 1.16 | 1.21 | 1.01 | 1.02 | 0.98 | 0.88 |
| 28.84 | 1.84 | 1.77 | 1.74 | 1.59 | 1.49 | 1.48 | 1.44 | 1.27 | 1.30 | 1.27 | 1.13 |

|        |       |       |       |       |       |       |       |       |       |       |       |
|--------|-------|-------|-------|-------|-------|-------|-------|-------|-------|-------|-------|
| 30.53  | 1.88  | 1.74  | 1.59  | 1.47  | 1.45  | 1.35  | 1.29  | 1.15  | 1.12  | 1.11  | 1.16  |
| 32.34  | 1.83  | 1.68  | 1.50  | 1.46  | 1.24  | 1.13  | 1.15  | 1.03  | 0.89  | 0.99  | 0.94  |
| 34.27  | 1.84  | 1.67  | 1.60  | 1.49  | 1.32  | 1.28  | 1.22  | 1.27  | 1.18  | 1.15  | 1.02  |
| 36.34  | 1.42  | 1.26  | 1.17  | 1.16  | 0.96  | 0.92  | 0.82  | 0.81  | 0.64  | 0.75  | 0.71  |
| 38.55  | 1.76  | 1.73  | 1.55  | 1.49  | 1.31  | 1.34  | 1.21  | 1.26  | 1.23  | 1.21  | 1.19  |
| 40.91  | 1.64  | 1.43  | 1.30  | 1.35  | 1.10  | 1.07  | 1.03  | 0.97  | 0.93  | 0.95  | 0.83  |
| 43.43  | 1.55  | 1.46  | 1.29  | 1.31  | 1.20  | 1.16  | 1.10  | 1.04  | 0.98  | 0.93  | 0.90  |
| 46.13  | 1.39  | 1.30  | 1.16  | 0.97  | 0.92  | 0.75  | 0.86  | 0.82  | 0.72  | 0.71  | 0.61  |
| 49.01  | 1.57  | 1.40  | 1.47  | 1.10  | 1.10  | 1.04  | 1.05  | 0.84  | 0.87  | 0.97  | 0.84  |
| 52.09  | 1.58  | 1.48  | 1.43  | 1.24  | 1.14  | 1.09  | 0.90  | 0.86  | 0.71  | 0.87  | 0.78  |
| 55.39  | 1.38  | 1.26  | 1.18  | 1.10  | 0.94  | 0.87  | 0.94  | 0.85  | 0.73  | 0.75  | 0.74  |
| 58.91  | 1.45  | 1.33  | 1.15  | 1.06  | 1.07  | 1.04  | 0.92  | 0.75  | 0.74  | 0.76  | 0.70  |
| 62.68  | 1.54  | 1.35  | 1.27  | 1.15  | 0.85  | 0.91  | 0.92  | 0.80  | 0.65  | 0.66  | 0.68  |
| 66.70  | 1.37  | 1.20  | 1.15  | 0.92  | 0.89  | 0.86  | 0.71  | 0.70  | 0.60  | 0.72  | 0.66  |
| 71.00  | 1.19  | 1.15  | 1.04  | 0.94  | 0.84  | 0.72  | 0.66  | 0.70  | 0.53  | 0.60  | 0.59  |
| 75.60  | 1.26  | 0.93  | 0.90  | 0.83  | 0.66  | 0.57  | 0.49  | 0.44  | 0.40  | 0.50  | 0.34  |
| 80.51  | 1.38  | 1.29  | 1.12  | 1.05  | 0.84  | 0.89  | 0.96  | 0.75  | 0.80  | 0.80  | 0.68  |
| 85.77  | 1.37  | 1.30  | 1.13  | 1.12  | 1.10  | 0.91  | 0.89  | 0.73  | 0.65  | 0.64  | 0.58  |
| 91.38  | 1.24  | 1.08  | 0.97  | 0.84  | 0.76  | 0.67  | 0.64  | 0.59  | 0.57  | 0.57  | 0.48  |
| 97.39  | 1.18  | 1.00  | 0.92  | 0.74  | 0.58  | 0.57  | 0.63  | 0.51  | 0.51  | 0.46  | 0.39  |
| 103.80 | 1.29  | 1.20  | 1.02  | 0.93  | 0.78  | 0.74  | 0.77  | 0.67  | 0.69  | 0.60  | 0.60  |
| 110.66 | 1.10  | 0.85  | 0.77  | 0.69  | 0.56  | 0.52  | 0.51  | 0.46  | 0.35  | 0.32  | 0.33  |
| 117.99 | 0.74  | 0.76  | 0.54  | 0.37  | 0.32  | 0.16  | 0.18  | 0.12  | 0.12  | 0.10  | 0.08  |
| 125.83 | 1.17  | 0.97  | 0.81  | 0.75  | 0.63  | 0.65  | 0.56  | 0.56  | 0.45  | 0.48  | 0.33  |
| 134.21 | 0.94  | 0.86  | 0.77  | 0.69  | 0.42  | 0.38  | 0.43  | 0.41  | 0.30  | 0.32  | 0.17  |
| 143.17 | 0.85  | 0.72  | 0.51  | 0.46  | 0.33  | 0.31  | 0.36  | 0.23  | 0.19  | 0.28  | 0.12  |
| 152.74 | 0.81  | 0.64  | 0.59  | 0.47  | 0.38  | 0.36  | 0.29  | 0.27  | 0.17  | 0.25  | -0.03 |
| 162.97 | 0.80  | 0.74  | 0.73  | 0.45  | 0.43  | 0.25  | 0.32  | 0.31  | 0.38  | 0.33  | 0.27  |
| 173.91 | 0.60  | 0.50  | 0.46  | 0.33  | 0.16  | 0.10  | 0.18  | 0.12  | 0.09  | 0.09  | 0.00  |
| 185.60 | 0.79  | 0.60  | 0.71  | 0.52  | 0.37  | 0.31  | 0.31  | 0.25  | 0.30  | 0.26  | 0.17  |
| 198.10 | 0.57  | 0.54  | 0.55  | 0.32  | 0.24  | 0.10  | 0.17  | 0.17  | 0.02  | 0.13  | -0.01 |
| 211.46 | 0.60  | 0.47  | 0.39  | 0.24  | 0.20  | 0.10  | 0.19  | 0.13  | 0.04  | 0.16  | 0.02  |
| 225.75 | 0.60  | 0.50  | 0.44  | 0.25  | 0.22  | 0.09  | -0.01 | 0.15  | 0.18  | 0.14  | 0.13  |
| 241.01 | 0.53  | 0.48  | 0.36  | 0.20  | 0.17  | 0.15  | 0.12  | 0.10  | 0.08  | 0.08  | -0.03 |
| 257.33 | 0.38  | 0.26  | 0.21  | 0.10  | -0.02 | -0.11 | -0.08 | -0.23 | -0.15 | -0.15 | -0.10 |
| 274.77 | 0.42  | 0.37  | 0.30  | 0.21  | 0.05  | 0.06  | 0.02  | 0.07  | -0.19 | 0.04  | -0.07 |
| 293.42 | 0.36  | 0.33  | 0.18  | 0.14  | 0.05  | -0.01 | -0.08 | -0.10 | 0.01  | -0.07 | -0.12 |
| 313.35 | 0.19  | 0.03  | -0.01 | -0.12 | -0.26 | -0.18 | -0.20 | -0.32 | -0.23 | -0.31 | -0.29 |
| 334.66 | 0.52  | 0.38  | 0.29  | 0.19  | 0.02  | -0.01 | 0.09  | -0.01 | -0.04 | -0.11 | 0.06  |
| 357.43 | 0.46  | 0.32  | 0.19  | 0.11  | 0.03  | 0.05  | -0.12 | -0.17 | -0.30 | -0.13 | -0.20 |
| 381.78 | 0.21  | 0.04  | 0.02  | -0.07 | -0.26 | -0.21 | -0.24 | -0.27 | -0.26 | -0.28 | -0.48 |
| 407.80 | 0.36  | 0.28  | 0.15  | -0.06 | -0.13 | -0.15 | -0.23 | -0.16 | -0.23 | -0.24 | -0.18 |
| 435.62 | 0.19  | 0.20  | 0.05  | -0.12 | -0.24 | -0.26 | -0.22 | -0.25 | -0.39 | -0.38 | -0.33 |
| 465.35 | 0.02  | 0.10  | -0.11 | -0.16 | -0.29 | -0.28 | -0.38 | -0.56 | -0.42 | -0.46 | -0.42 |
| 497.14 | 0.04  | -0.15 | -0.09 | -0.19 | -0.32 | -0.44 | -0.32 | -0.55 | -0.49 | -0.55 | -0.50 |
| 531.11 | -0.04 | -0.25 | -0.33 | -0.25 | -0.44 | -0.47 | -0.47 | -0.52 | -0.63 | -0.57 | -0.61 |
| 567.43 | 0.07  | -0.10 | -0.02 | -0.10 | -0.33 | -0.33 | -0.29 | -0.40 | -0.40 | -0.32 | -0.42 |
| 606.26 | 0.11  | -0.04 | -0.13 | -0.16 | -0.26 | -0.31 | -0.24 | -0.34 | -0.33 | -0.23 | -0.39 |
| 647.76 | -0.05 | -0.20 | -0.32 | -0.36 | -0.52 | -0.53 | -0.42 | -0.53 | -0.45 | -0.56 | -0.46 |
| 692.12 | -0.30 | -0.35 | -0.44 | -0.56 | -0.63 | -0.68 | -0.76 | -0.87 | -0.74 | -0.83 | -0.77 |

|         |       |       |       |       |       |       |       |       |       |       |       |
|---------|-------|-------|-------|-------|-------|-------|-------|-------|-------|-------|-------|
| 739.53  | -0.11 | -0.16 | -0.25 | -0.32 | -0.43 | -0.49 | -0.56 | -0.50 | -0.62 | -0.52 | -0.60 |
| 790.22  | -0.03 | -0.17 | -0.29 | -0.42 | -0.40 | -0.66 | -0.60 | -0.56 | -0.66 | -0.65 | -0.70 |
| 844.40  | -0.04 | -0.10 | -0.29 | -0.45 | -0.54 | -0.60 | -0.66 | -0.67 | -0.70 | -0.68 | -0.75 |
| 902.32  | -0.33 | -0.25 | -0.46 | -0.37 | -0.55 | -0.55 | -0.67 | -0.61 | -0.60 | -0.59 | -0.64 |
| 964.23  | -0.24 | -0.35 | -0.47 | -0.47 | -0.59 | -0.59 | -0.63 | -0.75 | -0.77 | -0.70 | -0.81 |
| 1030.41 | -0.32 | -0.37 | -0.41 | -0.57 | -0.60 | -0.65 | -0.73 | -0.76 | -0.72 | -0.60 | -0.81 |
| 1101.15 | -0.50 | -0.65 | -0.74 | -0.77 | -0.96 | -0.87 | -0.96 | -0.91 | -0.97 | -0.90 | -1.02 |
| 1176.77 | -0.27 | -0.31 | -0.49 | -0.69 | -0.80 | -0.88 | -0.78 | -0.90 | -0.82 | -0.92 | -0.76 |
| 1257.60 | -0.40 | -0.43 | -0.57 | -0.68 | -0.61 | -0.80 | -0.74 | -0.86 | -0.79 | -0.75 | -0.80 |
| 1344.00 | -0.51 | -0.60 | -0.66 | -0.83 | -0.75 | -0.98 | -0.92 | -0.97 | -0.98 | -0.91 | -0.97 |
| 1436.36 | -0.55 | -0.75 | -0.85 | -0.94 | -1.08 | -1.09 | -1.03 | -1.11 | -1.01 | -1.02 | -1.02 |
| 1535.09 | -0.49 | -0.65 | -0.60 | -0.81 | -0.90 | -0.91 | -0.97 | -0.93 | -0.96 | -0.86 | -0.93 |
| 1640.63 | -0.52 | -0.66 | -0.79 | -0.87 | -1.02 | -0.97 | -1.08 | -1.03 | -1.11 | -1.00 | -1.13 |
| 1753.44 | -0.75 | -0.86 | -1.00 | -1.01 | -1.16 | -1.18 | -1.18 | -1.21 | -1.35 | -1.36 | -1.21 |
| 1874.02 | -0.49 | -0.62 | -0.74 | -0.81 | -0.99 | -0.94 | -0.98 | -1.04 | -1.02 | -0.96 | -0.99 |
| 2002.92 | -0.79 | -0.96 | -1.10 | -1.16 | -1.11 | -1.30 | -1.20 | -1.25 | -1.28 | -1.21 | -1.26 |
| 2140.71 | -0.93 | -0.98 | -1.07 | -1.14 | -1.22 | -1.27 | -1.31 | -1.38 | -1.43 | -1.33 | -1.28 |
| 2288.00 | -0.79 | -0.95 | -1.10 | -1.11 | -1.22 | -1.26 | -1.33 | -1.26 | -1.28 | -1.29 | -1.30 |
| 2445.44 | -0.64 | -0.85 | -0.89 | -1.06 | -1.14 | -1.15 | -1.35 | -1.29 | -1.21 | -1.24 | -1.33 |
| 2613.73 | -0.75 | -0.93 | -0.99 | -1.00 | -1.33 | -1.29 | -1.25 | -1.30 | -1.25 | -1.26 | -1.21 |
| 2793.63 | -0.83 | -0.97 | -1.06 | -1.08 | -1.12 | -1.18 | -1.18 | -1.14 | -1.14 | -1.11 | -0.96 |
| 2985.93 | -0.85 | -0.79 | -0.97 | -0.92 | -0.98 | -1.02 | -1.07 | -0.92 | -1.15 | -0.91 | -1.06 |
| 3191.49 | -0.56 | -0.57 | -0.69 | -0.85 | -0.93 | -0.94 | -0.92 | -1.03 | -1.01 | -0.99 | -0.98 |
| 3411.21 | -0.45 | -0.50 | -0.67 | -0.71 | -0.79 | -0.92 | -0.87 | -0.85 | -0.85 | -0.84 | -0.87 |
| 3646.09 | -0.21 | -0.31 | -0.33 | -0.64 | -0.58 | -0.74 | -0.77 | -0.70 | -0.80 | -0.74 | -0.77 |
| 3897.16 | -0.32 | -0.47 | -0.53 | -0.52 | -0.75 | -0.78 | -0.72 | -0.63 | -0.72 | -0.68 | -0.76 |

| Wavelength<br>h<br>(nm) | 475.07 | 476.49 | 477.92 | 479.34 | 480.7<br>7 | 482.1<br>9 | 483.6<br>1 | 485.0<br>4 | 486.4<br>6 | 487.8<br>9 | 489.3<br>1 |
|-------------------------|--------|--------|--------|--------|------------|------------|------------|------------|------------|------------|------------|
| Time<br>(ps)            |        |        |        |        |            |            |            |            |            |            |            |
| -2.74                   | -0.18  | -0.22  | -0.22  | -0.23  | -0.26      | -0.23      | -0.29      | -0.23      | -0.31      | -0.46      | -0.41      |
| -2.24                   | 0.15   | 0.12   | 0.02   | 0.16   | 0.17       | 0.15       | 0.24       | 0.08       | 0.13       | 0.04       | 0.07       |
| -1.74                   | 0.19   | 0.13   | 0.13   | 0.08   | 0.05       | 0.14       | 0.02       | 0.01       | -0.08      | 0.02       | -0.12      |
| -1.24                   | -0.04  | -0.02  | 0.03   | 0.01   | 0.01       | 0.05       | 0.03       | 0.01       | 0.07       | 0.03       | -0.01      |
| -0.74                   | -0.13  | -0.05  | -0.01  | 0.01   | -0.02      | -0.13      | 0.01       | 0.06       | 0.10       | 0.21       | 0.14       |
| -0.24                   | -0.08  | -0.01  | 0.03   | -0.08  | 0.01       | -0.13      | -0.04      | 0.02       | 0.02       | 0.06       | 0.14       |
| -0.14                   | -0.09  | -0.13  | -0.11  | -0.08  | -0.11      | -0.01      | -0.02      | -0.06      | 0.01       | 0.05       | 0.13       |
| -0.04                   | 0.18   | 0.16   | 0.13   | 0.14   | 0.14       | 0.16       | 0.06       | 0.12       | 0.07       | 0.06       | 0.05       |
| 0.06                    | -0.18  | -0.15  | -0.13  | -0.12  | -0.08      | -0.20      | -0.14      | -0.13      | -0.04      | -0.07      | -0.06      |
| 0.16                    | 0.03   | 0.12   | 0.05   | 0.04   | 0.16       | 0.11       | 0.08       | 0.17       | 0.32       | 0.27       | 0.33       |
| 0.26                    | 0.01   | -0.05  | -0.02  | 0.01   | 0.06       | 0.04       | 0.10       | 0.14       | 0.06       | 0.21       | 0.25       |
| 0.31                    | 0.11   | 0.12   | 0.17   | 0.14   | 0.24       | 0.20       | 0.21       | 0.25       | 0.27       | 0.23       | 0.23       |
| 0.36                    | -0.01  | -0.03  | -0.01  | -0.05  | -0.03      | -0.06      | -0.06      | -0.11      | -0.15      | -0.21      | -0.17      |
| 0.41                    | -0.05  | -0.01  | 0.00   | -0.05  | -0.02      | -0.03      | 0.02       | -0.03      | 0.01       | 0.01       | -0.02      |
| 0.46                    | 0.07   | -0.02  | -0.09  | -0.05  | 0.08       | -0.01      | 0.07       | 0.01       | 0.10       | 0.05       | 0.16       |
| 0.51                    | 0.10   | 0.13   | 0.08   | 0.00   | 0.05       | 0.06       | 0.11       | 0.10       | 0.01       | 0.10       | 0.19       |
| 0.56                    | -0.02  | -0.03  | -0.04  | 0.05   | 0.04       | 0.06       | 0.11       | 0.14       | 0.04       | 0.12       | 0.23       |
| 0.61                    | -0.02  | -0.08  | -0.07  | 0.00   | -0.01      | -0.10      | -0.04      | -0.09      | -0.19      | -0.14      | -0.08      |
| 0.66                    | 0.12   | 0.01   | -0.05  | -0.04  | 0.04       | 0.05       | -0.05      | 0.02       | 0.01       | -0.04      | 0.03       |
| 0.71                    | -0.08  | -0.08  | 0.03   | 0.02   | -0.05      | -0.04      | 0.02       | -0.01      | -0.02      | -0.04      | 0.09       |

|      |        |        |        |        |        |        |        |        |        |        |        |
|------|--------|--------|--------|--------|--------|--------|--------|--------|--------|--------|--------|
| 0.76 | -0.02  | -0.02  | -0.01  | -0.04  | 0.05   | -0.03  | 0.10   | 0.06   | 0.08   | 0.12   | 0.20   |
| 0.81 | -0.18  | -0.17  | -0.03  | 0.01   | 0.05   | 0.04   | 0.00   | 0.16   | 0.10   | 0.04   | 0.11   |
| 0.86 | -0.01  | -0.13  | -0.14  | -0.02  | -0.12  | -0.24  | -0.19  | -0.22  | -0.26  | -0.34  | -0.28  |
| 0.91 | -0.07  | 0.16   | -0.03  | 0.10   | 0.05   | 0.11   | 0.15   | 0.28   | 0.24   | 0.22   | 0.37   |
| 0.96 | 0.01   | -0.13  | 0.04   | 0.09   | 0.07   | 0.08   | 0.12   | 0.10   | 0.06   | -0.03  | 0.16   |
| 1.01 | 0.24   | 0.29   | 0.24   | 0.29   | 0.35   | 0.34   | 0.39   | 0.38   | 0.46   | 0.40   | 0.47   |
| 1.06 | -0.22  | -0.11  | 0.03   | 0.15   | 0.05   | 0.09   | 0.20   | -0.02  | -0.06  | 0.13   | 0.14   |
| 1.11 | -6.46  | -0.36  | 1.81   | 1.72   | 0.36   | -1.18  | -2.10  | -1.99  | -1.20  | -0.57  | -0.23  |
| 1.16 | 8.31   | -23.74 | -48.58 | -67.30 | -80.16 | -87.19 | -88.56 | -85.33 | -77.30 | -64.83 | -49.30 |
| 1.21 | 490.22 | 466.91 | 439.58 | 410.29 | 383.96 | 358.30 | 334.30 | 307.90 | 278.33 | 243.62 | 205.18 |
| 1.26 | -      | -      | -      | -      | -74.61 | -29.68 | 22.76  | 79.07  | 137.83 | 195.76 | 250.43 |
| 1.31 | 141.95 | 145.92 | 135.20 | 110.76 | 8.45   | 9.24   | 12.60  | 16.23  | 16.82  | 11.63  | -1.20  |
| 1.36 | 22.97  | 20.95  | 16.11  | 11.24  | 8.45   | 9.24   | 12.60  | 16.23  | 16.82  | 11.63  | -1.20  |
| 1.36 | 6.73   | 8.04   | 8.64   | 8.19   | 6.22   | 3.65   | 0.92   | -0.82  | -0.85  | 0.65   | 3.23   |
| 1.41 | 1.80   | -0.08  | -0.47  | 0.95   | 3.27   | 6.15   | 8.69   | 10.24  | 10.41  | 9.59   | 8.09   |
| 1.46 | 8.72   | 9.30   | 8.29   | 6.21   | 3.76   | 2.00   | 1.73   | 2.30   | 4.10   | 6.32   | 8.08   |
| 1.51 | 1.61   | 2.71   | 4.72   | 6.84   | 8.35   | 8.75   | 7.96   | 6.34   | 4.23   | 2.24   | 0.75   |
| 1.56 | 4.59   | 2.03   | 0.38   | 0.15   | 1.13   | 3.08   | 5.19   | 6.78   | 7.41   | 6.82   | 5.41   |
| 1.61 | 7.20   | 7.12   | 5.84   | 3.93   | 1.80   | 0.35   | -0.09  | 0.54   | 2.06   | 4.04   | 5.98   |
| 1.66 | 0.51   | 1.65   | 3.37   | 5.23   | 6.59   | 7.20   | 6.76   | 5.62   | 3.93   | 2.63   | 1.58   |
| 1.71 | 6.55   | 5.35   | 3.72   | 2.10   | 0.84   | 0.83   | 1.51   | 2.83   | 4.32   | 5.51   | 6.03   |
| 1.76 | 3.65   | 5.37   | 6.55   | 6.81   | 6.20   | 4.72   | 2.91   | 1.37   | 0.49   | 0.44   | 1.09   |
| 1.81 | 0.73   | -0.04  | 0.18   | 1.23   | 2.57   | 3.88   | 4.70   | 4.83   | 4.29   | 3.25   | 2.10   |
| 1.86 | 4.42   | 3.30   | 2.01   | 1.05   | 0.64   | 0.89   | 1.85   | 3.06   | 4.21   | 5.05   | 5.32   |
| 1.91 | 1.37   | 2.86   | 4.33   | 5.35   | 5.60   | 4.95   | 3.64   | 2.28   | 1.05   | 0.37   | 0.28   |
| 1.96 | 3.02   | 1.54   | 0.66   | 0.58   | 1.03   | 2.08   | 3.19   | 4.14   | 4.37   | 4.15   | 3.36   |
| 2.01 | 4.43   | 5.13   | 4.95   | 3.91   | 2.40   | 0.92   | -0.02  | -0.28  | 0.40   | 1.69   | 3.21   |
| 2.06 | 0.36   | 0.68   | 1.51   | 2.71   | 3.70   | 4.45   | 4.49   | 4.04   | 3.17   | 2.22   | 1.39   |
| 2.11 | 3.19   | 2.22   | 1.15   | 0.90   | 1.07   | 1.63   | 2.45   | 3.24   | 3.67   | 3.78   | 3.44   |
| 2.16 | 2.91   | 3.93   | 4.46   | 4.19   | 3.55   | 2.42   | 1.36   | 0.72   | 0.39   | 0.69   | 1.49   |
| 2.21 | 1.04   | 0.44   | 0.76   | 1.55   | 2.73   | 3.71   | 4.20   | 4.42   | 3.83   | 2.99   | 2.11   |
| 2.26 | 4.33   | 4.11   | 3.16   | 2.23   | 1.30   | 0.79   | 0.89   | 1.54   | 2.43   | 3.27   | 4.00   |
| 2.31 | 1.14   | 1.94   | 2.61   | 3.23   | 3.50   | 3.21   | 2.60   | 1.88   | 1.14   | 0.75   | 0.63   |
| 2.36 | 1.20   | 1.17   | 1.18   | 1.63   | 2.18   | 2.56   | 2.59   | 2.62   | 2.25   | 1.86   | 1.44   |
| 2.41 | 3.65   | 3.67   | 2.96   | 2.06   | 1.17   | 0.50   | 0.49   | 0.93   | 1.64   | 2.49   | 3.28   |
| 2.46 | 0.73   | 0.94   | 1.62   | 2.44   | 3.08   | 3.43   | 3.32   | 2.76   | 2.07   | 1.30   | 0.86   |
| 2.51 | 4.17   | 3.18   | 2.09   | 1.21   | 0.52   | 0.70   | 1.11   | 2.00   | 2.93   | 3.61   | 3.82   |
| 2.56 | 2.37   | 2.83   | 3.04   | 2.94   | 2.39   | 1.90   | 1.33   | 1.04   | 1.13   | 1.38   | 1.87   |
| 2.61 | 0.93   | 1.25   | 1.90   | 2.54   | 2.85   | 3.08   | 2.72   | 2.28   | 1.78   | 1.21   | 1.14   |
| 2.66 | 2.98   | 2.51   | 1.79   | 1.24   | 0.95   | 1.24   | 1.57   | 2.17   | 2.81   | 3.08   | 3.24   |
| 2.71 | 1.79   | 2.37   | 2.88   | 2.98   | 2.73   | 2.29   | 1.73   | 1.21   | 0.85   | 0.98   | 1.31   |
| 2.76 | 1.80   | 1.29   | 1.16   | 1.31   | 1.74   | 2.31   | 2.88   | 3.10   | 3.08   | 2.77   | 2.34   |
| 2.81 | 2.72   | 2.59   | 2.26   | 1.73   | 1.20   | 0.81   | 0.97   | 1.24   | 1.54   | 2.00   | 2.52   |
| 2.86 | 1.17   | 1.70   | 2.03   | 2.31   | 2.14   | 1.97   | 1.57   | 1.08   | 0.90   | 0.74   | 0.93   |
| 2.91 | 2.24   | 1.62   | 1.16   | 0.99   | 1.08   | 1.32   | 1.96   | 2.28   | 2.67   | 2.66   | 2.45   |
| 2.96 | 2.49   | 2.78   | 2.72   | 2.32   | 1.92   | 1.51   | 1.14   | 1.05   | 1.17   | 1.54   | 1.99   |
| 3.01 | 1.40   | 1.14   | 1.20   | 1.54   | 2.01   | 2.40   | 2.53   | 2.45   | 2.38   | 1.89   | 1.50   |
| 3.06 | 2.54   | 2.16   | 1.56   | 1.18   | 0.94   | 0.88   | 1.06   | 1.36   | 1.74   | 2.05   | 2.14   |
| 3.11 | 1.83   | 2.10   | 2.20   | 2.15   | 1.94   | 1.56   | 1.34   | 1.13   | 0.96   | 1.09   | 1.39   |
| 3.16 | 1.33   | 1.04   | 0.87   | 1.23   | 1.54   | 1.96   | 2.24   | 2.29   | 2.27   | 1.95   | 1.61   |

|      |      |      |      |      |      |      |      |      |      |      |      |
|------|------|------|------|------|------|------|------|------|------|------|------|
| 3.21 | 2.37 | 2.21 | 1.83 | 1.59 | 1.41 | 1.41 | 1.49 | 1.74 | 1.95 | 2.13 | 2.26 |
| 3.26 | 1.60 | 1.79 | 2.03 | 2.28 | 2.39 | 2.23 | 2.05 | 1.84 | 1.51 | 1.52 | 1.46 |
| 3.31 | 2.03 | 1.67 | 1.45 | 1.52 | 1.66 | 1.89 | 2.12 | 2.40 | 2.46 | 2.45 | 2.22 |
| 3.36 | 2.61 | 2.56 | 2.40 | 2.17 | 1.86 | 1.60 | 1.53 | 1.63 | 1.69 | 2.02 | 2.19 |
| 3.41 | 1.36 | 1.49 | 1.81 | 2.08 | 2.29 | 2.35 | 2.18 | 2.02 | 1.66 | 1.46 | 1.39 |
| 3.46 | 2.01 | 1.63 | 1.41 | 1.22 | 1.28 | 1.45 | 1.68 | 2.03 | 2.28 | 2.41 | 2.34 |
| 3.51 | 1.84 | 2.20 | 2.39 | 2.35 | 2.24 | 2.01 | 1.64 | 1.47 | 1.43 | 1.43 | 1.53 |
| 3.56 | 1.49 | 1.31 | 1.32 | 1.54 | 1.89 | 2.14 | 2.19 | 2.11 | 1.98 | 1.79 | 1.66 |
| 3.61 | 2.00 | 1.84 | 1.60 | 1.39 | 1.40 | 1.39 | 1.45 | 1.57 | 1.70 | 1.82 | 1.81 |
| 3.66 | 1.30 | 1.54 | 1.81 | 2.03 | 2.05 | 1.87 | 1.63 | 1.30 | 1.18 | 1.06 | 1.19 |
| 3.71 | 2.25 | 1.87 | 1.67 | 1.72 | 1.78 | 1.92 | 2.18 | 2.50 | 2.46 | 2.43 | 2.36 |
| 3.76 | 2.29 | 2.26 | 2.18 | 2.02 | 1.76 | 1.76 | 1.69 | 1.81 | 1.82 | 1.95 | 2.21 |
| 3.81 | 1.31 | 1.50 | 1.65 | 1.76 | 1.84 | 1.88 | 1.67 | 1.54 | 1.38 | 1.22 | 1.19 |
| 3.86 | 1.51 | 1.35 | 1.11 | 1.11 | 1.10 | 1.19 | 1.28 | 1.43 | 1.53 | 1.51 | 1.36 |
| 3.91 | 1.75 | 1.91 | 1.92 | 2.01 | 1.79 | 1.65 | 1.47 | 1.35 | 1.25 | 1.36 | 1.46 |
| 3.96 | 1.43 | 1.40 | 1.49 | 1.64 | 1.80 | 1.98 | 1.88 | 1.96 | 1.83 | 1.60 | 1.46 |
| 4.01 | 2.35 | 2.25 | 1.86 | 1.75 | 1.67 | 1.61 | 1.65 | 1.97 | 2.08 | 2.31 | 2.45 |
| 4.06 | 1.78 | 1.87 | 1.96 | 1.89 | 1.91 | 1.79 | 1.79 | 1.66 | 1.52 | 1.49 | 1.68 |
| 4.11 | 1.27 | 1.25 | 1.18 | 1.13 | 1.27 | 1.54 | 1.62 | 1.56 | 1.52 | 1.41 | 1.27 |
| 4.16 | 2.12 | 2.07 | 1.95 | 1.67 | 1.69 | 1.46 | 1.46 | 1.48 | 1.66 | 1.89 | 2.04 |
| 4.21 | 1.46 | 1.48 | 1.59 | 1.80 | 1.83 | 1.99 | 1.90 | 1.83 | 1.70 | 1.57 | 1.55 |
| 4.26 | 1.84 | 1.61 | 1.48 | 1.44 | 1.42 | 1.38 | 1.61 | 1.76 | 1.76 | 1.90 | 1.93 |
| 4.31 | 1.65 | 1.76 | 1.75 | 1.58 | 1.56 | 1.42 | 1.18 | 1.30 | 1.21 | 1.26 | 1.36 |
| 4.36 | 1.41 | 1.45 | 1.58 | 1.59 | 1.59 | 1.58 | 1.48 | 1.40 | 1.32 | 1.18 | 1.19 |
| 4.41 | 1.56 | 1.40 | 1.26 | 1.17 | 1.01 | 1.12 | 1.12 | 1.30 | 1.46 | 1.51 | 1.56 |
| 4.46 | 1.99 | 2.07 | 2.01 | 2.11 | 1.96 | 1.86 | 1.82 | 1.65 | 1.58 | 1.69 | 1.72 |
| 4.51 | 1.85 | 1.64 | 1.49 | 1.62 | 1.65 | 1.64 | 1.72 | 1.79 | 1.75 | 1.69 | 1.60 |
| 4.56 | 1.78 | 1.73 | 1.54 | 1.49 | 1.27 | 1.33 | 1.43 | 1.31 | 1.39 | 1.55 | 1.52 |
| 4.61 | 1.29 | 1.32 | 1.27 | 1.33 | 1.28 | 1.08 | 0.89 | 0.92 | 0.90 | 0.87 | 0.93 |
| 4.66 | 1.51 | 1.38 | 1.36 | 1.34 | 1.34 | 1.52 | 1.55 | 1.77 | 1.63 | 1.70 | 1.67 |
| 4.71 | 1.97 | 1.99 | 1.88 | 1.85 | 1.76 | 1.66 | 1.69 | 1.64 | 1.62 | 1.85 | 1.84 |
| 4.76 | 1.76 | 1.83 | 1.88 | 1.94 | 2.04 | 2.03 | 1.90 | 1.88 | 1.81 | 1.78 | 1.75 |
| 4.81 | 1.75 | 1.46 | 1.44 | 1.36 | 1.27 | 1.39 | 1.34 | 1.37 | 1.49 | 1.54 | 1.50 |
| 4.86 | 1.48 | 1.44 | 1.43 | 1.33 | 1.29 | 1.20 | 1.06 | 1.14 | 1.01 | 0.95 | 1.02 |
| 4.91 | 1.65 | 1.54 | 1.63 | 1.65 | 1.63 | 1.77 | 1.76 | 1.71 | 1.68 | 1.69 | 1.60 |
| 4.96 | 1.74 | 1.77 | 1.64 | 1.45 | 1.40 | 1.39 | 1.38 | 1.45 | 1.41 | 1.56 | 1.66 |
| 5.01 | 1.63 | 1.65 | 1.76 | 1.78 | 1.70 | 1.79 | 1.58 | 1.53 | 1.44 | 1.41 | 1.52 |
| 5.06 | 1.64 | 1.67 | 1.51 | 1.51 | 1.46 | 1.47 | 1.44 | 1.47 | 1.47 | 1.43 | 1.39 |
| 5.11 | 1.60 | 1.54 | 1.54 | 1.35 | 1.30 | 1.31 | 1.24 | 1.35 | 1.29 | 1.33 | 1.44 |
| 5.16 | 1.28 | 1.41 | 1.45 | 1.43 | 1.39 | 1.43 | 1.46 | 1.40 | 1.32 | 1.28 | 1.29 |
| 5.21 | 1.40 | 1.21 | 1.22 | 1.30 | 1.20 | 1.28 | 1.24 | 1.26 | 1.23 | 1.18 | 1.16 |
| 5.26 | 1.73 | 1.78 | 1.84 | 1.86 | 1.74 | 1.69 | 1.68 | 1.61 | 1.55 | 1.61 | 1.67 |
| 5.31 | 1.50 | 1.46 | 1.34 | 1.44 | 1.51 | 1.47 | 1.45 | 1.44 | 1.32 | 1.30 | 1.38 |
| 5.38 | 1.29 | 1.33 | 1.29 | 1.37 | 1.29 | 1.36 | 1.29 | 1.14 | 1.18 | 1.06 | 0.98 |
| 5.45 | 1.47 | 1.46 | 1.60 | 1.60 | 1.61 | 1.64 | 1.61 | 1.48 | 1.49 | 1.40 | 1.49 |
| 5.53 | 1.61 | 1.39 | 1.49 | 1.53 | 1.60 | 1.60 | 1.52 | 1.53 | 1.39 | 1.33 | 1.25 |
| 5.61 | 1.82 | 1.64 | 1.69 | 1.50 | 1.46 | 1.54 | 1.45 | 1.47 | 1.42 | 1.61 | 1.55 |
| 5.70 | 1.50 | 1.44 | 1.44 | 1.54 | 1.41 | 1.40 | 1.39 | 1.36 | 1.24 | 1.19 | 1.12 |
| 5.80 | 1.61 | 1.61 | 1.50 | 1.50 | 1.32 | 1.39 | 1.34 | 1.31 | 1.27 | 1.27 | 1.27 |
| 5.90 | 1.55 | 1.43 | 1.45 | 1.43 | 1.34 | 1.40 | 1.34 | 1.40 | 1.35 | 1.51 | 1.36 |

|       |      |      |      |      |      |      |      |      |      |      |      |
|-------|------|------|------|------|------|------|------|------|------|------|------|
| 6.01  | 1.73 | 1.74 | 1.78 | 1.65 | 1.63 | 1.65 | 1.73 | 1.62 | 1.69 | 1.69 | 1.73 |
| 6.13  | 1.42 | 1.50 | 1.41 | 1.50 | 1.34 | 1.33 | 1.48 | 1.43 | 1.32 | 1.41 | 1.36 |
| 6.25  | 1.15 | 1.26 | 1.14 | 1.16 | 1.24 | 1.14 | 1.12 | 1.25 | 1.17 | 1.23 | 1.36 |
| 6.39  | 1.31 | 1.19 | 1.20 | 1.22 | 1.27 | 1.18 | 1.29 | 1.34 | 1.35 | 1.41 | 1.49 |
| 6.53  | 1.38 | 1.34 | 1.26 | 1.23 | 1.19 | 1.20 | 1.27 | 1.35 | 1.35 | 1.53 | 1.67 |
| 6.69  | 1.57 | 1.42 | 1.46 | 1.40 | 1.50 | 1.54 | 1.53 | 1.58 | 1.69 | 1.63 | 1.81 |
| 6.85  | 1.23 | 1.24 | 1.22 | 1.26 | 1.23 | 1.24 | 1.27 | 1.28 | 1.38 | 1.39 | 1.43 |
| 7.03  | 1.35 | 1.30 | 1.28 | 1.24 | 1.19 | 1.27 | 1.30 | 1.35 | 1.42 | 1.42 | 1.44 |
| 7.21  | 1.42 | 1.28 | 1.24 | 1.35 | 1.40 | 1.45 | 1.37 | 1.45 | 1.51 | 1.71 | 1.69 |
| 7.41  | 1.39 | 1.38 | 1.41 | 1.37 | 1.42 | 1.36 | 1.44 | 1.45 | 1.58 | 1.68 | 1.75 |
| 7.63  | 1.64 | 1.60 | 1.51 | 1.59 | 1.60 | 1.66 | 1.64 | 1.69 | 1.69 | 1.70 | 1.75 |
| 7.86  | 1.30 | 1.36 | 1.28 | 1.30 | 1.37 | 1.32 | 1.44 | 1.49 | 1.50 | 1.54 | 1.65 |
| 8.10  | 1.35 | 1.27 | 1.13 | 1.21 | 1.25 | 1.24 | 1.26 | 1.21 | 1.25 | 1.33 | 1.39 |
| 8.36  | 0.91 | 0.97 | 0.92 | 0.93 | 1.07 | 1.00 | 0.97 | 1.07 | 1.04 | 1.12 | 1.31 |
| 8.64  | 1.38 | 1.26 | 1.20 | 1.10 | 1.31 | 1.23 | 1.33 | 1.30 | 1.38 | 1.48 | 1.67 |
| 8.94  | 1.39 | 1.37 | 1.36 | 1.32 | 1.35 | 1.39 | 1.55 | 1.51 | 1.53 | 1.67 | 1.71 |
| 9.26  | 1.47 | 1.43 | 1.44 | 1.48 | 1.52 | 1.47 | 1.59 | 1.57 | 1.69 | 1.74 | 1.79 |
| 9.60  | 1.25 | 1.22 | 1.21 | 1.23 | 1.29 | 1.22 | 1.28 | 1.37 | 1.35 | 1.40 | 1.51 |
| 9.97  | 1.36 | 1.40 | 1.23 | 1.32 | 1.36 | 1.35 | 1.29 | 1.43 | 1.40 | 1.40 | 1.52 |
| 10.36 | 1.46 | 1.32 | 1.34 | 1.32 | 1.34 | 1.40 | 1.49 | 1.45 | 1.62 | 1.63 | 1.77 |
| 10.77 | 1.28 | 1.43 | 1.36 | 1.33 | 1.40 | 1.33 | 1.48 | 1.54 | 1.42 | 1.51 | 1.63 |
| 11.22 | 1.24 | 1.20 | 1.19 | 1.30 | 1.27 | 1.38 | 1.34 | 1.48 | 1.56 | 1.57 | 1.69 |
| 11.70 | 1.28 | 1.26 | 1.21 | 1.22 | 1.37 | 1.38 | 1.35 | 1.46 | 1.51 | 1.63 | 1.67 |
| 12.21 | 1.18 | 1.15 | 1.22 | 1.14 | 1.10 | 1.25 | 1.29 | 1.29 | 1.27 | 1.29 | 1.41 |
| 12.75 | 1.33 | 1.29 | 1.25 | 1.30 | 1.33 | 1.35 | 1.36 | 1.43 | 1.42 | 1.46 | 1.62 |
| 13.33 | 1.35 | 1.41 | 1.45 | 1.51 | 1.45 | 1.53 | 1.56 | 1.65 | 1.60 | 1.67 | 1.72 |
| 13.95 | 1.34 | 1.18 | 1.26 | 1.34 | 1.30 | 1.41 | 1.38 | 1.38 | 1.43 | 1.56 | 1.58 |
| 14.62 | 1.13 | 1.17 | 1.06 | 1.10 | 1.12 | 1.27 | 1.19 | 1.21 | 1.34 | 1.28 | 1.37 |
| 15.33 | 0.88 | 0.91 | 0.84 | 0.86 | 0.86 | 0.93 | 0.98 | 1.03 | 1.01 | 1.13 | 1.27 |
| 16.09 | 1.20 | 1.05 | 1.05 | 1.04 | 1.07 | 1.11 | 1.03 | 1.14 | 1.15 | 1.21 | 1.31 |
| 16.90 | 1.16 | 1.12 | 1.16 | 1.15 | 1.19 | 1.20 | 1.13 | 1.21 | 1.16 | 1.32 | 1.38 |
| 17.77 | 1.09 | 1.11 | 1.12 | 1.26 | 1.19 | 1.23 | 1.33 | 1.36 | 1.32 | 1.31 | 1.54 |
| 18.70 | 0.84 | 0.91 | 0.87 | 0.89 | 0.84 | 1.01 | 1.01 | 1.07 | 1.16 | 1.24 | 1.26 |
| 19.69 | 1.09 | 1.17 | 1.09 | 1.20 | 1.17 | 1.17 | 1.20 | 1.25 | 1.26 | 1.27 | 1.33 |
| 20.75 | 0.90 | 0.88 | 0.96 | 1.03 | 1.00 | 1.00 | 0.93 | 1.10 | 1.13 | 1.14 | 1.17 |
| 21.89 | 1.25 | 1.01 | 1.06 | 1.20 | 1.32 | 1.27 | 1.36 | 1.45 | 1.45 | 1.55 | 1.63 |
| 23.10 | 1.35 | 1.22 | 1.38 | 1.41 | 1.33 | 1.50 | 1.48 | 1.61 | 1.66 | 1.75 | 1.82 |
| 24.39 | 1.00 | 1.06 | 1.15 | 1.06 | 1.13 | 1.17 | 1.28 | 1.30 | 1.40 | 1.37 | 1.42 |
| 25.78 | 1.14 | 1.10 | 1.06 | 1.13 | 1.17 | 1.24 | 1.27 | 1.31 | 1.28 | 1.30 | 1.38 |
| 27.26 | 0.92 | 0.86 | 0.98 | 1.08 | 0.97 | 1.09 | 1.15 | 1.17 | 1.28 | 1.30 | 1.36 |
| 28.84 | 1.20 | 1.11 | 1.14 | 1.18 | 1.18 | 1.27 | 1.29 | 1.34 | 1.41 | 1.46 | 1.41 |
| 30.53 | 1.12 | 1.12 | 1.04 | 1.06 | 1.17 | 1.18 | 1.13 | 1.25 | 1.30 | 1.30 | 1.53 |
| 32.34 | 0.88 | 0.98 | 0.94 | 0.99 | 1.01 | 1.02 | 1.04 | 1.07 | 1.10 | 1.08 | 1.24 |
| 34.27 | 1.16 | 1.11 | 1.05 | 1.16 | 1.27 | 1.27 | 1.29 | 1.33 | 1.40 | 1.41 | 1.47 |
| 36.34 | 0.73 | 0.78 | 0.80 | 0.73 | 0.77 | 0.78 | 0.76 | 1.04 | 1.04 | 1.09 | 1.20 |
| 38.55 | 1.14 | 1.25 | 1.28 | 1.31 | 1.34 | 1.31 | 1.41 | 1.47 | 1.47 | 1.52 | 1.60 |
| 40.91 | 0.84 | 0.95 | 0.90 | 1.00 | 1.05 | 1.01 | 1.04 | 1.14 | 1.26 | 1.30 | 1.38 |
| 43.43 | 0.86 | 0.92 | 0.97 | 0.92 | 0.89 | 1.06 | 1.00 | 1.04 | 1.16 | 1.07 | 1.28 |
| 46.13 | 0.74 | 0.74 | 0.75 | 0.83 | 0.87 | 0.83 | 0.80 | 0.99 | 1.01 | 1.16 | 1.20 |
| 49.01 | 0.87 | 0.88 | 0.95 | 0.89 | 1.02 | 1.00 | 0.96 | 1.05 | 1.18 | 1.23 | 1.28 |

|         |       |       |       |       |       |       |       |       |       |       |       |
|---------|-------|-------|-------|-------|-------|-------|-------|-------|-------|-------|-------|
| 52.09   | 0.64  | 0.81  | 0.62  | 0.79  | 0.82  | 0.77  | 0.80  | 0.94  | 0.89  | 0.87  | 0.99  |
| 55.39   | 0.70  | 0.69  | 0.76  | 0.75  | 0.84  | 0.83  | 0.86  | 0.77  | 0.92  | 0.98  | 1.03  |
| 58.91   | 0.57  | 0.60  | 0.68  | 0.78  | 0.69  | 0.72  | 0.70  | 0.72  | 0.69  | 0.80  | 0.95  |
| 62.68   | 0.61  | 0.65  | 0.55  | 0.57  | 0.62  | 0.59  | 0.51  | 0.61  | 0.55  | 0.66  | 0.75  |
| 66.70   | 0.56  | 0.53  | 0.49  | 0.63  | 0.66  | 0.69  | 0.56  | 0.75  | 0.74  | 0.82  | 0.97  |
| 71.00   | 0.61  | 0.48  | 0.54  | 0.51  | 0.51  | 0.51  | 0.58  | 0.54  | 0.67  | 0.66  | 0.82  |
| 75.60   | 0.33  | 0.33  | 0.34  | 0.26  | 0.40  | 0.36  | 0.42  | 0.47  | 0.40  | 0.50  | 0.60  |
| 80.51   | 0.78  | 0.83  | 0.68  | 0.80  | 0.77  | 0.86  | 0.79  | 0.82  | 0.86  | 0.93  | 1.04  |
| 85.77   | 0.56  | 0.53  | 0.46  | 0.52  | 0.42  | 0.47  | 0.35  | 0.36  | 0.43  | 0.44  | 0.50  |
| 91.38   | 0.61  | 0.63  | 0.56  | 0.57  | 0.60  | 0.64  | 0.61  | 0.64  | 0.56  | 0.70  | 0.87  |
| 97.39   | 0.28  | 0.46  | 0.32  | 0.34  | 0.24  | 0.30  | 0.41  | 0.44  | 0.37  | 0.40  | 0.48  |
| 103.80  | 0.51  | 0.48  | 0.41  | 0.54  | 0.46  | 0.44  | 0.49  | 0.48  | 0.42  | 0.53  | 0.49  |
| 110.66  | 0.29  | 0.32  | 0.25  | 0.30  | 0.24  | 0.24  | 0.26  | 0.31  | 0.42  | 0.43  | 0.65  |
| 117.99  | 0.05  | 0.01  | -0.04 | -0.04 | 0.01  | -0.15 | -0.09 | -0.04 | -0.02 | 0.10  | 0.17  |
| 125.83  | 0.33  | 0.45  | 0.35  | 0.47  | 0.33  | 0.19  | 0.34  | 0.39  | 0.35  | 0.46  | 0.59  |
| 134.21  | 0.16  | 0.17  | 0.14  | 0.20  | 0.10  | 0.03  | 0.03  | 0.06  | 0.02  | 0.12  | 0.20  |
| 143.17  | 0.04  | 0.04  | 0.03  | -0.01 | -0.04 | -0.17 | -0.07 | -0.12 | 0.06  | 0.09  | 0.09  |
| 152.74  | 0.19  | 0.14  | 0.11  | 0.17  | 0.16  | 0.21  | 0.17  | 0.14  | 0.14  | 0.34  | 0.48  |
| 162.97  | 0.22  | 0.40  | 0.41  | 0.40  | 0.46  | 0.53  | 0.64  | 0.56  | 0.71  | 0.69  | 0.75  |
| 173.91  | 0.10  | 0.06  | 0.03  | 0.16  | 0.25  | 0.24  | 0.26  | 0.30  | 0.36  | 0.30  | 0.43  |
| 185.60  | 0.26  | 0.35  | 0.32  | 0.46  | 0.50  | 0.58  | 0.61  | 0.66  | 0.62  | 0.64  | 0.68  |
| 198.10  | 0.08  | 0.05  | 0.20  | 0.28  | 0.28  | 0.23  | 0.33  | 0.33  | 0.30  | 0.30  | 0.36  |
| 211.46  | 0.09  | 0.09  | 0.13  | 0.27  | 0.31  | 0.33  | 0.42  | 0.51  | 0.62  | 0.70  | 0.75  |
| 225.75  | 0.04  | 0.12  | 0.15  | 0.18  | 0.31  | 0.27  | 0.34  | 0.48  | 0.50  | 0.53  | 0.56  |
| 241.01  | 0.07  | 0.24  | 0.13  | 0.12  | 0.26  | 0.31  | 0.34  | 0.40  | 0.34  | 0.38  | 0.44  |
| 257.33  | -0.23 | -0.09 | -0.08 | 0.00  | 0.10  | 0.10  | 0.21  | 0.14  | 0.23  | 0.18  | 0.29  |
| 274.77  | 0.07  | 0.05  | -0.04 | 0.10  | 0.17  | 0.20  | 0.23  | 0.27  | 0.34  | 0.34  | 0.47  |
| 293.42  | -0.11 | -0.08 | -0.09 | 0.09  | 0.18  | 0.25  | 0.34  | 0.36  | 0.47  | 0.36  | 0.36  |
| 313.35  | -0.24 | -0.18 | -0.20 | -0.03 | 0.00  | 0.02  | 0.20  | 0.18  | 0.15  | 0.23  | 0.34  |
| 334.66  | -0.04 | -0.03 | 0.10  | 0.13  | 0.18  | 0.18  | 0.34  | 0.33  | 0.47  | 0.53  | 0.55  |
| 357.43  | -0.14 | -0.23 | -0.16 | -0.01 | -0.02 | 0.05  | 0.04  | 0.14  | 0.09  | 0.08  | 0.24  |
| 381.78  | -0.19 | -0.23 | -0.10 | -0.09 | -0.02 | 0.12  | 0.06  | 0.31  | 0.25  | 0.30  | 0.41  |
| 407.80  | -0.27 | -0.28 | -0.20 | -0.11 | -0.01 | 0.06  | 0.21  | 0.14  | 0.29  | 0.22  | 0.28  |
| 435.62  | -0.34 | -0.31 | -0.17 | -0.02 | -0.05 | 0.12  | 0.11  | 0.16  | 0.23  | 0.26  | 0.32  |
| 465.35  | -0.42 | -0.21 | -0.35 | -0.21 | -0.24 | -0.06 | 0.01  | 0.12  | 0.03  | 0.21  | 0.22  |
| 497.14  | -0.41 | -0.30 | -0.35 | -0.32 | -0.14 | -0.22 | -0.14 | -0.09 | -0.15 | -0.14 | 0.00  |
| 531.11  | -0.54 | -0.49 | -0.43 | -0.29 | -0.26 | -0.19 | -0.18 | -0.21 | -0.08 | -0.18 | -0.13 |
| 567.43  | -0.35 | -0.26 | -0.30 | -0.13 | -0.10 | -0.02 | -0.07 | 0.07  | 0.06  | 0.17  | 0.19  |
| 606.26  | -0.32 | -0.27 | -0.32 | -0.19 | -0.13 | -0.17 | 0.00  | -0.08 | -0.02 | -0.03 | 0.05  |
| 647.76  | -0.47 | -0.41 | -0.35 | -0.34 | -0.20 | -0.13 | -0.09 | 0.06  | 0.05  | 0.06  | 0.03  |
| 692.12  | -0.84 | -0.72 | -0.63 | -0.63 | -0.53 | -0.49 | -0.39 | -0.36 | -0.24 | -0.24 | -0.16 |
| 739.53  | -0.56 | -0.45 | -0.46 | -0.34 | -0.29 | -0.25 | -0.08 | 0.07  | 0.00  | 0.15  | 0.16  |
| 790.22  | -0.62 | -0.58 | -0.66 | -0.55 | -0.53 | -0.50 | -0.38 | -0.38 | -0.37 | -0.34 | -0.37 |
| 844.40  | -0.73 | -0.60 | -0.69 | -0.62 | -0.57 | -0.43 | -0.38 | -0.42 | -0.40 | -0.34 | -0.19 |
| 902.32  | -0.65 | -0.66 | -0.54 | -0.47 | -0.45 | -0.31 | -0.23 | -0.12 | -0.08 | -0.02 | 0.00  |
| 964.23  | -0.67 | -0.69 | -0.55 | -0.67 | -0.49 | -0.42 | -0.38 | -0.37 | -0.43 | -0.40 | -0.32 |
| 1030.41 | -0.69 | -0.61 | -0.56 | -0.43 | -0.30 | -0.22 | -0.09 | 0.01  | 0.11  | 0.18  | 0.31  |
| 1101.15 | -0.92 | -0.88 | -0.79 | -0.69 | -0.51 | -0.48 | -0.43 | -0.31 | -0.18 | -0.19 | -0.14 |
| 1176.77 | -0.66 | -0.68 | -0.66 | -0.49 | -0.29 | -0.24 | -0.17 | 0.06  | 0.04  | 0.10  | 0.29  |
| 1257.60 | -0.72 | -0.67 | -0.57 | -0.53 | -0.45 | -0.41 | -0.17 | -0.07 | 0.01  | 0.00  | 0.06  |

|         |       |       |       |       |       |       |       |       |       |       |       |
|---------|-------|-------|-------|-------|-------|-------|-------|-------|-------|-------|-------|
| 1344.00 | -0.88 | -0.84 | -0.87 | -0.65 | -0.65 | -0.49 | -0.44 | -0.41 | -0.20 | -0.31 | -0.20 |
| 1436.36 | -1.04 | -0.98 | -0.96 | -0.84 | -0.71 | -0.61 | -0.50 | -0.29 | -0.23 | -0.18 | -0.06 |
| 1535.09 | -0.80 | -0.82 | -0.73 | -0.64 | -0.49 | -0.43 | -0.35 | -0.11 | -0.22 | -0.05 | -0.06 |
| 1640.63 | -1.08 | -0.98 | -0.92 | -0.83 | -0.76 | -0.76 | -0.51 | -0.54 | -0.40 | -0.42 | -0.36 |
| 1753.44 | -1.14 | -1.08 | -0.97 | -0.96 | -0.75 | -0.67 | -0.61 | -0.42 | -0.28 | -0.21 | -0.17 |
| 1874.02 | -0.97 | -0.96 | -0.88 | -0.86 | -0.78 | -0.58 | -0.54 | -0.44 | -0.33 | -0.36 | -0.33 |
| 2002.92 | -1.15 | -1.04 | -1.08 | -0.99 | -0.67 | -0.71 | -0.54 | -0.38 | -0.28 | -0.18 | -0.16 |
| 2140.71 | -1.25 | -1.15 | -1.13 | -0.94 | -0.99 | -0.80 | -0.70 | -0.57 | -0.55 | -0.44 | -0.40 |
| 2288.00 | -1.04 | -1.10 | -1.01 | -0.94 | -0.76 | -0.67 | -0.53 | -0.48 | -0.38 | -0.36 | -0.30 |
| 2445.44 | -1.21 | -1.19 | -1.07 | -0.99 | -0.91 | -0.77 | -0.71 | -0.64 | -0.56 | -0.56 | -0.46 |
| 2613.73 | -1.18 | -1.09 | -1.11 | -0.94 | -0.83 | -0.72 | -0.64 | -0.43 | -0.44 | -0.31 | -0.29 |
| 2793.63 | -1.06 | -0.98 | -0.89 | -0.69 | -0.58 | -0.45 | -0.33 | -0.19 | -0.08 | -0.11 | -0.03 |
| 2985.93 | -0.93 | -0.73 | -0.70 | -0.63 | -0.49 | -0.29 | -0.25 | -0.16 | -0.16 | -0.24 | -0.20 |
| 3191.49 | -0.88 | -0.83 | -0.68 | -0.67 | -0.58 | -0.43 | -0.27 | -0.19 | -0.17 | -0.05 | -0.15 |
| 3411.21 | -0.78 | -0.71 | -0.64 | -0.45 | -0.28 | -0.17 | -0.07 | 0.05  | 0.10  | -0.04 | 0.06  |
| 3646.09 | -0.73 | -0.70 | -0.53 | -0.41 | -0.39 | -0.18 | -0.07 | 0.00  | 0.02  | -0.09 | 0.02  |
| 3897.16 | -0.56 | -0.57 | -0.53 | -0.29 | -0.21 | -0.08 | 0.10  | 0.16  | 0.10  | 0.18  | 0.09  |

| Wavelength<br>h<br>(nm) | 490.7<br>4 | 492.1<br>6 | 493.5<br>8 | 495.01 | 496.43 | 497.86 | 499.28 | 500.70 | 502.13 | 503.55 | 504.9<br>8 |
|-------------------------|------------|------------|------------|--------|--------|--------|--------|--------|--------|--------|------------|
| -2.74                   | -0.46      | -0.54      | -0.49      | -0.58  | -0.57  | -0.58  | -0.49  | -0.49  | -0.41  | -0.42  | -0.38      |
| -2.24                   | -0.08      | -0.05      | -0.06      | -0.08  | -0.15  | -0.06  | -0.06  | -0.05  | -0.07  | -0.03  | -0.08      |
| -1.74                   | -0.14      | -0.26      | -0.23      | -0.30  | -0.35  | -0.28  | -0.28  | -0.26  | -0.36  | -0.25  | -0.32      |
| -1.24                   | 0.05       | 0.22       | 0.19       | 0.14   | 0.17   | 0.16   | 0.21   | 0.09   | 0.15   | 0.01   | 0.01       |
| -0.74                   | 0.19       | 0.24       | 0.22       | 0.28   | 0.38   | 0.26   | 0.22   | 0.32   | 0.27   | 0.26   | 0.31       |
| -0.24                   | 0.17       | 0.14       | 0.08       | 0.19   | 0.08   | 0.06   | -0.03  | 0.10   | 0.12   | 0.09   | 0.05       |
| -0.14                   | 0.27       | 0.29       | 0.28       | 0.35   | 0.32   | 0.29   | 0.31   | 0.23   | 0.19   | 0.23   | 0.30       |
| -0.04                   | 0.01       | -0.05      | 0.00       | 0.00   | 0.11   | 0.13   | 0.12   | 0.07   | 0.10   | 0.11   | 0.09       |
| 0.06                    | 0.04       | -0.06      | 0.08       | 0.06   | 0.02   | 0.12   | 0.15   | 0.15   | 0.08   | 0.05   | 0.04       |
| 0.16                    | 0.36       | 0.44       | 0.53       | 0.43   | 0.38   | 0.47   | 0.48   | 0.49   | 0.38   | 0.40   | 0.38       |
| 0.26                    | 0.26       | 0.30       | 0.35       | 0.42   | 0.44   | 0.23   | 0.26   | 0.32   | 0.25   | 0.11   | 0.19       |
| 0.31                    | 0.39       | 0.35       | 0.41       | 0.44   | 0.43   | 0.48   | 0.33   | 0.36   | 0.23   | 0.19   | 0.40       |
| 0.36                    | -0.16      | -0.11      | -0.19      | -0.10  | -0.05  | -0.11  | -0.06  | -0.01  | -0.04  | -0.11  | -0.05      |
| 0.41                    | 0.05       | 0.07       | 0.18       | 0.19   | 0.26   | 0.29   | 0.28   | 0.34   | 0.17   | 0.16   | 0.18       |
| 0.46                    | 0.26       | 0.22       | 0.19       | 0.28   | 0.18   | 0.29   | 0.27   | 0.24   | 0.28   | 0.12   | 0.23       |
| 0.51                    | 0.15       | 0.16       | 0.17       | 0.11   | 0.17   | 0.02   | 0.06   | 0.08   | 0.01   | 0.08   | 0.02       |
| 0.56                    | 0.27       | 0.29       | 0.33       | 0.30   | 0.31   | 0.27   | 0.36   | 0.28   | 0.34   | 0.27   | 0.29       |
| 0.61                    | -0.08      | -0.13      | 0.06       | 0.06   | 0.15   | 0.10   | 0.18   | 0.07   | 0.03   | -0.09  | 0.00       |
| 0.66                    | 0.09       | 0.12       | 0.11       | 0.25   | 0.23   | 0.31   | 0.27   | 0.33   | 0.17   | 0.16   | 0.21       |
| 0.71                    | 0.05       | 0.10       | 0.15       | 0.22   | 0.24   | 0.11   | 0.15   | 0.26   | 0.24   | 0.08   | 0.05       |
| 0.76                    | 0.16       | 0.14       | 0.33       | 0.30   | 0.28   | 0.17   | 0.25   | 0.33   | 0.25   | 0.26   | 0.25       |
| 0.81                    | 0.32       | 0.31       | 0.29       | 0.30   | 0.28   | 0.33   | 0.35   | 0.30   | 0.30   | 0.24   | 0.26       |
| 0.86                    | -0.15      | -0.18      | -0.18      | -0.07  | 0.04   | -0.12  | 0.03   | -0.02  | -0.10  | -0.11  | -0.20      |
| 0.91                    | 0.43       | 0.42       | 0.61       | 0.51   | 0.46   | 0.56   | 0.51   | 0.56   | 0.42   | 0.43   | 0.50       |
| 0.96                    | 0.08       | 0.22       | 0.16       | 0.24   | 0.14   | 0.25   | 0.26   | 0.26   | 0.19   | 0.23   | 0.15       |
| 1.01                    | 0.59       | 0.38       | 0.60       | 0.57   | 0.49   | 0.50   | 0.45   | 0.45   | 0.32   | 0.38   | 0.31       |
| 1.06                    | 0.09       | 0.08       | 0.29       | 0.23   | 0.13   | 0.28   | 0.27   | 0.14   | 0.23   | 0.20   | 0.11       |
| 1.11                    | -0.11      | -0.24      | -0.51      | -0.60  | -0.30  | -0.08  | -0.06  | -0.12  | -0.10  | -0.09  | -0.19      |
| 1.16                    | -32.25     | -16.25     | -3.73      | 3.90   | 6.57   | 5.48   | 2.51   | -0.54  | -2.67  | -3.37  | -2.71      |



|      |            |            |            |         |         |         |         |         |         |         |            |
|------|------------|------------|------------|---------|---------|---------|---------|---------|---------|---------|------------|
| 1.21 | 165.7<br>6 | 126.6<br>3 | 89.95      | 57.36   | 28.75   | 3.15    | -19.40  | -39.00  | -55.59  | -69.14  | -78.42     |
| 1.26 | 298.9<br>5 | 337.9<br>1 | 367.2<br>4 | 386.73  | 398.12  | 401.56  | 397.93  | 388.39  | 374.13  | 356.46  | 337.0<br>2 |
| 1.31 | -21.48     | -47.33     | -75.04     | -100.56 | -120.68 | -132.96 | -136.97 | -132.28 | -119.75 | -100.37 | -74.50     |
| 1.36 | 6.64       | 10.28      | 13.71      | 16.93   | 19.38   | 20.72   | 20.58   | 18.36   | 14.66   | 10.42   | 7.13       |
| 1.41 | 6.45       | 4.90       | 4.25       | 4.55    | 4.99    | 5.90    | 6.80    | 7.23    | 6.99    | 6.15    | 5.14       |
| 1.46 | 9.04       | 8.84       | 7.65       | 5.70    | 3.52    | 1.56    | 0.29    | -0.03   | 0.61    | 2.14    | 4.29       |
| 1.51 | 0.23       | 0.85       | 2.07       | 3.84    | 5.47    | 6.79    | 7.53    | 7.52    | 6.89    | 6.02    | 5.24       |
| 1.56 | 3.67       | 2.01       | 1.19       | 1.14    | 2.03    | 3.58    | 5.30    | 7.05    | 8.36    | 8.92    | 8.90       |
| 1.61 | 7.33       | 7.76       | 7.23       | 6.13    | 4.71    | 3.30    | 2.14    | 1.67    | 1.79    | 2.49    | 3.71       |
| 1.66 | 1.58       | 2.10       | 3.21       | 4.46    | 5.67    | 6.34    | 6.52    | 6.20    | 5.41    | 4.29    | 3.48       |
| 1.71 | 5.81       | 4.89       | 3.67       | 2.26    | 1.17    | 0.76    | 1.00    | 1.72    | 3.00    | 4.49    | 5.88       |
| 1.76 | 2.43       | 3.97       | 5.23       | 6.03    | 6.31    | 5.83    | 5.15    | 4.18    | 3.38    | 2.81    | 2.87       |
| 1.81 | 1.33       | 0.89       | 1.18       | 2.04    | 3.00    | 4.12    | 5.14    | 5.65    | 5.77    | 5.34    | 4.69       |
| 1.86 | 5.00       | 4.03       | 3.11       | 2.03    | 1.39    | 1.07    | 1.29    | 1.91    | 2.78    | 3.87    | 4.92       |
| 1.91 | 1.00       | 2.00       | 3.15       | 4.15    | 4.72    | 4.76    | 4.54    | 3.94    | 3.16    | 2.67    | 2.49       |
| 1.96 | 2.37       | 1.42       | 0.96       | 0.87    | 1.43    | 2.17    | 3.24    | 4.39    | 5.25    | 5.71    | 5.96       |
| 2.01 | 4.57       | 5.27       | 5.59       | 5.04    | 4.15    | 3.04    | 2.08    | 1.42    | 1.31    | 1.73    | 2.61       |
| 2.06 | 0.96       | 1.01       | 1.51       | 2.41    | 3.22    | 4.02    | 4.47    | 4.57    | 4.45    | 4.04    | 3.61       |
| 2.11 | 2.78       | 1.92       | 1.28       | 1.02    | 0.97    | 1.38    | 2.20    | 3.00    | 3.93    | 4.64    | 5.15       |
| 2.16 | 2.65       | 3.62       | 4.45       | 4.70    | 4.66    | 4.19    | 3.72    | 3.14    | 2.75    | 2.54    | 2.76       |
| 2.21 | 1.42       | 1.07       | 1.21       | 1.75    | 2.58    | 3.38    | 4.25    | 4.68    | 4.85    | 4.63    | 4.27       |
| 2.26 | 4.28       | 4.04       | 3.61       | 2.88    | 2.04    | 1.71    | 1.58    | 1.83    | 2.36    | 3.14    | 4.06       |
| 2.31 | 1.03       | 1.50       | 2.26       | 2.96    | 3.50    | 3.77    | 3.72    | 3.59    | 3.23    | 2.96    | 2.85       |
| 2.36 | 1.27       | 1.22       | 1.47       | 1.81    | 2.38    | 2.73    | 3.23    | 3.50    | 3.73    | 3.70    | 3.62       |
| 2.41 | 3.90       | 3.80       | 3.53       | 3.08    | 2.40    | 1.85    | 1.59    | 1.73    | 2.00    | 2.63    | 3.46       |
| 2.46 | 0.62       | 0.85       | 1.33       | 1.90    | 2.63    | 3.31    | 3.62    | 3.67    | 3.52    | 3.24    | 3.03       |
| 2.51 | 3.74       | 3.10       | 2.44       | 1.93    | 1.41    | 1.35    | 1.68    | 2.43    | 3.25    | 4.00    | 4.86       |
| 2.56 | 2.53       | 3.08       | 3.56       | 3.55    | 3.47    | 3.33    | 3.01    | 2.78    | 2.77    | 2.74    | 3.04       |
| 2.61 | 1.17       | 1.37       | 1.96       | 2.58    | 3.09    | 3.42    | 3.45    | 3.50    | 3.31    | 3.11    | 2.95       |
| 2.66 | 3.05       | 2.66       | 2.22       | 1.96    | 1.71    | 1.86    | 2.15    | 2.70    | 3.28    | 3.95    | 4.49       |
| 2.71 | 1.94       | 2.56       | 3.13       | 3.42    | 3.61    | 3.54    | 3.41    | 3.02    | 2.80    | 2.74    | 2.84       |
| 2.76 | 2.02       | 1.56       | 1.51       | 1.60    | 1.97    | 2.49    | 3.05    | 3.50    | 3.84    | 4.11    | 4.11       |
| 2.81 | 2.71       | 2.71       | 2.55       | 2.26    | 1.97    | 1.85    | 1.81    | 2.01    | 2.31    | 2.80    | 3.38       |
| 2.86 | 1.12       | 1.63       | 2.07       | 2.41    | 2.77    | 2.75    | 2.73    | 2.58    | 2.55    | 2.50    | 2.55       |
| 2.91 | 2.18       | 1.91       | 1.67       | 1.54    | 1.71    | 1.99    | 2.41    | 2.93    | 3.43    | 3.92    | 4.18       |
| 2.96 | 2.40       | 2.60       | 2.85       | 2.83    | 2.72    | 2.46    | 2.38    | 2.33    | 2.31    | 2.54    | 2.96       |
| 3.01 | 1.35       | 1.09       | 1.25       | 1.49    | 1.89    | 2.39    | 2.93    | 3.30    | 3.47    | 3.54    | 3.59       |
| 3.06 | 2.14       | 1.97       | 1.79       | 1.54    | 1.43    | 1.33    | 1.64    | 1.94    | 2.46    | 2.79    | 3.29       |
| 3.11 | 1.69       | 1.98       | 2.19       | 2.46    | 2.48    | 2.40    | 2.42    | 2.35    | 2.34    | 2.45    | 2.71       |
| 3.16 | 1.32       | 1.28       | 1.32       | 1.53    | 1.91    | 2.36    | 2.77    | 3.13    | 3.49    | 3.53    | 3.52       |
| 3.21 | 2.38       | 2.37       | 2.35       | 2.16    | 2.11    | 2.10    | 2.34    | 2.55    | 2.88    | 3.16    | 3.66       |
| 3.26 | 1.61       | 1.84       | 2.20       | 2.60    | 2.83    | 2.88    | 3.03    | 3.14    | 3.08    | 3.01    | 3.20       |
| 3.31 | 2.13       | 1.99       | 1.96       | 2.13    | 2.19    | 2.61    | 2.82    | 3.18    | 3.58    | 3.77    | 3.97       |
| 3.36 | 2.52       | 2.72       | 2.63       | 2.69    | 2.53    | 2.52    | 2.51    | 2.54    | 2.68    | 3.07    | 3.45       |
| 3.41 | 1.49       | 1.66       | 1.89       | 2.30    | 2.62    | 2.99    | 3.19    | 3.21    | 3.21    | 3.25    | 3.30       |
| 3.46 | 2.28       | 2.09       | 1.89       | 1.91    | 1.97    | 2.10    | 2.54    | 2.86    | 3.30    | 3.59    | 3.86       |
| 3.51 | 1.88       | 2.07       | 2.43       | 2.65    | 2.65    | 2.75    | 2.72    | 2.69    | 2.72    | 2.86    | 3.15       |
| 3.56 | 1.35       | 1.48       | 1.54       | 1.90    | 2.16    | 2.46    | 2.89    | 3.24    | 3.27    | 3.44    | 3.56       |
| 3.61 | 1.84       | 1.79       | 1.67       | 1.68    | 1.73    | 1.81    | 2.08    | 2.20    | 2.53    | 2.79    | 3.22       |

|      |      |      |      |      |      |      |      |      |      |      |      |
|------|------|------|------|------|------|------|------|------|------|------|------|
| 3.66 | 1.42 | 1.67 | 2.02 | 2.22 | 2.42 | 2.50 | 2.70 | 2.63 | 2.55 | 2.60 | 2.80 |
| 3.71 | 2.25 | 1.96 | 1.99 | 2.05 | 2.11 | 2.39 | 2.68 | 3.03 | 3.25 | 3.57 | 3.81 |
| 3.76 | 2.31 | 2.35 | 2.44 | 2.51 | 2.62 | 2.68 | 2.75 | 2.94 | 3.17 | 3.47 | 3.72 |
| 3.81 | 1.31 | 1.44 | 1.71 | 1.98 | 2.29 | 2.40 | 2.55 | 2.74 | 2.70 | 2.84 | 2.86 |
| 3.86 | 1.36 | 1.22 | 1.24 | 1.24 | 1.37 | 1.53 | 1.77 | 2.02 | 2.44 | 2.67 | 2.93 |
| 3.91 | 1.74 | 1.78 | 2.10 | 2.32 | 2.34 | 2.33 | 2.42 | 2.55 | 2.63 | 2.82 | 3.03 |
| 3.96 | 1.52 | 1.44 | 1.58 | 1.82 | 2.01 | 2.30 | 2.67 | 2.85 | 3.05 | 3.16 | 3.23 |
| 4.01 | 2.56 | 2.41 | 2.46 | 2.47 | 2.29 | 2.43 | 2.63 | 2.90 | 3.22 | 3.46 | 3.88 |
| 4.06 | 1.81 | 1.97 | 2.22 | 2.32 | 2.50 | 2.60 | 2.68 | 2.86 | 2.99 | 3.08 | 3.30 |
| 4.11 | 1.28 | 1.18 | 1.31 | 1.52 | 1.76 | 2.04 | 2.31 | 2.58 | 2.87 | 2.96 | 3.12 |
| 4.16 | 2.14 | 2.13 | 2.29 | 2.39 | 2.34 | 2.37 | 2.46 | 2.62 | 2.91 | 3.16 | 3.54 |
| 4.21 | 1.62 | 1.69 | 1.98 | 2.19 | 2.43 | 2.51 | 2.78 | 2.94 | 3.09 | 3.12 | 3.41 |
| 4.26 | 1.93 | 1.83 | 1.88 | 1.82 | 2.00 | 2.25 | 2.41 | 2.72 | 2.98 | 3.36 | 3.62 |
| 4.31 | 1.50 | 1.64 | 1.77 | 1.88 | 1.92 | 2.05 | 2.08 | 2.16 | 2.44 | 2.47 | 2.80 |
| 4.36 | 1.32 | 1.51 | 1.66 | 1.92 | 2.06 | 2.27 | 2.54 | 2.50 | 2.65 | 2.75 | 2.95 |
| 4.41 | 1.56 | 1.52 | 1.51 | 1.71 | 1.69 | 1.85 | 2.07 | 2.22 | 2.57 | 2.90 | 3.20 |
| 4.46 | 1.93 | 2.15 | 2.31 | 2.50 | 2.66 | 2.71 | 2.75 | 2.91 | 3.01 | 3.17 | 3.40 |
| 4.51 | 1.56 | 1.42 | 1.58 | 1.62 | 1.84 | 2.13 | 2.34 | 2.62 | 2.86 | 3.05 | 3.36 |
| 4.56 | 1.60 | 1.66 | 1.79 | 1.79 | 1.87 | 1.99 | 2.20 | 2.40 | 2.64 | 2.83 | 3.11 |
| 4.61 | 1.12 | 1.17 | 1.34 | 1.47 | 1.61 | 1.74 | 1.87 | 2.05 | 2.17 | 2.28 | 2.58 |
| 4.66 | 1.59 | 1.62 | 1.68 | 1.75 | 1.96 | 2.24 | 2.46 | 2.77 | 2.95 | 3.20 | 3.50 |
| 4.71 | 2.01 | 2.17 | 2.34 | 2.39 | 2.41 | 2.51 | 2.62 | 2.81 | 2.97 | 3.13 | 3.34 |
| 4.76 | 1.74 | 1.89 | 2.09 | 2.32 | 2.52 | 2.68 | 2.86 | 3.13 | 3.20 | 3.27 | 3.48 |
| 4.81 | 1.61 | 1.50 | 1.54 | 1.70 | 1.72 | 1.97 | 2.17 | 2.46 | 2.69 | 2.93 | 3.10 |
| 4.86 | 1.16 | 1.15 | 1.40 | 1.48 | 1.67 | 1.77 | 1.99 | 2.14 | 2.27 | 2.45 | 2.80 |
| 4.91 | 1.63 | 1.69 | 1.94 | 2.09 | 2.36 | 2.52 | 2.73 | 2.98 | 3.09 | 3.23 | 3.54 |
| 4.96 | 1.75 | 1.72 | 1.82 | 1.84 | 1.97 | 2.05 | 2.23 | 2.38 | 2.67 | 2.87 | 3.20 |
| 5.01 | 1.66 | 1.75 | 1.85 | 2.04 | 2.16 | 2.40 | 2.54 | 2.63 | 2.85 | 3.05 | 3.21 |
| 5.06 | 1.39 | 1.37 | 1.50 | 1.69 | 1.75 | 1.94 | 2.21 | 2.44 | 2.62 | 2.86 | 3.07 |
| 5.11 | 1.58 | 1.61 | 1.80 | 1.84 | 1.96 | 2.05 | 2.20 | 2.39 | 2.53 | 2.71 | 3.02 |
| 5.16 | 1.27 | 1.44 | 1.63 | 1.74 | 1.93 | 2.09 | 2.27 | 2.52 | 2.54 | 2.84 | 3.05 |
| 5.21 | 1.07 | 1.16 | 1.17 | 1.38 | 1.48 | 1.56 | 1.81 | 1.98 | 2.22 | 2.49 | 2.77 |
| 5.26 | 1.73 | 1.77 | 1.93 | 2.08 | 2.16 | 2.35 | 2.51 | 2.64 | 2.83 | 3.10 | 3.30 |
| 5.31 | 1.43 | 1.39 | 1.56 | 1.79 | 2.00 | 2.16 | 2.40 | 2.55 | 2.64 | 2.79 | 3.11 |
| 5.38 | 1.12 | 1.27 | 1.32 | 1.45 | 1.64 | 1.79 | 1.96 | 2.20 | 2.43 | 2.55 | 2.74 |
| 5.45 | 1.51 | 1.69 | 1.80 | 2.06 | 2.19 | 2.37 | 2.52 | 2.64 | 2.98 | 3.03 | 3.27 |
| 5.53 | 1.26 | 1.23 | 1.38 | 1.53 | 1.63 | 1.79 | 2.04 | 2.15 | 2.48 | 2.71 | 2.94 |
| 5.61 | 1.59 | 1.58 | 1.71 | 1.82 | 1.94 | 2.10 | 2.26 | 2.56 | 2.82 | 2.98 | 3.36 |
| 5.70 | 1.17 | 1.27 | 1.37 | 1.57 | 1.75 | 2.02 | 2.25 | 2.43 | 2.54 | 2.81 | 3.08 |
| 5.80 | 1.28 | 1.37 | 1.42 | 1.58 | 1.63 | 1.92 | 2.12 | 2.32 | 2.49 | 2.66 | 3.06 |
| 5.90 | 1.51 | 1.53 | 1.66 | 1.73 | 1.91 | 2.01 | 2.18 | 2.44 | 2.67 | 2.84 | 3.16 |
| 6.01 | 1.86 | 1.81 | 1.85 | 1.94 | 2.14 | 2.24 | 2.54 | 2.69 | 2.89 | 3.12 | 3.42 |
| 6.13 | 1.45 | 1.56 | 1.66 | 1.84 | 2.00 | 2.09 | 2.32 | 2.56 | 2.69 | 2.91 | 3.29 |
| 6.25 | 1.39 | 1.45 | 1.67 | 1.81 | 2.05 | 2.19 | 2.38 | 2.51 | 2.71 | 2.92 | 3.19 |
| 6.39 | 1.69 | 1.78 | 2.02 | 2.14 | 2.23 | 2.29 | 2.59 | 2.80 | 2.87 | 3.09 | 3.38 |
| 6.53 | 1.72 | 1.73 | 1.90 | 2.05 | 2.20 | 2.30 | 2.57 | 2.76 | 2.99 | 3.10 | 3.39 |
| 6.69 | 1.94 | 1.92 | 2.25 | 2.35 | 2.42 | 2.56 | 2.78 | 2.99 | 3.12 | 3.35 | 3.61 |
| 6.85 | 1.62 | 1.61 | 1.77 | 1.99 | 2.04 | 2.31 | 2.44 | 2.59 | 2.90 | 3.09 | 3.33 |
| 7.03 | 1.56 | 1.64 | 1.77 | 1.92 | 2.06 | 2.27 | 2.49 | 2.74 | 2.78 | 3.00 | 3.42 |
| 7.21 | 1.78 | 1.87 | 2.01 | 2.21 | 2.26 | 2.43 | 2.69 | 2.84 | 3.09 | 3.23 | 3.52 |

|       |      |      |      |      |      |      |      |      |      |      |      |
|-------|------|------|------|------|------|------|------|------|------|------|------|
| 7.41  | 1.89 | 1.89 | 2.10 | 2.23 | 2.43 | 2.44 | 2.73 | 2.99 | 3.09 | 3.32 | 3.64 |
| 7.63  | 1.82 | 1.85 | 2.06 | 2.09 | 2.25 | 2.43 | 2.63 | 2.81 | 2.99 | 3.26 | 3.59 |
| 7.86  | 1.80 | 1.83 | 1.92 | 2.11 | 2.26 | 2.45 | 2.58 | 2.82 | 3.02 | 3.24 | 3.49 |
| 8.10  | 1.52 | 1.61 | 1.80 | 1.90 | 2.15 | 2.21 | 2.50 | 2.55 | 2.84 | 3.00 | 3.35 |
| 8.36  | 1.38 | 1.44 | 1.61 | 1.65 | 1.89 | 2.03 | 2.06 | 2.39 | 2.53 | 2.79 | 3.04 |
| 8.64  | 1.73 | 1.79 | 1.97 | 2.21 | 2.16 | 2.44 | 2.65 | 2.82 | 3.12 | 3.21 | 3.60 |
| 8.94  | 1.95 | 1.92 | 2.10 | 2.18 | 2.36 | 2.63 | 2.77 | 2.96 | 3.27 | 3.43 | 3.71 |
| 9.26  | 2.04 | 2.07 | 2.19 | 2.46 | 2.56 | 2.82 | 3.06 | 3.21 | 3.47 | 3.72 | 3.97 |
| 9.60  | 1.61 | 1.64 | 1.85 | 2.05 | 2.11 | 2.32 | 2.59 | 2.68 | 2.97 | 3.22 | 3.52 |
| 9.97  | 1.58 | 1.71 | 1.81 | 1.99 | 2.19 | 2.30 | 2.56 | 2.72 | 2.92 | 3.09 | 3.41 |
| 10.36 | 1.81 | 1.95 | 2.10 | 2.18 | 2.41 | 2.53 | 2.78 | 3.03 | 3.25 | 3.47 | 3.80 |
| 10.77 | 1.79 | 1.89 | 2.03 | 2.11 | 2.23 | 2.40 | 2.74 | 2.88 | 3.13 | 3.33 | 3.64 |
| 11.22 | 1.71 | 1.88 | 2.01 | 2.11 | 2.22 | 2.47 | 2.62 | 2.88 | 3.04 | 3.40 | 3.63 |
| 11.70 | 1.96 | 1.98 | 2.06 | 2.30 | 2.43 | 2.54 | 2.85 | 3.16 | 3.19 | 3.44 | 3.84 |
| 12.21 | 1.42 | 1.45 | 1.68 | 1.86 | 2.00 | 2.12 | 2.37 | 2.65 | 2.76 | 3.08 | 3.29 |
| 12.75 | 1.67 | 1.75 | 1.92 | 2.06 | 2.17 | 2.48 | 2.53 | 2.79 | 3.08 | 3.28 | 3.46 |
| 13.33 | 1.80 | 1.85 | 2.10 | 2.23 | 2.28 | 2.42 | 2.83 | 2.88 | 3.19 | 3.38 | 3.61 |
| 13.95 | 1.67 | 1.78 | 1.82 | 2.04 | 2.18 | 2.35 | 2.56 | 2.81 | 3.03 | 3.28 | 3.55 |
| 14.62 | 1.58 | 1.60 | 1.65 | 1.88 | 1.95 | 2.24 | 2.45 | 2.58 | 2.91 | 3.05 | 3.35 |
| 15.33 | 1.39 | 1.37 | 1.68 | 1.79 | 1.96 | 2.18 | 2.34 | 2.56 | 2.72 | 2.96 | 3.19 |
| 16.09 | 1.52 | 1.41 | 1.56 | 1.85 | 1.93 | 2.14 | 2.40 | 2.58 | 2.77 | 3.02 | 3.31 |
| 16.90 | 1.45 | 1.55 | 1.57 | 1.77 | 1.93 | 2.13 | 2.30 | 2.64 | 2.72 | 3.04 | 3.23 |
| 17.77 | 1.64 | 1.66 | 1.79 | 1.95 | 2.00 | 2.27 | 2.48 | 2.64 | 2.88 | 3.11 | 3.47 |
| 18.70 | 1.47 | 1.65 | 1.74 | 1.93 | 1.95 | 2.14 | 2.44 | 2.68 | 2.91 | 3.12 | 3.40 |
| 19.69 | 1.41 | 1.44 | 1.72 | 1.80 | 1.98 | 2.11 | 2.36 | 2.62 | 2.77 | 3.07 | 3.36 |
| 20.75 | 1.24 | 1.31 | 1.46 | 1.62 | 1.84 | 2.02 | 2.22 | 2.51 | 2.60 | 2.95 | 3.20 |
| 21.89 | 1.69 | 1.87 | 2.03 | 2.19 | 2.33 | 2.51 | 2.75 | 2.93 | 3.15 | 3.34 | 3.55 |
| 23.10 | 1.83 | 1.98 | 2.18 | 2.33 | 2.48 | 2.55 | 2.78 | 3.06 | 3.38 | 3.58 | 3.92 |
| 24.39 | 1.67 | 1.60 | 1.83 | 1.91 | 2.18 | 2.31 | 2.59 | 2.75 | 2.85 | 3.24 | 3.49 |
| 25.78 | 1.56 | 1.63 | 1.74 | 1.86 | 2.08 | 2.24 | 2.48 | 2.66 | 2.88 | 3.09 | 3.32 |
| 27.26 | 1.54 | 1.67 | 1.81 | 1.95 | 2.14 | 2.27 | 2.59 | 2.71 | 2.89 | 3.14 | 3.47 |
| 28.84 | 1.60 | 1.75 | 1.79 | 2.01 | 2.14 | 2.23 | 2.50 | 2.66 | 2.81 | 3.14 | 3.29 |
| 30.53 | 1.67 | 1.76 | 1.98 | 2.13 | 2.23 | 2.48 | 2.65 | 2.83 | 3.11 | 3.30 | 3.68 |
| 32.34 | 1.33 | 1.41 | 1.58 | 1.81 | 1.95 | 2.07 | 2.34 | 2.46 | 2.66 | 2.95 | 3.30 |
| 34.27 | 1.58 | 1.62 | 1.89 | 1.89 | 2.09 | 2.21 | 2.46 | 2.71 | 2.95 | 3.24 | 3.48 |
| 36.34 | 1.35 | 1.45 | 1.72 | 1.91 | 2.05 | 2.18 | 2.46 | 2.55 | 2.87 | 3.02 | 3.40 |
| 38.55 | 1.67 | 1.74 | 1.92 | 1.99 | 2.21 | 2.34 | 2.57 | 2.67 | 2.93 | 3.14 | 3.47 |
| 40.91 | 1.50 | 1.62 | 1.66 | 1.92 | 2.10 | 2.25 | 2.49 | 2.67 | 2.85 | 3.12 | 3.36 |
| 43.43 | 1.31 | 1.43 | 1.57 | 1.72 | 1.85 | 2.04 | 2.25 | 2.47 | 2.58 | 2.82 | 3.09 |
| 46.13 | 1.35 | 1.47 | 1.66 | 1.79 | 1.95 | 2.21 | 2.50 | 2.59 | 2.86 | 3.04 | 3.40 |
| 49.01 | 1.42 | 1.55 | 1.70 | 1.87 | 2.02 | 2.23 | 2.38 | 2.61 | 2.88 | 3.11 | 3.33 |
| 52.09 | 1.18 | 1.16 | 1.40 | 1.45 | 1.64 | 1.90 | 2.09 | 2.22 | 2.50 | 2.75 | 3.03 |
| 55.39 | 1.04 | 1.21 | 1.29 | 1.43 | 1.70 | 1.79 | 2.04 | 2.35 | 2.56 | 2.77 | 3.14 |
| 58.91 | 1.00 | 1.09 | 1.33 | 1.45 | 1.56 | 1.82 | 2.04 | 2.22 | 2.49 | 2.75 | 2.99 |
| 62.68 | 0.81 | 0.88 | 1.02 | 1.20 | 1.37 | 1.52 | 1.77 | 2.05 | 2.30 | 2.46 | 2.80 |
| 66.70 | 1.06 | 1.19 | 1.35 | 1.56 | 1.73 | 1.86 | 2.16 | 2.33 | 2.57 | 2.85 | 3.12 |
| 71.00 | 0.88 | 0.97 | 1.18 | 1.46 | 1.50 | 1.71 | 1.79 | 2.08 | 2.29 | 2.48 | 2.78 |
| 75.60 | 0.74 | 0.89 | 1.05 | 1.20 | 1.42 | 1.69 | 1.98 | 2.03 | 2.35 | 2.58 | 2.80 |
| 80.51 | 1.18 | 1.21 | 1.45 | 1.65 | 1.84 | 1.96 | 2.20 | 2.38 | 2.49 | 2.77 | 3.05 |
| 85.77 | 0.54 | 0.60 | 0.90 | 1.00 | 1.13 | 1.30 | 1.62 | 1.83 | 1.99 | 2.23 | 2.60 |

|         |       |       |       |       |      |      |      |      |      |      |      |
|---------|-------|-------|-------|-------|------|------|------|------|------|------|------|
| 91.38   | 1.00  | 1.06  | 1.37  | 1.50  | 1.69 | 1.83 | 2.19 | 2.35 | 2.65 | 2.78 | 3.15 |
| 97.39   | 0.56  | 0.69  | 0.85  | 1.00  | 1.10 | 1.27 | 1.62 | 1.76 | 2.04 | 2.19 | 2.65 |
| 103.80  | 0.81  | 0.80  | 1.16  | 1.28  | 1.53 | 1.69 | 2.07 | 2.27 | 2.53 | 2.68 | 3.06 |
| 110.66  | 0.84  | 0.97  | 1.15  | 1.40  | 1.56 | 1.69 | 2.10 | 2.21 | 2.51 | 2.67 | 3.02 |
| 117.99  | 0.20  | 0.43  | 0.58  | 0.75  | 1.04 | 1.22 | 1.50 | 1.87 | 1.96 | 2.23 | 2.56 |
| 125.83  | 0.84  | 0.91  | 1.24  | 1.42  | 1.67 | 1.86 | 2.13 | 2.32 | 2.66 | 2.86 | 3.13 |
| 134.21  | 0.38  | 0.52  | 0.88  | 0.99  | 1.25 | 1.38 | 1.71 | 2.05 | 2.22 | 2.43 | 2.78 |
| 143.17  | 0.47  | 0.55  | 0.63  | 0.98  | 1.15 | 1.29 | 1.59 | 1.87 | 2.16 | 2.29 | 2.64 |
| 152.74  | 0.60  | 0.73  | 0.99  | 1.18  | 1.38 | 1.58 | 1.92 | 2.17 | 2.38 | 2.58 | 2.85 |
| 162.97  | 0.80  | 0.93  | 1.12  | 1.31  | 1.37 | 1.59 | 1.88 | 2.06 | 2.25 | 2.59 | 2.86 |
| 173.91  | 0.52  | 0.54  | 0.70  | 0.94  | 1.13 | 1.39 | 1.50 | 1.82 | 2.07 | 2.37 | 2.64 |
| 185.60  | 0.87  | 0.76  | 1.02  | 1.27  | 1.26 | 1.43 | 1.87 | 2.12 | 2.28 | 2.48 | 2.85 |
| 198.10  | 0.50  | 0.57  | 0.75  | 0.91  | 1.07 | 1.28 | 1.57 | 1.76 | 2.01 | 2.33 | 2.53 |
| 211.46  | 0.91  | 0.99  | 1.13  | 1.27  | 1.50 | 1.75 | 1.82 | 2.16 | 2.34 | 2.55 | 2.94 |
| 225.75  | 0.73  | 0.78  | 0.93  | 1.17  | 1.22 | 1.47 | 1.71 | 1.91 | 2.20 | 2.42 | 2.69 |
| 241.01  | 0.64  | 0.64  | 0.91  | 1.08  | 1.25 | 1.47 | 1.61 | 1.81 | 2.14 | 2.31 | 2.68 |
| 257.33  | 0.45  | 0.47  | 0.68  | 0.87  | 1.08 | 1.33 | 1.56 | 1.81 | 1.97 | 2.24 | 2.54 |
| 274.77  | 0.62  | 0.67  | 0.89  | 1.01  | 1.19 | 1.47 | 1.63 | 2.07 | 2.21 | 2.47 | 2.80 |
| 293.42  | 0.65  | 0.64  | 0.85  | 1.02  | 1.11 | 1.30 | 1.65 | 1.83 | 2.07 | 2.32 | 2.62 |
| 313.35  | 0.43  | 0.51  | 0.68  | 0.89  | 1.06 | 1.22 | 1.42 | 1.82 | 1.95 | 2.16 | 2.55 |
| 334.66  | 0.63  | 0.69  | 0.84  | 1.05  | 1.29 | 1.43 | 1.70 | 1.84 | 2.14 | 2.39 | 2.75 |
| 357.43  | 0.27  | 0.34  | 0.55  | 0.71  | 0.93 | 1.05 | 1.39 | 1.67 | 1.83 | 2.09 | 2.43 |
| 381.78  | 0.60  | 0.71  | 0.90  | 1.08  | 1.16 | 1.41 | 1.70 | 1.90 | 2.17 | 2.49 | 2.75 |
| 407.80  | 0.36  | 0.51  | 0.63  | 0.86  | 0.95 | 1.17 | 1.39 | 1.70 | 1.93 | 2.16 | 2.52 |
| 435.62  | 0.44  | 0.42  | 0.64  | 0.90  | 1.00 | 1.27 | 1.48 | 1.72 | 2.03 | 2.28 | 2.50 |
| 465.35  | 0.33  | 0.35  | 0.54  | 0.79  | 0.99 | 1.17 | 1.50 | 1.69 | 1.99 | 2.23 | 2.60 |
| 497.14  | 0.00  | 0.20  | 0.34  | 0.48  | 0.58 | 0.90 | 1.11 | 1.42 | 1.72 | 1.97 | 2.24 |
| 531.11  | -0.02 | 0.09  | 0.21  | 0.35  | 0.61 | 0.79 | 1.05 | 1.32 | 1.65 | 1.84 | 2.25 |
| 567.43  | 0.27  | 0.25  | 0.55  | 0.68  | 0.92 | 1.11 | 1.31 | 1.52 | 1.83 | 2.16 | 2.47 |
| 606.26  | 0.13  | 0.14  | 0.35  | 0.53  | 0.66 | 0.90 | 1.06 | 1.27 | 1.68 | 1.94 | 2.33 |
| 647.76  | 0.16  | 0.30  | 0.38  | 0.65  | 0.80 | 1.01 | 1.31 | 1.59 | 1.87 | 2.16 | 2.51 |
| 692.12  | -0.09 | -0.05 | 0.08  | 0.24  | 0.53 | 0.78 | 0.94 | 1.18 | 1.45 | 1.67 | 2.03 |
| 739.53  | 0.27  | 0.45  | 0.59  | 0.80  | 0.88 | 1.19 | 1.45 | 1.60 | 1.87 | 2.21 | 2.59 |
| 790.22  | -0.24 | -0.16 | -0.02 | 0.02  | 0.33 | 0.56 | 0.83 | 1.06 | 1.36 | 1.66 | 1.92 |
| 844.40  | -0.26 | -0.16 | 0.01  | 0.14  | 0.38 | 0.56 | 0.93 | 1.16 | 1.43 | 1.64 | 2.05 |
| 902.32  | 0.22  | 0.35  | 0.48  | 0.70  | 0.76 | 1.06 | 1.28 | 1.49 | 1.73 | 2.04 | 2.31 |
| 964.23  | -0.30 | -0.27 | -0.13 | 0.08  | 0.16 | 0.41 | 0.68 | 0.98 | 1.17 | 1.48 | 1.85 |
| 1030.41 | 0.43  | 0.61  | 0.77  | 0.93  | 1.13 | 1.34 | 1.61 | 1.84 | 2.12 | 2.49 | 2.77 |
| 1101.15 | 0.06  | 0.13  | 0.16  | 0.41  | 0.61 | 0.82 | 1.13 | 1.42 | 1.65 | 1.98 | 2.27 |
| 1176.77 | 0.30  | 0.44  | 0.71  | 0.80  | 0.94 | 1.19 | 1.41 | 1.59 | 1.93 | 2.21 | 2.46 |
| 1257.60 | 0.33  | 0.39  | 0.60  | 0.68  | 0.97 | 1.10 | 1.33 | 1.57 | 1.92 | 2.20 | 2.48 |
| 1344.00 | -0.13 | 0.02  | 0.23  | 0.30  | 0.49 | 0.70 | 1.06 | 1.20 | 1.49 | 1.84 | 2.14 |
| 1436.36 | 0.05  | 0.19  | 0.37  | 0.50  | 0.79 | 1.00 | 1.26 | 1.50 | 1.79 | 2.14 | 2.53 |
| 1535.09 | 0.04  | 0.08  | 0.21  | 0.49  | 0.60 | 0.77 | 1.14 | 1.33 | 1.66 | 1.91 | 2.37 |
| 1640.63 | -0.35 | -0.28 | -0.06 | 0.05  | 0.19 | 0.50 | 0.73 | 0.95 | 1.29 | 1.58 | 1.87 |
| 1753.44 | -0.09 | -0.02 | 0.26  | 0.31  | 0.53 | 0.60 | 1.01 | 1.27 | 1.43 | 1.73 | 2.06 |
| 1874.02 | -0.29 | -0.11 | -0.04 | 0.07  | 0.20 | 0.36 | 0.70 | 0.87 | 1.23 | 1.52 | 1.89 |
| 2002.92 | -0.01 | 0.15  | 0.22  | 0.34  | 0.41 | 0.66 | 1.00 | 1.29 | 1.58 | 1.77 | 2.11 |
| 2140.71 | -0.36 | -0.32 | -0.21 | -0.03 | 0.14 | 0.35 | 0.64 | 0.86 | 1.19 | 1.52 | 1.84 |
| 2288.00 | -0.20 | -0.26 | -0.12 | 0.01  | 0.16 | 0.38 | 0.72 | 0.93 | 1.13 | 1.41 | 1.87 |

|         |       |       |       |       |       |       |      |      |      |      |      |
|---------|-------|-------|-------|-------|-------|-------|------|------|------|------|------|
| 2445.44 | -0.44 | -0.43 | -0.37 | -0.09 | 0.04  | 0.17  | 0.33 | 0.64 | 0.93 | 1.24 | 1.61 |
| 2613.73 | -0.24 | -0.21 | -0.11 | -0.01 | 0.17  | 0.24  | 0.48 | 0.84 | 1.10 | 1.29 | 1.66 |
| 2793.63 | 0.02  | 0.04  | 0.23  | 0.36  | 0.48  | 0.54  | 0.76 | 1.08 | 1.32 | 1.62 | 1.97 |
| 2985.93 | -0.22 | -0.40 | -0.27 | -0.27 | -0.27 | -0.18 | 0.14 | 0.35 | 0.65 | 0.96 | 1.28 |
| 3191.49 | -0.10 | -0.14 | -0.03 | -0.01 | 0.10  | 0.14  | 0.45 | 0.67 | 0.98 | 1.19 | 1.56 |
| 3411.21 | 0.05  | -0.10 | -0.08 | 0.03  | 0.00  | 0.21  | 0.38 | 0.60 | 0.91 | 1.18 | 1.41 |
| 3646.09 | 0.01  | -0.07 | -0.02 | -0.01 | 0.06  | 0.11  | 0.31 | 0.50 | 0.85 | 1.02 | 1.34 |
| 3897.16 | 0.03  | -0.11 | -0.08 | 0.05  | 0.05  | 0.14  | 0.41 | 0.67 | 0.87 | 1.17 | 1.52 |

| Wavelength (nm) / Time (ps) | 506.40 | 507.82 | 509.25 | 510.67 | 512.10 | 513.52 | 514.94 | 516.37 | 517.79 | 519.22 | 520.64 |
|-----------------------------|--------|--------|--------|--------|--------|--------|--------|--------|--------|--------|--------|
| -2.74                       | -0.33  | -0.41  | -0.42  | -0.36  | -0.46  | -0.42  | -0.35  | -0.39  | -0.43  | -0.44  | -0.36  |
| -2.24                       | -0.05  | -0.16  | 0.01   | -0.09  | -0.13  | -0.14  | -0.17  | -0.09  | -0.17  | -0.15  | -0.12  |
| -1.74                       | -0.28  | -0.42  | -0.32  | -0.34  | -0.32  | -0.36  | -0.49  | -0.42  | -0.36  | -0.35  | -0.33  |
| -1.24                       | -0.02  | 0.16   | 0.07   | 0.01   | -0.01  | 0.03   | 0.00   | -0.04  | -0.02  | 0.02   | -0.07  |
| -0.74                       | 0.31   | 0.28   | 0.30   | 0.28   | 0.35   | 0.34   | 0.36   | 0.33   | 0.43   | 0.33   | 0.36   |
| -0.24                       | 0.09   | 0.15   | 0.08   | 0.18   | 0.13   | 0.17   | 0.18   | 0.17   | 0.17   | 0.18   | 0.16   |
| -0.14                       | 0.26   | 0.22   | 0.25   | 0.25   | 0.27   | 0.33   | 0.37   | 0.38   | 0.35   | 0.35   | 0.30   |
| -0.04                       | 0.02   | 0.18   | 0.04   | 0.06   | 0.16   | 0.05   | 0.11   | 0.06   | 0.03   | 0.07   | 0.06   |
| 0.06                        | 0.07   | 0.14   | 0.08   | 0.07   | 0.21   | 0.15   | 0.18   | 0.17   | 0.13   | 0.16   | 0.14   |
| 0.16                        | 0.42   | 0.36   | 0.35   | 0.28   | 0.40   | 0.37   | 0.35   | 0.45   | 0.42   | 0.42   | 0.38   |
| 0.26                        | 0.12   | 0.19   | 0.13   | 0.16   | 0.07   | 0.06   | 0.08   | 0.15   | 0.13   | 0.12   | 0.20   |
| 0.31                        | 0.30   | 0.28   | 0.23   | 0.13   | 0.30   | 0.27   | 0.26   | 0.18   | 0.28   | 0.31   | 0.23   |
| 0.36                        | 0.00   | -0.09  | -0.11  | -0.09  | -0.08  | -0.13  | -0.07  | -0.07  | -0.07  | -0.03  | -0.06  |
| 0.41                        | 0.17   | 0.15   | 0.14   | 0.14   | 0.11   | 0.22   | 0.11   | 0.17   | 0.16   | 0.13   | 0.12   |
| 0.46                        | 0.25   | 0.27   | 0.16   | 0.19   | 0.33   | 0.29   | 0.29   | 0.22   | 0.31   | 0.31   | 0.26   |
| 0.51                        | 0.05   | 0.08   | 0.05   | 0.02   | 0.02   | 0.01   | 0.05   | 0.08   | 0.06   | -0.02  | 0.03   |
| 0.56                        | 0.31   | 0.33   | 0.23   | 0.16   | 0.35   | 0.29   | 0.35   | 0.33   | 0.37   | 0.29   | 0.33   |
| 0.61                        | 0.01   | -0.10  | -0.01  | -0.10  | -0.09  | -0.12  | -0.05  | -0.06  | -0.01  | -0.02  | 0.00   |
| 0.66                        | 0.27   | 0.27   | 0.26   | 0.27   | 0.19   | 0.24   | 0.28   | 0.27   | 0.25   | 0.25   | 0.17   |
| 0.71                        | 0.14   | 0.16   | 0.15   | 0.15   | 0.20   | 0.16   | 0.19   | 0.25   | 0.23   | 0.15   | 0.17   |
| 0.76                        | 0.18   | 0.22   | 0.12   | 0.13   | 0.14   | 0.15   | 0.18   | 0.15   | 0.22   | 0.16   | 0.14   |
| 0.81                        | 0.25   | 0.28   | 0.30   | 0.34   | 0.39   | 0.42   | 0.41   | 0.35   | 0.40   | 0.41   | 0.26   |
| 0.86                        | -0.11  | -0.11  | -0.17  | -0.19  | -0.17  | -0.19  | -0.18  | -0.16  | -0.11  | -0.05  | -0.07  |
| 0.91                        | 0.44   | 0.46   | 0.41   | 0.40   | 0.50   | 0.45   | 0.53   | 0.44   | 0.47   | 0.47   | 0.46   |
| 0.96                        | 0.21   | 0.20   | 0.19   | 0.16   | 0.15   | 0.24   | 0.23   | 0.29   | 0.29   | 0.32   | 0.19   |
| 1.01                        | 0.32   | 0.34   | 0.27   | 0.17   | 0.17   | 0.24   | 0.26   | 0.22   | 0.25   | 0.24   | 0.16   |
| 1.06                        | 0.21   | 0.36   | 0.11   | 0.17   | 0.29   | 0.23   | 0.29   | 0.32   | 0.21   | 0.26   | 0.28   |
| 1.11                        | -0.30  | -0.14  | -0.16  | -0.24  | -0.26  | -0.20  | -0.09  | -0.18  | -0.15  | -0.07  | -0.12  |
| 1.16                        | -1.43  | 0.00   | 1.01   | 1.38   | 0.96   | 0.34   | -0.20  | -0.41  | -0.09  | 0.24   | 0.33   |
| 1.21                        | -83.24 | -82.40 | -76.36 | -65.42 | -50.88 | -34.95 | -19.97 | -7.43  | 1.15   | 5.55   | 6.34   |
| 1.26                        | 317.95 | 299.85 | 279.27 | 259.04 | 237.07 | 212.40 | 187.42 | 159.83 | 132.57 | 105.25 | 78.52  |
| 1.31                        | -42.92 | -5.55  | 33.58  | 75.61  | 118.64 | 160.65 | 201.61 | 238.26 | 271.67 | 299.78 | 321.39 |
| 1.36                        | 5.99   | 7.26   | 9.87   | 12.33  | 12.70  | 8.92   | 0.34   | -13.07 | -29.96 | -48.65 | -66.88 |
| 1.41                        | 3.89   | 2.61   | 1.93   | 1.83   | 2.75   | 4.34   | 6.58   | 9.23   | 12.08  | 14.68  | 17.06  |
| 1.46                        | 6.62   | 8.74   | 10.30  | 11.09  | 11.25  | 10.82  | 10.18  | 9.27   | 8.47   | 7.88   | 7.59   |
| 1.51                        | 4.63   | 4.44   | 4.71   | 5.43   | 6.60   | 7.70   | 8.80   | 9.47   | 9.94   | 9.88   | 9.54   |
| 1.56                        | 8.10   | 6.96   | 5.54   | 4.46   | 3.66   | 3.40   | 3.85   | 4.53   | 5.71   | 7.03   | 8.40   |
| 1.61                        | 5.02   | 6.34   | 7.24   | 7.50   | 7.55   | 7.07   | 6.71   | 6.05   | 5.77   | 5.62   | 5.69   |

|      |      |      |      |      |      |      |      |      |      |      |      |
|------|------|------|------|------|------|------|------|------|------|------|------|
| 1.66 | 2.99 | 2.93 | 3.35 | 4.22 | 5.49 | 6.76 | 8.02 | 8.95 | 9.67 | 9.99 | 9.87 |
| 1.71 | 6.97 | 7.50 | 7.50 | 7.18 | 6.63 | 5.89 | 5.35 | 5.05 | 5.08 | 5.28 | 5.80 |
| 1.76 | 3.30 | 4.28 | 5.27 | 6.37 | 7.30 | 8.01 | 8.24 | 8.17 | 7.94 | 7.48 | 7.00 |
| 1.81 | 3.98 | 3.18 | 2.73 | 2.72 | 3.03 | 3.69 | 4.55 | 5.57 | 6.60 | 7.26 | 7.98 |
| 1.86 | 5.69 | 5.99 | 6.09 | 5.95 | 5.70 | 5.36 | 5.11 | 5.14 | 5.31 | 5.79 | 6.38 |
| 1.91 | 2.69 | 3.16 | 3.92 | 5.03 | 6.06 | 6.97 | 7.59 | 7.82 | 7.89 | 7.66 | 7.27 |
| 1.96 | 5.62 | 5.12 | 4.53 | 4.00 | 3.65 | 3.69 | 4.00 | 4.61 | 5.33 | 6.05 | 6.94 |
| 2.01 | 3.75 | 4.78 | 5.76 | 6.46 | 6.70 | 6.69 | 6.41 | 5.91 | 5.54 | 5.29 | 5.17 |
| 2.06 | 3.26 | 3.15 | 3.14 | 3.55 | 4.21 | 4.98 | 5.97 | 6.72 | 7.34 | 7.82 | 8.05 |
| 2.11 | 5.25 | 5.28 | 5.00 | 4.77 | 4.60 | 4.40 | 4.50 | 4.65 | 5.10 | 5.58 | 6.15 |
| 2.16 | 3.36 | 4.16 | 4.88 | 5.72 | 6.36 | 6.63 | 6.79 | 6.68 | 6.50 | 6.25 | 6.08 |
| 2.21 | 3.77 | 3.38 | 3.16 | 3.22 | 3.60 | 4.08 | 4.90 | 5.75 | 6.67 | 7.33 | 7.94 |
| 2.26 | 4.89 | 5.53 | 6.00 | 5.92 | 5.89 | 5.67 | 5.43 | 5.28 | 5.33 | 5.56 | 5.87 |
| 2.31 | 2.92 | 3.26 | 3.75 | 4.40 | 5.01 | 5.63 | 6.33 | 6.69 | 6.86 | 6.91 | 6.83 |
| 2.36 | 3.53 | 3.43 | 3.40 | 3.54 | 3.89 | 4.18 | 4.78 | 5.18 | 5.74 | 6.22 | 6.69 |
| 2.41 | 4.20 | 5.07 | 5.40 | 5.60 | 5.74 | 5.63 | 5.54 | 5.34 | 5.33 | 5.37 | 5.66 |
| 2.46 | 2.87 | 2.91 | 3.08 | 3.55 | 4.10 | 4.82 | 5.39 | 5.98 | 6.52 | 6.77 | 6.88 |
| 2.51 | 5.32 | 5.61 | 5.45 | 5.31 | 4.99 | 4.64 | 4.54 | 4.63 | 4.86 | 5.37 | 5.97 |
| 2.56 | 3.56 | 4.22 | 4.86 | 5.33 | 5.79 | 6.06 | 6.25 | 6.31 | 6.38 | 6.39 | 6.40 |
| 2.61 | 3.01 | 3.14 | 3.38 | 3.95 | 4.49 | 5.06 | 5.62 | 6.07 | 6.54 | 6.83 | 7.00 |
| 2.66 | 4.85 | 5.02 | 5.20 | 5.20 | 5.13 | 4.97 | 5.03 | 5.21 | 5.51 | 5.81 | 6.32 |
| 2.71 | 3.08 | 3.59 | 4.23 | 4.80 | 5.34 | 5.78 | 6.07 | 6.22 | 6.45 | 6.34 | 6.33 |
| 2.76 | 4.09 | 4.07 | 3.95 | 4.00 | 4.19 | 4.51 | 4.91 | 5.47 | 6.04 | 6.50 | 7.00 |
| 2.81 | 3.97 | 4.38 | 4.74 | 4.93 | 5.06 | 5.16 | 5.09 | 5.27 | 5.35 | 5.52 | 5.78 |
| 2.86 | 2.75 | 3.17 | 3.55 | 4.04 | 4.60 | 5.01 | 5.36 | 5.63 | 5.82 | 5.99 | 6.08 |
| 2.91 | 4.34 | 4.36 | 4.43 | 4.42 | 4.42 | 4.53 | 4.76 | 5.09 | 5.55 | 5.96 | 6.47 |
| 2.96 | 3.48 | 4.10 | 4.49 | 5.03 | 5.32 | 5.48 | 5.59 | 5.64 | 5.74 | 5.84 | 5.99 |
| 3.01 | 3.64 | 3.63 | 3.66 | 3.83 | 4.16 | 4.68 | 5.05 | 5.63 | 6.13 | 6.57 | 6.89 |
| 3.06 | 3.78 | 4.13 | 4.20 | 4.40 | 4.49 | 4.53 | 4.66 | 4.72 | 5.04 | 5.37 | 5.59 |
| 3.11 | 3.17 | 3.56 | 3.94 | 4.36 | 4.78 | 5.09 | 5.32 | 5.47 | 5.69 | 5.82 | 5.98 |
| 3.16 | 3.68 | 3.71 | 3.78 | 3.97 | 4.18 | 4.53 | 4.95 | 5.39 | 5.94 | 6.27 | 6.65 |
| 3.21 | 4.08 | 4.35 | 4.54 | 4.77 | 4.87 | 4.99 | 5.04 | 5.33 | 5.57 | 5.83 | 6.16 |
| 3.26 | 3.23 | 3.60 | 4.00 | 4.34 | 4.92 | 5.25 | 5.65 | 5.98 | 6.22 | 6.36 | 6.52 |
| 3.31 | 4.07 | 4.23 | 4.23 | 4.32 | 4.58 | 4.79 | 5.12 | 5.51 | 5.83 | 6.26 | 6.62 |
| 3.36 | 3.79 | 4.30 | 4.56 | 4.89 | 5.04 | 5.28 | 5.38 | 5.52 | 5.71 | 6.01 | 6.21 |
| 3.41 | 3.37 | 3.58 | 3.85 | 4.25 | 4.70 | 5.10 | 5.54 | 5.86 | 6.19 | 6.48 | 6.71 |
| 3.46 | 4.05 | 4.26 | 4.31 | 4.42 | 4.55 | 4.77 | 4.92 | 5.34 | 5.59 | 5.98 | 6.45 |
| 3.51 | 3.43 | 3.83 | 4.18 | 4.66 | 5.00 | 5.32 | 5.61 | 5.91 | 6.10 | 6.21 | 6.43 |
| 3.56 | 3.62 | 3.67 | 3.79 | 4.06 | 4.40 | 4.70 | 5.10 | 5.52 | 5.89 | 6.25 | 6.57 |
| 3.61 | 3.54 | 3.77 | 3.93 | 4.14 | 4.28 | 4.41 | 4.66 | 4.83 | 5.24 | 5.49 | 5.80 |
| 3.66 | 3.04 | 3.46 | 3.74 | 4.16 | 4.58 | 4.91 | 5.26 | 5.58 | 5.80 | 5.99 | 6.13 |
| 3.71 | 3.92 | 4.12 | 4.19 | 4.29 | 4.49 | 4.64 | 4.97 | 5.36 | 5.73 | 6.08 | 6.45 |
| 3.76 | 4.11 | 4.42 | 4.63 | 5.01 | 5.22 | 5.37 | 5.67 | 5.80 | 6.13 | 6.33 | 6.61 |
| 3.81 | 3.18 | 3.40 | 3.59 | 3.99 | 4.36 | 4.70 | 5.01 | 5.42 | 5.67 | 5.95 | 6.09 |
| 3.86 | 3.31 | 3.48 | 3.60 | 3.85 | 3.97 | 4.13 | 4.37 | 4.68 | 5.03 | 5.45 | 5.75 |
| 3.91 | 3.43 | 3.84 | 4.11 | 4.52 | 4.85 | 5.09 | 5.47 | 5.68 | 5.87 | 6.08 | 6.27 |
| 3.96 | 3.42 | 3.62 | 3.75 | 4.02 | 4.32 | 4.71 | 5.02 | 5.43 | 5.79 | 6.11 | 6.35 |
| 4.01 | 4.18 | 4.46 | 4.72 | 4.92 | 5.12 | 5.18 | 5.42 | 5.69 | 5.92 | 6.21 | 6.56 |
| 4.06 | 3.51 | 3.78 | 4.17 | 4.45 | 4.82 | 5.13 | 5.50 | 5.76 | 6.05 | 6.28 | 6.42 |
| 4.11 | 3.31 | 3.52 | 3.73 | 3.92 | 4.21 | 4.46 | 4.91 | 5.19 | 5.54 | 5.93 | 6.22 |

|      |      |      |      |      |      |      |      |      |      |      |      |
|------|------|------|------|------|------|------|------|------|------|------|------|
| 4.16 | 3.92 | 4.22 | 4.50 | 4.81 | 5.01 | 5.18 | 5.44 | 5.66 | 5.90 | 6.13 | 6.37 |
| 4.21 | 3.67 | 3.98 | 4.09 | 4.40 | 4.73 | 5.12 | 5.50 | 5.86 | 6.19 | 6.43 | 6.73 |
| 4.26 | 3.89 | 4.09 | 4.25 | 4.47 | 4.76 | 4.97 | 5.15 | 5.50 | 5.80 | 6.17 | 6.47 |
| 4.31 | 3.16 | 3.46 | 3.82 | 4.12 | 4.47 | 4.64 | 4.99 | 5.16 | 5.52 | 5.64 | 5.85 |
| 4.36 | 3.18 | 3.46 | 3.73 | 4.07 | 4.34 | 4.72 | 4.94 | 5.36 | 5.65 | 5.83 | 6.15 |
| 4.41 | 3.56 | 3.81 | 3.97 | 4.28 | 4.46 | 4.68 | 4.95 | 5.21 | 5.49 | 5.76 | 6.10 |
| 4.46 | 3.67 | 4.00 | 4.32 | 4.67 | 4.90 | 5.32 | 5.58 | 5.86 | 6.09 | 6.26 | 6.55 |
| 4.51 | 3.55 | 3.77 | 3.91 | 4.15 | 4.44 | 4.68 | 5.08 | 5.36 | 5.78 | 6.11 | 6.29 |
| 4.56 | 3.41 | 3.73 | 4.04 | 4.17 | 4.46 | 4.69 | 4.92 | 5.09 | 5.44 | 5.68 | 6.07 |
| 4.61 | 2.87 | 3.16 | 3.44 | 3.75 | 4.06 | 4.28 | 4.64 | 4.89 | 5.17 | 5.42 | 5.72 |
| 4.66 | 3.67 | 3.88 | 4.12 | 4.37 | 4.65 | 4.87 | 5.11 | 5.41 | 5.81 | 6.13 | 6.42 |
| 4.71 | 3.75 | 4.03 | 4.29 | 4.59 | 4.93 | 5.04 | 5.40 | 5.60 | 5.85 | 6.09 | 6.30 |
| 4.76 | 3.65 | 3.89 | 4.18 | 4.54 | 4.80 | 5.17 | 5.50 | 5.84 | 6.13 | 6.46 | 6.67 |
| 4.81 | 3.49 | 3.75 | 3.89 | 4.03 | 4.45 | 4.60 | 4.86 | 5.11 | 5.48 | 5.72 | 6.04 |
| 4.86 | 3.06 | 3.45 | 3.69 | 4.03 | 4.26 | 4.47 | 4.85 | 5.00 | 5.28 | 5.50 | 5.84 |
| 4.91 | 3.75 | 3.95 | 4.22 | 4.43 | 4.85 | 5.12 | 5.48 | 5.68 | 6.04 | 6.29 | 6.68 |
| 4.96 | 3.42 | 3.83 | 4.01 | 4.27 | 4.58 | 4.77 | 5.09 | 5.25 | 5.61 | 5.87 | 6.13 |
| 5.01 | 3.46 | 3.77 | 4.04 | 4.30 | 4.70 | 4.97 | 5.30 | 5.55 | 5.89 | 6.10 | 6.40 |
| 5.06 | 3.32 | 3.59 | 3.71 | 3.88 | 4.23 | 4.43 | 4.71 | 5.00 | 5.40 | 5.78 | 5.96 |
| 5.11 | 3.35 | 3.59 | 3.81 | 4.12 | 4.44 | 4.62 | 4.99 | 5.17 | 5.56 | 5.79 | 6.06 |
| 5.16 | 3.22 | 3.54 | 3.81 | 4.10 | 4.48 | 4.69 | 4.98 | 5.34 | 5.57 | 5.87 | 6.03 |
| 5.21 | 3.07 | 3.39 | 3.51 | 3.77 | 4.14 | 4.28 | 4.68 | 4.92 | 5.27 | 5.48 | 5.90 |
| 5.26 | 3.70 | 3.84 | 4.13 | 4.49 | 4.84 | 5.11 | 5.35 | 5.61 | 5.97 | 6.13 | 6.45 |
| 5.31 | 3.29 | 3.56 | 3.79 | 4.00 | 4.25 | 4.68 | 4.96 | 5.31 | 5.58 | 5.92 | 6.27 |
| 5.38 | 3.04 | 3.30 | 3.49 | 3.80 | 4.12 | 4.38 | 4.76 | 5.04 | 5.40 | 5.69 | 5.92 |
| 5.45 | 3.61 | 3.86 | 4.11 | 4.50 | 4.70 | 4.90 | 5.26 | 5.57 | 5.97 | 6.22 | 6.48 |
| 5.53 | 3.12 | 3.39 | 3.61 | 3.91 | 4.22 | 4.42 | 4.68 | 5.00 | 5.33 | 5.72 | 6.12 |
| 5.61 | 3.54 | 3.89 | 4.11 | 4.41 | 4.63 | 4.88 | 5.23 | 5.46 | 5.76 | 6.13 | 6.37 |
| 5.70 | 3.35 | 3.59 | 3.80 | 4.05 | 4.49 | 4.66 | 4.97 | 5.29 | 5.57 | 5.89 | 6.23 |
| 5.80 | 3.28 | 3.61 | 3.93 | 4.22 | 4.48 | 4.70 | 4.96 | 5.25 | 5.53 | 5.83 | 6.15 |
| 5.90 | 3.47 | 3.69 | 3.97 | 4.24 | 4.53 | 4.73 | 5.01 | 5.27 | 5.62 | 5.92 | 6.21 |
| 6.01 | 3.72 | 3.90 | 4.24 | 4.43 | 4.71 | 4.96 | 5.27 | 5.55 | 5.84 | 6.13 | 6.48 |
| 6.13 | 3.59 | 3.82 | 4.09 | 4.34 | 4.68 | 4.89 | 5.09 | 5.45 | 5.79 | 6.01 | 6.32 |
| 6.25 | 3.43 | 3.76 | 3.91 | 4.24 | 4.48 | 4.78 | 5.07 | 5.41 | 5.79 | 5.96 | 6.23 |
| 6.39 | 3.64 | 3.94 | 4.32 | 4.56 | 4.88 | 5.19 | 5.48 | 5.74 | 5.96 | 6.27 | 6.57 |
| 6.53 | 3.63 | 3.98 | 4.24 | 4.52 | 4.90 | 5.11 | 5.36 | 5.68 | 5.95 | 6.24 | 6.42 |
| 6.69 | 3.88 | 4.15 | 4.43 | 4.70 | 5.08 | 5.39 | 5.64 | 5.96 | 6.24 | 6.50 | 6.77 |
| 6.85 | 3.65 | 3.96 | 4.15 | 4.40 | 4.69 | 4.94 | 5.28 | 5.69 | 5.93 | 6.15 | 6.35 |
| 7.03 | 3.68 | 3.88 | 4.21 | 4.48 | 4.82 | 5.13 | 5.32 | 5.62 | 5.93 | 6.18 | 6.43 |
| 7.21 | 3.77 | 4.10 | 4.38 | 4.68 | 5.02 | 5.29 | 5.57 | 5.88 | 6.12 | 6.37 | 6.72 |
| 7.41 | 3.83 | 4.18 | 4.35 | 4.65 | 5.07 | 5.29 | 5.53 | 5.86 | 6.17 | 6.49 | 6.69 |
| 7.63 | 3.72 | 3.99 | 4.32 | 4.61 | 4.95 | 5.24 | 5.53 | 5.79 | 6.11 | 6.47 | 6.77 |
| 7.86 | 3.86 | 4.11 | 4.38 | 4.62 | 5.01 | 5.24 | 5.55 | 5.84 | 6.16 | 6.42 | 6.67 |
| 8.10 | 3.61 | 3.86 | 4.10 | 4.41 | 4.72 | 5.09 | 5.28 | 5.55 | 5.89 | 6.14 | 6.42 |
| 8.36 | 3.37 | 3.58 | 3.94 | 4.21 | 4.55 | 4.80 | 5.16 | 5.39 | 5.71 | 5.98 | 6.28 |
| 8.64 | 3.84 | 4.21 | 4.35 | 4.74 | 5.04 | 5.25 | 5.64 | 5.86 | 6.20 | 6.48 | 6.85 |
| 8.94 | 3.99 | 4.35 | 4.50 | 4.82 | 5.14 | 5.42 | 5.76 | 6.10 | 6.31 | 6.68 | 6.93 |
| 9.26 | 4.24 | 4.54 | 4.78 | 5.07 | 5.36 | 5.72 | 6.03 | 6.34 | 6.68 | 6.94 | 7.22 |
| 9.60 | 3.75 | 4.11 | 4.39 | 4.71 | 5.01 | 5.32 | 5.60 | 5.79 | 6.11 | 6.52 | 6.64 |
| 9.97 | 3.63 | 3.91 | 4.19 | 4.53 | 4.81 | 5.14 | 5.39 | 5.70 | 6.01 | 6.29 | 6.56 |

|        |      |      |      |      |      |      |      |      |      |      |      |
|--------|------|------|------|------|------|------|------|------|------|------|------|
| 10.36  | 4.07 | 4.41 | 4.69 | 4.93 | 5.28 | 5.53 | 5.80 | 6.08 | 6.38 | 6.67 | 6.94 |
| 10.77  | 3.92 | 4.25 | 4.46 | 4.78 | 5.09 | 5.33 | 5.71 | 5.98 | 6.36 | 6.59 | 6.89 |
| 11.22  | 3.98 | 4.29 | 4.54 | 4.86 | 5.15 | 5.42 | 5.75 | 6.08 | 6.32 | 6.57 | 6.83 |
| 11.70  | 4.06 | 4.30 | 4.51 | 4.84 | 5.21 | 5.47 | 5.93 | 6.19 | 6.41 | 6.68 | 6.90 |
| 12.21  | 3.55 | 3.92 | 4.13 | 4.45 | 4.76 | 5.04 | 5.32 | 5.52 | 5.87 | 6.09 | 6.38 |
| 12.75  | 3.87 | 4.16 | 4.40 | 4.75 | 5.07 | 5.34 | 5.62 | 5.83 | 6.09 | 6.42 | 6.78 |
| 13.33  | 3.99 | 4.31 | 4.52 | 4.78 | 5.12 | 5.49 | 5.76 | 5.94 | 6.35 | 6.62 | 6.93 |
| 13.95  | 3.82 | 4.14 | 4.37 | 4.67 | 5.07 | 5.33 | 5.69 | 5.94 | 6.14 | 6.48 | 6.73 |
| 14.62  | 3.60 | 3.91 | 4.23 | 4.52 | 4.84 | 5.16 | 5.44 | 5.62 | 6.06 | 6.20 | 6.52 |
| 15.33  | 3.54 | 3.81 | 4.09 | 4.38 | 4.73 | 4.99 | 5.34 | 5.57 | 5.88 | 6.25 | 6.40 |
| 16.09  | 3.59 | 3.98 | 4.19 | 4.46 | 4.84 | 5.11 | 5.35 | 5.54 | 5.95 | 6.23 | 6.40 |
| 16.90  | 3.58 | 3.69 | 4.06 | 4.35 | 4.62 | 4.94 | 5.29 | 5.56 | 5.90 | 6.18 | 6.41 |
| 17.77  | 3.80 | 4.04 | 4.31 | 4.57 | 4.96 | 5.19 | 5.56 | 5.79 | 6.08 | 6.40 | 6.61 |
| 18.70  | 3.71 | 4.09 | 4.40 | 4.64 | 4.99 | 5.21 | 5.56 | 5.75 | 6.07 | 6.31 | 6.54 |
| 19.69  | 3.62 | 3.90 | 4.18 | 4.46 | 4.84 | 4.96 | 5.39 | 5.57 | 5.96 | 6.15 | 6.46 |
| 20.75  | 3.60 | 3.74 | 4.13 | 4.42 | 4.69 | 5.01 | 5.31 | 5.62 | 5.81 | 6.08 | 6.36 |
| 21.89  | 3.91 | 4.18 | 4.48 | 4.72 | 5.11 | 5.38 | 5.70 | 5.92 | 6.29 | 6.59 | 6.87 |
| 23.10  | 4.17 | 4.53 | 4.72 | 5.00 | 5.31 | 5.67 | 5.88 | 6.21 | 6.62 | 6.80 | 7.11 |
| 24.39  | 3.76 | 4.14 | 4.45 | 4.70 | 4.99 | 5.38 | 5.57 | 5.87 | 6.12 | 6.42 | 6.67 |
| 25.78  | 3.68 | 4.00 | 4.30 | 4.51 | 4.80 | 5.12 | 5.45 | 5.65 | 6.03 | 6.33 | 6.60 |
| 27.26  | 3.78 | 4.01 | 4.31 | 4.54 | 4.85 | 5.27 | 5.43 | 5.76 | 6.10 | 6.41 | 6.66 |
| 28.84  | 3.64 | 4.04 | 4.29 | 4.54 | 4.84 | 5.16 | 5.48 | 5.72 | 6.03 | 6.35 | 6.65 |
| 30.53  | 3.80 | 4.13 | 4.46 | 4.79 | 5.03 | 5.27 | 5.59 | 5.81 | 6.07 | 6.34 | 6.72 |
| 32.34  | 3.57 | 3.82 | 4.07 | 4.36 | 4.73 | 4.84 | 5.19 | 5.49 | 5.79 | 5.92 | 6.26 |
| 34.27  | 3.74 | 4.15 | 4.38 | 4.68 | 4.92 | 5.26 | 5.45 | 5.71 | 5.99 | 6.30 | 6.45 |
| 36.34  | 3.61 | 3.93 | 4.20 | 4.49 | 4.76 | 5.08 | 5.34 | 5.60 | 5.80 | 5.99 | 6.29 |
| 38.55  | 3.63 | 4.05 | 4.19 | 4.53 | 4.86 | 5.10 | 5.39 | 5.59 | 5.96 | 6.17 | 6.44 |
| 40.91  | 3.74 | 4.00 | 4.26 | 4.51 | 4.93 | 5.13 | 5.45 | 5.64 | 6.02 | 6.31 | 6.48 |
| 43.43  | 3.39 | 3.68 | 3.94 | 4.21 | 4.46 | 4.79 | 5.06 | 5.28 | 5.58 | 5.85 | 6.04 |
| 46.13  | 3.66 | 3.96 | 4.20 | 4.52 | 4.76 | 5.01 | 5.38 | 5.60 | 5.91 | 6.13 | 6.34 |
| 49.01  | 3.66 | 3.97 | 4.27 | 4.54 | 4.84 | 5.08 | 5.34 | 5.54 | 5.85 | 6.13 | 6.41 |
| 52.09  | 3.30 | 3.59 | 3.94 | 4.25 | 4.54 | 4.76 | 5.07 | 5.28 | 5.54 | 5.81 | 6.09 |
| 55.39  | 3.52 | 3.71 | 4.01 | 4.30 | 4.58 | 4.78 | 5.09 | 5.31 | 5.61 | 5.80 | 6.07 |
| 58.91  | 3.29 | 3.58 | 3.87 | 4.17 | 4.38 | 4.62 | 4.98 | 5.10 | 5.47 | 5.70 | 5.90 |
| 62.68  | 3.11 | 3.30 | 3.62 | 3.85 | 4.22 | 4.44 | 4.69 | 4.89 | 5.23 | 5.48 | 5.68 |
| 66.70  | 3.33 | 3.70 | 3.87 | 4.18 | 4.44 | 4.69 | 4.95 | 5.21 | 5.49 | 5.72 | 5.95 |
| 71.00  | 3.05 | 3.32 | 3.57 | 3.91 | 4.11 | 4.32 | 4.58 | 4.89 | 5.23 | 5.43 | 5.66 |
| 75.60  | 3.20 | 3.54 | 3.76 | 4.10 | 4.30 | 4.59 | 4.77 | 5.07 | 5.30 | 5.62 | 5.82 |
| 80.51  | 3.32 | 3.53 | 3.87 | 4.07 | 4.33 | 4.48 | 4.72 | 4.90 | 5.28 | 5.46 | 5.73 |
| 85.77  | 2.82 | 3.22 | 3.41 | 3.71 | 3.99 | 4.25 | 4.45 | 4.66 | 4.94 | 5.28 | 5.57 |
| 91.38  | 3.48 | 3.82 | 3.98 | 4.30 | 4.57 | 4.81 | 4.99 | 5.18 | 5.58 | 5.78 | 6.07 |
| 97.39  | 2.90 | 3.24 | 3.43 | 3.66 | 3.91 | 4.11 | 4.36 | 4.51 | 4.77 | 4.95 | 5.32 |
| 103.80 | 3.33 | 3.63 | 3.92 | 4.12 | 4.37 | 4.62 | 5.02 | 5.10 | 5.45 | 5.74 | 5.91 |
| 110.66 | 3.29 | 3.51 | 3.82 | 4.02 | 4.30 | 4.44 | 4.73 | 4.96 | 5.19 | 5.44 | 5.60 |
| 117.99 | 2.87 | 3.16 | 3.28 | 3.54 | 3.81 | 4.07 | 4.29 | 4.43 | 4.66 | 5.09 | 5.25 |
| 125.83 | 3.53 | 3.70 | 3.94 | 4.25 | 4.48 | 4.69 | 4.86 | 5.22 | 5.42 | 5.58 | 5.77 |
| 134.21 | 3.04 | 3.38 | 3.63 | 3.85 | 4.09 | 4.32 | 4.52 | 4.65 | 4.90 | 5.09 | 5.38 |
| 143.17 | 2.88 | 3.13 | 3.34 | 3.61 | 3.76 | 3.99 | 4.21 | 4.37 | 4.64 | 4.89 | 5.13 |
| 152.74 | 3.16 | 3.45 | 3.75 | 3.94 | 4.22 | 4.52 | 4.76 | 4.92 | 5.24 | 5.57 | 5.68 |
| 162.97 | 3.14 | 3.45 | 3.78 | 4.06 | 4.49 | 4.71 | 5.14 | 5.40 | 5.81 | 6.09 | 6.47 |



|         |      |      |      |      |      |      |      |      |      |      |      |
|---------|------|------|------|------|------|------|------|------|------|------|------|
| 173.91  | 3.00 | 3.38 | 3.57 | 3.93 | 4.24 | 4.54 | 4.93 | 5.26 | 5.55 | 5.88 | 6.26 |
| 185.60  | 3.16 | 3.58 | 3.81 | 4.17 | 4.45 | 4.77 | 5.17 | 5.46 | 5.67 | 6.12 | 6.43 |
| 198.10  | 2.92 | 3.18 | 3.61 | 3.90 | 4.17 | 4.57 | 4.92 | 5.21 | 5.50 | 5.80 | 6.18 |
| 211.46  | 3.18 | 3.52 | 3.76 | 4.00 | 4.48 | 4.78 | 5.16 | 5.37 | 5.80 | 6.17 | 6.45 |
| 225.75  | 3.05 | 3.35 | 3.69 | 4.05 | 4.41 | 4.63 | 5.06 | 5.31 | 5.62 | 5.93 | 6.32 |
| 241.01  | 2.98 | 3.25 | 3.60 | 3.92 | 4.14 | 4.53 | 4.80 | 5.07 | 5.47 | 5.74 | 6.14 |
| 257.33  | 2.81 | 3.26 | 3.42 | 3.79 | 4.11 | 4.41 | 4.78 | 5.02 | 5.41 | 5.75 | 6.01 |
| 274.77  | 3.17 | 3.55 | 3.81 | 4.22 | 4.60 | 4.83 | 5.19 | 5.46 | 5.83 | 6.13 | 6.46 |
| 293.42  | 2.98 | 3.24 | 3.63 | 3.90 | 4.23 | 4.56 | 4.90 | 5.21 | 5.63 | 5.97 | 6.28 |
| 313.35  | 2.98 | 3.27 | 3.49 | 4.00 | 4.29 | 4.44 | 4.88 | 5.15 | 5.57 | 5.89 | 6.22 |
| 334.66  | 3.09 | 3.44 | 3.67 | 4.08 | 4.41 | 4.66 | 5.08 | 5.44 | 5.74 | 6.05 | 6.45 |
| 357.43  | 2.79 | 3.10 | 3.38 | 3.72 | 4.11 | 4.47 | 4.76 | 4.99 | 5.39 | 5.72 | 6.12 |
| 381.78  | 3.11 | 3.40 | 3.74 | 4.09 | 4.45 | 4.73 | 5.10 | 5.40 | 5.71 | 6.04 | 6.41 |
| 407.80  | 2.81 | 3.13 | 3.42 | 3.78 | 4.13 | 4.53 | 4.76 | 5.10 | 5.49 | 5.80 | 6.10 |
| 435.62  | 2.82 | 3.14 | 3.54 | 3.88 | 4.18 | 4.58 | 4.87 | 5.24 | 5.62 | 5.99 | 6.25 |
| 465.35  | 2.93 | 3.24 | 3.60 | 3.88 | 4.20 | 4.62 | 4.92 | 5.25 | 5.65 | 5.91 | 6.19 |
| 497.14  | 2.73 | 3.01 | 3.23 | 3.55 | 3.95 | 4.26 | 4.58 | 4.94 | 5.21 | 5.60 | 5.85 |
| 531.11  | 2.61 | 2.92 | 3.24 | 3.61 | 4.00 | 4.28 | 4.62 | 5.02 | 5.33 | 5.61 | 5.91 |
| 567.43  | 2.77 | 3.25 | 3.45 | 3.81 | 4.22 | 4.49 | 4.86 | 5.24 | 5.56 | 5.87 | 6.19 |
| 606.26  | 2.49 | 2.81 | 3.21 | 3.58 | 3.87 | 4.20 | 4.55 | 4.85 | 5.17 | 5.59 | 5.92 |
| 647.76  | 2.80 | 3.16 | 3.45 | 3.80 | 4.20 | 4.41 | 4.84 | 5.18 | 5.53 | 5.85 | 6.14 |
| 692.12  | 2.36 | 2.77 | 3.05 | 3.36 | 3.72 | 4.01 | 4.39 | 4.62 | 5.04 | 5.32 | 5.69 |
| 739.53  | 2.84 | 3.28 | 3.49 | 3.92 | 4.20 | 4.63 | 4.91 | 5.18 | 5.53 | 5.86 | 6.15 |
| 790.22  | 2.26 | 2.52 | 2.98 | 3.29 | 3.66 | 3.86 | 4.30 | 4.55 | 4.88 | 5.24 | 5.68 |
| 844.40  | 2.42 | 2.70 | 3.06 | 3.37 | 3.73 | 4.00 | 4.35 | 4.71 | 5.19 | 5.44 | 5.81 |
| 902.32  | 2.67 | 3.03 | 3.34 | 3.71 | 4.07 | 4.29 | 4.70 | 5.03 | 5.46 | 5.71 | 6.07 |
| 964.23  | 2.13 | 2.55 | 2.84 | 3.21 | 3.56 | 3.77 | 4.18 | 4.44 | 4.79 | 5.18 | 5.46 |
| 1030.41 | 3.03 | 3.43 | 3.70 | 4.03 | 4.42 | 4.72 | 5.00 | 5.40 | 5.73 | 6.02 | 6.28 |
| 1101.15 | 2.60 | 2.95 | 3.27 | 3.56 | 3.97 | 4.26 | 4.68 | 4.93 | 5.33 | 5.67 | 5.94 |
| 1176.77 | 2.78 | 3.10 | 3.48 | 3.77 | 4.14 | 4.53 | 4.88 | 5.12 | 5.56 | 5.85 | 6.08 |
| 1257.60 | 2.78 | 3.20 | 3.45 | 3.87 | 4.21 | 4.57 | 4.82 | 5.21 | 5.52 | 5.97 | 6.16 |
| 1344.00 | 2.46 | 2.78 | 3.09 | 3.44 | 3.90 | 4.16 | 4.52 | 4.82 | 5.17 | 5.47 | 5.86 |
| 1436.36 | 2.83 | 3.18 | 3.47 | 3.82 | 4.26 | 4.54 | 4.99 | 5.17 | 5.53 | 5.79 | 6.06 |
| 1535.09 | 2.66 | 2.92 | 3.24 | 3.70 | 3.99 | 4.29 | 4.64 | 5.02 | 5.37 | 5.73 | 5.96 |
| 1640.63 | 2.20 | 2.61 | 2.88 | 3.26 | 3.53 | 3.95 | 4.27 | 4.63 | 4.98 | 5.19 | 5.58 |
| 1753.44 | 2.49 | 2.82 | 3.11 | 3.44 | 3.77 | 4.15 | 4.51 | 4.75 | 5.24 | 5.51 | 5.79 |
| 1874.02 | 2.09 | 2.55 | 2.75 | 3.10 | 3.51 | 3.82 | 4.18 | 4.41 | 4.86 | 5.19 | 5.52 |
| 2002.92 | 2.54 | 2.83 | 3.09 | 3.41 | 3.83 | 4.18 | 4.53 | 4.88 | 5.21 | 5.54 | 5.85 |
| 2140.71 | 2.02 | 2.42 | 2.74 | 3.11 | 3.45 | 3.80 | 4.16 | 4.46 | 4.82 | 5.16 | 5.38 |
| 2288.00 | 2.13 | 2.43 | 2.76 | 3.11 | 3.45 | 3.82 | 4.18 | 4.42 | 4.76 | 5.09 | 5.45 |
| 2445.44 | 1.93 | 2.25 | 2.53 | 2.92 | 3.23 | 3.52 | 3.93 | 4.19 | 4.62 | 4.91 | 5.20 |
| 2613.73 | 1.97 | 2.41 | 2.59 | 3.01 | 3.26 | 3.62 | 4.01 | 4.36 | 4.74 | 5.04 | 5.46 |
| 2793.63 | 2.26 | 2.51 | 2.76 | 3.12 | 3.46 | 3.80 | 4.17 | 4.42 | 4.83 | 5.16 | 5.50 |
| 2985.93 | 1.55 | 1.84 | 2.12 | 2.44 | 2.72 | 3.00 | 3.28 | 3.73 | 4.04 | 4.41 | 4.78 |
| 3191.49 | 1.74 | 2.06 | 2.32 | 2.61 | 3.02 | 3.28 | 3.71 | 4.02 | 4.31 | 4.65 | 5.04 |
| 3411.21 | 1.75 | 1.98 | 2.13 | 2.47 | 2.86 | 3.11 | 3.44 | 3.75 | 4.17 | 4.43 | 4.82 |
| 3646.09 | 1.60 | 1.88 | 2.13 | 2.38 | 2.71 | 3.02 | 3.35 | 3.65 | 4.11 | 4.43 | 4.83 |
| 3897.16 | 1.71 | 1.99 | 2.28 | 2.48 | 2.80 | 3.09 | 3.47 | 3.76 | 4.24 | 4.46 | 4.90 |

| Time<br>(ps) | Wavelength<br>(nm) |            |        |        |        |            |            |            |            |            |            |
|--------------|--------------------|------------|--------|--------|--------|------------|------------|------------|------------|------------|------------|
|              | 522.0<br>6         | 523.4<br>9 | 524.91 | 526.34 | 527.76 | 529.1<br>8 | 530.6<br>1 | 532.0<br>3 | 533.4<br>6 | 534.8<br>8 | 536.3<br>0 |
| -2.74        | -0.39              | -0.30      | -0.30  | -0.26  | -0.21  | -0.15      | -0.10      | -0.09      | -0.15      | -0.03      | -0.06      |
| -2.24        | -0.07              | -0.10      | -0.17  | -0.07  | -0.09  | -0.11      | -0.08      | -0.07      | -0.07      | -0.09      | -0.05      |
| -1.74        | -0.28              | -0.36      | -0.21  | -0.18  | -0.20  | -0.26      | -0.20      | -0.21      | -0.10      | -0.12      | -0.07      |
| -1.24        | -0.02              | 0.05       | 0.10   | -0.03  | 0.07   | 0.01       | -0.01      | 0.07       | 0.01       | -0.03      | -0.08      |
| -0.74        | 0.31               | 0.25       | 0.26   | 0.23   | 0.22   | 0.19       | 0.20       | 0.22       | 0.17       | 0.13       | 0.15       |
| -0.24        | 0.19               | 0.12       | 0.08   | 0.19   | 0.02   | 0.14       | 0.03       | 0.05       | 0.06       | 0.00       | -0.01      |
| -0.14        | 0.20               | 0.28       | 0.21   | 0.18   | 0.17   | 0.16       | 0.17       | 0.02       | 0.07       | 0.12       | 0.09       |
| -0.04        | 0.05               | 0.07       | 0.03   | -0.05  | 0.01   | 0.03       | -0.01      | 0.01       | 0.03       | 0.03       | 0.02       |
| 0.06         | 0.11               | 0.12       | 0.13   | 0.06   | 0.06   | -0.04      | 0.00       | 0.03       | 0.06       | -0.01      | 0.00       |
| 0.16         | 0.30               | 0.30       | 0.26   | 0.30   | 0.34   | 0.20       | 0.25       | 0.19       | 0.18       | 0.17       | 0.14       |
| 0.26         | 0.18               | 0.12       | 0.17   | 0.16   | 0.18   | 0.13       | 0.08       | 0.14       | 0.19       | -0.02      | 0.02       |
| 0.31         | 0.13               | 0.21       | 0.17   | 0.21   | 0.23   | 0.10       | 0.09       | 0.18       | 0.07       | 0.04       | 0.09       |
| 0.36         | -0.01              | -0.01      | -0.03  | -0.08  | -0.08  | -0.10      | -0.07      | 0.00       | -0.04      | -0.11      | -0.07      |
| 0.41         | 0.13               | 0.12       | 0.10   | 0.02   | 0.08   | -0.03      | 0.01       | 0.02       | -0.03      | -0.11      | -0.02      |
| 0.46         | 0.31               | 0.23       | 0.32   | 0.25   | 0.27   | 0.25       | 0.19       | 0.23       | 0.21       | 0.13       | 0.20       |
| 0.51         | 0.09               | 0.07       | 0.04   | 0.13   | 0.07   | 0.06       | -0.08      | 0.10       | 0.06       | 0.04       | -0.01      |
| 0.56         | 0.25               | 0.31       | 0.35   | 0.25   | 0.27   | 0.11       | 0.07       | 0.16       | 0.15       | 0.17       | 0.08       |
| 0.61         | -0.07              | 0.07       | 0.03   | -0.01  | -0.06  | -0.04      | -0.05      | -0.03      | 0.00       | -0.08      | -0.07      |
| 0.66         | 0.19               | 0.17       | 0.25   | 0.19   | 0.19   | 0.11       | 0.06       | 0.17       | 0.05       | 0.03       | 0.09       |
| 0.71         | 0.17               | 0.24       | 0.26   | 0.18   | 0.15   | 0.12       | 0.05       | 0.08       | 0.09       | 0.13       | 0.03       |
| 0.76         | 0.17               | 0.12       | 0.13   | 0.10   | 0.23   | 0.15       | 0.10       | 0.10       | 0.12       | 0.14       | 0.06       |
| 0.81         | 0.37               | 0.31       | 0.25   | 0.27   | 0.23   | 0.12       | 0.13       | 0.21       | 0.11       | 0.13       | 0.08       |
| 0.86         | -0.07              | -0.17      | -0.07  | -0.08  | -0.08  | -0.05      | -0.17      | -0.16      | -0.04      | -0.08      | -0.05      |
| 0.91         | 0.43               | 0.37       | 0.36   | 0.36   | 0.24   | 0.22       | 0.22       | 0.16       | 0.19       | 0.15       | 0.06       |
| 0.96         | 0.32               | 0.28       | 0.29   | 0.31   | 0.26   | 0.19       | 0.18       | 0.14       | 0.26       | 0.09       | 0.05       |
| 1.01         | 0.18               | 0.25       | 0.21   | 0.21   | 0.11   | 0.12       | 0.06       | 0.12       | 0.08       | 0.07       | 0.07       |
| 1.06         | 0.10               | 0.26       | 0.20   | 0.15   | 0.28   | 0.11       | 0.13       | 0.19       | 0.12       | 0.04       | 0.11       |
| 1.11         | -0.19              | -0.15      | -0.06  | -0.14  | 0.01   | -0.05      | -0.14      | -0.16      | 0.00       | 0.00       | -0.12      |
| 1.16         | 0.39               | 0.50       | 0.55   | 0.41   | 0.22   | 0.19       | 0.25       | 0.11       | 0.06       | -0.05      | -0.02      |
| 1.21         | 4.61               | 1.64       | -1.27  | -3.37  | -4.26  | -4.06      | -3.15      | -1.80      | -0.21      | 0.83       | 1.33       |
| 1.26         | 52.69              | 28.33      | 5.26   | -15.46 | -33.07 | -48.00     | -59.43     | -67.28     | -71.50     | -73.39     | -72.24     |
| 1.31         | 335.8<br>8         | 342.5<br>9 | 340.55 | 329.13 | 317.61 | 301.6<br>0 | 281.5<br>1 | 260.4<br>2 | 241.6<br>5 | 224.0<br>9 | 208.3<br>3 |
| 1.36         | -82.53             | -94.75     | -      | -      | -      | -96.59     | -86.31     | -72.51     | -55.07     | -35.09     | -11.46     |
| 1.41         | 18.83              | 20.12      | 20.69  | 20.61  | 19.90  | 18.89      | 17.60      | 16.39      | 15.19      | 13.93      | 13.15      |
| 1.46         | 7.65               | 8.09       | 8.96   | 9.65   | 10.22  | 10.58      | 10.71      | 10.54      | 10.08      | 9.42       | 9.09       |
| 1.51         | 8.93               | 8.17       | 7.37   | 6.84   | 6.51   | 6.50       | 7.02       | 7.80       | 8.79       | 9.83       | 10.90      |
| 1.56         | 9.54               | 10.37      | 10.95  | 10.89  | 10.77  | 10.41      | 10.09      | 9.81       | 9.60       | 9.60       | 9.85       |
| 1.61         | 6.21               | 6.92       | 7.92   | 8.92   | 9.84   | 10.60      | 11.09      | 11.37      | 11.23      | 11.02      | 10.69      |
| 1.66         | 9.59               | 9.02       | 8.47   | 7.86   | 7.61   | 7.49       | 7.71       | 8.09       | 8.62       | 9.18       | 9.87       |
| 1.71         | 6.73               | 7.53       | 8.37   | 9.07   | 9.49   | 9.64       | 9.61       | 9.41       | 9.21       | 8.94       | 8.65       |
| 1.76         | 6.46               | 6.22       | 6.32   | 6.73   | 7.28   | 8.04       | 8.77       | 9.76       | 10.42      | 10.99      | 11.30      |
| 1.81         | 8.39               | 8.59       | 8.47   | 8.22   | 7.92   | 7.59       | 7.45       | 7.52       | 7.79       | 8.11       | 8.48       |
| 1.86         | 7.10               | 7.85       | 8.43   | 9.03   | 9.40   | 9.61       | 9.49       | 9.36       | 9.21       | 8.91       | 8.80       |
| 1.91         | 6.83               | 6.30       | 6.12   | 6.07   | 6.25   | 6.57       | 7.07       | 7.74       | 8.33       | 8.93       | 9.42       |
| 1.96         | 7.64               | 8.14       | 8.40   | 8.47   | 8.36   | 8.20       | 8.04       | 8.00       | 7.97       | 8.05       | 8.36       |
| 2.01         | 5.27               | 5.83       | 6.55   | 7.45   | 8.36   | 9.00       | 9.70       | 10.10      | 10.22      | 10.24      | 10.14      |

|      |      |      |      |      |      |      |      |      |      |      |      |
|------|------|------|------|------|------|------|------|------|------|------|------|
| 2.06 | 8.13 | 8.01 | 7.72 | 7.43 | 7.24 | 7.13 | 7.23 | 7.45 | 7.93 | 8.19 | 8.67 |
| 2.11 | 6.87 | 7.51 | 7.89 | 8.18 | 8.27 | 8.39 | 8.26 | 8.25 | 8.18 | 8.17 | 8.30 |
| 2.16 | 5.92 | 5.93 | 6.23 | 6.68 | 7.25 | 7.82 | 8.40 | 9.02 | 9.49 | 9.72 | 9.94 |
| 2.21 | 8.15 | 8.27 | 8.18 | 8.09 | 7.96 | 7.74 | 7.75 | 7.83 | 8.14 | 8.47 | 8.86 |
| 2.26 | 6.44 | 6.99 | 7.67 | 8.28 | 8.73 | 9.06 | 9.20 | 9.41 | 9.32 | 9.27 | 9.06 |
| 2.31 | 6.75 | 6.69 | 6.62 | 6.61 | 6.75 | 7.00 | 7.42 | 7.87 | 8.33 | 8.74 | 9.26 |
| 2.36 | 7.07 | 7.27 | 7.39 | 7.39 | 7.52 | 7.57 | 7.70 | 7.86 | 8.00 | 8.34 | 8.49 |
| 2.41 | 6.06 | 6.49 | 7.09 | 7.65 | 8.21 | 8.64 | 8.85 | 8.99 | 9.11 | 9.11 | 9.07 |
| 2.46 | 6.99 | 6.84 | 6.79 | 6.75 | 6.72 | 6.77 | 7.06 | 7.33 | 7.74 | 8.14 | 8.54 |
| 2.51 | 6.67 | 7.24 | 7.98 | 8.39 | 8.75 | 8.90 | 8.87 | 8.87 | 8.77 | 8.70 | 8.76 |
| 2.56 | 6.50 | 6.65 | 6.96 | 7.31 | 7.69 | 8.06 | 8.60 | 9.02 | 9.27 | 9.45 | 9.61 |
| 2.61 | 7.08 | 7.05 | 6.97 | 7.04 | 7.18 | 7.18 | 7.41 | 7.74 | 8.03 | 8.46 | 8.70 |
| 2.66 | 6.84 | 7.35 | 7.78 | 8.18 | 8.43 | 8.58 | 8.68 | 8.73 | 8.78 | 8.76 | 8.84 |
| 2.71 | 6.32 | 6.45 | 6.66 | 6.78 | 7.18 | 7.58 | 7.93 | 8.36 | 8.82 | 9.08 | 9.32 |
| 2.76 | 7.39 | 7.70 | 7.88 | 7.99 | 8.06 | 8.03 | 8.01 | 8.24 | 8.32 | 8.60 | 8.83 |
| 2.81 | 6.14 | 6.49 | 7.01 | 7.44 | 7.84 | 8.16 | 8.38 | 8.57 | 8.74 | 8.72 | 8.81 |
| 2.86 | 6.18 | 6.18 | 6.32 | 6.44 | 6.76 | 7.07 | 7.38 | 7.77 | 8.16 | 8.44 | 8.76 |
| 2.91 | 6.90 | 7.29 | 7.63 | 7.81 | 7.99 | 8.17 | 8.17 | 8.25 | 8.38 | 8.40 | 8.67 |
| 2.96 | 6.17 | 6.43 | 6.88 | 7.23 | 7.66 | 8.04 | 8.42 | 8.83 | 8.97 | 9.14 | 9.24 |
| 3.01 | 7.15 | 7.29 | 7.53 | 7.48 | 7.56 | 7.71 | 7.79 | 8.00 | 8.22 | 8.62 | 8.82 |
| 3.06 | 6.07 | 6.49 | 6.98 | 7.27 | 7.66 | 7.83 | 8.01 | 8.33 | 8.30 | 8.44 | 8.49 |
| 3.11 | 6.20 | 6.38 | 6.61 | 6.99 | 7.20 | 7.58 | 7.97 | 8.38 | 8.66 | 8.89 | 9.11 |
| 3.16 | 6.96 | 7.25 | 7.42 | 7.47 | 7.61 | 7.71 | 7.82 | 7.96 | 8.19 | 8.41 | 8.66 |
| 3.21 | 6.59 | 6.87 | 7.29 | 7.50 | 7.84 | 8.06 | 8.29 | 8.43 | 8.60 | 8.70 | 8.83 |
| 3.26 | 6.63 | 6.81 | 6.90 | 7.18 | 7.38 | 7.57 | 7.86 | 8.16 | 8.50 | 8.74 | 8.94 |
| 3.31 | 6.99 | 7.25 | 7.51 | 7.68 | 7.93 | 8.03 | 8.07 | 8.19 | 8.35 | 8.58 | 8.77 |
| 3.36 | 6.55 | 6.78 | 7.18 | 7.52 | 7.86 | 8.22 | 8.45 | 8.75 | 8.91 | 9.22 | 9.26 |
| 3.41 | 6.87 | 6.98 | 7.15 | 7.35 | 7.47 | 7.61 | 7.89 | 8.25 | 8.52 | 8.78 | 9.03 |
| 3.46 | 6.77 | 7.18 | 7.51 | 7.71 | 7.93 | 8.05 | 8.26 | 8.40 | 8.58 | 8.66 | 8.87 |
| 3.51 | 6.61 | 6.75 | 6.97 | 7.25 | 7.60 | 7.84 | 8.15 | 8.51 | 8.75 | 9.06 | 9.24 |
| 3.56 | 6.86 | 7.01 | 7.23 | 7.32 | 7.47 | 7.61 | 7.65 | 7.96 | 8.26 | 8.44 | 8.71 |
| 3.61 | 6.26 | 6.60 | 6.84 | 7.13 | 7.36 | 7.65 | 7.79 | 8.03 | 8.21 | 8.44 | 8.56 |
| 3.66 | 6.28 | 6.44 | 6.63 | 6.83 | 7.04 | 7.35 | 7.69 | 8.01 | 8.29 | 8.52 | 8.73 |
| 3.71 | 6.92 | 7.20 | 7.41 | 7.70 | 7.91 | 8.03 | 8.19 | 8.37 | 8.60 | 8.74 | 8.89 |
| 3.76 | 6.87 | 7.15 | 7.50 | 7.80 | 8.05 | 8.32 | 8.56 | 8.84 | 9.07 | 9.22 | 9.41 |
| 3.81 | 6.29 | 6.52 | 6.63 | 6.92 | 7.12 | 7.32 | 7.63 | 7.92 | 8.19 | 8.42 | 8.68 |
| 3.86 | 6.15 | 6.46 | 6.78 | 7.01 | 7.37 | 7.56 | 7.68 | 7.83 | 8.10 | 8.26 | 8.44 |
| 3.91 | 6.50 | 6.80 | 7.05 | 7.32 | 7.60 | 7.98 | 8.21 | 8.48 | 8.82 | 9.07 | 9.17 |
| 3.96 | 6.63 | 6.90 | 7.10 | 7.31 | 7.51 | 7.67 | 7.88 | 8.11 | 8.32 | 8.70 | 8.91 |
| 4.01 | 6.79 | 7.17 | 7.57 | 7.81 | 8.12 | 8.31 | 8.58 | 8.75 | 8.89 | 9.09 | 9.19 |
| 4.06 | 6.68 | 6.92 | 7.21 | 7.40 | 7.67 | 7.90 | 8.21 | 8.51 | 8.69 | 9.03 | 9.34 |
| 4.11 | 6.60 | 6.76 | 7.10 | 7.26 | 7.47 | 7.57 | 7.82 | 8.17 | 8.34 | 8.59 | 8.82 |
| 4.16 | 6.70 | 7.00 | 7.26 | 7.67 | 7.86 | 8.10 | 8.38 | 8.72 | 8.82 | 9.08 | 9.24 |
| 4.21 | 6.96 | 7.10 | 7.31 | 7.49 | 7.80 | 8.06 | 8.29 | 8.58 | 8.85 | 9.17 | 9.44 |
| 4.26 | 6.80 | 7.07 | 7.31 | 7.58 | 7.82 | 8.05 | 8.18 | 8.47 | 8.57 | 8.80 | 8.96 |
| 4.31 | 6.20 | 6.36 | 6.79 | 6.95 | 7.32 | 7.59 | 7.89 | 8.26 | 8.43 | 8.67 | 8.93 |
| 4.36 | 6.45 | 6.71 | 6.90 | 7.02 | 7.40 | 7.55 | 7.86 | 8.17 | 8.40 | 8.66 | 8.89 |
| 4.41 | 6.37 | 6.76 | 7.07 | 7.20 | 7.61 | 7.79 | 7.95 | 8.20 | 8.44 | 8.58 | 8.72 |
| 4.46 | 6.77 | 7.04 | 7.24 | 7.55 | 7.90 | 8.16 | 8.39 | 8.72 | 8.98 | 9.24 | 9.47 |
| 4.51 | 6.60 | 6.99 | 7.15 | 7.41 | 7.64 | 7.89 | 8.06 | 8.30 | 8.60 | 8.79 | 9.01 |

|       |      |      |      |      |      |      |      |      |      |      |      |
|-------|------|------|------|------|------|------|------|------|------|------|------|
| 4.56  | 6.25 | 6.58 | 6.93 | 7.25 | 7.45 | 7.69 | 7.92 | 8.17 | 8.38 | 8.63 | 8.80 |
| 4.61  | 5.96 | 6.20 | 6.51 | 6.76 | 7.06 | 7.29 | 7.58 | 7.88 | 8.14 | 8.43 | 8.70 |
| 4.66  | 6.74 | 7.03 | 7.29 | 7.47 | 7.79 | 7.99 | 8.07 | 8.40 | 8.64 | 8.75 | 9.00 |
| 4.71  | 6.66 | 6.92 | 7.17 | 7.43 | 7.72 | 8.08 | 8.33 | 8.58 | 8.78 | 8.99 | 9.20 |
| 4.76  | 6.94 | 7.15 | 7.48 | 7.67 | 7.91 | 8.15 | 8.36 | 8.68 | 8.98 | 9.19 | 9.48 |
| 4.81  | 6.35 | 6.72 | 7.00 | 7.27 | 7.55 | 7.72 | 8.03 | 8.26 | 8.45 | 8.67 | 8.85 |
| 4.86  | 6.08 | 6.38 | 6.61 | 6.79 | 7.26 | 7.53 | 7.77 | 8.03 | 8.35 | 8.63 | 8.86 |
| 4.91  | 7.02 | 7.21 | 7.48 | 7.71 | 7.90 | 8.09 | 8.31 | 8.68 | 8.87 | 9.06 | 9.37 |
| 4.96  | 6.39 | 6.67 | 7.02 | 7.22 | 7.63 | 7.83 | 8.02 | 8.36 | 8.60 | 8.78 | 9.13 |
| 5.01  | 6.58 | 6.91 | 7.21 | 7.36 | 7.71 | 7.84 | 8.18 | 8.50 | 8.68 | 8.95 | 9.18 |
| 5.06  | 6.31 | 6.61 | 6.93 | 7.07 | 7.49 | 7.60 | 7.81 | 8.26 | 8.47 | 8.72 | 8.93 |
| 5.11  | 6.42 | 6.72 | 6.91 | 7.22 | 7.45 | 7.80 | 8.00 | 8.32 | 8.54 | 8.64 | 8.87 |
| 5.16  | 6.33 | 6.59 | 6.84 | 7.03 | 7.24 | 7.58 | 7.88 | 8.06 | 8.43 | 8.67 | 8.87 |
| 5.21  | 6.20 | 6.57 | 6.84 | 7.10 | 7.40 | 7.63 | 7.85 | 8.21 | 8.44 | 8.68 | 8.87 |
| 5.26  | 6.66 | 6.98 | 7.25 | 7.50 | 7.77 | 8.01 | 8.30 | 8.63 | 8.89 | 9.13 | 9.29 |
| 5.31  | 6.49 | 6.73 | 6.97 | 7.23 | 7.54 | 7.78 | 7.99 | 8.32 | 8.52 | 8.79 | 9.01 |
| 5.38  | 6.38 | 6.62 | 6.87 | 7.11 | 7.45 | 7.61 | 7.99 | 8.23 | 8.42 | 8.69 | 9.03 |
| 5.45  | 6.78 | 7.06 | 7.38 | 7.55 | 7.76 | 8.00 | 8.29 | 8.57 | 8.85 | 9.09 | 9.39 |
| 5.53  | 6.35 | 6.55 | 6.82 | 7.12 | 7.36 | 7.66 | 7.91 | 8.20 | 8.55 | 8.75 | 9.00 |
| 5.61  | 6.67 | 6.93 | 7.21 | 7.56 | 7.93 | 8.17 | 8.38 | 8.67 | 8.97 | 9.17 | 9.32 |
| 5.70  | 6.47 | 6.70 | 6.96 | 7.18 | 7.50 | 7.68 | 7.95 | 8.35 | 8.60 | 8.88 | 9.14 |
| 5.80  | 6.50 | 6.74 | 7.12 | 7.34 | 7.69 | 7.95 | 8.21 | 8.59 | 8.86 | 9.12 | 9.26 |
| 5.90  | 6.52 | 6.76 | 7.10 | 7.28 | 7.56 | 7.86 | 8.05 | 8.31 | 8.54 | 8.72 | 8.98 |
| 6.01  | 6.81 | 7.06 | 7.44 | 7.68 | 7.95 | 8.14 | 8.53 | 8.81 | 9.05 | 9.22 | 9.52 |
| 6.13  | 6.66 | 6.97 | 7.22 | 7.40 | 7.84 | 8.03 | 8.38 | 8.58 | 8.78 | 9.01 | 9.27 |
| 6.25  | 6.46 | 6.76 | 7.07 | 7.22 | 7.46 | 7.68 | 7.91 | 8.29 | 8.48 | 8.66 | 8.88 |
| 6.39  | 6.78 | 7.05 | 7.27 | 7.47 | 7.78 | 7.99 | 8.23 | 8.43 | 8.68 | 8.90 | 9.11 |
| 6.53  | 6.70 | 6.99 | 7.26 | 7.48 | 7.74 | 8.03 | 8.22 | 8.48 | 8.68 | 8.87 | 9.12 |
| 6.69  | 6.99 | 7.28 | 7.51 | 7.72 | 7.95 | 8.29 | 8.52 | 8.81 | 8.97 | 9.23 | 9.41 |
| 6.85  | 6.75 | 6.85 | 7.18 | 7.44 | 7.65 | 7.97 | 8.06 | 8.41 | 8.61 | 8.92 | 9.08 |
| 7.03  | 6.74 | 6.93 | 7.23 | 7.41 | 7.74 | 7.96 | 8.25 | 8.55 | 8.80 | 8.93 | 9.22 |
| 7.21  | 6.95 | 7.20 | 7.51 | 7.65 | 7.88 | 8.18 | 8.33 | 8.58 | 8.83 | 9.07 | 9.29 |
| 7.41  | 6.92 | 7.17 | 7.48 | 7.70 | 7.97 | 8.20 | 8.42 | 8.73 | 8.94 | 9.15 | 9.38 |
| 7.63  | 7.02 | 7.26 | 7.60 | 7.86 | 8.22 | 8.38 | 8.69 | 9.02 | 9.33 | 9.44 | 9.74 |
| 7.86  | 6.82 | 7.18 | 7.36 | 7.57 | 7.97 | 8.16 | 8.39 | 8.66 | 8.95 | 9.11 | 9.25 |
| 8.10  | 6.66 | 6.86 | 7.22 | 7.51 | 7.75 | 8.03 | 8.18 | 8.46 | 8.73 | 8.97 | 9.13 |
| 8.36  | 6.55 | 6.74 | 7.01 | 7.22 | 7.49 | 7.74 | 7.96 | 8.23 | 8.50 | 8.73 | 8.92 |
| 8.64  | 6.97 | 7.25 | 7.48 | 7.75 | 7.94 | 8.23 | 8.42 | 8.68 | 8.88 | 9.10 | 9.34 |
| 8.94  | 7.19 | 7.40 | 7.68 | 7.91 | 8.18 | 8.46 | 8.70 | 9.01 | 9.20 | 9.48 | 9.74 |
| 9.26  | 7.48 | 7.71 | 8.05 | 8.17 | 8.52 | 8.76 | 8.98 | 9.24 | 9.43 | 9.70 | 9.94 |
| 9.60  | 6.97 | 7.30 | 7.47 | 7.67 | 8.02 | 8.22 | 8.45 | 8.72 | 8.98 | 9.16 | 9.34 |
| 9.97  | 6.85 | 7.14 | 7.39 | 7.65 | 7.94 | 8.07 | 8.44 | 8.63 | 8.98 | 9.18 | 9.42 |
| 10.36 | 7.19 | 7.45 | 7.71 | 7.96 | 8.19 | 8.55 | 8.77 | 8.98 | 9.25 | 9.43 | 9.65 |
| 10.77 | 7.19 | 7.41 | 7.61 | 7.88 | 8.21 | 8.48 | 8.76 | 8.95 | 9.36 | 9.45 | 9.62 |
| 11.22 | 7.06 | 7.31 | 7.55 | 7.75 | 8.00 | 8.34 | 8.59 | 8.84 | 9.06 | 9.29 | 9.48 |
| 11.70 | 7.25 | 7.48 | 7.75 | 8.01 | 8.27 | 8.56 | 8.74 | 8.95 | 9.24 | 9.43 | 9.67 |
| 12.21 | 6.69 | 7.00 | 7.21 | 7.43 | 7.76 | 7.99 | 8.26 | 8.48 | 8.85 | 9.00 | 9.28 |
| 12.75 | 7.03 | 7.35 | 7.59 | 7.83 | 8.21 | 8.38 | 8.49 | 8.85 | 9.19 | 9.34 | 9.51 |
| 13.33 | 7.26 | 7.45 | 7.77 | 8.02 | 8.33 | 8.58 | 8.82 | 9.09 | 9.41 | 9.63 | 9.84 |
| 13.95 | 7.04 | 7.36 | 7.66 | 7.89 | 8.17 | 8.36 | 8.61 | 8.96 | 9.12 | 9.39 | 9.58 |

|        |      |      |      |      |      |      |      |      |      |      |       |
|--------|------|------|------|------|------|------|------|------|------|------|-------|
| 14.62  | 6.80 | 7.09 | 7.29 | 7.57 | 7.87 | 8.07 | 8.30 | 8.57 | 8.87 | 9.14 | 9.45  |
| 15.33  | 6.78 | 7.02 | 7.29 | 7.63 | 7.76 | 8.03 | 8.35 | 8.63 | 8.81 | 9.07 | 9.28  |
| 16.09  | 6.75 | 6.99 | 7.31 | 7.48 | 7.88 | 8.16 | 8.27 | 8.48 | 8.90 | 9.07 | 9.34  |
| 16.90  | 6.74 | 7.05 | 7.36 | 7.72 | 7.92 | 8.31 | 8.47 | 8.83 | 9.08 | 9.34 | 9.56  |
| 17.77  | 6.90 | 7.20 | 7.50 | 7.78 | 8.09 | 8.23 | 8.53 | 8.83 | 9.09 | 9.28 | 9.58  |
| 18.70  | 6.91 | 7.06 | 7.35 | 7.61 | 7.90 | 8.14 | 8.45 | 8.70 | 8.97 | 9.09 | 9.35  |
| 19.69  | 6.76 | 7.11 | 7.31 | 7.53 | 7.85 | 8.12 | 8.33 | 8.62 | 9.01 | 9.27 | 9.52  |
| 20.75  | 6.64 | 6.86 | 7.18 | 7.45 | 7.79 | 8.01 | 8.24 | 8.54 | 8.88 | 9.04 | 9.26  |
| 21.89  | 7.14 | 7.48 | 7.73 | 8.08 | 8.30 | 8.55 | 8.81 | 9.05 | 9.35 | 9.53 | 9.85  |
| 23.10  | 7.31 | 7.61 | 7.88 | 8.12 | 8.42 | 8.65 | 8.95 | 9.27 | 9.53 | 9.70 | 10.07 |
| 24.39  | 6.89 | 7.17 | 7.48 | 7.68 | 8.04 | 8.22 | 8.44 | 8.81 | 9.07 | 9.32 | 9.58  |
| 25.78  | 6.99 | 7.23 | 7.56 | 7.71 | 8.08 | 8.30 | 8.59 | 8.88 | 9.17 | 9.43 | 9.73  |
| 27.26  | 6.97 | 7.24 | 7.49 | 7.73 | 8.11 | 8.37 | 8.58 | 8.86 | 9.15 | 9.45 | 9.69  |
| 28.84  | 6.92 | 7.17 | 7.43 | 7.71 | 8.01 | 8.27 | 8.54 | 8.89 | 9.16 | 9.39 | 9.68  |
| 30.53  | 6.91 | 7.21 | 7.59 | 7.78 | 7.95 | 8.38 | 8.64 | 8.91 | 9.24 | 9.49 | 9.80  |
| 32.34  | 6.46 | 6.73 | 6.95 | 7.15 | 7.56 | 7.80 | 8.08 | 8.54 | 8.75 | 9.06 | 9.35  |
| 34.27  | 6.78 | 7.04 | 7.28 | 7.47 | 7.79 | 8.11 | 8.45 | 8.67 | 9.08 | 9.45 | 9.59  |
| 36.34  | 6.62 | 6.80 | 7.10 | 7.27 | 7.64 | 7.96 | 8.24 | 8.51 | 8.89 | 9.16 | 9.41  |
| 38.55  | 6.63 | 7.00 | 7.23 | 7.50 | 7.72 | 8.05 | 8.34 | 8.71 | 9.07 | 9.31 | 9.63  |
| 40.91  | 6.79 | 7.02 | 7.28 | 7.48 | 7.90 | 8.11 | 8.37 | 8.64 | 9.08 | 9.26 | 9.61  |
| 43.43  | 6.39 | 6.63 | 6.87 | 7.07 | 7.41 | 7.67 | 7.99 | 8.37 | 8.69 | 9.00 | 9.22  |
| 46.13  | 6.56 | 6.83 | 7.11 | 7.25 | 7.66 | 7.82 | 8.16 | 8.54 | 8.78 | 9.08 | 9.32  |
| 49.01  | 6.59 | 6.90 | 7.19 | 7.44 | 7.70 | 7.92 | 8.29 | 8.65 | 9.04 | 9.32 | 9.53  |
| 52.09  | 6.38 | 6.61 | 6.84 | 7.11 | 7.39 | 7.70 | 8.07 | 8.36 | 8.80 | 9.10 | 9.38  |
| 55.39  | 6.29 | 6.49 | 6.75 | 6.99 | 7.27 | 7.57 | 7.99 | 8.27 | 8.65 | 8.92 | 9.21  |
| 58.91  | 6.22 | 6.47 | 6.79 | 6.93 | 7.29 | 7.61 | 7.90 | 8.29 | 8.59 | 8.93 | 9.19  |
| 62.68  | 6.09 | 6.34 | 6.57 | 6.80 | 7.16 | 7.51 | 7.79 | 8.21 | 8.52 | 8.83 | 9.31  |
| 66.70  | 6.15 | 6.44 | 6.66 | 6.89 | 7.22 | 7.48 | 7.86 | 8.25 | 8.59 | 8.91 | 9.19  |
| 71.00  | 5.98 | 6.27 | 6.64 | 6.83 | 7.24 | 7.62 | 7.90 | 8.27 | 8.63 | 9.05 | 9.28  |
| 75.60  | 6.09 | 6.26 | 6.51 | 6.74 | 7.03 | 7.42 | 7.71 | 8.10 | 8.46 | 8.81 | 9.05  |
| 80.51  | 5.98 | 6.26 | 6.43 | 6.76 | 7.07 | 7.38 | 7.78 | 8.23 | 8.61 | 8.85 | 9.10  |
| 85.77  | 5.80 | 6.09 | 6.34 | 6.69 | 6.98 | 7.40 | 7.73 | 8.13 | 8.57 | 8.85 | 9.25  |
| 91.38  | 6.24 | 6.44 | 6.83 | 7.03 | 7.31 | 7.67 | 8.00 | 8.39 | 8.79 | 9.06 | 9.39  |
| 97.39  | 5.50 | 5.84 | 6.04 | 6.22 | 6.65 | 6.99 | 7.38 | 7.82 | 8.19 | 8.60 | 8.98  |
| 103.80 | 6.16 | 6.39 | 6.60 | 6.87 | 7.19 | 7.55 | 7.93 | 8.27 | 8.70 | 9.03 | 9.48  |
| 110.66 | 5.88 | 6.10 | 6.41 | 6.58 | 6.87 | 7.24 | 7.58 | 8.03 | 8.48 | 8.71 | 8.99  |
| 117.99 | 5.46 | 5.68 | 6.02 | 6.26 | 6.58 | 6.92 | 7.37 | 7.80 | 8.23 | 8.57 | 8.91  |
| 125.83 | 6.11 | 6.33 | 6.53 | 6.73 | 7.05 | 7.42 | 7.80 | 8.20 | 8.61 | 8.86 | 9.17  |
| 134.21 | 5.68 | 5.85 | 6.13 | 6.26 | 6.63 | 6.98 | 7.38 | 7.84 | 8.22 | 8.61 | 9.00  |
| 143.17 | 5.41 | 5.57 | 5.89 | 6.17 | 6.52 | 6.80 | 7.22 | 7.66 | 8.13 | 8.60 | 8.91  |
| 152.74 | 5.99 | 6.34 | 6.56 | 6.71 | 7.00 | 7.37 | 7.78 | 8.04 | 8.59 | 8.84 | 9.20  |
| 162.97 | 6.79 | 7.02 | 7.32 | 7.58 | 7.98 | 8.25 | 8.50 | 8.85 | 9.15 | 9.38 | 9.67  |
| 173.91 | 6.52 | 6.89 | 7.16 | 7.43 | 7.78 | 8.01 | 8.30 | 8.69 | 8.97 | 9.35 | 9.52  |
| 185.60 | 6.74 | 6.99 | 7.33 | 7.60 | 7.95 | 8.26 | 8.53 | 8.88 | 9.13 | 9.44 | 9.75  |
| 198.10 | 6.52 | 6.79 | 7.12 | 7.42 | 7.70 | 7.99 | 8.27 | 8.66 | 9.01 | 9.22 | 9.48  |
| 211.46 | 6.86 | 7.08 | 7.41 | 7.65 | 7.96 | 8.24 | 8.55 | 8.83 | 9.13 | 9.43 | 9.63  |
| 225.75 | 6.66 | 6.91 | 7.21 | 7.54 | 7.82 | 8.15 | 8.43 | 8.76 | 9.09 | 9.43 | 9.72  |
| 241.01 | 6.40 | 6.75 | 7.00 | 7.35 | 7.62 | 7.86 | 8.32 | 8.58 | 8.85 | 9.14 | 9.44  |
| 257.33 | 6.43 | 6.63 | 7.03 | 7.32 | 7.56 | 7.96 | 8.25 | 8.54 | 8.87 | 9.14 | 9.49  |
| 274.77 | 6.84 | 7.06 | 7.48 | 7.72 | 7.96 | 8.25 | 8.46 | 8.86 | 9.18 | 9.48 | 9.77  |

|         |      |      |      |      |      |      |      |      |      |      |      |
|---------|------|------|------|------|------|------|------|------|------|------|------|
| 293.42  | 6.68 | 6.92 | 7.28 | 7.58 | 7.89 | 8.18 | 8.37 | 8.87 | 9.21 | 9.42 | 9.72 |
| 313.35  | 6.60 | 6.89 | 7.15 | 7.44 | 7.75 | 8.14 | 8.40 | 8.73 | 9.06 | 9.37 | 9.55 |
| 334.66  | 6.80 | 7.01 | 7.36 | 7.61 | 7.88 | 8.24 | 8.54 | 8.86 | 9.13 | 9.53 | 9.80 |
| 357.43  | 6.50 | 6.75 | 7.10 | 7.31 | 7.69 | 7.99 | 8.28 | 8.67 | 8.97 | 9.26 | 9.51 |
| 381.78  | 6.60 | 6.93 | 7.19 | 7.49 | 7.84 | 8.08 | 8.31 | 8.60 | 8.94 | 9.15 | 9.51 |
| 407.80  | 6.55 | 6.80 | 7.06 | 7.30 | 7.62 | 7.93 | 8.31 | 8.66 | 9.01 | 9.21 | 9.49 |
| 435.62  | 6.64 | 6.88 | 7.14 | 7.56 | 7.87 | 8.13 | 8.50 | 8.86 | 9.09 | 9.52 | 9.69 |
| 465.35  | 6.53 | 6.78 | 7.06 | 7.39 | 7.78 | 7.95 | 8.31 | 8.68 | 9.01 | 9.27 | 9.49 |
| 497.14  | 6.33 | 6.52 | 6.80 | 7.03 | 7.45 | 7.69 | 7.98 | 8.43 | 8.81 | 9.11 | 9.41 |
| 531.11  | 6.25 | 6.58 | 6.83 | 7.13 | 7.43 | 7.78 | 8.10 | 8.39 | 8.67 | 8.92 | 9.28 |
| 567.43  | 6.55 | 6.83 | 7.10 | 7.40 | 7.75 | 8.04 | 8.31 | 8.67 | 9.06 | 9.38 | 9.52 |
| 606.26  | 6.28 | 6.50 | 6.80 | 7.07 | 7.39 | 7.80 | 8.10 | 8.48 | 8.87 | 9.14 | 9.49 |
| 647.76  | 6.49 | 6.78 | 7.00 | 7.27 | 7.71 | 7.97 | 8.22 | 8.63 | 8.93 | 9.29 | 9.56 |
| 692.12  | 5.96 | 6.28 | 6.55 | 6.82 | 7.21 | 7.53 | 7.79 | 8.19 | 8.56 | 8.79 | 9.14 |
| 739.53  | 6.47 | 6.70 | 7.07 | 7.30 | 7.54 | 7.94 | 8.19 | 8.59 | 8.97 | 9.19 | 9.49 |
| 790.22  | 6.06 | 6.37 | 6.59 | 6.85 | 7.24 | 7.48 | 7.92 | 8.20 | 8.61 | 8.86 | 9.25 |
| 844.40  | 6.19 | 6.44 | 6.70 | 6.94 | 7.37 | 7.68 | 7.92 | 8.30 | 8.73 | 9.01 | 9.38 |
| 902.32  | 6.39 | 6.66 | 6.96 | 7.22 | 7.59 | 7.86 | 8.17 | 8.53 | 8.85 | 9.13 | 9.47 |
| 964.23  | 5.87 | 6.17 | 6.40 | 6.64 | 7.05 | 7.39 | 7.65 | 8.06 | 8.45 | 8.76 | 9.06 |
| 1030.41 | 6.59 | 6.92 | 7.09 | 7.36 | 7.63 | 7.91 | 8.22 | 8.52 | 8.91 | 9.16 | 9.45 |
| 1101.15 | 6.28 | 6.58 | 6.82 | 7.06 | 7.39 | 7.74 | 7.92 | 8.34 | 8.64 | 8.97 | 9.29 |
| 1176.77 | 6.40 | 6.64 | 6.97 | 7.25 | 7.64 | 7.89 | 8.18 | 8.48 | 8.85 | 9.12 | 9.38 |
| 1257.60 | 6.56 | 6.73 | 7.00 | 7.24 | 7.49 | 7.83 | 8.13 | 8.49 | 8.75 | 9.10 | 9.28 |
| 1344.00 | 6.20 | 6.49 | 6.70 | 6.87 | 7.29 | 7.60 | 7.87 | 8.29 | 8.60 | 8.84 | 9.21 |
| 1436.36 | 6.39 | 6.63 | 6.86 | 7.07 | 7.43 | 7.65 | 7.93 | 8.26 | 8.66 | 8.93 | 9.18 |
| 1535.09 | 6.38 | 6.67 | 6.80 | 7.00 | 7.34 | 7.70 | 8.00 | 8.34 | 8.71 | 8.97 | 9.25 |
| 1640.63 | 5.92 | 6.23 | 6.41 | 6.68 | 7.01 | 7.42 | 7.56 | 8.09 | 8.42 | 8.68 | 9.00 |
| 1753.44 | 6.17 | 6.37 | 6.67 | 6.86 | 7.22 | 7.38 | 7.75 | 8.18 | 8.43 | 8.88 | 9.13 |
| 1874.02 | 5.89 | 6.10 | 6.33 | 6.60 | 6.93 | 7.29 | 7.57 | 7.85 | 8.39 | 8.59 | 8.98 |
| 2002.92 | 6.15 | 6.40 | 6.60 | 6.87 | 7.20 | 7.41 | 7.79 | 8.10 | 8.48 | 8.86 | 9.06 |
| 2140.71 | 5.67 | 6.01 | 6.17 | 6.45 | 6.75 | 7.05 | 7.42 | 7.75 | 8.22 | 8.47 | 8.81 |
| 2288.00 | 5.73 | 6.04 | 6.19 | 6.49 | 6.83 | 7.10 | 7.40 | 7.78 | 8.20 | 8.51 | 8.89 |
| 2445.44 | 5.65 | 5.87 | 6.04 | 6.36 | 6.71 | 7.02 | 7.30 | 7.66 | 8.05 | 8.32 | 8.64 |
| 2613.73 | 5.78 | 6.07 | 6.35 | 6.60 | 6.84 | 7.25 | 7.53 | 7.91 | 8.32 | 8.62 | 8.90 |
| 2793.63 | 5.86 | 6.09 | 6.26 | 6.48 | 6.83 | 7.27 | 7.55 | 7.78 | 8.22 | 8.52 | 8.77 |
| 2985.93 | 5.17 | 5.42 | 5.69 | 5.94 | 6.28 | 6.70 | 7.00 | 7.40 | 7.71 | 8.10 | 8.50 |
| 3191.49 | 5.46 | 5.74 | 5.96 | 6.26 | 6.51 | 6.94 | 7.26 | 7.62 | 7.90 | 8.29 | 8.55 |
| 3411.21 | 5.34 | 5.58 | 5.82 | 6.00 | 6.40 | 6.76 | 7.07 | 7.54 | 7.87 | 8.16 | 8.46 |
| 3646.09 | 5.24 | 5.57 | 5.82 | 6.02 | 6.44 | 6.82 | 7.05 | 7.51 | 7.90 | 8.22 | 8.56 |
| 3897.16 | 5.23 | 5.56 | 5.83 | 5.96 | 6.39 | 6.69 | 6.91 | 7.47 | 7.84 | 8.11 | 8.43 |

| Wavelength (nm) | 537.73 | 539.15 | 540.58 | 542.00 | 543.43 | 544.85 | 546.27 | 547.70 | 549.12 | 550.55 | 551.97 |
|-----------------|--------|--------|--------|--------|--------|--------|--------|--------|--------|--------|--------|
| Time (ps)       |        |        |        |        |        |        |        |        |        |        |        |
| -2.74           | 0.00   | 0.00   | -0.02  | 0.05   | -0.01  | -0.03  | -0.02  | -0.03  | -0.01  | 0.05   | 0.06   |
| -2.24           | -0.07  | -0.08  | -0.07  | 0.02   | 0.04   | -0.07  | -0.07  | -0.10  | -0.03  | -0.09  | -0.06  |
| -1.74           | -0.15  | -0.08  | -0.07  | -0.11  | -0.05  | -0.05  | -0.07  | -0.07  | -0.08  | -0.06  | -0.04  |
| -1.24           | 0.08   | -0.04  | 0.05   | -0.06  | -0.09  | -0.06  | -0.04  | 0.00   | 0.04   | 0.01   | -0.01  |
| -0.74           | 0.11   | 0.08   | 0.04   | 0.07   | 0.08   | 0.11   | 0.13   | 0.03   | 0.07   | 0.06   | 0.06   |
| -0.24           | -0.01  | -0.06  | -0.07  | -0.04  | -0.11  | 0.00   | -0.02  | -0.02  | -0.10  | -0.05  | -0.03  |

|       |        |        |        |        |        |        |        |        |        |        |        |
|-------|--------|--------|--------|--------|--------|--------|--------|--------|--------|--------|--------|
| -0.14 | 0.01   | 0.09   | 0.10   | 0.00   | 0.02   | 0.03   | 0.07   | 0.08   | 0.05   | -0.01  | -0.02  |
| -0.04 | 0.03   | 0.08   | 0.04   | 0.06   | 0.12   | 0.08   | 0.02   | 0.11   | 0.06   | 0.08   | 0.03   |
| 0.06  | 0.00   | -0.11  | -0.10  | -0.05  | -0.01  | -0.09  | -0.01  | -0.07  | -0.07  | -0.01  | -0.03  |
| 0.16  | 0.12   | 0.09   | 0.01   | 0.07   | 0.06   | 0.00   | -0.01  | -0.02  | 0.06   | -0.04  | -0.01  |
| 0.26  | 0.05   | -0.02  | 0.01   | 0.01   | 0.01   | -0.06  | -0.04  | -0.06  | -0.10  | -0.05  | -0.11  |
| 0.31  | 0.00   | 0.03   | 0.01   | -0.05  | 0.02   | -0.08  | -0.10  | -0.06  | -0.04  | 0.04   | -0.04  |
| 0.36  | -0.04  | -0.12  | -0.04  | -0.01  | 0.01   | -0.11  | -0.12  | -0.02  | -0.12  | -0.02  | -0.04  |
| 0.41  | -0.02  | -0.07  | -0.09  | -0.10  | -0.01  | -0.05  | -0.11  | -0.06  | -0.03  | 0.03   | -0.07  |
| 0.46  | 0.07   | 0.07   | 0.05   | 0.08   | 0.07   | 0.02   | 0.07   | 0.03   | -0.01  | -0.03  | 0.03   |
| 0.51  | 0.15   | 0.05   | 0.07   | 0.03   | 0.04   | -0.20  | -0.08  | -0.02  | -0.02  | 0.07   | 0.00   |
| 0.56  | 0.03   | -0.01  | 0.05   | 0.02   | 0.07   | -0.04  | 0.06   | -0.05  | -0.01  | 0.03   | 0.10   |
| 0.61  | -0.09  | -0.04  | -0.11  | -0.03  | -0.05  | -0.08  | 0.09   | -0.07  | -0.03  | 0.00   | 0.00   |
| 0.66  | 0.03   | 0.02   | 0.01   | 0.04   | -0.01  | -0.05  | -0.05  | 0.02   | -0.05  | -0.03  | -0.04  |
| 0.71  | 0.04   | 0.03   | -0.04  | 0.03   | 0.03   | -0.04  | -0.05  | 0.01   | -0.03  | 0.01   | -0.05  |
| 0.76  | 0.04   | -0.02  | -0.05  | -0.04  | 0.03   | -0.03  | -0.10  | -0.06  | -0.13  | -0.08  | -0.04  |
| 0.81  | 0.04   | 0.12   | 0.07   | 0.07   | 0.10   | 0.03   | 0.06   | 0.06   | 0.00   | 0.07   | 0.07   |
| 0.86  | -0.17  | -0.10  | -0.17  | -0.10  | -0.07  | -0.14  | -0.06  | -0.04  | -0.07  | -0.01  | 0.02   |
| 0.91  | 0.10   | 0.05   | 0.03   | 0.02   | 0.12   | 0.00   | -0.01  | -0.06  | -0.07  | 0.03   | 0.04   |
| 0.96  | 0.09   | 0.02   | 0.06   | 0.04   | 0.06   | 0.01   | -0.04  | 0.00   | -0.05  | -0.06  | -0.04  |
| 1.01  | 0.02   | 0.04   | 0.03   | -0.03  | 0.05   | 0.00   | -0.06  | -0.03  | -0.04  | -0.03  | -0.08  |
| 1.06  | 0.06   | 0.08   | 0.08   | 0.03   | 0.05   | -0.05  | 0.01   | 0.01   | -0.06  | 0.01   | -0.01  |
| 1.11  | -0.18  | 0.04   | 0.06   | -0.13  | -0.02  | -0.06  | -0.01  | -0.02  | -0.03  | -0.05  | 0.08   |
| 1.16  | 0.10   | 0.04   | 0.02   | 0.00   | 0.04   | -0.09  | -0.07  | -0.03  | -0.07  | -0.08  | -0.04  |
| 1.21  | 1.15   | 0.51   | -0.13  | -0.55  | -0.67  | -0.73  | -0.67  | -0.53  | -0.27  | 0.05   | 0.15   |
| 1.26  | -69.20 | -64.58 | -58.65 | -51.54 | -43.69 | -35.60 | -27.20 | -19.21 | -11.80 | -5.37  | -0.55  |
| 1.31  | 195.39 | 183.90 | 171.63 | 160.33 | 147.99 | 133.32 | 117.90 | 100.18 | 82.44  | 64.33  | 46.93  |
| 1.36  | 15.18  | 44.69  | 75.42  | 108.57 | 141.81 | 173.54 | 203.57 | 229.00 | 251.01 | 267.40 | 279.21 |
| 1.41  | 12.53  | 11.88  | 10.89  | 9.45   | 6.97   | 3.37   | -1.51  | -7.81  | -15.32 | -23.71 | -32.94 |
| 1.46  | 8.64   | 8.46   | 8.50   | 8.98   | 9.91   | 10.88  | 12.31  | 13.94  | 15.57  | 17.27  | 18.50  |
| 1.51  | 11.75  | 12.63  | 13.41  | 13.89  | 14.35  | 14.45  | 14.49  | 14.49  | 14.40  | 14.46  | 14.31  |
| 1.56  | 10.22  | 10.67  | 11.16  | 11.83  | 12.34  | 12.70  | 12.98  | 13.06  | 13.08  | 12.92  | 12.84  |
| 1.61  | 10.36  | 9.93   | 9.67   | 9.57   | 9.53   | 9.69   | 9.96   | 10.31  | 10.67  | 11.23  | 11.56  |
| 1.66  | 10.40  | 10.80  | 11.08  | 11.20  | 11.49  | 11.48  | 11.53  | 11.58  | 11.66  | 11.72  | 11.84  |
| 1.71  | 8.62   | 8.60   | 8.87   | 9.26   | 9.67   | 10.17  | 10.73  | 11.29  | 11.74  | 12.09  | 12.42  |
| 1.76  | 11.48  | 11.54  | 11.49  | 11.38  | 11.27  | 11.03  | 11.08  | 11.10  | 11.24  | 11.49  | 11.61  |
| 1.81  | 8.96   | 9.53   | 9.97   | 10.43  | 10.72  | 10.95  | 11.12  | 11.10  | 11.06  | 11.06  | 11.08  |
| 1.86  | 8.65   | 8.65   | 8.72   | 9.00   | 9.34   | 9.63   | 10.09  | 10.53  | 10.88  | 11.26  | 11.51  |
| 1.91  | 9.76   | 9.89   | 10.12  | 10.18  | 10.32  | 10.32  | 10.43  | 10.48  | 10.50  | 10.66  | 10.81  |
| 1.96  | 8.79   | 9.15   | 9.62   | 10.09  | 10.66  | 10.86  | 11.19  | 11.36  | 11.57  | 11.52  | 11.50  |
| 2.01  | 9.98   | 9.74   | 9.52   | 9.35   | 9.38   | 9.38   | 9.59   | 9.93   | 10.22  | 10.50  | 10.90  |
| 2.06  | 9.18   | 9.62   | 10.03  | 10.28  | 10.53  | 10.64  | 10.71  | 10.80  | 10.78  | 10.87  | 10.89  |
| 2.11  | 8.41   | 8.75   | 9.03   | 9.41   | 9.85   | 10.18  | 10.60  | 10.86  | 11.16  | 11.30  | 11.47  |
| 2.16  | 10.05  | 9.99   | 10.02  | 9.98   | 9.92   | 10.01  | 10.07  | 10.11  | 10.26  | 10.58  | 10.76  |
| 2.21  | 9.38   | 9.71   | 10.06  | 10.54  | 10.81  | 10.89  | 11.03  | 11.07  | 11.11  | 11.14  | 11.22  |
| 2.26  | 9.02   | 9.02   | 9.05   | 9.28   | 9.49   | 9.93   | 10.29  | 10.58  | 10.97  | 11.25  | 11.47  |
| 2.31  | 9.49   | 9.72   | 10.05  | 10.08  | 10.23  | 10.38  | 10.33  | 10.45  | 10.52  | 10.61  | 10.80  |
| 2.36  | 8.87   | 9.15   | 9.48   | 9.84   | 10.14  | 10.34  | 10.45  | 10.56  | 10.70  | 10.77  | 10.99  |
| 2.41  | 9.06   | 9.03   | 8.98   | 9.22   | 9.30   | 9.53   | 9.78   | 10.06  | 10.39  | 10.60  | 10.88  |
| 2.46  | 8.96   | 9.36   | 9.58   | 9.81   | 10.07  | 10.22  | 10.26  | 10.36  | 10.44  | 10.44  | 10.62  |
| 2.51  | 8.80   | 8.95   | 9.17   | 9.55   | 9.93   | 10.26  | 10.69  | 11.03  | 11.25  | 11.57  | 11.64  |

|      |      |      |       |       |       |       |       |       |       |       |       |
|------|------|------|-------|-------|-------|-------|-------|-------|-------|-------|-------|
| 2.56 | 9.85 | 9.89 | 9.89  | 9.88  | 10.01 | 10.06 | 10.32 | 10.34 | 10.62 | 10.77 | 10.93 |
| 2.61 | 9.09 | 9.36 | 9.62  | 9.76  | 9.97  | 10.12 | 10.31 | 10.27 | 10.45 | 10.53 | 10.61 |
| 2.66 | 8.97 | 9.12 | 9.39  | 9.53  | 9.91  | 10.14 | 10.44 | 10.76 | 10.91 | 11.16 | 11.31 |
| 2.71 | 9.51 | 9.51 | 9.75  | 9.72  | 9.94  | 9.87  | 10.04 | 10.16 | 10.26 | 10.42 | 10.65 |
| 2.76 | 9.09 | 9.48 | 9.71  | 10.02 | 10.34 | 10.52 | 10.78 | 10.92 | 11.01 | 11.13 | 11.23 |
| 2.81 | 8.86 | 8.85 | 9.09  | 9.17  | 9.45  | 9.65  | 9.88  | 10.19 | 10.46 | 10.73 | 10.88 |
| 2.86 | 9.04 | 9.26 | 9.35  | 9.57  | 9.73  | 9.82  | 9.93  | 10.04 | 10.15 | 10.31 | 10.47 |
| 2.91 | 8.84 | 9.12 | 9.34  | 9.69  | 9.98  | 10.19 | 10.48 | 10.67 | 10.76 | 10.95 | 11.08 |
| 2.96 | 9.42 | 9.54 | 9.53  | 9.74  | 9.92  | 10.01 | 10.17 | 10.44 | 10.64 | 10.83 | 11.08 |
| 3.01 | 9.13 | 9.44 | 9.70  | 10.11 | 10.25 | 10.48 | 10.67 | 10.81 | 10.86 | 11.04 | 11.15 |
| 3.06 | 8.64 | 8.83 | 9.01  | 9.24  | 9.51  | 9.78  | 9.98  | 10.18 | 10.41 | 10.57 | 10.71 |
| 3.11 | 9.28 | 9.44 | 9.56  | 9.71  | 9.91  | 9.99  | 10.14 | 10.32 | 10.45 | 10.69 | 10.88 |
| 3.16 | 9.03 | 9.28 | 9.54  | 9.79  | 10.04 | 10.22 | 10.40 | 10.60 | 10.75 | 10.90 | 11.00 |
| 3.21 | 9.07 | 9.12 | 9.45  | 9.58  | 9.79  | 10.01 | 10.26 | 10.46 | 10.67 | 10.73 | 10.94 |
| 3.26 | 9.23 | 9.48 | 9.74  | 9.81  | 10.00 | 10.11 | 10.20 | 10.38 | 10.58 | 10.72 | 10.82 |
| 3.31 | 8.91 | 9.22 | 9.47  | 9.74  | 9.98  | 10.22 | 10.37 | 10.61 | 10.68 | 10.84 | 10.98 |
| 3.36 | 9.42 | 9.51 | 9.72  | 9.80  | 10.10 | 10.22 | 10.37 | 10.57 | 10.84 | 11.00 | 11.22 |
| 3.41 | 9.36 | 9.62 | 9.80  | 10.06 | 10.24 | 10.34 | 10.52 | 10.62 | 10.75 | 10.88 | 11.04 |
| 3.46 | 9.03 | 9.26 | 9.48  | 9.74  | 9.97  | 10.19 | 10.38 | 10.63 | 10.80 | 10.91 | 11.07 |
| 3.51 | 9.33 | 9.58 | 9.77  | 9.93  | 10.10 | 10.23 | 10.37 | 10.51 | 10.73 | 10.94 | 10.97 |
| 3.56 | 9.05 | 9.30 | 9.57  | 9.82  | 10.04 | 10.18 | 10.41 | 10.51 | 10.64 | 10.78 | 10.98 |
| 3.61 | 8.70 | 8.88 | 9.08  | 9.30  | 9.62  | 9.75  | 9.95  | 10.23 | 10.40 | 10.55 | 10.74 |
| 3.66 | 9.08 | 9.20 | 9.41  | 9.56  | 9.71  | 9.81  | 10.06 | 10.17 | 10.25 | 10.42 | 10.57 |
| 3.71 | 9.22 | 9.38 | 9.68  | 9.91  | 10.25 | 10.42 | 10.60 | 10.82 | 10.89 | 11.13 | 11.22 |
| 3.76 | 9.62 | 9.84 | 9.96  | 10.20 | 10.39 | 10.62 | 10.71 | 10.93 | 11.10 | 11.35 | 11.46 |
| 3.81 | 8.96 | 9.17 | 9.41  | 9.52  | 9.76  | 9.95  | 10.05 | 10.16 | 10.32 | 10.55 | 10.64 |
| 3.86 | 8.68 | 8.83 | 9.05  | 9.33  | 9.64  | 9.82  | 9.95  | 10.16 | 10.34 | 10.50 | 10.68 |
| 3.91 | 9.50 | 9.62 | 9.79  | 9.96  | 10.19 | 10.28 | 10.49 | 10.64 | 10.86 | 10.94 | 11.13 |
| 3.96 | 9.15 | 9.50 | 9.74  | 9.90  | 10.17 | 10.29 | 10.44 | 10.65 | 10.79 | 10.91 | 10.99 |
| 4.01 | 9.43 | 9.52 | 9.71  | 9.87  | 10.21 | 10.35 | 10.55 | 10.84 | 10.97 | 11.17 | 11.25 |
| 4.06 | 9.48 | 9.63 | 9.86  | 10.04 | 10.31 | 10.29 | 10.54 | 10.66 | 10.83 | 11.04 | 11.11 |
| 4.11 | 9.11 | 9.28 | 9.49  | 9.80  | 10.10 | 10.26 | 10.41 | 10.55 | 10.72 | 10.88 | 10.96 |
| 4.16 | 9.47 | 9.57 | 9.79  | 9.94  | 10.13 | 10.27 | 10.46 | 10.69 | 10.88 | 11.06 | 11.13 |
| 4.21 | 9.72 | 9.91 | 10.18 | 10.39 | 10.59 | 10.74 | 10.90 | 10.98 | 11.20 | 11.33 | 11.37 |
| 4.26 | 9.17 | 9.39 | 9.66  | 9.87  | 10.08 | 10.32 | 10.50 | 10.65 | 10.83 | 10.88 | 11.14 |
| 4.31 | 9.12 | 9.23 | 9.41  | 9.70  | 9.97  | 9.98  | 10.19 | 10.36 | 10.48 | 10.77 | 10.88 |
| 4.36 | 9.17 | 9.35 | 9.58  | 9.72  | 10.05 | 10.17 | 10.35 | 10.56 | 10.73 | 10.93 | 10.90 |
| 4.41 | 9.03 | 9.15 | 9.38  | 9.63  | 9.86  | 9.97  | 10.11 | 10.36 | 10.58 | 10.72 | 10.91 |
| 4.46 | 9.71 | 9.83 | 10.00 | 10.21 | 10.43 | 10.51 | 10.63 | 10.79 | 10.98 | 11.22 | 11.40 |
| 4.51 | 9.23 | 9.46 | 9.72  | 9.94  | 10.19 | 10.38 | 10.59 | 10.73 | 10.94 | 11.04 | 11.25 |
| 4.56 | 9.08 | 9.25 | 9.42  | 9.63  | 9.84  | 10.04 | 10.28 | 10.47 | 10.61 | 10.85 | 10.95 |
| 4.61 | 8.92 | 9.10 | 9.31  | 9.46  | 9.69  | 9.93  | 10.11 | 10.25 | 10.42 | 10.62 | 10.71 |
| 4.66 | 9.25 | 9.48 | 9.64  | 9.92  | 10.30 | 10.31 | 10.55 | 10.70 | 10.93 | 11.06 | 11.23 |
| 4.71 | 9.39 | 9.56 | 9.74  | 9.87  | 10.16 | 10.29 | 10.42 | 10.62 | 10.87 | 10.94 | 11.17 |
| 4.76 | 9.58 | 9.87 | 10.06 | 10.29 | 10.49 | 10.67 | 10.82 | 10.97 | 11.12 | 11.29 | 11.46 |
| 4.81 | 9.09 | 9.30 | 9.53  | 9.80  | 10.00 | 10.23 | 10.38 | 10.57 | 10.76 | 10.95 | 11.11 |
| 4.86 | 9.10 | 9.25 | 9.44  | 9.63  | 9.80  | 10.01 | 10.17 | 10.37 | 10.52 | 10.70 | 10.93 |
| 4.91 | 9.54 | 9.66 | 9.96  | 10.19 | 10.47 | 10.58 | 10.72 | 10.97 | 11.04 | 11.27 | 11.36 |
| 4.96 | 9.16 | 9.40 | 9.60  | 9.76  | 10.03 | 10.19 | 10.37 | 10.61 | 10.69 | 10.91 | 11.01 |
| 5.01 | 9.37 | 9.52 | 9.72  | 9.93  | 10.19 | 10.29 | 10.45 | 10.66 | 10.81 | 10.95 | 11.06 |



|       |       |       |       |       |       |       |       |       |       |       |       |
|-------|-------|-------|-------|-------|-------|-------|-------|-------|-------|-------|-------|
| 5.06  | 9.15  | 9.38  | 9.65  | 9.91  | 10.08 | 10.36 | 10.52 | 10.66 | 10.81 | 11.04 | 11.24 |
| 5.11  | 9.14  | 9.33  | 9.49  | 9.71  | 9.85  | 10.04 | 10.26 | 10.46 | 10.57 | 10.76 | 11.03 |
| 5.16  | 9.14  | 9.34  | 9.50  | 9.71  | 9.97  | 10.06 | 10.29 | 10.49 | 10.63 | 10.77 | 10.99 |
| 5.21  | 9.09  | 9.32  | 9.50  | 9.72  | 10.01 | 10.26 | 10.33 | 10.60 | 10.72 | 10.95 | 11.07 |
| 5.26  | 9.49  | 9.76  | 9.95  | 10.12 | 10.36 | 10.45 | 10.73 | 10.87 | 11.09 | 11.16 | 11.34 |
| 5.31  | 9.26  | 9.60  | 9.76  | 9.94  | 10.27 | 10.41 | 10.53 | 10.73 | 10.85 | 11.04 | 11.14 |
| 5.38  | 9.19  | 9.45  | 9.57  | 9.91  | 10.14 | 10.29 | 10.41 | 10.64 | 10.77 | 11.00 | 11.04 |
| 5.45  | 9.59  | 9.83  | 9.95  | 10.23 | 10.44 | 10.69 | 10.82 | 11.07 | 11.07 | 11.27 | 11.42 |
| 5.53  | 9.27  | 9.49  | 9.72  | 9.96  | 10.22 | 10.32 | 10.56 | 10.73 | 10.95 | 11.03 | 11.12 |
| 5.61  | 9.51  | 9.80  | 10.00 | 10.20 | 10.51 | 10.62 | 10.79 | 10.99 | 11.22 | 11.28 | 11.46 |
| 5.70  | 9.36  | 9.53  | 9.83  | 10.04 | 10.33 | 10.47 | 10.69 | 10.84 | 11.00 | 11.17 | 11.37 |
| 5.80  | 9.46  | 9.74  | 9.92  | 10.11 | 10.38 | 10.57 | 10.74 | 10.98 | 11.18 | 11.31 | 11.48 |
| 5.90  | 9.20  | 9.37  | 9.64  | 9.76  | 10.06 | 10.15 | 10.30 | 10.56 | 10.68 | 10.87 | 10.89 |
| 6.01  | 9.69  | 9.95  | 10.17 | 10.36 | 10.57 | 10.72 | 10.92 | 11.15 | 11.33 | 11.49 | 11.65 |
| 6.13  | 9.54  | 9.73  | 9.93  | 10.05 | 10.29 | 10.50 | 10.67 | 10.79 | 10.96 | 11.12 | 11.31 |
| 6.25  | 9.14  | 9.31  | 9.54  | 9.73  | 10.09 | 10.21 | 10.38 | 10.49 | 10.68 | 10.87 | 10.98 |
| 6.39  | 9.40  | 9.52  | 9.77  | 9.94  | 10.25 | 10.28 | 10.49 | 10.69 | 10.80 | 10.98 | 11.17 |
| 6.53  | 9.38  | 9.64  | 9.76  | 9.98  | 10.17 | 10.35 | 10.57 | 10.80 | 10.91 | 11.09 | 11.19 |
| 6.69  | 9.68  | 9.82  | 10.03 | 10.29 | 10.52 | 10.61 | 10.80 | 11.00 | 11.09 | 11.24 | 11.46 |
| 6.85  | 9.37  | 9.53  | 9.74  | 9.87  | 10.23 | 10.36 | 10.58 | 10.75 | 10.84 | 11.01 | 11.21 |
| 7.03  | 9.47  | 9.69  | 9.95  | 10.08 | 10.47 | 10.55 | 10.69 | 10.79 | 11.03 | 11.18 | 11.32 |
| 7.21  | 9.50  | 9.76  | 9.92  | 10.15 | 10.39 | 10.53 | 10.71 | 10.98 | 11.00 | 11.19 | 11.33 |
| 7.41  | 9.65  | 9.88  | 9.91  | 10.14 | 10.50 | 10.66 | 10.74 | 10.92 | 11.21 | 11.34 | 11.46 |
| 7.63  | 9.97  | 10.11 | 10.34 | 10.55 | 10.80 | 10.97 | 11.23 | 11.39 | 11.51 | 11.63 | 11.81 |
| 7.86  | 9.50  | 9.76  | 9.97  | 10.14 | 10.43 | 10.57 | 10.72 | 10.85 | 11.09 | 11.20 | 11.25 |
| 8.10  | 9.42  | 9.63  | 9.92  | 10.09 | 10.34 | 10.43 | 10.69 | 10.89 | 11.05 | 11.19 | 11.26 |
| 8.36  | 9.12  | 9.26  | 9.55  | 9.79  | 9.99  | 10.17 | 10.32 | 10.52 | 10.69 | 10.81 | 11.01 |
| 8.64  | 9.57  | 9.76  | 9.94  | 10.15 | 10.43 | 10.54 | 10.78 | 10.80 | 11.05 | 11.28 | 11.29 |
| 8.94  | 9.99  | 10.13 | 10.38 | 10.54 | 10.68 | 10.89 | 10.99 | 11.29 | 11.44 | 11.57 | 11.66 |
| 9.26  | 10.12 | 10.32 | 10.54 | 10.72 | 11.02 | 11.13 | 11.24 | 11.52 | 11.69 | 11.87 | 11.92 |
| 9.60  | 9.73  | 9.91  | 10.16 | 10.29 | 10.54 | 10.66 | 10.88 | 11.03 | 11.19 | 11.36 | 11.55 |
| 9.97  | 9.68  | 9.74  | 10.06 | 10.25 | 10.55 | 10.66 | 10.78 | 11.11 | 11.17 | 11.41 | 11.52 |
| 10.36 | 9.85  | 10.01 | 10.36 | 10.50 | 10.75 | 10.93 | 11.02 | 11.20 | 11.33 | 11.51 | 11.69 |
| 10.77 | 9.98  | 10.08 | 10.22 | 10.49 | 10.74 | 10.97 | 11.12 | 11.35 | 11.39 | 11.62 | 11.79 |
| 11.22 | 9.80  | 9.98  | 10.24 | 10.39 | 10.60 | 10.71 | 10.84 | 11.05 | 11.28 | 11.43 | 11.50 |
| 11.70 | 9.87  | 10.06 | 10.26 | 10.54 | 10.72 | 10.92 | 11.02 | 11.18 | 11.40 | 11.53 | 11.67 |
| 12.21 | 9.52  | 9.66  | 9.91  | 10.13 | 10.35 | 10.50 | 10.73 | 10.78 | 10.96 | 11.17 | 11.37 |
| 12.75 | 9.76  | 10.08 | 10.23 | 10.44 | 10.74 | 10.85 | 11.00 | 11.15 | 11.36 | 11.57 | 11.64 |
| 13.33 | 10.03 | 10.25 | 10.46 | 10.71 | 10.94 | 11.04 | 11.25 | 11.43 | 11.63 | 11.65 | 11.86 |
| 13.95 | 9.84  | 10.07 | 10.24 | 10.36 | 10.75 | 10.78 | 11.02 | 11.25 | 11.32 | 11.47 | 11.64 |
| 14.62 | 9.50  | 9.74  | 9.95  | 10.20 | 10.41 | 10.52 | 10.81 | 11.00 | 11.06 | 11.27 | 11.46 |
| 15.33 | 9.45  | 9.68  | 9.87  | 10.15 | 10.41 | 10.53 | 10.70 | 10.96 | 11.05 | 11.20 | 11.42 |
| 16.09 | 9.54  | 9.81  | 10.01 | 10.18 | 10.45 | 10.63 | 10.84 | 10.99 | 11.14 | 11.32 | 11.45 |
| 16.90 | 9.81  | 10.04 | 10.34 | 10.52 | 10.69 | 10.92 | 11.08 | 11.24 | 11.40 | 11.59 | 11.71 |
| 17.77 | 9.79  | 10.00 | 10.28 | 10.55 | 10.72 | 10.81 | 10.99 | 11.05 | 11.28 | 11.54 | 11.64 |
| 18.70 | 9.67  | 9.83  | 10.00 | 10.31 | 10.49 | 10.54 | 10.87 | 11.06 | 11.13 | 11.42 | 11.55 |
| 19.69 | 9.71  | 9.93  | 10.18 | 10.49 | 10.64 | 10.80 | 11.05 | 11.26 | 11.36 | 11.48 | 11.70 |
| 20.75 | 9.56  | 9.81  | 10.04 | 10.29 | 10.52 | 10.68 | 10.79 | 11.03 | 11.14 | 11.33 | 11.53 |
| 21.89 | 10.08 | 10.33 | 10.53 | 10.73 | 10.94 | 11.18 | 11.28 | 11.47 | 11.65 | 11.82 | 11.97 |
| 23.10 | 10.33 | 10.46 | 10.63 | 10.93 | 11.18 | 11.21 | 11.42 | 11.69 | 11.88 | 12.04 | 12.07 |

|        |       |       |       |       |       |       |       |       |       |       |       |
|--------|-------|-------|-------|-------|-------|-------|-------|-------|-------|-------|-------|
| 24.39  | 9.83  | 10.04 | 10.28 | 10.46 | 10.71 | 10.84 | 11.00 | 11.22 | 11.35 | 11.50 | 11.60 |
| 25.78  | 9.89  | 10.22 | 10.47 | 10.61 | 10.95 | 11.05 | 11.32 | 11.42 | 11.59 | 11.86 | 11.87 |
| 27.26  | 9.94  | 10.13 | 10.34 | 10.57 | 10.83 | 10.95 | 11.12 | 11.37 | 11.48 | 11.67 | 11.76 |
| 28.84  | 9.87  | 10.13 | 10.31 | 10.52 | 10.73 | 10.94 | 11.08 | 11.29 | 11.50 | 11.67 | 11.80 |
| 30.53  | 10.02 | 10.25 | 10.49 | 10.64 | 10.95 | 11.15 | 11.21 | 11.42 | 11.60 | 11.83 | 11.99 |
| 32.34  | 9.62  | 9.81  | 10.13 | 10.29 | 10.56 | 10.70 | 11.03 | 11.11 | 11.21 | 11.49 | 11.62 |
| 34.27  | 9.92  | 10.22 | 10.37 | 10.61 | 10.93 | 11.04 | 11.22 | 11.44 | 11.66 | 11.74 | 11.95 |
| 36.34  | 9.69  | 9.92  | 10.14 | 10.31 | 10.56 | 10.72 | 11.04 | 11.13 | 11.33 | 11.52 | 11.68 |
| 38.55  | 9.96  | 10.12 | 10.33 | 10.66 | 10.87 | 11.07 | 11.22 | 11.48 | 11.58 | 11.74 | 11.98 |
| 40.91  | 9.88  | 10.17 | 10.29 | 10.54 | 10.82 | 11.00 | 11.12 | 11.32 | 11.48 | 11.59 | 11.82 |
| 43.43  | 9.55  | 9.81  | 9.97  | 10.26 | 10.54 | 10.66 | 10.83 | 11.01 | 11.24 | 11.40 | 11.48 |
| 46.13  | 9.63  | 9.87  | 10.11 | 10.36 | 10.56 | 10.74 | 10.85 | 11.09 | 11.28 | 11.38 | 11.60 |
| 49.01  | 9.89  | 10.10 | 10.39 | 10.66 | 10.87 | 11.05 | 11.25 | 11.45 | 11.56 | 11.85 | 11.93 |
| 52.09  | 9.67  | 9.86  | 10.21 | 10.42 | 10.67 | 10.83 | 11.06 | 11.24 | 11.38 | 11.58 | 11.75 |
| 55.39  | 9.50  | 9.80  | 10.03 | 10.31 | 10.53 | 10.72 | 10.92 | 11.16 | 11.30 | 11.51 | 11.69 |
| 58.91  | 9.52  | 9.81  | 10.06 | 10.28 | 10.57 | 10.76 | 10.94 | 11.06 | 11.31 | 11.45 | 11.65 |
| 62.68  | 9.59  | 9.78  | 10.06 | 10.32 | 10.59 | 10.80 | 10.97 | 11.14 | 11.36 | 11.61 | 11.72 |
| 66.70  | 9.63  | 9.79  | 10.11 | 10.27 | 10.58 | 10.76 | 10.94 | 11.22 | 11.37 | 11.54 | 11.70 |
| 71.00  | 9.53  | 9.95  | 10.10 | 10.31 | 10.69 | 10.74 | 11.04 | 11.19 | 11.40 | 11.64 | 11.83 |
| 75.60  | 9.37  | 9.68  | 9.91  | 10.10 | 10.39 | 10.59 | 10.71 | 10.95 | 11.11 | 11.39 | 11.54 |
| 80.51  | 9.50  | 9.78  | 10.06 | 10.28 | 10.62 | 10.76 | 10.95 | 11.04 | 11.35 | 11.57 | 11.70 |
| 85.77  | 9.60  | 9.87  | 10.27 | 10.55 | 10.75 | 10.98 | 11.18 | 11.47 | 11.62 | 11.77 | 11.95 |
| 91.38  | 9.63  | 9.89  | 10.19 | 10.43 | 10.67 | 10.84 | 11.09 | 11.22 | 11.39 | 11.61 | 11.83 |
| 97.39  | 9.39  | 9.60  | 9.90  | 10.24 | 10.52 | 10.80 | 10.93 | 11.20 | 11.32 | 11.51 | 11.76 |
| 103.80 | 9.67  | 9.99  | 10.25 | 10.51 | 10.91 | 11.08 | 11.21 | 11.46 | 11.72 | 11.91 | 12.03 |
| 110.66 | 9.35  | 9.66  | 9.96  | 10.21 | 10.48 | 10.70 | 10.98 | 11.07 | 11.38 | 11.55 | 11.65 |
| 117.99 | 9.37  | 9.62  | 9.99  | 10.19 | 10.48 | 10.72 | 10.88 | 11.08 | 11.34 | 11.64 | 11.75 |
| 125.83 | 9.62  | 9.91  | 10.22 | 10.41 | 10.76 | 10.94 | 11.17 | 11.36 | 11.50 | 11.85 | 11.99 |
| 134.21 | 9.42  | 9.62  | 10.05 | 10.27 | 10.63 | 10.78 | 11.01 | 11.23 | 11.44 | 11.64 | 11.83 |
| 143.17 | 9.27  | 9.52  | 9.91  | 10.12 | 10.47 | 10.72 | 10.93 | 11.11 | 11.35 | 11.65 | 11.72 |
| 152.74 | 9.53  | 9.78  | 10.16 | 10.41 | 10.68 | 10.85 | 11.09 | 11.26 | 11.43 | 11.68 | 11.78 |
| 162.97 | 9.96  | 10.20 | 10.33 | 10.68 | 10.90 | 11.12 | 11.24 | 11.58 | 11.64 | 11.92 | 12.08 |
| 173.91 | 9.78  | 10.04 | 10.28 | 10.54 | 10.79 | 10.99 | 11.20 | 11.41 | 11.59 | 11.77 | 11.89 |
| 185.60 | 10.00 | 10.28 | 10.46 | 10.76 | 11.01 | 11.22 | 11.40 | 11.53 | 11.82 | 11.91 | 12.07 |
| 198.10 | 9.75  | 10.01 | 10.27 | 10.56 | 10.82 | 11.05 | 11.15 | 11.46 | 11.65 | 11.78 | 12.02 |
| 211.46 | 9.97  | 10.22 | 10.35 | 10.71 | 10.91 | 11.07 | 11.27 | 11.45 | 11.72 | 11.94 | 12.08 |
| 225.75 | 9.91  | 10.09 | 10.51 | 10.72 | 11.00 | 11.14 | 11.38 | 11.59 | 11.80 | 11.92 | 12.10 |
| 241.01 | 9.75  | 10.04 | 10.14 | 10.39 | 10.74 | 10.90 | 11.18 | 11.42 | 11.60 | 11.76 | 11.95 |
| 257.33 | 9.85  | 10.05 | 10.32 | 10.54 | 10.79 | 11.05 | 11.32 | 11.45 | 11.69 | 11.88 | 12.04 |
| 274.77 | 9.96  | 10.28 | 10.53 | 10.72 | 11.06 | 11.18 | 11.39 | 11.69 | 11.85 | 11.98 | 12.26 |
| 293.42 | 10.06 | 10.29 | 10.47 | 10.71 | 11.03 | 11.19 | 11.40 | 11.61 | 11.90 | 12.05 | 12.20 |
| 313.35 | 9.82  | 10.13 | 10.49 | 10.69 | 10.92 | 11.11 | 11.30 | 11.52 | 11.73 | 11.91 | 12.04 |
| 334.66 | 10.00 | 10.27 | 10.50 | 10.80 | 11.11 | 11.23 | 11.49 | 11.73 | 11.90 | 12.12 | 12.19 |
| 357.43 | 9.85  | 10.13 | 10.36 | 10.62 | 10.97 | 11.13 | 11.35 | 11.58 | 11.82 | 12.06 | 12.24 |
| 381.78 | 9.80  | 10.00 | 10.27 | 10.48 | 10.78 | 10.97 | 11.15 | 11.30 | 11.55 | 11.78 | 11.94 |
| 407.80 | 9.74  | 10.03 | 10.22 | 10.50 | 10.79 | 10.95 | 11.30 | 11.44 | 11.63 | 11.80 | 11.98 |
| 435.62 | 10.08 | 10.27 | 10.61 | 10.74 | 11.06 | 11.31 | 11.61 | 11.75 | 11.98 | 12.10 | 12.38 |
| 465.35 | 9.83  | 10.09 | 10.39 | 10.61 | 10.92 | 11.00 | 11.28 | 11.45 | 11.66 | 11.84 | 12.11 |
| 497.14 | 9.71  | 10.04 | 10.24 | 10.58 | 10.79 | 10.98 | 11.25 | 11.45 | 11.68 | 11.87 | 12.07 |
| 531.11 | 9.64  | 9.86  | 10.07 | 10.38 | 10.67 | 10.83 | 11.07 | 11.27 | 11.48 | 11.70 | 11.86 |

|         |      |       |       |       |       |       |       |       |       |       |       |
|---------|------|-------|-------|-------|-------|-------|-------|-------|-------|-------|-------|
| 567.43  | 9.93 | 10.16 | 10.41 | 10.68 | 10.99 | 11.19 | 11.47 | 11.64 | 11.80 | 12.07 | 12.20 |
| 606.26  | 9.72 | 10.04 | 10.35 | 10.58 | 10.83 | 11.05 | 11.28 | 11.53 | 11.74 | 11.96 | 12.15 |
| 647.76  | 9.89 | 10.10 | 10.38 | 10.59 | 10.94 | 11.05 | 11.25 | 11.43 | 11.77 | 11.92 | 12.10 |
| 692.12  | 9.44 | 9.68  | 9.98  | 10.19 | 10.44 | 10.70 | 10.92 | 11.14 | 11.28 | 11.61 | 11.66 |
| 739.53  | 9.76 | 10.04 | 10.25 | 10.52 | 10.91 | 11.06 | 11.35 | 11.54 | 11.66 | 11.86 | 12.00 |
| 790.22  | 9.63 | 9.85  | 10.03 | 10.39 | 10.71 | 10.88 | 11.15 | 11.31 | 11.50 | 11.76 | 11.94 |
| 844.40  | 9.65 | 9.87  | 10.17 | 10.41 | 10.71 | 11.02 | 11.13 | 11.43 | 11.56 | 11.87 | 11.94 |
| 902.32  | 9.71 | 10.09 | 10.33 | 10.51 | 10.89 | 11.09 | 11.28 | 11.47 | 11.71 | 12.00 | 12.09 |
| 964.23  | 9.46 | 9.67  | 9.95  | 10.17 | 10.54 | 10.66 | 10.94 | 11.28 | 11.48 | 11.56 | 11.76 |
| 1030.41 | 9.72 | 9.94  | 10.24 | 10.55 | 10.82 | 10.91 | 11.21 | 11.45 | 11.61 | 11.81 | 11.91 |
| 1101.15 | 9.64 | 9.88  | 10.11 | 10.39 | 10.70 | 10.80 | 11.15 | 11.30 | 11.50 | 11.74 | 11.83 |
| 1176.77 | 9.64 | 9.92  | 10.18 | 10.42 | 10.72 | 10.96 | 11.14 | 11.31 | 11.56 | 11.77 | 11.91 |
| 1257.60 | 9.65 | 9.95  | 10.17 | 10.46 | 10.78 | 10.91 | 11.16 | 11.32 | 11.55 | 11.72 | 11.96 |
| 1344.00 | 9.49 | 9.81  | 10.16 | 10.41 | 10.61 | 10.87 | 11.15 | 11.24 | 11.56 | 11.68 | 11.81 |
| 1436.36 | 9.54 | 9.74  | 10.01 | 10.22 | 10.55 | 10.70 | 10.99 | 11.11 | 11.37 | 11.61 | 11.69 |
| 1535.09 | 9.60 | 9.91  | 10.19 | 10.43 | 10.75 | 10.97 | 11.16 | 11.34 | 11.63 | 11.81 | 11.94 |
| 1640.63 | 9.32 | 9.57  | 9.88  | 10.22 | 10.50 | 10.73 | 10.94 | 11.16 | 11.46 | 11.62 | 11.78 |
| 1753.44 | 9.43 | 9.68  | 9.96  | 10.25 | 10.54 | 10.69 | 10.96 | 11.13 | 11.38 | 11.57 | 11.77 |
| 1874.02 | 9.33 | 9.52  | 9.75  | 10.13 | 10.32 | 10.68 | 10.91 | 11.08 | 11.28 | 11.57 | 11.66 |
| 2002.92 | 9.46 | 9.62  | 9.85  | 10.20 | 10.48 | 10.70 | 10.92 | 11.02 | 11.23 | 11.51 | 11.71 |
| 2140.71 | 9.09 | 9.32  | 9.70  | 9.91  | 10.21 | 10.43 | 10.72 | 10.94 | 11.02 | 11.23 | 11.40 |
| 2288.00 | 9.14 | 9.44  | 9.77  | 10.07 | 10.38 | 10.55 | 10.78 | 10.98 | 11.09 | 11.48 | 11.61 |
| 2445.44 | 9.03 | 9.35  | 9.62  | 9.96  | 10.25 | 10.42 | 10.58 | 10.89 | 11.10 | 11.28 | 11.42 |
| 2613.73 | 9.28 | 9.53  | 9.78  | 10.15 | 10.51 | 10.66 | 10.92 | 11.16 | 11.26 | 11.40 | 11.60 |
| 2793.63 | 9.18 | 9.37  | 9.62  | 9.88  | 10.27 | 10.44 | 10.62 | 10.87 | 11.05 | 11.25 | 11.39 |
| 2985.93 | 8.80 | 9.10  | 9.33  | 9.65  | 9.98  | 10.19 | 10.41 | 10.64 | 10.83 | 11.12 | 11.26 |
| 3191.49 | 8.88 | 9.18  | 9.43  | 9.72  | 9.98  | 10.30 | 10.46 | 10.61 | 10.85 | 11.00 | 11.18 |
| 3411.21 | 8.81 | 9.10  | 9.32  | 9.62  | 9.94  | 10.20 | 10.40 | 10.53 | 10.74 | 10.86 | 11.12 |
| 3646.09 | 8.85 | 9.19  | 9.33  | 9.65  | 9.90  | 10.24 | 10.38 | 10.57 | 10.81 | 10.82 | 11.04 |
| 3897.16 | 8.75 | 9.04  | 9.34  | 9.57  | 9.82  | 10.06 | 10.29 | 10.46 | 10.64 | 10.87 | 10.93 |

| Wavelength<br>(nm) | 553.39 | 554.82 | 556.24 | 557.67 | 559.09 | 560.51 | 561.94 | 563.36 | 564.79 | 566.21 | 567.63 |      |
|--------------------|--------|--------|--------|--------|--------|--------|--------|--------|--------|--------|--------|------|
| Time<br>(ps)       | -2.74  | 0.04   | 0.07   | 0.00   | 0.04   | 0.00   | -0.07  | 0.01   | 0.03   | 0.10   | 0.12   | 0.04 |
| -2.24              | -0.11  | -0.02  | 0.00   | -0.05  | 0.00   | -0.04  | -0.04  | -0.06  | -0.02  | -0.10  | -0.12  |      |
| -1.74              | 0.00   | -0.02  | -0.06  | -0.05  | 0.00   | -0.04  | -0.08  | 0.00   | -0.01  | -0.07  | -0.03  |      |
| -1.24              | 0.00   | -0.07  | -0.03  | 0.04   | -0.02  | -0.01  | -0.01  | 0.03   | -0.06  | -0.03  | -0.05  |      |
| -0.74              | 0.09   | 0.01   | 0.00   | 0.03   | 0.03   | 0.08   | -0.03  | -0.03  | 0.03   | 0.07   | -0.03  |      |
| -0.24              | -0.04  | -0.04  | -0.02  | -0.01  | -0.04  | 0.00   | -0.01  | 0.00   | -0.07  | -0.02  | 0.02   |      |
| -0.14              | 0.05   | 0.00   | 0.03   | -0.03  | -0.05  | 0.08   | 0.03   | -0.01  | -0.02  | -0.01  | 0.07   |      |
| -0.04              | -0.03  | 0.07   | 0.09   | 0.03   | 0.07   | 0.01   | 0.13   | 0.05   | 0.05   | 0.03   | 0.09   |      |
| 0.06               | -0.07  | -0.05  | -0.03  | -0.03  | -0.06  | -0.06  | -0.01  | -0.09  | -0.03  | -0.06  | -0.07  |      |
| 0.16               | -0.09  | -0.11  | 0.05   | -0.04  | 0.01   | -0.09  | -0.06  | 0.05   | -0.07  | 0.00   | -0.01  |      |
| 0.26               | 0.07   | -0.01  | -0.03  | -0.12  | -0.08  | -0.04  | -0.01  | -0.08  | -0.02  | -0.09  | -0.03  |      |
| 0.31               | 0.03   | -0.03  | -0.13  | -0.08  | 0.03   | 0.00   | 0.01   | -0.04  | 0.11   | -0.03  | -0.08  |      |
| 0.36               | 0.05   | -0.06  | -0.01  | -0.06  | -0.04  | -0.03  | 0.07   | -0.01  | 0.03   | 0.01   | -0.03  |      |
| 0.41               | -0.02  | 0.04   | -0.07  | -0.04  | -0.07  | 0.08   | -0.08  | -0.05  | -0.03  | -0.02  | -0.08  |      |
| 0.46               | -0.02  | 0.01   | 0.02   | 0.03   | 0.00   | 0.04   | 0.06   | 0.03   | 0.06   | -0.03  | 0.06   |      |
| 0.51               | 0.00   | 0.03   | 0.00   | -0.03  | -0.07  | 0.04   | 0.01   | 0.04   | 0.06   | -0.02  | 0.06   |      |

|      |        |        |        |        |        |        |        |        |        |        |        |
|------|--------|--------|--------|--------|--------|--------|--------|--------|--------|--------|--------|
| 0.56 | 0.02   | 0.04   | 0.03   | 0.02   | 0.04   | 0.10   | -0.01  | -0.06  | 0.04   | -0.03  | 0.04   |
| 0.61 | -0.04  | 0.08   | 0.02   | -0.01  | -0.03  | -0.05  | -0.03  | -0.06  | 0.09   | -0.02  | -0.06  |
| 0.66 | 0.03   | 0.00   | -0.05  | 0.01   | 0.04   | 0.03   | 0.00   | -0.02  | 0.03   | -0.02  | -0.05  |
| 0.71 | 0.01   | -0.05  | 0.02   | 0.07   | -0.02  | 0.04   | 0.01   | -0.01  | 0.06   | 0.01   | 0.06   |
| 0.76 | -0.13  | -0.06  | -0.07  | -0.03  | -0.07  | -0.06  | 0.00   | -0.12  | -0.07  | -0.12  | -0.05  |
| 0.81 | -0.01  | 0.01   | 0.00   | 0.04   | 0.10   | -0.01  | -0.02  | 0.01   | 0.06   | -0.01  | 0.00   |
| 0.86 | -0.03  | 0.04   | 0.02   | -0.01  | -0.03  | -0.02  | 0.00   | -0.02  | 0.08   | -0.08  | -0.07  |
| 0.91 | -0.01  | 0.08   | -0.03  | -0.01  | -0.01  | -0.02  | -0.05  | 0.00   | 0.05   | -0.02  | 0.03   |
| 0.96 | -0.02  | 0.09   | -0.01  | -0.03  | 0.02   | -0.01  | 0.00   | -0.04  | 0.06   | -0.09  | 0.03   |
| 1.01 | -0.04  | -0.03  | -0.11  | -0.01  | -0.09  | -0.11  | -0.09  | -0.09  | -0.01  | 0.00   | -0.07  |
| 1.06 | -0.06  | 0.01   | -0.11  | 0.06   | 0.04   | 0.03   | 0.01   | -0.04  | 0.06   | 0.09   | -0.03  |
| 1.11 | 0.13   | -0.03  | -0.07  | 0.00   | 0.01   | -0.02  | -0.01  | -0.01  | 0.03   | -0.02  | 0.07   |
| 1.16 | -0.04  | 0.00   | -0.04  | -0.24  | 0.00   | 0.07   | -0.04  | -0.02  | -0.05  | 0.07   | -0.06  |
| 1.21 | 0.29   | 0.18   | 0.14   | 0.09   | 0.14   | 0.12   | -0.08  | -0.19  | -0.11  | -0.07  | 0.02   |
| 1.26 | 2.39   | 3.87   | 3.76   | 2.59   | 0.92   | -0.79  | -2.33  | -3.36  | -3.73  | -3.60  | -2.98  |
| 1.31 | 30.53  | 15.54  | 1.66   | -10.68 | -21.68 | -31.85 | -41.46 | -50.20 | -58.03 | -64.57 | -70.03 |
| 1.36 | 286.18 | 288.98 | 288.48 | 285.47 | 281.19 | 274.42 | 265.73 | 256.01 | 245.12 | 232.48 | 219.00 |
| 1.41 | -42.50 | -51.99 | -61.39 | -70.54 | -78.84 | -85.73 | -91.05 | -94.61 | -96.27 | -95.31 | -92.91 |
| 1.46 | 19.68  | 20.58  | 21.11  | 21.48  | 21.62  | 21.90  | 21.95  | 21.94  | 21.96  | 21.95  | 21.66  |
| 1.51 | 14.31  | 14.33  | 14.34  | 14.26  | 14.17  | 14.30  | 14.27  | 14.16  | 14.09  | 13.96  | 13.95  |
| 1.56 | 12.71  | 12.60  | 12.50  | 12.59  | 12.54  | 12.65  | 12.71  | 12.95  | 13.13  | 13.28  | 13.57  |
| 1.61 | 12.04  | 12.33  | 12.64  | 12.90  | 13.13  | 13.52  | 13.68  | 13.90  | 14.06  | 14.15  | 14.24  |
| 1.66 | 12.13  | 12.30  | 12.58  | 12.85  | 12.97  | 13.23  | 13.41  | 13.55  | 13.66  | 13.75  | 13.84  |
| 1.71 | 12.53  | 12.71  | 12.80  | 12.90  | 12.83  | 12.91  | 12.79  | 12.67  | 12.70  | 12.66  | 12.71  |
| 1.76 | 11.76  | 12.03  | 12.21  | 12.40  | 12.63  | 12.75  | 12.85  | 12.94  | 13.01  | 13.02  | 13.07  |
| 1.81 | 11.13  | 11.19  | 11.27  | 11.29  | 11.36  | 11.58  | 11.68  | 11.80  | 12.04  | 12.18  | 12.40  |
| 1.86 | 11.75  | 11.94  | 12.08  | 12.21  | 12.33  | 12.47  | 12.51  | 12.56  | 12.62  | 12.60  | 12.69  |
| 1.91 | 11.10  | 11.32  | 11.42  | 11.51  | 11.74  | 11.99  | 12.02  | 12.09  | 12.27  | 12.28  | 12.34  |
| 1.96 | 11.53  | 11.50  | 11.41  | 11.43  | 11.45  | 11.52  | 11.56  | 11.56  | 11.69  | 11.78  | 11.87  |
| 2.01 | 11.26  | 11.46  | 11.67  | 11.89  | 12.04  | 12.14  | 12.20  | 12.29  | 12.36  | 12.39  | 12.46  |
| 2.06 | 11.05  | 11.13  | 11.23  | 11.50  | 11.61  | 11.80  | 12.00  | 12.08  | 12.28  | 12.35  | 12.38  |
| 2.11 | 11.68  | 11.82  | 11.89  | 11.92  | 11.91  | 12.02  | 12.05  | 12.03  | 12.05  | 12.12  | 12.14  |
| 2.16 | 10.90  | 11.09  | 11.30  | 11.50  | 11.59  | 11.83  | 11.85  | 11.94  | 12.05  | 12.13  | 12.15  |
| 2.21 | 11.22  | 11.37  | 11.37  | 11.46  | 11.64  | 11.83  | 12.00  | 12.06  | 12.35  | 12.36  | 12.58  |
| 2.26 | 11.78  | 12.04  | 12.11  | 12.19  | 12.21  | 12.30  | 12.36  | 12.42  | 12.38  | 12.32  | 12.37  |
| 2.31 | 10.96  | 11.09  | 11.19  | 11.37  | 11.50  | 11.65  | 11.73  | 11.89  | 11.99  | 11.99  | 12.11  |
| 2.36 | 11.01  | 11.06  | 11.17  | 11.26  | 11.26  | 11.35  | 11.44  | 11.54  | 11.67  | 11.76  | 11.87  |
| 2.41 | 11.06  | 11.36  | 11.49  | 11.56  | 11.71  | 11.85  | 11.96  | 12.00  | 12.06  | 12.12  | 12.14  |
| 2.46 | 10.66  | 10.90  | 10.94  | 11.17  | 11.21  | 11.44  | 11.52  | 11.66  | 11.79  | 11.88  | 11.87  |
| 2.51 | 11.80  | 11.87  | 11.90  | 11.90  | 11.93  | 11.97  | 12.07  | 11.95  | 12.07  | 12.05  | 12.14  |
| 2.56 | 11.29  | 11.36  | 11.53  | 11.70  | 11.86  | 11.88  | 11.95  | 12.14  | 12.22  | 12.24  | 12.33  |
| 2.61 | 10.79  | 10.89  | 10.96  | 11.19  | 11.27  | 11.38  | 11.46  | 11.53  | 11.66  | 11.71  | 11.83  |
| 2.66 | 11.46  | 11.62  | 11.68  | 11.73  | 11.82  | 11.92  | 11.93  | 12.01  | 12.12  | 12.01  | 12.03  |
| 2.71 | 10.87  | 11.03  | 11.17  | 11.42  | 11.48  | 11.53  | 11.66  | 11.84  | 11.79  | 11.80  | 11.88  |
| 2.76 | 11.29  | 11.38  | 11.41  | 11.53  | 11.63  | 11.75  | 11.87  | 11.96  | 11.97  | 12.09  | 12.23  |
| 2.81 | 11.03  | 11.23  | 11.36  | 11.41  | 11.45  | 11.69  | 11.67  | 11.70  | 11.83  | 11.77  | 11.78  |
| 2.86 | 10.67  | 10.84  | 10.86  | 11.10  | 11.19  | 11.32  | 11.41  | 11.52  | 11.61  | 11.70  | 11.74  |
| 2.91 | 11.26  | 11.29  | 11.42  | 11.51  | 11.57  | 11.65  | 11.73  | 11.81  | 11.88  | 11.94  | 11.88  |
| 2.96 | 11.33  | 11.47  | 11.62  | 11.73  | 11.91  | 12.00  | 11.94  | 12.11  | 12.22  | 12.21  | 12.30  |
| 3.01 | 11.22  | 11.33  | 11.41  | 11.52  | 11.63  | 11.74  | 11.88  | 11.91  | 12.05  | 12.09  | 12.21  |

|      |       |       |       |       |       |       |       |       |       |       |       |
|------|-------|-------|-------|-------|-------|-------|-------|-------|-------|-------|-------|
| 3.06 | 10.95 | 11.07 | 11.15 | 11.26 | 11.40 | 11.44 | 11.37 | 11.54 | 11.55 | 11.56 | 11.63 |
| 3.11 | 10.96 | 11.13 | 11.23 | 11.43 | 11.51 | 11.69 | 11.73 | 11.73 | 11.94 | 11.95 | 12.02 |
| 3.16 | 11.05 | 11.20 | 11.24 | 11.42 | 11.39 | 11.68 | 11.67 | 11.72 | 11.80 | 11.86 | 11.98 |
| 3.21 | 11.15 | 11.31 | 11.40 | 11.39 | 11.54 | 11.61 | 11.70 | 11.70 | 11.79 | 11.82 | 11.94 |
| 3.26 | 10.92 | 11.06 | 11.19 | 11.33 | 11.44 | 11.55 | 11.67 | 11.69 | 11.85 | 11.86 | 11.94 |
| 3.31 | 11.08 | 11.19 | 11.29 | 11.43 | 11.45 | 11.63 | 11.66 | 11.76 | 11.76 | 11.81 | 11.87 |
| 3.36 | 11.33 | 11.50 | 11.59 | 11.72 | 11.82 | 11.94 | 12.02 | 12.03 | 12.14 | 12.21 | 12.20 |
| 3.41 | 11.12 | 11.28 | 11.40 | 11.48 | 11.68 | 11.79 | 11.80 | 11.90 | 12.05 | 12.12 | 12.19 |
| 3.46 | 11.22 | 11.21 | 11.35 | 11.48 | 11.56 | 11.64 | 11.76 | 11.77 | 11.86 | 11.73 | 11.87 |
| 3.51 | 11.12 | 11.31 | 11.40 | 11.53 | 11.74 | 11.82 | 11.94 | 12.05 | 12.05 | 12.08 | 12.17 |
| 3.56 | 11.09 | 11.11 | 11.18 | 11.31 | 11.37 | 11.47 | 11.52 | 11.61 | 11.73 | 11.74 | 11.84 |
| 3.61 | 10.98 | 10.97 | 11.04 | 11.17 | 11.33 | 11.35 | 11.43 | 11.39 | 11.62 | 11.57 | 11.64 |
| 3.66 | 10.84 | 10.88 | 11.02 | 11.11 | 11.23 | 11.40 | 11.56 | 11.56 | 11.62 | 11.69 | 11.61 |
| 3.71 | 11.41 | 11.60 | 11.58 | 11.62 | 11.78 | 11.83 | 11.99 | 11.94 | 12.05 | 12.00 | 12.13 |
| 3.76 | 11.60 | 11.76 | 11.88 | 11.94 | 12.11 | 12.17 | 12.27 | 12.34 | 12.38 | 12.36 | 12.49 |
| 3.81 | 10.77 | 10.94 | 11.02 | 11.17 | 11.18 | 11.42 | 11.54 | 11.59 | 11.58 | 11.65 | 11.76 |
| 3.86 | 10.85 | 10.94 | 11.06 | 11.11 | 11.18 | 11.33 | 11.33 | 11.41 | 11.45 | 11.50 | 11.59 |
| 3.91 | 11.36 | 11.52 | 11.65 | 11.67 | 11.85 | 11.87 | 11.91 | 12.10 | 12.12 | 12.24 | 12.28 |
| 3.96 | 11.20 | 11.32 | 11.39 | 11.55 | 11.58 | 11.73 | 11.84 | 11.87 | 11.97 | 11.97 | 12.05 |
| 4.01 | 11.40 | 11.54 | 11.64 | 11.76 | 11.79 | 11.88 | 11.99 | 12.10 | 12.10 | 12.16 | 12.14 |
| 4.06 | 11.30 | 11.47 | 11.60 | 11.65 | 11.78 | 11.91 | 11.98 | 12.02 | 12.18 | 12.06 | 12.24 |
| 4.11 | 11.15 | 11.33 | 11.36 | 11.49 | 11.61 | 11.71 | 11.77 | 11.84 | 11.98 | 12.03 | 12.04 |
| 4.16 | 11.34 | 11.47 | 11.64 | 11.67 | 11.85 | 11.90 | 11.94 | 12.03 | 12.08 | 12.15 | 12.19 |
| 4.21 | 11.62 | 11.81 | 11.86 | 12.11 | 12.12 | 12.25 | 12.28 | 12.37 | 12.52 | 12.43 | 12.48 |
| 4.26 | 11.31 | 11.42 | 11.48 | 11.57 | 11.63 | 11.74 | 11.84 | 11.84 | 11.96 | 11.97 | 12.00 |
| 4.31 | 11.03 | 11.17 | 11.38 | 11.49 | 11.59 | 11.64 | 11.69 | 11.77 | 11.86 | 11.97 | 11.97 |
| 4.36 | 11.13 | 11.26 | 11.43 | 11.52 | 11.64 | 11.70 | 11.77 | 11.90 | 11.91 | 11.91 | 12.02 |
| 4.41 | 11.03 | 11.13 | 11.31 | 11.44 | 11.47 | 11.57 | 11.64 | 11.67 | 11.73 | 11.82 | 11.92 |
| 4.46 | 11.45 | 11.64 | 11.79 | 11.88 | 11.99 | 12.15 | 12.12 | 12.23 | 12.30 | 12.35 | 12.38 |
| 4.51 | 11.36 | 11.41 | 11.59 | 11.67 | 11.69 | 11.87 | 11.92 | 11.99 | 12.05 | 12.10 | 12.19 |
| 4.56 | 11.07 | 11.27 | 11.35 | 11.42 | 11.52 | 11.61 | 11.68 | 11.79 | 11.77 | 11.91 | 11.90 |
| 4.61 | 10.91 | 11.03 | 11.16 | 11.30 | 11.37 | 11.50 | 11.60 | 11.61 | 11.73 | 11.70 | 11.80 |
| 4.66 | 11.30 | 11.50 | 11.62 | 11.68 | 11.76 | 11.93 | 11.94 | 11.94 | 12.08 | 12.08 | 12.18 |
| 4.71 | 11.36 | 11.48 | 11.57 | 11.69 | 11.85 | 11.90 | 11.95 | 12.03 | 12.06 | 12.03 | 12.17 |
| 4.76 | 11.62 | 11.72 | 11.84 | 11.94 | 12.01 | 12.18 | 12.21 | 12.37 | 12.43 | 12.43 | 12.46 |
| 4.81 | 11.17 | 11.30 | 11.41 | 11.56 | 11.60 | 11.67 | 11.77 | 11.77 | 11.98 | 11.88 | 11.96 |
| 4.86 | 10.99 | 11.20 | 11.30 | 11.43 | 11.54 | 11.59 | 11.69 | 11.74 | 11.82 | 11.85 | 11.93 |
| 4.91 | 11.55 | 11.69 | 11.72 | 11.81 | 11.94 | 12.06 | 12.10 | 12.12 | 12.33 | 12.28 | 12.35 |
| 4.96 | 11.26 | 11.36 | 11.48 | 11.63 | 11.68 | 11.76 | 11.85 | 11.92 | 12.03 | 11.98 | 12.09 |
| 5.01 | 11.20 | 11.33 | 11.43 | 11.57 | 11.66 | 11.79 | 11.85 | 11.93 | 12.04 | 12.09 | 12.08 |
| 5.06 | 11.35 | 11.43 | 11.60 | 11.65 | 11.79 | 11.81 | 11.90 | 12.00 | 12.10 | 12.11 | 12.11 |
| 5.11 | 11.18 | 11.23 | 11.41 | 11.49 | 11.57 | 11.65 | 11.77 | 11.76 | 11.85 | 11.89 | 11.88 |
| 5.16 | 10.99 | 11.17 | 11.33 | 11.40 | 11.47 | 11.66 | 11.64 | 11.79 | 11.79 | 11.75 | 11.92 |
| 5.21 | 11.16 | 11.34 | 11.45 | 11.59 | 11.64 | 11.75 | 11.88 | 11.93 | 12.04 | 12.03 | 12.10 |
| 5.26 | 11.58 | 11.68 | 11.66 | 11.88 | 11.90 | 12.06 | 12.12 | 12.29 | 12.28 | 12.27 | 12.35 |
| 5.31 | 11.34 | 11.46 | 11.57 | 11.70 | 11.75 | 11.86 | 11.98 | 12.01 | 12.09 | 12.12 | 12.16 |
| 5.38 | 11.19 | 11.40 | 11.49 | 11.57 | 11.69 | 11.85 | 11.92 | 11.92 | 11.96 | 12.04 | 12.07 |
| 5.45 | 11.58 | 11.74 | 11.86 | 11.97 | 12.00 | 12.14 | 12.22 | 12.32 | 12.30 | 12.45 | 12.43 |
| 5.53 | 11.41 | 11.45 | 11.57 | 11.67 | 11.87 | 11.88 | 11.99 | 12.03 | 12.09 | 12.12 | 12.18 |
| 5.61 | 11.58 | 11.78 | 11.85 | 12.00 | 12.10 | 12.13 | 12.30 | 12.29 | 12.44 | 12.45 | 12.48 |

|       |       |       |       |       |       |       |       |       |       |       |       |
|-------|-------|-------|-------|-------|-------|-------|-------|-------|-------|-------|-------|
| 5.70  | 11.43 | 11.63 | 11.67 | 11.82 | 11.89 | 12.00 | 12.05 | 12.12 | 12.26 | 12.22 | 12.33 |
| 5.80  | 11.57 | 11.78 | 11.88 | 12.01 | 12.07 | 12.20 | 12.26 | 12.32 | 12.40 | 12.40 | 12.46 |
| 5.90  | 11.16 | 11.32 | 11.39 | 11.52 | 11.63 | 11.62 | 11.74 | 11.78 | 11.90 | 11.89 | 11.94 |
| 6.01  | 11.77 | 11.97 | 12.01 | 12.13 | 12.27 | 12.35 | 12.37 | 12.46 | 12.53 | 12.48 | 12.52 |
| 6.13  | 11.43 | 11.56 | 11.66 | 11.77 | 11.89 | 11.95 | 12.08 | 12.10 | 12.22 | 12.13 | 12.28 |
| 6.25  | 11.15 | 11.27 | 11.47 | 11.44 | 11.56 | 11.67 | 11.77 | 11.88 | 11.93 | 11.97 | 11.91 |
| 6.39  | 11.26 | 11.39 | 11.51 | 11.57 | 11.76 | 11.80 | 11.95 | 11.94 | 12.02 | 12.00 | 12.01 |
| 6.53  | 11.31 | 11.54 | 11.59 | 11.64 | 11.74 | 11.84 | 11.91 | 12.04 | 12.09 | 12.06 | 12.11 |
| 6.69  | 11.55 | 11.73 | 11.80 | 11.86 | 11.96 | 12.05 | 12.23 | 12.17 | 12.27 | 12.24 | 12.40 |
| 6.85  | 11.37 | 11.43 | 11.53 | 11.73 | 11.80 | 11.88 | 11.87 | 11.99 | 12.03 | 12.08 | 12.15 |
| 7.03  | 11.54 | 11.60 | 11.72 | 11.83 | 11.87 | 11.99 | 12.05 | 12.15 | 12.24 | 12.28 | 12.20 |
| 7.21  | 11.50 | 11.69 | 11.77 | 11.86 | 11.87 | 12.00 | 12.13 | 12.21 | 12.19 | 12.22 | 12.27 |
| 7.41  | 11.60 | 11.68 | 11.82 | 11.92 | 11.95 | 12.05 | 12.14 | 12.25 | 12.33 | 12.22 | 12.29 |
| 7.63  | 11.98 | 12.08 | 12.21 | 12.26 | 12.35 | 12.50 | 12.52 | 12.61 | 12.70 | 12.72 | 12.73 |
| 7.86  | 11.48 | 11.65 | 11.78 | 11.80 | 11.86 | 11.99 | 12.01 | 12.14 | 12.16 | 12.23 | 12.32 |
| 8.10  | 11.50 | 11.59 | 11.66 | 11.75 | 11.91 | 11.98 | 12.09 | 12.13 | 12.16 | 12.15 | 12.22 |
| 8.36  | 11.20 | 11.27 | 11.37 | 11.46 | 11.61 | 11.70 | 11.78 | 11.82 | 11.87 | 11.87 | 11.96 |
| 8.64  | 11.48 | 11.63 | 11.68 | 11.85 | 11.93 | 12.03 | 12.03 | 12.15 | 12.17 | 12.13 | 12.20 |
| 8.94  | 11.85 | 11.98 | 12.00 | 12.19 | 12.29 | 12.33 | 12.42 | 12.52 | 12.61 | 12.52 | 12.50 |
| 9.26  | 12.10 | 12.26 | 12.29 | 12.37 | 12.50 | 12.69 | 12.63 | 12.73 | 12.80 | 12.81 | 12.84 |
| 9.60  | 11.67 | 11.75 | 11.90 | 11.96 | 12.11 | 12.20 | 12.23 | 12.34 | 12.37 | 12.37 | 12.38 |
| 9.97  | 11.68 | 11.78 | 11.87 | 11.98 | 12.04 | 12.13 | 12.26 | 12.32 | 12.38 | 12.34 | 12.44 |
| 10.36 | 11.87 | 11.95 | 12.10 | 12.17 | 12.30 | 12.30 | 12.44 | 12.46 | 12.60 | 12.56 | 12.64 |
| 10.77 | 11.88 | 12.00 | 12.13 | 12.21 | 12.27 | 12.40 | 12.42 | 12.55 | 12.64 | 12.62 | 12.65 |
| 11.22 | 11.68 | 11.85 | 11.95 | 12.11 | 12.15 | 12.20 | 12.30 | 12.31 | 12.35 | 12.40 | 12.34 |
| 11.70 | 11.81 | 11.95 | 12.06 | 12.19 | 12.31 | 12.32 | 12.42 | 12.44 | 12.57 | 12.45 | 12.60 |
| 12.21 | 11.46 | 11.62 | 11.68 | 11.83 | 11.87 | 11.97 | 11.99 | 12.02 | 12.17 | 12.16 | 12.22 |
| 12.75 | 11.79 | 11.96 | 12.05 | 12.16 | 12.24 | 12.32 | 12.34 | 12.46 | 12.53 | 12.54 | 12.52 |
| 13.33 | 12.02 | 12.19 | 12.20 | 12.40 | 12.36 | 12.52 | 12.53 | 12.60 | 12.66 | 12.72 | 12.67 |
| 13.95 | 11.82 | 11.90 | 12.06 | 12.18 | 12.17 | 12.28 | 12.36 | 12.39 | 12.50 | 12.33 | 12.45 |
| 14.62 | 11.55 | 11.68 | 11.75 | 11.93 | 11.95 | 12.03 | 12.13 | 12.15 | 12.25 | 12.26 | 12.34 |
| 15.33 | 11.47 | 11.69 | 11.70 | 11.92 | 11.93 | 12.01 | 12.16 | 12.09 | 12.23 | 12.20 | 12.33 |
| 16.09 | 11.61 | 11.80 | 11.81 | 11.89 | 11.99 | 12.19 | 12.23 | 12.22 | 12.28 | 12.31 | 12.30 |
| 16.90 | 11.94 | 12.02 | 12.15 | 12.19 | 12.38 | 12.42 | 12.49 | 12.50 | 12.60 | 12.62 | 12.64 |
| 17.77 | 11.77 | 11.95 | 12.06 | 12.10 | 12.18 | 12.31 | 12.34 | 12.38 | 12.44 | 12.47 | 12.44 |
| 18.70 | 11.69 | 11.88 | 11.91 | 11.99 | 12.08 | 12.13 | 12.28 | 12.32 | 12.40 | 12.40 | 12.47 |
| 19.69 | 11.77 | 12.00 | 12.02 | 12.15 | 12.22 | 12.29 | 12.41 | 12.35 | 12.49 | 12.56 | 12.56 |
| 20.75 | 11.57 | 11.79 | 11.93 | 12.01 | 12.07 | 12.12 | 12.25 | 12.26 | 12.35 | 12.37 | 12.38 |
| 21.89 | 12.14 | 12.14 | 12.32 | 12.38 | 12.53 | 12.58 | 12.66 | 12.68 | 12.86 | 12.79 | 12.88 |
| 23.10 | 12.32 | 12.45 | 12.48 | 12.67 | 12.73 | 12.75 | 12.86 | 12.99 | 13.03 | 13.00 | 13.04 |
| 24.39 | 11.79 | 11.87 | 12.10 | 12.11 | 12.21 | 12.36 | 12.39 | 12.47 | 12.48 | 12.49 | 12.55 |
| 25.78 | 12.02 | 12.25 | 12.37 | 12.43 | 12.44 | 12.54 | 12.59 | 12.71 | 12.77 | 12.69 | 12.74 |
| 27.26 | 11.95 | 12.09 | 12.15 | 12.31 | 12.36 | 12.47 | 12.53 | 12.59 | 12.70 | 12.60 | 12.73 |
| 28.84 | 11.99 | 12.12 | 12.22 | 12.26 | 12.33 | 12.44 | 12.55 | 12.53 | 12.60 | 12.59 | 12.68 |
| 30.53 | 12.11 | 12.28 | 12.31 | 12.39 | 12.47 | 12.65 | 12.71 | 12.69 | 12.80 | 12.80 | 12.73 |
| 32.34 | 11.74 | 11.92 | 12.00 | 12.10 | 12.10 | 12.34 | 12.35 | 12.42 | 12.44 | 12.50 | 12.51 |
| 34.27 | 12.15 | 12.17 | 12.36 | 12.47 | 12.50 | 12.63 | 12.62 | 12.75 | 12.73 | 12.84 | 12.89 |
| 36.34 | 11.76 | 11.97 | 11.94 | 12.20 | 12.24 | 12.39 | 12.45 | 12.43 | 12.52 | 12.56 | 12.51 |
| 38.55 | 12.10 | 12.22 | 12.35 | 12.43 | 12.52 | 12.57 | 12.66 | 12.71 | 12.72 | 12.69 | 12.83 |
| 40.91 | 11.96 | 12.09 | 12.18 | 12.24 | 12.41 | 12.46 | 12.56 | 12.51 | 12.68 | 12.61 | 12.76 |

|         |       |       |       |       |       |       |       |       |       |       |       |
|---------|-------|-------|-------|-------|-------|-------|-------|-------|-------|-------|-------|
| 43.43   | 11.76 | 11.83 | 11.89 | 11.96 | 12.10 | 12.19 | 12.23 | 12.28 | 12.37 | 12.36 | 12.44 |
| 46.13   | 11.81 | 11.98 | 11.97 | 12.19 | 12.21 | 12.28 | 12.28 | 12.34 | 12.48 | 12.49 | 12.47 |
| 49.01   | 12.08 | 12.31 | 12.40 | 12.49 | 12.62 | 12.66 | 12.72 | 12.82 | 12.82 | 12.86 | 12.96 |
| 52.09   | 11.82 | 12.00 | 12.18 | 12.30 | 12.39 | 12.42 | 12.48 | 12.57 | 12.62 | 12.67 | 12.66 |
| 55.39   | 11.85 | 11.96 | 12.13 | 12.14 | 12.17 | 12.38 | 12.50 | 12.48 | 12.55 | 12.51 | 12.51 |
| 58.91   | 11.75 | 11.94 | 12.03 | 12.15 | 12.24 | 12.27 | 12.43 | 12.42 | 12.48 | 12.34 | 12.50 |
| 62.68   | 11.86 | 12.01 | 12.12 | 12.27 | 12.38 | 12.44 | 12.51 | 12.61 | 12.60 | 12.60 | 12.65 |
| 66.70   | 11.84 | 12.06 | 12.09 | 12.29 | 12.36 | 12.45 | 12.51 | 12.51 | 12.60 | 12.60 | 12.70 |
| 71.00   | 11.95 | 12.15 | 12.08 | 12.37 | 12.38 | 12.52 | 12.60 | 12.64 | 12.65 | 12.71 | 12.77 |
| 75.60   | 11.75 | 11.95 | 12.02 | 12.23 | 12.20 | 12.39 | 12.43 | 12.41 | 12.46 | 12.54 | 12.52 |
| 80.51   | 11.84 | 11.98 | 12.11 | 12.30 | 12.39 | 12.46 | 12.51 | 12.62 | 12.67 | 12.65 | 12.69 |
| 85.77   | 12.14 | 12.32 | 12.47 | 12.58 | 12.64 | 12.84 | 12.87 | 12.92 | 13.00 | 12.95 | 13.03 |
| 91.38   | 12.03 | 12.22 | 12.30 | 12.43 | 12.57 | 12.72 | 12.69 | 12.74 | 12.86 | 12.82 | 12.93 |
| 97.39   | 11.98 | 12.10 | 12.25 | 12.37 | 12.41 | 12.52 | 12.68 | 12.73 | 12.76 | 12.82 | 12.85 |
| 103.80  | 12.26 | 12.45 | 12.59 | 12.72 | 12.70 | 12.91 | 13.06 | 13.05 | 13.12 | 13.07 | 13.22 |
| 110.66  | 11.86 | 12.09 | 12.19 | 12.32 | 12.43 | 12.46 | 12.60 | 12.62 | 12.80 | 12.72 | 12.78 |
| 117.99  | 11.94 | 12.15 | 12.21 | 12.34 | 12.51 | 12.58 | 12.59 | 12.73 | 12.77 | 12.83 | 12.85 |
| 125.83  | 12.18 | 12.37 | 12.46 | 12.59 | 12.71 | 12.86 | 12.81 | 12.83 | 13.05 | 13.04 | 13.00 |
| 134.21  | 12.05 | 12.13 | 12.33 | 12.47 | 12.57 | 12.63 | 12.71 | 12.71 | 12.92 | 12.85 | 12.92 |
| 143.17  | 11.94 | 12.17 | 12.33 | 12.47 | 12.60 | 12.66 | 12.72 | 12.79 | 12.88 | 12.93 | 12.95 |
| 152.74  | 12.02 | 12.19 | 12.36 | 12.51 | 12.57 | 12.70 | 12.74 | 12.83 | 12.90 | 12.97 | 12.91 |
| 162.97  | 12.22 | 12.46 | 12.49 | 12.63 | 12.73 | 12.83 | 12.86 | 13.08 | 13.09 | 13.15 | 13.14 |
| 173.91  | 12.07 | 12.25 | 12.40 | 12.46 | 12.53 | 12.71 | 12.75 | 12.83 | 12.94 | 12.96 | 13.01 |
| 185.60  | 12.24 | 12.42 | 12.58 | 12.69 | 12.82 | 12.84 | 13.00 | 13.07 | 13.16 | 13.17 | 13.20 |
| 198.10  | 12.19 | 12.34 | 12.48 | 12.58 | 12.68 | 12.81 | 12.83 | 12.94 | 13.03 | 13.04 | 13.14 |
| 211.46  | 12.25 | 12.39 | 12.57 | 12.70 | 12.76 | 12.89 | 13.04 | 12.98 | 13.16 | 13.10 | 13.16 |
| 225.75  | 12.25 | 12.47 | 12.56 | 12.70 | 12.85 | 12.97 | 13.05 | 13.07 | 13.10 | 13.10 | 13.30 |
| 241.01  | 12.09 | 12.30 | 12.42 | 12.59 | 12.61 | 12.82 | 12.85 | 12.82 | 12.97 | 13.06 | 13.13 |
| 257.33  | 12.29 | 12.44 | 12.53 | 12.66 | 12.81 | 12.94 | 13.02 | 13.12 | 13.12 | 13.18 | 13.19 |
| 274.77  | 12.49 | 12.55 | 12.65 | 12.81 | 13.05 | 13.04 | 13.17 | 13.14 | 13.32 | 13.26 | 13.36 |
| 293.42  | 12.42 | 12.60 | 12.68 | 12.80 | 12.95 | 13.04 | 13.04 | 13.18 | 13.24 | 13.29 | 13.36 |
| 313.35  | 12.25 | 12.45 | 12.49 | 12.69 | 12.88 | 12.97 | 12.89 | 13.14 | 13.13 | 13.08 | 13.21 |
| 334.66  | 12.46 | 12.65 | 12.73 | 12.97 | 13.02 | 13.09 | 13.24 | 13.36 | 13.35 | 13.36 | 13.45 |
| 357.43  | 12.37 | 12.48 | 12.70 | 12.89 | 12.95 | 13.05 | 13.13 | 13.16 | 13.30 | 13.34 | 13.37 |
| 381.78  | 12.15 | 12.19 | 12.39 | 12.51 | 12.67 | 12.73 | 12.85 | 12.88 | 13.03 | 12.99 | 13.02 |
| 407.80  | 12.23 | 12.34 | 12.48 | 12.64 | 12.75 | 12.91 | 12.94 | 13.01 | 13.12 | 13.06 | 13.02 |
| 435.62  | 12.49 | 12.68 | 12.84 | 12.82 | 13.04 | 13.18 | 13.38 | 13.32 | 13.41 | 13.41 | 13.44 |
| 465.35  | 12.28 | 12.37 | 12.58 | 12.71 | 12.73 | 12.92 | 12.95 | 13.04 | 13.14 | 13.18 | 13.31 |
| 497.14  | 12.28 | 12.45 | 12.48 | 12.64 | 12.79 | 12.94 | 13.06 | 13.00 | 13.20 | 13.11 | 13.33 |
| 531.11  | 12.10 | 12.20 | 12.40 | 12.52 | 12.66 | 12.70 | 12.90 | 12.83 | 12.90 | 13.01 | 13.04 |
| 567.43  | 12.38 | 12.60 | 12.68 | 12.88 | 12.90 | 13.07 | 13.17 | 13.20 | 13.36 | 13.32 | 13.33 |
| 606.26  | 12.36 | 12.49 | 12.66 | 12.77 | 12.91 | 12.98 | 13.10 | 13.16 | 13.19 | 13.27 | 13.27 |
| 647.76  | 12.21 | 12.46 | 12.58 | 12.66 | 12.77 | 12.97 | 12.91 | 13.03 | 13.23 | 13.16 | 13.24 |
| 692.12  | 11.88 | 12.07 | 12.11 | 12.30 | 12.43 | 12.53 | 12.73 | 12.69 | 12.84 | 12.86 | 12.83 |
| 739.53  | 12.22 | 12.49 | 12.61 | 12.75 | 12.80 | 12.94 | 12.95 | 13.00 | 13.15 | 13.17 | 13.26 |
| 790.22  | 12.11 | 12.30 | 12.41 | 12.50 | 12.64 | 12.85 | 12.93 | 12.93 | 13.05 | 13.17 | 13.13 |
| 844.40  | 12.22 | 12.38 | 12.48 | 12.67 | 12.70 | 12.81 | 12.94 | 13.03 | 13.09 | 13.08 | 13.18 |
| 902.32  | 12.19 | 12.50 | 12.62 | 12.69 | 12.77 | 12.89 | 13.05 | 13.06 | 13.09 | 13.20 | 13.29 |
| 964.23  | 11.98 | 12.18 | 12.27 | 12.38 | 12.50 | 12.63 | 12.68 | 12.88 | 12.94 | 12.91 | 13.00 |
| 1030.41 | 12.12 | 12.25 | 12.35 | 12.47 | 12.65 | 12.80 | 12.84 | 12.97 | 12.96 | 13.02 | 13.10 |

|         |       |       |       |       |       |       |       |       |       |       |       |
|---------|-------|-------|-------|-------|-------|-------|-------|-------|-------|-------|-------|
| 1101.15 | 12.11 | 12.29 | 12.39 | 12.48 | 12.62 | 12.83 | 12.80 | 12.92 | 12.95 | 13.01 | 13.02 |
| 1176.77 | 12.19 | 12.28 | 12.42 | 12.48 | 12.51 | 12.66 | 12.89 | 12.92 | 13.05 | 12.98 | 13.07 |
| 1257.60 | 12.13 | 12.25 | 12.49 | 12.65 | 12.61 | 12.75 | 12.80 | 12.89 | 13.04 | 12.98 | 13.06 |
| 1344.00 | 12.08 | 12.12 | 12.37 | 12.41 | 12.58 | 12.66 | 12.75 | 12.88 | 12.87 | 12.92 | 12.98 |
| 1436.36 | 11.97 | 12.04 | 12.16 | 12.36 | 12.53 | 12.52 | 12.63 | 12.67 | 12.70 | 12.73 | 12.85 |
| 1535.09 | 12.15 | 12.33 | 12.49 | 12.43 | 12.61 | 12.71 | 12.85 | 12.94 | 12.97 | 12.97 | 13.00 |
| 1640.63 | 11.95 | 12.10 | 12.22 | 12.34 | 12.54 | 12.58 | 12.71 | 12.80 | 12.94 | 12.86 | 12.90 |
| 1753.44 | 11.86 | 12.12 | 12.20 | 12.32 | 12.45 | 12.58 | 12.65 | 12.68 | 12.80 | 12.81 | 12.86 |
| 1874.02 | 11.88 | 12.07 | 12.18 | 12.30 | 12.34 | 12.55 | 12.63 | 12.67 | 12.77 | 12.74 | 12.85 |
| 2002.92 | 11.89 | 12.05 | 12.14 | 12.35 | 12.34 | 12.49 | 12.59 | 12.64 | 12.71 | 12.66 | 12.76 |
| 2140.71 | 11.59 | 11.71 | 11.87 | 12.16 | 12.22 | 12.31 | 12.43 | 12.38 | 12.52 | 12.47 | 12.60 |
| 2288.00 | 11.77 | 11.87 | 11.98 | 12.10 | 12.19 | 12.36 | 12.35 | 12.43 | 12.58 | 12.55 | 12.60 |
| 2445.44 | 11.64 | 11.79 | 11.91 | 12.06 | 12.21 | 12.26 | 12.43 | 12.40 | 12.47 | 12.43 | 12.51 |
| 2613.73 | 11.83 | 11.96 | 12.07 | 12.18 | 12.23 | 12.42 | 12.50 | 12.52 | 12.56 | 12.52 | 12.65 |
| 2793.63 | 11.54 | 11.68 | 11.79 | 11.86 | 11.99 | 12.03 | 12.19 | 12.20 | 12.23 | 12.23 | 12.32 |
| 2985.93 | 11.31 | 11.49 | 11.55 | 11.69 | 11.81 | 11.87 | 11.92 | 12.03 | 12.11 | 12.12 | 12.21 |
| 3191.49 | 11.36 | 11.40 | 11.56 | 11.65 | 11.78 | 11.96 | 11.90 | 11.97 | 12.02 | 12.12 | 12.10 |
| 3411.21 | 11.26 | 11.44 | 11.50 | 11.61 | 11.72 | 11.71 | 11.80 | 11.84 | 11.87 | 11.92 | 11.95 |
| 3646.09 | 11.20 | 11.33 | 11.38 | 11.51 | 11.68 | 11.70 | 11.75 | 11.89 | 11.86 | 11.86 | 11.94 |
| 3897.16 | 11.09 | 11.22 | 11.29 | 11.37 | 11.36 | 11.60 | 11.67 | 11.69 | 11.76 | 11.65 | 11.79 |

| Wavelength (nm) \ Time (ps) | 569.06 | 570.48 | 571.91 | 573.33 | 574.75 | 576.18 | 577.60 | 579.03 | 580.45 | 581.87 | 583.30 |
|-----------------------------|--------|--------|--------|--------|--------|--------|--------|--------|--------|--------|--------|
| -2.74                       | 0.00   | 0.03   | -0.05  | 0.08   | 0.04   | -0.04  | -0.02  | -0.05  | -0.04  | 0.00   | -0.15  |
| -2.24                       | -0.08  | -0.02  | -0.02  | -0.05  | -0.04  | -0.06  | -0.10  | -0.11  | -0.03  | -0.06  | -0.12  |
| -1.74                       | -0.03  | -0.06  | 0.01   | -0.02  | -0.04  | 0.00   | -0.09  | -0.10  | 0.03   | -0.01  | 0.01   |
| -1.24                       | -0.01  | -0.04  | -0.10  | -0.09  | -0.06  | 0.06   | 0.04   | 0.12   | -0.06  | -0.05  | 0.03   |
| -0.74                       | 0.10   | 0.03   | 0.03   | 0.01   | 0.07   | 0.00   | 0.08   | -0.03  | 0.02   | 0.03   | 0.06   |
| -0.24                       | 0.03   | 0.00   | 0.05   | 0.02   | -0.03  | -0.07  | 0.03   | 0.05   | -0.03  | 0.04   | 0.01   |
| -0.14                       | -0.04  | -0.04  | 0.02   | 0.02   | -0.02  | 0.07   | 0.04   | 0.05   | 0.05   | -0.01  | 0.12   |
| -0.04                       | 0.02   | 0.11   | 0.06   | 0.03   | 0.07   | 0.04   | 0.01   | 0.06   | 0.06   | 0.07   | 0.03   |
| 0.06                        | 0.01   | -0.07  | -0.02  | 0.01   | -0.02  | -0.05  | 0.00   | 0.05   | -0.01  | 0.01   | 0.00   |
| 0.16                        | 0.03   | -0.06  | 0.01   | -0.02  | -0.03  | -0.11  | -0.02  | -0.06  | 0.01   | -0.05  | -0.02  |
| 0.26                        | -0.09  | -0.05  | -0.07  | -0.01  | 0.00   | -0.10  | -0.07  | -0.04  | -0.08  | -0.02  | -0.06  |
| 0.31                        | -0.02  | -0.03  | -0.02  | 0.06   | 0.03   | -0.04  | 0.00   | -0.05  | -0.08  | 0.00   | 0.10   |
| 0.36                        | 0.00   | 0.04   | -0.05  | 0.07   | 0.06   | -0.02  | 0.00   | 0.06   | 0.00   | 0.02   | 0.04   |
| 0.41                        | 0.03   | 0.00   | 0.02   | 0.02   | 0.14   | 0.07   | -0.02  | 0.01   | -0.02  | -0.01  | 0.03   |
| 0.46                        | -0.10  | 0.03   | -0.09  | 0.07   | 0.06   | -0.06  | -0.06  | 0.05   | 0.00   | 0.06   | -0.02  |
| 0.51                        | -0.05  | 0.00   | -0.01  | 0.11   | 0.11   | -0.05  | 0.02   | 0.04   | 0.03   | 0.00   | 0.02   |
| 0.56                        | -0.01  | 0.02   | 0.01   | 0.01   | 0.03   | -0.05  | 0.07   | -0.01  | 0.07   | -0.07  | -0.03  |
| 0.61                        | -0.07  | -0.06  | -0.01  | 0.03   | 0.08   | -0.07  | -0.04  | 0.01   | -0.12  | -0.01  | 0.02   |
| 0.66                        | 0.01   | -0.02  | 0.05   | 0.05   | 0.01   | -0.05  | -0.07  | 0.01   | 0.05   | -0.02  | 0.04   |
| 0.71                        | -0.03  | 0.00   | 0.02   | 0.06   | 0.07   | 0.00   | -0.05  | 0.01   | 0.02   | -0.04  | 0.03   |
| 0.76                        | -0.19  | -0.04  | -0.02  | -0.03  | -0.01  | -0.07  | -0.09  | -0.09  | -0.05  | -0.02  | -0.04  |
| 0.81                        | -0.01  | -0.01  | -0.01  | -0.01  | 0.00   | -0.02  | -0.06  | -0.04  | 0.05   | 0.05   | 0.01   |
| 0.86                        | 0.03   | -0.06  | -0.03  | 0.00   | 0.02   | -0.01  | 0.06   | 0.00   | 0.00   | 0.06   | 0.13   |
| 0.91                        | -0.01  | 0.06   | 0.01   | 0.08   | 0.03   | -0.02  | 0.00   | 0.04   | 0.04   | -0.12  | 0.04   |
| 0.96                        | -0.04  | -0.07  | -0.07  | 0.04   | 0.02   | -0.08  | -0.01  | 0.02   | 0.07   | 0.00   | -0.05  |
| 1.01                        | -0.12  | -0.13  | -0.07  | -0.06  | -0.05  | -0.10  | -0.09  | -0.05  | -0.09  | -0.07  | -0.10  |



|      |        |        |        |        |        |        |        |        |        |        |        |
|------|--------|--------|--------|--------|--------|--------|--------|--------|--------|--------|--------|
| 1.06 | 0.02   | 0.04   | 0.10   | 0.02   | -0.06  | -0.03  | -0.02  | 0.05   | 0.05   | 0.05   | 0.11   |
| 1.11 | -0.02  | -0.01  | 0.01   | -0.01  | 0.02   | -0.03  | 0.04   | 0.01   | -0.01  | -0.02  | -0.02  |
| 1.16 | -0.10  | -0.06  | 0.13   | 0.10   | 0.00   | -0.07  | -0.04  | 0.07   | 0.04   | -0.13  | 0.01   |
| 1.21 | 0.01   | -0.14  | -0.09  | -0.01  | -0.03  | 0.21   | 0.06   | -0.10  | -0.04  | 0.04   | 0.07   |
| 1.26 | -2.00  | -0.96  | -0.16  | 0.56   | 0.90   | 0.71   | 0.37   | 0.03   | -0.28  | -0.46  | -0.46  |
| 1.31 | -73.74 | -75.39 | -74.89 | -72.12 | -67.09 | -60.33 | -52.19 | -43.44 | -34.92 | -27.01 | -20.23 |
| 1.36 | 205.48 | 191.08 | 177.96 | 165.07 | 153.41 | 142.65 | 133.44 | 125.43 | 117.91 | 110.51 | 103.24 |
| 1.41 | -88.60 | -82.40 | -75.09 | -66.09 | -55.80 | -44.03 | -31.05 | -16.27 | -0.26  | 16.72  | 34.38  |
| 1.46 | 21.31  | 20.66  | 19.87  | 18.98  | 17.91  | 16.53  | 15.30  | 14.18  | 13.21  | 12.19  | 11.33  |
| 1.51 | 13.82  | 13.69  | 13.67  | 13.85  | 13.98  | 14.17  | 14.36  | 14.83  | 15.12  | 15.50  | 15.94  |
| 1.56 | 13.76  | 14.03  | 14.40  | 14.59  | 14.85  | 14.96  | 15.15  | 15.46  | 15.69  | 15.89  | 16.20  |
| 1.61 | 14.38  | 14.50  | 14.53  | 14.63  | 14.66  | 14.63  | 14.53  | 14.38  | 14.23  | 14.18  | 13.97  |
| 1.66 | 13.80  | 13.89  | 13.79  | 13.98  | 13.91  | 13.99  | 14.00  | 14.10  | 14.28  | 14.21  | 14.36  |
| 1.71 | 12.71  | 12.73  | 12.82  | 12.79  | 12.84  | 12.75  | 12.73  | 12.71  | 12.74  | 12.75  | 12.87  |
| 1.76 | 13.10  | 13.21  | 13.26  | 13.34  | 13.44  | 13.57  | 13.59  | 13.72  | 13.78  | 13.81  | 13.88  |
| 1.81 | 12.53  | 12.59  | 12.72  | 13.00  | 13.06  | 13.06  | 13.23  | 13.35  | 13.46  | 13.57  | 13.68  |
| 1.86 | 12.67  | 12.71  | 12.69  | 12.83  | 12.74  | 12.62  | 12.48  | 12.46  | 12.51  | 12.56  | 12.61  |
| 1.91 | 12.41  | 12.44  | 12.50  | 12.60  | 12.66  | 12.63  | 12.77  | 12.77  | 12.79  | 12.82  | 12.78  |
| 1.96 | 11.98  | 12.12  | 12.10  | 12.33  | 12.40  | 12.41  | 12.43  | 12.62  | 12.73  | 12.82  | 12.97  |
| 2.01 | 12.42  | 12.50  | 12.53  | 12.74  | 12.89  | 12.83  | 12.90  | 12.88  | 12.83  | 12.83  | 12.79  |
| 2.06 | 12.59  | 12.57  | 12.63  | 12.75  | 12.82  | 12.79  | 12.87  | 12.95  | 12.99  | 13.03  | 13.06  |
| 2.11 | 12.08  | 12.13  | 12.18  | 12.11  | 12.18  | 12.22  | 12.24  | 12.21  | 12.32  | 12.31  | 12.35  |
| 2.16 | 12.31  | 12.31  | 12.33  | 12.48  | 12.43  | 12.52  | 12.63  | 12.64  | 12.75  | 12.62  | 12.68  |
| 2.21 | 12.57  | 12.63  | 12.69  | 12.83  | 12.94  | 12.88  | 13.00  | 13.03  | 13.18  | 13.22  | 13.19  |
| 2.26 | 12.49  | 12.54  | 12.60  | 12.61  | 12.58  | 12.55  | 12.52  | 12.53  | 12.57  | 12.62  | 12.57  |
| 2.31 | 12.15  | 12.19  | 12.15  | 12.25  | 12.39  | 12.30  | 12.34  | 12.41  | 12.44  | 12.45  | 12.45  |
| 2.36 | 11.89  | 11.95  | 12.05  | 12.25  | 12.21  | 12.23  | 12.25  | 12.39  | 12.45  | 12.52  | 12.56  |
| 2.41 | 12.22  | 12.25  | 12.26  | 12.45  | 12.41  | 12.35  | 12.41  | 12.36  | 12.32  | 12.34  | 12.35  |
| 2.46 | 11.92  | 12.00  | 12.10  | 12.14  | 12.20  | 12.15  | 12.10  | 12.22  | 12.24  | 12.22  | 12.38  |
| 2.51 | 12.21  | 12.25  | 12.35  | 12.47  | 12.44  | 12.51  | 12.47  | 12.51  | 12.55  | 12.52  | 12.64  |
| 2.56 | 12.31  | 12.44  | 12.39  | 12.54  | 12.58  | 12.49  | 12.53  | 12.61  | 12.67  | 12.58  | 12.62  |
| 2.61 | 11.86  | 11.94  | 11.97  | 12.14  | 12.12  | 12.11  | 12.16  | 12.29  | 12.28  | 12.31  | 12.30  |
| 2.66 | 12.18  | 12.20  | 12.26  | 12.26  | 12.35  | 12.24  | 12.27  | 12.36  | 12.26  | 12.25  | 12.36  |
| 2.71 | 11.96  | 12.05  | 11.94  | 12.14  | 12.23  | 12.12  | 12.23  | 12.21  | 12.26  | 12.25  | 12.19  |
| 2.76 | 12.22  | 12.35  | 12.40  | 12.44  | 12.38  | 12.38  | 12.50  | 12.55  | 12.50  | 12.52  | 12.61  |
| 2.81 | 11.82  | 11.95  | 11.95  | 12.05  | 11.95  | 11.94  | 12.07  | 12.01  | 12.06  | 12.01  | 12.08  |
| 2.86 | 11.76  | 11.82  | 11.84  | 11.85  | 12.04  | 12.02  | 12.04  | 12.10  | 12.17  | 12.09  | 12.20  |
| 2.91 | 12.03  | 12.03  | 12.15  | 12.23  | 12.21  | 12.13  | 12.27  | 12.32  | 12.26  | 12.36  | 12.33  |
| 2.96 | 12.26  | 12.36  | 12.35  | 12.49  | 12.54  | 12.49  | 12.55  | 12.53  | 12.47  | 12.41  | 12.50  |
| 3.01 | 12.22  | 12.23  | 12.30  | 12.47  | 12.47  | 12.35  | 12.45  | 12.47  | 12.44  | 12.49  | 12.52  |
| 3.06 | 11.74  | 11.73  | 11.77  | 11.83  | 11.84  | 11.82  | 11.80  | 11.85  | 11.85  | 11.86  | 11.82  |
| 3.11 | 12.11  | 12.18  | 12.05  | 12.15  | 12.30  | 12.27  | 12.22  | 12.27  | 12.29  | 12.26  | 12.33  |
| 3.16 | 12.07  | 12.04  | 12.07  | 12.10  | 12.13  | 12.18  | 12.15  | 12.28  | 12.22  | 12.20  | 12.32  |
| 3.21 | 11.82  | 11.92  | 11.97  | 12.05  | 11.99  | 11.97  | 11.93  | 12.09  | 12.08  | 12.02  | 12.09  |
| 3.26 | 11.95  | 12.02  | 12.00  | 12.16  | 12.16  | 12.12  | 12.17  | 12.22  | 12.22  | 12.22  | 12.25  |
| 3.31 | 11.94  | 12.03  | 11.94  | 12.13  | 12.10  | 12.01  | 12.13  | 12.16  | 12.07  | 12.17  | 12.29  |
| 3.36 | 12.26  | 12.17  | 12.29  | 12.35  | 12.30  | 12.39  | 12.25  | 12.33  | 12.31  | 12.34  | 12.31  |
| 3.41 | 12.21  | 12.20  | 12.28  | 12.35  | 12.37  | 12.35  | 12.39  | 12.43  | 12.45  | 12.42  | 12.43  |
| 3.46 | 11.92  | 11.97  | 12.08  | 12.04  | 12.06  | 11.99  | 12.14  | 12.11  | 12.09  | 12.13  | 12.16  |
| 3.51 | 12.17  | 12.26  | 12.29  | 12.30  | 12.31  | 12.31  | 12.38  | 12.38  | 12.37  | 12.37  | 12.40  |

|      |       |       |       |       |       |       |       |       |       |       |       |
|------|-------|-------|-------|-------|-------|-------|-------|-------|-------|-------|-------|
| 3.56 | 11.86 | 11.94 | 12.04 | 12.09 | 12.10 | 12.04 | 11.97 | 12.06 | 12.13 | 12.10 | 12.10 |
| 3.61 | 11.70 | 11.76 | 11.75 | 11.83 | 11.72 | 11.78 | 11.80 | 11.82 | 11.86 | 11.86 | 11.82 |
| 3.66 | 11.66 | 11.76 | 11.76 | 11.87 | 11.91 | 11.86 | 11.91 | 11.82 | 11.99 | 11.96 | 11.93 |
| 3.71 | 12.15 | 12.22 | 12.18 | 12.37 | 12.33 | 12.26 | 12.31 | 12.31 | 12.36 | 12.34 | 12.38 |
| 3.76 | 12.43 | 12.48 | 12.46 | 12.54 | 12.58 | 12.65 | 12.60 | 12.60 | 12.71 | 12.60 | 12.65 |
| 3.81 | 11.72 | 11.76 | 11.87 | 11.99 | 11.96 | 11.96 | 11.97 | 11.98 | 12.06 | 11.96 | 12.04 |
| 3.86 | 11.54 | 11.68 | 11.71 | 11.71 | 11.81 | 11.72 | 11.74 | 11.81 | 11.88 | 11.81 | 11.86 |
| 3.91 | 12.36 | 12.37 | 12.34 | 12.36 | 12.46 | 12.41 | 12.42 | 12.42 | 12.41 | 12.42 | 12.49 |
| 3.96 | 12.06 | 12.15 | 12.12 | 12.30 | 12.30 | 12.14 | 12.24 | 12.28 | 12.25 | 12.24 | 12.29 |
| 4.01 | 12.21 | 12.27 | 12.26 | 12.34 | 12.39 | 12.30 | 12.42 | 12.32 | 12.27 | 12.32 | 12.37 |
| 4.06 | 12.22 | 12.28 | 12.37 | 12.40 | 12.44 | 12.43 | 12.38 | 12.53 | 12.47 | 12.48 | 12.50 |
| 4.11 | 12.00 | 12.09 | 12.16 | 12.19 | 12.20 | 12.22 | 12.15 | 12.34 | 12.25 | 12.23 | 12.29 |
| 4.16 | 12.22 | 12.19 | 12.24 | 12.33 | 12.42 | 12.29 | 12.30 | 12.35 | 12.39 | 12.36 | 12.41 |
| 4.21 | 12.64 | 12.63 | 12.67 | 12.66 | 12.72 | 12.70 | 12.71 | 12.76 | 12.76 | 12.70 | 12.78 |
| 4.26 | 12.12 | 12.11 | 12.08 | 12.18 | 12.26 | 12.19 | 12.16 | 12.27 | 12.22 | 12.21 | 12.23 |
| 4.31 | 11.98 | 12.02 | 12.10 | 12.26 | 12.08 | 12.16 | 12.18 | 12.10 | 12.22 | 12.22 | 12.17 |
| 4.36 | 12.08 | 12.09 | 12.04 | 12.19 | 12.18 | 12.28 | 12.24 | 12.17 | 12.27 | 12.25 | 12.22 |
| 4.41 | 11.85 | 11.85 | 11.96 | 12.01 | 12.03 | 12.04 | 12.01 | 12.21 | 12.06 | 12.05 | 12.00 |
| 4.46 | 12.39 | 12.38 | 12.45 | 12.58 | 12.51 | 12.52 | 12.52 | 12.49 | 12.52 | 12.41 | 12.42 |
| 4.51 | 12.16 | 12.21 | 12.29 | 12.28 | 12.34 | 12.24 | 12.33 | 12.36 | 12.32 | 12.36 | 12.34 |
| 4.56 | 11.89 | 11.99 | 12.05 | 12.11 | 12.13 | 12.04 | 12.03 | 12.09 | 12.02 | 12.09 | 12.12 |
| 4.61 | 11.78 | 11.86 | 11.91 | 12.00 | 11.93 | 12.05 | 11.96 | 12.03 | 12.00 | 11.99 | 12.05 |
| 4.66 | 12.23 | 12.18 | 12.21 | 12.40 | 12.40 | 12.32 | 12.37 | 12.35 | 12.41 | 12.38 | 12.42 |
| 4.71 | 12.20 | 12.18 | 12.27 | 12.28 | 12.39 | 12.20 | 12.25 | 12.31 | 12.33 | 12.23 | 12.23 |
| 4.76 | 12.51 | 12.56 | 12.57 | 12.65 | 12.67 | 12.64 | 12.61 | 12.63 | 12.64 | 12.70 | 12.76 |
| 4.81 | 12.04 | 12.00 | 12.02 | 12.23 | 12.08 | 12.19 | 12.19 | 12.14 | 12.09 | 12.12 | 12.20 |
| 4.86 | 11.93 | 11.94 | 12.01 | 12.07 | 12.06 | 11.98 | 12.02 | 12.11 | 12.07 | 12.06 | 12.08 |
| 4.91 | 12.32 | 12.35 | 12.41 | 12.58 | 12.52 | 12.54 | 12.49 | 12.63 | 12.56 | 12.60 | 12.51 |
| 4.96 | 12.02 | 12.09 | 12.12 | 12.21 | 12.19 | 12.10 | 12.14 | 12.25 | 12.23 | 12.12 | 12.22 |
| 5.01 | 12.16 | 12.16 | 12.16 | 12.25 | 12.27 | 12.15 | 12.20 | 12.21 | 12.17 | 12.20 | 12.22 |
| 5.06 | 12.22 | 12.24 | 12.28 | 12.29 | 12.35 | 12.31 | 12.37 | 12.35 | 12.30 | 12.36 | 12.36 |
| 5.11 | 11.98 | 11.99 | 12.03 | 12.13 | 12.20 | 12.09 | 12.21 | 12.16 | 12.16 | 12.12 | 12.08 |
| 5.16 | 12.00 | 11.99 | 11.95 | 12.09 | 12.08 | 12.00 | 12.07 | 12.07 | 12.12 | 12.10 | 12.09 |
| 5.21 | 12.03 | 12.09 | 12.16 | 12.23 | 12.20 | 12.21 | 12.14 | 12.28 | 12.22 | 12.22 | 12.22 |
| 5.26 | 12.34 | 12.43 | 12.48 | 12.57 | 12.54 | 12.47 | 12.51 | 12.50 | 12.47 | 12.52 | 12.61 |
| 5.31 | 12.27 | 12.26 | 12.30 | 12.32 | 12.31 | 12.33 | 12.38 | 12.37 | 12.47 | 12.34 | 12.30 |
| 5.38 | 12.20 | 12.05 | 12.19 | 12.26 | 12.32 | 12.26 | 12.30 | 12.33 | 12.28 | 12.25 | 12.31 |
| 5.45 | 12.47 | 12.54 | 12.51 | 12.60 | 12.67 | 12.51 | 12.63 | 12.58 | 12.68 | 12.66 | 12.69 |
| 5.53 | 12.25 | 12.09 | 12.19 | 12.35 | 12.32 | 12.29 | 12.34 | 12.22 | 12.39 | 12.36 | 12.40 |
| 5.61 | 12.56 | 12.58 | 12.54 | 12.66 | 12.58 | 12.61 | 12.65 | 12.60 | 12.68 | 12.59 | 12.56 |
| 5.70 | 12.37 | 12.40 | 12.37 | 12.45 | 12.42 | 12.44 | 12.40 | 12.38 | 12.39 | 12.41 | 12.46 |
| 5.80 | 12.51 | 12.49 | 12.57 | 12.61 | 12.57 | 12.52 | 12.49 | 12.62 | 12.59 | 12.56 | 12.62 |
| 5.90 | 11.94 | 11.91 | 12.02 | 12.05 | 12.04 | 12.02 | 12.07 | 12.08 | 12.04 | 12.12 | 12.14 |
| 6.01 | 12.56 | 12.68 | 12.68 | 12.71 | 12.72 | 12.76 | 12.63 | 12.77 | 12.72 | 12.79 | 12.75 |
| 6.13 | 12.16 | 12.22 | 12.28 | 12.30 | 12.41 | 12.32 | 12.28 | 12.37 | 12.33 | 12.41 | 12.40 |
| 6.25 | 11.99 | 11.95 | 12.02 | 12.13 | 12.15 | 12.02 | 12.06 | 12.14 | 12.10 | 12.10 | 12.20 |
| 6.39 | 12.15 | 12.06 | 12.11 | 12.18 | 12.24 | 12.19 | 12.20 | 12.21 | 12.24 | 12.23 | 12.21 |
| 6.53 | 12.14 | 12.21 | 12.18 | 12.23 | 12.31 | 12.16 | 12.19 | 12.32 | 12.27 | 12.21 | 12.31 |
| 6.69 | 12.37 | 12.34 | 12.39 | 12.48 | 12.40 | 12.34 | 12.37 | 12.47 | 12.50 | 12.41 | 12.39 |
| 6.85 | 12.11 | 12.12 | 12.23 | 12.23 | 12.42 | 12.30 | 12.23 | 12.30 | 12.24 | 12.24 | 12.28 |

|       |       |       |       |       |       |       |       |       |       |       |       |
|-------|-------|-------|-------|-------|-------|-------|-------|-------|-------|-------|-------|
| 7.03  | 12.30 | 12.31 | 12.31 | 12.40 | 12.44 | 12.34 | 12.44 | 12.39 | 12.33 | 12.36 | 12.36 |
| 7.21  | 12.34 | 12.28 | 12.38 | 12.41 | 12.45 | 12.38 | 12.40 | 12.45 | 12.38 | 12.40 | 12.38 |
| 7.41  | 12.37 | 12.43 | 12.44 | 12.38 | 12.44 | 12.47 | 12.47 | 12.48 | 12.42 | 12.39 | 12.47 |
| 7.63  | 12.66 | 12.76 | 12.81 | 12.85 | 12.85 | 12.81 | 12.82 | 12.89 | 12.90 | 12.81 | 12.80 |
| 7.86  | 12.25 | 12.27 | 12.31 | 12.36 | 12.33 | 12.35 | 12.36 | 12.37 | 12.35 | 12.38 | 12.32 |
| 8.10  | 12.34 | 12.35 | 12.37 | 12.40 | 12.40 | 12.25 | 12.34 | 12.34 | 12.33 | 12.37 | 12.34 |
| 8.36  | 11.92 | 12.02 | 11.93 | 12.15 | 12.14 | 11.94 | 12.07 | 12.00 | 12.03 | 11.93 | 11.93 |
| 8.64  | 12.34 | 12.27 | 12.31 | 12.35 | 12.32 | 12.40 | 12.32 | 12.32 | 12.39 | 12.32 | 12.27 |
| 8.94  | 12.58 | 12.61 | 12.60 | 12.67 | 12.59 | 12.57 | 12.68 | 12.66 | 12.69 | 12.54 | 12.50 |
| 9.26  | 12.78 | 12.82 | 12.97 | 12.92 | 12.94 | 12.92 | 12.90 | 12.93 | 12.87 | 12.87 | 12.90 |
| 9.60  | 12.40 | 12.45 | 12.54 | 12.52 | 12.56 | 12.51 | 12.46 | 12.47 | 12.49 | 12.54 | 12.38 |
| 9.97  | 12.41 | 12.40 | 12.47 | 12.57 | 12.53 | 12.58 | 12.47 | 12.55 | 12.43 | 12.39 | 12.49 |
| 10.36 | 12.68 | 12.64 | 12.68 | 12.69 | 12.72 | 12.66 | 12.65 | 12.62 | 12.73 | 12.65 | 12.66 |
| 10.77 | 12.63 | 12.67 | 12.61 | 12.71 | 12.69 | 12.67 | 12.67 | 12.69 | 12.68 | 12.67 | 12.70 |
| 11.22 | 12.38 | 12.36 | 12.49 | 12.43 | 12.48 | 12.52 | 12.46 | 12.46 | 12.46 | 12.33 | 12.42 |
| 11.70 | 12.62 | 12.59 | 12.60 | 12.68 | 12.68 | 12.58 | 12.62 | 12.57 | 12.61 | 12.61 | 12.58 |
| 12.21 | 12.20 | 12.18 | 12.20 | 12.24 | 12.23 | 12.22 | 12.30 | 12.24 | 12.22 | 12.15 | 12.20 |
| 12.75 | 12.60 | 12.59 | 12.64 | 12.69 | 12.71 | 12.48 | 12.62 | 12.66 | 12.66 | 12.58 | 12.51 |
| 13.33 | 12.72 | 12.74 | 12.70 | 12.84 | 12.82 | 12.70 | 12.72 | 12.71 | 12.75 | 12.71 | 12.68 |
| 13.95 | 12.48 | 12.56 | 12.47 | 12.60 | 12.59 | 12.47 | 12.49 | 12.49 | 12.58 | 12.41 | 12.47 |
| 14.62 | 12.32 | 12.31 | 12.36 | 12.36 | 12.44 | 12.36 | 12.27 | 12.34 | 12.41 | 12.28 | 12.27 |
| 15.33 | 12.31 | 12.31 | 12.31 | 12.41 | 12.30 | 12.28 | 12.30 | 12.22 | 12.33 | 12.25 | 12.17 |
| 16.09 | 12.47 | 12.29 | 12.34 | 12.35 | 12.40 | 12.34 | 12.27 | 12.35 | 12.34 | 12.31 | 12.35 |
| 16.90 | 12.73 | 12.63 | 12.76 | 12.70 | 12.72 | 12.65 | 12.62 | 12.64 | 12.65 | 12.65 | 12.65 |
| 17.77 | 12.53 | 12.53 | 12.52 | 12.49 | 12.51 | 12.45 | 12.46 | 12.49 | 12.47 | 12.40 | 12.43 |
| 18.70 | 12.46 | 12.46 | 12.43 | 12.53 | 12.54 | 12.41 | 12.46 | 12.37 | 12.45 | 12.28 | 12.36 |
| 19.69 | 12.54 | 12.60 | 12.56 | 12.66 | 12.67 | 12.62 | 12.58 | 12.63 | 12.52 | 12.55 | 12.47 |
| 20.75 | 12.38 | 12.34 | 12.43 | 12.43 | 12.49 | 12.30 | 12.44 | 12.37 | 12.31 | 12.32 | 12.35 |
| 21.89 | 12.78 | 12.84 | 12.91 | 12.87 | 12.87 | 12.85 | 12.79 | 12.79 | 12.86 | 12.80 | 12.74 |
| 23.10 | 13.00 | 12.99 | 12.95 | 13.08 | 13.13 | 12.98 | 12.99 | 12.94 | 12.92 | 12.94 | 12.87 |
| 24.39 | 12.48 | 12.47 | 12.47 | 12.61 | 12.48 | 12.43 | 12.47 | 12.44 | 12.52 | 12.37 | 12.41 |
| 25.78 | 12.87 | 12.90 | 12.79 | 12.85 | 12.82 | 12.78 | 12.76 | 12.73 | 12.73 | 12.70 | 12.75 |
| 27.26 | 12.73 | 12.70 | 12.64 | 12.70 | 12.72 | 12.66 | 12.72 | 12.65 | 12.70 | 12.61 | 12.66 |
| 28.84 | 12.68 | 12.76 | 12.65 | 12.76 | 12.70 | 12.64 | 12.60 | 12.70 | 12.63 | 12.59 | 12.65 |
| 30.53 | 12.82 | 12.82 | 12.84 | 12.87 | 12.84 | 12.71 | 12.79 | 12.78 | 12.75 | 12.68 | 12.67 |
| 32.34 | 12.53 | 12.47 | 12.62 | 12.54 | 12.51 | 12.49 | 12.39 | 12.50 | 12.42 | 12.39 | 12.38 |
| 34.27 | 12.79 | 12.84 | 12.89 | 12.83 | 12.84 | 12.73 | 12.74 | 12.79 | 12.82 | 12.69 | 12.62 |
| 36.34 | 12.55 | 12.62 | 12.45 | 12.65 | 12.59 | 12.49 | 12.62 | 12.52 | 12.43 | 12.42 | 12.46 |
| 38.55 | 12.77 | 12.85 | 12.76 | 12.91 | 12.88 | 12.77 | 12.79 | 12.77 | 12.80 | 12.74 | 12.66 |
| 40.91 | 12.75 | 12.66 | 12.76 | 12.71 | 12.72 | 12.66 | 12.61 | 12.62 | 12.63 | 12.56 | 12.57 |
| 43.43 | 12.40 | 12.42 | 12.46 | 12.47 | 12.47 | 12.38 | 12.34 | 12.36 | 12.37 | 12.24 | 12.32 |
| 46.13 | 12.52 | 12.49 | 12.50 | 12.62 | 12.52 | 12.49 | 12.52 | 12.51 | 12.37 | 12.39 | 12.38 |
| 49.01 | 12.88 | 12.93 | 12.90 | 12.92 | 12.90 | 12.88 | 12.78 | 12.93 | 12.89 | 12.80 | 12.83 |
| 52.09 | 12.68 | 12.65 | 12.66 | 12.80 | 12.73 | 12.62 | 12.73 | 12.62 | 12.59 | 12.62 | 12.53 |
| 55.39 | 12.56 | 12.54 | 12.54 | 12.67 | 12.61 | 12.52 | 12.54 | 12.48 | 12.50 | 12.42 | 12.45 |
| 58.91 | 12.49 | 12.48 | 12.54 | 12.68 | 12.55 | 12.41 | 12.46 | 12.47 | 12.53 | 12.38 | 12.41 |
| 62.68 | 12.61 | 12.65 | 12.82 | 12.74 | 12.71 | 12.65 | 12.69 | 12.68 | 12.70 | 12.63 | 12.59 |
| 66.70 | 12.67 | 12.70 | 12.70 | 12.79 | 12.81 | 12.70 | 12.67 | 12.70 | 12.62 | 12.65 | 12.60 |
| 71.00 | 12.77 | 12.71 | 12.83 | 12.85 | 12.83 | 12.75 | 12.64 | 12.76 | 12.69 | 12.67 | 12.55 |
| 75.60 | 12.61 | 12.58 | 12.56 | 12.67 | 12.65 | 12.60 | 12.63 | 12.54 | 12.43 | 12.47 | 12.46 |

|         |       |       |       |       |       |       |       |       |       |       |       |
|---------|-------|-------|-------|-------|-------|-------|-------|-------|-------|-------|-------|
| 80.51   | 12.72 | 12.70 | 12.68 | 12.75 | 12.75 | 12.65 | 12.66 | 12.70 | 12.66 | 12.60 | 12.71 |
| 85.77   | 13.07 | 13.06 | 12.98 | 13.08 | 13.11 | 13.08 | 13.06 | 13.04 | 13.08 | 13.02 | 12.94 |
| 91.38   | 12.87 | 12.93 | 12.97 | 12.97 | 13.02 | 12.89 | 12.94 | 12.97 | 12.87 | 12.79 | 12.82 |
| 97.39   | 12.90 | 12.86 | 12.83 | 12.88 | 12.86 | 12.84 | 12.79 | 12.86 | 12.76 | 12.70 | 12.77 |
| 103.80  | 13.24 | 13.23 | 13.20 | 13.24 | 13.19 | 13.11 | 13.20 | 13.22 | 13.08 | 13.07 | 13.03 |
| 110.66  | 12.84 | 12.81 | 12.84 | 12.88 | 12.87 | 12.78 | 12.71 | 12.69 | 12.71 | 12.76 | 12.71 |
| 117.99  | 12.95 | 12.89 | 12.83 | 12.94 | 12.86 | 12.92 | 12.83 | 12.77 | 12.72 | 12.82 | 12.82 |
| 125.83  | 13.09 | 13.04 | 13.24 | 13.17 | 13.15 | 13.06 | 13.09 | 13.02 | 13.05 | 12.95 | 12.99 |
| 134.21  | 12.99 | 13.00 | 12.98 | 12.95 | 13.00 | 12.99 | 12.95 | 13.04 | 12.97 | 12.89 | 12.88 |
| 143.17  | 12.95 | 12.98 | 13.02 | 13.03 | 13.09 | 12.99 | 12.96 | 12.89 | 12.97 | 12.87 | 12.86 |
| 152.74  | 12.96 | 12.95 | 12.99 | 13.04 | 13.09 | 12.93 | 12.97 | 12.97 | 12.89 | 12.83 | 12.87 |
| 162.97  | 13.10 | 13.26 | 13.21 | 13.19 | 13.26 | 13.13 | 13.20 | 13.14 | 13.08 | 13.06 | 13.10 |
| 173.91  | 13.02 | 13.07 | 13.05 | 13.04 | 13.10 | 12.96 | 13.01 | 13.03 | 13.05 | 12.92 | 12.97 |
| 185.60  | 13.16 | 13.28 | 13.29 | 13.29 | 13.30 | 13.23 | 13.26 | 13.23 | 13.24 | 13.19 | 13.20 |
| 198.10  | 13.20 | 13.12 | 13.09 | 13.21 | 13.13 | 13.09 | 13.17 | 13.23 | 13.14 | 13.04 | 13.00 |
| 211.46  | 13.24 | 13.25 | 13.27 | 13.33 | 13.27 | 13.21 | 13.20 | 13.22 | 13.18 | 13.16 | 13.21 |
| 225.75  | 13.21 | 13.28 | 13.26 | 13.33 | 13.39 | 13.21 | 13.18 | 13.28 | 13.25 | 13.31 | 13.21 |
| 241.01  | 13.04 | 13.14 | 13.17 | 13.17 | 13.31 | 13.17 | 13.14 | 13.11 | 13.17 | 13.11 | 13.12 |
| 257.33  | 13.24 | 13.30 | 13.27 | 13.39 | 13.31 | 13.30 | 13.32 | 13.35 | 13.26 | 13.26 | 13.17 |
| 274.77  | 13.31 | 13.38 | 13.31 | 13.41 | 13.42 | 13.37 | 13.50 | 13.42 | 13.40 | 13.36 | 13.33 |
| 293.42  | 13.28 | 13.43 | 13.42 | 13.50 | 13.44 | 13.47 | 13.37 | 13.40 | 13.33 | 13.39 | 13.35 |
| 313.35  | 13.19 | 13.25 | 13.34 | 13.25 | 13.29 | 13.23 | 13.24 | 13.19 | 13.17 | 13.25 | 13.11 |
| 334.66  | 13.48 | 13.54 | 13.49 | 13.56 | 13.50 | 13.48 | 13.56 | 13.55 | 13.50 | 13.47 | 13.46 |
| 357.43  | 13.44 | 13.40 | 13.51 | 13.53 | 13.49 | 13.41 | 13.37 | 13.48 | 13.38 | 13.33 | 13.41 |
| 381.78  | 13.06 | 13.18 | 13.22 | 13.18 | 13.13 | 13.10 | 13.13 | 13.09 | 13.04 | 13.07 | 13.08 |
| 407.80  | 13.11 | 13.17 | 13.25 | 13.23 | 13.28 | 13.13 | 13.21 | 13.15 | 13.18 | 13.12 | 13.15 |
| 435.62  | 13.56 | 13.49 | 13.49 | 13.63 | 13.59 | 13.61 | 13.52 | 13.45 | 13.46 | 13.37 | 13.42 |
| 465.35  | 13.27 | 13.26 | 13.30 | 13.31 | 13.28 | 13.33 | 13.31 | 13.24 | 13.27 | 13.21 | 13.31 |
| 497.14  | 13.25 | 13.40 | 13.29 | 13.46 | 13.30 | 13.27 | 13.30 | 13.34 | 13.22 | 13.25 | 13.25 |
| 531.11  | 12.98 | 13.02 | 13.02 | 13.11 | 13.05 | 13.03 | 13.08 | 13.06 | 13.09 | 13.05 | 12.96 |
| 567.43  | 13.41 | 13.46 | 13.39 | 13.44 | 13.49 | 13.44 | 13.38 | 13.44 | 13.34 | 13.34 | 13.38 |
| 606.26  | 13.35 | 13.41 | 13.43 | 13.50 | 13.46 | 13.36 | 13.42 | 13.50 | 13.43 | 13.30 | 13.33 |
| 647.76  | 13.19 | 13.30 | 13.28 | 13.38 | 13.30 | 13.21 | 13.33 | 13.22 | 13.25 | 13.20 | 13.14 |
| 692.12  | 12.87 | 12.84 | 13.00 | 12.93 | 12.94 | 12.93 | 12.87 | 12.85 | 12.83 | 12.77 | 12.90 |
| 739.53  | 13.28 | 13.26 | 13.32 | 13.31 | 13.30 | 13.19 | 13.30 | 13.29 | 13.28 | 13.17 | 13.23 |
| 790.22  | 13.10 | 13.20 | 13.15 | 13.28 | 13.26 | 13.27 | 13.16 | 13.24 | 13.19 | 13.14 | 13.07 |
| 844.40  | 13.18 | 13.23 | 13.25 | 13.21 | 13.18 | 13.16 | 13.20 | 13.09 | 13.23 | 13.16 | 13.10 |
| 902.32  | 13.24 | 13.24 | 13.26 | 13.29 | 13.25 | 13.26 | 13.20 | 13.24 | 13.16 | 13.09 | 13.13 |
| 964.23  | 12.98 | 13.05 | 13.00 | 13.12 | 13.04 | 13.00 | 12.93 | 12.95 | 12.86 | 12.88 | 12.89 |
| 1030.41 | 13.13 | 13.11 | 13.17 | 13.24 | 13.11 | 13.08 | 13.12 | 13.06 | 13.01 | 13.05 | 12.93 |
| 1101.15 | 13.08 | 13.09 | 13.05 | 13.22 | 13.07 | 12.97 | 13.05 | 13.06 | 12.97 | 12.95 | 12.95 |
| 1176.77 | 13.09 | 13.13 | 13.11 | 13.20 | 13.15 | 13.14 | 13.09 | 13.05 | 13.01 | 12.98 | 12.97 |
| 1257.60 | 13.04 | 13.07 | 13.06 | 13.18 | 13.22 | 13.07 | 13.02 | 13.12 | 13.05 | 12.95 | 13.03 |
| 1344.00 | 12.98 | 13.01 | 13.03 | 13.03 | 13.05 | 13.00 | 12.98 | 12.98 | 12.97 | 12.90 | 12.87 |
| 1436.36 | 12.88 | 12.89 | 12.88 | 12.94 | 12.85 | 12.74 | 12.87 | 12.85 | 12.80 | 12.77 | 12.72 |
| 1535.09 | 13.00 | 13.04 | 13.04 | 13.14 | 13.02 | 13.06 | 13.03 | 13.03 | 12.98 | 12.82 | 12.86 |
| 1640.63 | 12.87 | 12.91 | 12.96 | 13.01 | 12.97 | 12.83 | 12.84 | 12.89 | 12.94 | 12.76 | 12.86 |
| 1753.44 | 12.82 | 12.92 | 12.90 | 12.99 | 12.93 | 12.79 | 12.88 | 12.80 | 12.77 | 12.73 | 12.69 |
| 1874.02 | 12.78 | 12.83 | 12.87 | 12.86 | 12.82 | 12.79 | 12.82 | 12.82 | 12.72 | 12.68 | 12.72 |
| 2002.92 | 12.73 | 12.69 | 12.78 | 12.87 | 12.82 | 12.69 | 12.68 | 12.63 | 12.59 | 12.61 | 12.57 |

|         |       |       |       |       |       |       |       |       |       |       |       |
|---------|-------|-------|-------|-------|-------|-------|-------|-------|-------|-------|-------|
| 2140.71 | 12.57 | 12.53 | 12.56 | 12.58 | 12.58 | 12.55 | 12.50 | 12.46 | 12.38 | 12.46 | 12.35 |
| 2288.00 | 12.62 | 12.58 | 12.51 | 12.62 | 12.60 | 12.45 | 12.52 | 12.54 | 12.46 | 12.43 | 12.40 |
| 2445.44 | 12.61 | 12.52 | 12.54 | 12.54 | 12.50 | 12.50 | 12.44 | 12.43 | 12.44 | 12.34 | 12.35 |
| 2613.73 | 12.59 | 12.52 | 12.64 | 12.59 | 12.59 | 12.52 | 12.52 | 12.53 | 12.37 | 12.40 | 12.29 |
| 2793.63 | 12.25 | 12.32 | 12.35 | 12.39 | 12.37 | 12.23 | 12.19 | 12.15 | 12.09 | 12.02 | 12.08 |
| 2985.93 | 12.15 | 12.14 | 12.09 | 12.24 | 12.07 | 12.00 | 11.98 | 12.00 | 11.83 | 11.93 | 11.80 |
| 3191.49 | 12.10 | 12.02 | 12.01 | 12.13 | 12.11 | 12.03 | 11.89 | 11.90 | 11.91 | 11.79 | 11.75 |
| 3411.21 | 11.94 | 11.82 | 11.90 | 11.86 | 11.84 | 11.75 | 11.71 | 11.71 | 11.55 | 11.58 | 11.54 |
| 3646.09 | 11.92 | 11.75 | 11.84 | 11.84 | 11.85 | 11.76 | 11.64 | 11.66 | 11.46 | 11.54 | 11.46 |
| 3897.16 | 11.63 | 11.63 | 11.68 | 11.63 | 11.66 | 11.51 | 11.54 | 11.51 | 11.38 | 11.30 | 11.25 |

| Wavelength (nm) \ Time (ps) | 584.72 | 586.15 | 587.57 | 588.99 | 590.42 | 591.84 | 593.27 | 594.69 | 596.12 | 597.54 | 598.96 |
|-----------------------------|--------|--------|--------|--------|--------|--------|--------|--------|--------|--------|--------|
| -2.74                       | 0.00   | 0.08   | 0.01   | 0.05   | 0.03   | -0.02  | 0.06   | -0.07  | 0.02   | 0.05   | 0.02   |
| -2.24                       | -0.07  | -0.13  | -0.09  | -0.07  | -0.08  | 0.00   | -0.15  | -0.12  | -0.11  | 0.02   | -0.13  |
| -1.74                       | 0.01   | -0.03  | 0.06   | 0.05   | -0.05  | -0.01  | 0.07   | 0.07   | 0.00   | -0.04  | -0.08  |
| -1.24                       | -0.01  | 0.01   | 0.08   | 0.06   | 0.07   | 0.04   | -0.01  | 0.09   | -0.01  | 0.06   | -0.01  |
| -0.74                       | 0.06   | -0.03  | -0.04  | -0.02  | -0.03  | -0.01  | 0.06   | 0.00   | -0.03  | 0.01   | 0.12   |
| -0.24                       | 0.00   | 0.01   | 0.03   | -0.03  | -0.02  | -0.12  | -0.08  | -0.02  | -0.01  | -0.02  | -0.01  |
| -0.14                       | 0.01   | 0.06   | -0.02  | 0.01   | 0.02   | 0.05   | 0.03   | 0.05   | 0.14   | 0.04   | 0.05   |
| -0.04                       | 0.01   | 0.03   | -0.02  | -0.05  | 0.06   | 0.08   | 0.02   | 0.00   | 0.00   | -0.11  | 0.04   |
| 0.06                        | 0.00   | 0.03   | 0.01   | -0.01  | -0.05  | -0.05  | -0.09  | -0.04  | 0.03   | -0.01  | 0.03   |
| 0.16                        | 0.01   | 0.00   | -0.10  | -0.07  | 0.04   | -0.02  | -0.08  | -0.07  | 0.01   | -0.08  | -0.02  |
| 0.26                        | -0.03  | -0.06  | -0.11  | -0.01  | 0.02   | 0.04   | -0.07  | 0.04   | -0.03  | -0.08  | -0.04  |
| 0.31                        | 0.00   | -0.03  | -0.03  | -0.08  | 0.02   | -0.10  | 0.01   | -0.03  | -0.02  | -0.04  | -0.06  |
| 0.36                        | 0.04   | -0.03  | 0.06   | 0.04   | 0.12   | -0.01  | 0.00   | 0.01   | 0.00   | -0.06  | 0.01   |
| 0.41                        | 0.04   | 0.06   | 0.00   | -0.01  | 0.00   | -0.04  | 0.06   | -0.11  | 0.03   | 0.02   | 0.02   |
| 0.46                        | 0.01   | 0.07   | 0.01   | -0.06  | 0.02   | 0.13   | -0.03  | -0.03  | -0.01  | -0.02  | 0.03   |
| 0.51                        | 0.06   | -0.02  | -0.03  | 0.02   | -0.07  | 0.00   | 0.09   | -0.02  | 0.03   | 0.00   | -0.02  |
| 0.56                        | -0.04  | 0.04   | 0.01   | -0.01  | -0.03  | 0.05   | 0.05   | -0.05  | 0.10   | 0.00   | -0.07  |
| 0.61                        | -0.01  | -0.04  | 0.00   | -0.01  | -0.02  | 0.03   | -0.03  | -0.09  | -0.03  | -0.03  | -0.04  |
| 0.66                        | 0.01   | 0.02   | 0.06   | 0.04   | 0.09   | 0.03   | 0.10   | -0.02  | -0.02  | -0.09  | -0.05  |
| 0.71                        | -0.01  | 0.00   | 0.08   | 0.01   | 0.04   | -0.02  | 0.04   | -0.04  | 0.01   | 0.02   | 0.03   |
| 0.76                        | -0.04  | -0.06  | -0.09  | -0.05  | -0.05  | -0.05  | -0.07  | -0.03  | -0.04  | -0.06  | -0.10  |
| 0.81                        | 0.03   | 0.03   | 0.05   | 0.04   | 0.10   | 0.01   | -0.01  | 0.04   | 0.01   | 0.03   | -0.05  |
| 0.86                        | 0.06   | 0.01   | 0.08   | -0.02  | 0.05   | 0.03   | 0.10   | -0.01  | -0.04  | 0.04   | -0.01  |
| 0.91                        | 0.04   | 0.00   | -0.03  | 0.02   | 0.04   | -0.06  | -0.06  | -0.03  | -0.01  | -0.06  | -0.07  |
| 0.96                        | -0.04  | 0.06   | -0.01  | -0.12  | -0.06  | -0.04  | -0.08  | 0.02   | 0.02   | -0.01  | -0.11  |
| 1.01                        | -0.10  | -0.06  | -0.10  | -0.09  | -0.07  | -0.11  | -0.12  | -0.10  | -0.04  | -0.07  | -0.09  |
| 1.06                        | 0.06   | 0.00   | 0.00   | 0.00   | 0.03   | 0.08   | -0.04  | -0.03  | -0.01  | -0.01  | 0.03   |
| 1.11                        | 0.03   | -0.05  | -0.06  | 0.07   | 0.02   | 0.05   | -0.02  | 0.03   | -0.13  | -0.04  | 0.04   |
| 1.16                        | 0.10   | 0.11   | 0.00   | -0.01  | 0.05   | 0.00   | 0.02   | 0.01   | -0.02  | -0.05  | 0.01   |
| 1.21                        | 0.05   | -0.03  | 0.02   | 0.02   | -0.09  | 0.00   | 0.00   | 0.01   | 0.07   | -0.02  | -0.09  |
| 1.26                        | -0.41  | -0.54  | -0.52  | -0.21  | -0.20  | -0.07  | -0.08  | -0.08  | -0.18  | -0.08  | 0.08   |
| 1.31                        | -14.66 | -10.35 | -7.25  | -5.16  | -3.88  | -3.13  | -2.70  | -2.32  | -2.03  | -1.45  | -0.82  |
| 1.36                        | 96.31  | 88.64  | 80.17  | 71.51  | 61.92  | 52.41  | 43.09  | 34.45  | 26.38  | 19.37  | 13.37  |
| 1.41                        | 53.24  | 72.04  | 89.96  | 107.36 | 122.43 | 135.48 | 146.09 | 154.24 | 159.59 | 162.57 | 163.07 |
| 1.46                        | 10.40  | 9.35   | 7.80   | 5.86   | 3.38   | 0.37   | -3.30  | -7.56  | -12.08 | -16.90 | -21.72 |
| 1.51                        | 16.39  | 16.83  | 17.20  | 17.77  | 18.19  | 18.54  | 18.95  | 19.21  | 19.47  | 19.70  | 19.92  |

|      |       |       |       |       |       |       |       |       |       |       |       |
|------|-------|-------|-------|-------|-------|-------|-------|-------|-------|-------|-------|
| 1.56 | 16.37 | 16.63 | 16.88 | 17.03 | 17.06 | 17.12 | 17.26 | 17.33 | 17.19 | 17.03 | 16.84 |
| 1.61 | 13.94 | 13.83 | 13.75 | 13.66 | 13.67 | 13.62 | 13.72 | 13.78 | 13.96 | 14.28 | 14.51 |
| 1.66 | 14.40 | 14.32 | 14.31 | 14.41 | 14.27 | 14.18 | 14.10 | 13.87 | 13.80 | 13.71 | 13.57 |
| 1.71 | 12.89 | 12.95 | 13.15 | 13.25 | 13.42 | 13.44 | 13.81 | 13.94 | 14.11 | 14.35 | 14.58 |
| 1.76 | 13.78 | 13.76 | 13.81 | 13.73 | 13.67 | 13.62 | 13.44 | 13.50 | 13.46 | 13.52 | 13.46 |
| 1.81 | 13.69 | 13.92 | 13.89 | 13.82 | 13.86 | 13.76 | 13.68 | 13.62 | 13.46 | 13.28 | 13.07 |
| 1.86 | 12.58 | 12.68 | 12.79 | 12.86 | 12.87 | 13.11 | 13.17 | 13.40 | 13.51 | 13.67 | 13.86 |
| 1.91 | 12.79 | 12.67 | 12.67 | 12.57 | 12.60 | 12.44 | 12.30 | 12.30 | 12.14 | 12.15 | 12.14 |
| 1.96 | 13.01 | 13.12 | 13.18 | 13.33 | 13.48 | 13.46 | 13.50 | 13.52 | 13.53 | 13.58 | 13.53 |
| 2.01 | 12.73 | 12.72 | 12.68 | 12.64 | 12.61 | 12.57 | 12.59 | 12.62 | 12.82 | 12.84 | 12.88 |
| 2.06 | 13.10 | 13.04 | 13.07 | 12.99 | 13.03 | 12.84 | 12.78 | 12.72 | 12.59 | 12.43 | 12.29 |
| 2.11 | 12.48 | 12.59 | 12.67 | 12.75 | 12.84 | 12.97 | 13.00 | 13.12 | 13.19 | 13.39 | 13.38 |
| 2.16 | 12.60 | 12.60 | 12.54 | 12.51 | 12.54 | 12.42 | 12.44 | 12.45 | 12.42 | 12.55 | 12.52 |
| 2.21 | 13.16 | 13.24 | 13.26 | 13.21 | 13.27 | 13.23 | 13.14 | 13.17 | 13.07 | 12.94 | 12.76 |
| 2.26 | 12.62 | 12.59 | 12.63 | 12.72 | 12.70 | 12.69 | 12.84 | 12.92 | 12.98 | 12.96 | 13.12 |
| 2.31 | 12.57 | 12.51 | 12.50 | 12.57 | 12.38 | 12.45 | 12.36 | 12.28 | 12.23 | 12.10 | 12.06 |
| 2.36 | 12.67 | 12.65 | 12.71 | 12.67 | 12.75 | 12.71 | 12.81 | 12.73 | 12.67 | 12.59 | 12.53 |
| 2.41 | 12.31 | 12.32 | 12.38 | 12.33 | 12.40 | 12.37 | 12.40 | 12.53 | 12.53 | 12.74 | 12.74 |
| 2.46 | 12.38 | 12.38 | 12.34 | 12.31 | 12.25 | 12.29 | 12.17 | 12.23 | 12.06 | 12.04 | 11.88 |
| 2.51 | 12.62 | 12.68 | 12.80 | 12.75 | 12.82 | 12.86 | 12.97 | 13.09 | 13.23 | 13.12 | 13.19 |
| 2.56 | 12.48 | 12.61 | 12.56 | 12.49 | 12.37 | 12.42 | 12.38 | 12.34 | 12.40 | 12.44 | 12.47 |
| 2.61 | 12.34 | 12.29 | 12.30 | 12.28 | 12.29 | 12.12 | 12.13 | 12.01 | 11.99 | 11.83 | 11.81 |
| 2.66 | 12.36 | 12.43 | 12.42 | 12.46 | 12.47 | 12.52 | 12.59 | 12.73 | 12.72 | 12.80 | 12.82 |
| 2.71 | 12.27 | 12.13 | 12.24 | 12.16 | 12.14 | 12.13 | 12.12 | 12.05 | 11.95 | 11.95 | 11.94 |
| 2.76 | 12.73 | 12.56 | 12.71 | 12.73 | 12.68 | 12.71 | 12.62 | 12.71 | 12.58 | 12.52 | 12.50 |
| 2.81 | 12.10 | 12.04 | 12.12 | 12.01 | 12.14 | 12.16 | 12.14 | 12.18 | 12.24 | 12.22 | 12.33 |
| 2.86 | 12.17 | 12.19 | 12.12 | 12.14 | 11.99 | 12.02 | 11.97 | 11.83 | 11.84 | 11.81 | 11.78 |
| 2.91 | 12.31 | 12.40 | 12.52 | 12.49 | 12.54 | 12.60 | 12.59 | 12.68 | 12.61 | 12.59 | 12.54 |
| 2.96 | 12.54 | 12.50 | 12.48 | 12.36 | 12.44 | 12.40 | 12.43 | 12.36 | 12.44 | 12.46 | 12.57 |
| 3.01 | 12.58 | 12.58 | 12.66 | 12.57 | 12.61 | 12.46 | 12.48 | 12.46 | 12.48 | 12.41 | 12.43 |
| 3.06 | 11.89 | 11.97 | 11.99 | 11.93 | 12.01 | 11.94 | 12.01 | 12.13 | 12.04 | 12.09 | 12.12 |
| 3.11 | 12.31 | 12.13 | 12.24 | 12.18 | 12.18 | 12.09 | 12.08 | 12.16 | 12.04 | 12.05 | 12.08 |
| 3.16 | 12.34 | 12.45 | 12.40 | 12.43 | 12.41 | 12.32 | 12.37 | 12.45 | 12.29 | 12.25 | 12.20 |
| 3.21 | 12.06 | 12.05 | 12.16 | 12.03 | 12.17 | 12.08 | 12.12 | 12.15 | 12.10 | 12.16 | 12.11 |
| 3.26 | 12.18 | 12.16 | 12.25 | 12.13 | 12.11 | 12.14 | 12.06 | 12.00 | 12.03 | 11.97 | 11.91 |
| 3.31 | 12.21 | 12.30 | 12.29 | 12.34 | 12.32 | 12.21 | 12.26 | 12.29 | 12.27 | 12.21 | 12.19 |
| 3.36 | 12.36 | 12.23 | 12.28 | 12.29 | 12.21 | 12.15 | 12.17 | 12.22 | 12.19 | 12.28 | 12.25 |
| 3.41 | 12.45 | 12.42 | 12.41 | 12.49 | 12.38 | 12.39 | 12.35 | 12.29 | 12.30 | 12.25 | 12.25 |
| 3.46 | 12.22 | 12.16 | 12.18 | 12.25 | 12.20 | 12.15 | 12.25 | 12.20 | 12.11 | 12.21 | 12.05 |
| 3.51 | 12.35 | 12.39 | 12.39 | 12.26 | 12.28 | 12.28 | 12.20 | 12.22 | 12.15 | 12.24 | 12.19 |
| 3.56 | 12.11 | 12.21 | 12.17 | 12.16 | 12.16 | 12.23 | 12.14 | 12.12 | 12.08 | 11.99 | 11.96 |
| 3.61 | 11.86 | 11.91 | 11.93 | 11.86 | 11.92 | 11.85 | 11.88 | 11.87 | 11.87 | 11.90 | 11.86 |
| 3.66 | 11.86 | 11.90 | 11.99 | 11.91 | 11.86 | 11.88 | 11.88 | 11.76 | 11.83 | 11.76 | 11.70 |
| 3.71 | 12.32 | 12.48 | 12.46 | 12.48 | 12.48 | 12.43 | 12.41 | 12.42 | 12.38 | 12.42 | 12.39 |
| 3.76 | 12.71 | 12.67 | 12.59 | 12.59 | 12.59 | 12.56 | 12.57 | 12.64 | 12.67 | 12.58 | 12.65 |
| 3.81 | 12.01 | 11.99 | 12.04 | 11.96 | 11.89 | 11.83 | 11.83 | 11.83 | 11.74 | 11.77 | 11.71 |
| 3.86 | 11.85 | 11.85 | 11.82 | 11.91 | 11.79 | 11.82 | 11.82 | 11.87 | 11.89 | 11.90 | 11.89 |
| 3.91 | 12.43 | 12.36 | 12.42 | 12.40 | 12.43 | 12.34 | 12.35 | 12.37 | 12.28 | 12.29 | 12.40 |
| 3.96 | 12.24 | 12.17 | 12.26 | 12.32 | 12.26 | 12.19 | 12.21 | 12.06 | 12.15 | 12.04 | 12.08 |
| 4.01 | 12.33 | 12.28 | 12.36 | 12.34 | 12.37 | 12.29 | 12.34 | 12.38 | 12.34 | 12.34 | 12.39 |

|      |       |       |       |       |       |       |       |       |       |       |       |
|------|-------|-------|-------|-------|-------|-------|-------|-------|-------|-------|-------|
| 4.06 | 12.46 | 12.45 | 12.45 | 12.37 | 12.39 | 12.37 | 12.29 | 12.30 | 12.31 | 12.30 | 12.28 |
| 4.11 | 12.25 | 12.31 | 12.28 | 12.40 | 12.24 | 12.25 | 12.27 | 12.19 | 12.21 | 12.25 | 12.18 |
| 4.16 | 12.34 | 12.33 | 12.39 | 12.34 | 12.35 | 12.27 | 12.36 | 12.40 | 12.26 | 12.23 | 12.22 |
| 4.21 | 12.81 | 12.77 | 12.78 | 12.72 | 12.76 | 12.63 | 12.58 | 12.62 | 12.53 | 12.56 | 12.53 |
| 4.26 | 12.26 | 12.23 | 12.25 | 12.22 | 12.23 | 12.22 | 12.15 | 12.23 | 12.20 | 12.20 | 12.24 |
| 4.31 | 12.13 | 12.09 | 12.15 | 12.08 | 12.05 | 12.13 | 12.04 | 12.05 | 12.08 | 11.97 | 12.03 |
| 4.36 | 12.18 | 12.16 | 12.20 | 12.15 | 12.20 | 12.18 | 12.17 | 12.10 | 12.05 | 12.00 | 12.02 |
| 4.41 | 12.05 | 12.04 | 12.07 | 12.08 | 12.06 | 12.13 | 12.06 | 12.15 | 12.11 | 12.12 | 12.13 |
| 4.46 | 12.52 | 12.56 | 12.51 | 12.51 | 12.52 | 12.41 | 12.47 | 12.37 | 12.33 | 12.33 | 12.37 |
| 4.51 | 12.35 | 12.33 | 12.34 | 12.30 | 12.37 | 12.40 | 12.28 | 12.39 | 12.29 | 12.23 | 12.19 |
| 4.56 | 12.12 | 12.10 | 12.12 | 12.11 | 12.09 | 12.14 | 12.10 | 12.04 | 12.05 | 11.95 | 12.01 |
| 4.61 | 12.04 | 11.94 | 11.96 | 11.85 | 11.93 | 11.93 | 11.94 | 11.90 | 11.92 | 11.91 | 11.91 |
| 4.66 | 12.33 | 12.39 | 12.39 | 12.44 | 12.47 | 12.33 | 12.43 | 12.32 | 12.29 | 12.28 | 12.20 |
| 4.71 | 12.32 | 12.28 | 12.25 | 12.28 | 12.28 | 12.28 | 12.24 | 12.17 | 12.26 | 12.23 | 12.15 |
| 4.76 | 12.67 | 12.63 | 12.66 | 12.66 | 12.73 | 12.54 | 12.55 | 12.59 | 12.49 | 12.48 | 12.46 |
| 4.81 | 12.16 | 12.20 | 12.26 | 12.19 | 12.19 | 12.11 | 12.14 | 12.08 | 12.14 | 12.20 | 12.03 |
| 4.86 | 12.09 | 12.05 | 12.04 | 12.06 | 12.12 | 11.92 | 12.02 | 12.10 | 11.96 | 11.89 | 11.90 |
| 4.91 | 12.52 | 12.62 | 12.55 | 12.54 | 12.51 | 12.57 | 12.53 | 12.45 | 12.40 | 12.31 | 12.42 |
| 4.96 | 12.21 | 12.12 | 12.12 | 12.20 | 12.28 | 12.26 | 12.01 | 12.12 | 12.18 | 12.10 | 12.13 |
| 5.01 | 12.17 | 12.25 | 12.19 | 12.24 | 12.21 | 12.19 | 12.14 | 12.14 | 12.04 | 12.13 | 11.93 |
| 5.06 | 12.30 | 12.50 | 12.40 | 12.32 | 12.37 | 12.42 | 12.29 | 12.35 | 12.27 | 12.22 | 12.26 |
| 5.11 | 12.16 | 12.08 | 12.18 | 12.13 | 12.06 | 12.14 | 12.08 | 12.07 | 12.04 | 12.04 | 12.05 |
| 5.16 | 12.03 | 12.04 | 12.11 | 12.20 | 12.03 | 12.05 | 11.95 | 11.95 | 11.98 | 11.83 | 11.89 |
| 5.21 | 12.23 | 12.18 | 12.28 | 12.27 | 12.18 | 12.21 | 12.20 | 12.14 | 12.21 | 12.16 | 12.06 |
| 5.26 | 12.55 | 12.50 | 12.50 | 12.45 | 12.42 | 12.44 | 12.38 | 12.47 | 12.47 | 12.36 | 12.38 |
| 5.31 | 12.45 | 12.43 | 12.37 | 12.32 | 12.31 | 12.26 | 12.31 | 12.31 | 12.30 | 12.23 | 12.23 |
| 5.38 | 12.24 | 12.31 | 12.37 | 12.34 | 12.21 | 12.29 | 12.17 | 12.22 | 12.23 | 12.21 | 12.09 |
| 5.45 | 12.60 | 12.64 | 12.67 | 12.54 | 12.68 | 12.53 | 12.50 | 12.55 | 12.53 | 12.51 | 12.54 |
| 5.53 | 12.41 | 12.37 | 12.23 | 12.20 | 12.28 | 12.32 | 12.28 | 12.25 | 12.11 | 12.17 | 12.07 |
| 5.61 | 12.57 | 12.60 | 12.64 | 12.63 | 12.57 | 12.55 | 12.47 | 12.60 | 12.54 | 12.42 | 12.47 |
| 5.70 | 12.47 | 12.41 | 12.55 | 12.51 | 12.42 | 12.33 | 12.34 | 12.33 | 12.28 | 12.32 | 12.20 |
| 5.80 | 12.58 | 12.57 | 12.60 | 12.61 | 12.50 | 12.48 | 12.44 | 12.42 | 12.41 | 12.38 | 12.39 |
| 5.90 | 12.01 | 12.07 | 12.09 | 12.12 | 12.17 | 12.08 | 12.02 | 11.98 | 11.95 | 11.95 | 11.91 |
| 6.01 | 12.75 | 12.71 | 12.71 | 12.73 | 12.69 | 12.65 | 12.65 | 12.60 | 12.59 | 12.58 | 12.58 |
| 6.13 | 12.28 | 12.24 | 12.32 | 12.26 | 12.32 | 12.21 | 12.19 | 12.17 | 12.16 | 12.17 | 12.11 |
| 6.25 | 12.09 | 12.12 | 12.11 | 12.13 | 12.07 | 11.97 | 12.08 | 12.00 | 11.97 | 11.86 | 11.88 |
| 6.39 | 12.17 | 12.10 | 12.22 | 12.11 | 12.10 | 12.03 | 12.02 | 12.07 | 11.96 | 12.05 | 11.86 |
| 6.53 | 12.21 | 12.23 | 12.21 | 12.30 | 12.15 | 12.08 | 12.08 | 12.08 | 12.01 | 11.97 | 11.97 |
| 6.69 | 12.38 | 12.34 | 12.34 | 12.41 | 12.32 | 12.32 | 12.27 | 12.21 | 12.23 | 12.27 | 12.18 |
| 6.85 | 12.19 | 12.19 | 12.26 | 12.12 | 12.17 | 12.10 | 12.10 | 12.03 | 12.10 | 12.11 | 11.96 |
| 7.03 | 12.34 | 12.27 | 12.32 | 12.24 | 12.25 | 12.13 | 12.19 | 12.05 | 12.18 | 12.06 | 12.15 |
| 7.21 | 12.40 | 12.38 | 12.44 | 12.33 | 12.30 | 12.26 | 12.26 | 12.22 | 12.19 | 12.18 | 12.17 |
| 7.41 | 12.38 | 12.39 | 12.42 | 12.41 | 12.34 | 12.27 | 12.28 | 12.26 | 12.23 | 12.25 | 12.21 |
| 7.63 | 12.87 | 12.87 | 12.81 | 12.74 | 12.74 | 12.72 | 12.66 | 12.65 | 12.64 | 12.47 | 12.56 |
| 7.86 | 12.34 | 12.33 | 12.36 | 12.25 | 12.30 | 12.26 | 12.24 | 12.20 | 12.16 | 12.18 | 12.09 |
| 8.10 | 12.33 | 12.40 | 12.38 | 12.38 | 12.26 | 12.27 | 12.23 | 12.19 | 12.16 | 12.17 | 12.15 |
| 8.36 | 11.94 | 11.93 | 11.99 | 11.89 | 11.95 | 11.83 | 11.81 | 11.87 | 11.86 | 11.85 | 11.73 |
| 8.64 | 12.28 | 12.28 | 12.29 | 12.30 | 12.19 | 12.21 | 12.15 | 12.16 | 12.20 | 12.04 | 12.03 |
| 8.94 | 12.61 | 12.57 | 12.51 | 12.55 | 12.54 | 12.47 | 12.40 | 12.39 | 12.28 | 12.31 | 12.37 |
| 9.26 | 12.87 | 12.90 | 12.79 | 12.84 | 12.78 | 12.83 | 12.69 | 12.67 | 12.59 | 12.61 | 12.61 |

|        |       |       |       |       |       |       |       |       |       |       |       |
|--------|-------|-------|-------|-------|-------|-------|-------|-------|-------|-------|-------|
| 9.60   | 12.42 | 12.37 | 12.40 | 12.36 | 12.30 | 12.37 | 12.30 | 12.28 | 12.30 | 12.23 | 12.16 |
| 9.97   | 12.49 | 12.43 | 12.43 | 12.42 | 12.36 | 12.34 | 12.33 | 12.26 | 12.28 | 12.30 | 12.21 |
| 10.36  | 12.58 | 12.60 | 12.55 | 12.48 | 12.55 | 12.45 | 12.40 | 12.48 | 12.42 | 12.33 | 12.35 |
| 10.77  | 12.52 | 12.61 | 12.57 | 12.54 | 12.55 | 12.47 | 12.42 | 12.45 | 12.36 | 12.47 | 12.37 |
| 11.22  | 12.38 | 12.35 | 12.31 | 12.21 | 12.27 | 12.14 | 12.20 | 12.23 | 12.14 | 12.06 | 12.08 |
| 11.70  | 12.55 | 12.48 | 12.42 | 12.46 | 12.42 | 12.40 | 12.36 | 12.35 | 12.28 | 12.30 | 12.22 |
| 12.21  | 12.19 | 12.12 | 12.13 | 12.06 | 12.13 | 11.97 | 11.95 | 12.07 | 11.99 | 11.91 | 11.87 |
| 12.75  | 12.57 | 12.53 | 12.46 | 12.47 | 12.47 | 12.39 | 12.41 | 12.29 | 12.43 | 12.21 | 12.34 |
| 13.33  | 12.60 | 12.63 | 12.63 | 12.56 | 12.47 | 12.49 | 12.50 | 12.48 | 12.41 | 12.30 | 12.36 |
| 13.95  | 12.40 | 12.45 | 12.42 | 12.48 | 12.38 | 12.38 | 12.29 | 12.30 | 12.17 | 12.18 | 12.07 |
| 14.62  | 12.30 | 12.32 | 12.25 | 12.17 | 12.17 | 12.19 | 12.05 | 12.10 | 12.06 | 12.06 | 12.02 |
| 15.33  | 12.17 | 12.13 | 12.27 | 12.16 | 12.06 | 12.02 | 11.97 | 11.96 | 11.96 | 11.93 | 11.87 |
| 16.09  | 12.25 | 12.21 | 12.28 | 12.20 | 12.14 | 12.07 | 12.00 | 12.01 | 12.14 | 12.06 | 12.02 |
| 16.90  | 12.58 | 12.51 | 12.62 | 12.56 | 12.39 | 12.42 | 12.36 | 12.33 | 12.27 | 12.17 | 12.20 |
| 17.77  | 12.32 | 12.35 | 12.34 | 12.30 | 12.27 | 12.20 | 12.17 | 12.17 | 12.09 | 12.05 | 12.04 |
| 18.70  | 12.27 | 12.22 | 12.29 | 12.23 | 12.21 | 12.12 | 12.14 | 12.12 | 12.03 | 12.06 | 12.03 |
| 19.69  | 12.44 | 12.50 | 12.41 | 12.51 | 12.39 | 12.32 | 12.22 | 12.23 | 12.19 | 12.19 | 12.19 |
| 20.75  | 12.33 | 12.28 | 12.32 | 12.20 | 12.17 | 12.16 | 12.16 | 12.07 | 12.09 | 12.09 | 11.97 |
| 21.89  | 12.73 | 12.65 | 12.62 | 12.62 | 12.60 | 12.54 | 12.46 | 12.49 | 12.34 | 12.46 | 12.28 |
| 23.10  | 12.85 | 12.86 | 12.77 | 12.83 | 12.69 | 12.74 | 12.63 | 12.56 | 12.58 | 12.60 | 12.60 |
| 24.39  | 12.41 | 12.27 | 12.30 | 12.27 | 12.29 | 12.23 | 12.19 | 12.18 | 12.10 | 12.04 | 12.04 |
| 25.78  | 12.74 | 12.65 | 12.67 | 12.57 | 12.55 | 12.56 | 12.47 | 12.41 | 12.35 | 12.42 | 12.26 |
| 27.26  | 12.49 | 12.55 | 12.51 | 12.39 | 12.40 | 12.34 | 12.28 | 12.28 | 12.21 | 12.26 | 12.15 |
| 28.84  | 12.55 | 12.57 | 12.60 | 12.46 | 12.50 | 12.37 | 12.36 | 12.31 | 12.24 | 12.21 | 12.21 |
| 30.53  | 12.64 | 12.63 | 12.62 | 12.66 | 12.50 | 12.50 | 12.50 | 12.45 | 12.43 | 12.31 | 12.22 |
| 32.34  | 12.37 | 12.39 | 12.33 | 12.32 | 12.26 | 12.22 | 12.19 | 12.09 | 12.15 | 12.10 | 12.00 |
| 34.27  | 12.69 | 12.65 | 12.60 | 12.51 | 12.59 | 12.46 | 12.50 | 12.38 | 12.37 | 12.40 | 12.34 |
| 36.34  | 12.36 | 12.39 | 12.38 | 12.32 | 12.25 | 12.23 | 12.24 | 12.17 | 12.11 | 12.21 | 12.10 |
| 38.55  | 12.65 | 12.54 | 12.67 | 12.60 | 12.53 | 12.41 | 12.46 | 12.37 | 12.36 | 12.34 | 12.29 |
| 40.91  | 12.60 | 12.47 | 12.43 | 12.53 | 12.42 | 12.36 | 12.33 | 12.38 | 12.28 | 12.19 | 12.14 |
| 43.43  | 12.24 | 12.27 | 12.24 | 12.18 | 12.14 | 12.06 | 12.02 | 12.00 | 11.96 | 11.92 | 11.95 |
| 46.13  | 12.30 | 12.34 | 12.30 | 12.32 | 12.19 | 12.21 | 12.12 | 12.10 | 12.05 | 11.99 | 12.00 |
| 49.01  | 12.74 | 12.78 | 12.79 | 12.75 | 12.63 | 12.61 | 12.53 | 12.57 | 12.45 | 12.46 | 12.48 |
| 52.09  | 12.52 | 12.57 | 12.45 | 12.48 | 12.36 | 12.36 | 12.32 | 12.38 | 12.28 | 12.30 | 12.18 |
| 55.39  | 12.39 | 12.32 | 12.43 | 12.30 | 12.25 | 12.28 | 12.18 | 12.26 | 12.13 | 12.10 | 12.07 |
| 58.91  | 12.38 | 12.33 | 12.36 | 12.31 | 12.32 | 12.29 | 12.12 | 12.13 | 12.13 | 12.05 | 11.92 |
| 62.68  | 12.52 | 12.48 | 12.49 | 12.41 | 12.47 | 12.36 | 12.37 | 12.32 | 12.25 | 12.31 | 12.18 |
| 66.70  | 12.52 | 12.50 | 12.46 | 12.42 | 12.42 | 12.37 | 12.38 | 12.32 | 12.27 | 12.28 | 12.26 |
| 71.00  | 12.60 | 12.54 | 12.58 | 12.55 | 12.49 | 12.46 | 12.49 | 12.43 | 12.33 | 12.28 | 12.26 |
| 75.60  | 12.46 | 12.47 | 12.41 | 12.43 | 12.36 | 12.37 | 12.24 | 12.16 | 12.20 | 12.22 | 12.12 |
| 80.51  | 12.60 | 12.59 | 12.61 | 12.59 | 12.45 | 12.48 | 12.40 | 12.35 | 12.33 | 12.31 | 12.25 |
| 85.77  | 12.93 | 12.87 | 12.97 | 12.86 | 12.76 | 12.75 | 12.71 | 12.73 | 12.63 | 12.63 | 12.55 |
| 91.38  | 12.83 | 12.79 | 12.73 | 12.70 | 12.78 | 12.66 | 12.60 | 12.61 | 12.56 | 12.46 | 12.52 |
| 97.39  | 12.73 | 12.75 | 12.61 | 12.70 | 12.54 | 12.64 | 12.49 | 12.48 | 12.34 | 12.40 | 12.36 |
| 103.80 | 13.06 | 13.06 | 13.07 | 12.99 | 12.96 | 12.93 | 12.89 | 12.90 | 12.84 | 12.75 | 12.68 |
| 110.66 | 12.73 | 12.68 | 12.58 | 12.56 | 12.56 | 12.48 | 12.45 | 12.37 | 12.44 | 12.41 | 12.38 |
| 117.99 | 12.81 | 12.75 | 12.68 | 12.66 | 12.69 | 12.53 | 12.55 | 12.48 | 12.53 | 12.45 | 12.39 |
| 125.83 | 13.01 | 12.94 | 12.94 | 12.85 | 12.83 | 12.77 | 12.74 | 12.72 | 12.57 | 12.64 | 12.68 |
| 134.21 | 12.83 | 12.78 | 12.79 | 12.70 | 12.76 | 12.68 | 12.67 | 12.61 | 12.49 | 12.51 | 12.49 |
| 143.17 | 12.82 | 12.75 | 12.79 | 12.77 | 12.74 | 12.66 | 12.67 | 12.63 | 12.59 | 12.51 | 12.48 |



|         |       |       |       |       |       |       |       |       |       |       |       |
|---------|-------|-------|-------|-------|-------|-------|-------|-------|-------|-------|-------|
| 152.74  | 12.97 | 12.80 | 12.91 | 12.76 | 12.74 | 12.73 | 12.78 | 12.74 | 12.67 | 12.64 | 12.55 |
| 162.97  | 12.96 | 13.01 | 13.02 | 12.98 | 12.91 | 12.85 | 12.82 | 12.83 | 12.80 | 12.76 | 12.76 |
| 173.91  | 12.93 | 12.87 | 12.93 | 12.85 | 12.94 | 12.82 | 12.76 | 12.64 | 12.68 | 12.65 | 12.59 |
| 185.60  | 13.11 | 13.19 | 13.14 | 13.11 | 13.10 | 12.99 | 12.93 | 12.92 | 12.87 | 12.85 | 12.80 |
| 198.10  | 12.96 | 13.02 | 13.03 | 12.98 | 12.94 | 12.88 | 12.81 | 12.84 | 12.80 | 12.77 | 12.72 |
| 211.46  | 13.17 | 13.13 | 13.13 | 13.08 | 13.04 | 13.02 | 12.94 | 12.98 | 12.92 | 12.90 | 12.84 |
| 225.75  | 13.18 | 13.16 | 13.23 | 13.10 | 13.03 | 13.01 | 12.94 | 13.00 | 12.93 | 12.92 | 12.86 |
| 241.01  | 13.10 | 13.01 | 12.99 | 13.05 | 12.97 | 12.85 | 12.87 | 12.83 | 12.85 | 12.74 | 12.76 |
| 257.33  | 13.19 | 13.19 | 13.09 | 13.19 | 13.04 | 13.04 | 12.97 | 12.97 | 12.96 | 12.90 | 12.89 |
| 274.77  | 13.36 | 13.33 | 13.31 | 13.22 | 13.23 | 13.18 | 13.13 | 13.06 | 13.14 | 12.97 | 12.98 |
| 293.42  | 13.32 | 13.24 | 13.20 | 13.23 | 13.18 | 13.08 | 13.04 | 13.05 | 13.08 | 12.99 | 12.95 |
| 313.35  | 13.15 | 13.10 | 13.06 | 13.09 | 13.07 | 12.94 | 12.97 | 12.91 | 12.90 | 12.73 | 12.76 |
| 334.66  | 13.47 | 13.39 | 13.31 | 13.45 | 13.31 | 13.26 | 13.25 | 13.17 | 13.11 | 13.16 | 13.11 |
| 357.43  | 13.31 | 13.35 | 13.35 | 13.29 | 13.22 | 13.17 | 13.20 | 13.12 | 13.20 | 13.05 | 13.01 |
| 381.78  | 13.02 | 13.01 | 12.95 | 12.92 | 12.94 | 12.89 | 12.87 | 12.82 | 12.77 | 12.73 | 12.69 |
| 407.80  | 13.01 | 13.14 | 13.02 | 13.02 | 12.94 | 12.97 | 12.91 | 12.84 | 12.80 | 12.78 | 12.65 |
| 435.62  | 13.39 | 13.37 | 13.36 | 13.30 | 13.31 | 13.17 | 13.14 | 13.12 | 13.15 | 13.00 | 12.97 |
| 465.35  | 13.13 | 13.17 | 13.17 | 13.10 | 13.13 | 13.00 | 12.97 | 12.93 | 12.94 | 12.92 | 12.84 |
| 497.14  | 13.15 | 13.20 | 13.21 | 13.11 | 13.00 | 13.03 | 12.93 | 12.91 | 12.90 | 12.91 | 12.90 |
| 531.11  | 12.98 | 12.95 | 12.94 | 12.84 | 12.90 | 12.79 | 12.78 | 12.76 | 12.70 | 12.65 | 12.59 |
| 567.43  | 13.32 | 13.28 | 13.28 | 13.18 | 13.19 | 13.12 | 13.12 | 13.12 | 12.95 | 12.95 | 12.93 |
| 606.26  | 13.31 | 13.29 | 13.35 | 13.23 | 13.14 | 13.16 | 13.09 | 12.97 | 12.99 | 12.94 | 12.94 |
| 647.76  | 13.16 | 13.16 | 13.13 | 13.07 | 13.09 | 12.95 | 12.90 | 12.89 | 12.84 | 12.75 | 12.75 |
| 692.12  | 12.76 | 12.77 | 12.75 | 12.71 | 12.63 | 12.58 | 12.66 | 12.56 | 12.50 | 12.49 | 12.48 |
| 739.53  | 13.16 | 13.14 | 13.06 | 13.04 | 13.08 | 12.94 | 12.89 | 12.89 | 12.80 | 12.80 | 12.82 |
| 790.22  | 13.06 | 13.11 | 13.10 | 12.98 | 12.94 | 12.82 | 12.92 | 12.86 | 12.84 | 12.73 | 12.68 |
| 844.40  | 13.06 | 13.01 | 13.05 | 12.95 | 13.04 | 12.92 | 12.83 | 12.83 | 12.77 | 12.72 | 12.63 |
| 902.32  | 13.07 | 13.06 | 13.11 | 12.93 | 13.01 | 12.90 | 12.86 | 12.87 | 12.82 | 12.70 | 12.73 |
| 964.23  | 12.87 | 12.80 | 12.83 | 12.72 | 12.69 | 12.64 | 12.69 | 12.57 | 12.53 | 12.44 | 12.43 |
| 1030.41 | 12.89 | 12.98 | 12.96 | 12.89 | 12.80 | 12.79 | 12.76 | 12.62 | 12.61 | 12.56 | 12.63 |
| 1101.15 | 13.00 | 12.85 | 12.94 | 12.94 | 12.82 | 12.76 | 12.59 | 12.65 | 12.57 | 12.63 | 12.53 |
| 1176.77 | 12.94 | 12.88 | 12.84 | 12.92 | 12.76 | 12.69 | 12.71 | 12.68 | 12.53 | 12.52 | 12.50 |
| 1257.60 | 12.99 | 12.89 | 12.89 | 12.87 | 12.72 | 12.76 | 12.67 | 12.58 | 12.52 | 12.61 | 12.51 |
| 1344.00 | 12.92 | 12.78 | 12.74 | 12.73 | 12.70 | 12.65 | 12.60 | 12.48 | 12.49 | 12.48 | 12.40 |
| 1436.36 | 12.67 | 12.64 | 12.58 | 12.64 | 12.51 | 12.43 | 12.44 | 12.45 | 12.34 | 12.34 | 12.30 |
| 1535.09 | 12.83 | 12.81 | 12.84 | 12.63 | 12.71 | 12.62 | 12.58 | 12.59 | 12.44 | 12.40 | 12.41 |
| 1640.63 | 12.74 | 12.61 | 12.75 | 12.64 | 12.61 | 12.52 | 12.50 | 12.52 | 12.35 | 12.36 | 12.17 |
| 1753.44 | 12.67 | 12.69 | 12.57 | 12.49 | 12.50 | 12.40 | 12.33 | 12.34 | 12.31 | 12.21 | 12.09 |
| 1874.02 | 12.68 | 12.67 | 12.58 | 12.50 | 12.50 | 12.37 | 12.44 | 12.32 | 12.28 | 12.28 | 12.12 |
| 2002.92 | 12.55 | 12.57 | 12.46 | 12.44 | 12.30 | 12.27 | 12.22 | 12.24 | 12.10 | 12.08 | 12.01 |
| 2140.71 | 12.32 | 12.24 | 12.20 | 12.20 | 12.10 | 12.05 | 11.97 | 12.03 | 11.96 | 11.89 | 11.83 |
| 2288.00 | 12.30 | 12.32 | 12.27 | 12.38 | 12.18 | 12.21 | 12.06 | 11.92 | 11.98 | 11.88 | 11.82 |
| 2445.44 | 12.29 | 12.23 | 12.18 | 12.18 | 12.16 | 12.19 | 12.01 | 12.01 | 11.92 | 11.83 | 11.80 |
| 2613.73 | 12.26 | 12.21 | 12.19 | 12.12 | 12.11 | 11.95 | 11.93 | 11.95 | 11.86 | 11.85 | 11.75 |
| 2793.63 | 12.01 | 12.01 | 11.90 | 11.92 | 11.81 | 11.72 | 11.69 | 11.64 | 11.63 | 11.45 | 11.43 |
| 2985.93 | 11.80 | 11.72 | 11.69 | 11.55 | 11.64 | 11.56 | 11.35 | 11.32 | 11.31 | 11.28 | 11.21 |
| 3191.49 | 11.73 | 11.67 | 11.58 | 11.54 | 11.53 | 11.50 | 11.41 | 11.30 | 11.21 | 11.14 | 11.06 |
| 3411.21 | 11.47 | 11.41 | 11.35 | 11.28 | 11.26 | 11.21 | 11.14 | 11.07 | 11.02 | 10.90 | 10.87 |
| 3646.09 | 11.42 | 11.21 | 11.28 | 11.24 | 11.18 | 11.02 | 11.03 | 10.99 | 10.90 | 10.87 | 10.81 |
| 3897.16 | 11.18 | 11.04 | 11.14 | 10.96 | 10.96 | 10.94 | 10.82 | 10.74 | 10.66 | 10.61 | 10.52 |

| Wavelength<br>(nm)<br>Time<br>(ps) | 600.39 | 601.81 | 603.24 | 604.66 | 606.08 | 607.51 | 608.93 | 610.36 | 611.78 | 613.20 | 614.63 |
|------------------------------------|--------|--------|--------|--------|--------|--------|--------|--------|--------|--------|--------|
| -2.74                              | -0.03  | 0.06   | -0.05  | 0.00   | -0.03  | 0.01   | 0.00   | 0.03   | 0.04   | 0.04   | 0.07   |
| -2.24                              | -0.03  | -0.07  | -0.13  | -0.10  | -0.14  | -0.13  | -0.10  | -0.13  | -0.04  | -0.12  | -0.05  |
| -1.74                              | 0.00   | -0.09  | -0.01  | -0.09  | -0.07  | 0.00   | 0.02   | 0.04   | -0.11  | 0.05   | -0.05  |
| -1.24                              | 0.04   | 0.04   | 0.08   | 0.15   | 0.07   | -0.01  | -0.01  | 0.01   | 0.06   | -0.05  | -0.01  |
| -0.74                              | 0.02   | 0.05   | 0.04   | 0.03   | 0.04   | -0.02  | 0.06   | 0.06   | 0.02   | 0.10   | 0.09   |
| -0.24                              | -0.05  | -0.09  | -0.02  | 0.01   | 0.03   | 0.02   | 0.04   | -0.01  | 0.05   | -0.03  | 0.06   |
| -0.14                              | 0.06   | 0.03   | 0.01   | -0.06  | 0.05   | 0.08   | -0.03  | 0.00   | 0.00   | 0.01   | 0.07   |
| -0.04                              | 0.00   | 0.06   | 0.07   | 0.06   | 0.04   | 0.05   | 0.02   | -0.01  | -0.02  | 0.01   | -0.18  |
| 0.06                               | 0.12   | -0.02  | -0.02  | 0.01   | -0.06  | 0.06   | -0.03  | 0.04   | 0.07   | 0.00   | 0.12   |
| 0.16                               | 0.08   | 0.02   | -0.05  | -0.07  | -0.02  | -0.07  | 0.08   | 0.00   | 0.01   | 0.08   | 0.07   |
| 0.26                               | 0.02   | -0.05  | -0.03  | 0.04   | -0.05  | -0.08  | -0.09  | 0.05   | -0.02  | -0.05  | 0.02   |
| 0.31                               | 0.02   | 0.01   | -0.05  | -0.03  | -0.06  | -0.08  | -0.07  | 0.01   | -0.02  | -0.13  | -0.03  |
| 0.36                               | 0.02   | 0.01   | -0.04  | 0.00   | -0.03  | -0.01  | 0.03   | -0.05  | 0.01   | 0.04   | 0.06   |
| 0.41                               | -0.07  | -0.02  | -0.01  | -0.07  | 0.04   | 0.01   | -0.07  | 0.09   | 0.07   | -0.05  | 0.00   |
| 0.46                               | 0.02   | -0.01  | -0.02  | -0.05  | 0.02   | -0.01  | 0.02   | 0.03   | -0.05  | 0.04   | 0.02   |
| 0.51                               | 0.05   | 0.00   | -0.07  | -0.05  | -0.02  | -0.02  | -0.07  | 0.00   | 0.06   | 0.10   | 0.03   |
| 0.56                               | -0.01  | -0.07  | -0.03  | 0.01   | -0.04  | 0.07   | 0.02   | 0.05   | 0.01   | 0.03   | 0.05   |
| 0.61                               | -0.03  | 0.06   | -0.04  | -0.03  | -0.01  | -0.03  | 0.00   | -0.04  | -0.02  | 0.01   | -0.05  |
| 0.66                               | 0.03   | 0.02   | 0.00   | 0.03   | -0.03  | -0.04  | 0.04   | 0.08   | 0.06   | 0.06   | 0.05   |
| 0.71                               | -0.01  | 0.05   | -0.07  | 0.00   | 0.04   | -0.05  | 0.01   | -0.03  | -0.06  | 0.04   | -0.03  |
| 0.76                               | -0.02  | -0.02  | 0.00   | -0.03  | -0.04  | -0.09  | -0.02  | -0.01  | 0.10   | 0.03   | -0.01  |
| 0.81                               | -0.07  | 0.06   | -0.01  | -0.01  | 0.04   | 0.11   | 0.03   | 0.09   | 0.01   | 0.07   | 0.08   |
| 0.86                               | 0.04   | -0.02  | -0.05  | 0.04   | 0.00   | 0.02   | 0.02   | 0.04   | -0.02  | 0.03   | 0.07   |
| 0.91                               | 0.08   | -0.05  | -0.01  | 0.05   | 0.05   | 0.05   | -0.01  | 0.08   | 0.12   | 0.08   | 0.08   |
| 0.96                               | 0.04   | -0.01  | -0.02  | -0.09  | 0.03   | -0.04  | -0.07  | 0.03   | -0.05  | 0.00   | 0.05   |
| 1.01                               | -0.11  | -0.06  | -0.09  | -0.11  | -0.12  | -0.07  | -0.06  | -0.03  | -0.03  | -0.02  | -0.02  |
| 1.06                               | 0.04   | 0.01   | 0.01   | 0.00   | -0.01  | 0.01   | 0.00   | 0.07   | 0.00   | -0.03  | 0.04   |
| 1.11                               | 0.05   | -0.08  | -0.08  | -0.09  | 0.03   | 0.05   | -0.07  | 0.10   | 0.06   | 0.03   | 0.10   |
| 1.16                               | -0.01  | 0.08   | -0.01  | -0.01  | -0.01  | -0.06  | -0.01  | 0.12   | -0.01  | 0.00   | 0.01   |
| 1.21                               | 0.00   | 0.10   | 0.03   | -0.01  | 0.02   | 0.13   | -0.07  | 0.05   | 0.06   | 0.10   | 0.11   |
| 1.26                               | 0.13   | 0.15   | -0.03  | -0.26  | -0.12  | -0.09  | 0.29   | 0.16   | -0.09  | -0.35  | -0.39  |
| 1.31                               | -0.24  | 0.07   | 0.21   | 0.05   | -0.23  | -0.54  | -0.82  | -0.70  | -0.60  | -0.40  | -0.41  |
| 1.36                               | 8.74   | 4.71   | 0.91   | -2.27  | -5.94  | -9.69  | -14.08 | -18.92 | -24.64 | -30.38 | -36.70 |
| 1.41                               | 162.52 | 160.54 | 157.60 | 155.48 | 152.97 | 151.60 | 150.48 | 150.19 | 149.06 | 148.51 | 147.49 |
| 1.46                               | -26.53 | -30.85 | -35.15 | -38.52 | -41.52 | -43.13 | -44.30 | -44.05 | -43.59 | -41.45 | -39.12 |
| 1.51                               | 20.03  | 20.07  | 20.14  | 20.21  | 20.45  | 20.69  | 20.81  | 21.08  | 21.06  | 21.13  | 21.21  |
| 1.56                               | 16.61  | 16.41  | 16.04  | 15.67  | 15.25  | 15.10  | 14.87  | 14.65  | 14.31  | 14.20  | 14.03  |
| 1.61                               | 14.90  | 15.18  | 15.54  | 15.76  | 15.99  | 16.27  | 16.55  | 16.67  | 16.67  | 16.57  | 16.51  |
| 1.66                               | 13.57  | 13.49  | 13.41  | 13.54  | 13.62  | 13.88  | 13.98  | 14.21  | 14.54  | 14.80  | 15.02  |
| 1.71                               | 14.71  | 14.85  | 14.95  | 15.02  | 15.02  | 14.97  | 14.81  | 14.79  | 14.69  | 14.42  | 14.26  |
| 1.76                               | 13.52  | 13.72  | 13.81  | 14.10  | 14.25  | 14.52  | 14.72  | 15.01  | 15.08  | 15.31  | 15.33  |
| 1.81                               | 12.98  | 12.83  | 12.60  | 12.45  | 12.41  | 12.28  | 12.33  | 12.36  | 12.34  | 12.48  | 12.65  |
| 1.86                               | 14.04  | 14.09  | 14.15  | 14.29  | 14.26  | 14.16  | 14.09  | 14.11  | 13.96  | 13.78  | 13.63  |
| 1.91                               | 12.08  | 12.23  | 12.34  | 12.46  | 12.63  | 12.86  | 13.11  | 13.33  | 13.51  | 13.71  | 13.94  |
| 1.96                               | 13.41  | 13.28  | 13.20  | 12.95  | 12.89  | 12.79  | 12.64  | 12.62  | 12.55  | 12.43  | 12.55  |
| 2.01                               | 13.23  | 13.32  | 13.42  | 13.68  | 13.74  | 13.83  | 14.04  | 14.12  | 14.10  | 14.04  | 14.04  |

|      |       |       |       |       |       |       |       |       |       |       |       |
|------|-------|-------|-------|-------|-------|-------|-------|-------|-------|-------|-------|
| 2.06 | 12.24 | 12.18 | 12.08 | 11.99 | 12.06 | 12.21 | 12.28 | 12.39 | 12.47 | 12.66 | 12.77 |
| 2.11 | 13.48 | 13.34 | 13.35 | 13.42 | 13.26 | 13.29 | 13.15 | 13.02 | 12.97 | 12.85 | 12.70 |
| 2.16 | 12.65 | 12.75 | 12.86 | 13.05 | 13.21 | 13.37 | 13.49 | 13.76 | 13.71 | 13.86 | 13.91 |
| 2.21 | 12.72 | 12.65 | 12.44 | 12.39 | 12.35 | 12.35 | 12.37 | 12.36 | 12.47 | 12.41 | 12.56 |
| 2.26 | 13.31 | 13.29 | 13.37 | 13.37 | 13.42 | 13.42 | 13.40 | 13.38 | 13.45 | 13.25 | 13.27 |
| 2.31 | 12.16 | 12.18 | 12.18 | 12.30 | 12.37 | 12.40 | 12.56 | 12.72 | 12.76 | 12.95 | 13.04 |
| 2.36 | 12.39 | 12.26 | 12.24 | 12.18 | 12.14 | 12.10 | 12.03 | 12.16 | 12.04 | 12.10 | 12.22 |
| 2.41 | 12.90 | 12.99 | 13.11 | 13.20 | 13.23 | 13.35 | 13.32 | 13.28 | 13.24 | 13.25 | 13.20 |
| 2.46 | 11.88 | 11.87 | 11.79 | 11.81 | 11.76 | 11.83 | 11.89 | 12.07 | 12.13 | 12.18 | 12.35 |
| 2.51 | 13.29 | 13.23 | 13.22 | 13.27 | 13.17 | 13.16 | 12.97 | 13.01 | 12.82 | 12.77 | 12.70 |
| 2.56 | 12.49 | 12.59 | 12.67 | 12.77 | 12.84 | 12.84 | 12.99 | 13.14 | 13.12 | 13.20 | 13.19 |
| 2.61 | 11.74 | 11.72 | 11.69 | 11.72 | 11.73 | 11.79 | 11.85 | 12.05 | 12.01 | 12.16 | 12.31 |
| 2.66 | 12.83 | 12.82 | 12.88 | 12.92 | 12.88 | 12.86 | 12.87 | 12.81 | 12.77 | 12.69 | 12.66 |
| 2.71 | 11.95 | 12.17 | 12.13 | 12.18 | 12.31 | 12.37 | 12.49 | 12.60 | 12.61 | 12.69 | 12.73 |
| 2.76 | 12.43 | 12.41 | 12.33 | 12.25 | 12.18 | 12.18 | 12.15 | 12.18 | 12.29 | 12.10 | 12.26 |
| 2.81 | 12.46 | 12.49 | 12.44 | 12.53 | 12.54 | 12.53 | 12.56 | 12.53 | 12.59 | 12.52 | 12.51 |
| 2.86 | 11.71 | 11.77 | 11.82 | 11.86 | 11.97 | 11.99 | 12.07 | 12.16 | 12.23 | 12.24 | 12.41 |
| 2.91 | 12.61 | 12.61 | 12.54 | 12.35 | 12.47 | 12.37 | 12.32 | 12.38 | 12.32 | 12.30 | 12.26 |
| 2.96 | 12.52 | 12.61 | 12.70 | 12.73 | 12.77 | 12.81 | 12.81 | 12.94 | 12.90 | 12.94 | 13.02 |
| 3.01 | 12.24 | 12.26 | 12.21 | 12.26 | 12.18 | 12.25 | 12.23 | 12.16 | 12.16 | 12.31 | 12.30 |
| 3.06 | 12.15 | 12.16 | 12.08 | 12.18 | 12.26 | 12.15 | 12.22 | 12.18 | 12.17 | 12.14 | 11.98 |
| 3.11 | 12.08 | 12.11 | 12.05 | 12.11 | 12.30 | 12.32 | 12.37 | 12.51 | 12.46 | 12.47 | 12.61 |
| 3.16 | 12.30 | 12.17 | 12.10 | 12.03 | 12.08 | 12.03 | 12.06 | 12.15 | 12.06 | 12.03 | 12.11 |
| 3.21 | 12.16 | 12.19 | 12.15 | 12.21 | 12.23 | 12.23 | 12.24 | 12.25 | 12.23 | 12.13 | 12.22 |
| 3.26 | 11.95 | 11.95 | 11.95 | 11.92 | 11.94 | 12.03 | 12.07 | 12.19 | 12.22 | 12.19 | 12.32 |
| 3.31 | 12.22 | 12.18 | 12.10 | 12.08 | 12.05 | 12.04 | 12.00 | 12.03 | 11.98 | 11.99 | 11.87 |
| 3.36 | 12.40 | 12.38 | 12.28 | 12.41 | 12.40 | 12.48 | 12.56 | 12.63 | 12.51 | 12.52 | 12.58 |
| 3.41 | 12.20 | 12.16 | 12.08 | 12.16 | 12.05 | 12.29 | 12.24 | 12.34 | 12.35 | 12.37 | 12.40 |
| 3.46 | 12.17 | 12.15 | 12.12 | 12.25 | 12.09 | 12.08 | 12.01 | 12.07 | 12.04 | 12.10 | 12.03 |
| 3.51 | 12.15 | 12.25 | 12.15 | 12.14 | 12.23 | 12.31 | 12.32 | 12.46 | 12.40 | 12.37 | 12.46 |
| 3.56 | 11.90 | 11.92 | 11.87 | 11.86 | 11.88 | 11.85 | 11.81 | 11.90 | 11.87 | 11.88 | 11.94 |
| 3.61 | 11.99 | 11.90 | 11.89 | 11.89 | 11.93 | 11.95 | 11.88 | 11.90 | 11.84 | 11.84 | 11.83 |
| 3.66 | 11.63 | 11.71 | 11.60 | 11.74 | 11.83 | 11.83 | 11.81 | 11.99 | 11.95 | 11.99 | 12.07 |
| 3.71 | 12.35 | 12.34 | 12.29 | 12.44 | 12.29 | 12.26 | 12.14 | 12.26 | 12.22 | 12.23 | 12.10 |
| 3.76 | 12.63 | 12.66 | 12.62 | 12.63 | 12.69 | 12.67 | 12.67 | 12.76 | 12.76 | 12.75 | 12.74 |
| 3.81 | 11.79 | 11.68 | 11.73 | 11.78 | 11.76 | 11.72 | 11.89 | 11.98 | 11.92 | 11.95 | 12.00 |
| 3.86 | 11.78 | 11.81 | 11.85 | 11.77 | 11.79 | 11.75 | 11.71 | 11.81 | 11.82 | 11.76 | 11.68 |
| 3.91 | 12.30 | 12.39 | 12.27 | 12.35 | 12.48 | 12.41 | 12.55 | 12.60 | 12.53 | 12.56 | 12.59 |
| 3.96 | 12.04 | 12.01 | 11.96 | 11.93 | 11.89 | 11.88 | 11.93 | 12.05 | 11.95 | 12.06 | 12.03 |
| 4.01 | 12.32 | 12.33 | 12.34 | 12.33 | 12.33 | 12.36 | 12.33 | 12.37 | 12.22 | 12.29 | 12.28 |
| 4.06 | 12.30 | 12.36 | 12.37 | 12.30 | 12.28 | 12.37 | 12.43 | 12.54 | 12.50 | 12.50 | 12.48 |
| 4.11 | 12.11 | 12.23 | 12.15 | 12.08 | 12.11 | 12.12 | 12.14 | 12.17 | 12.07 | 12.13 | 12.18 |
| 4.16 | 12.36 | 12.29 | 12.37 | 12.42 | 12.40 | 12.36 | 12.37 | 12.53 | 12.45 | 12.43 | 12.44 |
| 4.21 | 12.59 | 12.59 | 12.51 | 12.48 | 12.55 | 12.57 | 12.51 | 12.51 | 12.61 | 12.55 | 12.64 |
| 4.26 | 12.22 | 12.20 | 12.17 | 12.23 | 12.12 | 12.17 | 12.12 | 12.11 | 12.17 | 12.18 | 12.16 |
| 4.31 | 12.05 | 12.10 | 12.01 | 12.09 | 12.07 | 12.12 | 12.15 | 12.17 | 12.15 | 12.21 | 12.15 |
| 4.36 | 11.99 | 12.12 | 12.05 | 12.02 | 12.05 | 12.08 | 12.07 | 12.08 | 12.06 | 12.04 | 12.17 |
| 4.41 | 12.17 | 12.05 | 11.99 | 12.13 | 12.09 | 12.14 | 12.09 | 12.07 | 12.11 | 12.10 | 12.03 |
| 4.46 | 12.32 | 12.34 | 12.29 | 12.38 | 12.35 | 12.41 | 12.36 | 12.53 | 12.54 | 12.47 | 12.50 |
| 4.51 | 12.18 | 12.17 | 12.13 | 12.19 | 12.17 | 12.11 | 12.15 | 12.18 | 12.08 | 12.06 | 12.12 |

|       |       |       |       |       |       |       |       |       |       |       |       |
|-------|-------|-------|-------|-------|-------|-------|-------|-------|-------|-------|-------|
| 4.56  | 12.01 | 12.15 | 12.05 | 12.08 | 12.06 | 12.04 | 12.10 | 12.14 | 12.16 | 12.04 | 12.20 |
| 4.61  | 11.79 | 11.87 | 11.81 | 11.86 | 11.85 | 11.87 | 11.87 | 11.98 | 12.03 | 12.07 | 12.08 |
| 4.66  | 12.28 | 12.22 | 12.25 | 12.24 | 12.22 | 12.25 | 12.24 | 12.27 | 12.24 | 12.22 | 12.35 |
| 4.71  | 12.21 | 12.25 | 12.16 | 12.14 | 12.21 | 12.28 | 12.20 | 12.33 | 12.33 | 12.31 | 12.24 |
| 4.76  | 12.54 | 12.36 | 12.35 | 12.33 | 12.33 | 12.39 | 12.40 | 12.51 | 12.42 | 12.39 | 12.37 |
| 4.81  | 12.10 | 12.01 | 12.09 | 12.05 | 12.08 | 12.05 | 12.11 | 12.08 | 12.06 | 12.02 | 12.07 |
| 4.86  | 12.05 | 11.90 | 11.87 | 11.90 | 11.93 | 12.06 | 12.09 | 12.12 | 12.08 | 12.14 | 12.15 |
| 4.91  | 12.37 | 12.40 | 12.39 | 12.35 | 12.37 | 12.25 | 12.21 | 12.35 | 12.37 | 12.30 | 12.38 |
| 4.96  | 12.07 | 12.09 | 12.09 | 12.08 | 12.16 | 12.09 | 12.13 | 12.15 | 12.16 | 12.22 | 12.20 |
| 5.01  | 12.04 | 12.07 | 12.06 | 12.10 | 11.96 | 12.00 | 12.01 | 12.11 | 12.10 | 12.01 | 12.19 |
| 5.06  | 12.31 | 12.24 | 12.16 | 12.14 | 12.17 | 12.17 | 12.18 | 12.20 | 12.22 | 12.22 | 12.22 |
| 5.11  | 12.08 | 12.12 | 11.98 | 12.02 | 11.98 | 12.06 | 12.15 | 12.15 | 12.13 | 12.06 | 12.03 |
| 5.16  | 11.96 | 11.85 | 11.83 | 11.84 | 11.88 | 11.88 | 11.92 | 11.97 | 11.97 | 11.83 | 11.88 |
| 5.21  | 12.10 | 12.09 | 12.01 | 12.05 | 11.99 | 11.97 | 12.11 | 12.03 | 12.14 | 12.06 | 11.98 |
| 5.26  | 12.32 | 12.31 | 12.39 | 12.39 | 12.31 | 12.41 | 12.42 | 12.37 | 12.44 | 12.50 | 12.47 |
| 5.31  | 12.27 | 12.24 | 12.15 | 12.21 | 12.21 | 12.17 | 12.07 | 12.28 | 12.24 | 12.26 | 12.22 |
| 5.38  | 12.12 | 12.19 | 12.07 | 12.08 | 12.13 | 12.06 | 12.19 | 12.19 | 12.20 | 12.10 | 12.26 |
| 5.45  | 12.48 | 12.41 | 12.42 | 12.43 | 12.42 | 12.40 | 12.34 | 12.56 | 12.43 | 12.45 | 12.48 |
| 5.53  | 12.08 | 12.02 | 12.05 | 12.08 | 12.15 | 12.00 | 12.08 | 12.16 | 12.21 | 12.09 | 12.12 |
| 5.61  | 12.42 | 12.46 | 12.36 | 12.44 | 12.44 | 12.42 | 12.43 | 12.43 | 12.42 | 12.44 | 12.46 |
| 5.70  | 12.28 | 12.33 | 12.23 | 12.26 | 12.19 | 12.27 | 12.28 | 12.34 | 12.27 | 12.27 | 12.35 |
| 5.80  | 12.38 | 12.45 | 12.32 | 12.34 | 12.33 | 12.40 | 12.45 | 12.40 | 12.45 | 12.45 | 12.45 |
| 5.90  | 11.88 | 11.81 | 11.86 | 11.88 | 11.83 | 11.88 | 11.87 | 11.88 | 11.92 | 11.84 | 11.89 |
| 6.01  | 12.49 | 12.54 | 12.52 | 12.48 | 12.51 | 12.56 | 12.55 | 12.59 | 12.57 | 12.61 | 12.59 |
| 6.13  | 12.19 | 12.12 | 12.05 | 12.04 | 12.01 | 12.10 | 12.12 | 12.16 | 12.16 | 12.18 | 12.19 |
| 6.25  | 11.97 | 11.86 | 11.87 | 11.93 | 11.85 | 11.88 | 11.91 | 11.96 | 11.95 | 11.99 | 12.04 |
| 6.39  | 11.89 | 11.97 | 12.03 | 11.98 | 11.90 | 11.94 | 11.97 | 11.96 | 11.95 | 12.01 | 11.97 |
| 6.53  | 12.06 | 12.00 | 12.01 | 11.96 | 12.00 | 12.00 | 11.99 | 12.01 | 11.94 | 12.04 | 11.99 |
| 6.69  | 12.17 | 12.09 | 12.08 | 12.18 | 12.05 | 12.14 | 12.17 | 12.29 | 12.20 | 12.16 | 12.23 |
| 6.85  | 12.07 | 11.98 | 11.96 | 12.02 | 11.93 | 11.92 | 11.96 | 12.11 | 11.95 | 12.03 | 12.08 |
| 7.03  | 12.15 | 12.04 | 12.06 | 12.01 | 12.08 | 12.10 | 12.01 | 12.07 | 12.11 | 12.02 | 12.12 |
| 7.21  | 12.19 | 12.09 | 12.07 | 12.09 | 12.20 | 12.17 | 12.15 | 12.11 | 12.16 | 12.14 | 12.13 |
| 7.41  | 12.18 | 12.21 | 12.04 | 12.09 | 12.12 | 12.18 | 12.21 | 12.30 | 12.26 | 12.24 | 12.12 |
| 7.63  | 12.51 | 12.53 | 12.42 | 12.56 | 12.60 | 12.52 | 12.46 | 12.51 | 12.53 | 12.48 | 12.58 |
| 7.86  | 12.13 | 12.06 | 12.10 | 11.97 | 12.01 | 12.07 | 12.17 | 12.14 | 12.16 | 12.11 | 12.13 |
| 8.10  | 12.22 | 12.19 | 12.05 | 12.09 | 12.03 | 12.09 | 12.21 | 12.17 | 12.11 | 12.13 | 12.16 |
| 8.36  | 11.70 | 11.78 | 11.82 | 11.73 | 11.76 | 11.65 | 11.72 | 11.76 | 11.74 | 11.73 | 11.83 |
| 8.64  | 12.09 | 12.05 | 12.06 | 12.07 | 12.02 | 12.03 | 12.05 | 12.08 | 12.12 | 12.00 | 12.06 |
| 8.94  | 12.32 | 12.24 | 12.24 | 12.23 | 12.19 | 12.25 | 12.30 | 12.25 | 12.31 | 12.18 | 12.42 |
| 9.26  | 12.57 | 12.56 | 12.51 | 12.46 | 12.58 | 12.57 | 12.55 | 12.66 | 12.59 | 12.57 | 12.58 |
| 9.60  | 12.18 | 12.21 | 12.23 | 12.12 | 12.14 | 12.18 | 12.13 | 12.23 | 12.22 | 12.11 | 12.13 |
| 9.97  | 12.18 | 12.17 | 12.17 | 12.19 | 12.16 | 12.18 | 12.21 | 12.15 | 12.18 | 12.18 | 12.09 |
| 10.36 | 12.29 | 12.31 | 12.27 | 12.30 | 12.37 | 12.32 | 12.27 | 12.32 | 12.25 | 12.32 | 12.37 |
| 10.77 | 12.37 | 12.31 | 12.26 | 12.28 | 12.23 | 12.20 | 12.28 | 12.28 | 12.28 | 12.35 | 12.28 |
| 11.22 | 12.10 | 12.10 | 12.04 | 11.98 | 11.96 | 11.97 | 12.09 | 12.04 | 12.07 | 11.97 | 11.99 |
| 11.70 | 12.31 | 12.23 | 12.17 | 12.27 | 12.26 | 12.20 | 12.17 | 12.29 | 12.28 | 12.30 | 12.29 |
| 12.21 | 11.88 | 11.85 | 11.87 | 11.85 | 11.82 | 11.89 | 11.85 | 11.92 | 11.84 | 11.86 | 11.92 |
| 12.75 | 12.23 | 12.33 | 12.22 | 12.19 | 12.16 | 12.17 | 12.25 | 12.33 | 12.21 | 12.15 | 12.26 |
| 13.33 | 12.29 | 12.38 | 12.26 | 12.25 | 12.26 | 12.20 | 12.21 | 12.29 | 12.25 | 12.30 | 12.20 |
| 13.95 | 12.18 | 12.11 | 12.09 | 12.13 | 12.19 | 12.05 | 12.18 | 12.18 | 12.12 | 12.09 | 12.10 |

|        |       |       |       |       |       |       |       |       |       |       |       |
|--------|-------|-------|-------|-------|-------|-------|-------|-------|-------|-------|-------|
| 14.62  | 11.98 | 11.98 | 11.87 | 11.98 | 11.91 | 11.89 | 11.93 | 11.91 | 11.96 | 11.89 | 11.99 |
| 15.33  | 11.94 | 12.00 | 11.85 | 11.91 | 11.86 | 11.88 | 11.82 | 11.83 | 11.85 | 11.79 | 11.85 |
| 16.09  | 11.99 | 11.97 | 11.86 | 11.96 | 11.92 | 11.91 | 11.91 | 12.02 | 12.01 | 11.90 | 11.97 |
| 16.90  | 12.26 | 12.26 | 12.12 | 12.14 | 12.14 | 12.12 | 12.19 | 12.13 | 12.13 | 12.13 | 12.19 |
| 17.77  | 11.97 | 11.97 | 12.00 | 11.98 | 11.93 | 11.99 | 11.96 | 12.01 | 11.88 | 11.95 | 11.94 |
| 18.70  | 11.93 | 11.97 | 11.87 | 11.99 | 11.91 | 11.87 | 11.91 | 11.96 | 11.90 | 11.87 | 11.80 |
| 19.69  | 12.19 | 12.08 | 12.06 | 12.09 | 12.03 | 12.16 | 12.11 | 12.07 | 12.04 | 12.01 | 12.07 |
| 20.75  | 11.98 | 11.88 | 11.92 | 11.92 | 11.84 | 12.03 | 11.97 | 11.99 | 11.96 | 11.93 | 11.89 |
| 21.89  | 12.37 | 12.35 | 12.28 | 12.28 | 12.21 | 12.28 | 12.34 | 12.29 | 12.32 | 12.19 | 12.22 |
| 23.10  | 12.53 | 12.48 | 12.52 | 12.53 | 12.43 | 12.44 | 12.47 | 12.54 | 12.47 | 12.38 | 12.43 |
| 24.39  | 11.93 | 12.06 | 11.93 | 11.99 | 11.92 | 12.02 | 11.98 | 11.98 | 11.97 | 11.99 | 12.05 |
| 25.78  | 12.31 | 12.36 | 12.21 | 12.25 | 12.25 | 12.27 | 12.23 | 12.26 | 12.26 | 12.21 | 12.17 |
| 27.26  | 12.21 | 12.18 | 12.11 | 12.13 | 12.04 | 12.06 | 12.19 | 12.12 | 12.16 | 12.07 | 12.11 |
| 28.84  | 12.25 | 12.18 | 12.18 | 12.12 | 12.12 | 12.20 | 12.14 | 12.11 | 12.17 | 12.12 | 12.12 |
| 30.53  | 12.29 | 12.27 | 12.15 | 12.15 | 12.16 | 12.30 | 12.13 | 12.21 | 12.23 | 12.21 | 12.18 |
| 32.34  | 12.00 | 12.01 | 11.97 | 12.02 | 12.01 | 11.98 | 11.91 | 12.00 | 11.99 | 11.85 | 11.90 |
| 34.27  | 12.34 | 12.18 | 12.24 | 12.22 | 12.12 | 12.20 | 12.27 | 12.27 | 12.28 | 12.18 | 12.19 |
| 36.34  | 12.08 | 12.03 | 11.91 | 11.99 | 11.98 | 12.02 | 12.02 | 12.07 | 12.07 | 11.99 | 12.01 |
| 38.55  | 12.30 | 12.23 | 12.23 | 12.24 | 12.13 | 12.22 | 12.22 | 12.35 | 12.25 | 12.22 | 12.29 |
| 40.91  | 12.09 | 12.08 | 12.04 | 12.06 | 12.12 | 12.02 | 12.11 | 12.09 | 12.04 | 11.99 | 12.10 |
| 43.43  | 11.93 | 11.86 | 11.85 | 11.94 | 11.84 | 11.82 | 11.76 | 11.79 | 11.73 | 11.77 | 11.75 |
| 46.13  | 11.94 | 11.94 | 11.94 | 11.91 | 11.82 | 11.92 | 11.92 | 12.02 | 11.96 | 11.91 | 11.89 |
| 49.01  | 12.44 | 12.40 | 12.25 | 12.26 | 12.29 | 12.33 | 12.35 | 12.37 | 12.48 | 12.29 | 12.27 |
| 52.09  | 12.11 | 12.26 | 12.14 | 12.10 | 12.08 | 12.06 | 12.10 | 12.07 | 12.14 | 12.04 | 12.10 |
| 55.39  | 12.07 | 12.09 | 11.88 | 11.94 | 11.97 | 11.99 | 12.10 | 12.05 | 11.97 | 11.92 | 11.90 |
| 58.91  | 11.98 | 12.01 | 12.00 | 11.96 | 11.92 | 11.94 | 11.87 | 12.04 | 11.97 | 11.98 | 12.03 |
| 62.68  | 12.20 | 12.17 | 12.12 | 12.20 | 12.10 | 12.05 | 12.12 | 12.09 | 12.23 | 12.15 | 12.12 |
| 66.70  | 12.17 | 12.16 | 12.18 | 12.17 | 12.16 | 12.12 | 12.19 | 12.23 | 12.21 | 12.21 | 12.10 |
| 71.00  | 12.22 | 12.19 | 12.16 | 12.22 | 12.17 | 12.11 | 12.22 | 12.18 | 12.17 | 12.13 | 12.10 |
| 75.60  | 12.13 | 12.06 | 12.06 | 12.10 | 12.02 | 12.09 | 12.07 | 12.11 | 12.10 | 12.00 | 12.06 |
| 80.51  | 12.25 | 12.26 | 12.20 | 12.14 | 12.20 | 12.18 | 12.17 | 12.24 | 12.20 | 12.21 | 12.16 |
| 85.77  | 12.53 | 12.57 | 12.47 | 12.53 | 12.53 | 12.53 | 12.50 | 12.37 | 12.42 | 12.37 | 12.45 |
| 91.38  | 12.55 | 12.43 | 12.33 | 12.37 | 12.40 | 12.42 | 12.43 | 12.44 | 12.47 | 12.39 | 12.42 |
| 97.39  | 12.34 | 12.26 | 12.26 | 12.28 | 12.22 | 12.32 | 12.27 | 12.21 | 12.31 | 12.20 | 12.19 |
| 103.80 | 12.71 | 12.67 | 12.67 | 12.67 | 12.72 | 12.72 | 12.71 | 12.62 | 12.71 | 12.67 | 12.59 |
| 110.66 | 12.36 | 12.39 | 12.24 | 12.26 | 12.28 | 12.27 | 12.31 | 12.39 | 12.28 | 12.31 | 12.32 |
| 117.99 | 12.41 | 12.35 | 12.34 | 12.26 | 12.28 | 12.26 | 12.33 | 12.31 | 12.31 | 12.23 | 12.31 |
| 125.83 | 12.60 | 12.69 | 12.62 | 12.55 | 12.49 | 12.56 | 12.58 | 12.56 | 12.49 | 12.59 | 12.57 |
| 134.21 | 12.44 | 12.38 | 12.42 | 12.40 | 12.45 | 12.35 | 12.36 | 12.42 | 12.39 | 12.34 | 12.36 |
| 143.17 | 12.57 | 12.49 | 12.51 | 12.42 | 12.48 | 12.50 | 12.42 | 12.42 | 12.47 | 12.37 | 12.42 |
| 152.74 | 12.53 | 12.54 | 12.41 | 12.52 | 12.42 | 12.51 | 12.43 | 12.54 | 12.52 | 12.42 | 12.50 |
| 162.97 | 12.68 | 12.65 | 12.62 | 12.62 | 12.56 | 12.59 | 12.61 | 12.58 | 12.62 | 12.55 | 12.54 |
| 173.91 | 12.52 | 12.63 | 12.47 | 12.52 | 12.52 | 12.52 | 12.50 | 12.60 | 12.51 | 12.54 | 12.54 |
| 185.60 | 12.75 | 12.82 | 12.78 | 12.71 | 12.73 | 12.67 | 12.70 | 12.68 | 12.74 | 12.68 | 12.67 |
| 198.10 | 12.63 | 12.63 | 12.59 | 12.68 | 12.58 | 12.66 | 12.57 | 12.65 | 12.63 | 12.57 | 12.56 |
| 211.46 | 12.90 | 12.79 | 12.73 | 12.82 | 12.73 | 12.79 | 12.78 | 12.82 | 12.78 | 12.71 | 12.73 |
| 225.75 | 12.86 | 12.82 | 12.76 | 12.77 | 12.72 | 12.78 | 12.71 | 12.74 | 12.80 | 12.72 | 12.66 |
| 241.01 | 12.67 | 12.84 | 12.67 | 12.58 | 12.65 | 12.68 | 12.56 | 12.68 | 12.61 | 12.56 | 12.65 |
| 257.33 | 12.88 | 12.85 | 12.82 | 12.75 | 12.76 | 12.81 | 12.81 | 12.77 | 12.79 | 12.71 | 12.78 |
| 274.77 | 13.05 | 13.02 | 12.93 | 12.92 | 12.87 | 12.93 | 12.87 | 12.96 | 12.82 | 12.75 | 12.77 |

|                    |        |        |        |        |        |        |        |        |        |        |        |
|--------------------|--------|--------|--------|--------|--------|--------|--------|--------|--------|--------|--------|
| 293.42             | 13.03  | 12.91  | 12.88  | 12.94  | 12.81  | 12.87  | 12.84  | 12.99  | 12.85  | 12.82  | 12.84  |
| 313.35             | 12.84  | 12.82  | 12.66  | 12.71  | 12.67  | 12.71  | 12.69  | 12.71  | 12.58  | 12.57  | 12.60  |
| 334.66             | 13.11  | 13.02  | 13.04  | 12.93  | 12.95  | 13.02  | 12.96  | 13.01  | 12.93  | 12.85  | 12.79  |
| 357.43             | 12.92  | 12.95  | 12.93  | 12.89  | 12.86  | 12.85  | 12.87  | 12.99  | 12.90  | 12.95  | 12.81  |
| 381.78             | 12.68  | 12.65  | 12.51  | 12.63  | 12.52  | 12.66  | 12.53  | 12.65  | 12.59  | 12.53  | 12.62  |
| 407.80             | 12.75  | 12.75  | 12.70  | 12.63  | 12.67  | 12.67  | 12.63  | 12.67  | 12.63  | 12.63  | 12.59  |
| 435.62             | 12.92  | 13.00  | 12.93  | 12.91  | 12.86  | 12.87  | 12.85  | 12.93  | 12.84  | 12.81  | 12.75  |
| 465.35             | 12.87  | 12.85  | 12.84  | 12.84  | 12.69  | 12.85  | 12.84  | 12.74  | 12.78  | 12.66  | 12.76  |
| 497.14             | 12.83  | 12.86  | 12.80  | 12.81  | 12.70  | 12.72  | 12.82  | 12.69  | 12.75  | 12.67  | 12.65  |
| 531.11             | 12.55  | 12.50  | 12.60  | 12.55  | 12.47  | 12.49  | 12.46  | 12.46  | 12.45  | 12.49  | 12.48  |
| 567.43             | 12.91  | 12.83  | 12.93  | 12.77  | 12.69  | 12.76  | 12.79  | 12.75  | 12.69  | 12.68  | 12.81  |
| 606.26             | 12.91  | 12.92  | 12.90  | 12.76  | 12.82  | 12.85  | 12.79  | 12.82  | 12.73  | 12.71  | 12.66  |
| 647.76             | 12.73  | 12.68  | 12.65  | 12.65  | 12.57  | 12.65  | 12.65  | 12.74  | 12.66  | 12.58  | 12.59  |
| 692.12             | 12.46  | 12.39  | 12.27  | 12.31  | 12.37  | 12.31  | 12.32  | 12.34  | 12.26  | 12.16  | 12.29  |
| 739.53             | 12.84  | 12.73  | 12.66  | 12.64  | 12.68  | 12.73  | 12.60  | 12.62  | 12.58  | 12.54  | 12.49  |
| 790.22             | 12.72  | 12.70  | 12.61  | 12.59  | 12.47  | 12.55  | 12.51  | 12.54  | 12.41  | 12.50  | 12.33  |
| 844.40             | 12.68  | 12.62  | 12.60  | 12.70  | 12.53  | 12.54  | 12.44  | 12.53  | 12.53  | 12.46  | 12.44  |
| 902.32             | 12.61  | 12.59  | 12.53  | 12.50  | 12.56  | 12.55  | 12.51  | 12.51  | 12.52  | 12.46  | 12.39  |
| 964.23             | 12.35  | 12.45  | 12.31  | 12.36  | 12.26  | 12.26  | 12.20  | 12.30  | 12.19  | 12.21  | 12.16  |
| 1030.41            | 12.50  | 12.45  | 12.40  | 12.53  | 12.44  | 12.33  | 12.41  | 12.45  | 12.37  | 12.31  | 12.31  |
| 1101.15            | 12.51  | 12.49  | 12.46  | 12.36  | 12.37  | 12.32  | 12.28  | 12.28  | 12.27  | 12.25  | 12.24  |
| 1176.77            | 12.53  | 12.50  | 12.36  | 12.37  | 12.28  | 12.32  | 12.20  | 12.32  | 12.25  | 12.25  | 12.19  |
| 1257.60            | 12.37  | 12.45  | 12.35  | 12.35  | 12.39  | 12.36  | 12.29  | 12.24  | 12.19  | 12.19  | 12.15  |
| 1344.00            | 12.31  | 12.34  | 12.27  | 12.27  | 12.17  | 12.24  | 12.23  | 12.26  | 12.21  | 12.18  | 12.05  |
| 1436.36            | 12.35  | 12.25  | 12.09  | 12.13  | 12.10  | 12.07  | 12.03  | 12.10  | 12.09  | 12.01  | 11.90  |
| 1535.09            | 12.36  | 12.37  | 12.25  | 12.24  | 12.27  | 12.14  | 12.16  | 12.18  | 12.22  | 12.18  | 12.04  |
| 1640.63            | 12.19  | 12.22  | 12.08  | 12.10  | 12.12  | 12.10  | 12.13  | 12.03  | 12.05  | 11.89  | 11.93  |
| 1753.44            | 12.15  | 12.18  | 12.05  | 12.06  | 12.07  | 12.05  | 12.03  | 12.04  | 11.94  | 11.92  | 11.91  |
| 1874.02            | 12.15  | 12.13  | 11.98  | 11.95  | 11.95  | 11.90  | 11.87  | 11.90  | 11.87  | 11.84  | 11.82  |
| 2002.92            | 11.97  | 11.99  | 11.90  | 11.86  | 11.87  | 11.91  | 11.91  | 11.90  | 11.83  | 11.76  | 11.83  |
| 2140.71            | 11.81  | 11.78  | 11.76  | 11.71  | 11.67  | 11.75  | 11.63  | 11.70  | 11.71  | 11.65  | 11.66  |
| 2288.00            | 11.80  | 11.83  | 11.77  | 11.70  | 11.71  | 11.61  | 11.70  | 11.62  | 11.56  | 11.58  | 11.51  |
| 2445.44            | 11.83  | 11.75  | 11.55  | 11.65  | 11.49  | 11.58  | 11.58  | 11.52  | 11.57  | 11.45  | 11.45  |
| 2613.73            | 11.68  | 11.68  | 11.61  | 11.64  | 11.63  | 11.51  | 11.54  | 11.58  | 11.51  | 11.53  | 11.37  |
| 2793.63            | 11.41  | 11.41  | 11.34  | 11.22  | 11.26  | 11.25  | 11.16  | 11.18  | 11.15  | 11.15  | 11.15  |
| 2985.93            | 11.19  | 11.15  | 11.00  | 11.03  | 11.06  | 10.97  | 10.93  | 11.04  | 10.99  | 10.87  | 10.84  |
| 3191.49            | 11.08  | 11.05  | 10.94  | 10.97  | 10.94  | 10.90  | 10.86  | 10.87  | 10.76  | 10.79  | 10.78  |
| 3411.21            | 10.87  | 10.86  | 10.75  | 10.70  | 10.62  | 10.72  | 10.61  | 10.67  | 10.62  | 10.52  | 10.51  |
| 3646.09            | 10.74  | 10.68  | 10.64  | 10.61  | 10.64  | 10.51  | 10.49  | 10.48  | 10.47  | 10.38  | 10.45  |
| 3897.16            | 10.39  | 10.45  | 10.39  | 10.30  | 10.31  | 10.29  | 10.26  | 10.28  | 10.26  | 10.20  | 10.25  |
| Wavelength<br>(nm) | 616.05 | 617.48 | 618.90 | 620.32 | 621.75 | 623.17 | 624.60 | 626.02 | 627.44 | 628.87 | 630.29 |
| Time<br>(ps)       |        |        |        |        |        |        |        |        |        |        |        |
| -2.74              | 0.03   | 0.11   | 0.06   | 0.03   | 0.00   | 0.04   | 0.06   | 0.04   | 0.05   | -0.02  | 0.15   |
| -2.24              | -0.07  | -0.10  | -0.04  | 0.01   | -0.04  | 0.01   | 0.00   | 0.03   | -0.04  | 0.01   | -0.01  |
| -1.74              | -0.04  | 0.08   | -0.10  | 0.02   | 0.05   | -0.01  | 0.02   | -0.08  | 0.09   | 0.00   | -0.01  |
| -1.24              | 0.02   | -0.01  | 0.02   | -0.01  | 0.03   | -0.02  | -0.02  | 0.00   | 0.05   | -0.01  | -0.12  |
| -0.74              | 0.10   | 0.06   | 0.09   | -0.02  | 0.11   | 0.07   | 0.11   | 0.13   | -0.04  | 0.07   | -0.03  |
| -0.24              | 0.02   | 0.03   | -0.04  | -0.03  | -0.02  | -0.03  | -0.09  | -0.11  | -0.04  | 0.00   | -0.01  |

|       |        |        |        |        |        |        |        |        |        |        |        |
|-------|--------|--------|--------|--------|--------|--------|--------|--------|--------|--------|--------|
| -0.14 | 0.11   | 0.00   | 0.05   | 0.04   | -0.03  | -0.03  | -0.04  | -0.01  | -0.04  | 0.03   | -0.05  |
| -0.04 | -0.16  | -0.17  | -0.05  | -0.05  | -0.10  | -0.03  | -0.04  | 0.00   | -0.04  | -0.08  | 0.08   |
| 0.06  | -0.03  | -0.01  | 0.07   | 0.03   | 0.00   | 0.00   | -0.08  | 0.04   | 0.13   | 0.09   | -0.01  |
| 0.16  | 0.07   | 0.11   | 0.09   | 0.07   | 0.15   | 0.18   | 0.03   | 0.20   | 0.14   | 0.20   | 0.13   |
| 0.26  | 0.01   | 0.09   | -0.05  | 0.09   | 0.01   | 0.04   | -0.01  | 0.10   | 0.02   | 0.07   | 0.08   |
| 0.31  | -0.01  | -0.09  | -0.07  | -0.03  | 0.03   | -0.04  | -0.03  | -0.02  | -0.05  | 0.10   | 0.09   |
| 0.36  | 0.04   | 0.07   | 0.02   | 0.10   | 0.05   | -0.10  | -0.01  | 0.05   | -0.05  | -0.05  | -0.02  |
| 0.41  | 0.00   | -0.13  | 0.01   | 0.03   | 0.06   | -0.09  | 0.12   | 0.03   | 0.11   | 0.09   | -0.09  |
| 0.46  | -0.10  | -0.03  | 0.01   | 0.02   | -0.02  | -0.09  | 0.03   | -0.02  | 0.05   | 0.10   | 0.00   |
| 0.51  | 0.00   | -0.04  | 0.01   | -0.01  | 0.02   | 0.00   | 0.09   | 0.05   | -0.08  | 0.03   | -0.01  |
| 0.56  | 0.02   | 0.04   | 0.00   | 0.14   | -0.01  | 0.07   | 0.02   | 0.12   | 0.03   | 0.13   | -0.01  |
| 0.61  | 0.04   | 0.10   | 0.05   | 0.12   | 0.00   | 0.02   | 0.10   | 0.13   | 0.01   | 0.10   | 0.04   |
| 0.66  | 0.09   | 0.14   | 0.09   | 0.03   | -0.06  | -0.05  | 0.13   | 0.14   | 0.06   | 0.06   | 0.08   |
| 0.71  | -0.04  | 0.03   | -0.04  | 0.09   | 0.13   | 0.04   | 0.07   | 0.09   | 0.09   | 0.17   | 0.13   |
| 0.76  | 0.10   | 0.06   | 0.03   | 0.03   | 0.08   | 0.07   | 0.09   | 0.11   | 0.15   | 0.05   | 0.09   |
| 0.81  | 0.06   | 0.12   | 0.06   | 0.15   | 0.07   | 0.17   | 0.12   | 0.16   | 0.11   | 0.13   | 0.18   |
| 0.86  | -0.10  | -0.02  | -0.08  | -0.01  | 0.05   | 0.07   | 0.03   | 0.01   | 0.01   | 0.09   | 0.01   |
| 0.91  | 0.01   | 0.10   | 0.04   | 0.14   | 0.05   | 0.11   | 0.04   | 0.07   | 0.11   | 0.13   | 0.09   |
| 0.96  | -0.01  | -0.02  | 0.02   | 0.03   | 0.04   | 0.10   | 0.08   | 0.10   | 0.05   | 0.09   | 0.07   |
| 1.01  | 0.02   | 0.00   | -0.07  | -0.02  | 0.05   | 0.06   | 0.09   | -0.01  | -0.02  | 0.09   | 0.07   |
| 1.06  | -0.07  | -0.01  | -0.01  | 0.08   | 0.07   | -0.03  | 0.07   | 0.03   | 0.00   | 0.13   | 0.01   |
| 1.11  | -0.02  | 0.05   | 0.09   | -0.04  | 0.02   | 0.18   | 0.13   | -0.01  | 0.18   | 0.14   | -0.04  |
| 1.16  | 0.07   | 0.02   | 0.02   | 0.03   | 0.06   | -0.06  | 0.18   | 0.05   | 0.15   | 0.13   | 0.13   |
| 1.21  | -0.11  | -0.01  | 0.07   | 0.13   | 0.00   | -0.09  | 0.04   | 0.24   | 0.22   | 0.13   | -0.04  |
| 1.26  | -0.19  | 0.11   | 0.26   | 0.11   | -0.19  | -0.33  | -0.32  | -0.04  | 0.28   | 0.38   | 0.13   |
| 1.31  | -0.64  | -0.99  | -1.45  | -1.81  | -1.84  | -1.67  | -0.87  | -0.04  | 0.76   | 1.35   | 1.42   |
| 1.36  | -43.15 | -48.82 | -53.69 | -57.62 | -60.24 | -61.39 | -60.73 | -58.58 | -54.84 | -50.32 | -45.03 |
| 1.41  | 143.78 | 141.36 | 137.64 | 132.51 | 126.42 | 119.83 | 113.07 | 106.12 | 99.46  | 93.23  | 87.61  |
| 1.46  | -36.00 | -31.76 | -27.05 | -21.68 | -16.09 | -10.25 | -4.04  | 2.42   | 8.75   | 15.47  | 22.04  |
| 1.51  | 21.12  | 21.16  | 21.28  | 21.33  | 21.36  | 21.39  | 21.48  | 21.47  | 21.36  | 21.17  | 20.68  |
| 1.56  | 14.02  | 14.23  | 14.29  | 14.38  | 14.45  | 14.81  | 15.14  | 15.61  | 16.08  | 16.50  | 17.04  |
| 1.61  | 16.44  | 16.50  | 16.27  | 15.94  | 15.66  | 15.59  | 15.53  | 15.26  | 14.78  | 14.46  | 14.28  |
| 1.66  | 15.19  | 15.51  | 15.82  | 16.07  | 16.32  | 16.58  | 16.78  | 16.88  | 17.08  | 17.23  | 17.15  |
| 1.71  | 13.98  | 13.80  | 13.63  | 13.54  | 13.37  | 13.21  | 13.09  | 13.07  | 12.98  | 13.08  | 13.16  |
| 1.76  | 15.40  | 15.62  | 15.67  | 15.70  | 15.60  | 15.57  | 15.51  | 15.37  | 15.16  | 14.94  | 14.85  |
| 1.81  | 12.63  | 12.86  | 13.15  | 13.44  | 13.58  | 13.87  | 14.08  | 14.40  | 14.55  | 14.92  | 15.14  |
| 1.86  | 13.38  | 13.26  | 13.13  | 13.14  | 12.85  | 12.76  | 12.70  | 12.66  | 12.55  | 12.62  | 12.63  |
| 1.91  | 13.95  | 14.26  | 14.26  | 14.57  | 14.66  | 14.74  | 14.72  | 14.72  | 14.62  | 14.68  | 14.68  |
| 1.96  | 12.33  | 12.49  | 12.49  | 12.61  | 12.68  | 12.84  | 13.09  | 13.25  | 13.46  | 13.72  | 13.83  |
| 2.01  | 13.80  | 13.89  | 13.75  | 13.57  | 13.32  | 13.30  | 13.15  | 12.98  | 12.74  | 12.56  | 12.33  |
| 2.06  | 12.89  | 13.12  | 13.38  | 13.62  | 13.77  | 14.00  | 14.17  | 14.37  | 14.47  | 14.63  | 14.81  |
| 2.11  | 12.47  | 12.44  | 12.45  | 12.47  | 12.43  | 12.42  | 12.43  | 12.52  | 12.61  | 12.74  | 12.93  |
| 2.16  | 13.84  | 13.91  | 13.94  | 13.99  | 13.90  | 13.85  | 13.77  | 13.74  | 13.61  | 13.61  | 13.45  |
| 2.21  | 12.62  | 12.79  | 12.89  | 13.09  | 13.29  | 13.42  | 13.61  | 13.76  | 13.95  | 14.23  | 14.30  |
| 2.26  | 13.07  | 13.01  | 13.00  | 12.95  | 12.77  | 12.64  | 12.62  | 12.65  | 12.57  | 12.59  | 12.62  |
| 2.31  | 12.99  | 13.25  | 13.36  | 13.48  | 13.54  | 13.53  | 13.59  | 13.60  | 13.65  | 13.58  | 13.53  |
| 2.36  | 12.15  | 12.28  | 12.42  | 12.57  | 12.59  | 12.75  | 12.93  | 13.06  | 13.17  | 13.40  | 13.35  |
| 2.41  | 13.12  | 13.05  | 12.97  | 12.93  | 12.85  | 12.74  | 12.72  | 12.59  | 12.50  | 12.44  | 12.38  |
| 2.46  | 12.40  | 12.61  | 12.78  | 12.85  | 12.94  | 13.06  | 13.21  | 13.32  | 13.33  | 13.41  | 13.39  |
| 2.51  | 12.52  | 12.59  | 12.46  | 12.49  | 12.32  | 12.38  | 12.37  | 12.43  | 12.43  | 12.64  | 12.70  |

|      |       |       |       |       |       |       |       |       |       |       |       |
|------|-------|-------|-------|-------|-------|-------|-------|-------|-------|-------|-------|
| 2.56 | 13.07 | 13.21 | 13.13 | 13.21 | 13.23 | 13.13 | 13.01 | 12.96 | 13.03 | 12.88 | 12.72 |
| 2.61 | 12.30 | 12.40 | 12.51 | 12.74 | 12.85 | 12.95 | 12.99 | 13.08 | 13.22 | 13.33 | 13.33 |
| 2.66 | 12.46 | 12.48 | 12.51 | 12.34 | 12.36 | 12.29 | 12.41 | 12.37 | 12.36 | 12.46 | 12.53 |
| 2.71 | 12.79 | 12.86 | 12.87 | 13.02 | 13.02 | 12.87 | 12.94 | 13.01 | 12.88 | 12.84 | 12.83 |
| 2.76 | 12.17 | 12.19 | 12.24 | 12.39 | 12.44 | 12.57 | 12.63 | 12.80 | 12.86 | 13.00 | 13.20 |
| 2.81 | 12.34 | 12.48 | 12.33 | 12.31 | 12.31 | 12.22 | 12.17 | 12.13 | 12.16 | 12.11 | 12.15 |
| 2.86 | 12.32 | 12.50 | 12.52 | 12.64 | 12.73 | 12.70 | 12.64 | 12.68 | 12.73 | 12.67 | 12.77 |
| 2.91 | 12.21 | 12.25 | 12.25 | 12.38 | 12.32 | 12.37 | 12.41 | 12.46 | 12.51 | 12.65 | 12.69 |
| 2.96 | 12.74 | 12.92 | 12.89 | 12.88 | 12.92 | 12.75 | 12.71 | 12.68 | 12.71 | 12.71 | 12.56 |
| 3.01 | 12.27 | 12.34 | 12.47 | 12.52 | 12.60 | 12.76 | 12.70 | 12.81 | 12.88 | 13.01 | 13.11 |
| 3.06 | 11.94 | 12.02 | 11.85 | 12.00 | 11.91 | 11.94 | 11.87 | 11.91 | 11.85 | 12.02 | 12.12 |
| 3.11 | 12.50 | 12.63 | 12.59 | 12.67 | 12.64 | 12.71 | 12.57 | 12.66 | 12.62 | 12.53 | 12.45 |
| 3.16 | 12.10 | 12.15 | 12.24 | 12.36 | 12.32 | 12.42 | 12.48 | 12.51 | 12.65 | 12.72 | 12.69 |
| 3.21 | 12.04 | 12.10 | 12.08 | 12.10 | 12.09 | 12.13 | 12.15 | 12.16 | 12.13 | 12.25 | 12.17 |
| 3.26 | 12.24 | 12.35 | 12.36 | 12.40 | 12.42 | 12.51 | 12.44 | 12.57 | 12.44 | 12.55 | 12.52 |
| 3.31 | 12.04 | 11.99 | 12.08 | 12.07 | 12.18 | 12.24 | 12.27 | 12.35 | 12.33 | 12.55 | 12.59 |
| 3.36 | 12.44 | 12.63 | 12.53 | 12.40 | 12.39 | 12.25 | 12.35 | 12.24 | 12.25 | 12.30 | 12.26 |
| 3.41 | 12.32 | 12.56 | 12.56 | 12.72 | 12.66 | 12.78 | 12.72 | 12.79 | 12.79 | 12.98 | 13.06 |
| 3.46 | 12.03 | 11.97 | 12.00 | 12.18 | 12.09 | 12.10 | 12.07 | 12.21 | 12.13 | 12.28 | 12.32 |
| 3.51 | 12.35 | 12.38 | 12.45 | 12.56 | 12.49 | 12.48 | 12.42 | 12.52 | 12.42 | 12.41 | 12.45 |
| 3.56 | 11.94 | 12.01 | 12.04 | 12.21 | 12.17 | 12.34 | 12.37 | 12.38 | 12.51 | 12.46 | 12.49 |
| 3.61 | 11.70 | 11.89 | 11.80 | 11.76 | 11.83 | 11.85 | 11.90 | 11.75 | 11.83 | 11.99 | 11.99 |
| 3.66 | 12.14 | 12.02 | 12.13 | 12.20 | 12.29 | 12.19 | 12.34 | 12.38 | 12.33 | 12.33 | 12.32 |
| 3.71 | 12.09 | 12.16 | 12.12 | 12.31 | 12.30 | 12.29 | 12.45 | 12.47 | 12.53 | 12.55 | 12.58 |
| 3.76 | 12.62 | 12.75 | 12.72 | 12.79 | 12.73 | 12.74 | 12.76 | 12.82 | 12.80 | 12.74 | 12.77 |
| 3.81 | 11.92 | 11.97 | 12.05 | 12.09 | 12.20 | 12.14 | 12.26 | 12.31 | 12.39 | 12.28 | 12.35 |
| 3.86 | 11.66 | 11.73 | 11.65 | 11.81 | 11.75 | 11.81 | 11.81 | 11.88 | 11.83 | 11.92 | 11.91 |
| 3.91 | 12.49 | 12.52 | 12.61 | 12.67 | 12.57 | 12.62 | 12.61 | 12.63 | 12.59 | 12.59 | 12.66 |
| 3.96 | 11.97 | 12.06 | 12.12 | 12.16 | 12.09 | 12.22 | 12.24 | 12.29 | 12.37 | 12.38 | 12.49 |
| 4.01 | 12.20 | 12.28 | 12.25 | 12.33 | 12.23 | 12.27 | 12.35 | 12.25 | 12.31 | 12.36 | 12.28 |
| 4.06 | 12.44 | 12.58 | 12.53 | 12.57 | 12.59 | 12.60 | 12.59 | 12.64 | 12.63 | 12.65 | 12.72 |
| 4.11 | 12.05 | 12.22 | 12.19 | 12.26 | 12.28 | 12.37 | 12.32 | 12.32 | 12.31 | 12.41 | 12.54 |
| 4.16 | 12.33 | 12.42 | 12.47 | 12.43 | 12.53 | 12.49 | 12.41 | 12.42 | 12.46 | 12.47 | 12.42 |
| 4.21 | 12.55 | 12.63 | 12.65 | 12.70 | 12.74 | 12.73 | 12.79 | 12.81 | 12.75 | 12.83 | 12.82 |
| 4.26 | 12.01 | 12.11 | 12.10 | 12.15 | 12.14 | 12.23 | 12.19 | 12.26 | 12.20 | 12.29 | 12.33 |
| 4.31 | 12.13 | 12.09 | 12.27 | 12.19 | 12.15 | 12.17 | 12.21 | 12.17 | 12.28 | 12.17 | 12.14 |
| 4.36 | 12.13 | 12.21 | 12.26 | 12.29 | 12.31 | 12.28 | 12.40 | 12.32 | 12.37 | 12.45 | 12.37 |
| 4.41 | 11.95 | 11.96 | 11.99 | 12.02 | 12.03 | 12.05 | 12.07 | 12.05 | 12.09 | 12.16 | 12.26 |
| 4.46 | 12.39 | 12.45 | 12.43 | 12.57 | 12.55 | 12.55 | 12.58 | 12.60 | 12.57 | 12.55 | 12.70 |
| 4.51 | 12.09 | 12.17 | 12.16 | 12.18 | 12.18 | 12.17 | 12.28 | 12.19 | 12.28 | 12.47 | 12.39 |
| 4.56 | 12.05 | 12.05 | 12.17 | 12.18 | 12.14 | 12.18 | 12.21 | 12.15 | 12.24 | 12.33 | 12.21 |
| 4.61 | 12.07 | 12.09 | 12.10 | 12.25 | 12.24 | 12.11 | 12.28 | 12.31 | 12.30 | 12.20 | 12.24 |
| 4.66 | 12.08 | 12.21 | 12.25 | 12.27 | 12.31 | 12.37 | 12.34 | 12.34 | 12.44 | 12.44 | 12.40 |
| 4.71 | 12.22 | 12.26 | 12.35 | 12.42 | 12.26 | 12.37 | 12.38 | 12.50 | 12.46 | 12.42 | 12.39 |
| 4.76 | 12.36 | 12.51 | 12.50 | 12.59 | 12.57 | 12.63 | 12.61 | 12.61 | 12.57 | 12.74 | 12.67 |
| 4.81 | 12.03 | 12.05 | 12.15 | 12.13 | 12.15 | 12.17 | 12.19 | 12.30 | 12.18 | 12.21 | 12.18 |
| 4.86 | 12.13 | 12.16 | 12.16 | 12.25 | 12.29 | 12.26 | 12.22 | 12.23 | 12.21 | 12.23 | 12.24 |
| 4.91 | 12.29 | 12.42 | 12.45 | 12.38 | 12.40 | 12.55 | 12.42 | 12.43 | 12.54 | 12.64 | 12.58 |
| 4.96 | 12.02 | 12.13 | 12.13 | 12.27 | 12.15 | 12.20 | 12.22 | 12.27 | 12.22 | 12.31 | 12.36 |
| 5.01 | 12.05 | 12.09 | 12.19 | 12.23 | 12.17 | 12.15 | 12.28 | 12.29 | 12.25 | 12.28 | 12.37 |



|       |       |       |       |       |       |       |       |       |       |       |       |
|-------|-------|-------|-------|-------|-------|-------|-------|-------|-------|-------|-------|
| 5.06  | 12.08 | 12.23 | 12.17 | 12.28 | 12.24 | 12.21 | 12.29 | 12.34 | 12.35 | 12.36 | 12.31 |
| 5.11  | 12.06 | 12.10 | 12.09 | 12.18 | 12.12 | 12.14 | 12.07 | 12.18 | 12.22 | 12.25 | 12.20 |
| 5.16  | 11.91 | 11.96 | 12.00 | 12.07 | 12.13 | 11.96 | 12.11 | 12.18 | 12.13 | 12.26 | 12.25 |
| 5.21  | 11.98 | 11.94 | 11.97 | 12.01 | 12.02 | 12.09 | 12.07 | 12.15 | 12.12 | 12.14 | 12.09 |
| 5.26  | 12.36 | 12.47 | 12.49 | 12.54 | 12.53 | 12.55 | 12.61 | 12.52 | 12.45 | 12.48 | 12.49 |
| 5.31  | 12.23 | 12.22 | 12.39 | 12.38 | 12.32 | 12.43 | 12.46 | 12.47 | 12.44 | 12.51 | 12.58 |
| 5.38  | 12.10 | 12.23 | 12.21 | 12.34 | 12.30 | 12.35 | 12.33 | 12.30 | 12.28 | 12.47 | 12.32 |
| 5.45  | 12.43 | 12.48 | 12.54 | 12.61 | 12.62 | 12.55 | 12.57 | 12.64 | 12.66 | 12.72 | 12.53 |
| 5.53  | 12.02 | 12.15 | 12.14 | 12.21 | 12.21 | 12.25 | 12.24 | 12.25 | 12.31 | 12.28 | 12.35 |
| 5.61  | 12.38 | 12.51 | 12.40 | 12.54 | 12.47 | 12.53 | 12.52 | 12.58 | 12.54 | 12.49 | 12.54 |
| 5.70  | 12.27 | 12.36 | 12.38 | 12.40 | 12.43 | 12.48 | 12.42 | 12.52 | 12.49 | 12.51 | 12.49 |
| 5.80  | 12.39 | 12.40 | 12.42 | 12.49 | 12.49 | 12.47 | 12.36 | 12.50 | 12.42 | 12.45 | 12.52 |
| 5.90  | 11.84 | 11.90 | 11.87 | 11.91 | 11.84 | 11.89 | 11.96 | 11.95 | 12.00 | 12.05 | 12.03 |
| 6.01  | 12.48 | 12.66 | 12.56 | 12.60 | 12.67 | 12.63 | 12.57 | 12.69 | 12.66 | 12.81 | 12.67 |
| 6.13  | 12.09 | 12.16 | 12.24 | 12.30 | 12.25 | 12.11 | 12.18 | 12.14 | 12.20 | 12.24 | 12.32 |
| 6.25  | 11.89 | 12.00 | 12.07 | 12.10 | 12.07 | 12.08 | 12.11 | 12.09 | 12.06 | 12.09 | 12.15 |
| 6.39  | 11.94 | 12.01 | 11.99 | 12.05 | 11.94 | 12.07 | 12.04 | 12.06 | 12.00 | 12.08 | 12.00 |
| 6.53  | 11.91 | 11.99 | 12.01 | 12.01 | 12.03 | 12.02 | 12.08 | 12.01 | 11.96 | 12.12 | 12.02 |
| 6.69  | 12.07 | 12.22 | 12.18 | 12.27 | 12.23 | 12.30 | 12.32 | 12.31 | 12.28 | 12.35 | 12.30 |
| 6.85  | 11.83 | 12.01 | 12.03 | 11.98 | 11.98 | 12.07 | 12.10 | 12.05 | 11.99 | 12.16 | 12.08 |
| 7.03  | 11.97 | 12.11 | 12.09 | 12.08 | 12.00 | 12.12 | 12.01 | 12.09 | 12.10 | 12.16 | 12.19 |
| 7.21  | 12.05 | 12.09 | 12.21 | 12.19 | 12.16 | 12.27 | 12.18 | 12.24 | 12.28 | 12.31 | 12.25 |
| 7.41  | 12.11 | 12.21 | 12.23 | 12.34 | 12.26 | 12.25 | 12.30 | 12.29 | 12.33 | 12.22 | 12.34 |
| 7.63  | 12.48 | 12.54 | 12.49 | 12.57 | 12.55 | 12.49 | 12.55 | 12.58 | 12.44 | 12.53 | 12.51 |
| 7.86  | 11.96 | 12.14 | 12.17 | 12.10 | 12.13 | 12.22 | 12.18 | 12.17 | 12.20 | 12.26 | 12.22 |
| 8.10  | 12.07 | 12.22 | 12.17 | 12.28 | 12.24 | 12.23 | 12.24 | 12.26 | 12.16 | 12.28 | 12.17 |
| 8.36  | 11.69 | 11.71 | 11.81 | 11.72 | 11.79 | 11.70 | 11.79 | 11.84 | 11.73 | 11.89 | 11.78 |
| 8.64  | 11.95 | 12.12 | 12.03 | 12.13 | 12.18 | 12.12 | 12.13 | 12.19 | 12.17 | 12.12 | 12.11 |
| 8.94  | 12.24 | 12.31 | 12.35 | 12.33 | 12.27 | 12.32 | 12.37 | 12.33 | 12.39 | 12.31 | 12.42 |
| 9.26  | 12.49 | 12.51 | 12.43 | 12.64 | 12.59 | 12.53 | 12.50 | 12.60 | 12.50 | 12.58 | 12.50 |
| 9.60  | 12.11 | 12.13 | 12.19 | 12.28 | 12.23 | 12.14 | 12.28 | 12.28 | 12.24 | 12.31 | 12.22 |
| 9.97  | 12.09 | 12.14 | 12.09 | 12.23 | 12.14 | 12.12 | 12.05 | 12.17 | 12.12 | 12.27 | 12.09 |
| 10.36 | 12.26 | 12.30 | 12.37 | 12.46 | 12.42 | 12.39 | 12.39 | 12.43 | 12.43 | 12.41 | 12.36 |
| 10.77 | 12.21 | 12.25 | 12.28 | 12.31 | 12.25 | 12.33 | 12.23 | 12.29 | 12.26 | 12.21 | 12.24 |
| 11.22 | 11.95 | 11.94 | 12.01 | 11.94 | 12.05 | 12.02 | 11.96 | 11.98 | 12.03 | 12.07 | 11.94 |
| 11.70 | 12.12 | 12.22 | 12.28 | 12.33 | 12.30 | 12.29 | 12.33 | 12.34 | 12.24 | 12.33 | 12.27 |
| 12.21 | 11.87 | 11.82 | 11.92 | 11.97 | 11.91 | 11.96 | 11.88 | 12.06 | 12.00 | 12.09 | 11.98 |
| 12.75 | 12.07 | 12.21 | 12.16 | 12.24 | 12.26 | 12.25 | 12.26 | 12.20 | 12.25 | 12.23 | 12.23 |
| 13.33 | 12.22 | 12.18 | 12.22 | 12.35 | 12.24 | 12.33 | 12.32 | 12.31 | 12.29 | 12.41 | 12.30 |
| 13.95 | 12.05 | 12.11 | 12.10 | 12.20 | 12.22 | 12.08 | 12.18 | 12.18 | 12.09 | 12.13 | 12.17 |
| 14.62 | 11.82 | 11.90 | 11.93 | 12.02 | 11.96 | 11.99 | 12.04 | 12.08 | 12.05 | 12.10 | 12.03 |
| 15.33 | 11.79 | 11.88 | 11.87 | 11.87 | 11.87 | 11.77 | 11.85 | 11.93 | 11.92 | 11.97 | 11.89 |
| 16.09 | 11.83 | 11.99 | 11.93 | 11.96 | 11.99 | 11.99 | 11.95 | 11.97 | 12.00 | 12.05 | 12.07 |
| 16.90 | 12.02 | 11.98 | 12.10 | 12.06 | 12.08 | 12.08 | 12.08 | 12.11 | 12.12 | 12.08 | 12.07 |
| 17.77 | 11.89 | 11.97 | 11.93 | 11.94 | 11.93 | 11.93 | 11.98 | 12.04 | 11.92 | 11.95 | 11.95 |
| 18.70 | 11.80 | 11.80 | 11.87 | 11.95 | 11.90 | 11.71 | 11.90 | 11.98 | 11.88 | 11.84 | 11.88 |
| 19.69 | 11.99 | 11.99 | 12.00 | 12.10 | 12.05 | 12.10 | 12.04 | 12.07 | 12.06 | 12.10 | 12.04 |
| 20.75 | 11.82 | 11.88 | 11.94 | 11.97 | 12.00 | 11.93 | 11.89 | 11.80 | 11.93 | 11.98 | 11.93 |
| 21.89 | 12.21 | 12.23 | 12.19 | 12.22 | 12.23 | 12.15 | 12.25 | 12.15 | 12.26 | 12.24 | 12.25 |
| 23.10 | 12.40 | 12.38 | 12.44 | 12.39 | 12.47 | 12.37 | 12.43 | 12.50 | 12.50 | 12.52 | 12.41 |

|        |       |       |       |       |       |       |       |       |       |       |       |
|--------|-------|-------|-------|-------|-------|-------|-------|-------|-------|-------|-------|
| 24.39  | 11.91 | 11.95 | 12.04 | 11.98 | 12.00 | 12.06 | 12.03 | 11.95 | 11.98 | 12.00 | 11.93 |
| 25.78  | 12.06 | 12.09 | 12.23 | 12.17 | 12.17 | 12.15 | 12.12 | 12.13 | 12.19 | 12.21 | 12.26 |
| 27.26  | 12.01 | 12.06 | 12.01 | 12.14 | 12.08 | 12.09 | 12.12 | 12.11 | 12.00 | 12.06 | 12.01 |
| 28.84  | 12.10 | 12.04 | 12.13 | 12.19 | 12.11 | 12.12 | 12.11 | 12.15 | 12.05 | 12.18 | 12.23 |
| 30.53  | 12.13 | 12.19 | 12.15 | 12.13 | 12.12 | 12.14 | 12.13 | 12.20 | 12.10 | 12.15 | 12.17 |
| 32.34  | 11.97 | 11.87 | 11.95 | 11.98 | 12.01 | 11.95 | 11.98 | 11.96 | 12.03 | 11.97 | 11.96 |
| 34.27  | 12.07 | 12.08 | 12.12 | 12.21 | 12.17 | 12.17 | 12.24 | 12.21 | 12.21 | 12.25 | 12.17 |
| 36.34  | 11.93 | 11.99 | 11.93 | 12.09 | 12.04 | 11.91 | 12.04 | 11.95 | 12.01 | 12.00 | 12.01 |
| 38.55  | 12.13 | 12.15 | 12.17 | 12.22 | 12.23 | 12.16 | 12.19 | 12.20 | 12.15 | 12.29 | 12.12 |
| 40.91  | 11.95 | 12.12 | 12.14 | 12.04 | 12.00 | 12.05 | 12.04 | 12.11 | 12.04 | 12.02 | 12.03 |
| 43.43  | 11.79 | 11.74 | 11.76 | 11.91 | 11.72 | 11.79 | 11.75 | 11.83 | 11.72 | 11.84 | 11.77 |
| 46.13  | 11.82 | 11.94 | 11.90 | 11.83 | 11.95 | 11.92 | 11.99 | 11.92 | 11.95 | 11.95 | 11.99 |
| 49.01  | 12.23 | 12.35 | 12.31 | 12.35 | 12.27 | 12.30 | 12.32 | 12.32 | 12.28 | 12.25 | 12.25 |
| 52.09  | 12.01 | 11.98 | 12.11 | 12.08 | 12.05 | 12.05 | 12.01 | 12.09 | 12.03 | 12.05 | 11.97 |
| 55.39  | 11.90 | 11.96 | 11.98 | 12.01 | 11.98 | 11.88 | 11.90 | 12.01 | 12.07 | 12.02 | 11.97 |
| 58.91  | 11.79 | 11.91 | 11.91 | 11.94 | 11.92 | 12.01 | 11.92 | 11.91 | 11.97 | 11.98 | 11.93 |
| 62.68  | 12.01 | 12.06 | 12.05 | 12.08 | 12.12 | 11.95 | 12.06 | 12.06 | 12.12 | 12.04 | 12.07 |
| 66.70  | 12.04 | 12.09 | 12.14 | 12.22 | 12.18 | 12.12 | 12.10 | 12.11 | 12.07 | 12.17 | 12.08 |
| 71.00  | 12.06 | 12.14 | 12.11 | 12.06 | 12.15 | 12.07 | 12.12 | 12.13 | 12.19 | 12.07 | 12.19 |
| 75.60  | 12.01 | 12.01 | 12.01 | 12.03 | 12.07 | 11.97 | 11.99 | 12.05 | 11.90 | 12.05 | 11.95 |
| 80.51  | 12.15 | 12.17 | 12.19 | 12.19 | 12.17 | 12.14 | 12.24 | 12.29 | 12.23 | 12.23 | 12.27 |
| 85.77  | 12.38 | 12.39 | 12.38 | 12.39 | 12.39 | 12.44 | 12.30 | 12.33 | 12.30 | 12.29 | 12.27 |
| 91.38  | 12.31 | 12.47 | 12.32 | 12.45 | 12.35 | 12.39 | 12.44 | 12.47 | 12.39 | 12.45 | 12.35 |
| 97.39  | 12.10 | 12.11 | 12.19 | 12.23 | 12.14 | 12.21 | 12.13 | 12.21 | 12.13 | 12.16 | 12.13 |
| 103.80 | 12.63 | 12.65 | 12.60 | 12.57 | 12.64 | 12.72 | 12.72 | 12.76 | 12.60 | 12.67 | 12.64 |
| 110.66 | 12.33 | 12.27 | 12.26 | 12.34 | 12.25 | 12.23 | 12.32 | 12.23 | 12.26 | 12.23 | 12.26 |
| 117.99 | 12.15 | 12.14 | 12.21 | 12.22 | 12.10 | 12.04 | 12.11 | 12.04 | 12.07 | 12.16 | 12.13 |
| 125.83 | 12.45 | 12.54 | 12.43 | 12.56 | 12.47 | 12.55 | 12.56 | 12.58 | 12.53 | 12.44 | 12.41 |
| 134.21 | 12.31 | 12.42 | 12.31 | 12.37 | 12.32 | 12.29 | 12.32 | 12.28 | 12.34 | 12.39 | 12.25 |
| 143.17 | 12.27 | 12.41 | 12.33 | 12.36 | 12.33 | 12.34 | 12.35 | 12.27 | 12.24 | 12.30 | 12.23 |
| 152.74 | 12.35 | 12.44 | 12.43 | 12.51 | 12.38 | 12.39 | 12.39 | 12.50 | 12.40 | 12.46 | 12.35 |
| 162.97 | 12.56 | 12.50 | 12.57 | 12.56 | 12.52 | 12.51 | 12.44 | 12.52 | 12.45 | 12.45 | 12.46 |
| 173.91 | 12.48 | 12.42 | 12.49 | 12.51 | 12.54 | 12.49 | 12.45 | 12.34 | 12.28 | 12.43 | 12.42 |
| 185.60 | 12.56 | 12.68 | 12.67 | 12.68 | 12.62 | 12.67 | 12.55 | 12.71 | 12.64 | 12.55 | 12.57 |
| 198.10 | 12.50 | 12.65 | 12.50 | 12.65 | 12.57 | 12.50 | 12.50 | 12.60 | 12.39 | 12.50 | 12.47 |
| 211.46 | 12.64 | 12.77 | 12.70 | 12.74 | 12.72 | 12.70 | 12.75 | 12.73 | 12.71 | 12.81 | 12.72 |
| 225.75 | 12.66 | 12.63 | 12.65 | 12.67 | 12.65 | 12.61 | 12.68 | 12.67 | 12.49 | 12.65 | 12.47 |
| 241.01 | 12.53 | 12.62 | 12.67 | 12.63 | 12.60 | 12.67 | 12.61 | 12.59 | 12.49 | 12.54 | 12.50 |
| 257.33 | 12.61 | 12.67 | 12.67 | 12.73 | 12.63 | 12.65 | 12.65 | 12.61 | 12.60 | 12.52 | 12.52 |
| 274.77 | 12.82 | 12.79 | 12.74 | 12.79 | 12.72 | 12.73 | 12.81 | 12.72 | 12.65 | 12.63 | 12.61 |
| 293.42 | 12.76 | 12.77 | 12.79 | 12.76 | 12.80 | 12.74 | 12.79 | 12.77 | 12.72 | 12.69 | 12.64 |
| 313.35 | 12.60 | 12.59 | 12.61 | 12.60 | 12.57 | 12.62 | 12.71 | 12.61 | 12.43 | 12.58 | 12.44 |
| 334.66 | 12.85 | 12.86 | 12.89 | 12.74 | 12.88 | 12.80 | 12.75 | 12.83 | 12.62 | 12.68 | 12.66 |
| 357.43 | 12.87 | 12.71 | 12.75 | 12.72 | 12.72 | 12.71 | 12.75 | 12.66 | 12.62 | 12.73 | 12.67 |
| 381.78 | 12.46 | 12.54 | 12.48 | 12.50 | 12.41 | 12.41 | 12.44 | 12.42 | 12.39 | 12.32 | 12.32 |
| 407.80 | 12.47 | 12.49 | 12.55 | 12.68 | 12.49 | 12.39 | 12.54 | 12.55 | 12.44 | 12.42 | 12.44 |
| 435.62 | 12.62 | 12.71 | 12.68 | 12.71 | 12.65 | 12.55 | 12.55 | 12.47 | 12.46 | 12.52 | 12.51 |
| 465.35 | 12.59 | 12.65 | 12.60 | 12.71 | 12.63 | 12.63 | 12.59 | 12.59 | 12.51 | 12.63 | 12.42 |
| 497.14 | 12.56 | 12.68 | 12.67 | 12.60 | 12.46 | 12.51 | 12.54 | 12.55 | 12.45 | 12.36 | 12.39 |
| 531.11 | 12.34 | 12.25 | 12.31 | 12.35 | 12.30 | 12.28 | 12.27 | 12.23 | 12.16 | 12.15 | 12.20 |

|         |       |       |       |       |       |       |       |       |       |       |       |
|---------|-------|-------|-------|-------|-------|-------|-------|-------|-------|-------|-------|
| 567.43  | 12.64 | 12.65 | 12.63 | 12.67 | 12.54 | 12.52 | 12.46 | 12.53 | 12.44 | 12.44 | 12.32 |
| 606.26  | 12.68 | 12.65 | 12.58 | 12.74 | 12.64 | 12.52 | 12.56 | 12.48 | 12.55 | 12.40 | 12.43 |
| 647.76  | 12.48 | 12.49 | 12.52 | 12.51 | 12.49 | 12.52 | 12.44 | 12.43 | 12.47 | 12.43 | 12.43 |
| 692.12  | 12.20 | 12.18 | 12.29 | 12.15 | 12.16 | 11.99 | 12.07 | 11.95 | 11.99 | 11.98 | 11.92 |
| 739.53  | 12.48 | 12.50 | 12.57 | 12.45 | 12.52 | 12.48 | 12.44 | 12.42 | 12.41 | 12.30 | 12.40 |
| 790.22  | 12.39 | 12.29 | 12.32 | 12.35 | 12.21 | 12.18 | 12.16 | 12.26 | 12.06 | 12.07 | 12.13 |
| 844.40  | 12.36 | 12.44 | 12.33 | 12.29 | 12.43 | 12.29 | 12.25 | 12.26 | 12.24 | 12.25 | 12.16 |
| 902.32  | 12.41 | 12.44 | 12.37 | 12.37 | 12.33 | 12.24 | 12.29 | 12.27 | 12.17 | 12.17 | 12.19 |
| 964.23  | 12.01 | 12.01 | 12.13 | 12.10 | 12.06 | 12.03 | 11.96 | 11.99 | 11.81 | 11.94 | 11.80 |
| 1030.41 | 12.28 | 12.26 | 12.26 | 12.24 | 12.29 | 12.25 | 12.18 | 12.18 | 12.11 | 12.11 | 12.03 |
| 1101.15 | 12.16 | 12.16 | 12.13 | 12.25 | 12.05 | 12.07 | 12.01 | 11.99 | 11.97 | 11.90 | 11.86 |
| 1176.77 | 12.11 | 12.24 | 12.04 | 12.11 | 12.17 | 11.98 | 11.98 | 11.97 | 11.98 | 11.91 | 11.90 |
| 1257.60 | 12.08 | 12.23 | 12.18 | 12.06 | 11.99 | 12.02 | 12.01 | 11.96 | 11.91 | 12.00 | 11.88 |
| 1344.00 | 11.99 | 12.03 | 12.04 | 12.03 | 12.00 | 11.84 | 11.77 | 11.83 | 11.80 | 11.80 | 11.74 |
| 1436.36 | 11.91 | 11.93 | 11.82 | 11.87 | 11.83 | 11.91 | 11.83 | 11.72 | 11.64 | 11.69 | 11.56 |
| 1535.09 | 12.06 | 12.06 | 11.91 | 11.95 | 11.95 | 11.87 | 11.95 | 11.76 | 11.76 | 11.73 | 11.64 |
| 1640.63 | 11.80 | 11.75 | 11.79 | 11.76 | 11.77 | 11.65 | 11.63 | 11.61 | 11.54 | 11.60 | 11.44 |
| 1753.44 | 11.78 | 11.83 | 11.84 | 11.86 | 11.77 | 11.69 | 11.63 | 11.63 | 11.49 | 11.56 | 11.50 |
| 1874.02 | 11.72 | 11.68 | 11.55 | 11.56 | 11.47 | 11.49 | 11.43 | 11.48 | 11.38 | 11.37 | 11.26 |
| 2002.92 | 11.75 | 11.70 | 11.66 | 11.77 | 11.61 | 11.64 | 11.57 | 11.63 | 11.40 | 11.43 | 11.57 |
| 2140.71 | 11.58 | 11.55 | 11.49 | 11.41 | 11.46 | 11.45 | 11.31 | 11.28 | 11.26 | 11.26 | 11.17 |
| 2288.00 | 11.43 | 11.50 | 11.45 | 11.42 | 11.42 | 11.35 | 11.34 | 11.22 | 11.16 | 11.13 | 11.09 |
| 2445.44 | 11.40 | 11.32 | 11.34 | 11.41 | 11.33 | 11.12 | 11.17 | 11.17 | 11.08 | 11.09 | 11.01 |
| 2613.73 | 11.37 | 11.37 | 11.42 | 11.34 | 11.21 | 11.25 | 11.19 | 11.03 | 11.10 | 11.09 | 10.99 |
| 2793.63 | 11.08 | 11.07 | 10.96 | 10.99 | 11.01 | 10.97 | 10.93 | 10.92 | 10.81 | 10.82 | 10.66 |
| 2985.93 | 10.81 | 10.86 | 10.80 | 10.75 | 10.71 | 10.72 | 10.64 | 10.59 | 10.49 | 10.56 | 10.38 |
| 3191.49 | 10.69 | 10.62 | 10.61 | 10.54 | 10.49 | 10.47 | 10.53 | 10.47 | 10.32 | 10.32 | 10.27 |
| 3411.21 | 10.46 | 10.42 | 10.46 | 10.45 | 10.27 | 10.38 | 10.35 | 10.27 | 10.24 | 10.13 | 10.06 |
| 3646.09 | 10.34 | 10.29 | 10.17 | 10.28 | 10.12 | 10.05 | 9.95  | 10.04 | 9.95  | 9.94  | 9.85  |
| 3897.16 | 10.13 | 10.18 | 10.08 | 10.07 | 9.86  | 9.86  | 9.86  | 9.84  | 9.68  | 9.69  | 9.61  |

| Wavelength<br>(nm) | 631.72 | 633.14 | 634.56 | 635.99 | 637.41 | 638.84 | 640.26 | 641.68 | 643.11 | 644.53 | 645.96 |
|--------------------|--------|--------|--------|--------|--------|--------|--------|--------|--------|--------|--------|
| Time<br>(ps)       |        |        |        |        |        |        |        |        |        |        |        |
| -2.74              | 0.06   | -0.02  | -0.03  | 0.00   | -0.04  | 0.03   | 0.02   | 0.07   | 0.09   | -0.02  | -0.02  |
| -2.24              | -0.09  | 0.07   | 0.06   | 0.08   | 0.10   | 0.04   | -0.01  | 0.05   | -0.02  | -0.11  | 0.02   |
| -1.74              | 0.12   | 0.06   | 0.06   | 0.02   | 0.22   | 0.15   | 0.07   | 0.15   | 0.21   | 0.13   | 0.10   |
| -1.24              | -0.05  | -0.08  | -0.04  | -0.07  | -0.01  | -0.04  | 0.01   | -0.10  | -0.02  | -0.03  | -0.07  |
| -0.74              | 0.00   | 0.04   | 0.03   | 0.08   | -0.03  | -0.03  | -0.01  | -0.07  | -0.06  | 0.04   | -0.11  |
| -0.24              | -0.03  | -0.08  | -0.04  | 0.01   | -0.10  | 0.00   | -0.01  | 0.04   | -0.05  | 0.06   | 0.06   |
| -0.14              | 0.02   | 0.04   | -0.06  | 0.03   | -0.07  | -0.06  | -0.03  | -0.06  | -0.07  | -0.05  | -0.03  |
| -0.04              | -0.04  | -0.03  | 0.01   | -0.14  | -0.07  | -0.08  | -0.04  | -0.08  | -0.08  | 0.00   | 0.05   |
| 0.06               | 0.06   | -0.02  | 0.03   | 0.02   | 0.00   | 0.05   | 0.02   | -0.06  | -0.03  | -0.03  | 0.01   |
| 0.16               | 0.23   | 0.17   | 0.23   | 0.29   | 0.20   | 0.18   | 0.13   | 0.20   | 0.18   | 0.17   | 0.21   |
| 0.26               | 0.14   | -0.01  | 0.08   | 0.06   | 0.04   | -0.01  | 0.12   | 0.06   | 0.01   | -0.07  | 0.09   |
| 0.31               | -0.06  | 0.06   | -0.01  | 0.06   | 0.11   | 0.07   | 0.07   | -0.03  | -0.03  | -0.06  | -0.06  |
| 0.36               | -0.03  | -0.03  | -0.05  | 0.14   | 0.06   | 0.06   | -0.01  | 0.00   | -0.08  | -0.02  | -0.02  |
| 0.41               | -0.02  | -0.01  | -0.03  | 0.03   | 0.01   | -0.05  | -0.02  | 0.02   | -0.08  | 0.03   | 0.00   |
| 0.46               | 0.02   | -0.02  | 0.08   | 0.02   | 0.00   | -0.07  | -0.04  | -0.07  | -0.07  | -0.01  | 0.03   |
| 0.51               | -0.07  | 0.03   | 0.01   | -0.03  | 0.01   | -0.03  | 0.01   | -0.08  | -0.10  | -0.07  | 0.00   |

|      |        |        |        |        |        |        |        |        |        |        |        |
|------|--------|--------|--------|--------|--------|--------|--------|--------|--------|--------|--------|
| 0.56 | 0.00   | -0.01  | 0.08   | 0.07   | 0.07   | 0.03   | 0.04   | 0.17   | 0.11   | -0.05  | -0.04  |
| 0.61 | 0.05   | 0.01   | 0.11   | 0.02   | 0.05   | 0.03   | 0.01   | 0.04   | -0.01  | -0.02  | -0.09  |
| 0.66 | 0.13   | 0.06   | 0.01   | 0.05   | 0.06   | 0.03   | 0.01   | 0.07   | 0.02   | 0.04   | 0.03   |
| 0.71 | 0.03   | 0.03   | -0.06  | 0.07   | 0.04   | 0.02   | 0.04   | -0.01  | -0.11  | 0.04   | 0.03   |
| 0.76 | 0.10   | 0.03   | 0.23   | 0.11   | 0.13   | 0.13   | 0.11   | 0.14   | 0.12   | 0.13   | 0.14   |
| 0.81 | 0.08   | 0.18   | 0.07   | 0.15   | 0.05   | 0.02   | 0.13   | 0.22   | 0.08   | 0.07   | 0.06   |
| 0.86 | 0.13   | 0.05   | 0.06   | 0.01   | 0.17   | -0.02  | 0.17   | 0.11   | 0.08   | 0.17   | 0.11   |
| 0.91 | 0.10   | 0.16   | 0.12   | 0.05   | 0.23   | 0.06   | 0.18   | 0.13   | 0.06   | 0.05   | 0.09   |
| 0.96 | 0.06   | -0.04  | 0.15   | 0.11   | 0.01   | 0.12   | 0.01   | 0.00   | -0.03  | 0.03   | 0.06   |
| 1.01 | 0.10   | 0.01   | 0.09   | 0.04   | 0.17   | 0.10   | 0.05   | 0.08   | -0.01  | 0.06   | 0.02   |
| 1.06 | -0.03  | 0.11   | -0.04  | 0.00   | 0.13   | -0.08  | 0.03   | -0.05  | -0.11  | 0.03   | 0.06   |
| 1.11 | 0.08   | 0.02   | -0.05  | 0.07   | 0.11   | -0.06  | -0.03  | 0.02   | 0.00   | -0.11  | 0.05   |
| 1.16 | 0.14   | 0.16   | -0.03  | 0.05   | 0.13   | 0.07   | 0.07   | 0.04   | 0.08   | 0.13   | -0.01  |
| 1.21 | 0.00   | 0.31   | 0.18   | -0.04  | -0.08  | 0.12   | 0.23   | 0.30   | 0.05   | 0.01   | 0.09   |
| 1.26 | -0.17  | -0.24  | -0.19  | 0.09   | 0.28   | 0.17   | -0.04  | 0.00   | -0.18  | -0.17  | -0.17  |
| 1.31 | 1.09   | 0.51   | -0.13  | -0.66  | -0.92  | -1.09  | -1.02  | -0.68  | -0.38  | -0.07  | 0.10   |
| 1.36 | -39.64 | -34.30 | -29.25 | -24.92 | -21.31 | -18.33 | -16.02 | -14.27 | -13.02 | -12.04 | -11.25 |
| 1.41 | 82.94  | 78.92  | 75.33  | 71.98  | 68.73  | 65.29  | 61.51  | 58.13  | 54.05  | 50.29  | 45.75  |
| 1.46 | 29.30  | 36.48  | 43.48  | 50.31  | 57.03  | 63.11  | 69.13  | 74.43  | 78.35  | 83.60  | 85.17  |
| 1.51 | 20.03  | 19.33  | 18.34  | 17.17  | 15.95  | 14.63  | 13.12  | 11.53  | 10.09  | 8.39   | 6.83   |
| 1.56 | 17.62  | 18.20  | 18.68  | 19.22  | 19.65  | 20.26  | 20.61  | 21.01  | 21.18  | 21.49  | 21.33  |
| 1.61 | 14.27  | 14.48  | 14.27  | 13.90  | 13.78  | 13.94  | 14.40  | 15.14  | 15.56  | 15.55  | 15.47  |
| 1.66 | 17.25  | 17.17  | 17.06  | 17.01  | 16.82  | 16.50  | 16.17  | 15.84  | 15.31  | 15.17  | 14.60  |
| 1.71 | 13.20  | 13.28  | 13.59  | 13.79  | 14.06  | 14.43  | 14.75  | 15.14  | 15.35  | 15.87  | 16.07  |
| 1.76 | 14.56  | 14.33  | 14.09  | 13.80  | 13.50  | 13.27  | 13.05  | 12.92  | 12.71  | 12.66  | 12.52  |
| 1.81 | 15.33  | 15.56  | 15.62  | 15.65  | 15.81  | 15.66  | 15.58  | 15.60  | 15.37  | 15.18  | 14.91  |
| 1.86 | 12.73  | 12.86  | 13.24  | 13.36  | 13.72  | 13.99  | 14.20  | 14.75  | 14.85  | 15.37  | 15.51  |
| 1.91 | 14.49  | 14.16  | 14.06  | 13.90  | 13.64  | 13.40  | 13.01  | 12.76  | 12.38  | 12.25  | 11.88  |
| 1.96 | 14.12  | 14.37  | 14.60  | 14.71  | 14.81  | 15.12  | 15.23  | 15.23  | 15.15  | 15.09  | 14.92  |
| 2.01 | 12.27  | 12.12  | 12.01  | 11.98  | 12.10  | 12.14  | 12.25  | 12.44  | 12.56  | 12.86  | 13.13  |
| 2.06 | 14.80  | 14.94  | 14.83  | 14.76  | 14.69  | 14.58  | 14.36  | 14.26  | 13.91  | 13.73  | 13.40  |
| 2.11 | 12.93  | 13.29  | 13.51  | 13.62  | 14.00  | 14.20  | 14.32  | 14.51  | 14.70  | 14.95  | 14.96  |
| 2.16 | 13.22  | 13.18  | 12.95  | 12.92  | 12.77  | 12.56  | 12.49  | 12.39  | 12.19  | 12.14  | 12.19  |
| 2.21 | 14.43  | 14.59  | 14.50  | 14.68  | 14.69  | 14.64  | 14.42  | 14.36  | 14.19  | 14.06  | 13.81  |
| 2.26 | 12.60  | 12.73  | 12.84  | 12.88  | 13.01  | 13.21  | 13.42  | 13.60  | 13.79  | 14.00  | 14.16  |
| 2.31 | 13.58  | 13.44  | 13.33  | 13.10  | 13.16  | 12.91  | 12.81  | 12.56  | 12.47  | 12.29  | 12.15  |
| 2.36 | 13.48  | 13.70  | 13.69  | 13.83  | 13.89  | 13.86  | 13.82  | 13.73  | 13.64  | 13.56  | 13.39  |
| 2.41 | 12.29  | 12.34  | 12.38  | 12.37  | 12.45  | 12.51  | 12.70  | 12.79  | 12.86  | 12.99  | 13.21  |
| 2.46 | 13.36  | 13.44  | 13.42  | 13.35  | 13.22  | 13.06  | 12.97  | 12.79  | 12.62  | 12.47  | 12.31  |
| 2.51 | 12.88  | 12.96  | 13.15  | 13.29  | 13.50  | 13.64  | 13.84  | 14.03  | 14.20  | 14.53  | 14.51  |
| 2.56 | 12.73  | 12.65  | 12.67  | 12.52  | 12.49  | 12.45  | 12.35  | 12.32  | 12.35  | 12.30  | 12.31  |
| 2.61 | 13.29  | 13.31  | 13.36  | 13.25  | 13.26  | 13.12  | 13.04  | 12.91  | 12.61  | 12.70  | 12.46  |
| 2.66 | 12.56  | 12.65  | 12.76  | 12.81  | 13.10  | 13.20  | 13.29  | 13.42  | 13.51  | 13.51  | 13.67  |
| 2.71 | 12.72  | 12.66  | 12.53  | 12.52  | 12.42  | 12.34  | 12.20  | 12.22  | 12.10  | 12.04  | 12.11  |
| 2.76 | 13.17  | 13.20  | 13.40  | 13.46  | 13.48  | 13.52  | 13.54  | 13.55  | 13.39  | 13.25  | 13.24  |
| 2.81 | 12.10  | 12.21  | 12.21  | 12.26  | 12.38  | 12.52  | 12.52  | 12.50  | 12.65  | 12.86  | 12.92  |
| 2.86 | 12.51  | 12.66  | 12.60  | 12.44  | 12.39  | 12.44  | 12.37  | 12.23  | 12.22  | 12.21  | 12.13  |
| 2.91 | 12.81  | 12.84  | 12.98  | 13.11  | 13.11  | 13.32  | 13.43  | 13.47  | 13.51  | 13.62  | 13.53  |
| 2.96 | 12.52  | 12.50  | 12.47  | 12.47  | 12.50  | 12.59  | 12.52  | 12.48  | 12.44  | 12.53  | 12.71  |
| 3.01 | 13.09  | 13.17  | 13.17  | 13.22  | 13.26  | 13.18  | 13.18  | 13.03  | 13.02  | 12.99  | 12.72  |

|      |       |       |       |       |       |       |       |       |       |       |       |
|------|-------|-------|-------|-------|-------|-------|-------|-------|-------|-------|-------|
| 3.06 | 12.02 | 12.09 | 12.18 | 12.35 | 12.26 | 12.43 | 12.58 | 12.73 | 12.60 | 12.79 | 12.88 |
| 3.11 | 12.41 | 12.41 | 12.25 | 12.21 | 12.37 | 12.35 | 12.22 | 12.16 | 12.19 | 12.16 | 12.16 |
| 3.16 | 12.76 | 12.96 | 12.99 | 13.03 | 13.00 | 13.16 | 13.07 | 13.02 | 12.86 | 12.97 | 12.76 |
| 3.21 | 12.11 | 12.21 | 12.32 | 12.22 | 12.37 | 12.40 | 12.45 | 12.44 | 12.46 | 12.57 | 12.68 |
| 3.26 | 12.38 | 12.39 | 12.44 | 12.33 | 12.26 | 12.25 | 12.22 | 12.21 | 12.16 | 12.16 | 12.09 |
| 3.31 | 12.58 | 12.53 | 12.71 | 12.81 | 12.93 | 12.84 | 12.88 | 13.03 | 12.95 | 13.01 | 12.92 |
| 3.36 | 12.21 | 12.21 | 12.09 | 12.11 | 12.30 | 12.29 | 12.30 | 12.27 | 12.34 | 12.49 | 12.44 |
| 3.41 | 12.91 | 12.91 | 12.86 | 12.74 | 12.89 | 12.69 | 12.71 | 12.59 | 12.50 | 12.42 | 12.35 |
| 3.46 | 12.35 | 12.44 | 12.51 | 12.52 | 12.65 | 12.71 | 12.71 | 12.82 | 12.77 | 12.72 | 12.93 |
| 3.51 | 12.44 | 12.27 | 12.26 | 12.32 | 12.24 | 12.21 | 12.19 | 12.14 | 12.06 | 12.15 | 12.12 |
| 3.56 | 12.48 | 12.76 | 12.69 | 12.75 | 12.68 | 12.74 | 12.71 | 12.54 | 12.62 | 12.52 | 12.46 |
| 3.61 | 11.98 | 12.00 | 12.04 | 12.11 | 12.26 | 12.20 | 12.30 | 12.30 | 12.55 | 12.56 | 12.55 |
| 3.66 | 12.39 | 12.24 | 12.30 | 12.19 | 12.25 | 12.22 | 12.15 | 12.08 | 12.00 | 12.00 | 11.82 |
| 3.71 | 12.58 | 12.74 | 12.73 | 12.93 | 12.86 | 12.90 | 12.98 | 13.00 | 12.94 | 13.00 | 13.02 |
| 3.76 | 12.74 | 12.75 | 12.82 | 12.84 | 12.88 | 12.90 | 13.00 | 12.91 | 12.76 | 12.80 | 12.93 |
| 3.81 | 12.33 | 12.33 | 12.35 | 12.34 | 12.37 | 12.31 | 12.25 | 12.16 | 12.15 | 12.09 | 12.06 |
| 3.86 | 12.08 | 11.99 | 12.17 | 12.17 | 12.15 | 12.29 | 12.29 | 12.37 | 12.35 | 12.46 | 12.47 |
| 3.91 | 12.65 | 12.54 | 12.49 | 12.52 | 12.58 | 12.55 | 12.43 | 12.44 | 12.39 | 12.35 | 12.45 |
| 3.96 | 12.40 | 12.55 | 12.58 | 12.37 | 12.50 | 12.35 | 12.39 | 12.50 | 12.33 | 12.50 | 12.23 |
| 4.01 | 12.40 | 12.34 | 12.46 | 12.41 | 12.47 | 12.59 | 12.69 | 12.65 | 12.67 | 12.69 | 12.69 |
| 4.06 | 12.64 | 12.67 | 12.63 | 12.73 | 12.65 | 12.54 | 12.60 | 12.58 | 12.58 | 12.37 | 12.36 |
| 4.11 | 12.53 | 12.55 | 12.48 | 12.54 | 12.57 | 12.57 | 12.74 | 12.62 | 12.63 | 12.50 | 12.54 |
| 4.16 | 12.45 | 12.48 | 12.50 | 12.49 | 12.54 | 12.48 | 12.61 | 12.59 | 12.52 | 12.63 | 12.51 |
| 4.21 | 12.75 | 12.76 | 12.77 | 12.81 | 12.82 | 12.79 | 12.77 | 12.63 | 12.74 | 12.61 | 12.62 |
| 4.26 | 12.39 | 12.36 | 12.41 | 12.42 | 12.52 | 12.50 | 12.44 | 12.50 | 12.54 | 12.60 | 12.62 |
| 4.31 | 12.04 | 12.24 | 12.14 | 12.18 | 12.08 | 12.09 | 12.01 | 12.15 | 12.18 | 12.13 | 12.17 |
| 4.36 | 12.28 | 12.45 | 12.38 | 12.34 | 12.46 | 12.33 | 12.39 | 12.37 | 12.26 | 12.27 | 12.26 |
| 4.41 | 12.14 | 12.17 | 12.23 | 12.27 | 12.27 | 12.24 | 12.33 | 12.36 | 12.27 | 12.34 | 12.31 |
| 4.46 | 12.49 | 12.47 | 12.58 | 12.55 | 12.48 | 12.60 | 12.47 | 12.38 | 12.39 | 12.43 | 12.34 |
| 4.51 | 12.44 | 12.32 | 12.44 | 12.47 | 12.59 | 12.53 | 12.63 | 12.62 | 12.54 | 12.42 | 12.41 |
| 4.56 | 12.32 | 12.37 | 12.31 | 12.33 | 12.38 | 12.32 | 12.40 | 12.42 | 12.39 | 12.39 | 12.43 |
| 4.61 | 12.25 | 12.28 | 12.20 | 12.26 | 12.32 | 12.24 | 12.16 | 12.30 | 12.17 | 12.29 | 12.17 |
| 4.66 | 12.51 | 12.48 | 12.59 | 12.57 | 12.56 | 12.59 | 12.60 | 12.57 | 12.58 | 12.52 | 12.45 |
| 4.71 | 12.34 | 12.49 | 12.34 | 12.50 | 12.57 | 12.52 | 12.37 | 12.55 | 12.47 | 12.42 | 12.51 |
| 4.76 | 12.56 | 12.63 | 12.59 | 12.62 | 12.64 | 12.67 | 12.53 | 12.59 | 12.52 | 12.54 | 12.43 |
| 4.81 | 12.26 | 12.29 | 12.35 | 12.45 | 12.36 | 12.42 | 12.37 | 12.38 | 12.35 | 12.36 | 12.34 |
| 4.86 | 12.23 | 12.29 | 12.30 | 12.34 | 12.33 | 12.40 | 12.29 | 12.34 | 12.27 | 12.27 | 12.28 |
| 4.91 | 12.53 | 12.63 | 12.61 | 12.70 | 12.69 | 12.60 | 12.54 | 12.65 | 12.52 | 12.56 | 12.54 |
| 4.96 | 12.21 | 12.31 | 12.30 | 12.33 | 12.43 | 12.49 | 12.54 | 12.55 | 12.48 | 12.50 | 12.43 |
| 5.01 | 12.23 | 12.22 | 12.21 | 12.22 | 12.24 | 12.20 | 12.22 | 12.25 | 12.11 | 12.09 | 12.14 |
| 5.06 | 12.29 | 12.40 | 12.57 | 12.51 | 12.65 | 12.60 | 12.58 | 12.52 | 12.46 | 12.62 | 12.47 |
| 5.11 | 12.21 | 12.29 | 12.18 | 12.29 | 12.31 | 12.27 | 12.35 | 12.25 | 12.27 | 12.25 | 12.30 |
| 5.16 | 12.16 | 12.24 | 12.19 | 12.12 | 12.14 | 12.21 | 12.24 | 12.18 | 12.13 | 12.16 | 12.06 |
| 5.21 | 12.09 | 12.12 | 12.16 | 12.14 | 12.25 | 12.19 | 12.22 | 12.21 | 12.31 | 12.37 | 12.22 |
| 5.26 | 12.49 | 12.52 | 12.53 | 12.50 | 12.56 | 12.59 | 12.44 | 12.48 | 12.43 | 12.47 | 12.33 |
| 5.31 | 12.47 | 12.58 | 12.47 | 12.60 | 12.56 | 12.57 | 12.56 | 12.49 | 12.60 | 12.60 | 12.37 |
| 5.38 | 12.32 | 12.47 | 12.49 | 12.55 | 12.46 | 12.46 | 12.46 | 12.37 | 12.50 | 12.47 | 12.60 |
| 5.45 | 12.59 | 12.66 | 12.63 | 12.62 | 12.57 | 12.57 | 12.64 | 12.62 | 12.59 | 12.59 | 12.45 |
| 5.53 | 12.24 | 12.40 | 12.43 | 12.41 | 12.40 | 12.37 | 12.42 | 12.46 | 12.37 | 12.36 | 12.32 |
| 5.61 | 12.55 | 12.57 | 12.51 | 12.60 | 12.66 | 12.58 | 12.66 | 12.55 | 12.40 | 12.57 | 12.54 |

|       |       |       |       |       |       |       |       |       |       |       |       |
|-------|-------|-------|-------|-------|-------|-------|-------|-------|-------|-------|-------|
| 5.70  | 12.60 | 12.63 | 12.52 | 12.53 | 12.58 | 12.55 | 12.56 | 12.52 | 12.30 | 12.46 | 12.32 |
| 5.80  | 12.42 | 12.37 | 12.43 | 12.43 | 12.61 | 12.38 | 12.50 | 12.47 | 12.39 | 12.45 | 12.40 |
| 5.90  | 12.04 | 12.05 | 12.14 | 12.14 | 12.07 | 12.18 | 12.31 | 12.35 | 12.17 | 12.28 | 12.15 |
| 6.01  | 12.72 | 12.77 | 12.83 | 12.83 | 12.79 | 12.76 | 12.72 | 12.72 | 12.77 | 12.77 | 12.54 |
| 6.13  | 12.27 | 12.17 | 12.20 | 12.26 | 12.18 | 12.28 | 12.29 | 12.30 | 12.23 | 12.24 | 12.17 |
| 6.25  | 12.17 | 12.06 | 12.08 | 12.24 | 12.11 | 12.25 | 12.11 | 12.28 | 12.13 | 12.20 | 12.05 |
| 6.39  | 12.07 | 11.95 | 11.99 | 11.99 | 12.02 | 12.14 | 12.05 | 12.00 | 11.83 | 12.00 | 11.95 |
| 6.53  | 11.98 | 12.00 | 11.95 | 11.98 | 12.07 | 12.04 | 12.09 | 11.94 | 11.87 | 11.98 | 12.00 |
| 6.69  | 12.33 | 12.24 | 12.35 | 12.22 | 12.33 | 12.26 | 12.29 | 12.27 | 12.27 | 12.22 | 12.10 |
| 6.85  | 12.03 | 12.07 | 12.06 | 12.07 | 12.11 | 12.06 | 12.18 | 12.08 | 11.99 | 11.95 | 12.01 |
| 7.03  | 12.09 | 12.03 | 12.01 | 12.13 | 12.11 | 12.13 | 12.10 | 12.13 | 12.01 | 12.26 | 12.11 |
| 7.21  | 12.31 | 12.23 | 12.35 | 12.22 | 12.40 | 12.21 | 12.29 | 12.26 | 12.20 | 12.21 | 12.11 |
| 7.41  | 12.35 | 12.29 | 12.27 | 12.27 | 12.38 | 12.31 | 12.28 | 12.33 | 12.14 | 12.20 | 12.15 |
| 7.63  | 12.48 | 12.47 | 12.56 | 12.44 | 12.54 | 12.50 | 12.58 | 12.55 | 12.38 | 12.49 | 12.39 |
| 7.86  | 12.20 | 12.24 | 12.27 | 12.19 | 12.20 | 12.31 | 12.20 | 12.22 | 12.12 | 12.29 | 12.07 |
| 8.10  | 12.27 | 12.29 | 12.29 | 12.21 | 12.24 | 12.20 | 12.25 | 12.27 | 12.23 | 12.10 | 12.15 |
| 8.36  | 11.73 | 11.82 | 11.84 | 11.94 | 11.93 | 11.86 | 11.91 | 11.89 | 11.78 | 11.78 | 11.84 |
| 8.64  | 12.10 | 12.07 | 12.04 | 12.15 | 12.19 | 12.27 | 12.20 | 12.20 | 12.28 | 12.12 | 12.06 |
| 8.94  | 12.39 | 12.37 | 12.46 | 12.43 | 12.43 | 12.42 | 12.37 | 12.25 | 12.33 | 12.25 | 12.23 |
| 9.26  | 12.49 | 12.51 | 12.56 | 12.56 | 12.60 | 12.49 | 12.51 | 12.53 | 12.34 | 12.46 | 12.37 |
| 9.60  | 12.25 | 12.32 | 12.23 | 12.22 | 12.25 | 12.26 | 12.30 | 12.21 | 12.07 | 12.19 | 12.12 |
| 9.97  | 12.21 | 12.19 | 12.14 | 12.28 | 12.10 | 12.30 | 12.30 | 12.19 | 12.16 | 12.31 | 12.17 |
| 10.36 | 12.33 | 12.49 | 12.59 | 12.45 | 12.39 | 12.55 | 12.45 | 12.45 | 12.35 | 12.34 | 12.36 |
| 10.77 | 12.17 | 12.26 | 12.17 | 12.43 | 12.30 | 12.36 | 12.28 | 12.34 | 12.24 | 12.37 | 12.36 |
| 11.22 | 11.91 | 11.99 | 12.11 | 12.06 | 12.07 | 12.00 | 11.93 | 11.95 | 11.95 | 11.94 | 11.93 |
| 11.70 | 12.26 | 12.39 | 12.34 | 12.25 | 12.34 | 12.25 | 12.27 | 12.40 | 12.22 | 12.27 | 12.19 |
| 12.21 | 12.04 | 12.01 | 12.05 | 12.10 | 12.12 | 12.04 | 11.97 | 11.96 | 11.99 | 11.87 | 11.88 |
| 12.75 | 12.20 | 12.18 | 12.35 | 12.21 | 12.20 | 12.32 | 12.32 | 12.31 | 12.26 | 12.29 | 12.16 |
| 13.33 | 12.36 | 12.37 | 12.40 | 12.40 | 12.36 | 12.47 | 12.55 | 12.33 | 12.21 | 12.28 | 12.42 |
| 13.95 | 12.16 | 12.19 | 11.96 | 12.16 | 12.30 | 12.15 | 12.13 | 12.18 | 12.01 | 12.08 | 12.06 |
| 14.62 | 12.05 | 12.12 | 12.02 | 12.14 | 12.01 | 11.96 | 11.99 | 12.06 | 12.03 | 11.99 | 11.94 |
| 15.33 | 11.83 | 11.95 | 11.87 | 11.90 | 11.78 | 11.95 | 11.91 | 11.88 | 11.84 | 11.97 | 11.92 |
| 16.09 | 12.14 | 12.00 | 12.06 | 12.03 | 12.06 | 11.99 | 12.13 | 11.88 | 12.08 | 11.92 | 11.90 |
| 16.90 | 12.12 | 12.06 | 12.09 | 12.11 | 12.09 | 12.11 | 12.07 | 12.16 | 12.19 | 12.13 | 12.10 |
| 17.77 | 11.90 | 11.93 | 11.91 | 11.95 | 12.01 | 12.01 | 11.97 | 11.83 | 11.81 | 11.79 | 11.86 |
| 18.70 | 11.88 | 11.84 | 11.79 | 11.87 | 11.81 | 11.85 | 11.88 | 11.76 | 11.84 | 11.85 | 11.81 |
| 19.69 | 12.05 | 12.08 | 12.14 | 12.08 | 11.98 | 12.09 | 12.07 | 12.01 | 12.07 | 12.10 | 11.95 |
| 20.75 | 11.91 | 11.95 | 11.90 | 11.96 | 11.89 | 11.95 | 12.00 | 11.92 | 11.97 | 11.92 | 11.86 |
| 21.89 | 12.26 | 12.26 | 12.29 | 12.30 | 12.22 | 12.29 | 12.23 | 12.28 | 12.25 | 12.16 | 12.26 |
| 23.10 | 12.52 | 12.55 | 12.54 | 12.51 | 12.50 | 12.58 | 12.48 | 12.44 | 12.34 | 12.46 | 12.30 |
| 24.39 | 12.00 | 11.96 | 12.07 | 12.03 | 11.95 | 12.07 | 11.86 | 11.75 | 11.76 | 11.80 | 11.75 |
| 25.78 | 12.17 | 12.23 | 12.23 | 12.12 | 12.22 | 12.18 | 12.15 | 12.21 | 12.04 | 12.06 | 12.09 |
| 27.26 | 12.12 | 12.10 | 12.12 | 12.09 | 12.21 | 12.09 | 12.18 | 12.00 | 11.96 | 11.95 | 12.03 |
| 28.84 | 12.20 | 12.05 | 12.18 | 12.20 | 12.19 | 12.10 | 12.12 | 12.18 | 12.14 | 12.10 | 11.97 |
| 30.53 | 12.12 | 12.18 | 12.04 | 12.09 | 12.08 | 12.07 | 12.12 | 12.00 | 12.00 | 11.96 | 11.91 |
| 32.34 | 11.96 | 11.96 | 11.91 | 11.97 | 11.93 | 11.91 | 11.94 | 11.94 | 11.76 | 11.83 | 11.82 |
| 34.27 | 12.09 | 12.16 | 12.14 | 12.01 | 12.07 | 12.14 | 12.08 | 12.08 | 12.01 | 12.04 | 11.85 |
| 36.34 | 11.95 | 11.95 | 12.04 | 12.02 | 11.96 | 12.03 | 11.98 | 11.86 | 11.83 | 11.94 | 11.90 |
| 38.55 | 12.25 | 12.20 | 12.27 | 12.16 | 12.18 | 12.20 | 12.16 | 12.15 | 12.14 | 12.05 | 12.04 |
| 40.91 | 12.02 | 12.05 | 11.95 | 11.98 | 12.03 | 11.96 | 11.86 | 11.98 | 11.81 | 11.80 | 11.88 |

|         |       |       |       |       |       |       |       |       |       |       |       |
|---------|-------|-------|-------|-------|-------|-------|-------|-------|-------|-------|-------|
| 43.43   | 11.80 | 11.76 | 11.71 | 11.89 | 11.80 | 11.71 | 11.78 | 11.77 | 11.57 | 11.62 | 11.55 |
| 46.13   | 11.92 | 11.96 | 11.91 | 11.89 | 11.95 | 11.89 | 11.86 | 11.89 | 11.65 | 11.74 | 11.77 |
| 49.01   | 12.16 | 12.27 | 12.35 | 12.23 | 12.25 | 12.21 | 12.14 | 12.20 | 12.07 | 12.07 | 11.97 |
| 52.09   | 11.94 | 12.02 | 12.03 | 11.90 | 12.07 | 11.96 | 11.94 | 11.91 | 11.94 | 11.88 | 11.81 |
| 55.39   | 11.95 | 11.92 | 11.98 | 11.87 | 11.96 | 12.01 | 11.98 | 11.79 | 11.85 | 11.77 | 11.79 |
| 58.91   | 11.88 | 11.88 | 11.89 | 11.85 | 11.92 | 11.84 | 11.86 | 11.77 | 11.70 | 11.81 | 11.75 |
| 62.68   | 12.04 | 12.10 | 12.18 | 11.95 | 11.99 | 12.11 | 11.99 | 11.94 | 11.79 | 11.90 | 11.88 |
| 66.70   | 12.14 | 12.07 | 12.08 | 12.09 | 12.16 | 12.14 | 11.99 | 11.95 | 11.94 | 12.00 | 11.86 |
| 71.00   | 12.10 | 12.03 | 12.06 | 12.02 | 11.93 | 12.08 | 11.98 | 11.97 | 11.97 | 11.89 | 11.96 |
| 75.60   | 11.88 | 12.06 | 11.93 | 11.95 | 12.00 | 11.93 | 11.91 | 11.90 | 11.69 | 11.81 | 11.84 |
| 80.51   | 12.31 | 12.29 | 12.28 | 12.20 | 12.32 | 12.27 | 12.28 | 12.17 | 12.11 | 12.18 | 12.17 |
| 85.77   | 12.28 | 12.33 | 12.32 | 12.23 | 12.28 | 12.27 | 12.20 | 12.34 | 12.21 | 12.25 | 12.22 |
| 91.38   | 12.34 | 12.36 | 12.41 | 12.34 | 12.32 | 12.33 | 12.37 | 12.33 | 12.04 | 12.13 | 12.08 |
| 97.39   | 12.07 | 12.03 | 12.15 | 12.10 | 12.16 | 12.08 | 12.08 | 12.00 | 11.91 | 11.96 | 11.99 |
| 103.80  | 12.53 | 12.64 | 12.67 | 12.61 | 12.53 | 12.48 | 12.45 | 12.53 | 12.48 | 12.45 | 12.33 |
| 110.66  | 12.25 | 12.28 | 12.17 | 12.17 | 12.22 | 12.04 | 12.03 | 12.05 | 11.95 | 11.87 | 11.85 |
| 117.99  | 12.02 | 12.05 | 12.03 | 12.07 | 11.99 | 12.02 | 11.99 | 11.91 | 11.86 | 11.74 | 11.84 |
| 125.83  | 12.42 | 12.44 | 12.46 | 12.37 | 12.44 | 12.41 | 12.34 | 12.24 | 12.16 | 12.20 | 12.16 |
| 134.21  | 12.26 | 12.28 | 12.29 | 12.11 | 12.26 | 12.19 | 12.20 | 12.10 | 12.09 | 12.04 | 11.95 |
| 143.17  | 12.19 | 12.22 | 12.16 | 12.15 | 12.08 | 12.19 | 12.11 | 12.07 | 11.88 | 12.03 | 11.93 |
| 152.74  | 12.36 | 12.39 | 12.34 | 12.36 | 12.40 | 12.16 | 12.26 | 12.15 | 12.04 | 12.14 | 11.96 |
| 162.97  | 12.35 | 12.35 | 12.37 | 12.36 | 12.29 | 12.22 | 12.26 | 12.21 | 12.03 | 12.18 | 12.06 |
| 173.91  | 12.36 | 12.36 | 12.31 | 12.39 | 12.32 | 12.27 | 12.20 | 12.25 | 12.04 | 12.14 | 11.95 |
| 185.60  | 12.59 | 12.51 | 12.47 | 12.35 | 12.44 | 12.41 | 12.38 | 12.31 | 12.20 | 12.18 | 12.00 |
| 198.10  | 12.40 | 12.41 | 12.42 | 12.35 | 12.29 | 12.30 | 12.20 | 12.25 | 12.20 | 12.16 | 12.05 |
| 211.46  | 12.63 | 12.63 | 12.61 | 12.60 | 12.60 | 12.61 | 12.51 | 12.41 | 12.37 | 12.40 | 12.34 |
| 225.75  | 12.51 | 12.47 | 12.40 | 12.50 | 12.32 | 12.43 | 12.36 | 12.32 | 12.19 | 12.21 | 12.05 |
| 241.01  | 12.44 | 12.54 | 12.49 | 12.40 | 12.45 | 12.27 | 12.35 | 12.25 | 12.20 | 12.16 | 12.07 |
| 257.33  | 12.43 | 12.45 | 12.43 | 12.35 | 12.39 | 12.29 | 12.41 | 12.24 | 12.11 | 12.19 | 12.05 |
| 274.77  | 12.52 | 12.49 | 12.58 | 12.47 | 12.47 | 12.35 | 12.30 | 12.29 | 12.29 | 12.23 | 12.04 |
| 293.42  | 12.58 | 12.62 | 12.56 | 12.48 | 12.48 | 12.44 | 12.47 | 12.33 | 12.22 | 12.17 | 12.02 |
| 313.35  | 12.37 | 12.36 | 12.32 | 12.39 | 12.33 | 12.20 | 12.10 | 12.13 | 12.00 | 11.96 | 11.78 |
| 334.66  | 12.62 | 12.53 | 12.50 | 12.52 | 12.51 | 12.42 | 12.34 | 12.34 | 12.22 | 12.07 | 12.12 |
| 357.43  | 12.61 | 12.47 | 12.54 | 12.66 | 12.50 | 12.49 | 12.43 | 12.47 | 12.33 | 12.29 | 12.28 |
| 381.78  | 12.23 | 12.31 | 12.21 | 12.24 | 12.21 | 12.20 | 12.02 | 12.01 | 11.83 | 11.95 | 11.73 |
| 407.80  | 12.42 | 12.42 | 12.31 | 12.25 | 12.29 | 12.30 | 12.17 | 12.25 | 11.99 | 11.93 | 12.03 |
| 435.62  | 12.36 | 12.39 | 12.24 | 12.20 | 12.26 | 12.21 | 12.13 | 12.20 | 11.92 | 11.86 | 11.86 |
| 465.35  | 12.44 | 12.39 | 12.25 | 12.32 | 12.21 | 12.29 | 12.12 | 12.10 | 12.01 | 11.93 | 11.93 |
| 497.14  | 12.34 | 12.23 | 12.25 | 12.17 | 12.28 | 12.09 | 12.18 | 11.99 | 11.95 | 12.08 | 11.88 |
| 531.11  | 12.09 | 12.06 | 11.99 | 11.90 | 11.89 | 11.84 | 11.80 | 11.70 | 11.75 | 11.68 | 11.59 |
| 567.43  | 12.16 | 12.24 | 12.24 | 12.16 | 12.11 | 12.01 | 11.88 | 11.91 | 11.84 | 11.70 | 11.58 |
| 606.26  | 12.30 | 12.37 | 12.30 | 12.20 | 12.32 | 12.24 | 12.18 | 12.14 | 12.08 | 12.03 | 11.86 |
| 647.76  | 12.27 | 12.20 | 12.20 | 12.26 | 12.21 | 12.11 | 11.94 | 12.02 | 11.69 | 11.85 | 11.73 |
| 692.12  | 11.91 | 11.90 | 11.87 | 11.76 | 11.70 | 11.60 | 11.65 | 11.55 | 11.40 | 11.45 | 11.37 |
| 739.53  | 12.24 | 12.15 | 12.17 | 12.18 | 12.14 | 12.03 | 12.01 | 11.98 | 11.82 | 11.75 | 11.67 |
| 790.22  | 11.96 | 11.99 | 11.91 | 11.82 | 11.98 | 11.79 | 11.90 | 11.66 | 11.57 | 11.62 | 11.45 |
| 844.40  | 12.16 | 12.08 | 12.01 | 12.07 | 12.08 | 11.99 | 12.05 | 11.91 | 11.70 | 11.85 | 11.77 |
| 902.32  | 12.05 | 12.05 | 12.00 | 11.88 | 12.00 | 11.84 | 11.82 | 11.83 | 11.69 | 11.63 | 11.57 |
| 964.23  | 11.75 | 11.71 | 11.66 | 11.53 | 11.68 | 11.50 | 11.55 | 11.49 | 11.43 | 11.23 | 11.25 |
| 1030.41 | 12.03 | 12.03 | 11.92 | 11.81 | 11.87 | 11.86 | 11.80 | 11.70 | 11.53 | 11.49 | 11.38 |

|         |       |       |       |       |       |       |       |       |       |       |       |
|---------|-------|-------|-------|-------|-------|-------|-------|-------|-------|-------|-------|
| 1101.15 | 11.77 | 11.71 | 11.74 | 11.75 | 11.65 | 11.56 | 11.49 | 11.50 | 11.36 | 11.26 | 11.15 |
| 1176.77 | 11.80 | 11.87 | 11.74 | 11.67 | 11.67 | 11.56 | 11.52 | 11.45 | 11.38 | 11.24 | 11.07 |
| 1257.60 | 11.83 | 11.75 | 11.84 | 11.64 | 11.69 | 11.60 | 11.48 | 11.47 | 11.26 | 11.26 | 11.20 |
| 1344.00 | 11.73 | 11.72 | 11.63 | 11.52 | 11.48 | 11.43 | 11.40 | 11.26 | 11.15 | 11.05 | 11.08 |
| 1436.36 | 11.57 | 11.48 | 11.48 | 11.51 | 11.43 | 11.34 | 11.31 | 11.30 | 11.21 | 11.02 | 11.08 |
| 1535.09 | 11.56 | 11.54 | 11.56 | 11.51 | 11.31 | 11.31 | 11.20 | 11.30 | 11.14 | 11.04 | 10.79 |
| 1640.63 | 11.38 | 11.47 | 11.39 | 11.34 | 11.23 | 11.26 | 11.09 | 11.09 | 11.00 | 11.08 | 10.91 |
| 1753.44 | 11.37 | 11.35 | 11.26 | 11.28 | 11.17 | 11.12 | 11.03 | 11.01 | 10.83 | 10.79 | 10.65 |
| 1874.02 | 11.17 | 11.26 | 11.14 | 11.06 | 11.06 | 10.97 | 10.86 | 10.85 | 10.79 | 10.85 | 10.86 |
| 2002.92 | 11.29 | 11.29 | 11.20 | 11.17 | 11.19 | 11.10 | 10.93 | 10.99 | 10.78 | 10.76 | 10.66 |
| 2140.71 | 11.14 | 11.19 | 11.11 | 11.05 | 10.98 | 10.93 | 10.89 | 10.82 | 10.61 | 10.65 | 10.62 |
| 2288.00 | 11.01 | 11.00 | 11.01 | 10.95 | 10.97 | 10.78 | 10.73 | 10.69 | 10.58 | 10.51 | 10.42 |
| 2445.44 | 10.98 | 10.96 | 10.93 | 10.81 | 10.82 | 10.72 | 10.70 | 10.60 | 10.43 | 10.47 | 10.35 |
| 2613.73 | 10.91 | 10.82 | 10.77 | 10.91 | 10.77 | 10.74 | 10.61 | 10.57 | 10.45 | 10.40 | 10.28 |
| 2793.63 | 10.67 | 10.56 | 10.54 | 10.46 | 10.50 | 10.30 | 10.28 | 10.31 | 10.16 | 10.05 | 10.00 |
| 2985.93 | 10.44 | 10.27 | 10.31 | 10.37 | 10.31 | 10.20 | 10.05 | 10.05 | 9.91  | 9.92  | 9.83  |
| 3191.49 | 10.16 | 10.16 | 10.12 | 10.06 | 9.97  | 10.03 | 9.93  | 9.82  | 9.69  | 9.63  | 9.50  |
| 3411.21 | 10.08 | 9.96  | 9.84  | 9.86  | 9.82  | 9.74  | 9.74  | 9.52  | 9.30  | 9.22  | 9.22  |
| 3646.09 | 9.69  | 9.83  | 9.57  | 9.57  | 9.54  | 9.43  | 9.34  | 9.32  | 9.08  | 9.13  | 8.99  |
| 3897.16 | 9.57  | 9.40  | 9.34  | 9.39  | 9.40  | 9.14  | 9.12  | 9.19  | 8.84  | 8.81  | 8.71  |

| Wavelength (nm) \ Time (ps) | 647.38 | 648.80 | 650.23 | 651.65 | 653.08 | 654.50 | 655.93 | 657.35 | 658.77 | 660.20 | 661.62 |
|-----------------------------|--------|--------|--------|--------|--------|--------|--------|--------|--------|--------|--------|
| -2.74                       | -0.06  | -0.02  | 0.01   | 0.02   | -0.04  | -0.15  | -0.18  | -0.06  | -0.19  | -0.08  | -0.06  |
| -2.24                       | -0.01  | -0.04  | -0.11  | -0.15  | -0.08  | -0.26  | -0.19  | -0.27  | -0.27  | -0.38  | -0.37  |
| -1.74                       | 0.09   | 0.10   | 0.14   | 0.12   | 0.23   | 0.29   | 0.27   | 0.07   | 0.12   | 0.08   | 0.05   |
| -1.24                       | 0.03   | 0.00   | -0.01  | 0.10   | -0.02  | 0.05   | 0.04   | 0.23   | 0.23   | 0.23   | 0.19   |
| -0.74                       | 0.09   | 0.05   | -0.01  | -0.08  | -0.21  | -0.13  | 0.00   | -0.20  | -0.21  | -0.05  | -0.11  |
| -0.24                       | -0.06  | -0.04  | 0.05   | -0.06  | 0.03   | -0.01  | -0.03  | 0.04   | 0.14   | 0.03   | 0.01   |
| -0.14                       | -0.12  | -0.06  | -0.02  | 0.04   | 0.05   | 0.14   | 0.14   | 0.19   | 0.18   | 0.22   | 0.18   |
| -0.04                       | 0.05   | 0.00   | -0.04  | 0.02   | 0.04   | 0.08   | -0.05  | -0.01  | 0.00   | -0.05  | 0.12   |
| 0.06                        | -0.03  | 0.01   | -0.01  | -0.07  | 0.01   | 0.09   | -0.01  | -0.03  | 0.11   | 0.21   | 0.19   |
| 0.16                        | 0.05   | 0.07   | 0.10   | 0.08   | 0.08   | 0.15   | -0.05  | -0.20  | -0.10  | -0.19  | -0.23  |
| 0.26                        | 0.04   | -0.12  | -0.04  | 0.02   | 0.06   | -0.04  | -0.02  | 0.05   | -0.06  | -0.07  | -0.16  |
| 0.31                        | 0.06   | 0.04   | 0.04   | 0.06   | 0.04   | 0.02   | 0.14   | -0.03  | 0.10   | 0.04   | 0.08   |
| 0.36                        | -0.05  | -0.04  | -0.03  | -0.05  | -0.13  | -0.09  | 0.01   | -0.04  | 0.02   | -0.04  | 0.01   |
| 0.41                        | -0.02  | -0.04  | 0.00   | 0.21   | 0.13   | 0.00   | 0.26   | 0.23   | 0.16   | 0.27   | 0.25   |
| 0.46                        | -0.06  | -0.01  | -0.12  | -0.09  | -0.03  | 0.07   | -0.06  | -0.11  | -0.01  | -0.07  | 0.04   |
| 0.51                        | 0.04   | -0.07  | -0.02  | 0.15   | 0.12   | 0.01   | -0.04  | -0.02  | -0.02  | 0.12   | -0.01  |
| 0.56                        | 0.03   | 0.00   | 0.01   | 0.01   | 0.00   | 0.04   | -0.01  | -0.08  | -0.01  | 0.13   | 0.04   |
| 0.61                        | -0.01  | -0.06  | -0.08  | -0.11  | -0.09  | -0.11  | -0.20  | -0.24  | -0.18  | -0.08  | -0.06  |
| 0.66                        | 0.06   | 0.05   | -0.07  | 0.01   | -0.02  | 0.18   | -0.01  | -0.06  | 0.08   | 0.16   | 0.06   |
| 0.71                        | -0.14  | -0.02  | 0.09   | 0.02   | 0.18   | -0.04  | 0.03   | 0.07   | -0.04  | 0.20   | 0.10   |
| 0.76                        | 0.00   | 0.06   | 0.18   | 0.07   | 0.01   | 0.09   | -0.05  | -0.05  | -0.15  | -0.12  | -0.17  |
| 0.81                        | 0.06   | -0.03  | 0.13   | 0.09   | 0.05   | 0.08   | -0.07  | -0.17  | -0.08  | 0.01   | -0.16  |
| 0.86                        | 0.18   | 0.12   | 0.23   | 0.23   | 0.32   | 0.24   | 0.25   | 0.25   | 0.38   | 0.32   | 0.35   |
| 0.91                        | -0.06  | 0.11   | 0.07   | 0.04   | -0.01  | -0.14  | -0.07  | -0.16  | -0.10  | -0.06  | -0.11  |
| 0.96                        | 0.00   | -0.06  | 0.05   | 0.01   | -0.10  | -0.09  | -0.10  | -0.16  | -0.05  | -0.15  | -0.12  |
| 1.01                        | -0.04  | 0.11   | -0.03  | 0.03   | 0.00   | -0.05  | -0.16  | -0.23  | -0.21  | -0.18  | -0.26  |



|      |        |       |       |       |       |       |        |        |        |        |        |
|------|--------|-------|-------|-------|-------|-------|--------|--------|--------|--------|--------|
| 1.06 | 0.03   | 0.00  | 0.11  | 0.08  | 0.13  | 0.02  | -0.07  | 0.09   | 0.11   | 0.22   | 0.05   |
| 1.11 | 0.00   | -0.08 | -0.06 | 0.04  | -0.12 | -0.09 | -0.14  | -0.08  | -0.12  | -0.09  | -0.02  |
| 1.16 | -0.01  | 0.06  | 0.00  | 0.12  | 0.17  | 0.06  | -0.01  | 0.06   | -0.09  | 0.12   | -0.06  |
| 1.21 | 0.11   | 0.31  | 0.15  | 0.21  | 0.15  | 0.11  | 0.12   | 0.13   | 0.12   | 0.03   | 0.09   |
| 1.26 | -0.06  | 0.20  | 0.03  | 0.03  | -0.12 | -0.15 | -0.07  | 0.01   | 0.03   | -0.20  | -0.27  |
| 1.31 | 0.34   | 0.40  | 0.32  | 0.10  | -0.07 | -0.08 | 0.29   | 0.30   | 0.30   | 0.14   | 0.00   |
| 1.36 | -10.59 | -9.78 | -8.62 | -6.85 | -4.87 | -2.63 | -0.25  | 1.54   | 2.96   | 3.51   | 3.38   |
| 1.41 | 41.60  | 38.32 | 35.80 | 34.65 | 34.38 | 35.05 | 37.15  | 40.39  | 44.73  | 49.35  | 53.49  |
| 1.46 | 86.12  | 86.75 | 86.75 | 87.57 | 85.92 | 83.46 | 80.89  | 78.61  | 76.67  | 76.80  | 76.18  |
| 1.51 | 5.26   | 3.30  | 0.93  | -1.54 | -4.36 | -7.54 | -10.89 | -14.54 | -18.83 | -23.24 | -27.58 |
| 1.56 | 21.29  | 21.10 | 21.05 | 20.58 | 20.20 | 19.57 | 19.09  | 18.72  | 18.95  | 19.58  | 20.21  |
| 1.61 | 15.70  | 16.35 | 17.69 | 18.65 | 19.16 | 18.98 | 18.39  | 17.89  | 18.04  | 19.09  | 20.17  |
| 1.66 | 14.20  | 13.96 | 13.63 | 13.44 | 13.43 | 13.42 | 13.68  | 14.05  | 14.38  | 14.86  | 15.04  |
| 1.71 | 16.39  | 16.71 | 16.89 | 16.87 | 16.71 | 16.78 | 16.78  | 16.51  | 16.23  | 16.26  | 16.24  |
| 1.76 | 12.54  | 12.69 | 12.78 | 13.18 | 13.61 | 13.87 | 14.35  | 14.69  | 14.96  | 15.52  | 15.73  |
| 1.81 | 14.67  | 14.30 | 13.97 | 13.73 | 13.53 | 13.30 | 13.36  | 13.33  | 13.45  | 13.44  | 13.93  |
| 1.86 | 15.69  | 15.98 | 16.03 | 16.15 | 16.07 | 16.20 | 16.02  | 15.91  | 15.75  | 15.71  | 15.55  |
| 1.91 | 11.90  | 11.72 | 11.70 | 11.78 | 11.86 | 12.14 | 12.49  | 12.70  | 13.13  | 13.55  | 13.79  |
| 1.96 | 14.71  | 14.67 | 14.50 | 14.39 | 14.03 | 13.94 | 13.68  | 13.56  | 13.57  | 13.72  | 13.75  |
| 2.01 | 13.42  | 13.80 | 14.19 | 14.67 | 14.80 | 15.11 | 15.30  | 15.52  | 15.56  | 15.65  | 15.65  |
| 2.06 | 13.15  | 13.06 | 12.76 | 12.64 | 12.42 | 12.38 | 12.35  | 12.49  | 12.67  | 12.88  | 13.12  |
| 2.11 | 14.91  | 15.02 | 14.91 | 14.81 | 14.76 | 14.53 | 14.31  | 14.24  | 14.29  | 14.13  | 14.04  |
| 2.16 | 12.14  | 12.38 | 12.50 | 12.70 | 12.91 | 13.07 | 13.34  | 13.58  | 13.70  | 13.96  | 14.04  |
| 2.21 | 13.64  | 13.32 | 13.17 | 13.02 | 12.89 | 12.85 | 12.93  | 12.94  | 13.10  | 13.20  | 13.33  |
| 2.26 | 14.33  | 14.54 | 14.54 | 14.68 | 14.67 | 14.74 | 14.67  | 14.67  | 14.68  | 14.56  | 14.49  |
| 2.31 | 11.98  | 11.90 | 12.04 | 11.88 | 12.00 | 12.22 | 12.34  | 12.66  | 12.81  | 13.13  | 13.29  |
| 2.36 | 13.51  | 13.51 | 13.33 | 13.33 | 13.23 | 13.24 | 13.31  | 13.44  | 13.58  | 13.66  | 13.82  |
| 2.41 | 13.34  | 13.60 | 13.89 | 13.95 | 14.24 | 14.27 | 14.41  | 14.47  | 14.58  | 14.56  | 14.44  |
| 2.46 | 12.10  | 12.03 | 12.07 | 11.92 | 11.93 | 12.01 | 12.07  | 12.24  | 12.37  | 12.56  | 12.65  |
| 2.51 | 14.58  | 14.66 | 14.71 | 14.65 | 14.58 | 14.55 | 14.34  | 14.33  | 14.27  | 14.31  | 14.11  |
| 2.56 | 12.45  | 12.43 | 12.60 | 12.76 | 12.93 | 12.97 | 13.19  | 13.28  | 13.34  | 13.51  | 13.66  |
| 2.61 | 12.44  | 12.33 | 12.41 | 12.31 | 12.36 | 12.27 | 12.40  | 12.60  | 12.69  | 12.72  | 12.87  |
| 2.66 | 13.86  | 13.91 | 13.78 | 13.97 | 13.79 | 13.75 | 13.51  | 13.69  | 13.50  | 13.42  | 13.47  |
| 2.71 | 11.92  | 12.03 | 12.08 | 12.26 | 12.37 | 12.40 | 12.51  | 12.77  | 12.83  | 13.08  | 13.09  |
| 2.76 | 13.05  | 13.04 | 12.97 | 12.80 | 12.77 | 12.84 | 12.82  | 12.79  | 12.76  | 12.77  | 12.94  |
| 2.81 | 13.01  | 13.27 | 13.27 | 13.42 | 13.40 | 13.56 | 13.54  | 13.56  | 13.63  | 13.56  | 13.51  |
| 2.86 | 12.22  | 12.26 | 12.32 | 12.40 | 12.42 | 12.58 | 12.83  | 12.98  | 13.13  | 13.32  | 13.49  |
| 2.91 | 13.54  | 13.55 | 13.37 | 13.39 | 13.39 | 13.18 | 13.15  | 13.20  | 13.05  | 12.94  | 12.88  |
| 2.96 | 12.73  | 12.86 | 12.92 | 13.09 | 13.12 | 13.18 | 13.32  | 13.38  | 13.49  | 13.59  | 13.65  |
| 3.01 | 12.61  | 12.61 | 12.58 | 12.52 | 12.47 | 12.48 | 12.52  | 12.61  | 12.68  | 12.87  | 13.08  |
| 3.06 | 12.85  | 12.94 | 13.06 | 12.95 | 12.96 | 13.07 | 13.03  | 13.09  | 13.05  | 13.11  | 13.14  |
| 3.11 | 12.13  | 12.30 | 12.27 | 12.37 | 12.47 | 12.61 | 12.79  | 12.85  | 12.97  | 13.13  | 13.25  |
| 3.16 | 12.80  | 12.64 | 12.68 | 12.67 | 12.51 | 12.42 | 12.38  | 12.56  | 12.43  | 12.62  | 12.68  |
| 3.21 | 12.65  | 12.59 | 12.50 | 12.51 | 12.59 | 12.58 | 12.46  | 12.56  | 12.49  | 12.57  | 12.50  |
| 3.26 | 11.97  | 12.03 | 11.95 | 12.17 | 12.14 | 12.12 | 12.42  | 12.44  | 12.64  | 12.71  | 12.86  |
| 3.31 | 12.82  | 12.79 | 12.70 | 12.66 | 12.59 | 12.52 | 12.46  | 12.52  | 12.60  | 12.53  | 12.43  |
| 3.36 | 12.59  | 12.68 | 12.58 | 12.72 | 12.72 | 12.85 | 12.98  | 12.98  | 13.07  | 13.25  | 13.15  |
| 3.41 | 12.22  | 12.30 | 12.24 | 12.23 | 12.15 | 12.18 | 12.30  | 12.42  | 12.42  | 12.67  | 12.79  |
| 3.46 | 12.74  | 12.82 | 12.74 | 12.74 | 12.68 | 12.55 | 12.41  | 12.50  | 12.43  | 12.50  | 12.53  |
| 3.51 | 12.14  | 12.25 | 12.29 | 12.40 | 12.47 | 12.57 | 12.71  | 12.82  | 12.97  | 13.05  | 13.22  |

|      |       |       |       |       |       |       |       |       |       |       |       |
|------|-------|-------|-------|-------|-------|-------|-------|-------|-------|-------|-------|
| 3.56 | 12.42 | 12.40 | 12.31 | 12.16 | 12.20 | 12.02 | 12.19 | 12.18 | 12.19 | 12.15 | 12.28 |
| 3.61 | 12.61 | 12.71 | 12.70 | 12.79 | 12.71 | 12.92 | 12.85 | 12.84 | 12.92 | 12.97 | 13.03 |
| 3.66 | 11.92 | 11.84 | 11.84 | 11.94 | 12.07 | 12.16 | 12.07 | 12.18 | 12.29 | 12.43 | 12.55 |
| 3.71 | 13.06 | 12.92 | 12.84 | 12.80 | 12.79 | 12.72 | 12.77 | 12.73 | 12.84 | 12.83 | 12.90 |
| 3.76 | 12.92 | 12.98 | 12.81 | 12.86 | 12.94 | 12.97 | 12.76 | 12.92 | 12.95 | 13.06 | 12.96 |
| 3.81 | 11.96 | 11.91 | 11.91 | 11.91 | 12.05 | 11.88 | 11.87 | 11.93 | 12.11 | 12.11 | 12.31 |
| 3.86 | 12.43 | 12.49 | 12.42 | 12.43 | 12.51 | 12.47 | 12.61 | 12.57 | 12.57 | 12.70 | 12.71 |
| 3.91 | 12.34 | 12.41 | 12.43 | 12.56 | 12.57 | 12.57 | 12.63 | 12.79 | 12.97 | 13.12 | 13.20 |
| 3.96 | 12.30 | 12.31 | 12.32 | 12.24 | 12.38 | 12.39 | 12.40 | 12.56 | 12.60 | 12.71 | 12.77 |
| 4.01 | 12.69 | 12.68 | 12.76 | 12.70 | 12.69 | 12.85 | 12.73 | 12.77 | 12.76 | 12.81 | 12.81 |
| 4.06 | 12.50 | 12.44 | 12.55 | 12.43 | 12.50 | 12.57 | 12.50 | 12.66 | 12.68 | 12.85 | 12.89 |
| 4.11 | 12.51 | 12.58 | 12.35 | 12.33 | 12.43 | 12.44 | 12.48 | 12.57 | 12.67 | 12.66 | 12.74 |
| 4.16 | 12.52 | 12.65 | 12.62 | 12.64 | 12.68 | 12.65 | 12.62 | 12.70 | 12.79 | 12.77 | 12.60 |
| 4.21 | 12.52 | 12.59 | 12.63 | 12.69 | 12.73 | 12.79 | 12.80 | 12.94 | 13.11 | 13.13 | 13.23 |
| 4.26 | 12.46 | 12.49 | 12.39 | 12.50 | 12.56 | 12.50 | 12.49 | 12.61 | 12.62 | 12.61 | 12.64 |
| 4.31 | 12.06 | 12.24 | 12.32 | 12.30 | 12.39 | 12.47 | 12.57 | 12.66 | 12.80 | 12.95 | 13.07 |
| 4.36 | 12.21 | 12.21 | 12.29 | 12.32 | 12.35 | 12.35 | 12.43 | 12.52 | 12.62 | 12.84 | 12.79 |
| 4.41 | 12.25 | 12.33 | 12.43 | 12.37 | 12.44 | 12.44 | 12.47 | 12.56 | 12.60 | 12.78 | 12.74 |
| 4.46 | 12.29 | 12.45 | 12.36 | 12.36 | 12.44 | 12.50 | 12.54 | 12.49 | 12.55 | 12.89 | 12.79 |
| 4.51 | 12.34 | 12.47 | 12.42 | 12.47 | 12.50 | 12.50 | 12.66 | 12.60 | 12.70 | 12.85 | 12.97 |
| 4.56 | 12.43 | 12.37 | 12.50 | 12.40 | 12.38 | 12.43 | 12.43 | 12.46 | 12.51 | 12.50 | 12.51 |
| 4.61 | 12.13 | 12.18 | 12.18 | 12.21 | 12.25 | 12.28 | 12.35 | 12.53 | 12.53 | 12.54 | 12.56 |
| 4.66 | 12.55 | 12.53 | 12.42 | 12.40 | 12.45 | 12.41 | 12.44 | 12.53 | 12.59 | 12.72 | 12.61 |
| 4.71 | 12.36 | 12.41 | 12.47 | 12.54 | 12.49 | 12.47 | 12.43 | 12.45 | 12.42 | 12.50 | 12.43 |
| 4.76 | 12.50 | 12.47 | 12.48 | 12.40 | 12.52 | 12.53 | 12.65 | 12.58 | 12.74 | 12.93 | 12.98 |
| 4.81 | 12.41 | 12.45 | 12.36 | 12.17 | 12.16 | 12.25 | 12.16 | 12.21 | 12.31 | 12.31 | 12.28 |
| 4.86 | 12.33 | 12.22 | 12.44 | 12.28 | 12.40 | 12.38 | 12.34 | 12.34 | 12.53 | 12.46 | 12.67 |
| 4.91 | 12.48 | 12.59 | 12.55 | 12.54 | 12.58 | 12.66 | 12.72 | 12.84 | 12.92 | 13.08 | 13.07 |
| 4.96 | 12.52 | 12.57 | 12.47 | 12.67 | 12.65 | 12.61 | 12.61 | 12.68 | 12.76 | 12.85 | 12.87 |
| 5.01 | 12.13 | 11.97 | 12.08 | 12.07 | 12.16 | 12.11 | 12.18 | 12.24 | 12.24 | 12.27 | 12.44 |
| 5.06 | 12.60 | 12.55 | 12.54 | 12.57 | 12.55 | 12.51 | 12.58 | 12.65 | 12.79 | 12.84 | 12.93 |
| 5.11 | 12.48 | 12.24 | 12.23 | 12.42 | 12.37 | 12.39 | 12.39 | 12.48 | 12.46 | 12.69 | 12.72 |
| 5.16 | 12.19 | 12.14 | 12.17 | 12.21 | 12.16 | 12.32 | 12.37 | 12.39 | 12.48 | 12.62 | 12.62 |
| 5.21 | 12.27 | 12.29 | 12.28 | 12.50 | 12.43 | 12.56 | 12.69 | 12.68 | 12.83 | 12.91 | 13.05 |
| 5.26 | 12.36 | 12.46 | 12.40 | 12.37 | 12.40 | 12.35 | 12.49 | 12.53 | 12.66 | 12.75 | 12.60 |
| 5.31 | 12.39 | 12.33 | 12.33 | 12.37 | 12.41 | 12.37 | 12.36 | 12.43 | 12.57 | 12.49 | 12.70 |
| 5.38 | 12.43 | 12.38 | 12.50 | 12.45 | 12.55 | 12.58 | 12.58 | 12.63 | 12.73 | 12.85 | 12.79 |
| 5.45 | 12.44 | 12.50 | 12.56 | 12.42 | 12.59 | 12.67 | 12.69 | 12.73 | 12.70 | 12.92 | 13.01 |
| 5.53 | 12.50 | 12.33 | 12.36 | 12.39 | 12.37 | 12.38 | 12.46 | 12.48 | 12.56 | 12.71 | 12.76 |
| 5.61 | 12.41 | 12.32 | 12.50 | 12.43 | 12.55 | 12.47 | 12.70 | 12.42 | 12.55 | 12.62 | 12.77 |
| 5.70 | 12.28 | 12.40 | 12.36 | 12.31 | 12.31 | 12.44 | 12.37 | 12.32 | 12.51 | 12.55 | 12.50 |
| 5.80 | 12.39 | 12.48 | 12.52 | 12.53 | 12.61 | 12.59 | 12.57 | 12.60 | 12.77 | 12.78 | 13.00 |
| 5.90 | 12.17 | 12.24 | 12.22 | 12.26 | 12.22 | 12.36 | 12.38 | 12.36 | 12.40 | 12.52 | 12.53 |
| 6.01 | 12.57 | 12.67 | 12.63 | 12.75 | 12.59 | 12.64 | 12.62 | 12.53 | 12.71 | 12.61 | 12.57 |
| 6.13 | 12.23 | 12.18 | 12.13 | 12.02 | 12.20 | 12.17 | 12.20 | 12.25 | 12.36 | 12.35 | 12.45 |
| 6.25 | 12.01 | 12.09 | 12.04 | 11.91 | 12.04 | 12.01 | 12.04 | 12.07 | 12.07 | 12.14 | 12.27 |
| 6.39 | 12.10 | 11.96 | 12.04 | 11.97 | 12.02 | 12.06 | 12.06 | 12.17 | 12.39 | 12.38 | 12.44 |
| 6.53 | 11.98 | 11.98 | 11.97 | 11.99 | 12.07 | 12.20 | 12.18 | 12.24 | 12.33 | 12.49 | 12.54 |
| 6.69 | 12.16 | 12.02 | 12.12 | 12.06 | 11.95 | 11.88 | 12.11 | 12.06 | 12.03 | 12.09 | 12.06 |
| 6.85 | 12.02 | 12.03 | 12.08 | 12.04 | 12.13 | 12.13 | 12.23 | 12.16 | 12.33 | 12.37 | 12.31 |

|       |       |       |       |       |       |       |       |       |       |       |       |
|-------|-------|-------|-------|-------|-------|-------|-------|-------|-------|-------|-------|
| 7.03  | 12.07 | 12.06 | 12.16 | 12.22 | 12.18 | 12.32 | 12.27 | 12.34 | 12.48 | 12.56 | 12.56 |
| 7.21  | 12.16 | 12.26 | 12.27 | 12.16 | 12.10 | 12.18 | 12.04 | 12.21 | 12.34 | 12.23 | 12.42 |
| 7.41  | 12.09 | 12.17 | 12.16 | 12.13 | 12.11 | 12.22 | 12.19 | 12.18 | 12.21 | 12.37 | 12.26 |
| 7.63  | 12.39 | 12.51 | 12.39 | 12.35 | 12.46 | 12.43 | 12.46 | 12.58 | 12.71 | 12.84 | 12.80 |
| 7.86  | 11.98 | 12.09 | 12.01 | 12.04 | 12.04 | 11.98 | 12.01 | 12.16 | 12.20 | 12.25 | 12.13 |
| 8.10  | 12.12 | 12.11 | 12.18 | 12.12 | 12.20 | 12.32 | 12.13 | 12.34 | 12.37 | 12.48 | 12.43 |
| 8.36  | 11.76 | 11.89 | 11.94 | 11.94 | 11.95 | 11.83 | 12.03 | 11.97 | 12.25 | 12.24 | 12.32 |
| 8.64  | 11.96 | 12.03 | 11.96 | 12.05 | 12.09 | 12.12 | 12.12 | 12.13 | 12.20 | 12.32 | 12.34 |
| 8.94  | 12.16 | 12.21 | 12.14 | 12.10 | 12.11 | 12.22 | 12.24 | 12.19 | 12.26 | 12.24 | 12.27 |
| 9.26  | 12.42 | 12.41 | 12.31 | 12.24 | 12.40 | 12.36 | 12.41 | 12.43 | 12.45 | 12.64 | 12.59 |
| 9.60  | 11.96 | 12.11 | 12.09 | 12.00 | 12.14 | 12.14 | 12.08 | 12.11 | 12.16 | 12.20 | 12.18 |
| 9.97  | 12.37 | 12.25 | 12.26 | 12.38 | 12.45 | 12.42 | 12.50 | 12.57 | 12.61 | 12.68 | 12.69 |
| 10.36 | 12.29 | 12.27 | 12.30 | 12.36 | 12.23 | 12.15 | 12.36 | 12.28 | 12.33 | 12.48 | 12.35 |
| 10.77 | 12.30 | 12.29 | 12.29 | 12.36 | 12.33 | 12.41 | 12.46 | 12.57 | 12.64 | 12.69 | 12.80 |
| 11.22 | 11.93 | 11.90 | 11.84 | 11.93 | 11.91 | 11.84 | 11.76 | 11.93 | 11.97 | 12.07 | 12.12 |
| 11.70 | 12.13 | 12.09 | 12.13 | 12.06 | 12.07 | 12.02 | 11.98 | 12.02 | 12.04 | 12.15 | 12.06 |
| 12.21 | 11.94 | 11.96 | 11.93 | 11.86 | 11.81 | 11.79 | 11.89 | 11.82 | 11.76 | 11.81 | 11.84 |
| 12.75 | 12.17 | 12.19 | 12.19 | 12.14 | 12.25 | 12.26 | 12.19 | 12.15 | 12.28 | 12.35 | 12.41 |
| 13.33 | 12.23 | 12.17 | 12.30 | 12.22 | 12.22 | 12.28 | 12.25 | 12.26 | 12.43 | 12.45 | 12.51 |
| 13.95 | 12.00 | 11.98 | 11.98 | 12.03 | 11.82 | 11.80 | 11.91 | 12.00 | 12.02 | 11.95 | 12.10 |
| 14.62 | 11.97 | 12.00 | 11.99 | 11.89 | 11.88 | 11.89 | 11.99 | 11.95 | 11.98 | 11.98 | 12.09 |
| 15.33 | 11.76 | 11.88 | 11.84 | 11.93 | 11.88 | 11.95 | 12.00 | 11.99 | 12.08 | 12.09 | 12.16 |
| 16.09 | 11.86 | 11.89 | 12.02 | 12.00 | 11.90 | 11.83 | 11.90 | 11.93 | 11.95 | 11.90 | 12.07 |
| 16.90 | 12.02 | 12.09 | 12.20 | 12.06 | 12.19 | 12.36 | 12.30 | 12.22 | 12.47 | 12.52 | 12.69 |
| 17.77 | 11.82 | 11.86 | 11.81 | 11.75 | 11.76 | 11.72 | 11.80 | 11.85 | 11.91 | 11.97 | 11.92 |
| 18.70 | 11.75 | 11.85 | 11.78 | 11.86 | 11.96 | 11.85 | 11.80 | 11.99 | 11.99 | 12.11 | 12.13 |
| 19.69 | 11.91 | 12.04 | 11.94 | 11.96 | 11.96 | 12.00 | 12.10 | 12.13 | 12.28 | 12.15 | 12.31 |
| 20.75 | 11.82 | 11.83 | 11.81 | 11.85 | 11.76 | 11.85 | 11.86 | 12.00 | 11.92 | 12.07 | 12.09 |
| 21.89 | 12.15 | 12.21 | 12.20 | 12.10 | 12.21 | 12.18 | 12.22 | 12.20 | 12.35 | 12.48 | 12.44 |
| 23.10 | 12.24 | 12.28 | 12.33 | 12.30 | 12.23 | 12.24 | 12.42 | 12.33 | 12.29 | 12.33 | 12.35 |
| 24.39 | 11.78 | 11.63 | 11.76 | 11.71 | 11.65 | 11.77 | 11.68 | 11.72 | 11.77 | 12.01 | 11.94 |
| 25.78 | 11.93 | 12.10 | 11.97 | 12.12 | 12.17 | 11.98 | 12.18 | 12.24 | 12.38 | 12.39 | 12.44 |
| 27.26 | 11.84 | 11.95 | 11.89 | 11.87 | 11.90 | 11.95 | 11.97 | 12.04 | 12.05 | 12.11 | 12.06 |
| 28.84 | 12.03 | 12.03 | 12.06 | 12.08 | 12.00 | 12.22 | 12.09 | 12.12 | 12.31 | 12.31 | 12.36 |
| 30.53 | 11.88 | 11.84 | 11.93 | 11.76 | 11.78 | 12.00 | 11.80 | 11.95 | 12.05 | 11.99 | 12.07 |
| 32.34 | 11.76 | 11.75 | 11.70 | 11.74 | 11.72 | 11.75 | 11.82 | 11.81 | 11.85 | 11.93 | 12.01 |
| 34.27 | 11.85 | 11.81 | 11.84 | 11.95 | 11.83 | 11.87 | 11.87 | 11.87 | 11.95 | 11.87 | 12.03 |
| 36.34 | 11.88 | 11.86 | 11.75 | 11.92 | 11.87 | 11.87 | 11.93 | 12.02 | 11.98 | 12.06 | 12.01 |
| 38.55 | 12.04 | 12.03 | 12.06 | 12.06 | 12.02 | 12.07 | 12.06 | 12.16 | 12.33 | 12.27 | 12.33 |
| 40.91 | 11.87 | 11.74 | 11.87 | 11.80 | 11.74 | 11.78 | 11.65 | 11.83 | 11.87 | 12.02 | 11.97 |
| 43.43 | 11.53 | 11.49 | 11.47 | 11.47 | 11.54 | 11.33 | 11.34 | 11.52 | 11.43 | 11.47 | 11.59 |
| 46.13 | 11.65 | 11.67 | 11.64 | 11.57 | 11.67 | 11.58 | 11.42 | 11.60 | 11.69 | 11.72 | 11.76 |
| 49.01 | 11.93 | 12.05 | 12.05 | 12.05 | 12.05 | 11.99 | 12.05 | 12.08 | 12.14 | 12.38 | 12.23 |
| 52.09 | 11.87 | 11.82 | 11.95 | 11.85 | 11.87 | 11.94 | 12.03 | 12.07 | 12.16 | 12.28 | 12.33 |
| 55.39 | 11.67 | 11.85 | 11.64 | 11.63 | 11.73 | 11.65 | 11.60 | 11.68 | 11.68 | 11.87 | 11.83 |
| 58.91 | 11.74 | 11.60 | 11.69 | 11.73 | 11.65 | 11.64 | 11.55 | 11.65 | 11.58 | 11.69 | 11.75 |
| 62.68 | 11.78 | 11.83 | 11.84 | 11.91 | 11.82 | 11.81 | 11.95 | 11.95 | 12.02 | 12.07 | 12.10 |
| 66.70 | 11.88 | 12.00 | 11.88 | 11.85 | 11.79 | 11.88 | 11.80 | 11.83 | 11.86 | 11.90 | 12.06 |
| 71.00 | 11.79 | 11.77 | 11.93 | 11.79 | 11.74 | 11.89 | 11.88 | 11.81 | 11.93 | 11.90 | 11.99 |
| 75.60 | 11.65 | 11.74 | 11.66 | 11.68 | 11.78 | 11.73 | 11.72 | 11.82 | 11.87 | 11.94 | 12.02 |

|         |       |       |       |       |       |       |       |       |       |       |       |
|---------|-------|-------|-------|-------|-------|-------|-------|-------|-------|-------|-------|
| 80.51   | 12.03 | 12.08 | 12.02 | 11.99 | 11.96 | 11.86 | 11.94 | 11.88 | 11.95 | 11.93 | 11.97 |
| 85.77   | 12.30 | 12.31 | 12.24 | 12.36 | 12.42 | 12.48 | 12.41 | 12.46 | 12.40 | 12.59 | 12.63 |
| 91.38   | 12.06 | 11.95 | 11.95 | 12.04 | 11.74 | 11.89 | 11.83 | 11.91 | 11.91 | 11.81 | 11.84 |
| 97.39   | 11.87 | 12.04 | 11.89 | 11.94 | 12.00 | 11.89 | 12.02 | 12.16 | 12.09 | 12.22 | 12.17 |
| 103.80  | 12.26 | 12.19 | 12.26 | 12.25 | 12.22 | 12.05 | 12.17 | 12.12 | 12.09 | 12.26 | 12.22 |
| 110.66  | 11.79 | 11.73 | 11.65 | 11.61 | 11.68 | 11.67 | 11.52 | 11.57 | 11.59 | 11.57 | 11.55 |
| 117.99  | 11.72 | 11.79 | 11.85 | 11.89 | 11.84 | 11.81 | 11.85 | 11.95 | 11.97 | 12.20 | 12.05 |
| 125.83  | 12.19 | 11.97 | 12.01 | 11.92 | 11.89 | 11.91 | 11.80 | 11.75 | 11.75 | 11.78 | 11.87 |
| 134.21  | 11.83 | 11.85 | 11.70 | 11.75 | 11.76 | 11.59 | 11.72 | 11.54 | 11.59 | 11.71 | 11.62 |
| 143.17  | 11.80 | 11.84 | 11.81 | 11.85 | 11.77 | 11.85 | 11.70 | 11.76 | 11.80 | 11.93 | 11.95 |
| 152.74  | 11.94 | 11.84 | 11.73 | 11.78 | 11.82 | 11.61 | 11.63 | 11.64 | 11.66 | 11.59 | 11.62 |
| 162.97  | 12.01 | 11.93 | 12.00 | 11.94 | 11.83 | 11.87 | 11.79 | 11.76 | 11.98 | 11.87 | 11.92 |
| 173.91  | 11.98 | 11.99 | 11.97 | 11.90 | 11.93 | 11.96 | 11.80 | 11.93 | 11.89 | 11.85 | 11.95 |
| 185.60  | 12.03 | 11.79 | 11.86 | 11.91 | 11.76 | 11.67 | 11.71 | 11.65 | 11.55 | 11.58 | 11.68 |
| 198.10  | 11.98 | 12.01 | 11.95 | 11.94 | 11.84 | 11.80 | 11.86 | 11.80 | 11.91 | 11.91 | 11.91 |
| 211.46  | 12.35 | 12.11 | 12.09 | 12.00 | 12.09 | 12.05 | 11.83 | 11.83 | 11.88 | 11.99 | 11.98 |
| 225.75  | 11.99 | 11.99 | 11.91 | 11.88 | 11.97 | 11.95 | 11.85 | 12.00 | 11.99 | 11.90 | 12.11 |
| 241.01  | 12.03 | 11.92 | 11.85 | 11.80 | 11.71 | 11.72 | 11.53 | 11.68 | 11.56 | 11.53 | 11.45 |
| 257.33  | 12.01 | 12.11 | 11.94 | 11.98 | 11.89 | 11.92 | 11.85 | 11.89 | 11.99 | 11.95 | 11.82 |
| 274.77  | 12.03 | 11.94 | 11.82 | 11.80 | 11.76 | 11.67 | 11.70 | 11.72 | 11.67 | 11.92 | 11.75 |
| 293.42  | 12.01 | 11.97 | 11.97 | 11.92 | 11.79 | 11.68 | 11.72 | 11.75 | 11.76 | 11.79 | 11.70 |
| 313.35  | 11.76 | 11.65 | 11.67 | 11.55 | 11.52 | 11.44 | 11.39 | 11.32 | 11.39 | 11.35 | 11.32 |
| 334.66  | 12.09 | 11.95 | 11.97 | 11.91 | 11.88 | 11.81 | 11.69 | 11.80 | 11.79 | 11.78 | 11.77 |
| 357.43  | 12.25 | 12.14 | 12.09 | 12.09 | 12.14 | 12.05 | 12.00 | 12.11 | 12.03 | 12.05 | 12.01 |
| 381.78  | 11.65 | 11.68 | 11.52 | 11.50 | 11.53 | 11.26 | 11.26 | 11.16 | 11.14 | 11.17 | 11.07 |
| 407.80  | 11.92 | 11.84 | 11.87 | 11.84 | 11.67 | 11.64 | 11.54 | 11.52 | 11.48 | 11.39 | 11.37 |
| 435.62  | 11.79 | 11.86 | 11.67 | 11.61 | 11.64 | 11.62 | 11.63 | 11.60 | 11.56 | 11.64 | 11.66 |
| 465.35  | 11.73 | 11.79 | 11.59 | 11.52 | 11.48 | 11.38 | 11.31 | 11.38 | 11.25 | 11.27 | 11.14 |
| 497.14  | 11.83 | 11.82 | 11.65 | 11.61 | 11.49 | 11.48 | 11.50 | 11.43 | 11.53 | 11.47 | 11.35 |
| 531.11  | 11.46 | 11.40 | 11.27 | 11.27 | 11.30 | 11.25 | 11.12 | 11.10 | 11.13 | 11.16 | 11.23 |
| 567.43  | 11.54 | 11.57 | 11.55 | 11.24 | 11.29 | 11.32 | 11.22 | 11.23 | 11.18 | 11.24 | 11.12 |
| 606.26  | 11.80 | 11.80 | 11.87 | 11.74 | 11.77 | 11.57 | 11.61 | 11.63 | 11.68 | 11.72 | 11.63 |
| 647.76  | 11.58 | 11.48 | 11.40 | 11.19 | 11.17 | 11.15 | 10.94 | 10.95 | 10.82 | 10.73 | 10.73 |
| 692.12  | 11.25 | 11.29 | 11.14 | 11.17 | 11.06 | 10.92 | 11.01 | 10.91 | 10.93 | 10.92 | 10.87 |
| 739.53  | 11.44 | 11.62 | 11.44 | 11.34 | 11.26 | 11.18 | 11.26 | 11.01 | 11.22 | 11.01 | 10.93 |
| 790.22  | 11.44 | 11.41 | 11.47 | 11.41 | 11.27 | 11.23 | 11.26 | 11.15 | 11.22 | 11.29 | 11.14 |
| 844.40  | 11.65 | 11.63 | 11.62 | 11.55 | 11.50 | 11.28 | 11.43 | 11.27 | 11.24 | 11.13 | 11.20 |
| 902.32  | 11.42 | 11.45 | 11.36 | 11.25 | 11.12 | 11.13 | 10.90 | 10.95 | 10.88 | 10.99 | 10.89 |
| 964.23  | 11.15 | 11.21 | 11.11 | 11.03 | 11.16 | 10.95 | 10.89 | 10.91 | 10.85 | 10.77 | 10.93 |
| 1030.41 | 11.36 | 11.22 | 11.13 | 11.13 | 10.97 | 10.78 | 10.77 | 10.69 | 10.56 | 10.47 | 10.38 |
| 1101.15 | 11.03 | 11.02 | 11.00 | 10.94 | 10.78 | 10.71 | 10.59 | 10.50 | 10.62 | 10.54 | 10.51 |
| 1176.77 | 11.23 | 11.02 | 11.09 | 10.88 | 10.82 | 10.73 | 10.69 | 10.69 | 10.54 | 10.66 | 10.51 |
| 1257.60 | 11.21 | 11.04 | 10.94 | 10.94 | 10.82 | 10.51 | 10.55 | 10.65 | 10.53 | 10.47 | 10.41 |
| 1344.00 | 10.98 | 11.02 | 10.81 | 10.81 | 10.69 | 10.67 | 10.58 | 10.41 | 10.52 | 10.33 | 10.39 |
| 1436.36 | 10.93 | 10.85 | 10.80 | 10.65 | 10.57 | 10.56 | 10.44 | 10.42 | 10.35 | 10.29 | 10.32 |
| 1535.09 | 10.74 | 10.66 | 10.58 | 10.52 | 10.47 | 10.35 | 10.32 | 10.20 | 10.23 | 10.20 | 10.08 |
| 1640.63 | 10.88 | 10.89 | 10.81 | 10.82 | 10.74 | 10.65 | 10.71 | 10.59 | 10.70 | 10.66 | 10.65 |
| 1753.44 | 10.52 | 10.40 | 10.45 | 10.29 | 10.35 | 10.08 | 10.14 | 10.14 | 10.19 | 10.12 | 10.12 |
| 1874.02 | 10.75 | 10.61 | 10.53 | 10.64 | 10.59 | 10.44 | 10.60 | 10.43 | 10.47 | 10.58 | 10.57 |
| 2002.92 | 10.49 | 10.55 | 10.40 | 10.30 | 10.31 | 10.08 | 10.01 | 9.94  | 9.97  | 9.80  | 9.73  |

|         |       |       |       |       |       |       |      |      |      |      |      |
|---------|-------|-------|-------|-------|-------|-------|------|------|------|------|------|
| 2140.71 | 10.49 | 10.39 | 10.30 | 10.24 | 10.11 | 10.10 | 9.89 | 9.86 | 9.71 | 9.82 | 9.66 |
| 2288.00 | 10.25 | 10.18 | 10.23 | 10.14 | 10.01 | 9.90  | 9.78 | 9.77 | 9.59 | 9.63 | 9.55 |
| 2445.44 | 10.36 | 10.38 | 10.17 | 10.18 | 10.04 | 9.96  | 9.94 | 9.95 | 9.93 | 9.88 | 9.80 |
| 2613.73 | 10.13 | 10.01 | 9.91  | 9.92  | 9.83  | 9.61  | 9.55 | 9.48 | 9.49 | 9.43 | 9.31 |
| 2793.63 | 9.99  | 9.79  | 9.82  | 9.66  | 9.61  | 9.56  | 9.53 | 9.43 | 9.27 | 9.23 | 9.08 |
| 2985.93 | 9.82  | 9.75  | 9.61  | 9.50  | 9.47  | 9.52  | 9.30 | 9.26 | 9.23 | 9.28 | 9.06 |
| 3191.49 | 9.49  | 9.42  | 9.35  | 9.31  | 9.26  | 9.25  | 9.17 | 9.19 | 9.27 | 9.04 | 9.00 |
| 3411.21 | 9.13  | 9.03  | 8.95  | 8.86  | 8.74  | 8.71  | 8.64 | 8.60 | 8.42 | 8.49 | 8.39 |
| 3646.09 | 9.01  | 8.92  | 8.94  | 8.92  | 8.76  | 8.77  | 8.64 | 8.52 | 8.57 | 8.73 | 8.70 |
| 3897.16 | 8.68  | 8.67  | 8.51  | 8.54  | 8.54  | 8.53  | 8.31 | 8.29 | 8.23 | 8.28 | 8.25 |

| Wavelength<br>(nm) | 663.05 | 664.47 | 665.89 | 667.32 | 668.74 | 670.17 |
|--------------------|--------|--------|--------|--------|--------|--------|
| -2.74              | -0.10  | -0.10  | -0.17  | -0.16  | -0.07  | -0.12  |
| -2.24              | -0.51  | -0.47  | -0.46  | -0.52  | -0.59  | -0.45  |
| -1.74              | 0.04   | -0.05  | -0.03  | 0.01   | 0.04   | -0.08  |
| -1.24              | 0.33   | 0.30   | 0.35   | 0.34   | 0.38   | 0.32   |
| -0.74              | -0.11  | -0.12  | -0.16  | -0.07  | -0.15  | -0.20  |
| -0.24              | 0.10   | 0.13   | 0.13   | 0.09   | 0.09   | 0.11   |
| -0.14              | 0.27   | 0.32   | 0.23   | 0.37   | 0.35   | 0.48   |
| -0.04              | -0.02  | -0.02  | 0.11   | -0.06  | -0.05  | -0.06  |
| 0.06               | 0.23   | 0.19   | 0.16   | 0.10   | 0.09   | 0.25   |
| 0.16               | -0.26  | -0.40  | -0.35  | -0.42  | -0.55  | -0.45  |
| 0.26               | -0.11  | -0.03  | -0.09  | -0.15  | -0.08  | -0.18  |
| 0.31               | -0.01  | 0.11   | -0.02  | 0.03   | 0.06   | 0.12   |
| 0.36               | 0.01   | -0.06  | -0.07  | -0.13  | -0.07  | 0.00   |
| 0.41               | 0.06   | 0.34   | 0.25   | 0.30   | 0.28   | 0.36   |
| 0.46               | -0.14  | -0.04  | -0.04  | -0.10  | 0.00   | 0.02   |
| 0.51               | -0.12  | -0.11  | -0.02  | -0.05  | -0.10  | -0.11  |
| 0.56               | 0.10   | 0.02   | 0.02   | 0.00   | -0.15  | -0.08  |
| 0.61               | -0.22  | -0.15  | -0.17  | -0.18  | -0.07  | 0.07   |
| 0.66               | 0.10   | 0.07   | 0.02   | -0.06  | 0.07   | 0.05   |
| 0.71               | 0.13   | 0.04   | 0.10   | 0.07   | 0.07   | 0.26   |
| 0.76               | -0.19  | -0.30  | -0.31  | -0.42  | -0.44  | -0.36  |
| 0.81               | -0.25  | -0.16  | -0.34  | -0.20  | -0.17  | -0.21  |
| 0.86               | 0.30   | 0.32   | 0.30   | 0.25   | 0.26   | 0.40   |
| 0.91               | -0.22  | -0.19  | -0.26  | -0.30  | -0.37  | -0.29  |
| 0.96               | -0.21  | -0.17  | -0.24  | -0.27  | -0.33  | -0.35  |
| 1.01               | -0.40  | -0.35  | -0.50  | -0.51  | -0.46  | -0.42  |
| 1.06               | 0.04   | 0.19   | 0.21   | 0.14   | 0.00   | 0.13   |
| 1.11               | -0.07  | -0.09  | -0.10  | -0.13  | -0.24  | -0.07  |
| 1.16               | -0.02  | -0.04  | -0.12  | -0.03  | -0.14  | -0.10  |
| 1.21               | 0.11   | 0.04   | 0.07   | 0.09   | 0.05   | 0.12   |
| 1.26               | -0.08  | -0.08  | -0.11  | -0.33  | -0.16  | -0.01  |
| 1.31               | -0.13  | 0.08   | 0.18   | 0.25   | 0.08   | -0.10  |
| 1.36               | 2.89   | 2.33   | 1.60   | 1.20   | 0.51   | -0.16  |
| 1.41               | 56.88  | 59.14  | 61.08  | 62.62  | 64.36  | 66.97  |
| 1.46               | 74.98  | 72.87  | 69.67  | 68.65  | 69.19  | 71.69  |
| 1.51               | -32.22 | -36.65 | -41.13 | -44.97 | -48.31 | -51.74 |

|      |       |       |       |       |       |       |
|------|-------|-------|-------|-------|-------|-------|
| 1.56 | 21.29 | 21.62 | 21.59 | 21.45 | 21.40 | 21.84 |
| 1.61 | 21.00 | 20.53 | 19.15 | 17.53 | 16.93 | 17.92 |
| 1.66 | 15.47 | 16.03 | 16.44 | 16.95 | 17.22 | 17.70 |
| 1.71 | 16.14 | 16.27 | 16.29 | 16.19 | 16.36 | 16.72 |
| 1.76 | 15.92 | 16.19 | 16.23 | 16.38 | 16.56 | 16.85 |
| 1.81 | 14.21 | 14.51 | 14.78 | 15.06 | 15.06 | 15.59 |
| 1.86 | 15.56 | 15.36 | 15.39 | 15.44 | 15.49 | 15.85 |
| 1.91 | 13.93 | 14.26 | 14.42 | 14.63 | 14.74 | 15.16 |
| 1.96 | 13.80 | 14.04 | 14.09 | 14.31 | 14.33 | 14.68 |
| 2.01 | 15.57 | 15.64 | 15.52 | 15.55 | 15.64 | 16.04 |
| 2.06 | 13.28 | 13.57 | 13.70 | 13.71 | 13.90 | 14.15 |
| 2.11 | 13.98 | 14.07 | 14.24 | 14.04 | 14.14 | 14.56 |
| 2.16 | 14.07 | 14.28 | 14.08 | 14.09 | 14.18 | 14.60 |
| 2.21 | 13.65 | 13.72 | 13.91 | 13.97 | 14.19 | 14.57 |
| 2.26 | 14.42 | 14.48 | 14.47 | 14.46 | 14.58 | 14.82 |
| 2.31 | 13.43 | 13.68 | 13.86 | 14.04 | 13.96 | 14.30 |
| 2.36 | 13.86 | 14.05 | 14.11 | 14.20 | 14.28 | 14.65 |
| 2.41 | 14.39 | 14.45 | 14.33 | 14.30 | 14.43 | 14.75 |
| 2.46 | 12.92 | 13.08 | 13.20 | 13.26 | 13.55 | 13.82 |
| 2.51 | 14.12 | 14.03 | 14.21 | 14.14 | 14.20 | 14.52 |
| 2.56 | 13.57 | 13.85 | 13.96 | 13.91 | 13.87 | 14.12 |
| 2.61 | 12.90 | 13.11 | 13.24 | 13.19 | 13.46 | 13.59 |
| 2.66 | 13.42 | 13.37 | 13.35 | 13.48 | 13.53 | 13.89 |
| 2.71 | 13.21 | 13.27 | 13.42 | 13.29 | 13.45 | 13.89 |
| 2.76 | 12.99 | 13.17 | 13.29 | 13.34 | 13.49 | 13.72 |
| 2.81 | 13.47 | 13.62 | 13.60 | 13.67 | 13.61 | 13.80 |
| 2.86 | 13.61 | 13.70 | 13.76 | 13.82 | 13.84 | 14.20 |
| 2.91 | 12.88 | 13.08 | 12.95 | 12.95 | 13.07 | 13.43 |
| 2.96 | 13.73 | 13.84 | 13.79 | 13.80 | 13.85 | 14.19 |
| 3.01 | 13.15 | 13.29 | 13.39 | 13.54 | 13.73 | 14.02 |
| 3.06 | 13.02 | 13.19 | 13.18 | 13.19 | 13.33 | 13.62 |
| 3.11 | 13.35 | 13.44 | 13.53 | 13.53 | 13.64 | 14.02 |
| 3.16 | 12.80 | 12.87 | 12.88 | 13.02 | 13.13 | 13.52 |
| 3.21 | 12.52 | 12.59 | 12.64 | 12.60 | 12.77 | 13.10 |
| 3.26 | 12.90 | 13.18 | 13.12 | 13.27 | 13.17 | 13.51 |
| 3.31 | 12.52 | 12.61 | 12.67 | 12.69 | 12.73 | 12.97 |
| 3.36 | 13.21 | 13.31 | 13.33 | 13.31 | 13.30 | 13.76 |
| 3.41 | 12.90 | 12.99 | 13.12 | 13.14 | 13.33 | 13.68 |
| 3.46 | 12.42 | 12.55 | 12.67 | 12.56 | 12.69 | 12.97 |
| 3.51 | 13.22 | 13.54 | 13.59 | 13.60 | 13.79 | 14.09 |
| 3.56 | 12.36 | 12.47 | 12.56 | 12.55 | 12.69 | 12.94 |
| 3.61 | 12.97 | 13.05 | 13.11 | 13.18 | 13.21 | 13.33 |
| 3.66 | 12.49 | 12.64 | 12.66 | 12.69 | 12.66 | 12.98 |
| 3.71 | 12.92 | 13.05 | 13.06 | 13.24 | 13.23 | 13.54 |
| 3.76 | 13.07 | 13.24 | 13.29 | 13.30 | 13.27 | 13.52 |
| 3.81 | 12.43 | 12.33 | 12.46 | 12.54 | 12.73 | 12.86 |
| 3.86 | 12.70 | 12.85 | 12.94 | 12.93 | 13.03 | 13.31 |
| 3.91 | 13.18 | 13.32 | 13.37 | 13.42 | 13.55 | 13.86 |
| 3.96 | 12.97 | 13.00 | 13.07 | 13.25 | 13.17 | 13.49 |
| 4.01 | 12.84 | 12.80 | 12.87 | 12.85 | 12.93 | 13.21 |

|      |       |       |       |       |       |       |
|------|-------|-------|-------|-------|-------|-------|
| 4.06 | 12.95 | 13.03 | 13.06 | 13.12 | 13.24 | 13.45 |
| 4.11 | 12.80 | 13.05 | 13.09 | 13.17 | 13.20 | 13.58 |
| 4.16 | 12.82 | 12.81 | 12.91 | 12.78 | 12.93 | 13.19 |
| 4.21 | 13.40 | 13.46 | 13.48 | 13.53 | 13.69 | 13.86 |
| 4.26 | 12.71 | 12.79 | 12.80 | 12.95 | 12.97 | 13.33 |
| 4.31 | 12.92 | 13.15 | 13.37 | 13.39 | 13.37 | 13.79 |
| 4.36 | 12.93 | 12.98 | 13.10 | 13.17 | 13.17 | 13.38 |
| 4.41 | 12.81 | 12.99 | 12.97 | 13.02 | 13.14 | 13.57 |
| 4.46 | 12.79 | 12.95 | 12.86 | 12.90 | 13.14 | 13.49 |
| 4.51 | 12.98 | 13.08 | 13.11 | 13.25 | 13.35 | 13.62 |
| 4.56 | 12.52 | 12.56 | 12.53 | 12.53 | 12.74 | 12.87 |
| 4.61 | 12.51 | 12.79 | 12.67 | 12.73 | 12.81 | 13.14 |
| 4.66 | 12.77 | 12.79 | 12.88 | 13.06 | 13.05 | 13.36 |
| 4.71 | 12.44 | 12.51 | 12.46 | 12.54 | 12.64 | 12.88 |
| 4.76 | 13.06 | 13.32 | 13.36 | 13.27 | 13.50 | 13.77 |
| 4.81 | 12.44 | 12.46 | 12.44 | 12.56 | 12.54 | 12.84 |
| 4.86 | 12.63 | 12.71 | 12.72 | 12.70 | 12.75 | 13.04 |
| 4.91 | 13.10 | 13.31 | 13.35 | 13.31 | 13.48 | 13.77 |
| 4.96 | 12.76 | 12.90 | 12.88 | 13.04 | 13.05 | 13.35 |
| 5.01 | 12.36 | 12.48 | 12.64 | 12.67 | 12.80 | 12.98 |
| 5.06 | 12.88 | 13.07 | 13.15 | 13.15 | 13.23 | 13.55 |
| 5.11 | 12.71 | 12.85 | 12.77 | 12.94 | 13.03 | 13.25 |
| 5.16 | 12.66 | 12.80 | 12.90 | 12.92 | 12.95 | 13.32 |
| 5.21 | 13.11 | 13.23 | 13.26 | 13.30 | 13.32 | 13.68 |
| 5.26 | 12.79 | 12.80 | 12.89 | 13.04 | 13.01 | 13.30 |
| 5.31 | 12.77 | 12.85 | 12.82 | 12.79 | 12.96 | 13.32 |
| 5.38 | 12.82 | 13.00 | 13.12 | 12.93 | 13.17 | 13.37 |
| 5.45 | 13.10 | 13.21 | 13.18 | 13.24 | 13.33 | 13.57 |
| 5.53 | 12.75 | 12.84 | 12.95 | 12.91 | 13.01 | 13.17 |
| 5.61 | 13.01 | 12.94 | 12.95 | 13.05 | 13.07 | 13.40 |
| 5.70 | 12.62 | 12.67 | 12.74 | 12.79 | 12.88 | 13.20 |
| 5.80 | 12.93 | 13.04 | 13.19 | 13.16 | 13.28 | 13.54 |
| 5.90 | 12.51 | 12.60 | 12.60 | 12.58 | 12.77 | 13.04 |
| 6.01 | 12.60 | 12.64 | 12.69 | 12.71 | 12.70 | 13.13 |
| 6.13 | 12.41 | 12.46 | 12.45 | 12.60 | 12.68 | 12.88 |
| 6.25 | 12.18 | 12.34 | 12.43 | 12.59 | 12.56 | 12.87 |
| 6.39 | 12.60 | 12.61 | 12.74 | 12.70 | 12.80 | 13.03 |
| 6.53 | 12.65 | 12.71 | 12.74 | 12.70 | 12.83 | 13.08 |
| 6.69 | 12.08 | 12.27 | 12.27 | 12.28 | 12.38 | 12.60 |
| 6.85 | 12.51 | 12.53 | 12.67 | 12.66 | 12.69 | 12.98 |
| 7.03 | 12.69 | 12.82 | 12.79 | 12.86 | 13.00 | 13.22 |
| 7.21 | 12.40 | 12.44 | 12.52 | 12.57 | 12.61 | 12.82 |
| 7.41 | 12.32 | 12.58 | 12.51 | 12.55 | 12.63 | 12.93 |
| 7.63 | 12.90 | 12.91 | 13.12 | 13.09 | 13.23 | 13.50 |
| 7.86 | 12.21 | 12.23 | 12.31 | 12.40 | 12.53 | 12.67 |
| 8.10 | 12.49 | 12.59 | 12.58 | 12.62 | 12.69 | 12.91 |
| 8.36 | 12.39 | 12.43 | 12.47 | 12.61 | 12.60 | 12.75 |
| 8.64 | 12.39 | 12.50 | 12.48 | 12.50 | 12.62 | 13.02 |
| 8.94 | 12.18 | 12.32 | 12.39 | 12.44 | 12.39 | 12.73 |
| 9.26 | 12.70 | 12.89 | 12.84 | 12.89 | 13.07 | 13.34 |

|        |       |       |       |       |       |       |
|--------|-------|-------|-------|-------|-------|-------|
| 9.60   | 12.24 | 12.23 | 12.33 | 12.30 | 12.46 | 12.77 |
| 9.97   | 12.80 | 13.02 | 12.96 | 13.01 | 13.02 | 13.33 |
| 10.36  | 12.44 | 12.51 | 12.39 | 12.45 | 12.57 | 12.93 |
| 10.77  | 12.89 | 12.90 | 12.95 | 13.13 | 13.15 | 13.42 |
| 11.22  | 12.25 | 12.24 | 12.23 | 12.30 | 12.44 | 12.67 |
| 11.70  | 12.19 | 12.22 | 12.32 | 12.33 | 12.32 | 12.50 |
| 12.21  | 11.76 | 11.98 | 11.82 | 11.80 | 12.02 | 12.21 |
| 12.75  | 12.45 | 12.51 | 12.60 | 12.55 | 12.72 | 12.85 |
| 13.33  | 12.52 | 12.64 | 12.58 | 12.68 | 12.82 | 13.07 |
| 13.95  | 12.05 | 12.21 | 12.32 | 12.26 | 12.39 | 12.71 |
| 14.62  | 12.04 | 12.28 | 12.08 | 12.14 | 12.11 | 12.55 |
| 15.33  | 12.17 | 12.36 | 12.40 | 12.31 | 12.45 | 12.76 |
| 16.09  | 12.07 | 12.14 | 12.19 | 12.15 | 12.30 | 12.52 |
| 16.90  | 12.77 | 12.84 | 12.83 | 12.85 | 13.05 | 13.26 |
| 17.77  | 12.08 | 12.08 | 12.21 | 12.14 | 12.18 | 12.38 |
| 18.70  | 12.22 | 12.40 | 12.38 | 12.39 | 12.57 | 12.78 |
| 19.69  | 12.41 | 12.41 | 12.43 | 12.41 | 12.46 | 12.68 |
| 20.75  | 12.13 | 12.28 | 12.26 | 12.27 | 12.39 | 12.73 |
| 21.89  | 12.44 | 12.67 | 12.63 | 12.66 | 12.70 | 12.93 |
| 23.10  | 12.45 | 12.50 | 12.47 | 12.70 | 12.64 | 12.95 |
| 24.39  | 11.84 | 12.10 | 12.20 | 12.09 | 12.26 | 12.48 |
| 25.78  | 12.59 | 12.61 | 12.63 | 12.66 | 12.72 | 13.06 |
| 27.26  | 12.23 | 12.30 | 12.35 | 12.29 | 12.47 | 12.81 |
| 28.84  | 12.38 | 12.54 | 12.45 | 12.65 | 12.79 | 12.98 |
| 30.53  | 12.27 | 12.31 | 12.16 | 12.31 | 12.37 | 12.63 |
| 32.34  | 11.99 | 12.17 | 12.14 | 12.13 | 12.30 | 12.46 |
| 34.27  | 11.94 | 12.10 | 12.17 | 12.00 | 12.11 | 12.48 |
| 36.34  | 12.05 | 12.27 | 12.29 | 12.29 | 12.38 | 12.58 |
| 38.55  | 12.43 | 12.51 | 12.50 | 12.44 | 12.69 | 12.87 |
| 40.91  | 12.03 | 11.99 | 12.03 | 12.06 | 12.17 | 12.39 |
| 43.43  | 11.57 | 11.54 | 11.61 | 11.71 | 11.66 | 11.93 |
| 46.13  | 11.76 | 11.74 | 11.79 | 11.84 | 11.90 | 12.08 |
| 49.01  | 12.32 | 12.38 | 12.54 | 12.46 | 12.62 | 12.78 |
| 52.09  | 12.32 | 12.37 | 12.45 | 12.48 | 12.50 | 12.86 |
| 55.39  | 11.70 | 11.75 | 11.85 | 11.76 | 11.75 | 12.11 |
| 58.91  | 11.70 | 11.75 | 11.88 | 11.80 | 11.82 | 12.09 |
| 62.68  | 12.01 | 12.31 | 12.27 | 12.30 | 12.42 | 12.70 |
| 66.70  | 11.92 | 12.02 | 12.00 | 12.11 | 12.08 | 12.34 |
| 71.00  | 12.15 | 12.14 | 12.23 | 12.22 | 12.22 | 12.46 |
| 75.60  | 11.98 | 12.20 | 12.29 | 12.24 | 12.27 | 12.61 |
| 80.51  | 11.92 | 11.91 | 11.87 | 12.03 | 11.97 | 12.17 |
| 85.77  | 12.66 | 12.75 | 12.73 | 12.69 | 12.82 | 12.96 |
| 91.38  | 11.88 | 11.95 | 11.97 | 11.98 | 12.00 | 12.20 |
| 97.39  | 12.20 | 12.32 | 12.30 | 12.14 | 12.31 | 12.63 |
| 103.80 | 12.26 | 12.32 | 12.34 | 12.25 | 12.23 | 12.47 |
| 110.66 | 11.63 | 11.55 | 11.70 | 11.66 | 11.60 | 12.00 |
| 117.99 | 12.19 | 12.22 | 12.22 | 12.22 | 12.22 | 12.46 |
| 125.83 | 11.85 | 11.89 | 11.88 | 11.79 | 11.92 | 12.12 |
| 134.21 | 11.66 | 11.75 | 11.69 | 11.65 | 11.72 | 11.83 |
| 143.17 | 11.87 | 12.07 | 12.01 | 12.01 | 12.05 | 12.30 |



|         |       |       |       |       |       |       |
|---------|-------|-------|-------|-------|-------|-------|
| 152.74  | 11.63 | 11.60 | 11.56 | 11.55 | 11.61 | 11.90 |
| 162.97  | 11.82 | 11.88 | 11.96 | 12.01 | 11.96 | 12.20 |
| 173.91  | 11.86 | 11.96 | 12.02 | 11.99 | 11.97 | 12.34 |
| 185.60  | 11.66 | 11.80 | 11.71 | 11.79 | 11.76 | 12.01 |
| 198.10  | 11.88 | 11.96 | 11.95 | 12.04 | 11.99 | 12.22 |
| 211.46  | 11.84 | 11.92 | 11.93 | 11.83 | 11.83 | 12.05 |
| 225.75  | 12.09 | 12.15 | 12.11 | 12.09 | 12.07 | 12.38 |
| 241.01  | 11.46 | 11.65 | 11.45 | 11.53 | 11.48 | 11.73 |
| 257.33  | 11.87 | 11.91 | 12.05 | 12.00 | 11.95 | 12.28 |
| 274.77  | 11.84 | 11.74 | 11.85 | 11.81 | 12.07 | 12.29 |
| 293.42  | 11.85 | 11.84 | 11.84 | 11.83 | 11.77 | 12.04 |
| 313.35  | 11.28 | 11.32 | 11.34 | 11.32 | 11.37 | 11.58 |
| 334.66  | 11.76 | 11.85 | 11.89 | 11.88 | 11.91 | 12.22 |
| 357.43  | 11.97 | 12.02 | 12.09 | 11.98 | 12.11 | 12.20 |
| 381.78  | 11.05 | 11.24 | 11.02 | 11.07 | 10.96 | 11.29 |
| 407.80  | 11.30 | 11.38 | 11.33 | 11.14 | 11.26 | 11.36 |
| 435.62  | 11.71 | 11.71 | 11.78 | 11.78 | 11.73 | 11.93 |
| 465.35  | 11.24 | 11.25 | 11.21 | 11.22 | 11.11 | 11.37 |
| 497.14  | 11.39 | 11.49 | 11.34 | 11.41 | 11.37 | 11.60 |
| 531.11  | 11.18 | 11.14 | 11.19 | 11.17 | 11.23 | 11.43 |
| 567.43  | 11.11 | 11.14 | 11.15 | 11.18 | 11.04 | 11.40 |
| 606.26  | 11.61 | 11.55 | 11.56 | 11.61 | 11.53 | 11.71 |
| 647.76  | 10.80 | 10.62 | 10.52 | 10.64 | 10.46 | 10.63 |
| 692.12  | 10.84 | 10.77 | 10.70 | 10.76 | 10.62 | 10.86 |
| 739.53  | 10.83 | 10.83 | 10.81 | 10.63 | 10.71 | 10.74 |
| 790.22  | 11.11 | 11.24 | 11.06 | 11.07 | 11.12 | 11.22 |
| 844.40  | 11.20 | 11.10 | 11.03 | 10.96 | 10.95 | 11.11 |
| 902.32  | 10.80 | 10.82 | 10.66 | 10.71 | 10.70 | 10.88 |
| 964.23  | 10.91 | 10.78 | 10.82 | 10.66 | 10.74 | 10.95 |
| 1030.41 | 10.31 | 10.20 | 10.10 | 10.10 | 10.16 | 10.22 |
| 1101.15 | 10.42 | 10.55 | 10.54 | 10.42 | 10.45 | 10.63 |
| 1176.77 | 10.50 | 10.44 | 10.46 | 10.43 | 10.27 | 10.44 |
| 1257.60 | 10.42 | 10.25 | 10.21 | 10.13 | 10.18 | 10.30 |
| 1344.00 | 10.31 | 10.34 | 10.37 | 10.23 | 10.15 | 10.26 |
| 1436.36 | 10.25 | 10.16 | 10.15 | 10.11 | 10.06 | 10.21 |
| 1535.09 | 10.15 | 10.06 | 9.99  | 9.99  | 9.99  | 10.08 |
| 1640.63 | 10.67 | 10.63 | 10.56 | 10.49 | 10.50 | 10.60 |
| 1753.44 | 9.97  | 10.05 | 9.95  | 10.05 | 10.12 | 10.26 |
| 1874.02 | 10.55 | 10.52 | 10.49 | 10.30 | 10.39 | 10.48 |
| 2002.92 | 9.67  | 9.63  | 9.65  | 9.54  | 9.49  | 9.64  |
| 2140.71 | 9.62  | 9.65  | 9.52  | 9.39  | 9.33  | 9.43  |
| 2288.00 | 9.50  | 9.38  | 9.40  | 9.35  | 9.34  | 9.47  |
| 2445.44 | 9.72  | 9.75  | 9.77  | 9.71  | 9.61  | 9.83  |
| 2613.73 | 9.23  | 9.17  | 9.11  | 9.09  | 8.96  | 9.07  |
| 2793.63 | 8.95  | 9.11  | 8.97  | 8.92  | 8.79  | 8.96  |
| 2985.93 | 9.02  | 9.10  | 9.06  | 8.92  | 8.83  | 9.06  |
| 3191.49 | 8.96  | 9.02  | 8.94  | 8.92  | 8.88  | 9.02  |
| 3411.21 | 8.31  | 8.23  | 8.26  | 8.30  | 8.26  | 8.29  |
| 3646.09 | 8.54  | 8.61  | 8.64  | 8.56  | 8.50  | 8.67  |
| 3897.16 | 8.12  | 8.12  | 8.10  | 8.16  | 8.16  | 8.29  |

### S8. TD-DFT and UDFT results of D-RC-A and A-RC-A

**Table S9.** Cartesian coordinates of the TD-DFT-optimized ground state structure  $S_0$  of D-RC-A.

|    |             |             |             |
|----|-------------|-------------|-------------|
| Rh | 0.19319600  | -0.17878700 | 0.03356900  |
| C  | -1.11725200 | 1.38628500  | -0.02803000 |
| C  | 1.53070800  | 1.34406000  | -0.01269000 |
| C  | -0.48532800 | 2.60332200  | -0.06533800 |
| C  | 0.94549100  | 2.58137200  | -0.05614500 |
| C  | 1.48242600  | 3.98840900  | -0.10234600 |
| C  | 0.26408300  | 4.82838700  | 0.33819200  |
| C  | -0.97285200 | 4.02810200  | -0.12283300 |
| O  | 1.70042000  | -1.74072300 | 0.09776800  |
| C  | 1.46054500  | -2.98160800 | 0.12681600  |
| C  | 0.19945400  | -3.61069400 | 0.13365100  |
| C  | -1.06662900 | -2.99468100 | 0.11158000  |
| O  | -1.31873100 | -1.75423800 | 0.07904100  |
| C  | 2.68856200  | -3.86540100 | 0.15566400  |
| C  | -2.28728400 | -3.88919900 | 0.12878000  |
| C  | -2.50228000 | 1.22928400  | -0.03450500 |
| C  | 2.91062900  | 1.12385000  | -0.01150100 |
| P  | 0.11934700  | -0.06696300 | 2.36737100  |
| P  | 0.15717800  | -0.21671400 | -2.30339600 |
| C  | 0.60799800  | 1.49846300  | 3.17565500  |
| C  | -1.54511800 | -0.39664800 | 3.04986900  |
| C  | 1.17907700  | -1.30869200 | 3.19599900  |
| C  | 1.22320900  | -1.51141500 | -3.03813100 |
| C  | -1.49618500 | -0.58400300 | -2.99394700 |
| C  | 0.66347900  | 1.29703900  | -3.19572400 |
| C  | -3.71465300 | 1.03657200  | -0.03982500 |
| C  | 4.11318200  | 0.88377500  | -0.01905600 |
| C  | 5.49713600  | 0.58621900  | -0.02699400 |
| C  | -5.10480800 | 0.78807900  | -0.04902500 |
| C  | 5.95308800  | -0.74601600 | 0.00874600  |
| C  | 7.30140000  | -1.05399300 | -0.00266000 |
| C  | 8.28336800  | -0.03630900 | -0.04496600 |
| C  | 7.82670600  | 1.30185700  | -0.08805000 |
| C  | 6.47522600  | 1.59781800  | -0.07717900 |
| C  | -6.03761300 | 1.84798000  | -0.05245000 |
| C  | -7.39644400 | 1.58853700  | -0.06247000 |

|   |              |             |             |
|---|--------------|-------------|-------------|
| C | -7.87204100  | 0.27132400  | -0.06989000 |
| C | -6.95524900  | -0.78876700 | -0.06647600 |
| C | -5.59405500  | -0.53687300 | -0.05593600 |
| N | 9.62172800   | -0.33465900 | -0.04106300 |
| C | -9.33496900  | 0.05842300  | -0.08147000 |
| O | -10.16146600 | 0.95150600  | -0.08510800 |
| O | -9.66790400  | -1.24169200 | -0.08795000 |
| C | -11.06789500 | -1.51180900 | -0.09955900 |
| C | 10.59508300  | 0.72300600  | -0.18905200 |
| C | 10.05189300  | -1.71260600 | -0.10568100 |
| H | 1.78194200   | 4.25359800  | -1.12826500 |
| H | 2.36186800   | 4.14360900  | 0.53293900  |
| H | 0.25571100   | 4.89913100  | 1.43325800  |
| H | 0.28260800   | 5.84993900  | -0.05565900 |
| H | -1.86186700  | 4.21343200  | 0.49019500  |
| H | -1.23970700  | 4.29582000  | -1.15679300 |
| H | 0.20442700   | -4.69503200 | 0.16065100  |
| H | 3.29906800   | -3.60933700 | 1.02909100  |
| H | 2.44786600   | -4.93067900 | 0.18968400  |
| H | 3.29844900   | -3.66639900 | -0.73309600 |
| H | -2.03726100  | -4.95262100 | 0.15006500  |
| H | -2.90097400  | -3.65008700 | 1.00499700  |
| H | -2.90048700  | -3.68464000 | -0.75641700 |
| H | 0.45024600   | 1.43617700  | 4.25769700  |
| H | 1.66246900   | 1.70208100  | 2.97092000  |
| H | 0.01326000   | 2.31860100  | 2.76437600  |
| H | -1.89427000  | -1.36521400 | 2.68255600  |
| H | -2.23936200  | 0.36866400  | 2.69087700  |
| H | -1.53025400  | -0.39859700 | 4.14508900  |
| H | 2.21590100   | -1.15984100 | 2.88157200  |
| H | 1.10812800   | -1.22242900 | 4.28570100  |
| H | 0.86724500   | -2.31118000 | 2.88801600  |
| H | 0.89693700   | -2.49118000 | -2.67647300 |
| H | 1.17075500   | -1.48987400 | -4.13208300 |
| H | 2.25630700   | -1.35374300 | -2.71606400 |
| H | -1.46315100  | -0.64515500 | -4.08709200 |
| H | -1.85160200  | -1.53196700 | -2.58146800 |
| H | -2.19629600  | 0.19885800  | -2.68832900 |
| H | 0.05640000   | 2.13896500  | -2.85167900 |
| H | 1.71206000   | 1.51677000  | -2.97743900 |

|   |              |             |             |
|---|--------------|-------------|-------------|
| H | 0.53289300   | 1.16756200  | -4.27543900 |
| H | 5.22041300   | -1.54777600 | 0.04284300  |
| H | 7.59646900   | -2.09706100 | 0.02054900  |
| H | 8.53684200   | 2.11993800  | -0.13219400 |
| H | 6.15894400   | 2.63687800  | -0.11081700 |
| H | -5.67471900  | 2.87132600  | -0.04680500 |
| H | -8.11571100  | 2.40179800  | -0.06486500 |
| H | -7.31764900  | -1.81149500 | -0.07221700 |
| H | -4.88264200  | -1.35757100 | -0.05350100 |
| H | -11.53473000 | -1.08603600 | -0.99155500 |
| H | -11.15881100 | -2.59780200 | -0.10484800 |
| H | -11.54799000 | -1.09363500 | 0.78899500  |
| H | 10.48781600  | 1.25836300  | -1.14399900 |
| H | 10.51500200  | 1.45723500  | 0.62286900  |
| H | 11.59752500  | 0.29467300  | -0.15103200 |
| H | 9.71104400   | -2.21329200 | -1.02390700 |
| H | 11.14189900  | -1.74867300 | -0.08434500 |
| H | 9.68212100   | -2.28842700 | 0.75249800  |

**Table S10.** Cartesian coordinates of the TD-DFT-optimized excited state structure  $S_1$  of D-RC-A.

|    |             |             |             |
|----|-------------|-------------|-------------|
| Rh | 0.18708100  | -0.18442100 | 0.08844400  |
| C  | -1.11260000 | 1.36434500  | 0.05016100  |
| C  | 1.54404600  | 1.30920600  | 0.01965800  |
| C  | -0.45656700 | 2.61540000  | 0.03486200  |
| C  | 0.93491700  | 2.58279900  | 0.01349700  |
| C  | 1.49865200  | 3.97395100  | -0.05647000 |
| C  | 0.29316700  | 4.84900900  | 0.35204500  |
| C  | -0.96278200 | 4.02983900  | -0.01993700 |
| O  | 1.68281600  | -1.75765900 | 0.11655200  |
| C  | 1.43131100  | -2.99756700 | 0.11256700  |
| C  | 0.16477600  | -3.61324700 | 0.12426900  |
| C  | -1.09456600 | -2.98401500 | 0.16626800  |
| O  | -1.33390700 | -1.74051400 | 0.17872700  |
| C  | 2.65137100  | -3.89191300 | 0.09677300  |
| C  | -2.32343300 | -3.86526600 | 0.20298600  |
| C  | -2.47516300 | 1.20273900  | 0.01726000  |
| C  | 2.89759000  | 1.10612300  | -0.02134000 |
| P  | 0.16475400  | -0.09410800 | 2.43664900  |

|   |              |             |             |
|---|--------------|-------------|-------------|
| P | 0.12388700   | -0.21494500 | -2.25954900 |
| C | 0.71206600   | 1.45288900  | 3.24149900  |
| C | -1.49508200  | -0.38489100 | 3.14336700  |
| C | 1.21215500   | -1.37308900 | 3.22017200  |
| C | 1.38381500   | -1.29585400 | -3.02919000 |
| C | -1.46264000  | -0.83581600 | -2.92277700 |
| C | 0.35070100   | 1.37848500  | -3.12700600 |
| C | -3.70060000  | 1.01502900  | -0.01791300 |
| C | 4.11587200   | 0.87936200  | -0.06009200 |
| C | 5.48019600   | 0.59076700  | -0.09812400 |
| C | -5.07529600  | 0.78104500  | -0.05761600 |
| C | 5.94523900   | -0.74980300 | -0.08171000 |
| C | 7.28895800   | -1.05146400 | -0.11823800 |
| C | 8.27017500   | -0.02771200 | -0.17422000 |
| C | 7.81075400   | 1.31469800  | -0.19001900 |
| C | 6.46504900   | 1.60976500  | -0.15370900 |
| C | -6.01237500  | 1.85291500  | -0.11991000 |
| C | -7.36571900  | 1.60432700  | -0.16018100 |
| C | -7.86620200  | 0.28511300  | -0.14174200 |
| C | -6.94659700  | -0.78477000 | -0.07910100 |
| C | -5.59004000  | -0.54801100 | -0.03790200 |
| N | 9.60286000   | -0.32266500 | -0.21120400 |
| C | -9.31294400  | 0.08878500  | -0.18888100 |
| O | -10.14544800 | 0.98450800  | -0.24314000 |
| O | -9.66647300  | -1.21783900 | -0.16709000 |
| C | -11.06552100 | -1.46443400 | -0.21141500 |
| C | 10.58138100  | 0.74119800  | -0.25890700 |
| C | 10.04318000  | -1.70001100 | -0.18757700 |
| H | 1.82289500   | 4.19920900  | -1.08470500 |
| H | 2.37547200   | 4.12174700  | 0.58501000  |
| H | 0.31304600   | 4.99833200  | 1.43842300  |
| H | 0.30952900   | 5.83956800  | -0.11386900 |
| H | -1.80886900  | 4.21771900  | 0.65210300  |
| H | -1.31220800  | 4.27734900  | -1.03522800 |
| H | 0.15830200   | -4.69778000 | 0.11776300  |
| H | 3.27044000   | -3.67470200 | 0.97475000  |
| H | 2.40129700   | -4.95546800 | 0.09236500  |
| H | 3.25648900   | -3.66372700 | -0.78814600 |
| H | -2.08489400  | -4.93123800 | 0.18279900  |
| H | -2.90072700  | -3.64619000 | 1.10862100  |

|   |              |             |             |
|---|--------------|-------------|-------------|
| H | -2.96723900  | -3.62667000 | -0.65138300 |
| H | 0.60777500   | 1.37668000  | 4.32900200  |
| H | 1.75792600   | 1.64588500  | 2.98704100  |
| H | 0.10894000   | 2.28718500  | 2.87304800  |
| H | -1.88187800  | -1.33434400 | 2.76434900  |
| H | -2.16936500  | 0.40960400  | 2.81070800  |
| H | -1.46054400  | -0.40696200 | 4.23777500  |
| H | 2.24424900   | -1.24570200 | 2.88185900  |
| H | 1.16956600   | -1.30024700 | 4.31222800  |
| H | 0.86725000   | -2.36284400 | 2.90645300  |
| H | 1.22436000   | -2.32621700 | -2.69921600 |
| H | 1.32332100   | -1.25073000 | -4.12193800 |
| H | 2.37839000   | -0.97889000 | -2.70287600 |
| H | -1.47549900  | -0.79391500 | -4.01714000 |
| H | -1.61409000  | -1.86765800 | -2.59563500 |
| H | -2.27790300  | -0.22799400 | -2.51909400 |
| H | -0.42048500  | 2.08305900  | -2.80413000 |
| H | 1.32911600   | 1.79597700  | -2.87374800 |
| H | 0.28354300   | 1.23578000  | -4.21070500 |
| H | 5.21393100   | -1.55219300 | -0.03760200 |
| H | 7.58931200   | -2.09315100 | -0.10281000 |
| H | 8.52147000   | 2.13242700  | -0.23117200 |
| H | 6.14589100   | 2.64813500  | -0.16711300 |
| H | -5.64111300  | 2.87390600  | -0.13503400 |
| H | -8.07662900  | 2.42404500  | -0.20720700 |
| H | -7.31778000  | -1.80473500 | -0.06367000 |
| H | -4.88779400  | -1.37605100 | 0.01017700  |
| H | -11.50539300 | -1.05743400 | -1.12656400 |
| H | -11.17720400 | -2.54912500 | -0.19010700 |
| H | -11.56869100 | -1.01622900 | 0.65028800  |
| H | 10.45815700  | 1.36478000  | -1.15444000 |
| H | 10.51653500  | 1.39252000  | 0.62317200  |
| H | 11.58114600  | 0.30718000  | -0.28538700 |
| H | 9.65781300   | -2.26303800 | -1.04813900 |
| H | 11.13237900  | -1.72853500 | -0.22661800 |
| H | 9.72214100   | -2.21345800 | 0.72885800  |

**Table S11.** Cartesian coordinates of the UDFT-optimized excited state structure T<sub>1</sub> of D-RC-A.

|    |             |             |             |
|----|-------------|-------------|-------------|
| Rh | 0.17898000  | -0.24459900 | 0.15324000  |
| C  | -1.12962000 | 1.29517400  | 0.12274300  |
| C  | 1.53913400  | 1.25619400  | 0.08564400  |
| C  | -0.45955400 | 2.57410100  | 0.14136200  |
| C  | 0.90569300  | 2.54719300  | 0.11553100  |
| C  | 1.47686200  | 3.93630600  | 0.05506900  |
| C  | 0.26595600  | 4.81578400  | 0.43896700  |
| C  | -0.98808800 | 3.98018000  | 0.09608600  |
| O  | 1.66640800  | -1.82210600 | 0.17401100  |
| C  | 1.40783300  | -3.06040500 | 0.14617200  |
| C  | 0.13787200  | -3.66974000 | 0.14224800  |
| C  | -1.11774200 | -3.03476200 | 0.20416200  |
| O  | -1.34900400 | -1.79080100 | 0.24099200  |
| C  | 2.62354700  | -3.96064000 | 0.12574700  |
| C  | -2.35155300 | -3.90963700 | 0.23109600  |
| C  | -2.47881400 | 1.15156500  | 0.05203000  |
| C  | 2.88848000  | 1.07528900  | 0.00719700  |
| P  | 0.15125400  | -0.18384800 | 2.50393800  |
| P  | 0.18370300  | -0.25514600 | -2.19003900 |
| C  | 0.81527500  | 1.30395400  | 3.33330300  |
| C  | -1.52686300 | -0.36123300 | 3.20678200  |
| C  | 1.08960500  | -1.55370700 | 3.27363000  |
| C  | 1.70212100  | -0.96502900 | -2.92149700 |
| C  | -1.17346000 | -1.23893500 | -2.92366200 |
| C  | 0.03006800  | 1.36098700  | -3.03179400 |
| C  | -3.71101700 | 0.98677500  | -0.01435400 |
| C  | 4.11177500  | 0.87523600  | -0.06978600 |
| C  | 5.48873400  | 0.62264500  | -0.15116100 |
| C  | -5.08827700 | 0.78907600  | -0.08935000 |
| C  | 5.99189400  | -0.69977300 | -0.17720800 |
| C  | 7.34562500  | -0.96126500 | -0.25554700 |
| C  | 8.29420400  | 0.08836900  | -0.31825700 |
| C  | 7.79570200  | 1.41323000  | -0.28468500 |
| C  | 6.44021100  | 1.66769600  | -0.20631100 |
| C  | -5.99040600 | 1.88728800  | -0.15125700 |
| C  | -7.35068600 | 1.67782100  | -0.22839300 |
| C  | -7.88105400 | 0.37552300  | -0.24676500 |
| C  | -7.00058800 | -0.72042400 | -0.18383900 |

|   |              |             |             |
|---|--------------|-------------|-------------|
| C | -5.63726400  | -0.52337800 | -0.10721500 |
| N | 9.63808100   | -0.16760500 | -0.41058200 |
| C | -9.34108900  | 0.21858700  | -0.33257100 |
| O | -10.13681500 | 1.14022500  | -0.39645200 |
| O | -9.72655000  | -1.07120600 | -0.33434100 |
| C | -11.13232500 | -1.28422000 | -0.41745300 |
| C | 10.58378400  | 0.92434200  | -0.37273300 |
| C | 10.11851400  | -1.52883300 | -0.34501200 |
| H | 1.83077500   | 4.15737200  | -0.96422300 |
| H | 2.33828500   | 4.08070900  | 0.71840100  |
| H | 0.28747800   | 4.99896900  | 1.51994400  |
| H | 0.27561300   | 5.79208500  | -0.05639900 |
| H | -1.81863100  | 4.15813500  | 0.79046400  |
| H | -1.36984200  | 4.21794300  | -0.90974800 |
| H | 0.12618000   | -4.75394100 | 0.11526800  |
| H | 3.21871400   | -3.78382400 | 1.02909000  |
| H | 2.36812500   | -5.02155600 | 0.07154600  |
| H | 3.25556900   | -3.69970500 | -0.73071400 |
| H | -2.11896800  | -4.97676600 | 0.20260500  |
| H | -2.92976300  | -3.69441000 | 1.13695200  |
| H | -2.99093800  | -3.66053900 | -0.62357700 |
| H | 0.72634300   | 1.21328700  | 4.42109400  |
| H | 1.86699200   | 1.43091700  | 3.06128400  |
| H | 0.26512200   | 2.18503200  | 2.99176000  |
| H | -1.98392900  | -1.26767700 | 2.80076700  |
| H | -2.13825000  | 0.49131500  | 2.89767600  |
| H | -1.49661700  | -0.41688500 | 4.30012000  |
| H | 2.13225900   | -1.50335800 | 2.94831200  |
| H | 1.04117500   | -1.49738900 | 4.36648600  |
| H | 0.67241600   | -2.50812500 | 2.93831400  |
| H | 1.79213000   | -2.01375700 | -2.62699800 |
| H | 1.68246900   | -0.89395900 | -4.01432800 |
| H | 2.56898200   | -0.42414300 | -2.53047800 |
| H | -1.15855100  | -1.17729200 | -4.01714600 |
| H | -1.06895100  | -2.28355900 | -2.61747600 |
| H | -2.12926400  | -0.86327500 | -2.54696500 |
| H | -0.90990900  | 1.83742300  | -2.73952400 |
| H | 0.85648600   | 2.01004100  | -2.72972000 |
| H | 0.04887500   | 1.22855200  | -4.11878800 |
| H | 5.28875000   | -1.52702100 | -0.13024300 |



|   |              |             |             |
|---|--------------|-------------|-------------|
| H | 7.67447200   | -1.99451400 | -0.26647900 |
| H | 8.47977100   | 2.25384200  | -0.31925700 |
| H | 6.09277300   | 2.69697300  | -0.18302900 |
| H | -5.58982200  | 2.89663700  | -0.13757200 |
| H | -8.03748100  | 2.51755400  | -0.27623800 |
| H | -7.40196800  | -1.72861400 | -0.19646800 |
| H | -4.96069300  | -1.37182400 | -0.05815400 |
| H | -11.53362600 | -0.86243500 | -1.34295200 |
| H | -11.26898700 | -2.36562000 | -0.40391600 |
| H | -11.64446300 | -0.82593900 | 0.43293800  |
| H | 10.42094400  | 1.62442500  | -1.20227900 |
| H | 10.52706000  | 1.49165000  | 0.56781600  |
| H | 11.59465300  | 0.52589100  | -0.46803000 |
| H | 9.70452400   | -2.13932900 | -1.15784700 |
| H | 11.20433200  | -1.53062200 | -0.44849300 |
| H | 9.86508200   | -2.01449300 | 0.60877000  |

**Table S12.** Cartesian coordinates of the TD-DFT-optimized excited state structure  $T_2$  of D-RC-A.

|    |             |             |             |
|----|-------------|-------------|-------------|
| Rh | 0.18739300  | -0.13625900 | 0.03904600  |
| C  | -1.11481900 | 1.43028200  | -0.03070100 |
| C  | 1.53435900  | 1.34132500  | -0.00141500 |
| C  | -0.43879200 | 2.66119300  | -0.03770300 |
| C  | 0.95885100  | 2.62043100  | -0.02318000 |
| C  | 1.53505200  | 4.00734100  | -0.06361500 |
| C  | 0.32673100  | 4.88533300  | 0.33016900  |
| C  | -0.92393600 | 4.08332300  | -0.09146600 |
| O  | 1.70351400  | -1.77345400 | 0.10772900  |
| C  | 1.44012700  | -3.00830000 | 0.08920600  |
| C  | 0.16308900  | -3.60611400 | 0.06851900  |
| C  | -1.08622400 | -2.95836300 | 0.08863300  |
| O  | -1.31150500 | -1.71057800 | 0.09999700  |
| C  | 2.64586100  | -3.92422100 | 0.09417900  |
| C  | -2.32844000 | -3.82056500 | 0.10397000  |
| C  | -2.48883800 | 1.31898700  | -0.07842100 |
| C  | 2.89875200  | 1.13651500  | -0.01164800 |
| P  | 0.11161900  | -0.08860100 | 2.39358900  |
| P  | 0.17801600  | -0.20987700 | -2.31508300 |
| C  | 0.70677000  | 1.41446700  | 3.24840500  |

|   |              |             |             |
|---|--------------|-------------|-------------|
| C | -1.58028200  | -0.31595400 | 3.04340900  |
| C | 1.06715800   | -1.43587100 | 3.17827700  |
| C | 1.38271200   | -1.38523700 | -3.03065700 |
| C | -1.42921900  | -0.75141100 | -2.99455600 |
| C | 0.51962400   | 1.34601900  | -3.21526700 |
| C | -3.68928600  | 0.98468600  | -0.11959200 |
| C | 4.10929800   | 0.90727100  | -0.02221400 |
| C | 5.47644200   | 0.59818600  | -0.03003000 |
| C | -5.04776800  | 0.69478500  | -0.16259500 |
| C | 5.91103900   | -0.74670800 | -0.00209200 |
| C | 7.24960600   | -1.07083400 | -0.00750200 |
| C | 8.24559600   | -0.05936400 | -0.04126500 |
| C | 7.80929300   | 1.29153000  | -0.06905600 |
| C | 6.46766400   | 1.60425600  | -0.06365500 |
| C | -5.73323900  | 0.49668700  | -1.40559600 |
| C | -7.07358400  | 0.20921000  | -1.43511900 |
| C | -7.84012700  | 0.09518700  | -0.24423200 |
| C | -7.16467100  | 0.29227500  | 0.99095800  |
| C | -5.82361100  | 0.58001300  | 1.03618000  |
| N | 9.56887400   | -0.37280100 | -0.04647200 |
| C | -9.24536800  | -0.21188000 | -0.34132600 |
| O | -9.87743700  | -0.39753800 | -1.38161800 |
| O | -9.86124800  | -0.28628400 | 0.87742000  |
| C | -11.24447900 | -0.58673800 | 0.82783500  |
| C | 10.56666800  | 0.67667600  | -0.07986500 |
| C | 9.99013600   | -1.75827600 | -0.01281200 |
| H | 1.87879600   | 4.23921500  | -1.08301700 |
| H | 2.39930700   | 4.13751100  | 0.59692900  |
| H | 0.31869500   | 5.01411800  | 1.41914800  |
| H | 0.36305000   | 5.88285900  | -0.11743000 |
| H | -1.79494700  | 4.26616900  | 0.54619800  |
| H | -1.22833500  | 4.33329000  | -1.11885700 |
| H | 0.13929100   | -4.69042400 | 0.05654300  |
| H | 3.24866300   | -3.72311900 | 0.98729500  |
| H | 2.37991200   | -4.98395100 | 0.07673700  |
| H | 3.27386400   | -3.69997200 | -0.77577600 |
| H | -2.10571800  | -4.88918100 | 0.05881200  |
| H | -2.90201300  | -3.61437900 | 1.01497400  |
| H | -2.97100000  | -3.55041700 | -0.74138500 |
| H | 0.57008100   | 1.32055600  | 4.33091300  |

|   |              |             |             |
|---|--------------|-------------|-------------|
| H | 1.76747600   | 1.56665400  | 3.02882500  |
| H | 0.15091100   | 2.28488900  | 2.88834800  |
| H | -2.00791800  | -1.22040800 | 2.60304800  |
| H | -2.20203800  | 0.53145500  | 2.74101300  |
| H | -1.57467000  | -0.39810600 | 4.13544800  |
| H | 2.11485700   | -1.36139900 | 2.87535500  |
| H | 0.99206500   | -1.38077400 | 4.26964700  |
| H | 0.67828700   | -2.39851600 | 2.83317800  |
| H | 1.14771700   | -2.39452400 | -2.68128600 |
| H | 1.34737500   | -1.36092800 | -4.12515400 |
| H | 2.38846300   | -1.12702300 | -2.68786000 |
| H | -1.41537000  | -0.74152200 | -4.08959800 |
| H | -1.64956300  | -1.76142100 | -2.64007500 |
| H | -2.21625500  | -0.08654000 | -2.62665700 |
| H | -0.20253100  | 2.11145800  | -2.91747400 |
| H | 1.52417600   | 1.70241200  | -2.96994000 |
| H | 0.44780900   | 1.18422200  | -4.29595100 |
| H | 5.16415700   | -1.53502100 | 0.02496200  |
| H | 7.53443000   | -2.11613800 | 0.01486900  |
| H | 8.53331600   | 2.09734600  | -0.09441100 |
| H | 6.16098900   | 2.64597600  | -0.08490800 |
| H | -5.17237400  | 0.57805900  | -2.33312500 |
| H | -7.57921300  | 0.06149300  | -2.38544400 |
| H | -7.72566300  | 0.21250400  | 1.91716700  |
| H | -5.33152900  | 0.72579500  | 1.99429600  |
| H | -11.42291900 | -1.56258600 | 0.36481000  |
| H | -11.58618900 | -0.59917000 | 1.86450200  |
| H | -11.79592500 | 0.17083000  | 0.26181200  |
| H | 10.47108100  | 1.29524100  | -0.98130700 |
| H | 10.49382100  | 1.33139300  | 0.79801300  |
| H | 11.55890000  | 0.22570100  | -0.08368300 |
| H | 9.62146800   | -2.31314900 | -0.88496700 |
| H | 11.07926400  | -1.80057900 | -0.02130100 |
| H | 9.63714100   | -2.26545000 | 0.89421700  |

**Table S13.** Cartesian coordinates of the TD-DFT-optimized ground state structure  $S_0$  of A-RC-A.

|    |             |             |             |
|----|-------------|-------------|-------------|
| Rh | 0.00230100  | -0.19619800 | 0.01737300  |
| C  | 1.29286300  | 1.38074400  | -0.03658600 |
| C  | -1.34793600 | 1.31537900  | -0.03397600 |
| C  | 0.65630100  | 2.59471500  | -0.08027200 |
| C  | -0.77508300 | 2.55876700  | -0.07888300 |
| C  | -1.32296300 | 3.96046100  | -0.13098900 |
| C  | -0.11589600 | 4.81229900  | 0.31756600  |
| C  | 1.13206200  | 4.02331600  | -0.13370700 |
| O  | -1.49220800 | -1.76379700 | 0.07483300  |
| C  | -1.24259300 | -3.00327300 | 0.10996500  |
| C  | 0.02373200  | -3.62090800 | 0.12435200  |
| C  | 1.28471600  | -2.99486400 | 0.10200800  |
| O  | 1.52726600  | -1.75203100 | 0.06429900  |
| C  | -2.46347200 | -3.89598900 | 0.13787800  |
| C  | 2.51244200  | -3.87865200 | 0.12495700  |
| C  | 2.68127000  | 1.23489200  | -0.03103400 |
| C  | -2.72610100 | 1.09503800  | -0.03243300 |
| P  | 0.06093300  | -0.09207100 | 2.35468100  |
| P  | 0.04913900  | -0.24097300 | -2.32217100 |
| C  | -0.45150000 | 1.46562300  | 3.16309300  |
| C  | -0.98847400 | -1.34945000 | 3.17152000  |
| C  | 1.72564500  | -0.40287000 | 3.04466300  |
| C  | 1.71202600  | -0.58288100 | -3.00171000 |
| C  | -0.47746100 | 1.26122800  | -3.22216200 |
| C  | -0.99192100 | -1.55620800 | -3.05472200 |
| C  | 3.89394500  | 1.05300900  | -0.02635900 |
| C  | -3.92768800 | 0.85211400  | -0.03539400 |
| C  | -5.30871900 | 0.54744500  | -0.03637800 |
| C  | 5.28759100  | 0.81343900  | -0.02857400 |
| C  | -6.28144100 | 1.56826400  | -0.06044800 |
| C  | -7.63136900 | 1.25736900  | -0.06126400 |
| C  | -8.04938900 | -0.07918000 | -0.03855900 |
| C  | -7.09062900 | -1.09949400 | -0.01461100 |
| C  | -5.74088400 | -0.79576500 | -0.01329000 |
| C  | 5.78289900  | -0.50791100 | -0.04521900 |
| C  | 7.14617700  | -0.75119300 | -0.05100300 |
| C  | 8.05458000  | 0.31526600  | -0.03959300 |

|   |              |             |             |
|---|--------------|-------------|-------------|
| C | 7.57209500   | 1.62926800  | -0.02198600 |
| C | 6.21107900   | 1.87981200  | -0.01671400 |
| C | -9.47847700  | -0.46497700 | -0.03867600 |
| C | 9.52063100   | 0.11149500  | -0.04630900 |
| O | 10.33966900  | 1.01069900  | -0.03765600 |
| O | 9.86078500   | -1.18552300 | -0.06326800 |
| C | 11.26269800  | -1.44813600 | -0.07120700 |
| O | -9.88033000  | -1.61279600 | -0.01966300 |
| O | -10.29902900 | 0.59527900  | -0.06182700 |
| C | -11.69207000 | 0.28852000  | -0.06327100 |
| H | -2.21091200  | 4.10796600  | 0.49361000  |
| H | -1.61308400  | 4.21676700  | -1.16153800 |
| H | -0.14214200  | 5.83246000  | -0.07874100 |
| H | -0.11653200  | 4.88516700  | 1.41238400  |
| H | 2.01342700   | 4.21592500  | 0.48782500  |
| H | 1.40580300   | 4.29414100  | -1.16488400 |
| H | 0.02790900   | -4.70502800 | 0.15625500  |
| H | -2.21446900  | -4.95907400 | 0.17704000  |
| H | -3.07905500  | -3.64147500 | 1.00817800  |
| H | -3.07153500  | -3.70558700 | -0.75398000 |
| H | 2.27105500   | -4.94376400 | 0.15481200  |
| H | 3.12280400   | -3.67615900 | -0.76268000 |
| H | 3.12497700   | -3.62743200 | 0.99853200  |
| H | -1.50763900  | 1.65667200  | 2.95490400  |
| H | -0.29802100  | 1.40258100  | 4.24564700  |
| H | 0.13508000   | 2.29464300  | 2.75777600  |
| H | -2.02507400  | -1.21435000 | 2.85035900  |
| H | -0.66057400  | -2.34704100 | 2.86448700  |
| H | -0.92599000  | -1.26373700 | 4.26171500  |
| H | 2.09190300   | -1.36304100 | 2.67206500  |
| H | 2.41105000   | 0.37591300  | 2.69794800  |
| H | 1.70287600   | -0.41427700 | 4.13964300  |
| H | 2.39568300   | 0.21698500  | -2.70308100 |
| H | 2.08427400   | -1.51919100 | -2.57778300 |
| H | 1.68377500   | -0.65634400 | -4.09418100 |
| H | 0.11322500   | 2.11511800  | -2.87891200 |
| H | -1.53119000  | 1.46424400  | -3.01283500 |
| H | -0.33761600  | 1.12968300  | -4.30040700 |
| H | -0.65293800  | -2.52880300 | -2.68561700 |
| H | -2.02950000  | -1.41270300 | -2.74079100 |

|   |              |             |             |
|---|--------------|-------------|-------------|
| H | -0.93224600  | -1.53964800 | -4.14834000 |
| H | -5.95938500  | 2.60496100  | -0.07806600 |
| H | -8.37098300  | 2.05088200  | -0.07970100 |
| H | -7.42703900  | -2.13161000 | 0.00314400  |
| H | -4.99548400  | -1.58490300 | 0.00566600  |
| H | 5.07639000   | -1.33268800 | -0.05471400 |
| H | 7.51566200   | -1.77119100 | -0.06469000 |
| H | 8.28645200   | 2.44666300  | -0.01299800 |
| H | 5.84095700   | 2.90040600  | -0.00351400 |
| H | 11.35924300  | -2.53348200 | -0.08499400 |
| H | 11.73029600  | -1.01241400 | -0.95790000 |
| H | 11.73630100  | -1.03445800 | 0.82282200  |
| H | -12.20538400 | 1.24955200  | -0.08338400 |
| H | -11.95465600 | -0.30260700 | -0.94442100 |
| H | -11.96367500 | -0.27010300 | 0.83615500  |

**Table S14.** Cartesian coordinates of the TD-DFT-optimized excited state structure S<sub>1</sub> of A-RC-A.

|    |             |             |             |
|----|-------------|-------------|-------------|
| Rh | 0.00000700  | -0.21175300 | 0.11359100  |
| C  | 1.30182900  | 1.32477800  | 0.07056700  |
| C  | -1.34421100 | 1.27934400  | 0.06249200  |
| C  | 0.64991000  | 2.58337100  | 0.06808600  |
| C  | -0.73739100 | 2.55921100  | 0.06221300  |
| C  | -1.30029600 | 3.95003800  | 0.00828700  |
| C  | -0.08464900 | 4.82066700  | 0.39778600  |
| C  | 1.16351300  | 3.99391500  | 0.01566100  |
| O  | -1.50080600 | -1.76850400 | 0.14870900  |
| C  | -1.25454400 | -3.01037800 | 0.12857700  |
| C  | 0.01000600  | -3.63021900 | 0.11812100  |
| C  | 1.27140100  | -3.00710200 | 0.15982400  |
| O  | 1.51516800  | -1.76317300 | 0.18426400  |
| C  | -2.47817700 | -3.89782100 | 0.12167400  |
| C  | 2.49789400  | -3.89059000 | 0.18231600  |
| C  | 2.66353000  | 1.17416500  | 0.02230500  |
| C  | -2.69883600 | 1.07567900  | 0.02131300  |
| P  | 0.04773800  | -0.15312200 | 2.47043400  |
| P  | 0.03687800  | -0.24190700 | -2.24219000 |
| C  | -0.54283000 | 1.36593500  | 3.29564100  |
| C  | -0.94542700 | -1.48142500 | 3.23931800  |

|   |              |             |             |
|---|--------------|-------------|-------------|
| C | 1.72487000   | -0.39985100 | 3.15014100  |
| C | 1.60879700   | -0.87987900 | -2.92160300 |
| C | -0.18361000  | 1.35718600  | -3.09939400 |
| C | -1.24776000  | -1.30729400 | -2.98850600 |
| C | 3.88893100   | 0.99933500  | -0.02544900 |
| C | -3.91604200  | 0.85103900  | -0.02102400 |
| C | -5.28161400  | 0.56357800  | -0.06845200 |
| C | 5.26817600   | 0.78735900  | -0.07916100 |
| C | -6.25500900  | 1.59678900  | -0.13580500 |
| C | -7.60081500  | 1.29656900  | -0.18570900 |
| C | -8.03879000  | -0.04118000 | -0.16995100 |
| C | -7.08279000  | -1.07163900 | -0.10109700 |
| C | -5.73587800  | -0.78413000 | -0.05184500 |
| C | 5.80007500   | -0.53121100 | -0.07795500 |
| C | 7.16218000   | -0.74327400 | -0.13271400 |
| C | 8.05524800   | 0.34346300  | -0.19120800 |
| C | 7.53860900   | 1.65203200  | -0.19175900 |
| C | 6.17970600   | 1.87673400  | -0.13712600 |
| C | -9.45960200  | -0.41167900 | -0.22362800 |
| C | 9.51334600   | 0.17117600  | -0.25319600 |
| O | 10.32063300  | 1.08463200  | -0.30981600 |
| O | 9.88515500   | -1.12372800 | -0.24179000 |
| C | 11.28939100  | -1.35161100 | -0.30195200 |
| O | -9.88158700  | -1.55676200 | -0.21032500 |
| O | -10.27457900 | 0.65911300  | -0.29171400 |
| C | -11.66545800 | 0.35984100  | -0.34910600 |
| H | -2.16281600  | 4.09559000  | 0.66914800  |
| H | -1.64647800  | 4.17937800  | -1.01165000 |
| H | -0.10068400  | 5.80757000  | -0.07473800 |
| H | -0.09074100  | 4.97724900  | 1.48300400  |
| H | 2.01696200   | 4.17137400  | 0.68038400  |
| H | 1.50653800   | 4.23498800  | -1.00267900 |
| H | 0.01204300   | -4.71446800 | 0.09959700  |
| H | -2.23312200  | -4.96191300 | 0.09063200  |
| H | -3.07595000  | -3.69585600 | 1.01788600  |
| H | -3.10220600  | -3.64881700 | -0.74411800 |
| H | 2.25676400   | -4.95529200 | 0.14335900  |
| H | 3.14339100   | -3.63809600 | -0.66664700 |
| H | 3.07368100   | -3.68872600 | 1.09290000  |
| H | -1.59515900  | 1.53081500  | 3.04746400  |

|   |              |             |             |
|---|--------------|-------------|-------------|
| H | -0.43307800  | 1.27895700  | 4.38168900  |
| H | 0.03427000   | 2.22335600  | 2.93853100  |
| H | -1.98374900  | -1.39330200 | 2.90869600  |
| H | -0.56195000  | -2.45243400 | 2.91197500  |
| H | -0.89874600  | -1.41960900 | 4.33177400  |
| H | 2.14618000   | -1.31677600 | 2.73001200  |
| H | 2.36320300   | 0.43509800  | 2.84757000  |
| H | 1.69981900   | -0.46737500 | 4.24284400  |
| H | 2.43613400   | -0.27882900 | -2.53286300 |
| H | 1.75402500   | -1.91256900 | -2.59464400 |
| H | 1.60594400   | -0.84102300 | -4.01605300 |
| H | 0.59847500   | 2.05388900  | -2.78546000 |
| H | -1.15564100  | 1.78362900  | -2.83624600 |
| H | -0.13013000  | 1.21670300  | -4.18405600 |
| H | -1.08895800  | -2.34139800 | -2.67056700 |
| H | -2.23215400  | -0.98473200 | -2.63799100 |
| H | -1.21016200  | -1.25361500 | -4.08175000 |
| H | -5.92383500  | 2.63105700  | -0.14842400 |
| H | -8.33224400  | 2.09648900  | -0.23796600 |
| H | -7.42990400  | -2.10054000 | -0.08815100 |
| H | -5.00005300  | -1.58130600 | 0.00123500  |
| H | 5.11299100   | -1.37141600 | -0.03271100 |
| H | 7.55306500   | -1.75561500 | -0.13123900 |
| H | 8.23543000   | 2.48355900  | -0.23627900 |
| H | 5.78921200   | 2.89015800  | -0.13810400 |
| H | 11.41480000  | -2.43432200 | -0.28142000 |
| H | 11.70980000  | -0.93827600 | -1.22287800 |
| H | 11.79326500  | -0.89474000 | 0.55421500  |
| H | -12.17361600 | 1.32298200  | -0.39964800 |
| H | -11.89703900 | -0.23825200 | -1.23481200 |
| H | -11.98109600 | -0.18937900 | 0.54221000  |

**Table S15.** Cartesian coordinates of the UDFT-optimized excited state structure  $T_1$  of A-RC-A.

|    |             |             |            |
|----|-------------|-------------|------------|
| Rh | 0.00044300  | -0.24263300 | 0.16459400 |
| C  | 1.31229900  | 1.29473700  | 0.12683400 |
| C  | -1.34986200 | 1.25497100  | 0.12243800 |
| C  | 0.64349200  | 2.57377800  | 0.15528700 |
| C  | -0.72029600 | 2.55315700  | 0.15154800 |
| C  | -1.29298100 | 3.94117600  | 0.11003200 |



|   |              |             |             |
|---|--------------|-------------|-------------|
| C | -0.07345600  | 4.81662500  | 0.47750700  |
| C | 1.17363900   | 3.97917300  | 0.11400800  |
| O | -1.49894600  | -1.80180500 | 0.19322600  |
| C | -1.24911000  | -3.04193400 | 0.15364500  |
| C | 0.01713000   | -3.65861000 | 0.13073600  |
| C | 1.27732300   | -3.03332400 | 0.18302400  |
| O | 1.51839600   | -1.79010200 | 0.22575300  |
| C | -2.47036400  | -3.93336800 | 0.13643800  |
| C | 2.50560300   | -3.91536200 | 0.19335800  |
| C | 2.66365500   | 1.15658900  | 0.04939000  |
| C | -2.69525400  | 1.06929500  | 0.05260600  |
| P | 0.05372200   | -0.20002900 | 2.51813400  |
| P | 0.01366200   | -0.24881300 | -2.18388500 |
| C | -0.57391900  | 1.29343400  | 3.36486300  |
| C | -0.89934700  | -1.55936700 | 3.28624800  |
| C | 1.73840200   | -0.40927700 | 3.19407600  |
| C | 1.52995300   | -0.97960800 | -2.89777900 |
| C | -0.10497700  | 1.37282400  | -3.02052900 |
| C | -1.35128800  | -1.20840600 | -2.93287000 |
| C | 3.89325400   | 0.99234300  | -0.02468800 |
| C | -3.91828700  | 0.86068300  | -0.01680400 |
| C | -5.28571300  | 0.58470500  | -0.09454100 |
| C | 5.27458000   | 0.79723100  | -0.10619700 |
| C | -6.24875800  | 1.62527700  | -0.15194300 |
| C | -7.59729000  | 1.33662700  | -0.23149300 |
| C | -8.04182700  | 0.00415700  | -0.25615400 |
| C | -7.09803100  | -1.03439700 | -0.19806800 |
| C | -5.74871300  | -0.75774200 | -0.11925900 |
| C | 5.82166700   | -0.51253000 | -0.13454500 |
| C | 7.18661300   | -0.70693300 | -0.21615100 |
| C | 8.06144800   | 0.39104500  | -0.27327600 |
| C | 7.53189600   | 1.69120400  | -0.24509000 |
| C | 6.16986700   | 1.89739100  | -0.16309700 |
| C | -9.46957200  | -0.35561000 | -0.34196800 |
| C | 9.52564500   | 0.23688800  | -0.36298900 |
| O | 10.31578000  | 1.16189400  | -0.42108600 |
| O | 9.91125500   | -1.05014600 | -0.37476000 |
| C | 11.31795600  | -1.26282400 | -0.46103800 |
| O | -9.89461000  | -1.49680800 | -0.36305000 |
| O | -10.27287600 | 0.72006300  | -0.39667300 |

|   |              |             |             |
|---|--------------|-------------|-------------|
| C | -11.66662800 | 0.43465800  | -0.48336600 |
| H | -2.14024900  | 4.08190700  | 0.79202000  |
| H | -1.66676000  | 4.16936600  | -0.90039100 |
| H | -0.08764900  | 5.79329600  | -0.01630700 |
| H | -0.07807500  | 4.99801000  | 1.55879700  |
| H | 2.01443300   | 4.14732200  | 0.79774300  |
| H | 1.54277800   | 4.21818900  | -0.89565600 |
| H | 0.02154100   | -4.74252900 | 0.09597500  |
| H | -2.22211100  | -4.99648600 | 0.09649900  |
| H | -3.07111400  | -3.74086000 | 1.03266900  |
| H | -3.09320200  | -3.67901400 | -0.72876400 |
| H | 2.26608700   | -4.98018000 | 0.14643900  |
| H | 3.14685800   | -3.65506600 | -0.65652300 |
| H | 3.08499800   | -3.72005700 | 1.10301900  |
| H | -1.62689500  | 1.44145900  | 3.10836300  |
| H | -0.47374500  | 1.19172300  | 4.45064100  |
| H | -0.01205000  | 2.16804100  | 3.02592600  |
| H | -1.94485500  | -1.48791200 | 2.97438600  |
| H | -0.50281100  | -2.51819600 | 2.93895300  |
| H | -0.83646100  | -1.51214500 | 4.37871500  |
| H | 2.17904500   | -1.31432100 | 2.76762400  |
| H | 2.35605500   | 0.44133100  | 2.89220100  |
| H | 1.72042600   | -0.48236300 | 4.28659800  |
| H | 2.40010800   | -0.44659700 | -2.50336900 |
| H | 1.60504800   | -2.02814900 | -2.59826200 |
| H | 1.52042100   | -0.91322100 | -3.99094100 |
| H | 0.73088900   | 2.00721600  | -2.71309700 |
| H | -1.03858300  | 1.86564100  | -2.73513500 |
| H | -0.08079800  | 1.24213700  | -4.10757800 |
| H | -1.25835500  | -2.25861300 | -2.64332000 |
| H | -2.30470300  | -0.82908200 | -2.55393300 |
| H | -1.33104300  | -1.13002500 | -4.02512600 |
| H | -5.91003200  | 2.65677300  | -0.13313300 |
| H | -8.32216600  | 2.14282200  | -0.27558700 |
| H | -7.45278700  | -2.06047000 | -0.21675200 |
| H | -5.01975800  | -1.56145900 | -0.07394100 |
| H | 5.14654800   | -1.36209500 | -0.08969100 |
| H | 7.59034900   | -1.71387400 | -0.23679400 |
| H | 8.21723700   | 2.53216400  | -0.28894200 |
| H | 5.76678400   | 2.90540400  | -0.14148200 |

|   |              |             |             |
|---|--------------|-------------|-------------|
| H | 11.45397200  | -2.34418700 | -0.45605200 |
| H | 11.71707500  | -0.83341600 | -1.38377700 |
| H | 11.82966800  | -0.81087400 | 0.39277900  |
| H | -12.16478700 | 1.40344600  | -0.51747500 |
| H | -11.88752900 | -0.13873800 | -1.38761300 |
| H | -11.99924800 | -0.13371900 | 0.38924000  |

**Table S16.** Cartesian coordinates of the TD-DFT-optimized excited state structure  $T_2$  of A-RC-A.

|    |             |             |             |
|----|-------------|-------------|-------------|
| Rh | -0.00793400 | -0.19064700 | 0.06949500  |
| C  | -1.29440000 | 1.37915800  | 0.12722200  |
| C  | 1.35444900  | 1.30060300  | 0.13509400  |
| C  | -0.65078100 | 2.60192300  | 0.20727800  |
| C  | 0.78535300  | 2.55885600  | 0.21092900  |
| C  | 1.33869500  | 3.95183100  | 0.29382400  |
| C  | 0.13602300  | 4.82242700  | -0.13284600 |
| C  | -1.11940000 | 4.02673300  | 0.28797000  |
| O  | 1.47893200  | -1.75408500 | 0.01591000  |
| C  | 1.22414300  | -2.99252100 | -0.04601500 |
| C  | -0.04471800 | -3.60271000 | -0.08665800 |
| C  | -1.30273800 | -2.97174000 | -0.05860400 |
| O  | -1.53974900 | -1.72773400 | 0.00323900  |
| C  | 2.44165800  | -3.88812500 | -0.07556300 |
| C  | -2.53475800 | -3.84704200 | -0.10402000 |
| C  | -2.67211900 | 1.23470600  | 0.08245700  |
| C  | 2.72068000  | 1.07252300  | 0.09576900  |
| P  | -0.03768700 | -0.08015800 | -2.27663200 |
| P  | -0.07083100 | -0.27041000 | 2.41584100  |
| C  | 0.47091700  | 1.49184700  | -3.05851200 |
| C  | 1.03809100  | -1.32168300 | -3.08014500 |
| C  | -1.68996000 | -0.40109800 | -2.98877600 |
| C  | -1.74395200 | -0.59924600 | 3.07312300  |
| C  | 0.46893400  | 1.21486600  | 3.33493300  |
| C  | 0.95147000  | -1.60832200 | 3.12971900  |
| C  | -3.89561800 | 1.05343500  | 0.03394500  |
| C  | 3.93170200  | 0.82151000  | 0.05174500  |
| C  | 5.29302900  | 0.52633600  | 0.00547600  |
| C  | -5.26843300 | 0.81863900  | -0.01692300 |
| C  | 6.27299400  | 1.55943900  | -0.09949600 |

|   |              |             |             |
|---|--------------|-------------|-------------|
| C | 7.61457700   | 1.25783500  | -0.14389100 |
| C | 8.05167300   | -0.08781100 | -0.08423600 |
| C | 7.08885500   | -1.12001700 | 0.02036600  |
| C | 5.74661200   | -0.82733900 | 0.06323900  |
| C | -5.77835400  | -0.51485900 | 0.04169200  |
| C | -7.13172200  | -0.75624600 | -0.00598700 |
| C | -8.04956800  | 0.31673800  | -0.11634400 |
| C | -7.55498600  | 1.64173300  | -0.17621900 |
| C | -6.20436900  | 1.89194700  | -0.12754100 |
| C | 9.46886500   | -0.46112400 | -0.12755800 |
| C | -9.50055400  | 0.11513100  | -0.17232000 |
| O | -10.32382400 | 1.01293500  | -0.26616300 |
| O | -9.84962800  | -1.18567800 | -0.10939500 |
| C | -11.24937500 | -1.43988400 | -0.16065600 |
| O | 9.88744100   | -1.60782500 | -0.07991700 |
| O | 10.28644900  | 0.60616200  | -0.22772500 |
| C | 11.67643000  | 0.30233800  | -0.27509300 |
| H | 2.22837200   | 4.10741400  | -0.32659600 |
| H | 1.63254300   | 4.18070000  | 1.33032600  |
| H | 0.16538700   | 5.82812100  | 0.29741600  |
| H | 0.14196600   | 4.93096300  | -1.22426700 |
| H | -1.99532400  | 4.23597800  | -0.33611900 |
| H | -1.40361700  | 4.27403600  | 1.32281200  |
| H | -0.05382700  | -4.68578000 | -0.14072500 |
| H | 2.18935100   | -4.94853600 | -0.14804500 |
| H | 3.07455600   | -3.61185500 | -0.92642900 |
| H | 3.03306100   | -3.72438500 | 0.83265600  |
| H | -2.29889700  | -4.91157900 | -0.17065100 |
| H | -3.13832400  | -3.67153600 | 0.79400000  |
| H | -3.15138500  | -3.56282600 | -0.96434300 |
| H | 1.51717000   | 1.69968000  | -2.81795100 |
| H | 0.35187500   | 1.43318200  | -4.14552500 |
| H | -0.14249200  | 2.30935700  | -2.66919100 |
| H | 2.06628700   | -1.18570000 | -2.73379100 |
| H | 0.70727100   | -2.32418400 | -2.79322700 |
| H | 0.99940000   | -1.22263900 | -4.17018900 |
| H | -2.05389500  | -1.36673000 | -2.62855300 |
| H | -2.38656200  | 0.37037400  | -2.64823000 |
| H | -1.65095300  | -0.40508300 | -4.08324200 |
| H | -2.41148600  | 0.21903200  | 2.78830400  |

|   |              |             |             |
|---|--------------|-------------|-------------|
| H | -2.12839300  | -1.51942100 | 2.62571900  |
| H | -1.72528700  | -0.69685900 | 4.16376800  |
| H | -0.12295900  | 2.07766000  | 3.01642100  |
| H | 1.52153300   | 1.41851900  | 3.11957100  |
| H | 0.34005500   | 1.06423800  | 4.41195300  |
| H | 0.60347500   | -2.57104600 | 2.74376600  |
| H | 1.99223300   | -1.47084500 | 2.82410100  |
| H | 0.88516900   | -1.60779100 | 4.22296400  |
| H | 5.94113700   | 2.59259100  | -0.14428100 |
| H | 8.34911000   | 2.05204800  | -0.22408300 |
| H | 7.43616200   | -2.14757600 | 0.06433200  |
| H | 5.00733800   | -1.61913000 | 0.14123600  |
| H | -5.07292300  | -1.33679000 | 0.12463300  |
| H | -7.50578100  | -1.77353400 | 0.03936000  |
| H | -8.26901600  | 2.45484900  | -0.26058000 |
| H | -5.83070600  | 2.91067200  | -0.17301500 |
| H | -11.35605900 | -2.52322300 | -0.10175200 |
| H | -11.76132800 | -0.96219800 | 0.67929900  |
| H | -11.67741900 | -1.06684100 | -1.09523100 |
| H | 12.18687200  | 1.26240200  | -0.35364200 |
| H | 11.99039000  | -0.22094800 | 0.63231700  |
| H | 11.90767300  | -0.32208700 | -1.14253900 |
